# Supplementary material for: Peritumoral radiomics features predict distant metastasis in locally advanced NSCLC
Source: PubMed Central journal article supplement (PMC6214508; doi:10.1371/journal.pone.0206108), 2018-11-02
Supplement: pone.0206108.s010.pdf [file pone.0206108.s010.pdf]

X general\_info\_BoundingBox

97 (6, 5, 6, 21, 20, 15)  
98 (5, 6, 6, 13, 12, 10)  
99 (6, 6, 6, 15, 18, 17)  
100 (6, 6, 6, 12, 12, 11)  
102 (6, 6, 5, 19, 20, 18)  
103 (6, 5, 6, 11, 12, 11)  
104 (5, 6, 6, 38, 39, 44)  
105 (6, 6, 6, 26, 39, 35)  
106 (6, 6, 6, 26, 35, 30)  
109 (5, 6, 6, 21, 18, 17)  
110 (7, 6, 6, 15, 38, 24)  
111 (5, 6, 6, 17, 27, 29)  
113 (6, 6, 6, 18, 18, 13)  
115 (5, 5, 5, 17, 18, 14)  
116 (6, 5, 6, 20, 18, 19)  
118 (6, 5, 6, 31, 45, 30)  
119 (6, 6, 5, 16, 15, 17)  
120 (5, 6, 6, 13, 13, 14)  
121 (6, 5, 6, 16, 21, 15)  
122 (6, 6, 5, 35, 37, 42)  
123 (6, 6, 6, 18, 21, 25)  
124 (6, 6, 5, 14, 18, 12)  
125 (6, 6, 5, 15, 14, 15)  
127 (6, 6, 6, 28, 29, 22)  
128 (6, 6, 6, 14, 24, 16)  
129 (6, 6, 6, 21, 22, 27)  
130 (5, 6, 6, 24, 28, 23)  
131 (5, 6, 5, 20, 24, 26)  
132 (5, 5, 6, 12, 10, 9)  
133 (6, 6, 6, 21, 22, 16)  
134 (6, 5, 6, 28, 29, 28)  
137 (5, 6, 6, 14, 16, 18)  
210 (5, 6, 5, 19, 30, 29)  
310 (6, 5, 5, 23, 31, 23)  
410 (6, 6, 6, 28, 29, 39)  
510 (6, 6, 6, 20, 26, 23)  
610 (6, 5, 6, 26, 28, 23)  
710 (6, 5, 6, 27, 37, 40)  
810 (5, 6, 6, 18, 13, 13)  
910 (5, 6, 5, 34, 47, 43)  
1010 (6, 6, 6, 19, 17, 19)  
1110 (6, 5, 6, 36, 31, 28)  
1210 (5, 5, 6, 31, 32, 16)  
138 (5, 6, 6, 18, 23, 19)  
142 (6, 6, 6, 15, 20, 18)  
151 (6, 6, 5, 23, 32, 19)  
161 (6, 5, 5, 33, 32, 32)  
171 (6, 5, 6, 16, 10, 12)  
181 (6, 6, 5, 16, 12, 10)  
191 (6, 6, 6, 21, 12, 21)  
201 (6, 6, 6, 20, 29, 29)  
221 (6, 5, 5, 27, 27, 28)  
231 (6, 7, 6, 32, 39, 31)  
241 (6, 5, 6, 13, 22, 18)  
251 (6, 6, 6, 13, 19, 14)  
261 (6, 5, 6, 18, 19, 16)  
271 (6, 6, 6, 31, 39, 27)  
281 (6, 6, 5, 18, 21, 22)  
291 (5, 5, 6, 18, 16, 17)  
301 (6, 5, 5, 41, 44, 48)  
311 (6, 6, 5, 17, 19, 19)  
321 (7, 6, 5, 20, 27, 18)  
331 (5, 6, 5, 29, 44, 44)  
341 (6, 6, 5, 37, 43, 35)  
351 (5, 6, 6, 11, 16, 16)  
361 (6, 6, 6, 26, 26, 27)  
371 (5, 6, 6, 13, 15, 12)  
381 (6, 6, 6, 26, 37, 42)  
391 (6, 6, 5, 34, 30, 36)  
401 (6, 6, 6, 26, 23, 19)  
411 (6, 5, 5, 17, 17, 11)  
421 (6, 6, 5, 31, 30, 32)  
431 (5, 6, 6, 18, 20, 18)  
481 (6, 6, 6, 16, 19, 24)  
491 (6, 6, 6, 19, 35, 35)  
501 (6, 6, 6, 21, 10, 17)  
541 (5, 6, 6, 22, 21, 23)  
551 (5, 5, 6, 13, 13, 11)  
561 (6, 6, 5, 25, 17, 17)  
601 (5, 6, 5, 20, 23, 22)  
611 (6, 5, 6, 20, 20, 15)  
621 (6, 5, 6, 15, 16, 17)  
641 (5, 6, 6, 17, 27, 31)  
661 (5, 5, 5, 23, 23, 25)  
681 (6, 6, 7, 17, 25, 26)  
691 (5, 6, 5, 15, 14, 15)  
701 (5, 6, 6, 24, 25, 14)  
711 (6, 5, 5, 26, 32, 27)  
721 (5, 6, 6, 22, 18, 16)  
751 (5, 5, 6, 19, 18, 16)  
771 (5, 6, 5, 16, 16, 17)  
781 (6, 6, 6, 25, 28, 19)  
791 (6, 6, 6, 32, 29, 33)  
801 (5, 5, 6, 27, 32, 24)  
811 (6, 5, 6, 31, 33, 27)  
821 (6, 6, 5, 23, 23, 26)  
841 (6, 6, 5, 23, 21, 23)  
861 (5, 6, 5, 13, 12, 10)  
871 (5, 5, 6, 12, 13, 10)  
901 (5, 5, 6, 33, 44, 36)





| general_info_VoxelNum | original_shape_Maximum3DDiameter | original_shape_Compactness2 | original_shape_Maximum2DDiameterSlice | original_shape_Sphericity | original_shape_Compactness1 | original_shape_Elongation |
|-----------------------|----------------------------------|-----------------------------|---------------------------------------|---------------------------|-----------------------------|---------------------------|
| 2122                  | 75.29940239                      | 0.062623631                 | 67.41661516                           | 0.39711176                | 0.013276023                 | 1.37134324                |
| 935                   | 50.64582905                      | 0.12526579                  | 45                                    | 0.500354136               | 0.018776521                 | 1.084464496               |
| 1534                  | 72.31182476                      | 0.082081686                 | 56.36488268                           | 0.434592362               | 0.015199245                 | 1.380171384               |
| 977                   | 47.52893855                      | 0.148610242                 | 42.63801121                           | 0.529683259               | 0.02045141                  | 1.069626577               |
| 2368                  | 72.31182476                      | 0.067607347                 | 66.61080993                           | 0.407378369               | 0.013794178                 | 1.052796329               |
| 660                   | 50.64582905                      | 0.178251522                 | 44.59820624                           | 0.562787464               | 0.022398323                 | 1.252392744               |
| 5651                  | 159.4804063                      | 0.026712429                 | 110.6345335                           | 0.298931118               | 0.008670728                 | 1.59166319                |
| 5108                  | 123.2923355                      | 0.030995535                 | 112.0892502                           | 0.314122981               | 0.009340034                 | 1.241208092               |
| 4546                  | 132.7478813                      | 0.032050915                 | 102.396289                            | 0.3176485                 | 0.009497714                 | 1.279671513               |
| 1072                  | 71.18286311                      | 0.098996848                 | 56.92099788                           | 0.462601592               | 0.016692046                 | 1.233173163               |
| 1508                  | 128.8953064                      | 0.070497112                 | 81.49846624                           | 0.41310182                | 0.014085898                 | 3.328643376               |
| 2305                  | 92.36882591                      | 0.055713602                 | 80.04998438                           | 0.381932907               | 0.012522167                 | 1.072567913               |
| 1867                  | 66.54321904                      | 0.095325096                 | 60.74537019                           | 0.456810155               | 0.01637957                  | 1.15252036                |
| 1717                  | 65.8634952                       | 0.096278055                 | 55.07267925                           | 0.458327346               | 0.016461239                 | 1.155014047               |
| 1984                  | 74.21590126                      | 0.069458376                 | 61.77378085                           | 0.41106283                | 0.013981739                 | 1.104529673               |
| 4376                  | 157.1496102                      | 0.036500973                 | 121.4907404                           | 0.331717318               | 0.010135638                 | 1.804453217               |
| 1194                  | 63                               | 0.10162913                  | 57.62811814                           | 0.466665901               | 0.016912507                 | 1.032722034               |
| 1233                  | 54.74486277                      | 0.138954403                 | 43.26661531                           | 0.517953498               | 0.019775844                 | 1.153356446               |
| 1298                  | 72.56031973                      | 0.10626906                  | 69.97142274                           | 0.473662439               | 0.017294272                 | 1.231602364               |
| 5199                  | 155.3351216                      | 0.028694781                 | 104.1393297                           | 0.30615003                | 0.008986702                 | 1.239022226               |
| 3024                  | 84                               | 0.054923716                 | 65.7951366                            | 0.380119345               | 0.012433083                 | 1.228603048               |
| 1079                  | 59.09314681                      | 0.114256089                 | 56.36488268                           | 0.485243565               | 0.017932406                 | 1.118748893               |
| 1024                  | 57.31491952                      | 0.136920728                 | 53.41348144                           | 0.515414224               | 0.019630596                 | 1.210314268               |
| 2647                  | 107.5825265                      | 0.042311806                 | 97.9489663                            | 0.348460739               | 0.010912636                 | 1.340837538               |
| 1273                  | 79.88116173                      | 0.102859108                 | 71.30918594                           | 0.468540983               | 0.017014542                 | 1.696193855               |
| 2369                  | 90.74690077                      | 0.044223122                 | 61.18823416                           | 0.353630568               | 0.011156387                 | 1.732878315               |
| 3233                  | 109.4486181                      | 0.050478069                 | 84.95881355                           | 0.369573576               | 0.011919286                 | 1.765050642               |
| 2762                  | 85.74963557                      | 0.058286907                 | 75.17978452                           | 0.387724879               | 0.01280809                  | 1.023909924               |
| 447                   | 41.89272013                      | 0.229140601                 | 36.61966685                           | 0.611928503               | 0.025395098                 | 1.185071157               |
| 2054                  | 74.75961477                      | 0.062023837                 | 68.47627326                           | 0.395839878               | 0.013212293                 | 1.088643779               |
| 4758                  | 108.2081328                      | 0.034887359                 | 83.57032966                           | 0.326755342               | 0.009909071                 | 1.217189755               |
| 2069                  | 66.2721661                       | 0.096326682                 | 55.80322571                           | 0.458404495               | 0.016465396                 | 1.144473142               |
| 3229                  | 97.34988444                      | 0.044814449                 | 90.24965374                           | 0.355199978               | 0.011230728                 | 1.076333095               |
| 2350                  | 100.9801961                      | 0.061202265                 | 88.63972022                           | 0.394084328               | 0.013124496                 | 1.703164973               |
| 4404                  | 136.7552558                      | 0.027473077                 | 84.90583019                           | 0.301742002               | 0.008793313                 | 1.620972656               |
| 2999                  | 103.4891299                      | 0.051482769                 | 74.09453421                           | 0.372009445               | 0.012037321                 | 1.587316569               |
| 3721                  | 109.5718942                      | 0.051937716                 | 75.95393341                           | 0.373102032               | 0.01209039                  | 1.523897976               |
| 5161                  | 138.1955137                      | 0.033368297                 | 104.1393297                           | 0.321942279               | 0.00969094                  | 1.383380029               |
| 1230                  | 59.62382074                      | 0.118952019                 | 55.15432893                           | 0.491802357               | 0.018297206                 | 1.302046367               |
| 7270                  | 169.864652                       | 0.020369271                 | 138.7155363                           | 0.273102175               | 0.007571582                 | 1.931486384               |
| 2594                  | 71.37226352                      | 0.070721392                 | 62.42595614                           | 0.413539437               | 0.014108287                 | 1.081675111               |
| 3867                  | 140.0392802                      | 0.031677115                 | 107.2054103                           | 0.316408792               | 0.009442167                 | 1.348571065               |
| 3653                  | 107.2473776                      | 0.037487146                 | 100.8017857                           | 0.334678228               | 0.010271647                 | 1.144801578               |
| 2488                  | 86.37708029                      | 0.058254595                 | 72.49827584                           | 0.38765322                | 0.01280454                  | 1.497122385               |
| 1278                  | 69.45502142                      | 0.101168582                 | 64.41273166                           | 0.465959911               | 0.016874142                 | 1.25165878                |
| 2745                  | 101.5135459                      | 0.042035716                 | 95.8927185                            | 0.347701167               | 0.010876974                 | 1.207567386               |
| 4562                  | 113.6045774                      | 0.030615753                 | 98.27003612                           | 0.312834744               | 0.009282637                 | 1.224953626               |
| 871                   | 52.39274759                      | 0.151392993                 | 46.57252409                           | 0.532968971               | 0.020642                    | 1.162285029               |
| 851                   | 54.16641026                      | 0.122987182                 | 46.57252409                           | 0.497301707               | 0.018604963                 | 1.215071511               |
| 1352                  | 87.05170877                      | 0.091782305                 | 52.39274759                           | 0.451079393               | 0.016072312                 | 1.752314885               |
| 2569                  | 114.9826074                      | 0.05871586                  | 88.23264702                           | 0.388673688               | 0.012855133                 | 1.454575513               |
| 3371                  | 95.85927185                      | 0.035813095                 | 84.69356528                           | 0.329620301               | 0.010039678                 | 1.293397983               |
| 4512                  | 134.7998516                      | 0.03245298                  | 106.0660172                           | 0.318971242               | 0.009557101                 | 1.414285437               |
| 1104                  | 71.62401832                      | 0.129824365                 | 67.08203932                           | 0.506351463               | 0.019115118                 | 1.181422404               |
| 1330                  | 65.8634952                       | 0.091616369                 | 60.37383539                           | 0.450807389               | 0.016057777                 | 1.247025457               |
| 1950                  | 69.97142274                      | 0.075651511                 | 60.37383539                           | 0.422933938               | 0.01459176                  | 1.012331435               |
| 4045                  | 130.5258595                      | 0.032432773                 | 108.7060256                           | 0.318905023               | 0.009554125                 | 1.561005511               |
| 3458                  | 78.2879301                       | 0.054345653                 | 68.47627326                           | 0.378781073               | 0.012367482                 | 1.043988825               |
| 1648                  | 69.13031173                      | 0.084278638                 | 56.60388679                           | 0.438435626               | 0.015401309                 | 1.194810307               |
| 9129                  | 182.0384575                      | 0.016046155                 | 138.4232639                           | 0.252226276               | 0.006720234                 | 1.173588073               |
| 1766                  | 73.05477397                      | 0.069224126                 | 70.29224708                           | 0.410600204               | 0.013958142                 | 1.366404256               |
| 2670                  | 89.19641248                      | 0.055130026                 | 77.82673063                           | 0.380594697               | 0.012456412                 | 1.275404315               |
| 5789                  | 165.2180378                      | 0.02064851                  | 112.4499889                           | 0.274416841               | 0.00762632                  | 1.646060303               |
| 7623                  | 169.6260593                      | 0.021297894                 | 146.6321929                           | 0.277190848               | 0.00774225                  | 1.629546298               |
| 790                   | 60.07495318                      | 0.141667007                 | 47.4341649                            | 0.521302218               | 0.019967939                 | 1.218521775               |
| 3862                  | 87.51571287                      | 0.044749865                 | 80.49844719                           | 0.355029065               | 0.011222632                 | 1.012293283               |
| 1304                  | 51.35172831                      | 0.156263378                 | 46.95742753                           | 0.538624044               | 0.020971403                 | 1.157707207               |
| 6250                  | 129.034879                       | 0.025421706                 | 111.3238519                           | 0.294036718               | 0.008458653                 | 1.147599939               |
| 5857                  | 125.463142                       | 0.013489791                 | 106.0235823                           | 0.238050124               | 0.006161713                 | 1.241800574               |
| 2898                  | 87.82368701                      | 0.049217334                 | 80.77747211                           | 0.366470788               | 0.011769497                 | 1.156910825               |
| 1299                  | 63                               | 0.115787806                 | 61.84658438                           | 0.487402338               | 0.018052206                 | 1.227731265               |
| 4290                  | 115.0217371                      | 0.036703628                 | 88.84255737                           | 0.33233009                | 0.010163736                 | 1.262364395               |
| 2279                  | 70.61161378                      | 0.061091921                 | 62.42595614                           | 0.393847348               | 0.013112659                 | 1.039582073               |
| 2259                  | 83.73171442                      | 0.067216806                 | 59.16924877                           | 0.406592432               | 0.013754278                 | 1.35820013                |
| 3131                  | 128.7206277                      | 0.046249784                 | 80.77747211                           | 0.358952159               | 0.011409162                 | 2.32670799                |
| 1342                  | 68.60757976                      | 0.093968261                 | 62.64183905                           | 0.454632415               | 0.016262581                 | 1.122263764               |
| 2396                  | 84.21401309                      | 0.04679019                  | 78.74642849                           | 0.360344809               | 0.011475623                 | 1.017439272               |
| 958                   | 49.65883607                      | 0.150349514                 | 41.67733197                           | 0.531741647               | 0.020570739                 | 1.071856034               |
| 1707                  | 76.72027112                      | 0.071972244                 | 75.89466384                           | 0.415963299               | 0.014232507                 | 1.260131545               |
| 2339                  | 77.88452991                      | 0.061746052                 | 69.26037828                           | 0.395248046               | 0.013182673                 | 1.282881672               |
| 1989                  | 75.29940239                      | 0.051115738                 | 67.8825099                            | 0.371123292               | 0.011994336                 | 1.304387857               |
| 1799                  | 63                               | 0.078645585                 | 55.31726674                           | 0.428441419               | 0.014877709                 | 1.111755813               |
| 3269                  | 105                              | 0.041245833                 | 84.69356528                           | 0.345509527               | 0.010774296                 | 1.127928057               |
| 3073                  | 82.54089895                      | 0.052071076                 | 74.09453421                           | 0.373421097               | 0.012105902                 | 1.071246661               |
| 2439                  | 90.64766958                      | 0.061229139                 | 75.89466384                           | 0.394142002               | 0.013127377                 | 1.132754011               |
| 1532                  | 54.41507144                      | 0.115967818                 | 47.4341649                            | 0.487654791               | 0.018062334                 | 1.017688366               |
| 2385                  | 88.02840451                      | 0.063968145                 | 84.95881355                           | 0.399933623               | 0.013417783                 | 1.609351469               |
| 2742                  | 97.5807358                       | 0.047203068                 | 89.49860334                           | 0.361401605               | 0.011526143                 | 1.499304299               |
| 1464                  | 80.77747211                      | 0.073833493                 | 75.71657678                           | 0.419518521               | 0.014415363                 | 1.669785871               |
| 2025                  | 68.01470429                      | 0.073239808                 | 63.28506933                           | 0.418391063               | 0.01435729                  | 1.076690928               |
| 1304                  | 67.08203932                      | 0.115228949                 | 47.4341649                            | 0.486616914               | 0.018008589                 | 1.18555901                |
| 2382                  | 103.6194962                      | 0.040903759                 | 100.8017857                           | 0.344551709               | 0.010729525                 | 1.412129602               |
| 5183                  | 112.4899996                      | 0.029840236                 | 97.34988444                           | 0.310170686               | 0.009164315                 | 1.182290357               |
| 3300                  | 106.0660172                      | 0.039430137                 | 103.3150521                           | 0.340363329               | 0.010534478                 | 1.281418137               |
| 4352                  | 117.9576195                      | 0.03346594                  | 93.96275858                           | 0.322255997               | 0.009705108                 | 1.20904944                |
| 3422                  | 89.69949833                      | 0.041936427                 | 87.20665112                           | 0.347427193               | 0.010864121                 | 1.051788815               |
| 2817                  | 82.43178998                      | 0.04570773                  | 69.97142274                           | 0.357544321               | 0.011342106                 | 1.068982668               |
| 1047                  | 51.35172831                      | 0.155332305                 | 46.86149806                           | 0.53755214                | 0.020908832                 | 1.137292599               |
| 834                   | 45.29900661                      | 0.161587626                 | 39.11521443                           | 0.544673234               | 0.021325682                 | 1.140484171               |
| 5774                  | 135.1332676                      | 0.025896488                 | 130.2497601                           | 0.295855937               | 0.008537276                 | 1.168917102               |

| original_shape_SurfaceVolumeRatio | original_shape_Volume | original_shape_SphericalDisproportion | original_shape_Flatness | original_shape_SurfaceArea | original_shape_Maximum2DDiameterColumn |
|-----------------------------------|-----------------------|---------------------------------------|-------------------------|----------------------------|----------------------------------------|
| 0.315889358                       | 57294                 | 2.518182791                           | 1.060870444             | 18098.56487                | 63.78087488                            |
| 0.329469213                       | 25245                 | 1.998584459                           | 1.177446459             | 8317.450286                | 42.63801121                            |
| 0.321616998                       | 41418                 | 2.301006847                           | 1.098803186             | 13320.73283                | 58.24946352                            |
| 0.306700936                       | 26379                 | 1.88792072                            | 1.008726864             | 8090.46399                 | 42.63801121                            |
| 0.296873208                       | 69936                 | 2.454720416                           | 1.215195865             | 18980.88541                | 62.42595614                            |
| 0.328980742                       | 17820                 | 1.776869712                           | 1.387353145             | 5862.436824                | 42.42640687                            |
| 0.302749412                       | 152577                | 3.345252267                           | 1.41362668              | 46192.59697                | 129.5221989                            |
| 0.297974795                       | 137916                | 3.183466541                           | 1.33219739              | 41095.49185                | 106.3202709                            |
| 0.306341793                       | 122742                | 3.148133865                           | 1.589884282             | 37601.0044                 | 101.5135459                            |
| 0.340479382                       | 28944                 | 2.161687331                           | 2.03891662              | 9854.835246                | 58.94064811                            |
| 0.340281742                       | 40716                 | 2.420710712                           | 1.151838123             | 13854.91142                | 51.0881591                             |
| 0.319510755                       | 62235                 | 2.618260912                           | 2.11767253              | 19884.75186                | 88.23264702                            |
| 0.28657987                        | 50409                 | 2.189093191                           | 1.130376851             | 14446.20464                | 55.07267925                            |
| 0.293717846                       | 46359                 | 2.181846686                           | 1.21738601              | 13616.46564                | 51.26402247                            |
| 0.31208587                        | 53568                 | 2.432718131                           | 1.336407572             | 16717.81588                | 66.61080993                            |
| 0.29709975                        | 118152                | 3.014614991                           | 1.746993665             | 35102.92967                | 91.83136719                            |
| 0.325603221                       | 32238                 | 2.142860658                           | 1.822738775             | 10496.79663                | 55.80322571                            |
| 0.290235862                       | 33291                 | 1.93067525                            | 1.155041687             | 9662.242081                | 49.2036584                             |
| 0.311986421                       | 35046                 | 2.111208148                           | 1.758471733             | 10933.87612                | 55.31726674                            |
| 0.303940535                       | 140373                | 3.266372372                           | 2.108168158             | 42665.04477                | 152.4106296                            |
| 0.293257393                       | 81648                 | 2.630752721                           | 1.33215662              | 23943.87961                | 80.49844719                            |
| 0.323888805                       | 29133                 | 2.060820735                           | 1.56723125              | 9435.852552                | 47.4341649                             |
| 0.310293838                       | 27648                 | 1.940187043                           | 1.46677384              | 8579.004025                | 48.83646179                            |
| 0.334419071                       | 71469                 | 2.869763758                           | 1.421949849             | 23900.59658                | 98.4073168                             |
| 0.317447919                       | 34371                 | 2.134285017                           | 1.657795676             | 10911.00241                | 52.47857005                            |
| 0.341946412                       | 63963                 | 2.82780984                            | 1.082443886             | 21871.91834                | 87.46427842                            |
| 0.294880556                       | 87291                 | 2.705821153                           | 1.02880536              | 25749.14767                | 77.4209274                             |
| 0.296322509                       | 74574                 | 2.579148396                           | 1.554712328             | 22097.95479                | 79.7198153                             |
| 0.344529446                       | 12069                 | 1.634177842                           | 1.663756938             | 4158.125887                | 39.11521443                            |
| 0.320363611                       | 55458                 | 2.526274022                           | 1.299218261             | 17766.72511                | 70.80254233                            |
| 0.293313483                       | 128466                | 3.060393732                           | 1.106382081             | 37680.80996                | 87.46427842                            |
| 0.275969131                       | 55863                 | 2.181479482                           | 1.25523351              | 15416.46354                | 59.16924877                            |
| 0.307044154                       | 87183                 | 2.815317061                           | 1.854019857             | 26769.03052                | 92.61209424                            |
| 0.30766948                        | 63450                 | 2.537527955                           | 1.241193815             | 19521.62852                | 78.23042886                            |
| 0.325920241                       | 118908                | 3.314089501                           | 1.629960964             | 38754.52399                | 126.1427762                            |
| 0.300480815                       | 80973                 | 2.688103796                           | 1.311578534             | 24330.83304                | 73.79024326                            |
| 0.278814506                       | 100467                | 2.680231982                           | 1.66734344              | 28011.65695                | 79.71198153                            |
| 0.289738963                       | 139347                | 3.106146858                           | 1.462739692             | 40374.25533                | 125.0319959                            |
| 0.305917199                       | 33210                 | 2.033337144                           | 1.28442305              | 10159.51016                | 56.60388679                            |
| 0.304690963                       | 196290                | 3.661633227                           | 1.082166628             | 59807.7891                 | 119.7747887                            |
| 0.283697786                       | 70038                 | 2.418149056                           | 1.077763371             | 19869.62554                | 66.61080993                            |
| 0.324580883                       | 104409                | 3.160468439                           | 1.32541121              | 33889.16537                | 121.3795699                            |
| 0.312741502                       | 98631                 | 2.987944588                           | 1.994485559             | 30846.00712                | 93.04837452                            |
| 0.306880539                       | 67176                 | 2.579625161                           | 1.067699126             | 20615.00711                | 64.20280368                            |
| 0.318789517                       | 34506                 | 2.146107372                           | 1.935540431             | 11000.15107                | 58.24946352                            |
| 0.331112776                       | 74115                 | 2.876032912                           | 1.646524206             | 24540.4234                 | 74.27651042                            |
| 0.310691565                       | 123174                | 3.196575893                           | 1.256197167             | 38269.12282                | 109.2016483                            |
| 0.31670498                        | 23517                 | 1.876281839                           | 1.677687061             | 7447.951023                | 51                                     |
| 0.342057985                       | 22977                 | 2.010851732                           | 1.242272958             | 7859.466315                | 48.46648326                            |
| 0.323184844                       | 36504                 | 2.216904644                           | 1.530863859             | 11797.53954                | 69.97142274                            |
| 0.302823583                       | 69363                 | 2.57285232                            | 1.689564594             | 21004.75219                | 79.71198153                            |
| 0.326158975                       | 91017                 | 3.033793718                           | 1.227442384             | 29686.01141                | 94.15412896                            |
| 0.305835792                       | 121824                | 3.135078868                           | 1.436126259             | 37258.13957                | 113.406349                             |
| 0.308026284                       | 29808                 | 1.974912829                           | 3.431217186             | 9181.647468                | 60.74537019                            |
| 0.325153148                       | 35910                 | 2.218242257                           | 1.399265805             | 11676.24956                | 45.79301257                            |
| 0.30507887                        | 52650                 | 2.364435459                           | 1.401147935             | 16062.40253                | 61.55485359                            |
| 0.3172454                         | 109215                | 3.135729846                           | 1.104763509             | 34647.9564                 | 99.36297097                            |
| 0.28142733                        | 93366                 | 2.640047435                           | 1.163962953             | 26275.74408                | 71.11961755                            |
| 0.311270501                       | 44496                 | 2.280836551                           | 1.216860815             | 13850.29221                | 63.78087488                            |
| 0.30579577                        | 246483                | 3.964693995                           | 1.598483487             | 75373.4588                 | 144.1561653                            |
| 0.324798097                       | 47682                 | 2.435459092                           | 1.256177836             | 15487.02285                | 64.89992296                            |
| 0.305302047                       | 72090                 | 2.627466983                           | 1.473325217             | 22009.22459                | 69.0651866                             |
| 0.327153014                       | 156303                | 3.644091214                           | 1.794150241             | 51134.99754                | 120.9338662                            |
| 0.295489471                       | 205821                | 3.60762272                            | 1.218869348             | 60817.93831                | 106.0660172                            |
| 0.334501138                       | 21330                 | 1.918273057                           | 1.740365755             | 7134.909275                | 48.46648326                            |
| 0.289397564                       | 104274                | 2.816670799                           | 1.286712951             | 30176.64161                | 84.95881355                            |
| 0.273937362                       | 35208                 | 1.856582548                           | 1.064679345             | 9644.786652                | 42.63801121                            |
| 0.29762401                        | 168750                | 3.400935797                           | 1.611525663             | 50224.05171                | 126.6056871                            |
| 0.375666714                       | 158139                | 4.200795964                           | 1.233973444             | 59407.55854                | 119.4738465                            |
| 0.308525251                       | 78246                 | 2.728730454                           | 1.459312009             | 24140.86677                | 76.4852927                             |
| 0.303113685                       | 35073                 | 2.051693073                           | 1.596365791             | 10631.10629                | 53.66563146                            |
| 0.298520464                       | 115830                | 3.009056451                           | 1.285385926             | 34577.62532                | 102.0441081                            |
| 0.311018939                       | 61533                 | 2.539054798                           | 1.096574605             | 19137.92837                | 61.55485359                            |
| 0.302156194                       | 60993                 | 2.459465352                           | 1.399350443             | 18429.41275                | 75.23961722                            |
| 0.306971892                       | 84537                 | 2.785886572                           | 1.362375943             | 25950.48282                | 81.88406438                            |
| 0.321453605                       | 36234                 | 2.199579194                           | 2.331781831             | 11647.54993                | 67.08203932                            |
| 0.334309714                       | 64692                 | 2.775119763                           | 2.066616256             | 21627.16399                | 75.17978452                            |
| 0.30752023                        | 25866                 | 1.880612523                           | 1.164591426             | 7954.318263                | 45                                     |
| 0.324262467                       | 46089                 | 2.404058248                           | 1.576808206             | 14944.93283                | 73.54590403                            |
| 0.307243755                       | 63153                 | 2.530056785                           | 1.196759338             | 19403.36487                | 71.11961755                            |
| 0.345382024                       | 53703                 | 2.694522334                           | 1.069422656             | 18548.05082                | 63.78087488                            |
| 0.309357773                       | 48573                 | 2.334041376                           | 1.077864207             | 15026.43511                | 56.60388679                            |
| 0.314362839                       | 88263                 | 2.894276198                           | 2.027983133             | 27746.60729                | 92.4175308                             |
| 0.296922539                       | 82971                 | 2.677941895                           | 1.353344217             | 24635.96                   | 78                                     |
| 0.303836225                       | 65853                 | 2.537156644                           | 1.424935409             | 20008.5269                 | 74.09453421                            |
| 0.286746056                       | 41364                 | 2.050630937                           | 1.025575023             | 11860.96386                | 48.83646179                            |
| 0.301679285                       | 64395                 | 2.500414922                           | 1.138926958             | 19426.63758                | 62.42595614                            |
| 0.318676699                       | 74034                 | 2.767004869                           | 1.212123551             | 23592.91072                | 91.58602513                            |
| 0.338400793                       | 39528                 | 2.383684985                           | 1.178872823             | 13376.30653                | 67.41661516                            |
| 0.304536109                       | 54675                 | 2.390108411                           | 1.2045207               | 16650.51175                | 61.55485359                            |
| 0.303214388                       | 35208                 | 2.055004607                           | 1.348123981             | 10675.57218                | 55.80322571                            |
| 0.350316997                       | 64314                 | 2.902321987                           | 1.621650897             | 22530.28734                | 79.88116173                            |
| 0.300309025                       | 139941                | 3.224031304                           | 1.303256396             | 42025.54522                | 104.7854952                            |
| 0.31811352                        | 89100                 | 2.938036844                           | 1.773667001             | 28343.91464                | 86.53323061                            |
| 0.306383636                       | 117504                | 3.103123011                           | 1.514004814             | 36001.30277                | 112.6099463                            |
| 0.307897191                       | 92394                 | 2.878300894                           | 1.146789227             | 28447.85309                | 79.71198153                            |
| 0.319230249                       | 76059                 | 2.796856056                           | 1.129231199             | 24280.33348                | 81.05553652                            |
| 0.295320354                       | 28269                 | 1.86028466                            | 1.130995974             | 8348.411094                | 42.63801121                            |
| 0.314416131                       | 22518                 | 1.835963175                           | 1.082908012             | 7080.022433                | 40.80441153                            |
| 0.303708528                       | 155898                | 3.380023428                           | 1.978124981             | 47347.55213                | 127.2792206                            |

| original_shape_Maximum2DDiameterRow | log.sigma.5.0.mm.3D_gldm_GrayLevelVariance | log.sigma.5.0.mm.3D_gldm_HighGrayLevelEmphasis | log.sigma.5.0.mm.3D_gldm_GrayLevelNonUniformityNormalized |
|-------------------------------------|--------------------------------------------|------------------------------------------------|-----------------------------------------------------------|
| 68.41052551                         | 29.79583773                                | 473.0749293                                    | 0.056881767                                               |
| 42.63801121                         | 11.04742372                                | 89.73475936                                    | 0.098442621                                               |
| 65.7951366                          | 21.79449599                                | 212.1949153                                    | 0.060534023                                               |
| 40.36087214                         | 27.317917                                  | 254.9355169                                    | 0.059370642                                               |
| 64.41273166                         | 13.69204754                                | 159.7466216                                    | 0.079170043                                               |
| 38.41874542                         | 16.24443526                                | 96.1030303                                     | 0.079889807                                               |
| 154.2011673                         | 20.11847991                                | 239.5735268                                    | 0.063423862                                               |
| 121.823643                          | 20.74107389                                | 533.6642522                                    | 0.071568452                                               |
| 121.823643                          | 21.23469746                                | 304.6451826                                    | 0.061904617                                               |
| 68.01470429                         | 18.70794929                                | 437.6585821                                    | 0.066988402                                               |
| 127.6322843                         | 13.33828599                                | 143.6432361                                    | 0.076575681                                               |
| 91.38927727                         | 18.63949144                                | 248.6650759                                    | 0.066975593                                               |
| 55.15432893                         | 17.22762989                                | 236.7498661                                    | 0.089019703                                               |
| 61.84658438                         | 20.82261899                                | 361.5765871                                    | 0.072867882                                               |
| 66.61080993                         | 18.88880373                                | 222.1668347                                    | 0.073899665                                               |
| 150.359569                          | 23.82243348                                | 341.4373857                                    | 0.059629724                                               |
| 55.80322571                         | 14.40773171                                | 233.938861                                     | 0.089129343                                               |
| 49.2036584                          | 14.3364505                                 | 98.22303325                                    | 0.091217525                                               |
| 64.41273166                         | 10.18744317                                | 61.66640986                                    | 0.094368247                                               |
| 120.9338662                         | 23.75879385                                | 297.4420081                                    | 0.058465791                                               |
| 78                                  | 11.60540675                                | 181.6904762                                    | 0.087751909                                               |
| 53.16013544                         | 13.2745179                                 | 106.6413346                                    | 0.075976538                                               |
| 49.92995093                         | 16.73999691                                | 122.8662109                                    | 0.072454453                                               |
| 88.58893836                         | 14.07673812                                | 202.420476                                     | 0.080689104                                               |
| 71.30918594                         | 15.47949589                                | 327.3778476                                    | 0.074968729                                               |
| 85.90692638                         | 22.52481958                                | 431.3360068                                    | 0.069461478                                               |
| 85.27602242                         | 27.28671126                                | 601.2100217                                    | 0.064813459                                               |
| 78.74642849                         | 14.13586438                                | 248.429761                                     | 0.08371029                                                |
| 34.20526275                         | 11.89695159                                | 74.57941834                                    | 0.087898943                                               |
| 69.7782201                          | 10.95302988                                | 187.4133398                                    | 0.089007698                                               |
| 104.4844486                         | 18.45629166                                | 334.3064313                                    | 0.068099019                                               |
| 62.42595614                         | 9.370883822                                | 267.9758337                                    | 0.125010249                                               |
| 92.61209424                         | 29.31431233                                | 338.5469186                                    | 0.055956294                                               |
| 98.08669635                         | 24.50556161                                | 418.4689362                                    | 0.063487913                                               |
| 116.498927                          | 17.3629412                                 | 389.5006812                                    | 0.068693022                                               |
| 99.90495483                         | 14.33167219                                | 299.3547849                                    | 0.075403483                                               |
| 104.4844486                         | 18.37302797                                | 644.7847353                                    | 0.094384227                                               |
| 137.3790377                         | 34.44972246                                | 512.5934896                                    | 0.049846183                                               |
| 45                                  | 4.631016591                                | 48.91300813                                    | 0.129372728                                               |
| 167.9196236                         | 30.25077572                                | 283.6341128                                    | 0.051294669                                               |
| 62.42595614                         | 16.84464832                                | 401.1195066                                    | 0.08960361                                                |
| 94.86832981                         | 25.94560138                                | 332.7887251                                    | 0.058427121                                               |
| 103.3150521                         | 21.78207248                                | 349.111689                                     | 0.064019845                                               |
| 80.72174428                         | 14.94837665                                | 207.9662379                                    | 0.078002063                                               |
| 64.20280368                         | 15.88361118                                | 129.4945227                                    | 0.078686866                                               |
| 97.71898485                         | 22.19028285                                | 367.08051                                      | 0.062361439                                               |
| 107.4150827                         | 14.72780826                                | 255.2021043                                    | 0.076258115                                               |
| 40.80441153                         | 9.621280685                                | 51.31343284                                    | 0.095762027                                               |
| 42.63801121                         | 18.07785684                                | 171.5640423                                    | 0.072481259                                               |
| 67.08203932                         | 11.46990159                                | 99.88831361                                    | 0.087351415                                               |
| 112.4499889                         | 21.9093249                                 | 266.4682756                                    | 0.060192634                                               |
| 89.89994438                         | 22.40328588                                | 247.7772174                                    | 0.060185727                                               |
| 119.7747887                         | 16.36400052                                | 195.6283245                                    | 0.07322249                                                |
| 70.03570518                         | 14.94378069                                | 193.2291667                                    | 0.07274765                                                |
| 61.84658438                         | 19.56097236                                | 134.0992481                                    | 0.063947086                                               |
| 59.54829972                         | 12.76839343                                | 284.2235897                                    | 0.084172518                                               |
| 128.8254633                         | 22.89474475                                | 295.0998764                                    | 0.059256052                                               |
| 73.23933369                         | 20.71552909                                | 479.2301909                                    | 0.074213206                                               |
| 58.24946352                         | 9.225194631                                | 226.3404126                                    | 0.099912221                                               |
| 177.1016657                         | 18.84905236                                | 299.9154343                                    | 0.069456652                                               |
| 67.88225099                         | 15.74367344                                | 174.3952435                                    | 0.084055951                                               |
| 87.20665112                         | 20.19845264                                | 273.7951311                                    | 0.063993884                                               |
| 144.7791421                         | 21.66190762                                | 665.6939022                                    | 0.064268844                                               |
| 150.7481343                         | 21.20392009                                | 331.4406402                                    | 0.068993084                                               |
| 53.41348144                         | 10.83832879                                | 177.1177215                                    | 0.087309726                                               |
| 80.77747211                         | 19.21978111                                | 402.0390989                                    | 0.075322607                                               |
| 46.95742753                         | 6.433954397                                | 136.1388037                                    | 0.129505956                                               |
| 128.1600562                         | 23.149056                                  | 443.8912                                       | 0.065938074                                               |
| 115.4512884                         | 20.07015504                                | 343.1181492                                    | 0.067528996                                               |
| 76.83749085                         | 11.64988919                                | 183.2436163                                    | 0.083832357                                               |
| 51.26402247                         | 17.78842611                                | 316.7136259                                    | 0.079586891                                               |
| 102.396289                          | 22.23720633                                | 447.2216783                                    | 0.063826104                                               |
| 63.07138812                         | 17.8398145                                 | 388.3896446                                    | 0.074735249                                               |
| 81.05553652                         | 18.26712137                                | 251.1571492                                    | 0.070589317                                               |
| 128.4056074                         | 26.97179083                                | 243.3557969                                    | 0.057322633                                               |
| 53.66563146                         | 12.51291197                                | 264.8539493                                    | 0.087237724                                               |
| 79.88116173                         | 11.11226331                                | 209.6798831                                    | 0.0883627                                                 |
| 41.67733197                         | 16.75575965                                | 112.1951983                                    | 0.089506671                                               |
| 56.60388679                         | 13.32538371                                | 164.6139426                                    | 0.079007869                                               |
| 72.56031973                         | 35.48248348                                | 576.8255665                                    | 0.059562001                                               |
| 68.41052551                         | 32.57671997                                | 559.8205128                                    | 0.056269007                                               |
| 58.24946352                         | 13.6486931                                 | 352.032796                                     | 0.094783372                                               |
| 103.4456379                         | 21.01016876                                | 319.933007                                     | 0.068161931                                               |
| 80.49844719                         | 16.30519894                                | 342.1588025                                    | 0.077926862                                               |
| 82.37718131                         | 28.56190062                                | 383.8511685                                    | 0.055907648                                               |
| 48.83646179                         | 13.82106702                                | 138.5835509                                    | 0.085769894                                               |
| 74.21590126                         | 23.12077775                                | 313.5052411                                    | 0.066502819                                               |
| 96.84007435                         | 17.42013874                                | 354.3340627                                    | 0.069621805                                               |
| 55.80322571                         | 13.73179066                                | 137.6038251                                    | 0.078810393                                               |
| 65.7951366                          | 17.14204932                                | 211.4587654                                    | 0.075050267                                               |
| 60                                  | 16.60145988                                | 121.4125767                                    | 0.095139072                                               |
| 84.69356528                         | 24.74589314                                | 238.6150294                                    | 0.058626446                                               |
| 107.3312629                         | 16.66468053                                | 433.2010419                                    | 0.077400854                                               |
| 94.15412896                         | 14.75095418                                | 225.8542424                                    | 0.077342516                                               |
| 104.4844486                         | 14.15972013                                | 211.1001838                                    | 0.075937977                                               |
| 84.53401682                         | 26.80623102                                | 643.8103448                                    | 0.066386373                                               |
| 71.56116265                         | 25.93641854                                | 256.055733                                     | 0.057626064                                               |
| 40.80441153                         | 20.41231189                                | 421.1002865                                    | 0.104055887                                               |
| 40.80441153                         | 7.673091742                                | 101.9772182                                    | 0.102369903                                               |
| 131.041978                          | 16.41613934                                | 240.8294077                                    | 0.068879054                                               |

| log.sigma.5.0.mm.3D_gldm_DependenceEntropy | log.sigma.5.0.mm.3D_gldm_DependenceNonUniformity | log.sigma.5.0.mm.3D_gldm_GrayLevelNonUniformity | log.sigma.5.0.mm.3D_gldm_SmallDependenceEmphasis |
|--------------------------------------------|--------------------------------------------------|-------------------------------------------------|--------------------------------------------------|
| 7.114493207                                | 338.1225259                                      | 120.7031103                                     | 0.241218763                                      |
| 6.517927354                                | 110.2898396                                      | 92.04385027                                     | 0.147026362                                      |
| 7.075326457                                | 205.4146023                                      | 92.85919166                                     | 0.184039333                                      |
| 7.090119461                                | 133.6509724                                      | 58.00511771                                     | 0.23050635                                       |
| 7.002184295                                | 282.5869932                                      | 187.4746622                                     | 0.143252056                                      |
| 6.778930508                                | 75.80606061                                      | 52.72727273                                     | 0.210791297                                      |
| 7.157187645                                | 780.3218899                                      | 358.4082463                                     | 0.191015496                                      |
| 7.233213546                                | 592.6002349                                      | 365.5716523                                     | 0.165050068                                      |
| 7.334505428                                | 577.1333004                                      | 281.4183898                                     | 0.176341243                                      |
| 6.80789156                                 | 155.1399254                                      | 71.81156716                                     | 0.2209211                                        |
| 6.85684351                                 | 191.4416446                                      | 115.4761273                                     | 0.159749976                                      |
| 7.068272894                                | 299.0633406                                      | 154.3787419                                     | 0.171153774                                      |
| 7.13958805                                 | 182.3411891                                      | 166.1997858                                     | 0.122036129                                      |
| 7.094172292                                | 210.0879441                                      | 125.1141526                                     | 0.172385109                                      |
| 6.909352487                                | 280.3014113                                      | 146.6169355                                     | 0.197630141                                      |
| 7.046107753                                | 685.5                                            | 260.9396709                                     | 0.184313044                                      |
| 6.55686931                                 | 167.9564489                                      | 106.4204355                                     | 0.166503881                                      |
| 6.930070715                                | 119.8434712                                      | 112.4712084                                     | 0.147031051                                      |
| 6.768294452                                | 136.3281972                                      | 122.4899846                                     | 0.121527384                                      |
| 7.193104105                                | 770.6268513                                      | 303.9636469                                     | 0.187661366                                      |
| 7.039828074                                | 301.8756614                                      | 265.3617725                                     | 0.12873655                                       |
| 6.677319899                                | 144.6589435                                      | 81.97868397                                     | 0.154244464                                      |
| 6.874496713                                | 122.5097656                                      | 74.19335938                                     | 0.145491439                                      |
| 7.058500332                                | 313.3460521                                      | 213.5840574                                     | 0.172494526                                      |
| 6.710397382                                | 192.0369207                                      | 95.43519246                                     | 0.218994337                                      |
| 7.02547685                                 | 332.2216125                                      | 164.5542423                                     | 0.21605281                                       |
| 7.208719981                                | 427.4218992                                      | 209.5419115                                     | 0.201195179                                      |
| 7.004566539                                | 312.0738595                                      | 231.2078204                                     | 0.156796607                                      |
| 6.377958931                                | 51.21923937                                      | 39.29082774                                     | 0.151368964                                      |
| 6.945110341                                | 227.2444012                                      | 182.8218111                                     | 0.116463408                                      |
| 7.241253271                                | 562.5241698                                      | 324.0151324                                     | 0.161739751                                      |
| 6.634709226                                | 194.1445143                                      | 258.6462059                                     | 0.110725175                                      |
| 7.258471967                                | 462.9715082                                      | 180.682874                                      | 0.199329474                                      |
| 7.093323887                                | 341.5268085                                      | 149.1965957                                     | 0.208785311                                      |
| 7.021603986                                | 610.8828338                                      | 302.524069                                      | 0.19647961                                       |
| 7.002738052                                | 353.9676559                                      | 226.135045                                      | 0.157037669                                      |
| 7.119450168                                | 364.7248052                                      | 351.2037087                                     | 0.147178406                                      |
| 7.62041808                                 | 634.7202093                                      | 257.2561519                                     | 0.172794512                                      |
| 6.343352013                                | 138.0520325                                      | 159.1284553                                     | 0.087332444                                      |
| 7.376267588                                | 1107.322146                                      | 372.9122421                                     | 0.207024347                                      |
| 7.014532238                                | 280.5674634                                      | 232.4317656                                     | 0.157280899                                      |
| 7.126168072                                | 615.2932506                                      | 225.9376778                                     | 0.225653119                                      |
| 7.013213381                                | 552.1776622                                      | 233.8644949                                     | 0.214151732                                      |
| 6.928769261                                | 326.5747588                                      | 194.0691318                                     | 0.176288558                                      |
| 6.796773839                                | 154.1032864                                      | 100.5618153                                     | 0.172031625                                      |
| 7.18737282                                 | 360.4000773                                      | 171.1821494                                     | 0.222162482                                      |
| 7.060695016                                | 569.2836475                                      | 347.8895221                                     | 0.156934094                                      |
| 6.419984907                                | 100.8484501                                      | 83.4087256                                      | 0.124809961                                      |
| 6.925348347                                | 101.4559342                                      | 61.68155112                                     | 0.167695828                                      |
| 6.83791521                                 | 141.4778107                                      | 118.0991124                                     | 0.159208451                                      |
| 7.098805166                                | 377.0918645                                      | 154.6348774                                     | 0.198407834                                      |
| 6.989122037                                | 559.9095224                                      | 202.8860872                                     | 0.238117906                                      |
| 7.16975204                                 | 538.412234                                       | 330.3798759                                     | 0.154695498                                      |
| 6.692788487                                | 156.1775362                                      | 80.3134058                                      | 0.222273953                                      |
| 6.949873226                                | 177.0075188                                      | 85.04962406                                     | 0.194156494                                      |
| 6.889585073                                | 241.3128205                                      | 164.1364103                                     | 0.141730585                                      |
| 7.197231139                                | 596.3305315                                      | 239.6907293                                     | 0.213058226                                      |
| 7.159518157                                | 416.7541932                                      | 256.6292655                                     | 0.142179952                                      |
| 6.776668847                                | 171.0364078                                      | 164.6553398                                     | 0.147622839                                      |
| 7.424426711                                | 1040.00011                                       | 634.0697776                                     | 0.154310554                                      |
| 7.003316771                                | 186.0520951                                      | 148.4428086                                     | 0.16381559                                       |
| 7.121989329                                | 353.5213483                                      | 170.8636704                                     | 0.176569677                                      |
| 7.169610701                                | 812.739506                                       | 372.0523406                                     | 0.215576007                                      |
| 7.311760419                                | 903.8576676                                      | 525.9342778                                     | 0.154616997                                      |
| 6.468597366                                | 108.7265823                                      | 68.97468354                                     | 0.164986723                                      |
| 7.274214179                                | 402.1926463                                      | 290.8959089                                     | 0.138853374                                      |
| 6.804613557                                | 107.1947853                                      | 168.8757669                                     | 0.075724394                                      |
| 7.257398035                                | 826.72672                                        | 412.11296                                       | 0.184198583                                      |
| 7.140303997                                | 776.5974048                                      | 395.5173297                                     | 0.208761485                                      |
| 6.98929599                                 | 316.4513458                                      | 242.9461698                                     | 0.123839933                                      |
| 6.85275165                                 | 154.5765974                                      | 103.383718                                      | 0.176924286                                      |
| 7.304669033                                | 528.0503497                                      | 273.813986                                      | 0.166618251                                      |
| 6.980806373                                | 288.1171566                                      | 170.3216323                                     | 0.159687271                                      |
| 6.896060702                                | 319.7233289                                      | 159.461266                                      | 0.190750622                                      |
| 7.319267048                                | 424.4461833                                      | 179.4771638                                     | 0.188510691                                      |
| 6.772564835                                | 162.5633383                                      | 117.0730253                                     | 0.166019368                                      |
| 6.963228241                                | 256.5258765                                      | 211.7170284                                     | 0.150560784                                      |
| 6.916450335                                | 93.32150313                                      | 85.7473904                                      | 0.132022703                                      |
| 6.874691704                                | 212.980082                                       | 134.8664323                                     | 0.149732513                                      |
| 7.053389817                                | 367.2129115                                      | 139.3155195                                     | 0.233445861                                      |
| 7.123506104                                | 323.8979387                                      | 111.9190548                                     | 0.25188702                                       |
| 6.948165316                                | 180.4719288                                      | 170.5152863                                     | 0.137133814                                      |
| 7.165256438                                | 414.2909147                                      | 222.8213521                                     | 0.167070198                                      |
| 7.049371642                                | 382.5958347                                      | 239.4692483                                     | 0.140079739                                      |
| 7.364621306                                | 334.4571546                                      | 136.3587536                                     | 0.202947752                                      |
| 6.994512322                                | 149.189295                                       | 131.3994778                                     | 0.113186029                                      |
| 7.106847801                                | 322.9371069                                      | 158.6092243                                     | 0.187513142                                      |
| 7.09735885                                 | 346.4646244                                      | 190.9029905                                     | 0.194837928                                      |
| 6.855730405                                | 180.4180328                                      | 115.3784153                                     | 0.164629911                                      |
| 7.062267321                                | 242.948642                                       | 151.9767901                                     | 0.152194245                                      |
| 6.682812844                                | 110.3619632                                      | 124.0613497                                     | 0.136380522                                      |
| 7.10538694                                 | 371.6356003                                      | 139.6481948                                     | 0.221428673                                      |
| 7.103783733                                | 635.4958518                                      | 401.1686282                                     | 0.158582524                                      |
| 6.935968151                                | 441.4684848                                      | 255.230303                                      | 0.183731001                                      |
| 6.985639639                                | 566.589614                                       | 330.4820772                                     | 0.150914385                                      |
| 7.362126762                                | 392.1513735                                      | 227.1741672                                     | 0.189370154                                      |
| 7.301556642                                | 384.0976216                                      | 162.3326234                                     | 0.157708882                                      |
| 6.937551487                                | 92.51289398                                      | 108.9465138                                     | 0.155053291                                      |
| 6.579722538                                | 94.8441247                                       | 85.3764988                                      | 0.090453829                                      |
| 7.05953143                                 | 762.4121926                                      | 397.707655                                      | 0.178448606                                      |

| log.sigma.5.0.mm.3D_gldm_DependenceNonUniformityNormalized | log.sigma.5.0.mm.3D_gldm_DependenceVariance | log.sigma.5.0.mm.3D_gldm_LargeDependenceEmphasis |
|------------------------------------------------------------|---------------------------------------------|--------------------------------------------------|
| 0.159341435                                                | 5.656287837                                 | 18.65975495                                      |
| 0.117957048                                                | 7.375824302                                 | 29.87486631                                      |
| 0.133907824                                                | 5.092083993                                 | 22.42242503                                      |
| 0.136797311                                                | 8.215289425                                 | 24.63561924                                      |
| 0.119335723                                                | 7.029215554                                 | 29.76858108                                      |
| 0.114857668                                                | 13.48668503                                 | 36.12121212                                      |
| 0.138085629                                                | 5.07244897                                  | 21.24420457                                      |
| 0.116014142                                                | 7.030345937                                 | 28.49256069                                      |
| 0.126954092                                                | 6.895053913                                 | 25.91509019                                      |
| 0.14472008                                                 | 5.03625181                                  | 19.50746269                                      |
| 0.126950693                                                | 5.90541691                                  | 25.71618037                                      |
| 0.129745484                                                | 6.193833833                                 | 24.86898048                                      |
| 0.09766534                                                 | 11.70591237                                 | 42.83717193                                      |
| 0.122357568                                                | 8.86670857                                  | 29.70005824                                      |
| 0.141280953                                                | 5.612455084                                 | 21.44354839                                      |
| 0.156649909                                                | 3.455447321                                 | 17.65539305                                      |
| 0.140667043                                                | 4.893765309                                 | 21.91457286                                      |
| 0.097196651                                                | 13.2608629                                  | 43.11516626                                      |
| 0.105029428                                                | 9.471304674                                 | 37.71340524                                      |
| 0.148225976                                                | 5.372713271                                 | 21.01923447                                      |
| 0.099826608                                                | 9.890410665                                 | 39.18055556                                      |
| 0.134067603                                                | 4.945532755                                 | 23.50973123                                      |
| 0.119638443                                                | 6.000728607                                 | 27.95507813                                      |
| 0.118377806                                                | 8.592730092                                 | 29.825085                                        |
| 0.150853826                                                | 5.351973337                                 | 19.41005499                                      |
| 0.140237067                                                | 5.428367433                                 | 20.55255382                                      |
| 0.132205969                                                | 5.956052497                                 | 22.75007733                                      |
| 0.112988363                                                | 8.36187034                                  | 31.58435916                                      |
| 0.114584428                                                | 8.413775155                                 | 31.61297539                                      |
| 0.110635054                                                | 8.301520106                                 | 35.2969815                                       |
| 0.118227022                                                | 7.045410301                                 | 28.45985708                                      |
| 0.093834951                                                | 10.55869926                                 | 44.69840503                                      |
| 0.143379222                                                | 4.889716059                                 | 20.20594611                                      |
| 0.145330557                                                | 4.724408148                                 | 19.33957447                                      |
| 0.138710907                                                | 4.815522343                                 | 20.73569482                                      |
| 0.118028561                                                | 6.215107381                                 | 27.47215739                                      |
| 0.098017954                                                | 10.54447325                                 | 39.05106154                                      |
| 0.122983958                                                | 13.21910708                                 | 35.89633792                                      |
| 0.112237425                                                | 7.223078855                                 | 38.6195122                                       |
| 0.152313913                                                | 4.681609221                                 | 18.76836314                                      |
| 0.108160163                                                | 9.257325933                                 | 33.84271396                                      |
| 0.159113848                                                | 3.971485966                                 | 16.69019912                                      |
| 0.151157312                                                | 4.36159743                                  | 18.15083493                                      |
| 0.131259951                                                | 6.39714165                                  | 24.56913183                                      |
| 0.120581601                                                | 6.726793381                                 | 26.77308294                                      |
| 0.13129472                                                 | 5.81524202                                  | 21.87650273                                      |
| 0.124788174                                                | 6.823307728                                 | 27.17404647                                      |
| 0.115784673                                                | 7.542415978                                 | 32.29047072                                      |
| 0.119219664                                                | 6.869244864                                 | 27.43243243                                      |
| 0.104643351                                                | 10.33866986                                 | 36.2943787                                       |
| 0.146785467                                                | 4.529789791                                 | 19.31140522                                      |
| 0.166095972                                                | 4.118306272                                 | 16.0762385                                       |
| 0.119328953                                                | 6.705217922                                 | 28.44991135                                      |
| 0.14146516                                                 | 4.68776255                                  | 19.1884058                                       |
| 0.13308836                                                 | 7.030957092                                 | 24.63308271                                      |
| 0.123750164                                                | 6.68437712                                  | 28.38564103                                      |
| 0.147424112                                                | 5.444110738                                 | 20.07639061                                      |
| 0.120518853                                                | 6.86951507                                  | 29.13765182                                      |
| 0.103784228                                                | 8.544335882                                 | 34.4381068                                       |
| 0.113922676                                                | 10.49551974                                 | 34.57739073                                      |
| 0.105352262                                                | 8.763088873                                 | 33.26727067                                      |
| 0.132404999                                                | 6.686283157                                 | 24.86516854                                      |
| 0.140393765                                                | 5.145828629                                 | 20.16496804                                      |
| 0.118569811                                                | 7.848295123                                 | 29.75482094                                      |
| 0.137628585                                                | 4.779580195                                 | 23.32405063                                      |
| 0.104141027                                                | 10.91484973                                 | 38.39720352                                      |
| 0.08220459                                                 | 14.66645339                                 | 62.51380368                                      |
| 0.132276275                                                | 6.168895078                                 | 23.81696                                         |
| 0.132593035                                                | 7.116295032                                 | 24.09373399                                      |
| 0.109196462                                                | 8.340354667                                 | 34.95997239                                      |
| 0.118996611                                                | 7.49524624                                  | 27.90839107                                      |
| 0.12308866                                                 | 6.917422531                                 | 27.04801865                                      |
| 0.126422622                                                | 6.154675124                                 | 25.90039491                                      |
| 0.141533125                                                | 4.699590698                                 | 20.42806552                                      |
| 0.135562499                                                | 7.189179898                                 | 24.7777068                                       |
| 0.121135125                                                | 6.497378071                                 | 26.78092399                                      |
| 0.107064222                                                | 8.457895184                                 | 33.65025042                                      |
| 0.097412843                                                | 11.60905418                                 | 41.80167015                                      |
| 0.124768648                                                | 6.21893722                                  | 27.05038079                                      |
| 0.156995687                                                | 4.264219498                                 | 16.99315947                                      |
| 0.162844615                                                | 5.83771831                                  | 18.47611865                                      |
| 0.100317915                                                | 9.543472518                                 | 37.64702613                                      |
| 0.126733226                                                | 5.844851582                                 | 24.92964209                                      |
| 0.124502387                                                | 6.12751033                                  | 27.3690205                                       |
| 0.137128805                                                | 6.543380333                                 | 22.99589996                                      |
| 0.097382046                                                | 11.16926116                                 | 43.87989556                                      |
| 0.135403399                                                | 5.5893436                                   | 22.44234801                                      |
| 0.126354713                                                | 7.517696198                                 | 26.11889132                                      |
| 0.123236361                                                | 6.747041939                                 | 26.86202186                                      |
| 0.119974638                                                | 7.033500991                                 | 28.55851852                                      |
| 0.084633407                                                | 15.3537652                                  | 51.6303681                                       |
| 0.156018304                                                | 5.027117036                                 | 18.60117548                                      |
| 0.122611586                                                | 7.011955819                                 | 27.58884816                                      |
| 0.133778329                                                | 6.010285032                                 | 23.46242424                                      |
| 0.130190628                                                | 5.802497837                                 | 25.39613971                                      |
| 0.114597128                                                | 9.509661246                                 | 30.96317943                                      |
| 0.136349883                                                | 5.778646029                                 | 24.4029109                                       |
| 0.088359975                                                | 14.24673215                                 | 47.03247373                                      |
| 0.113721972                                                | 6.927120174                                 | 35.91127098                                      |
| 0.132042292                                                | 6.200100327                                 | 24.18392795                                      |



| log.sigma.5.0.mm.3D_gldm_LargeDependenceLowGrayLevelEmphasis | log.sigma.5.0.mm.3D_gldm_SmallDependenceHighGrayLevelEmphasis | log.sigma.5.0.mm.3D_gldm_LargeDependenceHighGrayLevelEmphasis |
|--------------------------------------------------------------|---------------------------------------------------------------|---------------------------------------------------------------|
| 0.046903516                                                  | 101.2456502                                                   | 9458.080584                                                   |
| 0.611607296                                                  | 15.24165093                                                   | 2174.581818                                                   |
| 0.177645564                                                  | 34.90890446                                                   | 4710.071056                                                   |
| 0.312897041                                                  | 52.13803313                                                   | 6195.525077                                                   |
| 0.279819824                                                  | 22.47925078                                                   | 4397.461149                                                   |
| 1.038927255                                                  | 22.8887163                                                    | 2172.809091                                                   |
| 0.142295823                                                  | 47.02144834                                                   | 4645.643249                                                   |
| 0.064727365                                                  | 88.90718787                                                   | 14151.59064                                                   |
| 0.122499736                                                  | 51.43099614                                                   | 7355.6641                                                     |
| 0.054678745                                                  | 86.94374272                                                   | 8458.833955                                                   |
| 0.278034913                                                  | 21.17592848                                                   | 3773.69496                                                    |
| 0.148529479                                                  | 40.84688477                                                   | 5696.437744                                                   |
| 0.261689396                                                  | 29.9707429                                                    | 9173.137654                                                   |
| 0.120030627                                                  | 60.02273725                                                   | 9558.199767                                                   |
| 0.139277867                                                  | 41.48925799                                                   | 4874.963206                                                   |
| 0.088949666                                                  | 58.95813473                                                   | 6109.747715                                                   |
| 0.12749739                                                   | 32.97913038                                                   | 5653.436348                                                   |
| 0.881162335                                                  | 15.73594231                                                   | 2985.54339                                                    |
| 1.682759398                                                  | 7.755749511                                                   | 1831.378274                                                   |
| 0.110710991                                                  | 55.93812324                                                   | 5651.573572                                                   |
| 0.321631265                                                  | 24.36461298                                                   | 6326.529762                                                   |
| 0.692704233                                                  | 15.15861068                                                   | 2347.940686                                                   |
| 0.576045565                                                  | 18.78230056                                                   | 2980.780273                                                   |
| 0.196272325                                                  | 33.16055759                                                   | 5559.592369                                                   |
| 0.067842794                                                  | 61.7681509                                                    | 6406.958366                                                   |
| 0.062186382                                                  | 88.58092549                                                   | 8975.141832                                                   |
| 0.062369547                                                  | 112.5461192                                                   | 13862.59821                                                   |
| 0.16848453                                                   | 38.6914905                                                    | 7134.308834                                                   |
| 1.289339369                                                  | 12.03274712                                                   | 1546.051454                                                   |
| 0.248320664                                                  | 21.81687211                                                   | 6074.648004                                                   |
| 0.11148409                                                   | 51.57161556                                                   | 8913.620849                                                   |
| 0.18426489                                                   | 24.17432958                                                   | 12799.01498                                                   |
| 0.095846371                                                  | 62.38500701                                                   | 7197.40415                                                    |
| 0.057815723                                                  | 79.65800467                                                   | 8418.924255                                                   |
| 0.065244978                                                  | 72.60326269                                                   | 7917.594687                                                   |
| 0.11849669                                                   | 43.3446473                                                    | 8098.59053                                                    |
| 0.074408812                                                  | 88.63864583                                                   | 24662.60575                                                   |
| 0.110831944                                                  | 87.54200505                                                   | 15252.71517                                                   |
| 1.174452604                                                  | 3.48249598                                                    | 2081.109756                                                   |
| 0.142766758                                                  | 59.84989267                                                   | 5120.133425                                                   |
| 0.09501243                                                   | 51.69485991                                                   | 14551.54973                                                   |
| 0.076282157                                                  | 78.46994181                                                   | 5315.802948                                                   |
| 0.065726162                                                  | 69.96322965                                                   | 6167.25568                                                    |
| 0.165672004                                                  | 35.20137087                                                   | 5124.788585                                                   |
| 0.392206887                                                  | 25.1938659                                                    | 2683.453834                                                   |
| 0.097538044                                                  | 74.09555577                                                   | 8143.656831                                                   |
| 0.136874959                                                  | 39.51799114                                                   | 6502.071898                                                   |
| 2.335534657                                                  | 6.876217973                                                   | 1129.04248                                                    |
| 0.279339567                                                  | 33.19513117                                                   | 3918.797885                                                   |
| 0.747154248                                                  | 15.3939993                                                    | 2852.506657                                                   |
| 0.137905003                                                  | 49.69871058                                                   | 5138.945504                                                   |
| 0.101706503                                                  | 57.62714971                                                   | 4045.714328                                                   |
| 0.205884219                                                  | 30.32112982                                                   | 5250.218307                                                   |
| 0.140172326                                                  | 38.67660449                                                   | 3580.986413                                                   |
| 0.490945284                                                  | 24.82216543                                                   | 2712.494737                                                   |
| 0.121374371                                                  | 40.41490697                                                   | 7859.262564                                                   |
| 0.103268386                                                  | 60.11158933                                                   | 5766.036836                                                   |
| 0.079358654                                                  | 59.05782752                                                   | 14421.56854                                                   |
| 0.169387003                                                  | 28.55948692                                                   | 7748.612257                                                   |
| 0.169453325                                                  | 45.97309987                                                   | 9303.424691                                                   |
| 0.300937612                                                  | 33.75624508                                                   | 4568.549264                                                   |
| 0.148179663                                                  | 47.66721684                                                   | 6381.039326                                                   |
| 0.034283558                                                  | 136.475457                                                    | 13396.6464                                                    |
| 0.126360696                                                  | 58.48125938                                                   | 8405.006428                                                   |
| 0.17027385                                                   | 27.92865017                                                   | 3950.477215                                                   |
| 0.12432068                                                   | 57.73415797                                                   | 13430.26178                                                   |
| 0.546127222                                                  | 9.745950097                                                   | 7972.812117                                                   |
| 0.069915768                                                  | 82.09245801                                                   | 10233.7792                                                    |
| 0.081609625                                                  | 60.43954027                                                   | 8606.877412                                                   |
| 0.269646704                                                  | 22.46010338                                                   | 5730.873016                                                   |
| 0.12610253                                                   | 51.53342998                                                   | 8336.180908                                                   |
| 0.076782433                                                  | 74.60798959                                                   | 11102.35501                                                   |
| 0.08142408                                                   | 56.37814773                                                   | 10062.19658                                                   |
| 0.110890461                                                  | 43.80639877                                                   | 5522.330235                                                   |
| 0.189555701                                                  | 50.35650632                                                   | 5378.100607                                                   |
| 0.113841224                                                  | 39.36724799                                                   | 7566.552906                                                   |
| 0.202707369                                                  | 28.15007515                                                   | 6889.486227                                                   |
| 0.848385016                                                  | 18.78325968                                                   | 3098.73382                                                    |
| 0.250999792                                                  | 25.45191093                                                   | 4174.069127                                                   |
| 0.077690198                                                  | 117.9226891                                                   | 11133.09833                                                   |
| 0.041518902                                                  | 126.5076878                                                   | 11087.04827                                                   |
| 0.126800072                                                  | 44.79413415                                                   | 13329.31017                                                   |
| 0.099873235                                                  | 50.13468078                                                   | 7926.446926                                                   |
| 0.113211769                                                  | 44.17352364                                                   | 9669.513179                                                   |
| 0.100838176                                                  | 76.37616309                                                   | 8957.238622                                                   |
| 0.546621755                                                  | 17.6767385                                                    | 4765.347258                                                   |
| 0.148815818                                                  | 52.9412096                                                    | 7337.726625                                                   |
| 0.097586094                                                  | 66.81967923                                                   | 8404.005835                                                   |
| 0.345218414                                                  | 21.93146214                                                   | 3306.913934                                                   |
| 0.204891199                                                  | 30.75091144                                                   | 5777.959506                                                   |
| 1.054914062                                                  | 19.5835176                                                    | 3968.007669                                                   |
| 0.159715892                                                  | 51.2060129                                                    | 4125.337112                                                   |
| 0.076264522                                                  | 65.81473323                                                   | 12053.50473                                                   |
| 0.136811959                                                  | 39.50188907                                                   | 5085.346364                                                   |
| 0.165161632                                                  | 30.99298934                                                   | 5443.506434                                                   |
| 0.061654262                                                  | 122.4744698                                                   | 17916.6578                                                    |
| 0.186824406                                                  | 39.11609116                                                   | 6185.397586                                                   |
| 0.166974055                                                  | 56.95392511                                                   | 20471.07354                                                   |
| 0.479803147                                                  | 8.206255482                                                   | 3669.26259                                                    |
| 0.149940294                                                  | 41.51271777                                                   | 5199.836682                                                   |

| log.sigma.5.0.mm.3D_gldm_SmallDependenceLowGrayLevelEmphasis | log.sigma.5.0.mm.3D_gldm_LowGrayLevelEmphasis | log.sigma.5.0.mm.3D_gldm_DistanceZoneVariabilityNormalized |
|--------------------------------------------------------------|-----------------------------------------------|------------------------------------------------------------|
| 0.001630981                                                  | 0.004056878                                   | 0.993630638                                                |
| 0.003860428                                                  | 0.02116978                                    | 1                                                          |
| 0.003134029                                                  | 0.009272685                                   | 1                                                          |
| 0.003171135                                                  | 0.01698085                                    | 1                                                          |
| 0.002056113                                                  | 0.010492619                                   | 1                                                          |
| 0.007479799                                                  | 0.029325724                                   | 1                                                          |
| 0.001531123                                                  | 0.006782903                                   | 0.99669149                                                 |
| 0.000556787                                                  | 0.002775738                                   | 1                                                          |
| 0.001313362                                                  | 0.005322974                                   | 1                                                          |
| 0.001837571                                                  | 0.003964074                                   | 1                                                          |
| 0.002388855                                                  | 0.013468492                                   | 1                                                          |
| 0.001646879                                                  | 0.006783906                                   | 1                                                          |
| 0.001387145                                                  | 0.008862727                                   | 1                                                          |
| 0.001113454                                                  | 0.005627589                                   | 1                                                          |
| 0.00242741                                                   | 0.008593974                                   | 1                                                          |
| 0.001178738                                                  | 0.00519264                                    | 1                                                          |
| 0.002184457                                                  | 0.009775764                                   | 1                                                          |
| 0.005391054                                                  | 0.021903889                                   | 1                                                          |
| 0.005885011                                                  | 0.044647347                                   | 1                                                          |
| 0.001322149                                                  | 0.00564937                                    | 1                                                          |
| 0.001134607                                                  | 0.009153089                                   | 1                                                          |
| 0.004973403                                                  | 0.026577008                                   | 1                                                          |
| 0.003378208                                                  | 0.020243839                                   | 1                                                          |
| 0.00203353                                                   | 0.007594239                                   | 1                                                          |
| 0.002053656                                                  | 0.004804244                                   | 1                                                          |
| 0.00145652                                                   | 0.004294683                                   | 1                                                          |
| 0.001023244                                                  | 0.00327356                                    | 1                                                          |
| 0.001436003                                                  | 0.005994927                                   | 1                                                          |
| 0.005945767                                                  | 0.033363825                                   | 1                                                          |
| 0.001466779                                                  | 0.00759146                                    | 1                                                          |
| 0.000941553                                                  | 0.004523985                                   | 1                                                          |
| 0.001880548                                                  | 0.00743274                                    | 1                                                          |
| 0.001650749                                                  | 0.006303765                                   | 1                                                          |
| 0.001525057                                                  | 0.004230219                                   | 1                                                          |
| 0.001049644                                                  | 0.003676427                                   | 1                                                          |
| 0.00104196                                                   | 0.005344082                                   | 1                                                          |
| 0.000547643                                                  | 0.003006866                                   | 1                                                          |
| 0.000667537                                                  | 0.003621523                                   | 1                                                          |
| 0.006121639                                                  | 0.038850806                                   | 1                                                          |
| 0.001799586                                                  | 0.008560493                                   | 1                                                          |
| 0.00114868                                                   | 0.004745138                                   | 1                                                          |
| 0.001448886                                                  | 0.0051018                                     | 1                                                          |
| 0.001396687                                                  | 0.004412568                                   | 0.9978022                                                  |
| 0.00206709                                                   | 0.009013972                                   | 1                                                          |
| 0.003090369                                                  | 0.014193486                                   | 1                                                          |
| 0.001360483                                                  | 0.005751045                                   | 0.997126443                                                |
| 0.001092941                                                  | 0.005701198                                   | 1                                                          |
| 0.007694276                                                  | 0.062496237                                   | 1                                                          |
| 0.003009624                                                  | 0.011729268                                   | 1                                                          |
| 0.005884475                                                  | 0.020251334                                   | 1                                                          |
| 0.001903977                                                  | 0.009399543                                   | 1                                                          |
| 0.002434948                                                  | 0.007514512                                   | 1                                                          |
| 0.001844923                                                  | 0.008519047                                   | 1                                                          |
| 0.00341776                                                   | 0.009364943                                   | 1                                                          |
| 0.004125938                                                  | 0.01832546                                    | 1                                                          |
| 0.001027896                                                  | 0.005511192                                   | 1                                                          |
| 0.001742242                                                  | 0.006358171                                   | 0.998062017                                                |
| 0.000964803                                                  | 0.003884987                                   | 1                                                          |
| 0.00262815                                                   | 0.00695168                                    | 1                                                          |
| 0.001010431                                                  | 0.005438531                                   | 0.997389038                                                |
| 0.00252478                                                   | 0.009495203                                   | 1                                                          |
| 0.001332901                                                  | 0.006768656                                   | 1                                                          |
| 0.000673822                                                  | 0.002066527                                   | 0.995798338                                                |
| 0.000714889                                                  | 0.004419143                                   | 0.998481398                                                |
| 0.002741882                                                  | 0.008783568                                   | 1                                                          |
| 0.000750231                                                  | 0.003889182                                   | 0.996587041                                                |
| 0.001709935                                                  | 0.010592558                                   | 1                                                          |
| 0.000853675                                                  | 0.003503937                                   | 0.993916406                                                |
| 0.001596724                                                  | 0.004828979                                   | 1                                                          |
| 0.001801446                                                  | 0.008423019                                   | 1                                                          |
| 0.002034652                                                  | 0.006606756                                   | 1                                                          |
| 0.000868182                                                  | 0.003347177                                   | 0.997503125                                                |
| 0.001093387                                                  | 0.004703945                                   | 1                                                          |
| 0.002429489                                                  | 0.008657619                                   | 1                                                          |
| 0.001989956                                                  | 0.00872078                                    | 1                                                          |
| 0.002122404                                                  | 0.006305151                                   | 1                                                          |
| 0.001947173                                                  | 0.00755249                                    | 1                                                          |
| 0.002441397                                                  | 0.02003441                                    | 1                                                          |
| 0.00202809                                                   | 0.010177115                                   | 1                                                          |
| 0.001168963                                                  | 0.005796031                                   | 1                                                          |
| 0.001584384                                                  | 0.003882843                                   | 1                                                          |
| 0.00127413                                                   | 0.005278948                                   | 1                                                          |
| 0.001724826                                                  | 0.005529649                                   | 1                                                          |
| 0.00090184                                                   | 0.005728812                                   | 1                                                          |
| 0.001086923                                                  | 0.006065528                                   | 0.99667775                                                 |
| 0.002042329                                                  | 0.012558008                                   | 1                                                          |
| 0.001554996                                                  | 0.008027158                                   | 1                                                          |
| 0.001092601                                                  | 0.004406451                                   | 1                                                          |
| 0.002736048                                                  | 0.014277012                                   | 1                                                          |
| 0.003992809                                                  | 0.012668669                                   | 1                                                          |
| 0.002220635                                                  | 0.015676896                                   | 1                                                          |
| 0.002201079                                                  | 0.009909658                                   | 0.993836731                                                |
| 0.000919928                                                  | 0.003857005                                   | 1                                                          |
| 0.001673742                                                  | 0.007142995                                   | 1                                                          |
| 0.001489563                                                  | 0.008360911                                   | 1                                                          |
| 0.000821624                                                  | 0.002603446                                   | 1                                                          |
| 0.001888742                                                  | 0.009138022                                   | 1                                                          |
| 0.001145546                                                  | 0.007654246                                   | 1                                                          |
| 0.003174504                                                  | 0.016448814                                   | 1                                                          |
| 0.00149955                                                   | 0.006077723                                   | 0.998225379                                                |

| log.sigma.5.0.mm.3D_gldzm_LowIntensityEmphasis | log.sigma.5.0.mm.3D_gldzm_LargeDistanceEmphasis | log.sigma.5.0.mm.3D_gldzm_HighIntensitySmallDistanceEmphasis |
|------------------------------------------------|-------------------------------------------------|--------------------------------------------------------------|
| 0.006518132                                    | 1.009584665                                     | 423.2739617                                                  |
| 0.026868413                                    | 1                                               | 110.4333333                                                  |
| 0.016826212                                    | 1                                               | 192.013245                                                   |
| 0.016648607                                    | 1                                               | 230.7345455                                                  |
| 0.014778333                                    | 1                                               | 163.33687                                                    |
| 0.032223026                                    | 1                                               | 112.6728395                                                  |
| 0.0081851                                      | 1.004971002                                     | 252.5468103                                                  |
| 0.004064402                                    | 1                                               | 548.9458288                                                  |
| 0.007839232                                    | 1                                               | 289.4647577                                                  |
| 0.007468114                                    | 1                                               | 405.6099291                                                  |
| 0.016754306                                    | 1                                               | 136.9897959                                                  |
| 0.009772062                                    | 1                                               | 242.6935123                                                  |
| 0.01481116                                     | 1                                               | 252.6434109                                                  |
| 0.008580397                                    | 1                                               | 352.7294833                                                  |
| 0.012468432                                    | 1                                               | 214.3333333                                                  |
| 0.006658936                                    | 1                                               | 325.9460727                                                  |
| 0.01588996                                     | 1                                               | 193.7541667                                                  |
| 0.035546675                                    | 1                                               | 112.0357143                                                  |
| 0.05501485                                     | 1                                               | 67.67021277                                                  |
| 0.007134007                                    | 1                                               | 305.297989                                                   |
| 0.011148949                                    | 1                                               | 189.98                                                       |
| 0.035560861                                    | 1                                               | 104.4248705                                                  |
| 0.02371194                                     | 1                                               | 138.6069364                                                  |
| 0.011678142                                    | 1                                               | 198.805293                                                   |
| 0.008527944                                    | 1                                               | 293.4518072                                                  |
| 0.006406438                                    | 1                                               | 418.2660099                                                  |
| 0.005309722                                    | 1                                               | 562.1850829                                                  |
| 0.009241459                                    | 1                                               | 251.434322                                                   |
| 0.039466816                                    | 1                                               | 85.62068966                                                  |
| 0.012590809                                    | 1                                               | 192.4341085                                                  |
| 0.006620773                                    | 1                                               | 318.7703524                                                  |
| 0.020896557                                    | 1                                               | 202.1308017                                                  |
| 0.009022028                                    | 1                                               | 305.687915                                                   |
| 0.00720588                                     | 1                                               | 381.8517179                                                  |
| 0.00530223                                     | 1                                               | 373.4803719                                                  |
| 0.00798732                                     | 1                                               | 277.7945736                                                  |
| 0.005288727                                    | 1                                               | 601.1372213                                                  |
| 0.004749145                                    | 1                                               | 500.6767068                                                  |
| 0.088695993                                    | 1                                               | 40.36363636                                                  |
| 0.009758076                                    | 1                                               | 295.7959528                                                  |
| 0.008827017                                    | 1                                               | 318.845815                                                   |
| 0.006284702                                    | 1                                               | 353.0939279                                                  |
| 0.006431545                                    | 1.00330033                                      | 335.2475248                                                  |
| 0.012654124                                    | 1                                               | 198.4980469                                                  |
| 0.016959239                                    | 1                                               | 156.1732283                                                  |
| 0.007336889                                    | 1.004316547                                     | 330.3971223                                                  |
| 0.007550031                                    | 1                                               | 258.6121212                                                  |
| 0.07393346                                     | 1                                               | 56                                                           |
| 0.016858224                                    | 1                                               | 207.637931                                                   |
| 0.033882017                                    | 1                                               | 102.0769231                                                  |
| 0.011328162                                    | 1                                               | 253.9715719                                                  |
| 0.009911009                                    | 1                                               | 249.3803109                                                  |
| 0.012723884                                    | 1                                               | 198.8013605                                                  |
| 0.015157853                                    | 1                                               | 179.7714286                                                  |
| 0.021566197                                    | 1                                               | 132.730897                                                   |
| 0.00860757                                     | 1                                               | 290.8044164                                                  |
| 0.008396894                                    | 1.002909796                                     | 284.7005335                                                  |
| 0.007590453                                    | 1                                               | 404.1299435                                                  |
| 0.017416658                                    | 1                                               | 187.3207547                                                  |
| 0.007478838                                    | 1.003921569                                     | 295.2498366                                                  |
| 0.014593463                                    | 1                                               | 214.326284                                                   |
| 0.008782505                                    | 1                                               | 274.9186691                                                  |
| 0.003042296                                    | 1.006315789                                     | 640.9026316                                                  |
| 0.005068077                                    | 1.002279635                                     | 393.5503419                                                  |
| 0.015876941                                    | 1                                               | 177.262069                                                   |
| 0.006525711                                    | 1.005128205                                     | 419.4482906                                                  |
| 0.024581707                                    | 1                                               | 132.2169811                                                  |
| 0.004802255                                    | 1.009153318                                     | 449.1880244                                                  |
| 0.007946745                                    | 1                                               | 287.746927                                                   |
| 0.014490846                                    | 1                                               | 183.3925                                                     |
| 0.011761056                                    | 1                                               | 302.9325843                                                  |
| 0.005343453                                    | 1.00375                                         | 456.3625                                                     |
| 0.008382187                                    | 1                                               | 352.2904762                                                  |
| 0.014264658                                    | 1                                               | 228.4296875                                                  |
| 0.010417609                                    | 1                                               | 274.7356322                                                  |
| 0.012135675                                    | 1                                               | 237.7471698                                                  |
| 0.013579671                                    | 1                                               | 184.2971576                                                  |
| 0.021406456                                    | 1                                               | 157.8783784                                                  |
| 0.013897838                                    | 1                                               | 172.3611111                                                  |
| 0.006670705                                    | 1                                               | 498.6                                                        |
| 0.006186121                                    | 1                                               | 507.4104235                                                  |
| 0.011175826                                    | 1                                               | 327.6438849                                                  |
| 0.010386818                                    | 1                                               | 298.9353234                                                  |
| 0.008247578                                    | 1                                               | 310.4425532                                                  |
| 0.007089937                                    | 1.004991681                                     | 373.0203827                                                  |
| 0.020585184                                    | 1                                               | 158.7878788                                                  |
| 0.010073119                                    | 1                                               | 281.0056926                                                  |
| 0.006243892                                    | 1                                               | 352.5050676                                                  |
| 0.018705546                                    | 1                                               | 137.9446494                                                  |
| 0.028201064                                    | 1                                               | 202.0393258                                                  |
| 0.015708785                                    | 1                                               | 144.265                                                      |
| 0.011029342                                    | 1.00927357                                      | 236.0823029                                                  |
| 0.006347679                                    | 1                                               | 413.0730453                                                  |
| 0.010148461                                    | 1                                               | 217.0898204                                                  |
| 0.012298237                                    | 1                                               | 203.648834                                                   |
| 0.004522839                                    | 1                                               | 656.292887                                                   |
| 0.012299482                                    | 1                                               | 251.0573123                                                  |
| 0.012708675                                    | 1                                               | 351.1208791                                                  |
| 0.036600111                                    | 1                                               | 94.7721519                                                   |
| 0.008331113                                    | 1.002664298                                     | 239.8696714                                                  |

| log.sigma.5.0.mm.3D_gldzm_LowIntensityLargeDistanceEmphasis | log.sigma.5.0.mm.3D_gldzm_HighIntensityEmphasis | log.sigma.5.0.mm.3D_gldzm_DistanceZoneVariability | log.sigma.5.0.mm.3D_gldzm_ZonePercentage |
|-------------------------------------------------------------|-------------------------------------------------|---------------------------------------------------|------------------------------------------|
| 0.006557356                                                 | 426.0047923                                     | 622.0127796                                       | 0.295004713                              |
| 0.026868413                                                 | 110.4333333                                     | 150                                               | 0.160427807                              |
| 0.016826212                                                 | 192.013245                                      | 302                                               | 0.196870926                              |
| 0.016648607                                                 | 230.7345455                                     | 275                                               | 0.2814739                                |
| 0.014778333                                                 | 163.33687                                       | 377                                               | 0.159206081                              |
| 0.032223026                                                 | 112.6728395                                     | 162                                               | 0.245454545                              |
| 0.008241197                                                 | 252.6760563                                     | 1203.006628                                       | 0.213590515                              |
| 0.004064402                                                 | 548.9458288                                     | 923                                               | 0.180696946                              |
| 0.007839232                                                 | 289.4647577                                     | 908                                               | 0.199736032                              |
| 0.007468114                                                 | 405.6099291                                     | 282                                               | 0.263059701                              |
| 0.016754306                                                 | 136.9897959                                     | 294                                               | 0.194960212                              |
| 0.009772062                                                 | 242.6935123                                     | 447                                               | 0.193926247                              |
| 0.014811116                                                 | 252.6434109                                     | 258                                               | 0.138189609                              |
| 0.008580397                                                 | 352.7294833                                     | 329                                               | 0.191613279                              |
| 0.012468432                                                 | 214.3333333                                     | 465                                               | 0.234375                                 |
| 0.006658936                                                 | 325.9460727                                     | 853                                               | 0.194926874                              |
| 0.01588996                                                  | 193.7541667                                     | 240                                               | 0.201005025                              |
| 0.035546675                                                 | 112.0357143                                     | 196                                               | 0.158961882                              |
| 0.05501485                                                  | 67.67021277                                     | 188                                               | 0.144838213                              |
| 0.007134007                                                 | 305.297989                                      | 1094                                              | 0.210425082                              |
| 0.011148949                                                 | 189.98                                          | 400                                               | 0.132275132                              |
| 0.035560861                                                 | 104.4248705                                     | 193                                               | 0.178869323                              |
| 0.02371194                                                  | 138.6069364                                     | 173                                               | 0.168945313                              |
| 0.011678142                                                 | 198.805293                                      | 529                                               | 0.199848886                              |
| 0.008527944                                                 | 293.4518072                                     | 332                                               | 0.260801257                              |
| 0.006406438                                                 | 418.2660099                                     | 609                                               | 0.257070494                              |
| 0.005309722                                                 | 562.1850829                                     | 724                                               | 0.23940612                               |
| 0.009241459                                                 | 251.434322                                      | 472                                               | 0.170890659                              |
| 0.039466816                                                 | 85.62068966                                     | 87                                                | 0.194630872                              |
| 0.012590809                                                 | 192.4341085                                     | 258                                               | 0.125608569                              |
| 0.006620773                                                 | 318.7703524                                     | 823                                               | 0.172971837                              |
| 0.020896557                                                 | 202.1308017                                     | 237                                               | 0.114548091                              |
| 0.009022028                                                 | 305.687915                                      | 753                                               | 0.233199133                              |
| 0.00720588                                                  | 381.8517179                                     | 553                                               | 0.235319149                              |
| 0.00530223                                                  | 373.4803719                                     | 968                                               | 0.219800182                              |
| 0.00798732                                                  | 277.7945736                                     | 516                                               | 0.172057352                              |
| 0.005288727                                                 | 601.1372213                                     | 583                                               | 0.156678312                              |
| 0.004749145                                                 | 500.6767068                                     | 996                                               | 0.192985855                              |
| 0.088695993                                                 | 40.36363636                                     | 99                                                | 0.080487805                              |
| 0.009758076                                                 | 295.7959528                                     | 1779                                              | 0.244704264                              |
| 0.008827017                                                 | 318.845815                                      | 454                                               | 0.175019275                              |
| 0.006284702                                                 | 353.0939279                                     | 1054                                              | 0.27256271                               |
| 0.006448383                                                 | 335.4092409                                     | 907.0022002                                       | 0.248836573                              |
| 0.012654124                                                 | 198.4980469                                     | 512                                               | 0.205787781                              |
| 0.016959239                                                 | 156.1732283                                     | 254                                               | 0.198748044                              |
| 0.00735375                                                  | 330.6733813                                     | 693.0028777                                       | 0.253187614                              |
| 0.007550031                                                 | 258.6121212                                     | 825                                               | 0.180841736                              |
| 0.07393346                                                  | 56                                              | 115                                               | 0.132032147                              |
| 0.016858224                                                 | 207.637931                                      | 174                                               | 0.204465335                              |
| 0.033882017                                                 | 102.0769231                                     | 247                                               | 0.182692308                              |
| 0.011328162                                                 | 253.9715719                                     | 598                                               | 0.232775399                              |
| 0.009911009                                                 | 249.3803109                                     | 965                                               | 0.286265203                              |
| 0.012723884                                                 | 198.8013605                                     | 735                                               | 0.162898936                              |
| 0.015157853                                                 | 179.7714286                                     | 280                                               | 0.253623188                              |
| 0.021566197                                                 | 132.730897                                      | 301                                               | 0.226315789                              |
| 0.00860757                                                  | 290.8044164                                     | 317                                               | 0.162564103                              |
| 0.008406962                                                 | 284.9107662                                     | 1029.00194                                        | 0.254882571                              |
| 0.007590453                                                 | 404.1299435                                     | 531                                               | 0.153556969                              |
| 0.017416658                                                 | 187.3207547                                     | 265                                               | 0.160800971                              |
| 0.007493341                                                 | 295.6640523                                     | 1526.0052229                                      | 0.167597765                              |
| 0.014593463                                                 | 214.326284                                      | 331                                               | 0.187429219                              |
| 0.008782505                                                 | 274.9186691                                     | 541                                               | 0.202621723                              |
| 0.003060925                                                 | 641.7347368                                     | 1419.012632                                       | 0.246156504                              |
| 0.005078209                                                 | 393.6785714                                     | 1314.00152                                        | 0.172635445                              |
| 0.015876941                                                 | 177.262069                                      | 145                                               | 0.183544304                              |
| 0.006529898                                                 | 421.0188034                                     | 583.0034188                                       | 0.151475919                              |
| 0.024581707                                                 | 132.2169811                                     | 106                                               | 0.081288344                              |
| 0.004814517                                                 | 450.9260107                                     | 1303.024409                                       | 0.20976                                  |
| 0.007946745                                                 | 287.746927                                      | 1383                                              | 0.23612771                               |
| 0.014490846                                                 | 183.3925                                        | 400                                               | 0.138026225                              |
| 0.011761056                                                 | 302.9325843                                     | 267                                               | 0.205542725                              |
| 0.005351201                                                 | 456.81625                                       | 798.0025                                          | 0.186480186                              |
| 0.008382187                                                 | 352.2904762                                     | 420                                               | 0.184291356                              |
| 0.014264658                                                 | 228.4296875                                     | 512                                               | 0.22664896                               |
| 0.010417609                                                 | 274.7356322                                     | 696                                               | 0.222293197                              |
| 0.012135675                                                 | 237.7471698                                     | 265                                               | 0.197466468                              |
| 0.013579671                                                 | 184.2971576                                     | 387                                               | 0.161519199                              |
| 0.021406456                                                 | 157.8783784                                     | 148                                               | 0.154488518                              |
| 0.013897838                                                 | 172.3611111                                     | 288                                               | 0.168717047                              |
| 0.006670705                                                 | 498.6                                           | 640                                               | 0.273621206                              |
| 0.006186121                                                 | 507.4104235                                     | 614                                               | 0.308697838                              |
| 0.011175826                                                 | 327.6438849                                     | 278                                               | 0.154530295                              |
| 0.010386818                                                 | 298.9353234                                     | 603                                               | 0.18446008                               |
| 0.008247578                                                 | 310.4425532                                     | 470                                               | 0.152945005                              |
| 0.007103765                                                 | 373.4708819                                     | 599.0033278                                       | 0.246412464                              |
| 0.020585184                                                 | 158.7878788                                     | 165                                               | 0.10770235                               |
| 0.010073119                                                 | 281.0056926                                     | 527                                               | 0.220964361                              |
| 0.006243892                                                 | 352.5050676                                     | 592                                               | 0.215900802                              |
| 0.018705546                                                 | 137.9446494                                     | 271                                               | 0.18510929                               |
| 0.028201064                                                 | 202.0393258                                     | 356                                               | 0.175802469                              |
| 0.015708785                                                 | 144.265                                         | 200                                               | 0.153374233                              |
| 0.011100897                                                 | 236.5517774                                     | 643.0123648                                       | 0.271620487                              |
| 0.006347679                                                 | 413.0730453                                     | 972                                               | 0.187536176                              |
| 0.010148461                                                 | 217.0898204                                     | 668                                               | 0.202424242                              |
| 0.012298237                                                 | 203.648834                                      | 729                                               | 0.167509191                              |
| 0.004522839                                                 | 656.292887                                      | 717                                               | 0.209526593                              |
| 0.012299482                                                 | 251.0573123                                     | 506                                               | 0.179623713                              |
| 0.012708675                                                 | 351.1208791                                     | 182                                               | 0.17382999                               |
| 0.036600111                                                 | 94.7721519                                      | 79                                                | 0.094724221                              |
| 0.008364006                                                 | 239.9236234                                     | 1124.001776                                       | 0.195012123                              |

| log.sigma.5.0.mm.3D_gldzm_IntensityVariabilityNormalized | log.sigma.5.0.mm.3D_gldzm_LowIntensitySmallDistanceEmphasis | log.sigma.5.0.mm.3D_gldzm_IntensityVariability |
|----------------------------------------------------------|-------------------------------------------------------------|------------------------------------------------|
| 0.046667823                                              | 0.006508326                                                 | 29.21405751                                    |
| 0.076                                                    | 0.026868413                                                 | 11.4                                           |
| 0.058352704                                              | 0.016826212                                                 | 17.62251656                                    |
| 0.050076033                                              | 0.016648607                                                 | 13.77090909                                    |
| 0.067185444                                              | 0.014778333                                                 | 25.32891247                                    |
| 0.074302698                                              | 0.032223026                                                 | 12.03703704                                    |
| 0.057799401                                              | 0.008171076                                                 | 69.76387738                                    |
| 0.04972128                                               | 0.004064402                                                 | 45.89274106                                    |
| 0.054593045                                              | 0.007839232                                                 | 49.57048458                                    |
| 0.060484885                                              | 0.007468114                                                 | 17.05673759                                    |
| 0.073487899                                              | 0.016754306                                                 | 21.60544218                                    |
| 0.062014224                                              | 0.009772062                                                 | 27.72035794                                    |
| 0.049185746                                              | 0.014811116                                                 | 12.68992248                                    |
| 0.047218706                                              | 0.008580397                                                 | 15.53495441                                    |
| 0.054891895                                              | 0.012468432                                                 | 25.52473118                                    |
| 0.054005654                                              | 0.006658936                                                 | 46.06682298                                    |
| 0.064722222                                              | 0.01588996                                                  | 15.53333333                                    |
| 0.068356935                                              | 0.035546675                                                 | 13.39795918                                    |
| 0.089463558                                              | 0.05501485                                                  | 16.81914894                                    |
| 0.050855756                                              | 0.007134007                                                 | 55.63619744                                    |
| 0.0742625                                                | 0.011148949                                                 | 29.705                                         |
| 0.076324197                                              | 0.035560861                                                 | 14.73056995                                    |
| 0.069598049                                              | 0.02371194                                                  | 12.04046243                                    |
| 0.062589113                                              | 0.011678142                                                 | 33.10964083                                    |
| 0.060168384                                              | 0.008527944                                                 | 19.97590361                                    |
| 0.049209854                                              | 0.006406438                                                 | 29.96880131                                    |
| 0.045248161                                              | 0.005309722                                                 | 32.75966851                                    |
| 0.063110457                                              | 0.009241459                                                 | 29.78813559                                    |
| 0.086272955                                              | 0.039466816                                                 | 7.505747126                                    |
| 0.069737396                                              | 0.012590809                                                 | 17.99224806                                    |
| 0.054630763                                              | 0.006620773                                                 | 44.96111786                                    |
| 0.073367872                                              | 0.020896557                                                 | 17.38818565                                    |
| 0.045613033                                              | 0.009022028                                                 | 34.34661355                                    |
| 0.048778813                                              | 0.00720588                                                  | 26.97468354                                    |
| 0.063022932                                              | 0.00530223                                                  | 61.00619835                                    |
| 0.066064239                                              | 0.00798732                                                  | 34.08914729                                    |
| 0.044741077                                              | 0.005288727                                                 | 26.08404803                                    |
| 0.043465025                                              | 0.004749145                                                 | 43.29116466                                    |
| 0.109478625                                              | 0.088695993                                                 | 10.83838384                                    |
| 0.04591921                                               | 0.009758076                                                 | 81.69027544                                    |
| 0.058753323                                              | 0.008827017                                                 | 26.67400881                                    |
| 0.052304585                                              | 0.006284702                                                 | 55.12903226                                    |
| 0.05210213                                               | 0.006427335                                                 | 47.36083608                                    |
| 0.061325073                                              | 0.012654124                                                 | 31.3984375                                     |
| 0.068386137                                              | 0.016959239                                                 | 17.37007874                                    |
| 0.054843952                                              | 0.007332673                                                 | 38.11654676                                    |
| 0.060084481                                              | 0.007550031                                                 | 49.56969697                                    |
| 0.106086957                                              | 0.07393346                                                  | 12.2                                           |
| 0.058924561                                              | 0.016858224                                                 | 10.25287356                                    |
| 0.086495435                                              | 0.033882017                                                 | 21.36437247                                    |
| 0.055519513                                              | 0.011328162                                                 | 33.2006689                                     |
| 0.054608714                                              | 0.009911009                                                 | 52.69740933                                    |
| 0.05668564                                               | 0.012723884                                                 | 41.66394558                                    |
| 0.062984694                                              | 0.015157853                                                 | 17.63571429                                    |
| 0.066544519                                              | 0.021566197                                                 | 20.02990033                                    |
| 0.06746012                                               | 0.00860757                                                  | 21.38485804                                    |
| 0.05179588                                               | 0.008394377                                                 | 53.40155189                                    |
| 0.050010462                                              | 0.007590453                                                 | 26.55555556                                    |
| 0.071014596                                              | 0.017416658                                                 | 18.81886792                                    |
| 0.055640993                                              | 0.007475213                                                 | 85.13071895                                    |
| 0.057328794                                              | 0.014593463                                                 | 18.97583082                                    |
| 0.05967931                                               | 0.008782505                                                 | 32.28650647                                    |
| 0.053080702                                              | 0.003037639                                                 | 75.64                                          |
| 0.053738879                                              | 0.005065545                                                 | 70.72036474                                    |
| 0.072247325                                              | 0.015876941                                                 | 10.47586207                                    |
| 0.049140186                                              | 0.006524665                                                 | 28.74700855                                    |
| 0.078675685                                              | 0.024581707                                                 | 8.339622642                                    |
| 0.04693781                                               | 0.00479919                                                  | 61.53546911                                    |
| 0.051442237                                              | 0.007946745                                                 | 71.14461316                                    |
| 0.072875                                                 | 0.014490846                                                 | 29.15                                          |
| 0.057919174                                              | 0.011761056                                                 | 15.46441948                                    |
| 0.0486125                                                | 0.005341516                                                 | 38.89                                          |
| 0.05314059                                               | 0.008382187                                                 | 22.31904762                                    |
| 0.053817749                                              | 0.014264658                                                 | 27.5546875                                     |
| 0.050349287                                              | 0.010417609                                                 | 35.04310345                                    |
| 0.068422926                                              | 0.012135675                                                 | 18.13207547                                    |
| 0.068285159                                              | 0.013579671                                                 | 26.42635659                                    |
| 0.065467495                                              | 0.021406456                                                 | 9.689189189                                    |
| 0.070577739                                              | 0.013897838                                                 | 20.32638889                                    |
| 0.046191406                                              | 0.006670705                                                 | 29.5625                                        |
| 0.046159641                                              | 0.006186121                                                 | 28.34201954                                    |
| 0.051058434                                              | 0.011175826                                                 | 14.1942446                                     |
| 0.048252381                                              | 0.010386818                                                 | 29.09618574                                    |
| 0.061647804                                              | 0.008247578                                                 | 28.97446809                                    |
| 0.048740175                                              | 0.00708648                                                  | 29.29284526                                    |
| 0.072910927                                              | 0.020585184                                                 | 12.03030303                                    |
| 0.050916541                                              | 0.010073119                                                 | 26.83301708                                    |
| 0.060337153                                              | 0.006243892                                                 | 35.71959459                                    |
| 0.075393854                                              | 0.018705546                                                 | 20.43173432                                    |
| 0.053828431                                              | 0.028201064                                                 | 19.16292135                                    |
| 0.0861                                                   | 0.015708785                                                 | 17.22                                          |
| 0.053278835                                              | 0.011011453                                                 | 34.47140649                                    |
| 0.05466223                                               | 0.006347679                                                 | 53.13168724                                    |
| 0.062031625                                              | 0.010148461                                                 | 41.43712575                                    |
| 0.062447195                                              | 0.012298237                                                 | 45.52400549                                    |
| 0.046484169                                              | 0.004522839                                                 | 33.32914923                                    |
| 0.049235264                                              | 0.012299482                                                 | 24.91304348                                    |
| 0.052650646                                              | 0.012708675                                                 | 9.582417582                                    |
| 0.082839289                                              | 0.036600111                                                 | 6.544303797                                    |
| 0.059363849                                              | 0.008322289                                                 | 66.84369449                                    |

| log.sigma.5.0.mm.3D_gldzm_HighIntensityLargeDistanceEmphasis | log.sigma.5.0.mm.3D_gldzm_SmallDistanceEmphasis | log.sigma.5.0.mm.3D_glcm_SumVariance | log.sigma.5.0.mm.3D_glcm_Homogeneity1 |
|--------------------------------------------------------------|-------------------------------------------------|--------------------------------------|---------------------------------------|
| 426.928115                                                   | 0.997603834                                     | 1449.192469                          | 0.400693067                           |
| 110.4333333                                                  | 1                                               | 221.5502747                          | 0.506501443                           |
| 192.013245                                                   | 1                                               | 593.7513872                          | 0.463408992                           |
| 230.7345455                                                  | 1                                               | 725.1401478                          | 0.438498484                           |
| 163.33687                                                    | 1                                               | 429.3272931                          | 0.491544461                           |
| 112.6728395                                                  | 1                                               | 229.9733128                          | 0.480462954                           |
| 253.1930406                                                  | 0.998757249                                     | 686.4304755                          | 0.443516309                           |
| 548.9458288                                                  | 1                                               | 1695.842164                          | 0.477976168                           |
| 289.4647577                                                  | 1                                               | 923.2355552                          | 0.454699491                           |
| 405.6099291                                                  | 1                                               | 1384.254391                          | 0.428853712                           |
| 136.9897959                                                  | 1                                               | 389.7385416                          | 0.486967226                           |
| 242.6935123                                                  | 1                                               | 716.5544309                          | 0.468658237                           |
| 252.6434109                                                  | 1                                               | 698.9289607                          | 0.522673984                           |
| 352.7294833                                                  | 1                                               | 1111.348997                          | 0.465547286                           |
| 214.3333333                                                  | 1                                               | 643.0113446                          | 0.440658482                           |
| 325.9460727                                                  | 1                                               | 1034.41429                           | 0.416988546                           |
| 193.7541667                                                  | 1                                               | 680.8738061                          | 0.461210469                           |
| 112.0357143                                                  | 1                                               | 246.7372029                          | 0.517511868                           |
| 67.67021277                                                  | 1                                               | 138.2703007                          | 0.527697948                           |
| 305.297989                                                   | 1                                               | 873.644079                           | 0.434678228                           |
| 189.98                                                       | 1                                               | 504.0411496                          | 0.526135784                           |
| 104.4248705                                                  | 1                                               | 267.5161255                          | 0.478128572                           |
| 138.6069364                                                  | 1                                               | 314.7498876                          | 0.498313377                           |
| 198.805293                                                   | 1                                               | 591.0625281                          | 0.488765334                           |
| 293.4518072                                                  | 1                                               | 1023.763066                          | 0.419112133                           |
| 418.2660099                                                  | 1                                               | 1313.401607                          | 0.434072605                           |
| 562.1850829                                                  | 1                                               | 1951.32194                           | 0.436557763                           |
| 251.434322                                                   | 1                                               | 730.297965                           | 0.491303824                           |
| 85.62068966                                                  | 1                                               | 173.8709768                          | 0.50445016                            |
| 192.4341085                                                  | 1                                               | 521.7797251                          | 0.527705162                           |
| 318.7703524                                                  | 1                                               | 1023.624602                          | 0.469891306                           |
| 202.1308017                                                  | 1                                               | 817.1104623                          | 0.538899358                           |
| 305.687915                                                   | 1                                               | 1018.16291                           | 0.430493784                           |
| 381.8517179                                                  | 1                                               | 1284.851621                          | 0.421695136                           |
| 373.4803719                                                  | 1                                               | 1217.540935                          | 0.446630465                           |
| 277.7945736                                                  | 1                                               | 904.936372                           | 0.483893787                           |
| 601.1372213                                                  | 1                                               | 2137.985572                          | 0.503550708                           |
| 500.6767068                                                  | 1                                               | 1599.971071                          | 0.458519773                           |
| 40.36363636                                                  | 1                                               | 106.1472201                          | 0.553896989                           |
| 295.7959528                                                  | 1                                               | 822.1107661                          | 0.420466918                           |
| 318.845815                                                   | 1                                               | 1271.220336                          | 0.481399632                           |
| 353.0939279                                                  | 1                                               | 986.2166387                          | 0.40913954                            |
| 336.0561056                                                  | 0.999174917                                     | 1076.060665                          | 0.412508242                           |
| 198.4980469                                                  | 1                                               | 588.3619025                          | 0.460008031                           |
| 156.1732283                                                  | 1                                               | 331.7279598                          | 0.484060923                           |
| 331.7784173                                                  | 0.998920863                                     | 1134.257067                          | 0.44083623                            |
| 258.6121212                                                  | 1                                               | 754.9515159                          | 0.476969958                           |
| 56                                                           | 1                                               | 107.5681456                          | 0.518220039                           |
| 207.637931                                                   | 1                                               | 449.8127516                          | 0.490830602                           |
| 102.0769231                                                  | 1                                               | 243.8545783                          | 0.509441066                           |
| 253.9715719                                                  | 1                                               | 786.7914232                          | 0.432437934                           |
| 249.3803109                                                  | 1                                               | 720.4701854                          | 0.407404638                           |
| 198.8013605                                                  | 1                                               | 542.1837674                          | 0.490282118                           |
| 179.7714286                                                  | 1                                               | 554.258624                           | 0.428856072                           |
| 132.730897                                                   | 1                                               | 350.8138255                          | 0.455840125                           |
| 290.8044164                                                  | 1                                               | 843.3321243                          | 0.488885849                           |
| 285.7516974                                                  | 0.999272551                                     | 877.5877857                          | 0.423545316                           |
| 404.1299435                                                  | 1                                               | 1510.866256                          | 0.4763785                             |
| 187.3207547                                                  | 1                                               | 674.7552324                          | 0.515720224                           |
| 297.320915                                                   | 0.999019608                                     | 901.6858329                          | 0.482646682                           |
| 214.326284                                                   | 1                                               | 480.3742202                          | 0.506449352                           |
| 274.9186691                                                  | 1                                               | 806.2693547                          | 0.457614293                           |
| 645.0631579                                                  | 0.998421053                                     | 2196.918036                          | 0.432271633                           |
| 394.1914894                                                  | 0.999430091                                     | 975.1927416                          | 0.476004872                           |
| 177.262069                                                   | 1                                               | 494.2969176                          | 0.468098963                           |
| 427.3008547                                                  | 0.998717949                                     | 1225.516608                          | 0.502496943                           |
| 132.2169811                                                  | 1                                               | 374.4927976                          | 0.590670829                           |
| 457.8779558                                                  | 0.99771167                                      | 1358.656005                          | 0.44699039                            |
| 287.746927                                                   | 1                                               | 1105.284053                          | 0.460607491                           |
| 183.3925                                                     | 1                                               | 513.7396782                          | 0.5185682                             |
| 302.9325843                                                  | 1                                               | 971.9329541                          | 0.469539133                           |
| 458.63125                                                    | 0.9990625                                       | 1390.336526                          | 0.467702976                           |
| 352.2904762                                                  | 1                                               | 1213.835332                          | 0.465048613                           |
| 228.4296875                                                  | 1                                               | 723.1009908                          | 0.437524332                           |
| 274.7356322                                                  | 1                                               | 689.2165114                          | 0.442928668                           |
| 237.7471698                                                  | 1                                               | 780.7674004                          | 0.482085448                           |
| 184.2971576                                                  | 1                                               | 618.0219144                          | 0.514666774                           |
| 157.8783784                                                  | 1                                               | 281.6921784                          | 0.526328675                           |
| 172.3611111                                                  | 1                                               | 445.5124597                          | 0.492870462                           |
| 498.6                                                        | 1                                               | 1801.707645                          | 0.404710679                           |
| 507.4104235                                                  | 1                                               | 1753.298962                          | 0.403823567                           |
| 327.6438849                                                  | 1                                               | 1091.109945                          | 0.515119176                           |
| 298.9353234                                                  | 1                                               | 990.5258506                          | 0.464528878                           |
| 310.4425532                                                  | 1                                               | 1053.077536                          | 0.481531445                           |
| 375.2728785                                                  | 0.99875208                                      | 1161.345527                          | 0.434018391                           |
| 158.7878788                                                  | 1                                               | 364.4384012                          | 0.543403772                           |
| 281.0056926                                                  | 1                                               | 938.4300693                          | 0.440081229                           |
| 352.5050676                                                  | 1                                               | 1089.51527                           | 0.458532768                           |
| 137.9446494                                                  | 1                                               | 357.9220701                          | 0.484488391                           |
| 202.0393258                                                  | 1                                               | 593.9696562                          | 0.486000419                           |
| 144.265                                                      | 1                                               | 315.7610058                          | 0.54502924                            |
| 238.4296754                                                  | 0.997681607                                     | 713.9599791                          | 0.42332538                            |
| 413.0730453                                                  | 1                                               | 1339.170031                          | 0.470896929                           |
| 217.0898204                                                  | 1                                               | 649.4198366                          | 0.458985081                           |
| 203.648834                                                   | 1                                               | 593.6248337                          | 0.477484549                           |
| 656.292887                                                   | 1                                               | 2105.984873                          | 0.468378437                           |
| 251.0573123                                                  | 1                                               | 731.4627698                          | 0.470202121                           |
| 351.1208791                                                  | 1                                               | 1327.985985                          | 0.515499512                           |
| 94.7721519                                                   | 1                                               | 253.4855123                          | 0.546737602                           |
| 240.1394316                                                  | 0.999333925                                     | 696.9130082                          | 0.45602247                            |

| log.sigma.5.0.mm.3D_glc_m_Homogeneity2 | log.sigma.5.0.mm.3D_glc_m_ClusterShade | log.sigma.5.0.mm.3D_glc_m_MaximumProbability | log.sigma.5.0.mm.3D_glc_m_Ldmn | log.sigma.5.0.mm.3D_glc_m_SumVariance2 |
|----------------------------------------|----------------------------------------|----------------------------------------------|--------------------------------|----------------------------------------|
| 0.319900835                            | -461.4092186                           | 0.026039921                                  | 0.988748646                    | 105.6793106                            |
| 0.448025632                            | 119.3675253                            | 0.064178163                                  | 0.982603052                    | 38.97825399                            |
| 0.395190902                            | 194.5623619                            | 0.021836457                                  | 0.988210779                    | 77.48465443                            |
| 0.364920477                            | -394.6926212                           | 0.032185647                                  | 0.985502963                    | 100.8516071                            |
| 0.428142137                            | 89.30240944                            | 0.042924745                                  | 0.988616692                    | 48.45264768                            |
| 0.414184587                            | 160.0572433                            | 0.058521573                                  | 0.982444779                    | 57.47866011                            |
| 0.369579128                            | 177.0083783                            | 0.017809154                                  | 0.992657917                    | 72.48315608                            |
| 0.413160399                            | 183.5869884                            | 0.032200691                                  | 0.994162262                    | 73.2338411                             |
| 0.384510901                            | 8.394076092                            | 0.023068211                                  | 0.990647086                    | 74.94402647                            |
| 0.350870554                            | -245.0545908                           | 0.020518546                                  | 0.989787405                    | 63.0871604                             |
| 0.422207395                            | -4.34523076                            | 0.026936306                                  | 0.988418979                    | 46.34440876                            |
| 0.399679261                            | -15.74766881                           | 0.026470173                                  | 0.990725653                    | 69.784443945                           |
| 0.467746762                            | 231.0803584                            | 0.052552781                                  | 0.991907442                    | 65.6658902                             |
| 0.398107371                            | 27.74051849                            | 0.036975439                                  | 0.991875506                    | 70.12114013                            |
| 0.366013224                            | 121.4720236                            | 0.031079031                                  | 0.990399112                    | 68.45770525                            |
| 0.336068555                            | -350.9275187                           | 0.017251186                                  | 0.989485299                    | 81.87606278                            |
| 0.391179454                            | -386.3417076                           | 0.032295432                                  | 0.985359054                    | 50.81517238                            |
| 0.460741991                            | 252.2682083                            | 0.06326705                                   | 0.98368353                     | 51.83814332                            |
| 0.473017654                            | 90.54505064                            | 0.053909095                                  | 0.981737917                    | 37.20953331                            |
| 0.358405663                            | 2.01637266                             | 0.019624678                                  | 0.99182369                     | 84.15201972                            |
| 0.471319116                            | 31.95121661                            | 0.049090603                                  | 0.991259996                    | 40.78760076                            |
| 0.410493108                            | 25.86265778                            | 0.026650351                                  | 0.984505935                    | 47.12368093                            |
| 0.437109747                            | 138.2768163                            | 0.039561546                                  | 0.987429041                    | 61.85564183                            |
| 0.425415888                            | 159.9604653                            | 0.038517979                                  | 0.990946884                    | 48.63588591                            |
| 0.340168598                            | 2.315332533                            | 0.026636492                                  | 0.988542486                    | 47.15666087                            |
| 0.358301584                            | -436.7865728                           | 0.032504519                                  | 0.991462284                    | 74.54672713                            |
| 0.363597357                            | -942.2148033                           | 0.023679403                                  | 0.993825478                    | 102.3679178                            |
| 0.427412122                            | 81.3495027                             | 0.042726333                                  | 0.991465826                    | 51.23723222                            |
| 0.443369391                            | 139.2936801                            | 0.051888769                                  | 0.98106926                     | 43.78785984                            |
| 0.472937658                            | 71.91540015                            | 0.043299928                                  | 0.992724527                    | 39.73724918                            |
| 0.403273277                            | 7.061921314                            | 0.0271043                                    | 0.992259213                    | 63.92010619                            |
| 0.48872118                             | -287.0658135                           | 0.058742586                                  | 0.990152644                    | 32.48063792                            |
| 0.354782589                            | -483.5838693                           | 0.020790183                                  | 0.990933518                    | 104.3201083                            |
| 0.343351384                            | -366.6640888                           | 0.02225268                                   | 0.991734823                    | 81.15171053                            |
| 0.373079224                            | -111.9215378                           | 0.020195331                                  | 0.991922143                    | 60.6341017                             |
| 0.419353841                            | -102.6238803                           | 0.025374778                                  | 0.990669888                    | 50.06836926                            |
| 0.446331295                            | -546.5355663                           | 0.054728529                                  | 0.994634597                    | 63.60462669                            |
| 0.388131797                            | -337.2007441                           | 0.043236016                                  | 0.993050572                    | 128.1959649                            |
| 0.505796328                            | 3.728864839                            | 0.048532075                                  | 0.984528928                    | 15.31963534                            |
| 0.342073251                            | 11.59639933                            | 0.014399464                                  | 0.990531893                    | 108.3288886                            |
| 0.41869788                             | -562.7938527                           | 0.048145582                                  | 0.991232545                    | 55.02475495                            |
| 0.327189961                            | 311.754921                             | 0.018178538                                  | 0.992881532                    | 94.91786247                            |
| 0.333288459                            | 158.125936                             | 0.020770529                                  | 0.988251399                    | 71.83666253                            |
| 0.38961924                             | -56.79506838                           | 0.032573029                                  | 0.992181489                    | 50.93031545                            |
| 0.419818709                            | 303.0934587                            | 0.03678486                                   | 0.987581739                    | 56.08902889                            |
| 0.368648441                            | -323.3502925                           | 0.019547157                                  | 0.990772795                    | 75.13075373                            |
| 0.410560933                            | 92.79867454                            | 0.026110523                                  | 0.991584424                    | 52.66317666                            |
| 0.462067468                            | 79.16586315                            | 0.049269051                                  | 0.976273185                    | 34.05104994                            |
| 0.428023921                            | 301.3168807                            | 0.037030709                                  | 0.990405448                    | 66.7308218                             |
| 0.449160871                            | 81.84794094                            | 0.05736164                                   | 0.988161326                    | 39.40829172                            |
| 0.355199493                            | -63.5758951                            | 0.017378906                                  | 0.98805766                     | 77.70622037                            |
| 0.325955516                            | 105.3672673                            | 0.016650241                                  | 0.986949602                    | 79.5640573                             |
| 0.426745637                            | 150.0128475                            | 0.031576161                                  | 0.991475596                    | 59.5405545                             |
| 0.35264894                             | 8.279732164                            | 0.022794451                                  | 0.981700318                    | 45.17867134                            |
| 0.385833365                            | 129.7447842                            | 0.031790841                                  | 0.983782953                    | 69.39271271                            |
| 0.424463609                            | 3.632652117                            | 0.041149817                                  | 0.993005836                    | 45.25462792                            |
| 0.34422567                             | -134.6756591                           | 0.017268951                                  | 0.990061961                    | 78.67987761                            |
| 0.410487331                            | -636.6424974                           | 0.031073726                                  | 0.992900148                    | 72.17347215                            |
| 0.460343545                            | 19.36026962                            | 0.044866391                                  | 0.989549575                    | 27.46459742                            |
| 0.417005819                            | 96.35047653                            | 0.033736989                                  | 0.992905535                    | 67.95640483                            |
| 0.448282612                            | 364.276105                             | 0.049846486                                  | 0.991471192                    | 55.72074498                            |
| 0.387342379                            | -49.86920887                           | 0.024959675                                  | 0.990118016                    | 73.80587573                            |
| 0.35685678                             | -245.9252422                           | 0.019115685                                  | 0.994143568                    | 77.58587189                            |
| 0.410225809                            | 381.6130136                            | 0.028919199                                  | 0.993496617                    | 75.19879066                            |
| 0.396427208                            | 57.36464899                            | 0.035278779                                  | 0.987944687                    | 32.9747231                             |
| 0.442112957                            | 78.18879092                            | 0.045723064                                  | 0.994833397                    | 68.63498951                            |
| 0.550419249                            | 30.91890871                            | 0.019558419                                  | 0.992581472                    | 22.69069214                            |
| 0.374774701                            | -59.85655775                           | 0.027156422                                  | 0.993723806                    | 79.86318613                            |
| 0.390686313                            | -228.3132093                           | 0.025759663                                  | 0.991989775                    | 57.40383094                            |
| 0.462500697                            | 35.06902494                            | 0.037416727                                  | 0.989920097                    | 60.63099453                            |
| 0.403728645                            | -332.1863576                           | 0.043341024                                  | 0.991167527                    | 59.57340132                            |
| 0.400687339                            | 126.0532476                            | 0.025917986                                  | 0.993258567                    | 77.00602403                            |
| 0.395627753                            | -341.0279108                           | 0.030398527                                  | 0.991914294                    | 59.40737232                            |
| 0.363166384                            | -161.6807103                           | 0.023457383                                  | 0.987249308                    | 62.31359205                            |
| 0.369173143                            | 268.3555689                            | 0.031999268                                  | 0.990237525                    | 100.4649454                            |
| 0.418110627                            | -213.6768818                           | 0.034783856                                  | 0.988581774                    | 43.81660098                            |
| 0.457961489                            | -47.58383938                           | 0.037046287                                  | 0.990293649                    | 33.52908                               |
| 0.470273843                            | 410.9710048                            | 0.068600184                                  | 0.990773218                    | 62.06460646                            |
| 0.42920979                             | 36.89821505                            | 0.035669122                                  | 0.989462671                    | 48.14880379                            |
| 0.323684874                            | -1676.82959                            | 0.019269021                                  | 0.991529911                    | 133.8966532                            |
| 0.323982573                            | -753.4938059                           | 0.027174511                                  | 0.98972116                     | 120.0454021                            |
| 0.458973114                            | -219.6832521                           | 0.051801895                                  | 0.994842818                    | 40.93204453                            |
| 0.395856209                            | -138.2805132                           | 0.0281895                                    | 0.991945898                    | 71.14899409                            |
| 0.416181186                            | -417.0613876                           | 0.027206462                                  | 0.993507834                    | 59.43158831                            |
| 0.358359597                            | -346.2438324                           | 0.020949319                                  | 0.992334279                    | 103.4050017                            |
| 0.492551156                            | 169.944016                             | 0.059835192                                  | 0.990891336                    | 49.77711696                            |
| 0.367659416                            | -490.1274665                           | 0.027118524                                  | 0.989195018                    | 84.28934183                            |
| 0.389125849                            | 38.15211564                            | 0.027803474                                  | 0.991652273                    | 57.07826838                            |
| 0.418739756                            | 76.48016913                            | 0.039651542                                  | 0.988015427                    | 50.03813917                            |
| 0.42203541                             | -77.7805593                            | 0.035618585                                  | 0.989900126                    | 59.14042558                            |
| 0.495692454                            | 189.8831292                            | 0.090846772                                  | 0.985103712                    | 60.53318145                            |
| 0.345473592                            | 82.01394406                            | 0.019726191                                  | 0.988537184                    | 90.8531253                             |
| 0.403350926                            | -266.4335661                           | 0.035964105                                  | 0.993133172                    | 55.84818679                            |
| 0.388330145                            | 28.39331616                            | 0.028354296                                  | 0.989644836                    | 51.07528297                            |
| 0.410085089                            | -44.88973856                           | 0.02339911                                   | 0.991926969                    | 50.57345028                            |
| 0.402645941                            | -130.6335091                           | 0.041895369                                  | 0.993880709                    | 98.43837985                            |
| 0.400624766                            | -156.6128292                           | 0.025988505                                  | 0.992658324                    | 96.30506749                            |
| 0.462134177                            | -1168.033101                           | 0.077780982                                  | 0.990450602                    | 72.91358826                            |
| 0.498010069                            | 0.363916434                            | 0.040841808                                  | 0.989374521                    | 27.20543107                            |
| 0.385733643                            | 108.3021818                            | 0.02267782                                   | 0.988385256                    | 54.88608958                            |

| log.sigma.5.0.mm.3D_glc_m_Contrast | log.sigma.5.0.mm.3D_glc_m_DifferenceEntropy | log.sigma.5.0.mm.3D_glc_m_InverseVariance | log.sigma.5.0.mm.3D_glc_m_Entropy | log.sigma.5.0.mm.3D_glc_m_Dissimilarity |
|------------------------------------|---------------------------------------------|-------------------------------------------|-----------------------------------|-----------------------------------------|
| 14.40094593                        | 3.020707228                                 | 0.311568334                               | 7.991313973                       | 2.82200412                              |
| 5.485336479                        | 2.339466423                                 | 0.4272412                                 | 6.299473649                       | 1.688148807                             |
| 7.754546609                        | 2.594911938                                 | 0.391128009                               | 7.337843549                       | 2.043981077                             |
| 10.37423125                        | 2.796685231                                 | 0.349914555                               | 7.533782218                       | 2.375274351                             |
| 6.392312738                        | 2.480699434                                 | 0.403354791                               | 6.952658744                       | 1.819605827                             |
| 8.406559136                        | 2.607551048                                 | 0.362761882                               | 6.730258249                       | 2.062289543                             |
| 8.758138331                        | 2.695867801                                 | 0.3671851                                 | 7.553626637                       | 2.202477392                             |
| 7.804640318                        | 2.616527539                                 | 0.39428458                                | 7.326348319                       | 1.988629886                             |
| 9.388240832                        | 2.715644782                                 | 0.369618849                               | 7.578572833                       | 2.210816477                             |
| 9.564769225                        | 2.730650051                                 | 0.346370876                               | 7.226381693                       | 2.336012343                             |
| 5.878134247                        | 2.419239647                                 | 0.404518692                               | 6.854750846                       | 1.80230698                              |
| 7.025035442                        | 2.579972263                                 | 0.385143265                               | 7.306875538                       | 1.972018131                             |
| 6.20691251                         | 2.426635169                                 | 0.413911345                               | 6.76434907                        | 1.703763371                             |
| 8.628472055                        | 2.691091439                                 | 0.377659615                               | 7.247750789                       | 2.122429334                             |
| 8.981189243                        | 2.721480779                                 | 0.36010061                                | 7.357467513                       | 2.242234544                             |
| 9.856806996                        | 2.718617031                                 | 0.337744208                               | 7.616806028                       | 2.409678753                             |
| 7.509468444                        | 2.583394073                                 | 0.383955857                               | 6.863070886                       | 2.036278387                             |
| 6.455819978                        | 2.45336027                                  | 0.402070076                               | 6.562728289                       | 1.754429502                             |
| 4.436829611                        | 2.24028856                                  | 0.43171031                                | 6.324040535                       | 1.536714103                             |
| 9.210493655                        | 2.734094425                                 | 0.356768474                               | 7.714568716                       | 2.276815833                             |
| 4.826485801                        | 2.313605877                                 | 0.428497616                               | 6.58803306                        | 1.573665868                             |
| 5.972362565                        | 2.430983707                                 | 0.399394092                               | 6.833695674                       | 1.833613384                             |
| 5.311959485                        | 2.362037515                                 | 0.422940035                               | 6.829959054                       | 1.703223534                             |
| 6.896752051                        | 2.539806227                                 | 0.396812254                               | 6.987088493                       | 1.885578764                             |
| 10.78995711                        | 2.799864008                                 | 0.338061879                               | 7.223798988                       | 2.472690659                             |
| 10.22585769                        | 2.800556307                                 | 0.346706998                               | 7.476771004                       | 2.368035244                             |
| 11.2328396                         | 2.836673772                                 | 0.359525596                               | 7.699619576                       | 2.408011658                             |
| 5.976386576                        | 2.476192885                                 | 0.399605815                               | 6.938050294                       | 1.804761168                             |
| 5.204071062                        | 2.334897048                                 | 0.408580091                               | 6.290528042                       | 1.695289989                             |
| 4.342855394                        | 2.258643904                                 | 0.436139824                               | 6.560854224                       | 1.517115511                             |
| 8.224025722                        | 2.64378943                                  | 0.386002613                               | 7.349869747                       | 2.061135428                             |
| 5.549771481                        | 2.351925294                                 | 0.431832162                               | 6.154663421                       | 1.588609981                             |
| 10.25321223                        | 2.786096193                                 | 0.355501425                               | 7.785054449                       | 2.372699262                             |
| 10.44077381                        | 2.804131608                                 | 0.341064327                               | 7.597762649                       | 2.441361597                             |
| 8.02115324                         | 2.644520666                                 | 0.37367055                                | 7.365276811                       | 2.132934142                             |
| 6.595560565                        | 2.503658498                                 | 0.402621662                               | 6.998764837                       | 1.868809136                             |
| 8.524591161                        | 2.564699826                                 | 0.409621108                               | 6.879291521                       | 1.919088721                             |
| 10.94720836                        | 2.815551598                                 | 0.340200831                               | 7.910092939                       | 2.332046327                             |
| 2.744676947                        | 1.975534297                                 | 0.470862198                               | 5.662212051                       | 1.267804709                             |
| 10.70909476                        | 2.839823883                                 | 0.343076288                               | 8.040333305                       | 2.454958492                             |
| 8.268418052                        | 2.632775912                                 | 0.397472059                               | 6.966668762                       | 2.015734457                             |
| 11.14239537                        | 2.853266716                                 | 0.329104472                               | 7.877291689                       | 2.533056771                             |
| 11.81941889                        | 2.877728226                                 | 0.336050192                               | 7.696003173                       | 2.572893666                             |
| 7.767250593                        | 2.631251986                                 | 0.378730881                               | 7.16358285                        | 2.064489353                             |
| 6.38068607                         | 2.48400631                                  | 0.408852115                               | 6.825934893                       | 1.844885528                             |
| 10.4609721                         | 2.784991815                                 | 0.362446209                               | 7.564962703                       | 2.350317501                             |
| 6.877242577                        | 2.538667275                                 | 0.394440052                               | 7.131068183                       | 1.921836289                             |
| 4.408414023                        | 2.229525243                                 | 0.440064081                               | 6.170714837                       | 1.555485836                             |
| 6.236170364                        | 2.468220557                                 | 0.40441275                                | 6.916633708                       | 1.828076033                             |
| 5.500748576                        | 2.36664367                                  | 0.402433808                               | 6.489234561                       | 1.704131197                             |
| 9.124353795                        | 2.726227485                                 | 0.353299528                               | 7.600731098                       | 2.281837507                             |
| 11.53071269                        | 2.886715124                                 | 0.328792614                               | 7.81694245                        | 2.576559162                             |
| 5.98953537                         | 2.462588182                                 | 0.407558614                               | 7.135096951                       | 1.7966018                               |
| 10.50550332                        | 2.779573813                                 | 0.353454106                               | 7.170123628                       | 2.390702205                             |
| 9.235507465                        | 2.699054164                                 | 0.368967664                               | 7.265522409                       | 2.200133316                             |
| 5.643138374                        | 2.421050665                                 | 0.407625163                               | 6.826361717                       | 1.773772594                             |
| 9.887712485                        | 2.789726533                                 | 0.335011982                               | 7.719870129                       | 2.400365913                             |
| 7.569018026                        | 2.564132537                                 | 0.396198422                               | 7.163057803                       | 1.962496018                             |
| 5.88036411                         | 2.415160395                                 | 0.430041793                               | 6.450858825                       | 1.687065821                             |
| 7.498277348                        | 2.618741789                                 | 0.376075561                               | 7.387233041                       | 1.977434459                             |
| 6.528388008                        | 2.480603729                                 | 0.413621206                               | 6.810934009                       | 1.782706614                             |
| 8.078090595                        | 2.652526502                                 | 0.379879573                               | 7.398191145                       | 2.09954874                              |
| 10.61193019                        | 2.819914307                                 | 0.352647774                               | 7.702539158                       | 2.387176802                             |
| 7.756169875                        | 2.61250331                                  | 0.387438537                               | 7.353749817                       | 2.004236982                             |
| 6.721491469                        | 2.450553819                                 | 0.374548761                               | 6.50703272                        | 1.940384455                             |
| 6.503361842                        | 2.506289585                                 | 0.401282837                               | 7.089305853                       | 1.805208397                             |
| 3.079701116                        | 2.060792271                                 | 0.448491444                               | 5.815279955                       | 1.217807756                             |
| 9.32253982                         | 2.739917153                                 | 0.367707987                               | 7.608681887                       | 2.233489996                             |
| 7.966514806                        | 2.648910324                                 | 0.378364797                               | 7.302606264                       | 2.079599716                             |
| 5.147293096                        | 2.338634107                                 | 0.429068977                               | 6.643995545                       | 1.620471493                             |
| 8.328864768                        | 2.605701293                                 | 0.396002922                               | 6.965719883                       | 2.053704187                             |
| 8.568320887                        | 2.652617996                                 | 0.388111089                               | 7.464683759                       | 2.077782076                             |
| 7.542926094                        | 2.604688879                                 | 0.381704348                               | 7.137677776                       | 2.025013057                             |
| 9.817764888                        | 2.766341063                                 | 0.358951031                               | 7.442668022                       | 2.313478416                             |
| 9.777816584                        | 2.769513489                                 | 0.351428655                               | 7.741970467                       | 2.303919757                             |
| 6.913562344                        | 2.527233393                                 | 0.402336482                               | 6.822834718                       | 1.910798349                             |
| 5.924032093                        | 2.41519146                                  | 0.419966303                               | 6.604730203                       | 1.700416447                             |
| 5.079809408                        | 2.355488672                                 | 0.408267022                               | 6.52955627                        | 1.619193082                             |
| 5.338644748                        | 2.386640674                                 | 0.413790181                               | 6.838217432                       | 1.72503575                              |
| 13.37002565                        | 2.945566883                                 | 0.323438544                               | 7.898917546                       | 2.70134117                              |
| 14.68131299                        | 3.028208698                                 | 0.313705088                               | 8.014018637                       | 2.820620068                             |
| 5.783733203                        | 2.412954672                                 | 0.424749306                               | 6.567465195                       | 1.688243846                             |
| 8.0624062                          | 2.607695968                                 | 0.386540533                               | 7.348673814                       | 2.052421588                             |
| 6.006910612                        | 2.443539364                                 | 0.409062647                               | 7.046186399                       | 1.825444876                             |
| 10.24756625                        | 2.800727367                                 | 0.345717193                               | 7.816956145                       | 2.37467088                              |
| 4.230647388                        | 2.231754565                                 | 0.438987952                               | 6.433334145                       | 1.458016538                             |
| 10.17712704                        | 2.789520819                                 | 0.363723978                               | 7.584804095                       | 2.335169555                             |
| 8.908348906                        | 2.698014104                                 | 0.376334119                               | 7.27999834                        | 2.15313935                              |
| 6.10327753                         | 2.46684562                                  | 0.397132462                               | 6.876592098                       | 1.834185061                             |
| 6.622897269                        | 2.509787022                                 | 0.401522314                               | 7.060885702                       | 1.86813019                              |
| 5.843927609                        | 2.335965067                                 | 0.413004009                               | 6.105247759                       | 1.627191859                             |
| 10.7976726                         | 2.843712044                                 | 0.339011252                               | 7.768161626                       | 2.459284469                             |
| 7.256731486                        | 2.578570982                                 | 0.390850546                               | 7.149261648                       | 1.97601974                              |
| 7.909774728                        | 2.618732711                                 | 0.378510377                               | 7.180893639                       | 2.073691001                             |
| 6.078292743                        | 2.472318485                                 | 0.398255829                               | 7.083979985                       | 1.851825813                             |
| 10.1391076                         | 2.758572941                                 | 0.374962863                               | 7.521249995                       | 2.206075481                             |
| 6.341925539                        | 2.503656284                                 | 0.387541177                               | 7.499507518                       | 1.909815291                             |
| 9.155380571                        | 2.593635267                                 | 0.400408518                               | 6.561104123                       | 1.962677715                             |
| 3.195785985                        | 2.045345052                                 | 0.468959352                               | 6.094208486                       | 1.337974122                             |
| 8.97821159                         | 2.690938687                                 | 0.375121843                               | 7.328747793                       | 2.161589765                             |



| log.sigma.5.0.mm.3D_glcm_DifferenceVariance | log.sigma.5.0.mm.3D_glcm_Idn | log.sigma.5.0.mm.3D_glcm_Idm | log.sigma.5.0.mm.3D_glcm_Correlation | log.sigma.5.0.mm.3D_glcm_Autocorrelation |
|---------------------------------------------|------------------------------|------------------------------|--------------------------------------|------------------------------------------|
| 6.126568784                                 | 0.9292562                    | 0.319902835                  | 0.761569753                          | 463.580602                               |
| 2.421140774                                 | 0.915775199                  | 0.448025632                  | 0.754236663                          | 88.93366503                              |
| 3.385343469                                 | 0.928568121                  | 0.395190902                  | 0.81687084                           | 210.7121089                              |
| 4.498682885                                 | 0.921257196                  | 0.364920477                  | 0.814228238                          | 250.7009812                              |
| 2.971478544                                 | 0.930864413                  | 0.428142137                  | 0.766569739                          | 158.2469059                              |
| 3.693126313                                 | 0.916956291                  | 0.414184587                  | 0.746176005                          | 92.02826964                              |
| 3.72991599                                  | 0.941774518                  | 0.369579128                  | 0.785179291                          | 239.1571115                              |
| 3.760712193                                 | 0.949985384                  | 0.413160399                  | 0.806698701                          | 529.8473722                              |
| 4.218910517                                 | 0.936926768                  | 0.384510901                  | 0.778692959                          | 309.8535493                              |
| 3.811502328                                 | 0.931156828                  | 0.350870554                  | 0.737696746                          | 439.07867                                |
| 2.415323279                                 | 0.928252056                  | 0.422207395                  | 0.774899632                          | 145.6475936                              |
| 3.056469989                                 | 0.935175587                  | 0.399679261                  | 0.816853388                          | 247.8591645                              |
| 3.169070005                                 | 0.944032638                  | 0.467746762                  | 0.826492355                          | 239.9893737                              |
| 3.973405084                                 | 0.940877692                  | 0.398107371                  | 0.780293911                          | 362.1554317                              |
| 3.789454784                                 | 0.933753601                  | 0.366013224                  | 0.768958278                          | 224.5312151                              |
| 3.594552916                                 | 0.92899962                   | 0.336068555                  | 0.786461921                          | 342.3201113                              |
| 3.195057895                                 | 0.920200454                  | 0.391179454                  | 0.73945377                           | 232.2965731                              |
| 3.133025237                                 | 0.92178142                   | 0.460741991                  | 0.775973378                          | 97.53385548                              |
| 1.878463764                                 | 0.913344668                  | 0.473017654                  | 0.788522823                          | 61.06472737                              |
| 3.861444696                                 | 0.938283054                  | 0.358405663                  | 0.803222114                          | 296.2884195                              |
| 2.251884848                                 | 0.939307123                  | 0.471319116                  | 0.786372681                          | 180.0895565                              |
| 2.446354139                                 | 0.91700007                   | 0.410493108                  | 0.775093671                          | 106.3186013                              |
| 2.271987891                                 | 0.925849075                  | 0.437109747                  | 0.839163964                          | 122.3089138                              |
| 3.212594399                                 | 0.938153956                  | 0.425415888                  | 0.751283709                          | 207.3417428                              |
| 4.314464612                                 | 0.927656291                  | 0.340168598                  | 0.628582764                          | 333.58051                                |
| 4.411904647                                 | 0.937927201                  | 0.358301584                  | 0.75644428                           | 420.555623                               |
| 5.247852251                                 | 0.948186156                  | 0.363597357                  | 0.802945155                          | 604.6405031                              |
| 2.627111698                                 | 0.938164304                  | 0.427412122                  | 0.791033809                          | 249.3229141                              |
| 2.114337036                                 | 0.910409791                  | 0.443369391                  | 0.790461975                          | 73.25990831                              |
| 1.967845258                                 | 0.94327711                   | 0.472937658                  | 0.803128058                          | 185.7922577                              |
| 3.796972149                                 | 0.942457294                  | 0.403273277                  | 0.772764803                          | 337.5234755                              |
| 2.92983513                                  | 0.939542103                  | 0.48872118                   | 0.709152444                          | 267.4922834                              |
| 4.396556358                                 | 0.93612346                   | 0.354782589                  | 0.821377064                          | 339.1861338                              |
| 4.209466918                                 | 0.937609215                  | 0.343351384                  | 0.772443895                          | 413.8607765                              |
| 3.308944536                                 | 0.938394399                  | 0.373079224                  | 0.766969879                          | 393.0415763                              |
| 2.959593839                                 | 0.936361338                  | 0.419353841                  | 0.766371064                          | 300.639698                               |
| 4.63088235                                  | 0.95555898                   | 0.446331295                  | 0.763589548                          | 646.6720296                              |
| 5.161033767                                 | 0.946381919                  | 0.388131797                  | 0.84347756                           | 509.9427392                              |
| 1.078925026                                 | 0.915993402                  | 0.505796328                  | 0.695828001                          | 48.8310975                               |
| 4.503944142                                 | 0.933987932                  | 0.342073251                  | 0.819699562                          | 282.3944375                              |
| 4.074079557                                 | 0.940530818                  | 0.41869788                   | 0.738251864                          | 403.2989874                              |
| 4.469688112                                 | 0.941426355                  | 0.327189961                  | 0.79066889                           | 329.6217433                              |
| 4.851510139                                 | 0.927314589                  | 0.333288459                  | 0.719586758                          | 352.9523418                              |
| 3.379877636                                 | 0.940365438                  | 0.38961924                   | 0.734696303                          | 206.8590351                              |
| 2.881937079                                 | 0.927010647                  | 0.419818709                  | 0.795445844                          | 126.3849891                              |
| 4.632479772                                 | 0.936921114                  | 0.368648441                  | 0.756767305                          | 370.2792941                              |
| 3.054093757                                 | 0.938835147                  | 0.410560933                  | 0.768920849                          | 257.4417638                              |
| 1.84952388                                  | 0.900746552                  | 0.462067468                  | 0.771807676                          | 49.2767592                               |
| 2.763271908                                 | 0.935346014                  | 0.428023921                  | 0.829626664                          | 165.1099414                              |
| 2.352135834                                 | 0.929227679                  | 0.449160871                  | 0.751710185                          | 97.41448392                              |
| 3.740863027                                 | 0.925980507                  | 0.355199493                  | 0.788271371                          | 269.5331453                              |
| 4.688055626                                 | 0.922586042                  | 0.325955516                  | 0.748003435                          | 249.3823641                              |
| 2.660155155                                 | 0.938460613                  | 0.426745637                  | 0.815899281                          | 194.4864233                              |
| 4.509205816                                 | 0.911887849                  | 0.35264894                   | 0.623496141                          | 194.8958964                              |
| 4.126051409                                 | 0.918390229                  | 0.385833365                  | 0.766648831                          | 133.2555441                              |
| 2.380491324                                 | 0.942914911                  | 0.424463609                  | 0.777027933                          | 281.9595562                              |
| 3.91091174                                  | 0.931373899                  | 0.34422567                   | 0.776872315                          | 296.6490886                              |
| 3.530764193                                 | 0.944982058                  | 0.410487331                  | 0.810417436                          | 476.0048483                              |
| 2.970454313                                 | 0.935799956                  | 0.460343545                  | 0.647101274                          | 227.7897497                              |
| 3.456614347                                 | 0.944530604                  | 0.417005819                  | 0.801440689                          | 302.8147281                              |
| 3.243169609                                 | 0.94149279                   | 0.448282612                  | 0.787863321                          | 172.8376787                              |
| 3.545154375                                 | 0.933736415                  | 0.387342379                  | 0.802895954                          | 274.3245219                              |
| 4.72884923                                  | 0.948421048                  | 0.35685678                   | 0.760439889                          | 671.4366649                              |
| 3.579991021                                 | 0.946861454                  | 0.410225809                  | 0.812412009                          | 324.1244725                              |
| 2.746633695                                 | 0.926223955                  | 0.396427208                  | 0.659269336                          | 174.6322356                              |
| 3.147742199                                 | 0.953067618                  | 0.442112957                  | 0.827039235                          | 395.3916567                              |
| 1.549724858                                 | 0.945695053                  | 0.550419249                  | 0.760565718                          | 136.506553                               |
| 4.182486304                                 | 0.946845645                  | 0.374774701                  | 0.790491731                          | 435.7750721                              |
| 3.514211523                                 | 0.940037281                  | 0.390686313                  | 0.754657695                          | 359.9089731                              |
| 2.388470467                                 | 0.935210985                  | 0.462500697                  | 0.774344542                          | 182.8495431                              |
| 3.873911216                                 | 0.939330834                  | 0.403728645                  | 0.756006858                          | 319.1053026                              |
| 4.120756122                                 | 0.946631951                  | 0.400687339                  | 0.799685165                          | 444.7071951                              |
| 3.301041805                                 | 0.93968692                   | 0.395627753                  | 0.773507753                          | 390.6329219                              |
| 4.273016068                                 | 0.925463614                  | 0.363166384                  | 0.728357989                          | 248.4546344                              |
| 4.228407176                                 | 0.934298316                  | 0.369173143                  | 0.823430935                          | 241.3042514                              |
| 3.097778552                                 | 0.930387077                  | 0.418110627                  | 0.727590508                          | 262.1632976                              |
| 2.890712319                                 | 0.937679209                  | 0.457961489                  | 0.694259823                          | 212.8751028                              |
| 2.371575742                                 | 0.937752218                  | 0.470273843                  | 0.847591089                          | 109.8197049                              |
| 2.276751274                                 | 0.930890145                  | 0.42920979                   | 0.800137583                          | 163.3686198                              |
| 5.718769545                                 | 0.938243394                  | 0.323684874                  | 0.819012551                          | 563.7816478                              |
| 6.399158702                                 | 0.932816914                  | 0.323982573                  | 0.782851383                          | 551.1156226                              |
| 2.847373423                                 | 0.953470726                  | 0.458973114                  | 0.749847081                          | 350.5905559                              |
| 3.658897789                                 | 0.940929474                  | 0.395856209                  | 0.796589064                          | 328.5359524                              |
| 2.508199379                                 | 0.944976576                  | 0.416181186                  | 0.817818386                          | 344.6242264                              |
| 4.389411208                                 | 0.94086846                   | 0.35835597                   | 0.818777244                          | 381.5760182                              |
| 2.042990927                                 | 0.938617277                  | 0.492551156                  | 0.84082832                           | 136.8939192                              |
| 4.538709229                                 | 0.931650261                  | 0.367659416                  | 0.784374586                          | 313.714931                               |
| 4.109229892                                 | 0.94010399                   | 0.389125849                  | 0.731115262                          | 355.2819368                              |
| 2.617248966                                 | 0.927150042                  | 0.418797956                  | 0.782547883                          | 135.6245544                              |
| 3.012636099                                 | 0.934168173                  | 0.42203541                   | 0.797798628                          | 209.5855066                              |
| 2.817012163                                 | 0.927238492                  | 0.495692454                  | 0.823020731                          | 118.7756455                              |
| 4.544841948                                 | 0.92809989                   | 0.345473592                  | 0.787719734                          | 248.2973084                              |
| 3.21545423                                  | 0.944385022                  | 0.403350926                  | 0.76906023                           | 426.0370896                              |
| 3.399364572                                 | 0.932319097                  | 0.388330145                  | 0.732058584                          | 225.4985726                              |
| 2.53549465                                  | 0.938608772                  | 0.410085089                  | 0.784930119                          | 209.4011001                              |
| 5.100290698                                 | 0.950298658                  | 0.402645941                  | 0.813235731                          | 646.9589621                              |
| 2.571562431                                 | 0.940720579                  | 0.400624766                  | 0.876088669                          | 254.8956882                              |
| 5.020540121                                 | 0.942899815                  | 0.462134177                  | 0.779925287                          | 416.1606028                              |
| 1.31110259                                  | 0.930679803                  | 0.498010069                  | 0.788377415                          | 100.3330938                              |
| 4.108220105                                 | 0.930107619                  | 0.385733643                  | 0.718185805                          | 239.9765543                              |

| log.sigma.5.0.mm.3D_glcm_SumEntropy | log.sigma.5.0.mm.3D_glcm_AverageIntensity | log.sigma.5.0.mm.3D_glcm_Energy | log.sigma.5.0.mm.3D_glcm_SumSquares | log.sigma.5.0.mm.3D_glcm_ClusterProminence |
|-------------------------------------|-------------------------------------------|---------------------------------|-------------------------------------|--------------------------------------------|
| 5.334680264                         | 21.08567125                               | 0.006254624                     | 29.59790407                         | 38137.29983                                |
| 4.439880363                         | 8.975283194                               | 0.019927037                     | 11.11589762                         | 3292.431077                                |
| 5.084027905                         | 13.89968745                               | 0.008541171                     | 21.30980026                         | 14130.74822                                |
| 5.219873179                         | 15.11013011                               | 0.00863518                      | 27.957586                           | 29203.17214                                |
| 4.793275626                         | 12.1541244                                | 0.012233218                     | 13.7112401                          | 6452.514603                                |
| 4.728130726                         | 8.929977898                               | 0.015662255                     | 16.47130481                         | 7054.991614                                |
| 5.103592474                         | 14.98726162                               | 0.007553229                     | 20.63996785                         | 16369.33571                                |
| 5.039063086                         | 22.69196202                               | 0.011207636                     | 20.01600502                         | 19551.53071                                |
| 5.136403608                         | 17.19900979                               | 0.007807133                     | 21.48690257                         | 15829.53506                                |
| 4.917361971                         | 20.71593934                               | 0.008649631                     | 18.30949271                         | 14818.61249                                |
| 4.753667389                         | 11.64076811                               | 0.011656048                     | 13.05563575                         | 5614.551329                                |
| 5.042622305                         | 15.25207857                               | 0.009184008                     | 19.41089986                         | 12699.57362                                |
| 4.843785466                         | 15.02992888                               | 0.018164587                     | 18.3525084                          | 15915.64854                                |
| 4.97624819                          | 18.66494673                               | 0.011484718                     | 19.80710998                         | 17416.09257                                |
| 4.989985473                         | 14.50766827                               | 0.010212879                     | 19.72353059                         | 17991.80252                                |
| 5.154556675                         | 18.07243381                               | 0.007402899                     | 23.3144158                          | 23256.48705                                |
| 4.664484128                         | 14.88157647                               | 0.01287065                      | 14.59152981                         | 10533.97871                                |
| 4.607111319                         | 9.283321591                               | 0.01860558                      | 14.57349083                         | 6445.746316                                |
| 4.491226742                         | 7.269958683                               | 0.017855961                     | 10.41159073                         | 2991.953439                                |
| 5.222232885                         | 16.72413863                               | 0.007016624                     | 23.70118896                         | 20134.06508                                |
| 4.637785475                         | 13.08037491                               | 0.016376428                     | 11.40352164                         | 4564.145058                                |
| 4.754664075                         | 9.798480517                               | 0.011431767                     | 13.27401087                         | 5399.05907                                 |
| 4.899532604                         | 10.39865486                               | 0.012802816                     | 16.79190033                         | 9094.899513                                |
| 4.774927495                         | 14.0387647                                | 0.012619594                     | 13.99594546                         | 7929.150036                                |
| 4.777430284                         | 18.07156366                               | 0.009672402                     | 14.82656036                         | 7407.994515                                |
| 5.025495933                         | 20.17455903                               | 0.009541115                     | 21.05481456                         | 25121.90194                                |
| 5.24412199                          | 24.1971051                                | 0.008204714                     | 28.40172282                         | 54717.0786                                 |
| 4.796381056                         | 15.43288359                               | 0.01359477                      | 14.39208192                         | 8680.250538                                |
| 4.547415915                         | 7.974697414                               | 0.017907945                     | 12.24798273                         | 4418.450604                                |
| 4.648668943                         | 13.30180685                               | 0.016125534                     | 11.02002614                         | 4625.398142                                |
| 4.998629921                         | 18.05307668                               | 0.009509274                     | 18.30668648                         | 12425.02444                                |
| 4.285037726                         | 16.1479263                                | 0.025530754                     | 9.50760235                          | 7377.479455                                |
| 5.304636921                         | 17.83727624                               | 0.007129486                     | 28.89312801                         | 33735.34072                                |
| 5.114669887                         | 19.97802769                               | 0.00816025                      | 22.70973712                         | 26047.84473                                |
| 4.968265456                         | 19.56200421                               | 0.008538104                     | 17.30363408                         | 12914.02176                                |
| 4.807192681                         | 17.02738963                               | 0.011079309                     | 14.22651855                         | 8013.482128                                |
| 4.769776186                         | 25.20175328                               | 0.017755612                     | 18.00196065                         | 33267.35966                                |
| 5.483098544                         | 21.99114943                               | 0.007504664                     | 34.54514184                         | 49119.55346                                |
| 3.988595278                         | 6.758736508                               | 0.025559117                     | 4.516078071                         | 661.5515944                                |
| 5.407577662                         | 16.12750696                               | 0.005502256                     | 30.15767984                         | 33241.55457                                |
| 4.704501596                         | 19.86914198                               | 0.015318082                     | 15.99909924                         | 18889.01135                                |
| 5.283926905                         | 17.664944                                 | 0.00627395                      | 26.6064177                          | 33179.99967                                |
| 5.077347846                         | 18.47411858                               | 0.007369047                     | 21.18914781                         | 15820.54607                                |
| 4.822338221                         | 14.02124905                               | 0.018090534                     | 14.87395356                         | 8531.913357                                |
| 4.747920236                         | 10.67334655                               | 0.013524913                     | 15.61742874                         | 8577.395348                                |
| 5.091747964                         | 18.90824154                               | 0.007851586                     | 21.50987071                         | 22310.339                                  |
| 4.867815318                         | 15.71011878                               | 0.010971522                     | 15.18080576                         | 8429.971098                                |
| 4.367562722                         | 6.46883223                                | 0.0191316                       | 9.614865991                         | 2364.91764                                 |
| 4.921409935                         | 12.24562981                               | 0.012787348                     | 18.24174804                         | 13880.44556                                |
| 4.563345442                         | 9.430421313                               | 0.016745532                     | 11.22726007                         | 4166.867144                                |
| 5.145331206                         | 15.91212673                               | 0.00707403                      | 22.05945867                         | 16257.43268                                |
| 5.171717432                         | 15.28340672                               | 0.006165857                     | 23.22809163                         | 17501.48833                                |
| 4.945563095                         | 13.45768955                               | 0.011130064                     | 16.41952935                         | 10386.83567                                |
| 4.73042934                          | 13.6463559                                | 0.009355829                     | 13.92104366                         | 5160.481156                                |
| 4.970386137                         | 10.87114468                               | 0.009176261                     | 19.65705504                         | 10567.12158                                |
| 4.737954616                         | 16.51443025                               | 0.01333418                      | 12.93077555                         | 6246.992642                                |
| 5.168970256                         | 16.77307413                               | 0.006637159                     | 22.51988427                         | 18607.06142                                |
| 4.958298612                         | 21.50263355                               | 0.011721541                     | 19.76021937                         | 29079.82563                                |
| 4.383853268                         | 14.91279095                               | 0.01982645                      | 8.336240382                         | 2637.777684                                |
| 5.049238479                         | 17.00203438                               | 0.009798568                     | 19.09985085                         | 16141.9065                                 |
| 4.733590812                         | 12.67669729                               | 0.015842822                     | 15.68284862                         | 10167.37189                                |
| 5.054598297                         | 16.09557623                               | 0.008659365                     | 20.87005074                         | 14574.27526                                |
| 5.137849036                         | 25.66346956                               | 0.007367352                     | 22.36735557                         | 25206.71382                                |
| 5.057964738                         | 17.57767731                               | 0.010340302                     | 20.9056857                          | 18630.39671                                |
| 4.45019974                          | 12.96246655                               | 0.015307313                     | 9.924053643                         | 3183.60441                                 |
| 4.967055986                         | 19.53375516                               | 0.013937405                     | 18.67178993                         | 18712.34945                                |
| 4.187420173                         | 11.47141129                               | 0.031440507                     | 6.442598314                         | 2109.761043                                |
| 5.136809109                         | 20.51195431                               | 0.008737459                     | 22.02499566                         | 26152.20342                                |
| 4.91502298                          | 18.72005329                               | 0.009766956                     | 16.57806722                         | 12970.61958                                |
| 4.629257433                         | 13.18973746                               | 0.014660896                     | 11.44457191                         | 4008.936614                                |
| 4.79787769                          | 17.55417291                               | 0.013724479                     | 17.3324009                          | 17266.37396                                |
| 5.117046787                         | 20.7277882                                | 0.009347339                     | 21.22207927                         | 18816.9048                                 |
| 4.890550959                         | 19.49223914                               | 0.011161255                     | 16.9598924                          | 15836.37142                                |
| 4.975468927                         | 15.35273987                               | 0.008778184                     | 18.20791838                         | 13018.36604                                |
| 5.30850484                          | 14.84237226                               | 0.007300036                     | 28.15544368                         | 26842.36165                                |
| 4.661707726                         | 15.90314762                               | 0.01330749                      | 12.68254083                         | 7213.12106                                 |
| 4.52802554                          | 14.35122203                               | 0.015119592                     | 9.863278023                         | 3757.494816                                |
| 4.732771334                         | 9.775165671                               | 0.02073745                      | 16.78610397                         | 12076.03781                                |
| 4.778417902                         | 12.35467129                               | 0.012424643                     | 13.37186213                         | 5915.155144                                |
| 5.363773631                         | 23.16186788                               | 0.006847927                     | 36.25375192                         | 77590.85192                                |
| 5.402357642                         | 22.99168179                               | 0.006287685                     | 32.99681098                         | 52478.53966                                |
| 4.569529827                         | 18.53699892                               | 0.018581891                     | 11.76196086                         | 10730.32421                                |
| 5.049475099                         | 17.74462181                               | 0.010499199                     | 20.12171351                         | 18569.05396                                |
| 4.879716784                         | 18.24685511                               | 0.011628084                     | 16.62566565                         | 17113.5659                                 |
| 5.331635701                         | 18.98833475                               | 0.006831504                     | 28.33051416                         | 36579.59808                                |
| 4.667399668                         | 11.20279364                               | 0.018750955                     | 13.50194109                         | 5875.817989                                |
| 5.136782493                         | 17.23564804                               | 0.008651217                     | 24.02628311                         | 24258.73318                                |
| 4.921929456                         | 18.60640667                               | 0.009699533                     | 16.69663736                         | 9767.994513                                |
| 4.782424877                         | 11.16297488                               | 0.012626384                     | 14.03535417                         | 6467.10192                                 |
| 4.906965801                         | 14.01498828                               | 0.012485005                     | 16.44083071                         | 11504.22721                                |
| 4.528516302                         | 10.25108396                               | 0.026680139                     | 16.59472727                         | 6286.940109                                |
| 5.2568714                           | 15.1583446                                | 0.006667049                     | 25.94528589                         | 23694.77965                                |
| 4.86503328                          | 20.40126225                               | 0.011732074                     | 15.73843781                         | 15069.98158                                |
| 4.845017085                         | 14.66528789                               | 0.010770144                     | 14.91820614                         | 8281.148287                                |
| 4.858954801                         | 14.08361386                               | 0.010546247                     | 14.20686265                         | 7582.295815                                |
| 5.189703089                         | 25.06573648                               | 0.010473985                     | 27.34581361                         | 40997.28319                                |
| 5.287532422                         | 15.26089525                               | 0.008229364                     | 25.87359602                         | 26337.3815                                 |
| 4.584566454                         | 20.08130681                               | 0.022374904                     | 20.6077851                          | 37859.70758                                |
| 4.382179197                         | 9.712314013                               | 0.020059771                     | 7.600304264                         | 2096.643206                                |
| 4.894124451                         | 15.12763795                               | 0.00886344                      | 16.11321677                         | 7881.198308                                |

| log.sigma.5.0.mm.3D_glmc_SumAverage | log.sigma.5.0.mm.3D_glmc_lmc2 | log.sigma.5.0.mm.3D_glmc_lmc1 | log.sigma.5.0.mm.3D_glmc_DifferenceAverage | log.sigma.5.0.mm.3D_glmc_Id |
|-------------------------------------|-------------------------------|-------------------------------|--------------------------------------------|-----------------------------|
| 41.98816602                         | 0.903981363                   | -0.200534958                  | 2.82200412                                 | 0.400693067                 |
| 17.95056639                         | 0.894465989                   | -0.238371234                  | 1.688148808                                | 0.506501443                 |
| 27.7993749                          | 0.924677702                   | -0.246290538                  | 2.043891077                                | 0.463408992                 |
| 30.20060836                         | 0.941522241                   | -0.259544378                  | 2.375274351                                | 0.438498484                 |
| 24.3082488                          | 0.892398585                   | -0.214885282                  | 1.819605827                                | 0.491544461                 |
| 17.8599558                          | 0.918251269                   | -0.257648165                  | 2.062289543                                | 0.480462954                 |
| 29.88027149                         | 0.889748847                   | -0.198369703                  | 2.202477392                                | 0.443516309                 |
| 45.31988345                         | 0.910416438                   | -0.222023845                  | 1.988629886                                | 0.477976168                 |
| 34.26008533                         | 0.893072148                   | -0.206770851                  | 2.210816477                                | 0.454699491                 |
| 41.2638462                          | 0.899191842                   | -0.213531889                  | 2.336012343                                | 0.428853712                 |
| 23.28153623                         | 0.893843691                   | -0.227568282                  | 1.802306698                                | 0.486967226                 |
| 30.47220137                         | 0.916790111                   | -0.22935304                   | 1.972018131                                | 0.468658237                 |
| 30.00740998                         | 0.936706894                   | -0.281145688                  | 1.703763371                                | 0.522673984                 |
| 37.24335227                         | 0.913396259                   | -0.228116221                  | 2.122429334                                | 0.465547286                 |
| 28.95817185                         | 0.896169456                   | -0.207319538                  | 2.242234544                                | 0.440658482                 |
| 36.01679612                         | 0.904745173                   | -0.210895503                  | 2.409678753                                | 0.416988546                 |
| 29.76315293                         | 0.866237818                   | -0.195964199                  | 2.036278387                                | 0.461210469                 |
| 18.56664318                         | 0.906802057                   | -0.246188083                  | 1.754429502                                | 0.517511868                 |
| 14.53991737                         | 0.891061241                   | -0.238652273                  | 1.536714103                                | 0.527697948                 |
| 33.31874128                         | 0.904244567                   | -0.207610634                  | 2.276815833                                | 0.434678228                 |
| 26.16074982                         | 0.897753612                   | -0.234460497                  | 1.573665868                                | 0.526135784                 |
| 19.59696103                         | 0.904820514                   | -0.232419296                  | 1.833613384                                | 0.478128572                 |
| 20.79730972                         | 0.940101167                   | -0.283444893                  | 1.703223534                                | 0.498313377                 |
| 28.06386908                         | 0.879448928                   | -0.203169149                  | 1.885578764                                | 0.488765334                 |
| 36.02513795                         | 0.839993947                   | -0.169404787                  | 2.472690659                                | 0.419112133                 |
| 40.22199254                         | 0.883394993                   | -0.194595428                  | 2.368035244                                | 0.434072605                 |
| 48.24264502                         | 0.918871088                   | -0.22339082                   | 2.408011658                                | 0.436557763                 |
| 30.85421286                         | 0.892156328                   | -0.21386111                   | 1.804761168                                | 0.491303824                 |
| 15.94939483                         | 0.932650362                   | -0.286864354                  | 1.695289989                                | 0.50445016                  |
| 26.60361369                         | 0.908831825                   | -0.244244901                  | 1.517115511                                | 0.527705162                 |
| 35.97716138                         | 0.890051898                   | -0.205586175                  | 2.061135428                                | 0.469891306                 |
| 32.2958526                          | 0.842434048                   | -0.194425573                  | 1.588609881                                | 0.538899358                 |
| 35.53263161                         | 0.921243496                   | -0.227596334                  | 2.372699262                                | 0.430493784                 |
| 39.80716577                         | 0.897803557                   | -0.203438679                  | 2.441361597                                | 0.421695136                 |
| 38.9807714                          | 0.874701224                   | -0.189352175                  | 2.132934142                                | 0.446630465                 |
| 34.04461622                         | 0.88607386                    | -0.209970882                  | 1.868809136                                | 0.483893787                 |
| 50.31475869                         | 0.897980532                   | -0.227893028                  | 1.919088721                                | 0.503550708                 |
| 43.8449313                          | 0.949482494                   | -0.266269308                  | 2.332046327                                | 0.458519773                 |
| 13.51747302                         | 0.809461634                   | -0.184661915                  | 1.267804709                                | 0.553896989                 |
| 32.12386093                         | 0.908432526                   | -0.205596951                  | 2.454958492                                | 0.420466918                 |
| 39.57788124                         | 0.859264153                   | -0.184087787                  | 2.015734457                                | 0.481399632                 |
| 35.13754284                         | 0.898426449                   | -0.200154075                  | 2.533056771                                | 0.40913954                  |
| 36.76648041                         | 0.851399482                   | -0.167144966                  | 2.572893666                                | 0.412508242                 |
| 28.00470916                         | 0.865853935                   | -0.185480513                  | 2.064489353                                | 0.460008031                 |
| 21.34669311                         | 0.905088964                   | -0.230817495                  | 1.844885528                                | 0.484060923                 |
| 37.63503555                         | 0.889915217                   | -0.201351693                  | 2.350317501                                | 0.44083623                  |
| 31.36771413                         | 0.879871294                   | -0.200521158                  | 1.921836289                                | 0.476969958                 |
| 12.93766446                         | 0.882812097                   | -0.233919585                  | 1.555485836                                | 0.518220039                 |
| 24.49125963                         | 0.941928444                   | -0.28200312                   | 1.828076033                                | 0.490830602                 |
| 18.86084263                         | 0.892336177                   | -0.240435421                  | 1.704131197                                | 0.509441066                 |
| 31.76894551                         | 0.900416121                   | -0.207566054                  | 2.281837507                                | 0.432437934                 |
| 30.48705423                         | 0.86662452                    | -0.171839758                  | 2.576559162                                | 0.407404638                 |
| 26.91134171                         | 0.906870472                   | -0.226822036                  | 1.7966018                                  | 0.490282118                 |
| 27.2927118                          | 0.839418229                   | -0.165345201                  | 2.390702205                                | 0.428856072                 |
| 21.74228936                         | 0.90841678                    | -0.226208562                  | 2.200133316                                | 0.455840125                 |
| 32.98805011                         | 0.892750132                   | -0.220089429                  | 1.773772594                                | 0.488885849                 |
| 33.43243659                         | 0.883250145                   | -0.189317674                  | 2.400365913                                | 0.423545316                 |
| 42.88781217                         | 0.909000191                   | -0.230815337                  | 1.962496018                                | 0.4763785                   |
| 29.8255819                          | 0.835286025                   | -0.176587985                  | 1.687065821                                | 0.515720224                 |
| 33.92253721                         | 0.898422517                   | -0.211582388                  | 1.977434459                                | 0.482646682                 |
| 25.34040513                         | 0.906491473                   | -0.234213525                  | 1.782706614                                | 0.506449352                 |
| 32.11582173                         | 0.909779323                   | -0.21962867                   | 2.09954874                                 | 0.457614293                 |
| 51.1736486                          | 0.878644205                   | -0.183907539                  | 2.387176802                                | 0.432271633                 |
| 35.0574112                          | 0.904096746                   | -0.220603839                  | 2.004236982                                | 0.476004872                 |
| 25.9249331                          | 0.870092751                   | -0.213066449                  | 1.940384455                                | 0.468098963                 |
| 38.97924847                         | 0.926907611                   | -0.251578336                  | 1.805208397                                | 0.502496943                 |
| 22.94282257                         | 0.883064298                   | -0.240003997                  | 1.217807756                                | 0.590670829                 |
| 40.89588707                         | 0.893212771                   | -0.199738867                  | 2.233489996                                | 0.44699039                  |
| 37.28419741                         | 0.861818065                   | -0.180713376                  | 2.079599716                                | 0.460607491                 |
| 26.37947493                         | 0.885545046                   | -0.222073401                  | 1.620471493                                | 0.5185682                   |
| 34.99981072                         | 0.909246627                   | -0.234221144                  | 2.053704187                                | 0.469539133                 |
| 41.35588706                         | 0.913680508                   | -0.224057777                  | 2.077782076                                | 0.467702976                 |
| 38.86696101                         | 0.892810619                   | -0.211315204                  | 2.025013057                                | 0.465048613                 |
| 30.68026306                         | 0.867723428                   | -0.181722766                  | 2.313478416                                | 0.437524332                 |
| 29.57101445                         | 0.925206407                   | -0.23382592                   | 2.303919757                                | 0.442928668                 |
| 31.80629524                         | 0.871448959                   | -0.202888832                  | 1.910798349                                | 0.482085448                 |
| 28.70244407                         | 0.856660275                   | -0.19911904                   | 1.700416447                                | 0.514666774                 |
| 19.55031314                         | 0.942556401                   | -0.296179835                  | 1.619193082                                | 0.526328675                 |
| 24.70934258                         | 0.907144248                   | -0.23250535                   | 1.72503575                                 | 0.492870462                 |
| 46.19842092                         | 0.92405444                    | -0.22741687                   | 2.70134117                                 | 0.404710679                 |
| 45.81570814                         | 0.923031652                   | -0.221251068                  | 2.820620068                                | 0.403823567                 |
| 36.97566734                         | 0.884086652                   | -0.217784022                  | 1.688243846                                | 0.515119176                 |
| 35.36901706                         | 0.909347263                   | -0.225625348                  | 2.052421588                                | 0.464528878                 |
| 36.39984049                         | 0.901056035                   | -0.226286514                  | 1.825444876                                | 0.481531445                 |
| 37.85357732                         | 0.924833399                   | -0.231946371                  | 2.37467088                                 | 0.434018391                 |
| 22.40558728                         | 0.933166953                   | -0.283578763                  | 1.458016538                                | 0.543403772                 |
| 34.36119766                         | 0.90108982                    | -0.208285665                  | 2.335169555                                | 0.440081229                 |
| 37.05204043                         | 0.881286699                   | -0.195046994                  | 2.15313935                                 | 0.458532768                 |
| 22.32594976                         | 0.907296749                   | -0.232548834                  | 1.834185061                                | 0.484488391                 |
| 28.02997657                         | 0.912514821                   | -0.235978906                  | 1.86813019                                 | 0.486000419                 |
| 20.50216791                         | 0.940129233                   | -0.315322518                  | 1.627191859                                | 0.54502924                  |
| 30.21540641                         | 0.910742095                   | -0.211658031                  | 2.459284469                                | 0.42332538                  |
| 40.68841143                         | 0.87346325                    | -0.195924658                  | 1.97601974                                 | 0.470896929                 |
| 29.30475762                         | 0.860326509                   | -0.185478566                  | 2.073691001                                | 0.458985081                 |
| 28.16181576                         | 0.883747761                   | -0.205114944                  | 1.851825813                                | 0.477484549                 |
| 49.99419553                         | 0.928396364                   | -0.241832091                  | 2.206075481                                | 0.468378437                 |
| 30.48911227                         | 0.947494646                   | -0.27408922                   | 1.909815291                                | 0.470202121                 |
| 40.00960283                         | 0.918438806                   | -0.257447283                  | 1.962677715                                | 0.515499512                 |
| 19.42462803                         | 0.898482048                   | -0.255438943                  | 1.337974122                                | 0.546737602                 |
| 30.23185663                         | 0.848828683                   | -0.173278672                  | 2.161589765                                | 0.45602247                  |

| log.sigma.5.0.mm.3D_glcm_ClusterTendency | log.sigma.5.0.mm.3D_firstorder_InterquartileRange | log.sigma.5.0.mm.3D_firstorder_Skewness | log.sigma.5.0.mm.3D_firstorder_Uniformity |
|------------------------------------------|---------------------------------------------------|-----------------------------------------|-------------------------------------------|
| 105.6793106                              | 163.264656                                        | -0.493503673                            | 0.056881767                               |
| 38.97825399                              | 125.055994                                        | 0.495227102                             | 0.098442621                               |
| 77.48465443                              | 175.7539845                                       | 0.194286206                             | 0.060534023                               |
| 100.8516071                              | 159.2627674                                       | -0.394181737                            | 0.059370642                               |
| 48.45264768                              | 121.355021                                        | 0.270228252                             | 0.079170043                               |
| 57.47866011                              | 162.0061445                                       | 0.455273458                             | 0.079889807                               |
| 72.48315608                              | 153.4240494                                       | 0.320240393                             | 0.063423862                               |
| 73.2338411                               | 133.0410414                                       | 0.156915528                             | 0.071568452                               |
| 74.94402647                              | 154.5486975                                       | 0.087832579                             | 0.061904617                               |
| 63.0871604                               | 154.702301                                        | -0.466649218                            | 0.066988402                               |
| 46.34440876                              | 137.3734412                                       | 0.05943152                              | 0.076575681                               |
| 69.78443945                              | 154.9876328                                       | 0.025903015                             | 0.066975593                               |
| 65.6658902                               | 99.10978413                                       | 0.378450945                             | 0.089019703                               |
| 70.12114013                              | 132.5885124                                       | -0.069218592                            | 0.072867882                               |
| 68.45770525                              | 118.1708493                                       | 0.199336053                             | 0.073899665                               |
| 81.87606278                              | 159.4869595                                       | -0.361102713                            | 0.059629724                               |
| 50.81517238                              | 103.0876703                                       | -1.090671239                            | 0.089129343                               |
| 51.83814332                              | 128.9493294                                       | 0.68771079                              | 0.091217525                               |
| 37.20953331                              | 120.9110012                                       | 0.437077701                             | 0.094368247                               |
| 84.15201972                              | 163.3976707                                       | 0.074832107                             | 0.058465791                               |
| 40.78760076                              | 118.0827999                                       | 0.129359864                             | 0.087751909                               |
| 47.12368093                              | 133.7092285                                       | 0.137289064                             | 0.075976538                               |
| 61.8564183                               | 145.7075653                                       | 0.316569937                             | 0.072454453                               |
| 48.63588591                              | 116.1272717                                       | 0.389337298                             | 0.080689104                               |
| 47.15666087                              | 121.0741043                                       | -0.19816737                             | 0.074968729                               |
| 74.54672713                              | 125.7380028                                       | -0.644063966                            | 0.069461478                               |
| 102.3679178                              | 136.8054276                                       | -0.88299405                             | 0.064813459                               |
| 51.23723222                              | 112.3358612                                       | 0.149593293                             | 0.08371029                                |
| 43.78785984                              | 133.0784588                                       | 0.546039438                             | 0.087898943                               |
| 39.73724918                              | 104.3232117                                       | 0.217930572                             | 0.089007698                               |
| 63.92010619                              | 145.1519146                                       | 0.030910507                             | 0.068099019                               |
| 32.48063792                              | 71.38843346                                       | -1.635176302                            | 0.125010249                               |
| 104.3201083                              | 160.5144186                                       | -0.369440431                            | 0.055956294                               |
| 81.15171053                              | 141.4694967                                       | -0.521839716                            | 0.063487913                               |
| 60.6341017                               | 139.7220631                                       | -0.160190812                            | 0.068693022                               |
| 50.06836926                              | 134.3289261                                       | -0.304431033                            | 0.075403483                               |
| 63.60462669                              | 91.45059204                                       | -1.150150719                            | 0.094384227                               |
| 128.1959649                              | 206.0783358                                       | -0.228059736                            | 0.049846183                               |
| 15.31963534                              | 74.29942417                                       | 0.03766496                              | 0.129372728                               |
| 108.3288886                              | 180.88238                                         | 0.062328627                             | 0.051294669                               |
| 55.02475495                              | 100.9912119                                       | -1.275267835                            | 0.08960361                                |
| 94.91786247                              | 158.7224917                                       | 0.276528734                             | 0.058427121                               |
| 71.83666253                              | 148.1284943                                       | 0.216187439                             | 0.064019845                               |
| 50.93031545                              | 114.3015203                                       | -0.143641805                            | 0.078002063                               |
| 56.08902889                              | 140.4740028                                       | 0.670817435                             | 0.078686866                               |
| 75.13075373                              | 157.233017                                        | -0.352663581                            | 0.062361439                               |
| 52.66317666                              | 123.8756847                                       | 0.199099361                             | 0.076258115                               |
| 34.05104994                              | 124.747633                                        | 0.420424503                             | 0.095762027                               |
| 66.7308218                               | 140.7200346                                       | 0.479373482                             | 0.072481259                               |
| 39.40829172                              | 134.8326378                                       | 0.360564017                             | 0.087351415                               |
| 77.70622037                              | 166.0062485                                       | -0.083588283                            | 0.060192634                               |
| 79.5640573                               | 155.471591                                        | 0.161666229                             | 0.060185727                               |
| 59.5405545                               | 128.5270658                                       | 0.284210068                             | 0.073222449                               |
| 45.17867134                              | 140.538208                                        | -0.07066601                             | 0.07274765                                |
| 69.39271271                              | 176.3619366                                       | 0.266634405                             | 0.063947086                               |
| 45.25462792                              | 107.5157499                                       | -0.086546866                            | 0.084172518                               |
| 78.67987761                              | 163.2070694                                       | -0.146634148                            | 0.059256052                               |
| 72.17347215                              | 120.284523                                        | -1.065510062                            | 0.074213206                               |
| 27.46459742                              | 95.41027975                                       | -0.372324823                            | 0.099912221                               |
| 67.95640483                              | 142.9445686                                       | 0.225574021                             | 0.069456652                               |
| 55.72074498                              | 129.5006905                                       | 0.779646116                             | 0.084055951                               |
| 73.80587573                              | 164.9079819                                       | -0.022919661                            | 0.063993884                               |
| 77.58587189                              | 146.5364456                                       | -0.255096949                            | 0.064268844                               |
| 75.19879066                              | 141.2366199                                       | 0.561021163                             | 0.068993084                               |
| 32.9747231                               | 119.4964886                                       | 0.188958162                             | 0.087309726                               |
| 68.63498951                              | 134.6373339                                       | 0.070072768                             | 0.075322607                               |
| 22.69069214                              | 69.15207744                                       | 0.202019066                             | 0.129505956                               |
| 79.86318613                              | 133.329145                                        | -0.160184732                            | 0.065938074                               |
| 57.40383094                              | 137.0229568                                       | -0.513547516                            | 0.067528996                               |
| 40.63099453                              | 130.5709772                                       | 0.105840708                             | 0.083832357                               |
| 59.57340132                              | 124.9737968                                       | -0.564098057                            | 0.079586891                               |
| 77.00602403                              | 150.6419334                                       | 0.0752961                               | 0.063826104                               |
| 59.40737232                              | 120.1456299                                       | -0.700732604                            | 0.074735249                               |
| 62.31359205                              | 128.2778777                                       | -0.422007036                            | 0.070589317                               |
| 100.4649454                              | 168.2677002                                       | 0.351949305                             | 0.057322633                               |
| 43.81660098                              | 105.3528681                                       | -0.770159274                            | 0.087237724                               |
| 33.52908                                 | 110.7693615                                       | -0.358998252                            | 0.0883627                                 |
| 62.06406046                              | 138.488698                                        | 0.861782712                             | 0.089506671                               |
| 48.14880379                              | 130.1039066                                       | 0.130613349                             | 0.079007869                               |
| 133.8966532                              | 163.1263781                                       | -1.08927019                             | 0.059562001                               |
| 120.0454021                              | 164.7426758                                       | -0.691185634                            | 0.056269007                               |
| 40.93204453                              | 92.47131062                                       | -0.757754057                            | 0.094783372                               |
| 71.14899409                              | 125.9694214                                       | -0.19595818                             | 0.068161931                               |
| 59.43158831                              | 116.4285812                                       | -0.774849994                            | 0.077926862                               |
| 103.4050017                              | 161.3992863                                       | -0.306506792                            | 0.055907648                               |
| 49.77711696                              | 135.1773996                                       | 0.480667046                             | 0.085769894                               |
| 84.28934183                              | 131.7820778                                       | -0.592160766                            | 0.066502819                               |
| 57.07826838                              | 146.7453537                                       | 0.069430754                             | 0.069621805                               |
| 50.03813917                              | 133.1152229                                       | 0.213647371                             | 0.078810393                               |
| 59.14042558                              | 124.8474274                                       | -0.223356348                            | 0.075050267                               |
| 60.53318145                              | 187.169487                                        | 0.459991335                             | 0.095139072                               |
| 90.8531253                               | 154.4441566                                       | 0.167399069                             | 0.058626446                               |
| 55.84818679                              | 114.6559982                                       | -0.678188909                            | 0.077400854                               |
| 51.07528297                              | 122.3623486                                       | 0.028770643                             | 0.077342516                               |
| 50.57345028                              | 122.8469105                                       | -0.171536221                            | 0.075937977                               |
| 98.43837985                              | 150.445775                                        | -0.17926379                             | 0.066386373                               |
| 96.30506749                              | 160.9803419                                       | -0.156280618                            | 0.057626064                               |
| 72.91358826                              | 78.61157811                                       | -1.75495735                             | 0.104055887                               |
| 27.20543107                              | 91.54181194                                       | -0.029636372                            | 0.102369903                               |
| 54.88608958                              | 152.5716038                                       | 0.193019579                             | 0.068879054                               |

| log.sigma.5.0.mm.3D_firstorder_MeanAbsoluteDeviation | log.sigma.5.0.mm.3D_firstorder_Energy | log.sigma.5.0.mm.3D_firstorder_RobustMeanAbsoluteDeviation | log.sigma.5.0.mm.3D_firstorder_Median |
|------------------------------------------------------|---------------------------------------|------------------------------------------------------------|---------------------------------------|
| 104.212625                                           | 48208831.66                           | 67.91299309                                                | 75.32590866                           |
| 69.27130513                                          | 17567864.23                           | 51.46366221                                                | 86.57810974                           |
| 95.58381471                                          | 58748843.78                           | 69.88832294                                                | 147.0574417                           |
| 101.2252415                                          | 20672089.34                           | 68.70622336                                                | 66.21881104                           |
| 73.90787187                                          | 39118887.23                           | 51.59609789                                                | 77.32764435                           |
| 86.48345855                                          | 14801146.83                           | 67.10359356                                                | 83.9004631                            |
| 89.96349098                                          | 170820282.5                           | 63.89520931                                                | 125.9404449                           |
| 86.93633382                                          | 150689338                             | 57.25789185                                                | 113.1200981                           |
| 92.18376228                                          | 141048491.9                           | 64.90219926                                                | 125.399128                            |
| 86.20344354                                          | 36422530.4                            | 61.7648053                                                 | 150.2852325                           |
| 75.33208143                                          | 27063328.59                           | 55.65176163                                                | 95.93068314                           |
| 87.56931368                                          | 72980679.24                           | 63.12192851                                                | 131.0709534                           |
| 75.63937588                                          | 32857980.22                           | 45.14504667                                                | 68.30427551                           |
| 86.70442865                                          | 39186681.64                           | 56.097871                                                  | 85.70357513                           |
| 81.17890387                                          | 40920276.57                           | 51.43985839                                                | 97.38632584                           |
| 96.6994399                                           | 142402289.6                           | 66.55994098                                                | 138.1604614                           |
| 71.52357299                                          | 18963031.48                           | 45.15406698                                                | 100.3677101                           |
| 77.73650424                                          | 21214869.95                           | 55.93901579                                                | 61.90759659                           |
| 66.94090958                                          | 19154722.15                           | 50.57300488                                                | 72.85160446                           |
| 96.93972907                                          | 195802906.2                           | 67.36266868                                                | 146.2817078                           |
| 68.11760201                                          | 60766019.78                           | 48.06419162                                                | 101.9746513                           |
| 75.16525029                                          | 20499847.02                           | 55.44814955                                                | 97.52207184                           |
| 84.4164024                                           | 25433634.62                           | 61.30266055                                                | 100.7687378                           |
| 72.92811267                                          | 52624131.03                           | 49.42615257                                                | 95.75847626                           |
| 76.21538973                                          | 33428119.37                           | 51.31424868                                                | 131.0805511                           |
| 87.37639253                                          | 66169932.36                           | 54.49012491                                                | 127.2166367                           |
| 94.31747912                                          | 95221539.62                           | 58.0919322                                                 | 118.3764954                           |
| 72.55754819                                          | 49292612.9                            | 48.14239702                                                | 84.44165802                           |
| 71.4937083                                           | 8755323.212                           | 53.29741063                                                | 93.9968338                            |
| 64.82224408                                          | 43429125.23                           | 43.90268749                                                | 113.4377823                           |
| 85.72255637                                          | 137528857.2                           | 60.55312114                                                | 122.4457397                           |
| 52.71533572                                          | 15295441.24                           | 30.48256518                                                | 50.09015656                           |
| 104.9544489                                          | 78234200.13                           | 70.48567844                                                | 86.56443024                           |
| 94.11176928                                          | 63685824.17                           | 60.64144157                                                | 119.4598923                           |
| 82.59578568                                          | 139738301.6                           | 58.22894048                                                | 141.0346832                           |
| 76.13017731                                          | 80969714                              | 54.66276156                                                | 133.1264954                           |
| 70.64129964                                          | 57417459.11                           | 39.27267185                                                | 62.9210434                            |
| 116.9579697                                          | 171967435                             | 82.06035246                                                | 108.5243301                           |
| 42.93514209                                          | 111110485.12                          | 30.69973087                                                | 80.20954132                           |
| 109.4914425                                          | 190293230.5                           | 76.25515064                                                | 83.1504631                            |
| 73.97410179                                          | 34451688.23                           | 44.26841746                                                | 71.84618759                           |
| 98.00085097                                          | 84450213.54                           | 65.43517329                                                | 71.80916595                           |
| 91.3433012                                           | 120827973.5                           | 61.9532095                                                 | 127.9806137                           |
| 74.28747666                                          | 41038586.48                           | 49.39514598                                                | 84.51738358                           |
| 81.82585438                                          | 43018404.23                           | 58.88120204                                                | 130.0278931                           |
| 92.58738133                                          | 100927805.6                           | 64.49357616                                                | 152.8532867                           |
| 75.27979886                                          | 113214679.1                           | 51.49595593                                                | 118.9344902                           |
| 66.12334237                                          | 13776484.72                           | 50.7968647                                                 | 80.99636841                           |
| 84.9772137                                           | 17602490.21                           | 58.71623183                                                | 84.02480316                           |
| 70.27483694                                          | 29953563.01                           | 52.94849342                                                | 118.2707558                           |
| 94.66245552                                          | 95369037.88                           | 67.46655676                                                | 150.7050171                           |
| 93.88698573                                          | 90032709.2                            | 64.93424985                                                | 108.6694565                           |
| 79.35250785                                          | 88730546.52                           | 54.05901284                                                | 87.88471603                           |
| 78.96464476                                          | 42517877.92                           | 57.57195838                                                | 165.6226349                           |
| 93.5358517                                           | 48214896.67                           | 71.76167657                                                | 149.8500977                           |
| 69.1909746                                           | 34748935.94                           | 46.63140458                                                | 93.68249512                           |
| 95.40229511                                          | 120625939.4                           | 66.59690618                                                | 126.7784653                           |
| 82.05091343                                          | 77605495.67                           | 50.64212467                                                | 104.8119965                           |
| 58.38091396                                          | 14469688.46                           | 39.20803061                                                | 54.36913109                           |
| 85.56620727                                          | 167715626.2                           | 59.05827461                                                | 74.25245667                           |
| 78.96853384                                          | 35850448.1                            | 54.09722553                                                | 78.68780518                           |
| 91.71584487                                          | 82777838.11                           | 67.18588541                                                | 123.7708511                           |
| 89.74402659                                          | 203108201.5                           | 60.83707052                                                | 143.5452576                           |
| 90.3201323                                           | 181378414.8                           | 61.55464771                                                | 81.80539703                           |
| 66.95081943                                          | 19728074.82                           | 48.53368263                                                | 131.8704758                           |
| 84.54596751                                          | 86160304.92                           | 56.6739033                                                 | 86.04930878                           |
| 47.15415591                                          | 8090905.451                           | 30.28091611                                                | 40.26819229                           |
| 89.85224425                                          | 125646763.2                           | 57.36441232                                                | 74.21603012                           |
| 86.20082191                                          | 146304631.4                           | 57.34761096                                                | 117.973587                            |
| 70.62701058                                          | 59438673.17                           | 52.52248883                                                | 105.3666458                           |
| 78.61654647                                          | 26012030.17                           | 51.38994275                                                | 89.01876068                           |
| 91.94924871                                          | 159612048.1                           | 62.72641223                                                | 142.133522                            |
| 79.00631037                                          | 57332947.76                           | 50.70208758                                                | 125.5474014                           |
| 82.50046628                                          | 29900798.11                           | 55.03086071                                                | 54.04545593                           |
| 102.8131788                                          | 72787296.11                           | 71.2146664                                                 | 63.59296036                           |
| 67.64124794                                          | 20034586.99                           | 44.66823464                                                | 93.91366577                           |
| 65.66558471                                          | 48113624.68                           | 45.48201314                                                | 118.2031555                           |
| 83.37263633                                          | 20883167.33                           | 58.76778497                                                | 72.72561264                           |
| 74.33491032                                          | 38585229.03                           | 53.8328984                                                 | 109.1364059                           |
| 111.0611095                                          | 56350197.61                           | 69.82423367                                                | 71.09803772                           |
| 107.5039316                                          | 48135082.05                           | 68.90193199                                                | 75.83676147                           |
| 65.51200873                                          | 19309152.66                           | 39.42780803                                                | 53.14927292                           |
| 86.49620353                                          | 89551285.59                           | 55.45162375                                                | 121.8152847                           |
| 76.21406661                                          | 55482113.63                           | 49.8327754                                                 | 98.14971161                           |
| 103.2041776                                          | 72053278.61                           | 68.94015953                                                | 116.0083542                           |
| 76.94149696                                          | 34104819.11                           | 56.27637485                                                | 93.63201141                           |
| 90.94251593                                          | 37693284.71                           | 58.45200134                                                | 52.72166061                           |
| 83.44010631                                          | 88377515.44                           | 59.39217364                                                | 137.0428696                           |
| 75.03363035                                          | 32005695.34                           | 53.88763412                                                | 103.6120949                           |
| 79.25423906                                          | 46389785.95                           | 52.32073297                                                | 105.7876892                           |
| 90.50561151                                          | 31731502.59                           | 74.84671391                                                | 82.65011978                           |
| 98.33392859                                          | 75758080.13                           | 67.72734131                                                | 123.288147                            |
| 76.04429036                                          | 81191767.98                           | 49.00116055                                                | 76.01515961                           |
| 74.742722                                            | 82390690.02                           | 50.90919977                                                | 120.4622269                           |
| 74.33652008                                          | 55701681.52                           | 51.37884744                                                | 65.61020279                           |
| 98.0503563                                           | 97394314.44                           | 64.86056413                                                | 89.21548462                           |
| 99.44550741                                          | 69420704.53                           | 67.07736743                                                | 96.8019104                            |
| 74.86318673                                          | 13541770.12                           | 38.11533545                                                | 32.05021667                           |
| 55.3028673                                           | 9332430.103                           | 38.33863606                                                | 77.94147491                           |
| 83.18985405                                          | 167527222.1                           | 61.03790277                                                | 129.570961                            |

| log.sigma.5.0.mm.3D_firstorder_TotalEnergy | log.sigma.5.0.mm.3D_firstorder_Maximum | log.sigma.5.0.mm.3D_firstorder_RootMeanSquared | log.sigma.5.0.mm.3D_firstorder_90Percentile | log.sigma.5.0.mm.3D_firstorder_Minimum |
|--------------------------------------------|----------------------------------------|------------------------------------------------|---------------------------------------------|----------------------------------------|
| 1301638455                                 | 409.8231506                            | 150.7268467                                    | 227.0269913                                 | -435.0421448                           |
| 474332334.2                                | 313.5896301                            | 137.0735554                                    | 238.4551575                                 | -78.85006714                           |
| 1586218782                                 | 448.4247742                            | 195.698268                                     | 323.7727997                                 | -163.6744385                           |
| 558146412.3                                | 348.5135193                            | 145.4604426                                    | 232.5004456                                 | -290.3502808                           |
| 1056209955                                 | 359.9114999                            | 128.5293754                                    | 220.9859207                                 | -184.9482269                           |
| 399630964.4                                | 413.3010864                            | 149.7530636                                    | 252.719458                                  | -78.15958405                           |
| 4612147628                                 | 623.9254761                            | 173.862958                                     | 283.7952881                                 | -202.6932373                           |
| 4068612125                                 | 470.7797546                            | 171.7575427                                    | 288.8197235                                 | -417.9616089                           |
| 3808309281                                 | 475.2122803                            | 176.1446706                                    | 290.6478424                                 | -256.4872437                           |
| 983408320.7                                | 381.2938538                            | 184.3264524                                    | 287.9522339                                 | -334.1004333                           |
| 730709871.9                                | 372.1412354                            | 133.9645639                                    | 220.186499                                  | -172.694809                            |
| 1970478340                                 | 436.7635193                            | 177.9379102                                    | 287.6408203                                 | -202.9585266                           |
| 887165466                                  | 383.1476746                            | 132.6625292                                    | 231.1386993                                 | -265.0482483                           |
| 1058040404                                 | 431.5717773                            | 151.072041                                     | 253.8530914                                 | -344.8326111                           |
| 1104847467                                 | 486.18573                              | 163.6145515                                    | 218.6434906                                 | -227.3699646                           |
| 3844861819                                 | 434.9825134                            | 180.3930616                                    | 287.4785461                                 | -294.2440796                           |
| 512001849.9                                | 261.3518372                            | 126.023553                                     | 188.0163589                                 | -262.173584                            |
| 572801488.7                                | 333.4135132                            | 131.1712474                                    | 242.352002                                  | -113.1967773                           |
| 517177498.2                                | 298.4107056                            | 121.4788249                                    | 213.3936859                                 | -74.59235382                           |
| 5286678467                                 | 569.8655396                            | 194.066091                                     | 311.9947693                                 | -226.4828949                           |
| 1640682534                                 | 354.8451538                            | 141.7553641                                    | 236.3405472                                 | -198.1535034                           |
| 553495869.5                                | 348.7361145                            | 173.8366114                                    | 231.0506866                                 | -120.3358307                           |
| 686708134.6                                | 373.2736511                            | 157.5992824                                    | 271.7878845                                 | -102.2191086                           |
| 1420851538                                 | 448.2885132                            | 140.9988265                                    | 237.4104034                                 | -217.905777                            |
| 902559222.9                                | 433.8612366                            | 162.0472892                                    | 249.9428955                                 | -295.0223389                           |
| 1786588174                                 | 460.1531677                            | 167.1274608                                    | 262.2771851                                 | -366.7952576                           |
| 2570981570                                 | 553.6195068                            | 171.6187551                                    | 262.5699402                                 | -468.3652344                           |
| 1330900548                                 | 365.8105469                            | 133.5915789                                    | 228.3398438                                 | -254.855298                            |
| 236393726.7                                | 322.043396                             | 139.9530379                                    | 239.5481659                                 | -62.34758759                           |
| 1172586381                                 | 378.9101563                            | 145.4086764                                    | 237.7818329                                 | -175.1823425                           |
| 3713279143                                 | 492.9070129                            | 170.014005                                     | 281.4508759                                 | -298.6500244                           |
| 412976913.6                                | 212.3261261                            | 85.98065707                                    | 113.9790375                                 | -349.565918                            |
| 2112323404                                 | 460.9305725                            | 155.6554391                                    | 244.5353607                                 | -326.7384033                           |
| 1719517253                                 | 479.0179443                            | 164.6218415                                    | 250.2406204                                 | -358.9237061                           |
| 3772934144                                 | 445.7700195                            | 178.1287725                                    | 283.1348877                                 | -302.6788635                           |
| 2186182278                                 | 354.9596558                            | 164.3134331                                    | 261.3613708                                 | -270.5637512                           |
| 1550271396                                 | 415.3492737                            | 124.2201788                                    | 179.4290161                                 | -548.2271729                           |
| 4643120745                                 | 544.857666                             | 182.5392145                                    | 298.970459                                  | -416.2590332                           |
| 299983098.2                                | 243.3869476                            | 95.0164735                                     | 148.3787308                                 | -72.86873627                           |
| 5137917224                                 | 518.3686523                            | 161.7873137                                    | 267.7451965                                 | -284.3407593                           |
| 930195582.2                                | 324.8529968                            | 115.244516                                     | 156.0114349                                 | -413.8152771                           |
| 2280155766                                 | 617.0720215                            | 147.7791928                                    | 234.0232788                                 | -326.0203552                           |
| 3262355284                                 | 465.8435059                            | 181.8690967                                    | 297.0839111                                 | -275.132782                            |
| 1108041835                                 | 505.4355469                            | 128.4313385                                    | 208.9407318                                 | -238.2658234                           |
| 1161496914                                 | 445.9264526                            | 183.4685891                                    | 306.8004578                                 | -82.68296051                           |
| 2725050750                                 | 509.0961914                            | 191.7495003                                    | 294.4381592                                 | -291.9636841                           |
| 3056796335                                 | 433.875946                             | 157.5337929                                    | 253.8349518                                 | -295.7228241                           |
| 371965087.3                                | 272.4507141                            | 125.7650969                                    | 115.2352753                                 | -41.81592941                           |
| 475267235.7                                | 414.7692871                            | 143.8209906                                    | 243.1473999                                 | -183.8179626                           |
| 808746201.3                                | 422.3338013                            | 148.845565                                     | 231.5303284                                 | -77.51244354                           |
| 2574964023                                 | 444.3875122                            | 192.67335                                      | 305.4131592                                 | -220.1144257                           |
| 2430883148                                 | 473.2513428                            | 163.4258615                                    | 273.0516968                                 | -245.7054596                           |
| 2395724756                                 | 406.4135742                            | 140.2335837                                    | 240.096492                                  | -201.8507538                           |
| 1147982704                                 | 413.1446533                            | 196.2461989                                    | 302.5484406                                 | -149.3611603                           |
| 1301802210                                 | 462.9403687                            | 190.3990599                                    | 306.2244263                                 | -95.06072235                           |
| 938221270.4                                | 379.5827332                            | 133.4914497                                    | 221.7596497                                 | -298.775238                            |
| 3256900365                                 | 485.703125                             | 172.6875752                                    | 281.1504272                                 | -263.3457031                           |
| 2095348383                                 | 351.0944824                            | 149.8075647                                    | 231.0647781                                 | -407.1913757                           |
| 390681588.4                                | 268.5452881                            | 93.70245868                                    | 149.8708984                                 | -291.6601563                           |
| 4528321906                                 | 474.9469299                            | 153.5423966                                    | 216.6845764                                 | -320.5216675                           |
| 967962098.6                                | 450.3730774                            | 142.4793563                                    | 248.6345215                                 | -179.7867584                           |
| 2235001629                                 | 444.8616333                            | 176.076505                                     | 288.2326447                                 | -237.4148254                           |
| 5483921440                                 | 563.8768921                            | 187.3104277                                    | 293.9632385                                 | -466.7939148                           |
| 4897217201                                 | 513.2178345                            | 154.2516581                                    | 275.5305664                                 | -317.1400757                           |
| 532658020                                  | 392.428894                             | 158.0260947                                    | 233.8507645                                 | -151.9791565                           |
| 2326328233                                 | 495.247406                             | 149.3645308                                    | 250.2492447                                 | -367.711792                            |
| 218454447.2                                | 260.2237854                            | 78.76980446                                    | 129.6172333                                 | -215.2537079                           |
| 3392462607                                 | 512.5562134                            | 141.7867487                                    | 232.3078171                                 | -401.2012939                           |
| 3950225048                                 | 432.2017517                            | 158.0488809                                    | 248.9405365                                 | -311.9757996                           |
| 1604844175                                 | 334.9815369                            | 143.213963                                     | 233.605014                                  | -184.8466339                           |
| 702324814.6                                | 416.3461304                            | 141.508507                                     | 218.0962891                                 | -300.7116089                           |
| 4309525299                                 | 501.1512451                            | 192.8875466                                    | 316.8317719                                 | -327.7770996                           |
| 1547989590                                 | 378.5046387                            | 158.6097838                                    | 246.0598846                                 | -335.6247864                           |
| 807321549.1                                | 325.2407837                            | 115.049113                                     | 170.7467255                                 | -322.1875305                           |
| 1965256995                                 | 483.4590149                            | 152.4706527                                    | 267.4984436                                 | -263.2792053                           |
| 540933848.6                                | 289.1794127                            | 122.1838875                                    | 191.8548508                                 | -289.723999                            |
| 1299067866                                 | 360.0663147                            | 141.7067805                                    | 218.4752274                                 | -204.1210632                           |
| 563845517.9                                | 432.7475891                            | 147.6438732                                    | 261.5313751                                 | -103.2822571                           |
| 1041801184                                 | 363.4201355                            | 150.3466587                                    | 248.9406799                                 | -163.4874725                           |
| 1521455336                                 | 440.5978088                            | 155.2146146                                    | 193.0343964                                 | -516.5167236                           |
| 1299647215                                 | 409.8231506                            | 155.5655636                                    | 227.8322083                                 | -475.6388855                           |
| 521347121.7                                | 411.0293579                            | 130.6014959                                    | 147.8124878                                 | -393.8466797                           |
| 2417884711                                 | 460.3628235                            | 165.5116058                                    | 266.9670471                                 | -292.5394592                           |
| 1498017068                                 | 395.017395                             | 134.3678037                                    | 203.2774323                                 | -332.2674561                           |
| 1945438522                                 | 545.3114014                            | 171.8782699                                    | 272.3316284                                 | -332.891571                            |
| 920830115.9                                | 371.9564209                            | 149.2033219                                    | 261.6114929                                 | -130.8283691                           |
| 1017718687                                 | 352.9217529                            | 125.7152029                                    | 177.3137299                                 | -364.7984924                           |
| 2386192917                                 | 484.9552002                            | 179.530057                                     | 286.2408905                                 | -286.8311768                           |
| 864153774.3                                | 377.5484009                            | 147.8574102                                    | 242.0152161                                 | -133.8815918                           |
| 1252524221                                 | 393.3499756                            | 151.3556615                                    | 244.9574829                                 | -223.6217804                           |
| 856750570.1                                | 335.0726318                            | 155.9935075                                    | 271.6394409                                 | -103.7059555                           |
| 2045468164                                 | 518.8598633                            | 178.3378808                                    | 292.9064911                                 | -221.2043762                           |
| 2192177735                                 | 363.2440491                            | 125.159954                                     | 194.4458069                                 | -421.3239441                           |
| 2224548630                                 | 442.7088013                            | 158.0091003                                    | 251.6425842                                 | -213.9458008                           |
| 1503945401                                 | 386.0390625                            | 113.1331057                                    | 180.2582901                                 | -274.9584351                           |
| 2629646490                                 | 480.2825928                            | 168.7045516                                    | 289.1020355                                 | -498.1465149                           |
| 1874359022                                 | 448.2355957                            | 156.9824436                                    | 255.3905029                                 | -257.4044189                           |
| 365627793.3                                | 250.9203339                            | 113.7272081                                    | 117.1732803                                 | -468.9764404                           |
| 251975612.8                                | 271.0614319                            | 105.7826269                                    | 171.364444                                  | -134.475296                            |
| 4523234998                                 | 446.0716248                            | 170.3351604                                    | 272.6492279                                 | -207.6784058                           |

| log.sigma.5.0.mm.3D_firstorder_Entropy | log.sigma.5.0.mm.3D_firstorder_StandardDeviation | log.sigma.5.0.mm.3D_firstorder_Range | log.sigma.5.0.mm.3D_firstorder_Variance | log.sigma.5.0.mm.3D_firstorder_10Percentile |
|----------------------------------------|--------------------------------------------------|--------------------------------------|-----------------------------------------|---------------------------------------------|
| 4.439350947                            | 136.505965                                       | 844.8652954                          | 18633.87849                             | -119.6540024                                |
| 3.596264774                            | 82.80663161                                      | 392.4396973                          | 6856.938238                             | 15.52327785                                 |
| 4.213143985                            | 116.3346667                                      | 612.0992126                          | 13533.75467                             | 15.86667099                                 |
| 4.324148267                            | 130.3010929                                      | 638.8638                             | 16978.37481                             | -121.8496765                                |
| 3.897050287                            | 92.33186867                                      | 544.859726                           | 8525.173973                             | -21.01173515                                |
| 3.875731187                            | 100.3886794                                      | 491.4606705                          | 10077.88695                             | -0.80240891                                 |
| 4.189615619                            | 111.8485068                                      | 826.6187134                          | 12510.08848                             | -4.250810146                                |
| 4.145723761                            | 113.6614919                                      | 888.7413635                          | 12918.93474                             | 10.13525229                                 |
| 4.232468368                            | 114.9896915                                      | 731.6995239                          | 13222.62915                             | -8.516824245                                |
| 4.079191632                            | 108.1771967                                      | 715.3942871                          | 11702.30589                             | 20.36866684                                 |
| 3.880692725                            | 91.43468461                                      | 544.8360443                          | 8360.301549                             | -14.75652084                                |
| 4.115705276                            | 107.6624923                                      | 639.7220459                          | 11591.21224                             | 14.6922266                                  |
| 3.934381669                            | 103.5496032                                      | 648.1959229                          | 10722.52033                             | -22.99997711                                |
| 4.131463472                            | 114.1409333                                      | 776.4043884                          | 13028.15266                             | -14.54085903                                |
| 4.103043709                            | 108.4971911                                      | 713.5556946                          | 11771.64048                             | -46.04283104                                |
| 4.296292938                            | 121.8261576                                      | 729.226593                           | 14841.61268                             | -23.54590607                                |
| 3.792779258                            | 94.78310258                                      | 523.5254211                          | 8983.836535                             | -49.04039116                                |
| 3.74723904                             | 94.0990202                                       | 446.6102905                          | 8854.625602                             | -5.787828159                                |
| 3.583431714                            | 79.48365                                         | 373.0030594                          | 6317.650618                             | -0.595531535                                |
| 4.321103916                            | 121.7827815                                      | 796.3484344                          | 14831.04587                             | 1.646044064                                 |
| 3.75267135                             | 84.89814632                                      | 552.9986572                          | 7207.695249                             | 15.92873697                                 |
| 3.874196255                            | 90.64914271                                      | 469.0719452                          | 8217.267074                             | -8.401659203                                |
| 3.982694869                            | 102.166913                                       | 475.4927597                          | 10438.07811                             | 0.480649859                                 |
| 3.911138653                            | 93.35019728                                      | 666.1942902                          | 8714.259333                             | -3.121600056                                |
| 3.997001866                            | 98.13778193                                      | 728.8835754                          | 9631.024242                             | 2.982137346                                 |
| 4.205123574                            | 118.4161574                                      | 826.9484253                          | 14022.38634                             | -29.02367859                                |
| 4.305178015                            | 130.5092351                                      | 1021.984741                          | 17032.66045                             | -27.58838272                                |
| 3.887744916                            | 93.74122609                                      | 620.6660767                          | 8787.417469                             | -8.835349655                                |
| 3.676135084                            | 85.8288846                                       | 384.3909836                          | 7366.591227                             | 12.38452873                                 |
| 3.7431201                              | 82.82180507                                      | 554.0924988                          | 6859.451395                             | 19.83157635                                 |
| 4.116651687                            | 107.1263751                                      | 791.5570374                          | 11476.06023                             | 10.93408041                                 |
| 3.401553512                            | 76.41080404                                      | 561.8920441                          | 5838.610974                             | -42.26051407                                |
| 4.424354692                            | 135.282519                                       | 787.689758                           | 18301.35996                             | -123.1056137                                |
| 4.289474982                            | 123.5956321                                      | 837.9416504                          | 15275.88027                             | -57.3472065                                 |
| 4.082099852                            | 103.7753591                                      | 748.4488831                          | 10769.32515                             | 19.76748829                                 |
| 3.920854649                            | 94.58484641                                      | 625.523407                           | 8946.29317                              | 24.09964256                                 |
| 3.887846588                            | 107.025046                                       | 963.5764465                          | 11454.36048                             | -26.56380844                                |
| 4.558654538                            | 146.440939                                       | 961.1166992                          | 21444.94861                             | -76.54616547                                |
| 3.135988579                            | 53.12286048                                      | 316.2556839                          | 2822.038306                             | 8.131388569                                 |
| 4.496736152                            | 137.3579315                                      | 802.7094116                          | 18867.20135                             | -94.19281235                                |
| 3.892842187                            | 102.568276                                       | 738.6682739                          | 10520.25124                             | -75.44986572                                |
| 4.37390044                             | 127.1216615                                      | 943.0923767                          | 16159.91682                             | -80.91473694                                |
| 4.228616348                            | 116.335604                                       | 740.9762878                          | 13533.97276                             | 2.255735397                                 |
| 3.96541839                             | 96.62258079                                      | 743.7013072                          | 9335.923119                             | -40.25599365                                |
| 3.896903792                            | 99.58372595                                      | 528.6094131                          | 9916.918475                             | 43.01569176                                 |
| 4.24629588                             | 117.3079223                                      | 801.0598755                          | 13761.14863                             | 8.070970535                                 |
| 3.966895812                            | 95.59856606                                      | 669.5987701                          | 9139.085833                             | 12.27465296                                 |
| 3.513343803                            | 77.41940407                                      | 314.2666435                          | 5993.764127                             | 7.373445034                                 |
| 4.04883844                             | 105.9694244                                      | 598.5872498                          | 11229.5189                              | -24.72575188                                |
| 3.718534448                            | 84.3668599                                       | 499.8462448                          | 7117.76705                              | 23.35789261                                 |
| 4.250438735                            | 116.8518429                                      | 664.5019379                          | 13654.35319                             | 7.420923138                                 |
| 4.27149117                             | 118.2417843                                      | 718.9568024                          | 13981.11956                             | -36.748703                                  |
| 4.030663189                            | 101.0003486                                      | 608.264328                           | 10201.07041                             | -22.60415039                                |
| 3.962126748                            | 96.26267027                                      | 562.5058136                          | 9266.501688                             | 52.00074806                                 |
| 4.103339104                            | 110.3802885                                      | 558.001091                           | 12183.8081                              | 19.37001171                                 |
| 3.843637337                            | 89.14033192                                      | 678.3579712                          | 7945.998776                             | -8.749777317                                |
| 4.291471448                            | 119.2659058                                      | 749.0488281                          | 14224.35628                             | -23.7794693                                 |
| 4.08804513                             | 113.5645428                                      | 758.2858582                          | 12896.90538                             | -24.63840122                                |
| 3.605422847                            | 75.58302473                                      | 560.2054443                          | 5712.793627                             | -32.6956871                                 |
| 4.128145898                            | 108.3314307                                      | 795.4685974                          | 11735.69888                             | -40.76005402                                |
| 3.890049341                            | 99.04639275                                      | 630.1598358                          | 9810.187917                             | -3.444142818                                |
| 4.164926015                            | 112.0876456                                      | 682.2764587                          | 12563.6403                              | 3.501272225                                 |
| 4.235674653                            | 116.1869294                                      | 1030.670807                          | 13499.40256                             | 11.77567978                                 |
| 4.157870265                            | 114.9198549                                      | 830.3579102                          | 13206.57305                             | -23.65712662                                |
| 3.71483158                             | 82.07768102                                      | 544.4080505                          | 6736.745722                             | 30.12110958                                 |
| 4.084947971                            | 109.2800819                                      | 862.959198                           | 11942.13631                             | -8.240289593                                |
| 3.299417241                            | 62.87202372                                      | 475.4774933                          | 3952.891367                             | -22.56784039                                |
| 4.262240115                            | 120.2210503                                      | 919.7575073                          | 14453.10094                             | -64.5055336                                 |
| 4.159893196                            | 111.8493298                                      | 744.1775513                          | 12510.27258                             | -30.48868713                                |
| 3.762608796                            | 85.15377554                                      | 519.8281708                          | 7251.165488                             | 15.64764252                                 |
| 3.999221575                            | 105.0737752                                      | 717.0577393                          | 11040.49824                             | -12.6552948                                 |
| 4.241299737                            | 117.7007655                                      | 828.9283447                          | 13853.4702                              | 21.18409443                                 |
| 4.046733983                            | 105.1987636                                      | 714.129425                           | 11066.77987                             | -7.03179493                                 |
| 4.100987727                            | 106.2445281                                      | 647.4283142                          | 11287.89974                             | -95.57867279                                |
| 4.368353789                            | 129.5237131                                      | 746.7382202                          | 16776.39226                             | -74.51146698                                |
| 3.788338675                            | 88.30519582                                      | 578.9034119                          | 7797.807609                             | -31.14398098                                |
| 3.748256875                            | 83.06516279                                      | 564.1873779                          | 6899.821269                             | 14.33146572                                 |
| 3.844593279                            | 101.8933279                                      | 526.9029862                          | 10382.25027                             | 6.617065096                                 |
| 3.869864925                            | 90.81736429                                      | 536.907608                           | 8247.793656                             | 12.18769798                                 |
| 4.433189263                            | 148.8562583                                      | 957.1145325                          | 22158.18564                             | -161.7320404                                |
| 4.477900313                            | 142.875337                                       | 885.4620361                          | 20413.36192                             | -125.235585                                 |
| 3.798138721                            | 92.23407224                                      | 804.8760376                          | 8507.124083                             | -51.27557526                                |
| 4.199793413                            | 114.1930182                                      | 752.9022827                          | 13040.0454                              | -26.76487694                                |
| 3.983474989                            | 100.8427542                                      | 727.2848511                          | 10169.26106                             | -30.40940933                                |
| 4.430762835                            | 133.0144925                                      | 878.2029724                          | 17692.85521                             | -67.25500793                                |
| 3.793137019                            | 92.81501562                                      | 502.78479                            | 8614.627124                             | 17.7764822                                  |
| 4.226603731                            | 119.6049103                                      | 717.7202454                          | 14305.33456                             | -135.7113983                                |
| 4.076459717                            | 103.8853601                                      | 771.786377                           | 10792.16805                             | 21.99071522                                 |
| 3.885903381                            | 92.29077277                                      | 511.4299927                          | 8517.586738                             | 5.136643791                                 |
| 4.036714839                            | 103.0704693                                      | 616.971756                           | 10623.52163                             | -9.679225922                                |
| 3.652350116                            | 101.3942813                                      | 438.7785873                          | 10280.80027                             | 9.495256042                                 |
| 4.334303778                            | 124.1379123                                      | 740.0642395                          | 15410.22127                             | -28.63263321                                |
| 4.009889308                            | 101.8521676                                      | 784.5679932                          | 10373.86405                             | -50.58912201                                |
| 3.9646273                              | 95.67430924                                      | 656.6546021                          | 9153.573448                             | 9.97834177                                  |
| 3.947829097                            | 93.75493123                                      | 660.9974976                          | 8789.98713                              | -61.2788208                                 |
| 4.277191322                            | 129.2127478                                      | 978.4291077                          | 16695.9342                              | -16.55539112                                |
| 4.359192736                            | 127.2634183                                      | 705.6400146                          | 16195.97763                             | -82.0817276                                 |
| 3.791012408                            | 112.9935428                                      | 719.8967743                          | 12767.54072                             | -120.489595                                 |
| 3.504651984                            | 69.27051905                                      | 405.5367279                          | 4798.40481                              | -6.716440392                                |
| 4.038965268                            | 101.0734225                                      | 653.7500305                          | 10215.83673                             | 14.02027092                                 |

| log.sigma.5.0.mm.3D_firstorder_Kurtosis | log.sigma.5.0.mm.3D_firstorder_Mean | log.sigma.5.0.mm.3D_glrIm_ShortRunLowGrayLevelEmphasis | log.sigma.5.0.mm.3D_glrIm_GrayLevelVariance |
|-----------------------------------------|-------------------------------------|--------------------------------------------------------|---------------------------------------------|
| 3.508826522                             | 63.91168764                         | 0.004007037                                            | 30.6955908                                  |
| 2.306224739                             | 109.2347077                         | 0.019161477                                            | 11.31393728                                 |
| 2.432959205                             | 157.3659984                         | 0.008827972                                            | 21.71677514                                 |
| 2.890488234                             | 64.65574654                         | 0.015656911                                            | 28.27808194                                 |
| 2.786232633                             | 89.4126746                          | 0.009588052                                            | 13.98889088                                 |
| 2.273418231                             | 111.121974                          | 0.026155164                                            | 16.60268844                                 |
| 3.162925939                             | 133.1098783                         | 0.006249737                                            | 20.38462333                                 |
| 3.905747728                             | 128.7700227                         | 0.002607232                                            | 21.82632291                                 |
| 2.880391946                             | 133.4328139                         | 0.004970443                                            | 21.62318354                                 |
| 3.699505661                             | 149.2445481                         | 0.003898113                                            | 19.02060258                                 |
| 2.539412816                             | 97.90915595                         | 0.012604653                                            | 13.44129407                                 |
| 2.744509675                             | 141.6710544                         | 0.006343297                                            | 18.89720485                                 |
| 3.993156161                             | 82.92663225                         | 0.008380334                                            | 18.65325505                                 |
| 3.731734304                             | 98.96771658                         | 0.005342536                                            | 22.06210923                                 |
| 3.845737925                             | 94.09303333                         | 0.008194742                                            | 19.61561849                                 |
| 3.109833686                             | 133.0415123                         | 0.00483917                                             | 23.87159152                                 |
| 4.253039672                             | 83.05479742                         | 0.009562396                                            | 14.93967795                                 |
| 2.552271332                             | 91.38528628                         | 0.019741039                                            | 15.01007602                                 |
| 2.238485834                             | 91.86650248                         | 0.038882641                                            | 10.20612003                                 |
| 2.879608277                             | 151.0979874                         | 0.005256532                                            | 24.28235542                                 |
| 2.897406965                             | 113.5204299                         | 0.008175368                                            | 11.96781068                                 |
| 2.450767641                             | 103.8347936                         | 0.023346702                                            | 13.23094865                                 |
| 2.445960153                             | 119.997732                          | 0.018017256                                            | 16.9248292                                  |
| 3.345217701                             | 105.6712342                         | 0.007110365                                            | 14.5835633                                  |
| 3.54963282                              | 128.9507646                         | 0.004712739                                            | 15.98148447                                 |
| 4.378379646                             | 117.9372792                         | 0.004162715                                            | 23.52055664                                 |
| 5.447090168                             | 111.4465641                         | 0.003102549                                            | 28.47212979                                 |
| 3.367289073                             | 95.18031566                         | 0.005523674                                            | 14.66966545                                 |
| 2.407995047                             | 110.5452921                         | 0.0287555                                              | 11.7702432                                  |
| 3.076261962                             | 119.516659                          | 0.006874397                                            | 11.37031962                                 |
| 3.090506507                             | 132.0178082                         | 0.004222592                                            | 19.00677042                                 |
| 7.519516114                             | 39.42159834                         | 0.007424403                                            | 10.35921645                                 |
| 2.98242754                              | 76.9886729                          | 0.006028921                                            | 29.96722791                                 |
| 3.70646159                              | 108.7403809                         | 0.004126816                                            | 25.21571777                                 |
| 3.331117665                             | 144.7775343                         | 0.003476717                                            | 17.68331349                                 |
| 3.229005191                             | 134.3600057                         | 0.005040891                                            | 14.59599352                                 |
| 8.306029343                             | 63.05784912                         | 0.002897645                                            | 20.44886499                                 |
| 3.027579197                             | 108.9753009                         | 0.00337083                                             | 35.45212863                                 |
| 2.757495388                             | 78.80911384                         | 0.035743386                                            | 4.654995334                                 |
| 2.807143901                             | 85.48645226                         | 0.007984751                                            | 30.68758881                                 |
| 5.689429988                             | 52.54566804                         | 0.00467038                                             | 18.14188878                                 |
| 3.628788953                             | 75.357634                           | 0.004803204                                            | 26.40181628                                 |
| 3.113788318                             | 139.7941185                         | 0.004230031                                            | 22.32539735                                 |
| 3.464872608                             | 84.60901604                         | 0.008598362                                            | 15.41671135                                 |
| 2.718459744                             | 154.0902486                         | 0.012805151                                            | 16.26474354                                 |
| 3.503336155                             | 151.6796698                         | 0.005409633                                            | 22.81642748                                 |
| 3.163216965                             | 125.2110621                         | 0.005294022                                            | 15.27089372                                 |
| 2.105832128                             | 99.11153049                         | 0.053810679                                            | 9.656154454                                 |
| 3.101872004                             | 97.23661055                         | 0.01093916                                             | 18.78921573                                 |
| 2.752516588                             | 122.6264049                         | 0.018317497                                            | 11.60876029                                 |
| 2.834535462                             | 153.1948649                         | 0.00890788                                             | 22.26526724                                 |
| 2.829858702                             | 112.8135305                         | 0.007172162                                            | 22.53129635                                 |
| 3.002187547                             | 97.28508414                         | 0.007914454                                            | 16.92900596                                 |
| 2.688861191                             | 171.0148207                         | 0.009048843                                            | 15.22856225                                 |
| 2.242052814                             | 155.1386281                         | 0.016572716                                            | 19.40094851                                 |
| 3.425705528                             | 99.36784376                         | 0.005205138                                            | 13.22803123                                 |
| 2.922094764                             | 124.8865179                         | 0.006042746                                            | 23.40256515                                 |
| 5.480834787                             | 97.70056838                         | 0.003724595                                            | 21.85861878                                 |
| 3.993253433                             | 55.38372628                         | 0.006769476                                            | 9.861405811                                 |
| 3.576511381                             | 81.46190769                         | 0.0049676                                              | 19.57106324                                 |
| 3.303494338                             | 102.4215752                         | 0.008670513                                            | 16.50575064                                 |
| 2.734594592                             | 135.7913669                         | 0.006273078                                            | 20.4159455                                  |
| 4.156350001                             | 146.921046                          | 0.001972031                                            | 22.28247594                                 |
| 3.254395112                             | 102.8931532                         | 0.004005743                                            | 22.02920426                                 |
| 3.00165259                              | 135.0388866                         | 0.008356393                                            | 11.16617924                                 |
| 3.881502019                             | 101.8215436                         | 0.003631554                                            | 20.47408395                                 |
| 4.347623924                             | 47.45303707                         | 0.009494609                                            | 7.113387068                                 |
| 3.967545289                             | 75.1690174                          | 0.003288879                                            | 24.14855422                                 |
| 3.529941229                             | 111.6654655                         | 0.004700707                                            | 20.94292916                                 |
| 2.593947567                             | 115.1480512                         | 0.007715128                                            | 11.9125203                                  |
| 4.532313039                             | 94.78480534                         | 0.006385909                                            | 18.85684843                                 |
| 3.417666031                             | 152.8140551                         | 0.003149143                                            | 23.17417766                                 |
| 4.397639951                             | 118.7025006                         | 0.00457528                                             | 18.74110209                                 |
| 3.419310262                             | 44.1406691                          | 0.008471135                                            | 18.83764494                                 |
| 2.822719057                             | 80.44195221                         | 0.008092531                                            | 27.42599946                                 |
| 4.034334884                             | 84.44580964                         | 0.006129132                                            | 13.04561335                                 |
| 3.517839251                             | 114.8084943                         | 0.007136635                                            | 11.55376049                                 |
| 3.221987784                             | 106.8478499                         | 0.017320774                                            | 17.50036274                                 |
| 2.608948241                             | 119.8178789                         | 0.009345117                                            | 13.47953072                                 |
| 4.535951811                             | 43.97034154                         | 0.005424723                                            | 36.31612587                                 |
| 3.986045846                             | 61.54090224                         | 0.0038485                                              | 33.61855274                                 |
| 6.081156138                             | 47.18205036                         | 0.005122011                                            | 14.99723794                                 |
| 3.497417812                             | 119.808373                          | 0.005353759                                            | 21.98926982                                 |
| 4.669419881                             | 88.80003162                         | 0.005391814                                            | 16.93347572                                 |
| 3.344890766                             | 108.8544186                         | 0.005738056                                            | 29.26400826                                 |
| 2.467229635                             | 116.8203927                         | 0.011027326                                            | 14.21588129                                 |
| 3.499251703                             | 38.71663324                         | 0.007405582                                            | 23.96516965                                 |
| 3.119271805                             | 146.4201944                         | 0.004160271                                            | 17.85536299                                 |
| 2.640498003                             | 115.5172153                         | 0.013144545                                            | 14.00653539                                 |
| 3.424141858                             | 110.8377852                         | 0.012611884                                            | 18.03406062                                 |
| 1.777953446                             | 118.5460843                         | 0.012306819                                            | 16.35502287                                 |
| 2.989109436                             | 128.0397534                         | 0.00928961                                             | 25.15333872                                 |
| 4.75796941                              | 72.74029167                         | 0.003690452                                            | 17.50848042                                 |
| 3.20827728                              | 125.7509535                         | 0.006763356                                            | 15.19486349                                 |
| 3.049112269                             | 63.31755274                         | 0.007871296                                            | 14.47202057                                 |
| 4.54997625                              | 108.4679286                         | 0.002498878                                            | 28.26129545                                 |
| 2.855513681                             | 91.9103365                          | 0.008490024                                            | 26.44017322                                 |
| 6.811987623                             | 12.89717571                         | 0.007547476                                            | 22.73648864                                 |
| 2.899872007                             | 79.94722848                         | 0.015226847                                            | 7.86899516                                  |
| 2.641163848                             | 137.1066379                         | 0.005593957                                            | 16.53437383                                 |



| log.sigma.5.0.mm.3D_glrIm_LowGrayLevelRunEmphasis | log.sigma.5.0.mm.3D_glrIm_GrayLevelNonUniformityNormalized | log.sigma.5.0.mm.3D_glrIm_RunVariance | log.sigma.5.0.mm.3D_glrIm_GrayLevelNonUniformity |
|---------------------------------------------------|------------------------------------------------------------|---------------------------------------|--------------------------------------------------|
| 0.004210792                                       | 0.055085615                                                | 0.149047496                           | 105.2103125                                      |
| 0.021295014                                       | 0.092729503                                                | 0.250622456                           | 74.2662313                                       |
| 0.009506834                                       | 0.060349074                                                | 0.197315504                           | 81.30278415                                      |
| 0.017133103                                       | 0.05653084                                                 | 0.181833058                           | 48.77671148                                      |
| 0.010648197                                       | 0.076962734                                                | 0.229345621                           | 155.8603311                                      |
| 0.029307665                                       | 0.07442853                                                 | 0.242599858                           | 42.06880453                                      |
| 0.006807915                                       | 0.063034954                                                | 0.190203821                           | 314.8654661                                      |
| 0.002847572                                       | 0.068198864                                                | 0.226313354                           | 299.8049757                                      |
| 0.00541982                                        | 0.061079435                                                | 0.208322169                           | 241.762102                                       |
| 0.004118406                                       | 0.066633959                                                | 0.149419627                           | 63.73470877                                      |
| 0.013777954                                       | 0.075985563                                                | 0.197852335                           | 99.3805071                                       |
| 0.0069071                                         | 0.065869899                                                | 0.198919222                           | 132.4574583                                      |
| 0.009312423                                       | 0.081654488                                                | 0.337621127                           | 125.8472646                                      |
| 0.005814319                                       | 0.068694295                                                | 0.213947633                           | 101.817953                                       |
| 0.008811436                                       | 0.07112787                                                 | 0.174612082                           | 124.9838085                                      |
| 0.005223654                                       | 0.05941011                                                 | 0.185456752                           | 232.4691884                                      |
| 0.010198246                                       | 0.086688727                                                | 0.164090444                           | 91.07508639                                      |
| 0.022268644                                       | 0.083441463                                                | 0.306960402                           | 85.26697195                                      |
| 0.044657545                                       | 0.091003056                                                | 0.271714518                           | 98.52792603                                      |
| 0.005695468                                       | 0.057506359                                                | 0.182508316                           | 265.0536226                                      |
| 0.009260045                                       | 0.084221941                                                | 0.31976422                            | 211.4946132                                      |
| 0.026245229                                       | 0.075837687                                                | 0.189528261                           | 171.39399118                                     |
| 0.020230041                                       | 0.070470076                                                | 0.227423684                           | 61.95978694                                      |
| 0.007771649                                       | 0.078101844                                                | 0.233705087                           | 178.0963572                                      |
| 0.004970278                                       | 0.07345944                                                 | 0.17099111                            | 83.68279441                                      |
| 0.004429296                                       | 0.06668318                                                 | 0.171757273                           | 140.4899299                                      |
| 0.003346166                                       | 0.062683592                                                | 0.196172985                           | 178.5944473                                      |
| 0.006111736                                       | 0.07995442                                                 | 0.234192425                           | 188.4407881                                      |
| 0.032710239                                       | 0.085664177                                                | 0.243646577                           | 32.66238462                                      |
| 0.007719264                                       | 0.086458534                                                | 0.267632921                           | 148.9947781                                      |
| 0.004622624                                       | 0.066516076                                                | 0.23777317                            | 272.3586126                                      |
| 0.008099035                                       | 0.117097984                                                | 0.374902124                           | 197.485895                                       |
| 0.006460164                                       | 0.054739369                                                | 0.170926804                           | 156.895813                                       |
| 0.004371966                                       | 0.062358384                                                | 0.176382093                           | 130.6618561                                      |
| 0.003744268                                       | 0.06797601                                                 | 0.176365827                           | 264.9751195                                      |
| 0.005487588                                       | 0.074705219                                                | 0.245133003                           | 192.9030702                                      |
| 0.003180181                                       | 0.087305762                                                | 0.308190037                           | 271.2900778                                      |
| 0.003697448                                       | 0.048265046                                                | 0.30130183                            | 213.1171509                                      |
| 0.040297789                                       | 0.12934735                                                 | 0.291202634                           | 130.8690665                                      |
| 0.008628794                                       | 0.050710232                                                | 0.153904377                           | 329.6268248                                      |
| 0.005040492                                       | 0.083909132                                                | 0.257649522                           | 184.7287518                                      |
| 0.005151558                                       | 0.05785116                                                 | 0.134048825                           | 201.6301637                                      |
| 0.004504544                                       | 0.06270721                                                 | 0.169719487                           | 205.2966852                                      |
| 0.009270176                                       | 0.075888212                                                | 0.194000982                           | 165.1441378                                      |
| 0.014198574                                       | 0.075624501                                                | 0.212675578                           | 83.76399177                                      |
| 0.005854734                                       | 0.061395841                                                | 0.180646729                           | 149.05959                                        |
| 0.005799607                                       | 0.07432839                                                 | 0.223876172                           | 293.3124843                                      |
| 0.061499406                                       | 0.092582434                                                | 0.264516685                           | 68.33523159                                      |
| 0.011985216                                       | 0.069823471                                                | 0.208370149                           | 51.36356975                                      |
| 0.020472204                                       | 0.084532149                                                | 0.327714686                           | 96.33727513                                      |
| 0.009572983                                       | 0.059623178                                                | 0.165299687                           | 136.4253926                                      |
| 0.007627519                                       | 0.05975684                                                 | 0.132769155                           | 182.3865535                                      |
| 0.008702296                                       | 0.071126675                                                | 0.222348881                           | 275.761539                                       |
| 0.009629552                                       | 0.07190853                                                 | 0.158885792                           | 70.8329747                                       |
| 0.018257433                                       | 0.063167197                                                | 0.19482832                            | 73.69230728                                      |
| 0.005682906                                       | 0.081364198                                                | 0.225602905                           | 136.3772373                                      |
| 0.006479104                                       | 0.058415814                                                | 0.170633154                           | 210.6427455                                      |
| 0.004044276                                       | 0.071628378                                                | 0.250985082                           | 212.3137917                                      |
| 0.007348945                                       | 0.095831387                                                | 0.250019611                           | 133.1657153                                      |
| 0.005514915                                       | 0.067380844                                                | 0.295909114                           | 522.8763478                                      |
| 0.009634724                                       | 0.078991594                                                | 0.259995283                           | 118.4005388                                      |
| 0.006856462                                       | 0.062874607                                                | 0.195760162                           | 146.8157498                                      |
| 0.002111574                                       | 0.063207254                                                | 0.161844952                           | 325.4749238                                      |
| 0.004448878                                       | 0.066321392                                                | 0.234676288                           | 434.1547908                                      |
| 0.009031661                                       | 0.085833966                                                | 0.236497598                           | 59.26978879                                      |
| 0.004016061                                       | 0.070263927                                                | 0.29600129                            | 227.2720571                                      |
| 0.011101094                                       | 0.118913357                                                | 0.4257277                             | 119.9311907                                      |
| 0.00356945                                        | 0.063563148                                                | 0.197779604                           | 348.4396871                                      |
| 0.00500827                                        | 0.065551933                                                | 0.20362764                            | 337.9886855                                      |
| 0.008599747                                       | 0.081955341                                                | 0.278263238                           | 199.5641605                                      |
| 0.006888263                                       | 0.075222077                                                | 0.233975173                           | 84.6057914                                       |
| 0.003426627                                       | 0.061805449                                                | 0.222535418                           | 229.6940582                                      |
| 0.004910343                                       | 0.072432159                                                | 0.229991421                           | 143.3122502                                      |
| 0.00900234                                        | 0.068975301                                                | 0.175558628                           | 138.0703857                                      |
| 0.008823839                                       | 0.055604054                                                | 0.196553689                           | 152.7558805                                      |
| 0.006599584                                       | 0.084943073                                                | 0.200078553                           | 98.65508662                                      |
| 0.007830672                                       | 0.086826679                                                | 0.270537398                           | 175.9128375                                      |
| 0.019984821                                       | 0.081186321                                                | 0.317254066                           | 64.46646867                                      |
| 0.010305666                                       | 0.077419413                                                | 0.217098452                           | 114.049236                                       |
| 0.005849197                                       | 0.058065781                                                | 0.149575241                           | 122.4565734                                      |
| 0.004035682                                       | 0.054419925                                                | 0.147535787                           | 97.64357313                                      |
| 0.005600223                                       | 0.08907762                                                 | 0.284998941                           | 133.8923751                                      |
| 0.005743117                                       | 0.065606809                                                | 0.254005445                           | 186.9483661                                      |
| 0.005902993                                       | 0.076170366                                                | 0.210533028                           | 201.6175359                                      |
| 0.006204302                                       | 0.054796332                                                | 0.184826279                           | 117.9803827                                      |
| 0.012655501                                       | 0.080237866                                                | 0.333538416                           | 100.6875361                                      |
| 0.008114651                                       | 0.064212563                                                | 0.180008478                           | 134.9442164                                      |
| 0.004503243                                       | 0.068037522                                                | 0.209926148                           | 162.7971785                                      |
| 0.014465106                                       | 0.07663868                                                 | 0.223853694                           | 97.17465646                                      |
| 0.013462993                                       | 0.071960107                                                | 0.236356472                           | 125.4110488                                      |
| 0.014916359                                       | 0.083902                                                   | 0.386606366                           | 88.36080022                                      |
| 0.00990597                                        | 0.057651691                                                | 0.15326987                            | 123.1504992                                      |
| 0.004000353                                       | 0.074772349                                                | 0.211277962                           | 334.8609562                                      |
| 0.007302729                                       | 0.075376232                                                | 0.194455875                           | 218.3788213                                      |
| 0.008579787                                       | 0.075023432                                                | 0.194571831                           | 283.509902                                       |
| 0.002700337                                       | 0.062236604                                                | 0.25865901                            | 183.3586705                                      |
| 0.009289059                                       | 0.056345273                                                | 0.193575084                           | 138.5391397                                      |
| 0.008291996                                       | 0.093361852                                                | 0.334277618                           | 80.12654117                                      |
| 0.01703097                                        | 0.101404904                                                | 0.272816012                           | 70.34864371                                      |
| 0.006111751                                       | 0.068457417                                                | 0.210377021                           | 346.0433387                                      |

| log.sigma.5.0.mm.3D_glrlm_LongRunEmphasis | log.sigma.5.0.mm.3D_glrlm_ShortRunHighGrayLevelEmphasis | log.sigma.5.0.mm.3D_glrlm_RunLengthNonUniformity | log.sigma.5.0.mm.3D_glrlm_ShortRunEmphasis |
|-------------------------------------------|---------------------------------------------------------|--------------------------------------------------|--------------------------------------------|
| 1.389530107                               | 432.4610556                                             | 1580.977405                                      | 0.926535721                                |
| 1.627978395                               | 83.10975055                                             | 614.3658174                                      | 0.895221909                                |
| 1.504672714                               | 192.9734829                                             | 1078.231434                                      | 0.912004492                                |
| 1.473464143                               | 231.5866858                                             | 692.6688427                                      | 0.914217107                                |
| 1.606859192                               | 143.9848471                                             | 1533.9809                                        | 0.891436406                                |
| 1.628085474                               | 91.95993958                                             | 432.6597013                                      | 0.894039301                                |
| 1.478147585                               | 222.2927365                                             | 4040.438306                                      | 0.916718701                                |
| 1.584173956                               | 485.0447445                                             | 3387.658976                                      | 0.898431497                                |
| 1.539564585                               | 277.638271                                              | 3116.085355                                      | 0.905398748                                |
| 1.413745533                               | 401.0387204                                             | 778.7373125                                      | 0.918984876                                |
| 1.539740668                               | 128.1118584                                             | 1014.870122                                      | 0.899582796                                |
| 1.519530611                               | 227.0086936                                             | 1580.026614                                      | 0.906157825                                |
| 1.832816025                               | 210.5338659                                             | 1113.892231                                      | 0.871881111                                |
| 1.563833352                               | 329.4916221                                             | 1142.513515                                      | 0.898585116                                |
| 1.461352525                               | 202.2539061                                             | 1417.995803                                      | 0.915207511                                |
| 1.454096991                               | 314.4773371                                             | 3246.084487                                      | 0.924549305                                |
| 1.463561985                               | 207.8755892                                             | 830.6056778                                      | 0.908017563                                |
| 1.775434729                               | 91.703263                                               | 740.7901453                                      | 0.874085116                                |
| 1.733809627                               | 55.84380513                                             | 788.0299044                                      | 0.872610449                                |
| 1.462874071                               | 275.9842293                                             | 3740.80787                                       | 0.918202248                                |
| 1.786902562                               | 163.0811558                                             | 1842.901123                                      | 0.877834569                                |
| 1.511590948                               | 97.2254611                                              | 737.9846076                                      | 0.904414957                                |
| 1.596406233                               | 112.4661523                                             | 672.2663572                                      | 0.894454946                                |
| 1.59241353                                | 183.3017102                                             | 1760.083715                                      | 0.898548539                                |
| 1.435515467                               | 300.290077                                              | 944.0109043                                      | 0.924377476                                |
| 1.445273827                               | 394.9081457                                             | 1713.252984                                      | 0.918958072                                |
| 1.491117623                               | 547.0844094                                             | 2286.071887                                      | 0.914274467                                |
| 1.617473989                               | 224.3276781                                             | 1783.049717                                      | 0.890900948                                |
| 1.641966622                               | 70.38727895                                             | 289.7056272                                      | 0.889440263                                |
| 1.70438181                                | 166.9848505                                             | 1264.604195                                      | 0.878432315                                |
| 1.597228821                               | 302.732624                                              | 3167.914818                                      | 0.899409535                                |
| 1.914108368                               | 225.07442                                               | 1190.709707                                      | 0.862333317                                |
| 1.449299585                               | 307.5882157                                             | 2327.776535                                      | 0.917751059                                |
| 1.442245599                               | 382.6289124                                             | 1723.056622                                      | 0.922835138                                |
| 1.459231112                               | 356.9072303                                             | 3144.113653                                      | 0.916135857                                |
| 1.602591848                               | 269.1969476                                             | 2011.534808                                      | 0.901727154                                |
| 1.772866628                               | 566.7323272                                             | 2288.504075                                      | 0.877949726                                |
| 1.680199861                               | 471.6908263                                             | 3436.624887                                      | 0.900921939                                |
| 1.791224712                               | 40.9204703                                              | 718.2112358                                      | 0.863367445                                |
| 1.409890252                               | 262.5972499                                             | 5316.108726                                      | 0.921844449                                |
| 1.662720023                               | 348.1279528                                             | 1651.534057                                      | 0.887248117                                |
| 1.369906797                               | 309.9374462                                             | 2881.333285                                      | 0.926000112                                |
| 1.427912956                               | 323.1958603                                             | 2709.857354                                      | 0.925065054                                |
| 1.511199277                               | 187.880134                                              | 1716.70801                                       | 0.907019237                                |
| 1.554546058                               | 121.5010187                                             | 859.3489976                                      | 0.901015242                                |
| 1.465804917                               | 333.8473706                                             | 1957.117883                                      | 0.915963289                                |
| 1.571373346                               | 231.748167                                              | 3070.257225                                      | 0.901267847                                |
| 1.680500207                               | 48.32121999                                             | 553.4192276                                      | 0.885640274                                |
| 1.560616884                               | 159.3254966                                             | 567.8560167                                      | 0.897950306                                |
| 1.775654883                               | 91.85325435                                             | 864.0621651                                      | 0.88665996                                 |
| 1.431371236                               | 244.562515                                              | 1861.575082                                      | 0.919792146                                |
| 1.356111717                               | 230.224351                                              | 2549.756323                                      | 0.930352384                                |
| 1.585239163                               | 176.6574737                                             | 2967.69932                                       | 0.895995153                                |
| 1.424173907                               | 177.6472776                                             | 803.9185511                                      | 0.920009523                                |
| 1.504334566                               | 124.2109817                                             | 927.1854763                                      | 0.909726482                                |
| 1.590501901                               | 255.1643469                                             | 1282.837949                                      | 0.895068104                                |
| 1.435841814                               | 272.0053996                                             | 2947.646517                                      | 0.921351698                                |
| 1.626750731                               | 424.8340409                                             | 2276.348987                                      | 0.895927973                                |
| 1.670194213                               | 198.1861931                                             | 1025.775735                                      | 0.881101821                                |
| 1.691625329                               | 271.4307843                                             | 5924.637074                                      | 0.894284578                                |
| 1.662135137                               | 162.1789297                                             | 1127.314062                                      | 0.888793795                                |
| 1.511230652                               | 250.5591684                                             | 1843.788556                                      | 0.907709306                                |
| 1.430697707                               | 610.4442716                                             | 4179.829086                                      | 0.918914715                                |
| 1.601265687                               | 306.1855749                                             | 5025.95452                                       | 0.896642312                                |
| 1.592073717                               | 161.240825                                              | 552.6379971                                      | 0.906264037                                |
| 1.73352289                                | 363.2046689                                             | 2392.247284                                      | 0.8824675                                  |
| 1.233047188                               | 113.6263049                                             | 642.4954795                                      | 0.821493003                                |
| 1.505254137                               | 406.125884                                              | 4359.541648                                      | 0.910675154                                |
| 1.503269752                               | 309.6295935                                             | 4148.317687                                      | 0.91485906                                 |
| 1.713141937                               | 164.3516076                                             | 1809.197602                                      | 0.881920198                                |
| 1.58980914                                | 286.9539535                                             | 878.4538686                                      | 0.901677628                                |
| 1.564810484                               | 408.4923182                                             | 2899.790885                                      | 0.90289865                                 |
| 1.570433857                               | 349.5477874                                             | 1548.472593                                      | 0.903882274                                |
| 1.459164849                               | 226.9495601                                             | 1614.369352                                      | 0.915621715                                |
| 1.505015634                               | 225.6216278                                             | 2187.023894                                      | 0.910523471                                |
| 1.552614493                               | 233.5694604                                             | 895.6388909                                      | 0.896718087                                |
| 1.684541132                               | 185.6939955                                             | 1523.703708                                      | 0.887362063                                |
| 1.80308603                                | 106.4275797                                             | 574.0250338                                      | 0.871915115                                |
| 1.570221324                               | 149.4678509                                             | 1137.126118                                      | 0.898480142                                |
| 1.387747932                               | 525.0754667                                             | 1756.060222                                      | 0.928426799                                |
| 1.382795559                               | 512.9437245                                             | 1492.079455                                      | 0.928272373                                |
| 1.738578172                               | 307.4911905                                             | 1099.329213                                      | 0.876700461                                |
| 1.595372572                               | 290.4671502                                             | 2268.490124                                      | 0.909078076                                |
| 1.568653198                               | 303.6238857                                             | 2025.219279                                      | 0.895050636                                |
| 1.481118952                               | 349.4189166                                             | 1731.512416                                      | 0.914074728                                |
| 1.83980461                                | 126.3736839                                             | 891.5976352                                      | 0.86636098                                 |
| 1.479527085                               | 282.8031982                                             | 1675.856618                                      | 0.911316545                                |
| 1.527269899                               | 325.6159243                                             | 1895.201033                                      | 0.909395099                                |
| 1.574481678                               | 125.8086802                                             | 990.7829329                                      | 0.901462557                                |
| 1.602161557                               | 190.6177902                                             | 1346.540735                                      | 0.898266495                                |
| 1.950472391                               | 114.5981479                                             | 738.0022838                                      | 0.85767826                                 |
| 1.40250213                                | 221.4305445                                             | 1758.257953                                      | 0.92415556                                 |
| 1.559147868                               | 387.630871                                              | 3455.613819                                      | 0.898741815                                |
| 1.499515908                               | 206.1865811                                             | 2313.634459                                      | 0.911804751                                |
| 1.529953056                               | 189.1700062                                             | 2931.335942                                      | 0.900583693                                |
| 1.618132025                               | 589.7641929                                             | 2293.892141                                      | 0.9021991                                  |
| 1.518344271                               | 231.5163843                                             | 1928.896836                                      | 0.904608315                                |
| 1.847149718                               | 357.6854896                                             | 607.3825956                                      | 0.864555727                                |
| 1.741304519                               | 88.1838105                                              | 500.9564991                                      | 0.870509823                                |
| 1.524051917                               | 221.7762657                                             | 4028.355813                                      | 0.910860891                                |

| log.sigma.5.0.mm.3D_glrIm_LongRunHighGrayLevelEmphasis | log.sigma.5.0.mm.3D_glrIm_RunPercentage | log.sigma.5.0.mm.3D_glrIm_LongRunLowGrayLevelEmphasis | log.sigma.5.0.mm.3D_glrIm_RunEntropy |
|--------------------------------------------------------|-----------------------------------------|-------------------------------------------------------|--------------------------------------|
| 665.7998482                                            | 0.899767998                             | 0.005232832                                           | 4.946288559                          |
| 138.9881596                                            | 0.856026327                             | 0.034166265                                           | 4.260392977                          |
| 320.8616639                                            | 0.878347207                             | 0.013308006                                           | 4.775131236                          |
| 378.0499696                                            | 0.882607669                             | 0.024070057                                           | 4.872106554                          |
| 253.0499765                                            | 0.855054574                             | 0.016374761                                           | 4.580386016                          |
| 143.6733979                                            | 0.855477855                             | 0.0475644                                             | 4.521461505                          |
| 348.914194                                             | 0.883791841                             | 0.009908191                                           | 4.758599264                          |
| 832.9101255                                            | 0.860279501                             | 0.004201124                                           | 4.840992028                          |
| 465.4528376                                            | 0.870723206                             | 0.007915022                                           | 4.854035805                          |
| 619.6909262                                            | 0.892149828                             | 0.005236792                                           | 4.595819028                          |
| 222.1201859                                            | 0.867271985                             | 0.019895118                                           | 4.498148031                          |
| 373.2376022                                            | 0.872250959                             | 0.009978308                                           | 4.72403118                           |
| 424.6968308                                            | 0.82386387                              | 0.014703277                                           | 4.757116674                          |
| 554.5811148                                            | 0.862909368                             | 0.00825614                                            | 4.805354009                          |
| 326.6381174                                            | 0.885429591                             | 0.011893844                                           | 4.674501271                          |
| 496.8350284                                            | 0.893527633                             | 0.007399472                                           | 4.804512515                          |
| 348.7595807                                            | 0.879783533                             | 0.013246941                                           | 4.383941074                          |
| 161.3995232                                            | 0.828311186                             | 0.037970698                                           | 4.534591268                          |
| 101.7201632                                            | 0.834064241                             | 0.076968344                                           | 4.327867504                          |
| 427.5491481                                            | 0.886324293                             | 0.008121835                                           | 4.883630376                          |
| 315.931406                                             | 0.830306268                             | 0.015904718                                           | 4.527868314                          |
| 158.6664573                                            | 0.87274542                              | 0.040400717                                           | 4.453868564                          |
| 189.534837                                             | 0.858248197                             | 0.032033412                                           | 4.620734941                          |
| 317.1390566                                            | 0.861236233                             | 0.011624812                                           | 4.578398446                          |
| 470.7370764                                            | 0.894253429                             | 0.00648786                                            | 4.508558864                          |
| 624.1489164                                            | 0.888885281                             | 0.005853107                                           | 4.769180691                          |
| 899.2681056                                            | 0.880844179                             | 0.004645827                                           | 4.901515107                          |
| 396.0084804                                            | 0.853116471                             | 0.009367129                                           | 4.597220602                          |
| 113.7536916                                            | 0.85320943                              | 0.057052626                                           | 4.286562531                          |
| 313.7513193                                            | 0.83862632                              | 0.01259479                                            | 4.49257961                           |
| 529.2753615                                            | 0.8604779                               | 0.006941226                                           | 4.788255566                          |
| 524.318747                                             | 0.813733874                             | 0.012111724                                           | 4.282801731                          |
| 496.8407058                                            | 0.887938633                             | 0.008699672                                           | 4.976428681                          |
| 609.0644616                                            | 0.891423895                             | 0.00570327                                            | 4.819949443                          |
| 567.3554258                                            | 0.884999651                             | 0.005185134                                           | 4.652438157                          |
| 477.0955281                                            | 0.861133198                             | 0.008151898                                           | 4.56764647                           |
| 1139.162225                                            | 0.833109379                             | 0.004774871                                           | 4.707950371                          |
| 832.5937869                                            | 0.855305322                             | 0.005801962                                           | 5.211366077                          |
| 89.60163747                                            | 0.822951845                             | 0.065240781                                           | 3.915999679                          |
| 397.7724214                                            | 0.894106444                             | 0.011811142                                           | 5.032090959                          |
| 679.987583                                             | 0.847755175                             | 0.007038274                                           | 4.640024887                          |
| 452.5083499                                            | 0.901294981                             | 0.006854802                                           | 4.878786729                          |
| 496.5779671                                            | 0.89563899                              | 0.006055223                                           | 4.751530005                          |
| 315.1978102                                            | 0.874505318                             | 0.0129658                                             | 4.580595703                          |
| 191.6927372                                            | 0.866257373                             | 0.022089814                                           | 4.529716136                          |
| 540.7814686                                            | 0.884321143                             | 0.008045518                                           | 4.817299282                          |
| 397.1246592                                            | 0.864954642                             | 0.008684703                                           | 4.625945851                          |
| 81.07785229                                            | 0.84712532                              | 0.107262638                                           | 4.195077754                          |
| 259.0631741                                            | 0.864051342                             | 0.01762248                                            | 4.679120733                          |
| 168.4287626                                            | 0.842512517                             | 0.035262101                                           | 4.417412931                          |
| 382.5086746                                            | 0.890588975                             | 0.012890483                                           | 4.78781562                           |
| 336.0512888                                            | 0.905460603                             | 0.009889763                                           | 4.751430475                          |
| 306.8852634                                            | 0.859110747                             | 0.012982426                                           | 4.71504079                           |
| 274.180251                                             | 0.892001115                             | 0.01268225                                            | 4.48290923                           |
| 195.6583507                                            | 0.877096588                             | 0.027915568                                           | 4.664766408                          |
| 449.5255649                                            | 0.859289941                             | 0.008295626                                           | 4.515334965                          |
| 422.3847103                                            | 0.891337834                             | 0.008760113                                           | 4.835218284                          |
| 787.9607339                                            | 0.856964897                             | 0.005832325                                           | 4.776625607                          |
| 379.0185715                                            | 0.842746453                             | 0.010597956                                           | 4.357404159                          |
| 494.4068432                                            | 0.849718143                             | 0.008912025                                           | 4.845799958                          |
| 275.0358591                                            | 0.848070389                             | 0.015455319                                           | 4.617166634                          |
| 409.8281261                                            | 0.874474215                             | 0.009936163                                           | 4.76620072                           |
| 953.378568                                             | 0.889405637                             | 0.00284238                                            | 4.79824724                           |
| 515.0181894                                            | 0.858444586                             | 0.00697547                                            | 4.85087211                           |
| 279.4315674                                            | 0.872833496                             | 0.013278003                                           | 4.289801904                          |
| 675.3603284                                            | 0.836832251                             | 0.006389568                                           | 4.869347383                          |
| 284.4561067                                            | 0.772416234                             | 0.021133061                                           | 4.327352818                          |
| 664.761814                                             | 0.876886154                             | 0.005067278                                           | 4.883974637                          |
| 521.5365917                                            | 0.879985816                             | 0.00675922                                            | 4.762552365                          |
| 306.9315848                                            | 0.840022297                             | 0.013977646                                           | 4.502867199                          |
| 497.4563333                                            | 0.864688814                             | 0.009650142                                           | 4.650594496                          |
| 687.9638742                                            | 0.865895643                             | 0.00502693                                            | 4.897284544                          |
| 610.7680784                                            | 0.867553245                             | 0.006794165                                           | 4.684806207                          |
| 371.4144858                                            | 0.88592638                              | 0.011665415                                           | 4.667136184                          |
| 358.0635001                                            | 0.877158932                             | 0.012790059                                           | 4.960854788                          |
| 416.7484925                                            | 0.865241316                             | 0.009030883                                           | 4.436668833                          |
| 352.4691                                               | 0.845415436                             | 0.011932991                                           | 4.468466567                          |
| 184.4941066                                            | 0.827123816                             | 0.035936804                                           | 4.634472872                          |
| 254.8029349                                            | 0.862917399                             | 0.015613128                                           | 4.511009173                          |
| 818.5192037                                            | 0.901239846                             | 0.007720467                                           | 4.933033418                          |
| 784.1082729                                            | 0.901728739                             | 0.004956495                                           | 4.975635385                          |
| 613.6455192                                            | 0.834566212                             | 0.008231493                                           | 4.595994344                          |
| 509.1246384                                            | 0.870437913                             | 0.008142307                                           | 4.828784968                          |
| 540.499156                                             | 0.861198027                             | 0.008457579                                           | 4.657782966                          |
| 571.7568744                                            | 0.882454978                             | 0.008492686                                           | 5.000337748                          |
| 241.1762318                                            | 0.818487648                             | 0.022863981                                           | 4.604155182                          |
| 467.6487614                                            | 0.88056765                              | 0.011430859                                           | 4.820737319                          |
| 533.2028111                                            | 0.872580374                             | 0.006461822                                           | 4.687014607                          |
| 212.4808413                                            | 0.865962589                             | 0.021842592                                           | 4.509019092                          |
| 336.1724023                                            | 0.860018993                             | 0.018009044                                           | 4.706028678                          |
| 212.3369849                                            | 0.806807456                             | 0.033115363                                           | 4.486019572                          |
| 330.9919288                                            | 0.896757734                             | 0.013672325                                           | 4.845526917                          |
| 678.7692562                                            | 0.863993232                             | 0.005609159                                           | 4.684234287                          |
| 336.4197493                                            | 0.877785548                             | 0.010267817                                           | 4.565698252                          |
| 324.1157144                                            | 0.86821267                              | 0.012176901                                           | 4.588304188                          |
| 1020.18931                                             | 0.860315605                             | 0.0039263                                             | 4.958885806                          |
| 388.7964739                                            | 0.87247754                              | 0.013391781                                           | 4.97179897                           |
| 787.90249                                              | 0.818235251                             | 0.0119863                                             | 4.651142128                          |
| 178.0433724                                            | 0.831396421                             | 0.026973211                                           | 4.252772624                          |
| 360.0963003                                            | 0.875356372                             | 0.009195444                                           | 4.639491955                          |

| log.sigma.5.0.mm.3D_gIrlm_HighGrayLevelRunEmphasis | log.sigma.5.0.mm.3D_gIrlm_RunLengthNonUniformityNormalized | log.sigma.5.0.mm.3D_gIrlm_GrayLevelVariance |
|----------------------------------------------------|------------------------------------------------------------|---------------------------------------------|
| 469.5387188                                        | 0.826397077                                                | 37.75044402                                 |
| 91.68213659                                        | 0.764074364                                                | 13.73888889                                 |
| 211.8224349                                        | 0.797269752                                                | 23.70128503                                 |
| 254.0372491                                        | 0.801033037                                                | 32.07833388                                 |
| 160.8378228                                        | 0.755186981                                                | 17.42072343                                 |
| 100.1710594                                        | 0.761980426                                                | 15.00476299                                 |
| 241.3338802                                        | 0.806737651                                                | 25.3586034                                  |
| 537.5065655                                        | 0.76908415                                                 | 33.41478222                                 |
| 305.851387                                         | 0.783914129                                                | 26.58210425                                 |
| 437.057307                                         | 0.811416338                                                | 25.49821438                                 |
| 143.0358838                                        | 0.77235482                                                 | 14.56385071                                 |
| 249.8820789                                        | 0.784143263                                                | 21.36964801                                 |
| 239.575412                                         | 0.719851436                                                | 33.1901929                                  |
| 364.7517008                                        | 0.769206853                                                | 36.56000961                                 |
| 221.5039043                                        | 0.803995578                                                | 27.90807723                                 |
| 340.8411752                                        | 0.825308992                                                | 27.42221715                                 |
| 231.2053626                                        | 0.7882028                                                  | 20.06373264                                 |
| 102.1730874                                        | 0.72286599                                                 | 17.37075698                                 |
| 63.11449067                                        | 0.722190693                                                | 9.489022182                                 |
| 299.4764433                                        | 0.809584262                                                | 30.35672724                                 |
| 184.1864401                                        | 0.730579877                                                | 14.549975                                   |
| 107.2517525                                        | 0.781044791                                                | 14.12564096                                 |
| 124.6792123                                        | 0.761881833                                                | 16.58745698                                 |
| 203.5607947                                        | 0.769554623                                                | 20.38842057                                 |
| 326.2319386                                        | 0.82493934                                                 | 22.5915953                                  |
| 430.5646628                                        | 0.811230977                                                | 34.38917604                                 |
| 599.7835121                                        | 0.800994701                                                | 44.43402979                                 |
| 250.4358795                                        | 0.754338672                                                | 20.35567635                                 |
| 77.28131109                                        | 0.753747269                                                | 11.50244418                                 |
| 189.0600525                                        | 0.730835487                                                | 17.33351361                                 |
| 335.7266615                                        | 0.771408588                                                | 26.08186568                                 |
| 264.1089952                                        | 0.702376283                                                | 19.93775926                                 |
| 336.4917727                                        | 0.808971489                                                | 36.64950292                                 |
| 416.3242794                                        | 0.819990825                                                | 34.8010948                                  |
| 389.6462544                                        | 0.804847967                                                | 20.94871316                                 |
| 299.2155901                                        | 0.776470476                                                | 19.05862028                                 |
| 645.4403871                                        | 0.732382803                                                | 46.42565073                                 |
| 519.5615019                                        | 0.77558465                                                 | 42.99168562                                 |
| 48.11167895                                        | 0.704471211                                                | 7.446178961                                 |
| 284.3720677                                        | 0.81629364                                                 | 35.84150673                                 |
| 396.280159                                         | 0.747802618                                                | 28.04566361                                 |
| 333.960631                                         | 0.825048076                                                | 32.80619327                                 |
| 349.4255787                                        | 0.824906828                                                | 28.71628659                                 |
| 207.5313925                                        | 0.786412528                                                | 21.95077133                                 |
| 132.6620332                                        | 0.773965846                                                | 17.6014012                                  |
| 365.7405393                                        | 0.804422236                                                | 27.56277625                                 |
| 256.4024342                                        | 0.775312027                                                | 21.37744867                                 |
| 53.16307686                                        | 0.745431948                                                | 7.848468809                                 |
| 174.8738682                                        | 0.76887837                                                 | 24.45570749                                 |
| 102.2418259                                        | 0.750538294                                                | 13.16805717                                 |
| 266.1457063                                        | 0.812057972                                                | 25.3956024                                  |
| 247.6398336                                        | 0.834180174                                                | 25.83907863                                 |
| 196.6172938                                        | 0.763405105                                                | 23.73425887                                 |
| 193.2645507                                        | 0.813552692                                                | 19.56816327                                 |
| 135.6947077                                        | 0.792188289                                                | 18.29065904                                 |
| 284.8107809                                        | 0.762760859                                                | 18.50236344                                 |
| 295.272848                                         | 0.815714405                                                | 28.5071155                                  |
| 476.3547295                                        | 0.764823266                                                | 34.92565993                                 |
| 225.6754873                                        | 0.735673626                                                | 17.2397864                                  |
| 302.4246168                                        | 0.761375015                                                | 26.7469264                                  |
| 179.1367813                                        | 0.750203235                                                | 24.36960232                                 |
| 275.169168                                         | 0.787539341                                                | 23.33567946                                 |
| 665.0416819                                        | 0.810320148                                                | 30.5869454                                  |
| 337.1675471                                        | 0.76563865                                                 | 28.18901514                                 |
| 177.7265542                                        | 0.791321155                                                | 17.10868014                                 |
| 407.9524674                                        | 0.738132403                                                | 35.38320111                                 |
| 137.5049413                                        | 0.632838692                                                | 14.71956212                                 |
| 445.1090883                                        | 0.793568379                                                | 36.45728655                                 |
| 340.5477555                                        | 0.802700411                                                | 29.14890084                                 |
| 185.1850549                                        | 0.738836358                                                | 16.01359375                                 |
| 317.8944466                                        | 0.77740683                                                 | 28.76348385                                 |
| 450.5220768                                        | 0.778250148                                                | 34.46237344                                 |
| 387.5956847                                        | 0.780316153                                                | 30.34435374                                 |
| 249.3040698                                        | 0.804023879                                                | 26.70092773                                 |
| 246.0301164                                        | 0.793800973                                                | 30.9989348                                  |
| 262.497167                                         | 0.767056265                                                | 19.26530438                                 |
| 209.5679854                                        | 0.748650986                                                | 17.84048768                                 |
| 117.8615036                                        | 0.719721337                                                | 20.60865595                                 |
| 165.7258249                                        | 0.769336032                                                | 16.11111111                                 |
| 570.2318736                                        | 0.830988982                                                | 44.51053711                                 |
| 555.7349324                                        | 0.830220008                                                | 40.87856635                                 |
| 351.3325915                                        | 0.728290394                                                | 34.10099115                                 |
| 319.8665709                                        | 0.792562923                                                | 32.64488503                                 |
| 340.5802195                                        | 0.7625078                                                  | 24.0409416                                  |
| 382.868467                                         | 0.801371953                                                | 34.56789987                                 |
| 142.7453245                                        | 0.708380058                                                | 17.39415978                                 |
| 311.7821554                                        | 0.795239379                                                | 30.56155461                                 |
| 356.7320509                                        | 0.790955116                                                | 22.70228897                                 |
| 138.8271671                                        | 0.777023293                                                | 15.31558666                                 |
| 212.0278499                                        | 0.76985227                                                 | 28.18473046                                 |
| 128.5202998                                        | 0.695480378                                                | 11.439375                                   |
| 239.3984165                                        | 0.821360262                                                | 27.93460723                                 |
| 432.1287421                                        | 0.769485797                                                | 28.0333653                                  |
| 226.1952725                                        | 0.796497751                                                | 20.58650364                                 |
| 210.5685866                                        | 0.773274669                                                | 20.34175007                                 |
| 649.9249087                                        | 0.777091175                                                | 42.74620542                                 |
| 256.0135751                                        | 0.781783316                                                | 31.18585277                                 |
| 417.1285667                                        | 0.705369494                                                | 35.76572878                                 |
| 101.6826821                                        | 0.717544236                                                | 11.93911232                                 |
| 242.5797278                                        | 0.794588592                                                | 21.64005628                                 |

| log.sigma.5.0.mm.3D_glszm_SmallAreaHighGrayLevelEmphasis | log.sigma.5.0.mm.3D_glszm_GrayLevelNonUniformityNormalized | log.sigma.5.0.mm.3D_glszm_SizeZoneNonUniformityNormalized |
|----------------------------------------------------------|------------------------------------------------------------|-----------------------------------------------------------|
| 216.088553                                               | 0.046667823                                                | 0.288024783                                               |
| 54.56758286                                              | 0.076                                                      | 0.239466667                                               |
| 101.1867304                                              | 0.058352704                                                | 0.318999167                                               |
| 120.2201184                                              | 0.050076033                                                | 0.296476033                                               |
| 75.34462711                                              | 0.067185444                                                | 0.243518212                                               |
| 63.79754938                                              | 0.074302698                                                | 0.332037799                                               |
| 133.1796506                                              | 0.057799401                                                | 0.280982449                                               |
| 292.8207175                                              | 0.049721228                                                | 0.291612329                                               |
| 147.1050413                                              | 0.054593045                                                | 0.266095306                                               |
| 205.0466693                                              | 0.060484885                                                | 0.297319048                                               |
| 61.18242916                                              | 0.073487899                                                | 0.223888195                                               |
| 118.677755                                               | 0.062014224                                                | 0.258191573                                               |
| 114.6251983                                              | 0.049185746                                                | 0.222733009                                               |
| 172.561971                                               | 0.047218706                                                | 0.266322373                                               |
| 106.0999425                                              | 0.054891895                                                | 0.263822407                                               |
| 160.6131798                                              | 0.054005654                                                | 0.269308104                                               |
| 81.24875878                                              | 0.064722222                                                | 0.201666667                                               |
| 55.12228049                                              | 0.068356935                                                | 0.293263224                                               |
| 25.25520755                                              | 0.089463558                                                | 0.186962426                                               |
| 153.5428291                                              | 0.050855756                                                | 0.26239184                                                |
| 100.23429                                                | 0.0742625                                                  | 0.2764625                                                 |
| 38.1411108                                               | 0.076324197                                                | 0.208515665                                               |
| 62.26250214                                              | 0.069598049                                                | 0.239600388                                               |
| 95.22044638                                              | 0.062589113                                                | 0.261452039                                               |
| 136.7524211                                              | 0.060168384                                                | 0.283985339                                               |
| 219.9861506                                              | 0.049209854                                                | 0.290688927                                               |
| 308.3475408                                              | 0.045248161                                                | 0.312788071                                               |
| 131.5541519                                              | 0.063110457                                                | 0.283341712                                               |
| 32.08951532                                              | 0.086272955                                                | 0.195402299                                               |
| 78.67253597                                              | 0.069737396                                                | 0.1909741                                                 |
| 169.2668086                                              | 0.054630763                                                | 0.292503348                                               |
| 100.5458052                                              | 0.073367872                                                | 0.259840837                                               |
| 163.1943438                                              | 0.045613033                                                | 0.275380109                                               |
| 203.9512491                                              | 0.048778813                                                | 0.295867682                                               |
| 200.8420813                                              | 0.063022932                                                | 0.29889736                                                |
| 137.8078108                                              | 0.066064239                                                | 0.269582657                                               |
| 331.8586357                                              | 0.044741077                                                | 0.314117256                                               |
| 261.7254012                                              | 0.043465025                                                | 0.272858502                                               |
| 14.87346538                                              | 0.109478625                                                | 0.18375676                                                |
| 152.3004615                                              | 0.04591921                                                 | 0.257285279                                               |
| 162.9002292                                              | 0.058753323                                                | 0.289361331                                               |
| 192.2452509                                              | 0.052304585                                                | 0.274913675                                               |
| 168.7120837                                              | 0.05210213                                                 | 0.286317851                                               |
| 98.82346078                                              | 0.061325073                                                | 0.241210938                                               |
| 76.18228438                                              | 0.068386137                                                | 0.26002852                                                |
| 190.6107862                                              | 0.054843952                                                | 0.338655349                                               |
| 119.1360006                                              | 0.060084481                                                | 0.234124518                                               |
| 22.04941219                                              | 0.106086957                                                | 0.210132325                                               |
| 101.7576911                                              | 0.058924561                                                | 0.242964725                                               |
| 46.51909222                                              | 0.086495435                                                | 0.281089675                                               |
| 124.413672                                               | 0.055519513                                                | 0.258425521                                               |
| 129.2914092                                              | 0.054608714                                                | 0.279830331                                               |
| 108.2542971                                              | 0.05668564                                                 | 0.291902448                                               |
| 94.84616581                                              | 0.062984694                                                | 0.325102041                                               |
| 63.98451849                                              | 0.066544519                                                | 0.271862341                                               |
| 131.3535868                                              | 0.06746012                                                 | 0.205345859                                               |
| 145.7411972                                              | 0.05179588                                                 | 0.272509528                                               |
| 185.3373783                                              | 0.050010462                                                | 0.244774987                                               |
| 95.15780754                                              | 0.071014596                                                | 0.291705233                                               |
| 154.3308364                                              | 0.055640993                                                | 0.265335555                                               |
| 117.672099                                               | 0.057328794                                                | 0.287812269                                               |
| 130.2579784                                              | 0.05967931                                                 | 0.242766015                                               |
| 354.9576186                                              | 0.053080702                                                | 0.314704586                                               |
| 198.5469168                                              | 0.053738879                                                | 0.241017729                                               |
| 88.04456021                                              | 0.072247325                                                | 0.280570749                                               |
| 210.0978927                                              | 0.049140186                                                | 0.250148294                                               |
| 43.7750157                                               | 0.078675685                                                | 0.158597366                                               |
| 234.9740952                                              | 0.04693781                                                 | 0.26740873                                                |
| 151.3698001                                              | 0.051442237                                                | 0.312781116                                               |
| 78.56683914                                              | 0.072875                                                   | 0.2084875                                                 |
| 142.6660287                                              | 0.057919174                                                | 0.271416348                                               |
| 230.2835149                                              | 0.0486125                                                  | 0.271878125                                               |
| 162.1163607                                              | 0.05314059                                                 | 0.240090703                                               |
| 113.9484452                                              | 0.053817749                                                | 0.258880615                                               |
| 141.2953613                                              | 0.050349287                                                | 0.252857048                                               |
| 114.9414495                                              | 0.068422926                                                | 0.246934852                                               |
| 96.47347787                                              | 0.068285159                                                | 0.297852025                                               |
| 69.89135181                                              | 0.065467495                                                | 0.215850986                                               |
| 82.30367752                                              | 0.070577739                                                | 0.22610436                                                |
| 268.2924503                                              | 0.046191406                                                | 0.296391602                                               |
| 265.8849665                                              | 0.046159641                                                | 0.295870513                                               |
| 159.4343965                                              | 0.051058434                                                | 0.263211014                                               |
| 147.9437681                                              | 0.048252381                                                | 0.265029193                                               |
| 139.5457035                                              | 0.061647804                                                | 0.219846084                                               |
| 194.832086                                               | 0.048740175                                                | 0.26284811                                                |
| 82.39405769                                              | 0.072910927                                                | 0.274490358                                               |
| 136.6045789                                              | 0.050916541                                                | 0.257355192                                               |
| 189.4081613                                              | 0.060337153                                                | 0.309212929                                               |
| 65.05371813                                              | 0.075393854                                                | 0.256055882                                               |
| 92.46487763                                              | 0.053828431                                                | 0.228837899                                               |
| 74.7292279                                               | 0.0861                                                     | 0.2761                                                    |
| 118.0852927                                              | 0.053278835                                                | 0.261272452                                               |
| 195.2508773                                              | 0.05466223                                                 | 0.230403987                                               |
| 114.2318685                                              | 0.062031625                                                | 0.287505827                                               |
| 98.98684418                                              | 0.062447195                                                | 0.229065879                                               |
| 376.8139026                                              | 0.046484169                                                | 0.333990807                                               |
| 116.3062951                                              | 0.049235264                                                | 0.217024168                                               |
| 202.9031213                                              | 0.052650646                                                | 0.32007004                                                |
| 26.53709417                                              | 0.082839289                                                | 0.130267585                                               |
| 120.4185637                                              | 0.059363849                                                | 0.284685569                                               |

| log.sigma.5.0.mm.3D_glszm_SizeZoneNonUniformity | log.sigma.5.0.mm.3D_glszm_GrayLevelNonUniformity | log.sigma.5.0.mm.3D_glszm_LargeAreaEmphasis | log.sigma.5.0.mm.3D_glszm_ZoneVariance |
|-------------------------------------------------|--------------------------------------------------|---------------------------------------------|----------------------------------------|
| 180.3035144                                     | 29.21405751                                      | 58.99361022                                 | 47.50302647                            |
| 35.92                                           | 11.4                                             | 339.3933333                                 | 300.5388889                            |
| 96.33774834                                     | 17.62251656                                      | 146.9271523                                 | 121.1261348                            |
| 81.53090909                                     | 13.77090909                                      | 52.67272727                                 | 40.0508562                             |
| 91.80636605                                     | 25.32891247                                      | 348.4615385                                 | 309.0084782                            |
| 53.79012346                                     | 12.03703704                                      | 109.8888889                                 | 93.29080933                            |
| 339.1458161                                     | 69.76387738                                      | 166.1350456                                 | 144.2152715                            |
| 269.1581798                                     | 45.89274106                                      | 687.3369447                                 | 656.7103738                            |
| 241.6145374                                     | 49.57048458                                      | 191.1982379                                 | 166.1321149                            |
| 83.84397163                                     | 17.05673759                                      | 61.78014184                                 | 47.32935969                            |
| 65.82312925                                     | 21.60544218                                      | 115.3877551                                 | 89.07853209                            |
| 115.4116331                                     | 27.72035794                                      | 212.901566                                  | 186.311047                             |
| 57.46511628                                     | 12.68992248                                      | 602.3682171                                 | 550.0022384                            |
| 87.62006079                                     | 15.53495441                                      | 278.8358663                                 | 251.5995233                            |
| 122.6774194                                     | 25.52473118                                      | 149.5096774                                 | 131.305233                             |
| 229.7198124                                     | 46.06682298                                      | 205.1864009                                 | 178.8681778                            |
| 48.4                                            | 15.53333333                                      | 97.55                                       | 72.799375                              |
| 57.47959184                                     | 13.39795918                                      | 460.9540816                                 | 421.3797116                            |
| 35.14893617                                     | 16.81914894                                      | 365.4574468                                 | 317.7887053                            |
| 287.0566728                                     | 55.63619744                                      | 141.2422303                                 | 118.6580158                            |
| 110.585                                         | 29.705                                           | 851.595                                     | 794.4414                               |
| 40.24352332                                     | 14.73056995                                      | 153.3626943                                 | 122.1070633                            |
| 41.45086705                                     | 12.04046243                                      | 221.6878613                                 | 186.6524107                            |
| 138.3081285                                     | 33.10964083                                      | 205.4272212                                 | 180.3893997                            |
| 94.28313253                                     | 19.97590361                                      | 65.82831325                                 | 51.12617034                            |
| 177.0295567                                     | 29.96880131                                      | 184.2545156                                 | 169.1225433                            |
| 226.4585635                                     | 32.75966851                                      | 189.7223757                                 | 169.7819568                            |
| 133.7372881                                     | 29.78813559                                      | 518.6525424                                 | 484.410209                             |
| 17                                              | 7.505747126                                      | 99.25287356                                 | 72.85453825                            |
| 49.27131783                                     | 17.99224806                                      | 393.1860465                                 | 329.8046992                            |
| 240.7302552                                     | 44.96111786                                      | 367.8979344                                 | 334.4746438                            |
| 61.58227848                                     | 17.38818565                                      | 1345.734177                                 | 1269.522014                            |
| 207.3612218                                     | 34.34661355                                      | 134.2138114                                 | 115.8253185                            |
| 163.6148282                                     | 26.97468354                                      | 132.9367089                                 | 114.8780513                            |
| 289.3326446                                     | 61.00619835                                      | 128.6012397                                 | 107.9024998                            |
| 139.1046512                                     | 34.08914729                                      | 382.6763566                                 | 348.8968324                            |
| 183.1303602                                     | 26.08404803                                      | 1254.204117                                 | 1213.467756                            |
| 271.7670683                                     | 43.29116466                                      | 391.0953815                                 | 364.2450878                            |
| 18.19191919                                     | 10.83838384                                      | 920.040404                                  | 765.6786042                            |
| 457.7105115                                     | 81.69027544                                      | 99.77740304                                 | 83.07738556                            |
| 131.3700441                                     | 26.67400881                                      | 337.7444934                                 | 305.0986241                            |
| 289.7590133                                     | 55.12903226                                      | 49.95920304                                 | 36.49851924                            |
| 260.2629263                                     | 47.36083608                                      | 129.2024202                                 | 113.0524555                            |
| 123.5                                           | 31.3984375                                       | 197.0859375                                 | 173.4724121                            |
| 66.04724409                                     | 17.37007874                                      | 193.1259843                                 | 167.8100316                            |
| 235.3654676                                     | 38.11654676                                      | 117.9266187                                 | 102.3269603                            |
| 193.1527273                                     | 49.56969697                                      | 467.5345455                                 | 436.9569969                            |
| 24.16521739                                     | 12.2                                             | 383.1565217                                 | 325.7923629                            |
| 42.27586207                                     | 10.25287356                                      | 138.1666667                                 | 114.2466971                            |
| 69.4291498                                      | 21.36437247                                      | 267.0445344                                 | 237.0833156                            |
| 154.5384615                                     | 33.2006689                                       | 80.19565217                                 | 61.74015112                            |
| 270.0362694                                     | 52.69740933                                      | 45.5388601                                  | 33.33596499                            |
| 214.5482993                                     | 41.66394558                                      | 468.4761905                                 | 430.7916257                            |
| 91.02857143                                     | 17.63571429                                      | 74.00714286                                 | 58.46102041                            |
| 81.83056478                                     | 20.02990033                                      | 111.3421927                                 | 91.81812563                            |
| 65.09463722                                     | 21.38485804                                      | 328.5930599                                 | 290.7530974                            |
| 280.957323                                      | 53.40155189                                      | 77.97381183                                 | 62.58093759                            |
| 129.9755179                                     | 26.55555556                                      | 423.5329567                                 | 381.1236731                            |
| 77.30188679                                     | 18.81886792                                      | 444.3698113                                 | 405.6954931                            |
| 405.9633987                                     | 85.13071895                                      | 452.7614379                                 | 417.1603268                            |
| 95.26586103                                     | 18.97583082                                      | 295.8610272                                 | 267.395095                             |
| 131.336414                                      | 32.28650647                                      | 176.7245841                                 | 152.3673488                            |
| 448.4540351                                     | 75.64                                            | 163.3396491                                 | 146.8360992                            |
| 317.1793313                                     | 70.72036474                                      | 363.3791793                                 | 329.8255069                            |
| 40.68275862                                     | 10.47586207                                      | 154.1655172                                 | 124.4818074                            |
| 146.3367521                                     | 28.74700855                                      | 721.0632479                                 | 677.4806808                            |
| 16.81132075                                     | 8.339622642                                      | 1046.150943                                 | 894.8145247                            |
| 350.5728452                                     | 61.53546911                                      | 215.9344012                                 | 193.206745                             |
| 432.5762834                                     | 71.14461316                                      | 160.890094                                  | 142.9548996                            |
| 83.395                                          | 29.15                                            | 546.8                                       | 494.309975                             |
| 72.46816479                                     | 15.46441948                                      | 204.8277154                                 | 181.1578504                            |
| 217.5025                                        | 38.89                                            | 371.8725                                    | 343.1160938                            |
| 100.8380952                                     | 22.31904762                                      | 201.9547619                                 | 172.5112188                            |
| 132.546875                                      | 27.5546875                                       | 109.0917969                                 | 89.62508774                            |
| 175.9885057                                     | 35.04310345                                      | 190.3002874                                 | 170.0632163                            |
| 65.43773585                                     | 18.13207547                                      | 121.0716981                                 | 95.42607334                            |
| 115.2687339                                     | 26.42635659                                      | 405.6020672                                 | 367.2709306                            |
| 31.94594595                                     | 9.689189189                                      | 337.0405405                                 | 295.1411614                            |
| 65.11805556                                     | 20.32638889                                      | 213.2534722                                 | 178.1231554                            |
| 189.690625                                      | 29.5625                                          | 101.3390625                                 | 87.98232178                            |
| 181.6644951                                     | 28.34201954                                      | 56.21009772                                 | 45.71629672                            |
| 73.17266187                                     | 14.1942446                                       | 468.0179856                                 | 426.1412582                            |
| 159.8126036                                     | 29.09618574                                      | 392.1608624                                 | 362.771158                             |
| 103.3276596                                     | 28.97446809                                      | 257.0489362                                 | 214.2995971                            |
| 157.9717138                                     | 29.29284526                                      | 82.078203                                   | 65.60892135                            |
| 45.29090909                                     | 12.03030303                                      | 812.4727273                                 | 726.2643159                            |
| 135.626186                                      | 26.83301708                                      | 185.8690702                                 | 165.3878637                            |
| 183.0540541                                     | 35.71959459                                      | 240.7432432                                 | 219.2900726                            |
| 69.39114391                                     | 20.43173432                                      | 175.2398524                                 | 146.0559361                            |
| 81.46629213                                     | 19.16292135                                      | 293.9466292                                 | 261.5909844                            |
| 55.22                                           | 17.22                                            | 546.46                                      | 503.9496                               |
| 169.0432767                                     | 34.47140649                                      | 47.94435858                                 | 34.39012539                            |
| 223.9526749                                     | 53.13168724                                      | 352.3734568                                 | 323.9399852                            |
| 192.0538922                                     | 41.43712575                                      | 205.6856287                                 | 181.2808455                            |
| 166.9890261                                     | 45.52400549                                      | 239.7201646                                 | 204.0813938                            |
| 239.4714086                                     | 33.32914923                                      | 449.4030683                                 | 426.6247479                            |
| 109.8142292                                     | 24.91304348                                      | 140.2905138                                 | 109.2968684                            |
| 58.25274725                                     | 9.582417582                                      | 385.8846154                                 | 352.7905144                            |
| 10.29113924                                     | 6.544303797                                      | 425.2911392                                 | 313.841692                             |
| 320.5559503                                     | 66.84369449                                      | 245.0373002                                 | 218.742082                             |

| log.sigma.5.0.mm.3D_glszm_ZonePercentage | log.sigma.5.0.mm.3D_glszm_LargeAreaLowGrayLevelEmphasis | log.sigma.5.0.mm.3D_glszm_LargeAreaHighGrayLevelEmphasis | log.sigma.5.0.mm.3D_glszm_HighGrayLevelZoneEmphasis |
|------------------------------------------|---------------------------------------------------------|----------------------------------------------------------|-----------------------------------------------------|
| 0.295004713                              | 0.138660244                                             | 28967.6853                                               | 424.0047923                                         |
| 0.160427807                              | 6.829669405                                             | 20112.14667                                              | 110.4333333                                         |
| 0.196870926                              | 1.129185439                                             | 28135.84437                                              | 192.013245                                          |
| 0.2814739                                | 0.475357711                                             | 13450.21091                                              | 230.7345455                                         |
| 0.159206081                              | 3.18346284                                              | 43765.95225                                              | 163.33687                                           |
| 0.245454545                              | 3.318501274                                             | 5895.493827                                              | 112.6728395                                         |
| 0.213590515                              | 1.039923344                                             | 32797.91881                                              | 252.6760563                                         |
| 0.180696946                              | 1.601796334                                             | 302914.3954                                              | 548.9458288                                         |
| 0.199736032                              | 0.821780851                                             | 52401.02533                                              | 289.4647577                                         |
| 0.263059701                              | 0.17374773                                              | 25302.67376                                              | 405.6099291                                         |
| 0.194960212                              | 1.12054077                                              | 16419.81633                                              | 136.9897959                                         |
| 0.193926247                              | 1.208502616                                             | 43236.7047                                               | 242.6935123                                         |
| 0.138189609                              | 3.205381894                                             | 122076.0233                                              | 252.6434109                                         |
| 0.191613279                              | 1.003876888                                             | 83921.81459                                              | 352.7294833                                         |
| 0.234375                                 | 0.753665327                                             | 33638.2129                                               | 214.3333333                                         |
| 0.194926874                              | 0.813022222                                             | 63744.7456                                               | 325.9460727                                         |
| 0.201005025                              | 0.471604925                                             | 25627.10417                                              | 193.7541667                                         |
| 0.158961882                              | 9.914093447                                             | 26373.22959                                              | 112.0357143                                         |
| 0.144838213                              | 15.86045717                                             | 12314.76064                                              | 67.67021277                                         |
| 0.210425082                              | 0.671622582                                             | 35844.36837                                              | 305.297989                                          |
| 0.132275132                              | 6.350849782                                             | 124868.45                                                | 189.98                                              |
| 0.178869323                              | 3.140653798                                             | 11960.64249                                              | 104.4248705                                         |
| 0.168945313                              | 3.7950323                                               | 18802.04046                                              | 138.6069364                                         |
| 0.199848886                              | 1.33075472                                              | 34858.07372                                              | 198.805293                                          |
| 0.260801257                              | 0.22506771                                              | 21441.62048                                              | 293.4518072                                         |
| 0.257070494                              | 0.464572633                                             | 78388.53366                                              | 418.2660099                                         |
| 0.223940612                              | 0.363082121                                             | 112943.489                                               | 562.1850829                                         |
| 0.170890659                              | 2.710828475                                             | 105244.0233                                              | 251.434322                                          |
| 0.194630872                              | 3.85008241                                              | 4455.505747                                              | 85.62068966                                         |
| 0.125608569                              | 2.675320549                                             | 64367.62403                                              | 192.4341085                                         |
| 0.172971837                              | 1.38468716                                              | 107287.7983                                              | 318.7703524                                         |
| 0.114548091                              | 4.916167998                                             | 380855.7722                                              | 202.1308017                                         |
| 0.233199133                              | 0.444730864                                             | 51019.8672                                               | 305.687915                                          |
| 0.235319149                              | 0.344105638                                             | 57375.82278                                              | 381.8517179                                         |
| 0.219800182                              | 0.394509214                                             | 46593.84607                                              | 373.4803719                                         |
| 0.172057352                              | 1.625034652                                             | 101480.4438                                              | 277.7945736                                         |
| 0.156678312                              | 2.04863707                                              | 783543.8113                                              | 601.1372213                                         |
| 0.192985855                              | 1.005730865                                             | 173083.9508                                              | 500.6767068                                         |
| 0.080487805                              | 25.02325798                                             | 42404.09091                                              | 40.36363636                                         |
| 0.244704264                              | 0.541013396                                             | 25236.53064                                              | 295.7959528                                         |
| 0.175019275                              | 0.835962701                                             | 145237.0661                                              | 318.845815                                          |
| 0.27256271                               | 0.207782575                                             | 15363.73624                                              | 353.0939279                                         |
| 0.248836573                              | 0.473874143                                             | 38679.79868                                              | 335.4092409                                         |
| 0.205787781                              | 1.135140219                                             | 38781.85938                                              | 198.4980469                                         |
| 0.198748044                              | 3.005685876                                             | 15098.26772                                              | 156.1732283                                         |
| 0.253187614                              | 0.420645013                                             | 40351.86475                                              | 330.6733813                                         |
| 0.180841736                              | 2.27854079                                              | 101657.7915                                              | 258.6121212                                         |
| 0.132032147                              | 23.31246149                                             | 10872.67826                                              | 56                                                  |
| 0.204465335                              | 1.417647725                                             | 17082.48851                                              | 207.637931                                          |
| 0.182692308                              | 5.503239356                                             | 18514.33603                                              | 102.0769231                                         |
| 0.232775399                              | 0.449466059                                             | 21040.53344                                              | 253.9715719                                         |
| 0.286265203                              | 0.267433961                                             | 10514.93575                                              | 249.3803109                                         |
| 0.162898936                              | 3.376551909                                             | 73853.04354                                              | 198.8013605                                         |
| 0.253623188                              | 0.552323244                                             | 12290.15357                                              | 179.7714286                                         |
| 0.226315789                              | 2.144003096                                             | 10196.11296                                              | 132.730897                                          |
| 0.162564103                              | 1.340812334                                             | 84896.98423                                              | 290.8044164                                         |
| 0.254882571                              | 0.351347267                                             | 21679.80116                                              | 284.9107662                                         |
| 0.153556969                              | 0.962176232                                             | 201118.162                                               | 404.1299435                                         |
| 0.160800971                              | 2.173216229                                             | 95471.49057                                              | 187.3207547                                         |
| 0.167597765                              | 1.886881097                                             | 123976.5281                                              | 295.6640523                                         |
| 0.187429219                              | 2.677817942                                             | 35620.29003                                              | 214.326284                                          |
| 0.202621723                              | 0.944479351                                             | 39331.56932                                              | 274.9186691                                         |
| 0.246156504                              | 0.287484138                                             | 96981.48491                                              | 641.7347368                                         |
| 0.172635445                              | 1.566557881                                             | 90790.53799                                              | 393.6785714                                         |
| 0.183544304                              | 1.130905025                                             | 24124.31034                                              | 177.262069                                          |
| 0.151475919                              | 2.286321737                                             | 236767.4855                                              | 421.0188034                                         |
| 0.081288344                              | 9.463306186                                             | 122648.5                                                 | 132.2169811                                         |
| 0.20976                                  | 0.553442198                                             | 90340.6087                                               | 450.9260107                                         |
| 0.23612771                               | 0.513770486                                             | 55603.90094                                              | 287.746927                                          |
| 0.138026225                              | 4.095839056                                             | 81896.92                                                 | 183.3925                                            |
| 0.205542725                              | 0.809971627                                             | 57038.7603                                               | 302.9325843                                         |
| 0.186480186                              | 1.037056592                                             | 140345.2413                                              | 456.81625                                           |
| 0.184291356                              | 0.58947188                                              | 76029.27619                                              | 352.2904762                                         |
| 0.22664896                               | 0.479816595                                             | 30135.5625                                               | 228.4296875                                         |
| 0.222293197                              | 1.256591014                                             | 37255.81466                                              | 274.7356322                                         |
| 0.197466468                              | 0.491945638                                             | 33419.87925                                              | 237.7471698                                         |
| 0.161519199                              | 2.13402206                                              | 85832.15762                                              | 184.2971576                                         |
| 0.154488518                              | 6.440512023                                             | 21296.42568                                              | 157.8783784                                         |
| 0.168717047                              | 1.938945911                                             | 27994.18056                                              | 172.3611111                                         |
| 0.273621206                              | 0.211564095                                             | 69915.87344                                              | 498.6                                               |
| 0.308697838                              | 0.113906826                                             | 32715.77687                                              | 507.4104235                                         |
| 0.154530295                              | 1.377366797                                             | 166403.6871                                              | 327.6438849                                         |
| 0.18446008                               | 1.429043125                                             | 114854.3234                                              | 298.9353234                                         |
| 0.152945005                              | 0.823277215                                             | 94572.74894                                              | 310.4425532                                         |
| 0.246412464                              | 0.283409004                                             | 31721.59567                                              | 373.4708819                                         |
| 0.10770235                               | 9.834128142                                             | 80659.51515                                              | 158.7878788                                         |
| 0.220964361                              | 0.694595608                                             | 60395.11195                                              | 281.0056926                                         |
| 0.215900802                              | 0.889108513                                             | 69707.81419                                              | 352.5050676                                         |
| 0.18510929                               | 2.005136412                                             | 20419.80074                                              | 137.9446494                                         |
| 0.175802469                              | 1.829917365                                             | 53656.6573                                               | 202.0393258                                         |
| 0.153374233                              | 11.49452813                                             | 35570.97                                                 | 144.265                                             |
| 0.271620487                              | 0.337375084                                             | 11033.2102                                               | 236.5517774                                         |
| 0.187536176                              | 0.857604638                                             | 151622.7829                                              | 413.0730453                                         |
| 0.202424242                              | 1.112505508                                             | 42207.46257                                              | 217.0898204                                         |
| 0.167509191                              | 1.278800828                                             | 54314.46365                                              | 203.6488834                                         |
| 0.209526593                              | 0.877484528                                             | 237896.7545                                              | 656.292887                                          |
| 0.179623713                              | 0.866752725                                             | 34916.18775                                              | 251.0573123                                         |
| 0.17382999                               | 0.985028339                                             | 171051.1758                                              | 351.1208791                                         |
| 0.094724221                              | 5.252299189                                             | 41186.41772                                              | 94.7721519                                          |
| 0.195012123                              | 1.460071717                                             | 47083.46625                                              | 239.9236234                                         |

| log.sigma.5.0.mm.3D_glszm_SmallAreaEmphasis | log.sigma.5.0.mm.3D_glszm_LowGrayLevelZoneEmphasis | log.sigma.5.0.mm.3D_glszm_ZoneEntropy | log.sigma.5.0.mm.3D_glszm_SmallAreaLowGrayLevelEmphasis |
|---------------------------------------------|----------------------------------------------------|---------------------------------------|---------------------------------------------------------|
| 0.547612144                                 | 0.006518132                                        | 6.672521531                           | 0.004527595                                             |
| 0.500339575                                 | 0.026868413                                        | 5.927501254                           | 0.015998937                                             |
| 0.586097676                                 | 0.016826212                                        | 6.179056663                           | 0.013282625                                             |
| 0.559485917                                 | 0.016648607                                        | 6.272356748                           | 0.00737871                                              |
| 0.50672737                                  | 0.014778333                                        | 6.399727568                           | 0.00902293                                              |
| 0.596998214                                 | 0.032223026                                        | 5.565604067                           | 0.024320928                                             |
| 0.546572226                                 | 0.0081851                                          | 6.79815949                            | 0.00499724                                              |
| 0.558437982                                 | 0.004064402                                        | 6.856413292                           | 0.001943054                                             |
| 0.530486066                                 | 0.007839232                                        | 6.826653559                           | 0.004773612                                             |
| 0.562680803                                 | 0.007468114                                        | 6.256565931                           | 0.006206178                                             |
| 0.480733807                                 | 0.016754306                                        | 6.212677856                           | 0.006974215                                             |
| 0.521809576                                 | 0.009772062                                        | 6.486557426                           | 0.006128665                                             |
| 0.470581664                                 | 0.01481116                                         | 6.557963892                           | 0.005829864                                             |
| 0.528465339                                 | 0.008580397                                        | 6.622511742                           | 0.003690064                                             |
| 0.521302976                                 | 0.012468432                                        | 6.541559324                           | 0.007748736                                             |
| 0.534222795                                 | 0.006658936                                        | 6.760947151                           | 0.004033851                                             |
| 0.452326383                                 | 0.01588996                                         | 6.457471541                           | 0.006296771                                             |
| 0.558834869                                 | 0.035546675                                        | 5.833521678                           | 0.027515628                                             |
| 0.426794634                                 | 0.05501485                                         | 5.94105612                            | 0.024615106                                             |
| 0.527545563                                 | 0.007134007                                        | 6.968162648                           | 0.004346012                                             |
| 0.542620905                                 | 0.011148949                                        | 6.199082549                           | 0.00458431                                              |
| 0.462827349                                 | 0.035560861                                        | 6.111630899                           | 0.020330593                                             |
| 0.495365959                                 | 0.02371194                                         | 5.893180972                           | 0.013081906                                             |
| 0.523051068                                 | 0.011678142                                        | 6.54208326                            | 0.007739976                                             |
| 0.541004579                                 | 0.008527944                                        | 6.196927909                           | 0.006775263                                             |
| 0.552503021                                 | 0.006406438                                        | 6.666398386                           | 0.004270828                                             |
| 0.578401095                                 | 0.005309722                                        | 6.803127276                           | 0.003659616                                             |
| 0.549161837                                 | 0.009241459                                        | 6.406866712                           | 0.006382405                                             |
| 0.438602078                                 | 0.039466816                                        | 5.566154129                           | 0.021147253                                             |
| 0.440161732                                 | 0.012590809                                        | 6.424845714                           | 0.008273067                                             |
| 0.560438667                                 | 0.006620773                                        | 6.717629695                           | 0.003588552                                             |
| 0.517818478                                 | 0.020896557                                        | 6.005754487                           | 0.012613744                                             |
| 0.53879696                                  | 0.009022028                                        | 6.836065814                           | 0.005049176                                             |
| 0.560843096                                 | 0.00720588                                         | 6.683773324                           | 0.005221467                                             |
| 0.566695443                                 | 0.00530223                                         | 6.576724354                           | 0.003661015                                             |
| 0.5344139                                   | 0.00798732                                         | 6.43287349                            | 0.003769475                                             |
| 0.581013386                                 | 0.005288727                                        | 6.798963462                           | 0.002240202                                             |
| 0.534850511                                 | 0.004749145                                        | 6.997409617                           | 0.001983091                                             |
| 0.438002842                                 | 0.088695993                                        | 5.528409969                           | 0.050039493                                             |
| 0.519471076                                 | 0.009758076                                        | 7.208394205                           | 0.004531715                                             |
| 0.555904016                                 | 0.008827017                                        | 6.459809575                           | 0.00432905                                              |
| 0.539287189                                 | 0.006284702                                        | 6.91401857                            | 0.003981381                                             |
| 0.549738125                                 | 0.006431545                                        | 6.746027628                           | 0.004348103                                             |
| 0.500107802                                 | 0.012654124                                        | 6.634647186                           | 0.006236233                                             |
| 0.522859422                                 | 0.016959239                                        | 6.073297463                           | 0.011299324                                             |
| 0.601848163                                 | 0.007336889                                        | 6.402758193                           | 0.003897435                                             |
| 0.489717336                                 | 0.007550031                                        | 6.762086318                           | 0.003720868                                             |
| 0.460155022                                 | 0.07393346                                         | 5.517272065                           | 0.030730936                                             |
| 0.495794806                                 | 0.016858224                                        | 6.168209482                           | 0.011024037                                             |
| 0.545807221                                 | 0.033882017                                        | 5.786678847                           | 0.027636336                                             |
| 0.519725296                                 | 0.011328162                                        | 6.708502641                           | 0.004636316                                             |
| 0.54319279                                  | 0.009911009                                        | 6.699565882                           | 0.006542295                                             |
| 0.559924538                                 | 0.012723884                                        | 6.660606025                           | 0.007940264                                             |
| 0.590437058                                 | 0.015157853                                        | 5.964000134                           | 0.011088                                                |
| 0.53723345                                  | 0.021566197                                        | 6.175186929                           | 0.012976011                                             |
| 0.459560308                                 | 0.00860757                                         | 6.533511176                           | 0.003656486                                             |
| 0.53315859                                  | 0.008396894                                        | 6.829773752                           | 0.004904316                                             |
| 0.504778861                                 | 0.007590453                                        | 6.864040695                           | 0.004565503                                             |
| 0.555581831                                 | 0.017416658                                        | 5.990678961                           | 0.014300319                                             |
| 0.529680782                                 | 0.007478838                                        | 6.970989805                           | 0.003971067                                             |
| 0.55525486                                  | 0.014593463                                        | 6.382274656                           | 0.011136784                                             |
| 0.50361573                                  | 0.008782505                                        | 6.671313963                           | 0.004057008                                             |
| 0.579884999                                 | 0.003042296                                        | 6.748219193                           | 0.002192424                                             |
| 0.502172004                                 | 0.005068077                                        | 7.087646857                           | 0.002315625                                             |
| 0.543956619                                 | 0.015876941                                        | 5.81052047                            | 0.012256992                                             |
| 0.512652289                                 | 0.006525711                                        | 6.886336178                           | 0.003125689                                             |
| 0.399119478                                 | 0.024581707                                        | 6.009628327                           | 0.015042881                                             |
| 0.532674746                                 | 0.004802255                                        | 7.147820156                           | 0.002874478                                             |
| 0.578399499                                 | 0.007946745                                        | 6.717580837                           | 0.005293617                                             |
| 0.458408288                                 | 0.014490846                                        | 6.557315475                           | 0.009499698                                             |
| 0.532313847                                 | 0.011761056                                        | 6.325144578                           | 0.008039601                                             |
| 0.533034923                                 | 0.005343453                                        | 6.882386519                           | 0.003523548                                             |
| 0.497311672                                 | 0.008382187                                        | 6.695459536                           | 0.003814839                                             |
| 0.520688405                                 | 0.014264658                                        | 6.69983656                            | 0.007703215                                             |
| 0.509405498                                 | 0.010417609                                        | 6.847672528                           | 0.006105735                                             |
| 0.506332304                                 | 0.012135675                                        | 6.287000315                           | 0.008850437                                             |
| 0.565977967                                 | 0.013579671                                        | 6.232418675                           | 0.009051993                                             |
| 0.468626973                                 | 0.021406456                                        | 6.073964389                           | 0.008163596                                             |
| 0.488122842                                 | 0.013897838                                        | 6.376791562                           | 0.008143822                                             |
| 0.560583546                                 | 0.006670705                                        | 6.788263638                           | 0.002610974                                             |
| 0.556954843                                 | 0.006186121                                        | 6.693691067                           | 0.004240432                                             |
| 0.521124432                                 | 0.011175826                                        | 6.487638057                           | 0.005958211                                             |
| 0.528701307                                 | 0.010386818                                        | 6.773031218                           | 0.007388178                                             |
| 0.471728853                                 | 0.008247578                                        | 6.744953941                           | 0.00310408                                              |
| 0.521893452                                 | 0.007089937                                        | 6.779333365                           | 0.002513981                                             |
| 0.542351524                                 | 0.020585184                                        | 5.788500299                           | 0.013355485                                             |
| 0.516534082                                 | 0.010073119                                        | 6.708837716                           | 0.00453245                                              |
| 0.576762856                                 | 0.006243892                                        | 6.45481982                            | 0.003539999                                             |
| 0.51849971                                  | 0.018705546                                        | 6.037480221                           | 0.009276178                                             |
| 0.485090564                                 | 0.028201064                                        | 6.663032788                           | 0.017321496                                             |
| 0.536710899                                 | 0.015708785                                        | 5.70228558                            | 0.010769502                                             |
| 0.520671544                                 | 0.011029342                                        | 6.745346579                           | 0.005256267                                             |
| 0.481406254                                 | 0.006347679                                        | 6.996593326                           | 0.003383398                                             |
| 0.552389322                                 | 0.010148461                                        | 6.508631685                           | 0.005561284                                             |
| 0.484555396                                 | 0.012298237                                        | 6.799788994                           | 0.004959887                                             |
| 0.59684247                                  | 0.004522839                                        | 6.681674293                           | 0.00317502                                              |
| 0.47683414                                  | 0.012299482                                        | 6.954308976                           | 0.006938962                                             |
| 0.585853085                                 | 0.012708675                                        | 6.145249787                           | 0.003681566                                             |
| 0.346005871                                 | 0.036600111                                        | 5.637588464                           | 0.023692485                                             |
| 0.549945715                                 | 0.008331113                                        | 6.687405447                           | 0.005717873                                             |



| log.sigma.5.0.mm.3D_ngtdm_Coarseness | log.sigma.5.0.mm.3D_ngtdm_Complexity | log.sigma.5.0.mm.3D_ngtdm_Strength | log.sigma.5.0.mm.3D_ngtdm_Busyness | log.sigma.5.0.mm.3D_ngtdm_Contrast |
|--------------------------------------|--------------------------------------|------------------------------------|------------------------------------|------------------------------------|
| 0.006997273                          | 0.335932061                          | 3.236743086                        | 0.169185912                        | 3.39E-05                           |
| 0.012223277                          | 0.121999438                          | 1.252145195                        | 0.665252669                        | 8.85E-05                           |
| 0.010305099                          | 0.182127643                          | 2.056722469                        | 0.34654972                         | 5.59E-05                           |
| 0.016651863                          | 0.305919865                          | 3.810873501                        | 0.161167643                        | 0.00010344                         |
| 0.006081866                          | 0.091334638                          | 1.094455978                        | 0.59975195                         | 2.34E-05                           |
| 0.017798256                          | 0.32505525                           | 3.030016022                        | 0.355003875                        | 0.000140724                        |
| 0.002491854                          | 0.110879025                          | 2.18622842                         | 0.687949262                        | 7.74E-06                           |
| 0.002933765                          | 0.130529137                          | 1.832558065                        | 0.333805804                        | 7.23E-06                           |
| 0.003304564                          | 0.105918324                          | 1.150627898                        | 0.542494671                        | 1.21E-05                           |
| 0.012636474                          | 0.412529683                          | 4.407228198                        | 0.128208923                        | 5.67E-05                           |
| 0.009386013                          | 0.129860584                          | 1.553419303                        | 0.441735767                        | 3.85E-05                           |
| 0.006170168                          | 0.147010608                          | 1.674883903                        | 0.390830774                        | 2.60E-05                           |
| 0.00837068                           | 0.141398444                          | 2.49889213                         | 0.263250328                        | 2.39E-05                           |
| 0.008937785                          | 0.261729323                          | 3.285678103                        | 0.167952811                        | 2.98E-05                           |
| 0.006569968                          | 0.233559126                          | 2.311287698                        | 0.304395218                        | 2.73E-05                           |
| 0.003220045                          | 0.10965                              | 1.107091712                        | 0.546040272                        | 1.61E-05                           |
| 0.010375819                          | 0.191388341                          | 2.1738262                          | 0.248657594                        | 5.81E-05                           |
| 0.011199289                          | 0.11162361                           | 1.382021427                        | 0.674841094                        | 6.83E-05                           |
| 0.010227544                          | 0.055601258                          | 0.794235932                        | 1.392374971                        | 6.42E-05                           |
| 0.002958262                          | 0.100664804                          | 1.085033253                        | 0.602858919                        | 1.15E-05                           |
| 0.00476008                           | 0.067608333                          | 0.94574092                         | 0.642903139                        | 1.38E-05                           |
| 0.013139111                          | 0.127161379                          | 1.503605568                        | 0.522359842                        | 7.31E-05                           |
| 0.015312691                          | 0.138608843                          | 2.019922685                        | 0.436602342                        | 8.32E-05                           |
| 0.004984381                          | 0.127189799                          | 1.380208786                        | 0.479040827                        | 1.68E-05                           |
| 0.008599642                          | 0.352065455                          | 2.391061096                        | 0.215349338                        | 5.11E-05                           |
| 0.005496006                          | 0.277871355                          | 2.68959587                         | 0.211144594                        | 2.28E-05                           |
| 0.004481652                          | 0.28685922                           | 3.541105512                        | 0.17033708                         | 1.30E-05                           |
| 0.005010689                          | 0.106543078                          | 1.350432505                        | 0.4425684                          | 1.62E-05                           |
| 0.031121444                          | 0.192843787                          | 2.619881814                        | 0.431039151                        | 0.000202945                        |
| 0.006775232                          | 0.097803433                          | 1.3863982                          | 0.437889316                        | 1.91E-05                           |
| 0.003066467                          | 0.107554431                          | 1.214931696                        | 0.492795728                        | 9.12E-06                           |
| 0.005977343                          | 0.100866921                          | 1.805615717                        | 0.326839861                        | 1.54E-05                           |
| 0.005221581                          | 0.162966023                          | 2.022811623                        | 0.29944638                         | 2.09E-05                           |
| 0.005909346                          | 0.288527896                          | 2.937380416                        | 0.198329833                        | 2.31E-05                           |
| 0.002946309                          | 0.120901703                          | 1.239875534                        | 0.486313719                        | 1.04E-05                           |
| 0.004629851                          | 0.10950753                           | 1.316902914                        | 0.444503667                        | 1.59E-05                           |
| 0.00381649                           | 0.191882691                          | 3.502683564                        | 0.183007188                        | 6.79E-06                           |
| 0.003616965                          | 0.148701707                          | 2.060787862                        | 0.29262633                         | 1.09E-05                           |
| 0.00975828                           | 0.039774574                          | 0.547466958                        | 1.198619234                        | 3.49E-05                           |
| 0.002370237                          | 0.073972338                          | 0.885560464                        | 0.811972454                        | 9.86E-06                           |
| 0.005798518                          | 0.153825345                          | 2.456768771                        | 0.217029369                        | 1.53E-05                           |
| 0.004094892                          | 0.198419949                          | 2.408256662                        | 0.309811367                        | 1.19E-05                           |
| 0.003644513                          | 0.152410222                          | 1.285226584                        | 0.457096617                        | 1.80E-05                           |
| 0.005044782                          | 0.171328245                          | 1.81031298                         | 0.373748922                        | 1.72E-05                           |
| 0.010282698                          | 0.168488623                          | 1.743782387                        | 0.509796899                        | 6.04E-05                           |
| 0.004865736                          | 0.22701492                           | 2.029948379                        | 0.286999376                        | 2.09E-05                           |
| 0.00305241                           | 0.072361053                          | 0.834267041                        | 0.705120741                        | 1.00E-05                           |
| 0.015044271                          | 0.060182084                          | 0.808111652                        | 1.709050467                        | 0.000125111                        |
| 0.016839861                          | 0.312545901                          | 3.840803376                        | 0.202456888                        | 7.63E-05                           |
| 0.009060602                          | 0.143759621                          | 1.479891682                        | 0.558640941                        | 4.30E-05                           |
| 0.005521919                          | 0.143861507                          | 1.381261809                        | 0.454199749                        | 3.15E-05                           |
| 0.004032326                          | 0.1377555                            | 1.143119009                        | 0.575320707                        | 2.28E-05                           |
| 0.003285961                          | 0.063356423                          | 0.796962324                        | 0.848511808                        | 1.17E-05                           |
| 0.010953542                          | 0.259808123                          | 1.81032497                         | 0.311566631                        | 7.48E-05                           |
| 0.010007379                          | 0.201203561                          | 1.760762134                        | 0.509007786                        | 7.45E-05                           |
| 0.007573094                          | 0.132209533                          | 1.955160625                        | 0.281269003                        | 2.07E-05                           |
| 0.003573246                          | 0.125788209                          | 1.217715164                        | 0.509888518                        | 1.58E-05                           |
| 0.004679563                          | 0.136699726                          | 2.380940203                        | 0.24506715                         | 1.22E-05                           |
| 0.008244537                          | 0.123272206                          | 1.511109973                        | 0.315207264                        | 2.43E-05                           |
| 0.001682596                          | 0.050811502                          | 0.675658087                        | 0.956242713                        | 4.50E-06                           |
| 0.008259641                          | 0.165500489                          | 2.169833092                        | 0.356234886                        | 2.85E-05                           |
| 0.00553282                           | 0.14195006                           | 1.569910516                        | 0.402169209                        | 2.34E-05                           |
| 0.002293302                          | 0.188754601                          | 1.983972589                        | 0.306884874                        | 5.84E-06                           |
| 0.002178411                          | 0.068530883                          | 0.992501105                        | 0.662589034                        | 5.23E-06                           |
| 0.014417577                          | 0.27442061                           | 2.278280919                        | 0.248626188                        | 7.70E-05                           |
| 0.004612401                          | 0.128916513                          | 2.374838335                        | 0.2496291                          | 7.89E-06                           |
| 0.011512288                          | 0.085699032                          | 1.88539741                         | 0.304760338                        | 1.71E-05                           |
| 0.002590726                          | 0.112735473                          | 1.53530092                         | 0.389969934                        | 6.03E-06                           |
| 0.002532036                          | 0.079188929                          | 0.961198481                        | 0.595266469                        | 8.44E-06                           |
| 0.00490959                           | 0.067368337                          | 0.862400367                        | 0.701523761                        | 1.67E-05                           |
| 0.011214877                          | 0.311791991                          | 4.093470057                        | 0.138368854                        | 3.41E-05                           |
| 0.003552762                          | 0.146672337                          | 1.812987269                        | 0.33213459                         | 1.03E-05                           |
| 0.00621505                           | 0.193093501                          | 2.538408298                        | 0.226795148                        | 1.99E-05                           |
| 0.006366786                          | 0.152711912                          | 1.598441896                        | 0.339623497                        | 2.77E-05                           |
| 0.005369425                          | 0.142845061                          | 1.83611228                         | 0.428273364                        | 2.17E-05                           |
| 0.009904748                          | 0.197771103                          | 2.452354702                        | 0.220198174                        | 3.54E-05                           |
| 0.005686779                          | 0.103123858                          | 1.19598147                         | 0.43773537                         | 1.73E-05                           |
| 0.016492058                          | 0.196312037                          | 3.56463447                         | 0.299988465                        | 6.12E-05                           |
| 0.008415395                          | 0.111142336                          | 1.442606181                        | 0.458496508                        | 3.27E-05                           |
| 0.006650198                          | 0.350060792                          | 4.501516159                        | 0.128163216                        | 2.62E-05                           |
| 0.007607823                          | 0.404333366                          | 4.250491945                        | 0.130683076                        | 3.49E-05                           |
| 0.008731059                          | 0.231758993                          | 4.377766872                        | 0.133553291                        | 1.28E-05                           |
| 0.004673164                          | 0.133660911                          | 1.743429482                        | 0.345038057                        | 1.54E-05                           |
| 0.00513397                           | 0.118636088                          | 2.051579804                        | 0.283213756                        | 1.13E-05                           |
| 0.006554499                          | 0.273171789                          | 3.229052899                        | 0.19406384                         | 2.32E-05                           |
| 0.010404422                          | 0.098864712                          | 1.622051108                        | 0.464126571                        | 3.67E-05                           |
| 0.006243784                          | 0.181101231                          | 2.09446145                         | 0.269436354                        | 2.69E-05                           |
| 0.004902832                          | 0.201762385                          | 2.002961517                        | 0.293031739                        | 1.58E-05                           |
| 0.008840058                          | 0.142655882                          | 1.493394852                        | 0.484488452                        | 4.42E-05                           |
| 0.007543432                          | 0.124821023                          | 1.641328847                        | 0.360453345                        | 2.97E-05                           |
| 0.010216912                          | 0.085326587                          | 1.179377294                        | 0.798615414                        | 8.92E-05                           |
| 0.005808796                          | 0.201754843                          | 1.874952                           | 0.394837318                        | 3.22E-05                           |
| 0.003078888                          | 0.087161539                          | 1.471083731                        | 0.385401684                        | 6.38E-06                           |
| 0.003941102                          | 0.107261007                          | 1.049082115                        | 0.569593094                        | 1.50E-05                           |
| 0.003520817                          | 0.062988579                          | 0.879669337                        | 0.684365689                        | 9.74E-06                           |
| 0.00447255                           | 0.260605466                          | 3.416314743                        | 0.176537962                        | 1.23E-05                           |
| 0.006610539                          | 0.115237723                          | 1.97858395                         | 0.343939018                        | 2.26E-05                           |
| 0.014148623                          | 0.364382708                          | 6.854901789                        | 0.083283586                        | 4.34E-05                           |
| 0.018387583                          | 0.09733751                           | 1.845510551                        | 0.32925387                         | 4.81E-05                           |
| 0.002299245                          | 0.066053902                          | 0.576476891                        | 1.051874871                        | 1.03E-05                           |

| log.sigma.4.5.mm.3D_gldm_GrayLevelVariance | log.sigma.4.5.mm.3D_gldm_HighGrayLevelEmphasis | log.sigma.4.5.mm.3D_gldm_GrayLevelNonUniformityNormalized | log.sigma.4.5.mm.3D_gldm_DependenceEntropy |
|--------------------------------------------|------------------------------------------------|-----------------------------------------------------------|--------------------------------------------|
| 31.01917971                                | 511.5419416                                    | 0.056268383                                               | 7.043106199                                |
| 10.37372988                                | 67.64705882                                    | 0.100840173                                               | 6.440963566                                |
| 19.55063625                                | 190.4713168                                    | 0.063249525                                               | 7.031906583                                |
| 27.00138393                                | 278.0470829                                    | 0.060571235                                               | 6.910762862                                |
| 13.93043437                                | 201.9028716                                    | 0.078912527                                               | 6.886692695                                |
| 17.44486685                                | 110.4212121                                    | 0.081432507                                               | 6.667216394                                |
| 19.46435966                                | 251.0684835                                    | 0.065168158                                               | 7.100829298                                |
| 20.26741549                                | 513.8326155                                    | 0.072656692                                               | 7.134456134                                |
| 20.72958189                                | 357.4109107                                    | 0.063371269                                               | 7.203800878                                |
| 19.2066153                                 | 542.3442164                                    | 0.067414792                                               | 6.803280503                                |
| 12.87886005                                | 134.3461538                                    | 0.078086633                                               | 6.833802384                                |
| 18.61216802                                | 265.0681128                                    | 0.067915547                                               | 6.959188884                                |
| 16.24304635                                | 224.4863417                                    | 0.094398841                                               | 6.999942046                                |
| 21.08435125                                | 350.4740827                                    | 0.07266843                                                | 7.067744356                                |
| 19.36145388                                | 245.2847782                                    | 0.073062829                                               | 6.898048682                                |
| 23.03141011                                | 283.8066728                                    | 0.059761112                                               | 7.016462841                                |
| 15.08387555                                | 288.80067                                      | 0.085626345                                               | 6.550298508                                |
| 13.62423197                                | 112.5888078                                    | 0.097836004                                               | 6.778226043                                |
| 9.832092042                                | 71.1972265                                     | 0.096110883                                               | 6.642897282                                |
| 22.91205505                                | 273.1042508                                    | 0.059716864                                               | 7.158399022                                |
| 11.56946796                                | 168.7218915                                    | 0.089820239                                               | 6.965946562                                |
| 12.50250421                                | 120.7859129                                    | 0.078869409                                               | 6.567265544                                |
| 15.6111908                                 | 131.4257813                                    | 0.077047348                                               | 6.797031991                                |
| 13.61391309                                | 192.7408387                                    | 0.081510614                                               | 6.966525344                                |
| 16.27212719                                | 347.8381775                                    | 0.073155741                                               | 6.743647748                                |
| 23.31477162                                | 462.5259603                                    | 0.067864945                                               | 6.953140898                                |
| 26.50545617                                | 584.6223322                                    | 0.06676882                                                | 7.110339497                                |
| 14.41960957                                | 237.7067343                                    | 0.082331015                                               | 6.915864116                                |
| 11.54270328                                | 83.46979866                                    | 0.095646342                                               | 6.213780678                                |
| 10.7511958                                 | 201.5783836                                    | 0.092991659                                               | 6.86315917                                 |
| 18.00984254                                | 388.4550231                                    | 0.069754954                                               | 7.173463867                                |
| 10.25944266                                | 334.6249396                                    | 0.121676263                                               | 6.631710077                                |
| 28.14374416                                | 326.8693094                                    | 0.056910791                                               | 7.160481436                                |
| 23.93296967                                | 363.0412766                                    | 0.063710276                                               | 7.024880123                                |
| 17.05521418                                | 370.8521798                                    | 0.069668623                                               | 6.999088643                                |
| 14.60854185                                | 349.2947649                                    | 0.076359231                                               | 6.964617389                                |
| 18.09729203                                | 584.4375168                                    | 0.095321548                                               | 7.041441981                                |
| 31.42298154                                | 532.0083317                                    | 0.053771709                                               | 7.49035582                                 |
| 4.741952541                                | 74.59349593                                    | 0.129068676                                               | 6.294595993                                |
| 28.86425646                                | 271.186795                                     | 0.052570739                                               | 7.245395347                                |
| 17.22635431                                | 434.5416345                                    | 0.089470155                                               | 7.001421697                                |
| 26.64659523                                | 323.7119214                                    | 0.058055842                                               | 7.07379391                                 |
| 21.27116008                                | 329.8201478                                    | 0.063265522                                               | 7.006857056                                |
| 15.80448597                                | 229.1663987                                    | 0.076663483                                               | 6.907684413                                |
| 15.6395336                                 | 118.7621283                                    | 0.080287323                                               | 6.737125445                                |
| 21.3818343                                 | 380.957377                                     | 0.064416906                                               | 7.084704376                                |
| 15.29841604                                | 272.9846559                                    | 0.076054673                                               | 7.044013941                                |
| 9.505753051                                | 60.92996556                                    | 0.098580224                                               | 6.523012288                                |
| 17.53732182                                | 165.7414806                                    | 0.071448396                                               | 6.827790034                                |
| 12.15827472                                | 93.65162722                                    | 0.085041665                                               | 6.828841312                                |
| 21.15534608                                | 280.3164656                                    | 0.062168463                                               | 6.987584276                                |
| 22.47065725                                | 264.5864729                                    | 0.060201215                                               | 6.942052582                                |
| 15.6239472                                 | 212.7861259                                    | 0.075323566                                               | 7.035046671                                |
| 15.15489048                                | 201.9574275                                    | 0.072595043                                               | 6.659433553                                |
| 19.11762338                                | 142.1774436                                    | 0.064669569                                               | 6.875293326                                |
| 13.38407784                                | 379.0369231                                    | 0.084083629                                               | 6.754666534                                |
| 22.31786408                                | 313.3386897                                    | 0.059969289                                               | 7.062998556                                |
| 20.28641015                                | 459.4543088                                    | 0.075780556                                               | 7.009267157                                |
| 10.21224314                                | 255.6820388                                    | 0.095212496                                               | 6.66493691                                 |
| 18.93113429                                | 357.8596779                                    | 0.06933462                                                | 7.375539813                                |
| 15.98268669                                | 190.1449604                                    | 0.0851519                                                 | 6.922216637                                |
| 19.19212165                                | 255.5453184                                    | 0.065833158                                               | 7.005537993                                |
| 21.13765085                                | 634.9941268                                    | 0.065769597                                               | 7.090847915                                |
| 21.07979812                                | 350.8288076                                    | 0.069998588                                               | 7.23291239                                 |
| 11.70150457                                | 165.5556962                                    | 0.082855312                                               | 6.82941817                                 |
| 18.60663341                                | 463.1372346                                    | 0.07832347                                                | 7.129209522                                |
| 6.733476396                                | 158.2461656                                    | 0.127255919                                               | 6.781772119                                |
| 22.71331441                                | 430.97312                                      | 0.068110797                                               | 7.212017513                                |
| 19.62941623                                | 401.3891071                                    | 0.069204231                                               | 7.101834601                                |
| 11.10897559                                | 195.0024155                                    | 0.086132318                                               | 6.950277704                                |
| 17.61263979                                | 338.4334103                                    | 0.08032649                                                | 6.886221395                                |
| 21.99463864                                | 463.0044289                                    | 0.065271977                                               | 7.206964856                                |
| 18.03745475                                | 450.6555507                                    | 0.076157703                                               | 6.92993929                                 |
| 20.15054356                                | 281.561753                                     | 0.067392032                                               | 6.891955454                                |
| 26.06851137                                | 262.5659534                                    | 0.059039222                                               | 7.213529275                                |
| 13.24291435                                | 286.6005961                                    | 0.087736346                                               | 6.743688261                                |
| 10.68446489                                | 198.234975                                     | 0.090027968                                               | 6.949860033                                |
| 16.08859031                                | 123.940501                                     | 0.090975458                                               | 6.773391281                                |
| 12.64953743                                | 173.7773872                                    | 0.082743135                                               | 6.795903076                                |
| 34.36083833                                | 568.9213339                                    | 0.060345415                                               | 7.003370006                                |
| 33.36612454                                | 554.899447                                     | 0.055962141                                               | 7.050093976                                |
| 14.01916697                                | 308.3924402                                    | 0.096243018                                               | 6.895800141                                |
| 19.74295291                                | 375.3117161                                    | 0.06996741                                                | 7.05645911                                 |
| 15.09517714                                | 294.8978197                                    | 0.081435159                                               | 6.902968264                                |
| 27.00868876                                | 365.197622                                     | 0.057751406                                               | 7.192818056                                |
| 12.6181394                                 | 144.808094                                     | 0.093105141                                               | 6.835124476                                |
| 23.78617126                                | 346.1429769                                    | 0.066958146                                               | 7.081299602                                |
| 17.84543644                                | 374.3967907                                    | 0.070163664                                               | 7.066974957                                |
| 13.90505045                                | 152.0157104                                    | 0.079425334                                               | 6.787979017                                |
| 16.69306606                                | 255.4375309                                    | 0.076619296                                               | 7.047996188                                |
| 15.28898105                                | 108.8619632                                    | 0.102900702                                               | 6.608175855                                |
| 23.57091424                                | 229.1838791                                    | 0.059838306                                               | 7.034179522                                |
| 17.46644265                                | 505.7289215                                    | 0.076493303                                               | 7.021031273                                |
| 15.2929854                                 | 272.4287879                                    | 0.076658219                                               | 6.91745517                                 |
| 14.58171778                                | 233.400046                                     | 0.07542657                                                | 6.926513032                                |
| 25.95784497                                | 672.3386908                                    | 0.067179364                                               | 7.277530824                                |
| 23.43186816                                | 240.1182109                                    | 0.061295656                                               | 7.142181462                                |
| 19.78574524                                | 422.0429799                                    | 0.098801415                                               | 6.926759828                                |
| 7.743008471                                | 113.2853717                                    | 0.103968624                                               | 6.543273763                                |
| 16.26852538                                | 222.1070315                                    | 0.070631052                                               | 7.033182984                                |

| log.sigma.4.5.mm.3D_gldm_DependenceNonUniformity | log.sigma.4.5.mm.3D_gldm_GrayLevelNonUniformity | log.sigma.4.5.mm.3D_gldm_SmallDependenceEmphasis |
|--------------------------------------------------|-------------------------------------------------|--------------------------------------------------|
| 359.8152686                                      | 119.401508                                      | 0.280341447                                      |
| 114.7283422                                      | 94.2855615                                      | 0.144398239                                      |
| 204.8435463                                      | 97.02477184                                     | 0.182641804                                      |
| 141.4462641                                      | 59.17809621                                     | 0.234978045                                      |
| 313.5371622                                      | 186.8648649                                     | 0.166472579                                      |
| 86.83333333                                      | 53.74545455                                     | 0.213129909                                      |
| 799.8182623                                      | 368.2652628                                     | 0.19427698                                       |
| 629.4761159                                      | 371.1303837                                     | 0.174805346                                      |
| 612.0127585                                      | 288.0857897                                     | 0.187003264                                      |
| 159.1007463                                      | 72.26865672                                     | 0.210091016                                      |
| 195.2002653                                      | 117.7546419                                     | 0.171986163                                      |
| 320.7596529                                      | 156.5453362                                     | 0.191132834                                      |
| 185.7123728                                      | 176.2426352                                     | 0.119821991                                      |
| 211.2317997                                      | 124.7716948                                     | 0.196685363                                      |
| 281.0241935                                      | 144.9566532                                     | 0.216126631                                      |
| 689.5255941                                      | 261.5146252                                     | 0.203305234                                      |
| 175.4288107                                      | 102.2378559                                     | 0.182427023                                      |
| 127.6926196                                      | 120.6317924                                     | 0.150134167                                      |
| 146.5947612                                      | 124.751926                                      | 0.125704927                                      |
| 763.6031929                                      | 310.4679746                                     | 0.206032233                                      |
| 312.1025132                                      | 271.6164021                                     | 0.131159629                                      |
| 154.7924004                                      | 85.10009268                                     | 0.165253443                                      |
| 127.7675781                                      | 78.89648438                                     | 0.166533072                                      |
| 329.5976577                                      | 215.7585946                                     | 0.172998097                                      |
| 190.5459544                                      | 93.12725844                                     | 0.23189644                                       |
| 358.8387505                                      | 160.7720557                                     | 0.238338153                                      |
| 457.2938447                                      | 215.8635942                                     | 0.212061661                                      |
| 344.4989138                                      | 227.3982621                                     | 0.165709287                                      |
| 56.37360179                                      | 42.75391499                                     | 0.153421057                                      |
| 231.9834469                                      | 191.0048685                                     | 0.134548641                                      |
| 582.4955864                                      | 331.8940731                                     | 0.175394608                                      |
| 204.7873369                                      | 251.7481875                                     | 0.121964761                                      |
| 494.8693094                                      | 183.7649427                                     | 0.221032076                                      |
| 349.6391489                                      | 149.7191489                                     | 0.218861348                                      |
| 616.2098093                                      | 306.8206176                                     | 0.205850841                                      |
| 362.8279426                                      | 229.0013338                                     | 0.167327797                                      |
| 383.7438861                                      | 354.6914808                                     | 0.150089645                                      |
| 668.2637086                                      | 277.5157915                                     | 0.18450171                                       |
| 141.6520325                                      | 158.7544715                                     | 0.096160812                                      |
| 1163.275378                                      | 382.189271                                      | 0.22343115                                       |
| 288.4980725                                      | 232.0855821                                     | 0.168211564                                      |
| 647.9025084                                      | 224.5019395                                     | 0.254171064                                      |
| 562.7267999                                      | 231.1089515                                     | 0.217261721                                      |
| 337.1615756                                      | 190.738746                                      | 0.196266674                                      |
| 163.3661972                                      | 102.6071987                                     | 0.179766739                                      |
| 380.775592                                       | 176.824408                                      | 0.226943674                                      |
| 583.4309513                                      | 346.9614204                                     | 0.178704691                                      |
| 95.74856487                                      | 85.86337543                                     | 0.122763833                                      |
| 108.2103408                                      | 60.80258519                                     | 0.181966574                                      |
| 148.535503                                       | 114.9763314                                     | 0.167448101                                      |
| 391.2467886                                      | 159.7107824                                     | 0.211955047                                      |
| 584.0584396                                      | 202.9382972                                     | 0.243432471                                      |
| 572.4867021                                      | 339.8599291                                     | 0.171544034                                      |
| 162.2427536                                      | 80.14492754                                     | 0.227130692                                      |
| 188.2165414                                      | 86.01052632                                     | 0.202173994                                      |
| 261.1548718                                      | 163.9630769                                     | 0.154148073                                      |
| 638.1278121                                      | 242.5757726                                     | 0.236876556                                      |
| 441.0728745                                      | 262.0491614                                     | 0.157280769                                      |
| 194.2584951                                      | 156.9101942                                     | 0.166898556                                      |
| 1080.69219                                       | 632.9557454                                     | 0.173685483                                      |
| 196.4552661                                      | 150.3782559                                     | 0.167923721                                      |
| 364.9490637                                      | 175.7745318                                     | 0.188133853                                      |
| 834.5373985                                      | 380.7401969                                     | 0.227743592                                      |
| 937.7191394                                      | 533.5992391                                     | 0.171879229                                      |
| 104.3594937                                      | 65.4556962                                      | 0.182065165                                      |
| 438.383739                                       | 302.4852408                                     | 0.144515552                                      |
| 109.6518405                                      | 165.9417178                                     | 0.088503315                                      |
| 835.08704                                        | 425.69248                                       | 0.195142652                                      |
| 783.0676114                                      | 405.3291788                                     | 0.226036235                                      |
| 318.7819186                                      | 249.6114562                                     | 0.135624318                                      |
| 156.0592764                                      | 104.3441109                                     | 0.200698685                                      |
| 549.4456876                                      | 280.0167832                                     | 0.180198268                                      |
| 298.8183414                                      | 173.563405                                      | 0.176919251                                      |
| 342.3085436                                      | 152.2386012                                     | 0.216729457                                      |
| 456.9163207                                      | 184.8518045                                     | 0.205868598                                      |
| 166.4679583                                      | 117.7421759                                     | 0.172303243                                      |
| 261.7712855                                      | 215.7070117                                     | 0.151947766                                      |
| 98.15031315                                      | 87.15448852                                     | 0.142623914                                      |
| 221.2062097                                      | 141.2425308                                     | 0.150414927                                      |
| 375.0820864                                      | 141.1479265                                     | 0.249618981                                      |
| 343.2684766                                      | 111.3086978                                     | 0.287123159                                      |
| 194.7365203                                      | 173.1411895                                     | 0.158107696                                      |
| 427.694402                                       | 228.7234628                                     | 0.179921177                                      |
| 403.2434103                                      | 250.2502441                                     | 0.149398884                                      |
| 357.399344                                       | 140.8556786                                     | 0.214292223                                      |
| 154.5587467                                      | 142.6370757                                     | 0.113832201                                      |
| 333.0654088                                      | 159.6951782                                     | 0.214841689                                      |
| 354.7476295                                      | 192.3887673                                     | 0.208875042                                      |
| 192.5532787                                      | 116.2786885                                     | 0.177269                                         |
| 239.6834568                                      | 155.1540741                                     | 0.173356595                                      |
| 112.8773006                                      | 134.1825153                                     | 0.132559005                                      |
| 377.1738035                                      | 142.5348447                                     | 0.23792226                                       |
| 676.2378931                                      | 396.4647887                                     | 0.186567953                                      |
| 452.5630303                                      | 252.9721212                                     | 0.197359955                                      |
| 605.1645221                                      | 328.2564338                                     | 0.172077043                                      |
| 403.9748685                                      | 229.8877849                                     | 0.19635788                                       |
| 412.9943202                                      | 172.6698616                                     | 0.171214503                                      |
| 98.49188157                                      | 103.4450812                                     | 0.145324483                                      |
| 94.88489209                                      | 86.70983213                                     | 0.095688343                                      |
| 758.7485279                                      | 407.8236924                                     | 0.186547558                                      |

| log.sigma.4.5.mm.3D_gldm_DependenceNonUniformityNormalized | log.sigma.4.5.mm.3D_gldm_DependenceVariance | log.sigma.4.5.mm.3D_gldm_LargeDependenceEmphasis |
|------------------------------------------------------------|---------------------------------------------|--------------------------------------------------|
| 0.169564217                                                | 5.423373109                                 | 16.82752121                                      |
| 0.122704109                                                | 6.475868341                                 | 28.09090909                                      |
| 0.133535558                                                | 5.003595172                                 | 22.22555411                                      |
| 0.144776115                                                | 5.75842955                                  | 20.12384852                                      |
| 0.132405896                                                | 6.119966673                                 | 24.79054054                                      |
| 0.131565657                                                | 12.37572084                                 | 32.27272727                                      |
| 0.141535704                                                | 5.030024268                                 | 20.72429658                                      |
| 0.123233382                                                | 6.25585643                                  | 25.54150352                                      |
| 0.134626652                                                | 5.750886524                                 | 22.76242851                                      |
| 0.148414875                                                | 5.160388589                                 | 19.68843284                                      |
| 0.129443147                                                | 5.827420864                                 | 24.45225464                                      |
| 0.139158201                                                | 5.229797714                                 | 21.32364425                                      |
| 0.099471008                                                | 10.63423272                                 | 41.08784146                                      |
| 0.123023762                                                | 8.793175511                                 | 28.25684333                                      |
| 0.141645259                                                | 5.529721644                                 | 20.5766129                                       |
| 0.157569834                                                | 3.69260095                                  | 17.2321755                                       |
| 0.146925302                                                | 4.010552483                                 | 19.38693467                                      |
| 0.103562546                                                | 10.79878891                                 | 37.46390916                                      |
| 0.112938953                                                | 8.7126645                                   | 34.19260401                                      |
| 0.146875013                                                | 4.820493873                                 | 19.52010002                                      |
| 0.103208503                                                | 8.584923784                                 | 36.23082011                                      |
| 0.143459129                                                | 4.889262618                                 | 21.9823911                                       |
| 0.124773026                                                | 6.747421265                                 | 26.54296875                                      |
| 0.124517438                                                | 7.570378196                                 | 27.52058935                                      |
| 0.149682604                                                | 4.637681893                                 | 18.10133543                                      |
| 0.151472668                                                | 4.704860748                                 | 17.88644998                                      |
| 0.141445668                                                | 4.962009757                                 | 19.93721002                                      |
| 0.124728064                                                | 7.09984317                                  | 27.20347574                                      |
| 0.12611544                                                 | 8.690669589                                 | 30.2393736                                       |
| 0.112942282                                                | 7.974624761                                 | 32.52872444                                      |
| 0.122424461                                                | 6.943814104                                 | 26.66204288                                      |
| 0.098978897                                                | 9.48023494                                  | 39.53649106                                      |
| 0.153257761                                                | 4.575878385                                 | 18.08702385                                      |
| 0.148782617                                                | 4.853525758                                 | 18.86978723                                      |
| 0.139920483                                                | 5.060823865                                 | 20.47411444                                      |
| 0.120982975                                                | 6.560041966                                 | 26.88062688                                      |
| 0.103129236                                                | 10.19153304                                 | 36.88551465                                      |
| 0.129483377                                                | 14.01986656                                 | 35.73319124                                      |
| 0.115164254                                                | 7.049311918                                 | 35.52845528                                      |
| 0.160010368                                                | 3.850250715                                 | 16.47180193                                      |
| 0.111217453                                                | 8.877447452                                 | 31.70624518                                      |
| 0.16754655                                                 | 3.656089945                                 | 14.86914921                                      |
| 0.154045114                                                | 3.9671948                                   | 17.26882015                                      |
| 0.135515103                                                | 5.745912858                                 | 22.31028939                                      |
| 0.127829575                                                | 6.131609689                                 | 24.58528951                                      |
| 0.138716063                                                | 5.350456037                                 | 20.24808743                                      |
| 0.127889292                                                | 6.694158                                    | 25.35686103                                      |
| 0.109929466                                                | 8.450052133                                 | 34.98851894                                      |
| 0.127156687                                                | 5.769428653                                 | 24.23619271                                      |
| 0.109863538                                                | 9.250628042                                 | 32.66420118                                      |
| 0.152295363                                                | 4.234576373                                 | 17.98715453                                      |
| 0.173259697                                                | 3.888062814                                 | 15.20646692                                      |
| 0.126880918                                                | 5.862520866                                 | 24.80585106                                      |
| 0.146959016                                                | 4.311197096                                 | 18.22463768                                      |
| 0.141516197                                                | 5.705672452                                 | 21.44210526                                      |
| 0.133925575                                                | 5.072551216                                 | 23.99282051                                      |
| 0.157757185                                                | 4.457124714                                 | 17.12509271                                      |
| 0.127551439                                                | 5.689590127                                 | 25.46096009                                      |
| 0.1178753                                                  | 6.684311375                                 | 27.65048544                                      |
| 0.118380128                                                | 10.67684108                                 | 32.82320079                                      |
| 0.111243073                                                | 7.57514214                                  | 29.95243488                                      |
| 0.136685043                                                | 5.544247219                                 | 22.25917603                                      |
| 0.144159164                                                | 5.021974921                                 | 19.22767317                                      |
| 0.123011825                                                | 6.84429539                                  | 26.57523285                                      |
| 0.132100625                                                | 4.991123217                                 | 22.86582278                                      |
| 0.113512102                                                | 9.472393645                                 | 33.6965303                                       |
| 0.084088835                                                | 15.05417027                                 | 58.6303681                                       |
| 0.133613926                                                | 6.255624294                                 | 23.26432                                         |
| 0.133697731                                                | 6.748188376                                 | 22.8453133                                       |
| 0.110000662                                                | 8.43886005                                  | 33.97308489                                      |
| 0.120138011                                                | 7.147321828                                 | 26.23325635                                      |
| 0.128075918                                                | 6.013446134                                 | 24.31748252                                      |
| 0.131118184                                                | 5.705488096                                 | 23.5792014                                       |
| 0.151531006                                                | 4.291499586                                 | 17.96414343                                      |
| 0.145933031                                                | 5.757294815                                 | 20.94762057                                      |
| 0.124044678                                                | 5.95980375                                  | 25.19672131                                      |
| 0.109253458                                                | 8.278919931                                 | 32.47579299                                      |
| 0.102453354                                                | 9.615556941                                 | 36.81210856                                      |
| 0.129587703                                                | 6.067375489                                 | 26.03104862                                      |
| 0.16036002                                                 | 3.792838171                                 | 15.60538692                                      |
| 0.172583447                                                | 5.591679324                                 | 16.80693816                                      |
| 0.108247093                                                | 9.350895022                                 | 33.69927738                                      |
| 0.130833405                                                | 5.086005423                                 | 22.73936984                                      |
| 0.131221416                                                | 5.428425294                                 | 24.87959649                                      |
| 0.146535196                                                | 5.069192184                                 | 19.51168512                                      |
| 0.10088691                                                 | 9.10035006                                  | 39.66710183                                      |
| 0.139650067                                                | 5.840737664                                 | 21.2591195                                       |
| 0.129375503                                                | 7.389368502                                 | 24.92414296                                      |
| 0.131525464                                                | 7.201646436                                 | 25.77868852                                      |
| 0.118362201                                                | 7.302448773                                 | 27.99259259                                      |
| 0.086562347                                                | 14.21078136                                 | 49.62423313                                      |
| 0.158343326                                                | 4.701061206                                 | 17.39882452                                      |
| 0.130472293                                                | 5.946944345                                 | 23.54871696                                      |
| 0.137140312                                                | 5.900055096                                 | 22.33939394                                      |
| 0.139054348                                                | 4.926407864                                 | 21.83226103                                      |
| 0.11805227                                                 | 8.754948641                                 | 28.96551724                                      |
| 0.146607852                                                | 5.843253768                                 | 22.59886404                                      |
| 0.094070565                                                | 11.65587037                                 | 41.82712512                                      |
| 0.113770854                                                | 6.909994307                                 | 34.8705036                                       |
| 0.131407781                                                | 6.120220128                                 | 23.77069622                                      |

| log.sigma.4.5.mm.3D_gldm_LargeDependenceLowGrayLevelEmphasis | log.sigma.4.5.mm.3D_gldm_SmallDependenceHighGrayLevelEmphasis | log.sigma.4.5.mm.3D_gldm_LargeDependenceHighGrayLevelEmphasis |
|--------------------------------------------------------------|---------------------------------------------------------------|---------------------------------------------------------------|
| 0.04065258                                                   | 127.8042908                                                   | 9144.796418                                                   |
| 0.875483582                                                  | 10.8780204                                                    | 1522.742246                                                   |
| 0.188557054                                                  | 32.38042595                                                   | 4388.03455                                                    |
| 0.195577722                                                  | 60.5604254                                                    | 5376.812692                                                   |
| 0.161033798                                                  | 33.24010883                                                   | 4714.021115                                                   |
| 0.720702207                                                  | 29.96902923                                                   | 2273.330303                                                   |
| 0.126907319                                                  | 50.60894369                                                   | 4644.556008                                                   |
| 0.06059132                                                   | 91.43604403                                                   | 12207.34789                                                   |
| 0.084167738                                                  | 63.10981321                                                   | 7739.159261                                                   |
| 0.043034293                                                  | 108.8372094                                                   | 10517.97854                                                   |
| 0.319835562                                                  | 21.52571522                                                   | 3179.708223                                                   |
| 0.118040868                                                  | 49.17106291                                                   | 5304.835575                                                   |
| 0.278779178                                                  | 27.67897002                                                   | 8131.478307                                                   |
| 0.103575344                                                  | 65.9177021                                                    | 8954.015143                                                   |
| 0.120730463                                                  | 48.20122132                                                   | 5219.237399                                                   |
| 0.109863533                                                  | 56.77387913                                                   | 4710.106033                                                   |
| 0.07945686                                                   | 47.3064962                                                    | 6055.383585                                                   |
| 0.573883835                                                  | 19.38955484                                                   | 3180.931062                                                   |
| 1.005668374                                                  | 8.703749102                                                   | 1981.543914                                                   |
| 0.113109389                                                  | 59.0108251                                                    | 4769.857473                                                   |
| 0.31777994                                                   | 23.90882233                                                   | 5300.484458                                                   |
| 0.412377657                                                  | 19.44839531                                                   | 2434.700649                                                   |
| 0.379575606                                                  | 22.4684448                                                    | 3063.339844                                                   |
| 0.191288192                                                  | 31.72150787                                                   | 4817.518323                                                   |
| 0.061271588                                                  | 71.86079887                                                   | 6214.307934                                                   |
| 0.048435765                                                  | 108.1020394                                                   | 8287.92233                                                    |
| 0.045288249                                                  | 120.239242                                                    | 11644.3786                                                    |
| 0.151816622                                                  | 39.51980781                                                   | 5943.152788                                                   |
| 0.911651918                                                  | 14.65244301                                                   | 1569.742729                                                   |
| 0.203229503                                                  | 27.83649856                                                   | 6067.706913                                                   |
| 0.086014923                                                  | 66.39290751                                                   | 9654.763976                                                   |
| 0.120124384                                                  | 34.11480638                                                   | 14022.60851                                                   |
| 0.097015171                                                  | 65.09474048                                                   | 6306.887272                                                   |
| 0.072461845                                                  | 72.23057782                                                   | 7009.706809                                                   |
| 0.069428374                                                  | 73.9340051                                                    | 7406.090599                                                   |
| 0.096616092                                                  | 55.61260113                                                   | 8932.47049                                                    |
| 0.071013223                                                  | 84.01347539                                                   | 20844.80462                                                   |
| 0.096427362                                                  | 98.85188585                                                   | 15598.49506                                                   |
| 0.553392966                                                  | 6.483143058                                                   | 2843.925203                                                   |
| 0.154947909                                                  | 61.1799361                                                    | 4290.566162                                                   |
| 0.079515171                                                  | 64.85521988                                                   | 14591.88319                                                   |
| 0.070115522                                                  | 88.03489087                                                   | 4661.358159                                                   |
| 0.069345247                                                  | 66.63242635                                                   | 5702.448125                                                   |
| 0.124342681                                                  | 42.95704569                                                   | 5284.616559                                                   |
| 0.398923875                                                  | 24.29257392                                                   | 2260.841941                                                   |
| 0.075142083                                                  | 80.59461912                                                   | 7547.852823                                                   |
| 0.118377046                                                  | 49.49994375                                                   | 6444.395441                                                   |
| 1.368795716                                                  | 8.389183834                                                   | 1616.799082                                                   |
| 0.303030735                                                  | 32.73217592                                                   | 3511.844888                                                   |
| 0.764635544                                                  | 16.7346681                                                    | 2219.258136                                                   |
| 0.121113553                                                  | 56.09761541                                                   | 4950.65979                                                    |
| 0.088058792                                                  | 63.8536976                                                    | 3914.697419                                                   |
| 0.157046931                                                  | 36.32146838                                                   | 5059.326463                                                   |
| 0.129674327                                                  | 43.50230412                                                   | 3455.290761                                                   |
| 0.343043659                                                  | 28.43975966                                                   | 2582.606015                                                   |
| 0.072428529                                                  | 57.57317302                                                   | 8927.909744                                                   |
| 0.074834576                                                  | 70.40560405                                                   | 5270.330037                                                   |
| 0.069372597                                                  | 63.12959371                                                   | 12068.31087                                                   |
| 0.118008395                                                  | 37.71395626                                                   | 7111.887136                                                   |
| 0.119589532                                                  | 61.24750939                                                   | 10568.53007                                                   |
| 0.231026105                                                  | 35.99781068                                                   | 4688.249151                                                   |
| 0.143550247                                                  | 48.15238633                                                   | 5298.794007                                                   |
| 0.037884832                                                  | 141.0153135                                                   | 11743.39005                                                   |
| 0.105890892                                                  | 69.00544337                                                   | 8013.917093                                                   |
| 0.167927723                                                  | 29.87590764                                                   | 3994.672152                                                   |
| 0.089327139                                                  | 68.50036182                                                   | 13855.52149                                                   |
| 0.438666544                                                  | 13.02979604                                                   | 8683.945552                                                   |
| 0.068057361                                                  | 85.47135381                                                   | 9737.55968                                                    |
| 0.063588191                                                  | 78.83410103                                                   | 9407.112173                                                   |
| 0.24209184                                                   | 26.17974869                                                   | 5869.956867                                                   |
| 0.110946374                                                  | 65.16057203                                                   | 8587.785219                                                   |
| 0.066673033                                                  | 84.81486327                                                   | 10297.86597                                                   |
| 0.062497793                                                  | 72.45901784                                                   | 10643.00483                                                   |
| 0.09243996                                                   | 55.46955611                                                   | 5352.226649                                                   |
| 0.137410635                                                  | 59.67774458                                                   | 5010.606196                                                   |
| 0.094411784                                                  | 43.13505659                                                   | 7778.865872                                                   |
| 0.203243446                                                  | 28.03104375                                                   | 6191.520451                                                   |
| 0.588499646                                                  | 23.19081165                                                   | 3237.72547                                                    |
| 0.214639362                                                  | 27.52441378                                                   | 4144.814294                                                   |
| 0.039724838                                                  | 126.055504                                                    | 9904.381787                                                   |
| 0.039774439                                                  | 143.7506479                                                   | 9910.835093                                                   |
| 0.14017768                                                   | 47.72338331                                                   | 10553.87215                                                   |
| 0.074140351                                                  | 63.11664569                                                   | 8343.964515                                                   |
| 0.134840198                                                  | 39.8809827                                                    | 7575.906606                                                   |
| 0.088204909                                                  | 77.07817439                                                   | 7180.326773                                                   |
| 0.421876447                                                  | 18.6782562                                                    | 4775.003916                                                   |
| 0.094508568                                                  | 66.51516338                                                   | 7705.715304                                                   |
| 0.083263703                                                  | 77.94149655                                                   | 8523.595186                                                   |
| 0.293520748                                                  | 27.4582911                                                    | 3550.224727                                                   |
| 0.14489466                                                   | 44.41473077                                                   | 6798.44                                                       |
| 1.073624499                                                  | 17.99562108                                                   | 3384.881902                                                   |
| 0.154140907                                                  | 52.7959743                                                    | 3839.944584                                                   |
| 0.051536716                                                  | 88.0812878                                                    | 12052.15416                                                   |
| 0.103997753                                                  | 51.57891089                                                   | 5808.934242                                                   |
| 0.123152373                                                  | 39.12449582                                                   | 5217.155101                                                   |
| 0.053111403                                                  | 129.5112486                                                   | 17939.49006                                                   |
| 0.16666499                                                   | 41.08416064                                                   | 5127.758963                                                   |
| 0.168567727                                                  | 55.63830598                                                   | 18415.00191                                                   |
| 0.388714087                                                  | 9.637544549                                                   | 4129.311751                                                   |
| 0.162184396                                                  | 41.72928186                                                   | 4575.352269                                                   |

| log.sigma.4.5.mm.3D_gldm_SmallDependenceLowGrayLevelEmphasis | log.sigma.4.5.mm.3D_gldm_LowGrayLevelEmphasis | log.sigma.4.5.mm.3D_gldm_DistanceZoneVariabilityNormalized |
|--------------------------------------------------------------|-----------------------------------------------|------------------------------------------------------------|
| 0.001564777                                                  | 0.004204379                                   | 0.997222228                                                |
| 0.006401899                                                  | 0.038489402                                   | 1                                                          |
| 0.003711203                                                  | 0.01098177                                    | 1                                                          |
| 0.002812108                                                  | 0.010495565                                   | 1                                                          |
| 0.001860615                                                  | 0.007683389                                   | 1                                                          |
| 0.004010066                                                  | 0.023948869                                   | 1                                                          |
| 0.001366957                                                  | 0.006398328                                   | 0.996779396                                                |
| 0.000623811                                                  | 0.00289434                                    | 1                                                          |
| 0.001163661                                                  | 0.004235457                                   | 1                                                          |
| 0.001562692                                                  | 0.00328914                                    | 1                                                          |
| 0.003052345                                                  | 0.016545574                                   | 1                                                          |
| 0.001576056                                                  | 0.006714937                                   | 0.996047446                                                |
| 0.00173135                                                   | 0.010840044                                   | 1                                                          |
| 0.001837504                                                  | 0.00524639                                    | 1                                                          |
| 0.002603761                                                  | 0.009078255                                   | 1                                                          |
| 0.001674785                                                  | 0.006840492                                   | 1                                                          |
| 0.002375299                                                  | 0.006449152                                   | 1                                                          |
| 0.003523109                                                  | 0.016015991                                   | 1                                                          |
| 0.006414659                                                  | 0.032604611                                   | 1                                                          |
| 0.001545624                                                  | 0.006375554                                   | 1                                                          |
| 0.001438847                                                  | 0.009891307                                   | 1                                                          |
| 0.003588769                                                  | 0.017058319                                   | 1                                                          |
| 0.003545953                                                  | 0.016821785                                   | 1                                                          |
| 0.00253467                                                   | 0.008385956                                   | 1                                                          |
| 0.00200275                                                   | 0.004568815                                   | 1                                                          |
| 0.001503319                                                  | 0.004009757                                   | 1                                                          |
| 0.001070031                                                  | 0.003251877                                   | 1                                                          |
| 0.001924054                                                  | 0.006938567                                   | 1                                                          |
| 0.005193223                                                  | 0.024643829                                   | 1                                                          |
| 0.001644989                                                  | 0.007097197                                   | 1                                                          |
| 0.000952208                                                  | 0.003584691                                   | 1                                                          |
| 0.001492163                                                  | 0.004717818                                   | 1                                                          |
| 0.002206345                                                  | 0.00769626                                    | 0.997630335                                                |
| 0.002454512                                                  | 0.006515523                                   | 1                                                          |
| 0.001068391                                                  | 0.003976869                                   | 1                                                          |
| 0.0010865                                                    | 0.004243932                                   | 1                                                          |
| 0.000796488                                                  | 0.002742048                                   | 1                                                          |
| 0.000754246                                                  | 0.002989439                                   | 1                                                          |
| 0.003479814                                                  | 0.020213001                                   | 1                                                          |
| 0.002081042                                                  | 0.009296424                                   | 1                                                          |
| 0.001141959                                                  | 0.003878537                                   | 1                                                          |
| 0.001791688                                                  | 0.005567682                                   | 1                                                          |
| 0.001578677                                                  | 0.005248148                                   | 0.9978355                                                  |
| 0.002360361                                                  | 0.007750596                                   | 1                                                          |
| 0.004345941                                                  | 0.017289222                                   | 1                                                          |
| 0.001424508                                                  | 0.004678643                                   | 1                                                          |
| 0.001209974                                                  | 0.005391387                                   | 1                                                          |
| 0.004923996                                                  | 0.039019579                                   | 1                                                          |
| 0.002630477                                                  | 0.014962826                                   | 1                                                          |
| 0.005748491                                                  | 0.022797051                                   | 1                                                          |
| 0.001918588                                                  | 0.00884383                                    | 1                                                          |
| 0.002012817                                                  | 0.006434947                                   | 1                                                          |
| 0.001584707                                                  | 0.007542088                                   | 1                                                          |
| 0.002894255                                                  | 0.008463015                                   | 1                                                          |
| 0.003881066                                                  | 0.016044128                                   | 1                                                          |
| 0.001218189                                                  | 0.0037954                                     | 1                                                          |
| 0.001852887                                                  | 0.005568623                                   | 1                                                          |
| 0.001062624                                                  | 0.004033493                                   | 1                                                          |
| 0.002138208                                                  | 0.005859091                                   | 1                                                          |
| 0.000883867                                                  | 0.003941155                                   | 0.997759106                                                |
| 0.002066263                                                  | 0.008184473                                   | 1                                                          |
| 0.001680682                                                  | 0.007058065                                   | 1                                                          |
| 0.000678816                                                  | 0.002255671                                   | 0.996015952                                                |
| 0.00078158                                                   | 0.004348995                                   | 0.99726963                                                 |
| 0.003280794                                                  | 0.009891187                                   | 1                                                          |
| 0.000813737                                                  | 0.003066375                                   | 1                                                          |
| 0.001761189                                                  | 0.009269569                                   | 1                                                          |
| 0.001060247                                                  | 0.003724198                                   | 0.998589563                                                |
| 0.001300807                                                  | 0.003685511                                   | 1                                                          |
| 0.001492216                                                  | 0.007954902                                   | 1                                                          |
| 0.001495184                                                  | 0.006610967                                   | 1                                                          |
| 0.000855118                                                  | 0.003196441                                   | 1                                                          |
| 0.001102582                                                  | 0.003998223                                   | 1                                                          |
| 0.002295696                                                  | 0.00769807                                    | 1                                                          |
| 0.001925351                                                  | 0.007392528                                   | 1                                                          |
| 0.002162967                                                  | 0.005832275                                   | 1                                                          |
| 0.001997936                                                  | 0.007670925                                   | 1                                                          |
| 0.002259718                                                  | 0.018044941                                   | 1                                                          |
| 0.002013531                                                  | 0.009166226                                   | 1                                                          |
| 0.001666365                                                  | 0.004230901                                   | 1                                                          |
| 0.00173722                                                   | 0.004224169                                   | 1                                                          |
| 0.001958206                                                  | 0.006879196                                   | 1                                                          |
| 0.001140766                                                  | 0.003987678                                   | 1                                                          |
| 0.001255755                                                  | 0.006105754                                   | 1                                                          |
| 0.001300923                                                  | 0.006191669                                   | 0.996779396                                                |
| 0.002005436                                                  | 0.011134157                                   | 1                                                          |
| 0.001637312                                                  | 0.006687465                                   | 1                                                          |
| 0.001303998                                                  | 0.003868343                                   | 1                                                          |
| 0.002305091                                                  | 0.01390041                                    | 1                                                          |
| 0.002211407                                                  | 0.007270944                                   | 1                                                          |
| 0.002318581                                                  | 0.017338896                                   | 1                                                          |
| 0.002427827                                                  | 0.010376511                                   | 1                                                          |
| 0.001012175                                                  | 0.002976528                                   | 1                                                          |
| 0.001451736                                                  | 0.005751952                                   | 1                                                          |
| 0.001710502                                                  | 0.007255657                                   | 1                                                          |
| 0.000801407                                                  | 0.002371651                                   | 1                                                          |
| 0.001872503                                                  | 0.008733701                                   | 1                                                          |
| 0.001107922                                                  | 0.008192569                                   | 1                                                          |
| 0.002347572                                                  | 0.015604537                                   | 1                                                          |
| 0.00215023                                                   | 0.007247203                                   | 1                                                          |

| log.sigma.4.5.mm.3D_gldzm_LowIntensityEmphasis | log.sigma.4.5.mm.3D_gldzm_LargeDistanceEmphasis | log.sigma.4.5.mm.3D_gldzm_HighIntensitySmallDistanceEmphasis |
|------------------------------------------------|-------------------------------------------------|--------------------------------------------------------------|
| 0.006035212                                    | 1.004172462                                     | 460.1947149                                                  |
| 0.052946865                                    | 1                                               | 80.20666667                                                  |
| 0.020201758                                    | 1                                               | 178.381877                                                   |
| 0.013711326                                    | 1                                               | 261.5036232                                                  |
| 0.011395289                                    | 1                                               | 199.9726027                                                  |
| 0.022094104                                    | 1                                               | 144.7988166                                                  |
| 0.007612889                                    | 1.00483871                                      | 266.7147177                                                  |
| 0.004196119                                    | 1                                               | 536.1629328                                                  |
| 0.006273485                                    | 1                                               | 338.1317671                                                  |
| 0.006568033                                    | 1                                               | 526.9562044                                                  |
| 0.021748802                                    | 1                                               | 127.2741935                                                  |
| 0.009342015                                    | 1.005940594                                     | 256.4257426                                                  |
| 0.020605522                                    | 1                                               | 234.1255061                                                  |
| 0.009557102                                    | 1                                               | 344.1085271                                                  |
| 0.013547872                                    | 1                                               | 227.7188119                                                  |
| 0.008461628                                    | 1                                               | 282.889115                                                   |
| 0.012194844                                    | 1                                               | 259.5513308                                                  |
| 0.022814804                                    | 1                                               | 135.5812808                                                  |
| 0.052732599                                    | 1                                               | 71.40101523                                                  |
| 0.007696193                                    | 1                                               | 293.0803213                                                  |
| 0.012629235                                    | 1                                               | 186.0552885                                                  |
| 0.02208722                                     | 1                                               | 123.0358974                                                  |
| 0.021552551                                    | 1                                               | 139.915                                                      |
| 0.014329457                                    | 1                                               | 186.094162                                                   |
| 0.008166828                                    | 1                                               | 317.754491                                                   |
| 0.006241002                                    | 1                                               | 459.1577381                                                  |
| 0.005131361                                    | 1                                               | 575.5579897                                                  |
| 0.011545035                                    | 1                                               | 246.5380228                                                  |
| 0.030273844                                    | 1                                               | 107.4235294                                                  |
| 0.012169854                                    | 1                                               | 205.7337662                                                  |
| 0.005434507                                    | 1                                               | 380.3289617                                                  |
| 0.012943398                                    | 1                                               | 267.6882129                                                  |
| 0.010862949                                    | 1.003558719                                     | 294.3454923                                                  |
| 0.011752246                                    | 1                                               | 329.4440735                                                  |
| 0.005208241                                    | 1                                               | 364.7518939                                                  |
| 0.006898932                                    | 1                                               | 335.9649446                                                  |
| 0.005814199                                    | 1                                               | 556.8493151                                                  |
| 0.00418301                                     | 1                                               | 536.0413534                                                  |
| 0.041989291                                    | 1                                               | 65.90163934                                                  |
| 0.010198361                                    | 1                                               | 280.5842405                                                  |
| 0.007129256                                    | 1                                               | 376.578629                                                   |
| 0.006915622                                    | 1                                               | 344.8336106                                                  |
| 0.007700956                                    | 1.003250271                                     | 312.8605092                                                  |
| 0.012049783                                    | 1                                               | 218.9791304                                                  |
| 0.023385035                                    | 1                                               | 143.0187266                                                  |
| 0.006486902                                    | 1                                               | 358.7129121                                                  |
| 0.007228812                                    | 1                                               | 283.0181237                                                  |
| 0.046536308                                    | 1                                               | 70.79831933                                                  |
| 0.01727012                                     | 1                                               | 189.4130435                                                  |
| 0.031843305                                    | 1                                               | 105.9924528                                                  |
| 0.010718695                                    | 1                                               | 263.6949686                                                  |
| 0.00803266                                     | 1                                               | 267.4671385                                                  |
| 0.01033679                                     | 1                                               | 215.3261391                                                  |
| 0.012480834                                    | 1                                               | 198.9094077                                                  |
| 0.019180283                                    | 1                                               | 145.8167702                                                  |
| 0.007523622                                    | 1                                               | 379.6816817                                                  |
| 0.007846657                                    | 1                                               | 301.260177                                                   |
| 0.007558911                                    | 1                                               | 391.5                                                        |
| 0.012088423                                    | 1                                               | 225.2601881                                                  |
| 0.005291813                                    | 1.003365115                                     | 353.1975603                                                  |
| 0.011776055                                    | 1                                               | 225.0825959                                                  |
| 0.009169029                                    | 1                                               | 261.933913                                                   |
| 0.003033573                                    | 1.005988024                                     | 626.5598802                                                  |
| 0.005310431                                    | 1.004101162                                     | 412.2879357                                                  |
| 0.017074251                                    | 1                                               | 174.6582278                                                  |
| 0.005570064                                    | 1                                               | 480.3958665                                                  |
| 0.022176807                                    | 1                                               | 148.9661017                                                  |
| 0.005531718                                    | 1.002117149                                     | 441.9677135                                                  |
| 0.005748044                                    | 1                                               | 348.189899                                                   |
| 0.011795597                                    | 1                                               | 196.7396313                                                  |
| 0.009867832                                    | 1                                               | 324.7525424                                                  |
| 0.004940485                                    | 1                                               | 479.2488263                                                  |
| 0.007089422                                    | 1                                               | 412.6517094                                                  |
| 0.011411414                                    | 1                                               | 259.2301184                                                  |
| 0.009149736                                    | 1                                               | 293.7116883                                                  |
| 0.011951538                                    | 1                                               | 250.4781022                                                  |
| 0.013268452                                    | 1                                               | 185.4554455                                                  |
| 0.02034384                                     | 1                                               | 176.2721519                                                  |
| 0.013227719                                    | 1                                               | 185.9766667                                                  |
| 0.006758868                                    | 1                                               | 505.4188406                                                  |
| 0.006038634                                    | 1                                               | 503.6309696                                                  |
| 0.014034512                                    | 1                                               | 302.0243902                                                  |
| 0.006477951                                    | 1                                               | 352.6042945                                                  |
| 0.008740856                                    | 1                                               | 264.9063745                                                  |
| 0.007136016                                    | 1.00483871                                      | 355.4435484                                                  |
| 0.019098945                                    | 1                                               | 166.2882353                                                  |
| 0.009203395                                    | 1                                               | 307.2852459                                                  |
| 0.005952056                                    | 1                                               | 383.9543307                                                  |
| 0.016197148                                    | 1                                               | 155.4290657                                                  |
| 0.013007339                                    | 1                                               | 255.9974684                                                  |
| 0.017022369                                    | 1                                               | 137.2989691                                                  |
| 0.011428836                                    | 1                                               | 223.8523878                                                  |
| 0.00517864                                     | 1                                               | 474.5307018                                                  |
| 0.008224075                                    | 1                                               | 262.0125698                                                  |
| 0.010896258                                    | 1                                               | 225.7842227                                                  |
| 0.004085828                                    | 1                                               | 664.3614776                                                  |
| 0.01119155                                     | 1                                               | 246.8500882                                                  |
| 0.012209314                                    | 1                                               | 373.2857143                                                  |
| 0.031145852                                    | 1                                               | 104.1022727                                                  |
| 0.011390812                                    | 1                                               | 229.6553191                                                  |

| log.sigma.4.5.mm.3D_gldzm_LowIntensityLargeDistanceEmphasis | log.sigma.4.5.mm.3D_gldzm_HighIntensityEmphasis | log.sigma.4.5.mm.3D_gldzm_DistanceZoneVariability | log.sigma.4.5.mm.3D_gldzm_ZonePercentage |
|-------------------------------------------------------------|-------------------------------------------------|---------------------------------------------------|------------------------------------------|
| 0.0060565                                                   | 460.3991655                                     | 717.0027816                                       | 0.338831291                              |
| 0.052946865                                                 | 80.20666667                                     | 150                                               | 0.160427807                              |
| 0.020201758                                                 | 178.381877                                      | 309                                               | 0.201434159                              |
| 0.013711326                                                 | 261.5036232                                     | 276                                               | 0.282497441                              |
| 0.011395289                                                 | 199.9726027                                     | 438                                               | 0.184966216                              |
| 0.022094104                                                 | 144.7988166                                     | 169                                               | 0.256060606                              |
| 0.007652208                                                 | 266.9185484                                     | 1236.006452                                       | 0.219430189                              |
| 0.004196119                                                 | 536.1629328                                     | 982                                               | 0.192247455                              |
| 0.006273485                                                 | 338.1317671                                     | 979                                               | 0.215354158                              |
| 0.006568033                                                 | 526.9562044                                     | 274                                               | 0.255597015                              |
| 0.021748802                                                 | 127.2741935                                     | 310                                               | 0.205570292                              |
| 0.009401421                                                 | 256.5742574                                     | 503.0039604                                       | 0.219088937                              |
| 0.020605522                                                 | 234.1255061                                     | 247                                               | 0.132297804                              |
| 0.009557102                                                 | 344.1085271                                     | 387                                               | 0.225393128                              |
| 0.013547872                                                 | 227.7188119                                     | 505                                               | 0.25453629                               |
| 0.008461628                                                 | 282.889115                                      | 983                                               | 0.224634369                              |
| 0.012194844                                                 | 259.5513308                                     | 263                                               | 0.220268007                              |
| 0.022814804                                                 | 135.5812808                                     | 203                                               | 0.164639092                              |
| 0.052732599                                                 | 71.40101523                                     | 197                                               | 0.151771957                              |
| 0.007696193                                                 | 293.0803213                                     | 1245                                              | 0.239469129                              |
| 0.012629235                                                 | 186.0552885                                     | 416                                               | 0.137566138                              |
| 0.02208722                                                  | 123.0358974                                     | 195                                               | 0.180722892                              |
| 0.021552551                                                 | 139.915                                         | 200                                               | 0.1953125                                |
| 0.014329457                                                 | 186.094162                                      | 531                                               | 0.200604458                              |
| 0.008166828                                                 | 317.754491                                      | 334                                               | 0.262372349                              |
| 0.006241002                                                 | 459.1577381                                     | 672                                               | 0.283663993                              |
| 0.005131361                                                 | 575.5579897                                     | 776                                               | 0.240024745                              |
| 0.011545035                                                 | 246.5380228                                     | 526                                               | 0.190441709                              |
| 0.030273844                                                 | 107.4235294                                     | 85                                                | 0.1901566                                |
| 0.012169854                                                 | 205.7337662                                     | 308                                               | 0.149951315                              |
| 0.005434507                                                 | 380.3289617                                     | 915                                               | 0.192307692                              |
| 0.012943398                                                 | 267.6882129                                     | 263                                               | 0.127114548                              |
| 0.010935575                                                 | 294.3890866                                     | 841.0023725                                       | 0.261071539                              |
| 0.011752246                                                 | 329.4440735                                     | 599                                               | 0.254893617                              |
| 0.005208241                                                 | 364.7518939                                     | 1056                                              | 0.239782016                              |
| 0.006898932                                                 | 335.9649446                                     | 542                                               | 0.180726909                              |
| 0.005814199                                                 | 556.8493151                                     | 584                                               | 0.156947057                              |
| 0.00418301                                                  | 536.0413534                                     | 1064                                              | 0.206161597                              |
| 0.041989291                                                 | 65.90163934                                     | 122                                               | 0.099186992                              |
| 0.010198361                                                 | 280.5842405                                     | 1929                                              | 0.265337001                              |
| 0.007129256                                                 | 376.578629                                      | 496                                               | 0.191210486                              |
| 0.006915622                                                 | 344.8336106                                     | 1202                                              | 0.310835273                              |
| 0.007715402                                                 | 313.0433369                                     | 921.0021668                                       | 0.252669039                              |
| 0.012049783                                                 | 218.9791304                                     | 575                                               | 0.231109325                              |
| 0.023385035                                                 | 143.0187266                                     | 267                                               | 0.208920188                              |
| 0.006486902                                                 | 358.7129121                                     | 728                                               | 0.265209472                              |
| 0.007228812                                                 | 283.0181237                                     | 938                                               | 0.205611574                              |
| 0.046536308                                                 | 70.79831933                                     | 119                                               | 0.136624569                              |
| 0.01727012                                                  | 189.4130435                                     | 184                                               | 0.216216216                              |
| 0.031843305                                                 | 105.9924528                                     | 265                                               | 0.196005917                              |
| 0.010718695                                                 | 263.6949686                                     | 636                                               | 0.247567147                              |
| 0.00803266                                                  | 267.4671385                                     | 989                                               | 0.293384752                              |
| 0.01033679                                                  | 215.3261391                                     | 834                                               | 0.184840426                              |
| 0.012480834                                                 | 198.9094077                                     | 287                                               | 0.259963768                              |
| 0.019180283                                                 | 145.8167702                                     | 322                                               | 0.242105263                              |
| 0.007523622                                                 | 379.6816817                                     | 333                                               | 0.170769231                              |
| 0.007846657                                                 | 301.260177                                      | 1130                                              | 0.279357231                              |
| 0.007558911                                                 | 391.5                                           | 590                                               | 0.170618855                              |
| 0.012088423                                                 | 225.2601881                                     | 319                                               | 0.193567961                              |
| 0.005303915                                                 | 353.5984296                                     | 1779.004487                                       | 0.195311644                              |
| 0.011776055                                                 | 225.0825959                                     | 339                                               | 0.19195923                               |
| 0.009169029                                                 | 261.933913                                      | 575                                               | 0.215355805                              |
| 0.00304642                                                  | 627.2934132                                     | 1497.011976                                       | 0.259630333                              |
| 0.005327554                                                 | 412.5345181                                     | 1459.005468                                       | 0.191919192                              |
| 0.017074251                                                 | 174.6582278                                     | 158                                               | 0.2                                      |
| 0.005570064                                                 | 480.3958665                                     | 629                                               | 0.16286898                               |
| 0.022176807                                                 | 148.9661017                                     | 118                                               | 0.090490798                              |
| 0.005534622                                                 | 442.3535639                                     | 1415.001411                                       | 0.22672                                  |
| 0.005748044                                                 | 348.189899                                      | 1485                                              | 0.253542769                              |
| 0.011795597                                                 | 196.7396313                                     | 434                                               | 0.149758454                              |
| 0.009867832                                                 | 324.7525424                                     | 295                                               | 0.227097768                              |
| 0.004940485                                                 | 479.2488263                                     | 852                                               | 0.198601399                              |
| 0.007089422                                                 | 412.6517094                                     | 468                                               | 0.205353225                              |
| 0.011411414                                                 | 259.2301184                                     | 591                                               | 0.261620186                              |
| 0.009149736                                                 | 293.7116883                                     | 770                                               | 0.245927819                              |
| 0.011951538                                                 | 250.4781022                                     | 274                                               | 0.204172876                              |
| 0.013268452                                                 | 185.4554455                                     | 404                                               | 0.168614357                              |
| 0.02034384                                                  | 176.2721519                                     | 158                                               | 0.164926931                              |
| 0.013227719                                                 | 185.9766667                                     | 300                                               | 0.175746924                              |
| 0.006758868                                                 | 505.4188406                                     | 690                                               | 0.294997862                              |
| 0.006038634                                                 | 503.6309696                                     | 691                                               | 0.347410759                              |
| 0.014034512                                                 | 302.0243902                                     | 328                                               | 0.182323513                              |
| 0.006477951                                                 | 352.6042945                                     | 652                                               | 0.199449373                              |
| 0.008740856                                                 | 264.9063745                                     | 502                                               | 0.163358282                              |
| 0.007148112                                                 | 355.9274194                                     | 618.0032258                                       | 0.254202542                              |
| 0.019098945                                                 | 166.2882353                                     | 170                                               | 0.110966057                              |
| 0.009203395                                                 | 307.2852459                                     | 610                                               | 0.255765199                              |
| 0.005952056                                                 | 383.9543307                                     | 635                                               | 0.231582786                              |
| 0.016197148                                                 | 155.4290657                                     | 289                                               | 0.197404372                              |
| 0.013007339                                                 | 255.9974684                                     | 395                                               | 0.195061728                              |
| 0.017022369                                                 | 137.2989691                                     | 194                                               | 0.148773006                              |
| 0.011428836                                                 | 223.8523878                                     | 691                                               | 0.290092359                              |
| 0.00517864                                                  | 474.5307018                                     | 1140                                              | 0.219949836                              |
| 0.008224075                                                 | 262.0125698                                     | 716                                               | 0.216969697                              |
| 0.010896258                                                 | 225.7842227                                     | 862                                               | 0.198069853                              |
| 0.004085828                                                 | 664.3614776                                     | 758                                               | 0.22150789                               |
| 0.011119155                                                 | 246.8500882                                     | 567                                               | 0.201277955                              |
| 0.012209314                                                 | 373.2857143                                     | 175                                               | 0.167144222                              |
| 0.031145852                                                 | 104.1022727                                     | 88                                                | 0.105515588                              |
| 0.011390812                                                 | 229.6553191                                     | 1175                                              | 0.203498441                              |



| log.sigma.4.5.mm.3D_gldzm_IntensityVariabilityNormalized | log.sigma.4.5.mm.3D_gldzm_LowIntensitySmallDistanceEmphasis | log.sigma.4.5.mm.3D_gldzm_IntensityVariability |
|----------------------------------------------------------|-------------------------------------------------------------|------------------------------------------------|
| 0.045076901                                              | 0.00602989                                                  | 32.41029207                                    |
| 0.077511111                                              | 0.052946865                                                 | 11.62666667                                    |
| 0.059289283                                              | 0.020201758                                                 | 18.32038835                                    |
| 0.049884478                                              | 0.013711326                                                 | 13.76811594                                    |
| 0.064156294                                              | 0.011395289                                                 | 28.10045662                                    |
| 0.068309933                                              | 0.022094104                                                 | 11.5443787                                     |
| 0.057420656                                              | 0.007603059                                                 | 71.2016129                                     |
| 0.047863581                                              | 0.004196119                                                 | 47.00203666                                    |
| 0.055295005                                              | 0.006273485                                                 | 54.13381001                                    |
| 0.060738452                                              | 0.006568033                                                 | 16.64233577                                    |
| 0.071425598                                              | 0.021748802                                                 | 22.14193548                                    |
| 0.058037447                                              | 0.009327164                                                 | 29.30891089                                    |
| 0.049648413                                              | 0.020605522                                                 | 12.26315789                                    |
| 0.046478243                                              | 0.009557102                                                 | 17.9870801                                     |
| 0.053755514                                              | 0.013547872                                                 | 27.14653465                                    |
| 0.054502328                                              | 0.008461628                                                 | 53.5757884                                     |
| 0.062932817                                              | 0.012194844                                                 | 16.5513308                                     |
| 0.066466063                                              | 0.022814804                                                 | 13.49261084                                    |
| 0.087170502                                              | 0.052732599                                                 | 17.17258883                                    |
| 0.050492734                                              | 0.007696193                                                 | 62.86345382                                    |
| 0.070127589                                              | 0.012629235                                                 | 29.17307692                                    |
| 0.074135437                                              | 0.02208722                                                  | 14.45641026                                    |
| 0.06445                                                  | 0.021552551                                                 | 12.89                                          |
| 0.062785279                                              | 0.014329457                                                 | 33.33898305                                    |
| 0.055882247                                              | 0.008166828                                                 | 18.66467066                                    |
| 0.048327664                                              | 0.006241002                                                 | 32.47619048                                    |
| 0.045292406                                              | 0.005131361                                                 | 35.14690722                                    |
| 0.062224407                                              | 0.011545035                                                 | 32.73003802                                    |
| 0.083460208                                              | 0.030273844                                                 | 7.094117647                                    |
| 0.065398887                                              | 0.012169854                                                 | 20.14285714                                    |
| 0.054340231                                              | 0.005434507                                                 | 49.72131148                                    |
| 0.064118319                                              | 0.012943398                                                 | 16.86311787                                    |
| 0.046029756                                              | 0.010844792                                                 | 38.80308422                                    |
| 0.04947868                                               | 0.011752246                                                 | 29.63772955                                    |
| 0.063143868                                              | 0.005208241                                                 | 66.67992424                                    |
| 0.060797102                                              | 0.006898932                                                 | 32.95202952                                    |
| 0.046397073                                              | 0.005814199                                                 | 27.09589041                                    |
| 0.043598776                                              | 0.00418301                                                  | 46.38909774                                    |
| 0.092985757                                              | 0.041989291                                                 | 11.3442623                                     |
| 0.047222001                                              | 0.010198361                                                 | 91.09123898                                    |
| 0.055207791                                              | 0.007129256                                                 | 27.38306452                                    |
| 0.049383861                                              | 0.006915622                                                 | 59.359401                                      |
| 0.053388252                                              | 0.007697345                                                 | 49.27735645                                    |
| 0.059133459                                              | 0.012049783                                                 | 34.00173913                                    |
| 0.066503949                                              | 0.023385035                                                 | 17.75655431                                    |
| 0.052926126                                              | 0.006486902                                                 | 38.53021978                                    |
| 0.057519288                                              | 0.007228812                                                 | 53.95309168                                    |
| 0.089188617                                              | 0.046536308                                                 | 10.61344538                                    |
| 0.060077977                                              | 0.01727012                                                  | 11.05434783                                    |
| 0.081238875                                              | 0.031843305                                                 | 21.52830189                                    |
| 0.054551837                                              | 0.010718695                                                 | 34.69496855                                    |
| 0.053524053                                              | 0.00803266                                                  | 52.93528817                                    |
| 0.0569645                                                | 0.01033679                                                  | 47.50839329                                    |
| 0.062098605                                              | 0.012480834                                                 | 17.82229965                                    |
| 0.062547446                                              | 0.019180283                                                 | 20.14906832                                    |
| 0.060952845                                              | 0.007523622                                                 | 20.2972973                                     |
| 0.051925758                                              | 0.007846657                                                 | 58.67610619                                    |
| 0.047296754                                              | 0.007558911                                                 | 27.90508475                                    |
| 0.066125529                                              | 0.012088423                                                 | 21.09404389                                    |
| 0.055017963                                              | 0.005288788                                                 | 98.09702748                                    |
| 0.055298857                                              | 0.011776055                                                 | 18.74631268                                    |
| 0.060464272                                              | 0.009169029                                                 | 34.76695652                                    |
| 0.053390226                                              | 0.003030362                                                 | 80.24550898                                    |
| 0.052010191                                              | 0.00530615                                                  | 76.09090909                                    |
| 0.066095177                                              | 0.017074251                                                 | 10.44303797                                    |
| 0.047919705                                              | 0.005570064                                                 | 30.14149444                                    |
| 0.08302212                                               | 0.022176807                                                 | 9.796610169                                    |
| 0.0465459                                                | 0.005530992                                                 | 65.95553987                                    |
| 0.050922241                                              | 0.005748044                                                 | 75.61952862                                    |
| 0.06944297                                               | 0.011795597                                                 | 30.13824885                                    |
| 0.06102844                                               | 0.009867832                                                 | 18.00338983                                    |
| 0.049323327                                              | 0.004940485                                                 | 42.02347418                                    |
| 0.05249653                                               | 0.007089422                                                 | 24.56837607                                    |
| 0.052688237                                              | 0.011411414                                                 | 31.13874788                                    |
| 0.051303761                                              | 0.009149736                                                 | 39.5038961                                     |
| 0.063588897                                              | 0.011951538                                                 | 17.42335766                                    |
| 0.06615773                                               | 0.013268452                                                 | 26.72727277                                    |
| 0.058564333                                              | 0.02034384                                                  | 9.253164557                                    |
| 0.068888889                                              | 0.013227719                                                 | 20.66666667                                    |
| 0.044780508                                              | 0.006758868                                                 | 30.89855072                                    |
| 0.044812254                                              | 0.006038634                                                 | 30.96526773                                    |
| 0.052907496                                              | 0.014034512                                                 | 17.35365854                                    |
| 0.051766156                                              | 0.006477951                                                 | 33.75153374                                    |
| 0.061768861                                              | 0.008740856                                                 | 31.00796813                                    |
| 0.047455775                                              | 0.007132991                                                 | 29.42258065                                    |
| 0.071487889                                              | 0.019098945                                                 | 12.15294118                                    |
| 0.050432679                                              | 0.009203395                                                 | 30.76393443                                    |
| 0.057389795                                              | 0.005952056                                                 | 36.44251969                                    |
| 0.073670095                                              | 0.016197148                                                 | 21.29065744                                    |
| 0.052318539                                              | 0.013007339                                                 | 20.66582278                                    |
| 0.083005633                                              | 0.017022369                                                 | 16.10309278                                    |
| 0.055736249                                              | 0.011428836                                                 | 38.51374819                                    |
| 0.053214835                                              | 0.00517864                                                  | 60.66491228                                    |
| 0.057765831                                              | 0.008224075                                                 | 41.3603352                                     |
| 0.06076087                                               | 0.010896258                                                 | 52.37587007                                    |
| 0.04747948                                               | 0.004085828                                                 | 35.98944591                                    |
| 0.052819848                                              | 0.011119155                                                 | 29.94885362                                    |
| 0.05835102                                               | 0.012209314                                                 | 10.21142857                                    |
| 0.080836777                                              | 0.031145852                                                 | 7.113636364                                    |
| 0.059463649                                              | 0.011390812                                                 | 69.86978723                                    |

| log.sigma.4.5.mm.3D_gldzm_HighIntensityLargeDistanceEmphasis | log.sigma.4.5.mm.3D_gldzm_SmallDistanceEmphasis | log.sigma.4.5.mm.3D_gldzm_SumVariance | log.sigma.4.5.mm.3D_gldzm_Homogeneity1 |
|--------------------------------------------------------------|-------------------------------------------------|---------------------------------------|----------------------------------------|
| 461.216968                                                   | 0.998956885                                     | 1577.783538                           | 0.382730757                            |
| 80.20666667                                                  | 1                                               | 154.0987514                           | 0.502324902                            |
| 178.381877                                                   | 1                                               | 519.6755945                           | 0.460840607                            |
| 261.5036232                                                  | 1                                               | 807.8570785                           | 0.41829015                             |
| 199.9726027                                                  | 1                                               | 563.2300794                           | 0.46702912                             |
| 144.7988166                                                  | 1                                               | 267.917332                            | 0.467113311                            |
| 267.733871                                                   | 0.998790323                                     | 719.0985835                           | 0.43548229                             |
| 536.1629328                                                  | 1                                               | 1616.715895                           | 0.462255485                            |
| 338.1317671                                                  | 1                                               | 1094.738836                           | 0.440901235                            |
| 526.9562044                                                  | 1                                               | 1724.407912                           | 0.427447823                            |
| 127.2741935                                                  | 1                                               | 356.5520159                           | 0.477189695                            |
| 257.1683168                                                  | 0.998514851                                     | 765.3353765                           | 0.450197785                            |
| 234.1255061                                                  | 1                                               | 656.6046751                           | 0.518842113                            |
| 344.1085271                                                  | 1                                               | 1070.293086                           | 0.451579748                            |
| 227.7188119                                                  | 1                                               | 717.1199535                           | 0.426406157                            |
| 282.889115                                                   | 1                                               | 831.4498844                           | 0.406714126                            |
| 259.5513308                                                  | 1                                               | 861.3636125                           | 0.441515961                            |
| 135.5812808                                                  | 1                                               | 291.0445937                           | 0.505650842                            |
| 71.40101523                                                  | 1                                               | 163.490657                            | 0.512538785                            |
| 293.0803213                                                  | 1                                               | 784.5280334                           | 0.425612721                            |
| 186.0552885                                                  | 1                                               | 457.7567168                           | 0.517975879                            |
| 123.0358974                                                  | 1                                               | 308.6904783                           | 0.468299254                            |
| 139.915                                                      | 1                                               | 338.4807222                           | 0.483360253                            |
| 186.094162                                                   | 1                                               | 554.5991838                           | 0.478445328                            |
| 317.754491                                                   | 1                                               | 1087.090534                           | 0.407299665                            |
| 459.1577381                                                  | 1                                               | 1402.749776                           | 0.416754839                            |
| 575.5579897                                                  | 1                                               | 1879.488802                           | 0.421680625                            |
| 246.5380228                                                  | 1                                               | 688.1365511                           | 0.470424884                            |
| 107.4235294                                                  | 1                                               | 198.6732224                           | 0.496420261                            |
| 205.7337662                                                  | 1                                               | 566.4371903                           | 0.512423875                            |
| 380.3289617                                                  | 1                                               | 1196.423864                           | 0.454671558                            |
| 267.6882129                                                  | 1                                               | 1050.681577                           | 0.516608884                            |
| 294.5634638                                                  | 0.99911032                                      | 970.0268379                           | 0.413198637                            |
| 329.4440735                                                  | 1                                               | 1098.144861                           | 0.410393853                            |
| 364.7518939                                                  | 1                                               | 1147.734098                           | 0.436042674                            |
| 335.9649446                                                  | 1                                               | 1083.005066                           | 0.46894906                             |
| 556.8493151                                                  | 1                                               | 1910.127992                           | 0.492669515                            |
| 536.0413534                                                  | 1                                               | 1668.093235                           | 0.4476411                              |
| 65.90163934                                                  | 1                                               | 181.9514187                           | 0.538929723                            |
| 280.5842405                                                  | 1                                               | 776.9443652                           | 0.407196587                            |
| 376.578629                                                   | 1                                               | 1365.730957                           | 0.465607674                            |
| 344.8336106                                                  | 1                                               | 952.3379311                           | 0.390308384                            |
| 313.7746479                                                  | 0.999187432                                     | 1004.082071                           | 0.405021171                            |
| 218.9791304                                                  | 1                                               | 654.6603056                           | 0.442283525                            |
| 143.0187266                                                  | 1                                               | 294.9389442                           | 0.47249018                             |
| 358.7129121                                                  | 1                                               | 1170.802567                           | 0.432009236                            |
| 283.0181237                                                  | 1                                               | 808.7403129                           | 0.458973502                            |
| 70.79831933                                                  | 1                                               | 131.9631163                           | 0.524819624                            |
| 189.4130435                                                  | 1                                               | 427.7924706                           | 0.473058121                            |
| 105.9924528                                                  | 1                                               | 221.406164                            | 0.496769522                            |
| 263.6949686                                                  | 1                                               | 830.9512231                           | 0.419640922                            |
| 267.4671385                                                  | 1                                               | 772.8132604                           | 0.393736557                            |
| 215.3261391                                                  | 1                                               | 599.4859454                           | 0.470368235                            |
| 198.9094077                                                  | 1                                               | 576.8894303                           | 0.420027581                            |
| 145.8167702                                                  | 1                                               | 371.4940889                           | 0.44166231                             |
| 379.6816817                                                  | 1                                               | 1162.473654                           | 0.466124959                            |
| 301.260177                                                   | 1                                               | 934.0569413                           | 0.407772292                            |
| 391.5                                                        | 1                                               | 1438.589994                           | 0.458741228                            |
| 225.2601881                                                  | 1                                               | 769.7744207                           | 0.483521438                            |
| 355.2019069                                                  | 0.999158721                                     | 1088.689864                           | 0.464361195                            |
| 225.0825959                                                  | 1                                               | 528.0960975                           | 0.491604563                            |
| 261.933913                                                   | 1                                               | 734.2422082                           | 0.447621565                            |
| 630.2275449                                                  | 0.998502994                                     | 2071.59846                            | 0.42370724                             |
| 413.5208476                                                  | 0.99897471                                      | 1032.954505                           | 0.458235947                            |
| 174.6582278                                                  | 1                                               | 448.5772298                           | 0.459304591                            |
| 480.3958665                                                  | 1                                               | 1433.361269                           | 0.486358029                            |
| 148.9661017                                                  | 1                                               | 446.7120603                           | 0.575537017                            |
| 443.8969654                                                  | 0.999470713                                     | 1310.243798                           | 0.437582086                            |
| 348.189899                                                   | 1                                               | 1291.58082                            | 0.453734028                            |
| 196.7396313                                                  | 1                                               | 549.5401611                           | 0.511365622                            |
| 324.7525424                                                  | 1                                               | 1045.652361                           | 0.456604425                            |
| 479.2488263                                                  | 1                                               | 1434.52169                            | 0.454233376                            |
| 412.6517094                                                  | 1                                               | 1416.218661                           | 0.448664386                            |
| 259.2301184                                                  | 1                                               | 824.0115205                           | 0.412688535                            |
| 293.7116883                                                  | 1                                               | 744.7292998                           | 0.424446235                            |
| 250.4781022                                                  | 1                                               | 848.6967538                           | 0.469943804                            |
| 185.4554455                                                  | 1                                               | 573.2159161                           | 0.507696749                            |
| 176.2721519                                                  | 1                                               | 315.9114366                           | 0.513155759                            |
| 185.9766667                                                  | 1                                               | 471.4278186                           | 0.484382541                            |
| 505.4188406                                                  | 1                                               | 1773.107046                           | 0.393695307                            |
| 503.6309696                                                  | 1                                               | 1727.447258                           | 0.386070261                            |
| 302.0243902                                                  | 1                                               | 937.1963281                           | 0.492079787                            |
| 352.6042945                                                  | 1                                               | 1177.164585                           | 0.449775913                            |
| 264.9063745                                                  | 1                                               | 883.3218272                           | 0.475105208                            |
| 357.8629032                                                  | 0.998790323                                     | 1095.281319                           | 0.417920603                            |
| 166.2882353                                                  | 1                                               | 384.9180228                           | 0.536734616                            |
| 307.2852459                                                  | 1                                               | 1047.054428                           | 0.421948084                            |
| 383.9543307                                                  | 1                                               | 1145.475039                           | 0.447562038                            |
| 155.4290657                                                  | 1                                               | 398.5012851                           | 0.471103804                            |
| 255.9974684                                                  | 1                                               | 746.0842875                           | 0.474191214                            |
| 137.2989691                                                  | 1                                               | 274.5819148                           | 0.5431942                              |
| 223.8523878                                                  | 1                                               | 669.881342                            | 0.415542907                            |
| 474.5307018                                                  | 1                                               | 1573.750777                           | 0.448507427                            |
| 262.0125698                                                  | 1                                               | 802.6677264                           | 0.445131308                            |
| 225.7842227                                                  | 1                                               | 665.4623077                           | 0.455208593                            |
| 664.3614776                                                  | 1                                               | 2202.150255                           | 0.456475822                            |
| 246.8500882                                                  | 1                                               | 675.4049115                           | 0.456206932                            |
| 373.2857143                                                  | 1                                               | 1329.054491                           | 0.507158404                            |
| 104.1022727                                                  | 1                                               | 287.857832                            | 0.534822623                            |
| 229.6553191                                                  | 1                                               | 627.0562275                           | 0.451810041                            |

| log.sigma.4.5.mm.3D_glc_m_Homogeneity2 | log.sigma.4.5.mm.3D_glc_m_ClusterShade | log.sigma.4.5.mm.3D_glc_m_MaximumProbability | log.sigma.4.5.mm.3D_glc_m_Ldmn | log.sigma.4.5.mm.3D_glc_m_SumVariance2 |
|----------------------------------------|----------------------------------------|----------------------------------------------|--------------------------------|----------------------------------------|
| 0.300500107                            | -549.4173158                           | 0.022947019                                  | 0.986898659                    | 108.9788324                            |
| 0.443228288                            | 120.0483289                            | 0.057506494                                  | 0.982037663                    | 35.79359165                            |
| 0.391806072                            | 138.2921898                            | 0.021518883                                  | 0.987815908                    | 68.39308313                            |
| 0.340592799                            | -423.4958804                           | 0.027334062                                  | 0.984117213                    | 97.9232721                             |
| 0.398864711                            | 56.21386969                            | 0.035310533                                  | 0.988409574                    | 48.04989481                            |
| 0.399830619                            | 223.5013122                            | 0.067298491                                  | 0.9835866                      | 61.18039142                            |
| 0.359567088                            | 166.2448775                            | 0.01954243                                   | 0.992020988                    | 68.45938374                            |
| 0.393456758                            | 167.8714655                            | 0.028391156                                  | 0.993506728                    | 68.83725797                            |
| 0.368185023                            | -2.395411434                           | 0.020964838                                  | 0.990227735                    | 70.5077679                             |
| 0.349613644                            | -270.3238051                           | 0.022934667                                  | 0.990755975                    | 65.25692556                            |
| 0.410024314                            | 0.31439474                             | 0.026274356                                  | 0.987461723                    | 44.12143379                            |
| 0.377842761                            | -22.96840857                           | 0.025200195                                  | 0.990818685                    | 67.7511302                             |
| 0.463219185                            | 217.7905441                            | 0.060318682                                  | 0.991392776                    | 60.81705092                            |
| 0.381804424                            | -53.13326318                           | 0.039039776                                  | 0.989676403                    | 69.31663565                            |
| 0.349181669                            | 32.23124656                            | 0.029682681                                  | 0.988384982                    | 67.84125762                            |
| 0.324058331                            | -202.7673223                           | 0.019492718                                  | 0.988062529                    | 78.56270699                            |
| 0.366493538                            | -386.3457508                           | 0.02659728                                   | 0.986019149                    | 51.62256548                            |
| 0.447659136                            | 263.754059                             | 0.067059753                                  | 0.983996007                    | 48.24670818                            |
| 0.453406095                            | 83.7552671                             | 0.061219125                                  | 0.982264592                    | 34.90438726                            |
| 0.34757638                             | 41.50669379                            | 0.019351495                                  | 0.991186065                    | 79.5763991                             |
| 0.461398819                            | 64.07149717                            | 0.046125978                                  | 0.991384264                    | 39.79443066                            |
| 0.398408735                            | 21.78602792                            | 0.027640076                                  | 0.985297433                    | 43.45976881                            |
| 0.418512633                            | 142.9181123                            | 0.042371955                                  | 0.987236274                    | 55.94594227                            |
| 0.412525712                            | 141.973928                             | 0.035365307                                  | 0.990754652                    | 45.97611675                            |
| 0.326017063                            | -26.47111823                           | 0.024533197                                  | 0.9867773                      | 48.37057293                            |
| 0.338524661                            | -372.166265                            | 0.026459794                                  | 0.990994056                    | 76.07824606                            |
| 0.345701957                            | -760.9633326                           | 0.023022137                                  | 0.992552402                    | 96.50616013                            |
| 0.402467888                            | 69.03576522                            | 0.037509734                                  | 0.989694101                    | 50.52785211                            |
| 0.434397315                            | 154.6132133                            | 0.060913989                                  | 0.981835678                    | 41.91886196                            |
| 0.45419498                             | 53.24438474                            | 0.045746434                                  | 0.991510958                    | 37.89372224                            |
| 0.384729574                            | 11.0076546                             | 0.025595373                                  | 0.991778374                    | 59.88408343                            |
| 0.46145564                             | -328.9691484                           | 0.055137746                                  | 0.990937646                    | 34.65741755                            |
| 0.334327725                            | -425.5351756                           | 0.017783484                                  | 0.989901018                    | 98.51436089                            |
| 0.329835112                            | -362.0267412                           | 0.021878012                                  | 0.989488886                    | 76.9180242                             |
| 0.359363408                            | -112.1817594                           | 0.020790474                                  | 0.990434656                    | 58.86332603                            |
| 0.400884388                            | -122.9919516                           | 0.028379406                                  | 0.990548636                    | 49.79718915                            |
| 0.432573753                            | -449.4167108                           | 0.054562063                                  | 0.993710177                    | 60.793648                              |
| 0.37522654                             | -256.4833381                           | 0.048971178                                  | 0.992586294                    | 115.025909                             |
| 0.487262719                            | -8.232457407                           | 0.046642902                                  | 0.986424518                    | 15.26414475                            |
| 0.326274397                            | 15.10142805                            | 0.01323341                                   | 0.988821627                    | 102.2202491                            |
| 0.39970856                             | -506.8420082                           | 0.045314669                                  | 0.990938109                    | 54.95834685                            |
| 0.305892675                            | 366.59747                              | 0.017302508                                  | 0.991780221                    | 95.01211994                            |
| 0.324201148                            | 70.4775688                             | 0.017883915                                  | 0.987277896                    | 69.55534857                            |
| 0.368424414                            | -93.97065789                           | 0.028312691                                  | 0.991964979                    | 51.84355059                            |
| 0.405379121                            | 292.213059                             | 0.036750089                                  | 0.987842269                    | 54.13701777                            |
| 0.358576383                            | -297.4155389                           | 0.020794086                                  | 0.990325081                    | 71.53572956                            |
| 0.388365158                            | 82.13881044                            | 0.025632038                                  | 0.99115646                     | 52.60249213                            |
| 0.469129764                            | 91.52099554                            | 0.056702006                                  | 0.982239395                    | 33.25108227                            |
| 0.404389529                            | 254.4658368                            | 0.032686866                                  | 0.988487301                    | 63.39393994                            |
| 0.434010122                            | 134.3134142                            | 0.053708411                                  | 0.988109429                    | 41.25278035                            |
| 0.340098174                            | -89.73799065                           | 0.016673231                                  | 0.987480238                    | 72.74695093                            |
| 0.310121847                            | 81.4289726                             | 0.016879193                                  | 0.987439951                    | 77.26304422                            |
| 0.40221072                             | 124.2994258                            | 0.029918616                                  | 0.990831197                    | 56.01445782                            |
| 0.341505205                            | 46.16172853                            | 0.02333901                                   | 0.981945284                    | 46.18613882                            |
| 0.368245073                            | 125.2632429                            | 0.027417743                                  | 0.983777261                    | 66.51178597                            |
| 0.396827411                            | -19.32028629                           | 0.038452505                                  | 0.992997423                    | 43.33678944                            |
| 0.326545158                            | -142.9340815                           | 0.015747311                                  | 0.988754256                    | 74.32128284                            |
| 0.389329445                            | -564.989865                            | 0.031203184                                  | 0.991653426                    | 68.25551512                            |
| 0.419517213                            | -29.20729309                           | 0.040240189                                  | 0.988852668                    | 29.79092152                            |
| 0.394930593                            | 65.53951747                            | 0.033992449                                  | 0.992266333                    | 65.74236499                            |
| 0.430179821                            | 363.1255622                            | 0.025553073                                  | 0.991365975                    | 55.09606517                            |
| 0.374935425                            | -18.1177808                            | 0.025266352                                  | 0.990089922                    | 68.0882111                             |
| 0.346915996                            | -198.7781443                           | 0.020655816                                  | 0.993595124                    | 75.10000688                            |
| 0.388652746                            | 362.4787212                            | 0.026680135                                  | 0.993034585                    | 70.83610257                            |
| 0.38562118                             | 63.18891665                            | 0.030581369                                  | 0.986724087                    | 35.61717401                            |
| 0.422724863                            | 50.95543868                            | 0.046314928                                  | 0.99424084                     | 65.7922515                             |
| 0.532713854                            | 14.84842017                            | 0.085131672                                  | 0.99180017                     | 22.86382722                            |
| 0.363643094                            | -25.21165544                           | 0.029495627                                  | 0.992804193                    | 76.19896278                            |
| 0.382556513                            | -208.0000255                           | 0.025687995                                  | 0.992543154                    | 56.42936691                            |
| 0.452981197                            | 35.82426154                            | 0.038053366                                  | 0.990187069                    | 37.81939989                            |
| 0.387630173                            | -357.4441867                           | 0.03610227                                   | 0.990051534                    | 57.75605901                            |
| 0.384315496                            | 139.5095628                            | 0.028398596                                  | 0.992493438                    | 74.68064434                            |
| 0.375915098                            | -347.6950413                           | 0.03051405                                   | 0.991016554                    | 57.31981785                            |
| 0.333672243                            | 215.4451799                            | 0.022019582                                  | 0.985009556                    | 66.90321656                            |
| 0.346930868                            | -260.4311014                           | 0.02854017                                   | 0.989494142                    | 93.43649033                            |
| 0.402960175                            | -237.4759145                           | 0.036643391                                  | 0.988579816                    | 45.7538397                             |
| 0.448953514                            | -11.37552492                           | 0.033018244                                  | 0.990605372                    | 32.21945284                            |
| 0.454410417                            | 377.5226389                            | 0.06095189                                   | 0.990849103                    | 58.64117236                            |
| 0.418149009                            | 51.14883258                            | 0.040831674                                  | 0.989415913                    | 44.13440452                            |
| 0.312130609                            | -1519.145769                           | 0.02005251                                   | 0.990221663                    | 127.4210522                            |
| 0.304698466                            | -817.0391479                           | 0.023788137                                  | 0.987498873                    | 119.7697375                            |
| 0.430432267                            | -199.521842                            | 0.046278652                                  | 0.993537645                    | 41.65459756                            |
| 0.37755317                             | -76.19440434                           | 0.028258205                                  | 0.991337202                    | 64.34972688                            |
| 0.408233083                            | -326.3053684                           | 0.028465358                                  | 0.992232494                    | 55.15702495                            |
| 0.339304799                            | -244.7773402                           | 0.020122673                                  | 0.991374674                    | 95.28522592                            |
| 0.484801635                            | 179.7801324                            | 0.055272953                                  | 0.99165781                     | 44.98986905                            |
| 0.34658654                             | -534.2970326                           | 0.025057023                                  | 0.986643977                    | 83.19821259                            |
| 0.376039021                            | 51.21530758                            | 0.033020384                                  | 0.991289967                    | 56.83304343                            |
| 0.401851736                            | 51.28335042                            | 0.036463866                                  | 0.987714738                    | 49.37732198                            |
| 0.407506019                            | -51.31386739                           | 0.033435896                                  | 0.990720043                    | 57.57040944                            |
| 0.493607732                            | 218.4335184                            | 0.088508693                                  | 0.985004407                    | 54.48461283                            |
| 0.336663886                            | 97.56384692                            | 0.020134501                                  | 0.986766738                    | 84.89279889                            |
| 0.376667489                            | -277.8256793                           | 0.026220308                                  | 0.992707205                    | 58.92528459                            |
| 0.371965956                            | -25.28074629                           | 0.02945079                                   | 0.989447258                    | 51.60096316                            |
| 0.383229314                            | -54.57019952                           | 0.023846557                                  | 0.991370301                    | 50.66578391                            |
| 0.387850807                            | -197.9215383                           | 0.042994554                                  | 0.993159665                    | 93.341553                              |
| 0.384285229                            | -69.49028511                           | 0.028700737                                  | 0.991614704                    | 85.07313936                            |
| 0.451573004                            | -1111.987055                           | 0.061667681                                  | 0.989169953                    | 71.42465122                            |
| 0.481977578                            | -13.89554633                           | 0.041447548                                  | 0.987446221                    | 27.05729483                            |
| 0.380633807                            | 135.8551643                            | 0.026481341                                  | 0.987623956                    | 53.41944044                            |

| log.sigma.4.5.mm.3D_glc_m_Contrast | log.sigma.4.5.mm.3D_glc_m_DifferenceEntropy | log.sigma.4.5.mm.3D_glc_m_InverseVariance | log.sigma.4.5.mm.3D_glc_m_Entropy | log.sigma.4.5.mm.3D_glc_m_Dissimilarity |
|------------------------------------|---------------------------------------------|-------------------------------------------|-----------------------------------|-----------------------------------------|
| 17.88676923                        | 3.161340098                                 | 0.296661031                               | 8.11872222                        | 3.129639637                             |
| 5.688599537                        | 2.373022958                                 | 0.427346433                               | 6.337888183                       | 1.717536213                             |
| 8.026924374                        | 2.624511083                                 | 0.385000215                               | 7.310570507                       | 2.078521296                             |
| 12.36930758                        | 2.911149008                                 | 0.331640972                               | 7.612702832                       | 2.593807536                             |
| 7.68973984                         | 2.600514776                                 | 0.391154358                               | 7.092938169                       | 2.011665448                             |
| 9.361299065                        | 2.680066479                                 | 0.365443997                               | 6.834701468                       | 2.182226762                             |
| 9.543049065                        | 2.757619145                                 | 0.353799713                               | 7.572860127                       | 2.301268787                             |
| 8.704799095                        | 2.689508728                                 | 0.379241378                               | 7.364902395                       | 2.117707799                             |
| 10.47963071                        | 2.786171768                                 | 0.361976203                               | 7.613450247                       | 2.339696508                             |
| 10.48707289                        | 2.792302444                                 | 0.34159761                                | 7.260016575                       | 2.403902613                             |
| 6.376188775                        | 2.484490009                                 | 0.394059869                               | 6.914213065                       | 1.885269782                             |
| 8.011754211                        | 2.657874641                                 | 0.37668802                                | 7.376103883                       | 2.120082149                             |
| 6.638145169                        | 2.464566311                                 | 0.41017393                                | 6.703294885                       | 1.749826283                             |
| 10.42135894                        | 2.803311145                                 | 0.362923121                               | 7.341562983                       | 2.308816595                             |
| 10.95489696                        | 2.850028545                                 | 0.337950055                               | 7.483172104                       | 2.458464724                             |
| 11.2194587                         | 2.818257426                                 | 0.322481521                               | 7.702692154                       | 2.5630853                               |
| 9.284973947                        | 2.720742074                                 | 0.354942569                               | 7.04760265                        | 2.256137382                             |
| 7.045093707                        | 2.497886564                                 | 0.409054858                               | 6.558841841                       | 1.828224958                             |
| 4.876558894                        | 2.311673344                                 | 0.417322891                               | 6.390288977                       | 1.629886218                             |
| 9.94332782                         | 2.792563264                                 | 0.346830946                               | 7.735279479                       | 2.375625995                             |
| 5.180037642                        | 2.359481809                                 | 0.424335404                               | 6.629788012                       | 1.630949947                             |
| 6.246284225                        | 2.464414263                                 | 0.394801303                               | 6.82696349                        | 1.892006548                             |
| 5.943252793                        | 2.442186595                                 | 0.410821294                               | 6.861270554                       | 1.812703667                             |
| 7.583694194                        | 2.600940085                                 | 0.385678143                               | 7.030253174                       | 1.979336069                             |
| 12.58948766                        | 2.891876422                                 | 0.32129882                                | 7.319774645                       | 2.647380453                             |
| 12.13540567                        | 2.905247822                                 | 0.335716893                               | 7.609056034                       | 2.571803098                             |
| 13.01059063                        | 2.926384174                                 | 0.344116007                               | 7.752508147                       | 2.58654644                              |
| 7.274267071                        | 2.597958711                                 | 0.384721181                               | 7.075321218                       | 1.991070722                             |
| 5.615925281                        | 2.395673679                                 | 0.407988608                               | 6.283684395                       | 1.760370613                             |
| 5.097267361                        | 2.357171143                                 | 0.423637472                               | 6.629118162                       | 1.639636597                             |
| 9.312464889                        | 2.724328383                                 | 0.373222816                               | 7.386998157                       | 2.2008824                               |
| 7.019737282                        | 2.48743129                                  | 0.414887321                               | 6.334724011                       | 1.780224146                             |
| 12.16185179                        | 2.905923382                                 | 0.335545657                               | 7.889468533                       | 2.590793948                             |
| 11.9093549                         | 2.89480482                                  | 0.324363038                               | 7.634140968                       | 2.601541585                             |
| 8.945218451                        | 2.725541025                                 | 0.352503411                               | 7.417377458                       | 2.258391999                             |
| 7.773975316                        | 2.60222228                                  | 0.385259404                               | 7.066068668                       | 2.020016004                             |
| 9.576494928                        | 2.638117829                                 | 0.395595914                               | 6.933219714                       | 2.030641998                             |
| 12.30912009                        | 2.896196636                                 | 0.326509893                               | 7.896166632                       | 2.477491357                             |
| 3.195163155                        | 2.070728751                                 | 0.461508807                               | 5.761528108                       | 1.362587908                             |
| 11.9709567                         | 2.911656083                                 | 0.33079091                                | 8.084788982                       | 2.601571425                             |
| 10.36638516                        | 2.768423226                                 | 0.37519319                                | 7.111219144                       | 2.23510031                              |
| 13.60070719                        | 2.983373896                                 | 0.312344871                               | 7.997949824                       | 2.790519403                             |
| 12.8595835                         | 2.933216268                                 | 0.324204284                               | 7.75461145                        | 2.680820294                             |
| 9.630554997                        | 2.766406232                                 | 0.357992063                               | 7.306266249                       | 2.279864403                             |
| 6.80336544                         | 2.529028342                                 | 0.399580468                               | 6.867291816                       | 1.925050782                             |
| 11.68208231                        | 2.858675639                                 | 0.355505778                               | 7.601419148                       | 2.469327584                             |
| 8.309743397                        | 2.664493188                                 | 0.371736433                               | 7.253841516                       | 2.111497578                             |
| 4.294619196                        | 2.22237062                                  | 0.433004482                               | 6.162016382                       | 1.528291467                             |
| 6.943644135                        | 2.55040976                                  | 0.380749918                               | 7.018471039                       | 1.953218742                             |
| 6.075655591                        | 2.43229363                                  | 0.398285956                               | 6.599449455                       | 1.792619583                             |
| 10.30757395                        | 2.81108299                                  | 0.340117391                               | 7.651461169                       | 2.429140703                             |
| 13.49475148                        | 2.993029359                                 | 0.31145699                                | 7.905593776                       | 2.779921287                             |
| 6.957913135                        | 2.561549722                                 | 0.391822331                               | 7.20394175                        | 1.951821498                             |
| 11.2501561                         | 2.82906548                                  | 0.339393788                               | 7.226644668                       | 2.488946285                             |
| 10.04189256                        | 2.765212937                                 | 0.356555719                               | 7.350968447                       | 2.316596047                             |
| 6.941313956                        | 2.546664794                                 | 0.39095921                                | 6.933775884                       | 1.96352315                              |
| 11.2439661                         | 2.868147962                                 | 0.329769882                               | 7.770427563                       | 2.563385838                             |
| 8.95943653                         | 2.672574415                                 | 0.382196395                               | 7.24328198                        | 2.134218188                             |
| 7.412081125                        | 2.571491745                                 | 0.399045249                               | 6.690254618                       | 1.928918998                             |
| 9.252422814                        | 2.756435759                                 | 0.352791554                               | 7.516681032                       | 2.193943184                             |
| 7.658499385                        | 2.571497659                                 | 0.401488097                               | 6.883632201                       | 1.91993084                              |
| 8.679331404                        | 2.70263348                                  | 0.367990096                               | 7.416853424                       | 2.18954183                              |
| 11.63539454                        | 2.884348707                                 | 0.343867213                               | 7.73281602                        | 2.498306419                             |
| 8.819539564                        | 2.690401769                                 | 0.375748725                               | 7.401466768                       | 2.150610062                             |
| 7.426621295                        | 2.539363476                                 | 0.360153166                               | 6.696857079                       | 2.04434365                              |
| 7.070704067                        | 2.602180692                                 | 0.389665613                               | 7.155359988                       | 1.955367258                             |
| 3.804483787                        | 2.153228062                                 | 0.446078814                               | 5.914566482                       | 1.3257819                               |
| 10.75299011                        | 2.829121255                                 | 0.354176824                               | 7.654788257                       | 2.376189039                             |
| 8.917938477                        | 2.717919468                                 | 0.368677428                               | 7.352099216                       | 2.179899986                             |
| 5.467594396                        | 2.386684226                                 | 0.418806435                               | 6.657054104                       | 1.67584321                              |
| 9.445962481                        | 2.687193356                                 | 0.380224706                               | 7.007057481                       | 2.187906075                             |
| 9.58657369                         | 2.725089279                                 | 0.377130445                               | 7.504309999                       | 2.202676277                             |
| 9.010701971                        | 2.705414055                                 | 0.366886101                               | 7.167340503                       | 2.196683951                             |
| 12.50499126                        | 2.931436216                                 | 0.329251982                               | 7.653973493                       | 2.624113422                             |
| 11.25324904                        | 2.861071612                                 | 0.336373734                               | 7.816037457                       | 2.484305193                             |
| 8.136905544                        | 2.629688338                                 | 0.384075492                               | 6.925571227                       | 2.055943809                             |
| 6.214850778                        | 2.448505975                                 | 0.412820717                               | 6.63282353                        | 1.748405387                             |
| 5.483021492                        | 2.40144347                                  | 0.405995006                               | 6.585129912                       | 1.694373224                             |
| 5.866001221                        | 2.450190992                                 | 0.399971604                               | 6.845627226                       | 1.805436984                             |
| 15.52878265                        | 3.045640252                                 | 0.315671811                               | 7.962732634                       | 2.893785393                             |
| 18.03088251                        | 3.159937575                                 | 0.299972017                               | 8.117119904                       | 3.114301277                             |
| 7.294149009                        | 2.564051808                                 | 0.400384187                               | 6.732569531                       | 1.899734421                             |
| 9.273967946                        | 2.693234485                                 | 0.369485903                               | 7.356220037                       | 2.201913927                             |
| 6.297894943                        | 2.474443847                                 | 0.404965157                               | 7.036811268                       | 1.871009584                             |
| 11.5808298                         | 2.873381894                                 | 0.335198652                               | 7.839228438                       | 2.532732276                             |
| 4.230270237                        | 2.229345328                                 | 0.443916445                               | 6.361907011                       | 1.474019713                             |
| 12.73774282                        | 2.929857701                                 | 0.342821995                               | 7.688191925                       | 2.594703556                             |
| 9.901924699                        | 2.771748181                                 | 0.365885054                               | 7.343849392                       | 2.272230896                             |
| 6.830359351                        | 2.546870497                                 | 0.380174937                               | 6.953055641                       | 1.953001754                             |
| 7.615381268                        | 2.600468987                                 | 0.386520489                               | 7.129384601                       | 1.995737202                             |
| 5.897050169                        | 2.353380716                                 | 0.415183372                               | 6.062067322                       | 1.632360392                             |
| 11.71892278                        | 2.902120871                                 | 0.332194632                               | 7.793959904                       | 2.562130756                             |
| 9.241791606                        | 2.735067195                                 | 0.36855476                                | 7.354086843                       | 2.221965947                             |
| 9.29727791                         | 2.73281141                                  | 0.362005752                               | 7.292674805                       | 2.24459864                              |
| 7.51499025                         | 2.60822588                                  | 0.378977609                               | 7.231185608                       | 2.058542519                             |
| 11.38907996                        | 2.834895119                                 | 0.359888673                               | 7.568488114                       | 2.339958812                             |
| 7.276248746                        | 2.591292423                                 | 0.378732832                               | 7.49867318                        | 2.042010094                             |
| 9.792558319                        | 2.644253908                                 | 0.392147978                               | 6.667192335                       | 2.035241243                             |
| 3.80953047                         | 2.171476257                                 | 0.445668604                               | 6.183690462                       | 1.446701528                             |
| 9.622060607                        | 2.737529889                                 | 0.368150617                               | 7.335327558                       | 2.225546914                             |

| log.sigma.4.5.mm.3D_glmc_DifferenceVariance | log.sigma.4.5.mm.3D_glmc_ldn | log.sigma.4.5.mm.3D_glmc_ldm | log.sigma.4.5.mm.3D_glmc_Correlation | log.sigma.4.5.mm.3D_glmc_Autocorrelation |
|---------------------------------------------|------------------------------|------------------------------|--------------------------------------|------------------------------------------|
| 7.73949632                                  | 0.924504141                  | 0.30050107                   | 0.719871586                          | 499.6851386                              |
| 2.565385931                                 | 0.914527956                  | 0.443228288                  | 0.724996967                          | 65.99941125                              |
| 3.531761001                                 | 0.927519636                  | 0.391806072                  | 0.789172912                          | 187.479014                               |
| 5.397625142                                 | 0.917714924                  | 0.340592799                  | 0.776509278                          | 274.8809692                              |
| 3.532805522                                 | 0.929691736                  | 0.398864711                  | 0.723433064                          | 199.0161692                              |
| 4.159360129                                 | 0.919313343                  | 0.399830619                  | 0.734557587                          | 104.485639                               |
| 4.058066677                                 | 0.939417311                  | 0.359567088                  | 0.75603114                           | 248.3876876                              |
| 4.120869473                                 | 0.946969338                  | 0.393456758                  | 0.774533492                          | 506.4400213                              |
| 4.720907085                                 | 0.935483328                  | 0.368185023                  | 0.742415887                          | 359.0218853                              |
| 4.461225275                                 | 0.935334049                  | 0.349613644                  | 0.723410622                          | 534.4548257                              |
| 2.626297116                                 | 0.925293744                  | 0.410024314                  | 0.747040097                          | 134.9448534                              |
| 3.429456406                                 | 0.935030436                  | 0.377842761                  | 0.788242761                          | 262.0626494                              |
| 3.444093774                                 | 0.942760519                  | 0.463219185                  | 0.802104458                          | 226.3120363                              |
| 4.92157252                                  | 0.934584639                  | 0.381804424                  | 0.737932986                          | 349.903519                               |
| 4.713853257                                 | 0.928244716                  | 0.349181669                  | 0.72300157                           | 246.3863516                              |
| 4.159176784                                 | 0.925066508                  | 0.324058331                  | 0.751663308                          | 282.1663624                              |
| 3.960670527                                 | 0.921948985                  | 0.366493538                  | 0.69331619                           | 285.5291368                              |
| 3.490283902                                 | 0.922450577                  | 0.447659136                  | 0.7407818                            | 111.5826166                              |
| 2.032871303                                 | 0.913494103                  | 0.453406095                  | 0.755764315                          | 69.9662925                               |
| 4.131824634                                 | 0.935839276                  | 0.34757638                   | 0.778245927                          | 269.1196782                              |
| 2.430612031                                 | 0.939663577                  | 0.461398819                  | 0.766841341                          | 165.7024218                              |
| 2.522342551                                 | 0.918246322                  | 0.398408735                  | 0.747927594                          | 119.3407153                              |
| 2.537511602                                 | 0.92485877                   | 0.418512633                  | 0.804938678                          | 129.5260471                              |
| 3.539603984                                 | 0.937463253                  | 0.412525712                  | 0.716383223                          | 195.8706627                              |
| 5.155249552                                 | 0.923316689                  | 0.326017063                  | 0.587431282                          | 351.6104825                              |
| 5.28400658                                  | 0.936530291                  | 0.338524661                  | 0.7217498                            | 446.2066682                              |
| 6.09340044                                  | 0.943523404                  | 0.345701957                  | 0.763078243                          | 583.2722393                              |
| 3.200021885                                 | 0.932505038                  | 0.40246788                   | 0.747793841                          | 236.378105                               |
| 2.330828891                                 | 0.912159353                  | 0.434397315                  | 0.766025764                          | 81.27819503                              |
| 2.317344971                                 | 0.939208785                  | 0.45419498                   | 0.763048418                          | 198.6430048                              |
| 4.273317866                                 | 0.9405864                    | 0.384729574                  | 0.731747959                          | 386.2435764                              |
| 3.729788586                                 | 0.942006921                  | 0.46145564                   | 0.664303965                          | 334.3970887                              |
| 5.205040252                                 | 0.932703897                  | 0.334327725                  | 0.780346311                          | 324.293059                               |
| 4.843965443                                 | 0.930440121                  | 0.329835112                  | 0.732253531                          | 359.1156897                              |
| 3.678451901                                 | 0.933196478                  | 0.359363408                  | 0.736703829                          | 372.3921348                              |
| 3.535727916                                 | 0.936194832                  | 0.400884388                  | 0.7297308                            | 351.5349998                              |
| 5.223682592                                 | 0.952122034                  | 0.432573753                  | 0.727997479                          | 582.8294324                              |
| 5.787500423                                 | 0.944639937                  | 0.37522654                   | 0.807721822                          | 527.7210142                              |
| 1.273280965                                 | 0.921067638                  | 0.487262719                  | 0.653433321                          | 74.37604398                              |
| 5.006954577                                 | 0.928536017                  | 0.326274397                  | 0.789788387                          | 268.1794182                              |
| 5.199763913                                 | 0.940231613                  | 0.39970856                   | 0.682833188                          | 430.2388208                              |
| 5.511599139                                 | 0.937556942                  | 0.305892675                  | 0.750736183                          | 318.8926411                              |
| 5.275069753                                 | 0.924654922                  | 0.324201148                  | 0.690741125                          | 331.7714386                              |
| 4.84661967                                  | 0.94008319                   | 0.368424414                  | 0.686157538                          | 226.4599602                              |
| 2.994844496                                 | 0.926963456                  | 0.405379121                  | 0.776015115                          | 114.3330507                              |
| 5.309448742                                 | 0.935887965                  | 0.358576383                  | 0.719751432                          | 379.9168664                              |
| 3.705524809                                 | 0.937452773                  | 0.388365158                  | 0.726962229                          | 272.9436906                              |
| 1.82381015                                  | 0.913498213                  | 0.469129764                  | 0.771624248                          | 58.3730964                               |
| 2.996870556                                 | 0.928723764                  | 0.404389529                  | 0.802808906                          | 157.9466384                              |
| 2.625049998                                 | 0.928936459                  | 0.434010122                  | 0.738933189                          | 89.91145735                              |
| 4.232147845                                 | 0.924228333                  | 0.340098174                  | 0.750337243                          | 281.9628822                              |
| 5.538432487                                 | 0.924140578                  | 0.310121847                  | 0.704138274                          | 264.465116                               |
| 3.039522753                                 | 0.935826279                  | 0.40221072                   | 0.777642743                          | 211.3362275                              |
| 4.747868082                                 | 0.911926974                  | 0.341505205                  | 0.609101789                          | 201.6872087                              |
| 4.434636063                                 | 0.917539509                  | 0.368245073                  | 0.738175851                          | 139.8514329                              |
| 2.97037597                                  | 0.942926376                  | 0.396827411                  | 0.722354131                          | 373.2043288                              |
| 4.42862463                                  | 0.927225196                  | 0.326545158                  | 0.737458124                          | 312.4328958                              |
| 4.20395176                                  | 0.940680535                  | 0.389329445                  | 0.768517078                          | 454.4751701                              |
| 3.608014404                                 | 0.932600493                  | 0.419517213                  | 0.600740356                          | 256.0055613                              |
| 4.277992527                                 | 0.94234475                   | 0.394930593                  | 0.753238061                          | 356.6300398                              |
| 3.853317267                                 | 0.941400042                  | 0.430179821                  | 0.753503655                          | 187.2763695                              |
| 3.753223522                                 | 0.933248769                  | 0.3734935425                 | 0.773744341                          | 252.319255                               |
| 5.213430509                                 | 0.946248439                  | 0.346915996                  | 0.732552243                          | 635.6887002                              |
| 4.009142378                                 | 0.94476291                   | 0.388652746                  | 0.777755671                          | 339.949725                               |
| 3.04746135                                  | 0.922743518                  | 0.38562118                   | 0.652513328                          | 161.3681666                              |
| 3.757696111                                 | 0.950835932                  | 0.422724863                  | 0.790979352                          | 453.6997934                              |
| 1.985747242                                 | 0.944099512                  | 0.532713854                  | 0.714169671                          | 158.3842586                              |
| 4.940272293                                 | 0.943873037                  | 0.363643094                  | 0.752132761                          | 420.9345795                              |
| 4.026040099                                 | 0.942522922                  | 0.382556513                  | 0.725268885                          | 412.6288589                              |
| 2.542099923                                 | 0.935782937                  | 0.452981197                  | 0.74597972                           | 193.2488404                              |
| 4.384061627                                 | 0.935807992                  | 0.387630173                  | 0.721290891                          | 339.7261633                              |
| 4.595188671                                 | 0.943720198                  | 0.384315496                  | 0.772383153                          | 456.4526256                              |
| 4.016851297                                 | 0.937082907                  | 0.3759215098                 | 0.726601059                          | 446.690936                               |
| 5.384818069                                 | 0.919322517                  | 0.333672243                  | 0.68568325                           | 278.2894015                              |
| 4.827214916                                 | 0.931619464                  | 0.346930868                  | 0.785486193                          | 257.4452767                              |
| 3.72225872                                  | 0.930920078                  | 0.402960175                  | 0.698499021                          | 282.0558238                              |
| 3.026909923                                 | 0.938334319                  | 0.448953514                  | 0.670591219                          | 199.3031511                              |
| 2.518141082                                 | 0.937491098                  | 0.454410417                  | 0.827858088                          | 120.9319382                              |
| 2.518876075                                 | 0.930841542                  | 0.418149009                  | 0.764870652                          | 170.6543347                              |
| 6.784124155                                 | 0.934416918                  | 0.312130609                  | 0.783391482                          | 554.6127089                              |
| 7.966394741                                 | 0.926752083                  | 0.304698466                  | 0.739648747                          | 542.8193217                              |
| 3.58277269                                  | 0.94818917                   | 0.430432267                  | 0.699880695                          | 306.2460227                              |
| 4.201949782                                 | 0.938845288                  | 0.37755317                   | 0.748573436                          | 380.9750056                              |
| 2.63486952                                  | 0.940101311                  | 0.408233083                  | 0.795629255                          | 294.7791987                              |
| 4.920548837                                 | 0.937299221                  | 0.339304799                  | 0.78218444                           | 361.2035775                              |
| 1.99812321                                  | 0.940398009                  | 0.484801635                  | 0.824916951                          | 142.5379278                              |
| 5.763882524                                 | 0.925142086                  | 0.34658654                   | 0.734230266                          | 344.5477246                              |
| 4.591921611                                 | 0.938844267                  | 0.376039021                  | 0.703700476                          | 370.9166928                              |
| 2.887354978                                 | 0.925869844                  | 0.401851736                  | 0.756602301                          | 148.2580094                              |
| 3.503541451                                 | 0.936915893                  | 0.407506019                  | 0.76590579                           | 254.7923064                              |
| 2.906646377                                 | 0.92704883                   | 0.493607732                  | 0.802971814                          | 105.0548815                              |
| 4.959468727                                 | 0.923220467                  | 0.336663886                  | 0.757226284                          | 234.2905839                              |
| 4.145164543                                 | 0.943012941                  | 0.376667489                  | 0.728275102                          | 492.8997765                              |
| 4.047654686                                 | 0.931886432                  | 0.371965956                  | 0.694360234                          | 270.6234553                              |
| 3.145322915                                 | 0.936684399                  | 0.383229314                  | 0.741163671                          | 230.6279166                              |
| 5.727176148                                 | 0.947569898                  | 0.387850807                  | 0.78243681                           | 672.6517732                              |
| 2.974076812                                 | 0.937055538                  | 0.384285229                  | 0.842117201                          | 236.8505568                              |
| 5.356330349                                 | 0.939226989                  | 0.451573004                  | 0.761854998                          | 417.0145681                              |
| 1.617796072                                 | 0.925904163                  | 0.481977578                  | 0.751578062                          | 111.0045723                              |
| 4.475168387                                 | 0.928379193                  | 0.380633807                  | 0.693915994                          | 218.4889683                              |

| log.sigma.4.5.mm.3D_glcm_SumEntropy | log.sigma.4.5.mm.3D_glcm_AverageIntensity | log.sigma.4.5.mm.3D_glcm_Energy | log.sigma.4.5.mm.3D_glcm_SumSquares | log.sigma.4.5.mm.3D_glcm_ClusterProminence |
|-------------------------------------|-------------------------------------------|---------------------------------|-------------------------------------|--------------------------------------------|
| 5.35166625                          | 21.92996393                               | 0.005837632                     | 31.07016546                         | 41186.0161                                 |
| 4.417616491                         | 7.646549732                               | 0.019586289                     | 10.3705478                          | 3151.692557                                |
| 5.016340957                         | 13.12731583                               | 0.00866827                      | 19.10500188                         | 11424.00838                                |
| 5.199034777                         | 15.95389988                               | 0.00785928                      | 27.99166352                         | 27945.7571                                 |
| 4.792703033                         | 13.74485311                               | 0.011311822                     | 13.93490866                         | 6721.089449                                |
| 4.755918591                         | 9.56646276                                | 0.015855494                     | 17.63542262                         | 8525.905141                                |
| 5.06416276                          | 15.33601946                               | 0.007640063                     | 19.83505183                         | 15076.55859                                |
| 4.992315679                         | 22.20578474                               | 0.010705129                     | 19.11052169                         | 18056.61937                                |
| 5.091763568                         | 18.62304793                               | 0.007679976                     | 20.45338401                         | 15298.13235                                |
| 4.908026121                         | 22.88101716                               | 0.008713827                     | 18.57704879                         | 17609.5966                                 |
| 4.731286123                         | 11.20232347                               | 0.011380075                     | 12.62440564                         | 5433.43955                                 |
| 5.02882129                          | 15.74966677                               | 0.008810636                     | 19.25082745                         | 12887.38988                                |
| 4.764478879                         | 14.61014496                               | 0.019387114                     | 17.22767837                         | 14830.84894                                |
| 4.977699455                         | 18.36552931                               | 0.010857478                     | 20.1519633                          | 18413.57887                                |
| 4.9932635                           | 15.26934945                               | 0.009496661                     | 20.08125924                         | 17742.53122                                |
| 5.139418144                         | 16.34812305                               | 0.006992652                     | 22.94383394                         | 19121.61612                                |
| 4.70762391                          | 16.58107153                               | 0.01163051                      | 15.22688486                         | 11412.32783                                |
| 4.54583934                          | 10.06346156                               | 0.019485573                     | 13.82295047                         | 6219.992896                                |
| 4.467572395                         | 7.902310242                               | 0.017412467                     | 9.945236537                         | 2780.087367                                |
| 5.180095168                         | 15.92899703                               | 0.006927518                     | 22.80658061                         | 18033.48505                                |
| 4.619702162                         | 12.53177384                               | 0.01664051                      | 11.24361708                         | 4572.946762                                |
| 4.694632197                         | 10.48924376                               | 0.011550669                     | 12.42651326                         | 4710.436142                                |
| 4.827446305                         | 10.81626292                               | 0.01322914                      | 15.47229877                         | 8206.115186                                |
| 4.743869368                         | 13.65614705                               | 0.01213167                      | 13.51637455                         | 7314.043356                                |
| 4.794313117                         | 18.58710019                               | 0.009074164                     | 15.60575377                         | 7776.417228                                |
| 5.059645796                         | 20.80908512                               | 0.00855198                      | 21.70580474                         | 26399.94205                                |
| 5.204631711                         | 23.78107475                               | 0.008119816                     | 27.30924287                         | 48592.45344                                |
| 4.786863892                         | 15.02313662                               | 0.012340078                     | 14.51970321                         | 8730.846326                                |
| 4.474560946                         | 8.496431033                               | 0.019226089                     | 11.88369681                         | 4094.71538                                 |
| 4.610299659                         | 13.80000129                               | 0.016249096                     | 10.7477474                          | 4616.016052                                |
| 4.944856303                         | 19.41811998                               | 0.009558685                     | 17.34214509                         | 12189.67002                                |
| 4.318262357                         | 18.10577345                               | 0.022952012                     | 10.49070165                         | 8881.758129                                |
| 5.275696651                         | 17.46529298                               | 0.00651889                      | 27.87045186                         | 30804.60653                                |
| 5.076833703                         | 18.60607306                               | 0.00798427                      | 22.3172784                          | 23515.26428                                |
| 4.944836203                         | 19.04539333                               | 0.008261945                     | 17.28249893                         | 12013.87314                                |
| 4.790336044                         | 18.52095143                               | 0.010863903                     | 14.74176932                         | 8717.986234                                |
| 4.746553366                         | 23.91377085                               | 0.017317266                     | 17.43185896                         | 28589.93375                                |
| 5.403737125                         | 22.4883355                                | 0.008137364                     | 31.65838642                         | 41422.97249                                |
| 3.984253486                         | 8.447117246                               | 0.024548362                     | 4.614826977                         | 684.9482145                                |
| 5.36901293                          | 15.72800565                               | 0.005306829                     | 28.98270435                         | 29700.9074                                 |
| 4.738949586                         | 20.57392638                               | 0.014019018                     | 16.07902095                         | 18280.56949                                |
| 5.276556296                         | 17.39869468                               | 0.005789869                     | 27.35546543                         | 34630.09665                                |
| 5.072627202                         | 17.91446256                               | 0.006858756                     | 20.97577976                         | 14724.6764                                 |
| 4.835251541                         | 14.73079077                               | 0.009859507                     | 15.62640773                         | 9622.537237                                |
| 4.730645869                         | 10.12256854                               | 0.013462452                     | 15.2350958                          | 8278.085887                                |
| 5.052405964                         | 19.18126591                               | 0.007815264                     | 20.78970319                         | 21444.18855                                |
| 4.866909642                         | 16.2238728                                | 0.01028609                      | 15.59606341                         | 8964.924773                                |
| 4.366602826                         | 7.149711728                               | 0.020278121                     | 9.386425367                         | 2447.494181                                |
| 4.896883735                         | 11.99196219                               | 0.011180902                     | 17.58439602                         | 12096.56267                                |
| 4.59094633                          | 9.006317702                               | 0.015570308                     | 11.83210899                         | 4982.309888                                |
| 5.105595305                         | 16.35857241                               | 0.006953871                     | 21.20225571                         | 15323.67089                                |
| 5.156128962                         | 15.84126536                               | 0.005860513                     | 23.2473634                          | 16638.21768                                |
| 4.906161908                         | 14.11773825                               | 0.010643765                     | 15.89401275                         | 9587.397792                                |
| 4.744611866                         | 13.89059354                               | 0.009139111                     | 14.35907373                         | 5525.608802                                |
| 4.962861647                         | 11.21153511                               | 0.008569527                     | 19.13841963                         | 9887.584252                                |
| 4.70948462                          | 19.13543651                               | 0.012601462                     | 12.68876243                         | 6585.923007                                |
| 5.126839398                         | 17.28918325                               | 0.00644894                      | 21.75033779                         | 16847.60976                                |
| 4.917632751                         | 21.04031715                               | 0.01140182                      | 19.13921123                         | 26431.18134                                |
| 4.446141536                         | 15.82429794                               | 0.015137143                     | 9.30075066                          | 3214.299318                                |
| 5.03047345                          | 18.56499859                               | 0.009100306                     | 18.77743107                         | 15442.94417                                |
| 4.740309844                         | 13.26348333                               | 0.015460701                     | 15.95621703                         | 10419.82928                                |
| 5.010376326                         | 15.43347581                               | 0.008587393                     | 19.45890306                         | 12677.31212                                |
| 5.110349929                         | 24.97185777                               | 0.007363501                     | 21.98834363                         | 23942.97026                                |
| 5.006648501                         | 18.0916936                                | 0.010804052                     | 20.02128931                         | 17966.93893                                |
| 4.524171171                         | 12.42082796                               | 0.013007969                     | 10.76094883                         | 3761.793818                                |
| 4.932565113                         | 20.99254392                               | 0.013474279                     | 18.16950463                         | 18644.24053                                |
| 4.201220757                         | 12.39398811                               | 0.029840195                     | 6.667077753                         | 2296.696531                                |
| 5.099076945                         | 20.19063788                               | 0.008833982                     | 21.41184993                         | 24223.62592                                |
| 4.893236036                         | 20.08648802                               | 0.009688148                     | 16.19318304                         | 13183.47799                                |
| 4.593528134                         | 13.6070337                                | 0.014614773                     | 10.82174857                         | 3785.420209                                |
| 4.71738227                          | 18.17473677                               | 0.012693153                     | 17.18388023                         | 17115.03523                                |
| 5.084902971                         | 21.03427316                               | 0.009225473                     | 20.84468352                         | 18647.18055                                |
| 4.831599859                         | 20.9267595                                | 0.011169783                     | 16.49968738                         | 16663.76639                                |
| 5.023236544                         | 16.29791805                               | 0.007562778                     | 20.15369213                         | 15142.74305                                |
| 5.262812742                         | 15.44602359                               | 0.006966787                     | 26.65960399                         | 25250.4701                                 |
| 4.68841242                          | 16.51215306                               | 0.012951533                     | 13.48247235                         | 8318.104863                                |
| 4.511771136                         | 13.88480385                               | 0.015003787                     | 9.608575905                         | 3412.446794                                |
| 4.710746972                         | 10.37421183                               | 0.019964943                     | 16.03104846                         | 11573.26607                                |
| 4.713457304                         | 12.69118775                               | 0.012855126                     | 12.50010144                         | 5348.489982                                |
| 5.331019416                         | 23.02190986                               | 0.006654004                     | 35.12071355                         | 69418.09806                                |
| 5.396300515                         | 22.84885346                               | 0.00593303                      | 33.53144728                         | 53213.14972                                |
| 4.579924555                         | 17.30620773                               | 0.016862742                     | 12.45676925                         | 10783.35854                                |
| 4.966661865                         | 19.23748151                               | 0.010422398                     | 18.55111882                         | 16313.94248                                |
| 4.841702919                         | 16.8261241                                | 0.011836604                     | 15.53389723                         | 13830.96757                                |
| 5.271103421                         | 18.51870717                               | 0.006748254                     | 26.68837131                         | 31877.96675                                |
| 4.571399052                         | 11.50400163                               | 0.019944729                     | 12.30503482                         | 5307.438929                                |
| 5.116956323                         | 18.16127162                               | 0.00823442                      | 24.39247241                         | 25458.70481                                |
| 4.909707447                         | 19.0468313                                | 0.00974704                      | 16.79103642                         | 10100.69503                                |
| 4.777917016                         | 11.7301455                                | 0.012165875                     | 14.05192033                         | 6684.425474                                |
| 4.893282343                         | 15.58882175                               | 0.011790435                     | 16.58661654                         | 11229.3127                                 |
| 4.442348807                         | 9.637944785                               | 0.028296254                     | 15.09541575                         | 5577.41193                                 |
| 5.207828998                         | 14.72814578                               | 0.006597084                     | 24.54090788                         | 20675.49207                                |
| 4.918851212                         | 21.98160943                               | 0.010042877                     | 16.65552788                         | 16168.48235                                |
| 4.846585655                         | 16.15858047                               | 0.010159799                     | 15.52708947                         | 8873.644209                                |
| 4.85910923                          | 14.83626945                               | 0.009668425                     | 14.66289106                         | 7928.730975                                |
| 5.153181916                         | 25.61387645                               | 0.009991299                     | 26.34983509                         | 37585.91366                                |
| 5.19245559                          | 14.76004603                               | 0.008447347                     | 23.30221586                         | 21121.30612                                |
| 4.617658986                         | 20.09731902                               | 0.019185827                     | 20.40869152                         | 36206.89271                                |
| 4.363295293                         | 10.25624575                               | 0.019233059                     | 7.716706326                         | 2218.575767                                |
| 4.861680124                         | 14.41541852                               | 0.009237056                     | 15.88146475                         | 7647.499828                                |

| log.sigma.4.5.mm.3D_glc_m_SumAverage | log.sigma.4.5.mm.3D_glc_m_Ibc2 | log.sigma.4.5.mm.3D_glc_m_Ibc1 | log.sigma.4.5.mm.3D_glc_m_DifferenceAverage | log.sigma.4.5.mm.3D_glc_m_Id |
|--------------------------------------|--------------------------------|--------------------------------|---------------------------------------------|------------------------------|
| 43.6761736                           | 0.890280981                    | -0.183658918                   | 3.129639637                                 | 0.382730757                  |
| 15.29309946                          | 0.87807875                     | -0.220342805                   | 1.717536213                                 | 0.502324902                  |
| 26.25463166                          | 0.911789                       | -0.228678964                   | 2.078521296                                 | 0.460840607                  |
| 31.83909463                          | 0.928458017                    | -0.235529038                   | 2.593807536                                 | 0.41829015                   |
| 27.48970622                          | 0.869093214                    | -0.188573181                   | 2.011665448                                 | 0.46702912                   |
| 19.13292552                          | 0.912313014                    | -0.246413577                   | 2.182226762                                 | 0.467113311                  |
| 30.57074014                          | 0.870451465                    | -0.181264103                   | 2.301268787                                 | 0.43548229                   |
| 44.3346827                           | 0.89837156                     | -0.199102292                   | 2.117707799                                 | 0.462255485                  |
| 37.09407357                          | 0.870692771                    | -0.185543023                   | 2.339696508                                 | 0.440901235                  |
| 45.63903449                          | 0.897838719                    | -0.208862044                   | 2.403902613                                 | 0.427447823                  |
| 22.40464694                          | 0.875539814                    | -0.206098743                   | 1.885269782                                 | 0.477189695                  |
| 31.43870805                          | 0.901987886                    | -0.209950755                   | 2.120082149                                 | 0.450197785                  |
| 29.17231286                          | 0.927295904                    | -0.266832959                   | 1.749826283                                 | 0.518842113                  |
| 36.61471301                          | 0.89837864                     | -0.208171006                   | 2.308816595                                 | 0.451579748                  |
| 30.47295334                          | 0.875316988                    | -0.185211582                   | 2.458464724                                 | 0.426406157                  |
| 32.57721539                          | 0.8836037                      | -0.189091356                   | 2.5630853                                   | 0.406714126                  |
| 33.16214306                          | 0.85122745                     | -0.177510219                   | 2.256137382                                 | 0.441515961                  |
| 20.12692311                          | 0.887748986                    | -0.22397054                    | 1.828224958                                 | 0.505650842                  |
| 15.80462048                          | 0.870916602                    | -0.215388087                   | 1.629886218                                 | 0.512538785                  |
| 31.72996869                          | 0.886073846                    | -0.18954792                    | 2.375625995                                 | 0.425612721                  |
| 25.06354769                          | 0.884276481                    | -0.218443317                   | 1.630949947                                 | 0.517975879                  |
| 20.97848753                          | 0.885323655                    | -0.21117843                    | 1.892006548                                 | 0.468299254                  |
| 21.63252585                          | 0.92221642                     | -0.253953945                   | 1.812703667                                 | 0.483360253                  |
| 27.29561941                          | 0.859836571                    | -0.184654791                   | 1.979336069                                 | 0.478445328                  |
| 37.02050891                          | 0.834445698                    | -0.163958045                   | 2.647380453                                 | 0.407299665                  |
| 41.48188093                          | 0.872748574                    | -0.181755081                   | 2.571803098                                 | 0.416754839                  |
| 47.42924025                          | 0.899551398                    | -0.200592235                   | 2.58654644                                  | 0.421680625                  |
| 30.03698778                          | 0.865843974                    | -0.186832702                   | 1.991070722                                 | 0.470424884                  |
| 16.99286207                          | 0.911482956                    | -0.255102369                   | 1.760370613                                 | 0.496420261                  |
| 27.60000257                          | 0.883745814                    | -0.215374564                   | 1.639636597                                 | 0.512423875                  |
| 38.65703992                          | 0.862215061                    | -0.180553414                   | 2.2008824                                   | 0.454671558                  |
| 36.19305616                          | 0.822704427                    | -0.174045246                   | 1.780224146                                 | 0.516608884                  |
| 34.79538499                          | 0.896749525                    | -0.197633012                   | 2.590793948                                 | 0.413198637                  |
| 37.03188613                          | 0.877964223                    | -0.184693155                   | 2.601541585                                 | 0.410393853                  |
| 37.94196207                          | 0.853341104                    | -0.170400025                   | 2.258391999                                 | 0.436042674                  |
| 36.93326821                          | 0.868218017                    | -0.191066726                   | 2.020016004                                 | 0.46894906                   |
| 47.75006028                          | 0.88049241                     | -0.207841277                   | 2.030641998                                 | 0.492669515                  |
| 44.81130168                          | 0.935047094                    | -0.242838485                   | 2.477491357                                 | 0.4476411                    |
| 16.89423449                          | 0.780989698                    | -0.163572787                   | 1.362587908                                 | 0.538929723                  |
| 31.34420023                          | 0.887058414                    | -0.184260066                   | 2.601571425                                 | 0.407196587                  |
| 40.94310264                          | 0.84362586                     | -0.167896754                   | 2.23510031                                  | 0.465607674                  |
| 34.55589744                          | 0.875170422                    | -0.176537692                   | 2.790519403                                 | 0.390308384                  |
| 35.64226863                          | 0.834878146                    | -0.155100239                   | 2.680820294                                 | 0.405021171                  |
| 29.3873719                           | 0.837506217                    | -0.161797325                   | 1.927986403                                 | 0.442283525                  |
| 20.24513708                          | 0.894080934                    | -0.21732526                    | 2.125050782                                 | 0.47249018                   |
| 38.20700375                          | 0.874721662                    | -0.184770538                   | 2.469327584                                 | 0.432009236                  |
| 32.36404184                          | 0.854004844                    | -0.175986653                   | 2.11149758                                  | 0.458973502                  |
| 14.29942346                          | 0.885017845                    | -0.235734915                   | 1.528291467                                 | 0.524819624                  |
| 23.98392439                          | 0.929625737                    | -0.257262548                   | 1.953218742                                 | 0.473058121                  |
| 18.0126354                           | 0.886206727                    | -0.228348478                   | 1.792619583                                 | 0.496769522                  |
| 32.63706759                          | 0.87652843                     | -0.18286967                    | 2.429140703                                 | 0.419640922                  |
| 31.52856839                          | 0.841079052                    | -0.152062231                   | 2.779921287                                 | 0.393736557                  |
| 28.21561745                          | 0.882073637                    | -0.19893434                    | 1.951821498                                 | 0.470368235                  |
| 27.78118708                          | 0.836878442                    | -0.162017955                   | 2.488946285                                 | 0.420027581                  |
| 22.42307022                          | 0.891744619                    | -0.204996451                   | 2.316596047                                 | 0.44166231                   |
| 38.16280049                          | 0.8617852                      | -0.188134408                   | 1.96352315                                  | 0.466124959                  |
| 34.44694246                          | 0.85606299                     | -0.167009389                   | 2.563385838                                 | 0.407772292                  |
| 41.93513292                          | 0.881942476                    | -0.200331677                   | 2.134218188                                 | 0.458741228                  |
| 31.64859588                          | 0.806093126                    | -0.152397203                   | 1.928918998                                 | 0.483521438                  |
| 37.01327331                          | 0.865906445                    | -0.180299983                   | 2.193943184                                 | 0.464361195                  |
| 26.48852668                          | 0.894610844                    | -0.218328875                   | 1.91993084                                  | 0.491604563                  |
| 30.81819093                          | 0.891215886                    | -0.200329891                   | 2.18954183                                  | 0.447621565                  |
| 49.7922055                           | 0.859670573                    | -0.167835955                   | 2.498306419                                 | 0.42370724                   |
| 36.02431853                          | 0.878159275                    | -0.194467356                   | 2.150610062                                 | 0.458235947                  |
| 24.84165591                          | 0.860722619                    | -0.197658781                   | 2.04434365                                  | 0.459304591                  |
| 41.91265274                          | 0.907494495                    | -0.224680156                   | 1.955367258                                 | 0.486358029                  |
| 24.78797623                          | 0.869835184                    | -0.22426152                    | 1.3257819                                   | 0.575537017                  |
| 40.22710837                          | 0.870592938                    | -0.178696792                   | 2.376189039                                 | 0.437582086                  |
| 40.03667584                          | 0.844241655                    | -0.166703651                   | 2.17989986                                  | 0.453734028                  |
| 27.21406739                          | 0.870705989                    | -0.205505527                   | 1.67584321                                  | 0.511365622                  |
| 36.20015635                          | 0.892903476                    | -0.214790379                   | 2.187906075                                 | 0.456604425                  |
| 41.95999552                          | 0.896459268                    | -0.203965062                   | 2.202676277                                 | 0.454233376                  |
| 41.69447663                          | 0.867898716                    | -0.188256071                   | 2.196683951                                 | 0.448664386                  |
| 32.53790968                          | 0.843153248                    | -0.158788178                   | 2.624113422                                 | 0.412688535                  |
| 30.78192647                          | 0.902998696                    | -0.205718986                   | 2.484305193                                 | 0.424446235                  |
| 33.02281836                          | 0.860968493                    | -0.190458187                   | 2.055943809                                 | 0.469943804                  |
| 27.76960769                          | 0.842806836                    | -0.186001453                   | 1.748405387                                 | 0.507696749                  |
| 20.74842366                          | 0.935899225                    | -0.281522023                   | 1.694373224                                 | 0.513155759                  |
| 25.38237549                          | 0.885271755                    | -0.209105882                   | 1.805436984                                 | 0.484382541                  |
| 45.89441328                          | 0.908870115                    | -0.20734687                    | 2.893785393                                 | 0.393695307                  |
| 45.49197824                          | 0.907898611                    | -0.200317262                   | 3.114301277                                 | 0.386070261                  |
| 34.50518282                          | 0.85618937                     | -0.186706891                   | 1.899734421                                 | 0.492079787                  |
| 38.32433715                          | 0.883763779                    | -0.199291571                   | 2.201913927                                 | 0.449775913                  |
| 33.61743572                          | 0.886805912                    | -0.211989533                   | 1.871009584                                 | 0.475105208                  |
| 36.89060198                          | 0.907703822                    | -0.210205473                   | 2.532732276                                 | 0.417920603                  |
| 23.00800326                          | 0.919097252                    | -0.264436073                   | 1.474019713                                 | 0.536734616                  |
| 36.16184553                          | 0.875330017                    | -0.183114401                   | 2.594703556                                 | 0.421948084                  |
| 37.90290584                          | 0.863383855                    | -0.177790628                   | 2.272230896                                 | 0.447562038                  |
| 23.46029099                          | 0.893914182                    | -0.214780182                   | 1.953001754                                 | 0.471103804                  |
| 31.13009975                          | 0.899016365                    | -0.21740721                    | 1.995737202                                 | 0.474191214                  |
| 19.27588957                          | 0.926215968                    | -0.291726005                   | 1.632360392                                 | 0.5431942                    |
| 29.39159202                          | 0.891571474                    | -0.191622547                   | 2.562130756                                 | 0.415542907                  |
| 43.83951421                          | 0.852109002                    | -0.17269836                    | 2.221965947                                 | 0.448507427                  |
| 32.25123904                          | 0.839065014                    | -0.166360454                   | 2.24459864                                  | 0.445131308                  |
| 29.65379717                          | 0.855303955                    | -0.177054632                   | 2.058542519                                 | 0.455208593                  |
| 51.07382144                          | 0.914738485                    | -0.222279081                   | 2.339958812                                 | 0.456475822                  |
| 29.48865538                          | 0.927662351                    | -0.24170092                    | 2.042010094                                 | 0.456206932                  |
| 40.078939                            | 0.913601608                    | -0.247071244                   | 2.035241243                                 | 0.507158404                  |
| 20.5124915                           | 0.87880747                     | -0.228414763                   | 1.446701528                                 | 0.534822623                  |
| 28.81197214                          | 0.832510258                    | -0.16166154                    | 2.225546914                                 | 0.451810041                  |

| log.sigma.4.5.mm.3D_glcm_ClusterTendency | log.sigma.4.5.mm.3D_firstorder_InterquartileRange | log.sigma.4.5.mm.3D_firstorder_Skewness | log.sigma.4.5.mm.3D_firstorder_Uniformity |
|------------------------------------------|---------------------------------------------------|-----------------------------------------|-------------------------------------------|
| 108.9788324                              | 160.580369                                        | -0.566039833                            | 0.056268383                               |
| 35.79359165                              | 109.600462                                        | 0.559214097                             | 0.100840173                               |
| 68.39308313                              | 161.8659744                                       | 0.134596405                             | 0.063249525                               |
| 97.9232721                               | 151.2414916                                       | -0.434358972                            | 0.060571235                               |
| 48.04989481                              | 120.6650524                                       | 0.164542136                             | 0.078912527                               |
| 61.18039142                              | 160.0324721                                       | 0.525314014                             | 0.081432507                               |
| 68.45938374                              | 151.1892128                                       | 0.329255753                             | 0.065168158                               |
| 68.83725797                              | 132.562294                                        | 0.135830942                             | 0.072656692                               |
| 70.5077679                               | 150.1422997                                       | 0.03904928                              | 0.063371269                               |
| 65.25692556                              | 152.1788273                                       | -0.581868112                            | 0.067414792                               |
| 44.12143379                              | 131.6102748                                       | 0.073266453                             | 0.078086633                               |
| 67.7511302                               | 148.5509071                                       | 0.01234169                              | 0.067915547                               |
| 60.81705092                              | 90.78926373                                       | 0.378322093                             | 0.094398841                               |
| 69.31663565                              | 130.164566                                        | -0.18817897                             | 0.07266843                                |
| 67.84125762                              | 119.2576847                                       | 0.037453599                             | 0.073062829                               |
| 78.56270699                              | 163.5550089                                       | -0.220344091                            | 0.059761112                               |
| 51.62256548                              | 110.397243                                        | -1.063834685                            | 0.085626345                               |
| 48.24670818                              | 115.4984722                                       | 0.782719444                             | 0.097836004                               |
| 34.90438726                              | 115.0197434                                       | 0.438509951                             | 0.096110883                               |
| 79.5763991                               | 157.0981216                                       | 0.118990442                             | 0.059716864                               |
| 39.79443066                              | 111.269824                                        | 0.236336362                             | 0.089820239                               |
| 43.45976881                              | 127.7826214                                       | 0.12830025                              | 0.078869409                               |
| 55.94594227                              | 128.7111416                                       | 0.351998663                             | 0.077047348                               |
| 45.97611675                              | 113.3953075                                       | 0.380185414                             | 0.081510614                               |
| 48.37057293                              | 126.2144394                                       | -0.258009887                            | 0.073155741                               |
| 76.07824606                              | 128.7808075                                       | -0.571470892                            | 0.067864945                               |
| 96.50616013                              | 128.8762169                                       | -0.780303184                            | 0.06676882                                |
| 50.52785211                              | 110.906096                                        | 0.105731309                             | 0.082331015                               |
| 41.91886196                              | 125.3994484                                       | 0.600023293                             | 0.095646342                               |
| 37.89372224                              | 98.63033772                                       | 0.149947971                             | 0.092991659                               |
| 59.88408343                              | 140.6890841                                       | -0.009584468                            | 0.069754954                               |
| 34.65741755                              | 73.11765099                                       | -1.651476331                            | 0.121676263                               |
| 98.51436089                              | 156.0751688                                       | -0.36359755                             | 0.056910791                               |
| 76.9180242                               | 141.4211674                                       | -0.506400375                            | 0.063710276                               |
| 58.86332603                              | 139.4611206                                       | -0.177783003                            | 0.069668623                               |
| 49.79718915                              | 132.9233685                                       | -0.332744854                            | 0.076359231                               |
| 60.793648                                | 90.34583664                                       | -1.034035432                            | 0.095321548                               |
| 115.029509                               | 187.6700921                                       | -0.191953693                            | 0.053771709                               |
| 15.26414475                              | 74.00901508                                       | -0.145962065                            | 0.129068676                               |
| 102.2202491                              | 176.7437444                                       | 0.061547632                             | 0.052570739                               |
| 54.95834685                              | 98.06580877                                       | -1.193962603                            | 0.089470155                               |
| 95.01211994                              | 157.0211325                                       | 0.315668389                             | 0.058055842                               |
| 69.55534857                              | 147.9740868                                       | 0.091146567                             | 0.063265522                               |
| 51.84355059                              | 116.7860665                                       | -0.173351014                            | 0.076663483                               |
| 54.13701777                              | 132.1037083                                       | 0.665605166                             | 0.080287323                               |
| 71.53572956                              | 147.2708893                                       | -0.364821368                            | 0.064416906                               |
| 52.60249213                              | 123.0870113                                       | 0.182086325                             | 0.076054673                               |
| 33.25108227                              | 116.7626762                                       | 0.48209149                              | 0.098580224                               |
| 63.39393994                              | 142.7746449                                       | 0.398921858                             | 0.071448396                               |
| 41.25278035                              | 131.6652822                                       | 0.53466261                              | 0.085041665                               |
| 72.74695093                              | 156.0416183                                       | -0.16132928                             | 0.062168463                               |
| 77.26304422                              | 155.3185272                                       | 0.171674459                             | 0.060201215                               |
| 56.01445782                              | 120.769094                                        | 0.23127854                              | 0.075323566                               |
| 46.18613882                              | 139.2104378                                       | 0.061433075                             | 0.072595043                               |
| 66.51178597                              | 172.2571125                                       | 0.261104594                             | 0.064669569                               |
| 43.33678944                              | 104.6177578                                       | -0.156437904                            | 0.084083629                               |
| 74.32128284                              | 161.8712578                                       | -0.179584854                            | 0.059969289                               |
| 68.25551512                              | 117.4973984                                       | -1.011256969                            | 0.075780556                               |
| 29.79092152                              | 97.50589037                                       | -0.385347398                            | 0.095212496                               |
| 65.74236499                              | 140.8643129                                       | 0.133440616                             | 0.06933462                                |
| 55.09606517                              | 122.4134603                                       | 0.81950658                              | 0.0851519                                 |
| 68.0882111                               | 159.7318735                                       | 0.003307201                             | 0.065833158                               |
| 75.1000688                               | 143.9709587                                       | -0.213254746                            | 0.065769597                               |
| 70.83610257                              | 138.4584155                                       | 0.553897275                             | 0.069988588                               |
| 35.61717401                              | 121.3601151                                       | 0.204699367                             | 0.082855312                               |
| 65.7922515                               | 126.8593311                                       | 0.018643484                             | 0.07832347                                |
| 22.86382722                              | 71.25671434                                       | 0.058286768                             | 0.127255919                               |
| 76.19896278                              | 127.6148049                                       | -0.110211786                            | 0.068110797                               |
| 56.42936931                              | 132.0978127                                       | -0.529094547                            | 0.069204231                               |
| 37.81939989                              | 121.6538143                                       | 0.094445287                             | 0.086132318                               |
| 57.75605901                              | 126.2059669                                       | -0.636747697                            | 0.08032649                                |
| 74.68064434                              | 146.6783619                                       | 0.082515493                             | 0.065271977                               |
| 57.31981785                              | 119.6695957                                       | -0.819763361                            | 0.076157703                               |
| 66.90321656                              | 138.0367565                                       | -0.442932619                            | 0.067392032                               |
| 93.43649033                              | 159.59126                                         | 0.367763679                             | 0.059039222                               |
| 45.75385397                              | 101.6583643                                       | -0.838012692                            | 0.087736346                               |
| 32.21945284                              | 105.6860323                                       | -0.188522395                            | 0.090027968                               |
| 58.64117236                              | 133.7643752                                       | 0.846360573                             | 0.090975458                               |
| 44.13440452                              | 121.3715649                                       | 0.173747524                             | 0.082743135                               |
| 127.4210522                              | 157.9417849                                       | -1.065329605                            | 0.060345415                               |
| 119.7697375                              | 161.347682                                        | -0.739574253                            | 0.055962141                               |
| 41.65459756                              | 88.84459209                                       | -0.609039143                            | 0.096243018                               |
| 64.34972688                              | 124.3802109                                       | -0.142035434                            | 0.06996741                                |
| 55.15702495                              | 111.9382877                                       | -0.731929552                            | 0.081435159                               |
| 95.28522592                              | 157.4668255                                       | -0.234096205                            | 0.05751406                                |
| 44.98986905                              | 119.4719658                                       | 0.550954912                             | 0.093105141                               |
| 83.19821259                              | 130.8655796                                       | -0.665073768                            | 0.066958146                               |
| 56.83304343                              | 145.6196461                                       | 0.076317429                             | 0.070163664                               |
| 49.37732198                              | 131.518569                                        | 0.158292353                             | 0.079425334                               |
| 57.57040944                              | 120.6688423                                       | -0.209598204                            | 0.076619296                               |
| 54.48461283                              | 166.6619415                                       | 0.588238953                             | 0.102900702                               |
| 84.89279889                              | 152.0445213                                       | 0.157963302                             | 0.059838306                               |
| 58.92528459                              | 115.1280189                                       | -0.700641903                            | 0.076493303                               |
| 51.60096316                              | 122.1703291                                       | -0.088380753                            | 0.076658219                               |
| 50.66578391                              | 124.1930784                                       | -0.208899441                            | 0.07542657                                |
| 93.341553                                | 144.2008481                                       | -0.263987598                            | 0.067179364                               |
| 85.07313936                              | 147.2914133                                       | -0.085124698                            | 0.061295656                               |
| 71.42465122                              | 85.28593588                                       | -1.749481809                            | 0.098801415                               |
| 27.05729483                              | 90.06054211                                       | -0.167247685                            | 0.103968624                               |
| 53.41944044                              | 147.8957663                                       | 0.26293777                              | 0.070631052                               |



| log.sigma.4.5.mm.3D_firstorder_MeanAbsoluteDeviation | log.sigma.4.5.mm.3D_firstorder_Energy | log.sigma.4.5.mm.3D_firstorder_RobustMeanAbsoluteDeviation | log.sigma.4.5.mm.3D_firstorder_Median |
|------------------------------------------------------|---------------------------------------|------------------------------------------------------------|---------------------------------------|
| 105.5428104                                          | 48767177.92                           | 68.34002184                                                | 70.19613647                           |
| 65.5573537                                           | 15730872.38                           | 46.46240284                                                | 81.01057434                           |
| 90.42046297                                          | 48405946.3                            | 65.67698713                                                | 132.6580124                           |
| 100.3059487                                          | 19812986.27                           | 66.89547086                                                | 63.71099472                           |
| 73.90139762                                          | 35844034.21                           | 50.85088187                                                | 70.04881287                           |
| 89.10523799                                          | 14215983.87                           | 67.65350667                                                | 68.18789291                           |
| 88.16675554                                          | 147410291.9                           | 62.13357509                                                | 110.0950012                           |
| 85.54296023                                          | 135526556.4                           | 56.09510119                                                | 103.7903595                           |
| 90.3069128                                           | 125721057.5                           | 62.83309939                                                | 114.1452255                           |
| 86.33742692                                          | 32123960.4                            | 61.65809732                                                | 136.324585                            |
| 72.89446321                                          | 23791153.58                           | 52.82637739                                                | 84.08535767                           |
| 86.58065078                                          | 65874897.3                            | 61.31919522                                                | 121.0841675                           |
| 72.11833542                                          | 28911398.71                           | 41.71367149                                                | 59.88602448                           |
| 86.03953601                                          | 36714245.05                           | 55.04318141                                                | 79.60371399                           |
| 81.92137091                                          | 39614955.03                           | 51.34496384                                                | 91.42054367                           |
| 96.45073326                                          | 121991871.6                           | 67.71050382                                                | 117.1964226                           |
| 73.30026753                                          | 18236218.55                           | 46.68700552                                                | 93.74375534                           |
| 74.20253133                                          | 19528054.83                           | 51.41009363                                                | 59.52434158                           |
| 64.69761786                                          | 16953255.3                            | 47.64995644                                                | 66.49534607                           |
| 94.93509877                                          | 166132300.1                           | 65.79652856                                                | 126.932579                            |
| 67.33358236                                          | 52639812.17                           | 46.71773418                                                | 89.48368454                           |
| 72.89568135                                          | 18586260.55                           | 53.80098963                                                | 91.92081451                           |
| 79.70703979                                          | 21616308.65                           | 55.87538968                                                | 87.88956451                           |
| 71.71025844                                          | 47465344.17                           | 48.51097661                                                | 87.33153534                           |
| 78.56706817                                          | 30676770.05                           | 52.92046672                                                | 120.1132813                           |
| 88.48653522                                          | 63936855.76                           | 55.12834607                                                | 118.5716782                           |
| 92.59349416                                          | 87947074.42                           | 56.30264809                                                | 108.2985764                           |
| 73.03637997                                          | 45255446.3                            | 48.20484239                                                | 75.96199799                           |
| 70.99146477                                          | 7620503.98                            | 53.35437304                                                | 78.14413452                           |
| 62.67398716                                          | 37584440.83                           | 41.20129917                                                | 102.4341469                           |
| 83.98986374                                          | 120181650.6                           | 58.56516907                                                | 109.656208                            |
| 54.3105196                                           | 16098915.98                           | 31.01598264                                                | 47.25163651                           |
| 102.6883529                                          | 72216005.18                           | 68.77046536                                                | 78.9026947                            |
| 93.95059944                                          | 57944869.95                           | 61.36038023                                                | 107.3306465                           |
| 81.96174014                                          | 124625732.2                           | 57.49354946                                                | 128.9341202                           |
| 75.80463301                                          | 70336855.04                           | 53.68759214                                                | 115.6123734                           |
| 70.39156688                                          | 54222746.32                           | 39.18143538                                                | 55.95608139                           |
| 110.9147397                                          | 149273132.5                           | 76.64370619                                                | 92.30272675                           |
| 43.25635361                                          | 9874855.7                             | 30.81442955                                                | 72.62896347                           |
| 106.7120483                                          | 173435527.2                           | 74.16307733                                                | 75.42248154                           |
| 74.11780571                                          | 33889520.79                           | 43.40833172                                                | 65.08407974                           |
| 99.06246667                                          | 82165719.36                           | 66.11152788                                                | 64.7329483                            |
| 90.54537104                                          | 106968615.3                           | 61.76699046                                                | 119.9812622                           |
| 75.76391542                                          | 39547986.17                           | 50.18501097                                                | 80.33008575                           |
| 79.76702877                                          | 37962377.69                           | 56.40334482                                                | 118.1422882                           |
| 89.52185001                                          | 87832591.86                           | 61.02152103                                                | 138.0064545                           |
| 76.06131094                                          | 102312371.8                           | 51.40337628                                                | 106.2842865                           |
| 64.75103847                                          | 12539326.44                           | 48.60929044                                                | 72.28634644                           |
| 83.72966739                                          | 16439467.51                           | 58.27104414                                                | 80.2101059                            |
| 71.78768375                                          | 27550245.59                           | 53.08572918                                                | 103.198204                            |
| 91.55732178                                          | 84278076.38                           | 64.03030014                                                | 139.7325897                           |
| 93.93802846                                          | 81960767.22                           | 65.13438745                                                | 96.98390198                           |
| 76.65684618                                          | 79198610.94                           | 51.52732271                                                | 81.52791214                           |
| 79.7073749                                           | 36684811.3                            | 57.83036831                                                | 146.9443359                           |
| 92.17252835                                          | 41818914.77                           | 70.14610937                                                | 132.6341705                           |
| 69.16510306                                          | 32200563.92                           | 45.32861648                                                | 88.18725204                           |
| 94.13639244                                          | 108787900.9                           | 65.73433343                                                | 115.4592819                           |
| 81.18860999                                          | 69455374.95                           | 49.68420647                                                | 93.86485672                           |
| 60.25796865                                          | 15138491.68                           | 39.82716162                                                | 53.32075882                           |
| 85.59534005                                          | 156073556.3                           | 58.7955576                                                 | 64.80257416                           |
| 78.07986731                                          | 32699794.03                           | 52.00735795                                                | 69.40255356                           |
| 88.82250587                                          | 71394881.24                           | 64.45647111                                                | 110.052269                            |
| 88.51519964                                          | 176908708.7                           | 59.78975618                                                | 126.2178497                           |
| 89.26064903                                          | 164023276.6                           | 60.11094074                                                | 71.64244843                           |
| 69.02089117                                          | 17619534.24                           | 49.69198494                                                | 118.6849899                           |
| 81.71396886                                          | 75634797.41                           | 53.44532881                                                | 75.57509613                           |
| 47.89518572                                          | 8100220.684                           | 30.46809913                                                | 38.43460846                           |
| 87.95992789                                          | 116822448.2                           | 55.2888522                                                 | 66.27958679                           |
| 84.43557572                                          | 131288278.8                           | 55.51541351                                                | 107.1440048                           |
| 67.98888075                                          | 49937020.56                           | 49.70940688                                                | 92.12366104                           |
| 78.10909463                                          | 23677699.71                           | 51.31110651                                                | 79.62141418                           |
| 91.04855089                                          | 139813940.6                           | 61.74540341                                                | 126.7074509                           |
| 78.60924058                                          | 51799477                              | 50.10564097                                                | 112.5056992                           |
| 87.29016859                                          | 32358780.03                           | 58.30383901                                                | 51.69393158                           |
| 99.75672344                                          | 66959623.47                           | 67.69991971                                                | 58.17284393                           |
| 67.96847616                                          | 18846189.87                           | 43.57700069                                                | 84.16029739                           |
| 64.17454423                                          | 42135945.73                           | 44.18931621                                                | 105.6879463                           |
| 80.54924774                                          | 18777596.09                           | 55.06000122                                                | 66.93082047                           |
| 71.5287418                                           | 32296825.46                           | 50.58723898                                                | 94.13785553                           |
| 109.4500283                                          | 54206178                              | 68.36118483                                                | 67.27352905                           |
| 108.223101                                           | 48232750.63                           | 69.01582947                                                | 70.75809479                           |
| 65.58539588                                          | 18721259.74                           | 38.7521095                                                 | 47.86157608                           |
| 84.19014992                                          | 79088931.09                           | 54.02958974                                                | 110.9176025                           |
| 72.86863455                                          | 48884451.77                           | 47.11234935                                                | 89.84285736                           |
| 100.3381097                                          | 63973329.17                           | 66.79454236                                                | 101.9940796                           |
| 71.56604294                                          | 27275350.58                           | 50.48792187                                                | 76.63046265                           |
| 91.17748537                                          | 38311832.85                           | 57.60939125                                                | 50.43408585                           |
| 84.33318712                                          | 79944055.67                           | 59.40641955                                                | 122.7614632                           |
| 74.52023396                                          | 29229905.25                           | 52.44951799                                                | 95.60486603                           |
| 77.4014188                                           | 40726282.28                           | 50.5590598                                                 | 94.59480286                           |
| 85.80590492                                          | 26688291.66                           | 68.8427012                                                 | 64.62216568                           |
| 96.33469473                                          | 69852845.76                           | 66.48335162                                                | 115.8087425                           |
| 77.40606289                                          | 77991566.52                           | 49.34691112                                                | 70.40546417                           |
| 75.38982711                                          | 73846568.11                           | 50.60839376                                                | 109.345623                            |
| 75.24923723                                          | 53758839.18                           | 51.88838114                                                | 61.93739128                           |
| 96.07123895                                          | 88470104.84                           | 63.41453817                                                | 81.7780838                            |
| 94.00446689                                          | 59437205.85                           | 63.03994635                                                | 84.63600922                           |
| 74.15918294                                          | 13101319.58                           | 39.13835396                                                | 32.10798264                           |
| 54.41046562                                          | 7956917.173                           | 37.24039376                                                | 69.30648041                           |
| 82.33231588                                          | 143272220.2                           | 60.01626495                                                | 111.8166046                           |

| log.sigma.4.5.mm.3D_firstorder_TotalEnergy | log.sigma.4.5.mm.3D_firstorder_Maximum | log.sigma.4.5.mm.3D_firstorder_RootMeanSquared | log.sigma.4.5.mm.3D_firstorder_90Percentile | log.sigma.4.5.mm.3D_firstorder_Minimum |
|--------------------------------------------|----------------------------------------|------------------------------------------------|---------------------------------------------|----------------------------------------|
| 1316713804                                 | 416.0115662                            | 151.5971799                                    | 228.7772903                                 | -458.0352783                           |
| 424733554.3                                | 329.2341919                            | 129.7091456                                    | 227.1416382                                 | -64.86199951                           |
| 1306960550                                 | 430.0438232                            | 177.6383283                                    | 292.2236664                                 | -169.150177                            |
| 534950629.4                                | 334.8364868                            | 142.4058031                                    | 223.5243774                                 | -303.4861145                           |
| 967788923.7                                | 368.4595947                            | 123.0318608                                    | 211.0528259                                 | -230.6526642                           |
| 383831564.5                                | 428.6340332                            | 146.7629705                                    | 253.3037064                                 | -113.4404526                           |
| 3980077882                                 | 597.3411255                            | 161.5106814                                    | 264.9924927                                 | -233.2823029                           |
| 3659217022                                 | 466.7347412                            | 162.8871248                                    | 276.2775238                                 | -420.2236938                           |
| 3394468553                                 | 468.9552917                            | 166.2988696                                    | 276.7495117                                 | -304.1222229                           |
| 867346930.9                                | 376.3677673                            | 173.1080038                                    | 278.9042999                                 | -401.0393677                           |
| 642361146.6                                | 356.9253235                            | 125.6050439                                    | 209.7067245                                 | -173.7235107                           |
| 1778622227                                 | 453.0729065                            | 169.0536339                                    | 273.5094055                                 | -237.7575989                           |
| 780607765.2                                | 377.469635                             | 124.4406848                                    | 215.5734222                                 | -272.1108093                           |
| 991284616.5                                | 406.7745972                            | 146.2285433                                    | 246.2309235                                 | -325.5881958                           |
| 1069603786                                 | 468.5184021                            | 141.305397                                     | 221.3176697                                 | -270.7718811                           |
| 3293780533                                 | 450.5516968                            | 166.9655185                                    | 270.7868805                                 | -261.5701294                           |
| 492377900.8                                | 288.5065002                            | 123.5848488                                    | 183.5731628                                 | -301.645874                            |
| 527257480.4                                | 341.3527832                            | 125.8484742                                    | 233.633432                                  | -125.9608688                           |
| 457737893.1                                | 298.1114197                            | 114.2849927                                    | 201.9175201                                 | -90.24947357                           |
| 4485572102                                 | 566.7073975                            | 178.7586764                                    | 291.3918945                                 | -228.9749451                           |
| 1421274929                                 | 392.4867859                            | 131.9368989                                    | 222.0647339                                 | -193.2441864                           |
| 501829035                                  | 339.2621155                            | 131.2457619                                    | 221.5985168                                 | -125.7929153                           |
| 583640333.5                                | 359.4197998                            | 145.2916942                                    | 255.6799271                                 | -125.1184311                           |
| 1281564293                                 | 455.9589233                            | 133.9094871                                    | 224.4186554                                 | -224.0565491                           |
| 828272791.4                                | 419.1125183                            | 155.2353459                                    | 244.2262268                                 | -321.3527527                           |
| 1726295106                                 | 494.2580872                            | 164.2831824                                    | 255.8561218                                 | -375.8087463                           |
| 2374571009                                 | 548.7109375                            | 164.9331093                                    | 254.7702087                                 | -468.0666199                           |
| 1221897050                                 | 356.5928955                            | 128.0040141                                    | 219.6855606                                 | -266.6333008                           |
| 205753607.5                                | 308.6750183                            | 130.568401                                     | 228.2177368                                 | -79.76260376                           |
| 1014779902                                 | 372.042572                             | 135.2707279                                    | 219.633725                                  | -217.6803131                           |
| 3244904567                                 | 471.2364197                            | 158.9303586                                    | 263.6710693                                 | -344.1262817                           |
| 434670731.4                                | 256.4736938                            | 88.21005067                                    | 115.983963                                  | -376.878479                            |
| 1949832140                                 | 485.4312134                            | 149.5487226                                    | 233.2751953                                 | -348.0844421                           |
| 1564511489                                 | 473.8337708                            | 157.0267221                                    | 243.5644714                                 | -343.4317932                           |
| 3364894769                                 | 415.9898071                            | 168.2209984                                    | 272.033255                                  | -320.7966309                           |
| 1899095086                                 | 368.5115356                            | 153.1451474                                    | 245.9940491                                 | -303.0427551                           |
| 1464014151                                 | 417.1428833                            | 120.7149115                                    | 173.5709991                                 | -508.9277954                           |
| 4030374576                                 | 546.7634277                            | 170.0685049                                    | 277.4971008                                 | -430.8673401                           |
| 266621103.9                                | 228.9889679                            | 89.6009312                                     | 140.8022522                                 | -104.9578934                           |
| 4682759233                                 | 497.302063                             | 154.4549485                                    | 253.2678009                                 | -290.4920349                           |
| 915017061.4                                | 363.3654175                            | 114.3003942                                    | 152.071312                                  | -427.5804749                           |
| 2218474423                                 | 629.5033569                            | 145.7666741                                    | 227.2131104                                 | -335.3760376                           |
| 2888152614                                 | 453.4786682                            | 171.1210163                                    | 279.5172729                                 | -286.3877563                           |
| 1067795627                                 | 550.2243652                            | 126.0773288                                    | 200.8833115                                 | -257.107605                            |
| 1024984198                                 | 466.0767517                            | 172.3499953                                    | 294.7707581                                 | -98.68871307                           |
| 2371479980                                 | 512.2658081                            | 178.8778947                                    | 278.417218                                  | -307.3454895                           |
| 2762434039                                 | 455.1712341                            | 149.7567601                                    | 245.2132797                                 | -274.1192017                           |
| 338561813.8                                | 279.4656607                            | 119.9852959                                    | 209.8562775                                 | -57.25897217                           |
| 443865622.7                                | 392.9531555                            | 138.988572                                     | 229.0434418                                 | -199.7854767                           |
| 743856630.9                                | 445.7004089                            | 142.7494329                                    | 230.4090988                                 | -88.99720001                           |
| 2275508062                                 | 438.0302429                            | 181.1236889                                    | 285.4100586                                 | -248.2158356                           |
| 2212940715                                 | 510.7387085                            | 155.9278287                                    | 263.6655884                                 | -254.2705078                           |
| 2138362495                                 | 420.0804749                            | 132.4872961                                    | 225.8518005                                 | -231.1714935                           |
| 990489905.1                                | 419.0244751                            | 182.2882216                                    | 284.5174713                                 | -153.8675842                           |
| 1129110699                                 | 459.059834                             | 177.321158                                     | 289.5754608                                 | -121.209465                            |
| 869415225.9                                | 399.7754822                            | 128.5033451                                    | 215.2673157                                 | -358.6741333                           |
| 2937273323                                 | 467.6795044                            | 163.9951617                                    | 265.7182861                                 | -285.4328918                           |
| 1875295124                                 | 358.2970276                            | 141.7230322                                    | 218.7659592                                 | -408.9160156                           |
| 408739275.4                                | 287.7437439                            | 95.84350766                                    | 152.6060852                                 | -300.4606628                           |
| 4213986020                                 | 467.6376343                            | 130.7534207                                    | 210.518512                                  | -366.6465149                           |
| 882894438.8                                | 496.7828979                            | 136.074629                                     | 237.7023621                                 | -201.7462463                           |
| 1927661793                                 | 457.9127808                            | 163.5226464                                    | 271.7167633                                 | -238.7700958                           |
| 4776535134                                 | 552.8416138                            | 174.81264                                      | 279.0305298                                 | -463.645813                            |
| 4428628468                                 | 506.0218506                            | 146.6863769                                    | 262.1727966                                 | -347.8343201                           |
| 475727424.4                                | 391.6705627                            | 149.3425857                                    | 226.4681183                                 | -171.0013885                           |
| 2042139530                                 | 467.5111694                            | 139.9441309                                    | 234.8980545                                 | -404.4831238                           |
| 218705958.5                                | 272.8798828                            | 78.8151361                                     | 128.1249031                                 | -241.1620483                           |
| 3154206103                                 | 515.4616699                            | 136.7171961                                    | 223.4485062                                 | -404.8582153                           |
| 3544783528                                 | 454.6617737                            | 149.7184648                                    | 235.5296783                                 | -351.4198303                           |
| 1348299555                                 | 330.0339355                            | 131.2689837                                    | 216.4615082                                 | -217.8219757                           |
| 639297892                                  | 397.7933655                            | 135.0097642                                    | 211.767868                                  | -328.9636841                           |
| 3774976398                                 | 477.0186768                            | 180.5288402                                    | 298.0392517                                 | -352.3033142                           |
| 1398585879                                 | 371.1397705                            | 150.7615261                                    | 236.4432831                                 | -385.5265503                           |
| 873687060.8                                | 345.8043213                            | 119.6845123                                    | 173.0749298                                 | -338.0764771                           |
| 1807909834                                 | 494.8391113                            | 146.2395923                                    | 251.9821167                                 | -276.4386292                           |
| 508847126.5                                | 306.2490234                            | 118.5046858                                    | 185.9146088                                 | -309.0765686                           |
| 1137670535                                 | 377.3969116                            | 132.6120431                                    | 208.8383255                                 | -200.3316498                           |
| 506995094.3                                | 431.5308533                            | 140.0029678                                    | 244.3919571                                 | -137.1973877                           |
| 872014287.3                                | 362.394043                             | 137.5508117                                    | 230.2817444                                 | -185.9494781                           |
| 1463566806                                 | 429.1136475                            | 152.2331671                                    | 186.5188446                                 | -506.4660034                           |
| 1302284267                                 | 416.0115662                            | 155.7233089                                    | 228.50177                                   | -479.1218262                           |
| 505474013                                  | 430.7936401                            | 102.0121622                                    | 140.2341675                                 | -370.8121033                           |
| 2135401139                                 | 449.3048096                            | 155.5429719                                    | 247.450827                                  | -329.2810974                           |
| 1319880198                                 | 372.2258606                            | 126.1258466                                    | 192.0099182                                 | -313.4000244                           |
| 1727279888                                 | 540.6500854                            | 161.9547074                                    | 259.2636353                                 | -338.109375                            |
| 736434465.5                                | 356.4274902                            | 133.4307073                                    | 240.8391891                                 | -161.8862915                           |
| 1034419487                                 | 348.87323                              | 126.742501                                     | 177.3196045                                 | -396.3821106                           |
| 2158489503                                 | 496.3628235                            | 170.7494695                                    | 275.3013306                                 | -311.4160461                           |
| 789207441.8                                | 382.2113037                            | 141.3003265                                    | 235.8006744                                 | -169.6658478                           |
| 1099609622                                 | 408.1817017                            | 141.8158818                                    | 231.7321472                                 | -250.9870605                           |
| 720583874.7                                | 338.3457336                            | 143.0611105                                    | 256.7253204                                 | -106.9486008                           |
| 1886026835                                 | 493.9201965                            | 171.2462907                                    | 287.7753815                                 | -219.7585754                           |
| 2105772296                                 | 383.0232849                            | 122.6685459                                    | 188.0968414                                 | -452.6373596                           |
| 1993857339                                 | 437.2352905                            | 149.591938                                     | 241.0222824                                 | -274.4963989                           |
| 1451488658                                 | 402.8052979                            | 111.1425861                                    | 174.4458527                                 | -294.029541                            |
| 2388692831                                 | 456.9559937                            | 160.7897161                                    | 276.1768677                                 | -504.0130005                           |
| 1604804558                                 | 432.9137268                            | 145.2565647                                    | 233.5240662                                 | -251.3134613                           |
| 353735628.6                                | 237.6450653                            | 111.862412                                     | 118.3364029                                 | -467.524231                            |
| 214836763.7                                | 246.7391357                            | 97.67634347                                    | 157.4253983                                 | -165.2120361                           |
| 3868349944                                 | 436.6948547                            | 157.5225036                                    | 258.0964325                                 | -207.0066833                           |

| log.sigma.4.5.mm.3D_firstorder_Entropy | log.sigma.4.5.mm.3D_firstorder_StandardDeviation | log.sigma.4.5.mm.3D_firstorder_Range | log.sigma.4.5.mm.3D_firstorder_Variance | log.sigma.4.5.mm.3D_firstorder_10Percentile |
|----------------------------------------|--------------------------------------------------|--------------------------------------|-----------------------------------------|---------------------------------------------|
| 4.45850998                             | 139.023429                                       | 874.0468445                          | 19327.51382                             | -125.1783966                                |
| 3.583314012                            | 80.70780337                                      | 394.0961914                          | 6513.749526                             | -11.73737946                                |
| 4.154462835                            | 110.425244                                       | 599.1940002                          | 12193.73452                             | 1.3730178                                   |
| 4.309049532                            | 129.7927399                                      | 638.3226013                          | 16846.15533                             | -132.7078522                                |
| 3.919854316                            | 93.25990625                                      | 599.1122589                          | 8697.410113                             | -32.54700127                                |
| 3.917388334                            | 104.360097                                       | 542.0744858                          | 10891.02984                             | -13.23243265                                |
| 4.165115593                            | 110.2671383                                      | 830.6234283                          | 12158.8418                              | -15.81667709                                |
| 4.127574382                            | 112.3215098                                      | 886.9584351                          | 12616.12156                             | 2.147080302                                 |
| 4.213440652                            | 113.7251817                                      | 773.0775146                          | 12933.41695                             | -20.29279423                                |
| 4.078475514                            | 108.9600124                                      | 777.407135                           | 11872.28429                             | 6.629126692                                 |
| 3.869401506                            | 89.72254864                                      | 530.6488342                          | 8050.135734                             | -21.58185024                                |
| 4.118943527                            | 107.9765026                                      | 690.8305054                          | 11658.92512                             | 3.48105979                                  |
| 3.869908363                            | 100.5856159                                      | 649.5804443                          | 10117.46614                             | -23.55511818                                |
| 4.140838983                            | 114.3773919                                      | 732.362793                           | 13082.18778                             | -19.94028702                                |
| 4.123445339                            | 109.9864019                                      | 739.2902832                          | 12097.0086                              | -51.30708885                                |
| 4.280925099                            | 119.7992431                                      | 712.1218262                          | 14351.85865                             | -33.36553574                                |
| 3.852763577                            | 97.09646458                                      | 590.1523743                          | 9427.723434                             | -54.74915123                                |
| 3.699248429                            | 92.0134548                                       | 467.313652                           | 8466.475865                             | -10.55614128                                |
| 3.579745339                            | 78.05394313                                      | 388.3608932                          | 6092.418038                             | -7.720502521                                |
| 4.29500881                             | 119.3843196                                      | 795.6823425                          | 14252.61578                             | -11.53001595                                |
| 3.752954943                            | 84.73104303                                      | 585.7309723                          | 7179.349652                             | 6.092117786                                 |
| 3.828940992                            | 88.12462918                                      | 465.0550308                          | 7765.950269                             | -11.44972305                                |
| 3.946976377                            | 98.66437002                                      | 484.5832309                          | 9734.657912                             | -7.94259889                                 |
| 3.895425865                            | 92.08770024                                      | 680.0154724                          | 8480.144535                             | -10.16736374                                |
| 4.036995466                            | 100.9197839                                      | 740.465271                           | 10184.80278                             | -11.19503765                                |
| 4.238447907                            | 120.4616043                                      | 870.0668335                          | 14510.99811                             | -28.30756912                                |
| 4.283832956                            | 128.8266625                                      | 1016.777557                          | 16596.30896                             | -32.95368042                                |
| 3.912813151                            | 94.69509758                                      | 623.2261963                          | 8967.161506                             | -15.55701418                                |
| 3.605533102                            | 84.69667827                                      | 388.4376221                          | 7173.527311                             | 4.878196049                                 |
| 3.724911723                            | 81.65212955                                      | 589.7228851                          | 6667.07026                              | 11.5633462                                  |
| 4.098121882                            | 105.8820571                                      | 815.3627014                          | 11211.01001                             | 0.129545012                                 |
| 3.463382809                            | 79.76880914                                      | 633.3521729                          | 6363.062912                             | -44.92123795                                |
| 4.403153915                            | 132.2684419                                      | 833.5156555                          | 17494.94072                             | -125.0822311                                |
| 4.274247957                            | 122.6165741                                      | 817.265564                           | 15034.82425                             | -70.83306427                                |
| 4.064746639                            | 103.1438146                                      | 736.786438                           | 10638.64649                             | 9.095128727                                 |
| 3.925827532                            | 95.3663413                                       | 671.5542908                          | 9094.739053                             | 11.81769829                                 |
| 3.882730701                            | 106.1440788                                      | 826.9706787                          | 11266.56547                             | -33.79180145                                |
| 4.485436542                            | 139.9996288                                      | 977.6307678                          | 19599.89607                             | -80.3549881                                 |
| 3.160939256                            | 53.80523248                                      | 333.9468613                          | 2895.003042                             | 2.384846663                                 |
| 4.464193316                            | 134.0673024                                      | 787.7940979                          | 17974.04158                             | -98.36945419                                |
| 3.914803729                            | 103.622602                                       | 790.9458923                          | 10737.64365                             | -83.36530991                                |
| 4.387061207                            | 128.7764732                                      | 964.8793945                          | 16583.38006                             | -92.08606262                                |
| 4.227494773                            | 115.1467268                                      | 739.8664246                          | 13258.76868                             | -10.52970505                                |
| 3.997982023                            | 99.15941549                                      | 807.3319702                          | 9832.589681                             | -50.74059448                                |
| 3.897356843                            | 98.4900437                                       | 564.7654648                          | 9700.288707                             | 31.50392265                                 |
| 4.218982078                            | 115.2933237                                      | 819.6112976                          | 13292.55048                             | -1.72444582                                 |
| 3.989530038                            | 97.30730879                                      | 729.2904358                          | 9468.712344                             | 0.408961289                                 |
| 3.52003215                             | 76.97058011                                      | 336.7245789                          | 5924.470203                             | 3.662859678                                 |
| 4.043561129                            | 104.3994017                                      | 592.7386322                          | 10899.23598                             | -28.28562355                                |
| 3.757685533                            | 86.92048951                                      | 534.6976089                          | 7555.171496                             | 12.48379946                                 |
| 4.227123649                            | 114.7130981                                      | 686.2460785                          | 13159.09489                             | 1.763445163                                 |
| 4.274858164                            | 118.3703194                                      | 765.0092163                          | 14011.53251                             | -48.00474167                                |
| 4.003537384                            | 98.53765939                                      | 651.2519684                          | 9709.670319                             | -29.12307606                                |
| 3.974948298                            | 97.30818281                                      | 572.8920593                          | 9468.882442                             | 34.82438087                                 |
| 4.101929848                            | 109.1248338                                      | 580.2674484                          | 11908.22936                             | 5.428563404                                 |
| 3.872542828                            | 90.97931217                                      | 758.4496155                          | 8277.235243                             | -17.83026581                                |
| 4.274706083                            | 117.8117432                                      | 753.1123962                          | 13879.60684                             | -35.42006836                                |
| 4.07516754                             | 112.413075                                       | 767.2130432                          | 12636.69943                             | -38.59388924                                |
| 3.68334891                             | 79.09803664                                      | 588.2044067                          | 6256.4994                               | -39.14132042                                |
| 4.13519185                             | 108.6501467                                      | 834.2841492                          | 11804.85437                             | -50.45595856                                |
| 3.898974625                            | 99.67036409                                      | 698.5291443                          | 9934.181477                             | -14.27500439                                |
| 4.134034321                            | 109.2057728                                      | 696.6828766                          | 11925.90082                             | -7.621807528                                |
| 4.209757282                            | 114.7187773                                      | 1016.487427                          | 13160.39786                             | -10.316624367                               |
| 4.151702204                            | 114.5722367                                      | 853.8561707                          | 13126.79743                             | -33.44700699                                |
| 3.78063702                             | 84.97826826                                      | 562.6719513                          | 7221.306076                             | 14.29432297                                 |
| 4.051138122                            | 107.507608                                       | 811.9942932                          | 11557.88579                             | -14.05453939                                |
| 3.332108447                            | 64.57010535                                      | 514.0419312                          | 4169.298505                             | -25.93628807                                |
| 4.242482883                            | 118.7800249                                      | 920.3198853                          | 14108.69432                             | -70.86984024                                |
| 4.14207054                             | 110.490147                                       | 806.081604                           | 12208.07258                             | -38.29023132                                |
| 3.73899852                             | 83.15594639                                      | 547.8559113                          | 6914.91142                              | 3.948801851                                 |
| 3.97885111                             | 104.7062309                                      | 726.7570496                          | 10963.39479                             | -19.76610413                                |
| 4.223563563                            | 116.8975493                                      | 829.321991                           | 13665.03703                             | 11.07128096                                 |
| 4.029198973                            | 105.7962269                                      | 756.6663208                          | 11192.84164                             | -8.990043449                                |
| 4.169074812                            | 112.1899231                                      | 683.8807983                          | 12586.57885                             | -106.2221375                                |
| 4.352645979                            | 127.3535654                                      | 771.2777405                          | 16218.93062                             | -80.5779953                                 |
| 3.817356039                            | 90.81392315                                      | 615.325592                           | 8247.168637                             | -38.2295208                                 |
| 3.73142542                             | 81.26396031                                      | 577.7285614                          | 6603.831246                             | 8.060821772                                 |
| 3.84676496                             | 100.3623049                                      | 568.728241                           | 10072.59225                             | -2.751912427                                |
| 3.835940775                            | 88.80017229                                      | 548.3435211                          | 7885.470598                             | 2.244172573                                 |
| 4.418113852                            | 146.7117216                                      | 935.5796509                          | 21524.32925                             | -164.2798645                                |
| 4.484338371                            | 144.4020259                                      | 895.1333923                          | 20851.94508                             | -131.4132141                                |
| 3.806215804                            | 93.16590743                                      | 801.6057434                          | 8679.886307                             | -63.95999603                                |
| 4.158326915                            | 110.9520802                                      | 778.585907                           | 12310.36411                             | -25.92279396                                |
| 3.928946643                            | 96.87317148                                      | 685.625885                           | 9384.411353                             | -37.79592667                                |
| 4.392335531                            | 129.7670001                                      | 878.7594604                          | 16839.4743                              | -72.54081726                                |
| 3.712851187                            | 88.47365179                                      | 518.3137817                          | 7827.587061                             | 8.35245671                                  |
| 4.233961882                            | 121.4481373                                      | 745.2553406                          | 14749.65006                             | -135.6933838                                |
| 4.086965153                            | 105.3928359                                      | 807.7788696                          | 11107.64987                             | 10.92617321                                 |
| 3.898419614                            | 93.00742184                                      | 551.8771515                          | 8650.380517                             | -5.659340906                                |
| 4.021928631                            | 101.619949                                       | 659.1687622                          | 10326.61403                             | -16.42061539                                |
| 3.586779205                            | 97.50794183                                      | 445.2943344                          | 9507.798719                             | 3.613143277                                 |
| 4.300902958                            | 121.3649867                                      | 713.678772                           | 14729.45999                             | -30.61685066                                |
| 4.040921971                            | 104.1264607                                      | 835.6606445                          | 10842.31981                             | -65.18497314                                |
| 3.989907727                            | 97.53913343                                      | 711.7316895                          | 9513.88255                              | -4.413369751                                |
| 3.969414586                            | 95.18177883                                      | 696.8348389                          | 9059.571022                             | -69.78728256                                |
| 4.259996103                            | 127.1897119                                      | 960.9689941                          | 16177.22282                             | -26.61294765                                |
| 4.283970358                            | 120.8139724                                      | 684.2271881                          | 14596.01592                             | -86.33413849                                |
| 3.803161868                            | 110.9724388                                      | 705.1692963                          | 12314.88217                             | -115.3249573                                |
| 3.496203941                            | 68.84122937                                      | 411.9511719                          | 4739.114861                             | -17.2193819                                 |
| 4.022047416                            | 100.4957883                                      | 643.7015381                          | 10099.40347                             | 4.160091352                                 |

| log.sigma.4.5.mm.3D_firstorder_Kurtosis | log.sigma.4.5.mm.3D_firstorder_Mean | log.sigma.4.5.mm.3D_glrIm_ShortRunLowGrayLevelEmphasis | log.sigma.4.5.mm.3D_glrIm_GrayLevelVariance |
|-----------------------------------------|-------------------------------------|--------------------------------------------------------|---------------------------------------------|
| 3.62686797                              | 60.44990597                         | 0.004167587                                            | 32.19496662                                 |
| 2.60728112                              | 101.5416807                         | 0.035763251                                            | 10.77153563                                 |
| 2.550161995                             | 139.1461144                         | 0.010564598                                            | 19.53013754                                 |
| 2.956921116                             | 58.59400511                         | 0.009831469                                            | 17.62003598                                 |
| 2.959245329                             | 80.24605074                         | 0.007192696                                            | 14.42465541                                 |
| 2.418910575                             | 103.1907925                         | 0.021590674                                            | 17.97324308                                 |
| 3.290238339                             | 118.0121113                         | 0.00593616                                             | 19.82107291                                 |
| 4.031393607                             | 117.9664947                         | 0.00273213                                             | 21.3009844                                  |
| 3.075228901                             | 121.3338249                         | 0.003987703                                            | 21.15372261                                 |
| 4.292475167                             | 134.5142992                         | 0.003263814                                            | 19.62388835                                 |
| 2.674465117                             | 87.9004625                          | 0.015502352                                            | 13.13727104                                 |
| 2.977285793                             | 130.0776923                         | 0.006347946                                            | 19.00131006                                 |
| 4.370930799                             | 73.26675855                         | 0.010414058                                            | 17.77156757                                 |
| 3.969631211                             | 91.10762367                         | 0.005119952                                            | 22.48688901                                 |
| 3.852771405                             | 88.7141851                          | 0.008823213                                            | 20.12743016                                 |
| 2.887789306                             | 116.2997236                         | 0.006406382                                            | 23.18290141                                 |
| 4.404387317                             | 76.45581358                         | 0.006341529                                            | 15.61259998                                 |
| 2.828272787                             | 85.85663983                         | 0.014375589                                            | 14.34580264                                 |
| 2.36668425                              | 83.47838952                         | 0.029733933                                            | 9.967082881                                 |
| 2.957314389                             | 133.0490458                         | 0.005953067                                            | 23.49633642                                 |
| 3.053713851                             | 101.1335535                         | 0.008993782                                            | 12.06697827                                 |
| 2.46930406                              | 97.25995957                         | 0.015345528                                            | 12.44021981                                 |
| 2.659864267                             | 106.6537318                         | 0.015589108                                            | 16.11984838                                 |
| 3.472987677                             | 97.21937149                         | 0.007947422                                            | 14.22081678                                 |
| 3.576617422                             | 117.9542701                         | 0.004479481                                            | 16.8659767                                  |
| 4.530366588                             | 111.704816                          | 0.003926216                                            | 24.29771189                                 |
| 5.355768169                             | 102.9884536                         | 0.003157214                                            | 27.76898108                                 |
| 3.436257479                             | 86.12703477                         | 0.006566626                                            | 14.98122361                                 |
| 2.40081087                              | 99.37092143                         | 0.021133922                                            | 11.56846076                                 |
| 3.430329833                             | 107.8475756                         | 0.006546689                                            | 11.31877816                                 |
| 3.318346378                             | 118.5236216                         | 0.00334374                                             | 18.62762047                                 |
| 7.74332328                              | 37.65567855                         | 0.004638176                                            | 11.36138133                                 |
| 3.068900272                             | 69.78452342                         | 0.007416414                                            | 28.79670264                                 |
| 3.650937719                             | 98.09468495                         | 0.006475259                                            | 24.67287892                                 |
| 3.358237364                             | 132.8896453                         | 0.003755818                                            | 17.37691093                                 |
| 3.582278511                             | 119.827781                          | 0.003995124                                            | 15.00604619                                 |
| 7.672804125                             | 57.49368988                         | 0.002650016                                            | 20.04238393                                 |
| 3.181090149                             | 96.55775616                         | 0.002787164                                            | 32.73697284                                 |
| 2.939451383                             | 71.64729531                         | 0.018820424                                            | 4.910148397                                 |
| 2.852971025                             | 76.69608546                         | 0.008545996                                            | 29.27761799                                 |
| 5.613443459                             | 48.23832973                         | 0.003781926                                            | 18.52915252                                 |
| 3.735461851                             | 68.29746138                         | 0.005306116                                            | 27.14670706                                 |
| 3.12621313                              | 126.5844917                         | 0.005062503                                            | 21.63717086                                 |
| 3.766145576                             | 77.86464636                         | 0.00747127                                             | 16.37561289                                 |
| 2.819677609                             | 141.4363185                         | 0.015931916                                            | 16.12233124                                 |
| 3.73789563                              | 136.7653127                         | 0.004459769                                            | 22.07392055                                 |
| 3.360447355                             | 113.8348578                         | 0.00504411                                             | 15.93400258                                 |
| 2.278322601                             | 92.04347355                         | 0.034403187                                            | 9.703882812                                 |
| 3.035033613                             | 91.75286416                         | 0.013888517                                            | 17.97203899                                 |
| 3.029928911                             | 113.235282                          | 0.020506876                                            | 12.41740333                                 |
| 3.081135401                             | 140.1666717                         | 0.008405272                                            | 21.65205529                                 |
| 2.847644596                             | 101.498548                          | 0.006100671                                            | 22.73637423                                 |
| 3.169872991                             | 88.56191795                         | 0.007056118                                            | 16.16677321                                 |
| 2.674951435                             | 154.1431585                         | 0.008082016                                            | 15.43094714                                 |
| 2.268586905                             | 139.7661035                         | 0.014784295                                            | 19.15816299                                 |
| 3.886277804                             | 90.75171878                         | 0.003621924                                            | 13.88586513                                 |
| 2.957000222                             | 114.0824537                         | 0.005360454                                            | 22.84276827                                 |
| 5.404866271                             | 86.30595823                         | 0.003908891                                            | 21.40158711                                 |
| 4.121825005                             | 54.12465761                         | 0.005673261                                            | 10.87358669                                 |
| 3.561626772                             | 72.74340289                         | 0.003638012                                            | 19.67557081                                 |
| 3.547766822                             | 92.63974947                         | 0.007497001                                            | 16.84128421                                 |
| 2.787293246                             | 121.7117705                         | 0.006540744                                            | 19.50063577                                 |
| 4.208634731                             | 131.9055012                         | 0.002130348                                            | 21.69832564                                 |
| 3.413490356                             | 91.59746574                         | 0.004004613                                            | 21.8709904                                  |
| 2.978564988                             | 122.8083947                         | 0.009519255                                            | 12.0698903                                  |
| 4.237391002                             | 89.59059091                         | 0.002868506                                            | 19.87688659                                 |
| 4.722688859                             | 45.19432678                         | 0.008458113                                            | 7.450112474                                 |
| 4.017507415                             | 67.69710035                         | 0.003544427                                            | 23.73799925                                 |
| 3.716438947                             | 101.0324014                         | 0.003558804                                            | 20.57479064                                 |
| 2.837079215                             | 101.5708357                         | 0.007326459                                            | 11.44302436                                 |
| 4.676689148                             | 85.23052052                         | 0.00641018                                             | 18.55269341                                 |
| 3.563630749                             | 137.570437                          | 0.003013797                                            | 22.82368324                                 |
| 4.901673556                             | 107.4066856                         | 0.003905995                                            | 19.00598598                                 |
| 3.39031428                              | 41.68697201                         | 0.007474784                                            | 20.75164958                                 |
| 3.028283014                             | 71.88245776                         | 0.006918585                                            | 26.52487641                                 |
| 4.335410899                             | 76.13272569                         | 0.005738889                                            | 13.87882401                                 |
| 3.477609781                             | 104.7956236                         | 0.007229182                                            | 11.19386838                                 |
| 3.435631671                             | 97.61269761                         | 0.016170493                                            | 17.07634776                                 |
| 2.800969865                             | 105.0464431                         | 0.008479861                                            | 12.9552671                                  |
| 4.470336838                             | 40.62767414                         | 0.004181641                                            | 35.2981492                                  |
| 4.019377287                             | 58.29068413                         | 0.004192792                                            | 34.59845353                                 |
| 6.014335866                             | 41.55231555                         | 0.006720496                                            | 15.26988641                                 |
| 3.677459555                             | 109.0103298                         | 0.003796093                                            | 20.55480604                                 |
| 4.506893094                             | 80.76705905                         | 0.005626594                                            | 15.57663399                                 |
| 3.407231716                             | 96.9012536                          | 0.00590776                                             | 27.68892342                                 |
| 2.716485476                             | 99.8807618                          | 0.009928494                                            | 13.05709867                                 |
| 3.727339542                             | 36.24929665                         | 0.006413905                                            | 24.71210927                                 |
| 3.204443083                             | 134.3418456                         | 0.003666226                                            | 18.47331092                                 |
| 2.806128153                             | 106.3738772                         | 0.012953864                                            | 14.23888265                                 |
| 3.64819154                              | 98.91981754                         | 0.00700499                                             | 17.68034875                                 |
| 1.969455934                             | 104.6837266                         | 0.013813016                                            | 15.44392917                                 |
| 2.960426344                             | 120.8132116                         | 0.009717705                                            | 23.96136888                                 |
| 4.775469267                             | 64.84791713                         | 0.002877134                                            | 18.35331298                                 |
| 3.432024674                             | 113.4189815                         | 0.005466028                                            | 15.87333991                                 |
| 3.148897275                             | 57.38556806                         | 0.006880607                                            | 14.93647434                                 |
| 4.586512833                             | 98.36722002                         | 0.002277619                                            | 27.29498779                                 |
| 2.909018525                             | 80.64399341                         | 0.008145351                                            | 24.02812776                                 |
| 6.917401195                             | 14.08250863                         | 0.007936997                                            | 21.53934469                                 |
| 3.114283625                             | 69.29324074                         | 0.014726981                                            | 7.992343772                                 |
| 2.705637248                             | 121.3010126                         | 0.006777213                                            | 16.50898912                                 |

| log.sigma.4.5.mm.3D_glrIm_LowGrayLevelRunEmphasis | log.sigma.4.5.mm.3D_glrIm_GrayLevelNonUniformityNormalized | log.sigma.4.5.mm.3D_glrIm_RunVariance | log.sigma.4.5.mm.3D_glrIm_GrayLevelNonUniformity |
|---------------------------------------------------|------------------------------------------------------------|---------------------------------------|--------------------------------------------------|
| 0.004356155                                       | 0.054212237                                                | 0.131520088                           | 104.5592956                                      |
| 0.039348734                                       | 0.095584606                                                | 0.217479687                           | 76.87011887                                      |
| 0.011330695                                       | 0.063161304                                                | 0.197455235                           | 85.14544433                                      |
| 0.010630056                                       | 0.058258513                                                | 0.149970268                           | 50.8367057                                       |
| 0.007837729                                       | 0.076414358                                                | 0.186689409                           | 157.8887812                                      |
| 0.023986025                                       | 0.07440373                                                 | 0.216034181                           | 42.60766263                                      |
| 0.006440007                                       | 0.06444832                                                 | 0.181753086                           | 322.7785872                                      |
| 0.002963761                                       | 0.069500678                                                | 0.213844836                           | 308.8149877                                      |
| 0.004315754                                       | 0.062564271                                                | 0.179456623                           | 250.2401118                                      |
| 0.003433931                                       | 0.066892938                                                | 0.157281106                           | 63.96526395                                      |
| 0.016912486                                       | 0.077080367                                                | 0.189304842                           | 101.4209961                                      |
| 0.006849723                                       | 0.06663145                                                 | 0.168675901                           | 135.8363565                                      |
| 0.011481694                                       | 0.086044163                                                | 0.335651615                           | 132.9776915                                      |
| 0.005481041                                       | 0.068385017                                                | 0.202383239                           | 102.0581105                                      |
| 0.009392987                                       | 0.070122694                                                | 0.164235256                           | 123.7796307                                      |
| 0.006895764                                       | 0.059310263                                                | 0.172549628                           | 232.9191525                                      |
| 0.006721266                                       | 0.084001894                                                | 0.15103374                            | 89.03317599                                      |
| 0.016183577                                       | 0.089521653                                                | 0.261196284                           | 92.76713936                                      |
| 0.033226753                                       | 0.092146909                                                | 0.244384177                           | 101.010425                                       |
| 0.006432276                                       | 0.058634285                                                | 0.163218083                           | 271.6555437                                      |
| 0.010066785                                       | 0.085648011                                                | 0.307512502                           | 216.716488                                       |
| 0.016967453                                       | 0.078659215                                                | 0.177421975                           | 74.63800357                                      |
| 0.017085717                                       | 0.073585462                                                | 0.217205627                           | 65.40456909                                      |
| 0.00862047                                        | 0.078898734                                                | 0.220106572                           | 181.0729671                                      |
| 0.004718497                                       | 0.0718861                                                  | 0.177736432                           | 82.19103263                                      |
| 0.004142746                                       | 0.06550803                                                 | 0.152661024                           | 139.5407845                                      |
| 0.003357146                                       | 0.064614107                                                | 0.178935211                           | 185.9649791                                      |
| 0.007139643                                       | 0.078949098                                                | 0.202017486                           | 188.893427                                       |
| 0.024152353                                       | 0.090962306                                                | 0.217307165                           | 34.96320265                                      |
| 0.007262263                                       | 0.089489623                                                | 0.247804795                           | 155.956172                                       |
| 0.003647263                                       | 0.067933573                                                | 0.226291344                           | 280.5145335                                      |
| 0.0005051801                                      | 0.11425819                                                 | 0.302729881                           | 195.9068302                                      |
| 0.007894272                                       | 0.055732911                                                | 0.15478197                            | 161.4243323                                      |
| 0.006800151                                       | 0.062469326                                                | 0.169177861                           | 131.3321823                                      |
| 0.004043711                                       | 0.068806269                                                | 0.169840959                           | 268.9348356                                      |
| 0.00434354                                        | 0.075063792                                                | 0.236989893                           | 194.7456304                                      |
| 0.002889228                                       | 0.087736637                                                | 0.279093123                           | 274.7922523                                      |
| 0.003043984                                       | 0.051180734                                                | 0.295957832                           | 227.0746567                                      |
| 0.020985888                                       | 0.126982282                                                | 0.260289174                           | 130.0968035                                      |
| 0.009271575                                       | 0.052004242                                                | 0.134989025                           | 340.9629812                                      |
| 0.004082253                                       | 0.083485075                                                | 0.24481928                            | 185.3732337                                      |
| 0.005640072                                       | 0.057440482                                                | 0.117776332                           | 202.0590738                                      |
| 0.005376163                                       | 0.062462987                                                | 0.153979438                           | 205.0053738                                      |
| 0.008001723                                       | 0.074553512                                                | 0.172159837                           | 163.6166888                                      |
| 0.017464676                                       | 0.076970286                                                | 0.19213318                            | 85.9600954                                       |
| 0.004780633                                       | 0.063262218                                                | 0.169976588                           | 154.5780501                                      |
| 0.005488564                                       | 0.073879331                                                | 0.206154597                           | 294.0570921                                      |
| 0.039058142                                       | 0.094116366                                                | 0.275096962                           | 68.9276432                                       |
| 0.015160818                                       | 0.069758608                                                | 0.188989556                           | 51.84863604                                      |
| 0.022915087                                       | 0.082018888                                                | 0.262827574                           | 94.55769065                                      |
| 0.008998808                                       | 0.061294521                                                | 0.153377282                           | 141.0719911                                      |
| 0.006497921                                       | 0.059569452                                                | 0.123062215                           | 182.5487332                                      |
| 0.007691679                                       | 0.073270103                                                | 0.195589391                           | 288.007066                                       |
| 0.008632072                                       | 0.071695447                                                | 0.151663378                           | 70.85563651                                      |
| 0.016098524                                       | 0.063735957                                                | 0.172146656                           | 75.10325851                                      |
| 0.003913419                                       | 0.081431203                                                | 0.198688333                           | 138.3663978                                      |
| 0.005689276                                       | 0.059142794                                                | 0.146301712                           | 215.7104491                                      |
| 0.004202839                                       | 0.073072155                                                | 0.217787001                           | 119.2934742                                      |
| 0.006117586                                       | 0.09160552                                                 | 0.208343584                           | 130.2333286                                      |
| 0.003999034                                       | 0.067092686                                                | 0.275731304                           | 525.4066949                                      |
| 0.00829555                                        | 0.079860492                                                | 0.23211303                            | 120.9338031                                      |
| 0.0071256                                         | 0.064541965                                                | 0.176671924                           | 151.8880407                                      |
| 0.002287783                                       | 0.064571074                                                | 0.154801353                           | 334.0357625                                      |
| 0.004399837                                       | 0.06746782                                                 | 0.209822891                           | 446.3354184                                      |
| 0.010228256                                       | 0.081725072                                                | 0.209604496                           | 56.60743893                                      |
| 0.003150989                                       | 0.07310572                                                 | 0.261493276                           | 239.9630664                                      |
| 0.009734533                                       | 0.116856585                                                | 0.409862482                           | 119.7467907                                      |
| 0.003819119                                       | 0.065275097                                                | 0.181728764                           | 359.0487555                                      |
| 0.003798773                                       | 0.066998761                                                | 0.181291672                           | 347.0583427                                      |
| 0.008125472                                       | 0.084037901                                                | 0.255443934                           | 205.5915026                                      |
| 0.006887937                                       | 0.076778299                                                | 0.209717602                           | 86.8939921                                       |
| 0.003264987                                       | 0.063321874                                                | 0.200592246                           | 237.5025232                                      |
| 0.004167955                                       | 0.073733393                                                | 0.204930844                           | 147.2937371                                      |
| 0.007933321                                       | 0.065979966                                                | 0.144284112                           | 133.6111427                                      |
| 0.007479419                                       | 0.057577602                                                | 0.165506214                           | 160.2289214                                      |
| 0.006129151                                       | 0.085102979                                                | 0.193936855                           | 99.34199994                                      |
| 0.007922314                                       | 0.087939399                                                | 0.263028804                           | 179.0158716                                      |
| 0.018275337                                       | 0.082514738                                                | 0.29115882                            | 66.34163452                                      |
| 0.009308718                                       | 0.080475335                                                | 0.202042119                           | 119.0719941                                      |
| 0.00438308                                        | 0.058772275                                                | 0.134201497                           | 124.6386775                                      |
| 0.004377989                                       | 0.053881988                                                | 0.132623611                           | 97.52860315                                      |
| 0.007278504                                       | 0.090373506                                                | 0.246228862                           | 138.1161357                                      |
| 0.004089055                                       | 0.067915198                                                | 0.231192618                           | 194.8926074                                      |
| 0.006190564                                       | 0.07955345                                                 | 0.188540261                           | 212.4403324                                      |
| 0.006333072                                       | 0.056610457                                                | 0.16737506                            | 123.2330809                                      |
| 0.011283259                                       | 0.087190109                                                | 0.29934945                            | 110.3903875                                      |
| 0.006876379                                       | 0.06457894                                                 | 0.168488118                           | 136.7610151                                      |
| 0.003951989                                       | 0.067813006                                                | 0.199577593                           | 163.1677896                                      |
| 0.014121657                                       | 0.077012941                                                | 0.212632622                           | 98.38993012                                      |
| 0.007569035                                       | 0.073426158                                                | 0.212738528                           | 128.4860507                                      |
| 0.016650587                                       | 0.089781053                                                | 0.355152029                           | 94.92045173                                      |
| 0.010450547                                       | 0.058889527                                                | 0.139282899                           | 126.457122                                       |
| 0.00308364                                        | 0.074074561                                                | 0.181841801                           | 336.7791417                                      |
| 0.005881207                                       | 0.074368697                                                | 0.183941144                           | 216.6368424                                      |
| 0.007433265                                       | 0.074397472                                                | 0.170227696                           | 285.0456016                                      |
| 0.00245491                                        | 0.063333309                                                | 0.245301681                           | 187.7376461                                      |
| 0.008857596                                       | 0.059518108                                                | 0.17953153                            | 147.7532481                                      |
| 0.0087573                                         | 0.09089915                                                 | 0.290516173                           | 78.8221165                                       |
| 0.016320387                                       | 0.102212831                                                | 0.261816924                           | 71.20099553                                      |
| 0.007352235                                       | 0.069510451                                                | 0.205795365                           | 351.9967298                                      |

| log.sigma.4.5.mm.3D_glrIm_LongRunEmphasis | log.sigma.4.5.mm.3D_glrIm_ShortRunHighGrayLevelEmphasis | log.sigma.4.5.mm.3D_glrIm_RunLengthNonUniformity | log.sigma.4.5.mm.3D_glrIm_ShortRunEmphasis |
|-------------------------------------------|---------------------------------------------------------|--------------------------------------------------|--------------------------------------------|
| 1.347030672                               | 471.6730077                                             | 1621.805264                                      | 0.932875342                                |
| 1.581860803                               | 62.78774655                                             | 615.8156374                                      | 0.895074503                                |
| 1.502559945                               | 172.4742168                                             | 1078.305766                                      | 0.911919559                                |
| 1.411540353                               | 255.3808494                                             | 709.0169786                                      | 0.918979885                                |
| 1.507385065                               | 184.0730284                                             | 1616.548497                                      | 0.904415449                                |
| 1.559032483                               | 106.5989016                                             | 447.6095849                                      | 0.902948041                                |
| 1.462091721                               | 233.8377809                                             | 4061.484703                                      | 0.917975029                                |
| 1.541785816                               | 470.6219034                                             | 3489.507744                                      | 0.906013203                                |
| 1.480631424                               | 326.7670405                                             | 3188.452237                                      | 0.910842226                                |
| 1.423174204                               | 498.6699948                                             | 781.1736582                                      | 0.920087675                                |
| 1.513058012                               | 121.6010848                                             | 1030.448263                                      | 0.903803114                                |
| 1.453353334                               | 243.7477853                                             | 1632.785018                                      | 0.913807423                                |
| 1.819799839                               | 201.7967835                                             | 1126.710445                                      | 0.875249658                                |
| 1.533736942                               | 320.2595468                                             | 1163.421017                                      | 0.903152363                                |
| 1.4388326079                              | 223.1393932                                             | 1432.600773                                      | 0.917830231                                |
| 1.428728956                               | 263.9431086                                             | 3275.147933                                      | 0.927053384                                |
| 1.425219909                               | 260.0541974                                             | 849.7291784                                      | 0.914229349                                |
| 1.690556056                               | 104.6495113                                             | 763.2460359                                      | 0.879968796                                |
| 1.663087851                               | 64.60315786                                             | 812.7879361                                      | 0.881245856                                |
| 1.428378468                               | 254.9895409                                             | 3778.097558                                      | 0.92053685                                 |
| 1.752761879                               | 152.89066                                               | 1871.23627                                       | 0.881256787                                |
| 1.477840947                               | 110.8022958                                             | 752.7752382                                      | 0.909579605                                |
| 1.556336149                               | 121.2977712                                             | 695.4975706                                      | 0.903899784                                |
| 1.560315682                               | 176.1281092                                             | 1789.736461                                      | 0.902895376                                |
| 1.436887328                               | 321.8715087                                             | 956.5081922                                      | 0.927646001                                |
| 1.397082567                               | 427.8723558                                             | 1763.235385                                      | 0.926101983                                |
| 1.449096868                               | 537.3156851                                             | 2346.245831                                      | 0.920340726                                |
| 1.543489019                               | 216.3426311                                             | 1851.121338                                      | 0.899794437                                |
| 1.584107006                               | 80.01202443                                             | 295.1403923                                      | 0.895128082                                |
| 1.652446271                               | 180.8908969                                             | 1300.988057                                      | 0.885427668                                |
| 1.563783358                               | 354.7484326                                             | 3244.01677                                       | 0.905212355                                |
| 1.783326637                               | 285.4710971                                             | 1236.028884                                      | 0.871179849                                |
| 1.404524451                               | 298.867566                                              | 2389.842764                                      | 0.924608226                                |
| 1.425450726                               | 333.5036911                                             | 1738.127414                                      | 0.925090209                                |
| 1.445748316                               | 340.9614857                                             | 3167.584676                                      | 0.917860344                                |
| 1.58055828                                | 317.2552595                                             | 2032.635                                         | 0.904414781                                |
| 1.716543884                               | 517.9973509                                             | 2326.287262                                      | 0.882162341                                |
| 1.660789165                               | 492.6864345                                             | 3481.791488                                      | 0.904510753                                |
| 1.722157144                               | 63.62039501                                             | 741.224838                                       | 0.870687774                                |
| 1.369356826                               | 252.556347                                              | 5430.149665                                      | 0.926744012                                |
| 1.627602571                               | 381.8349834                                             | 1688.944272                                      | 0.892846258                                |
| 1.330295202                               | 303.4658328                                             | 2952.604262                                      | 0.932024313                                |
| 1.403641238                               | 304.4218548                                             | 2719.509107                                      | 0.925626613                                |
| 1.464617121                               | 207.439527                                              | 1751.281668                                      | 0.911995848                                |
| 1.513244219                               | 111.8106622                                             | 874.9620708                                      | 0.904737807                                |
| 1.438858909                               | 350.2898636                                             | 1989.897919                                      | 0.919906903                                |
| 1.528633552                               | 249.9194255                                             | 3137.64509                                       | 0.906850331                                |
| 1.71371276                                | 56.3145482                                              | 541.6432188                                      | 0.8803423                                  |
| 1.511439552                               | 153.2048424                                             | 584.0083737                                      | 0.90521831                                 |
| 1.668309602                               | 87.68726595                                             | 884.9833695                                      | 0.892042661                                |
| 1.404048876                               | 258.6491818                                             | 1889.327707                                      | 0.923367852                                |
| 1.336518496                               | 247.3766071                                             | 2573.351953                                      | 0.932483531                                |
| 1.520015132                               | 193.4973647                                             | 3074.863972                                      | 0.904324519                                |
| 1.407685213                               | 186.952302                                              | 811.1566709                                      | 0.922304526                                |
| 1.453142436                               | 132.3268873                                             | 950.0691324                                      | 0.916039521                                |
| 1.524104867                               | 343.2873963                                             | 1327.149434                                      | 0.903629168                                |
| 1.382144988                               | 290.5082923                                             | 3031.536617                                      | 0.927946898                                |
| 1.556641861                               | 410.4338826                                             | 2338.423143                                      | 0.902441556                                |
| 1.56182547                                | 227.7257665                                             | 1089.041197                                      | 0.896145574                                |
| 1.645572739                               | 325.4381881                                             | 6064.627612                                      | 0.899821706                                |
| 1.605816945                               | 176.2655168                                             | 1155.62315                                       | 0.894370408                                |
| 1.470786785                               | 235.0407791                                             | 1877.382729                                      | 0.912027252                                |
| 1.411592154                               | 587.2249449                                             | 4234.203206                                      | 0.922225927                                |
| 1.546772088                               | 325.3966262                                             | 5163.197218                                      | 0.903033304                                |
| 1.541254888                               | 149.2923719                                             | 553.1402461                                      | 0.908086707                                |
| 1.657545367                               | 420.5620342                                             | 2481.793438                                      | 0.89086905                                 |
| 2.06556644                                | 133.6187709                                             | 672.646079                                       | 0.833210513                                |
| 1.479519291                               | 394.2960398                                             | 4382.288129                                      | 0.911586648                                |
| 1.466755305                               | 363.7819138                                             | 4173.763089                                      | 0.915928183                                |
| 1.670977824                               | 175.7038767                                             | 1822.530931                                      | 0.884304419                                |
| 1.544628095                               | 306.7632018                                             | 891.7832143                                      | 0.905134964                                |
| 1.516869165                               | 425.6131117                                             | 2966.170628                                      | 0.908457387                                |
| 1.519128585                               | 408.4241065                                             | 1586.668745                                      | 0.909798008                                |
| 1.394793013                               | 256.9154405                                             | 1659.140021                                      | 0.922407761                                |
| 1.438857405                               | 244.4828145                                             | 2255.926452                                      | 0.917931262                                |
| 1.528906611                               | 253.7887818                                             | 909.704927                                       | 0.901344035                                |
| 1.665322023                               | 177.2046761                                             | 1543.610019                                      | 0.890652748                                |
| 1.740033161                               | 116.9987042                                             | 595.8708074                                      | 0.880304969                                |
| 1.541615945                               | 158.553857                                              | 1145.570132                                      | 0.900099995                                |
| 1.357070606                               | 520.9742489                                             | 1777.488448                                      | 0.931340752                                |
| 1.345436198                               | 512.5897601                                             | 1527.692545                                      | 0.934250367                                |
| 1.645399396                               | 272.9702153                                             | 1145.93586                                       | 0.887482063                                |
| 1.550021112                               | 343.0369211                                             | 2306.419828                                      | 0.912816982                                |
| 1.521994888                               | 263.4108384                                             | 2067.936521                                      | 0.899819569                                |
| 1.435429462                               | 335.4564699                                             | 1783.531782                                      | 0.921101762                                |
| 1.778739017                               | 131.2066996                                             | 909.4808836                                      | 0.87029864                                 |
| 1.447041912                               | 313.8642985                                             | 1714.224564                                      | 0.917104435                                |
| 1.502934879                               | 345.3977895                                             | 1922.443802                                      | 0.912693173                                |
| 1.537402644                               | 139.1247663                                             | 1008.398738                                      | 0.906552691                                |
| 1.565946715                               | 230.7940797                                             | 1349.43284                                       | 0.897922539                                |
| 1.90394825                                | 103.494442                                              | 740.0456956                                      | 0.858086643                                |
| 1.375139881                               | 212.7487054                                             | 1780.647706                                      | 0.927099025                                |
| 1.488951189                               | 457.0354599                                             | 3595.104519                                      | 0.908365937                                |
| 1.473992337                               | 250.1870349                                             | 2343.752222                                      | 0.915047781                                |
| 1.467768902                               | 211.2811683                                             | 3040.904476                                      | 0.909772877                                |
| 1.587714671                               | 615.3011166                                             | 2326.802474                                      | 0.905564051                                |
| 1.476092603                               | 220.7549884                                             | 1980.90958                                       | 0.91168194                                 |
| 1.771221457                               | 360.5008375                                             | 622.201691                                       | 0.868861605                                |
| 1.71727484                                | 97.32225848                                             | 504.9936492                                      | 0.872027851                                |
| 1.513962889                               | 206.0997225                                             | 4042.414094                                      | 0.911712614                                |

| log.sigma.4.5.mm.3D_glrIm_LongRunHighGrayLevelEmphasis | log.sigma.4.5.mm.3D_glrIm_RunPercentage | log.sigma.4.5.mm.3D_glrIm_LongRunLowGrayLevelEmphasis | log.sigma.4.5.mm.3D_glrIm_RunEntropy |
|--------------------------------------------------------|-----------------------------------------|-------------------------------------------------------|--------------------------------------|
| 696.85445                                              | 0.908576814                             | 0.005268484                                           | 4.935516922                          |
| 102.5503955                                            | 0.859646236                             | 0.058331881                                           | 4.246750581                          |
| 288.961698                                             | 0.878848661                             | 0.015503247                                           | 4.712642034                          |
| 392.641188                                             | 0.892685615                             | 0.014315663                                           | 4.827510791                          |
| 301.543615                                             | 0.87227131                              | 0.01116736                                            | 4.547489687                          |
| 160.0770918                                            | 0.866899767                             | 0.036793158                                           | 4.530776563                          |
| 360.4921914                                            | 0.886092319                             | 0.00922056                                            | 4.729450408                          |
| 780.1410708                                            | 0.869556051                             | 0.004272862                                           | 4.785321362                          |
| 526.6015024                                            | 0.879826728                             | 0.006064803                                           | 4.803471659                          |
| 771.7673879                                            | 0.891862801                             | 0.004327545                                           | 4.593598339                          |
| 202.4645503                                            | 0.872475005                             | 0.023897207                                           | 4.47471263                           |
| 382.1822493                                            | 0.884164859                             | 0.009385659                                           | 4.688575116                          |
| 396.5986017                                            | 0.826212352                             | 0.017516283                                           | 4.695248683                          |
| 528.6446973                                            | 0.868778281                             | 0.007455286                                           | 4.791708365                          |
| 355.9676482                                            | 0.88926799                              | 0.012165669                                           | 4.681930676                          |
| 404.0737283                                            | 0.896937843                             | 0.009506087                                           | 4.780485139                          |
| 417.979639                                             | 0.887643345                             | 0.008521865                                           | 4.410910455                          |
| 179.2609284                                            | 0.839852767                             | 0.026688566                                           | 4.45256744                           |
| 113.8096601                                            | 0.8443167                               | 0.052647232                                           | 4.2960136                            |
| 383.2830546                                            | 0.890999748                             | 0.008932932                                           | 4.846473948                          |
| 286.1051808                                            | 0.836233211                             | 0.016784427                                           | 4.517031893                          |
| 175.4851548                                            | 0.879446781                             | 0.0253462                                             | 4.389145806                          |
| 198.7638988                                            | 0.86733774                              | 0.025306254                                           | 4.565723326                          |
| 295.781018                                             | 0.866670541                             | 0.012466216                                           | 4.545645952                          |
| 498.5563853                                            | 0.897335186                             | 0.006170092                                           | 4.531812464                          |
| 646.7497069                                            | 0.898821314                             | 0.005245465                                           | 4.758681301                          |
| 846.3149304                                            | 0.889623831                             | 0.004404552                                           | 4.847846666                          |
| 361.4700788                                            | 0.866011252                             | 0.010193162                                           | 4.571786256                          |
| 122.5227445                                            | 0.85992084                              | 0.04055373                                            | 4.220047095                          |
| 328.5368256                                            | 0.847876564                             | 0.011273496                                           | 4.450708904                          |
| 600.9302819                                            | 0.86767226                              | 0.00543029                                            | 4.743221714                          |
| 607.3621574                                            | 0.827601591                             | 0.007488612                                           | 4.297873436                          |
| 465.2881726                                            | 0.8970865                               | 0.010207184                                           | 4.921121295                          |
| 520.9390445                                            | 0.894468085                             | 0.008493766                                           | 4.796557056                          |
| 534.5053576                                            | 0.887462447                             | 0.005569495                                           | 4.62619103                           |
| 545.4786554                                            | 0.865083233                             | 0.006435046                                           | 4.565395528                          |
| 996.7332283                                            | 0.839745312                             | 0.004297459                                           | 4.681593016                          |
| 850.4536399                                            | 0.859240159                             | 0.004792637                                           | 5.133768781                          |
| 130.5886433                                            | 0.833208255                             | 0.032724851                                           | 3.924613133                          |
| 369.3230836                                            | 0.901819913                             | 0.012663005                                           | 4.9705399                            |
| 718.0677848                                            | 0.854694265                             | 0.00573142                                            | 4.639808861                          |
| 428.0924542                                            | 0.909669591                             | 0.007224565                                           | 4.859965641                          |
| 463.7706682                                            | 0.898186949                             | 0.007026568                                           | 4.738821914                          |
| 338.0614968                                            | 0.88192555                              | 0.010707122                                           | 4.589179237                          |
| 171.6331391                                            | 0.873239437                             | 0.025716078                                           | 4.508356584                          |
| 547.1290411                                            | 0.890009808                             | 0.006425438                                           | 4.768493916                          |
| 411.9562658                                            | 0.872306343                             | 0.007977188                                           | 4.62517289                           |
| 99.3784317                                             | 0.840325002                             | 0.066639073                                           | 4.237274105                          |
| 244.4221119                                            | 0.873180873                             | 0.022134094                                           | 4.630339153                          |
| 147.3954294                                            | 0.852355485                             | 0.037579676                                           | 4.431083892                          |
| 393.9611162                                            | 0.895828967                             | 0.01193626                                            | 4.750789348                          |
| 352.4250185                                            | 0.909066016                             | 0.008434292                                           | 4.745011786                          |
| 321.4043984                                            | 0.871061784                             | 0.011047515                                           | 4.641445357                          |
| 282.0049281                                            | 0.894997213                             | 0.011492298                                           | 4.480363551                          |
| 201.8825197                                            | 0.885887796                             | 0.023158355                                           | 4.640610468                          |
| 575.7317232                                            | 0.871163708                             | 0.005482397                                           | 4.500621048                          |
| 432.7133159                                            | 0.901568888                             | 0.007371749                                           | 4.77860565                           |
| 721.6762893                                            | 0.867442274                             | 0.005807826                                           | 4.730755138                          |
| 400.2924309                                            | 0.862350635                             | 0.008508687                                           | 4.360311411                          |
| 575.167327                                             | 0.85746185                              | 0.0063315                                             | 4.823798956                          |
| 293.7806504                                            | 0.856520603                             | 0.012849643                                           | 4.598971986                          |
| 371.7671599                                            | 0.881215788                             | 0.010186573                                           | 4.713405664                          |
| 892.4973726                                            | 0.893498279                             | 0.003095194                                           | 4.755577458                          |
| 528.0170394                                            | 0.867617231                             | 0.006575314                                           | 4.81201533                           |
| 256.2212736                                            | 0.875851996                             | 0.014322897                                           | 4.347810563                          |
| 748.4961894                                            | 0.849161455                             | 0.004866023                                           | 4.794366234                          |
| 320.9782603                                            | 0.784568193                             | 0.017822802                                           | 4.312896263                          |
| 634.58855                                              | 0.87984                                 | 0.005248937                                           | 4.858117272                          |
| 593.6082348                                            | 0.884149144                             | 0.005112495                                           | 4.734423829                          |
| 318.756686                                             | 0.844109996                             | 0.012908588                                           | 4.470607709                          |
| 519.7897706                                            | 0.870432877                             | 0.009404291                                           | 4.607748981                          |
| 691.39456                                              | 0.873910705                             | 0.004668824                                           | 4.849414859                          |
| 685.7055685                                            | 0.875856482                             | 0.005600719                                           | 4.64337596                           |
| 397.068843                                             | 0.896244083                             | 0.010110062                                           | 4.69722043                           |
| 371.6616216                                            | 0.888558583                             | 0.010372807                                           | 4.905025575                          |
| 445.504082                                             | 0.869769575                             | 0.008164299                                           | 4.447376956                          |
| 327.6600789                                            | 0.849268011                             | 0.012083748                                           | 4.445124693                          |
| 199.6263306                                            | 0.837883411                             | 0.030392252                                           | 4.606761891                          |
| 263.5807579                                            | 0.866612591                             | 0.013755633                                           | 4.473748012                          |
| 786.2284622                                            | 0.906271582                             | 0.005331511                                           | 4.90309684                           |
| 754.9437608                                            | 0.909656959                             | 0.005271869                                           | 4.954987445                          |
| 508.8248776                                            | 0.848676615                             | 0.010159675                                           | 4.552287207                          |
| 579.7819048                                            | 0.876861896                             | 0.005865135                                           | 4.760510063                          |
| 452.2629891                                            | 0.868832762                             | 0.009035013                                           | 4.573255215                          |
| 527.0067836                                            | 0.892295077                             | 0.008415377                                           | 4.922681324                          |
| 246.8134135                                            | 0.825818437                             | 0.019438594                                           | 4.514293715                          |
| 506.2198832                                            | 0.88743751                              | 0.009091476                                           | 4.802522412                          |
| 554.2790809                                            | 0.8774056                               | 0.005600398                                           | 4.687524751                          |
| 230.1021288                                            | 0.872688104                             | 0.020690363                                           | 4.500892171                          |
| 395.7081069                                            | 0.86351377                              | 0.010594148                                           | 4.688634691                          |
| 186.1418763                                            | 0.809579991                             | 0.035070111                                           | 4.436921417                          |
| 313.9987211                                            | 0.901407996                             | 0.013973663                                           | 4.795032795                          |
| 756.6400902                                            | 0.877098206                             | 0.004158997                                           | 4.66575068                           |
| 399.1275545                                            | 0.882517483                             | 0.00811738                                            | 4.578796934                          |
| 344.0639118                                            | 0.880320277                             | 0.010166167                                           | 4.565445168                          |
| 1051.998231                                            | 0.865553208                             | 0.003522598                                           | 4.919463166                          |
| 351.1556974                                            | 0.881024549                             | 0.012492441                                           | 4.869838362                          |
| 757.1327925                                            | 0.827198589                             | 0.012637931                                           | 4.621203407                          |
| 196.875572                                             | 0.835085778                             | 0.024753158                                           | 4.239294877                          |
| 328.3039508                                            | 0.876875117                             | 0.01070196                                            | 4.624710575                          |

| log.sigma.4.5.mm.3D_glrIm_HighGrayLevelRunEmphasis | log.sigma.4.5.mm.3D_glrIm_RunLengthNonUniformityNormalized | log.sigma.4.5.mm.3D_glszm_GrayLevelVariance |
|----------------------------------------------------|------------------------------------------------------------|---------------------------------------------|
| 508.2182813                                        | 0.839817744                                                | 41.54508367                                 |
| 69.1195784                                         | 0.763162501                                                | 13.51222222                                 |
| 189.7000166                                        | 0.796976235                                                | 22.81882259                                 |
| 277.9929949                                        | 0.810691798                                                | 33.12144245                                 |
| 202.8598455                                        | 0.780718635                                                | 19.26044077                                 |
| 114.8437499                                        | 0.779222081                                                | 18.00322118                                 |
| 253.2653906                                        | 0.809068674                                                | 25.09096709                                 |
| 517.3384825                                        | 0.784082132                                                | 35.53370029                                 |
| 358.2484856                                        | 0.794410146                                                | 26.83818827                                 |
| 542.2213414                                        | 0.814071958                                                | 26.76461186                                 |
| 134.5059148                                        | 0.780177159                                                | 15.39239334                                 |
| 266.0819524                                        | 0.79951865                                                 | 23.84563866                                 |
| 228.0777222                                        | 0.726297453                                                | 33.45017948                                 |
| 353.0741162                                        | 0.7781613                                                  | 37.36090913                                 |
| 244.0755779                                        | 0.809145084                                                | 28.48977943                                 |
| 284.3484292                                        | 0.830245012                                                | 26.75888476                                 |
| 286.3583732                                        | 0.800071799                                                | 23.35066287                                 |
| 116.2540158                                        | 0.734068412                                                | 18.23795773                                 |
| 72.49906198                                        | 0.737365002                                                | 10.29147878                                 |
| 275.4194815                                        | 0.813903048                                                | 30.43208722                                 |
| 171.5660401                                        | 0.736709574                                                | 16.86773646                                 |
| 121.5063394                                        | 0.791105875                                                | 14.44880999                                 |
| 133.1355309                                        | 0.780505983                                                | 18.364375                                   |
| 194.1771356                                        | 0.777965859                                                | 21.03699448                                 |
| 347.5914191                                        | 0.832326175                                                | 25.69253111                                 |
| 462.2596943                                        | 0.826001053                                                | 36.70843963                                 |
| 584.3621001                                        | 0.813740902                                                | 44.00595009                                 |
| 239.3713532                                        | 0.771654838                                                | 21.59505342                                 |
| 86.88147213                                        | 0.763905377                                                | 11.84415225                                 |
| 203.1451466                                        | 0.743899208                                                | 19.60621521                                 |
| 390.5205851                                        | 0.783255089                                                | 27.34083908                                 |
| 330.8015532                                        | 0.717864241                                                | 25.60774335                                 |
| 324.7077993                                        | 0.822820358                                                | 36.18269216                                 |
| 361.6429136                                        | 0.824682505                                                | 33.36282229                                 |
| 371.2834997                                        | 0.808530149                                                | 20.95849116                                 |
| 350.4723696                                        | 0.781447106                                                | 22.43977138                                 |
| 586.1764403                                        | 0.739575127                                                | 44.26110668                                 |
| 540.098902                                         | 0.782647897                                                | 42.23275765                                 |
| 73.76289768                                        | 0.718085625                                                | 9.774522978                                 |
| 271.9703081                                        | 0.826652966                                                | 34.16423039                                 |
| 430.6669786                                        | 0.758585041                                                | 30.2135105                                  |
| 324.7731559                                        | 0.837874593                                                | 34.87444387                                 |
| 329.3528851                                        | 0.825764209                                                | 27.34910538                                 |
| 228.1965262                                        | 0.796118604                                                | 24.09753043                                 |
| 121.5555381                                        | 0.781484798                                                | 18.95083393                                 |
| 380.9976976                                        | 0.812634226                                                | 29.20065323                                 |
| 274.6015561                                        | 0.786173697                                                | 23.69826128                                 |
| 62.67524309                                        | 0.735493476                                                | 10.37709201                                 |
| 167.8386568                                        | 0.783113529                                                | 23.22731569                                 |
| 96.44377807                                        | 0.760968575                                                | 14.26665717                                 |
| 280.2095436                                        | 0.819482034                                                | 26.8448044                                  |
| 265.0056832                                        | 0.838628207                                                | 26.98199507                                 |
| 213.4955443                                        | 0.780497858                                                | 23.46710258                                 |
| 202.514888                                         | 0.81831773                                                 | 20.35649334                                 |
| 143.6292335                                        | 0.804519737                                                | 20.0565661                                  |
| 379.5752616                                        | 0.779067365                                                | 23.34520106                                 |
| 313.2599577                                        | 0.829536061                                                | 28.80571384                                 |
| 456.8927044                                        | 0.777043597                                                | 36.33722781                                 |
| 254.9259088                                        | 0.764108724                                                | 19.30619786                                 |
| 360.5456363                                        | 0.772381349                                                | 26.92777774                                 |
| 194.1480132                                        | 0.761359235                                                | 26.01463614                                 |
| 256.8759652                                        | 0.796049379                                                | 23.75508204                                 |
| 636.1402292                                        | 0.817256322                                                | 29.95769827                                 |
| 356.2495117                                        | 0.77836492                                                 | 29.84144042                                 |
| 164.9774607                                        | 0.792312523                                                | 19.19836565                                 |
| 468.6295232                                        | 0.754492055                                                | 36.85485579                                 |
| 159.5863093                                        | 0.652213703                                                | 16.91094513                                 |
| 431.9439524                                        | 0.795181744                                                | 36.65948367                                 |
| 399.1282655                                        | 0.804259319                                                | 29.88585473                                 |
| 197.2010961                                        | 0.74206533                                                 | 16.8460203                                  |
| 338.949156                                         | 0.784358696                                                | 26.34155702                                 |
| 466.3867221                                        | 0.789204512                                                | 34.19730984                                 |
| 449.8129097                                        | 0.792254195                                                | 31.98492859                                 |
| 279.843623                                         | 0.817677024                                                | 28.6117195                                  |
| 264.7607087                                        | 0.80872276                                                 | 31.01916006                                 |
| 283.7916372                                        | 0.775825074                                                | 21.8504582                                  |
| 198.7676791                                        | 0.754975759                                                | 18.12457112                                 |
| 129.1295297                                        | 0.736617413                                                | 24.10899696                                 |
| 175.1996334                                        | 0.772150852                                                | 17.06332222                                 |
| 563.4357021                                        | 0.836863667                                                | 46.0310628                                  |
| 551.3851036                                        | 0.84295734                                                 | 43.21489232                                 |
| 307.9099973                                        | 0.747907762                                                | 32.58417609                                 |
| 375.6844222                                        | 0.800188561                                                | 30.25861907                                 |
| 293.6837515                                        | 0.771872236                                                | 21.68308836                                 |
| 364.4792852                                        | 0.8162194                                                  | 35.11309834                                 |
| 148.2213297                                        | 0.715914392                                                | 17.87851211                                 |
| 343.9580969                                        | 0.807313235                                                | 32.16048374                                 |
| 376.9351281                                        | 0.797772736                                                | 25.46334181                                 |
| 152.9762259                                        | 0.786105979                                                | 16.61337867                                 |
| 256.5116728                                        | 0.768619195                                                | 29.17099183                                 |
| 115.5250463                                        | 0.69579495                                                 | 12.18205973                                 |
| 229.4570514                                        | 0.827632405                                                | 26.55357177                                 |
| 504.2846045                                        | 0.788749197                                                | 29.50577024                                 |
| 273.0865059                                        | 0.802884566                                                | 23.18921655                                 |
| 232.7651462                                        | 0.791545023                                                | 21.44681607                                 |
| 676.7571437                                        | 0.78365106                                                 | 40.68004261                                 |
| 241.2801095                                        | 0.795780103                                                | 28.83210312                                 |
| 418.204794                                         | 0.714086748                                                | 31.98648163                                 |
| 112.3924243                                        | 0.720227189                                                | 12.76949897                                 |
| 224.5030083                                        | 0.79618538                                                 | 21.97655844                                 |



| log.sigma.4.5.mm.3D_glszm_SmallAreaHighGrayLevelEmphasis | log.sigma.4.5.mm.3D_glszm_GrayLevelNonUniformityNormalized | log.sigma.4.5.mm.3D_glszm_SizeZoneNonUniformityNormalized |
|----------------------------------------------------------|------------------------------------------------------------|-----------------------------------------------------------|
| 255.6553401                                              | 0.045076901                                                | 0.329543234                                               |
| 36.00121476                                              | 0.077511111                                                | 0.223733333                                               |
| 95.20224452                                              | 0.059289283                                                | 0.297786994                                               |
| 139.4575507                                              | 0.049884478                                                | 0.300514598                                               |
| 98.56141395                                              | 0.064156294                                                | 0.252548946                                               |
| 82.17940554                                              | 0.068309933                                                | 0.289240573                                               |
| 139.0745883                                              | 0.057420656                                                | 0.274704735                                               |
| 283.5850035                                              | 0.047863581                                                | 0.288004861                                               |
| 168.3793349                                              | 0.055295005                                                | 0.267170332                                               |
| 261.8655841                                              | 0.060738452                                                | 0.268954126                                               |
| 58.4654586                                               | 0.071425598                                                | 0.241165453                                               |
| 129.8048888                                              | 0.058037447                                                | 0.265201451                                               |
| 105.0152282                                              | 0.049648413                                                | 0.220803488                                               |
| 178.5733193                                              | 0.046478243                                                | 0.30228552                                                |
| 118.2389318                                              | 0.053755514                                                | 0.294986766                                               |
| 149.9852759                                              | 0.054502328                                                | 0.282531417                                               |
| 121.8895804                                              | 0.062932817                                                | 0.229047695                                               |
| 67.88160177                                              | 0.066466063                                                | 0.273750888                                               |
| 23.66896444                                              | 0.087170502                                                | 0.170913963                                               |
| 157.8137836                                              | 0.050492734                                                | 0.284398639                                               |
| 98.59682203                                              | 0.070127589                                                | 0.270663831                                               |
| 55.27261303                                              | 0.074135437                                                | 0.239289941                                               |
| 63.0778832                                               | 0.06445                                                    | 0.2358                                                    |
| 88.73557718                                              | 0.062785279                                                | 0.258223655                                               |
| 166.0384112                                              | 0.055882247                                                | 0.327315429                                               |
| 258.8188665                                              | 0.048327664                                                | 0.311020762                                               |
| 320.3130803                                              | 0.045292406                                                | 0.310726432                                               |
| 121.5264332                                              | 0.062224407                                                | 0.260376758                                               |
| 38.37740579                                              | 0.083460208                                                | 0.20083045                                                |
| 96.30824362                                              | 0.065398887                                                | 0.212641255                                               |
| 202.6306021                                              | 0.054340231                                                | 0.295474932                                               |
| 131.6993038                                              | 0.064118319                                                | 0.263080282                                               |
| 153.3427492                                              | 0.046029796                                                | 0.285166095                                               |
| 172.1639598                                              | 0.04947868                                                 | 0.294288477                                               |
| 193.7048136                                              | 0.063143868                                                | 0.292156293                                               |
| 175.3212687                                              | 0.060797102                                                | 0.294930625                                               |
| 308.7425287                                              | 0.046397073                                                | 0.313186104                                               |
| 287.6860193                                              | 0.043598776                                                | 0.285956315                                               |
| 26.12607471                                              | 0.092985757                                                | 0.160171997                                               |
| 146.8558724                                              | 0.047222001                                                | 0.273309808                                               |
| 196.4429872                                              | 0.055207791                                                | 0.279168835                                               |
| 200.9585409                                              | 0.049383861                                                | 0.295508595                                               |
| 159.463134                                               | 0.053388252                                                | 0.284463846                                               |
| 116.1968966                                              | 0.059133459                                                | 0.27424121                                                |
| 71.38160945                                              | 0.066503949                                                | 0.267292289                                               |
| 197.0679985                                              | 0.052926126                                                | 0.323421084                                               |
| 145.9222741                                              | 0.057519288                                                | 0.268886303                                               |
| 31.19232437                                              | 0.089188617                                                | 0.215450886                                               |
| 98.64655637                                              | 0.060077977                                                | 0.272566163                                               |
| 49.93667937                                              | 0.081238875                                                | 0.271057316                                               |
| 137.9957534                                              | 0.054551837                                                | 0.279968158                                               |
| 139.0476313                                              | 0.053524053                                                | 0.276275635                                               |
| 116.9781176                                              | 0.0569645                                                  | 0.292425053                                               |
| 110.2643111                                              | 0.062098605                                                | 0.336765045                                               |
| 71.05647453                                              | 0.062574746                                                | 0.263184291                                               |
| 181.306094                                               | 0.060952845                                                | 0.234044856                                               |
| 160.9444473                                              | 0.051925758                                                | 0.295686428                                               |
| 193.2273435                                              | 0.047296754                                                | 0.266940534                                               |
| 112.3138221                                              | 0.066125529                                                | 0.278780672                                               |
| 187.7175103                                              | 0.055017963                                                | 0.280369313                                               |
| 120.6830763                                              | 0.055298857                                                | 0.292522689                                               |
| 132.9236088                                              | 0.060464272                                                | 0.266758412                                               |
| 358.9907981                                              | 0.053390226                                                | 0.328239949                                               |
| 225.8062711                                              | 0.052010191                                                | 0.271106991                                               |
| 95.39685252                                              | 0.066095177                                                | 0.315975004                                               |
| 224.3232901                                              | 0.047919705                                                | 0.230185951                                               |
| 59.08441034                                              | 0.08302212                                                 | 0.204682562                                               |
| 238.9784103                                              | 0.0465459                                                  | 0.278965122                                               |
| 199.1883862                                              | 0.050922241                                                | 0.351058509                                               |
| 91.46553818                                              | 0.06944297                                                 | 0.239429591                                               |
| 189.1158712                                              | 0.06102844                                                 | 0.335041655                                               |
| 259.5643748                                              | 0.049323327                                                | 0.294972889                                               |
| 194.9491864                                              | 0.05249653                                                 | 0.256446782                                               |
| 131.8360758                                              | 0.052688237                                                | 0.273559111                                               |
| 157.7538997                                              | 0.051303761                                                | 0.260532974                                               |
| 119.5719358                                              | 0.063588897                                                | 0.252357611                                               |
| 91.13551207                                              | 0.06615773                                                 | 0.274764729                                               |
| 87.48233727                                              | 0.058564333                                                | 0.234257331                                               |
| 85.13105239                                              | 0.068888889                                                | 0.210888889                                               |
| 279.0366953                                              | 0.044780508                                                | 0.312127704                                               |
| 284.5450353                                              | 0.044812254                                                | 0.33367401                                                |
| 157.5649092                                              | 0.052907496                                                | 0.265894557                                               |
| 182.5859469                                              | 0.051766156                                                | 0.295969927                                               |
| 117.4338396                                              | 0.061768861                                                | 0.227805908                                               |
| 193.4777777                                              | 0.047455775                                                | 0.278782518                                               |
| 86.51917805                                              | 0.071487889                                                | 0.264290657                                               |
| 161.0913968                                              | 0.050432679                                                | 0.288153722                                               |
| 214.3725808                                              | 0.057389795                                                | 0.323206646                                               |
| 82.41554562                                              | 0.073670095                                                | 0.264328732                                               |
| 139.4949078                                              | 0.052318539                                                | 0.282961064                                               |
| 67.81756402                                              | 0.083005633                                                | 0.245190775                                               |
| 118.0313424                                              | 0.055736249                                                | 0.282982988                                               |
| 239.4295699                                              | 0.053214835                                                | 0.263702678                                               |
| 143.248572                                               | 0.057765831                                                | 0.30794919                                                |
| 111.5662524                                              | 0.06076087                                                 | 0.234747875                                               |
| 375.2289652                                              | 0.04747948                                                 | 0.322731671                                               |
| 107.8325489                                              | 0.052819848                                                | 0.211817512                                               |
| 200.9017888                                              | 0.05835102                                                 | 0.273795918                                               |
| 30.70293678                                              | 0.080836777                                                | 0.139204545                                               |
| 121.9334241                                              | 0.059463649                                                | 0.29947234                                                |

| log.sigma.4.5.mm.3D_glszm_SizeZoneNonUniformity | log.sigma.4.5.mm.3D_glszm_GrayLevelNonUniformity | log.sigma.4.5.mm.3D_glszm_LargeAreaEmphasis | log.sigma.4.5.mm.3D_glszm_ZoneVariance |
|-------------------------------------------------|--------------------------------------------------|---------------------------------------------|----------------------------------------|
| 236.9415855                                     | 32.41029207                                      | 46.20305981                                 | 37.49276251                            |
| 33.56                                           | 11.62666667                                      | 296.5933333                                 | 257.7388889                            |
| 92.01618123                                     | 18.32038835                                      | 123.0614887                                 | 98.41620846                            |
| 82.94202899                                     | 13.76811594                                      | 64.45289855                                 | 51.92232462                            |
| 110.6164384                                     | 28.10045662                                      | 231.1872146                                 | 201.9581326                            |
| 48.8816568                                      | 11.5443787                                       | 101.5739645                                 | 86.32239768                            |
| 340.633871                                      | 71.2016129                                       | 166.6798387                                 | 145.9112376                            |
| 282.8207739                                     | 47.00203666                                      | 516.6659878                                 | 489.6090401                            |
| 261.5597549                                     | 54.13381001                                      | 124.7354443                                 | 103.173224                             |
| 73.69343066                                     | 16.64233577                                      | 78.61313869                                 | 63.30619639                            |
| 74.76129032                                     | 22.14193548                                      | 109.5354839                                 | 85.8719667                             |
| 133.9267327                                     | 29.30891089                                      | 114.1564356                                 | 93.32308597                            |
| 54.53846154                                     | 12.26315789                                      | 583.2672065                                 | 526.1331935                            |
| 116.9844961                                     | 17.9870801                                       | 222.5917313                                 | 202.9074909                            |
| 148.9683168                                     | 27.14653465                                      | 97.04950495                                 | 81.61472013                            |
| 277.7283825                                     | 53.5757884                                       | 143.0824008                                 | 123.264959                             |
| 60.23954373                                     | 16.5513308                                       | 74.01520913                                 | 53.40429961                            |
| 55.57142857                                     | 13.49261084                                      | 350.1330049                                 | 313.2408454                            |
| 33.67005076                                     | 17.17258883                                      | 318.9746193                                 | 275.5619057                            |
| 354.0763052                                     | 62.86345382                                      | 102.7927711                                 | 85.35460009                            |
| 112.5961538                                     | 29.17307692                                      | 924.3076923                                 | 871.4659763                            |
| 46.66153846                                     | 14.45641026                                      | 146.0358974                                 | 115.4181197                            |
| 47.16                                           | 12.89                                            | 179.49                                      | 153.2756                               |
| 137.1167608                                     | 33.33898305                                      | 181.5536723                                 | 156.7041045                            |
| 109.3233533                                     | 18.66467066                                      | 80.71556886                                 | 66.18897235                            |
| 209.0059524                                     | 32.47619048                                      | 124.6532738                                 | 112.2255505                            |
| 241.1237113                                     | 35.14690722                                      | 169.6920103                                 | 152.3344786                            |
| 136.9581749                                     | 32.73003802                                      | 459.3536122                                 | 431.7811303                            |
| 17.07058824                                     | 7.094117647                                      | 137.9411765                                 | 110.2859516                            |
| 65.49350649                                     | 20.14285714                                      | 333.7467532                                 | 289.2734441                            |
| 270.3595628                                     | 49.72131148                                      | 329.8819672                                 | 302.8419672                            |
| 69.19011407                                     | 16.86311787                                      | 1150.840304                                 | 1088.951872                            |
| 240.3950178                                     | 38.80308422                                      | 111.9655991                                 | 97.29388207                            |
| 176.278798                                      | 29.63772955                                      | 113.933222                                  | 98.54168188                            |
| 308.5170455                                     | 66.67992424                                      | 103.9640152                                 | 86.57132404                            |
| 159.8523985                                     | 32.95202952                                      | 305.6586716                                 | 275.042255                             |
| 182.9006849                                     | 27.09589041                                      | 1156.741438                                 | 1116.144466                            |
| 304.2575188                                     | 46.38909774                                      | 300.487782                                  | 276.9598117                            |
| 19.54098361                                     | 11.3442623                                       | 644.5737705                                 | 542.9277076                            |
| 527.214619                                      | 91.09123898                                      | 61.1881804                                  | 46.98438636                            |
| 138.4677419                                     | 27.38306452                                      | 341.608871                                  | 314.257658                             |
| 355.2013311                                     | 59.359401                                        | 33.40682196                                 | 23.05684439                            |
| 262.56013                                       | 49.27735645                                      | 88.77681473                                 | 73.11305754                            |
| 157.6886957                                     | 34.00173913                                      | 162.8591304                                 | 144.1365777                            |
| 71.3670412                                      | 17.75655431                                      | 188.2172285                                 | 165.3064849                            |
| 235.4505495                                     | 38.53021978                                      | 109.3997253                                 | 95.18226777                            |
| 252.2153518                                     | 53.95309168                                      | 307.3027719                                 | 283.6487559                            |
| 25.63865546                                     | 10.61344538                                      | 376.2941176                                 | 322.7215592                            |
| 50.15217391                                     | 11.05434783                                      | 122.9076087                                 | 101.5169837                            |
| 71.83018868                                     | 21.52830189                                      | 234.5132075                                 | 208.4839587                            |
| 178.0597484                                     | 34.69496855                                      | 79.07389937                                 | 62.75788883                            |
| 273.2366026                                     | 52.93528817                                      | 41.1718908                                  | 29.55406335                            |
| 243.882494                                      | 47.50839329                                      | 406.4244604                                 | 377.155582                             |
| 96.65156794                                     | 17.82229965                                      | 85.71428571                                 | 70.91726256                            |
| 84.74534161                                     | 20.14906832                                      | 84.35403727                                 | 67.29354577                            |
| 77.93693694                                     | 20.2972973                                       | 315.3693694                                 | 281.0783216                            |
| 334.1256637                                     | 58.67610619                                      | 61.89823009                                 | 49.08436448                            |
| 157.4949153                                     | 27.90508475                                      | 409.1322034                                 | 374.7806837                            |
| 88.93103448                                     | 21.09404389                                      | 251.1912226                                 | 224.5021767                            |
| 499.8984857                                     | 98.09702748                                      | 316.8923163                                 | 290.6776866                            |
| 99.16519174                                     | 18.74631268                                      | 330.0648968                                 | 302.9266366                            |
| 153.386087                                      | 34.76695652                                      | 139.7947826                                 | 118.2328922                            |
| 493.344644                                      | 80.24550898                                      | 143.6001331                                 | 128.7650788                            |
| 396.6295284                                     | 76.09090909                                      | 318.2235133                                 | 291.0739288                            |
| 49.92405063                                     | 10.44303797                                      | 121.9493671                                 | 96.94936709                            |
| 144.7869634                                     | 30.14149444                                      | 608.1176471                                 | 570.4192184                            |
| 24.15254237                                     | 9.796610169                                      | 1355.237288                                 | 1233.116059                            |
| 395.293578                                      | 65.95553987                                      | 206.2879323                                 | 186.8334206                            |
| 521.3218855                                     | 75.61952862                                      | 197.0821549                                 | 181.526169                             |
| 103.9124424                                     | 30.13824885                                      | 450.9953917                                 | 406.4074625                            |
| 98.83728814                                     | 18.00338983                                      | 184.4915254                                 | 165.1016834                            |
| 251.3169014                                     | 42.02347418                                      | 258.7183099                                 | 233.3649573                            |
| 120.017094                                      | 24.56837607                                      | 155.758547                                  | 132.0449768                            |
| 161.6734349                                     | 31.13874788                                      | 78.21150592                                 | 63.60126088                            |
| 200.6103896                                     | 39.5038961                                       | 109.5831169                                 | 93.04885984                            |
| 69.1459854                                      | 17.42335766                                      | 119.3722628                                 | 95.38371783                            |
| 111.0049505                                     | 26.72772277                                      | 397.3069307                                 | 362.1338104                            |
| 37.01265823                                     | 9.253164557                                      | 335.1392405                                 | 298.3757411                            |
| 63.26666667                                     | 20.66666667                                      | 164.9966667                                 | 132.6205667                            |
| 215.3681159                                     | 30.89855072                                      | 68.96666667                                 | 57.47554925                            |
| 230.568741                                      | 30.96526773                                      | 46.20984081                                 | 37.92444097                            |
| 87.21341463                                     | 17.35365854                                      | 309.527439                                  | 279.4448896                            |
| 192.9723926                                     | 33.75153374                                      | 327.7315951                                 | 302.5933677                            |
| 114.3585657                                     | 31.00796813                                      | 233.252988                                  | 195.7800551                            |
| 172.8451613                                     | 29.42258065                                      | 73.08870968                                 | 57.61336889                            |
| 44.92941176                                     | 12.15294118                                      | 907.3294118                                 | 826.1175087                            |
| 175.7737705                                     | 30.76393443                                      | 140.1754098                                 | 124.8885918                            |
| 205.2362205                                     | 36.44251969                                      | 279.319685                                  | 260.673609                             |
| 76.39100346                                     | 21.29065744                                      | 191.1487889                                 | 165.4870272                            |
| 111.7696203                                     | 20.66582278                                      | 182.4329114                                 | 156.1510655                            |
| 47.56701031                                     | 16.10309278                                      | 607.5360825                                 | 562.3555107                            |
| 195.5412446                                     | 38.51374819                                      | 41.82633864                                 | 29.94330246                            |
| 300.6210526                                     | 60.66491228                                      | 265.304386                                  | 244.6338035                            |
| 220.4916201                                     | 41.3603352                                       | 217.6927374                                 | 196.4504229                            |
| 202.3526682                                     | 52.37587007                                      | 160.8584687                                 | 135.3688557                            |
| 244.6306069                                     | 35.98944591                                      | 368.055409                                  | 347.6745915                            |
| 120.1005291                                     | 29.94885362                                      | 123.9171076                                 | 99.23356009                            |
| 47.91428571                                     | 10.21142857                                      | 345.2171429                                 | 309.4225633                            |
| 12.25                                           | 7.113636364                                      | 408.1136364                                 | 318.294938                             |
| 351.88                                          | 69.86978723                                      | 234.6382979                                 | 210.4904837                            |

| log.sigma.4.5.mm.3D_glszm_ZonePercentage | log.sigma.4.5.mm.3D_glszm_LargeAreaLowGrayLevelEmphasis | log.sigma.4.5.mm.3D_glszm_LargeAreaHighGrayLevelEmphasis | log.sigma.4.5.mm.3D_glszm_HighGrayLevelZoneEmphasis |
|------------------------------------------|---------------------------------------------------------|----------------------------------------------------------|-----------------------------------------------------|
| 0.338831291                              | 0.103628536                                             | 24255.57441                                              | 460.3991655                                         |
| 0.160427807                              | 8.597415853                                             | 13322.25333                                              | 80.2066667                                          |
| 0.201434159                              | 0.980119569                                             | 22812.35275                                              | 178.381877                                          |
| 0.282497441                              | 0.3694461                                               | 16915.46377                                              | 261.5036232                                         |
| 0.184966216                              | 1.444496427                                             | 40840.49315                                              | 199.9726027                                         |
| 0.256060606                              | 2.219992876                                             | 6316.662722                                              | 144.7988166                                         |
| 0.219430189                              | 0.976650141                                             | 33111.18548                                              | 266.9185484                                         |
| 0.192247455                              | 1.225304885                                             | 225162.2434                                              | 536.1629328                                         |
| 0.215354158                              | 0.437032617                                             | 41217.78958                                              | 338.1317671                                         |
| 0.255597015                              | 0.175821342                                             | 39113.58759                                              | 526.9562044                                         |
| 0.205570292                              | 1.194978736                                             | 13939.96774                                              | 127.2741935                                         |
| 0.219088937                              | 0.56645617                                              | 29011.24356                                              | 256.5742574                                         |
| 0.132297804                              | 3.230871379                                             | 114533.2308                                              | 234.1255061                                         |
| 0.225393128                              | 0.795924164                                             | 65900.78036                                              | 344.1085271                                         |
| 0.25453629                               | 0.462044794                                             | 24316.92079                                              | 227.7188119                                         |
| 0.224634369                              | 0.796126295                                             | 33860.31536                                              | 282.889115                                          |
| 0.220268007                              | 0.274588339                                             | 23765.60456                                              | 259.5513308                                         |
| 0.164639092                              | 5.383389294                                             | 26103.31034                                              | 135.5812808                                         |
| 0.151771957                              | 9.481960097                                             | 14281.5736                                               | 71.40101523                                         |
| 0.239469129                              | 0.5526052                                               | 23173.7245                                               | 293.0803213                                         |
| 0.137566138                              | 7.473617495                                             | 123084.0264                                              | 186.0552885                                         |
| 0.180722892                              | 2.315589788                                             | 13612.85128                                              | 123.0358974                                         |
| 0.1953125                                | 2.253341028                                             | 18097.92                                                 | 139.915                                             |
| 0.200604458                              | 1.20247775                                              | 30464.61582                                              | 186.094162                                          |
| 0.262372349                              | 0.265500815                                             | 26724.08383                                              | 317.754491                                          |
| 0.283663993                              | 0.295228139                                             | 56266.98512                                              | 459.1577381                                         |
| 0.240024745                              | 0.327136792                                             | 96057.06186                                              | 575.579897                                          |
| 0.190441709                              | 2.508817193                                             | 88541.4981                                               | 246.5380228                                         |
| 0.1901566                                | 3.994322417                                             | 6427.447059                                              | 107.4235294                                         |
| 0.149951315                              | 1.999716787                                             | 60179.92208                                              | 205.7337662                                         |
| 0.192307692                              | 1.052603989                                             | 110702.2809                                              | 380.3289617                                         |
| 0.127114548                              | 3.353293709                                             | 402777.1141                                              | 267.6882129                                         |
| 0.261071539                              | 0.405808022                                             | 39266.95255                                              | 294.3890866                                         |
| 0.254893617                              | 0.358318419                                             | 42083.27379                                              | 329.4440735                                         |
| 0.239782016                              | 0.342273091                                             | 35614.12405                                              | 364.7518939                                         |
| 0.180726909                              | 1.110283667                                             | 91546.87638                                              | 335.9649446                                         |
| 0.156947057                              | 2.096497252                                             | 648251.5068                                              | 556.8493151                                         |
| 0.206161597                              | 0.756395819                                             | 130310.8712                                              | 536.0413534                                         |
| 0.099186992                              | 10.22478318                                             | 45584.47541                                              | 65.90163934                                         |
| 0.265337001                              | 0.381769753                                             | 15433.17574                                              | 280.5842405                                         |
| 0.191210486                              | 0.759832785                                             | 160161.006                                               | 376.578629                                          |
| 0.310835273                              | 0.14479818                                              | 10280.54908                                              | 344.8336106                                         |
| 0.252669039                              | 0.342269475                                             | 26484.91549                                              | 313.0433369                                         |
| 0.231109325                              | 0.817510073                                             | 36244.55652                                              | 218.9791304                                         |
| 0.208920188                              | 2.999310103                                             | 14158.33708                                              | 143.0187266                                         |
| 0.265209472                              | 0.357369134                                             | 38280.52198                                              | 358.7129121                                         |
| 0.205611574                              | 1.444020567                                             | 69308.0064                                               | 283.0181237                                         |
| 0.136624569                              | 14.81480956                                             | 13626.33613                                              | 70.79831933                                         |
| 0.216216216                              | 1.341669675                                             | 14993.91304                                              | 189.4130435                                         |
| 0.196005917                              | 5.601435674                                             | 12575.36226                                              | 105.9924528                                         |
| 0.247567147                              | 0.412677331                                             | 21341.78145                                              | 263.6949686                                         |
| 0.293384752                              | 0.216109172                                             | 10267.09302                                              | 267.4671385                                         |
| 0.184840426                              | 2.474989371                                             | 72032.34892                                              | 215.3261391                                         |
| 0.259963768                              | 0.621765086                                             | 13968.54704                                              | 198.9094077                                         |
| 0.242105263                              | 1.320485121                                             | 9028.074534                                              | 145.8167702                                         |
| 0.170769231                              | 0.930638826                                             | 110566.9309                                              | 379.6816817                                         |
| 0.279357231                              | 0.246718714                                             | 18722.05575                                              | 301.260177                                          |
| 0.170618855                              | 0.932575431                                             | 190672.1644                                              | 391.5                                               |
| 0.193567961                              | 1.080230229                                             | 61240.0627                                               | 225.2601881                                         |
| 0.195311644                              | 1.133941441                                             | 97936.02636                                              | 353.5984296                                         |
| 0.19195923                               | 2.492833643                                             | 46715.74041                                              | 225.0825959                                         |
| 0.215355805                              | 0.778860273                                             | 30118.61565                                              | 261.933913                                          |
| 0.259630333                              | 0.264811962                                             | 81881.89953                                              | 627.2934132                                         |
| 0.191919192                              | 1.254052334                                             | 85947.85509                                              | 412.5345181                                         |
| 0.2                                      | 0.992540452                                             | 17747.08228                                              | 174.6582278                                         |
| 0.16286898                               | 1.561915936                                             | 243052.283                                               | 480.3958665                                         |
| 0.090490798                              | 9.788972492                                             | 194873.9576                                              | 148.9661017                                         |
| 0.22672                                  | 0.54102276                                              | 83431.28299                                              | 442.3535639                                         |
| 0.253542769                              | 0.534661557                                             | 77033.6862                                               | 348.189899                                          |
| 0.149758454                              | 3.050918905                                             | 73762.85945                                              | 196.7396313                                         |
| 0.227097768                              | 0.652558872                                             | 57695.89492                                              | 324.7525424                                         |
| 0.198601399                              | 0.688465005                                             | 103219.4894                                              | 479.2488263                                         |
| 0.205353225                              | 0.394235143                                             | 66765.61538                                              | 412.6517094                                         |
| 0.261620186                              | 0.308670605                                             | 24495.45516                                              | 259.2301184                                         |
| 0.245927819                              | 0.664061945                                             | 23038.17403                                              | 293.7116883                                         |
| 0.204172876                              | 0.434429561                                             | 35886.32847                                              | 250.4781022                                         |
| 0.168614357                              | 2.419614874                                             | 72011.19059                                              | 185.4554455                                         |
| 0.164926931                              | 4.938761955                                             | 25848.37342                                              | 176.2721519                                         |
| 0.175746924                              | 1.325023529                                             | 24170.08667                                              | 185.9766667                                         |
| 0.294997862                              | 0.129982288                                             | 45729.28261                                              | 505.4188406                                         |
| 0.347410759                              | 0.098824162                                             | 26365.41679                                              | 503.6309696                                         |
| 0.182323513                              | 1.052977276                                             | 97793.5061                                               | 302.0243902                                         |
| 0.199449373                              | 0.985701786                                             | 115482.2117                                              | 352.6042945                                         |
| 0.163358282                              | 0.88561718                                              | 74174.11753                                              | 264.9063745                                         |
| 0.254202542                              | 0.269374154                                             | 26589.9629                                               | 355.9274194                                         |
| 0.110966057                              | 9.28627698                                              | 101008.3529                                              | 166.2882353                                         |
| 0.255765199                              | 0.449180756                                             | 50011.52295                                              | 307.2852459                                         |
| 0.231582786                              | 0.964942865                                             | 84402.24252                                              | 383.9543307                                         |
| 0.197404372                              | 1.761672336                                             | 25219.52595                                              | 155.4290657                                         |
| 0.195061728                              | 0.896176035                                             | 41484.26076                                              | 255.9974684                                         |
| 0.148773006                              | 13.71214855                                             | 32131.57732                                              | 137.2989691                                         |
| 0.290092359                              | 0.308123734                                             | 8915.001447                                              | 223.8523878                                         |
| 0.219949836                              | 0.56750014                                              | 127871.4307                                              | 474.5307018                                         |
| 0.216969697                              | 0.951054643                                             | 53535.53771                                              | 262.0125698                                         |
| 0.198069853                              | 0.732173355                                             | 40514.16821                                              | 225.7842227                                         |
| 0.22150789                               | 0.660961448                                             | 212101.5976                                              | 664.3614776                                         |
| 0.201277955                              | 0.779485714                                             | 27687.22222                                              | 246.8500882                                         |
| 0.167144222                              | 0.949159135                                             | 151241.6057                                              | 373.2857143                                         |
| 0.105515588                              | 4.160791478                                             | 46567.54545                                              | 104.1022727                                         |
| 0.203498441                              | 1.599371609                                             | 39452.30298                                              | 229.6553191                                         |

| log.sigma.4.5.mm.3D_glszm_SmallAreaEmphasis | log.sigma.4.5.mm.3D_glszm_LowGrayLevelZoneEmphasis | log.sigma.4.5.mm.3D_glszm_ZoneEntropy | log.sigma.4.5.mm.3D_glszm_SmallAreaLowGrayLevelEmphasis |
|---------------------------------------------|----------------------------------------------------|---------------------------------------|---------------------------------------------------------|
| 0.593468329                                 | 0.006035212                                        | 6.654337468                           | 0.003562544                                             |
| 0.48128507                                  | 0.052946865                                        | 5.885630087                           | 0.022797346                                             |
| 0.563359259                                 | 0.020201758                                        | 6.251392713                           | 0.015154318                                             |
| 0.56598001                                  | 0.013711326                                        | 6.330731493                           | 0.00696318                                              |
| 0.516312055                                 | 0.011395289                                        | 6.519782933                           | 0.007235557                                             |
| 0.545812384                                 | 0.022094104                                        | 5.714848985                           | 0.00834217                                              |
| 0.540612918                                 | 0.007612889                                        | 6.817339703                           | 0.004024091                                             |
| 0.553081196                                 | 0.004196119                                        | 6.904508989                           | 0.002091085                                             |
| 0.530640155                                 | 0.006273485                                        | 6.846603686                           | 0.00405298                                              |
| 0.524861984                                 | 0.006568033                                        | 6.265870481                           | 0.005415319                                             |
| 0.503251644                                 | 0.021748802                                        | 6.251088241                           | 0.0088344                                               |
| 0.528073658                                 | 0.009342015                                        | 6.578335081                           | 0.004784974                                             |
| 0.47483653                                  | 0.020605522                                        | 6.545522417                           | 0.007624854                                             |
| 0.565726841                                 | 0.009557102                                        | 6.533054956                           | 0.006594024                                             |
| 0.557236141                                 | 0.013547872                                        | 6.483116311                           | 0.007630905                                             |
| 0.549526138                                 | 0.008461628                                        | 6.798341753                           | 0.005139616                                             |
| 0.490117631                                 | 0.012194844                                        | 6.516177749                           | 0.008786544                                             |
| 0.539603777                                 | 0.022814804                                        | 6.013135771                           | 0.016409765                                             |
| 0.394973738                                 | 0.052732599                                        | 6.059976679                           | 0.029246602                                             |
| 0.548588992                                 | 0.007696193                                        | 6.904782639                           | 0.004574265                                             |
| 0.535838331                                 | 0.012629235                                        | 6.302740625                           | 0.005590727                                             |
| 0.503109132                                 | 0.02208722                                         | 6.037022158                           | 0.014007879                                             |
| 0.493342124                                 | 0.021552551                                        | 6.184685122                           | 0.012379875                                             |
| 0.521821503                                 | 0.014329457                                        | 6.563577347                           | 0.010085655                                             |
| 0.592012865                                 | 0.008166828                                        | 6.206981471                           | 0.006649039                                             |
| 0.57475326                                  | 0.006241002                                        | 6.6848811                             | 0.004297015                                             |
| 0.575779594                                 | 0.005131361                                        | 6.841056748                           | 0.00348452                                              |
| 0.517859819                                 | 0.011545035                                        | 6.467339916                           | 0.007810386                                             |
| 0.414963412                                 | 0.030273844                                        | 5.368173366                           | 0.020467235                                             |
| 0.468343712                                 | 0.012169854                                        | 6.553326824                           | 0.00815669                                              |
| 0.560502906                                 | 0.005434507                                        | 6.701957873                           | 0.003829122                                             |
| 0.52493383                                  | 0.012943398                                        | 6.304491862                           | 0.009627483                                             |
| 0.547805393                                 | 0.010862949                                        | 6.808756416                           | 0.006182325                                             |
| 0.556180181                                 | 0.011752246                                        | 6.651074774                           | 0.007686292                                             |
| 0.556911004                                 | 0.005208241                                        | 6.552032025                           | 0.003273011                                             |
| 0.560423326                                 | 0.006898932                                        | 6.430048058                           | 0.004602934                                             |
| 0.579899805                                 | 0.005814199                                        | 6.78057227                            | 0.004023004                                             |
| 0.550143894                                 | 0.00418301                                         | 7.026754159                           | 0.002661883                                             |
| 0.395187585                                 | 0.041989291                                        | 5.963415465                           | 0.022429505                                             |
| 0.53759112                                  | 0.010198361                                        | 7.0951758                             | 0.005287252                                             |
| 0.541426321                                 | 0.007129256                                        | 6.640887095                           | 0.004571951                                             |
| 0.559649571                                 | 0.006915622                                        | 6.886524934                           | 0.004427894                                             |
| 0.550049858                                 | 0.007700956                                        | 6.759053964                           | 0.004615215                                             |
| 0.537979238                                 | 0.012049783                                        | 6.582665155                           | 0.007816803                                             |
| 0.530553461                                 | 0.023385035                                        | 6.168145605                           | 0.015950549                                             |
| 0.585028908                                 | 0.006486902                                        | 6.446923714                           | 0.004186926                                             |
| 0.531399841                                 | 0.007228812                                        | 6.751075187                           | 0.003976677                                             |
| 0.457075314                                 | 0.046536308                                        | 5.729949096                           | 0.01915218                                              |
| 0.536683029                                 | 0.01727012                                         | 6.1187035                             | 0.007571555                                             |
| 0.534986044                                 | 0.031843305                                        | 5.984138347                           | 0.023662842                                             |
| 0.543442485                                 | 0.010718695                                        | 6.635942711                           | 0.004573385                                             |
| 0.539166063                                 | 0.00803266                                         | 6.787015103                           | 0.005189314                                             |
| 0.55946307                                  | 0.01033679                                         | 6.642907951                           | 0.005521486                                             |
| 0.601268788                                 | 0.012480834                                        | 5.969683941                           | 0.009151858                                             |
| 0.523016192                                 | 0.019180283                                        | 6.229984352                           | 0.011490646                                             |
| 0.497538491                                 | 0.007523622                                        | 6.591277256                           | 0.005876285                                             |
| 0.560003055                                 | 0.007846657                                        | 6.770874418                           | 0.005128331                                             |
| 0.532645481                                 | 0.007558911                                        | 6.866086692                           | 0.004545826                                             |
| 0.542323336                                 | 0.012088423                                        | 6.22721782                            | 0.009492883                                             |
| 0.544478361                                 | 0.005291813                                        | 6.902670305                           | 0.00319637                                              |
| 0.555037115                                 | 0.011776055                                        | 6.35450651                            | 0.008461793                                             |
| 0.531633414                                 | 0.009169029                                        | 6.627281788                           | 0.005620571                                             |
| 0.592501213                                 | 0.003033573                                        | 6.694208884                           | 0.002044012                                             |
| 0.535982801                                 | 0.005310431                                        | 7.005148733                           | 0.002375287                                             |
| 0.58029085                                  | 0.017074251                                        | 5.798902193                           | 0.013579988                                             |
| 0.48447481                                  | 0.005570064                                        | 7.052904999                           | 0.003870795                                             |
| 0.452114447                                 | 0.022176807                                        | 5.8486323                             | 0.014504024                                             |
| 0.541453233                                 | 0.005531718                                        | 7.023881143                           | 0.003550315                                             |
| 0.614992529                                 | 0.005748044                                        | 6.605690713                           | 0.004174415                                             |
| 0.500146075                                 | 0.011795597                                        | 6.437684876                           | 0.006154225                                             |
| 0.600013818                                 | 0.009867832                                        | 6.05245266                            | 0.00421217                                              |
| 0.560325128                                 | 0.004940485                                        | 6.801320045                           | 0.003248314                                             |
| 0.516493399                                 | 0.007089422                                        | 6.747292098                           | 0.003808085                                             |
| 0.536598213                                 | 0.011411414                                        | 6.649886742                           | 0.00651567                                              |
| 0.519820078                                 | 0.009149736                                        | 6.867525287                           | 0.005689448                                             |
| 0.512908891                                 | 0.011951538                                        | 6.326960663                           | 0.008858175                                             |
| 0.536143372                                 | 0.013268452                                        | 6.278130868                           | 0.00901509                                              |
| 0.495733198                                 | 0.02034384                                         | 6.161782945                           | 0.007046413                                             |
| 0.464739798                                 | 0.013227719                                        | 6.410997967                           | 0.008138061                                             |
| 0.577057921                                 | 0.006758868                                        | 6.79429537                            | 0.004575578                                             |
| 0.596612715                                 | 0.006038634                                        | 6.642403454                           | 0.004016775                                             |
| 0.528811371                                 | 0.014034512                                        | 6.578964003                           | 0.008310234                                             |
| 0.561307792                                 | 0.006477951                                        | 6.596542869                           | 0.00446911                                              |
| 0.485393958                                 | 0.008740856                                        | 6.712095852                           | 0.00519111                                              |
| 0.541216728                                 | 0.007136016                                        | 6.776112578                           | 0.002740581                                             |
| 0.527685884                                 | 0.019098945                                        | 5.898238361                           | 0.013078846                                             |
| 0.550704418                                 | 0.009203395                                        | 6.661702179                           | 0.00447618                                              |
| 0.589152184                                 | 0.005952056                                        | 6.438477494                           | 0.00462709                                              |
| 0.529389391                                 | 0.016197148                                        | 6.127948951                           | 0.006356556                                             |
| 0.549875622                                 | 0.013007339                                        | 6.580982609                           | 0.008982981                                             |
| 0.505609479                                 | 0.017022369                                        | 5.822799883                           | 0.010794024                                             |
| 0.545559812                                 | 0.011428836                                        | 6.628535266                           | 0.005673801                                             |
| 0.526292179                                 | 0.005178664                                        | 6.909891494                           | 0.003718074                                             |
| 0.573340768                                 | 0.008224075                                        | 6.517216578                           | 0.004650844                                             |
| 0.492018282                                 | 0.010896258                                        | 6.867291324                           | 0.005901895                                             |
| 0.588825794                                 | 0.004085828                                        | 6.727451596                           | 0.003025691                                             |
| 0.463456632                                 | 0.011119155                                        | 6.948385712                           | 0.006005948                                             |
| 0.538343354                                 | 0.012209314                                        | 6.096323554                           | 0.003333279                                             |
| 0.34124941                                  | 0.031145852                                        | 5.74029284                            | 0.010921947                                             |
| 0.56583165                                  | 0.011390812                                        | 6.622819146                           | 0.008426511                                             |

| log.sigma.4.5.mm.3D_ngtdm_Coarseness | log.sigma.4.5.mm.3D_ngtdm_Complexity | log.sigma.4.5.mm.3D_ngtdm_Strength | log.sigma.4.5.mm.3D_ngtdm_Busyness | log.sigma.4.5.mm.3D_ngtdm_Contrast |
|--------------------------------------|--------------------------------------|------------------------------------|------------------------------------|------------------------------------|
| 0.006318896                          | 0.408226423                          | 3.12310526                         | 0.172459944                        | 3.80E-05                           |
| 0.011621172                          | 0.12799503                           | 1.25774141                         | 0.798814545                        | 8.59E-05                           |
| 0.009506814                          | 0.191276666                          | 1.908854073                        | 0.364304959                        | 5.19E-05                           |
| 0.014817241                          | 0.382727695                          | 3.713744774                        | 0.159304335                        | 0.00010672                         |
| 0.00556409                           | 0.12422776                           | 1.213468557                        | 0.487395762                        | 2.27E-05                           |
| 0.017445167                          | 0.414487431                          | 3.640234815                        | 0.284371826                        | 0.000134024                        |
| 0.00231817                           | 0.117265008                          | 1.114470934                        | 0.710921638                        | 8.02E-06                           |
| 0.002734745                          | 0.138465946                          | 1.654654645                        | 0.361706231                        | 7.62E-06                           |
| 0.003038247                          | 0.124338185                          | 1.180226162                        | 0.501721322                        | 1.20E-05                           |
| 0.011779003                          | 0.492144178                          | 4.724961594                        | 0.116602184                        | 5.85E-05                           |
| 0.008781742                          | 0.139255354                          | 1.435077254                        | 0.476893787                        | 4.01E-05                           |
| 0.00568187                           | 0.187186404                          | 1.815869493                        | 0.354439872                        | 2.46E-05                           |
| 0.007810177                          | 0.149702461                          | 2.304286586                        | 0.2791367                          | 2.40E-05                           |
| 0.008400413                          | 0.285181031                          | 3.026348205                        | 0.180506477                        | 3.33E-05                           |
| 0.006169003                          | 0.257176178                          | 2.032392447                        | 0.307947918                        | 3.15E-05                           |
| 0.003010843                          | 0.116803165                          | 0.963622192                        | 0.65019909                         | 1.69E-05                           |
| 0.009766741                          | 0.280430159                          | 2.693863186                        | 0.200129036                        | 5.21E-05                           |
| 0.01003899                           | 0.135416016                          | 1.421524946                        | 0.574811495                        | 6.26E-05                           |
| 0.009491412                          | 0.070431117                          | 0.833251664                        | 1.113460372                        | 5.89E-05                           |
| 0.00275756                           | 0.107754332                          | 1.014346414                        | 0.669763859                        | 1.18E-05                           |
| 0.004665664                          | 0.075396061                          | 0.992738004                        | 0.632542077                        | 1.32E-05                           |
| 0.012364724                          | 0.153324553                          | 1.599845083                        | 0.440675805                        | 6.47E-05                           |
| 0.013526384                          | 0.173036459                          | 2.004592197                        | 0.393119963                        | 7.77E-05                           |
| 0.004714361                          | 0.148224735                          | 1.440831172                        | 0.480844913                        | 1.60E-05                           |
| 0.008287576                          | 0.439068613                          | 2.634083507                        | 0.194226213                        | 5.03E-05                           |
| 0.005143326                          | 0.34384439                           | 2.80824139                         | 0.20292041                         | 2.32E-05                           |
| 0.004024641                          | 0.313651876                          | 3.143306891                        | 0.191601833                        | 1.40E-05                           |
| 0.004733462                          | 0.115733597                          | 1.197027392                        | 0.482724018                        | 1.84E-05                           |
| 0.025949835                          | 0.254745364                          | 2.71508782                         | 0.378783157                        | 0.000190493                        |
| 0.006238741                          | 0.11492026                           | 1.451210699                        | 0.413405796                        | 1.84E-05                           |
| 0.002816229                          | 0.12667236                           | 1.247212563                        | 0.463787771                        | 9.07E-06                           |
| 0.005610714                          | 0.157837301                          | 2.307713671                        | 0.25280446                         | 1.39E-05                           |
| 0.004631849                          | 0.184056778                          | 1.793438939                        | 0.339107876                        | 2.26E-05                           |
| 0.00555086                           | 0.270337395                          | 2.296060253                        | 0.248902262                        | 2.75E-05                           |
| 0.002754972                          | 0.12169216                           | 1.05937549                         | 0.558391566                        | 1.18E-05                           |
| 0.004308079                          | 0.140416502                          | 1.509799978                        | 0.387842971                        | 1.50E-05                           |
| 0.00364009                           | 0.191802383                          | 2.908779247                        | 0.208993177                        | 7.62E-06                           |
| 0.003216935                          | 0.161980335                          | 1.862168002                        | 0.310319311                        | 1.07E-05                           |
| 0.009538009                          | 0.058284656                          | 0.741724881                        | 0.751029239                        | 2.84E-05                           |
| 0.002168684                          | 0.074711327                          | 0.746229108                        | 0.941725525                        | 1.09E-05                           |
| 0.005481307                          | 0.206009915                          | 2.665781491                        | 0.193893991                        | 1.44E-05                           |
| 0.003700912                          | 0.240253287                          | 2.33230868                         | 0.335792496                        | 1.31E-05                           |
| 0.003456056                          | 0.150404214                          | 1.103388673                        | 0.522154217                        | 2.00E-05                           |
| 0.00507459                           | 0.204309051                          | 1.831551141                        | 0.36102251                         | 1.89E-05                           |
| 0.009625472                          | 0.201073693                          | 1.897761713                        | 0.502257235                        | 5.78E-05                           |
| 0.004492578                          | 0.26215282                           | 2.015520272                        | 0.285460535                        | 2.04E-05                           |
| 0.002826223                          | 0.101181533                          | 0.984198446                        | 0.616849222                        | 9.33E-06                           |
| 0.01481494                           | 0.08668703                           | 1.130074219                        | 0.921389207                        | 9.14E-05                           |
| 0.015587091                          | 0.311872332                          | 3.127635658                        | 0.241325255                        | 8.83E-05                           |
| 0.00909464                           | 0.170948868                          | 1.693330108                        | 0.564646457                        | 4.38E-05                           |
| 0.005145634                          | 0.16702195                           | 1.398182304                        | 0.426920031                        | 3.02E-05                           |
| 0.003756522                          | 0.191711194                          | 1.357249896                        | 0.495560898                        | 2.04E-05                           |
| 0.002910436                          | 0.077121944                          | 0.783525279                        | 0.82613212                         | 1.15E-05                           |
| 0.010422525                          | 0.272261952                          | 1.716847702                        | 0.329748421                        | 7.99E-05                           |
| 0.009396104                          | 0.238963296                          | 1.810079833                        | 0.469006448                        | 7.17E-05                           |
| 0.006952012                          | 0.192595737                          | 2.461598512                        | 0.219491511                        | 1.93E-05                           |
| 0.003320021                          | 0.136901127                          | 1.126035014                        | 0.526696893                        | 1.67E-05                           |
| 0.004190029                          | 0.148991312                          | 2.053039056                        | 0.278331947                        | 1.34E-05                           |
| 0.007620091                          | 0.169872477                          | 1.638612095                        | 0.285402962                        | 2.60E-05                           |
| 0.001536846                          | 0.065409895                          | 0.714889351                        | 0.858414317                        | 4.47E-06                           |
| 0.007782122                          | 0.20992745                           | 2.361099445                        | 0.311582319                        | 2.70E-05                           |
| 0.005094401                          | 0.151405675                          | 1.449340246                        | 0.441409422                        | 2.37E-05                           |
| 0.002103347                          | 0.186149317                          | 1.666300121                        | 0.366273593                        | 6.77E-06                           |
| 0.001998781                          | 0.079456746                          | 0.98240625                         | 0.661515959                        | 5.35E-06                           |
| 0.014036544                          | 0.293483663                          | 2.226700144                        | 0.277731133                        | 8.84E-05                           |
| 0.004159474                          | 0.152825604                          | 2.391890649                        | 0.241226994                        | 7.94E-06                           |
| 0.011163003                          | 0.10363838                           | 2.006272757                        | 0.270238666                        | 1.78E-05                           |
| 0.002392741                          | 0.121910635                          | 1.40059283                         | 0.424835011                        | 6.44E-06                           |
| 0.002362592                          | 0.10437789                           | 1.139853709                        | 0.502543513                        | 7.30E-06                           |
| 0.004629834                          | 0.078164984                          | 0.907414537                        | 0.647178103                        | 1.53E-05                           |
| 0.010057199                          | 0.347941503                          | 3.817274559                        | 0.14815702                         | 3.71E-05                           |
| 0.003259132                          | 0.159046453                          | 1.705131594                        | 0.352326379                        | 1.10E-05                           |
| 0.005732369                          | 0.23492666                           | 2.707177705                        | 0.21498283                         | 2.07E-05                           |
| 0.005907077                          | 0.187733559                          | 1.58212127                         | 0.334432878                        | 3.26E-05                           |
| 0.00466228                           | 0.173750364                          | 1.734946185                        | 0.432925858                        | 2.23E-05                           |
| 0.009050229                          | 0.253484515                          | 2.620162743                        | 0.204680352                        | 3.53E-05                           |
| 0.00525367                           | 0.119128302                          | 1.210370891                        | 0.456120539                        | 1.62E-05                           |
| 0.015654586                          | 0.229458025                          | 3.611424983                        | 0.26073969                         | 5.78E-05                           |
| 0.007707033                          | 0.132622372                          | 1.476137205                        | 0.428797714                        | 3.05E-05                           |
| 0.006013218                          | 0.387670951                          | 4.003247926                        | 0.142442972                        | 2.82E-05                           |
| 0.006913216                          | 0.453674536                          | 3.763259042                        | 0.144428851                        | 4.04E-05                           |
| 0.007302922                          | 0.270105065                          | 3.658878599                        | 0.171458861                        | 1.55E-05                           |
| 0.0041303                            | 0.151164966                          | 1.597337959                        | 0.354975028                        | 1.61E-05                           |
| 0.004704305                          | 0.10731149                           | 1.579792082                        | 0.363085083                        | 1.28E-05                           |
| 0.005871437                          | 0.301960468                          | 2.896456401                        | 0.21906209                         | 2.42E-05                           |
| 0.009591876                          | 0.114611583                          | 1.736135556                        | 0.408445428                        | 3.12E-05                           |
| 0.005614152                          | 0.204750794                          | 1.92802941                         | 0.285027518                        | 3.13E-05                           |
| 0.004631731                          | 0.203177762                          | 1.802066661                        | 0.317905984                        | 1.85E-05                           |
| 0.008306361                          | 0.169665449                          | 1.549916608                        | 0.442635751                        | 4.41E-05                           |
| 0.006990397                          | 0.17628538                           | 2.027245009                        | 0.285301444                        | 2.46E-05                           |
| 0.009358994                          | 0.089287325                          | 1.121970303                        | 0.867501901                        | 8.59E-05                           |
| 0.005349323                          | 0.201398285                          | 1.571547993                        | 0.459689331                        | 3.55E-05                           |
| 0.002803851                          | 0.119590931                          | 1.642523279                        | 0.344468852                        | 6.35E-06                           |
| 0.003705959                          | 0.137662218                          | 1.175831825                        | 0.485849789                        | 1.47E-05                           |
| 0.003183552                          | 0.091332629                          | 1.017314749                        | 0.599058136                        | 9.15E-06                           |
| 0.004109951                          | 0.286915585                          | 3.217360743                        | 0.185746783                        | 1.30E-05                           |
| 0.0057186                            | 0.130750963                          | 1.738851799                        | 0.394987448                        | 2.27E-05                           |
| 0.013472359                          | 0.376175911                          | 6.202014094                        | 0.092217541                        | 4.80E-05                           |
| 0.016596094                          | 0.109119478                          | 1.715351108                        | 0.337448219                        | 5.41E-05                           |
| 0.002152366                          | 0.069945345                          | 0.535258839                        | 1.174893233                        | 1.08E-05                           |

| log.sigma.4.0.mm.3D_gldm_GrayLevelVariance | log.sigma.4.0.mm.3D_gldm_HighGrayLevelEmphasis | log.sigma.4.0.mm.3D_gldm_GrayLevelNonUniformityNormalized | log.sigma.4.0.mm.3D_gldm_DependenceEntropy |
|--------------------------------------------|------------------------------------------------|-----------------------------------------------------------|--------------------------------------------|
| 31.85396137                                | 548.4198869                                    | 0.056351441                                               | 6.984901564                                |
| 10.11613257                                | 76.93582888                                    | 0.104425062                                               | 6.427202864                                |
| 17.38174775                                | 193.2985658                                    | 0.067532284                                               | 6.974119708                                |
| 26.67870751                                | 300.8065507                                    | 0.060837334                                               | 6.814558944                                |
| 14.41313159                                | 248.6013514                                    | 0.078528037                                               | 6.835347122                                |
| 18.85490358                                | 145.3151515                                    | 0.077956841                                               | 6.628430919                                |
| 18.74059634                                | 260.999823                                     | 0.067665324                                               | 7.05134942                                 |
| 19.46496306                                | 490.6812843                                    | 0.074191895                                               | 6.951646426                                |
| 20.04334114                                | 411.4929608                                    | 0.064721015                                               | 7.094946263                                |
| 19.17763474                                | 606.8330224                                    | 0.069412731                                               | 6.749955607                                |
| 12.34016985                                | 146.2732095                                    | 0.080923844                                               | 6.743983145                                |
| 18.80490944                                | 313.3479393                                    | 0.068896533                                               | 6.902234321                                |
| 15.06041015                                | 271.4033208                                    | 0.102355374                                               | 6.983054753                                |
| 21.5743385                                 | 373.5136867                                    | 0.072708456                                               | 6.953670258                                |
| 20.23563483                                | 300.8150202                                    | 0.073349396                                               | 6.834697539                                |
| 22.03950745                                | 291.5139397                                    | 0.061532449                                               | 6.972313744                                |
| 15.79871229                                | 312.6825796                                    | 0.082423564                                               | 6.558753349                                |
| 13.26020776                                | 106.2035685                                    | 0.09791362                                                | 6.693879241                                |
| 9.46637008                                 | 80.88058552                                    | 0.097720566                                               | 6.621711979                                |
| 21.69169985                                | 248.4029621                                    | 0.062413537                                               | 7.044320584                                |
| 11.33001071                                | 155.2347884                                    | 0.093372727                                               | 6.947837379                                |
| 11.85454214                                | 112.4485635                                    | 0.081071703                                               | 6.455763394                                |
| 14.54403305                                | 139.1367188                                    | 0.083070755                                               | 6.707561748                                |
| 13.4388127                                 | 209.0687571                                    | 0.082065233                                               | 6.91615299                                 |
| 17.10586728                                | 366.7635507                                    | 0.07243252                                                | 6.721237572                                |
| 24.19397483                                | 492.3710426                                    | 0.066334697                                               | 6.886846387                                |
| 25.9062458                                 | 564.281163                                     | 0.068104604                                               | 7.005522174                                |
| 14.81400325                                | 288.3559015                                    | 0.08098687                                                | 6.812000591                                |
| 11.28634846                                | 92.24608501                                    | 0.096687336                                               | 6.257078849                                |
| 10.6065833                                 | 243.6222006                                    | 0.095940284                                               | 6.752930847                                |
| 17.52154686                                | 443.3652795                                    | 0.071911098                                               | 7.109456066                                |
| 11.05245773                                | 367.7675205                                    | 0.120044777                                               | 6.590483198                                |
| 26.77232605                                | 386.5847011                                    | 0.058376871                                               | 7.094270248                                |
| 23.43181983                                | 420.7978723                                    | 0.064539611                                               | 6.975266088                                |
| 16.95986557                                | 350.0472298                                    | 0.069950136                                               | 6.888345792                                |
| 14.88176864                                | 401.1700567                                    | 0.078885359                                               | 6.867853305                                |
| 17.4675513                                 | 570.6589626                                    | 0.097331682                                               | 6.962540234                                |
| 28.37182976                                | 548.5140477                                    | 0.059801161                                               | 7.377762509                                |
| 5.003985062                                | 86.16504065                                    | 0.127391103                                               | 6.25857429                                 |
| 26.98043748                                | 257.4437414                                    | 0.054530291                                               | 7.1374102                                  |
| 17.54804427                                | 426.3546646                                    | 0.090320525                                               | 6.840951047                                |
| 26.93387164                                | 347.7856219                                    | 0.057879832                                               | 6.990480021                                |
| 20.65022393                                | 342.7018889                                    | 0.063419444                                               | 6.893628258                                |
| 16.81688294                                | 281.7029743                                    | 0.075738787                                               | 6.804925384                                |
| 15.37525623                                | 149.1956182                                    | 0.082258811                                               | 6.725508744                                |
| 20.79838541                                | 354.9621129                                    | 0.066447424                                               | 6.994777432                                |
| 15.88220169                                | 322.8461201                                    | 0.076752545                                               | 6.943583883                                |
| 9.491216531                                | 70.90929966                                    | 0.099181299                                               | 6.531808653                                |
| 17.02370198                                | 183.1034078                                    | 0.070564664                                               | 6.764497118                                |
| 12.78295523                                | 104.6279586                                    | 0.087069124                                               | 6.721749824                                |
| 20.70149631                                | 293.1634877                                    | 0.064333087                                               | 6.959183063                                |
| 22.47745102                                | 313.4678137                                    | 0.060447439                                               | 6.880876106                                |
| 14.90102511                                | 229.1872784                                    | 0.078186204                                               | 6.926520155                                |
| 15.57734638                                | 182.1603261                                    | 0.072511355                                               | 6.582159489                                |
| 18.63860083                                | 148.4443609                                    | 0.065924586                                               | 6.752567539                                |
| 13.93299145                                | 443.8041026                                    | 0.084789481                                               | 6.679624653                                |
| 21.57658969                                | 329.8850433                                    | 0.061484016                                               | 6.99867474                                 |
| 19.64768764                                | 437.0451128                                    | 0.077913563                                               | 6.917088773                                |
| 11.29393675                                | 253.3531553                                    | 0.092814032                                               | 6.599366505                                |
| 18.96470832                                | 460.6136488                                    | 0.069259409                                               | 7.279558396                                |
| 15.94475137                                | 205.7944507                                    | 0.087407287                                               | 6.843046954                                |
| 17.87426405                                | 298.2423221                                    | 0.06947804                                                | 6.924428266                                |
| 20.41935634                                | 554.8524788                                    | 0.067737936                                               | 7.002020492                                |
| 20.50735152                                | 407.4451004                                    | 0.071272205                                               | 7.086159923                                |
| 12.0951386                                 | 177.1037975                                    | 0.081954815                                               | 6.509392474                                |
| 17.80863999                                | 482.5113931                                    | 0.083627913                                               | 7.03897051                                 |
| 7.265130415                                | 180.1150307                                    | 0.125585739                                               | 6.608728481                                |
| 21.75839601                                | 457.96                                         | 0.071054592                                               | 7.092532352                                |
| 19.10421345                                | 462.7182858                                    | 0.071112555                                               | 7.010452293                                |
| 10.57217788                                | 206.0990338                                    | 0.090006387                                               | 6.859136623                                |
| 17.26365458                                | 358.361047                                     | 0.07969712                                                | 6.806942301                                |
| 21.18372841                                | 433.7944056                                    | 0.068190892                                               | 7.101856043                                |
| 18.20323803                                | 513.7393594                                    | 0.077262858                                               | 6.843128296                                |
| 22.34163636                                | 312.1398849                                    | 0.063998004                                               | 6.817729887                                |
| 24.93899345                                | 249.9964867                                    | 0.060225778                                               | 7.060203499                                |
| 13.95177083                                | 308.6803279                                    | 0.090862449                                               | 6.690595645                                |
| 10.28392967                                | 160.009182                                     | 0.091802629                                               | 6.845113649                                |
| 15.67370806                                | 158.6983299                                    | 0.088061855                                               | 6.733855146                                |
| 12.22501441                                | 183.2108963                                    | 0.085294399                                               | 6.768857935                                |
| 32.82697155                                | 559.7640017                                    | 0.06148855                                                | 6.962189508                                |
| 33.69524239                                | 547.0628457                                    | 0.056379721                                               | 6.987010073                                |
| 14.57240126                                | 268.282935                                     | 0.09531977                                                | 6.82655306                                 |
| 18.71421619                                | 392.9455491                                    | 0.071604076                                               | 6.950921124                                |
| 13.82334154                                | 281.0761471                                    | 0.085302439                                               | 6.796780211                                |
| 25.45546143                                | 344.0172202                                    | 0.059545069                                               | 7.088785247                                |
| 11.15370614                                | 150.1227154                                    | 0.10172968                                                | 6.720160573                                |
| 24.23326539                                | 378.0675052                                    | 0.068050227                                               | 7.020991838                                |
| 18.05247757                                | 353.1480671                                    | 0.071194978                                               | 6.970881831                                |
| 14.02221205                                | 191.0539617                                    | 0.0807308                                                 | 6.777230742                                |
| 16.06055175                                | 269.774321                                     | 0.079308154                                               | 7.002305007                                |
| 13.91386578                                | 96.52300613                                    | 0.109170932                                               | 6.6157249                                  |
| 22.48763431                                | 217.0327456                                    | 0.060958166                                               | 6.961769724                                |
| 18.10687532                                | 491.2008489                                    | 0.075720805                                               | 6.978486112                                |
| 15.82579054                                | 357.1906061                                    | 0.077604775                                               | 6.886044848                                |
| 15.0559656                                 | 256.0402114                                    | 0.074799957                                               | 6.837126795                                |
| 24.92122584                                | 598.987142                                     | 0.068183456                                               | 7.203766929                                |
| 20.9718776                                 | 196.2687256                                    | 0.065135873                                               | 7.035707127                                |
| 18.44525816                                | 421.1623687                                    | 0.09792202                                                | 6.795919439                                |
| 7.830312728                                | 125.08753                                      | 0.106004405                                               | 6.470154394                                |
| 15.60993724                                | 230.9785244                                    | 0.074282803                                               | 6.935253813                                |

| log.sigma.4.0.mm.3D_gldm_DependenceNonUniformity | log.sigma.4.0.mm.3D_gldm_GrayLevelNonUniformity | log.sigma.4.0.mm.3D_gldm_SmallDependenceEmphasis |
|--------------------------------------------------|-------------------------------------------------|--------------------------------------------------|
| 379.7455231                                      | 119.577568                                      | 0.29250446                                       |
| 117.173262                                       | 97.63743316                                     | 0.153199694                                      |
| 201.7640156                                      | 103.5945241                                     | 0.189565655                                      |
| 161.5854657                                      | 59.43807574                                     | 0.245866559                                      |
| 325.2753378                                      | 185.9543919                                     | 0.197362235                                      |
| 87.53636364                                      | 51.45151515                                     | 0.228476553                                      |
| 803.8529464                                      | 382.3767475                                     | 0.208477551                                      |
| 685.9440094                                      | 378.9722005                                     | 0.192011057                                      |
| 656.6726793                                      | 294.2217334                                     | 0.200561541                                      |
| 159.7985075                                      | 74.41044776                                     | 0.239755626                                      |
| 204.1458886                                      | 122.0331565                                     | 0.192124989                                      |
| 334.4724512                                      | 158.8065076                                     | 0.207421393                                      |
| 177.5302625                                      | 191.0974826                                     | 0.137748123                                      |
| 232.1846243                                      | 124.8404193                                     | 0.206728878                                      |
| 294.4858871                                      | 145.5252016                                     | 0.240168007                                      |
| 693.7637112                                      | 269.2659963                                     | 0.213014479                                      |
| 185.4137353                                      | 98.41373534                                     | 0.218984689                                      |
| 137.6601784                                      | 120.7274939                                     | 0.155003225                                      |
| 155.4468413                                      | 126.8412943                                     | 0.151951766                                      |
| 788.3702635                                      | 324.4879785                                     | 0.220846728                                      |
| 313.1593915                                      | 282.359127                                      | 0.13832663                                       |
| 166.5088044                                      | 87.47636701                                     | 0.174745199                                      |
| 133.8320313                                      | 85.06445313                                     | 0.167509002                                      |
| 339.0083113                                      | 217.2266717                                     | 0.198008856                                      |
| 193.6677141                                      | 92.20659859                                     | 0.237169667                                      |
| 381.6863656                                      | 157.1468974                                     | 0.263031008                                      |
| 478.848438                                       | 220.1821837                                     | 0.228790671                                      |
| 371.3041274                                      | 223.685735                                      | 0.183842593                                      |
| 56.73154362                                      | 43.21923937                                     | 0.176028634                                      |
| 246.8383642                                      | 197.0613437                                     | 0.147998467                                      |
| 600.8507776                                      | 342.1530055                                     | 0.195603438                                      |
| 214.3281779                                      | 248.3726438                                     | 0.141131584                                      |
| 511.5624032                                      | 188.4989161                                     | 0.233549058                                      |
| 355.5421277                                      | 151.6680851                                     | 0.245518634                                      |
| 654.2920073                                      | 308.0603996                                     | 0.226941652                                      |
| 380.9693231                                      | 236.5771924                                     | 0.177343449                                      |
| 396.2174147                                      | 362.1711905                                     | 0.167027831                                      |
| 654.7795001                                      | 308.6337919                                     | 0.197038475                                      |
| 146.6                                            | 156.6910569                                     | 0.111712669                                      |
| 1203.195873                                      | 396.4352132                                     | 0.23500235                                       |
| 308.5281419                                      | 234.2914418                                     | 0.192471846                                      |
| 685.155159                                       | 223.8213085                                     | 0.272831402                                      |
| 593.5239529                                      | 231.6712291                                     | 0.231397471                                      |
| 356.4766881                                      | 188.4381029                                     | 0.211892807                                      |
| 166.1158059                                      | 105.1267606                                     | 0.19844906                                       |
| 395.1253188                                      | 182.3981785                                     | 0.245671342                                      |
| 610.9408154                                      | 350.1451118                                     | 0.1965268                                        |
| 101.5487945                                      | 86.3869116                                      | 0.143002368                                      |
| 125.853114                                       | 60.05052879                                     | 0.203604253                                      |
| 155.3343195                                      | 117.7174556                                     | 0.172217801                                      |
| 395.1697158                                      | 165.2717011                                     | 0.230340092                                      |
| 596.0412341                                      | 203.768318                                      | 0.265047806                                      |
| 595.5070922                                      | 352.7761525                                     | 0.19012327                                       |
| 173.0652174                                      | 80.05253623                                     | 0.230628794                                      |
| 204.8195489                                      | 87.67969925                                     | 0.208147134                                      |
| 270.1579487                                      | 165.3394872                                     | 0.175773246                                      |
| 643.4123609                                      | 248.702843                                      | 0.242142543                                      |
| 463.5471371                                      | 269.4251012                                     | 0.165644856                                      |
| 214.5533981                                      | 152.9575243                                     | 0.194934555                                      |
| 1155.412531                                      | 632.2691423                                     | 0.193512739                                      |
| 204.3340883                                      | 154.3612684                                     | 0.18662228                                       |
| 369.9400749                                      | 185.506367                                      | 0.205728542                                      |
| 861.0922439                                      | 392.134911                                      | 0.234260435                                      |
| 1036.815296                                      | 543.3080152                                     | 0.183654533                                      |
| 114.9493671                                      | 64.7443038                                      | 0.187111375                                      |
| 440.8415329                                      | 322.9709995                                     | 0.165760127                                      |
| 125.6027607                                      | 163.7638037                                     | 0.098757572                                      |
| 868.01952                                        | 444.0912                                        | 0.205821152                                      |
| 818.49189                                        | 416.5062319                                     | 0.231539934                                      |
| 332.7453416                                      | 260.8385093                                     | 0.142670689                                      |
| 166.899923                                       | 103.5265589                                     | 0.189328505                                      |
| 566.560373                                       | 292.5389277                                     | 0.193396501                                      |
| 310.0495832                                      | 176.0820535                                     | 0.199923717                                      |
| 387.9136786                                      | 144.5714918                                     | 0.255152925                                      |
| 495.3564356                                      | 188.5669115                                     | 0.238465166                                      |
| 172.8062593                                      | 121.9374069                                     | 0.184054929                                      |
| 276.0959933                                      | 219.9590985                                     | 0.160358974                                      |
| 111.8893528                                      | 84.36325678                                     | 0.151306246                                      |
| 227.9748096                                      | 145.5975395                                     | 0.175773863                                      |
| 385.5224455                                      | 143.8217187                                     | 0.25986275                                       |
| 356.8139769                                      | 112.139266                                      | 0.303387298                                      |
| 206.4941634                                      | 171.4802668                                     | 0.20454738                                       |
| 460.210156                                       | 234.0737229                                     | 0.189622332                                      |
| 412.6752359                                      | 262.1343964                                     | 0.154429925                                      |
| 382.300533                                       | 145.2304223                                     | 0.229084884                                      |
| 161.2127937                                      | 155.8498695                                     | 0.10910091                                       |
| 347.7102725                                      | 162.2997904                                     | 0.236608091                                      |
| 364.9854121                                      | 195.2166302                                     | 0.221864511                                      |
| 197.7650273                                      | 118.1898907                                     | 0.19381557                                       |
| 244.4034568                                      | 160.5990123                                     | 0.181438652                                      |
| 118.4493865                                      | 142.3588957                                     | 0.13911146                                       |
| 394.0411419                                      | 145.202351                                      | 0.258409061                                      |
| 712.2263168                                      | 392.46093                                       | 0.209246961                                      |
| 455.6345455                                      | 256.0957576                                     | 0.217984945                                      |
| 656.6557904                                      | 325.5294118                                     | 0.192027968                                      |
| 418.9696084                                      | 233.3237873                                     | 0.220170813                                      |
| 424.7337593                                      | 183.4877529                                     | 0.179175745                                      |
| 105.9321872                                      | 102.5243553                                     | 0.150060116                                      |
| 98.24220624                                      | 88.40767386                                     | 0.112438503                                      |
| 757.9670939                                      | 428.908902                                      | 0.193508189                                      |

| log.sigma.4.0.mm.3D_gldm_DependenceNonUniformityNormalized | log.sigma.4.0.mm.3D_gldm_DependenceVariance | log.sigma.4.0.mm.3D_gldm_LargeDependenceEmphasis |
|------------------------------------------------------------|---------------------------------------------|--------------------------------------------------|
| 0.17895642                                                 | 4.542482551                                 | 14.88407163                                      |
| 0.125318997                                                | 7.619178129                                 | 28.70053476                                      |
| 0.131528041                                                | 5.421005662                                 | 22.70795306                                      |
| 0.165389422                                                | 4.08569462                                  | 15.86386899                                      |
| 0.137362896                                                | 5.438503669                                 | 21.64864865                                      |
| 0.132630854                                                | 7.125858586                                 | 23.66363636                                      |
| 0.142249681                                                | 5.815648316                                 | 21.23075562                                      |
| 0.134288177                                                | 5.144766236                                 | 21.80931872                                      |
| 0.144450655                                                | 5.269812286                                 | 20.51517818                                      |
| 0.149065772                                                | 4.955015037                                 | 18.40858209                                      |
| 0.135375258                                                | 5.65371599                                  | 22.31830239                                      |
| 0.145107354                                                | 4.61632234                                  | 19.2681128                                       |
| 0.095088518                                                | 12.031864                                   | 42.56829138                                      |
| 0.135226922                                                | 6.823690194                                 | 23.5730926                                       |
| 0.148430387                                                | 4.919578401                                 | 18.36895161                                      |
| 0.158538325                                                | 4.185719472                                 | 17.37111517                                      |
| 0.155287886                                                | 4.399675654                                 | 17.77051926                                      |
| 0.111646536                                                | 8.903678182                                 | 32.71776156                                      |
| 0.119758738                                                | 6.648668925                                 | 28.10169492                                      |
| 0.151638827                                                | 4.696928009                                 | 18.43065974                                      |
| 0.103558                                                   | 10.08558516                                 | 37.73148148                                      |
| 0.154317706                                                | 3.589940571                                 | 18.84986098                                      |
| 0.130695343                                                | 6.932479858                                 | 25.97070313                                      |
| 0.128072653                                                | 6.977174265                                 | 24.94106536                                      |
| 0.152134889                                                | 4.397544259                                 | 17.44933229                                      |
| 0.161117081                                                | 4.036572365                                 | 15.59772056                                      |
| 0.148112724                                                | 4.532195771                                 | 18.1419734                                       |
| 0.134433066                                                | 5.897003452                                 | 23.14265025                                      |
| 0.126916205                                                | 6.327983224                                 | 25.45637584                                      |
| 0.120174471                                                | 6.653244578                                 | 28.57059396                                      |
| 0.126282215                                                | 6.457610474                                 | 24.48886087                                      |
| 0.103590226                                                | 8.455344272                                 | 34.82696955                                      |
| 0.158427502                                                | 4.246321252                                 | 16.84453391                                      |
| 0.151294522                                                | 5.590819375                                 | 19.01446809                                      |
| 0.148567667                                                | 4.375636755                                 | 17.99046322                                      |
| 0.127032118                                                | 6.690214288                                 | 25.66888963                                      |
| 0.106481434                                                | 9.140902311                                 | 33.24079549                                      |
| 0.126870665                                                | 15.06041176                                 | 36.94380934                                      |
| 0.119186992                                                | 6.346909908                                 | 31.67317073                                      |
| 0.165501496                                                | 3.385790676                                 | 15.1562586                                       |
| 0.118939145                                                | 6.775728224                                 | 26.13030069                                      |
| 0.177180026                                                | 3.179470698                                 | 13.27204551                                      |
| 0.16247576                                                 | 3.361311093                                 | 15.37010676                                      |
| 0.143278412                                                | 4.830261784                                 | 19.56993569                                      |
| 0.129981069                                                | 6.197312898                                 | 23.56494523                                      |
| 0.14394365                                                 | 5.016730535                                 | 18.75664845                                      |
| 0.133919512                                                | 6.0064298                                   | 22.75142481                                      |
| 0.116588742                                                | 6.995545983                                 | 30.14810563                                      |
| 0.147888501                                                | 4.540280944                                 | 19.04465335                                      |
| 0.114892248                                                | 8.312103918                                 | 30.21893491                                      |
| 0.153822388                                                | 4.495673101                                 | 17.68820553                                      |
| 0.176814368                                                | 3.409004209                                 | 13.81637496                                      |
| 0.131982955                                                | 5.452237689                                 | 22.46054965                                      |
| 0.156761972                                                | 4.010698908                                 | 16.69565217                                      |
| 0.153999661                                                | 4.468899316                                 | 18.38796992                                      |
| 0.138542538                                                | 4.674341617                                 | 21.69948718                                      |
| 0.159063624                                                | 4.110566021                                 | 16.34932015                                      |
| 0.134050647                                                | 4.957156204                                 | 22.85656449                                      |
| 0.130190169                                                | 5.636698499                                 | 22.85315534                                      |
| 0.126565071                                                | 9.777118468                                 | 29.31043926                                      |
| 0.115704467                                                | 8.034659973                                 | 28.90600227                                      |
| 0.138554335                                                | 5.417828838                                 | 21.17902622                                      |
| 0.148746285                                                | 5.055823822                                 | 18.72499568                                      |
| 0.136011452                                                | 5.798205955                                 | 22.84861603                                      |
| 0.145505528                                                | 4.149072264                                 | 19.72658228                                      |
| 0.114148507                                                | 9.401011757                                 | 32.21387882                                      |
| 0.096321136                                                | 10.92597341                                 | 45.23466258                                      |
| 0.138883123                                                | 6.172101018                                 | 22.2336                                          |
| 0.139745926                                                | 5.780961297                                 | 20.64760116                                      |
| 0.114818958                                                | 7.967900568                                 | 31.63354037                                      |
| 0.12848339                                                 | 5.89104783                                  | 23.69438029                                      |
| 0.132065355                                                | 6.229101994                                 | 23.51841492                                      |
| 0.136046329                                                | 5.211260414                                 | 21.33435717                                      |
| 0.171719203                                                | 3.469370367                                 | 14.36609119                                      |
| 0.158210296                                                | 4.280228184                                 | 16.76045992                                      |
| 0.128767704                                                | 7.152791505                                 | 25.72876304                                      |
| 0.115232051                                                | 7.732509803                                 | 30.04590985                                      |
| 0.116794732                                                | 8.027549566                                 | 30.80375783                                      |
| 0.133552905                                                | 6.133872414                                 | 24.02870533                                      |
| 0.164823619                                                | 3.493725462                                 | 14.6400171                                       |
| 0.179393654                                                | 4.706255951                                 | 14.92760181                                      |
| 0.114782748                                                | 7.786852742                                 | 27.80489161                                      |
| 0.140780103                                                | 4.945548255                                 | 20.9382074                                       |
| 0.134290672                                                | 4.970097939                                 | 23.74975594                                      |
| 0.156744786                                                | 4.399119407                                 | 17.29602296                                      |
| 0.105230283                                                | 8.73741044                                  | 38.34464752                                      |
| 0.145790471                                                | 5.866603378                                 | 20.0591195                                       |
| 0.133109195                                                | 7.170029809                                 | 23.78264041                                      |
| 0.135085401                                                | 6.263183433                                 | 23.44262295                                      |
| 0.120693065                                                | 7.002326231                                 | 26.67209877                                      |
| 0.090835419                                                | 14.95752569                                 | 48.32055215                                      |
| 0.165424493                                                | 4.098581511                                 | 15.54240134                                      |
| 0.137415843                                                | 5.623587614                                 | 21.40362724                                      |
| 0.138071074                                                | 6.576321763                                 | 22.37333333                                      |
| 0.150885981                                                | 4.195785575                                 | 18.84329044                                      |
| 0.122434135                                                | 7.868060724                                 | 26.10111046                                      |
| 0.150775207                                                | 4.874369809                                 | 20.40362087                                      |
| 0.101176874                                                | 10.02654786                                 | 36.97325692                                      |
| 0.11779641                                                 | 6.167583918                                 | 31.33573141                                      |
| 0.131272444                                                | 5.975787811                                 | 23.23553862                                      |



| log.sigma.4.0.mm.3D_gldm_LargeDependenceLowGrayLevelEmphasis | log.sigma.4.0.mm.3D_gldm_SmallDependenceHighGrayLevelEmphasis | log.sigma.4.0.mm.3D_gldm_LargeDependenceHighGrayLevelEmphasis |
|--------------------------------------------------------------|---------------------------------------------------------------|---------------------------------------------------------------|
| 0.032296295                                                  | 144.1795139                                                   | 8536.749764                                                   |
| 0.651139411                                                  | 13.399632                                                     | 1835.847059                                                   |
| 0.184917034                                                  | 34.86914462                                                   | 4239.308996                                                   |
| 0.102296212                                                  | 75.72912783                                                   | 4636.710338                                                   |
| 0.108069644                                                  | 47.67336158                                                   | 5157.944257                                                   |
| 0.317809724                                                  | 40.23049131                                                   | 2535.066667                                                   |
| 0.124852595                                                  | 57.09011014                                                   | 4763.25783                                                    |
| 0.054426324                                                  | 98.02295045                                                   | 9865.301879                                                   |
| 0.062505309                                                  | 79.7819266                                                    | 8012.093489                                                   |
| 0.03638808                                                   | 141.2768997                                                   | 10650.10354                                                   |
| 0.229252636                                                  | 27.07878659                                                   | 3097.740053                                                   |
| 0.081806915                                                  | 65.88009722                                                   | 5717.000868                                                   |
| 0.196338344                                                  | 38.95922316                                                   | 10243.31976                                                   |
| 0.085412475                                                  | 76.8372102                                                    | 8002.960396                                                   |
| 0.077800585                                                  | 66.34631197                                                   | 5608.217238                                                   |
| 0.093279115                                                  | 63.06110995                                                   | 4658.066956                                                   |
| 0.065065766                                                  | 61.3740787                                                    | 6074.292295                                                   |
| 0.519682545                                                  | 19.17736236                                                   | 2657.227088                                                   |
| 0.587706552                                                  | 12.64856979                                                   | 2073.956086                                                   |
| 0.126570374                                                  | 59.77504453                                                   | 3999.588575                                                   |
| 0.365013499                                                  | 23.26872176                                                   | 4965.380952                                                   |
| 0.338142555                                                  | 19.31546057                                                   | 2009.901761                                                   |
| 0.329027016                                                  | 23.22898283                                                   | 3110.941406                                                   |
| 0.155209938                                                  | 41.45932902                                                   | 4752.690215                                                   |
| 0.057381119                                                  | 81.55263294                                                   | 6098.312647                                                   |
| 0.043343901                                                  | 129.9172903                                                   | 7475.758126                                                   |
| 0.042430916                                                  | 129.3733217                                                   | 9984.643675                                                   |
| 0.099855906                                                  | 52.18090018                                                   | 6181.888125                                                   |
| 0.591559304                                                  | 19.24668897                                                   | 1674.344519                                                   |
| 0.137063918                                                  | 36.19059069                                                   | 6678.244401                                                   |
| 0.066242666                                                  | 85.58553334                                                   | 10251.55359                                                   |
| 0.097072087                                                  | 44.76494809                                                   | 13395.96472                                                   |
| 0.05859675                                                   | 86.24865908                                                   | 6811.038712                                                   |
| 0.056992714                                                  | 98.87396011                                                   | 7741.341702                                                   |
| 0.080531944                                                  | 79.08530654                                                   | 5976.015895                                                   |
| 0.078565095                                                  | 69.85933788                                                   | 9436.821941                                                   |
| 0.064859797                                                  | 93.10480437                                                   | 18396.14673                                                   |
| 0.091298467                                                  | 110.3440715                                                   | 16728.91785                                                   |
| 0.425674845                                                  | 8.482538608                                                   | 2929.130894                                                   |
| 0.138742807                                                  | 61.7240887                                                    | 3736.098762                                                   |
| 0.06732962                                                   | 72.06199654                                                   | 11807.56284                                                   |
| 0.056381532                                                  | 98.24358812                                                   | 4483.095681                                                   |
| 0.061094661                                                  | 75.53233176                                                   | 5178.460443                                                   |
| 0.084202168                                                  | 56.267266                                                     | 5672.895096                                                   |
| 0.259864567                                                  | 34.61096831                                                   | 2813.394366                                                   |
| 0.087902786                                                  | 84.59716552                                                   | 6292.079053                                                   |
| 0.088223231                                                  | 65.75574788                                                   | 6738.995616                                                   |
| 0.844623482                                                  | 11.40265999                                                   | 1682.734788                                                   |
| 0.16231494                                                   | 37.7010162                                                    | 3265.0047                                                     |
| 0.576591035                                                  | 20.50291847                                                   | 2267.431213                                                   |
| 0.121676915                                                  | 63.74490573                                                   | 5085.207863                                                   |
| 0.059818551                                                  | 82.79569318                                                   | 4272.694156                                                   |
| 0.127265576                                                  | 43.45547684                                                   | 4916.559176                                                   |
| 0.135998718                                                  | 41.75466835                                                   | 2780.859601                                                   |
| 0.268435118                                                  | 32.60788223                                                   | 2306.489474                                                   |
| 0.057534607                                                  | 77.23595405                                                   | 9551.375385                                                   |
| 0.066813828                                                  | 76.81200569                                                   | 5330.897157                                                   |
| 0.065257645                                                  | 65.41263814                                                   | 10242.4413                                                    |
| 0.101763196                                                  | 46.41593198                                                   | 5762.98665                                                    |
| 0.077813654                                                  | 87.76450241                                                   | 12332.26399                                                   |
| 0.194820768                                                  | 44.44180925                                                   | 4959.352775                                                   |
| 0.094716751                                                  | 62.69077762                                                   | 5905.810112                                                   |
| 0.098967712                                                  | 128.6383041                                                   | 9777.503714                                                   |
| 0.073976096                                                  | 83.66323951                                                   | 8214.108881                                                   |
| 0.141238224                                                  | 33.15635746                                                   | 3458.387342                                                   |
| 0.082044047                                                  | 84.38128307                                                   | 13897.17478                                                   |
| 0.319321565                                                  | 16.22373261                                                   | 7813.579755                                                   |
| 0.061797136                                                  | 95.2740741                                                    | 9840.21152                                                    |
| 0.049162694                                                  | 97.13283697                                                   | 9778.030903                                                   |
| 0.20368509                                                   | 29.92553913                                                   | 5882.951346                                                   |
| 0.089415398                                                  | 63.27774766                                                   | 8349.177059                                                   |
| 0.070978748                                                  | 84.47658287                                                   | 9191.259207                                                   |
| 0.046644243                                                  | 93.78285984                                                   | 10808.92146                                                   |
| 0.061238568                                                  | 73.54100252                                                   | 4788.042497                                                   |
| 0.122844841                                                  | 65.92784531                                                   | 3837.412009                                                   |
| 0.080993866                                                  | 48.87831599                                                   | 8347.887481                                                   |
| 0.254949035                                                  | 24.87982228                                                   | 4429.022538                                                   |
| 0.316386291                                                  | 29.17946579                                                   | 3776.875783                                                   |
| 0.177714275                                                  | 34.74934215                                                   | 3987.531927                                                   |
| 0.034845108                                                  | 130.9782853                                                   | 9061.548525                                                   |
| 0.035524767                                                  | 149.6138606                                                   | 8562.200101                                                   |
| 0.155353618                                                  | 55.08587687                                                   | 7483.287938                                                   |
| 0.068047523                                                  | 74.92629162                                                   | 7692.902723                                                   |
| 0.110950708                                                  | 40.4276348                                                    | 6869.127563                                                   |
| 0.077463525                                                  | 76.89022488                                                   | 5884.774908                                                   |
| 0.363351209                                                  | 18.2697902                                                    | 4912.276762                                                   |
| 0.06788763                                                   | 81.67840567                                                   | 7830.363522                                                   |
| 0.086142154                                                  | 80.31852444                                                   | 7456.902261                                                   |
| 0.169244762                                                  | 36.29807077                                                   | 4180.605874                                                   |
| 0.127582788                                                  | 46.44877941                                                   | 6879.767407                                                   |
| 1.103847362                                                  | 16.47176043                                                   | 2893.78681                                                    |
| 0.127638514                                                  | 54.03465053                                                   | 3282.116709                                                   |
| 0.049349508                                                  | 94.64835871                                                   | 10552.77561                                                   |
| 0.072575154                                                  | 74.25145028                                                   | 7707.911818                                                   |
| 0.091473242                                                  | 47.41885682                                                   | 4956.995175                                                   |
| 0.055687656                                                  | 129.6444748                                                   | 14462.96084                                                   |
| 0.228096863                                                  | 36.60382632                                                   | 3728.189208                                                   |
| 0.112262124                                                  | 53.32971338                                                   | 16290.06781                                                   |
| 0.303767423                                                  | 11.68554408                                                   | 4158.763789                                                   |
| 0.144999818                                                  | 45.67028478                                                   | 4652.082439                                                   |

| log.sigma.4.0.mm.3D_gldm_SmallDependenceLowGrayLevelEmphasis | log.sigma.4.0.mm.3D_gldm_LowGrayLevelEmphasis | log.sigma.4.0.mm.3D_gldm_DistanceZoneVariabilityNormalized |
|--------------------------------------------------------------|-----------------------------------------------|------------------------------------------------------------|
| 0.001832034                                                  | 0.003681553                                   | 1                                                          |
| 0.005843571                                                  | 0.02993874                                    | 1                                                          |
| 0.003010612                                                  | 0.009534274                                   | 1                                                          |
| 0.002274257                                                  | 0.008712315                                   | 1                                                          |
| 0.001860908                                                  | 0.006050938                                   | 1                                                          |
| 0.00393386                                                   | 0.014719595                                   | 1                                                          |
| 0.001501033                                                  | 0.006320985                                   | 0.995545679                                                |
| 0.00072208                                                   | 0.003001639                                   | 0.998158381                                                |
| 0.001027516                                                  | 0.003466106                                   | 1                                                          |
| 0.001572236                                                  | 0.003003368                                   | 1                                                          |
| 0.002880482                                                  | 0.013028306                                   | 1                                                          |
| 0.001514528                                                  | 0.005197933                                   | 0.992857235                                                |
| 0.001509122                                                  | 0.005927658                                   | 1                                                          |
| 0.001888327                                                  | 0.005237314                                   | 1                                                          |
| 0.002541554                                                  | 0.006962381                                   | 1                                                          |
| 0.001543009                                                  | 0.00594366                                    | 1                                                          |
| 0.002458915                                                  | 0.005925224                                   | 1                                                          |
| 0.004658579                                                  | 0.018256178                                   | 1                                                          |
| 0.005719785                                                  | 0.024726685                                   | 1                                                          |
| 0.00194993                                                   | 0.007431439                                   | 1                                                          |
| 0.001774797                                                  | 0.011438667                                   | 1                                                          |
| 0.004472985                                                  | 0.020984454                                   | 1                                                          |
| 0.00362603                                                   | 0.014855757                                   | 1                                                          |
| 0.002542006                                                  | 0.007619845                                   | 1                                                          |
| 0.001922627                                                  | 0.004437963                                   | 1                                                          |
| 0.001282288                                                  | 0.00415486                                    | 1                                                          |
| 0.001074462                                                  | 0.003085919                                   | 1                                                          |
| 0.001383506                                                  | 0.005037816                                   | 1                                                          |
| 0.005413771                                                  | 0.02075974                                    | 1                                                          |
| 0.001437618                                                  | 0.005637915                                   | 1                                                          |
| 0.000843535                                                  | 0.003017246                                   | 1                                                          |
| 0.001460133                                                  | 0.004200254                                   | 1                                                          |
| 0.00150606                                                   | 0.00465268                                    | 0.997780247                                                |
| 0.001624419                                                  | 0.004220025                                   | 1                                                          |
| 0.001024822                                                  | 0.00478209                                    | 1                                                          |
| 0.001042232                                                  | 0.003599288                                   | 1                                                          |
| 0.000795457                                                  | 0.002569555                                   | 1                                                          |
| 0.000815892                                                  | 0.002749499                                   | 1                                                          |
| 0.003815213                                                  | 0.018841191                                   | 1                                                          |
| 0.00236219                                                   | 0.009440147                                   | 1                                                          |
| 0.00133541                                                   | 0.003897526                                   | 1                                                          |
| 0.001526001                                                  | 0.004758484                                   | 1                                                          |
| 0.001505498                                                  | 0.004715421                                   | 0.998015875                                                |
| 0.001891265                                                  | 0.005775565                                   | 1                                                          |
| 0.003150146                                                  | 0.011703314                                   | 1                                                          |
| 0.001446367                                                  | 0.005903897                                   | 1                                                          |
| 0.001092242                                                  | 0.004474135                                   | 1                                                          |
| 0.004596738                                                  | 0.029427607                                   | 1                                                          |
| 0.003037064                                                  | 0.01173751                                    | 1                                                          |
| 0.00418711                                                   | 0.018324168                                   | 1                                                          |
| 0.002443611                                                  | 0.009296595                                   | 1                                                          |
| 0.001665286                                                  | 0.00497329                                    | 1                                                          |
| 0.001647365                                                  | 0.006744154                                   | 0.997950822                                                |
| 0.003420763                                                  | 0.009794716                                   | 1                                                          |
| 0.004142067                                                  | 0.015580451                                   | 1                                                          |
| 0.000811359                                                  | 0.003680354                                   | 1                                                          |
| 0.001757898                                                  | 0.005044476                                   | 0.996604424                                                |
| 0.001166268                                                  | 0.004048188                                   | 1                                                          |
| 0.002306322                                                  | 0.006250901                                   | 1                                                          |
| 0.000718794                                                  | 0.002816436                                   | 0.999004975                                                |
| 0.002014967                                                  | 0.007425634                                   | 1                                                          |
| 0.001543149                                                  | 0.005184123                                   | 1                                                          |
| 0.000610586                                                  | 0.003408108                                   | 0.998714653                                                |
| 0.000644388                                                  | 0.003442059                                   | 0.993842423                                                |
| 0.002972006                                                  | 0.009090351                                   | 1                                                          |
| 0.000720147                                                  | 0.003152373                                   | 1                                                          |
| 0.001335182                                                  | 0.010147186                                   | 1                                                          |
| 0.000728747                                                  | 0.003384345                                   | 0.997345725                                                |
| 0.001018555                                                  | 0.003006258                                   | 1                                                          |
| 0.00129                                                      | 0.00738059                                    | 1                                                          |
| 0.001786042                                                  | 0.005480325                                   | 1                                                          |
| 0.000917198                                                  | 0.003679609                                   | 1                                                          |
| 0.001313679                                                  | 0.003120327                                   | 1                                                          |
| 0.002323088                                                  | 0.00636974                                    | 1                                                          |
| 0.002141816                                                  | 0.008200277                                   | 1                                                          |
| 0.002261012                                                  | 0.005548961                                   | 1                                                          |
| 0.002394389                                                  | 0.010912876                                   | 1                                                          |
| 0.002680111                                                  | 0.011410056                                   | 1                                                          |
| 0.002127337                                                  | 0.008494877                                   | 1                                                          |
| 0.00152722                                                   | 0.003720029                                   | 1                                                          |
| 0.00208995                                                   | 0.004272416                                   | 1                                                          |
| 0.002373413                                                  | 0.008167117                                   | 1                                                          |
| 0.001078102                                                  | 0.003727472                                   | 1                                                          |
| 0.001393193                                                  | 0.005658022                                   | 1                                                          |
| 0.001516336                                                  | 0.006085175                                   | 1                                                          |
| 0.001833891                                                  | 0.010137547                                   | 1                                                          |
| 0.001890159                                                  | 0.00540965                                    | 0.997005995                                                |
| 0.001465863                                                  | 0.00419959                                    | 1                                                          |
| 0.002537161                                                  | 0.008991988                                   | 1                                                          |
| 0.002927496                                                  | 0.007491546                                   | 1                                                          |
| 0.002923917                                                  | 0.019593815                                   | 1                                                          |
| 0.003430475                                                  | 0.011844432                                   | 1                                                          |
| 0.001108548                                                  | 0.003110894                                   | 0.995279334                                                |
| 0.001364349                                                  | 0.003996095                                   | 1                                                          |
| 0.001595544                                                  | 0.006002544                                   | 1                                                          |
| 0.000922748                                                  | 0.002802763                                   | 1                                                          |
| 0.002968956                                                  | 0.01372836                                    | 1                                                          |
| 0.001292073                                                  | 0.006205292                                   | 1                                                          |
| 0.002596575                                                  | 0.014135276                                   | 1                                                          |
| 0.00205301                                                   | 0.006911421                                   | 1                                                          |

| log.sigma.4.0.mm.3D_gldzm_LowIntensityEmphasis | log.sigma.4.0.mm.3D_gldzm_LargeDistanceEmphasis | log.sigma.4.0.mm.3D_gldzm_HighIntensitySmallDistanceEmphasis |
|------------------------------------------------|-------------------------------------------------|--------------------------------------------------------------|
| 0.005920148                                    | 1                                               | 501.3930481                                                  |
| 0.045536011                                    | 1                                               | 89.72392638                                                  |
| 0.015399947                                    | 1                                               | 190.5227964                                                  |
| 0.010943715                                    | 1                                               | 303.7058824                                                  |
| 0.009263611                                    | 1                                               | 243.0855019                                                  |
| 0.017349614                                    | 1                                               | 181.2044199                                                  |
| 0.007731546                                    | 1.006696429                                     | 282.5126488                                                  |
| 0.004243488                                    | 1.002764977                                     | 521.7354839                                                  |
| 0.004983343                                    | 1                                               | 400.9888164                                                  |
| 0.005880878                                    | 1                                               | 599.0693069                                                  |
| 0.016952116                                    | 1                                               | 143.1857143                                                  |
| 0.007398715                                    | 1.010752688                                     | 318.2392473                                                  |
| 0.011871354                                    | 1                                               | 281.55                                                       |
| 0.009075968                                    | 1                                               | 379.1743341                                                  |
| 0.011261259                                    | 1                                               | 278.675485                                                   |
| 0.00743673                                     | 1                                               | 302.7235849                                                  |
| 0.010226961                                    | 1                                               | 282.3597561                                                  |
| 0.029082044                                    | 1                                               | 130.8847926                                                  |
| 0.037721134                                    | 1                                               | 87.29487179                                                  |
| 0.009152384                                    | 1                                               | 273.2593423                                                  |
| 0.014308795                                    | 1                                               | 174.5491071                                                  |
| 0.028143646                                    | 1                                               | 117.8657407                                                  |
| 0.021402347                                    | 1                                               | 145.7562189                                                  |
| 0.012317904                                    | 1                                               | 214.0650407                                                  |
| 0.007632611                                    | 1                                               | 358.1574344                                                  |
| 0.005662785                                    | 1                                               | 499.3278912                                                  |
| 0.004575671                                    | 1                                               | 570.1892523                                                  |
| 0.007325205                                    | 1                                               | 288.6971714                                                  |
| 0.027929586                                    | 1                                               | 112.6770833                                                  |
| 0.009398262                                    | 1                                               | 248.2910663                                                  |
| 0.00426109                                     | 1                                               | 445.1019802                                                  |
| 0.010127093                                    | 1                                               | 312.6207951                                                  |
| 0.006632873                                    | 1.003333333                                     | 366.2233333                                                  |
| 0.006592942                                    | 1                                               | 400.8718704                                                  |
| 0.00519793                                     | 1                                               | 352.5516637                                                  |
| 0.006132431                                    | 1                                               | 395.45053                                                    |
| 0.004805927                                    | 1                                               | 555.539039                                                   |
| 0.004097885                                    | 1                                               | 561.6010545                                                  |
| 0.039335592                                    | 1                                               | 75.38815789                                                  |
| 0.010954383                                    | 1                                               | 264.1763547                                                  |
| 0.007001043                                    | 1                                               | 368.0566372                                                  |
| 0.005602627                                    | 1                                               | 361.173947                                                   |
| 0.006350858                                    | 1.002979146                                     | 331.4083913                                                  |
| 0.008943109                                    | 1                                               | 262.2516129                                                  |
| 0.015389814                                    | 1                                               | 179.0241379                                                  |
| 0.00678932                                     | 1                                               | 350.2373096                                                  |
| 0.00586404                                     | 1                                               | 341.4250239                                                  |
| 0.036243256                                    | 1                                               | 85.3381295                                                   |
| 0.017019593                                    | 1                                               | 192.3701923                                                  |
| 0.023072955                                    | 1                                               | 126.2391304                                                  |
| 0.011774967                                    | 1                                               | 276.4741379                                                  |
| 0.006118789                                    | 1                                               | 314.4009132                                                  |
| 0.009173434                                    | 1.003076923                                     | 233.7325641                                                  |
| 0.014366038                                    | 1                                               | 190.4713805                                                  |
| 0.020182761                                    | 1                                               | 160.9306358                                                  |
| 0.005729357                                    | 1                                               | 443.9309463                                                  |
| 0.007083029                                    | 1.005102041                                     | 319.1943027                                                  |
| 0.007445801                                    | 1                                               | 390.4514107                                                  |
| 0.011527048                                    | 1                                               | 239.172043                                                   |
| 0.003708237                                    | 1.00149328                                      | 452.9432554                                                  |
| 0.010385532                                    | 1                                               | 246.7640751                                                  |
| 0.007301786                                    | 1                                               | 308.6410658                                                  |
| 0.003141387                                    | 1.00192926                                      | 558.1789389                                                  |
| 0.003899668                                    | 1.009264978                                     | 464.6772699                                                  |
| 0.014913228                                    | 1                                               | 183.2674419                                                  |
| 0.00496668                                     | 1                                               | 516.1772853                                                  |
| 0.0193189                                      | 1                                               | 162.8857143                                                  |
| 0.004071277                                    | 1.003986711                                     | 464.7450166                                                  |
| 0.004339606                                    | 1                                               | 420.5073482                                                  |
| 0.01003209                                     | 1                                               | 212.8402626                                                  |
| 0.009822668                                    | 1                                               | 339.7735192                                                  |
| 0.005425838                                    | 1                                               | 444.0541712                                                  |
| 0.006120175                                    | 1                                               | 477.7721281                                                  |
| 0.009220668                                    | 1                                               | 290.6193182                                                  |
| 0.009452177                                    | 1                                               | 277.1303855                                                  |
| 0.01157062                                     | 1                                               | 266.9726027                                                  |
| 0.01578721                                     | 1                                               | 156.9555035                                                  |
| 0.017457192                                    | 1                                               | 204.0764706                                                  |
| 0.012237213                                    | 1                                               | 200.1652174                                                  |
| 0.005715534                                    | 1                                               | 500.8185654                                                  |
| 0.006675826                                    | 1                                               | 501.1145975                                                  |
| 0.013242067                                    | 1                                               | 267.2720764                                                  |
| 0.005777723                                    | 1                                               | 395.3475073                                                  |
| 0.009253253                                    | 1                                               | 260.9254302                                                  |
| 0.007511184                                    | 1                                               | 337.6065089                                                  |
| 0.018595618                                    | 1                                               | 172.55                                                       |
| 0.008289735                                    | 1.004497751                                     | 343.618066                                                   |
| 0.006160028                                    | 1                                               | 375.615495                                                   |
| 0.013195233                                    | 1                                               | 192.6850153                                                  |
| 0.015490807                                    | 1                                               | 258.1639723                                                  |
| 0.020467134                                    | 1                                               | 122.9609756                                                  |
| 0.01501357                                     | 1                                               | 214.9155496                                                  |
| 0.005148574                                    | 1.007097792                                     | 455.876183                                                   |
| 0.006115288                                    | 1                                               | 342.8300733                                                  |
| 0.008504181                                    | 1                                               | 244.469223                                                   |
| 0.004307946                                    | 1                                               | 593.566706                                                   |
| 0.017579947                                    | 1                                               | 209.8595318                                                  |
| 0.012167584                                    | 1                                               | 345.4043716                                                  |
| 0.027725114                                    | 1                                               | 104.7837838                                                  |
| 0.010546367                                    | 1                                               | 244.5904685                                                  |

| log.sigma.4.0.mm.3D_gldzm_LowIntensityLargeDistanceEmphasis | log.sigma.4.0.mm.3D_gldzm_HighIntensityEmphasis | log.sigma.4.0.mm.3D_gldzm_DistanceZoneVariability | log.sigma.4.0.mm.3D_gldzm_ZonePercentage |
|-------------------------------------------------------------|-------------------------------------------------|---------------------------------------------------|------------------------------------------|
| 0.005920148                                                 | 501.3930481                                     | 748                                               | 0.352497644                              |
| 0.045536011                                                 | 89.72392638                                     | 163                                               | 0.174331551                              |
| 0.015399947                                                 | 190.5227964                                     | 329                                               | 0.214471969                              |
| 0.010943715                                                 | 303.7058824                                     | 289                                               | 0.29580348                               |
| 0.009263611                                                 | 243.0855019                                     | 538                                               | 0.227195946                              |
| 0.017349614                                                 | 181.2044199                                     | 181                                               | 0.274242424                              |
| 0.007759516                                                 | 282.9970238                                     | 1338.013393                                       | 0.237834012                              |
| 0.004249201                                                 | 522.0700461                                     | 1083.001843                                       | 0.212411903                              |
| 0.004983343                                                 | 400.9888164                                     | 1073                                              | 0.236031676                              |
| 0.005880878                                                 | 599.0693069                                     | 303                                               | 0.282649254                              |
| 0.016952116                                                 | 143.1857143                                     | 350                                               | 0.232095491                              |
| 0.00748758                                                  | 318.5645161                                     | 554.0143369                                       | 0.24208243                               |
| 0.011871354                                                 | 281.55                                          | 280                                               | 0.149973219                              |
| 0.009075968                                                 | 379.1743341                                     | 413                                               | 0.240535818                              |
| 0.011261259                                                 | 278.675485                                      | 567                                               | 0.28578629                               |
| 0.00743673                                                  | 302.7235849                                     | 1060                                              | 0.242230347                              |
| 0.010226961                                                 | 282.3597561                                     | 328                                               | 0.274706868                              |
| 0.029082044                                                 | 130.8847926                                     | 217                                               | 0.175993512                              |
| 0.037721134                                                 | 87.29487179                                     | 234                                               | 0.18027735                               |
| 0.009152384                                                 | 273.2593423                                     | 1338                                              | 0.257357184                              |
| 0.014308795                                                 | 174.5491071                                     | 448                                               | 0.148148148                              |
| 0.028143646                                                 | 117.8657407                                     | 216                                               | 0.200185357                              |
| 0.021402347                                                 | 145.7562189                                     | 201                                               | 0.196289063                              |
| 0.012317904                                                 | 214.0650407                                     | 615                                               | 0.232338496                              |
| 0.007632611                                                 | 358.1574344                                     | 343                                               | 0.269442262                              |
| 0.005662785                                                 | 499.3278912                                     | 735                                               | 0.310257493                              |
| 0.004575671                                                 | 570.1892523                                     | 856                                               | 0.264760564                              |
| 0.007325205                                                 | 288.6971714                                     | 601                                               | 0.217595945                              |
| 0.027929586                                                 | 112.6770833                                     | 96                                                | 0.214765101                              |
| 0.009398262                                                 | 248.2910663                                     | 347                                               | 0.168938656                              |
| 0.00426109                                                  | 445.1019802                                     | 1010                                              | 0.212274065                              |
| 0.010127093                                                 | 312.6207951                                     | 327                                               | 0.158047366                              |
| 0.006725465                                                 | 366.2533333                                     | 898.0022222                                       | 0.278724063                              |
| 0.006592942                                                 | 400.8718704                                     | 679                                               | 0.28893617                               |
| 0.00519793                                                  | 352.5516637                                     | 1142                                              | 0.259309718                              |
| 0.006132431                                                 | 395.45053                                       | 566                                               | 0.188729577                              |
| 0.004805927                                                 | 555.539039                                      | 666                                               | 0.178984144                              |
| 0.004097885                                                 | 561.6010545                                     | 1138                                              | 0.220499903                              |
| 0.039335592                                                 | 75.38815789                                     | 152                                               | 0.123577236                              |
| 0.010954383                                                 | 264.1763547                                     | 2030                                              | 0.279229711                              |
| 0.007001043                                                 | 368.0566372                                     | 565                                               | 0.217810332                              |
| 0.005602627                                                 | 361.173947                                      | 1282                                              | 0.331523145                              |
| 0.006361166                                                 | 331.6236346                                     | 1005.001986                                       | 0.275663838                              |
| 0.008943109                                                 | 262.2516129                                     | 620                                               | 0.249196141                              |
| 0.015389814                                                 | 179.0241379                                     | 290                                               | 0.226917058                              |
| 0.00678932                                                  | 350.2373096                                     | 788                                               | 0.287067395                              |
| 0.00586404                                                  | 341.4250239                                     | 1047                                              | 0.229504603                              |
| 0.036243256                                                 | 85.3381295                                      | 139                                               | 0.159586682                              |
| 0.017019593                                                 | 192.3701923                                     | 208                                               | 0.244418331                              |
| 0.023072955                                                 | 126.2391304                                     | 276                                               | 0.204142012                              |
| 0.011774967                                                 | 276.4741379                                     | 696                                               | 0.270922538                              |
| 0.006118789                                                 | 314.4009132                                     | 1095                                              | 0.324829427                              |
| 0.009184081                                                 | 233.9548718                                     | 973.0020513                                       | 0.216090426                              |
| 0.014366038                                                 | 190.4713805                                     | 297                                               | 0.269021739                              |
| 0.020182761                                                 | 160.9306358                                     | 346                                               | 0.260150376                              |
| 0.005729357                                                 | 443.9309463                                     | 391                                               | 0.200512821                              |
| 0.007097162                                                 | 319.6547619                                     | 1172.006803                                       | 0.290729295                              |
| 0.007445801                                                 | 390.4514107                                     | 638                                               | 0.184499711                              |
| 0.011527048                                                 | 239.172043                                      | 372                                               | 0.225728155                              |
| 0.003715856                                                 | 453.0164261                                     | 2007.000996                                       | 0.220067915                              |
| 0.010385532                                                 | 246.7640751                                     | 373                                               | 0.211211778                              |
| 0.007301786                                                 | 308.6410658                                     | 638                                               | 0.238951311                              |
| 0.003148063                                                 | 558.318328                                      | 1553.001286                                       | 0.268612887                              |
| 0.003927758                                                 | 465.4694256                                     | 1609.030883                                       | 0.212383576                              |
| 0.014913228                                                 | 183.2674419                                     | 172                                               | 0.217721519                              |
| 0.00496668                                                  | 516.1772853                                     | 722                                               | 0.186949767                              |
| 0.0193189                                                   | 162.8857143                                     | 140                                               | 0.107361963                              |
| 0.004082951                                                 | 465.0863787                                     | 1501.005316                                       | 0.2408                                   |
| 0.004339606                                                 | 420.5073482                                     | 1565                                              | 0.267201639                              |
| 0.01003209                                                  | 212.8402626                                     | 457                                               | 0.157694962                              |
| 0.009822668                                                 | 339.7735192                                     | 287                                               | 0.220939184                              |
| 0.005425838                                                 | 444.0541712                                     | 923                                               | 0.215151515                              |
| 0.006120175                                                 | 477.7721281                                     | 531                                               | 0.232996928                              |
| 0.009220668                                                 | 290.6193182                                     | 704                                               | 0.31164232                               |
| 0.009452177                                                 | 277.1303855                                     | 882                                               | 0.281699138                              |
| 0.01157062                                                  | 266.9726027                                     | 292                                               | 0.217585693                              |
| 0.01578721                                                  | 156.9555035                                     | 427                                               | 0.178213689                              |
| 0.017457192                                                 | 204.0764706                                     | 170                                               | 0.177453027                              |
| 0.012237213                                                 | 200.1652174                                     | 345                                               | 0.202108963                              |
| 0.005715534                                                 | 500.8185654                                     | 711                                               | 0.303976058                              |
| 0.006675826                                                 | 501.1145975                                     | 733                                               | 0.368526898                              |
| 0.013242067                                                 | 267.2720764                                     | 419                                               | 0.232907171                              |
| 0.005777723                                                 | 395.3475073                                     | 682                                               | 0.208626491                              |
| 0.009253253                                                 | 260.9254302                                     | 523                                               | 0.170191995                              |
| 0.007511184                                                 | 337.6065089                                     | 676                                               | 0.277162772                              |
| 0.018595618                                                 | 172.55                                          | 160                                               | 0.104438642                              |
| 0.008296931                                                 | 344.3208396                                     | 665.0029985                                       | 0.27966457                               |
| 0.006160028                                                 | 375.615495                                      | 697                                               | 0.254194019                              |
| 0.013195233                                                 | 192.6850153                                     | 327                                               | 0.223360656                              |
| 0.015490807                                                 | 258.1639723                                     | 433                                               | 0.21382716                               |
| 0.020467134                                                 | 122.9609756                                     | 205                                               | 0.157208589                              |
| 0.01501357                                                  | 214.9155496                                     | 746                                               | 0.3131822                                |
| 0.00517436                                                  | 456.3706625                                     | 1262.014196                                       | 0.244645958                              |
| 0.006115288                                                 | 342.8300733                                     | 818                                               | 0.247878788                              |
| 0.008504181                                                 | 244.469223                                      | 991                                               | 0.227711397                              |
| 0.004307946                                                 | 593.566706                                      | 847                                               | 0.247516072                              |
| 0.017579947                                                 | 209.8595318                                     | 598                                               | 0.21228257                               |
| 0.012167584                                                 | 345.4043716                                     | 183                                               | 0.1747851                                |
| 0.027725114                                                 | 104.7837838                                     | 111                                               | 0.133093525                              |
| 0.010546367                                                 | 244.5904685                                     | 1238                                              | 0.214409422                              |

| log.sigma.4.0.mm.3D_gldzm_IntensityVariabilityNormalized | log.sigma.4.0.mm.3D_gldzm_LowIntensitySmallDistanceEmphasis | log.sigma.4.0.mm.3D_gldzm_IntensityVariability |
|----------------------------------------------------------|-------------------------------------------------------------|------------------------------------------------|
| 0.043788784                                              | 0.005920148                                                 | 32.7540107                                     |
| 0.073280891                                              | 0.045536011                                                 | 11.94478528                                    |
| 0.059007215                                              | 0.015399947                                                 | 19.41337386                                    |
| 0.051352354                                              | 0.010943715                                                 | 14.84083045                                    |
| 0.06133829                                               | 0.009263611                                                 | 33                                             |
| 0.061383963                                              | 0.017349614                                                 | 11.11049724                                    |
| 0.055939759                                              | 0.007724553                                                 | 75.18303571                                    |
| 0.047602625                                              | 0.00424206                                                  | 51.64884793                                    |
| 0.054268589                                              | 0.004983343                                                 | 58.23019571                                    |
| 0.058262262                                              | 0.005880878                                                 | 17.65346535                                    |
| 0.068783673                                              | 0.016952116                                                 | 24.07428571                                    |
| 0.057392634                                              | 0.007376499                                                 | 32.02508961                                    |
| 0.052933673                                              | 0.011871354                                                 | 14.82142857                                    |
| 0.04632143                                               | 0.009075968                                                 | 19.13075061                                    |
| 0.051345458                                              | 0.011261259                                                 | 29.11287478                                    |
| 0.054047704                                              | 0.00743673                                                  | 57.29056604                                    |
| 0.064396193                                              | 0.010226961                                                 | 21.12195122                                    |
| 0.063008346                                              | 0.029082044                                                 | 13.67281106                                    |
| 0.084228212                                              | 0.037721134                                                 | 19.70940171                                    |
| 0.050112722                                              | 0.009152384                                                 | 67.05082212                                    |
| 0.067891024                                              | 0.014308795                                                 | 30.41517857                                    |
| 0.073045267                                              | 0.028143646                                                 | 15.77777778                                    |
| 0.063736046                                              | 0.021402347                                                 | 12.81094527                                    |
| 0.061347082                                              | 0.012317904                                                 | 37.72845528                                    |
| 0.054492601                                              | 0.007632611                                                 | 18.6909621                                     |
| 0.047967051                                              | 0.005662785                                                 | 35.25578231                                    |
| 0.046338654                                              | 0.004575671                                                 | 39.66588785                                    |
| 0.060301605                                              | 0.007325205                                                 | 36.24126456                                    |
| 0.080078125                                              | 0.027929586                                                 | 7.6875                                         |
| 0.063990233                                              | 0.009398262                                                 | 22.20461095                                    |
| 0.054098618                                              | 0.00426109                                                  | 54.63960396                                    |
| 0.063752583                                              | 0.010127093                                                 | 20.8470948                                     |
| 0.046617284                                              | 0.006609725                                                 | 41.95555556                                    |
| 0.050431523                                              | 0.006592942                                                 | 34.24300442                                    |
| 0.060150411                                              | 0.00519793                                                  | 68.69176883                                    |
| 0.056761852                                              | 0.006132431                                                 | 32.12720848                                    |
| 0.047678309                                              | 0.004805927                                                 | 31.75375375                                    |
| 0.045581463                                              | 0.004097885                                                 | 51.87170475                                    |
| 0.096520083                                              | 0.039335592                                                 | 14.67105263                                    |
| 0.048854376                                              | 0.010954383                                                 | 99.17438424                                    |
| 0.051953951                                              | 0.007001043                                                 | 29.3539823                                     |
| 0.050235956                                              | 0.005602627                                                 | 64.4024961                                     |
| 0.054507228                                              | 0.006348281                                                 | 54.88877855                                    |
| 0.057122789                                              | 0.008943109                                                 | 35.41612903                                    |
| 0.06216409                                               | 0.015389814                                                 | 18.02758621                                    |
| 0.052590894                                              | 0.00678932                                                  | 41.44162437                                    |
| 0.055203889                                              | 0.00586404                                                  | 57.79847182                                    |
| 0.083898349                                              | 0.036243256                                                 | 11.6618705                                     |
| 0.058848003                                              | 0.017019593                                                 | 12.24038462                                    |
| 0.073802773                                              | 0.023072955                                                 | 20.36956522                                    |
| 0.055683545                                              | 0.011774967                                                 | 38.75574713                                    |
| 0.052877129                                              | 0.006118789                                                 | 57.90045662                                    |
| 0.058219592                                              | 0.009170773                                                 | 56.76410256                                    |
| 0.061048192                                              | 0.014366038                                                 | 18.13131313                                    |
| 0.060509873                                              | 0.020182761                                                 | 20.93641618                                    |
| 0.058745037                                              | 0.005729357                                                 | 22.96930946                                    |
| 0.051322655                                              | 0.007079496                                                 | 60.35544218                                    |
| 0.048491072                                              | 0.007445801                                                 | 30.93730408                                    |
| 0.06019482                                               | 0.011527048                                                 | 22.39247312                                    |
| 0.054241478                                              | 0.003706333                                                 | 108.9711299                                    |
| 0.054474624                                              | 0.010385532                                                 | 20.31903485                                    |
| 0.059909985                                              | 0.007301786                                                 | 38.22257053                                    |
| 0.054649145                                              | 0.003139718                                                 | 84.97942122                                    |
| 0.050942693                                              | 0.003892645                                                 | 82.47621989                                    |
| 0.066590049                                              | 0.014913228                                                 | 11.45348837                                    |
| 0.049443298                                              | 0.00496668                                                  | 35.69806094                                    |
| 0.07744898                                               | 0.0193189                                                   | 10.84285714                                    |
| 0.047762387                                              | 0.004068359                                                 | 71.88239203                                    |
| 0.052216926                                              | 0.004339606                                                 | 81.71948882                                    |
| 0.070744892                                              | 0.01003209                                                  | 32.33041575                                    |
| 0.057533781                                              | 0.009822668                                                 | 16.51219512                                    |
| 0.050129764                                              | 0.005425838                                                 | 46.26977248                                    |
| 0.052961225                                              | 0.006120175                                                 | 28.12241055                                    |
| 0.051257425                                              | 0.009220668                                                 | 36.08522727                                    |
| 0.052010222                                              | 0.009452177                                                 | 45.87301587                                    |
| 0.06004879                                               | 0.01157062                                                  | 17.53424658                                    |
| 0.067751153                                              | 0.01578721                                                  | 28.92974239                                    |
| 0.056401384                                              | 0.017457192                                                 | 9.588235294                                    |
| 0.064499055                                              | 0.012237213                                                 | 22.25217391                                    |
| 0.045740929                                              | 0.005715534                                                 | 32.52180028                                    |
| 0.044011696                                              | 0.006675826                                                 | 32.26057299                                    |
| 0.053992629                                              | 0.013242067                                                 | 22.62291169                                    |
| 0.049651276                                              | 0.005777723                                                 | 33.86217009                                    |
| 0.060399446                                              | 0.009253253                                                 | 31.58891013                                    |
| 0.049381149                                              | 0.007511184                                                 | 33.3816568                                     |
| 0.073984375                                              | 0.018595618                                                 | 11.8375                                        |
| 0.049290947                                              | 0.008287936                                                 | 32.87706147                                    |
| 0.055793532                                              | 0.006160028                                                 | 38.88809182                                    |
| 0.063827399                                              | 0.013195233                                                 | 20.87155963                                    |
| 0.053256458                                              | 0.015490807                                                 | 23.06004619                                    |
| 0.078548483                                              | 0.020467134                                                 | 16.10243902                                    |
| 0.053637272                                              | 0.01501357                                                  | 40.01340483                                    |
| 0.052755774                                              | 0.005142127                                                 | 66.89432177                                    |
| 0.056739857                                              | 0.006115288                                                 | 46.41320293                                    |
| 0.060226193                                              | 0.008504181                                                 | 59.68415742                                    |
| 0.047706399                                              | 0.004307946                                                 | 40.40731995                                    |
| 0.052398743                                              | 0.017579947                                                 | 31.33444816                                    |
| 0.054435785                                              | 0.012167584                                                 | 9.961748634                                    |
| 0.08465222                                               | 0.027725114                                                 | 9.396396396                                    |
| 0.059593748                                              | 0.010546367                                                 | 73.77705977                                    |

| log.sigma.4.0.mm.3D_gldzm_HighIntensityLargeDistanceEmphasis | log.sigma.4.0.mm.3D_gldzm_SmallDistanceEmphasis | log.sigma.4.0.mm.3D_glcm_SumVariance | log.sigma.4.0.mm.3D_glcm_Homogeneity1 |
|--------------------------------------------------------------|-------------------------------------------------|--------------------------------------|---------------------------------------|
| 501.3930481                                                  |                                                 | 1696.311792                          | 0.365581598                           |
| 89.72392638                                                  |                                                 | 178.6263377                          | 0.494766352                           |
| 190.5227964                                                  |                                                 | 527.2690192                          | 0.457613043                           |
| 303.7058824                                                  |                                                 | 886.5215511                          | 0.394465496                           |
| 243.0855019                                                  |                                                 | 717.3906004                          | 0.442402855                           |
| 181.2044199                                                  |                                                 | 367.0991896                          | 0.442253847                           |
| 284.9345238                                                  | 0.998325893                                     | 746.3012584                          | 0.426406607                           |
| 523.4082949                                                  | 0.999308756                                     | 1521.685423                          | 0.442441424                           |
| 400.9888164                                                  |                                                 | 1266.313554                          | 0.423026071                           |
| 599.0693069                                                  |                                                 | 1948.790066                          | 0.420424075                           |
| 143.1857143                                                  |                                                 | 392.2117723                          | 0.462689193                           |
| 319.8655914                                                  | 0.997311828                                     | 921.4751659                          | 0.429356988                           |
| 281.55                                                       |                                                 | 814.1499304                          | 0.514821902                           |
| 379.1743341                                                  |                                                 | 1140.838251                          | 0.430649081                           |
| 278.675485                                                   |                                                 | 900.3215777                          | 0.405791619                           |
| 302.7235849                                                  |                                                 | 848.2483968                          | 0.400507934                           |
| 282.3597561                                                  |                                                 | 941.1216218                          | 0.420565869                           |
| 130.8847926                                                  |                                                 | 269.0582679                          | 0.490050703                           |
| 87.29487179                                                  |                                                 | 189.7860597                          | 0.491085837                           |
| 273.2593423                                                  |                                                 | 694.7557776                          | 0.417673484                           |
| 174.5491071                                                  |                                                 | 411.2746967                          | 0.514690884                           |
| 117.8657407                                                  |                                                 | 279.5274517                          | 0.452755169                           |
| 145.7562189                                                  |                                                 | 360.1985733                          | 0.470848086                           |
| 214.0650407                                                  |                                                 | 604.3226661                          | 0.463578922                           |
| 358.1574344                                                  |                                                 | 1141.470495                          | 0.400045463                           |
| 499.3278912                                                  |                                                 | 1488.148354                          | 0.397844629                           |
| 570.1892523                                                  |                                                 | 1797.972051                          | 0.405966143                           |
| 288.6971714                                                  |                                                 | 858.9501859                          | 0.445607235                           |
| 112.6770833                                                  |                                                 | 222.172871                           | 0.480276853                           |
| 248.2910663                                                  |                                                 | 705.8912732                          | 0.493463025                           |
| 445.1019802                                                  |                                                 | 1373.268092                          | 0.44430451                            |
| 312.6207951                                                  |                                                 | 1165.891689                          | 0.492563285                           |
| 366.3733333                                                  | 0.999166667                                     | 1158.768507                          | 0.398867408                           |
| 400.8718704                                                  |                                                 | 1283.239095                          | 0.402590656                           |
| 352.5516637                                                  |                                                 | 1061.607883                          | 0.42253081                            |
| 395.45053                                                    |                                                 | 1247.207917                          | 0.453781527                           |
| 555.539039                                                   |                                                 | 1857.649983                          | 0.477505619                           |
| 561.6010545                                                  |                                                 | 1723.428424                          | 0.442614304                           |
| 75.38815789                                                  |                                                 | 216.3596673                          | 0.517234078                           |
| 264.1763547                                                  |                                                 | 728.3372549                          | 0.395521702                           |
| 368.0566372                                                  |                                                 | 1334.752055                          | 0.446524295                           |
| 361.173947                                                   |                                                 | 1024.630631                          | 0.372424845                           |
| 332.4846077                                                  | 0.999255214                                     | 1041.419565                          | 0.391621408                           |
| 262.2516129                                                  |                                                 | 828.1615246                          | 0.418389568                           |
| 179.0241379                                                  |                                                 | 384.5155774                          | 0.4603346                             |
| 350.2373096                                                  |                                                 | 1078.69334                           | 0.416261746                           |
| 341.4250239                                                  |                                                 | 969.3913993                          | 0.440820138                           |
| 85.3381295                                                   |                                                 | 157.8563415                          | 0.510737181                           |
| 192.3701923                                                  |                                                 | 477.6095442                          | 0.441629091                           |
| 126.2391304                                                  |                                                 | 250.5802383                          | 0.487362087                           |
| 276.4741379                                                  |                                                 | 864.9554163                          | 0.408013308                           |
| 314.4009132                                                  |                                                 | 926.3164941                          | 0.378501153                           |
| 234.8441026                                                  | 0.999230769                                     | 654.0279916                          | 0.45187524                            |
| 190.4713805                                                  |                                                 | 503.3140154                          | 0.408829799                           |
| 160.9306358                                                  |                                                 | 386.259673                           | 0.425817987                           |
| 443.9309463                                                  |                                                 | 1371.540794                          | 0.448677919                           |
| 321.4965986                                                  | 0.998724449                                     | 983.8334506                          | 0.39770519                            |
| 390.4514107                                                  |                                                 | 1358.473055                          | 0.443142736                           |
| 239.172043                                                   |                                                 | 754.4837764                          | 0.453449982                           |
| 453.309109                                                   | 0.99962668                                      | 1427.850563                          | 0.444021794                           |
| 246.7640751                                                  |                                                 | 578.1779095                          | 0.477651636                           |
| 308.6410658                                                  |                                                 | 883.1434173                          | 0.432216508                           |
| 558.8758842                                                  | 0.999517685                                     | 1756.240747                          | 0.417882986                           |
| 468.6380482                                                  | 0.997683755                                     | 1213.977068                          | 0.44133528                            |
| 183.2674419                                                  |                                                 | 480.0263867                          | 0.446746219                           |
| 516.1772853                                                  |                                                 | 1495.30253                           | 0.473705629                           |
| 162.8857143                                                  |                                                 | 518.1867766                          | 0.542337436                           |
| 466.4518272                                                  | 0.999003322                                     | 1406.683311                          | 0.428057759                           |
| 420.5073482                                                  |                                                 | 1489.365808                          | 0.442209655                           |
| 212.8402626                                                  |                                                 | 583.8329175                          | 0.499708461                           |
| 339.7735192                                                  |                                                 | 1111.149262                          | 0.440257234                           |
| 444.0541712                                                  |                                                 | 1329.979203                          | 0.444688456                           |
| 477.7721281                                                  |                                                 | 1621.253539                          | 0.43478774                            |
| 290.6193182                                                  |                                                 | 926.3341969                          | 0.381625461                           |
| 277.1303855                                                  |                                                 | 700.0944234                          | 0.402283061                           |
| 266.9726027                                                  |                                                 | 923.209034                           | 0.457989966                           |
| 156.9555035                                                  |                                                 | 439.4138984                          | 0.497348048                           |
| 204.0764706                                                  |                                                 | 423.4151712                          | 0.489986125                           |
| 200.1652174                                                  |                                                 | 497.6456869                          | 0.468347148                           |
| 500.8185654                                                  |                                                 | 1737.2635                            | 0.380629535                           |
| 501.1145975                                                  |                                                 | 1693.568004                          | 0.370886702                           |
| 267.2720764                                                  |                                                 | 790.1882153                          | 0.466486225                           |
| 395.3475073                                                  |                                                 | 1226.863042                          | 0.433118079                           |
| 260.9254302                                                  |                                                 | 833.8282939                          | 0.467496152                           |
| 337.6065089                                                  |                                                 | 1019.903577                          | 0.400186851                           |
| 172.55                                                       |                                                 | 402.6076577                          | 0.530563921                           |
| 347.131934                                                   | 0.998875562                                     | 1147.207941                          | 0.407012066                           |
| 375.615495                                                   |                                                 | 1063.855551                          | 0.437830241                           |
| 192.6850153                                                  |                                                 | 517.7997909                          | 0.458048391                           |
| 258.1639723                                                  |                                                 | 787.921079                           | 0.467367334                           |
| 122.9609756                                                  |                                                 | 234.6611726                          | 0.535826751                           |
| 214.9155496                                                  |                                                 | 625.3833751                          | 0.401389975                           |
| 458.3485804                                                  | 0.998225552                                     | 1514.994393                          | 0.429212173                           |
| 342.8300733                                                  |                                                 | 1089.484284                          | 0.429902861                           |
| 244.469223                                                   |                                                 | 741.7671684                          | 0.43170354                            |
| 593.566706                                                   |                                                 | 1922.667202                          | 0.443094935                           |
| 209.8595318                                                  |                                                 | 528.0767239                          | 0.444134964                           |
| 345.4043716                                                  |                                                 | 1326.664639                          | 0.493383297                           |
| 104.7837838                                                  |                                                 | 323.3230607                          | 0.517904123                           |
| 244.5904685                                                  |                                                 | 652.5848495                          | 0.448081249                           |

| log.sigma.4.0.mm.3D_glcml_Homogeneity2 | log.sigma.4.0.mm.3D_glcml_ClusterShade | log.sigma.4.0.mm.3D_glcml_MaximumProbability | log.sigma.4.0.mm.3D_glcml_Ldmn | log.sigma.4.0.mm.3D_glcml_SumVariance2 |
|----------------------------------------|----------------------------------------|----------------------------------------------|--------------------------------|----------------------------------------|
| 0.282134236                            | -619.3522803                           | 0.020652921                                  | 0.984707535                    | 109.4351351                            |
| 0.433403858                            | 117.1872354                            | 0.07143873                                   | 0.982588989                    | 33.70767393                            |
| 0.387290081                            | 100.8446922                            | 0.025357312                                  | 0.988145463                    | 59.52104569                            |
| 0.131574279                            | -414.5415724                           | 0.022021656                                  | 0.984105474                    | 91.88549422                            |
| 0.368466507                            | 21.83381648                            | 0.03277668                                   | 0.987607179                    | 48.92153193                            |
| 0.36937096                             | 284.8513942                            | 0.051965816                                  | 0.982563971                    | 64.75264521                            |
| 0.348617531                            | 151.3437575                            | 0.022678017                                  | 0.992518776                    | 62.68585195                            |
| 0.369404813                            | 146.566446                             | 0.027923728                                  | 0.993047858                    | 63.32691224                            |
| 0.346233192                            | -5.559503562                           | 0.019497579                                  | 0.989967979                    | 65.80141778                            |
| 0.34188478                             | -320.8483191                           | 0.025532451                                  | 0.99095328                     | 65.0332494                             |
| 0.392559598                            | 3.68290522                             | 0.029176042                                  | 0.986087343                    | 41.04549652                            |
| 0.352644372                            | -40.36678855                           | 0.023885959                                  | 0.990751171                    | 64.45791143                            |
| 0.458781791                            | 184.1922134                            | 0.062845944                                  | 0.991687934                    | 53.79269513                            |
| 0.357173219                            | -119.1617953                           | 0.035985715                                  | 0.988058683                    | 67.98514754                            |
| 0.326478835                            | -72.64086397                           | 0.02819463                                   | 0.986927343                    | 65.74813022                            |
| 0.318109707                            | -103.2490908                           | 0.021713986                                  | 0.987292764                    | 72.24834281                            |
| 0.342320019                            | -370.3206678                           | 0.02376567                                   | 0.985322283                    | 52.66560236                            |
| 0.428309265                            | 262.7401698                            | 0.061317901                                  | 0.983732175                    | 45.59663531                            |
| 0.427088849                            | 76.58010764                            | 0.04540304                                   | 0.982278322                    | 32.46614923                            |
| 0.338386614                            | 79.6704792                             | 0.021865743                                  | 0.989967546                    | 73.98461596                            |
| 0.4568689                              | 84.99999804                            | 0.057866107                                  | 0.991520314                    | 37.96200981                            |
| 0.378953257                            | 24.3679259                             | 0.024366546                                  | 0.983826813                    | 39.9865879                             |
| 0.402145227                            | 133.5582668                            | 0.050869244                                  | 0.986642837                    | 50.16569878                            |
| 0.395086396                            | 123.4342325                            | 0.031931967                                  | 0.990240064                    | 43.88923933                            |
| 0.318799811                            | -32.96672097                           | 0.023232873                                  | 0.984939354                    | 49.33448209                            |
| 0.316780728                            | -291.5049821                           | 0.022796832                                  | 0.990260915                    | 77.87929653                            |
| 0.327778922                            | -546.8982502                           | 0.023843769                                  | 0.990803739                    | 91.53273832                            |
| 0.37297616                             | 35.42352932                            | 0.034243401                                  | 0.98935824                     | 50.03372121                            |
| 0.413997298                            | 152.9875706                            | 0.0558144                                    | 0.980207145                    | 39.89206279                            |
| 0.430706024                            | 39.92860947                            | 0.042642072                                  | 0.991346702                    | 36.4544587                             |
| 0.370925774                            | 9.741569071                            | 0.026969519                                  | 0.991121573                    | 57.8702014                             |
| 0.432461355                            | -343.2355042                           | 0.058168174                                  | 0.990029759                    | 35.38829604                            |
| 0.317918567                            | -318.9654565                           | 0.018476041                                  | 0.989287045                    | 90.09078215                            |
| 0.32203179                             | -320.0240885                           | 0.02114149                                   | 0.988400912                    | 74.77472742                            |
| 0.343730131                            | -101.1947736                           | 0.019057668                                  | 0.988475                       | 57.43959511                            |
| 0.382385678                            | -109.4991862                           | 0.037821665                                  | 0.990982397                    | 47.02036363                            |
| 0.414760386                            | -369.1435354                           | 0.056265868                                  | 0.993155422                    | 56.99810248                            |
| 0.369588774                            | -188.7760401                           | 0.054558271                                  | 0.992469129                    | 101.5873919                            |
| 0.458780888                            | -21.70935084                           | 0.044826795                                  | 0.983166581                    | 15.5006629                             |
| 0.312517119                            | 23.13419779                            | 0.013515302                                  | 0.987556419                    | 93.14269271                            |
| 0.377360207                            | -466.7024667                           | 0.040651763                                  | 0.989708857                    | 54.98901831                            |
| 0.285846721                            | 387.9533941                            | 0.016429742                                  | 0.989984225                    | 92.83094464                            |
| 0.308677105                            | -6.905221083                           | 0.016076057                                  | 0.985903526                    | 65.54771315                            |
| 0.340594224                            | -115.3604323                           | 0.028116538                                  | 0.991445009                    | 51.05440782                            |
| 0.389710874                            | 271.7881184                            | 0.034690152                                  | 0.988570096                    | 51.41530822                            |
| 0.339415726                            | -258.3372497                           | 0.021217088                                  | 0.988532435                    | 66.10104773                            |
| 0.367037385                            | 71.21780729                            | 0.027393849                                  | 0.990754678                    | 50.94044868                            |
| 0.45254182                             | 106.5989846                            | 0.04932725                                   | 0.983440015                    | 32.38082364                            |
| 0.365843079                            | 189.1778768                            | 0.028097977                                  | 0.9873107                      | 59.46327543                            |
| 0.423679866                            | 185.1176015                            | 0.052567719                                  | 0.988744588                    | 42.46678628                            |
| 0.326435245                            | -117.1125398                           | 0.017548486                                  | 0.986407325                    | 67.91765531                            |
| 0.293314205                            | 78.15203059                            | 0.017435138                                  | 0.987728642                    | 72.15170229                            |
| 0.379584123                            | 90.74095102                            | 0.027792526                                  | 0.989946757                    | 51.73196887                            |
| 0.329122815                            | 88.40174017                            | 0.023712363                                  | 0.981770386                    | 47.34113721                            |
| 0.348982427                            | 125.5697043                            | 0.023793245                                  | 0.982228881                    | 63.01833509                            |
| 0.375743297                            | -21.59535214                           | 0.035333141                                  | 0.992780278                    | 43.37480238                            |
| 0.314813021                            | -141.9961654                           | 0.016512768                                  | 0.9871185                      | 69.16693773                            |
| 0.371212471                            | -477.2231843                           | 0.03438932                                   | 0.990090435                    | 63.28900762                            |
| 0.382454657                            | -36.96013252                           | 0.037970892                                  | 0.987017148                    | 32.45578032                            |
| 0.371772809                            | 34.99068742                            | 0.031997249                                  | 0.991932996                    | 64.7963355                             |
| 0.413188063                            | 356.3252596                            | 0.056363458                                  | 0.991673584                    | 53.50110147                            |
| 0.355988178                            | -35.30169005                           | 0.027186897                                  | 0.990227322                    | 60.63327349                            |
| 0.340054556                            | -108.3580136                           | 0.023297832                                  | 0.992053135                    | 71.44759483                            |
| 0.368244883                            | 344.6218326                            | 0.026848484                                  | 0.992535551                    | 67.19717751                            |
| 0.371782296                            | 67.43055352                            | 0.028684858                                  | 0.986729718                    | 36.46661506                            |
| 0.407310157                            | 15.18288692                            | 0.047365462                                  | 0.9932137                      | 60.41232954                            |
| 0.492636696                            | 0.785185661                            | 0.079559612                                  | 0.990183087                    | 23.48921289                            |
| 0.352974357                            | -3.146639539                           | 0.032174644                                  | 0.99247686                     | 73.19656618                            |
| 0.369261467                            | -194.5049242                           | 0.024652546                                  | 0.99285014                     | 56.15765569                            |
| 0.438518951                            | 34.04066044                            | 0.040142864                                  | 0.990059009                    | 34.51326251                            |
| 0.366447894                            | -334.7959089                           | 0.034190229                                  | 0.988467176                    | 54.9281567                             |
| 0.37261532                             | 125.7445555                            | 0.030894058                                  | 0.991238854                    | 70.30410025                            |
| 0.360076603                            | -359.4628483                           | 0.027749701                                  | 0.99037702                     | 57.58001234                            |
| 0.298085202                            | -286.3620557                           | 0.018977746                                  | 0.982972233                    | 70.47938991                            |
| 0.32126242                             | 231.6655804                            | 0.02191299                                   | 0.987727716                    | 86.14349177                            |
| 0.388052602                            | -279.7467958                           | 0.048582484                                  | 0.987312421                    | 47.73531692                            |
| 0.436072042                            | 21.51961475                            | 0.036171328                                  | 0.989388231                    | 30.79200332                            |
| 0.426294706                            | 356.9745478                            | 0.050158945                                  | 0.990871281                    | 56.23448293                            |
| 0.399091316                            | 55.54596728                            | 0.036110846                                  | 0.9886676                      | 40.62297158                            |
| 0.297184762                            | -1280.240413                           | 0.018887008                                  | 0.98732653                     | 117.9504708                            |
| 0.288592761                            | -873.3267609                           | 0.021564453                                  | 0.984884446                    | 116.3914795                            |
| 0.400273257                            | -152.2039725                           | 0.041418531                                  | 0.992094596                    | 42.49651368                            |
| 0.357505293                            | -20.72636165                           | 0.026637131                                  | 0.990907134                    | 59.46823612                            |
| 0.398294033                            | -251.7947295                           | 0.03084269                                   | 0.991581206                    | 49.09123636                            |
| 0.317736287                            | -164.9719501                           | 0.019816629                                  | 0.990103862                    | 86.50245474                            |
| 0.476201777                            | 163.4587477                            | 0.055659076                                  | 0.991431358                    | 39.2461041                             |
| 0.33039562                             | -554.6974844                           | 0.027699383                                  | 0.985513972                    | 79.50638717                            |
| 0.364480295                            | 55.25121274                            | 0.032551518                                  | 0.990400321                    | 56.18503697                            |
| 0.386035693                            | 41.86909454                            | 0.035780186                                  | 0.988173614                    | 47.80868219                            |
| 0.399700561                            | -64.33155199                           | 0.033681104                                  | 0.990426846                    | 52.74389801                            |
| 0.484436356                            | 230.5909814                            | 0.096530841                                  | 0.984545432                    | 47.99695001                            |
| 0.319673871                            | 92.40381357                            | 0.018025703                                  | 0.984450575                    | 79.95757049                            |
| 0.353897813                            | -278.007796                            | 0.024335921                                  | 0.990964694                    | 58.87925727                            |
| 0.35445114                             | -80.20281673                           | 0.031974917                                  | 0.98895094                     | 49.90396212                            |
| 0.355031883                            | -75.81115228                           | 0.020990222                                  | 0.989941527                    | 50.68199055                            |
| 0.372366728                            | -200.2160454                           | 0.033935548                                  | 0.991843311                    | 87.9570257                             |
| 0.369825961                            | -2.070241692                           | 0.025860559                                  | 0.989002837                    | 74.00166428                            |
| 0.435068725                            | -944.6609886                           | 0.055629809                                  | 0.988525258                    | 65.44822685                            |
| 0.461603475                            | -29.38338332                           | 0.043113951                                  | 0.98649372                     | 26.76930538                            |
| 0.376565807                            | 145.2619805                            | 0.033150514                                  | 0.986975925                    | 49.99383216                            |

| log.sigma.4.0.mm.3D_glc_m_Contrast | log.sigma.4.0.mm.3D_glc_m_DifferenceEntropy | log.sigma.4.0.mm.3D_glc_m_InverseVariance | log.sigma.4.0.mm.3D_glc_m_Entropy | log.sigma.4.0.mm.3D_glc_m_Dissimilarity |
|------------------------------------|---------------------------------------------|-------------------------------------------|-----------------------------------|-----------------------------------------|
| 22.28131823                        | 3.305452499                                 | 0.280596016                               | 8.22738741                        | 3.471176767                             |
| 6.149720468                        | 2.447082402                                 | 0.414112112                               | 6.401661414                       | 1.791842295                             |
| 8.445152447                        | 2.66620082                                  | 0.3750013                                 | 7.277413983                       | 2.126601535                             |
| 15.34386364                        | 3.042971604                                 | 0.319939668                               | 7.723067607                       | 2.880157839                             |
| 9.612793038                        | 2.750456076                                 | 0.362842453                               | 7.260966128                       | 2.259872297                             |
| 10.83135761                        | 2.787405389                                 | 0.346374381                               | 7.00665131                        | 2.388895811                             |
| 10.57966216                        | 2.830659601                                 | 0.340686041                               | 7.570912332                       | 2.420225486                             |
| 9.862444167                        | 2.769826611                                 | 0.366623865                               | 7.408438849                       | 2.277565703                             |
| 12.14314497                        | 2.896290948                                 | 0.339418471                               | 7.677945311                       | 2.539393619                             |
| 11.57232369                        | 2.861876788                                 | 0.336221117                               | 7.31580457                        | 2.506904352                             |
| 7.101678655                        | 2.562015044                                 | 0.384403174                               | 6.942821119                       | 2.001984647                             |
| 9.820737973                        | 2.792603909                                 | 0.351442139                               | 7.465490408                       | 2.353892841                             |
| 7.392452358                        | 2.528538612                                 | 0.403138527                               | 6.64882149                        | 1.827138529                             |
| 13.03966502                        | 2.929001741                                 | 0.346923326                               | 7.427823891                       | 2.556900044                             |
| 14.13773544                        | 3.00630006                                  | 0.321895832                               | 7.6004368                         | 2.767053935                             |
| 12.82545618                        | 2.919290269                                 | 0.317128768                               | 7.741009003                       | 2.704022747                             |
| 11.40234154                        | 2.850965665                                 | 0.339381928                               | 7.216621108                       | 2.497841887                             |
| 7.935381481                        | 2.574715229                                 | 0.398118415                               | 6.646726454                       | 1.946969765                             |
| 5.4727028                          | 2.393175423                                 | 0.408226212                               | 6.473055043                       | 1.755663399                             |
| 10.6804152                         | 2.844892465                                 | 0.339073808                               | 7.72901617                        | 2.469675449                             |
| 5.533284055                        | 2.408779656                                 | 0.414274031                               | 6.635114601                       | 1.677892202                             |
| 6.884828101                        | 2.535332214                                 | 0.379447528                               | 6.870104622                       | 2.010674641                             |
| 6.82719512                         | 2.545279639                                 | 0.386640513                               | 6.87699625                        | 1.946517068                             |
| 8.601873653                        | 2.684362685                                 | 0.377000394                               | 7.095804216                       | 2.116628902                             |
| 14.54539473                        | 2.984466992                                 | 0.316492679                               | 7.391368621                       | 2.801291881                             |
| 14.69548128                        | 3.027779084                                 | 0.319886866                               | 7.746812613                       | 2.820873532                             |
| 15.43320194                        | 3.035540287                                 | 0.329512543                               | 7.84647937                        | 2.812144711                             |
| 9.374960053                        | 2.755449746                                 | 0.363075036                               | 7.2332827                         | 2.251856769                             |
| 6.131283952                        | 2.45724929                                  | 0.395225589                               | 6.354808325                       | 1.864064268                             |
| 6.102274114                        | 2.470740246                                 | 0.406035081                               | 6.71393329                        | 1.796321771                             |
| 10.72020764                        | 2.816788319                                 | 0.35939173                                | 7.45072125                        | 2.352083993                             |
| 8.972625743                        | 2.636944227                                 | 0.396476939                               | 6.500234995                       | 2.010037042                             |
| 14.50605                           | 3.024014246                                 | 0.317998964                               | 7.955169602                       | 2.817488085                             |
| 14.05428336                        | 3.004136935                                 | 0.314392681                               | 7.708268626                       | 2.786184264                             |
| 10.16098854                        | 2.808389249                                 | 0.342763244                               | 7.489791513                       | 2.405498611                             |
| 9.094370737                        | 2.701508837                                 | 0.36905016                                | 7.095336224                       | 2.178668602                             |
| 11.04026884                        | 2.723808196                                 | 0.387965926                               | 6.979483863                       | 2.180375084                             |
| 13.81426038                        | 2.973201449                                 | 0.315484774                               | 7.82715454                        | 2.600765318                             |
| 4.014744072                        | 2.217606245                                 | 0.532305283                               | 5.897368414                       | 1.522066884                             |
| 13.38417285                        | 2.989223603                                 | 0.316326759                               | 8.099108465                       | 2.75764734                              |
| 12.59919508                        | 2.880877027                                 | 0.362208211                               | 7.207665232                       | 2.45424023                              |
| 16.68230785                        | 3.119475925                                 | 0.29143921                                | 8.114947664                       | 3.085514863                             |
| 14.35455457                        | 3.000392164                                 | 0.314444643                               | 7.792886027                       | 2.836820927                             |
| 12.18818101                        | 2.912534218                                 | 0.338665699                               | 7.409417139                       | 2.558870482                             |
| 7.522730123                        | 2.600703236                                 | 0.380532119                               | 6.919642537                       | 2.039185327                             |
| 13.14427153                        | 2.943588558                                 | 0.340297008                               | 7.623952704                       | 2.634442059                             |
| 9.886520251                        | 2.780144586                                 | 0.357199087                               | 7.340630924                       | 2.305525644                             |
| 4.521970785                        | 2.256212041                                 | 0.436608817                               | 6.267323397                       | 1.589022669                             |
| 8.311773333                        | 2.665446541                                 | 0.359124757                               | 7.186994069                       | 2.185078794                             |
| 6.839823607                        | 2.510612303                                 | 0.39597956                                | 6.643999284                       | 1.889465538                             |
| 12.08563598                        | 2.920883477                                 | 0.321255884                               | 7.676125813                       | 2.614326652                             |
| 15.76519248                        | 3.094881774                                 | 0.300344079                               | 7.95555219                        | 3.000770767                             |
| 8.21924925                         | 2.675684284                                 | 0.371577977                               | 7.268786733                       | 2.132521456                             |
| 12.31385098                        | 2.885544448                                 | 0.334769672                               | 7.285831626                       | 2.614523419                             |
| 11.03404287                        | 2.841848482                                 | 0.343158991                               | 7.390973809                       | 2.457299255                             |
| 8.650569174                        | 2.682567119                                 | 0.369871496                               | 7.027571777                       | 2.166667706                             |
| 12.97784674                        | 2.966023607                                 | 0.313234502                               | 7.81428064                        | 2.735860494                             |
| 10.74363507                        | 2.786069812                                 | 0.369727178                               | 7.300321987                       | 2.321103092                             |
| 9.401712018                        | 2.72948917                                  | 0.3707392                                 | 6.906322963                       | 2.1984675                               |
| 11.46273647                        | 2.88817669                                  | 0.340292067                               | 7.647765353                       | 2.43259002                              |
| 9.010455839                        | 2.668096288                                 | 0.386930983                               | 6.954533328                       | 2.069548999                             |
| 9.756365961                        | 2.786299941                                 | 0.350183111                               | 7.410837586                       | 2.342151538                             |
| 12.53416843                        | 2.940126889                                 | 0.334489583                               | 7.737721721                       | 2.59080837                              |
| 10.02218211                        | 2.773536919                                 | 0.363199697                               | 7.458985372                       | 2.304264169                             |
| 8.0815159                          | 2.596904722                                 | 0.362896775                               | 7.96608447                        | 2.138695311                             |
| 9.159569166                        | 2.702214976                                 | 0.37397774                                | 7.158483679                       | 2.109291068                             |
| 5.097997333                        | 2.306990198                                 | 0.43778953                                | 6.111189994                       | 1.531565616                             |
| 12.50289502                        | 2.922008106                                 | 0.343501172                               | 7.70367861                        | 2.534979182                             |
| 10.13491033                        | 2.793264979                                 | 0.361051441                               | 7.415071555                       | 2.311038959                             |
| 6.02983272                         | 2.457236974                                 | 0.408753053                               | 6.681711514                       | 1.766711602                             |
| 11.04708723                        | 2.801009748                                 | 0.35149291                                | 7.12212781                        | 2.374986273                             |
| 10.62589217                        | 2.802029055                                 | 0.36308952                                | 7.519526068                       | 2.322005606                             |
| 11.00899806                        | 2.823353678                                 | 0.353719343                               | 7.278098499                       | 2.39297239                              |
| 16.40592553                        | 3.106568639                                 | 0.304423837                               | 7.856542738                       | 3.023806566                             |
| 13.24360366                        | 2.965547116                                 | 0.323567494                               | 7.894357671                       | 2.714067594                             |
| 9.861054262                        | 2.745812623                                 | 0.362562853                               | 6.993481636                       | 2.230761597                             |
| 6.504059503                        | 2.482947367                                 | 0.407962362                               | 6.65106367                        | 1.806610501                             |
| 6.415977965                        | 2.498672663                                 | 0.395542285                               | 6.76027899                        | 1.85144767                              |
| 8.663742902                        | 2.551196413                                 | 0.388525807                               | 6.893317419                       | 1.950437482                             |
| 18.34792932                        | 3.162323654                                 | 0.296495712                               | 8.02654277                        | 3.135618689                             |
| 22.0825741                         | 3.292593809                                 | 0.287027457                               | 8.183506207                       | 3.420756894                             |
| 9.545957896                        | 2.727457097                                 | 0.38149079                                | 6.905235468                       | 2.166224789                             |
| 11.0092423                         | 2.808124529                                 | 0.348925605                               | 7.415771168                       | 2.402653261                             |
| 6.844193501                        | 2.535545409                                 | 0.391109816                               | 7.021819343                       | 1.950558246                             |
| 13.35659435                        | 2.969788977                                 | 0.314531726                               | 7.878964152                       | 2.735393818                             |
| 4.324224753                        | 2.256895454                                 | 0.433242383                               | 6.292559744                       | 1.510220009                             |
| 15.84459731                        | 3.058598674                                 | 0.330431458                               | 7.748602944                       | 2.857228459                             |
| 10.95178742                        | 2.843368334                                 | 0.35444818                                | 7.391529402                       | 2.393047401                             |
| 7.746751969                        | 2.63095342                                  | 0.366371385                               | 7.031459872                       | 2.083305157                             |
| 8.475585544                        | 2.657253387                                 | 0.382102738                               | 7.120981273                       | 2.080667797                             |
| 6.083624664                        | 2.394575165                                 | 0.412708545                               | 6.07851803                        | 1.669962504                             |
| 12.93113791                        | 2.968755668                                 | 0.319159726                               | 7.83355768                        | 2.710237184                             |
| 11.54953182                        | 2.878850416                                 | 0.347004695                               | 7.497614017                       | 2.470853867                             |
| 11.13656098                        | 2.856836357                                 | 0.345592034                               | 7.362779724                       | 2.450267598                             |
| 9.428954486                        | 2.756802688                                 | 0.355334939                               | 7.382865111                       | 2.306616462                             |
| 13.03005284                        | 2.915722867                                 | 0.351851479                               | 7.621710617                       | 2.495360608                             |
| 8.360025487                        | 2.684347714                                 | 0.364482546                               | 7.500694698                       | 2.18091422                              |
| 10.39169657                        | 2.698693691                                 | 0.389405819                               | 7.48557992                        | 2.123638553                             |
| 4.623688102                        | 2.290496704                                 | 0.434341472                               | 6.269668477                       | 1.581851613                             |
| 10.1733926                         | 2.775888401                                 | 0.365543582                               | 7.30042746                        | 2.279677898                             |



| log.sigma.4.0.mm.3D_glcm_DifferenceVariance | log.sigma.4.0.mm.3D_glcm_ldn | log.sigma.4.0.mm.3D_glcm_ldm | log.sigma.4.0.mm.3D_glcm_Correlation | log.sigma.4.0.mm.3D_glcm_Autocorrelation |
|---------------------------------------------|------------------------------|------------------------------|--------------------------------------|------------------------------------------|
| 9.827218132                                 | 0.919454374                  | 0.282134236                  | 0.664371031                          | 532.1333203                              |
| 2.801903251                                 | 0.915548153                  | 0.433403858                  | 0.687974727                          | 74.37811324                              |
| 3.766940633                                 | 0.928588498                  | 0.387290081                  | 0.750851395                          | 189.1860374                              |
| 6.777041386                                 | 0.917783775                  | 0.313574279                  | 0.715006382                          | 297.3120453                              |
| 4.375469777                                 | 0.927140968                  | 0.368466507                  | 0.670859807                          | 244.8353612                              |
| 4.702747111                                 | 0.915531052                  | 0.36937096                   | 0.7115079                            | 136.4083772                              |
| 4.531332137                                 | 0.941261974                  | 0.348617531                  | 0.712090318                          | 255.5295942                              |
| 4.562687634                                 | 0.944638888                  | 0.369404813                  | 0.729390959                          | 478.2883126                              |
| 5.394338212                                 | 0.934139973                  | 0.346233192                  | 0.689786409                          | 407.0714677                              |
| 5.079954681                                 | 0.936379555                  | 0.34188478                   | 0.697021121                          | 596.8398769                              |
| 2.918739913                                 | 0.921153448                  | 0.392559598                  | 0.703584714                          | 145.613087                               |
| 4.175572125                                 | 0.934637779                  | 0.352644372                  | 0.735663334                          | 307.3879965                              |
| 3.925944927                                 | 0.944306033                  | 0.458781791                  | 0.757491419                          | 271.4352507                              |
| 6.289899519                                 | 0.930522686                  | 0.357173219                  | 0.677682312                          | 369.1910414                              |
| 6.232699237                                 | 0.924938479                  | 0.326478835                  | 0.647249965                          | 299.3913325                              |
| 5.021437051                                 | 0.92390878                   | 0.318109707                  | 0.700828443                          | 286.2008842                              |
| 4.909356995                                 | 0.920261624                  | 0.342320019                  | 0.64260614                           | 308.815551                               |
| 3.964911149                                 | 0.921390913                  | 0.428309265                  | 0.696438304                          | 104.2417689                              |
| 2.224942705                                 | 0.912086363                  | 0.427088849                  | 0.711386955                          | 78.81001677                              |
| 4.411105309                                 | 0.931694011                  | 0.338386614                  | 0.747648265                          | 241.3633642                              |
| 2.64009459                                  | 0.940385361                  | 0.4568689                    | 0.741944281                          | 150.9266235                              |
| 2.711613248                                 | 0.913572217                  | 0.378953257                  | 0.70447842                           | 109.4565704                              |
| 2.926995381                                 | 0.923201197                  | 0.402145227                  | 0.757117301                          | 135.5954143                              |
| 3.990263533                                 | 0.935607209                  | 0.395086396                  | 0.671720213                          | 210.2820995                              |
| 6.254438156                                 | 0.91972455                   | 0.318799811                  | 0.54484101                           | 366.7755952                              |
| 6.465741998                                 | 0.934354391                  | 0.316780728                  | 0.678600258                          | 470.3119138                              |
| 7.248472877                                 | 0.937796565                  | 0.327778922                  | 0.712311312                          | 559.375887                               |
| 4.17149528                                  | 0.931711737                  | 0.37297616                   | 0.684159006                          | 286.2369313                              |
| 2.484479091                                 | 0.907434582                  | 0.413997298                  | 0.734619246                          | 88.77657167                              |
| 2.766148684                                 | 0.938577014                  | 0.430706024                  | 0.713372159                          | 239.4155873                              |
| 4.979692366                                 | 0.938657611                  | 0.370925774                  | 0.68783868                           | 435.6994033                              |
| 4.781499112                                 | 0.939399345                  | 0.432461355                  | 0.597184296                          | 366.5675939                              |
| 6.297010789                                 | 0.931155038                  | 0.317918567                  | 0.722883609                          | 378.3188343                              |
| 5.954166476                                 | 0.928234345                  | 0.32203179                   | 0.683744887                          | 411.6915313                              |
| 4.210454408                                 | 0.927194909                  | 0.343730131                  | 0.699085459                          | 346.8821274                              |
| 4.179294236                                 | 0.937686618                  | 0.382385678                  | 0.675473543                          | 397.2894067                              |
| 6.035266479                                 | 0.950128978                  | 0.414760386                  | 0.676004282                          | 567.1123653                              |
| 6.661408556                                 | 0.944747582                  | 0.369588774                  | 0.761735114                          | 541.1674232                              |
| 1.624659609                                 | 0.913167805                  | 0.458780888                  | 0.588134244                          | 85.25113977                              |
| 5.566880502                                 | 0.924732383                  | 0.312517119                  | 0.748043846                          | 252.5796958                              |
| 6.366316                                    | 0.936812496                  | 0.377360207                  | 0.627435113                          | 420.9040812                              |
| 6.80095855                                  | 0.931713961                  | 0.285846721                  | 0.697412921                          | 339.0960446                              |
| 5.853224615                                 | 0.920787006                  | 0.308677105                  | 0.644663597                          | 341.7844606                              |
| 5.461226659                                 | 0.938419451                  | 0.340594224                  | 0.614794631                          | 276.6968042                              |
| 3.256443759                                 | 0.928490087                  | 0.389710874                  | 0.743332842                          | 142.8021094                              |
| 5.953591642                                 | 0.930204993                  | 0.339415726                  | 0.669019902                          | 352.0184674                              |
| 4.41138847                                  | 0.936127174                  | 0.367037385                  | 0.674139768                          | 319.0321795                              |
| 1.869112216                                 | 0.915070653                  | 0.45254182                   | 0.754067211                          | 67.63692662                              |
| 3.399135494                                 | 0.923723816                  | 0.365843079                  | 0.75425076                           | 173.2116205                              |
| 3.038662637                                 | 0.931144927                  | 0.423679866                  | 0.716681658                          | 99.32547895                              |
| 5.068274785                                 | 0.921737083                  | 0.326435245                  | 0.696119249                          | 290.8535877                              |
| 6.512312361                                 | 0.925029289                  | 0.293314205                  | 0.643580985                          | 308.6908529                              |
| 3.556135006                                 | 0.932711746                  | 0.379584123                  | 0.724200941                          | 226.8419638                              |
| 5.129256654                                 | 0.911201121                  | 0.329122815                  | 0.587572199                          | 179.1581228                              |
| 4.775383287                                 | 0.912991003                  | 0.348982427                  | 0.700973794                          | 144.2423899                              |
| 3.826753896                                 | 0.942716951                  | 0.375743297                  | 0.665667287                          | 431.6091555                              |
| 5.222230098                                 | 0.92303648                   | 0.314813021                  | 0.684520638                          | 325.8741877                              |
| 5.147655654                                 | 0.936163776                  | 0.371212471                  | 0.71061535                           | 430.3216169                              |
| 4.458326878                                 | 0.926766435                  | 0.382454657                  | 0.549483911                          | 251.8548507                              |
| 5.362616929                                 | 0.941405875                  | 0.371772809                  | 0.69973511                           | 452.9619768                              |
| 4.605957302                                 | 0.942666345                  | 0.413188063                  | 0.709417161                          | 201.8162034                              |
| 4.133115254                                 | 0.933089243                  | 0.355988178                  | 0.723246676                          | 295.2067852                              |
| 5.656455441                                 | 0.940625129                  | 0.340054556                  | 0.701512331                          | 546.362365                               |
| 4.510032372                                 | 0.942631666                  | 0.368244883                  | 0.738658741                          | 391.0052696                              |
| 3.318015672                                 | 0.92250919                   | 0.371782296                  | 0.634023486                          | 171.1708102                              |
| 4.563165641                                 | 0.947435168                  | 0.407310157                  | 0.737937967                          | 469.4184412                              |
| 2.675738503                                 | 0.938998015                  | 0.492636696                  | 0.6425938                            | 179.577878                               |
| 5.893558738                                 | 0.94330102                   | 0.352974357                  | 0.707828277                          | 447.5540886                              |
| 4.640166355                                 | 0.943907543                  | 0.369261467                  | 0.693431109                          | 468.4905042                              |
| 2.797979442                                 | 0.935144432                  | 0.438518951                  | 0.700264585                          | 202.7858683                              |
| 5.101924527                                 | 0.930923015                  | 0.366447894                  | 0.669033752                          | 357.9712697                              |
| 5.092110169                                 | 0.939433761                  | 0.37261532                   | 0.737054433                          | 425.5136919                              |
| 5.093417444                                 | 0.935956658                  | 0.360076603                  | 0.677831946                          | 503.9608154                              |
| 6.961229361                                 | 0.91395827                   | 0.298085202                  | 0.623450783                          | 307.687187                               |
| 5.612225899                                 | 0.925943792                  | 0.32126242                   | 0.733621954                          | 243.0275912                              |
| 4.678670334                                 | 0.928429884                  | 0.388052602                  | 0.658702235                          | 303.2949677                              |
| 3.124146692                                 | 0.934041363                  | 0.436072042                  | 0.644253738                          | 158.4920984                              |
| 2.87440876                                  | 0.936866212                  | 0.426294706                  | 0.793955276                          | 155.1478007                              |
| 2.965634012                                 | 0.928703049                  | 0.399091316                  | 0.71003645                           | 177.84581                                |
| 8.125084481                                 | 0.926315265                  | 0.297184762                  | 0.731526965                          | 543.1167737                              |
| 9.960561722                                 | 0.920657442                  | 0.288592761                  | 0.682932583                          | 531.5346982                              |
| 4.729940214                                 | 0.943274537                  | 0.400273257                  | 0.631269984                          | 263.198187                               |
| 4.970756914                                 | 0.937357311                  | 0.357505293                  | 0.688365413                          | 393.8853487                              |
| 2.882414465                                 | 0.937819042                  | 0.398294033                  | 0.755259747                          | 279.1427606                              |
| 5.602317585                                 | 0.932757691                  | 0.317736287                  | 0.731375545                          | 337.9046158                              |
| 1.985796269                                 | 0.938955928                  | 0.476201777                  | 0.797904497                          | 147.1179385                              |
| 7.387219687                                 | 0.923275986                  | 0.33039562                   | 0.667250738                          | 371.7982644                              |
| 5.088028169                                 | 0.935942439                  | 0.364480295                  | 0.673698172                          | 346.8198045                              |
| 3.271665208                                 | 0.9270606                    | 0.386035693                  | 0.720203121                          | 184.7789966                              |
| 4.009939934                                 | 0.936682365                  | 0.399700561                  | 0.722362556                          | 266.1643698                              |
| 3.029825761                                 | 0.925461653                  | 0.484436356                  | 0.771900799                          | 91.7619918                               |
| 5.390798029                                 | 0.9196731298                 | 0.319673871                  | 0.721062343                          | 220.0896737                              |
| 5.271426718                                 | 0.937385265                  | 0.353897813                  | 0.671570259                          | 475.6772276                              |
| 4.923162359                                 | 0.930660954                  | 0.35445114                   | 0.634620494                          | 352.9786244                              |
| 3.956925631                                 | 0.93199861                   | 0.355031883                  | 0.685714944                          | 252.7929496                              |
| 6.596290675                                 | 0.943205482                  | 0.372366728                  | 0.741544355                          | 593.4121158                              |
| 3.463113152                                 | 0.928917032                  | 0.369825961                  | 0.796659183                          | 190.6359878                              |
| 5.598340243                                 | 0.936731444                  | 0.435068725                  | 0.729164685                          | 416.2889231                              |
| 2.018204358                                 | 0.92391146                   | 0.461603475                  | 0.703760591                          | 121.9600005                              |
| 4.794205908                                 | 0.926920444                  | 0.376565807                  | 0.660814713                          | 225.2539784                              |

| log.sigma.4.0.mm.3D_glcm_SumEntropy | log.sigma.4.0.mm.3D_glcm_AverageIntensity | log.sigma.4.0.mm.3D_glcm_Energy | log.sigma.4.0.mm.3D_glcm_SumSquares | log.sigma.4.0.mm.3D_glcm_ClusterProminence |
|-------------------------------------|-------------------------------------------|---------------------------------|-------------------------------------|--------------------------------------------|
| 5.346010729                         | 22.71512494                               | 0.005436015                     | 31.8788152                          | 42511.24156                                |
| 4.392835309                         | 8.21488735                                | 0.020385133                     | 9.964348599                         | 3212.637003                                |
| 4.937316804                         | 13.28442525                               | 0.009073507                     | 17.05811183                         | 9358.485834                                |
| 5.168449784                         | 16.7574952                                | 0.006977437                     | 27.44041403                         | 25053.89161                                |
| 4.805311166                         | 15.34549284                               | 0.010193909                     | 14.80113187                         | 7432.006828                                |
| 4.786200334                         | 11.08654163                               | 0.013298193                     | 18.89600071                         | 10197.60075                                |
| 4.99894093                          | 15.64658857                               | 0.007940804                     | 18.60982608                         | 13495.12482                                |
| 4.935613988                         | 21.62115015                               | 0.010175471                     | 17.9165723                          | 15783.61232                                |
| 5.033193057                         | 19.93127206                               | 0.007328395                     | 19.35805597                         | 14167.63498                                |
| 4.90840418                          | 24.19039283                               | 0.008692985                     | 18.79546759                         | 19444.97757                                |
| 4.681341761                         | 11.70969265                               | 0.011475193                     | 12.03679379                         | 4983.343073                                |
| 5.00220913                          | 17.20586456                               | 0.00847771                      | 18.93370289                         | 12995.9661                                 |
| 4.664321637                         | 16.15394233                               | 0.02131146                      | 15.68276664                         | 12789.26255                                |
| 4.952643129                         | 18.92926415                               | 0.01005727                      | 20.33028784                         | 19925.16321                                |
| 4.963171186                         | 16.99661724                               | 0.008967837                     | 20.32379719                         | 17688.03071                                |
| 5.088567783                         | 16.54528817                               | 0.00709678                      | 21.77287542                         | 15722.94638                                |
| 4.747738559                         | 17.29463801                               | 0.009841856                     | 16.17361118                         | 11851.36239                                |
| 4.52699254                          | 9.73728067                                | 0.017941128                     | 13.3830042                          | 6222.434305                                |
| 4.435645866                         | 8.488452471                               | 0.015968299                     | 9.484713008                         | 2564.548606                                |
| 5.120615073                         | 15.06512152                               | 0.007120011                     | 21.60627912                         | 15938.31012                                |
| 4.580022871                         | 11.95051164                               | 0.017677765                     | 10.87382347                         | 4620.407506                                |
| 4.641105022                         | 10.0585484                                | 0.011040947                     | 11.717854                           | 4065.368128                                |
| 4.731839042                         | 11.1684473                                | 0.013962883                     | 14.24822347                         | 7293.560852                                |
| 4.714003864                         | 14.20528997                               | 0.011573953                     | 13.27379542                         | 6867.37513                                 |
| 4.799357341                         | 19.02158021                               | 0.008764419                     | 16.30478416                         | 8519.51016                                 |
| 5.084689746                         | 21.40704444                               | 0.007620531                     | 22.64096841                         | 27942.20072                                |
| 5.181907944                         | 23.33467943                               | 0.007870998                     | 26.65520136                         | 40921.0966                                 |
| 4.789521595                         | 16.64915948                               | 0.011005253                     | 15.15793268                         | 8608.552097                                |
| 4.425111225                         | 8.962554408                               | 0.018372607                     | 11.50583668                         | 3806.379774                                |
| 4.578371968                         | 15.22914423                               | 0.015566101                     | 10.68805325                         | 4682.172428                                |
| 4.909730773                         | 20.66555099                               | 0.009420406                     | 16.92869714                         | 12083.79594                                |
| 4.322658349                         | 19.00709836                               | 0.021385659                     | 11.23694781                         | 9664.427006                                |
| 5.226353257                         | 19.05302887                               | 0.006360861                     | 25.94830063                         | 26727.8874                                 |
| 5.062440605                         | 19.99187088                               | 0.007561741                     | 22.03635887                         | 21761.60084                                |
| 4.920943286                         | 18.36073453                               | 0.007911213                     | 17.2608502                          | 11237.05191                                |
| 4.741830547                         | 19.77985323                               | 0.01147012                      | 14.18224461                         | 9155.648149                                |
| 4.709234007                         | 23.62164439                               | 0.017146329                     | 16.84008029                         | 23422.08906                                |
| 5.300912716                         | 22.88386083                               | 0.0093174                       | 28.633481                           | 34109.60164                                |
| 3.98032631                          | 9.076133217                               | 0.0225044                       | 4.878851744                         | 764.028851                                 |
| 5.302072999                         | 15.31158781                               | 0.005239049                     | 27.10815628                         | 24866.24138                                |
| 4.738398694                         | 20.35187519                               | 0.013457627                     | 16.60621156                         | 17634.542                                  |
| 5.255032509                         | 18.03873951                               | 0.005346556                     | 27.45763718                         | 33614.04127                                |
| 5.037146945                         | 18.25420569                               | 0.006557898                     | 20.32569968                         | 13422.00666                                |
| 4.802445832                         | 16.44871673                               | 0.009446633                     | 16.02186066                         | 10988.46114                                |
| 4.712147736                         | 11.48042368                               | 0.013040128                     | 14.73450959                         | 7920.22909                                 |
| 4.990687895                         | 18.51758258                               | 0.007853605                     | 20.01907003                         | 19413.36128                                |
| 4.837685963                         | 17.63539745                               | 0.010063777                     | 15.49824791                         | 9318.048218                                |
| 4.377055036                         | 7.78851488                                | 0.019069711                     | 9.225698606                         | 2646.642991                                |
| 4.882943691                         | 12.66494356                               | 0.009573862                     | 16.94376219                         | 10537.47542                                |
| 4.591299176                         | 9.508592576                               | 0.015971546                     | 12.32665247                         | 5831.354161                                |
| 5.04884722                          | 16.67934081                               | 0.006959874                     | 20.37973615                         | 14552.36351                                |
| 5.101553378                         | 17.29502123                               | 0.00578866                      | 22.28782408                         | 15908.77281                                |
| 4.849681248                         | 14.71262483                               | 0.010324637                     | 15.22744901                         | 8565.787058                                |
| 4.754156952                         | 13.05356429                               | 0.008944349                     | 14.91374705                         | 6080.334904                                |
| 4.933941494                         | 11.4546608                                | 0.00832218                      | 18.51309449                         | 9211.815146                                |
| 4.686242707                         | 20.62868457                               | 0.012156258                     | 12.77467352                         | 7285.458207                                |
| 5.073922987                         | 17.7333832                                | 0.006385145                     | 20.86935371                         | 15012.77449                                |
| 4.861466154                         | 20.51511386                               | 0.011345821                     | 18.36592241                         | 22701.28772                                |
| 4.504027493                         | 15.69235125                               | 0.01330989                      | 10.51985454                         | 3992.741861                                |
| 5.015115561                         | 21.04246314                               | 0.008382825                     | 18.62863791                         | 14730.57088                                |
| 4.712373175                         | 13.84644068                               | 0.015611128                     | 16.03542513                         | 10723.75426                                |
| 4.935521442                         | 16.8815447                                | 0.008739587                     | 18.0653845                          | 10519.47386                                |
| 5.068163171                         | 23.10876833                               | 0.007600745                     | 20.89244323                         | 21440.79109                                |
| 4.953840556                         | 19.48132464                               | 0.009755942                     | 19.14211891                         | 17060.43497                                |
| 4.557695466                         | 12.80759133                               | 0.011995874                     | 11.13703274                         | 4006.834326                                |
| 4.856704319                         | 21.41244488                               | 0.014065954                     | 17.0780169                          | 17317.20756                                |
| 4.213636367                         | 13.2273914                                | 0.026253569                     | 7.146802555                         | 2672.411208                                |
| 5.07061276                          | 20.87846299                               | 0.008974276                     | 21.13532091                         | 22161.32351                                |
| 4.896952422                         | 21.44745896                               | 0.009380509                     | 16.08443379                         | 13264.27211                                |
| 4.538407126                         | 13.98768189                               | 0.014794754                     | 10.13577381                         | 3507.469122                                |
| 4.756712394                         | 18.72120042                               | 0.011220482                     | 16.85927937                         | 15950.71025                                |
| 5.034366181                         | 20.31517425                               | 0.009437674                     | 20.1338681                          | 17404.52643                                |
| 4.833176542                         | 22.25962213                               | 0.010218169                     | 16.74689338                         | 17548.26293                                |
| 5.048005059                         | 17.22751007                               | 0.006564742                     | 22.15233384                         | 16874.47508                                |
| 5.208944053                         | 15.05320768                               | 0.006360452                     | 25.39564989                         | 22734.94321                                |
| 4.694561707                         | 17.15249217                               | 0.01336429                      | 14.51315488                         | 9883.125394                                |
| 4.477523677                         | 12.34530787                               | 0.015135793                     | 9.324015705                         | 3168.386244                                |
| 4.728995284                         | 11.94900209                               | 0.016363714                     | 15.75180474                         | 11699.27098                                |
| 4.653429081                         | 13.0150421                                | 0.0127225                       | 11.87167862                         | 4905.848078                                |
| 5.288738839                         | 22.85397717                               | 0.006353179                     | 33.35515615                         | 57525.13421                                |
| 5.362102374                         | 22.66284837                               | 0.005685233                     | 33.52111758                         | 51791.17919                                |
| 4.591101317                         | 16.01437601                               | 0.01526422                      | 13.27527649                         | 10603.21286                                |
| 4.910965245                         | 19.62372363                               | 0.009814589                     | 17.55852192                         | 14576.95206                                |
| 4.763836434                         | 16.39962569                               | 0.012149141                     | 14.11172263                         | 10513.46752                                |
| 5.204609698                         | 17.96787575                               | 0.006557012                     | 24.9901506                          | 26928.88518                                |
| 4.46558964                          | 11.76352966                               | 0.021311326                     | 10.89258221                         | 4511.29615                                 |
| 5.054367017                         | 18.97345334                               | 0.00837328                      | 23.95086391                         | 25541.48083                                |
| 4.890043076                         | 18.41863811                               | 0.0090820                       | 16.96341934                         | 10090.56515                                |
| 4.760542587                         | 13.21904096                               | 0.011781933                     | 13.88885854                         | 6919.420243                                |
| 4.829854403                         | 15.99284017                               | 0.011982355                     | 15.53309271                         | 10330.28715                                |
| 4.36938593                          | 9.014742521                               | 0.029431969                     | 13.52014367                         | 4987.199422                                |
| 5.165146455                         | 14.28946788                               | 0.006283176                     | 23.65273184                         | 18155.14717                                |
| 4.914968008                         | 21.61689981                               | 0.009176012                     | 17.14842912                         | 15917.38666                                |
| 4.813508737                         | 18.62394104                               | 0.009949136                     | 15.57781526                         | 9371.906021                                |
| 4.855150659                         | 15.59794249                               | 0.008713292                     | 15.28452803                         | 8086.782208                                |
| 5.111374317                         | 24.04015754                               | 0.009615217                     | 25.16020909                         | 33483.88469                                |
| 5.089938889                         | 13.20710937                               | 0.008438884                     | 20.73077177                         | 16760.27575                                |
| 4.612740765                         | 20.12127841                               | 0.017741997                     | 19.06877415                         | 30047.11836                                |
| 4.359099535                         | 10.78985025                               | 0.018517253                     | 7.848248371                         | 2339.210139                                |
| 4.798297597                         | 14.68544284                               | 0.010061944                     | 15.18975456                         | 6958.145266                                |

| log.sigma.4.0.mm.3D_glc_m_SumAverage | log.sigma.4.0.mm.3D_glc_m_Irc2 | log.sigma.4.0.mm.3D_glc_m_Irc1 | log.sigma.4.0.mm.3D_glc_m_DifferenceAverage | log.sigma.4.0.mm.3D_glc_m_Id |
|--------------------------------------|--------------------------------|--------------------------------|---------------------------------------------|------------------------------|
| 45.18127129                          | 0.871396236                    | -0.164623095                   | 3.471176767                                 | 0.36581598                   |
| 16.4297747                           | 0.860199751                    | -0.201016863                   | 1.791842295                                 | 0.494766352                  |
| 26.56126372                          | 0.891800501                    | -0.206890498                   | 2.126601535                                 | 0.457613043                  |
| 33.35427084                          | 0.908462624                    | -0.207025155                   | 2.880157839                                 | 0.394465496                  |
| 30.65973943                          | 0.841694302                    | -0.16349872                    | 2.259872297                                 | 0.442402855                  |
| 22.17308325                          | 0.909141459                    | -0.232318931                   | 2.388895811                                 | 0.442253847                  |
| 31.14404674                          | 0.841866029                    | -0.159903187                   | 2.420225486                                 | 0.426406607                  |
| 43.12344261                          | 0.859072694                    | -0.172024479                   | 2.27565703                                  | 0.442441424                  |
| 39.68062179                          | 0.834181425                    | -0.157295802                   | 2.539393619                                 | 0.423026071                  |
| 48.30925726                          | 0.890352442                    | -0.199786187                   | 2.506904352                                 | 0.420424075                  |
| 23.4193853                           | 0.85143666                     | -0.182806372                   | 2.001984647                                 | 0.462689193                  |
| 34.27525915                          | 0.87463583                     | -0.181832101                   | 2.353892841                                 | 0.42935698                   |
| 32.23823942                          | 0.907305808                    | -0.240677057                   | 1.827138529                                 | 0.514821902                  |
| 37.70585673                          | 0.876883626                    | -0.186506143                   | 2.556900044                                 | 0.430649081                  |
| 33.85132374                          | 0.843374053                    | -0.158651543                   | 2.767053935                                 | 0.405791619                  |
| 32.94442798                          | 0.84918394                     | -0.163277654                   | 2.704022747                                 | 0.400507934                  |
| 34.55380839                          | 0.833346752                    | -0.159799067                   | 2.497841887                                 | 0.420565869                  |
| 19.47445613                          | 0.873548904                    | -0.206302455                   | 1.946969765                                 | 0.490050703                  |
| 16.97690494                          | 0.842648918                    | -0.186799943                   | 1.755663399                                 | 0.491085837                  |
| 30.0350867                           | 0.862893575                    | -0.170791849                   | 2.469675449                                 | 0.417673484                  |
| 23.90102327                          | 0.869276318                    | -0.203238124                   | 1.677892202                                 | 0.514690884                  |
| 20.11709681                          | 0.856589012                    | -0.184231481                   | 2.010674641                                 | 0.452755169                  |
| 22.3368946                           | 0.8969679                      | -0.220746341                   | 1.946517068                                 | 0.470848086                  |
| 28.38671222                          | 0.831281441                    | -0.161958763                   | 2.116628902                                 | 0.463578922                  |
| 37.84427106                          | 0.821126159                    | -0.153944116                   | 2.801291881                                 | 0.400045463                  |
| 42.63639218                          | 0.856668159                    | -0.166785415                   | 2.820873532                                 | 0.397844629                  |
| 46.49033932                          | 0.873344949                    | -0.175689156                   | 2.812144711                                 | 0.405966143                  |
| 33.23036899                          | 0.832324879                    | -0.158188209                   | 2.251856769                                 | 0.445607235                  |
| 17.92510882                          | 0.894111055                    | -0.229655308                   | 1.864064268                                 | 0.480276853                  |
| 30.45158967                          | 0.852746027                    | -0.185988332                   | 1.796321771                                 | 0.493463025                  |
| 41.1776722                           | 0.834710317                    | -0.159508166                   | 2.352083993                                 | 0.4430451                    |
| 37.94528982                          | 0.785094289                    | -0.145988414                   | 2.010037042                                 | 0.492563285                  |
| 37.91582581                          | 0.865735692                    | -0.169582007                   | 2.817488085                                 | 0.398867408                  |
| 39.82412119                          | 0.85856053                     | -0.167378185                   | 2.786184264                                 | 0.402590656                  |
| 36.6085642                           | 0.827455354                    | -0.151353087                   | 2.405498611                                 | 0.42253081                   |
| 39.3850671                           | 0.840409908                    | -0.168756377                   | 2.178668602                                 | 0.453781527                  |
| 47.14300122                          | 0.857403714                    | -0.185782048                   | 2.180375084                                 | 0.477505619                  |
| 45.57210505                          | 0.915287828                    | -0.218741309                   | 2.600765318                                 | 0.442614304                  |
| 18.15226643                          | 0.73527616                     | -0.133589731                   | 1.522066884                                 | 0.517234078                  |
| 30.50496186                          | 0.856058689                    | -0.160319927                   | 2.75764734                                  | 0.395521702                  |
| 40.51176818                          | 0.82088999                     | -0.15157739                    | 2.45424023                                  | 0.446524295                  |
| 35.77985886                          | 0.842190785                    | -0.151221178                   | 3.085514863                                 | 0.372424845                  |
| 36.27566243                          | 0.8091771                      | -0.139378529                   | 2.836820927                                 | 0.391621408                  |
| 32.67896369                          | 0.795182553                    | -0.13477686                    | 2.558870482                                 | 0.418389568                  |
| 22.96084736                          | 0.875863517                    | -0.198186271                   | 2.039185327                                 | 0.4603346                    |
| 36.81142386                          | 0.845108704                    | -0.160002405                   | 2.634442059                                 | 0.416261746                  |
| 35.14291677                          | 0.818319538                    | -0.150489308                   | 2.305525644                                 | 0.440820138                  |
| 15.57702976                          | 0.871814769                    | -0.218889917                   | 1.589022669                                 | 0.510737181                  |
| 25.32988713                          | 0.907946191                    | -0.222196514                   | 2.185078794                                 | 0.441628091                  |
| 19.01718515                          | 0.876925641                    | -0.215546395                   | 1.889465538                                 | 0.487362087                  |
| 33.2777863                           | 0.84682438                     | -0.159907702                   | 2.614326652                                 | 0.408013308                  |
| 34.32670795                          | 0.807118133                    | -0.130975796                   | 3.000770767                                 | 0.378501153                  |
| 29.38873054                          | 0.842173592                    | -0.165874602                   | 2.132521456                                 | 0.45187524                   |
| 26.10712859                          | 0.832834335                    | -0.157055882                   | 2.614523419                                 | 0.408829799                  |
| 22.9093216                           | 0.876053527                    | -0.187804284                   | 2.457299925                                 | 0.425817987                  |
| 41.13004141                          | 0.839212308                    | -0.168388458                   | 2.166667706                                 | 0.448677919                  |
| 35.31653554                          | 0.820178178                    | -0.143080426                   | 2.735860494                                 | 0.39770519                   |
| 40.84971461                          | 0.850696825                    | -0.171646886                   | 2.321103092                                 | 0.443142736                  |
| 31.37442667                          | 0.779846531                    | -0.133492766                   | 2.1984675                                   | 0.453449982                  |
| 41.93419711                          | 0.834883575                    | -0.154156633                   | 2.43259002                                  | 0.444021794                  |
| 27.61794762                          | 0.878352219                    | -0.199829267                   | 2.069548999                                 | 0.477651636                  |
| 33.61355568                          | 0.860954157                    | -0.174187063                   | 2.342151538                                 | 0.432216508                  |
| 46.11404098                          | 0.838142873                    | -0.152772217                   | 2.59080837                                  | 0.417882986                  |
| 38.81759249                          | 0.847797111                    | -0.170405981                   | 2.304264169                                 | 0.44133528                   |
| 25.61518266                          | 0.852290617                    | -0.186773506                   | 2.138695311                                 | 0.446746219                  |
| 42.73627178                          | 0.876095162                    | -0.193434187                   | 2.109291068                                 | 0.473705629                  |
| 26.45478279                          | 0.835886776                    | -0.188903283                   | 1.531565616                                 | 0.542337436                  |
| 41.58676487                          | 0.847020247                    | -0.160521165                   | 2.534979182                                 | 0.428057759                  |
| 42.75375173                          | 0.827707392                    | -0.153194745                   | 2.311038959                                 | 0.442209655                  |
| 27.97536378                          | 0.840132988                    | -0.179371062                   | 1.766711602                                 | 0.499708461                  |
| 37.25452459                          | 0.868806898                    | -0.187909518                   | 2.374986273                                 | 0.440257234                  |
| 40.52547086                          | 0.875770315                    | -0.184477922                   | 2.322005606                                 | 0.444688456                  |
| 44.37618974                          | 0.847689933                    | -0.168278929                   | 2.39297239                                  | 0.43478774                   |
| 34.30208243                          | 0.807420419                    | -0.133699118                   | 3.023806566                                 | 0.381625461                  |
| 29.98582025                          | 0.870764915                    | -0.174849216                   | 2.714067594                                 | 0.402283061                  |
| 34.28139381                          | 0.850304327                    | -0.178234785                   | 2.230761597                                 | 0.45798966                   |
| 24.69061574                          | 0.822024035                    | -0.169434579                   | 1.806610501                                 | 0.497348048                  |
| 23.88943488                          | 0.921631513                    | -0.253168337                   | 1.85144767                                  | 0.489986125                  |
| 26.03008421                          | 0.85477439                     | -0.180957134                   | 1.950437482                                 | 0.468347148                  |
| 45.52637468                          | 0.8844224                      | -0.181471358                   | 3.135618689                                 | 0.380629535                  |
| 45.07564748                          | 0.886422793                    | -0.177467518                   | 3.420756894                                 | 0.370886702                  |
| 31.9347686                           | 0.828528746                    | -0.161042796                   | 2.166224789                                 | 0.466486225                  |
| 39.07720116                          | 0.852839304                    | -0.172772265                   | 2.402653261                                 | 0.433118079                  |
| 32.77510217                          | 0.857227328                    | -0.186006445                   | 1.950558246                                 | 0.467496152                  |
| 35.75378923                          | 0.878931842                    | -0.181884753                   | 2.735393818                                 | 0.400186851                  |
| 23.52705933                          | 0.901287758                    | -0.243481056                   | 1.510220009                                 | 0.530563921                  |
| 37.72914938                          | 0.843996401                    | -0.158747685                   | 2.857228459                                 | 0.407012066                  |
| 36.63239636                          | 0.847480539                    | -0.164317659                   | 2.393047401                                 | 0.437830241                  |
| 26.43808192                          | 0.875568582                    | -0.1948423                     | 2.083305157                                 | 0.458048391                  |
| 31.94202344                          | 0.878532235                    | -0.197870535                   | 2.080667797                                 | 0.467367334                  |
| 18.02948504                          | 0.905811363                    | -0.26170874                    | 1.669962504                                 | 0.535826751                  |
| 28.51714256                          | 0.869805803                    | -0.171692983                   | 2.710237184                                 | 0.401389975                  |
| 43.07394097                          | 0.816059492                    | -0.145491433                   | 2.470853867                                 | 0.429212173                  |
| 37.05555778                          | 0.801383677                    | -0.141025743                   | 2.450267598                                 | 0.429902861                  |
| 31.14341181                          | 0.815766429                    | -0.147565761                   | 2.306616462                                 | 0.43170354                   |
| 47.9437721                           | 0.896160922                    | -0.200290668                   | 2.495360668                                 | 0.443094935                  |
| 26.39848354                          | 0.89899199                     | -0.206780881                   | 2.18091422                                  | 0.444134964                  |
| 40.12491425                          | 0.898851387                    | -0.226731848                   | 2.123638553                                 | 0.493383297                  |
| 21.57970051                          | 0.8580504                      | -0.204852456                   | 1.581851613                                 | 0.517904123                  |
| 29.34573843                          | 0.808135979                    | -0.147073051                   | 2.279677898                                 | 0.448081249                  |

| log.sigma.4.0.mm.3D_glcm_ClusterTendency | log.sigma.4.0.mm.3D_firstorder_InterquartileRange | log.sigma.4.0.mm.3D_firstorder_Skewness | log.sigma.4.0.mm.3D_firstorder_Uniformity |
|------------------------------------------|---------------------------------------------------|-----------------------------------------|-------------------------------------------|
| 109.4351351                              | 158.2417586                                       | -0.659853532                            | 0.056351441                               |
| 33.70767393                              | 93.69926453                                       | 0.599047114                             | 0.104425062                               |
| 59.52104569                              | 145.5308285                                       | 0.102816069                             | 0.067532284                               |
| 91.88549422                              | 150.1585808                                       | -0.431987083                            | 0.060837334                               |
| 48.92153193                              | 116.7189212                                       | 0.020953828                             | 0.078528037                               |
| 64.75264521                              | 156.1236472                                       | 0.567223415                             | 0.077956841                               |
| 62.68585195                              | 143.0435591                                       | 0.329404952                             | 0.067665324                               |
| 63.32691224                              | 127.6200609                                       | 0.113070057                             | 0.074191895                               |
| 65.80141778                              | 147.6906176                                       | -0.04642437                             | 0.064721015                               |
| 65.0332494                               | 144.2588263                                       | -0.630755068                            | 0.069412731                               |
| 41.04549652                              | 121.4469779                                       | 0.061250244                             | 0.080923844                               |
| 64.45791143                              | 143.8411636                                       | -0.023099204                            | 0.068896533                               |
| 53.79269513                              | 84.09231949                                       | 0.348613206                             | 0.102355374                               |
| 67.98514754                              | 126.8170757                                       | -0.320752657                            | 0.072708456                               |
| 65.74813022                              | 117.9763746                                       | -0.147744069                            | 0.073349396                               |
| 72.24834281                              | 158.5847378                                       | -0.103671982                            | 0.061532449                               |
| 52.66560236                              | 121.4415307                                       | -1.00431658                             | 0.082423564                               |
| 45.59663531                              | 101.2644615                                       | 0.832563122                             | 0.09791362                                |
| 32.46614923                              | 107.68366                                         | 0.426949565                             | 0.097720566                               |
| 73.98461596                              | 150.7153873                                       | 0.149879219                             | 0.062413537                               |
| 37.96200981                              | 103.7186699                                       | 0.337320129                             | 0.093372727                               |
| 39.9865879                               | 124.2780371                                       | 0.113369731                             | 0.081071703                               |
| 50.16569878                              | 115.6674509                                       | 0.354539679                             | 0.083070755                               |
| 43.88923933                              | 112.6856709                                       | 0.353452201                             | 0.082065233                               |
| 49.33448209                              | 130.0146484                                       | -0.283014543                            | 0.07243252                                |
| 77.87929653                              | 130.5396156                                       | -0.482360496                            | 0.066334697                               |
| 91.53273832                              | 124.7742615                                       | -0.619185766                            | 0.068104604                               |
| 50.03372121                              | 112.6674824                                       | 0.018807079                             | 0.08098687                                |
| 39.89206279                              | 122.4130507                                       | 0.612583099                             | 0.096587336                               |
| 36.4544587                               | 90.94446373                                       | 0.056843471                             | 0.095940284                               |
| 57.8702014                               | 135.0244884                                       | -0.05373328                             | 0.071911098                               |
| 35.38829604                              | 73.51083469                                       | -1.549218661                            | 0.120044777                               |
| 90.09078215                              | 155.7641392                                       | -0.356236621                            | 0.058376871                               |
| 74.77472742                              | 139.8249631                                       | -0.522490231                            | 0.064539611                               |
| 57.43959511                              | 139.042201                                        | -0.187208351                            | 0.069950136                               |
| 47.02036363                              | 130.3819485                                       | -0.326638339                            | 0.078885359                               |
| 56.99810248                              | 89.57393646                                       | -0.894978622                            | 0.097331682                               |
| 101.5873919                              | 169.6426249                                       | -0.16165593                             | 0.059801161                               |
| 15.5006629                               | 76.58013535                                       | -0.326388846                            | 0.127391103                               |
| 93.14269271                              | 170.0343881                                       | 0.065557307                             | 0.054530291                               |
| 54.98901831                              | 94.51958323                                       | -1.093460665                            | 0.090320525                               |
| 92.83094464                              | 160.625926                                        | 0.329333904                             | 0.057879832                               |
| 65.54771315                              | 146.747364                                        | -0.040988472                            | 0.063419444                               |
| 51.05440782                              | 116.134738                                        | -0.23156762                             | 0.075738787                               |
| 51.41530822                              | 125.4310369                                       | 0.631219918                             | 0.082258811                               |
| 66.10104773                              | 140.4261475                                       | -0.326162934                            | 0.066447424                               |
| 50.94044868                              | 122.1071711                                       | 0.173419434                             | 0.076752545                               |
| 32.38082364                              | 106.300211                                        | 0.55421095                              | 0.099181299                               |
| 59.46327543                              | 134.3938317                                       | 0.257410447                             | 0.070564664                               |
| 42.46678628                              | 127.8071938                                       | 0.662843897                             | 0.087069124                               |
| 67.91765531                              | 148.0716248                                       | -0.257750591                            | 0.064333087                               |
| 72.15170229                              | 155.3704                                          | 0.159844794                             | 0.060447439                               |
| 51.73196887                              | 113.0185103                                       | 0.160820068                             | 0.078186204                               |
| 47.34113721                              | 142.2181263                                       | 0.192310296                             | 0.072511355                               |
| 63.01833509                              | 166.1862402                                       | 0.260137154                             | 0.065924586                               |
| 43.37480238                              | 102.4829998                                       | -0.244729773                            | 0.084789481                               |
| 69.16693373                              | 154.2755756                                       | -0.218587946                            | 0.061484016                               |
| 63.28900762                              | 111.7466393                                       | -0.949843996                            | 0.077913563                               |
| 32.45578032                              | 96.58105314                                       | -0.402871019                            | 0.092814032                               |
| 64.7963355                               | 138.0841079                                       | 0.018344416                             | 0.069259409                               |
| 53.50110147                              | 111.791883                                        | 0.85612867                              | 0.087407287                               |
| 60.63327349                              | 148.8683023                                       | -0.000375222                            | 0.06947804                                |
| 71.44759483                              | 139.2033157                                       | -0.178031242                            | 0.067737936                               |
| 67.19717751                              | 133.4686112                                       | 0.523537477                             | 0.071272205                               |
| 36.46661506                              | 122.9602203                                       | 0.217514768                             | 0.081954815                               |
| 60.41232954                              | 117.2900681                                       | -0.05996085                             | 0.083627913                               |
| 23.48921289                              | 70.74671674                                       | -0.172205825                            | 0.125585739                               |
| 73.19656618                              | 122.8771768                                       | -0.073489207                            | 0.071054592                               |
| 56.15765569                              | 126.8711319                                       | -0.53050848                             | 0.071112555                               |
| 34.51326251                              | 112.4455557                                       | 0.074331833                             | 0.090006387                               |
| 54.9281567                               | 122.2662907                                       | -0.659699429                            | 0.07969712                                |
| 70.30410025                              | 143.1327171                                       | 0.076122505                             | 0.068190892                               |
| 57.58001234                              | 117.6443386                                       | -0.902075204                            | 0.077262858                               |
| 70.47938991                              | 146.7547321                                       | -0.474345188                            | 0.063998004                               |
| 86.14349177                              | 154.2906828                                       | 0.364696673                             | 0.060225778                               |
| 47.73531692                              | 99.07986403                                       | -0.954584063                            | 0.090862449                               |
| 30.79200332                              | 101.6773224                                       | -0.007945778                            | 0.091802629                               |
| 56.23448293                              | 124.0072489                                       | 0.778604812                             | 0.088061855                               |
| 40.62297158                              | 114.5916862                                       | 0.183357864                             | 0.085294399                               |
| 117.9504708                              | 151.3108482                                       | -1.00766472                             | 0.06148855                                |
| 116.3914795                              | 158.2554216                                       | -0.797665054                            | 0.056379721                               |
| 42.49651368                              | 88.85510635                                       | -0.357468769                            | 0.09531977                                |
| 59.46823612                              | 123.4493484                                       | -0.101748086                            | 0.071604076                               |
| 49.09123636                              | 106.0711975                                       | -0.670221329                            | 0.085302439                               |
| 86.50245474                              | 149.4565787                                       | -0.187693989                            | 0.059545069                               |
| 39.2461041                               | 100.132153                                        | 0.583020272                             | 0.10172968                                |
| 79.50638717                              | 130.2706566                                       | -0.743535931                            | 0.068050227                               |
| 56.18503697                              | 144.9101858                                       | 0.085125345                             | 0.071194978                               |
| 47.80868219                              | 118.9774857                                       | 0.080839779                             | 0.0807308                                 |
| 52.74389801                              | 114.1175461                                       | -0.25218278                             | 0.079308154                               |
| 47.99695001                              | 149.2501011                                       | 0.723053265                             | 0.109170932                               |
| 79.95757049                              | 154.4522262                                       | 0.146137852                             | 0.060958166                               |
| 58.87925727                              | 115.9613953                                       | -0.708352137                            | 0.075720805                               |
| 49.90396212                              | 117.2462072                                       | -0.201952902                            | 0.077604775                               |
| 50.68199055                              | 123.715481                                        | -0.265933074                            | 0.074799957                               |
| 87.9570257                               | 140.0560155                                       | -0.344183217                            | 0.068183456                               |
| 74.00166428                              | 141.1880141                                       | -0.015014502                            | 0.065135873                               |
| 65.44822685                              | 86.76497984                                       | -1.684995738                            | 0.09792202                                |
| 26.76930538                              | 87.31970358                                       | -0.305990326                            | 0.106004405                               |
| 49.99383216                              | 139.1370821                                       | 0.323348951                             | 0.074282803                               |

| log.sigma.4.0.mm.3D_firstorder_MeanAbsoluteDeviation | log.sigma.4.0.mm.3D_firstorder_Energy | log.sigma.4.0.mm.3D_firstorder_RobustMeanAbsoluteDeviation | log.sigma.4.0.mm.3D_firstorder_Median |
|------------------------------------------------------|---------------------------------------|------------------------------------------------------------|---------------------------------------|
| 106.1164174                                          | 48569498.86                           | 68.05180777                                                | 66.693367                             |
| 62.53183316                                          | 13821609.06                           | 42.05476947                                                | 74.2872467                            |
| 84.71253375                                          | 38318460.66                           | 60.99871065                                                | 114.5536308                           |
| 99.62333371                                          | 18805230.97                           | 66.24951763                                                | 60.10847092                           |
| 73.70467078                                          | 32821809.65                           | 49.65436398                                                | 62.69450951                           |
| 90.73458246                                          | 13573299.07                           | 66.8249857                                                 | 59.98174477                           |
| 85.59591776                                          | 124208168.1                           | 59.64740736                                                | 92.19535828                           |
| 83.63191832                                          | 118557288                             | 54.62213464                                                | 92.41284561                           |
| 87.9451382                                           | 108906890.2                           | 60.77685786                                                | 102.9433441                           |
| 85.59435035                                          | 27796412.85                           | 60.58594472                                                | 118.8845749                           |
| 70.07447588                                          | 20479427.42                           | 49.63909323                                                | 72.94762802                           |
| 85.5300288                                           | 58207999.67                           | 59.35111336                                                | 106.501152                            |
| 68.27294414                                          | 24897470.24                           | 38.33658782                                                | 50.04101944                           |
| 85.97039424                                          | 34404817.05                           | 54.15504257                                                | 72.70811462                           |
| 82.58637183                                          | 37924432.8                            | 51.16205487                                                | 83.93916702                           |
| 94.34248485                                          | 101959982                             | 66.44733574                                                | 93.29624176                           |
| 75.72834452                                          | 17358396.87                           | 49.07881746                                                | 85.28951645                           |
| 70.90143501                                          | 17651110.69                           | 47.09870871                                                | 54.45637512                           |
| 62.51121547                                          | 14661087.16                           | 44.86545213                                                | 57.46900368                           |
| 92.06804041                                          | 137851049.5                           | 63.36341893                                                | 106.2615433                           |
| 65.82758392                                          | 44369483.53                           | 44.74125679                                                | 74.42020798                           |
| 70.27474821                                          | 16427693.09                           | 51.25832847                                                | 82.34785461                           |
| 74.65877517                                          | 17940251.95                           | 50.15187603                                                | 75.98729324                           |
| 70.60596499                                          | 42137016.36                           | 47.49811178                                                | 80.66429901                           |
| 79.73230916                                          | 27660044.83                           | 53.32784968                                                | 105.6236267                           |
| 90.12720631                                          | 61057151.58                           | 56.48763352                                                | 106.6999817                           |
| 91.28870285                                          | 79809006.9                            | 55.05649933                                                | 94.74626923                           |
| 73.52469886                                          | 41295721.11                           | 48.15953002                                                | 66.55028534                           |
| 69.26222344                                          | 6502002.361                           | 51.11590356                                                | 66.02072144                           |
| 61.01694969                                          | 31699658.95                           | 39.09962139                                                | 91.96313477                           |
| 81.9881729                                           | 102971025.3                           | 56.17899185                                                | 94.56645584                           |
| 56.05190238                                          | 16707561.17                           | 31.29362025                                                | 43.96787262                           |
| 100.1427638                                          | 66121162.13                           | 66.83086405                                                | 71.97377014                           |
| 92.73850356                                          | 51661236.61                           | 60.96267276                                                | 92.97687912                           |
| 81.66912497                                          | 108772262.7                           | 57.14032169                                                | 114.1975708                           |
| 75.40158428                                          | 60011570.17                           | 52.55539833                                                | 97.85362244                           |
| 69.4611868                                           | 49973571.18                           | 38.7002169                                                 | 48.17054749                           |
| 103.8558622                                          | 126227827.3                           | 70.18187552                                                | 72.6662674                            |
| 44.33193432                                          | 8664797.633                           | 31.45491063                                                | 64.80516052                           |
| 102.9992782                                          | 154860861.7                           | 71.43203102                                                | 66.95727921                           |
| 74.03961177                                          | 33007347.13                           | 42.54884868                                                | 58.84628868                           |
| 99.60232646                                          | 79035779.43                           | 66.46067278                                                | 57.26777649                           |
| 89.56219956                                          | 92022228.59                           | 61.56380139                                                | 107.6319733                           |
| 77.5428256                                           | 38023176.62                           | 50.75826016                                                | 74.04178619                           |
| 77.57532251                                          | 32724516.65                           | 53.48950451                                                | 106.623291                            |
| 87.13404003                                          | 74725075.53                           | 58.32899965                                                | 119.6176987                           |
| 76.7856617                                           | 91231026.15                           | 50.94759214                                                | 91.53916931                           |
| 62.53601602                                          | 11125223.02                           | 44.97980804                                                | 64.77310181                           |
| 82.12393988                                          | 15113336.96                           | 57.20534172                                                | 74.93086243                           |
| 73.00632531                                          | 24873454.19                           | 52.90536546                                                | 84.54655838                           |
| 89.33043019                                          | 73326143.36                           | 61.39380623                                                | 125.4899902                           |
| 93.44625999                                          | 73969492.2                            | 64.52000817                                                | 86.75111389                           |
| 74.04153066                                          | 69450585.2                            | 48.94641361                                                | 73.20948029                           |
| 80.07674803                                          | 30802985.05                           | 57.73936185                                                | 124.173275                            |
| 90.29856796                                          | 35236820.04                           | 67.8508247                                                 | 109.0267334                           |
| 69.47531442                                          | 29578976.45                           | 44.43562543                                                | 79.0812645                            |
| 91.96521916                                          | 95974887.14                           | 63.72366822                                                | 103.2328491                           |
| 79.66604901                                          | 60903751.74                           | 48.2106516                                                 | 79.68107605                           |
| 63.15129724                                          | 15948785.95                           | 40.76644688                                                | 52.3899765                            |
| 85.15932873                                          | 143746214.9                           | 58.0993931                                                 | 56.19917297                           |
| 76.25992011                                          | 29341460.05                           | 49.00377965                                                | 60.72860909                           |
| 84.93682785                                          | 59741491.62                           | 60.62205235                                                | 95.05817032                           |
| 87.09163362                                          | 150469908.7                           | 58.87596389                                                | 107.1974564                           |
| 87.34403053                                          | 145266615.4                           | 58.03188022                                                | 60.82342529                           |
| 70.47583476                                          | 15242821.07                           | 50.46727735                                                | 100.6992531                           |
| 78.27240566                                          | 65221474.23                           | 49.69009546                                                | 61.50121498                           |
| 48.48592871                                          | 8062298.467                           | 29.98085241                                                | 36.19703484                           |
| 85.43412425                                          | 106959407                             | 52.83518336                                                | 58.16459656                           |
| 82.75858662                                          | 116015231.6                           | 53.85515233                                                | 94.11963654                           |
| 64.89348874                                          | 40983510.42                           | 46.16886412                                                | 79.34410095                           |
| 77.42158385                                          | 21092476.37                           | 50.8277397                                                 | 72.66755676                           |
| 89.2382494                                           | 118622892.3                           | 60.18733645                                                | 108.665226                            |
| 78.14902007                                          | 46119205.89                           | 49.25687148                                                | 99.18209076                           |
| 92.19403275                                          | 34764254.04                           | 61.95035459                                                | 51.77412796                           |
| 96.89402834                                          | 60846178.69                           | 65.17033327                                                | 50.18737793                           |
| 68.26596267                                          | 17534094.05                           | 42.48558487                                                | 76.85171127                           |
| 62.36440469                                          | 36065305.32                           | 42.4902073                                                 | 89.4625493                            |
| 76.83874457                                          | 16470442.73                           | 50.59756989                                                | 62.85056114                           |
| 69.04214106                                          | 26635835.43                           | 47.57346509                                                | 79.74568176                           |
| 107.3954531                                          | 50954895.65                           | 67.20763247                                                | 64.43479156                           |
| 107.9939137                                          | 47443306.21                           | 68.2017742                                                 | 66.99060822                           |
| 66.84103923                                          | 18512258.61                           | 39.04910199                                                | 40.93896866                           |
| 81.81774128                                          | 68202325.97                           | 52.85841711                                                | 94.22792816                           |
| 69.50933231                                          | 422110308.56                          | 44.60413632                                                | 77.97807312                           |
| 96.94883228                                          | 55618752.05                           | 64.4394918                                                 | 85.89881134                           |
| 66.08963795                                          | 21077387.05                           | 44.81588122                                                | 62.45489311                           |
| 91.150006                                            | 38503468                              | 56.61826157                                                | 45.38856888                           |
| 84.62595731                                          | 70373492.32                           | 59.3062797                                                 | 106.7635765                           |
| 73.11922181                                          | 25955722.82                           | 50.01502661                                                | 86.82023239                           |
| 75.07274289                                          | 35070936.64                           | 48.39201983                                                | 81.28843689                           |
| 79.94809742                                          | 21824532.63                           | 61.47782905                                                | 49.70737457                           |
| 93.85549774                                          | 62857943.67                           | 64.78079664                                                | 107.2714272                           |
| 78.77682432                                          | 74917825.18                           | 49.81999077                                                | 63.29397964                           |
| 75.64943274                                          | 65224857.53                           | 49.86781635                                                | 95.3069725                            |
| 76.16239195                                          | 51803447.53                           | 52.29852919                                                | 56.58407402                           |
| 93.60922223                                          | 78565057.35                           | 61.385323                                                  | 73.54354095                           |
| 88.76989159                                          | 50102214.76                           | 59.36953555                                                | 70.03523254                           |
| 72.6177616                                           | 12248593.49                           | 39.07679752                                                | 32.86075974                           |
| 54.32709951                                          | 6816483.843                           | 36.78812018                                                | 59.77352142                           |
| 80.11423224                                          | 119210594.1                           | 57.45906389                                                | 90.98228836                           |

| log.sigma.4.0.mm.3D_firstorder_TotalEnergy | log.sigma.4.0.mm.3D_firstorder_Maximum | log.sigma.4.0.mm.3D_firstorder_RootMeanSquared | log.sigma.4.0.mm.3D_firstorder_90Percentile | log.sigma.4.0.mm.3D_firstorder_Minimum |
|--------------------------------------------|----------------------------------------|------------------------------------------------|---------------------------------------------|----------------------------------------|
| 1311376469                                 | 410.1985474                            | 151.2896163                                    | 224.221344                                  | -480.947876                            |
| 373183444.7                                | 333.8732605                            | 121.5831797                                    | 213.5257996                                 | -97.88179779                           |
| 1034598438                                 | 441.1864319                            | 158.0488526                                    | 255.8039642                                 | -181.3616028                           |
| 507741236.2                                | 384.617157                             | 138.7369217                                    | 210.0567871                                 | -332.2601929                           |
| 886188860.5                                | 372.8264771                            | 117.730886                                     | 196.201329                                  | -275.9184265                           |
| 366479074.9                                | 424.4033508                            | 143.407129                                     | 246.6844086                                 | -153.0299225                           |
| 3353620537                                 | 635.8903198                            | 148.2560499                                    | 243.4741058                                 | -272.0112305                           |
| 3201046777                                 | 475.122406                             | 152.3486759                                    | 257.8117493                                 | -402.9624939                           |
| 2940486034                                 | 458.3239746                            | 154.7793301                                    | 253.5675125                                 | -360.0286865                           |
| 750503146.9                                | 389.7858276                            | 161.026363                                     | 258.4187439                                 | -450.3471375                           |
| 552944540.4                                | 338.3232422                            | 116.5354974                                    | 195.2610535                                 | -180.5363464                           |
| 1571615991                                 | 478.8366089                            | 158.9116996                                    | 258.6727661                                 | -280.5814819                           |
| 672231696.6                                | 390.5040283                            | 115.4796482                                    | 187.4031708                                 | -308.360199                            |
| 928930060.3                                | 406.089447                             | 141.5547603                                    | 231.0381287                                 | -366.35672                             |
| 1023959686                                 | 456.9047852                            | 138.2575043                                    | 210.2331787                                 | -323.7289429                           |
| 2752919515                                 | 459.5160522                            | 152.6427629                                    | 251.5236053                                 | -281.4782104                           |
| 468676715.4                                | 316.1824951                            | 120.5737153                                    | 174.9471771                                 | -329.8569641                           |
| 476579988.7                                | 357.3186646                            | 119.6477348                                    | 224.0866547                                 | -136.1021423                           |
| 395849353.4                                | 297.5730591                            | 106.2785796                                    | 191.2196182                                 | -115.7214737                           |
| 3721978336                                 | 546.1828613                            | 162.8340144                                    | 270.6687988                                 | -226.6319275                           |
| 1197976055                                 | 418.2451477                            | 121.1298818                                    | 205.6300125                                 | -191.4495697                           |
| 443547713.3                                | 326.946106                             | 123.3893192                                    | 206.2401733                                 | -133.5727539                           |
| 484386802.7                                | 353.5113525                            | 132.3622956                                    | 237.6842743                                 | -158.4345856                           |
| 1137699442                                 | 451.6445007                            | 126.1696562                                    | 210.3268616                                 | -228.4324799                           |
| 746821210.5                                | 394.4172668                            | 147.4050078                                    | 232.8719116                                 | -337.9307556                           |
| 1648543093                                 | 520.0943604                            | 160.5409171                                    | 251.2822906                                 | -416.7640686                           |
| 2154843186                                 | 510.5341187                            | 157.1169721                                    | 246.2479065                                 | -452.1837769                           |
| 1114984470                                 | 378.1634521                            | 122.2758498                                    | 207.757753                                  | -316.6571655                           |
| 175554063.7                                | 289.0769653                            | 120.606246                                     | 215.491394                                  | -103.906882                            |
| 855890791.7                                | 373.0443726                            | 124.2301688                                    | 200.4425415                                 | -255.8841858                           |
| 2780217684                                 | 437.0366821                            | 147.1110515                                    | 243.4192505                                 | -381.9634399                           |
| 451104151.7                                | 298.1008911                            | 89.8620423                                     | 114.7329651                                 | -404.4260559                           |
| 1785271377                                 | 490.037262                             | 143.098874                                     | 218.1082672                                 | -380.659729                            |
| 1394853389                                 | 442.6176309                            | 148.2683545                                    | 231.5755844                                 | -378.7546692                           |
| 2936851093                                 | 396.437561                             | 157.1576139                                    | 256.6908508                                 | -320.3406677                           |
| 1620312395                                 | 377.0250549                            | 141.4585696                                    | 231.6301941                                 | -350.2435303                           |
| 1349286422                                 | 441.3812561                            | 115.8885043                                    | 165.1322632                                 | -515.8336182                           |
| 3408151338                                 | 557.5665283                            | 156.3905921                                    | 258.2715454                                 | -452.344696                            |
| 233949536.1                                | 217.8465118                            | 83.93182305                                    | 132.7953323                                 | -134.566864                            |
| 4181243267                                 | 499.0743103                            | 145.9498424                                    | 238.1368484                                 | -290.4708252                           |
| 891198372.6                                | 385.3691711                            | 112.8029155                                    | 150.0845108                                 | -311.0986328                           |
| 2133966045                                 | 604.8060303                            | 142.9633724                                    | 217.386145                                  | -373.3594971                           |
| 2484600172                                 | 437.6236267                            | 158.7163024                                    | 262.2507751                                 | -322.3312378                           |
| 1026625769                                 | 582.5211182                            | 123.6229237                                    | 188.7463043                                 | -308.8621826                           |
| 883561949.7                                | 472.3600159                            | 160.0188679                                    | 274.3193237                                 | -129.4632721                           |
| 2017577039                                 | 490.2358093                            | 164.9916657                                    | 258.8193848                                 | -312.9631042                           |
| 2463237706                                 | 459.1976318                            | 141.4144014                                    | 233.2635284                                 | -315.3553467                           |
| 300381021.6                                | 293.5083923                            | 113.0173931                                    | 197.8256839                                 | -76.95709991                           |
| 408060097.9                                | 386.1662598                            | 133.2647849                                    | 224.1982574                                 | -210.3020935                           |
| 671583263.1                                | 460.3225403                            | 135.6374774                                    | 225.0943863                                 | -116.2204285                           |
| 1979805871                                 | 439.0877073                            | 168.9457883                                    | 264.9385498                                 | -270.4767456                           |
| 1997176289                                 | 529.5490112                            | 148.1313369                                    | 248.2723083                                 | -304.7286682                           |
| 1875165800                                 | 423.6277161                            | 124.0661797                                    | 210.0783997                                 | -268.2043762                           |
| 831680596.5                                | 440.5223999                            | 167.0366863                                    | 270.2838684                                 | -153.4204865                           |
| 951394141.2                                | 437.0424805                            | 162.7693142                                    | 269.9616394                                 | -146.4749603                           |
| 798632364.2                                | 408.6347961                            | 123.1613002                                    | 201.7399063                                 | -418.0651855                           |
| 2591321953                                 | 431.4976501                            | 154.0350458                                    | 249.0946777                                 | -303.0556641                           |
| 1644401297                                 | 365.0538025                            | 130.21717967                                   | 200.1620117                                 | -410.6147766                           |
| 430617220.7                                | 314.4972534                            | 98.37510549                                    | 155.2745499                                 | -307.1989136                           |
| 3881147803                                 | 469.4796753                            | 125.4834947                                    | 201.8152405                                 | -425.9606323                           |
| 792219421.5                                | 527.5634155                            | 128.8978017                                    | 226.5980377                                 | -225.4554291                           |
| 1613020274                                 | 460.0970764                            | 149.5830555                                    | 251.2311157                                 | -288.070282                            |
| 4062687536                                 | 509.3615112                            | 161.2215358                                    | 262.5464417                                 | -449.315033                            |
| 3922198615                                 | 490.7695618                            | 138.0447673                                    | 245.3158508                                 | -396.9794006                           |
| 411556169                                  | 375.7944336                            | 138.9054002                                    | 215.8953369                                 | -183.0977478                           |
| 1760979804                                 | 427.7581482                            | 129.9538561                                    | 217.8955627                                 | -413.9265442                           |
| 217682058.6                                | 272.9922605                            | 78.6304281                                     | 126.4797432                                 | -266.480896                            |
| 2887903990                                 | 541.133606                             | 130.8185963                                    | 206.875148                                  | -449.9157104                           |
| 3132411254                                 | 475.4516907                            | 140.7407606                                    | 219.4359467                                 | -403.2250671                           |
| 1106554781                                 | 326.6097107                            | 118.9201332                                    | 197.5945084                                 | -248.7792511                           |
| 569496862.1                                | 369.6006165                            | 127.4263403                                    | 199.4043701                                 | -352.6619568                           |
| 3202818091                                 | 473.2957458                            | 166.28597                                      | 277.1996002                                 | -363.722168                            |
| 1245218559                                 | 373.2679443                            | 142.2553956                                    | 222.8453247                                 | -425.1409607                           |
| 938634859.2                                | 355.4464417                            | 124.0533058                                    | 172.7803894                                 | -351.3468018                           |
| 1642846825                                 | 493.6896667                            | 139.4039631                                    | 232.8233185                                 | -293.6687927                           |
| 473420539.3                                | 307.6212463                            | 114.3050474                                    | 170.614743                                  | -325.0202637                           |
| 973763243.6                                | 379.4894104                            | 122.6878059                                    | 195.1917038                                 | -199.2651672                           |
| 444701953.7                                | 426.0873718                            | 131.1202843                                    | 227.8428223                                 | -177.1287842                           |
| 719167556.6                                | 351.1849365                            | 124.9155202                                    | 211.1175232                                 | -210.2200317                           |
| 1375782183                                 | 398.4905701                            | 147.5971078                                    | 178.6631439                                 | -515.8092651                           |
| 1280969268                                 | 400.8248596                            | 154.4436588                                    | 223.5167633                                 | -480.947876                            |
| 499830982.4                                | 489.8387451                            | 101.4411403                                    | 136.4450745                                 | -342.0258484                           |
| 1841462801                                 | 450.4766235                            | 144.4415475                                    | 229.1563843                                 | -365.0439148                           |
| 1136978331                                 | 352.3834229                            | 117.0611892                                    | 180.2835175                                 | -314.5193176                           |
| 1501706305                                 | 527.2054443                            | 151.0096566                                    | 240.8327423                                 | -347.5447998                           |
| 569089450.5                                | 325.8725586                            | 117.2948658                                    | 215.4780991                                 | -196.707901                            |
| 1039593636                                 | 357.973053                             | 127.0590876                                    | 172.0467926                                 | -412.330658                            |
| 1900084293                                 | 491.176178                             | 160.2030672                                    | 261.1151703                                 | -317.5735474                           |
| 700804516.1                                | 382.8454285                            | 133.1514884                                    | 223.5171646                                 | -207.5666504                           |
| 946915289.4                                | 415.3361816                            | 131.6015998                                    | 214.5603973                                 | -284.0620728                           |
| 589262381                                  | 337.2714539                            | 129.3700304                                    | 236.7215347                                 | -110.7445526                           |
| 1697164479                                 | 473.762146                             | 162.4460689                                    | 274.0821228                                 | -215.7198029                           |
| 2022781280                                 | 398.7724609                            | 120.2269906                                    | 179.7565699                                 | -474.5790405                           |
| 1761071153                                 | 422.6564026                            | 140.588436                                     | 227.3551636                                 | -326.2123108                           |
| 1398693083                                 | 405.1838989                            | 109.1025467                                    | 168.0780716                                 | -300.7850037                           |
| 2121256549                                 | 457.3601685                            | 151.5216578                                    | 259.0353363                                 | -485.7687988                           |
| 1352759798                                 | 422.9434204                            | 133.3629024                                    | 212.2352203                                 | -238.9549561                           |
| 330712024.3                                | 240.8067017                            | 108.1607699                                    | 117.5425583                                 | -459.7459717                           |
| 184045063.8                                | 236.8329315                            | 90.40598441                                    | 142.1419083                                 | -199.9896088                           |
| 3218686040                                 | 419.7624207                            | 143.6875158                                    | 243.804509                                  | -246.4768372                           |

| log.sigma.4.0.mm.3D_firstorder_Entropy | log.sigma.4.0.mm.3D_firstorder_StandardDeviation | log.sigma.4.0.mm.3D_firstorder_Range | log.sigma.4.0.mm.3D_firstorder_Variance | log.sigma.4.0.mm.3D_firstorder_10Percentile |
|----------------------------------------|--------------------------------------------------|--------------------------------------|-----------------------------------------|---------------------------------------------|
| 4.463013975                            | 140.7416259                                      | 891.1464233                          | 19808.20527                             | -137.5057419                                |
| 3.588758435                            | 79.53148478                                      | 431.7550583                          | 6325.257072                             | 2.716003275                                 |
| 4.085273811                            | 104.0524834                                      | 622.5480347                          | 10826.91931                             | -13.78241301                                |
| 4.312252202                            | 128.8667453                                      | 716.8773499                          | 16606.63803                             | -142.1560121                                |
| 3.946843293                            | 94.65590016                                      | 648.7449036                          | 8959.739435                             | -44.8611599                                 |
| 3.98549193                             | 108.613078                                       | 577.4332733                          | 11796.80072                             | -24.57772408                                |
| 4.132279778                            | 107.9371656                                      | 907.9015503                          | 11650.43172                             | -26.30408669                                |
| 4.102184782                            | 110.2201208                                      | 878.0848999                          | 12148.47504                             | -7.874757957                                |
| 4.190843921                            | 111.6617387                                      | 818.3526611                          | 12468.3439                              | -30.62014961                                |
| 4.07453211                             | 109.0532701                                      | 840.1329651                          | 11892.61571                             | -3.063761854                                |
| 3.841235177                            | 87.44489365                                      | 518.8595886                          | 7646.609426                             | -29.62474709                                |
| 4.123191785                            | 108.1399473                                      | 759.4180908                          | 11694.24821                             | -9.270345879                                |
| 3.787498375                            | 96.90639189                                      | 698.8642273                          | 9390.848788                             | -25.26337395                                |
| 4.148450544                            | 115.7625101                                      | 772.446167                           | 13400.95874                             | -32.11434784                                |
| 4.147734458                            | 111.8963048                                      | 780.633728                           | 12520.78303                             | -62.78513947                                |
| 4.249188322                            | 116.9515605                                      | 740.9942627                          | 13677.66751                             | -47.31859398                                |
| 3.900797846                            | 99.23076169                                      | 646.0394592                          | 9846.744065                             | -58.75288048                                |
| 3.711375533                            | 90.43207219                                      | 493.4208069                          | 8177.959681                             | -17.48143044                                |
| 3.573328499                            | 76.52467494                                      | 413.2945328                          | 5856.025874                             | -16.35796146                                |
| 4.250752599                            | 116.3428847                                      | 772.8147888                          | 13535.66682                             | -25.48570404                                |
| 3.732742614                            | 83.90181343                                      | 609.6947174                          | 7039.514297                             | -4.413815975                                |
| 3.79575013                             | 85.7556557                                       | 460.5188599                          | 7354.017026                             | -16.06524124                                |
| 3.894921829                            | 95.28141739                                      | 511.9459381                          | 9078.548501                             | -17.30628834                                |
| 3.886770615                            | 91.11640151                                      | 680.0769806                          | 8302.198624                             | -18.02210503                                |
| 4.052680461                            | 103.2033054                                      | 732.3480225                          | 10650.92224                             | -18.84795876                                |
| 4.271302007                            | 122.7802876                                      | 936.858429                           | 15074.99902                             | -38.90023117                                |
| 4.274868357                            | 126.9940923                                      | 962.7178955                          | 16127.49948                             | -46.39231415                                |
| 3.938849286                            | 95.92381252                                      | 694.8206177                          | 9201.377809                             | -30.9883618                                 |
| 3.599343796                            | 83.15583092                                      | 392.9776535                          | 6914.892216                             | -1.461732388                                |
| 3.707809957                            | 80.9225706                                       | 628.9285583                          | 6548.462432                             | 0.790535253                                 |
| 4.073749356                            | 104.6372658                                      | 819.0001221                          | 10948.95739                             | -14.48566866                                |
| 3.512667633                            | 82.97627318                                      | 702.526947                           | 6885.061911                             | -52.82031784                                |
| 4.375439731                            | 129.1444688                                      | 870.696991                           | 16678.29383                             | -152.8892517                                |
| 4.254219143                            | 120.8580082                                      | 821.4263                             | 14606.65814                             | -80.95786133                                |
| 4.062355798                            | 102.8148118                                      | 716.7782288                          | 10570.88553                             | -4.312397718                                |
| 3.927928228                            | 96.01289394                                      | 727.2685852                          | 9218.475802                             | 2.158456421                                 |
| 3.862812544                            | 104.199677                                       | 957.2148743                          | 10857.57268                             | -40.71900558                                |
| 4.383687232                            | 132.8497332                                      | 1009.911224                          | 17649.05162                             | -78.45439148                                |
| 3.184016187                            | 55.55807139                                      | 352.4133759                          | 3086.699297                             | -6.319317818                                |
| 4.414995234                            | 129.636525                                       | 789.5451355                          | 16805.62863                             | -102.8053703                                |
| 3.921732905                            | 104.3324782                                      | 816.467804                           | 10885.26601                             | -87.64760056                                |
| 4.391092596                            | 129.6383643                                      | 978.1655273                          | 16806.1055                              | -103.6900116                                |
| 4.21579736                             | 113.3669271                                      | 759.9548645                          | 12852.06017                             | -25.50624504                                |
| 4.029887408                            | 102.3361352                                      | 891.3833008                          | 10472.68457                             | -63.48598099                                |
| 3.894296648                            | 97.49579065                                      | 601.823288                           | 9505.429194                             | -17.25290966                                |
| 4.195216662                            | 113.4225824                                      | 803.1989136                          | 12864.6822                              | -13.36142731                                |
| 4.006904232                            | 99.35971719                                      | 774.5529785                          | 9872.353401                             | -11.80450239                                |
| 3.553756085                            | 76.16293819                                      | 370.4654922                          | 5800.793154                             | -1.384528637                                |
| 4.058404199                            | 102.8593163                                      | 596.4683533                          | 10580.03895                             | -35.60832977                                |
| 3.770798093                            | 89.21440621                                      | 576.5429688                          | 7959.210276                             | 3.400050044                                 |
| 4.19941611                             | 113.513123                                       | 709.5644531                          | 12885.2291                              | -10.2016573                                 |
| 4.277761387                            | 118.3998629                                      | 834.2776794                          | 14018.52753                             | -63.83289719                                |
| 3.968678049                            | 96.14138522                                      | 691.8320923                          | 9243.165952                             | -36.32942848                                |
| 3.99301794                             | 97.98399579                                      | 593.9428864                          | 9600.863432                             | 16.747686                                   |
| 4.092870753                            | 107.4276684                                      | 583.5174408                          | 11540.70393                             | -5.389048721                                |
| 3.885230974                            | 93.03432436                                      | 826.6999817                          | 8655.385508                             | -25.77818108                                |
| 4.248782255                            | 115.8916674                                      | 734.5533142                          | 13430.87856                             | -48.4848257                                 |
| 4.053998222                            | 110.6996744                                      | 775.6685791                          | 12254.41791                             | -51.26248474                                |
| 3.749278981                            | 83.96123652                                      | 621.696167                           | 7049.489237                             | -47.28828239                                |
| 4.139415514                            | 108.6398122                                      | 895.4403076                          | 11802.6088                              | -59.96903305                                |
| 3.899173566                            | 99.59991909                                      | 753.0188446                          | 9920.143883                             | -26.03366852                                |
| 4.082315259                            | 105.5214887                                      | 748.1673584                          | 11134.78457                             | -18.14212551                                |
| 4.177042189                            | 112.6591319                                      | 958.6765442                          | 12692.08001                             | -11.28377094                                |
| 4.13587303                             | 113.0416743                                      | 887.7489624                          | 12778.42012                             | -42.32058563                                |
| 3.808623217                            | 86.94506247                                      | 558.8921814                          | 7559.443888                             | 0.019685586                                 |
| 3.993217403                            | 105.1827193                                      | 859.6846924                          | 11063.40445                             | -25.36701527                                |
| 3.376815764                            | 66.96574949                                      | 539.4729614                          | 4484.411605                             | -30.72326508                                |
| 4.20417325                             | 116.4767654                                      | 991.0493164                          | 13566.83688                             | -78.5532486                                 |
| 4.118900651                            | 109.0116758                                      | 878.6767578                          | 11883.54545                             | -43.70596466                                |
| 3.708914792                            | 80.9861181                                       | 575.3889618                          | 6558.751325                             | -5.127304316                                |
| 3.981016765                            | 103.5457774                                      | 722.2625732                          | 10721.72802                             | -29.88196182                                |
| 4.184049109                            | 114.8577562                                      | 837.0179138                          | 13192.30415                             | -1.158819151                                |
| 4.021100886                            | 106.5900805                                      | 798.408905                           | 11361.44525                             | -19.30686722                                |
| 4.237985464                            | 118.0617067                                      | 706.7932434                          | 13938.56659                             | -123.7115738                                |
| 4.328471701                            | 124.5870667                                      | 787.3584595                          | 15521.9372                              | -88.49820709                                |
| 3.821415861                            | 92.82228264                                      | 632.64151                            | 8615.976155                             | -48.1764328                                 |
| 3.708849238                            | 79.71184584                                      | 79.71184584                          | 6353.978367                             | 0.963908315                                 |
| 3.881649167                            | 98.55939049                                      | 603.216156                           | 9713.953454                             | -13.08305569                                |
| 3.81516307                             | 87.16746279                                      | 561.4049683                          | 7598.16657                              | -12.35316067                                |
| 4.3914855                              | 143.0495323                                      | 914.2998352                          | 20463.16869                             | -168.1340912                                |
| 4.473843419                            | 144.7909732                                      | 881.7727356                          | 20964.42592                             | -138.9074768                                |
| 3.83232318                             | 95.01379792                                      | 831.8645935                          | 9027.621795                             | -76.97842255                                |
| 4.121617649                            | 107.8380788                                      | 815.5205383                          | 11629.05123                             | -31.35201607                                |
| 3.869452663                            | 92.67465343                                      | 666.9027405                          | 8588.591389                             | -45.91926956                                |
| 4.355140612                            | 125.759832                                       | 874.7502441                          | 15815.53534                             | -79.93009644                                |
| 3.623800768                            | 83.51718714                                      | 522.5804596                          | 6975.120548                             | -3.682181263                                |
| 4.231239548                            | 122.7514076                                      | 770.3037109                          | 15067.90807                             | -145.3818604                                |
| 4.086796995                            | 105.9661498                                      | 808.7497253                          | 11228.82491                             | -0.332607855                                |
| 3.911110608                            | 93.11484584                                      | 590.4120789                          | 8670.374516                             | -13.06889019                                |
| 3.989234463                            | 99.89095636                                      | 699.3982544                          | 9978.203163                             | -25.61620674                                |
| 3.551586725                            | 92.87520423                                      | 448.0160065                          | 8625.803561                             | -2.974405456                                |
| 4.2707081                              | 118.3746543                                      | 689.4819489                          | 14012.55877                             | -35.23796654                                |
| 4.063056206                            | 106.2184041                                      | 873.3515015                          | 11281.5846                              | -76.69443207                                |
| 3.996773094                            | 99.22613718                                      | 748.8687134                          | 9845.8263                               | -18.51342144                                |
| 3.987757822                            | 96.63978495                                      | 705.9689026                          | 9339.248035                             | -78.93466415                                |
| 4.235466452                            | 124.4527303                                      | 943.1289673                          | 15488.48209                             | -38.32453842                                |
| 4.206375359                            | 114.3426734                                      | 661.8983765                          | 13074.24696                             | -83.74700623                                |
| 3.795845904                            | 107.1805281                                      | 700.5526733                          | 11487.6656                              | -109.4420212                                |
| 3.495080286                            | 69.45788921                                      | 436.8225403                          | 4824.398373                             | -28.28244095                                |
| 3.979489599                            | 98.65295515                                      | 666.2392578                          | 9732.40556                              | -7.097352505                                |

| log.sigma.4.0.mm.3D_firstorder_Kurtosis | log.sigma.4.0.mm.3D_firstorder_Mean | log.sigma.4.0.mm.3D_glrIm_ShortRunLowGrayLevelEmphasis | log.sigma.4.0.mm.3D_glrIm_GrayLevelVariance |
|-----------------------------------------|-------------------------------------|--------------------------------------------------------|---------------------------------------------|
| 3.803796444                             | 55.50083541                         | 0.003673771                                            | 33.00380893                                 |
| 2.974391214                             | 91.96310408                         | 0.028207879                                            | 10.61878734                                 |
| 2.756722756                             | 118.9643665                         | 0.00902418                                             | 17.64130463                                 |
| 2.978332847                             | 51.39353466                         | 0.008387658                                            | 27.0650449                                  |
| 3.227787058                             | 70.0058717                          | 0.005746777                                            | 14.96401531                                 |
| 2.614755709                             | 93.64189196                         | 0.013679222                                            | 19.39701039                                 |
| 3.444686877                             | 101.6337769                         | 0.005887192                                            | 19.21344387                                 |
| 4.119124064                             | 105.1743505                         | 0.002841648                                            | 20.48288291                                 |
| 3.278768316                             | 107.1834742                         | 0.00327496                                             | 20.56034805                                 |
| 4.771332968                             | 118.4773138                         | 0.002987958                                            | 19.78072689                                 |
| 2.832536407                             | 77.03189429                         | 0.012337234                                            | 12.69441538                                 |
| 3.247942687                             | 116.4417454                         | 0.0049527                                              | 19.34734906                                 |
| 4.812046715                             | 62.80684955                         | 0.005601888                                            | 16.61708522                                 |
| 4.322449186                             | 81.46650496                         | 0.005109014                                            | 22.7535728                                  |
| 3.96466509                              | 81.20563079                         | 0.006898034                                            | 21.15388138                                 |
| 2.851929178                             | 98.09253574                         | 0.00559648                                             | 22.39653986                                 |
| 4.357772262                             | 68.4928957                          | 0.005854498                                            | 16.3669963                                  |
| 3.15382495                              | 78.34296884                         | 0.016893955                                            | 14.08129556                                 |
| 2.52773197                              | 73.7503262                          | 0.023018202                                            | 9.617070076                                 |
| 3.071671505                             | 113.9265088                         | 0.006947082                                            | 22.35945582                                 |
| 3.367438375                             | 87.36666389                         | 0.010492814                                            | 11.99692855                                 |
| 2.527705627                             | 88.71813263                         | 0.019655354                                            | 11.95290194                                 |
| 2.93126638                              | 91.87616011                         | 0.013831928                                            | 15.10806522                                 |
| 3.580070372                             | 87.2730401                          | 0.007257632                                            | 14.07500039                                 |
| 3.790259504                             | 105.2488198                         | 0.004345323                                            | 17.80709269                                 |
| 4.662327123                             | 103.4330075                         | 0.004061761                                            | 25.18892578                                 |
| 5.029826776                             | 92.5107748                          | 0.002987824                                            | 27.02365428                                 |
| 3.564309051                             | 75.82879168                         | 0.004740985                                            | 15.45539455                                 |
| 2.467769871                             | 87.35544839                         | 0.018514039                                            | 11.34773873                                 |
| 3.82132563                              | 94.25854021                         | 0.00525695                                             | 11.18526515                                 |
| 3.588818537                             | 103.4055322                         | 0.002824623                                            | 18.21213545                                 |
| 7.643873605                             | 34.49818453                         | 0.004114754                                            | 12.19667797                                 |
| 3.159407433                             | 61.63597907                         | 0.004488004                                            | 27.39978071                                 |
| 3.678169636                             | 85.88857202                         | 0.004129641                                            | 24.31623989                                 |
| 3.338028137                             | 118.8597075                         | 0.004417978                                            | 17.29730684                                 |
| 3.976163812                             | 103.8847972                         | 0.003411055                                            | 15.50537356                                 |
| 7.163759668                             | 50.72053585                         | 0.002455097                                            | 19.19663313                                 |
| 3.395378431                             | 82.51645706                         | 0.002572755                                            | 29.87929269                                 |
| 3.265590034                             | 62.91145861                         | 0.017936508                                            | 5.193364719                                 |
| 2.876419149                             | 67.0501892                          | 0.008778343                                            | 27.29589969                                 |
| 5.507058911                             | 42.88626501                         | 0.003808588                                            | 18.80938422                                 |
| 3.768823078                             | 60.269564                           | 0.004532167                                            | 27.39814797                                 |
| 3.161387734                             | 111.0801714                         | 0.004504953                                            | 21.01846237                                 |
| 4.108766116                             | 69.35375035                         | 0.005563905                                            | 17.50182709                                 |
| 2.943758432                             | 126.8881747                         | 0.010801375                                            | 15.99720722                                 |
| 3.881327231                             | 119.8230676                         | 0.005595328                                            | 21.52896419                                 |
| 3.602967197                             | 100.6264355                         | 0.004202939                                            | 16.63552155                                 |
| 2.581163318                             | 83.49932926                         | 0.026621494                                            | 9.773268861                                 |
| 2.975956462                             | 84.73171742                         | 0.011298549                                            | 17.44906034                                 |
| 3.302667429                             | 102.1680724                         | 0.016423536                                            | 13.21686277                                 |
| 3.367282914                             | 125.1297339                         | 0.008884409                                            | 21.235248                                   |
| 2.988998628                             | 89.01890497                         | 0.004747972                                            | 22.81198233                                 |
| 3.339491703                             | 78.41715999                         | 0.006346933                                            | 15.45704909                                 |
| 2.746143517                             | 135.2789383                         | 0.009406877                                            | 15.89973995                                 |
| 2.352107883                             | 122.2830557                         | 0.01458435                                             | 18.77536489                                 |
| 4.39591842                              | 80.70514459                         | 0.003536372                                            | 14.57810714                                 |
| 3.053891359                             | 101.4687971                         | 0.004846569                                            | 22.12646869                                 |
| 5.276135134                             | 73.19838156                         | 0.003909366                                            | 20.66062302                                 |
| 4.204549351                             | 51.26570142                         | 0.006080287                                            | 11.99026024                                 |
| 3.585009494                             | 62.79728217                         | 0.002609453                                            | 19.74476851                                 |
| 3.945781927                             | 81.81992062                         | 0.006878522                                            | 16.94230544                                 |
| 2.937318025                             | 106.020309                          | 0.004889671                                            | 18.31238888                                 |
| 4.166796989                             | 115.3269422                         | 0.002850657                                            | 20.89434965                                 |
| 3.571027198                             | 79.2334378                          | 0.003167214                                            | 21.31120837                                 |
| 2.942502302                             | 108.3294343                         | 0.00871347                                             | 12.47742272                                 |
| 4.677476186                             | 76.31906889                         | 0.002977301                                            | 19.10191809                                 |
| 5.314499992                             | 41.21083132                         | 0.009494339                                            | 7.977516038                                 |
| 4.142099114                             | 59.55391039                         | 0.003173005                                            | 22.82977015                                 |
| 3.904483716                             | 89.01919029                         | 0.002884244                                            | 19.95485019                                 |
| 3.15077301                              | 87.08183938                         | 0.006832672                                            | 10.9689205                                  |
| 4.755131656                             | 74.26805616                         | 0.005301839                                            | 18.12965624                                 |
| 3.713997505                             | 120.2444164                         | 0.003499804                                            | 22.00789539                                 |
| 5.346617379                             | 94.2080269                          | 0.003064173                                            | 19.22401798                                 |
| 3.307085059                             | 38.08747952                         | 0.006235542                                            | 22.91233664                                 |
| 3.192178983                             | 62.54220759                         | 0.007719523                                            | 25.34464841                                 |
| 4.707917212                             | 66.70582955                         | 0.005493734                                            | 14.82923254                                 |
| 3.500249235                             | 93.26478084                         | 0.010322205                                            | 10.8302259                                  |
| 3.680624662                             | 86.47875745                         | 0.010541353                                            | 16.5405108                                  |
| 3.031146731                             | 89.47469262                         | 0.007948253                                            | 12.6898589                                  |
| 4.279558639                             | 36.35570842                         | 0.003666798                                            | 33.70129124                                 |
| 4.065018666                             | 53.74400272                         | 0.004268211                                            | 34.83598959                                 |
| 5.612661757                             | 35.53425329                         | 0.007837748                                            | 15.71117523                                 |
| 3.868037786                             | 96.09531425                         | 0.003533817                                            | 19.40487229                                 |
| 4.263405281                             | 71.51734494                         | 0.005317239                                            | 14.26440421                                 |
| 3.433979473                             | 83.59653721                         | 0.005841045                                            | 26.15853336                                 |
| 3.005788848                             | 82.35875786                         | 0.00911501                                             | 11.61963448                                 |
| 3.912826005                             | 32.80401913                         | 0.005311731                                            | 25.35730252                                 |
| 3.232268613                             | 120.1507296                         | 0.003991749                                            | 18.83695457                                 |
| 3.07479279                              | 95.1784868                          | 0.008548277                                            | 14.520319                                   |
| 3.976949842                             | 85.67833971                         | 0.007393122                                            | 17.05059301                                 |
| 2.256959421                             | 90.05998676                         | 0.016077641                                            | 14.40268361                                 |
| 2.959728874                             | 111.2482203                         | 0.011494954                                            | 22.89709896                                 |
| 4.710610212                             | 56.32889721                         | 0.003008985                                            | 18.98389007                                 |
| 3.734268607                             | 99.59559249                         | 0.003822315                                            | 16.57492936                                 |
| 3.214203194                             | 50.63711748                         | 0.00570026                                             | 15.41097326                                 |
| 4.576316139                             | 86.43107485                         | 0.00268929                                             | 26.22050034                                 |
| 2.996295028                             | 68.63976094                         | 0.01290379                                             | 21.47236439                                 |
| 6.779495535                             | 14.52881774                         | 0.00622013                                             | 20.09602488                                 |
| 3.404557255                             | 57.86919426                         | 0.013503327                                            | 8.091434348                                 |
| 2.850069156                             | 104.4686395                         | 0.00649908                                             | 15.99067276                                 |



| log.sigma.4.0.mm.3D_glrIm_LowGrayLevelRunEmphasis | log.sigma.4.0.mm.3D_glrIm_GrayLevelNonUniformityNormalized | log.sigma.4.0.mm.3D_glrIm_RunVariance | log.sigma.4.0.mm.3D_glrIm_GrayLevelNonUniformity |
|---------------------------------------------------|------------------------------------------------------------|---------------------------------------|--------------------------------------------------|
| 0.003817037                                       | 0.054507741                                                | 0.118144471                           | 105.8369028                                      |
| 0.030829515                                       | 0.097079275                                                | 0.211668219                           | 78.28796309                                      |
| 0.00974352                                        | 0.066901989                                                | 0.192152418                           | 90.17818331                                      |
| 0.008895487                                       | 0.059619379                                                | 0.122370792                           | 52.81278958                                      |
| 0.006185622                                       | 0.076109992                                                | 0.175121826                           | 159.2959742                                      |
| 0.014887166                                       | 0.072677229                                                | 0.17106448                            | 42.34817329                                      |
| 0.006375973                                       | 0.066419902                                                | 0.175721339                           | 333.1800715                                      |
| 0.003063729                                       | 0.070986006                                                | 0.184174237                           | 319.7285805                                      |
| 0.003525614                                       | 0.063736583                                                | 0.159844511                           | 257.3904422                                      |
| 0.003132412                                       | 0.068149402                                                | 0.143849019                           | 65.58129                                         |
| 0.01332236                                        | 0.079242248                                                | 0.176370738                           | 105.3355584                                      |
| 0.005306541                                       | 0.067274853                                                | 0.154768852                           | 138.2454752                                      |
| 0.006195886                                       | 0.092154891                                                | 0.344404493                           | 142.3997001                                      |
| 0.005442395                                       | 0.069279624                                                | 0.171702509                           | 104.83432                                        |
| 0.007247566                                       | 0.070249843                                                | 0.159444897                           | 125.1379245                                      |
| 0.006002294                                       | 0.060458048                                                | 0.158619354                           | 237.9260011                                      |
| 0.00616398                                        | 0.080680928                                                | 0.130805333                           | 86.49658648                                      |
| 0.018684682                                       | 0.090500308                                                | 0.230632372                           | 94.99797457                                      |
| 0.025291342                                       | 0.094924316                                                | 0.207500508                           | 106.0100125                                      |
| 0.007490423                                       | 0.060933559                                                | 0.148665148                           | 283.8777625                                      |
| 0.011696426                                       | 0.08769043                                                 | 0.296975779                           | 221.9443718                                      |
| 0.021278961                                       | 0.080590533                                                | 0.151662409                           | 77.22785897                                      |
| 0.015114736                                       | 0.078496683                                                | 0.197206225                           | 70.04321942                                      |
| 0.007829298                                       | 0.079585217                                                | 0.191008952                           | 184.4995203                                      |
| 0.004578439                                       | 0.070899575                                                | 0.16204965                            | 81.25539485                                      |
| 0.004273688                                       | 0.064174505                                                | 0.128595422                           | 138.0236978                                      |
| 0.003165998                                       | 0.065726898                                                | 0.166575859                           | 190.6512347                                      |
| 0.00513724                                        | 0.077783981                                                | 0.174548355                           | 188.8220861                                      |
| 0.020641342                                       | 0.092811307                                                | 0.181526493                           | 36.13364113                                      |
| 0.005780232                                       | 0.092386368                                                | 0.209430614                           | 162.9895034                                      |
| 0.003065967                                       | 0.06984244                                                 | 0.20430657                            | 290.9171609                                      |
| 0.004460223                                       | 0.111670794                                                | 0.275543185                           | 194.5924892                                      |
| 0.004762226                                       | 0.057178367                                                | 0.138457514                           | 166.5100819                                      |
| 0.004356493                                       | 0.062977415                                                | 0.160166405                           | 132.8668189                                      |
| 0.004790606                                       | 0.068991942                                                | 0.14786611                            | 272.419647                                       |
| 0.003687707                                       | 0.076234233                                                | 0.220250702                           | 199.1470129                                      |
| 0.002676929                                       | 0.089787245                                                | 0.259016141                           | 284.535634                                       |
| 0.002805128                                       | 0.055504317                                                | 0.302356365                           | 246.1236917                                      |
| 0.019687293                                       | 0.125242414                                                | 0.233703789                           | 130.1779001                                      |
| 0.009454327                                       | 0.054038159                                                | 0.125307045                           | 356.1320441                                      |
| 0.004077829                                       | 0.084778739                                                | 0.213514808                           | 191.3888849                                      |
| 0.004803166                                       | 0.057246607                                                | 0.10552133                            | 202.8367359                                      |
| 0.004788733                                       | 0.062725578                                                | 0.136483525                           | 207.4751403                                      |
| 0.005937875                                       | 0.073472195                                                | 0.150004908                           | 162.855621                                       |
| 0.01181268                                        | 0.078734294                                                | 0.171889949                           | 88.43536324                                      |
| 0.005995173                                       | 0.065019369                                                | 0.151212499                           | 159.9196185                                      |
| 0.004549256                                       | 0.073973527                                                | 0.177406288                           | 297.4322914                                      |
| 0.02970626                                        | 0.094980793                                                | 0.228371003                           | 70.64728991                                      |
| 0.012061854                                       | 0.069183159                                                | 0.147412187                           | 52.53639456                                      |
| 0.018335687                                       | 0.082833837                                                | 0.25214435                            | 96.21376054                                      |
| 0.009464563                                       | 0.063270539                                                | 0.141169303                           | 146.0939746                                      |
| 0.005031249                                       | 0.059792682                                                | 0.108174041                           | 184.3025564                                      |
| 0.006874781                                       | 0.075801997                                                | 0.170764809                           | 300.9774356                                      |
| 0.009993268                                       | 0.071290011                                                | 0.137606398                           | 70.97702761                                      |
| 0.01572298                                        | 0.064956111                                                | 0.150135274                           | 77.3177042                                       |
| 0.003798163                                       | 0.081590337                                                | 0.174869429                           | 140.0163429                                      |
| 0.005144208                                       | 0.06049155                                                 | 0.132772325                           | 221.1964397                                      |
| 0.004196779                                       | 0.075039629                                                | 0.189767269                           | 227.3170922                                      |
| 0.006493508                                       | 0.088964379                                                | 0.179562403                           | 128.9043989                                      |
| 0.002850495                                       | 0.067024405                                                | 0.23811275                            | 531.5663405                                      |
| 0.007546513                                       | 0.080805299                                                | 0.22587736                            | 123.2637347                                      |
| 0.005275049                                       | 0.067664094                                                | 0.167159494                           | 160.0661656                                      |
| 0.003246407                                       | 0.066239541                                                | 0.14916213                            | 343.7292685                                      |
| 0.003463737                                       | 0.068684796                                                | 0.178846365                           | 460.6737762                                      |
| 0.009335311                                       | 0.080561197                                                | 0.169325808                           | 56.47243766                                      |
| 0.003250587                                       | 0.077473555                                                | 0.250248955                           | 255.9945514                                      |
| 0.010680003                                       | 0.115883665                                                | 0.314962911                           | 123.0044442                                      |
| 0.003436576                                       | 0.067590748                                                | 0.169155009                           | 373.6898103                                      |
| 0.003079836                                       | 0.069008516                                                | 0.166232451                           | 359.9018761                                      |
| 0.007534719                                       | 0.087382032                                                | 0.242405715                           | 215.6373533                                      |
| 0.005691092                                       | 0.076685871                                                | 0.180035045                           | 87.33767753                                      |
| 0.003768918                                       | 0.065666737                                                | 0.193247666                           | 247.6035271                                      |
| 0.003249157                                       | 0.074910053                                                | 0.180757902                           | 150.9908434                                      |
| 0.006545817                                       | 0.062592152                                                | 0.116708904                           | 128.9033033                                      |
| 0.008274229                                       | 0.059107338                                                | 0.133962536                           | 167.0571477                                      |
| 0.005842256                                       | 0.086097434                                                | 0.183950454                           | 100.8671384                                      |
| 0.011272674                                       | 0.089000582                                                | 0.239170899                           | 182.7981813                                      |
| 0.011639671                                       | 0.082094033                                                | 0.233343285                           | 67.29251045                                      |
| 0.008649544                                       | 0.082712777                                                | 0.179820101                           | 123.6833363                                      |
| 0.003838979                                       | 0.059917915                                                | 0.120762843                           | 127.5816802                                      |
| 0.004432514                                       | 0.054505949                                                | 0.11762013                            | 99.28467323                                      |
| 0.008486981                                       | 0.089660569                                                | 0.207644238                           | 139.8309389                                      |
| 0.003800547                                       | 0.070004054                                                | 0.195119293                           | 202.6035077                                      |
| 0.005791455                                       | 0.083124298                                                | 0.180597945                           | 222.7398888                                      |
| 0.006219212                                       | 0.058367876                                                | 0.149272235                           | 128.1810631                                      |
| 0.010303518                                       | 0.095101444                                                | 0.292257122                           | 120.9024924                                      |
| 0.005614167                                       | 0.065200385                                                | 0.158744125                           | 139.0637774                                      |
| 0.00428732                                        | 0.068210773                                                | 0.193225263                           | 164.9479752                                      |
| 0.009218061                                       | 0.07798483                                                 | 0.186953741                           | 100.3991013                                      |
| 0.007887788                                       | 0.075837228                                                | 0.211858308                           | 133.3832146                                      |
| 0.019076788                                       | 0.094210318                                                | 0.338033681                           | 100.4031293                                      |
| 0.012132478                                       | 0.060117614                                                | 0.125395322                           | 130.0903455                                      |
| 0.003211627                                       | 0.073377353                                                | 0.163421489                           | 336.8397698                                      |
| 0.004093872                                       | 0.07463757                                                 | 0.176451382                           | 218.1996406                                      |
| 0.006122384                                       | 0.073827779                                                | 0.146870329                           | 286.3795689                                      |
| 0.002891066                                       | 0.064512732                                                | 0.219393195                           | 193.1440332                                      |
| 0.013957027                                       | 0.063545249                                                | 0.156987916                           | 158.7690513                                      |
| 0.006701687                                       | 0.090926382                                                | 0.265456659                           | 79.95022476                                      |
| 0.014809806                                       | 0.103858894                                                | 0.226629455                           | 73.25063517                                      |
| 0.007030507                                       | 0.0721189459                                               | 0.199888969                           | 366.3718218                                      |

| log.sigma.4.0.mm.3D_glrIm_LongRunEmphasis | log.sigma.4.0.mm.3D_glrIm_ShortRunHighGrayLevelEmphasis | log.sigma.4.0.mm.3D_glrIm_RunLengthNonUniformity | log.sigma.4.0.mm.3D_glrIm_ShortRunEmphasis |
|-------------------------------------------|---------------------------------------------------------|--------------------------------------------------|--------------------------------------------|
| 1.316605108                               | 509.3928735                                             | 1650.702336                                      | 0.93719882                                 |
| 1.568969704                               | 71.01993572                                             | 618.1798893                                      | 0.895506479                                |
| 1.497106442                               | 177.1533063                                             | 1076.103981                                      | 0.911667194                                |
| 1.343403832                               | 279.994304                                              | 738.4571585                                      | 0.929495813                                |
| 1.462042775                               | 228.4672534                                             | 1679.522395                                      | 0.914323901                                |
| 1.466131569                               | 138.3764203                                             | 464.8167752                                      | 0.911591684                                |
| 1.451938157                               | 244.1570043                                             | 4071.157727                                      | 0.918466209                                |
| 1.476414407                               | 453.7873695                                             | 3608.462384                                      | 0.913800853                                |
| 1.434333504                               | 378.8711926                                             | 3265.358675                                      | 0.916813212                                |
| 1.392290135                               | 562.759297                                              | 792.4615759                                      | 0.923966669                                |
| 1.471383984                               | 133.8728218                                             | 1060.788703                                      | 0.911737297                                |
| 1.419014829                               | 289.7755601                                             | 1669.197813                                      | 0.919128011                                |
| 1.829223514                               | 244.1504523                                             | 1127.283788                                      | 0.875840576                                |
| 1.464415173                               | 343.9816048                                             | 1202.390229                                      | 0.910944676                                |
| 1.410425071                               | 276.8257304                                             | 1475.292838                                      | 0.925750872                                |
| 1.406608149                               | 272.880255                                              | 3279.192868                                      | 0.927412447                                |
| 1.375698546                               | 283.836205                                              | 875.3872067                                      | 0.921376006                                |
| 1.621138892                               | 99.14771635                                             | 786.1892232                                      | 0.887394204                                |
| 1.569710772                               | 73.21882605                                             | 853.2285931                                      | 0.893728681                                |
| 1.398603052                               | 233.5121719                                             | 3824.484783                                      | 0.923459042                                |
| 1.739778779                               | 141.2088417                                             | 1867.673794                                      | 0.880928064                                |
| 1.42485156                                | 103.4900275                                             | 770.8713762                                      | 0.915338872                                |
| 1.52510048                                | 128.5711577                                             | 698.9093036                                      | 0.904592045                                |
| 1.503363596                               | 192.1769772                                             | 1829.126986                                      | 0.907627993                                |
| 1.41249148                                | 341.4351143                                             | 958.4603731                                      | 0.927863645                                |
| 1.34748877                                | 460.1344146                                             | 1805.379441                                      | 0.931830749                                |
| 1.416972517                               | 523.7816406                                             | 2398.083654                                      | 0.925794534                                |
| 1.475698682                               | 264.8432757                                             | 1921.393456                                      | 0.909044051                                |
| 1.514767226                               | 87.24327778                                             | 302.2857888                                      | 0.900012186                                |
| 1.5774603                                 | 218.6112539                                             | 1337.376579                                      | 0.891547893                                |
| 1.517713487                               | 406.5063317                                             | 3313.510336                                      | 0.910337667                                |
| 1.70799723                                | 319.1993385                                             | 1288.721178                                      | 0.881250956                                |
| 1.372755634                               | 356.328882                                              | 2415.714714                                      | 0.927242329                                |
| 1.407689141                               | 390.06904                                               | 1751.969936                                      | 0.926966822                                |
| 1.396499778                               | 325.2139243                                             | 3245.575758                                      | 0.923807766                                |
| 1.545450935                               | 368.2045008                                             | 2067.074565                                      | 0.908432341                                |
| 1.662446413                               | 509.5692008                                             | 2396.651133                                      | 0.889467841                                |
| 1.668742875                               | 509.1561509                                             | 3474.255014                                      | 0.904349876                                |
| 1.648368093                               | 74.47052497                                             | 766.9618266                                      | 0.880178079                                |
| 1.346200985                               | 240.6240953                                             | 5500.304974                                      | 0.929873856                                |
| 1.548351104                               | 380.1932732                                             | 1769.092296                                      | 0.904633716                                |
| 1.298845564                               | 327.1913519                                             | 3008.087848                                      | 0.936979693                                |
| 1.366060066                               | 318.9221438                                             | 2771.430947                                      | 0.930069944                                |
| 1.41529814                                | 256.7943483                                             | 1792.95856                                       | 0.917509173                                |
| 1.476967981                               | 140.3983793                                             | 885.4501853                                      | 0.907320744                                |
| 1.4023613                                 | 329.3299314                                             | 2021.599219                                      | 0.92361041                                 |
| 1.471815002                               | 298.28778                                               | 3212.897879                                      | 0.91251795                                 |
| 1.619873597                               | 65.48246778                                             | 561.9847687                                      | 0.888526473                                |
| 1.412376882                               | 169.412239                                              | 616.1001165                                      | 0.917985969                                |
| 1.632071954                               | 98.86877712                                             | 897.5352126                                      | 0.896069512                                |
| 1.383749163                               | 271.0288596                                             | 1903.186687                                      | 0.92483346                                 |
| 1.307351524                               | 293.6313631                                             | 2607.854086                                      | 0.935385563                                |
| 1.467580545                               | 209.6007388                                             | 3145.561462                                      | 0.909657662                                |
| 1.375630227                               | 170.2525749                                             | 827.4522743                                      | 0.927029667                                |
| 1.40386792                                | 139.2227915                                             | 974.4807294                                      | 0.922026727                                |
| 1.473691832                               | 404.0972596                                             | 1360.660745                                      | 0.90966182                                 |
| 1.361324712                               | 306.0170114                                             | 3039.096739                                      | 0.928119368                                |
| 1.501691434                               | 393.891002                                              | 2391.884041                                      | 0.90761592                                 |
| 1.480762925                               | 230.0175233                                             | 1146.899724                                      | 0.909281458                                |
| 1.572525129                               | 421.2477482                                             | 6251.662018                                      | 0.906794051                                |
| 1.577864363                               | 191.3719678                                             | 1179.41012                                       | 0.899924933                                |
| 1.447882037                               | 275.2565086                                             | 1902.104918                                      | 0.915154691                                |
| 1.397222501                               | 515.66196                                               | 4263.048751                                      | 0.924010471                                |
| 1.478212725                               | 379.1332293                                             | 5338.674111                                      | 0.910906139                                |
| 1.459110312                               | 162.1575138                                             | 567.3751495                                      | 0.914706074                                |
| 1.628283336                               | 440.3071273                                             | 2528.635149                                      | 0.895551491                                |
| 1.843843811                               | 155.3228605                                             | 737.1060562                                      | 0.856934994                                |
| 1.453106538                               | 420.8407123                                             | 4436.16222                                       | 0.914428512                                |
| 1.434321368                               | 422.367165                                              | 4244.970459                                      | 0.919776806                                |
| 1.631775291                               | 186.4069381                                             | 1860.94275                                       | 0.889717768                                |
| 1.493235673                               | 324.3990064                                             | 897.9564196                                      | 0.906523083                                |
| 1.49486695                                | 400.6384818                                             | 3009.756351                                      | 0.912186154                                |
| 1.469094925                               | 469.4449006                                             | 1623.066648                                      | 0.915091957                                |
| 1.323404732                               | 288.662366                                              | 1736.141838                                      | 0.93398367                                 |
| 1.366173025                               | 234.8497705                                             | 2346.982028                                      | 0.927712001                                |
| 1.506196138                               | 275.0251994                                             | 916.4956262                                      | 0.903777678                                |
| 1.61600046                                | 144.9212866                                             | 1572.407805                                      | 0.894713234                                |
| 1.616405851                               | 147.8931248                                             | 623.2435302                                      | 0.891587981                                |
| 1.491183006                               | 168.731545                                              | 1175.641277                                      | 0.906312871                                |
| 1.331978511                               | 514.6270943                                             | 1791.553997                                      | 0.933124753                                |
| 1.314504599                               | 508.39609                                               | 1551.56418                                       | 0.937833076                                |
| 1.54742545                                | 241.7272885                                             | 1208.799125                                      | 0.900654279                                |
| 1.488317039                               | 363.1542716                                             | 2351.968646                                      | 0.917213738                                |
| 1.50381256                                | 251.6914983                                             | 2084.954184                                      | 0.902025504                                |
| 1.393093957                               | 318.9394581                                             | 1825.511413                                      | 0.927063405                                |
| 1.757237293                               | 135.7277934                                             | 919.8547698                                      | 0.873649649                                |
| 1.41874333                                | 345.4067697                                             | 1744.622105                                      | 0.921630681                                |
| 1.483233091                               | 328.6260382                                             | 1950.44008                                       | 0.916456812                                |
| 1.490621155                               | 175.0976725                                             | 1025.174994                                      | 0.910614291                                |
| 1.551935                                  | 244.5547448                                             | 1372.672639                                      | 0.902327284                                |
| 1.853602819                               | 92.34308183                                             | 752.4032682                                      | 0.863314874                                |
| 1.342533587                               | 202.3739955                                             | 1815.282707                                      | 0.931599304                                |
| 1.443703426                               | 447.2526985                                             | 3681.698576                                      | 0.914215974                                |
| 1.456579799                               | 328.3032669                                             | 2361.852721                                      | 0.917075047                                |
| 1.411318621                               | 233.8475488                                             | 3140.052097                                      | 0.917709518                                |
| 1.535590113                               | 550.6971243                                             | 2381.858153                                      | 0.910746584                                |
| 1.433992681                               | 181.4614616                                             | 2007.204503                                      | 0.914842664                                |
| 1.703416211                               | 363.2561638                                             | 645.1307647                                      | 0.878009952                                |
| 1.640680843                               | 107.8870648                                             | 519.162627                                       | 0.878958052                                |
| 1.50162719                                | 214.9719602                                             | 4059.166521                                      | 0.912851271                                |

| log.sigma.4.0.mm.3D_glrIm_LongRunHighGrayLevelEmphasis | log.sigma.4.0.mm.3D_glrIm_RunPercentage | log.sigma.4.0.mm.3D_glrIm_LongRunLowGrayLevelEmphasis | log.sigma.4.0.mm.3D_glrIm_RunEntropy |
|--------------------------------------------------------|-----------------------------------------|-------------------------------------------------------|--------------------------------------|
| 727.9304872                                            | 0.914775611                             | 0.004516677                                           | 4.9134189                            |
| 116.4518161                                            | 0.861867544                             | 0.044473011                                           | 4.249944277                          |
| 287.6117108                                            | 0.878547789                             | 0.013701622                                           | 4.658373387                          |
| 403.8089912                                            | 0.906464058                             | 0.011211259                                           | 4.775421566                          |
| 361.5712187                                            | 0.883608368                             | 0.008483975                                           | 4.531496435                          |
| 202.9814567                                            | 0.882051282                             | 0.021117436                                           | 4.551620122                          |
| 370.6906222                                            | 0.887453548                             | 0.008998882                                           | 4.69728682                           |
| 714.1457792                                            | 0.881452925                             | 0.004265245                                           | 4.714038486                          |
| 586.9388204                                            | 0.888287252                             | 0.004824047                                           | 4.753455765                          |
| 840.8139673                                            | 0.89738806                              | 0.003873931                                           | 4.58164576                           |
| 213.7860051                                            | 0.881452765                             | 0.018350225                                           | 4.416842584                          |
| 441.0459137                                            | 0.89123978                              | 0.007098724                                           | 4.671110614                          |
| 482.1598724                                            | 0.825923942                             | 0.01002277                                            | 4.622782682                          |
| 538.6897281                                            | 0.881053716                             | 0.007168489                                           | 4.744013536                          |
| 426.8026468                                            | 0.89741005                              | 0.009044324                                           | 4.674495855                          |
| 405.6340251                                            | 0.898801153                             | 0.008163401                                           | 4.754423955                          |
| 437.1141501                                            | 0.897822446                             | 0.00758185                                            | 4.421066876                          |
| 163.6238615                                            | 0.850770479                             | 0.028474957                                           | 4.426369811                          |
| 124.5170551                                            | 0.860317648                             | 0.037383185                                           | 4.233706312                          |
| 340.6629498                                            | 0.895926731                             | 0.010200648                                           | 4.78741812                           |
| 260.2402678                                            | 0.836233211                             | 0.019213448                                           | 4.509658041                          |
| 158.6366886                                            | 0.888215584                             | 0.029062714                                           | 4.333403877                          |
| 206.8306099                                            | 0.870643029                             | 0.021895281                                           | 4.513094836                          |
| 309.0661868                                            | 0.875446805                             | 0.010937761                                           | 4.507851426                          |
| 515.5995853                                            | 0.899510544                             | 0.005901531                                           | 4.549818915                          |
| 661.4739                                               | 0.907685814                             | 0.005288207                                           | 4.760411005                          |
| 795.8924839                                            | 0.896571415                             | 0.004165141                                           | 4.811235805                          |
| 420.7070259                                            | 0.878738929                             | 0.007184321                                           | 4.552661986                          |
| 132.1377214                                            | 0.870246085                             | 0.031836257                                           | 4.183339691                          |
| 382.1420531                                            | 0.85840012                              | 0.008526704                                           | 4.399605948                          |
| 667.3366413                                            | 0.875141462                             | 0.004449024                                           | 4.694839379                          |
| 636.1525447                                            | 0.840948805                             | 0.00645999                                            | 4.300689471                          |
| 535.0099808                                            | 0.901946304                             | 0.006090482                                           | 4.880707275                          |
| 591.7782482                                            | 0.897545008                             | 0.005577571                                           | 4.768406271                          |
| 485.685139                                             | 0.896545099                             | 0.006599991                                           | 4.590986588                          |
| 610.8369682                                            | 0.870905687                             | 0.005326057                                           | 4.556834589                          |
| 943.7063927                                            | 0.849647531                             | 0.003974565                                           | 4.620999935                          |
| 880.7755018                                            | 0.858539639                             | 0.004416751                                           | 5.047285488                          |
| 144.1154871                                            | 0.844903064                             | 0.028838182                                           | 3.911495724                          |
| 344.8795932                                            | 0.906507248                             | 0.012572957                                           | 4.90137773                           |
| 670.2201856                                            | 0.869254493                             | 0.005528521                                           | 4.588102345                          |
| 449.7449114                                            | 0.916273796                             | 0.006073313                                           | 4.837260911                          |
| 467.9636829                                            | 0.905178041                             | 0.006254456                                           | 4.700308282                          |
| 401.1933266                                            | 0.890798912                             | 0.007769819                                           | 4.589526394                          |
| 211.8557877                                            | 0.878175033                             | 0.017032453                                           | 4.497151893                          |
| 493.1714704                                            | 0.895894634                             | 0.008020764                                           | 4.724928416                          |
| 468.5511459                                            | 0.881074428                             | 0.006390243                                           | 4.613348092                          |
| 109.5797061                                            | 0.853395743                             | 0.047054803                                           | 4.239840979                          |
| 256.075546                                             | 0.891982283                             | 0.015750412                                           | 4.576988942                          |
| 160.2430761                                            | 0.858443332                             | 0.029818054                                           | 4.434286198                          |
| 405.8046914                                            | 0.898763362                             | 0.012519979                                           | 4.715561807                          |
| 409.4752927                                            | 0.914382858                             | 0.006364126                                           | 4.728728617                          |
| 333.693704                                             | 0.879841789                             | 0.009569044                                           | 4.576953633                          |
| 247.557072                                             | 0.901477146                             | 0.012993036                                           | 4.479514011                          |
| 204.1924175                                            | 0.89496819                              | 0.021454023                                           | 4.600311817                          |
| 653.4836757                                            | 0.879763314                             | 0.005112375                                           | 4.486608244                          |
| 449.1470402                                            | 0.903907959                             | 0.006623061                                           | 4.748357828                          |
| 660.8919619                                            | 0.875739645                             | 0.005670055                                           | 4.68174311                           |
| 375.0560307                                            | 0.87887416                              | 0.008646748                                           | 4.362621414                          |
| 712.2568797                                            | 0.868474936                             | 0.004345911                                           | 4.787919547                          |
| 312.309702                                             | 0.862749368                             | 0.011408405                                           | 4.578578614                          |
| 427.6751608                                            | 0.88576779                              | 0.007263855                                           | 4.652304212                          |
| 769.7773346                                            | 0.896262142                             | 0.005021535                                           | 4.713554691                          |
| 589.806753                                             | 0.879645607                             | 0.005019662                                           | 4.750372158                          |
| 257.3254279                                            | 0.886660175                             | 0.012643193                                           | 4.348042284                          |
| 767.9212201                                            | 0.854758395                             | 0.004859725                                           | 4.719078796                          |
| 329.5492036                                            | 0.813178386                             | 0.017063766                                           | 4.254880114                          |
| 662.1528754                                            | 0.88432                                 | 0.004758788                                           | 4.805840561                          |
| 667.5258292                                            | 0.8901643                               | 0.004124005                                           | 4.687947301                          |
| 329.4641521                                            | 0.851356373                             | 0.011711128                                           | 4.416791774                          |
| 534.6181693                                            | 0.876176941                             | 0.0076188                                             | 4.589335866                          |
| 636.5901981                                            | 0.878536848                             | 0.005267619                                           | 4.795554556                          |
| 755.4004963                                            | 0.884024707                             | 0.004252192                                           | 4.607992756                          |
| 417.1961739                                            | 0.911499302                             | 0.007990924                                           | 4.706005741                          |
| 336.9136025                                            | 0.902587033                             | 0.010988701                                           | 4.827393405                          |
| 470.3773212                                            | 0.872692881                             | 0.007632598                                           | 4.453326999                          |
| 254.5321395                                            | 0.856780532                             | 0.016607301                                           | 4.398749145                          |
| 244.0754659                                            | 0.854906054                             | 0.017835353                                           | 4.573345122                          |
| 268.9874618                                            | 0.875760443                             | 0.012269526                                           | 4.423542416                          |
| 757.3772373                                            | 0.910053606                             | 0.004667421                                           | 4.864511089                          |
| 725.4248832                                            | 0.915496771                             | 0.005214516                                           | 4.918701952                          |
| 415.4711516                                            | 0.866378757                             | 0.011658435                                           | 4.509196247                          |
| 579.2558724                                            | 0.884650681                             | 0.005339217                                           | 4.694923138                          |
| 425.4629538                                            | 0.871786528                             | 0.008154638                                           | 4.504867859                          |
| 481.1968645                                            | 0.900337465                             | 0.0080584                                             | 4.860590803                          |
| 255.0664232                                            | 0.829182567                             | 0.017357041                                           | 4.415696449                          |
| 540.4397275                                            | 0.893565554                             | 0.007128713                                           | 4.780674349                          |
| 513.1307724                                            | 0.881697806                             | 0.006006503                                           | 4.676343347                          |
| 281.6134844                                            | 0.879045818                             | 0.012803754                                           | 4.498550664                          |
| 415.7599628                                            | 0.867882241                             | 0.010565712                                           | 4.640827789                          |
| 161.3481336                                            | 0.816304861                             | 0.037675687                                           | 4.392581665                          |
| 290.9070897                                            | 0.908351095                             | 0.015137094                                           | 4.739752093                          |
| 712.1697814                                            | 0.885676546                             | 0.004239571                                           | 4.652976326                          |
| 518.0218749                                            | 0.885594406                             | 0.005567159                                           | 4.579104602                          |
| 363.338625                                             | 0.891261312                             | 0.008160106                                           | 4.541866395                          |
| 907.6433079                                            | 0.874230095                             | 0.004042094                                           | 4.864433525                          |
| 278.5610887                                            | 0.886895497                             | 0.019007694                                           | 4.774316959                          |
| 728.5987607                                            | 0.838806847                             | 0.009144544                                           | 4.566344878                          |
| 208.0088333                                            | 0.845508209                             | 0.021410619                                           | 4.20285206                           |
| 338.6598116                                            | 0.87867363                              | 0.010058898                                           | 4.58211633                           |

| log.sigma.4.0.mm.3D_glrIm_HighGrayLevelRunEmphasis | log.sigma.4.0.mm.3D_glrIm_RunLengthNonUniformityNormalized | log.sigma.4.0.mm.3D_glszm_GrayLevelVariance |
|----------------------------------------------------|------------------------------------------------------------|---------------------------------------------|
| 545.7273168                                        | 0.84915961                                                 | 43.84493408                                 |
| 78.32468911                                        | 0.763999314                                                | 15.63724641                                 |
| 193.9048661                                        | 0.796014682                                                | 23.17829658                                 |
| 301.0815873                                        | 0.832369603                                                | 31.39878593                                 |
| 249.3294381                                        | 0.800906544                                                | 21.75074971                                 |
| 149.0521925                                        | 0.795767799                                                | 21.41247215                                 |
| 263.8788417                                        | 0.809843884                                                | 26.04375709                                 |
| 494.1727227                                        | 0.799873105                                                | 36.12154516                                 |
| 412.5707384                                        | 0.806362002                                                | 27.77538001                                 |
| 608.2014417                                        | 0.821509684                                                | 29.70355847                                 |
| 146.6484024                                        | 0.795737182                                                | 16.52676735                                 |
| 314.5105534                                        | 0.81081001                                                 | 25.71305931                                 |
| 275.7225202                                        | 0.727067739                                                | 31.91                                       |
| 376.0617574                                        | 0.793420075                                                | 38.13270876                                 |
| 299.8058008                                        | 0.82591392                                                 | 31.79213597                                 |
| 293.1136938                                        | 0.830328422                                                | 27.69578053                                 |
| 310.0460353                                        | 0.814963913                                                | 23.03193783                                 |
| 109.3264803                                        | 0.747217172                                                | 19.90779163                                 |
| 81.55459057                                        | 0.760776373                                                | 11.2177113                                  |
| 250.9680791                                        | 0.819722831                                                | 31.19876899                                 |
| 158.239407                                         | 0.735783924                                                | 18.52224171                                 |
| 112.8651854                                        | 0.802598285                                                | 15.35011574                                 |
| 140.9293573                                        | 0.781541272                                                | 20.78384198                                 |
| 210.6670607                                        | 0.787241723                                                | 21.69039593                                 |
| 367.5683791                                        | 0.832451028                                                | 27.61747231                                 |
| 493.1763019                                        | 0.837898832                                                | 38.27643297                                 |
| 565.2562796                                        | 0.825376964                                                | 42.04871605                                 |
| 290.0830101                                        | 0.789842246                                                | 22.20920208                                 |
| 94.96179628                                        | 0.773262679                                                | 12.46864149                                 |
| 244.5070337                                        | 0.755601786                                                | 20.16791104                                 |
| 445.2630148                                        | 0.793503199                                                | 27.68876091                                 |
| 364.7113373                                        | 0.736725379                                                | 26.73164436                                 |
| 385.169671                                         | 0.827820605                                                | 35.74093333                                 |
| 420.8630917                                        | 0.828473143                                                | 33.40725011                                 |
| 351.2248543                                        | 0.820529553                                                | 21.89788401                                 |
| 403.7917061                                        | 0.789518397                                                | 26.28115284                                 |
| 572.0533429                                        | 0.753341683                                                | 41.14846603                                 |
| 557.5473559                                        | 0.781983626                                                | 41.05557803                                 |
| 85.32144163                                        | 0.734439786                                                | 9.372532895                                 |
| 258.1841944                                        | 0.833185337                                                | 32.20694897                                 |
| 422.8366892                                        | 0.78180012                                                 | 32.22668651                                 |
| 348.597522                                         | 0.848131565                                                | 33.65429954                                 |
| 342.8217082                                        | 0.835176936                                                | 26.4674922                                  |
| 280.6794683                                        | 0.807243789                                                | 26.97559834                                 |
| 152.3644883                                        | 0.786557914                                                | 21.21856124                                 |
| 356.0929594                                        | 0.820383078                                                | 29.56375293                                 |
| 325.2042028                                        | 0.797436658                                                | 26.03184977                                 |
| 72.58464111                                        | 0.751509879                                                | 11.79825061                                 |
| 183.9665366                                        | 0.808968127                                                | 22.99498428                                 |
| 107.9652357                                        | 0.767507408                                                | 17.2031611                                  |
| 293.1184066                                        | 0.822689203                                                | 26.59799016                                 |
| 313.7023282                                        | 0.844892643                                                | 28.25047518                                 |
| 229.9699299                                        | 0.790829161                                                | 23.27336857                                 |
| 183.1217472                                        | 0.82866419                                                 | 21.90880749                                 |
| 149.963367                                         | 0.8169773                                                  | 21.47228441                                 |
| 444.0403246                                        | 0.791119842                                                | 25.2000314                                  |
| 329.8315729                                        | 0.829579995                                                | 29.49714239                                 |
| 435.3140972                                        | 0.787485374                                                | 35.97340828                                 |
| 253.2014728                                        | 0.79008439                                                 | 22.32266736                                 |
| 463.2800791                                        | 0.786274176                                                | 28.11074555                                 |
| 209.8450633                                        | 0.772010313                                                | 27.20000863                                 |
| 299.7433569                                        | 0.802436878                                                | 23.72994811                                 |
| 556.7812058                                        | 0.820627723                                                | 28.37128069                                 |
| 412.3688293                                        | 0.794071577                                                | 30.36435534                                 |
| 177.2893429                                        | 0.80470449                                                 | 18.77190373                                 |
| 488.0078609                                        | 0.763714277                                                | 36.55515228                                 |
| 180.8154702                                        | 0.691743798                                                | 16.82122449                                 |
| 459.25106                                          | 0.800998869                                                | 35.2363583                                  |
| 460.8420175                                        | 0.812365997                                                | 29.15024549                                 |
| 208.1431196                                        | 0.751935157                                                | 16.34980297                                 |
| 358.207713                                         | 0.78579402                                                 | 29.30175187                                 |
| 437.2114885                                        | 0.796796585                                                | 33.41007291                                 |
| 513.3736663                                        | 0.803105621                                                | 33.76135707                                 |
| 310.4074125                                        | 0.842020967                                                | 29.77846559                                 |
| 251.8019067                                        | 0.82888357                                                 | 30.58342075                                 |
| 306.3083857                                        | 0.779973845                                                | 24.16790205                                 |
| 161.202122                                         | 0.762527756                                                | 17.08472048                                 |
| 162.8842574                                        | 0.75704229                                                 | 27.18647059                                 |
| 184.86569                                          | 0.784353355                                                | 18.73603025                                 |
| 555.0450666                                        | 0.840331571                                                | 43.18357101                                 |
| 544.2956134                                        | 0.850730461                                                | 44.97455932                                 |
| 268.2927964                                        | 0.773412055                                                | 30.22967516                                 |
| 394.762851                                         | 0.809154745                                                | 32.394727                                   |
| 279.9583822                                        | 0.77593355                                                 | 22.36175323                                 |
| 343.8510321                                        | 0.828480819                                                | 33.83667414                                 |
| 153.078155                                         | 0.721698047                                                | 18.169375                                   |
| 376.2496746                                        | 0.816393201                                                | 34.62416468                                 |
| 356.5126635                                        | 0.805627723                                                | 26.88532324                                 |
| 191.8621631                                        | 0.793915578                                                | 20.08809584                                 |
| 270.5643162                                        | 0.777791442                                                | 28.14787001                                 |
| 102.3426968                                        | 0.703604431                                                | 13.68199881                                 |
| 217.177081                                         | 0.8372156                                                  | 27.19616507                                 |
| 490.1097093                                        | 0.80034848                                                 | 29.88953269                                 |
| 357.7456775                                        | 0.806677163                                                | 25.09291103                                 |
| 255.3259952                                        | 0.807688153                                                | 21.52304138                                 |
| 602.5061257                                        | 0.794132494                                                | 39.17827627                                 |
| 197.4387059                                        | 0.801643367                                                | 28.01565978                                 |
| 417.0421337                                        | 0.730691808                                                | 31.35949118                                 |
| 123.8734416                                        | 0.7324276                                                  | 12.03473744                                 |
| 233.6464879                                        | 0.798203735                                                | 22.22407356                                 |

| log.sigma.4.0.mm.3D_glszm_SmallAreaHighGrayLevelEmphasis | log.sigma.4.0.mm.3D_glszm_GrayLevelNonUniformityNormalized | log.sigma.4.0.mm.3D_glszm_SizeZoneNonUniformityNormalized |
|----------------------------------------------------------|------------------------------------------------------------|-----------------------------------------------------------|
| 280.4400416                                              | 0.043788784                                                | 0.339615088                                               |
| 42.748785                                                | 0.073280891                                                | 0.211562347                                               |
| 97.07398738                                              | 0.059007215                                                | 0.294777395                                               |
| 178.6863054                                              | 0.051352354                                                | 0.301445146                                               |
| 127.2864956                                              | 0.06133829                                                 | 0.287178176                                               |
| 107.1259586                                              | 0.061383963                                                | 0.315283416                                               |
| 153.4370785                                              | 0.055939759                                                | 0.295580667                                               |
| 292.9871468                                              | 0.047602625                                                | 0.309518571                                               |
| 201.3420972                                              | 0.054268589                                                | 0.265907486                                               |
| 339.0885233                                              | 0.058262262                                                | 0.32736442                                                |
| 70.9556937                                               | 0.068783673                                                | 0.263085714                                               |
| 173.8671902                                              | 0.057392634                                                | 0.286359374                                               |
| 146.0456259                                              | 0.052933673                                                | 0.270765306                                               |
| 203.6161803                                              | 0.04632143                                                 | 0.293564481                                               |
| 154.5502844                                              | 0.051345458                                                | 0.320511744                                               |
| 157.5943366                                              | 0.054047704                                                | 0.276443574                                               |
| 136.6957434                                              | 0.064396193                                                | 0.255707168                                               |
| 63.69060947                                              | 0.063008346                                                | 0.252351929                                               |
| 40.22602921                                              | 0.084228212                                                | 0.232851194                                               |
| 153.5897562                                              | 0.050112722                                                | 0.287535107                                               |
| 90.89219729                                              | 0.067891024                                                | 0.274832589                                               |
| 53.22634703                                              | 0.073045267                                                | 0.240483539                                               |
| 63.79510223                                              | 0.063736046                                                | 0.243979109                                               |
| 113.5030396                                              | 0.061347082                                                | 0.291834226                                               |
| 195.8448129                                              | 0.054492601                                                | 0.334834975                                               |
| 294.163054                                               | 0.047967051                                                | 0.333111204                                               |
| 325.4992779                                              | 0.046338654                                                | 0.314274172                                               |
| 138.9195287                                              | 0.060301605                                                | 0.258047458                                               |
| 57.01413754                                              | 0.080078125                                                | 0.249348958                                               |
| 121.3179104                                              | 0.063990233                                                | 0.237831059                                               |
| 255.0654035                                              | 0.054098618                                                | 0.333039898                                               |
| 150.1550623                                              | 0.063752583                                                | 0.26074311                                                |
| 201.9095352                                              | 0.046617284                                                | 0.295935802                                               |
| 230.4288846                                              | 0.050431523                                                | 0.323483161                                               |
| 201.2701052                                              | 0.060150411                                                | 0.320166789                                               |
| 216.1390891                                              | 0.056761852                                                | 0.307070884                                               |
| 323.4666867                                              | 0.047678309                                                | 0.328477126                                               |
| 308.5331239                                              | 0.045581463                                                | 0.297605332                                               |
| 28.59297534                                              | 0.096520083                                                | 0.178064404                                               |
| 146.1406833                                              | 0.048854376                                                | 0.288004562                                               |
| 205.5232715                                              | 0.051953951                                                | 0.321945336                                               |
| 210.8787159                                              | 0.050235956                                                | 0.313438684                                               |
| 172.0397174                                              | 0.054507228                                                | 0.287251405                                               |
| 142.8455462                                              | 0.057122789                                                | 0.291758585                                               |
| 100.6383033                                              | 0.06216409                                                 | 0.291058264                                               |
| 201.4527614                                              | 0.052590894                                                | 0.338967765                                               |
| 180.4192387                                              | 0.055203889                                                | 0.278241649                                               |
| 40.71876859                                              | 0.083898349                                                | 0.241861187                                               |
| 95.26129174                                              | 0.058848003                                                | 0.259245562                                               |
| 61.07050811                                              | 0.073802773                                                | 0.2613159                                                 |
| 150.5045811                                              | 0.055683545                                                | 0.301525961                                               |
| 174.700345                                               | 0.052877129                                                | 0.298414962                                               |
| 124.2825835                                              | 0.058219592                                                | 0.289069822                                               |
| 99.91833519                                              | 0.061048192                                                | 0.300615583                                               |
| 81.39073316                                              | 0.060509873                                                | 0.254736209                                               |
| 228.1558928                                              | 0.058745037                                                | 0.261556374                                               |
| 172.9318765                                              | 0.051322655                                                | 0.295402089                                               |
| 189.0866602                                              | 0.048491072                                                | 0.259465807                                               |
| 126.6831076                                              | 0.06019482                                                 | 0.294629437                                               |
| 247.5076884                                              | 0.054241478                                                | 0.293534495                                               |
| 143.879339                                               | 0.054474624                                                | 0.31252291                                                |
| 169.4181022                                              | 0.059909985                                                | 0.291029962                                               |
| 318.4614032                                              | 0.054649145                                                | 0.32423941                                                |
| 245.0142084                                              | 0.050942693                                                | 0.258433954                                               |
| 94.93016713                                              | 0.066590049                                                | 0.265481341                                               |
| 276.6370588                                              | 0.049443298                                                | 0.277184798                                               |
| 59.38094722                                              | 0.07744898                                                 | 0.183469388                                               |
| 252.6086181                                              | 0.047762387                                                | 0.284278098                                               |
| 236.6744627                                              | 0.052216926                                                | 0.330317141                                               |
| 100.6821674                                              | 0.070744892                                                | 0.236204147                                               |
| 179.9601754                                              | 0.057533781                                                | 0.298255412                                               |
| 242.767693                                               | 0.050129764                                                | 0.305395168                                               |
| 242.3882394                                              | 0.052961225                                                | 0.290937399                                               |
| 156.1960465                                              | 0.051257425                                                | 0.300527021                                               |
| 162.461843                                               | 0.052010222                                                | 0.297620333                                               |
| 125.8881956                                              | 0.06004879                                                 | 0.26001595                                                |
| 79.4346372                                               | 0.067751153                                                | 0.276099798                                               |
| 103.4468513                                              | 0.056401384                                                | 0.229273356                                               |
| 102.0196221                                              | 0.064499055                                                | 0.244494854                                               |
| 287.32025                                                | 0.045740929                                                | 0.329527359                                               |
| 286.5881207                                              | 0.044011696                                                | 0.349783822                                               |
| 164.3907863                                              | 0.053992629                                                | 0.346255717                                               |
| 216.9945466                                              | 0.049651276                                                | 0.291419062                                               |
| 126.824328                                               | 0.060399446                                                | 0.240819072                                               |
| 178.776246                                               | 0.049381149                                                | 0.278955569                                               |
| 83.42326744                                              | 0.073984375                                                | 0.236328125                                               |
| 192.1768231                                              | 0.049290947                                                | 0.317115056                                               |
| 212.5798688                                              | 0.055793532                                                | 0.328785593                                               |
| 101.3150967                                              | 0.063827399                                                | 0.285825174                                               |
| 130.1660692                                              | 0.053256458                                                | 0.273514713                                               |
| 57.0511532                                               | 0.078548483                                                | 0.24297442                                                |
| 115.925639                                               | 0.053637272                                                | 0.303064063                                               |
| 240.8093687                                              | 0.052755774                                                | 0.295799789                                               |
| 190.7909412                                              | 0.056739857                                                | 0.319653756                                               |
| 122.4167808                                              | 0.060226193                                                | 0.244640717                                               |
| 355.0313628                                              | 0.047706399                                                | 0.356949801                                               |
| 97.73481756                                              | 0.052398743                                                | 0.220142951                                               |
| 173.9755288                                              | 0.054435785                                                | 0.276060796                                               |
| 35.54639516                                              | 0.08465222                                                 | 0.173119065                                               |
| 130.6929733                                              | 0.059593748                                                | 0.30721681                                                |

| log.sigma.4.0.mm.3D_glszm_SizeZoneNonUniformity | log.sigma.4.0.mm.3D_glszm_GrayLevelNonUniformity | log.sigma.4.0.mm.3D_glszm_LargeAreaEmphasis | log.sigma.4.0.mm.3D_glszm_ZoneVariance |
|-------------------------------------------------|--------------------------------------------------|---------------------------------------------|----------------------------------------|
| 254.0320856                                     | 32.7540107                                       | 41.33957219                                 | 33.29157968                            |
| 34.48466258                                     | 11.94478528                                      | 249.6503067                                 | 216.7463585                            |
| 96.98176292                                     | 19.41337386                                      | 110.8510638                                 | 89.11109469                            |
| 87.11764706                                     | 14.84083045                                      | 48.64013841                                 | 37.21152764                            |
| 154.5018587                                     | 33                                               | 156.3791822                                 | 137.0060944                            |
| 57.06629834                                     | 11.11049724                                      | 100.2762431                                 | 86.97994567                            |
| 397.2604167                                     | 75.18303571                                      | 193.2462798                                 | 175.5675085                            |
| 335.8276498                                     | 51.64884793                                      | 487.3456221                                 | 465.1819202                            |
| 285.3187325                                     | 58.23019571                                      | 111.6067102                                 | 93.65691822                            |
| 99.19141914                                     | 17.65346535                                      | 65.39273927                                 | 52.87562222                            |
| 92.08                                           | 24.07428571                                      | 105.48                                      | 86.91621224                            |
| 159.7885305                                     | 32.02508961                                      | 107.109319                                  | 90.045609                              |
| 75.81428571                                     | 14.82142857                                      | 652.8107143                                 | 608.3503954                            |
| 121.2421308                                     | 19.13075061                                      | 157.7602906                                 | 140.4764406                            |
| 181.7301587                                     | 29.11287478                                      | 94.16931217                                 | 81.92548423                            |
| 293.0301887                                     | 57.29056604                                      | 125.1188679                                 | 108.0759915                            |
| 83.87195122                                     | 12.12195122                                      | 45.75609756                                 | 32.50472189                            |
| 54.76036866                                     | 13.67281106                                      | 284.0599078                                 | 251.7744696                            |
| 54.48717949                                     | 19.70940171                                      | 269.965812                                  | 239.1965081                            |
| 384.7219731                                     | 67.05082212                                      | 88.33557549                                 | 73.23729782                            |
| 123.125                                         | 30.41517857                                      | 968.2946429                                 | 922.7321429                            |
| 51.94444444                                     | 15.77777778                                      | 122.4398148                                 | 97.48608968                            |
| 49.039801                                       | 12.81094527                                      | 199.5621891                                 | 173.60798                              |
| 179.4780488                                     | 37.72845528                                      | 155.2569106                                 | 136.7319347                            |
| 114.8483965                                     | 18.6909621                                       | 64.49271137                                 | 50.71844215                            |
| 244.8367347                                     | 35.25578231                                      | 90.6952381                                  | 80.30667592                            |
| 269.0186916                                     | 39.66588785                                      | 125.2978972                                 | 111.0331566                            |
| 155.0865225                                     | 36.24126456                                      | 293.6173045                                 | 272.4970861                            |
| 23.9375                                         | 7.6875                                           | 101.5520833                                 | 79.87141927                            |
| 82.52737752                                     | 22.20461095                                      | 233.2910663                                 | 198.2528549                            |
| 336.370297                                      | 54.63960396                                      | 385.0574257                                 | 362.8649309                            |
| 85.26299694                                     | 20.8470948                                       | 858.8776758                                 | 818.8439993                            |
| 266.3422222                                     | 41.95555556                                      | 73.39                                       | 80.51785062                            |
| 219.6450663                                     | 34.24300442                                      | 75.39911635                                 | 63.42078904                            |
| 365.6304729                                     | 68.69176883                                      | 87.97197898                                 | 73.10021746                            |
| 173.8021201                                     | 32.12720848                                      | 331.5106007                                 | 303.435581                             |
| 218.7657658                                     | 31.75375375                                      | 1041.656156                                 | 1010.440614                            |
| 338.6748682                                     | 51.87170475                                      | 350.7214411                                 | 330.1538612                            |
| 27.06578947                                     | 14.67105263                                      | 360.2631579                                 | 294.7809903                            |
| 584.6492611                                     | 99.17438424                                      | 59.52019704                                 | 46.69462496                            |
| 181.899115                                      | 29.3539823                                       | 378.2300885                                 | 357.1514261                            |
| 401.8283931                                     | 64.4024961                                       | 31.97893916                                 | 22.8803869                             |
| 289.2621648                                     | 54.88877855                                      | 61.65938431                                 | 48.49985356                            |
| 180.8903226                                     | 35.41612903                                      | 128.983871                                  | 112.8804787                            |
| 84.40689655                                     | 18.02758621                                      | 129.2689655                                 | 109.8482283                            |
| 267.106599                                      | 41.44162437                                      | 83.41751269                                 | 71.28272276                            |
| 291.3190067                                     | 57.79847182                                      | 179.3543457                                 | 160.3690574                            |
| 33.61870504                                     | 11.6618705                                       | 289.6906475                                 | 250.4255473                            |
| 53.92307692                                     | 12.24038462                                      | 79.11057692                                 | 62.37146357                            |
| 72.12318841                                     | 20.36956522                                      | 209.0942029                                 | 185.0984037                            |
| 209.862069                                      | 38.75574713                                      | 65.59913793                                 | 51.97497812                            |
| 326.7643836                                     | 57.90045662                                      | 30.33150685                                 | 20.85410563                            |
| 281.8430769                                     | 56.76410256                                      | 324.2605128                                 | 302.8449767                            |
| 89.28282828                                     | 18.13131313                                      | 82.2020202                                  | 68.38465463                            |
| 88.13872832                                     | 20.93641618                                      | 70.90751445                                 | 56.13171172                            |
| 102.2685422                                     | 22.96930946                                      | 232.056266                                  | 207.1839797                            |
| 347.3928571                                     | 60.35544218                                      | 52.30527211                                 | 40.47424612                            |
| 165.539185                                      | 30.93730408                                      | 335.2413793                                 | 305.8642997                            |
| 109.6021505                                     | 22.39247312                                      | 148.2741935                                 | 128.6483408                            |
| 589.7108014                                     | 108.9711299                                      | 233.4449975                                 | 212.796591                             |
| 116.5710456                                     | 20.31903485                                      | 247.077748                                  | 224.6614581                            |
| 185.677116                                      | 38.22257053                                      | 131.7335423                                 | 114.2197109                            |
| 504.192283                                      | 84.97942122                                      | 96.53569132                                 | 82.67623122                            |
| 418.4045707                                     | 82.47621989                                      | 245.7720815                                 | 223.602467                             |
| 45.6627907                                      | 11.45348837                                      | 98.23255814                                 | 77.13669551                            |
| 200.1274238                                     | 35.69806094                                      | 690.7977839                                 | 662.185657                             |
| 25.68571429                                     | 10.84285714                                      | 954.5428571                                 | 867.7869388                            |
| 427.8385382                                     | 71.88239203                                      | 182.5408638                                 | 165.2949173                            |
| 516.9463259                                     | 81.71948882                                      | 131.4319489                                 | 117.4257024                            |
| 107.9452954                                     | 32.33041575                                      | 393.6323851                                 | 353.4195807                            |
| 85.59930314                                     | 16.51219512                                      | 170.5191638                                 | 150.0332892                            |
| 281.87974                                       | 46.26977248                                      | 260.7757313                                 | 239.1728747                            |
| 154.4877589                                     | 28.12241055                                      | 114.9435028                                 | 96.52307943                            |
| 211.5710227                                     | 36.08522727                                      | 67.83664773                                 | 57.54020653                            |
| 262.5011338                                     | 45.87301587                                      | 88.91043084                                 | 76.30873581                            |
| 75.92465753                                     | 17.53424658                                      | 121.2534247                                 | 100.131216                             |
| 117.8946136                                     | 28.92974239                                      | 269.9016393                                 | 238.4156113                            |
| 38.97647059                                     | 9.588235294                                      | 270.6588235                                 | 238.9022837                            |
| 84.35072464                                     | 22.25217391                                      | 197.1507246                                 | 172.6697417                            |
| 234.2939522                                     | 32.52180028                                      | 60.46554149                                 | 49.64319979                            |
| 256.3915416                                     | 32.26057299                                      | 39.7994543                                  | 32.43633873                            |
| 145.0811456                                     | 22.62291169                                      | 218.5417661                                 | 200.1071422                            |
| 198.7478006                                     | 33.86217009                                      | 217.755132                                  | 194.7798372                            |
| 125.9483748                                     | 31.58891013                                      | 267.6347992                                 | 233.1107488                            |
| 188.5739645                                     | 33.3816568                                       | 61.60502959                                 | 48.58745098                            |
| 37.8125                                         | 11.8375                                          | 1033.725                                    | 942.044375                             |
| 211.5157421                                     | 32.87706147                                      | 133.2218891                                 | 120.4361717                            |
| 229.1635581                                     | 38.88809182                                      | 255.6212339                                 | 240.1448553                            |
| 93.4648318                                      | 20.87155963                                      | 98.04281346                                 | 77.99870942                            |
| 118.4318707                                     | 23.06004619                                      | 174.6120092                                 | 152.7407261                            |
| 49.8097561                                      | 16.10243902                                      | 628.6926829                                 | 588.2306722                            |
| 226.0857909                                     | 40.01340483                                      | 34.71581769                                 | 24.52038037                            |
| 375.0741325                                     | 66.89432177                                      | 176.7563091                                 | 160.0483305                            |
| 261.4767726                                     | 46.41320293                                      | 201.4987775                                 | 185.2237672                            |
| 242.4389506                                     | 59.68415742                                      | 113.2068618                                 | 93.92138123                            |
| 302.3364817                                     | 40.40731995                                      | 306.1723731                                 | 289.8496283                            |
| 131.6454849                                     | 31.33444816                                      | 148.0016722                                 | 125.8109557                            |
| 50.51912568                                     | 9.961748634                                      | 338.3224044                                 | 305.5889994                            |
| 19.21621622                                     | 9.396396396                                      | 291.0990991                                 | 234.6462138                            |
| 380.3344103                                     | 73.77705977                                      | 206.6090468                                 | 184.856392                             |

| log.sigma.4.0.mm.3D_glszm_ZonePercentage | log.sigma.4.0.mm.3D_glszm_LargeAreaLowGrayLevelEmphasis | log.sigma.4.0.mm.3D_glszm_LargeAreaHighGrayLevelEmphasis | log.sigma.4.0.mm.3D_glszm_HighGrayLevelZoneEmphasis |
|------------------------------------------|---------------------------------------------------------|----------------------------------------------------------|-----------------------------------------------------|
| 0.352497644                              | 0.084268941                                             | 23234.18583                                              | 501.3930481                                         |
| 0.174331551                              | 5.202996994                                             | 13999.8589                                               | 89.72392638                                         |
| 0.214471969                              | 0.821534461                                             | 20089.55015                                              | 190.5227964                                         |
| 0.29580348                               | 0.239476879                                             | 14450.91349                                              | 303.7058824                                         |
| 0.227195946                              | 0.763917043                                             | 34506.84015                                              | 243.0855019                                         |
| 0.274242424                              | 1.314014991                                             | 8994.895028                                              | 181.2044199                                         |
| 0.237834012                              | 1.08901114                                              | 37914.95685                                              | 282.9970238                                         |
| 0.212411903                              | 1.214177885                                             | 200527.1668                                              | 522.0700461                                         |
| 0.236031676                              | 0.327881352                                             | 41698.73719                                              | 400.9888164                                         |
| 0.282649254                              | 0.127920103                                             | 36673.93069                                              | 599.0693069                                         |
| 0.232095491                              | 0.937650232                                             | 14449.32571                                              | 143.1857143                                         |
| 0.24208243                               | 0.435039022                                             | 30294.20968                                              | 318.5645161                                         |
| 0.149973219                              | 2.816354378                                             | 156754.1286                                              | 281.55                                              |
| 0.240535818                              | 0.524531515                                             | 51340.08959                                              | 379.1743341                                         |
| 0.28578629                               | 0.347222393                                             | 28257.24339                                              | 278.675485                                          |
| 0.242230347                              | 0.639505215                                             | 28809.55377                                              | 302.7235849                                         |
| 0.274706868                              | 0.165941441                                             | 15145.16159                                              | 282.3597561                                         |
| 0.175993512                              | 4.328021482                                             | 21081.15668                                              | 130.8847926                                         |
| 0.18027735                               | 6.033954522                                             | 14545.00427                                              | 87.29487179                                         |
| 0.257357184                              | 0.536786377                                             | 17565.59417                                              | 273.2593423                                         |
| 0.148148148                              | 8.601154487                                             | 115832.4688                                              | 174.5491071                                         |
| 0.200185357                              | 1.866885076                                             | 10634.90741                                              | 117.8657407                                         |
| 0.196289063                              | 2.126666216                                             | 22105.56219                                              | 145.7562189                                         |
| 0.232338496                              | 0.906396811                                             | 28745.3252                                               | 214.0650407                                         |
| 0.269442262                              | 0.209973387                                             | 21836.06414                                              | 358.1574344                                         |
| 0.310257493                              | 0.213659637                                             | 42148.4585                                               | 499.3278912                                         |
| 0.264769564                              | 0.260161823                                             | 65842.19977                                              | 570.1892523                                         |
| 0.217595945                              | 1.272255716                                             | 70745.63894                                              | 288.6971714                                         |
| 0.214765101                              | 2.299993726                                             | 5802.1875                                                | 112.6770833                                         |
| 0.168938656                              | 1.05249946                                              | 55211.55043                                              | 248.2910663                                         |
| 0.212274065                              | 1.054867778                                             | 145678.8693                                              | 445.1019802                                         |
| 0.158047366                              | 2.296594504                                             | 326144.8777                                              | 312.6207951                                         |
| 0.278724063                              | 0.207906591                                             | 30947.32667                                              | 366.2533333                                         |
| 0.28893617                               | 0.212189527                                             | 30084.99411                                              | 400.8718704                                         |
| 0.259309718                              | 0.320283891                                             | 28038.46935                                              | 352.5516637                                         |
| 0.188729577                              | 1.016307989                                             | 114239.3869                                              | 395.45053                                           |
| 0.178984144                              | 1.924031862                                             | 569870.2252                                              | 555.539039                                          |
| 0.220499903                              | 0.819748168                                             | 157180.862                                               | 561.6010545                                         |
| 0.123577236                              | 4.550515237                                             | 32268.23026                                              | 75.38815789                                         |
| 0.279229711                              | 0.369905545                                             | 14092.95468                                              | 264.1763547                                         |
| 0.217810332                              | 0.839757884                                             | 175635.0053                                              | 368.0566372                                         |
| 0.331523145                              | 0.122308974                                             | 10636.24259                                              | 361.173947                                          |
| 0.275663838                              | 0.229427359                                             | 19373.76564                                              | 331.6236346                                         |
| 0.249196141                              | 0.4874054                                               | 37239.05                                                 | 262.2516129                                         |
| 0.226917058                              | 1.361057256                                             | 14254.73103                                              | 179.0241379                                         |
| 0.287067395                              | 0.338106831                                             | 24985.48604                                              | 350.273096                                          |
| 0.229504603                              | 0.694727199                                             | 49027.95989                                              | 341.4250239                                         |
| 0.159586682                              | 8.132410828                                             | 13005.61151                                              | 85.381295                                           |
| 0.244418331                              | 0.644794275                                             | 11994.63942                                              | 192.3701923                                         |
| 0.204142012                              | 4.059027608                                             | 12783.00362                                              | 126.2391304                                         |
| 0.270922538                              | 0.316336467                                             | 20240.44684                                              | 276.4741379                                         |
| 0.324829427                              | 0.124674894                                             | 9181.651142                                              | 314.4009132                                         |
| 0.216090426                              | 1.758084849                                             | 63339.15385                                              | 233.9548718                                         |
| 0.269021739                              | 0.690110912                                             | 11574.13805                                              | 190.4713805                                         |
| 0.260150376                              | 1.03058854                                              | 7127.367052                                              | 160.9306358                                         |
| 0.200512821                              | 0.56081566                                              | 100005.1816                                              | 443.9309463                                         |
| 0.290729295                              | 0.196846102                                             | 16604.07738                                              | 319.6547619                                         |
| 0.184499711                              | 0.812565246                                             | 146624.884                                               | 390.4514107                                         |
| 0.225728155                              | 0.645074126                                             | 35997.24731                                              | 239.172043                                          |
| 0.220067915                              | 0.614155692                                             | 95023.10602                                              | 453.0164261                                         |
| 0.211211778                              | 1.652962898                                             | 39031.74531                                              | 246.7640751                                         |
| 0.238951311                              | 0.602578515                                             | 32208.3558                                               | 308.6410658                                         |
| 0.268612887                              | 0.234650973                                             | 48210.42251                                              | 558.318328                                          |
| 0.212383576                              | 0.768504417                                             | 82783.18592                                              | 465.4694256                                         |
| 0.217721519                              | 0.756011378                                             | 14799.51163                                              | 183.2674419                                         |
| 0.186949767                              | 1.707346557                                             | 284390.6053                                              | 516.1772853                                         |
| 0.107361963                              | 5.999127652                                             | 159116.3571                                              | 162.8857143                                         |
| 0.2408                                   | 0.444273908                                             | 79348.5515                                               | 465.0863787                                         |
| 0.267201639                              | 0.312073839                                             | 58075.50607                                              | 420.5073482                                         |
| 0.157694962                              | 2.484942554                                             | 67579.16193                                              | 212.8402626                                         |
| 0.220939184                              | 0.554362211                                             | 56883.06272                                              | 339.7735192                                         |
| 0.215151515                              | 0.768350239                                             | 93907.30011                                              | 444.0541712                                         |
| 0.232996928                              | 0.252493953                                             | 55499.2806                                               | 477.7721281                                         |
| 0.31164232                               | 0.224920686                                             | 23752.75852                                              | 290.6193182                                         |
| 0.281699138                              | 0.527000661                                             | 18734.43197                                              | 277.1303855                                         |
| 0.217585693                              | 0.413686209                                             | 38114.36644                                              | 266.9726027                                         |
| 0.178213689                              | 2.194378908                                             | 37709.84075                                              | 156.9555035                                         |
| 0.177453027                              | 2.656318534                                             | 30203.73529                                              | 204.0764706                                         |
| 0.202108963                              | 1.415407021                                             | 29738.49565                                              | 200.1652174                                         |
| 0.303976058                              | 0.115233573                                             | 38586.57947                                              | 500.8185654                                         |
| 0.368526898                              | 0.084351035                                             | 22340.2292                                               | 501.1145975                                         |
| 0.232907171                              | 0.880827214                                             | 59425.1957                                               | 267.2720764                                         |
| 0.208626491                              | 0.650736063                                             | 77552.82258                                              | 395.3475073                                         |
| 0.170191995                              | 1.028130797                                             | 76892.76291                                              | 260.9254302                                         |
| 0.277162772                              | 0.236552696                                             | 20446.59172                                              | 337.6065089                                         |
| 0.104438642                              | 9.502936349                                             | 122032.95                                                | 172.55                                              |
| 0.27966457                               | 0.37560595                                              | 51627.9955                                               | 344.3208396                                         |
| 0.254194019                              | 0.948383505                                             | 71610.5911                                               | 375.615495                                          |
| 0.223360656                              | 0.691422996                                             | 16243.68502                                              | 192.6850153                                         |
| 0.21382716                               | 0.776814515                                             | 43064.32102                                              | 258.1639723                                         |
| 0.157208589                              | 14.39045397                                             | 31110.45854                                              | 122.9609756                                         |
| 0.3131822                                | 0.268790467                                             | 6954.310992                                              | 214.9155496                                         |
| 0.244645958                              | 0.389803545                                             | 83538.60095                                              | 456.3706625                                         |
| 0.247878788                              | 0.634737089                                             | 66228.93032                                              | 342.8300733                                         |
| 0.227711397                              | 0.469106457                                             | 30561.89203                                              | 244.469223                                          |
| 0.247516072                              | 0.627897186                                             | 155755.9717                                              | 593.566706                                          |
| 0.21228257                               | 1.134651684                                             | 26443.66054                                              | 209.8595318                                         |
| 0.1747851                                | 0.834386346                                             | 150558.4973                                              | 345.4043716                                         |
| 0.133093525                              | 2.542322263                                             | 37933                                                    | 104.7837838                                         |
| 0.214409422                              | 1.322062336                                             | 35995.28756                                              | 244.5904685                                         |

| log.sigma.4.0.mm.3D_glszm_SmallAreaEmphasis | log.sigma.4.0.mm.3D_glszm_LowGrayLevelZoneEmphasis | log.sigma.4.0.mm.3D_glszm_ZoneEntropy | log.sigma.4.0.mm.3D_glszm_SmallAreaLowGrayLevelEmphasis |
|---------------------------------------------|----------------------------------------------------|---------------------------------------|---------------------------------------------------------|
| 0.600509699                                 | 0.005920148                                        | 6.636794123                           | 0.004526464                                             |
| 0.465181532                                 | 0.045536011                                        | 6.102515369                           | 0.020016419                                             |
| 0.561164591                                 | 0.015399947                                        | 6.282931457                           | 0.011425805                                             |
| 0.565245983                                 | 0.010943715                                        | 6.293165386                           | 0.004924708                                             |
| 0.551984839                                 | 0.009263611                                        | 6.47858153                            | 0.006501223                                             |
| 0.575740813                                 | 0.017349614                                        | 5.842486791                           | 0.010659364                                             |
| 0.561091808                                 | 0.007731546                                        | 6.755385964                           | 0.004394622                                             |
| 0.574521305                                 | 0.004243488                                        | 6.824631618                           | 0.002331732                                             |
| 0.527540641                                 | 0.004983343                                        | 6.875632782                           | 0.003344613                                             |
| 0.590909249                                 | 0.005880878                                        | 6.185834718                           | 0.005087526                                             |
| 0.520462169                                 | 0.016952116                                        | 6.250995892                           | 0.007964653                                             |
| 0.548572183                                 | 0.007398715                                        | 6.491428006                           | 0.004709492                                             |
| 0.533345872                                 | 0.011871354                                        | 6.370535573                           | 0.007780094                                             |
| 0.558271694                                 | 0.009075968                                        | 6.625897322                           | 0.006370671                                             |
| 0.584187493                                 | 0.011261259                                        | 6.524387166                           | 0.007041569                                             |
| 0.539331289                                 | 0.00743673                                         | 6.802880972                           | 0.00448594                                              |
| 0.512259296                                 | 0.010226961                                        | 6.366662192                           | 0.007463413                                             |
| 0.514751596                                 | 0.029082044                                        | 6.224263562                           | 0.020526451                                             |
| 0.486291482                                 | 0.037721134                                        | 5.901058008                           | 0.023443605                                             |
| 0.552488518                                 | 0.009152384                                        | 6.892569667                           | 0.005422688                                             |
| 0.541977887                                 | 0.014308795                                        | 6.397060095                           | 0.006976023                                             |
| 0.503956051                                 | 0.028143646                                        | 6.060701108                           | 0.014500966                                             |
| 0.494863102                                 | 0.021402347                                        | 6.079915445                           | 0.01362841                                              |
| 0.556377305                                 | 0.012317904                                        | 6.517474345                           | 0.008997321                                             |
| 0.599046651                                 | 0.007632611                                        | 6.223548351                           | 0.006151865                                             |
| 0.597298041                                 | 0.005662785                                        | 6.649146534                           | 0.002937987                                             |
| 0.578106031                                 | 0.004575671                                        | 6.793195418                           | 0.003237091                                             |
| 0.513182322                                 | 0.007325205                                        | 6.545990071                           | 0.004796369                                             |
| 0.510393897                                 | 0.027929586                                        | 5.577565267                           | 0.020677802                                             |
| 0.49854606                                  | 0.009398262                                        | 6.533262279                           | 0.006522914                                             |
| 0.598848161                                 | 0.00426109                                         | 6.591911602                           | 0.003081498                                             |
| 0.521020076                                 | 0.010127093                                        | 6.448309929                           | 0.007816854                                             |
| 0.557890916                                 | 0.006632873                                        | 6.79330422                            | 0.004306844                                             |
| 0.586749057                                 | 0.006592942                                        | 6.556205174                           | 0.00457421                                              |
| 0.586403113                                 | 0.00519793                                         | 6.520465308                           | 0.002690568                                             |
| 0.573592563                                 | 0.006132431                                        | 6.52602191                            | 0.004327869                                             |
| 0.593588001                                 | 0.004805927                                        | 6.705959628                           | 0.003619464                                             |
| 0.563107855                                 | 0.004097885                                        | 6.953673843                           | 0.002902164                                             |
| 0.421309341                                 | 0.039335592                                        | 6.020150061                           | 0.020366775                                             |
| 0.55372392                                  | 0.010954383                                        | 7.005690373                           | 0.006033846                                             |
| 0.587110248                                 | 0.007001043                                        | 6.531374855                           | 0.005010553                                             |
| 0.576853024                                 | 0.005602627                                        | 6.752978559                           | 0.003469715                                             |
| 0.551044792                                 | 0.006350858                                        | 6.71369953                            | 0.00423655                                              |
| 0.554985131                                 | 0.008943109                                        | 6.545521569                           | 0.005995261                                             |
| 0.5572848                                   | 0.015389814                                        | 6.210905672                           | 0.010698042                                             |
| 0.603738102                                 | 0.00678932                                         | 6.530995852                           | 0.003559293                                             |
| 0.538874035                                 | 0.00586404                                         | 6.760790181                           | 0.003285821                                             |
| 0.505121257                                 | 0.036243256                                        | 5.767699059                           | 0.016289553                                             |
| 0.517826147                                 | 0.017019593                                        | 6.14992557                            | 0.008324495                                             |
| 0.523980441                                 | 0.023072955                                        | 6.105208182                           | 0.015759617                                             |
| 0.566248914                                 | 0.011774967                                        | 6.552780964                           | 0.006394857                                             |
| 0.562489933                                 | 0.006118789                                        | 6.702807537                           | 0.003954307                                             |
| 0.551922221                                 | 0.009173434                                        | 6.637246986                           | 0.005314296                                             |
| 0.563809755                                 | 0.014366038                                        | 6.152141094                           | 0.010147756                                             |
| 0.511338934                                 | 0.020182761                                        | 6.365801358                           | 0.011927742                                             |
| 0.527390548                                 | 0.005729357                                        | 6.57947802                            | 0.002501738                                             |
| 0.559636666                                 | 0.007083029                                        | 6.78369028                            | 0.004793786                                             |
| 0.518852588                                 | 0.007445801                                        | 6.881258772                           | 0.004803418                                             |
| 0.559954447                                 | 0.011527048                                        | 6.308935932                           | 0.008580968                                             |
| 0.558024185                                 | 0.003708237                                        | 6.895198812                           | 0.002419357                                             |
| 0.579533979                                 | 0.010385532                                        | 6.401670949                           | 0.007505123                                             |
| 0.557173378                                 | 0.007301786                                        | 6.517891241                           | 0.005058335                                             |
| 0.589956138                                 | 0.003141387                                        | 6.718330421                           | 0.001595126                                             |
| 0.519123811                                 | 0.003899668                                        | 7.022361468                           | 0.001824279                                             |
| 0.531037536                                 | 0.014913228                                        | 6.060566811                           | 0.01105235                                              |
| 0.541015952                                 | 0.00496668                                         | 6.832411757                           | 0.002627892                                             |
| 0.422610756                                 | 0.0193189                                          | 6.144237818                           | 0.006530635                                             |
| 0.54803139                                  | 0.004071277                                        | 6.980057517                           | 0.00198188                                              |
| 0.595077524                                 | 0.004339606                                        | 6.675085444                           | 0.003053981                                             |
| 0.498179795                                 | 0.01003209                                         | 6.50948149                            | 0.004549912                                             |
| 0.559299518                                 | 0.009822668                                        | 6.233415394                           | 0.006609077                                             |
| 0.570686649                                 | 0.005425838                                        | 6.764925035                           | 0.002952289                                             |
| 0.55503896                                  | 0.006120175                                        | 6.612287226                           | 0.004899584                                             |
| 0.559254319                                 | 0.009220668                                        | 6.555039004                           | 0.005842527                                             |
| 0.560499327                                 | 0.009452177                                        | 6.680383893                           | 0.005217848                                             |
| 0.520774243                                 | 0.01157062                                         | 6.373825334                           | 0.008858625                                             |
| 0.542765505                                 | 0.01578721                                         | 6.389257806                           | 0.008567129                                             |
| 0.488619948                                 | 0.017457192                                        | 6.261305478                           | 0.010967886                                             |
| 0.504308987                                 | 0.012237213                                        | 6.415897912                           | 0.007585509                                             |
| 0.5935585                                   | 0.005715534                                        | 6.717025848                           | 0.004108578                                             |
| 0.610407496                                 | 0.006675826                                        | 6.579421714                           | 0.004924006                                             |
| 0.610557887                                 | 0.013242067                                        | 6.38018861                            | 0.007927689                                             |
| 0.556381769                                 | 0.005777723                                        | 6.733077091                           | 0.003935008                                             |
| 0.503185938                                 | 0.009253253                                        | 6.70118246                            | 0.005982741                                             |
| 0.540686657                                 | 0.007511184                                        | 6.765327221                           | 0.003450948                                             |
| 0.496257903                                 | 0.018595618                                        | 6.015896983                           | 0.012587796                                             |
| 0.579380146                                 | 0.008289735                                        | 6.592604711                           | 0.005269947                                             |
| 0.593643203                                 | 0.006160028                                        | 6.454302325                           | 0.004786111                                             |
| 0.55268771                                  | 0.013195233                                        | 6.235774847                           | 0.008513578                                             |
| 0.536678824                                 | 0.015490807                                        | 6.569206125                           | 0.01174731                                              |
| 0.503589643                                 | 0.020467134                                        | 5.919448726                           | 0.012999401                                             |
| 0.567229806                                 | 0.01501357                                         | 6.603979173                           | 0.007436025                                             |
| 0.56096313                                  | 0.005148574                                        | 6.803725483                           | 0.003706976                                             |
| 0.585317875                                 | 0.006115288                                        | 6.506477585                           | 0.004479574                                             |
| 0.504922249                                 | 0.008504181                                        | 6.830145618                           | 0.0050392                                               |
| 0.619932455                                 | 0.004307946                                        | 6.576325847                           | 0.003017501                                             |
| 0.473648894                                 | 0.017579947                                        | 6.924820027                           | 0.008660126                                             |
| 0.531434585                                 | 0.012167584                                        | 6.061037651                           | 0.004274095                                             |
| 0.403265547                                 | 0.027725114                                        | 5.844632786                           | 0.011409069                                             |
| 0.573103597                                 | 0.010546367                                        | 6.590994353                           | 0.007591833                                             |



| log.sigma.4.0.mm.3D_ngtdm_Coarseness | log.sigma.4.0.mm.3D_ngtdm_Complexity | log.sigma.4.0.mm.3D_ngtdm_Strength | log.sigma.4.0.mm.3D_ngtdm_Busyness | log.sigma.4.0.mm.3D_ngtdm_Contrast |
|--------------------------------------|--------------------------------------|------------------------------------|------------------------------------|------------------------------------|
| 0.005684687                          | 0.497632292                          | 2.978727474                        | 0.175953649                        | 4.22E-05                           |
| 0.011166888                          | 0.14942159                           | 1.351294683                        | 0.665672998                        | 7.82E-05                           |
| 0.0085544                            | 0.225688869                          | 1.935271797                        | 0.33903858                         | 4.50E-05                           |
| 0.012841629                          | 0.568557837                          | 4.014628261                        | 0.143321319                        | 9.86E-05                           |
| 0.004999248                          | 0.169409508                          | 1.318683025                        | 0.421923245                        | 2.30E-05                           |
| 0.016738481                          | 0.489854911                          | 3.467534285                        | 0.242718471                        | 0.000148374                        |
| 0.002138515                          | 0.135721238                          | 1.135469577                        | 0.705516201                        | 7.84E-06                           |
| 0.002512724                          | 0.149655573                          | 1.473869218                        | 0.397779509                        | 8.01E-06                           |
| 0.002760296                          | 0.15813466                           | 1.264701885                        | 0.453198184                        | 1.13E-05                           |
| 0.010954781                          | 0.653623073                          | 5.567579361                        | 0.097842923                        | 5.16E-05                           |
| 0.007903771                          | 0.152787563                          | 1.281273732                        | 0.494052039                        | 4.24E-05                           |
| 0.005152204                          | 0.246804397                          | 1.944773624                        | 0.315761777                        | 2.45E-05                           |
| 0.007041043                          | 0.193509809                          | 2.55656263                         | 0.23903928                         | 2.08E-05                           |
| 0.007797681                          | 0.339636812                          | 2.962261516                        | 0.177760462                        | 3.57E-05                           |
| 0.005507794                          | 0.338958881                          | 2.087772523                        | 0.278523167                        | 3.35E-05                           |
| 0.002825364                          | 0.136961917                          | 0.955348058                        | 0.641933847                        | 1.64E-05                           |
| 0.009268598                          | 0.360069669                          | 2.868286086                        | 0.183326505                        | 5.17E-05                           |
| 0.009560826                          | 0.163062096                          | 1.5229885                          | 0.559243326                        | 5.93E-05                           |
| 0.00840229                           | 0.091780361                          | 0.84152662                         | 0.97405798                         | 5.64E-05                           |
| 0.002494827                          | 0.116663181                          | 0.935658606                        | 0.757190978                        | 1.21E-05                           |
| 0.004449792                          | 0.086604451                          | 1.062043944                        | 0.637497347                        | 1.25E-05                           |
| 0.010952678                          | 0.170993669                          | 1.437710886                        | 0.49387743                         | 6.76E-05                           |
| 0.011702602                          | 0.216405958                          | 1.97503228                         | 0.370538428                        | 7.34E-05                           |
| 0.004361708                          | 0.174728495                          | 1.442533858                        | 0.465675742                        | 1.60E-05                           |
| 0.007930651                          | 0.471322232                          | 2.544435643                        | 0.2005453                          | 5.66E-05                           |
| 0.004782854                          | 0.426138068                          | 2.883790547                        | 0.197907001                        | 2.41E-05                           |
| 0.003645179                          | 0.330502447                          | 2.62400831                         | 0.223519951                        | 1.61E-05                           |
| 0.004391351                          | 0.153845203                          | 1.284268862                        | 0.416086305                        | 1.84E-05                           |
| 0.023974745                          | 0.28107441                           | 2.444680039                        | 0.375596683                        | 0.000203828                        |
| 0.005574179                          | 0.140153062                          | 1.466760592                        | 0.38369602                         | 1.87E-05                           |
| 0.002570902                          | 0.129805912                          | 1.077857339                        | 0.489461992                        | 1.03E-05                           |
| 0.005356826                          | 0.206435556                          | 2.385796404                        | 0.231997076                        | 1.49E-05                           |
| 0.004110806                          | 0.238895465                          | 1.852094835                        | 0.312047434                        | 2.13E-05                           |
| 0.005115958                          | 0.321659019                          | 2.335023781                        | 0.238148498                        | 2.77E-05                           |
| 0.002582199                          | 0.122273196                          | 0.891215497                        | 0.648483855                        | 1.37E-05                           |
| 0.003971361                          | 0.187752003                          | 1.756629253                        | 0.328645672                        | 1.36E-05                           |
| 0.003405604                          | 0.206231932                          | 2.500076564                        | 0.225247353                        | 8.07E-06                           |
| 0.002847104                          | 0.190687463                          | 1.864012191                        | 0.313177594                        | 9.94E-06                           |
| 0.008731624                          | 0.065715127                          | 0.686666323                        | 0.763011917                        | 3.40E-05                           |
| 0.001936089                          | 0.083471323                          | 0.674179351                        | 1.047319596                        | 1.11E-05                           |
| 0.004869715                          | 0.246353566                          | 2.438393809                        | 0.212451315                        | 1.57E-05                           |
| 0.00328537                           | 0.273393144                          | 1.991388484                        | 0.365202171                        | 1.52E-05                           |
| 0.003183653                          | 0.175769894                          | 1.096212533                        | 0.513534939                        | 1.97E-05                           |
| 0.004569914                          | 0.30873459                           | 2.247302292                        | 0.298909249                        | 1.79E-05                           |
| 0.008965201                          | 0.256474264                          | 2.123936797                        | 0.380534276                        | 5.13E-05                           |
| 0.004072333                          | 0.250317782                          | 1.591208133                        | 0.357192885                        | 2.46E-05                           |
| 0.002600151                          | 0.129818807                          | 1.061653813                        | 0.55358317                         | 9.48E-06                           |
| 0.014391425                          | 0.103851809                          | 1.230536882                        | 0.742202402                        | 8.45E-05                           |
| 0.014004105                          | 0.387880611                          | 3.021507066                        | 0.229958433                        | 8.95E-05                           |
| 0.008583949                          | 0.201099883                          | 1.789920164                        | 0.52908842                         | 4.53E-05                           |
| 0.004600191                          | 0.201176135                          | 1.364742826                        | 0.424123381                        | 3.05E-05                           |
| 0.003456422                          | 0.228179257                          | 1.368084803                        | 0.463667726                        | 2.12E-05                           |
| 0.002569478                          | 0.094145978                          | 0.76299748                         | 0.817521466                        | 1.14E-05                           |
| 0.009753785                          | 0.354180838                          | 1.93686619                         | 0.318793043                        | 7.43E-05                           |
| 0.008654797                          | 0.254245744                          | 1.645704538                        | 0.495297516                        | 7.55E-05                           |
| 0.006427931                          | 0.212986453                          | 2.240740927                        | 0.218576741                        | 2.26E-05                           |
| 0.003041773                          | 0.150324367                          | 1.034422411                        | 0.547507441                        | 1.77E-05                           |
| 0.003779011                          | 0.162406657                          | 1.762125275                        | 0.31360199                         | 1.45E-05                           |
| 0.006919761                          | 0.225790833                          | 1.703163142                        | 0.283449139                        | 2.80E-05                           |
| 0.001381895                          | 0.085273201                          | 0.746258602                        | 0.759599711                        | 4.54E-06                           |
| 0.007078326                          | 0.276628622                          | 2.761751785                        | 0.288269089                        | 2.58E-05                           |
| 0.004595942                          | 0.180552776                          | 1.469611487                        | 0.405433471                        | 2.23E-05                           |
| 0.001926223                          | 0.174390444                          | 1.249580196                        | 0.458396168                        | 7.84E-06                           |
| 0.001826542                          | 0.093856421                          | 0.96862112                         | 0.62755172                         | 5.40E-06                           |
| 0.013308074                          | 0.341143442                          | 2.327812028                        | 0.262716898                        | 8.82E-05                           |
| 0.003637426                          | 0.171343975                          | 2.183610555                        | 0.263624228                        | 8.44E-06                           |
| 0.010001743                          | 0.134533286                          | 1.96442601                         | 0.265141034                        | 2.08E-05                           |
| 0.002159668                          | 0.142505212                          | 1.363899556                        | 0.431600085                        | 6.42E-06                           |
| 0.00216073                           | 0.123226853                          | 1.17098434                         | 0.483674281                        | 7.29E-06                           |
| 0.00422585                           | 0.092613079                          | 0.922740333                        | 0.613548532                        | 1.44E-05                           |
| 0.009134482                          | 0.395470806                          | 3.496106432                        | 0.158273469                        | 4.08E-05                           |
| 0.002995379                          | 0.15931381                           | 1.449844562                        | 0.407278488                        | 1.21E-05                           |
| 0.005226974                          | 0.301561095                          | 2.911769371                        | 0.199351984                        | 2.05E-05                           |
| 0.005434997                          | 0.256045003                          | 1.630832539                        | 0.315851872                        | 3.69E-05                           |
| 0.004021104                          | 0.201244174                          | 1.50586854                         | 0.500827792                        | 2.45E-05                           |
| 0.008153617                          | 0.301042467                          | 2.640292917                        | 0.204260108                        | 3.82E-05                           |
| 0.004894792                          | 0.115253711                          | 1.009885173                        | 0.586494252                        | 1.80E-05                           |
| 0.014906674                          | 0.297852752                          | 3.870801287                        | 0.201208877                        | 5.24E-05                           |
| 0.006944124                          | 0.163207172                          | 1.453714056                        | 0.419076425                        | 3.04E-05                           |
| 0.005233514                          | 0.397645102                          | 3.17208142                         | 0.177660858                        | 3.41E-05                           |
| 0.006201526                          | 0.516515225                          | 3.283666433                        | 0.160782109                        | 4.64E-05                           |
| 0.006579816                          | 0.298097804                          | 2.93398821                         | 0.216325703                        | 2.03E-05                           |
| 0.00369957                           | 0.195003073                          | 1.637576917                        | 0.345225145                        | 1.50E-05                           |
| 0.00422482                           | 0.116792764                          | 1.412133496                        | 0.404838873                        | 1.27E-05                           |
| 0.005155261                          | 0.341384742                          | 2.564557393                        | 0.253113676                        | 2.55E-05                           |
| 0.008863632                          | 0.119570486                          | 1.637193571                        | 0.401228254                        | 2.85E-05                           |
| 0.005104792                          | 0.268536299                          | 1.990656809                        | 0.267442129                        | 3.17E-05                           |
| 0.004318118                          | 0.230151975                          | 1.744962888                        | 0.333062116                        | 1.90E-05                           |
| 0.007826284                          | 0.219472274                          | 1.779626848                        | 0.350921024                        | 4.05E-05                           |
| 0.006425668                          | 0.204017399                          | 2.064598228                        | 0.278141691                        | 2.36E-05                           |
| 0.00879035                           | 0.106423644                          | 1.13870698                         | 0.832087086                        | 7.38E-05                           |
| 0.004864666                          | 0.203104247                          | 1.296032979                        | 0.545815545                        | 3.99E-05                           |
| 0.002504391                          | 0.135787135                          | 1.398710412                        | 0.393425594                        | 7.61E-06                           |
| 0.003446512                          | 0.178137826                          | 1.354003666                        | 0.405941729                        | 1.46E-05                           |
| 0.00283837                           | 0.105415114                          | 0.896553145                        | 0.642190824                        | 1.09E-05                           |
| 0.003764506                          | 0.289754508                          | 2.601373052                        | 0.220257974                        | 1.44E-05                           |
| 0.004925663                          | 0.124876781                          | 1.269985763                        | 0.556789202                        | 2.63E-05                           |
| 0.012594195                          | 0.410203465                          | 5.662887841                        | 0.098805238                        | 4.84E-05                           |
| 0.015108764                          | 0.138410327                          | 1.777061856                        | 0.308581919                        | 5.44E-05                           |
| 0.002005102                          | 0.07456786                           | 0.502430266                        | 1.190618809                        | 1.10E-05                           |

| log.sigma.3.5.mm.3D_gldm_GrayLevelVariance | log.sigma.3.5.mm.3D_gldm_HighGrayLevelEmphasis | log.sigma.3.5.mm.3D_gldm_GrayLevelNonUniformityNormalized | log.sigma.3.5.mm.3D_gldm_DependenceEntropy |
|--------------------------------------------|------------------------------------------------|-----------------------------------------------------------|--------------------------------------------|
| 32.19070822                                | 582.4491046                                    | 0.057743437                                               | 6.918520382                                |
| 10.16305185                                | 104.4502674                                    | 0.10606766                                                | 6.353299661                                |
| 15.34952379                                | 195.0912647                                    | 0.072789904                                               | 6.86326156                                 |
| 26.24942354                                | 322.7799386                                    | 0.059710077                                               | 6.796336523                                |
| 14.90969383                                | 266.7242399                                    | 0.079261351                                               | 6.835197277                                |
| 20.43837236                                | 159.9287879                                    | 0.074040404                                               | 6.573821252                                |
| 17.63546544                                | 337.2357105                                    | 0.072241291                                               | 6.941031609                                |
| 18.49524032                                | 507.5215348                                    | 0.076581317                                               | 6.875307753                                |
| 19.11133631                                | 466.5743511                                    | 0.066588032                                               | 6.96779124                                 |
| 18.69770463                                | 573.0102612                                    | 0.071417632                                               | 6.727012395                                |
| 11.52899655                                | 158.1830239                                    | 0.085353798                                               | 6.642129937                                |
| 18.90564528                                | 362.835141                                     | 0.070409418                                               | 6.850686908                                |
| 13.75518929                                | 288.6363149                                    | 0.113517012                                               | 6.808455755                                |
| 22.39887059                                | 476.3593477                                    | 0.073466914                                               | 6.826274547                                |
| 20.95082332                                | 395.4435484                                    | 0.073961145                                               | 6.694579349                                |
| 20.53683775                                | 332.3304388                                    | 0.065847472                                               | 6.905127629                                |
| 16.20614519                                | 300.8375209                                    | 0.079701972                                               | 6.474265556                                |
| 12.62531006                                | 117.5506894                                    | 0.099931658                                               | 6.660710729                                |
| 9.035724037                                | 109.7457627                                    | 0.101426635                                               | 6.454130042                                |
| 20.35361033                                | 285.1996538                                    | 0.066021433                                               | 6.997485179                                |
| 10.88228815                                | 164.6537698                                    | 0.099638518                                               | 6.80361258                                 |
| 11.22582524                                | 124.2863763                                    | 0.083816839                                               | 6.451386363                                |
| 13.73217773                                | 147.0625                                       | 0.087305069                                               | 6.626070651                                |
| 13.14596233                                | 224.2678504                                    | 0.08339198                                                | 6.771739198                                |
| 17.31990233                                | 346.6582875                                    | 0.075670969                                               | 6.706507901                                |
| 25.00015983                                | 564.7729                                       | 0.065363235                                               | 6.848724851                                |
| 25.05675149                                | 496.482524                                     | 0.069142654                                               | 6.981376418                                |
| 15.15146126                                | 341.8682114                                    | 0.082170304                                               | 6.775516627                                |
| 10.71969731                                | 100.7785235                                    | 0.098238818                                               | 6.109929343                                |
| 10.34654233                                | 255.9995131                                    | 0.099213637                                               | 6.680343472                                |
| 17.11945616                                | 457.3430013                                    | 0.075042481                                               | 7.010181401                                |
| 17.72164856                                | 361.6955051                                    | 0.115454472                                               | 6.529314636                                |
| 25.47623988                                | 410.1049861                                    | 0.060371032                                               | 7.016639143                                |
| 22.44356288                                | 398.6714894                                    | 0.067659574                                               | 6.936197822                                |
| 16.98756064                                | 327.4641235                                    | 0.070449641                                               | 6.819570036                                |
| 14.79495633                                | 413.7819273                                    | 0.083118403                                               | 6.804603728                                |
| 16.54767926                                | 652.0591239                                    | 0.099755515                                               | 6.888414436                                |
| 24.94141359                                | 610.626429                                     | 0.069645686                                               | 7.270829641                                |
| 5.528101659                                | 118.1813008                                    | 0.124671822                                               | 6.192948774                                |
| 24.62590397                                | 273.0676754                                    | 0.057216879                                               | 7.063577688                                |
| 17.47131317                                | 376.9055513                                    | 0.091337937                                               | 6.802007359                                |
| 26.92116521                                | 371.1114559                                    | 0.05753276                                                | 6.875418601                                |
| 19.83378252                                | 390.3514919                                    | 0.064872487                                               | 6.847116627                                |
| 17.88780358                                | 374.2596463                                    | 0.075621827                                               | 6.75790463                                 |
| 15.03871709                                | 157.6150235                                    | 0.082789031                                               | 6.653241669                                |
| 19.82476581                                | 364.228051                                     | 0.068868385                                               | 6.904379971                                |
| 16.40379896                                | 374.7183253                                    | 0.078957059                                               | 6.835259957                                |
| 9.082111302                                | 80.0206659                                     | 0.105650762                                               | 6.446148757                                |
| 16.73293464                                | 199.920094                                     | 0.072147097                                               | 6.535273767                                |
| 13.2394524                                 | 114.6050296                                    | 0.090068187                                               | 6.716367589                                |
| 20.48863254                                | 338.3382639                                    | 0.065982238                                               | 6.807507106                                |
| 22.5546385                                 | 329.7353901                                    | 0.061291359                                               | 6.856799628                                |
| 14.22718908                                | 244.4835993                                    | 0.081274305                                               | 6.793358814                                |
| 15.18477933                                | 138.0652174                                    | 0.074265517                                               | 6.552330864                                |
| 17.85293911                                | 177.4857143                                    | 0.068161004                                               | 6.687001882                                |
| 14.40169915                                | 510.5030769                                    | 0.087397765                                               | 6.607290572                                |
| 20.72840703                                | 309.3166873                                    | 0.063931023                                               | 6.897526329                                |
| 18.79412213                                | 374.0043378                                    | 0.081293459                                               | 6.870870227                                |
| 12.87606042                                | 249.2293689                                    | 0.089570176                                               | 6.504173579                                |
| 18.88680419                                | 484.588783                                     | 0.069846579                                               | 7.19645105                                 |
| 15.61400411                                | 220.4150623                                    | 0.092607437                                               | 6.828911791                                |
| 16.50620713                                | 342.5318352                                    | 0.074258581                                               | 6.780537058                                |
| 19.42943994                                | 521.2544481                                    | 0.070349079                                               | 6.925235533                                |
| 19.48049935                                | 466.550833                                     | 0.07327547                                                | 6.998134593                                |
| 12.23179138                                | 160.6088608                                    | 0.081595898                                               | 6.491524099                                |
| 16.80761257                                | 500.8190057                                    | 0.089658602                                               | 6.889742755                                |
| 7.928021731                                | 230.1986196                                    | 0.128427397                                               | 6.518935537                                |
| 20.60159747                                | 528.06192                                      | 0.074425651                                               | 6.99155504                                 |
| 18.4603337                                 | 481.8453133                                    | 0.072780618                                               | 6.924445136                                |
| 10.07540433                                | 216.7681159                                    | 0.09506592                                                | 6.68895429                                 |
| 16.50259423                                | 340.1424172                                    | 0.08044383                                                | 6.641859087                                |
| 19.83501638                                | 442.0944056                                    | 0.072522753                                               | 7.005182653                                |
| 18.4716132                                 | 488.8609039                                    | 0.079408476                                               | 6.798057075                                |
| 24.28039453                                | 342.3634351                                    | 0.062339007                                               | 6.784052641                                |
| 23.66537344                                | 267.1788566                                    | 0.060927185                                               | 6.936395581                                |
| 14.21249786                                | 295.1870343                                    | 0.092186185                                               | 6.57270958                                 |
| 9.954932365                                | 171.5822204                                    | 0.096442039                                               | 6.657466041                                |
| 14.78182191                                | 168.9770355                                    | 0.090406684                                               | 6.675692077                                |
| 11.92536333                                | 192.5577036                                    | 0.087184683                                               | 6.677342136                                |
| 30.5223296                                 | 504.1941                                       | 0.062799116                                               | 6.831453606                                |
| 33.20284693                                | 535.5801911                                    | 0.058302312                                               | 6.920858456                                |
| 15.28713407                                | 230.9638688                                    | 0.089932304                                               | 6.796544943                                |
| 17.73197031                                | 407.821658                                     | 0.074400163                                               | 6.899473839                                |
| 12.44808944                                | 235.9179954                                    | 0.089789416                                               | 6.724249233                                |
| 23.57057525                                | 357.0410004                                    | 0.061692757                                               | 6.979074367                                |
| 9.80707824                                 | 181.6018277                                    | 0.110793072                                               | 6.617402623                                |
| 24.23165153                                | 371.8469602                                    | 0.069325493                                               | 6.949639429                                |
| 17.68095091                                | 295.0091174                                    | 0.073539575                                               | 6.953726308                                |
| 13.73892127                                | 203.8736339                                    | 0.08427954                                                | 6.687791642                                |
| 15.24613931                                | 316.5471605                                    | 0.08474635                                                | 6.840398729                                |
| 12.19934887                                | 84.55368098                                    | 0.119687182                                               | 6.472975811                                |
| 21.24550082                                | 230.2069689                                    | 0.063192598                                               | 6.865711624                                |
| 18.69601934                                | 476.7204322                                    | 0.075112618                                               | 6.874114523                                |
| 16.02613407                                | 372.6636364                                    | 0.080048669                                               | 6.833279368                                |
| 15.40341656                                | 247.1886489                                    | 0.074862153                                               | 6.725642154                                |
| 23.61757926                                | 483.1072472                                    | 0.07052981                                                | 7.137395351                                |
| 18.7078485                                 | 207.8899539                                    | 0.068690537                                               | 6.950939626                                |
| 16.86564332                                | 419.2378223                                    | 0.099839538                                               | 6.704659939                                |
| 8.109736671                                | 160.8129496                                    | 0.106668622                                               | 6.438793184                                |
| 14.67523182                                | 270.0493592                                    | 0.080838353                                               | 6.841553453                                |

| log.sigma.3.5.mm.3D_gldm_DependenceNonUniformity | log.sigma.3.5.mm.3D_gldm_GrayLevelNonUniformity | log.sigma.3.5.mm.3D_gldm_SmallDependenceEmphasis |
|--------------------------------------------------|-------------------------------------------------|--------------------------------------------------|
| 385.1328935                                      | 122.531574                                      | 0.322512662                                      |
| 124.1657754                                      | 99.17326203                                     | 0.162357438                                      |
| 203.0247718                                      | 111.6597132                                     | 0.191858077                                      |
| 169.9580348                                      | 58.33674514                                     | 0.272656426                                      |
| 331.6993243                                      | 187.6908784                                     | 0.21241635                                       |
| 102.9727273                                      | 48.86666667                                     | 0.248982789                                      |
| 810.453548                                       | 408.2355335                                     | 0.221574109                                      |
| 707.9592796                                      | 391.1773688                                     | 0.206833338                                      |
| 690.7589089                                      | 302.7091949                                     | 0.22777434                                       |
| 161.7873134                                      | 76.55970149                                     | 0.254453557                                      |
| 207.433687                                       | 128.7135279                                     | 0.21472885                                       |
| 343.0425163                                      | 162.2937093                                     | 0.242604101                                      |
| 174.5597215                                      | 211.9362614                                     | 0.150777351                                      |
| 245.1910309                                      | 126.1426907                                     | 0.237203389                                      |
| 319.2469758                                      | 146.7389113                                     | 0.259511027                                      |
| 676.7157221                                      | 288.1485375                                     | 0.227410406                                      |
| 203.2328308                                      | 95.1641541                                      | 0.244605664                                      |
| 140.7437145                                      | 123.215734                                      | 0.173292294                                      |
| 165.6394453                                      | 131.651772                                      | 0.172651786                                      |
| 792.0417388                                      | 343.2454318                                     | 0.22684406                                       |
| 319.042328                                       | 301.3068783                                     | 0.145105982                                      |
| 168.3697868                                      | 90.43836886                                     | 0.200502374                                      |
| 138.4550781                                      | 89.40039063                                     | 0.190300045                                      |
| 363.6407253                                      | 220.738572                                      | 0.217101709                                      |
| 195.325216                                       | 96.32914375                                     | 0.257294281                                      |
| 398.2663571                                      | 154.8455044                                     | 0.287558339                                      |
| 484.9795855                                      | 223.5381998                                     | 0.251607475                                      |
| 374.2860246                                      | 226.9543809                                     | 0.223111734                                      |
| 64.35123043                                      | 43.91275168                                     | 0.207257364                                      |
| 252.6290166                                      | 203.7848101                                     | 0.166664459                                      |
| 629.3690626                                      | 357.0521227                                     | 0.207711902                                      |
| 223.8351861                                      | 238.8753021                                     | 0.166092144                                      |
| 516.2195726                                      | 194.9380613                                     | 0.256058226                                      |
| 356.8382979                                      | 159                                             | 0.252882726                                      |
| 691.8551317                                      | 310.260218                                      | 0.241760376                                      |
| 379.0526842                                      | 249.2720907                                     | 0.192318735                                      |
| 400.3501747                                      | 371.1902714                                     | 0.179371473                                      |
| 617.5967836                                      | 359.4413873                                     | 0.210853892                                      |
| 149.795122                                       | 153.3463415                                     | 0.139310288                                      |
| 1228.369188                                      | 415.9667125                                     | 0.247525234                                      |
| 317.7062452                                      | 236.9306091                                     | 0.203972454                                      |
| 744.873804                                       | 222.4791828                                     | 0.305171617                                      |
| 596.1590474                                      | 236.9791952                                     | 0.257618178                                      |
| 374.9244373                                      | 188.1471061                                     | 0.243789521                                      |
| 173.8591549                                      | 105.8043818                                     | 0.206928897                                      |
| 405.2783242                                      | 189.0437158                                     | 0.254716045                                      |
| 651.5633494                                      | 360.2021043                                     | 0.20866554                                       |
| 104.2560276                                      | 92.02181401                                     | 0.138413136                                      |
| 143.3266745                                      | 61.39717979                                     | 0.237537484                                      |
| 153.5473373                                      | 121.7721893                                     | 0.188011062                                      |
| 428.7220708                                      | 169.508369                                      | 0.255462999                                      |
| 609.5843963                                      | 206.6131712                                     | 0.280724157                                      |
| 636.5820035                                      | 366.7096631                                     | 0.212977652                                      |
| 174.5235507                                      | 81.98913043                                     | 0.243909549                                      |
| 212.9819549                                      | 90.65413534                                     | 0.24097602                                       |
| 274.6615385                                      | 170.425641                                      | 0.197288634                                      |
| 669.4123609                                      | 258.6009889                                     | 0.259064549                                      |
| 459.761712                                       | 281.112782                                      | 0.196956682                                      |
| 242.0291262                                      | 147.6116505                                     | 0.217966487                                      |
| 1210.319093                                      | 637.6294227                                     | 0.214350039                                      |
| 206.8776897                                      | 163.5447339                                     | 0.197707623                                      |
| 393.7962547                                      | 198.270412                                      | 0.215842332                                      |
| 895.0621869                                      | 407.2508205                                     | 0.257026736                                      |
| 1065.498754                                      | 558.5789059                                     | 0.202103441                                      |
| 119.4734177                                      | 64.46075949                                     | 0.187627894                                      |
| 450.4179182                                      | 346.2615225                                     | 0.181114901                                      |
| 129.4279141                                      | 167.4693252                                     | 0.126254332                                      |
| 888.74208                                        | 465.16032                                       | 0.223621465                                      |
| 855.1205395                                      | 426.2760799                                     | 0.24779779                                       |
| 354.6038647                                      | 275.5010352                                     | 0.163546799                                      |
| 191.0862202                                      | 104.4965358                                     | 0.206812992                                      |
| 564.7752914                                      | 311.1226107                                     | 0.206636333                                      |
| 324.1978938                                      | 180.9719175                                     | 0.211616283                                      |
| 399.8809208                                      | 140.8238158                                     | 0.286446183                                      |
| 531.3302459                                      | 190.763015                                      | 0.264586249                                      |
| 183.2250373                                      | 123.7138599                                     | 0.205478602                                      |
| 293.9874791                                      | 231.0751252                                     | 0.168098797                                      |
| 117.4363257                                      | 86.60960334                                     | 0.170164629                                      |
| 237.4335091                                      | 148.8242531                                     | 0.196338958                                      |
| 418.2150492                                      | 146.8871313                                     | 0.283378789                                      |
| 360.4067371                                      | 115.9632981                                     | 0.330427369                                      |
| 228.0150083                                      | 161.7882157                                     | 0.218986813                                      |
| 457.4686448                                      | 243.2141328                                     | 0.211482947                                      |
| 414.1096648                                      | 275.9228767                                     | 0.164639168                                      |
| 394.2915129                                      | 150.4686347                                     | 0.261433533                                      |
| 164.6083551                                      | 169.7349869                                     | 0.114460465                                      |
| 346.6226415                                      | 165.3412998                                     | 0.253279481                                      |
| 367.4405543                                      | 201.6455142                                     | 0.241765379                                      |
| 203.226776                                       | 123.3852459                                     | 0.206008106                                      |
| 252.7382716                                      | 171.611358                                      | 0.184351798                                      |
| 119.7254601                                      | 156.0720859                                     | 0.152425899                                      |
| 398.9084803                                      | 150.5247691                                     | 0.280061285                                      |
| 775.9697087                                      | 389.3087015                                     | 0.230960141                                      |
| 457.4006061                                      | 264.1606061                                     | 0.230043536                                      |
| 712.6861213                                      | 325.8000919                                     | 0.220650931                                      |
| 433.5762712                                      | 241.3530099                                     | 0.240332843                                      |
| 415.5608804                                      | 193.5012425                                     | 0.218440384                                      |
| 115.4278892                                      | 104.5319962                                     | 0.170681976                                      |
| 99.58992806                                      | 88.9616307                                      | 0.157205                                         |
| 749.6390717                                      | 466.7606512                                     | 0.205527629                                      |

| log.sigma.3.5.mm.3D_gldm_DependenceNonUniformityNormalized | log.sigma.3.5.mm.3D_gldm_DependenceVariance | log.sigma.3.5.mm.3D_gldm_LargeDependenceEmphasis |
|------------------------------------------------------------|---------------------------------------------|--------------------------------------------------|
| 0.181495237                                                | 4.704350367                                 | 14.44863336                                      |
| 0.132797621                                                | 6.231954016                                 | 25.04064171                                      |
| 0.132349916                                                | 5.660002142                                 | 22.70925684                                      |
| 0.173959094                                                | 3.932312167                                 | 14.58648925                                      |
| 0.140075728                                                | 5.463588272                                 | 20.80827703                                      |
| 0.156019284                                                | 5.620881543                                 | 18.71212121                                      |
| 0.143417722                                                | 5.935437438                                 | 20.82976464                                      |
| 0.138598136                                                | 5.317456487                                 | 20.92521535                                      |
| 0.151948726                                                | 4.786865805                                 | 18.24637044                                      |
| 0.150921001                                                | 5.51400298                                  | 18.7630597                                       |
| 0.137555495                                                | 6.623326344                                 | 22.65517241                                      |
| 0.148825387                                                | 4.784231958                                 | 18.09327549                                      |
| 0.093497441                                                | 14.03377639                                 | 45.08141403                                      |
| 0.142801998                                                | 5.692047967                                 | 20.09842749                                      |
| 0.160910774                                                | 4.157436915                                 | 15.87701613                                      |
| 0.154642532                                                | 4.736246027                                 | 18.03473492                                      |
| 0.170211751                                                | 3.60796164                                  | 15                                               |
| 0.114147376                                                | 7.623320303                                 | 29.16707218                                      |
| 0.127611283                                                | 6.669260044                                 | 25.67026194                                      |
| 0.152345016                                                | 4.930839712                                 | 18.48836315                                      |
| 0.105503415                                                | 9.030306052                                 | 34.89748677                                      |
| 0.156042435                                                | 3.617469235                                 | 17.49119555                                      |
| 0.135210037                                                | 5.817001343                                 | 22.671875                                        |
| 0.137378438                                                | 5.857953826                                 | 21.51227805                                      |
| 0.153436933                                                | 4.89902248                                  | 17.53417125                                      |
| 0.168115811                                                | 3.757717927                                 | 14.29759392                                      |
| 0.150009151                                                | 5.330690914                                 | 18.53727188                                      |
| 0.135512681                                                | 5.841640533                                 | 21.49022448                                      |
| 0.143962484                                                | 4.630251891                                 | 19.38478747                                      |
| 0.122993679                                                | 6.703840513                                 | 26.68743914                                      |
| 0.132275969                                                | 6.369722391                                 | 23.10088272                                      |
| 0.108185204                                                | 7.979890959                                 | 31.20492992                                      |
| 0.159869796                                                | 3.914413557                                 | 15.68256426                                      |
| 0.151846084                                                | 7.49388067                                  | 21.47829787                                      |
| 0.157096987                                                | 4.352052176                                 | 16.87375114                                      |
| 0.126393026                                                | 6.804204936                                 | 25.18339446                                      |
| 0.107592092                                                | 9.074121391                                 | 32.21795216                                      |
| 0.119666108                                                | 16.82722584                                 | 40.15869018                                      |
| 0.121784652                                                | 6.285613061                                 | 28.10894309                                      |
| 0.168964125                                                | 3.580172592                                 | 14.85942228                                      |
| 0.12247735                                                 | 6.936896069                                 | 25.32690825                                      |
| 0.192623171                                                | 2.758475852                                 | 11.44168606                                      |
| 0.163197111                                                | 3.439050317                                 | 14.76348207                                      |
| 0.150693102                                                | 4.399514454                                 | 17.31672026                                      |
| 0.136040027                                                | 5.206220106                                 | 21.05633803                                      |
| 0.147642377                                                | 5.434990063                                 | 18.80473588                                      |
| 0.142824057                                                | 6.066782549                                 | 21.52433143                                      |
| 0.119696932                                                | 8.006129381                                 | 31.2250287                                       |
| 0.168421474                                                | 3.746653208                                 | 15.39952996                                      |
| 0.113570516                                                | 8.440023108                                 | 29.71449704                                      |
| 0.166882861                                                | 3.80766152                                  | 15.11599844                                      |
| 0.180831918                                                | 3.261360333                                 | 13.06526253                                      |
| 0.141086437                                                | 4.781295387                                 | 19.6427305                                       |
| 0.158082926                                                | 3.932852867                                 | 16.10688406                                      |
| 0.160136808                                                | 4.85391147                                  | 17.42706767                                      |
| 0.140852071                                                | 4.780433925                                 | 20.41333333                                      |
| 0.165491313                                                | 3.853098868                                 | 15.16563659                                      |
| 0.132955961                                                | 5.780612496                                 | 22.68131868                                      |
| 0.146862334                                                | 4.831450596                                 | 19.1407767                                       |
| 0.132579592                                                | 9.336978197                                 | 27.1367072                                       |
| 0.117144785                                                | 9.010602946                                 | 29.44960362                                      |
| 0.147489234                                                | 5.023227146                                 | 19.37228464                                      |
| 0.154614301                                                | 5.57176919                                  | 18.48281223                                      |
| 0.139774204                                                | 5.114100573                                 | 20.64843238                                      |
| 0.151232174                                                | 4.216414036                                 | 19.06329114                                      |
| 0.116628151                                                | 8.525476693                                 | 29.57793889                                      |
| 0.099254535                                                | 10.61136098                                 | 40.59202454                                      |
| 0.142198733                                                | 5.413691494                                 | 20.12736                                         |
| 0.145999751                                                | 5.345945186                                 | 18.98053611                                      |
| 0.122361582                                                | 6.994807109                                 | 27.45341615                                      |
| 0.147102556                                                | 5.100857473                                 | 19.85142417                                      |
| 0.131649252                                                | 6.017588255                                 | 22.6997669                                       |
| 0.142254451                                                | 5.456246735                                 | 20.67617376                                      |
| 0.177016787                                                | 3.569456961                                 | 13.61266047                                      |
| 0.169699855                                                | 3.57931814                                  | 14.42446503                                      |
| 0.136531324                                                | 5.834519735                                 | 21.89418778                                      |
| 0.122699282                                                | 6.667689053                                 | 26.71535893                                      |
| 0.122584891                                                | 7.729921854                                 | 28.12108559                                      |
| 0.13909403                                                 | 5.690749246                                 | 21.87404804                                      |
| 0.178800791                                                | 3.318758944                                 | 13.21205643                                      |
| 0.181199968                                                | 4.924372637                                 | 14.69431875                                      |
| 0.126745419                                                | 7.522578939                                 | 25.065592                                        |
| 0.139941464                                                | 5.427511199                                 | 20.77118385                                      |
| 0.134757457                                                | 5.066228022                                 | 22.91018549                                      |
| 0.161661137                                                | 4.083235371                                 | 15.66666667                                      |
| 0.107446707                                                | 8.738516521                                 | 37.42950392                                      |
| 0.145334441                                                | 5.819326064                                 | 19.64150943                                      |
| 0.134004579                                                | 7.265193194                                 | 23.12545587                                      |
| 0.138816104                                                | 6.120201783                                 | 22.15300546                                      |
| 0.124809023                                                | 6.424958147                                 | 25.13432099                                      |
| 0.091814003                                                | 13.14749097                                 | 44.12730061                                      |
| 0.167467876                                                | 4.378391392                                 | 15.37783375                                      |
| 0.149714395                                                | 4.962669816                                 | 18.61257959                                      |
| 0.138606244                                                | 6.359972452                                 | 21.71212121                                      |
| 0.163760598                                                | 3.655531728                                 | 16.01838235                                      |
| 0.126702592                                                | 8.478585124                                 | 25.84862653                                      |
| 0.147518949                                                | 5.027136702                                 | 19.29605964                                      |
| 0.110246313                                                | 9.451106495                                 | 32.61413563                                      |
| 0.119412384                                                | 6.25931485                                  | 27.61390887                                      |
| 0.129830113                                                | 6.569151467                                 | 23.77138899                                      |

| log.sigma.3.5.mm.3D_gldm_LargeDependenceLowGrayLevelEmphasis | log.sigma.3.5.mm.3D_gldm_SmallDependenceHighGrayLevelEmphasis | log.sigma.3.5.mm.3D_gldm_LargeDependenceHighGrayLevelEmphasis |
|--------------------------------------------------------------|---------------------------------------------------------------|---------------------------------------------------------------|
| 0.029452284                                                  | 170.8504063                                                   | 8718.584826                                                   |
| 0.357144955                                                  | 19.28242251                                                   | 2258.2                                                        |
| 0.176044758                                                  | 39.28208036                                                   | 3841.181226                                                   |
| 0.070868468                                                  | 83.80860847                                                   | 4701.928352                                                   |
| 0.095535896                                                  | 53.71504802                                                   | 5438.274071                                                   |
| 0.226986254                                                  | 47.35134026                                                   | 2288.274242                                                   |
| 0.081015832                                                  | 79.83674147                                                   | 6163.938595                                                   |
| 0.048967509                                                  | 109.7824991                                                   | 9746.582224                                                   |
| 0.046943969                                                  | 101.9589271                                                   | 8164.1652                                                     |
| 0.040382615                                                  | 142.5058109                                                   | 10160.22854                                                   |
| 0.199767816                                                  | 32.11179043                                                   | 3390.994695                                                   |
| 0.061665637                                                  | 85.78011045                                                   | 6186.95141                                                    |
| 0.18823266                                                   | 46.48592846                                                   | 11491.65185                                                   |
| 0.056381644                                                  | 112.9259341                                                   | 8915.942341                                                   |
| 0.048519094                                                  | 93.5158858                                                    | 6435.694556                                                   |
| 0.074162279                                                  | 78.67213511                                                   | 5376.974406                                                   |
| 0.06187211                                                   | 66.16318644                                                   | 4827.551089                                                   |
| 0.363336662                                                  | 22.07536261                                                   | 2956.772101                                                   |
| 0.34354864                                                   | 19.21821531                                                   | 2429.605547                                                   |
| 0.092219961                                                  | 69.78725982                                                   | 4707.630506                                                   |
| 0.287581591                                                  | 25.64766373                                                   | 4940.862765                                                   |
| 0.233808551                                                  | 25.57547299                                                   | 2052.453197                                                   |
| 0.257883608                                                  | 29.21113557                                                   | 2898.351563                                                   |
| 0.121816974                                                  | 49.70944862                                                   | 4436.561012                                                   |
| 0.067167916                                                  | 91.28318625                                                   | 5518.939513                                                   |
| 0.030137004                                                  | 162.5429764                                                   | 7886.797383                                                   |
| 0.04683562                                                   | 126.4220964                                                   | 8821.868852                                                   |
| 0.073484869                                                  | 75.36652856                                                   | 7027.502534                                                   |
| 0.356696104                                                  | 25.16069415                                                   | 1559.431767                                                   |
| 0.116689454                                                  | 42.53883879                                                   | 6743.194255                                                   |
| 0.059207486                                                  | 94.53966415                                                   | 9955.509878                                                   |
| 0.092099985                                                  | 53.62990061                                                   | 11664.1943                                                    |
| 0.04976211                                                   | 101.2373033                                                   | 6679.503561                                                   |
| 0.072725828                                                  | 92.80952136                                                   | 7939.502122                                                   |
| 0.070849588                                                  | 81.32071125                                                   | 5238.485922                                                   |
| 0.07608759                                                   | 79.58956944                                                   | 9441.529176                                                   |
| 0.053266999                                                  | 114.4790232                                                   | 20461.7893                                                    |
| 0.082211744                                                  | 134.1111678                                                   | 20905.06937                                                   |
| 0.262403439                                                  | 15.48766068                                                   | 3574.46748                                                    |
| 0.088356112                                                  | 70.00031124                                                   | 3859.110867                                                   |
| 0.079370382                                                  | 69.45371145                                                   | 9941.407479                                                   |
| 0.043725932                                                  | 118.0322833                                                   | 4131.910008                                                   |
| 0.047895018                                                  | 97.6801479                                                    | 5551.038598                                                   |
| 0.051705594                                                  | 85.84251289                                                   | 6820.474277                                                   |
| 0.199202604                                                  | 36.41890116                                                   | 2945.752739                                                   |
| 0.069136143                                                  | 90.76296166                                                   | 6327.503097                                                   |
| 0.069337868                                                  | 82.07180712                                                   | 7353.606532                                                   |
| 0.645937885                                                  | 12.20938095                                                   | 2008.034443                                                   |
| 0.11693407                                                   | 50.04269914                                                   | 2922.763807                                                   |
| 0.47593455                                                   | 25.56216822                                                   | 2455.744083                                                   |
| 0.061958179                                                  | 83.14795865                                                   | 4992.941612                                                   |
| 0.052279931                                                  | 92.60524423                                                   | 4300.875111                                                   |
| 0.098347748                                                  | 51.79885516                                                   | 4669.306294                                                   |
| 0.21955608                                                   | 35.77990292                                                   | 1876.842391                                                   |
| 0.178328728                                                  | 43.59789546                                                   | 2602.619549                                                   |
| 0.043349701                                                  | 100.4940145                                                   | 10330.93282                                                   |
| 0.067785432                                                  | 77.27858586                                                   | 4625.633127                                                   |
| 0.092278176                                                  | 68.92826527                                                   | 8510.624349                                                   |
| 0.092184244                                                  | 50.98075314                                                   | 4768.678398                                                   |
| 0.067300898                                                  | 102.0836806                                                   | 12048.06759                                                   |
| 0.172998021                                                  | 47.24682069                                                   | 5584.937146                                                   |
| 0.068729264                                                  | 74.06718873                                                   | 6273.059925                                                   |
| 0.044085571                                                  | 132.5934521                                                   | 8981.639316                                                   |
| 0.053963674                                                  | 102.8043232                                                   | 8797.513971                                                   |
| 0.164926698                                                  | 31.39313734                                                   | 2886.236709                                                   |
| 0.070283425                                                  | 95.14121789                                                   | 13533.43889                                                   |
| 0.2114322                                                    | 26.69251288                                                   | 9293.365798                                                   |
| 0.044019996                                                  | 119.1163736                                                   | 10409.42704                                                   |
| 0.042216589                                                  | 108.8659822                                                   | 9396.210347                                                   |
| 0.158212694                                                  | 36.03213412                                                   | 5427.47274                                                    |
| 0.07696766                                                   | 65.70657761                                                   | 6573.622017                                                   |
| 0.063496353                                                  | 94.31341461                                                   | 9113.102797                                                   |
| 0.051933875                                                  | 97.84834363                                                   | 9800.468627                                                   |
| 0.048638124                                                  | 88.33562736                                                   | 5037.716246                                                   |
| 0.085016665                                                  | 75.03054811                                                   | 3568.552859                                                   |
| 0.087437305                                                  | 51.3924758                                                    | 6847.580477                                                   |
| 0.196786935                                                  | 28.78533553                                                   | 4178.15985                                                    |
| 0.265134819                                                  | 32.67477018                                                   | 3957.390397                                                   |
| 0.145673478                                                  | 39.4729033                                                    | 4005.966022                                                   |
| 0.034094752                                                  | 129.6964804                                                   | 7268.943138                                                   |
| 0.037923042                                                  | 161.1946472                                                   | 8088.715435                                                   |
| 0.143808372                                                  | 51.59663956                                                   | 5697.834352                                                   |
| 0.065146235                                                  | 86.58198057                                                   | 7763.556745                                                   |
| 0.125015387                                                  | 37.30296503                                                   | 5589.453303                                                   |
| 0.058330427                                                  | 92.09320029                                                   | 5551.97991                                                    |
| 0.261883139                                                  | 21.95095581                                                   | 6086.037859                                                   |
| 0.066853389                                                  | 83.11819175                                                   | 7617.813417                                                   |
| 0.107435521                                                  | 74.38177959                                                   | 5914.907002                                                   |
| 0.145839284                                                  | 40.04401143                                                   | 4207.708333                                                   |
| 0.093982429                                                  | 54.64715916                                                   | 7665.04                                                       |
| 1.05566026                                                   | 17.42419949                                                   | 2379.185583                                                   |
| 0.105582464                                                  | 62.42164629                                                   | 3341.409932                                                   |
| 0.044374267                                                  | 105.0719511                                                   | 8913.527301                                                   |
| 0.067548895                                                  | 83.94135756                                                   | 7801.341818                                                   |
| 0.085010285                                                  | 52.11721759                                                   | 4129.193704                                                   |
| 0.070809468                                                  | 115.185246                                                    | 11442.63501                                                   |
| 0.139509636                                                  | 46.20225558                                                   | 3912.336528                                                   |
| 0.085002348                                                  | 60.92441358                                                   | 14232.51767                                                   |
| 0.191626964                                                  | 22.22183979                                                   | 4667.7506                                                     |
| 0.115920074                                                  | 58.68942784                                                   | 5563.318497                                                   |

| log.sigma.3.5.mm.3D_gldm_SmallDependenceLowGrayLevelEmphasis | log.sigma.3.5.mm.3D_gldm_LowGrayLevelEmphasis | log.sigma.3.5.mm.3D_gldm_DistanceZoneVariabilityNormalized |
|--------------------------------------------------------------|-----------------------------------------------|------------------------------------------------------------|
| 0.001809249                                                  | 0.003435309                                   | 0.997524756                                                |
| 0.003526008                                                  | 0.017722037                                   | 1                                                          |
| 0.002583987                                                  | 0.008838973                                   | 1                                                          |
| 0.004151836                                                  | 0.007758325                                   | 1                                                          |
| 0.002015408                                                  | 0.00590511                                    | 1                                                          |
| 0.00392508                                                   | 0.014880722                                   | 1                                                          |
| 0.001132841                                                  | 0.004084753                                   | 1                                                          |
| 0.000770895                                                  | 0.002607366                                   | 1                                                          |
| 0.000932165                                                  | 0.002937507                                   | 1                                                          |
| 0.001615707                                                  | 0.003150066                                   | 1                                                          |
| 0.003133899                                                  | 0.01086858                                    | 1                                                          |
| 0.00184274                                                   | 0.004447119                                   | 0.996884743                                                |
| 0.001542605                                                  | 0.005351068                                   | 1                                                          |
| 0.001928309                                                  | 0.004918787                                   | 1                                                          |
| 0.001499248                                                  | 0.004612248                                   | 1                                                          |
| 0.001429807                                                  | 0.004652179                                   | 1                                                          |
| 0.002732072                                                  | 0.006417708                                   | 1                                                          |
| 0.004076317                                                  | 0.015325469                                   | 1                                                          |
| 0.003546407                                                  | 0.014390412                                   | 1                                                          |
| 0.001604016                                                  | 0.005627384                                   | 1                                                          |
| 0.001950153                                                  | 0.009574147                                   | 1                                                          |
| 0.004106468                                                  | 0.015006791                                   | 1                                                          |
| 0.003417756                                                  | 0.013566798                                   | 1                                                          |
| 0.002074389                                                  | 0.006682952                                   | 1                                                          |
| 0.003073841                                                  | 0.006106879                                   | 1                                                          |
| 0.001378678                                                  | 0.003008097                                   | 1                                                          |
| 0.001216938                                                  | 0.003386031                                   | 1                                                          |
| 0.001387766                                                  | 0.004148189                                   | 1                                                          |
| 0.003898108                                                  | 0.019827222                                   | 1                                                          |
| 0.001639472                                                  | 0.005486163                                   | 1                                                          |
| 0.000888556                                                  | 0.002930654                                   | 1                                                          |
| 0.001659874                                                  | 0.005091968                                   | 1                                                          |
| 0.001386956                                                  | 0.004339209                                   | 0.99596369                                                 |
| 0.002077111                                                  | 0.00541066                                    | 1                                                          |
| 0.001235382                                                  | 0.004981565                                   | 0.995133849                                                |
| 0.00088433                                                   | 0.003714878                                   | 1                                                          |
| 0.000671774                                                  | 0.002079133                                   | 1                                                          |
| 0.000668235                                                  | 0.002256237                                   | 0.993506562                                                |
| 0.002630306                                                  | 0.013183577                                   | 1                                                          |
| 0.001863514                                                  | 0.006680104                                   | 0.999080037                                                |
| 0.001423843                                                  | 0.005079137                                   | 1                                                          |
| 0.001514102                                                  | 0.004223085                                   | 0.998608212                                                |
| 0.001314896                                                  | 0.003773672                                   | 1                                                          |
| 0.001497705                                                  | 0.004004548                                   | 1                                                          |
| 0.003191336                                                  | 0.011025097                                   | 1                                                          |
| 0.001665583                                                  | 0.004758873                                   | 1                                                          |
| 0.001134854                                                  | 0.003676334                                   | 1                                                          |
| 0.004669556                                                  | 0.025657846                                   | 1                                                          |
| 0.003412912                                                  | 0.010161308                                   | 1                                                          |
| 0.004207036                                                  | 0.017280867                                   | 0.993421124                                                |
| 0.002291512                                                  | 0.006233987                                   | 1                                                          |
| 0.001710317                                                  | 0.004863051                                   | 0.99825175                                                 |
| 0.001791582                                                  | 0.005959146                                   | 0.998178508                                                |
| 0.006123294                                                  | 0.017970441                                   | 1                                                          |
| 0.003225972                                                  | 0.011494689                                   | 1                                                          |
| 0.001155717                                                  | 0.002900942                                   | 1                                                          |
| 0.002548125                                                  | 0.006412181                                   | 1                                                          |
| 0.001551969                                                  | 0.006408887                                   | 1                                                          |
| 0.003548111                                                  | 0.007914302                                   | 1                                                          |
| 0.000768076                                                  | 0.002693221                                   | 0.997357997                                                |
| 0.002117316                                                  | 0.006878195                                   | 1                                                          |
| 0.001426738                                                  | 0.004239112                                   | 1                                                          |
| 0.000813917                                                  | 0.002864251                                   | 0.996549752                                                |
| 0.000707461                                                  | 0.002787932                                   | 0.992152588                                                |
| 0.003113004                                                  | 0.010334536                                   | 1                                                          |
| 0.000829559                                                  | 0.002893494                                   | 0.994818688                                                |
| 0.001417814                                                  | 0.00811416                                    | 1                                                          |
| 0.000696586                                                  | 0.00268458                                    | 0.997549023                                                |
| 0.001041765                                                  | 0.002829363                                   | 1                                                          |
| 0.001476853                                                  | 0.006695473                                   | 1                                                          |
| 0.001617665                                                  | 0.006159745                                   | 1                                                          |
| 0.001065585                                                  | 0.003331646                                   | 0.993896293                                                |
| 0.001258378                                                  | 0.003864414                                   | 1                                                          |
| 0.00305197                                                   | 0.006111884                                   | 0.997435902                                                |
| 0.002071485                                                  | 0.006695609                                   | 0.995884791                                                |
| 0.002968683                                                  | 0.007692856                                   | 1                                                          |
| 0.002412327                                                  | 0.008655094                                   | 1                                                          |
| 0.002479223                                                  | 0.012214714                                   | 1                                                          |
| 0.002164022                                                  | 0.008639795                                   | 1                                                          |
| 0.001836625                                                  | 0.004031291                                   | 1                                                          |
| 0.002142867                                                  | 0.004180107                                   | 1                                                          |
| 0.002736749                                                  | 0.009072865                                   | 1                                                          |
| 0.001094282                                                  | 0.003632674                                   | 0.99743261                                                 |
| 0.001438083                                                  | 0.007069514                                   | 1                                                          |
| 0.001646744                                                  | 0.004785913                                   | 0.997333338                                                |
| 0.001514348                                                  | 0.00764464                                    | 1                                                          |
| 0.00282504                                                   | 0.006072749                                   | 1                                                          |
| 0.001556907                                                  | 0.005530608                                   | 1                                                          |
| 0.002748842                                                  | 0.009143464                                   | 1                                                          |
| 0.002250977                                                  | 0.00565228                                    | 1                                                          |
| 0.004424769                                                  | 0.022828445                                   | 1                                                          |
| 0.003779032                                                  | 0.009640124                                   | 0.997527816                                                |
| 0.001025711                                                  | 0.003081595                                   | 0.994386009                                                |
| 0.001477535                                                  | 0.003978157                                   | 1                                                          |
| 0.002219311                                                  | 0.006760333                                   | 0.998254801                                                |
| 0.001213537                                                  | 0.003735908                                   | 0.997860965                                                |
| 0.002803161                                                  | 0.009266499                                   | 1                                                          |
| 0.002105213                                                  | 0.004633154                                   | 1                                                          |
| 0.003264306                                                  | 0.009773502                                   | 1                                                          |
| 0.00136917                                                   | 0.005106963                                   | 1                                                          |

| log.sigma.3.5.mm.3D_gldzm_LowIntensityEmphasis | log.sigma.3.5.mm.3D_gldzm_LargeDistanceEmphasis | log.sigma.3.5.mm.3D_gldzm_HighIntensitySmallDistanceEmphasis |
|------------------------------------------------|-------------------------------------------------|--------------------------------------------------------------|
| 0.005309564                                    | 1.003717472                                     | 537.3162949                                                  |
| 0.025156553                                    | 1                                               | 122.7103825                                                  |
| 0.013720173                                    | 1                                               | 206.7065868                                                  |
| 0.013759186                                    | 1                                               | 311.4565217                                                  |
| 0.009197104                                    | 1                                               | 255.5856164                                                  |
| 0.017584824                                    | 1                                               | 192.77                                                       |
| 0.005065114                                    | 1                                               | 364.3819683                                                  |
| 0.003674483                                    | 1                                               | 536.4413502                                                  |
| 0.004031844                                    | 1                                               | 449.3610197                                                  |
| 0.00569413                                     | 1                                               | 569.4294479                                                  |
| 0.015060554                                    | 1                                               | 150.537234                                                   |
| 0.007225234                                    | 1.004680187                                     | 357.9177067                                                  |
| 0.010134114                                    | 1                                               | 312.5341615                                                  |
| 0.008707706                                    | 1                                               | 473.6901709                                                  |
| 0.006527388                                    | 1                                               | 363.6233553                                                  |
| 0.006236292                                    | 1                                               | 351.1077058                                                  |
| 0.010787949                                    | 1                                               | 271.2840909                                                  |
| 0.024486686                                    | 1                                               | 132.7639485                                                  |
| 0.020079571                                    | 1                                               | 113.556391                                                   |
| 0.007139002                                    | 1                                               | 310.8826494                                                  |
| 0.014932843                                    | 1                                               | 184.2055085                                                  |
| 0.020801716                                    | 1                                               | 131.296748                                                   |
| 0.017720433                                    | 1                                               | 156.3198198                                                  |
| 0.009388449                                    | 1                                               | 232.320059                                                   |
| 0.011188707                                    | 1                                               | 359.403183                                                   |
| 0.0045709                                      | 1                                               | 570.6683292                                                  |
| 0.004868313                                    | 1                                               | 506.3428875                                                  |
| 0.006036247                                    | 1                                               | 340.4311544                                                  |
| 0.022641015                                    | 1                                               | 123.8108108                                                  |
| 0.009619919                                    | 1                                               | 254.7963918                                                  |
| 0.004183908                                    | 1                                               | 461.9068716                                                  |
| 0.01123763                                     | 1                                               | 314.0208333                                                  |
| 0.005779938                                    | 1.006066734                                     | 394.8384732                                                  |
| 0.008654222                                    | 1                                               | 372.494964                                                   |
| 0.005849528                                    | 1.007317073                                     | 337.4794715                                                  |
| 0.00538379                                     | 1                                               | 421.5820433                                                  |
| 0.003683923                                    | 1                                               | 640.264177                                                   |
| 0.003136285                                    | 1.009771987                                     | 634.7609935                                                  |
| 0.022479521                                    | 1                                               | 110.0680628                                                  |
| 0.007622538                                    | 1.00138058                                      | 284.8370916                                                  |
| 0.008066286                                    | 1                                               | 337.1734861                                                  |
| 0.004863164                                    | 1.002089136                                     | 384.4569986                                                  |
| 0.005014774                                    | 1                                               | 384.261302                                                   |
| 0.005971582                                    | 1                                               | 347.9705882                                                  |
| 0.014937351                                    | 1                                               | 181.616129                                                   |
| 0.006569865                                    | 1                                               | 363.1089351                                                  |
| 0.005212949                                    | 1                                               | 398.5373537                                                  |
| 0.039661121                                    | 1                                               | 95.46206897                                                  |
| 0.014076642                                    | 1                                               | 209.9836066                                                  |
| 0.023249586                                    | 1.00990099                                      | 142.0470297                                                  |
| 0.009563762                                    | 1                                               | 327.006502                                                   |
| 0.006055254                                    | 1.002624672                                     | 331.7410324                                                  |
| 0.008376735                                    | 1.002734731                                     | 244.8653145                                                  |
| 0.025446917                                    | 1                                               | 153.1884984                                                  |
| 0.014627408                                    | 1                                               | 184.0564103                                                  |
| 0.005462863                                    | 1                                               | 506.4977477                                                  |
| 0.009732552                                    | 1                                               | 302.2165605                                                  |
| 0.009942018                                    | 1                                               | 349.3465982                                                  |
| 0.015684923                                    | 1                                               | 236.8830549                                                  |
| 0.003548938                                    | 1.003968254                                     | 476.1452822                                                  |
| 0.010287077                                    | 1                                               | 251.2348485                                                  |
| 0.006330626                                    | 1                                               | 346.1464873                                                  |
| 0.003502017                                    | 1.005184332                                     | 521.4742224                                                  |
| 0.003442493                                    | 1.01181767                                      | 516.7056837                                                  |
| 0.015637199                                    | 1                                               | 170.6722222                                                  |
| 0.004706424                                    | 1.007792208                                     | 531.3837662                                                  |
| 0.015403518                                    | 1                                               | 207.4594595                                                  |
| 0.00339263                                     | 1.003680982                                     | 533.7920245                                                  |
| 0.004092032                                    | 1                                               | 441.9946333                                                  |
| 0.009882018                                    | 1                                               | 223.8364662                                                  |
| 0.009667337                                    | 1                                               | 326                                                          |
| 0.005186709                                    | 1.009183673                                     | 463.8563776                                                  |
| 0.006499123                                    | 1                                               | 467.7635727                                                  |
| 0.009958613                                    | 1.003851091                                     | 313.3636072                                                  |
| 0.008022693                                    | 1.006185567                                     | 284.6095361                                                  |
| 0.0150668                                      | 1                                               | 251.0993976                                                  |
| 0.013891252                                    | 1                                               | 178.2795699                                                  |
| 0.017436655                                    | 1                                               | 198.8497409                                                  |
| 0.012275678                                    | 1                                               | 202.5583756                                                  |
| 0.006201922                                    | 1                                               | 461.3757881                                                  |
| 0.00617103                                     | 1                                               | 497.4813385                                                  |
| 0.013587702                                    | 1                                               | 238.1453362                                                  |
| 0.005322436                                    | 1.003856041                                     | 412.1905527                                                  |
| 0.010052181                                    | 1                                               | 225.6054889                                                  |
| 0.006321959                                    | 1.00400534                                      | 349.2633511                                                  |
| 0.013947972                                    | 1                                               | 192.1213873                                                  |
| 0.010622821                                    | 1                                               | 331.2334254                                                  |
| 0.007017203                                    | 1                                               | 311.4018568                                                  |
| 0.014139736                                    | 1                                               | 199.3169399                                                  |
| 0.011738215                                    | 1                                               | 301.0046296                                                  |
| 0.027959304                                    | 1                                               | 118.4954545                                                  |
| 0.01349208                                     | 1.003712871                                     | 228.0284653                                                  |
| 0.004368974                                    | 1.008444757                                     | 456.1972203                                                  |
| 0.00617811                                     | 1                                               | 367.8937143                                                  |
| 0.009993589                                    | 1.002620087                                     | 235.1364629                                                  |
| 0.005436072                                    | 1.003211991                                     | 482.1255353                                                  |
| 0.01267879                                     | 1                                               | 214.3564626                                                  |
| 0.011201461                                    | 1                                               | 355.7725118                                                  |
| 0.019795504                                    | 1                                               | 142.1052632                                                  |
| 0.006581519                                    | 1                                               | 293.8825301                                                  |

| log.sigma.3.5.mm.3D_gldzm_LowIntensityLargeDistanceEmphasis | log.sigma.3.5.mm.3D_gldzm_HighIntensityEmphasis | log.sigma.3.5.mm.3D_gldzm_DistanceZoneVariability | log.sigma.3.5.mm.3D_gldzm_ZonePercentage |
|-------------------------------------------------------------|-------------------------------------------------|---------------------------------------------------|------------------------------------------|
| 0.005314664                                                 | 537.9938042                                     | 805.0024783                                       | 0.380301602                              |
| 0.025156553                                                 | 122.7103825                                     | 183                                               | 0.195721925                              |
| 0.013720173                                                 | 206.7065868                                     | 334                                               | 0.217731421                              |
| 0.013759186                                                 | 311.4565217                                     | 322                                               | 0.329580348                              |
| 0.009197104                                                 | 255.5856164                                     | 584                                               | 0.246621622                              |
| 0.017584824                                                 | 192.77                                          | 200                                               | 0.303030303                              |
| 0.005065114                                                 | 364.3819683                                     | 1453                                              | 0.257122633                              |
| 0.003674483                                                 | 536.4413502                                     | 1185                                              | 0.231989037                              |
| 0.004031844                                                 | 449.3610197                                     | 1216                                              | 0.267487901                              |
| 0.00569413                                                  | 569.4294479                                     | 326                                               | 0.304104478                              |
| 0.015060554                                                 | 150.537234                                      | 376                                               | 0.24933687                               |
| 0.007263914                                                 | 358.0592824                                     | 639.0031201                                       | 0.278091106                              |
| 0.010134114                                                 | 312.5341615                                     | 322                                               | 0.172469202                              |
| 0.008707706                                                 | 473.6901709                                     | 468                                               | 0.272568433                              |
| 0.006527388                                                 | 363.6233553                                     | 608                                               | 0.306451613                              |
| 0.006236292                                                 | 351.1077058                                     | 1142                                              | 0.260968921                              |
| 0.010787949                                                 | 271.2840909                                     | 352                                               | 0.29480737                               |
| 0.024486686                                                 | 132.7639485                                     | 233                                               | 0.188969992                              |
| 0.020079571                                                 | 113.556391                                      | 266                                               | 0.204930663                              |
| 0.007139002                                                 | 310.8826494                                     | 1389                                              | 0.267166763                              |
| 0.014932843                                                 | 184.2055085                                     | 472                                               | 0.156084656                              |
| 0.020801716                                                 | 131.296748                                      | 246                                               | 0.227988879                              |
| 0.017720433                                                 | 156.3198198                                     | 222                                               | 0.216796875                              |
| 0.009388449                                                 | 232.320059                                      | 678                                               | 0.256139025                              |
| 0.011188707                                                 | 359.403183                                      | 377                                               | 0.296150825                              |
| 0.0045709                                                   | 570.6683292                                     | 802                                               | 0.338539468                              |
| 0.004868313                                                 | 506.3428875                                     | 942                                               | 0.291370244                              |
| 0.006036247                                                 | 340.4311544                                     | 719                                               | 0.26031861                               |
| 0.022641015                                                 | 123.8108108                                     | 111                                               | 0.248322148                              |
| 0.009619919                                                 | 254.7963918                                     | 388                                               | 0.188899708                              |
| 0.004183908                                                 | 461.9068716                                     | 1106                                              | 0.232450609                              |
| 0.01123763                                                  | 314.0208333                                     | 384                                               | 0.185596907                              |
| 0.005985533                                                 | 394.8847321                                     | 985.008089                                        | 0.306286776                              |
| 0.008654222                                                 | 372.494964                                      | 695                                               | 0.295744681                              |
| 0.005875564                                                 | 338.0130081                                     | 1224.014634                                       | 0.279291553                              |
| 0.00538379                                                  | 421.5820433                                     | 646                                               | 0.215405135                              |
| 0.003683923                                                 | 640.264177                                      | 723                                               | 0.194302607                              |
| 0.0031514                                                   | 636.3526059                                     | 1220.026059                                       | 0.237938384                              |
| 0.022479521                                                 | 110.0680628                                     | 191                                               | 0.155284553                              |
| 0.007632126                                                 | 284.8867925                                     | 2171.00092                                        | 0.298899587                              |
| 0.008066286                                                 | 337.1734861                                     | 611                                               | 0.235543562                              |
| 0.004872449                                                 | 384.5745125                                     | 1434.001393                                       | 0.371347298                              |
| 0.005014774                                                 | 384.261302                                      | 1106                                              | 0.302764851                              |
| 0.005971582                                                 | 347.9705882                                     | 714                                               | 0.286977492                              |
| 0.014937351                                                 | 181.616129                                      | 310                                               | 0.24256651                               |
| 0.006569865                                                 | 363.1089351                                     | 817                                               | 0.297632058                              |
| 0.005212949                                                 | 398.5373537                                     | 1111                                              | 0.243533538                              |
| 0.039661121                                                 | 95.46206897                                     | 145                                               | 0.166475316                              |
| 0.014076642                                                 | 209.9836066                                     | 244                                               | 0.286721504                              |
| 0.023451647                                                 | 142.1683168                                     | 301.0066007                                       | 0.224112426                              |
| 0.009563762                                                 | 327.006502                                      | 769                                               | 0.299338264                              |
| 0.006061816                                                 | 332.0034996                                     | 1141.00175                                        | 0.339068526                              |
| 0.008392917                                                 | 244.9808569                                     | 1095.001823                                       | 0.243129433                              |
| 0.025446917                                                 | 153.1884984                                     | 313                                               | 0.283514493                              |
| 0.014627408                                                 | 184.0564103                                     | 390                                               | 0.293233083                              |
| 0.005462863                                                 | 506.4977477                                     | 444                                               | 0.227692308                              |
| 0.009732552                                                 | 302.2165605                                     | 1256                                              | 0.310506799                              |
| 0.009942018                                                 | 349.3465982                                     | 779                                               | 0.225274725                              |
| 0.015684923                                                 | 236.8830549                                     | 419                                               | 0.254247573                              |
| 0.003564648                                                 | 476.4290123                                     | 2262.007937                                       | 0.24843904                               |
| 0.010287077                                                 | 251.2348485                                     | 396                                               | 0.224235561                              |
| 0.006330626                                                 | 346.1464873                                     | 669                                               | 0.250561798                              |
| 0.003576346                                                 | 522.0725806                                     | 1730.010369                                       | 0.299879081                              |
| 0.003484701                                                 | 517.6291503                                     | 1763.055149                                       | 0.233110324                              |
| 0.015637199                                                 | 170.6722222                                     | 180                                               | 0.227848101                              |
| 0.004729085                                                 | 532.312987                                      | 766.0103896                                       | 0.19937856                               |
| 0.015403518                                                 | 207.4594595                                     | 185                                               | 0.141871166                              |
| 0.003399028                                                 | 534.4472393                                     | 1626.004908                                       | 0.2608                                   |
| 0.004092032                                                 | 441.9946333                                     | 1677                                              | 0.286324057                              |
| 0.009882018                                                 | 223.8364662                                     | 532                                               | 0.183574879                              |
| 0.009667337                                                 | 326                                             | 308                                               | 0.237105466                              |
| 0.005236059                                                 | 464.2857143                                     | 974.0183673                                       | 0.228438228                              |
| 0.006499123                                                 | 467.7635727                                     | 571                                               | 0.250548486                              |
| 0.00999044                                                  | 313.4801027                                     | 777.0025674                                       | 0.344842851                              |
| 0.008054872                                                 | 284.9443299                                     | 966.0082474                                       | 0.309805174                              |
| 0.0150668                                                   | 251.0993976                                     | 332                                               | 0.247391952                              |
| 0.013891252                                                 | 178.2795699                                     | 465                                               | 0.194073456                              |
| 0.017436655                                                 | 198.8497409                                     | 193                                               | 0.201461378                              |
| 0.012275678                                                 | 202.5583756                                     | 394                                               | 0.230814294                              |
| 0.006201922                                                 | 461.3757881                                     | 793                                               | 0.339033775                              |
| 0.00617103                                                  | 497.4813385                                     | 777                                               | 0.390648567                              |
| 0.013587702                                                 | 238.1453362                                     | 461                                               | 0.256253474                              |
| 0.005333117                                                 | 412.5385604                                     | 776.0025707                                       | 0.23799327                               |
| 0.010052181                                                 | 225.6054889                                     | 583                                               | 0.189716889                              |
| 0.006329531                                                 | 349.7930574                                     | 747.0026702                                       | 0.307093071                              |
| 0.013947972                                                 | 192.1213873                                     | 173                                               | 0.112924282                              |
| 0.010622821                                                 | 331.2334254                                     | 724                                               | 0.303563941                              |
| 0.007017203                                                 | 311.4018568                                     | 754                                               | 0.274981765                              |
| 0.014139736                                                 | 199.3169399                                     | 366                                               | 0.25                                     |
| 0.011738215                                                 | 301.0046296                                     | 432                                               | 0.213333333                              |
| 0.027959304                                                 | 118.4954545                                     | 220                                               | 0.168711656                              |
| 0.013529209                                                 | 228.1212871                                     | 806.0024752                                       | 0.339210747                              |
| 0.004413363                                                 | 456.8289937                                     | 1413.022519                                       | 0.274165541                              |
| 0.00617811                                                  | 367.8937143                                     | 875                                               | 0.265151515                              |
| 0.010098393                                                 | 235.1528384                                     | 1143.001747                                       | 0.263097426                              |
| 0.005442143                                                 | 482.5503212                                     | 932.0021413                                       | 0.272939801                              |
| 0.01267879                                                  | 214.3564626                                     | 735                                               | 0.260915868                              |
| 0.011201461                                                 | 355.7725118                                     | 211                                               | 0.201528176                              |
| 0.019795504                                                 | 142.1052632                                     | 152                                               | 0.182254197                              |
| 0.006581519                                                 | 293.8825301                                     | 1328                                              | 0.229996536                              |



| log.sigma.3.5.mm.3D_gldzm_IntensityVariabilityNormalized | log.sigma.3.5.mm.3D_gldzm_LowIntensitySmallDistanceEmphasis | log.sigma.3.5.mm.3D_gldzm_IntensityVariability |
|----------------------------------------------------------|-------------------------------------------------------------|------------------------------------------------|
| 0.042307934                                              | 0.00530829                                                  | 34.1425031                                     |
| 0.068649407                                              | 0.025156553                                                 | 12.56284153                                    |
| 0.057280648                                              | 0.013720173                                                 | 19.13173653                                    |
| 0.050518884                                              | 0.013759186                                                 | 16.26708075                                    |
| 0.061116063                                              | 0.009197104                                                 | 35.69178082                                    |
| 0.05415                                                  | 0.017584824                                                 | 10.83                                          |
| 0.05559137                                               | 0.005065114                                                 | 80.77426015                                    |
| 0.048340544                                              | 0.003674483                                                 | 57.2835443                                     |
| 0.056172632                                              | 0.004031844                                                 | 68.30592105                                    |
| 0.054650156                                              | 0.00569413                                                  | 17.81595092                                    |
| 0.071115324                                              | 0.015060554                                                 | 26.7393617                                     |
| 0.053784429                                              | 0.007215565                                                 | 34.47581903                                    |
| 0.052582848                                              | 0.010134114                                                 | 16.93167702                                    |
| 0.045894514                                              | 0.008707706                                                 | 21.47863248                                    |
| 0.049217668                                              | 0.006527388                                                 | 29.92434211                                    |
| 0.053056211                                              | 0.006236292                                                 | 60.59019264                                    |
| 0.058690599                                              | 0.010787949                                                 | 20.65909091                                    |
| 0.061614692                                              | 0.024486686                                                 | 14.35622318                                    |
| 0.083328622                                              | 0.020079571                                                 | 22.16541353                                    |
| 0.050873338                                              | 0.007139002                                                 | 70.66306695                                    |
| 0.062491023                                              | 0.014932843                                                 | 29.49576271                                    |
| 0.07098949                                               | 0.020801716                                                 | 17.46341463                                    |
| 0.064158753                                              | 0.017720433                                                 | 14.24324324                                    |
| 0.062055673                                              | 0.009388449                                                 | 42.07374631                                    |
| 0.054520893                                              | 0.011188707                                                 | 20.55437666                                    |
| 0.047512142                                              | 0.0045709                                                   | 38.10473815                                    |
| 0.045568673                                              | 0.004868313                                                 | 42.92569002                                    |
| 0.057789659                                              | 0.006036247                                                 | 41.55076495                                    |
| 0.081892704                                              | 0.022641015                                                 | 9.09090909                                     |
| 0.062945053                                              | 0.009619919                                                 | 24.42268041                                    |
| 0.054543849                                              | 0.004183908                                                 | 60.32549729                                    |
| 0.060492622                                              | 0.01123763                                                  | 23.22916667                                    |
| 0.048373361                                              | 0.00572854                                                  | 47.84125379                                    |
| 0.049295585                                              | 0.008654222                                                 | 34.26043165                                    |
| 0.058951682                                              | 0.005843019                                                 | 72.51056911                                    |
| 0.057630189                                              | 0.00538379                                                  | 37.22910217                                    |
| 0.048126276                                              | 0.003683923                                                 | 34.79529737                                    |
| 0.046910312                                              | 0.003132506                                                 | 57.60586319                                    |
| 0.086264083                                              | 0.022479521                                                 | 16.47643979                                    |
| 0.049261012                                              | 0.007620141                                                 | 107.0441786                                    |
| 0.051577597                                              | 0.008066286                                                 | 31.51391162                                    |
| 0.049568982                                              | 0.004860843                                                 | 71.1810585                                     |
| 0.054738415                                              | 0.005014774                                                 | 60.54068716                                    |
| 0.054782697                                              | 0.005971582                                                 | 39.11484594                                    |
| 0.060541103                                              | 0.014937351                                                 | 18.76774194                                    |
| 0.052430827                                              | 0.006569865                                                 | 42.83598531                                    |
| 0.05295138                                               | 0.005212949                                                 | 58.8289829                                     |
| 0.073388823                                              | 0.039661121                                                 | 10.64137931                                    |
| 0.058855146                                              | 0.014076642                                                 | 14.36065574                                    |
| 0.064427235                                              | 0.023199071                                                 | 19.52145215                                    |
| 0.05390785                                               | 0.009563762                                                 | 41.45513654                                    |
| 0.051636918                                              | 0.006053614                                                 | 59.02099738                                    |
| 0.058451449                                              | 0.00837269                                                  | 64.12123974                                    |
| 0.060396656                                              | 0.025446917                                                 | 18.90415335                                    |
| 0.061236029                                              | 0.014627408                                                 | 23.88205128                                    |
| 0.056783134                                              | 0.005462863                                                 | 25.21171171                                    |
| 0.051950637                                              | 0.009732552                                                 | 65.25                                          |
| 0.050080664                                              | 0.009942018                                                 | 39.01283697                                    |
| 0.057900103                                              | 0.015684923                                                 | 24.2601432                                     |
| 0.05365619                                               | 0.00354501                                                  | 121.6922399                                    |
| 0.05396133                                               | 0.010287077                                                 | 21.36868687                                    |
| 0.057603321                                              | 0.006330626                                                 | 38.53662182                                    |
| 0.056002994                                              | 0.003483435                                                 | 97.22119816                                    |
| 0.050190184                                              | 0.003431941                                                 | 89.18795723                                    |
| 0.066790123                                              | 0.015637199                                                 | 12.02222222                                    |
| 0.048649013                                              | 0.004700759                                                 | 37.45974026                                    |
| 0.072958364                                              | 0.015403518                                                 | 13.4972973                                     |
| 0.048738003                                              | 0.00339103                                                  | 79.44294479                                    |
| 0.052279445                                              | 0.004092032                                                 | 87.6726297                                     |
| 0.065570411                                              | 0.009882018                                                 | 34.88345865                                    |
| 0.060233598                                              | 0.009667337                                                 | 18.55194805                                    |
| 0.049562682                                              | 0.005174371                                                 | 48.57142857                                    |
| 0.051738892                                              | 0.006499123                                                 | 29.54290718                                    |
| 0.048264702                                              | 0.009950656                                                 | 37.59820282                                    |
| 0.052600701                                              | 0.008014648                                                 | 51.02268041                                    |
| 0.06287197                                               | 0.0150668                                                   | 20.87349398                                    |
| 0.066953405                                              | 0.013891252                                                 | 31.13333333                                    |
| 0.055008188                                              | 0.017436655                                                 | 10.61658031                                    |
| 0.062743178                                              | 0.012275678                                                 | 24.72081218                                    |
| 0.047978131                                              | 0.006201922                                                 | 38.04665826                                    |
| 0.042567112                                              | 0.00617103                                                  | 33.07464607                                    |
| 0.054418152                                              | 0.013587702                                                 | 25.0867679                                     |
| 0.052051599                                              | 0.005319765                                                 | 40.49614396                                    |
| 0.064588733                                              | 0.010052181                                                 | 37.65523156                                    |
| 0.049862656                                              | 0.006320067                                                 | 37.34712951                                    |
| 0.082562064                                              | 0.013947972                                                 | 14.28323699                                    |
| 0.048392143                                              | 0.010622821                                                 | 35.0359116                                     |
| 0.056716082                                              | 0.007017203                                                 | 42.76392573                                    |
| 0.061169339                                              | 0.014139736                                                 | 22.38797814                                    |
| 0.054023062                                              | 0.011738215                                                 | 23.33796296                                    |
| 0.073264463                                              | 0.027959304                                                 | 16.11818182                                    |
| 0.055012989                                              | 0.013482798                                                 | 44.45049505                                    |
| 0.051456463                                              | 0.004357876                                                 | 73.11963406                                    |
| 0.055370449                                              | 0.00617811                                                  | 48.44914286                                    |
| 0.058728857                                              | 0.009967388                                                 | 67.24454148                                    |
| 0.047700709                                              | 0.005434554                                                 | 44.55246253                                    |
| 0.054160766                                              | 0.01267879                                                  | 39.80816327                                    |
| 0.055097594                                              | 0.011201461                                                 | 11.62559242                                    |
| 0.077562327                                              | 0.019795504                                                 | 11.78947368                                    |
| 0.058933399                                              | 0.006581519                                                 | 78.26355422                                    |

| log.sigma.3.5.mm.3D_gldzm_HighIntensityLargeDistanceEmphasis | log.sigma.3.5.mm.3D_gldzm_SmallDistanceEmphasis | log.sigma.3.5.mm.3D_glcm_SumVariance | log.sigma.3.5.mm.3D_glcm_Homogeneity1 |
|--------------------------------------------------------------|-------------------------------------------------|--------------------------------------|---------------------------------------|
| 540.7038414                                                  | 0.999070632                                     | 1815.611792                          | 0.352004791                           |
| 122.7103825                                                  | 1                                               | 258.7397794                          | 0.477448535                           |
| 206.7065868                                                  | 1                                               | 533.3473201                          | 0.454305626                           |
| 311.4565217                                                  | 1                                               | 950.2325161                          | 0.377621027                           |
| 255.5856164                                                  | 1                                               | 776.9341359                          | 0.425583076                           |
| 192.77                                                       | 1                                               | 403.0953132                          | 0.411702275                           |
| 364.3819683                                                  | 1                                               | 988.9371426                          | 0.418613195                           |
| 536.4413502                                                  | 1                                               | 1577.462024                          | 0.430151742                           |
| 449.3610197                                                  | 1                                               | 1443.00217                           | 0.406457906                           |
| 569.4294479                                                  | 1                                               | 1819.457519                          | 0.41252538                            |
| 150.537234                                                   | 1                                               | 429.2429761                          | 0.452286644                           |
| 358.625585                                                   | 0.998829953                                     | 1073.638497                          | 0.41096587                            |
| 312.5341615                                                  | 1                                               | 875.0545353                          | 0.51250244                            |
| 473.6901709                                                  | 1                                               | 1470.95047                           | 0.408426516                           |
| 363.6233553                                                  | 1                                               | 1196.095703                          | 0.382523648                           |
| 351.1077058                                                  | 1                                               | 976.382145                           | 0.399085978                           |
| 271.2840909                                                  | 1                                               | 898.0024828                          | 0.400998237                           |
| 132.7639485                                                  | 1                                               | 301.6159325                          | 0.475927318                           |
| 113.556391                                                   | 1                                               | 276.1782202                          | 0.474396119                           |
| 310.8826494                                                  | 1                                               | 809.8026054                          | 0.409385477                           |
| 184.2055085                                                  | 1                                               | 439.9628286                          | 0.505654291                           |
| 131.296748                                                   | 1                                               | 312.2981463                          | 0.437943556                           |
| 156.3198198                                                  | 1                                               | 382.7449053                          | 0.451706702                           |
| 232.320059                                                   | 1                                               | 652.2201008                          | 0.442900973                           |
| 359.403183                                                   | 1                                               | 1058.057718                          | 0.398025357                           |
| 570.6683292                                                  | 1                                               | 1737.091528                          | 0.383746808                           |
| 506.3428875                                                  | 1                                               | 1538.645588                          | 0.394619854                           |
| 340.4311544                                                  | 1                                               | 1036.473878                          | 0.425984209                           |
| 123.8108108                                                  | 1                                               | 244.1498194                          | 0.454453379                           |
| 254.7963918                                                  | 1                                               | 746.8251557                          | 0.47672585                            |
| 461.9068716                                                  | 1                                               | 1403.239503                          | 0.42887202                            |
| 314.0208333                                                  | 1                                               | 1145.550354                          | 0.464971189                           |
| 395.0697674                                                  | 0.998483316                                     | 1231.196375                          | 0.385025378                           |
| 372.494964                                                   | 1                                               | 1207.813069                          | 0.400089593                           |
| 340.1471545                                                  | 0.998170732                                     | 973.5098242                          | 0.406316093                           |
| 421.5820433                                                  | 1                                               | 1281.341689                          | 0.44567911                            |
| 640.264177                                                   | 1                                               | 2155.735328                          | 0.465519502                           |
| 642.7190554                                                  | 0.997557003                                     | 1942.827757                          | 0.445625381                           |
| 110.0680628                                                  | 1                                               | 316.3234059                          | 0.493050236                           |
| 285.085596                                                   | 0.999654855                                     | 778.5174709                          | 0.383590035                           |
| 337.1734861                                                  | 1                                               | 1168.678554                          | 0.433057138                           |
| 385.0445682                                                  | 0.999477716                                     | 1093.106077                          | 0.351219734                           |
| 384.261302                                                   | 1                                               | 1187.838717                          | 0.380201149                           |
| 347.9705882                                                  | 1                                               | 1120.545453                          | 0.39846814                            |
| 181.616129                                                   | 1                                               | 406.3589077                          | 0.442574558                           |
| 363.1089351                                                  | 1                                               | 1102.367308                          | 0.406591748                           |
| 398.5373537                                                  | 1                                               | 1134.939412                          | 0.422710753                           |
| 95.46206897                                                  | 1                                               | 182.2556505                          | 0.504422016                           |
| 209.9836066                                                  | 1                                               | 525.577827                           | 0.413322856                           |
| 142.6534653                                                  | 0.997524752                                     | 276.7972828                          | 0.482399403                           |
| 327.006502                                                   | 1                                               | 1018.108805                          | 0.387060923                           |
| 333.0533683                                                  | 0.999343832                                     | 973.1528319                          | 0.364065187                           |
| 245.4430264                                                  | 0.999316317                                     | 706.3431795                          | 0.428823472                           |
| 153.1884984                                                  | 1                                               | 354.9420654                          | 0.401898223                           |
| 184.0564103                                                  | 1                                               | 474.4410442                          | 0.410092864                           |
| 506.4977477                                                  | 1                                               | 1592.179707                          | 0.432436329                           |
| 302.2165605                                                  | 1                                               | 905.9570713                          | 0.387452246                           |
| 349.3465982                                                  | 1                                               | 1145.836047                          | 0.430050681                           |
| 236.8830549                                                  | 1                                               | 732.8621398                          | 0.425202727                           |
| 477.563933                                                   | 0.999007937                                     | 1507.414988                          | 0.427538748                           |
| 251.2348485                                                  | 1                                               | 624.5225509                          | 0.468866119                           |
| 346.1464873                                                  | 1                                               | 1028.506606                          | 0.41981345                            |
| 524.4660138                                                  | 0.998703917                                     | 1618.950738                          | 0.407231086                           |
| 521.3230163                                                  | 0.997045582                                     | 1405.380473                          | 0.4267749                             |
| 170.6722222                                                  | 1                                               | 420.6175243                          | 0.436431299                           |
| 536.0298701                                                  | 0.998051948                                     | 1557.118945                          | 0.460595738                           |
| 207.4594595                                                  | 1                                               | 686.5626011                          | 0.517613599                           |
| 537.0680982                                                  | 0.999079755                                     | 1663.678773                          | 0.416789487                           |
| 441.9946333                                                  | 1                                               | 1545.935488                          | 0.427101407                           |
| 223.8364662                                                  | 1                                               | 617.4737443                          | 0.481887542                           |
| 326                                                          | 1                                               | 1045.66478                           | 0.420465066                           |
| 466.0030612                                                  | 0.997704082                                     | 1345.348858                          | 0.435534233                           |
| 467.7635727                                                  | 1                                               | 1529.107363                          | 0.422778651                           |
| 313.9460847                                                  | 0.999037227                                     | 1023.425354                          | 0.359763324                           |
| 286.2835052                                                  | 0.998453608                                     | 753.1263736                          | 0.3802011                             |
| 251.0993976                                                  | 1                                               | 868.9035986                          | 0.441496249                           |
| 178.2795699                                                  | 1                                               | 472.84892                            | 0.484435419                           |
| 198.8497409                                                  | 1                                               | 452.2575876                          | 0.473535907                           |
| 202.5583756                                                  | 1                                               | 524.3378016                          | 0.450759618                           |
| 461.3757881                                                  | 1                                               | 1540.869248                          | 0.364373017                           |
| 497.4813385                                                  | 1                                               | 1650.420874                          | 0.359167562                           |
| 238.1453362                                                  | 1                                               | 659.1991945                          | 0.439637378                           |
| 413.9305913                                                  | 0.99903599                                      | 1270.749796                          | 0.420484477                           |
| 225.6054889                                                  | 1                                               | 676.5087921                          | 0.459288816                           |
| 351.9118825                                                  | 0.998998665                                     | 1054.758863                          | 0.383180737                           |
| 192.1213873                                                  | 1                                               | 506.5649948                          | 0.524973135                           |
| 331.2334254                                                  | 1                                               | 1124.854711                          | 0.395415703                           |
| 311.4018568                                                  | 1                                               | 865.9381287                          | 0.431516782                           |
| 199.3169399                                                  | 1                                               | 555.1908877                          | 0.448011743                           |
| 301.0046296                                                  | 1                                               | 949.499519                           | 0.457205031                           |
| 118.4954545                                                  | 1                                               | 197.5366981                          | 0.527037735                           |
| 228.4925743                                                  | 0.999071782                                     | 661.8941393                          | 0.389164596                           |
| 459.3560873                                                  | 0.997888811                                     | 1460.393182                          | 0.408606021                           |
| 367.8937143                                                  | 1                                               | 1133.550813                          | 0.423921541                           |
| 235.2183406                                                  | 0.999344978                                     | 704.3695074                          | 0.409020555                           |
| 484.2494647                                                  | 0.999197002                                     | 1480.459287                          | 0.430194971                           |
| 214.3564626                                                  | 1                                               | 562.9157229                          | 0.428703429                           |
| 355.7725118                                                  | 1                                               | 1322.323769                          | 0.472883058                           |
| 142.1052632                                                  | 1                                               | 437.1215217                          | 0.491053493                           |
| 293.8825301                                                  | 1                                               | 784.5658152                          | 0.444063463                           |

| log.sigma.3.5.mm.3D_glc_m_Homogeneity2 | log.sigma.3.5.mm.3D_glc_m_ClusterShade | log.sigma.3.5.mm.3D_glc_m_MaximumProbability | log.sigma.3.5.mm.3D_glc_m_Idmn | log.sigma.3.5.mm.3D_glc_m_SumVariance2 |
|----------------------------------------|----------------------------------------|----------------------------------------------|--------------------------------|----------------------------------------|
| 0.267634945                            | -723.9216156                           | 0.021118125                                  | 0.982295009                    | 107.1107932                            |
| 0.412449186                            | 116.9032641                            | 0.055902496                                  | 0.983608624                    | 32.33998083                            |
| 0.384287644                            | 90.1970901                             | 0.026402164                                  | 0.988325682                    | 50.85476105                            |
| 0.2945999                              | -344.2663554                           | 0.018981846                                  | 0.982730467                    | 84.18581928                            |
| 0.349014731                            | -35.16529042                           | 0.028559922                                  | 0.985737541                    | 48.80455798                            |
| 0.332550192                            | 332.630498                             | 0.039599884                                  | 0.981730613                    | 67.23269343                            |
| 0.339962572                            | 158.0887205                            | 0.028908292                                  | 0.992934246                    | 55.78069785                            |
| 0.354462746                            | 108.0898729                            | 0.032269127                                  | 0.991640285                    | 57.04359431                            |
| 0.327240993                            | -38.70297652                           | 0.018655436                                  | 0.989505233                    | 61.17710195                            |
| 0.331835172                            | -273.1792372                           | 0.025902959                                  | 0.990561606                    | 61.39055424                            |
| 0.379786846                            | -4.350773707                           | 0.033376341                                  | 0.984339624                    | 36.80238789                            |
| 0.331374485                            | -34.92240445                           | 0.025782089                                  | 0.98979971                     | 60.55291129                            |
| 0.455997358                            | 135.8207754                            | 0.078478381                                  | 0.991415875                    | 46.77942124                            |
| 0.330994229                            | -162.2125146                           | 0.029961854                                  | 0.987283456                    | 68.70877753                            |
| 0.300409096                            | -113.0164365                           | 0.026276901                                  | 0.987270096                    | 63.04886967                            |
| 0.318137712                            | -28.88990522                           | 0.025528491                                  | 0.987375575                    | 63.33716898                            |
| 0.320382118                            | -322.7701437                           | 0.024764424                                  | 0.983595232                    | 51.89696759                            |
| 0.410933822                            | 234.3897074                            | 0.050878278                                  | 0.983825484                    | 41.95789462                            |
| 0.407005962                            | 64.91013336                            | 0.049117695                                  | 0.983507339                    | 29.52697762                            |
| 0.328781129                            | 71.41980434                            | 0.021800069                                  | 0.98943916                     | 65.16362696                            |
| 0.446196722                            | 94.90535034                            | 0.063976436                                  | 0.991462979                    | 35.30041262                            |
| 0.360590295                            | 27.24339123                            | 0.024500389                                  | 0.9819281                      | 36.15977855                            |
| 0.379524387                            | 106.2420694                            | 0.043714734                                  | 0.986182706                    | 44.41576675                            |
| 0.369470182                            | 103.6186178                            | 0.030107271                                  | 0.988121335                    | 41.81266966                            |
| 0.317618906                            | -25.30751828                           | 0.02698532                                   | 0.985437748                    | 48.17602873                            |
| 0.300823379                            | -258.5946316                           | 0.021440366                                  | 0.989945727                    | 79.43961265                            |
| 0.31452847                             | -305.7181446                           | 0.026299564                                  | 0.988658239                    | 83.04362012                            |
| 0.350297037                            | -24.34908884                           | 0.035341279                                  | 0.98893689                     | 46.93969085                            |
| 0.382540623                            | 129.8909882                            | 0.042990861                                  | 0.982207671                    | 36.3538577                             |
| 0.41036232                             | 13.72285286                            | 0.045727461                                  | 0.990364055                    | 34.16393004                            |
| 0.35477578                             | 11.73202142                            | 0.031880961                                  | 0.990308594                    | 54.02554423                            |
| 0.398707859                            | -309.6099029                           | 0.053837162                                  | 0.989326566                    | 34.12385671                            |
| 0.302823765                            | -250.7842223                           | 0.019786627                                  | 0.987101284                    | 82.07708958                            |
| 0.320194092                            | -323.7497739                           | 0.029733579                                  | 0.985300645                    | 67.95240915                            |
| 0.324542468                            | -91.20226152                           | 0.020371135                                  | 0.98808693                     | 53.98676486                            |
| 0.372715005                            | -86.65362933                           | 0.036505443                                  | 0.990484914                    | 44.74834547                            |
| 0.400286637                            | -287.0602372                           | 0.050683926                                  | 0.99314389                     | 51.7497339                             |
| 0.374377228                            | -161.602426                            | 0.063795879                                  | 0.992392362                    | 84.64356387                            |
| 0.42914147                             | -33.79240373                           | 0.043390944                                  | 0.982915847                    | 16.29285289                            |
| 0.298621582                            | 7.878260398                            | 0.013532094                                  | 0.986727202                    | 80.7726315                             |
| 0.361406939                            | -399.2579401                           | 0.044656466                                  | 0.987662127                    | 50.62380977                            |
| 0.262575201                            | 364.3098027                            | 0.01383806                                   | 0.987141385                    | 88.82731795                            |
| 0.29516755                             | -20.26585689                           | 0.018369001                                  | 0.986035264                    | 59.03491122                            |
| 0.319014815                            | 125.3509776                            | 0.02447648                                   | 0.990446936                    | 53.20790989                            |
| 0.367525275                            | 229.3099846                            | 0.037868044                                  | 0.987883824                    | 48.1974395                             |
| 0.327649431                            | -185.871709                            | 0.022452305                                  | 0.987194398                    | 60.04807716                            |
| 0.345819809                            | 71.90290789                            | 0.034204712                                  | 0.989656521                    | 48.25170434                            |
| 0.443065503                            | 106.5752224                            | 0.067608523                                  | 0.985638024                    | 29.61408765                            |
| 0.332852766                            | 91.93696425                            | 0.026091173                                  | 0.984067768                    | 55.36349828                            |
| 0.418596747                            | 214.0989448                            | 0.061267898                                  | 0.988405274                    | 42.76716016                            |
| 0.302651499                            | -165.4265626                           | 0.01686866                                   | 0.984735394                    | 62.72904786                            |
| 0.276694723                            | 53.13789092                            | 0.017876779                                  | 0.985567523                    | 68.94210655                            |
| 0.35158431                             | 46.05962208                            | 0.026774478                                  | 0.989291045                    | 46.96855121                            |
| 0.320385477                            | 112.1989303                            | 0.024588288                                  | 0.979591123                    | 45.50550894                            |
| 0.329918482                            | 112.4910839                            | 0.026878625                                  | 0.98021087                     | 57.79034377                            |
| 0.357143718                            | -47.30647951                           | 0.040814867                                  | 0.99230844                     | 44.32709421                            |
| 0.303122017                            | -132.3274188                           | 0.018032895                                  | 0.983394584                    | 65.14294168                            |
| 0.355499806                            | -411.0857655                           | 0.034952887                                  | 0.987579844                    | 57.91739843                            |
| 0.349101802                            | 50.99538809                            | 0.034709836                                  | 0.984482194                    | 36.23465751                            |
| 0.353027923                            | -29.84237778                           | 0.034493813                                  | 0.990535597                    | 62.33010391                            |
| 0.402642549                            | 330.2181186                            | 0.057363943                                  | 0.991001321                    | 49.82995946                            |
| 0.341152188                            | -34.07688246                           | 0.029760855                                  | 0.98980932                     | 53.15931085                            |
| 0.327836435                            | -66.66123216                           | 0.027836101                                  | 0.99071147                     | 64.64570497                            |
| 0.350693392                            | 301.3522607                            | 0.024267038                                  | 0.992383417                    | 62.5491277                             |
| 0.358793288                            | 70.79760274                            | 0.028930261                                  | 0.982880773                    | 36.06813747                            |
| 0.392521041                            | -39.44848138                           | 0.048664741                                  | 0.991917425                    | 54.06043534                            |
| 0.462069402                            | -24.41095129                           | 0.07845921                                   | 0.989033896                    | 23.90518828                            |
| 0.340687652                            | -31.53657921                           | 0.030035322                                  | 0.992431971                    | 67.95190056                            |
| 0.351078903                            | -189.3374712                           | 0.024535227                                  | 0.99162222                     | 53.90944933                            |
| 0.417238219                            | 26.89416972                            | 0.045550804                                  | 0.988730693                    | 31.21127415                            |
| 0.343468106                            | -279.7127953                           | 0.030295245                                  | 0.987121183                    | 51.52726154                            |
| 0.361958376                            | 115.6918545                            | 0.036788461                                  | 0.990941699                    | 62.68172281                            |
| 0.346527111                            | -367.9218987                           | 0.031316616                                  | 0.988943608                    | 55.93313092                            |
| 0.274001312                            | -335.1555511                           | 0.020645645                                  | 0.979602018                    | 71.14699958                            |
| 0.295375538                            | 173.5165637                            | 0.017314398                                  | 0.98605788                     | 76.70023341                            |
| 0.369700434                            | -327.2883027                           | 0.042015347                                  | 0.98395391                     | 46.6761332                             |
| 0.420162687                            | 50.73049622                            | 0.038681945                                  | 0.9887167                      | 29.38855615                            |
| 0.406147294                            | 270.6306329                            | 0.051901478                                  | 0.989369506                    | 50.59811604                            |
| 0.377620903                            | 39.20840083                            | 0.035140817                                  | 0.986414037                    | 37.13697184                            |
| 0.279246882                            | -987.4102418                           | 0.018080105                                  | 0.985165065                    | 104.0341539                            |
| 0.276135779                            | -898.3970704                           | 0.023035113                                  | 0.980953926                    | 108.7261643                            |
| 0.368186847                            | -89.78947321                           | 0.037344814                                  | 0.99010374                     | 42.91019574                            |
| 0.343017645                            | -1.034757725                           | 0.030036108                                  | 0.989181229                    | 53.99163006                            |
| 0.388235735                            | -177.0591013                           | 0.034592334                                  | 0.98941389                     | 42.11603875                            |
| 0.298769961                            | -99.76373786                           | 0.021703398                                  | 0.98901886                     | 75.32103454                            |
| 0.46889796                             | 134.6144215                            | 0.064484173                                  | 0.991132441                    | 33.55363527                            |
| 0.317769469                            | -576.3132481                           | 0.027581512                                  | 0.98256433                     | 75.5479762                             |
| 0.357310969                            | 37.6300567                             | 0.035641583                                  | 0.988487303                    | 55.11369061                            |
| 0.375430687                            | 10.80998702                            | 0.037162884                                  | 0.987508328                    | 44.68376304                            |
| 0.387624168                            | -98.02904186                           | 0.038359983                                  | 0.989816741                    | 47.52156269                            |
| 0.473401492                            | 217.2683216                            | 0.088074876                                  | 0.984212273                    | 40.28260147                            |
| 0.305129897                            | 72.48704774                            | 0.017575763                                  | 0.982419694                    | 72.74895342                            |
| 0.330666286                            | -276.831718                            | 0.022852982                                  | 0.989205361                    | 58.42037606                            |
| 0.348448676                            | -102.98769                             | 0.031313197                                  | 0.98826919                     | 48.59517236                            |
| 0.328514404                            | -90.9143672                            | 0.019969863                                  | 0.986646679                    | 49.0749084                             |
| 0.357251174                            | -174.6160281                           | 0.037642064                                  | 0.989434967                    | 76.15561808                            |
| 0.351476525                            | 30.85080746                            | 0.024834063                                  | 0.98707662                     | 62.93206229                            |
| 0.409954008                            | -726.5546834                           | 0.054180755                                  | 0.986969327                    | 57.17884081                            |
| 0.428553449                            | -40.04698022                           | 0.04150925                                   | 0.985952559                    | 26.41641065                            |
| 0.372431079                            | 139.328872                             | 0.040005219                                  | 0.987752793                    | 45.60643518                            |

| log.sigma.3.5.mm.3D_glc_m_Contrast | log.sigma.3.5.mm.3D_glc_m_DifferenceEntropy | log.sigma.3.5.mm.3D_glc_m_InverseVariance | log.sigma.3.5.mm.3D_glc_m_Entropy | log.sigma.3.5.mm.3D_glc_m_Dissimilarity |
|------------------------------------|---------------------------------------------|-------------------------------------------|-----------------------------------|-----------------------------------------|
| 27.56246098                        | 3.445199387                                 | 0.26225502                                | 8.282451449                       | 3.821980651                             |
| 7.069716728                        | 2.547667816                                 | 0.401751985                               | 6.502465737                       | 1.934436931                             |
| 8.971100915                        | 2.703471667                                 | 0.37618635                                | 7.205255774                       | 2.178877198                             |
| 19.16463369                        | 3.181698261                                 | 0.300388782                               | 7.822808065                       | 3.186214035                             |
| 11.98350312                        | 2.904326167                                 | 0.33929                                   | 7.389074292                       | 2.514514773                             |
| 13.32522407                        | 2.935935333                                 | 0.319533302                               | 7.22606258                        | 2.694320315                             |
| 11.67018194                        | 2.895239725                                 | 0.334631665                               | 7.524009005                       | 2.529862203                             |
| 11.29904914                        | 2.867528246                                 | 0.347469895                               | 7.436163277                       | 2.441329234                             |
| 14.27329244                        | 3.005065846                                 | 0.325557179                               | 7.742098832                       | 2.754912111                             |
| 12.7977998                         | 2.943033197                                 | 0.317751952                               | 7.346948509                       | 2.634139913                             |
| 8.037973137                        | 2.655449784                                 | 0.367458822                               | 6.952698652                       | 2.129625545                             |
| 12.29046104                        | 2.939996437                                 | 0.328739752                               | 7.55765362                        | 2.618707432                             |
| 8.211393062                        | 2.587260589                                 | 0.394110052                               | 6.554808704                       | 1.898154225                             |
| 16.85217769                        | 3.072666648                                 | 0.326089941                               | 7.559457333                       | 2.865197994                             |
| 18.41713069                        | 3.171525745                                 | 0.301896677                               | 7.684219697                       | 3.13581189                              |
| 14.52740019                        | 3.007409256                                 | 0.3180835                                 | 7.71155716                        | 2.812724035                             |
| 13.81606055                        | 2.973374507                                 | 0.328478771                               | 7.351433337                       | 2.742952046                             |
| 8.624806508                        | 2.643673884                                 | 0.388007218                               | 6.698675274                       | 2.053385706                             |
| 6.30161847                         | 2.49893371                                  | 0.396592136                               | 6.537643806                       | 1.892846889                             |
| 11.98824402                        | 2.927220901                                 | 0.325143497                               | 7.712575819                       | 2.608390571                             |
| 6.038523051                        | 2.459801674                                 | 0.411382141                               | 6.60489266                        | 1.747592209                             |
| 7.712428106                        | 2.620586723                                 | 0.362384072                               | 6.918033544                       | 2.144672802                             |
| 8.426432056                        | 2.684614638                                 | 0.368996438                               | 6.932646123                       | 2.153170186                             |
| 9.825232552                        | 2.780501704                                 | 0.357260798                               | 7.168555096                       | 2.294250058                             |
| 16.11515494                        | 3.04681279                                  | 0.318154306                               | 7.376438223                       | 2.889183119                             |
| 17.72612196                        | 3.147793917                                 | 0.302376434                               | 7.851099788                       | 3.072885036                             |
| 18.32883715                        | 3.14972284                                  | 0.308914364                               | 7.895859389                       | 3.042457425                             |
| 11.94076281                        | 2.90055568                                  | 0.345412936                               | 7.331442319                       | 2.510091878                             |
| 6.822674846                        | 2.52664041                                  | 0.389248745                               | 6.443985388                       | 2.003932842                             |
| 7.377756884                        | 2.584025363                                 | 0.38917153                                | 6.766184282                       | 1.963197972                             |
| 12.46438994                        | 2.911905693                                 | 0.349766713                               | 7.469164114                       | 2.528345653                             |
| 11.00042491                        | 2.775369899                                 | 0.375255315                               | 6.638300548                       | 2.254373728                             |
| 17.6615489                         | 3.155490105                                 | 0.301854113                               | 8.019109094                       | 3.083389168                             |
| 16.08525337                        | 3.092509217                                 | 0.308293991                               | 7.66606621                        | 2.920771496                             |
| 12.05381196                        | 2.91967173                                  | 0.325009962                               | 7.562480357                       | 2.609308319                             |
| 10.28471355                        | 2.778512349                                 | 0.357154535                               | 7.082919634                       | 2.297062266                             |
| 12.80519177                        | 2.83061889                                  | 0.370924884                               | 7.030635838                       | 2.348819911                             |
| 15.36754323                        | 3.03655569                                  | 0.310683642                               | 7.672548395                       | 2.689293063                             |
| 5.26830645                         | 2.390376479                                 | 0.410344398                               | 6.060487909                       | 1.726219128                             |
| 15.23188691                        | 3.077708702                                 | 0.299553921                               | 8.092371809                       | 2.943002843                             |
| 14.43381758                        | 2.958360935                                 | 0.35251839                                | 7.197328214                       | 2.614607116                             |
| 20.56030759                        | 3.262277998                                 | 0.271654472                               | 8.233078297                       | 3.436929444                             |
| 16.16806135                        | 3.078829637                                 | 0.301599898                               | 7.783814257                       | 2.99844036                              |
| 16.00068786                        | 3.084130672                                 | 0.320284849                               | 7.579102696                       | 2.900532567                             |
| 8.597172148                        | 2.705089622                                 | 0.356336237                               | 7.008127061                       | 2.212090484                             |
| 14.77311024                        | 3.030960187                                 | 0.322875876                               | 7.635313059                       | 2.790415931                             |
| 11.81275418                        | 2.898937104                                 | 0.340336033                               | 7.37969902                        | 2.521781605                             |
| 4.903424385                        | 2.335650592                                 | 0.414032744                               | 6.276137562                       | 1.66008151                              |
| 10.56537851                        | 2.822529349                                 | 0.338985675                               | 7.299146267                       | 2.476163304                             |
| 7.691114506                        | 2.591609872                                 | 0.391640483                               | 6.703570344                       | 1.976578725                             |
| 14.69334438                        | 3.039714608                                 | 0.308521527                               | 7.727743937                       | 2.871441994                             |
| 18.71969033                        | 3.213018342                                 | 0.278940854                               | 8.023987474                       | 3.260363993                             |
| 10.05934876                        | 2.810780955                                 | 0.346088755                               | 7.336690177                       | 2.374217271                             |
| 12.79345455                        | 2.916314416                                 | 0.325706896                               | 7.279499631                       | 2.681275859                             |
| 12.33966349                        | 2.924631318                                 | 0.325929733                               | 7.44457688                        | 2.624526473                             |
| 10.96939856                        | 2.832923453                                 | 0.350129544                               | 7.138526282                       | 2.407029375                             |
| 14.8789955                         | 3.061341198                                 | 0.299931545                               | 7.854931358                       | 2.910386413                             |
| 12.84602145                        | 2.901152356                                 | 0.350604315                               | 7.353504486                       | 2.517351814                             |
| 12.24532379                        | 2.901286003                                 | 0.34499305                                | 7.121081354                       | 2.520178689                             |
| 14.31563852                        | 3.026988169                                 | 0.32237443                                | 7.756720654                       | 2.692458402                             |
| 10.43596285                        | 2.75758932                                  | 0.372371658                               | 6.950099737                       | 2.205982098                             |
| 10.85729349                        | 2.860072615                                 | 0.338007174                               | 7.41304423                        | 2.47684735                              |
| 13.98645101                        | 3.017659874                                 | 0.322965361                               | 7.727569476                       | 2.740930165                             |
| 11.41346744                        | 2.861469687                                 | 0.348939292                               | 7.510518631                       | 2.461919243                             |
| 8.868556728                        | 2.682757716                                 | 0.346285248                               | 6.894746592                       | 2.25164528                              |
| 11.03387937                        | 2.808000764                                 | 0.364624048                               | 7.154299737                       | 2.285711769                             |
| 6.904186726                        | 2.475243782                                 | 0.414827687                               | 6.236746841                       | 1.755219055                             |
| 14.57174827                        | 3.010802619                                 | 0.336872581                               | 7.725738416                       | 2.709117944                             |
| 11.96308923                        | 2.899338367                                 | 0.342527739                               | 7.485036248                       | 2.502746255                             |
| 6.872505585                        | 2.539940769                                 | 0.401881603                               | 6.701753451                       | 1.896429724                             |
| 12.38935254                        | 2.87891601                                  | 0.34459253                                | 7.202839031                       | 2.546343502                             |
| 11.67829276                        | 2.864271774                                 | 0.335680479                               | 7.468996637                       | 2.430382968                             |
| 13.5871809                         | 2.95394424                                  | 0.336419885                               | 7.3415288                         | 2.616468561                             |
| 21.23035879                        | 3.287181071                                 | 0.277303153                               | 7.995956058                       | 3.438873294                             |
| 16.08285056                        | 3.103236369                                 | 0.298287815                               | 7.98130715                        | 3.011534649                             |
| 11.86600061                        | 2.845192505                                 | 0.359112389                               | 7.027000267                       | 2.417425297                             |
| 6.906771081                        | 2.535450277                                 | 0.400946981                               | 6.655042789                       | 1.887741328                             |
| 7.537329288                        | 2.601222342                                 | 0.380731619                               | 6.819759192                       | 2.001431546                             |
| 8.303669857                        | 2.679510944                                 | 0.366858112                               | 6.973295687                       | 2.141379619                             |
| 21.68677419                        | 3.275994542                                 | 0.283123884                               | 8.096147339                       | 3.407258791                             |
| 26.84901484                        | 3.420562791                                 | 0.269595696                               | 8.2097318                         | 3.737636222                             |
| 12.79488607                        | 2.920251412                                 | 0.350065138                               | 7.14509909                        | 2.507195705                             |
| 13.2106004                         | 2.935183637                                 | 0.330549154                               | 7.449274139                       | 2.615173599                             |
| 7.48265096                         | 2.601538548                                 | 0.379919948                               | 6.994645272                       | 2.040459901                             |
| 15.72736489                        | 3.077923926                                 | 0.302237642                               | 7.889102927                       | 2.969939138                             |
| 4.463621037                        | 2.288790165                                 | 0.426767326                               | 6.226001136                       | 1.545819097                             |
| 19.37407946                        | 3.189110148                                 | 0.312266656                               | 7.799301267                       | 3.127917866                             |
| 11.68989805                        | 2.889863863                                 | 0.348831173                               | 7.399426738                       | 2.474935823                             |
| 8.885024497                        | 2.716158055                                 | 0.363268466                               | 7.044711128                       | 2.212171122                             |
| 9.723518638                        | 2.732125307                                 | 0.373320221                               | 7.097233613                       | 2.201798533                             |
| 6.205708557                        | 2.432178165                                 | 0.410229552                               | 6.038869874                       | 1.707206052                             |
| 14.69269178                        | 3.064716312                                 | 0.297602695                               | 7.870245085                       | 2.903332873                             |
| 14.73520138                        | 3.034421168                                 | 0.328901282                               | 7.649215344                       | 2.771921491                             |
| 12.67119453                        | 2.936033573                                 | 0.340459726                               | 7.389143514                       | 2.578982931                             |
| 11.85802676                        | 2.907793745                                 | 0.333093265                               | 7.512100218                       | 2.583143204                             |
| 15.4300776                         | 3.026750752                                 | 0.334478705                               | 7.650386808                       | 2.702546909                             |
| 9.906882808                        | 2.797934534                                 | 0.346518311                               | 7.517305475                       | 2.367393128                             |
| 11.87239108                        | 2.792718968                                 | 0.375660429                               | 6.819913713                       | 2.298287822                             |
| 5.951618559                        | 2.452217976                                 | 0.411831784                               | 6.419450059                       | 1.797132809                             |
| 11.00612177                        | 2.82919184                                  | 0.361421659                               | 7.242043399                       | 2.357162509                             |

| log.sigma.3.5.mm.3D_glc_m_DifferenceVariance | log.sigma.3.5.mm.3D_glc_m_ldn | log.sigma.3.5.mm.3D_glc_m_ldm | log.sigma.3.5.mm.3D_glc_m_Correlation | log.sigma.3.5.mm.3D_glc_m_Autocorrelation |
|----------------------------------------------|-------------------------------|-------------------------------|---------------------------------------|-------------------------------------------|
| 12.51345854                                  | 0.914699894                   | 0.267634945                   | 0.593968464                           | 563.7867994                               |
| 3.205173243                                  | 0.917489704                   | 0.412449186                   | 0.635012332                           | 100.6387887                               |
| 4.066273653                                  | 0.929521118                   | 0.384287644                   | 0.699124082                           | 189.9610902                               |
| 8.674143552                                  | 0.915366549                   | 0.2945999                     | 0.630689353                           | 314.7169122                               |
| 5.510479608                                  | 0.922610648                   | 0.349014731                   | 0.605292332                           | 261.694819                                |
| 5.634221828                                  | 0.912161831                   | 0.332550192                   | 0.664878949                           | 147.5550312                               |
| 5.083109178                                  | 0.94306516                    | 0.339962572                   | 0.654559376                           | 324.9563417                               |
| 5.218355759                                  | 0.939589206                   | 0.354462746                   | 0.667705351                           | 492.2919071                               |
| 6.370903736                                  | 0.932694814                   | 0.327240993                   | 0.62441616                            | 456.0139363                               |
| 5.677730525                                  | 0.935168907                   | 0.331835172                   | 0.653705874                           | 559.6714175                               |
| 3.344346027                                  | 0.916821604                   | 0.379786846                   | 0.639062446                           | 156.1024866                               |
| 5.303143352                                  | 0.931981194                   | 0.331374485                   | 0.662416388                           | 350.2081505                               |
| 4.488280241                                  | 0.944261622                   | 0.455997358                   | 0.700210698                           | 287.1968385                               |
| 8.3774376                                    | 0.929215111                   | 0.330994229                   | 0.607216566                           | 462.1239009                               |
| 8.287262587                                  | 0.926356227                   | 0.300409096                   | 0.550922931                           | 383.310686                                |
| 6.176667087                                  | 0.925803382                   | 0.318137712                   | 0.630140029                           | 322.1480698                               |
| 6.028704285                                  | 0.916255638                   | 0.320382118                   | 0.577992842                           | 295.8601296                               |
| 4.253990511                                  | 0.920698712                   | 0.410933822                   | 0.64945852                            | 114.5951161                               |
| 2.614692061                                  | 0.914703376                   | 0.407005962                   | 0.645626274                           | 106.7069885                               |
| 5.013732156                                  | 0.930276795                   | 0.328781129                   | 0.688955765                           | 274.3661083                               |
| 2.90636119                                   | 0.940329935                   | 0.446196722                   | 0.703313171                           | 158.9711794                               |
| 2.998621169                                  | 0.908471096                   | 0.360590295                   | 0.645719715                           | 119.4577539                               |
| 3.675039603                                  | 0.922340752                   | 0.379524387                   | 0.677492078                           | 141.6291791                               |
| 4.420449339                                  | 0.928466525                   | 0.369470182                   | 0.61844649                            | 223.9140426                               |
| 7.375702555                                  | 0.922379157                   | 0.317618906                   | 0.49885684                            | 341.854563                                |
| 7.98090784                                   | 0.933897886                   | 0.300823379                   | 0.63065247                            | 540.1326615                               |
| 8.752349993                                  | 0.931902959                   | 0.31452847                    | 0.639357258                           | 484.326654                                |
| 5.487685825                                  | 0.931263317                   | 0.350297037                   | 0.594047723                           | 336.6121292                               |
| 2.664017933                                  | 0.909963933                   | 0.382540623                   | 0.683628512                           | 95.8564363                                |
| 3.392898934                                  | 0.935786578                   | 0.41036232                    | 0.645171235                           | 250.338434                                |
| 5.861750002                                  | 0.936286117                   | 0.35477578                    | 0.626183552                           | 442.5108782                               |
| 5.750002664                                  | 0.936595138                   | 0.398707859                   | 0.515104839                           | 359.7902835                               |
| 7.852759366                                  | 0.925606215                   | 0.302823765                   | 0.646500962                           | 397.7702434                               |
| 7.233306869                                  | 0.921500727                   | 0.320194092                   | 0.617636811                           | 388.2259115                               |
| 5.077674622                                  | 0.926296948                   | 0.324542468                   | 0.634424605                           | 320.3494718                               |
| 4.835161645                                  | 0.936601572                   | 0.372715005                   | 0.624810503                           | 405.3995598                               |
| 7.034912419                                  | 0.950122599                   | 0.400286637                   | 0.604717155                           | 647.7712661                               |
| 7.774933403                                  | 0.945602494                   | 0.374377228                   | 0.69397462                            | 599.2596763                               |
| 2.207318609                                  | 0.913291718                   | 0.42914147                    | 0.511044828                           | 116.3419745                               |
| 6.339413682                                  | 0.922427618                   | 0.298621582                   | 0.682309826                           | 266.2589436                               |
| 7.380906739                                  | 0.931488963                   | 0.361406939                   | 0.557270039                           | 371.6484559                               |
| 8.307975784                                  | 0.923137856                   | 0.262575201                   | 0.627049522                           | 357.795896                                |
| 6.718817065                                  | 0.921323476                   | 0.29516755                    | 0.575788337                           | 382.2688846                               |
| 7.359499785                                  | 0.935904484                   | 0.319014815                   | 0.53857863                            | 360.9551165                               |
| 3.594082279                                  | 0.925574268                   | 0.367552575                   | 0.694573846                           | 149.1877778                               |
| 6.761625717                                  | 0.926607392                   | 0.327649431                   | 0.605395308                           | 357.3064121                               |
| 5.280987439                                  | 0.932688872                   | 0.345819809                   | 0.605952966                           | 365.1063576                               |
| 2.040682924                                  | 0.920309729                   | 0.443065503                   | 0.713247553                           | 75.75914012                               |
| 4.277252206                                  | 0.914820062                   | 0.332852766                   | 0.678459838                           | 187.4165119                               |
| 3.595764763                                  | 0.931086049                   | 0.418596747                   | 0.687357572                           | 107.4612644                               |
| 6.258876877                                  | 0.917583055                   | 0.302651499                   | 0.619174229                           | 334.0794845                               |
| 7.812752304                                  | 0.919431734                   | 0.276694723                   | 0.575720332                           | 321.2096088                               |
| 4.292520805                                  | 0.930294186                   | 0.35158431                    | 0.645297622                           | 241.0813677                               |
| 5.250015088                                  | 0.905902756                   | 0.320385477                   | 0.560896913                           | 132.5685064                               |
| 5.246388856                                  | 0.907724662                   | 0.329918482                   | 0.645401723                           | 171.1560579                               |
| 5.025263138                                  | 0.941782103                   | 0.357143718                   | 0.602138455                           | 493.1955287                               |
| 6.138402724                                  | 0.914056591                   | 0.303122017                   | 0.628037004                           | 301.9921315                               |
| 6.29509296                                   | 0.929617006                   | 0.355499806                   | 0.637764231                           | 368.2039915                               |
| 5.748498231                                  | 0.920125694                   | 0.349101802                   | 0.493066245                           | 245.6456845                               |
| 6.862468317                                  | 0.937477757                   | 0.353027923                   | 0.627216291                           | 474.3588716                               |
| 5.449491483                                  | 0.941062565                   | 0.402642549                   | 0.651035676                           | 214.5889309                               |
| 4.587498881                                  | 0.931598065                   | 0.341152188                   | 0.660824681                           | 336.0878578                               |
| 6.314212461                                  | 0.936073645                   | 0.327836435                   | 0.643785477                           | 505.763641                                |
| 5.148477639                                  | 0.941982045                   | 0.350693392                   | 0.689346805                           | 444.3732716                               |
| 3.613300129                                  | 0.91252561                    | 0.358793288                   | 0.601204525                           | 152.8326128                               |
| 5.644657356                                  | 0.943633305                   | 0.392521041                   | 0.663104128                           | 484.3774788                               |
| 3.72552385                                   | 0.936464279                   | 0.462069402                   | 0.550499679                           | 228.4531108                               |
| 7.040883782                                  | 0.943701359                   | 0.340687652                   | 0.646688787                           | 518.6690162                               |
| 5.522742526                                  | 0.939773949                   | 0.351078903                   | 0.636362302                           | 483.3309037                               |
| 3.171712082                                  | 0.930868425                   | 0.417238219                   | 0.635716276                           | 211.6982459                               |
| 5.588495838                                  | 0.926362489                   | 0.343468106                   | 0.616882063                           | 338.5400339                               |
| 5.633379601                                  | 0.938541865                   | 0.361958376                   | 0.685750234                           | 427.7083688                               |
| 6.534638394                                  | 0.932719164                   | 0.346527111                   | 0.607748931                           | 476.6783387                               |
| 9.054904068                                  | 0.906638095                   | 0.274001312                   | 0.541986295                           | 334.5372496                               |
| 6.738175612                                  | 0.920917769                   | 0.295375538                   | 0.653321815                           | 257.6663132                               |
| 5.796261895                                  | 0.920906002                   | 0.369700434                   | 0.595707711                           | 286.3641267                               |
| 3.243551401                                  | 0.93124061                    | 0.420162687                   | 0.611611652                           | 168.0508881                               |
| 3.393241367                                  | 0.932369171                   | 0.406147294                   | 0.739610571                           | 163.6107879                               |
| 3.617652381                                  | 0.92264969                    | 0.377620903                   | 0.633254691                           | 184.9877912                               |
| 9.662124823                                  | 0.920791669                   | 0.279246882                   | 0.656106577                           | 485.4423937                               |
| 12.43182329                                  | 0.912570777                   | 0.276135779                   | 0.606320901                           | 516.748431                                |
| 6.354580283                                  | 0.937045938                   | 0.368186847                   | 0.539626393                           | 224.2869319                               |
| 6.075941459                                  | 0.932566768                   | 0.343017645                   | 0.608523095                           | 404.684652                                |
| 3.167110295                                  | 0.930852524                   | 0.388235735                   | 0.697545281                           | 231.3643125                               |
| 6.620825167                                  | 0.929393405                   | 0.298769961                   | 0.654534372                           | 346.1326268                               |
| 2.019826296                                  | 0.937596575                   | 0.46889796                    | 0.761343788                           | 177.6847548                               |
| 9.247712088                                  | 0.917282583                   | 0.317769469                   | 0.592084706                           | 363.5270408                               |
| 5.434701969                                  | 0.93024791                    | 0.357310969                   | 0.649191856                           | 288.6044484                               |
| 3.852018339                                  | 0.925856258                   | 0.375430687                   | 0.666496117                           | 195.3498389                               |
| 4.737923594                                  | 0.935541529                   | 0.387624168                   | 0.659641105                           | 311.850699                                |
| 3.099108484                                  | 0.92379005                    | 0.473401492                   | 0.728047898                           | 79.0040487                                |
| 6.065530531                                  | 0.911544966                   | 0.305129897                   | 0.663175193                           | 230.1272892                               |
| 6.860756676                                  | 0.932468128                   | 0.330666286                   | 0.596790451                           | 459.2378531                               |
| 5.821381613                                  | 0.929668677                   | 0.348448676                   | 0.584509537                           | 364.5255263                               |
| 5.014427413                                  | 0.922599339                   | 0.328514404                   | 0.609928933                           | 240.7519223                               |
| 7.910279102                                  | 0.936191465                   | 0.357251174                   | 0.662546109                           | 466.7164307                               |
| 4.151245404                                  | 0.923636714                   | 0.351476525                   | 0.727641765                           | 200.0933653                               |
| 6.308016443                                  | 0.93202579                    | 0.409954008                   | 0.66017099                            | 414.0627163                               |
| 2.610247549                                  | 0.922386765                   | 0.428553449                   | 0.630068311                           | 156.5040859                               |
| 5.279945293                                  | 0.929408202                   | 0.372431079                   | 0.610572132                           | 263.0078518                               |

| log.sigma.3.5.mm.3D_glcM_SumEntropy | log.sigma.3.5.mm.3D_glcM_AverageIntensity | log.sigma.3.5.mm.3D_glcM_Energy | log.sigma.3.5.mm.3D_glcM_SumSquares | log.sigma.3.5.mm.3D_glcM_ClusterProminence |
|-------------------------------------|-------------------------------------------|---------------------------------|-------------------------------------|--------------------------------------------|
| 5.309292878                         | 23.4638813                                | 0.005403063                     | 32.55049966                         | 42609.36866                                |
| 4.377613288                         | 9.711549597                               | 0.019246359                     | 9.85242439                          | 3461.060703                                |
| 4.82929372                          | 13.40617336                               | 0.009912271                     | 15.11657226                         | 7670.586829                                |
| 5.123851484                         | 17.37962107                               | 0.006286841                     | 26.21940159                         | 21500.61322                                |
| 4.796132082                         | 15.92551424                               | 0.00955877                      | 15.53038762                         | 8051.782926                                |
| 4.831638239                         | 11.5805279                                | 0.011059525                     | 20.1865198                          | 12227.19896                                |
| 4.888356073                         | 17.80532315                               | 0.009031052                     | 16.76198066                         | 11622.3468                                 |
| 4.864246496                         | 21.98307303                               | 0.010173056                     | 16.70632721                         | 13145.39767                                |
| 4.98332177                          | 21.17302334                               | 0.006984593                     | 18.32155417                         | 12755.62857                                |
| 4.869222513                         | 23.44365873                               | 0.008584753                     | 18.20050234                         | 18065.45386                                |
| 4.595993139                         | 12.20263401                               | 0.011917855                     | 11.21009026                         | 4312.942358                                |
| 4.948229008                         | 18.46088912                               | 0.00831651                      | 18.31078515                         | 12739.3439                                 |
| 4.540199065                         | 16.69788552                               | 0.02480727                      | 14.12039307                         | 10808.93827                                |
| 4.940187545                         | 21.2961236                                | 0.009268324                     | 20.7287811                          | 22853.03278                                |
| 4.921767548                         | 19.43966283                               | 0.008580632                     | 19.83956148                         | 17547.04715                                |
| 4.9940823                           | 17.69783457                               | 0.007880828                     | 19.7784147                          | 12978.38174                                |
| 4.755604446                         | 16.95552232                               | 0.008979654                     | 16.71718421                         | 11087.22572                                |
| 4.502472843                         | 10.30751954                               | 0.017210139                     | 12.64567528                         | 5875.532088                                |
| 4.385668715                         | 10.04507399                               | 0.01618547                      | 8.964284867                         | 2320.085256                                |
| 5.027378943                         | 16.22882813                               | 0.007395983                     | 19.71535477                         | 13214.50073                                |
| 4.513313469                         | 12.31635736                               | 0.018967142                     | 10.36543676                         | 4607.860599                                |
| 4.581404922                         | 10.5991384                                | 0.010822785                     | 10.96805166                         | 3435.319682                                |
| 4.639615388                         | 11.51573644                               | 0.013678611                     | 13.2105497                          | 6362.086902                                |
| 4.681865843                         | 14.71075571                               | 0.011007988                     | 13.11806055                         | 6335.540151                                |
| 4.764758405                         | 18.38214765                               | 0.009256259                     | 16.32005204                         | 9168.540776                                |
| 5.097902303                         | 22.99120045                               | 0.00699539                      | 23.86945613                         | 29513.51201                                |
| 5.121074558                         | 21.73845165                               | 0.007871187                     | 25.00534287                         | 31645.82561                                |
| 4.757140419                         | 18.18496764                               | 0.010696879                     | 14.95776089                         | 8544.803924                                |
| 4.397041233                         | 9.405720974                               | 0.016303661                     | 10.79413314                         | 3313.12221                                 |
| 4.522397408                         | 15.61886124                               | 0.015452373                     | 10.50256607                         | 4549.636353                                |
| 4.843242382                         | 20.89615655                               | 0.00991184                      | 16.15446593                         | 11527.98936                                |
| 4.292432141                         | 18.91033486                               | 0.019405433                     | 11.48787777                         | 9175.75015                                 |
| 5.171371911                         | 19.64984926                               | 0.006166355                     | 24.55060574                         | 22627.71568                                |
| 4.981519702                         | 19.4760874                                | 0.008389255                     | 21.02406117                         | 19178.16451                                |
| 4.882479261                         | 17.69217365                               | 0.007686972                     | 16.91338259                         | 9908.177491                                |
| 4.673423795                         | 20.00213652                               | 0.012509649                     | 13.79466161                         | 9352.286395                                |
| 4.649502884                         | 25.33214402                               | 0.016955553                     | 16.10869569                         | 18362.58049                                |
| 5.140209611                         | 24.23116789                               | 0.011765671                     | 24.91846467                         | 26788.01979                                |
| 3.994024482                         | 10.65756833                               | 0.020579167                     | 5.390289836                         | 991.6188589                                |
| 5.199946552                         | 15.90062246                               | 0.005251101                     | 24.50454343                         | 19145.58031                                |
| 4.646961855                         | 19.18151032                               | 0.014050656                     | 16.21139792                         | 15583.53194                                |
| 5.227349904                         | 18.63494908                               | 0.004806847                     | 27.20661423                         | 30523.97912                                |
| 4.953775206                         | 19.45081882                               | 0.006772777                     | 18.69204988                         | 11680.45856                                |
| 4.834659446                         | 18.87536097                               | 0.008454542                     | 16.84859018                         | 12261.62816                                |
| 4.678675721                         | 11.80290822                               | 0.01228419                      | 14.2415974                          | 7359.695723                                |
| 4.916421363                         | 18.72878189                               | 0.008050994                     | 18.84268823                         | 16355.25005                                |
| 4.770802534                         | 18.98125398                               | 0.010522801                     | 15.09126549                         | 9635.42178                                 |
| 4.32827183                          | 8.341088752                               | 0.020251265                     | 8.629378008                         | 2605.597676                                |
| 4.864701725                         | 13.27390527                               | 0.008927027                     | 16.4822192                          | 9031.717336                                |
| 4.570255023                         | 9.933824202                               | 0.016915779                     | 12.61456867                         | 6391.526005                                |
| 4.98364744                          | 18.04264951                               | 0.006797758                     | 19.84756042                         | 13832.18375                                |
| 5.067134504                         | 17.72659644                               | 0.005654177                     | 22.16257841                         | 15878.57624                                |
| 4.775058141                         | 15.26411144                               | 0.00991137                      | 14.62930407                         | 7320.265945                                |
| 4.71537067                          | 11.15278017                               | 0.009142147                     | 14.57474087                         | 5994.413489                                |
| 4.869979301                         | 12.63941691                               | 0.008244653                     | 17.53250182                         | 8176.10791                                 |
| 4.695901698                         | 22.0889647                                | 0.011972695                     | 13.26040846                         | 7947.365032                                |
| 5.028310819                         | 17.05544634                               | 0.006380047                     | 20.35479896                         | 13652.73019                                |
| 4.801826222                         | 18.99450186                               | 0.011346237                     | 17.85686246                         | 18790.47848                                |
| 4.567443794                         | 15.49300633                               | 0.011736477                     | 12.25828613                         | 5248.047332                                |
| 4.990693082                         | 21.58083429                               | 0.007982175                     | 18.62533379                         | 13751.4924                                 |
| 4.64455301                          | 14.3613986                                | 0.016545086                     | 15.54619897                         | 10656.76863                                |
| 4.853453957                         | 18.11192836                               | 0.009100947                     | 16.29190498                         | 8886.696163                                |
| 4.986907215                         | 22.2675743                                | 0.007890747                     | 19.25264924                         | 17352.37446                                |
| 4.904612624                         | 20.85884526                               | 0.009332257                     | 18.12140351                         | 15306.89309                                |
| 4.558933819                         | 12.08293227                               | 0.011256653                     | 11.23417355                         | 3967.733571                                |
| 4.756340469                         | 21.81677023                               | 0.014569298                     | 15.84210021                         | 15640.24924                                |
| 4.204851965                         | 14.97326584                               | 0.025438542                     | 7.70234375                          | 3265.821772                                |
| 5.012288113                         | 22.5709677                                | 0.009130231                     | 20.54744769                         | 19485.27284                                |
| 4.86345451                          | 21.82469791                               | 0.009037758                     | 15.85566842                         | 12597.82358                                |
| 4.465436822                         | 14.3388648                                | 0.015188213                     | 9.520944934                         | 3207.224039                                |
| 4.733535153                         | 18.2241533                                | 0.010419581                     | 16.4098623                          | 13591.45119                                |
| 4.926603203                         | 20.44636737                               | 0.010352794                     | 18.29399062                         | 15003.62006                                |
| 4.796342478                         | 21.66176062                               | 0.01022426                      | 16.95616496                         | 17904.06612                                |
| 5.033164606                         | 18.08474205                               | 0.006233976                     | 23.50979965                         | 17553.6659                                 |
| 5.137440205                         | 15.66117715                               | 0.005790644                     | 23.773803                           | 19004.91534                                |
| 4.650948562                         | 16.66366762                               | 0.012968361                     | 14.65506717                         | 10701.28888                                |
| 4.431112685                         | 12.74426578                               | 0.015757922                     | 9.073831808                         | 3077.455768                                |
| 4.684904991                         | 12.36585094                               | 0.015776205                     | 14.60450563                         | 10171.92523                                |
| 4.594341542                         | 13.33304091                               | 0.012163782                     | 11.36016042                         | 4523.010378                                |
| 5.215977034                         | 21.67650447                               | 0.006046291                     | 30.6533734                          | 42673.21454                                |
| 5.290167776                         | 22.41661257                               | 0.005810473                     | 32.73803364                         | 47210.40957                                |
| 4.620291688                         | 14.79057373                               | 0.0128365                       | 14.34059409                         | 9683.11497                                 |
| 4.841726915                         | 19.96636644                               | 0.009817672                     | 16.66557301                         | 12658.2605                                 |
| 4.659497053                         | 14.92321451                               | 0.012640781                     | 12.41086784                         | 7390.176195                                |
| 5.104018805                         | 18.341778                                 | 0.006569774                     | 22.55887744                         | 20815.7403                                 |
| 4.359473461                         | 13.05393104                               | 0.022806946                     | 9.504314076                         | 3656.83745                                 |
| 4.996318325                         | 18.82774986                               | 0.008253563                     | 23.85449637                         | 24319.38868                                |
| 4.856442585                         | 16.75244517                               | 0.010107647                     | 17.18691092                         | 9534.694475                                |
| 4.71135959                          | 13.65349144                               | 0.012100936                     | 13.41609311                         | 6789.002782                                |
| 4.746772971                         | 17.43443581                               | 0.012577129                     | 14.60795289                         | 9479.936759                                |
| 4.251313733                         | 8.394437837                               | 0.030926596                     | 11.62207751                         | 4142.224545                                |
| 5.095556897                         | 14.71919992                               | 0.006197629                     | 22.33623032                         | 15264.21565                                |
| 4.903964678                         | 21.25669002                               | 0.008439525                     | 17.77892331                         | 15420.66709                                |
| 4.773020931                         | 18.95117457                               | 0.010315428                     | 15.5093651                          | 9836.091503                                |
| 4.828185221                         | 15.23007341                               | 0.008122763                     | 15.41757613                         | 7831.63524                                 |
| 5.024501051                         | 21.34148659                               | 0.009680845                     | 22.28177234                         | 25911.47262                                |
| 4.977374248                         | 13.67863753                               | 0.008453382                     | 18.37809114                         | 12684.01472                                |
| 4.567926511                         | 20.13974593                               | 0.016887756                     | 17.3767555                          | 22029.6937                                 |
| 4.341987024                         | 12.30386636                               | 0.017364128                     | 8.092007302                         | 2505.774248                                |
| 4.713287492                         | 15.98786755                               | 0.011609647                     | 14.47570755                         | 6193.495364                                |

| log.sigma.3.5.mm.3D_glc_m_SumAverage | log.sigma.3.5.mm.3D_glc_m_Irc2 | log.sigma.3.5.mm.3D_glc_m_Irc1 | log.sigma.3.5.mm.3D_glc_m_DifferenceAverage | log.sigma.3.5.mm.3D_glc_m_Id |
|--------------------------------------|--------------------------------|--------------------------------|---------------------------------------------|------------------------------|
| 46.64298573                          | 0.850105468                    | -0.147781766                   | 3.821980651                                 | 0.352004791                  |
| 19.42309919                          | 0.830773712                    | -0.174282854                   | 1.934436931                                 | 0.477448535                  |
| 26.79270987                          | 0.869263327                    | -0.187276473                   | 2.178877198                                 | 0.454305626                  |
| 34.54931863                          | 0.88480994                     | -0.181575788                   | 3.186214035                                 | 0.377621027                  |
| 31.77972548                          | 0.805983511                    | -0.138035491                   | 2.514514773                                 | 0.425583076                  |
| 23.15654862                          | 0.896106825                    | -0.212465864                   | 2.694320315                                 | 0.411702725                  |
| 35.43535667                          | 0.799113338                    | -0.135227794                   | 2.529862203                                 | 0.418613195                  |
| 43.85618992                          | 0.816682148                    | -0.143925977                   | 2.441329234                                 | 0.430151742                  |
| 42.155508                            | 0.794136074                    | -0.131307761                   | 2.754912111                                 | 0.406457906                  |
| 46.79727446                          | 0.871579435                    | -0.181007632                   | 2.634139913                                 | 0.41252538                   |
| 24.40526802                          | 0.807307708                    | -0.152668785                   | 2.129625545                                 | 0.452286644                  |
| 36.77575938                          | 0.832214604                    | -0.149544632                   | 2.618707432                                 | 0.41096587                   |
| 33.31946301                          | 0.88807472                     | -0.220165822                   | 1.898154225                                 | 0.51250244                   |
| 42.38582316                          | 0.856068993                    | -0.164584656                   | 2.865197994                                 | 0.408426516                  |
| 38.5821435                           | 0.805769218                    | -0.133132842                   | 3.13581189                                  | 0.382523648                  |
| 35.20991214                          | 0.810459808                    | -0.139628118                   | 2.812724035                                 | 0.399085978                  |
| 33.84288588                          | 0.816089945                    | -0.144488617                   | 2.742952046                                 | 0.40098237                   |
| 20.61503909                          | 0.852687025                    | -0.185882719                   | 2.053385706                                 | 0.475927318                  |
| 20.09014797                          | 0.805064164                    | -0.157244752                   | 1.892846889                                 | 0.474396119                  |
| 32.31492633                          | 0.819327858                    | -0.142403846                   | 2.608390571                                 | 0.409385477                  |
| 24.6291986                           | 0.845251034                    | -0.183425882                   | 1.747592209                                 | 0.505654291                  |
| 21.1982768                           | 0.813554961                    | -0.152858625                   | 2.144672802                                 | 0.437943556                  |
| 23.03147288                          | 0.856679882                    | -0.181869233                   | 2.153170186                                 | 0.451706702                  |
| 29.38769747                          | 0.793431289                    | -0.137403739                   | 2.294250058                                 | 0.442900973                  |
| 36.54105298                          | 0.815739438                    | -0.148126519                   | 2.889183119                                 | 0.398025357                  |
| 45.80988728                          | 0.842464222                    | -0.154439004                   | 3.072885036                                 | 0.383746808                  |
| 43.27298604                          | 0.840028711                    | -0.15045241                    | 3.042457425                                 | 0.394619854                  |
| 36.21363894                          | 0.787064077                    | -0.129956656                   | 2.510091878                                 | 0.425984209                  |
| 18.81144195                          | 0.871558937                    | -0.203273531                   | 2.003932842                                 | 0.454453379                  |
| 31.21790005                          | 0.816191724                    | -0.159470275                   | 1.963197972                                 | 0.47672585                   |
| 41.57454838                          | 0.802164753                    | -0.137669833                   | 2.528345653                                 | 0.42887202                   |
| 37.63013411                          | 0.74904763                     | -0.123408347                   | 2.254373728                                 | 0.464971189                  |
| 39.06913495                          | 0.825363716                    | -0.14128239                    | 3.083389168                                 | 0.385025378                  |
| 38.74246377                          | 0.828281867                    | -0.147658896                   | 2.920771496                                 | 0.400089593                  |
| 35.20508537                          | 0.787861725                    | -0.127326059                   | 2.609308319                                 | 0.406316093                  |
| 39.83815799                          | 0.813621774                    | -0.15118391                    | 2.297062266                                 | 0.44567911                   |
| 50.51852891                          | 0.824759399                    | -0.159572604                   | 2.348819911                                 | 0.465519502                  |
| 48.24640445                          | 0.884960423                    | -0.191258508                   | 2.689293063                                 | 0.445625381                  |
| 21.31513666                          | 0.693058698                    | -0.11115598                    | 1.726219128                                 | 0.493050236                  |
| 31.6146982                           | 0.805133552                    | -0.130043143                   | 2.943002843                                 | 0.383590035                  |
| 38.08393634                          | 0.788558795                    | -0.133099917                   | 2.614607116                                 | 0.433057138                  |
| 36.91733576                          | 0.798377551                    | -0.124516963                   | 3.436929444                                 | 0.351219734                  |
| 38.55110568                          | 0.772069773                    | -0.119613584                   | 2.99844036                                  | 0.380201149                  |
| 37.50471028                          | 0.768732171                    | -0.117548988                   | 2.900532567                                 | 0.39846814                   |
| 23.60172382                          | 0.850636451                    | -0.174959084                   | 2.212090484                                 | 0.442574558                  |
| 37.20099499                          | 0.808651791                    | -0.1366149                     | 2.790415931                                 | 0.406591748                  |
| 37.73512083                          | 0.768251503                    | -0.122630193                   | 2.521781605                                 | 0.422710753                  |
| 16.6821775                           | 0.85431622                     | -0.20113788                    | 1.66008151                                  | 0.504422016                  |
| 26.54781054                          | 0.88169639                     | -0.191026767                   | 2.476163304                                 | 0.413322856                  |
| 19.8676484                           | 0.863392093                    | -0.199006963                   | 1.976578725                                 | 0.482399403                  |
| 35.89096573                          | 0.804930945                    | -0.132551877                   | 2.871441994                                 | 0.387060923                  |
| 35.13621164                          | 0.770727741                    | -0.112486906                   | 3.260363993                                 | 0.364065187                  |
| 30.45128315                          | 0.782322434                    | -0.129528941                   | 2.374217271                                 | 0.428823472                  |
| 22.30556035                          | 0.820915566                    | -0.148993228                   | 2.681275859                                 | 0.401898223                  |
| 25.27883382                          | 0.838740522                    | -0.158823484                   | 2.624526473                                 | 0.410092864                  |
| 44.03846378                          | 0.81661195                     | -0.150443137                   | 2.407029375                                 | 0.432436329                  |
| 34.02453653                          | 0.782734224                    | -0.122061616                   | 2.910386413                                 | 0.387452246                  |
| 37.78504595                          | 0.808706189                    | -0.143012586                   | 2.517351814                                 | 0.430050681                  |
| 30.96093114                          | 0.759371122                    | -0.119297431                   | 2.520178689                                 | 0.425202727                  |
| 43.00443543                          | 0.794055877                    | -0.128964425                   | 2.692458402                                 | 0.427538748                  |
| 28.61700288                          | 0.856262979                    | -0.180425743                   | 2.205982098                                 | 0.468866119                  |
| 36.08322152                          | 0.815355466                    | -0.143696058                   | 2.47684735                                  | 0.41981345                   |
| 44.41121243                          | 0.796343102                    | -0.128637021                   | 2.740930165                                 | 0.407231086                  |
| 41.54898544                          | 0.814585966                    | -0.146430858                   | 2.461919243                                 | 0.4267749                    |
| 24.16586454                          | 0.825242847                    | -0.16422979                    | 2.25164528                                  | 0.436431299                  |
| 43.52541122                          | 0.832211534                    | -0.159752826                   | 2.285711769                                 | 0.460595738                  |
| 29.94653169                          | 0.792035159                    | -0.155350706                   | 1.755219055                                 | 0.517613599                  |
| 44.95825527                          | 0.81257129                     | -0.139032541                   | 2.709117944                                 | 0.416789487                  |
| 43.48938708                          | 0.792530578                    | -0.131980552                   | 2.502746255                                 | 0.427101407                  |
| 28.6777296                           | 0.793586568                    | -0.148941581                   | 1.896429724                                 | 0.481887542                  |
| 36.26228054                          | 0.84246012                     | -0.165462639                   | 2.546343502                                 | 0.420465066                  |
| 40.74027518                          | 0.843619374                    | -0.160396883                   | 2.430382968                                 | 0.435534233                  |
| 43.1779929                           | 0.821372261                    | -0.148211762                   | 2.616468561                                 | 0.422778651                  |
| 35.89157749                          | 0.768928252                    | -0.112225187                   | 3.438873294                                 | 0.359763324                  |
| 31.1447481                           | 0.820136279                    | -0.139031654                   | 3.011534649                                 | 0.3802011                    |
| 33.32431873                          | 0.823799046                    | -0.15856099                    | 2.417425297                                 | 0.441496249                  |
| 25.48853156                          | 0.791542514                    | -0.14899749                    | 1.887741328                                 | 0.484435419                  |
| 24.72500699                          | 0.898409146                    | -0.222690928                   | 2.001431546                                 | 0.473535907                  |
| 26.66608181                          | 0.805000796                    | -0.146168843                   | 2.141379619                                 | 0.450759618                  |
| 43.11925057                          | 0.841542561                    | -0.148414902                   | 3.407258791                                 | 0.364373017                  |
| 44.5544637                           | 0.85944994                     | -0.15286356                    | 3.737636222                                 | 0.359167562                  |
| 29.44513105                          | 0.795088688                    | -0.135331949                   | 2.507195705                                 | 0.439637378                  |
| 39.72312098                          | 0.811554532                    | -0.145014173                   | 2.615173599                                 | 0.420484477                  |
| 29.84507726                          | 0.812139602                    | -0.155917758                   | 2.040459901                                 | 0.459288816                  |
| 36.39848901                          | 0.835295072                    | -0.149807396                   | 2.969939138                                 | 0.383180737                  |
| 26.10786209                          | 0.874673478                    | -0.216984782                   | 1.545819097                                 | 0.524973135                  |
| 37.38842488                          | 0.809554582                    | -0.136908568                   | 3.127917866                                 | 0.395415703                  |
| 33.32964376                          | 0.833757095                    | -0.153904945                   | 2.474935823                                 | 0.431516782                  |
| 27.30448063                          | 0.850176773                    | -0.173627354                   | 2.212171122                                 | 0.448011743                  |
| 34.77838523                          | 0.847169991                    | -0.172258628                   | 2.201798533                                 | 0.457205031                  |
| 16.78887567                          | 0.87221185                     | -0.224228123                   | 1.707206052                                 | 0.527037735                  |
| 29.36611273                          | 0.831857019                    | -0.144639329                   | 2.903332873                                 | 0.389164596                  |
| 42.34677741                          | 0.768111544                    | -0.117732301                   | 2.771921491                                 | 0.408606021                  |
| 37.71134079                          | 0.77526431                     | -0.125814994                   | 2.578982931                                 | 0.423921541                  |
| 30.42676343                          | 0.758299745                    | -0.116234831                   | 2.583143204                                 | 0.409020555                  |
| 42.49738214                          | 0.860522311                    | -0.167749517                   | 2.702546909                                 | 0.430194971                  |
| 27.33720401                          | 0.855498182                    | -0.168237231                   | 2.367393128                                 | 0.428703429                  |
| 40.1356856                           | 0.871930412                    | -0.197460925                   | 2.298287822                                 | 0.472883058                  |
| 24.60773272                          | 0.818650618                    | -0.169095295                   | 1.797132809                                 | 0.491053493                  |
| 31.89693133                          | 0.776008918                    | -0.129769642                   | 2.357162509                                 | 0.444063463                  |

| log.sigma.3.5.mm.3D_glcm_ClusterTendency | log.sigma.3.5.mm.3D_firstorder_InterquartileRange | log.sigma.3.5.mm.3D_firstorder_Skewness | log.sigma.3.5.mm.3D_firstorder_Uniformity |
|------------------------------------------|---------------------------------------------------|-----------------------------------------|-------------------------------------------|
| 107.1107932                              | 150.7092056                                       | -0.778216                               | 0.057743437                               |
| 32.33998083                              | 85.26478767                                       | 0.603331127                             | 0.10606766                                |
| 50.85476105                              | 135.633378                                        | 0.119626096                             | 0.072789904                               |
| 84.18581928                              | 153.5757275                                       | -0.423014706                            | 0.059710077                               |
| 48.80455798                              | 110.4779788                                       | -0.156979381                            | 0.079261351                               |
| 67.23269343                              | 153.748577                                        | 0.569469247                             | 0.074040404                               |
| 55.78069785                              | 132.5896263                                       | 0.308418853                             | 0.072241291                               |
| 57.04359431                              | 122.6233325                                       | 0.084024887                             | 0.076581317                               |
| 61.17710195                              | 141.6602507                                       | -0.166720601                            | 0.066588032                               |
| 61.39055424                              | 144.2932653                                       | -0.615892243                            | 0.071417632                               |
| 36.80238789                              | 110.3173883                                       | -0.001822754                            | 0.085353798                               |
| 60.55291129                              | 134.3665161                                       | -0.112628153                            | 0.070409418                               |
| 46.77942124                              | 76.79242802                                       | 0.262322752                             | 0.113517012                               |
| 68.70877753                              | 122.2653847                                       | -0.461559245                            | 0.073466914                               |
| 63.04886967                              | 116.2381449                                       | -0.324722825                            | 0.073961145                               |
| 63.33716898                              | 146.2398627                                       | -0.035278049                            | 0.065847472                               |
| 51.89696759                              | 125.1335608                                       | -0.897766789                            | 0.079701972                               |
| 41.95789462                              | 89.70730686                                       | 0.820507419                             | 0.099931658                               |
| 29.52697762                              | 95.73659825                                       | 0.400589462                             | 0.101426635                               |
| 65.16362696                              | 141.1139956                                       | 0.145715491                             | 0.066021433                               |
| 35.30041262                              | 94.51609612                                       | 0.388718247                             | 0.099638518                               |
| 36.15977855                              | 118.189436                                        | 0.095586294                             | 0.083816839                               |
| 44.41576675                              | 104.7983007                                       | 0.310236982                             | 0.087305069                               |
| 41.81266966                              | 110.9125061                                       | 0.295162851                             | 0.08339198                                |
| 48.17602873                              | 126.2635345                                       | -0.28481364                             | 0.075670969                               |
| 79.43961265                              | 135.0034981                                       | -0.385823963                            | 0.065363235                               |
| 83.04362012                              | 121.8922958                                       | -0.428741161                            | 0.069142654                               |
| 46.93969085                              | 108.9405787                                       | -0.122594882                            | 0.082170304                               |
| 36.3538577                               | 116.5133963                                       | 0.568536531                             | 0.098238818                               |
| 34.16393004                              | 89.76205444                                       | -0.081766353                            | 0.099213637                               |
| 54.02554423                              | 124.7453976                                       | -0.097815444                            | 0.075042481                               |
| 34.12385671                              | 73.82159853                                       | -1.359848745                            | 0.115454472                               |
| 82.07708958                              | 150.6504784                                       | -0.353725861                            | 0.060371032                               |
| 67.95240915                              | 134.6420593                                       | -0.581603582                            | 0.067659574                               |
| 53.98676486                              | 137.0635738                                       | -0.185220795                            | 0.070449641                               |
| 44.74834547                              | 121.661355                                        | -0.280021199                            | 0.083118403                               |
| 51.7497339                               | 85.38944912                                       | -0.749523028                            | 0.099755515                               |
| 84.64356387                              | 143.2955382                                       | -0.146358233                            | 0.069645686                               |
| 16.29285289                              | 79.33232212                                       | -0.479243663                            | 0.124671822                               |
| 80.7726315                               | 162.3435388                                       | 0.07030501                              | 0.057216879                               |
| 50.62380977                              | 91.49470481                                       | -1.000446093                            | 0.091337937                               |
| 88.82731795                              | 160.0840569                                       | 0.306653165                             | 0.05753276                                |
| 59.03491122                              | 144.5416145                                       | -0.163568325                            | 0.064872487                               |
| 53.20709089                              | 120.3502983                                       | -0.326888476                            | 0.075621827                               |
| 48.1974395                               | 114.1175585                                       | 0.548861137                             | 0.082789031                               |
| 60.04807716                              | 134.0311165                                       | -0.261906984                            | 0.068868385                               |
| 48.25170434                              | 116.2154522                                       | 0.154622123                             | 0.078957059                               |
| 29.61408765                              | 95.61676407                                       | 0.602391067                             | 0.105650762                               |
| 55.36349828                              | 130.5147157                                       | 0.046117088                             | 0.072147097                               |
| 42.76716016                              | 124.2519627                                       | 0.71449605                              | 0.090068187                               |
| 62.72904786                              | 142.3739777                                       | -0.369331196                            | 0.065982238                               |
| 68.94210655                              | 152.0754472                                       | 0.108608408                             | 0.061291359                               |
| 46.96855121                              | 106.5734813                                       | 0.075094363                             | 0.081274305                               |
| 45.50550894                              | 137.0360994                                       | 0.314424399                             | 0.074265517                               |
| 57.79034377                              | 158.54949                                         | 0.250795513                             | 0.068161004                               |
| 44.32709421                              | 99.43228769                                       | -0.35218686                             | 0.087397765                               |
| 65.14294168                              | 146.5083389                                       | -0.266542921                            | 0.063931023                               |
| 57.91739843                              | 106.6753769                                       | -0.903070482                            | 0.081293459                               |
| 36.23465751                              | 97.08795536                                       | -0.428899344                            | 0.089570176                               |
| 62.33010391                              | 135.6412401                                       | -0.12037485                             | 0.069846579                               |
| 49.82995946                              | 99.1415236                                        | 0.852856793                             | 0.092607437                               |
| 53.15931085                              | 133.2703218                                       | -0.055675749                            | 0.074258581                               |
| 64.64570497                              | 135.9954491                                       | -0.159690104                            | 0.070349079                               |
| 62.5491277                               | 126.0206819                                       | 0.449123592                             | 0.07327547                                |
| 36.06813747                              | 123.819665                                        | 0.221330713                             | 0.081595898                               |
| 54.06043534                              | 105.4298553                                       | -0.16297233                             | 0.089658602                               |
| 23.90518828                              | 66.70198327                                       | -0.475617304                            | 0.128427397                               |
| 67.95190056                              | 113.1226569                                       | -0.07308214                             | 0.074425651                               |
| 53.90944933                              | 124.5337315                                       | -0.523965262                            | 0.072780618                               |
| 31.21127415                              | 103.4946623                                       | 0.029685736                             | 0.09506592                                |
| 51.52726154                              | 118.1618309                                       | -0.617360508                            | 0.08044383                                |
| 62.68172281                              | 135.6344109                                       | 0.043301318                             | 0.072522753                               |
| 55.93313092                              | 113.0229635                                       | -0.93174779                             | 0.079408476                               |
| 71.14699958                              | 151.6367302                                       | -0.50762468                             | 0.062339007                               |
| 76.70023341                              | 150.3056402                                       | 0.326446951                             | 0.060927185                               |
| 46.6761332                               | 95.0449872                                        | -1.129857534                            | 0.092186185                               |
| 29.38855615                              | 94.52509022                                       | 0.148127805                             | 0.096442039                               |
| 50.59811604                              | 106.5100036                                       | 0.647986282                             | 0.090406684                               |
| 37.13697184                              | 104.3003674                                       | 0.130507517                             | 0.087184683                               |
| 104.0341539                              | 148.1895218                                       | -0.920670399                            | 0.062799116                               |
| 108.7261643                              | 149.9979897                                       | -0.862829952                            | 0.058302312                               |
| 42.91019574                              | 92.68058586                                       | -0.114133939                            | 0.089932304                               |
| 53.99163006                              | 122.1915951                                       | -0.091258891                            | 0.074400163                               |
| 42.11603875                              | 103.1214495                                       | -0.600373116                            | 0.089789416                               |
| 75.32103454                              | 145.269802                                        | -0.190035687                            | 0.061692757                               |
| 33.55363527                              | 85.52216005                                       | 0.559121991                             | 0.110793072                               |
| 75.5479762                               | 127.6255512                                       | -0.807792513                            | 0.069325493                               |
| 55.11369061                              | 141.1153803                                       | 0.076650871                             | 0.073539575                               |
| 44.68376304                              | 111.2997284                                       | -0.046577981                            | 0.08427954                                |
| 47.52156269                              | 104.6548786                                       | -0.3682568                              | 0.08474635                                |
| 40.28260147                              | 122.6119907                                       | 0.853210217                             | 0.119687182                               |
| 72.74895342                              | 145.4498334                                       | 0.116376859                             | 0.063192598                               |
| 58.42037606                              | 117.2542686                                       | -0.697844087                            | 0.075112618                               |
| 48.59517236                              | 112.6968212                                       | -0.317838747                            | 0.080048669                               |
| 49.0749084                               | 123.7522476                                       | -0.342621994                            | 0.074862153                               |
| 76.15561808                              | 134.4269679                                       | -0.422630672                            | 0.07052981                                |
| 62.93206229                              | 130.9211006                                       | 0.025877159                             | 0.068690537                               |
| 57.17884081                              | 88.31778765                                       | -1.543428767                            | 0.099839538                               |
| 26.41641065                              | 84.77245426                                       | -0.447942464                            | 0.106668622                               |
| 45.60643518                              | 123.9706073                                       | 0.368891318                             | 0.080838353                               |



| log.sigma.3.5.mm.3D_firstorder_MeanAbsoluteDeviation | log.sigma.3.5.mm.3D_firstorder_Energy | log.sigma.3.5.mm.3D_firstorder_RobustMeanAbsoluteDeviation | log.sigma.3.5.mm.3D_firstorder_Median |
|------------------------------------------------------|---------------------------------------|------------------------------------------------------------|---------------------------------------|
| 105.6514977                                          | 47488559.62                           | 66.95475426                                                | 64.05979347                           |
| 60.62936777                                          | 11938744.59                           | 38.98170526                                                | 66.77225494                           |
| 78.30400697                                          | 29239633.6                            | 55.24051711                                                | 92.17315674                           |
| 99.00157255                                          | 17659754.24                           | 66.71632305                                                | 53.17659378                           |
| 73.3049371                                           | 30145888.36                           | 47.9533809                                                 | 56.30527306                           |
| 91.06042243                                          | 12858654.87                           | 63.71548852                                                | 54.54954338                           |
| 81.88107757                                          | 102249284.2                           | 55.78304774                                                | 72.2898407                            |
| 80.89958596                                          | 10040358.6                            | 52.35419487                                                | 77.45866394                           |
| 85.41036269                                          | 91909672.24                           | 58.84234414                                                | 89.09300232                           |
| 83.73464004                                          | 23461213.76                           | 58.26870262                                                | 99.66584396                           |
| 66.991418                                            | 17339108.74                           | 46.2917905                                                 | 61.12357903                           |
| 83.89268136                                          | 50467561.74                           | 56.6371863                                                 | 92.70291901                           |
| 63.80379926                                          | 21083350.51                           | 34.96335938                                                | 39.07463074                           |
| 85.49266902                                          | 32259164.08                           | 52.46114958                                                | 63.74199677                           |
| 83.18761051                                          | 35960602.67                           | 50.73410037                                                | 74.16321564                           |
| 89.54370424                                          | 83117815.91                           | 61.80082223                                                | 69.95300674                           |
| 77.60356498                                          | 16230661.22                           | 51.39425007                                                | 76.3254776                            |
| 67.87044421                                          | 15567238.85                           | 43.20461418                                                | 49.14884567                           |
| 59.98506868                                          | 12410465.5                            | 41.70970063                                                | 50.92430305                           |
| 87.9616965                                           | 112055207.6                           | 59.38455678                                                | 85.59870148                           |
| 63.16075575                                          | 36340400.78                           | 41.55703136                                                | 59.40207672                           |
| 67.48239572                                          | 14091932.47                           | 48.23348759                                                | 72.35636902                           |
| 70.89845322                                          | 14688111.65                           | 46.02799077                                                | 63.9420681                            |
| 69.89184109                                          | 36779417.11                           | 46.9073899                                                 | 69.11595917                           |
| 79.25765388                                          | 24398655.79                           | 52.27361815                                                | 87.36894989                           |
| 91.82686498                                          | 57421652.76                           | 57.98431788                                                | 93.71837616                           |
| 90.32067512                                          | 71199509.31                           | 54.5403005                                                 | 80.46969604                           |
| 73.36736368                                          | 37507541.93                           | 47.28952135                                                | 57.621521                             |
| 66.32020753                                          | 5440767.236                           | 47.69389769                                                | 55.55714417                           |
| 59.69671074                                          | 26086043.85                           | 37.66950147                                                | 78.71772385                           |
| 79.1816714                                           | 86663086.77                           | 52.75972279                                                | 78.94381332                           |
| 57.61911235                                          | 16988616.64                           | 31.78984311                                                | 39.03234863                           |
| 97.25327439                                          | 60228560.72                           | 64.51304692                                                | 62.70568466                           |
| 89.78906506                                          | 45155018.47                           | 58.62635219                                                | 76.45421219                           |
| 81.22882266                                          | 93129918.74                           | 56.49657705                                                | 100.0624352                           |
| 74.00380863                                          | 50185802.32                           | 50.27712208                                                | 78.21938324                           |
| 67.67050068                                          | 45048919.37                           | 37.50385903                                                | 41.0646553                            |
| 95.25694335                                          | 103816451.4                           | 62.15196263                                                | 55.3491478                            |
| 46.20657669                                          | 7619646.753                           | 32.44071636                                                | 57.38124084                           |
| 98.44016672                                          | 134775655.5                           | 68.28295872                                                | 56.10678291                           |
| 72.85867975                                          | 31514890.98                           | 41.13743676                                                | 48.96446991                           |
| 99.69234422                                          | 74878544.5                            | 66.83072702                                                | 50.35873413                           |
| 87.63071045                                          | 77012372.87                           | 60.43304955                                                | 92.814888                             |
| 79.018615                                            | 36563021.05                           | 50.57378117                                                | 66.72071075                           |
| 75.72355818                                          | 27577025.74                           | 50.99229814                                                | 92.67350006                           |
| 84.62323233                                          | 62094022.76                           | 55.62122274                                                | 100.1032028                           |
| 76.88064761                                          | 80135623.12                           | 49.91209216                                                | 75.64875412                           |
| 59.46424055                                          | 9575184.291                           | 40.7779186                                                 | 55.52248764                           |
| 80.50707991                                          | 13785101.3                            | 55.00011868                                                | 69.42002869                           |
| 73.26223736                                          | 21885696.21                           | 51.99366728                                                | 69.48435211                           |
| 87.75316536                                          | 62940845.05                           | 59.43433908                                                | 108.8952713                           |
| 92.46260321                                          | 66447722.92                           | 63.09216595                                                | 74.71858215                           |
| 71.81936195                                          | 60254582.75                           | 46.7186959                                                 | 63.15680885                           |
| 78.80800746                                          | 25006332.71                           | 55.95843977                                                | 103.4848442                           |
| 87.41130921                                          | 28852892.72                           | 64.626597                                                  | 87.72160721                           |
| 69.43113222                                          | 26897542.64                           | 43.17418103                                                | 68.14887619                           |
| 89.07511317                                          | 82868502.52                           | 60.75510407                                                | 89.09174347                           |
| 77.02475459                                          | 52441224.16                           | 45.7956774                                                 | 65.23049545                           |
| 66.52194979                                          | 16710762.59                           | 42.09779624                                                | 48.80064201                           |
| 84.53511182                                          | 131667044.8                           | 57.41494048                                                | 46.78379059                           |
| 73.38834957                                          | 25872446.38                           | 44.93751935                                                | 51.2157135                            |
| 80.1007934                                           | 48605124.05                           | 55.77785547                                                | 79.09741592                           |
| 84.99838529                                          | 125138299.9                           | 57.41365334                                                | 87.44882965                           |
| 84.06715814                                          | 125690411.8                           | 54.87418729                                                | 49.75107574                           |
| 70.27947633                                          | 12681436.84                           | 49.83693481                                                | 86.60357666                           |
| 74.13877937                                          | 55372257.47                           | 45.4161804                                                 | 49.54264069                           |
| 48.87885012                                          | 8021634.661                           | 28.812266                                                  | 33.71596527                           |
| 82.27845153                                          | 96060674.32                           | 50.06955674                                                | 50.9044838                            |
| 80.85635148                                          | 100952204.9                           | 52.15873943                                                | 80.67102814                           |
| 61.85294182                                          | 33038142.53                           | 42.65097911                                                | 65.1553421                            |
| 75.73835263                                          | 18344500.98                           | 49.5062041                                                 | 60.19252777                           |
| 85.5994927                                           | 96973954.42                           | 56.97203243                                                | 89.13317871                           |
| 77.58295299                                          | 40606617.62                           | 48.08344798                                                | 83.32965088                           |
| 96.02258434                                          | 36738375.17                           | 64.3948082                                                 | 50.1427803                            |
| 94.46973611                                          | 54809261.04                           | 63.68868511                                                | 43.35200882                           |
| 68.1610435                                           | 16107606.87                           | 41.46487001                                                | 67.98366165                           |
| 60.30288727                                          | 30205395.65                           | 40.10466279                                                | 75.23604965                           |
| 73.03765017                                          | 14028531.93                           | 46.63862129                                                | 55.21418381                           |
| 66.84525433                                          | 21879746.8                            | 44.78993252                                                | 65.13065338                           |
| 104.3497516                                          | 46779721.46                           | 65.89801156                                                | 58.36322403                           |
| 106.5676353                                          | 45648317.78                           | 66.60192985                                                | 64.46915436                           |
| 69.8386955                                           | 18728930.84                           | 41.43889733                                                | 34.94905472                           |
| 79.40182128                                          | 57423186.44                           | 51.69369262                                                | 78.34178925                           |
| 66.46234075                                          | 35387612.97                           | 42.67233821                                                | 67.95719147                           |
| 93.26532225                                          | 47511985.6                            | 62.01884475                                                | 71.85746765                           |
| 59.89106542                                          | 15708845.23                           | 39.04016903                                                | 48.53153229                           |
| 90.508241                                            | 37868222.56                           | 55.56103576                                                | 41.4390274                            |
| 83.61265578                                          | 59934411.1                            | 58.28288519                                                | 89.42153168                           |
| 70.74153998                                          | 22366011.15                           | 46.6773107                                                 | 75.12208176                           |
| 72.13974376                                          | 29656943.22                           | 45.34497267                                                | 68.81984711                           |
| 72.81726097                                          | 17313104.96                           | 52.69346522                                                | 40.3957119                            |
| 90.59134111                                          | 54938213.31                           | 62.04960962                                                | 92.93805313                           |
| 79.72513971                                          | 71787828.46                           | 50.07168493                                                | 54.82818222                           |
| 74.96100657                                          | 56616159.53                           | 48.28304876                                                | 81.67711639                           |
| 77.00790408                                          | 49854646.96                           | 52.55011253                                                | 52.03662109                           |
| 90.25121564                                          | 68548687.69                           | 57.97202059                                                | 61.83439827                           |
| 83.58027345                                          | 41742325.94                           | 55.67605985                                                | 58.68760681                           |
| 69.90069481                                          | 11166425.13                           | 37.85192709                                                | 29.42769241                           |
| 54.4756368                                           | 5954402.452                           | 36.09138781                                                | 49.43175888                           |
| 76.08745979                                          | 96198796.1                            | 52.87781335                                                | 71.48194504                           |

| log.sigma.3.5.mm.3D_firstorder_TotalEnergy | log.sigma.3.5.mm.3D_firstorder_Maximum | log.sigma.3.5.mm.3D_firstorder_RootMeanSquared | log.sigma.3.5.mm.3D_firstorder_90Percentile | log.sigma.3.5.mm.3D_firstorder_Minimum |
|--------------------------------------------|----------------------------------------|------------------------------------------------|---------------------------------------------|----------------------------------------|
| 1282191110                                 | 410.0094299                            | 149.5966295                                    | 216.4841293                                 | -503.5231018                           |
| 323246104                                  | 341.9428101                            | 112.9987203                                    | 196.5440857                                 | -141.4835815                           |
| 789470107.2                                | 445.6513672                            | 138.0617212                                    | 220.5761368                                 | -202.4212341                           |
| 476813364.6                                | 409.8947449                            | 134.4451209                                    | 199.5477936                                 | -360.1641235                           |
| 813938985.8                                | 352.4078369                            | 112.8296379                                    | 185.3945267                                 | -312.1375122                           |
| 347183681.6                                | 436.5918884                            | 139.5808383                                    | 246.9076431                                 | -195.380722                            |
| 2760730674                                 | 643.6475883                            | 134.5139992                                    | 223.3204193                                 | -336.388855                            |
| 2710895542                                 | 444.2791443                            | 140.2003395                                    | 235.6431168                                 | -447.4979248                           |
| 2481561150                                 | 455.5281677                            | 142.188965                                     | 230.5516052                                 | -414.1246338                           |
| 633452771.5                                | 411.4424744                            | 147.9373536                                    | 239.8444977                                 | -469.0576172                           |
| 468155935.9                                | 315.0963745                            | 107.2291132                                    | 180.8773636                                 | -204.8897705                           |
| 1362624167                                 | 479.4977112                            | 147.9689856                                    | 244.7137085                                 | -340.2223511                           |
| 569250463.9                                | 388.5639343                            | 106.2668129                                    | 168.4257385                                 | -339.3166809                           |
| 870997430.3                                | 402.508667                             | 137.0696826                                    | 215.0454102                                 | -436.5730286                           |
| 970936272.1                                | 514.2729492                            | 134.6302483                                    | 204.7392975                                 | -382.8020325                           |
| 2244181029                                 | 451.9908142                            | 137.8187811                                    | 231.5539017                                 | -329.0904541                           |
| 438227853                                  | 336.1147461                            | 116.5912459                                    | 167.0660263                                 | -338.2470093                           |
| 420315448.9                                | 358.431488                             | 112.3632406                                    | 207.7801147                                 | -159.522211                            |
| 335082568.6                                | 283.0530396                            | 97.78149875                                    | 174.1219666                                 | -160.3407593                           |
| 3025490606                                 | 509.7258301                            | 146.8101606                                    | 246.7065613                                 | -276.7123413                           |
| 981190821.1                                | 419.5334167                            | 109.6235755                                    | 187.3390442                                 | -207.9090424                           |
| 380482176.8                                | 303.955719                             | 114.2811375                                    | 194.0171234                                 | -152.2032166                           |
| 396579014.7                                | 380.5227051                            | 119.7658509                                    | 213.3061554                                 | -198.9122467                           |
| 993044261.9                                | 416.9578857                            | 117.8760164                                    | 194.8193939                                 | -251.2406158                           |
| 658763706.2                                | 438.311615                             | 138.4422816                                    | 221.4049316                                 | -335.2404175                           |
| 1550384624                                 | 528.9837646                            | 155.6880625                                    | 241.0820404                                 | -460.7980652                           |
| 1922386751                                 | 523.8648071                            | 148.400597                                     | 229.6509979                                 | -437.6412659                           |
| 1012703632                                 | 404.9270935                            | 116.5326076                                    | 191.6310806                                 | -374.5477905                           |
| 146900715.4                                | 301.5163269                            | 110.3256035                                    | 202.9675544                                 | -136.2372131                           |
| 704323184                                  | 362.6066895                            | 112.6948034                                    | 178.5186813                                 | -282.675415                            |
| 2339903343                                 | 429.712738                             | 134.9599343                                    | 222.5661377                                 | -404.9838867                           |
| 458692649.4                                | 331.8594971                            | 90.6147221                                     | 115.1312347                                 | -421.7218628                           |
| 1626171140                                 | 460.8030396                            | 136.5737455                                    | 206.2159698                                 | -401.4533386                           |
| 1219185499                                 | 391.1362305                            | 138.6178253                                    | 213.9475449                                 | -398.1331177                           |
| 2514507806                                 | 443.262085                             | 144.4189341                                    | 237.2590698                                 | -311.4228516                           |
| 1355016663                                 | 384.8213196                            | 129.3606541                                    | 214.5011108                                 | -388.4504089                           |
| 1216320823                                 | 459.2010803                            | 110.0303144                                    | 154.5361328                                 | -554.6192627                           |
| 2803044188                                 | 551.343811                             | 141.8293656                                    | 235.8460541                                 | -503.9164124                           |
| 205730462.3                                | 224.1850281                            | 78.70727259                                    | 121.4906044                                 | -180.7875366                           |
| 3638942697                                 | 486.714325                             | 136.1565445                                    | 191.2511673                                 | -303.368866                            |
| 850902056.5                                | 380.8664551                            | 110.2231755                                    | 142.5052429                                 | -419.3068542                           |
| 2021720701                                 | 565.7232056                            | 139.1526915                                    | 208.3591248                                 | -397.7322998                           |
| 2079334068                                 | 433.1340027                            | 145.1962555                                    | 235.7141937                                 | -353.1847229                           |
| 987201568.3                                | 582.7074616                            | 121.2260203                                    | 179.7214081                                 | -394.4003296                           |
| 744579695.1                                | 454.2940979                            | 146.8954302                                    | 259.1204681                                 | -152.37677                             |
| 1676538614                                 | 470.1631775                            | 150.4020389                                    | 238.2002594                                 | -337.0348206                           |
| 2163661824                                 | 439.579834                             | 132.5363996                                    | 216.6980377                                 | -355.5513916                           |
| 258529975.9                                | 308.7401123                            | 104.8490484                                    | 184.5527496                                 | -106.684433                            |
| 372197735.2                                | 369.0986633                            | 127.2741487                                    | 211.5262299                                 | -225.7619781                           |
| 590913797.6                                | 459.9061279                            | 127.2306768                                    | 215.5206238                                 | -148.5761108                           |
| 1699402816                                 | 423.959259                             | 156.5251875                                    | 247.2674622                                 | -322.0590515                           |
| 1794088519                                 | 516.1886597                            | 140.3979204                                    | 232.2022552                                 | -338.9747009                           |
| 1626873734                                 | 440.4127197                            | 115.5607884                                    | 193.3533279                                 | -292.4355164                           |
| 675170983.1                                | 445.1685791                            | 150.5013744                                    | 252.7135269                                 | -147.225708                            |
| 779028103.5                                | 396.7676086                            | 147.288507                                     | 249.864064                                  | -182.2866516                           |
| 726233651.2                                | 432.9271851                            | 117.4462073                                    | 192.3995895                                 | -469.8951111                           |
| 2237449568                                 | 396.355011                             | 143.1315856                                    | 229.4782837                                 | -313.8769226                           |
| 1415913052                                 | 373.8796692                            | 123.1470226                                    | 181.4358536                                 | -394.3968506                           |
| 451190589.9                                | 341.044342                             | 100.6976953                                    | 157.2452454                                 | -311.0436707                           |
| 3555010210                                 | 457.5775757                            | 120.095557                                     | 191.2809509                                 | -473.2821655                           |
| 698556052.3                                | 534.6196899                            | 121.0384624                                    | 209.6853104                                 | -260.0330505                           |
| 1312338349                                 | 446.2684326                            | 134.9228161                                    | 229.1203247                                 | -343.4910278                           |
| 3378734096                                 | 486.5759277                            | 147.025732                                     | 243.6539368                                 | -437.8670044                           |
| 3393641117                                 | 483.4244385                            | 128.406827                                     | 226.6746735                                 | -448.2114868                           |
| 342398794.8                                | 344.3640747                            | 126.6982703                                    | 204.3100174                                 | -185.3887177                           |
| 1495050952                                 | 402.2637329                            | 119.7402002                                    | 199.4747116                                 | -457.7776489                           |
| 216584135.9                                | 268.8856812                            | 78.4318833                                     | 119.8793549                                 | -314.1813965                           |
| 2593638207                                 | 553.8381958                            | 123.974626                                     | 190.6649414                                 | -487.2800598                           |
| 2725709531                                 | 468.5256958                            | 131.2865671                                    | 201.0212341                                 | -445.2181091                           |
| 892029848.3                                | 314.5148621                            | 106.7723056                                    | 178.6321732                                 | -273.5240173                           |
| 495301526.4                                | 365.1972961                            | 118.8360959                                    | 185.5925629                                 | -360.4774475                           |
| 2618296769                                 | 474.0854187                            | 150.3484332                                    | 249.7421494                                 | -388.0160522                           |
| 1096378676                                 | 379.9125061                            | 133.4830881                                    | 206.0942383                                 | -444.5875549                           |
| 991936129.7                                | 350.1369324                            | 127.5269159                                    | 178.9642761                                 | -381.7398682                           |
| 1479850048                                 | 494.0630188                            | 132.3077974                                    | 214.5696259                                 | -302.7182617                           |
| 434905385.4                                | 290.774353                             | 109.5567783                                    | 155.8870941                                 | -338.83078                             |
| 815545682.5                                | 357.0722961                            | 112.2790831                                    | 183.9925537                                 | -210.8187866                           |
| 378770362.2                                | 413.8905334                            | 112.0105843                                    | 204.0270035                                 | -218.5994415                           |
| 590753163.5                                | 345.6480713                            | 113.215108                                     | 191.7981232                                 | -234.519928                            |
| 1263052479                                 | 406.9779053                            | 141.4209352                                    | 173.4501556                                 | -499.8795166                           |
| 1232504580                                 | 396.1825256                            | 151.4938481                                    | 215.161969                                  | -483.3044434                           |
| 505681132.6                                | 534.5755005                            | 102.03306                                      | 135.2167938                                 | -321.0767517                           |
| 1550426034                                 | 441.3543091                            | 132.5367094                                    | 213.1026276                                 | -389.1038513                           |
| 955465550.2                                | 331.4649048                            | 107.3110278                                    | 164.6668213                                 | -295.7111511                           |
| 1282823611                                 | 529.0391846                            | 139.5711607                                    | 220.3841705                                 | -350.3725891                           |
| 424138821.1                                | 278.12854                              | 101.2611249                                    | 185.8087769                                 | -236.2680969                           |
| 1022442009                                 | 359.5686951                            | 126.0065929                                    | 166.3069153                                 | -414.3453979                           |
| 1618229100                                 | 455.0037231                            | 147.8442355                                    | 244.5028702                                 | -294.260376                            |
| 603882301.1                                | 379.1362305                            | 123.6014968                                    | 210.8217575                                 | -248.571991                            |
| 800737466.8                                | 397.6210938                            | 121.0181972                                    | 195.4808899                                 | -328.2514954                           |
| 467453833.8                                | 336.1780396                            | 115.2255223                                    | 220.3985504                                 | -117.2792892                           |
| 1483331759                                 | 448.9022827                            | 151.8680397                                    | 256.2057343                                 | -242.9221191                           |
| 1938271368                                 | 402.4675293                            | 117.6887103                                    | 171.6412933                                 | -473.2010193                           |
| 1528636307                                 | 401.8978271                            | 130.9824873                                    | 212.360025                                  | -360.8925781                           |
| 1346075468                                 | 382.615509                             | 107.0307033                                    | 160.9647797                                 | -311.2259521                           |
| 1850814568                                 | 450.5172424                            | 141.5336054                                    | 235.6811127                                 | -431.9875793                           |
| 1127042800                                 | 395.6610107                            | 121.7292368                                    | 191.8709595                                 | -263.0683289                           |
| 301493478.6                                | 229.4817505                            | 103.2722736                                    | 115.3558853                                 | -450.3970032                           |
| 160768866.2                                | 229.104126                             | 84.49598384                                    | 129.7712265                                 | -238.5861511                           |
| 2597367495                                 | 413.3182983                            | 129.0762765                                    | 225.4056427                                 | -283.677063                            |

| log.sigma.3.5.mm.3D_firstorder_Entropy | log.sigma.3.5.mm.3D_firstorder_StandardDeviation | log.sigma.3.5.mm.3D_firstorder_Range | log.sigma.3.5.mm.3D_firstorder_Variance | log.sigma.3.5.mm.3D_firstorder_10Percentile |
|----------------------------------------|--------------------------------------------------|--------------------------------------|-----------------------------------------|---------------------------------------------|
| 4.448701722                            | 141.342744                                       | 913.5325317                          | 19977.77128                             | -142.131308                                 |
| 3.60192867                             | 79.24583806                                      | 483.4263916                          | 6279.90285                              | -9.665810585                                |
| 4.002384765                            | 97.6793139                                       | 648.0726013                          | 9541.248365                             | -23.8947897                                 |
| 4.323989491                            | 127.3481712                                      | 770.0588684                          | 16217.55671                             | -149.9190094                                |
| 3.961319198                            | 96.19035578                                      | 664.5453491                          | 9252.584545                             | -56.13325233                                |
| 4.07576547                             | 112.5991322                                      | 681.9726105                          | 12678.56458                             | -44.80485649                                |
| 4.079521807                            | 104.7030666                                      | 980.036438                           | 10962.73216                             | -33.62533188                                |
| 4.066331526                            | 107.1321733                                      | 891.7770691                          | 11477.30256                             | -17.71442032                                |
| 4.156342595                            | 109.0606729                                      | 869.6528015                          | 11894.23037                             | -40.41276169                                |
| 4.051663608                            | 107.858278                                       | 880.5000916                          | 11633.40813                             | -11.6814414                                 |
| 3.791799545                            | 84.93192816                                      | 519.986145                           | 7213.43242                              | -36.70404739                                |
| 4.120699608                            | 108.2309287                                      | 819.7200623                          | 11713.93392                             | -20.96783447                                |
| 3.694202895                            | 92.72581104                                      | 727.8806152                          | 8598.076033                             | -28.04284363                                |
| 4.163758083                            | 117.7255541                                      | 839.0816956                          | 13859.30609                             | -50.89553757                                |
| 4.151422537                            | 114.0138105                                      | 897.0749817                          | 12999.14899                             | -74.69878387                                |
| 4.193053991                            | 112.8601034                                      | 781.0812683                          | 12737.40293                             | -53.79929733                                |
| 3.943666009                            | 100.3868669                                      | 674.3617554                          | 10077.52305                             | -67.97870178                                |
| 3.701911411                            | 88.81219637                                      | 517.953598                           | 7887.606225                             | -23.23692017                                |
| 3.55747177                             | 74.88564204                                      | 443.3937988                          | 5607.859384                             | -25.58052864                                |
| 4.197124835                            | 112.5660425                                      | 786.4381714                          | 12671.11393                             | -38.3911644                                 |
| 3.685808926                            | 82.12136035                                      | 627.4424591                          | 6743.917826                             | -14.78851147                                |
| 3.764910887                            | 83.45946739                                      | 456.1589355                          | 6965.482696                             | -24.19632835                                |
| 3.852994144                            | 92.43671968                                      | 579.4349518                          | 8544.547144                             | -26.89244022                                |
| 3.872042588                            | 90.17400227                                      | 668.1985016                          | 8131.350685                             | -28.09239578                                |
| 4.039368584                            | 104.2079501                                      | 773.5520325                          | 10859.29686                             | -23.30758896                                |
| 4.292358068                            | 124.7346725                                      | 989.7818298                          | 15558.73853                             | -46.64670792                                |
| 4.262726342                            | 124.8426175                                      | 961.506703                           | 15585.67914                             | -61.8958046                                 |
| 3.951312874                            | 97.10153572                                      | 779.474884                           | 9428.708239                             | -44.36298676                                |
| 3.591432235                            | 81.17572092                                      | 437.75354                            | 6589.497667                             | -12.14028435                                |
| 3.681798093                            | 80.18619702                                      | 645.2821045                          | 6429.826192                             | -9.93055191                                 |
| 4.049770883                            | 103.1237612                                      | 834.6966248                          | 10634.51012                             | -27.58876953                                |
| 3.579328033                            | 85.49240957                                      | 753.5813599                          | 7308.952094                             | -61.4633461                                 |
| 4.340826323                            | 126.0078581                                      | 862.2563782                          | 15877.98031                             | -128.0601074                                |
| 4.204313372                            | 118.1604417                                      | 789.2693481                          | 13961.88997                             | -88.15756226                                |
| 4.067343416                            | 102.7144822                                      | 754.6849365                          | 10550.26485                             | -20.34927368                                |
| 3.899971613                            | 95.90773016                                      | 773.2717285                          | 9198.292704                             | -9.421392059                                |
| 3.838252239                            | 101.328761                                       | 1013.820343                          | 10267.5178                              | -47.28913498                                |
| 4.246837392                            | 124.7944367                                      | 1055.260223                          | 15573.65143                             | -75.09049225                                |
| 3.237764857                            | 58.35000947                                      | 404.9725647                          | 3404.723605                             | -19.29519043                                |
| 4.34949437                             | 123.8257553                                      | 790.0831909                          | 15332.81768                             | -102.8566254                                |
| 3.917038219                            | 103.9807053                                      | 1008.1733093                         | 10811.98707                             | -92.9009491                                 |
| 4.390039157                            | 129.3419561                                      | 963.4555054                          | 16729.34161                             | -113.1404205                                |
| 4.18518406                             | 110.9130145                                      | 786.3187256                          | 12301.69678                             | -40.8869751                                 |
| 4.056801451                            | 105.7148359                                      | 977.1079712                          | 11175.62653                             | -79.47033997                                |
| 3.901793081                            | 96.74185571                                      | 606.6708679                          | 9358.986647                             | -4.215427078                                |
| 4.157350659                            | 111.2451838                                      | 807.1979998                          | 12375.49093                             | -27.59273872                                |
| 4.006925734                            | 100.0454675                                      | 795.1312256                          | 10210.18651                             | -24.80172501                                |
| 3.535477507                            | 74.84296432                                      | 415.4245543                          | 5601.469308                             | -8.04920578                                 |
| 4.048532696                            | 102.1007743                                      | 594.8606415                          | 10424.56811                             | -51.47443008                                |
| 3.782888128                            | 90.45368243                                      | 608.4822388                          | 8181.868664                             | -5.286004591                                |
| 4.18614037                             | 113.0734964                                      | 746.0183105                          | 12785.61559                             | -24.50069542                                |
| 4.279678601                            | 118.2993643                                      | 855.1633606                          | 13994.7396                              | -77.16677094                                |
| 3.930517331                            | 94.12408141                                      | 732.8482361                          | 8859.342701                             | -44.77539215                                |
| 3.970799124                            | 97.4753969                                       | 592.3942871                          | 9501.453001                             | -1.177976441                                |
| 4.067106027                            | 105.1240862                                      | 579.0542603                          | 11051.0735                              | -17.91672459                                |
| 3.891378648                            | 94.78999579                                      | 902.8222961                          | 8985.143302                             | -40.46688957                                |
| 4.212273736                            | 113.4904983                                      | 710.2319336                          | 12880.09321                             | -56.8148915                                 |
| 4.020742462                            | 108.1834927                                      | 768.2765198                          | 11703.6681                              | -61.31566277                                |
| 3.823798241                            | 89.2468923                                       | 652.0880127                          | 7965.007785                             | -58.89805031                                |
| 4.132807024                            | 108.2908012                                      | 930.8597412                          | 11726.89763                             | -72.1974411                                 |
| 3.865935032                            | 98.67036258                                      | 794.6527405                          | 9735.840451                             | -34.69363403                                |
| 4.02240389                             | 101.29645                                        | 789.7594604                          | 10260.97079                             | -28.2765934                                 |
| 4.13250493                             | 109.9610769                                      | 924.4429321                          | 12091.43842                             | -24.16074829                                |
| 4.104328549                            | 110.111982                                       | 931.6359253                          | 12124.64857                             | -51.94100952                                |
| 3.817162653                            | 87.19226684                                      | 592.7527924                          | 7602.491397                             | -20.27738571                                |
| 3.924404018                            | 102.1761598                                      | 860.0413818                          | 10439.96763                             | -34.85318794                                |
| 3.394156139                            | 69.91512907                                      | 583.0670776                          | 4888.125273                             | -39.48727913                                |
| 4.155419632                            | 113.1225425                                      | 1041.118256                          | 12796.70961                             | -86.81429062                                |
| 4.095764398                            | 107.1639248                                      | 913.7438049                          | 11484.10677                             | -58.03996811                                |
| 3.66782846                             | 78.78758246                                      | 588.0388794                          | 6207.483151                             | -14.87008333                                |
| 3.966553198                            | 101.2960572                                      | 725.6747437                          | 10260.89119                             | -45.12471008                                |
| 4.125025472                            | 111.2015803                                      | 862.1014709                          | 12365.79146                             | -13.09674549                                |
| 4.013743492                            | 107.1786382                                      | 824.5000661                          | 11487.26049                             | -35.67886963                                |
| 4.289351436                            | 123.0892951                                      | 731.8768005                          | 15150.97456                             | -138.3013885                                |
| 4.304266921                            | 121.3929752                                      | 796.7812805                          | 14736.25442                             | -97.03456879                                |
| 3.804946527                            | 93.94465484                                      | 629.6051331                          | 8825.598173                             | -60.23834724                                |
| 3.673591936                            | 78.42577458                                      | 567.8910828                          | 6150.602119                             | -11.36496115                                |
| 3.859579096                            | 96.05284786                                      | 632.489975                           | 9226.149582                             | -23.94384918                                |
| 3.80007405                             | 86.07458923                                      | 580.1679993                          | 7408.83491                              | -26.13959846                                |
| 4.356455723                            | 137.9189421                                      | 906.8754219                          | 19021.6346                              | -176.1725281                                |
| 4.443669214                            | 143.7312553                                      | 879.486969                           | 20658.67376                             | -144.7560638                                |
| 3.893763919                            | 97.72312871                                      | 855.6525222                          | 9549.809885                             | -87.3577652                                 |
| 4.073660373                            | 104.6955745                                      | 830.4581604                          | 10961.16331                             | -36.96408997                                |
| 3.804012288                            | 88.18248176                                      | 627.1760559                          | 7776.15009                              | -53.12801895                                |
| 4.30168489                             | 121.1440226                                      | 879.4117737                          | 14675.8742                              | -89.30335999                                |
| 3.533135639                            | 77.72104817                                      | 514.396637                           | 6040.561328                             | -14.49165955                                |
| 4.214713655                            | 122.7679665                                      | 773.914093                           | 15071.97361                             | -143.7227203                                |
| 4.061922483                            | 105.0209583                                      | 749.2460991                          | 11029.40169                             | -11.36251154                                |
| 3.884866578                            | 92.37837661                                      | 627.7082214                          | 8533.764465                             | -23.96807156                                |
| 3.929534384                            | 97.63854476                                      | 725.8725891                          | 9533.285423                             | -37.47844009                                |
| 3.47068302                             | 87.40698483                                      | 453.4573288                          | 7639.980997                             | -9.933507347                                |
| 4.229207863                            | 115.0293047                                      | 691.8244019                          | 13231.74094                             | -41.38082199                                |
| 4.082760957                            | 107.726672                                       | 875.6685486                          | 11605.03587                             | -86.34072266                                |
| 3.986784625                            | 100.0326798                                      | 762.7904053                          | 10006.53702                             | -32.34179077                                |
| 3.99731091                             | 97.92584267                                      | 693.8414612                          | 9589.470662                             | -88.33401413                                |
| 4.201437375                            | 121.1899983                                      | 882.5048218                          | 14687.01569                             | -51.2043293                                 |
| 4.135187758                            | 107.9425605                                      | 658.7293396                          | 11651.59636                             | -85.86853638                                |
| 3.77098847                             | 102.3140621                                      | 679.8787537                          | 10468.16731                             | -105.9483307                                |
| 3.512105171                            | 70.81433746                                      | 467.6902771                          | 5014.67039                              | -41.72285042                                |
| 3.916955545                            | 95.37674756                                      | 696.9953613                          | 9096.723975                             | -17.53726368                                |

| log.sigma.3.5.mm.3D_firstorder_Kurtosis | log.sigma.3.5.mm.3D_firstorder_Mean | log.sigma.3.5.mm.3D_glrIm_ShortRunLowGrayLevelEmphasis | log.sigma.3.5.mm.3D_glrIm_GrayLevelVariance |
|-----------------------------------------|-------------------------------------|--------------------------------------------------------|---------------------------------------------|
| 4.045371589                             | 49.00388032                         | 0.003428687                                            | 33.47998754                                 |
| 3.411920036                             | 80.55313738                         | 0.016665035                                            | 10.74722828                                 |
| 3.055050567                             | 97.5694137                          | 0.008343572                                            | 15.91278905                                 |
| 3.012104015                             | 43.10375638                         | 0.007738942                                            | 26.65899947                                 |
| 3.598597717                             | 58.97408443                         | 0.005666733                                            | 15.50646055                                 |
| 2.862683361                             | 82.48785266                         | 0.014135279                                            | 21.1499144                                  |
| 3.668443463                             | 84.44692897                         | 0.003816089                                            | 18.25575172                                 |
| 4.217164772                             | 90.43689865                         | 0.002455974                                            | 19.46257817                                 |
| 3.504009392                             | 91.23306089                         | 0.002791107                                            | 19.64615619                                 |
| 4.955672337                             | 101.2524196                         | 0.003115228                                            | 19.35865277                                 |
| 3.027280364                             | 65.45724021                         | 0.010280817                                            | 11.97679765                                 |
| 3.580350012                             | 100.9003805                         | 0.004317067                                            | 19.65015033                                 |
| 5.367776502                             | 51.90914646                         | 0.005070684                                            | 15.49321439                                 |
| 4.890585397                             | 70.20535453                         | 0.004905597                                            | 23.75918662                                 |
| 4.255725057                             | 71.59717018                         | 0.00452621                                             | 21.90839566                                 |
| 3.081036702                             | 79.09875788                         | 0.004409753                                            | 21.14713405                                 |
| 4.117675516                             | 59.29583089                         | 0.006319698                                            | 16.74844756                                 |
| 3.490921995                             | 68.83234431                         | 0.014423489                                            | 13.34781402                                 |
| 2.750625775                             | 62.87576731                         | 0.013281238                                            | 9.320700974                                 |
| 3.246825418                             | 94.24494317                         | 0.005303507                                            | 21.07370121                                 |
| 3.808160337                             | 72.61825166                         | 0.008870057                                            | 11.63422516                                 |
| 2.6609337                               | 78.06853197                         | 0.014094175                                            | 11.39340017                                 |
| 3.279000417                             | 76.15321328                         | 0.012743931                                            | 14.30089072                                 |
| 3.645118556                             | 75.91708997                         | 0.006329883                                            | 13.72335016                                 |
| 4.283453053                             | 91.14257228                         | 0.0060949                                              | 18.10730551                                 |
| 4.706840086                             | 93.1667015                          | 0.002956321                                            | 26.04304137                                 |
| 4.62045918                              | 80.23127848                         | 0.003277904                                            | 26.29985869                                 |
| 3.856182401                             | 64.42934422                         | 0.003948083                                            | 15.90492114                                 |
| 2.638164995                             | 74.71439698                         | 0.018462736                                            | 10.88185265                                 |
| 4.248640761                             | 79.18517871                         | 0.005205995                                            | 10.95871666                                 |
| 3.9317226                               | 87.06132169                         | 0.002766498                                            | 17.90595282                                 |
| 7.253881463                             | 30.03457619                         | 0.005076063                                            | 12.98996233                                 |
| 3.272337723                             | 52.67264615                         | 0.004199935                                            | 26.12193204                                 |
| 3.862241127                             | 72.47766211                         | 0.005370956                                            | 23.50950593                                 |
| 3.354840787                             | 102.9388242                         | 0.004711213                                            | 17.46400677                                 |
| 4.343350769                             | 86.80948179                         | 0.003523349                                            | 15.53860002                                 |
| 6.915278494                             | 42.88533878                         | 0.00197458                                             | 18.18596526                                 |
| 3.723740794                             | 67.39374993                         | 0.002097879                                            | 26.8597344                                  |
| 3.780618246                             | 52.82150276                         | 0.012599081                                            | 5.777044325                                 |
| 2.890034253                             | 56.61966906                         | 0.006311492                                            | 25.08488219                                 |
| 5.43233025                              | 36.56721672                         | 0.0049766                                              | 18.77662769                                 |
| 3.686897837                             | 51.32377562                         | 0.004039071                                            | 27.35706652                                 |
| 3.263012964                             | 93.70301932                         | 0.003607592                                            | 20.29377466                                 |
| 4.406662473                             | 59.33061163                         | 0.003878212                                            | 18.61128183                                 |
| 3.097537755                             | 110.5408556                         | 0.010385497                                            | 15.5476693                                  |
| 3.972608435                             | 101.2189824                         | 0.004586206                                            | 20.66232659                                 |
| 3.92401119                              | 85.76544008                         | 0.003476866                                            | 17.25134384                                 |
| 3.042246345                             | 73.42924243                         | 0.024003086                                            | 9.597282066                                 |
| 3.030225673                             | 75.98776762                         | 0.009833587                                            | 17.26349088                                 |
| 3.51844277                              | 89.47500466                         | 0.0158819                                              | 13.88271511                                 |
| 3.706294213                             | 108.2336303                         | 0.0061215                                              | 21.15561702                                 |
| 3.236623289                             | 75.60976435                         | 0.004676831                                            | 22.95884741                                 |
| 3.493015495                             | 67.04441156                         | 0.005651386                                            | 14.77145353                                 |
| 2.916141367                             | 114.6700078                         | 0.017406379                                            | 15.57798314                                 |
| 2.512872497                             | 103.1640965                         | 0.010907692                                            | 18.03767646                                 |
| 4.87488353                              | 69.3431201                          | 0.002822564                                            | 15.22451498                                 |
| 3.211013542                             | 87.21558119                         | 0.006279487                                            | 21.31124131                                 |
| 5.220163068                             | 58.8346928                          | 0.006195517                                            | 19.86429395                                 |
| 4.271762018                             | 46.63708886                         | 0.007898666                                            | 13.61622107                                 |
| 3.699902664                             | 51.92345492                         | 0.002518792                                            | 19.73529541                                 |
| 4.433028927                             | 70.10327338                         | 0.006459103                                            | 16.77449997                                 |
| 3.25828421                              | 89.12460673                         | 0.004045331                                            | 17.09682377                                 |
| 4.08092534                              | 97.59675944                         | 0.002726857                                            | 20.07414245                                 |
| 3.757148659                             | 66.05804007                         | 0.002590149                                            | 20.30150944                                 |
| 2.937305165                             | 91.92366563                         | 0.009810918                                            | 12.5741694                                  |
| 5.229364252                             | 62.43194635                         | 0.002730435                                            | 18.16593487                                 |
| 6.289667126                             | 35.54483155                         | 0.00778406                                             | 8.740160295                                 |
| 4.335970505                             | 50.72473045                         | 0.002549335                                            | 21.66202358                                 |
| 4.0677822                               | 75.84230954                         | 0.002726532                                            | 19.322475                                   |
| 3.55170685                              | 72.0613772                          | 0.006248854                                            | 10.60600053                                 |
| 4.710626553                             | 62.1379634                          | 0.006040006                                            | 17.28156747                                 |
| 3.919995785                             | 101.1872518                         | 0.003166764                                            | 20.81725687                                 |
| 5.639896634                             | 79.56427789                         | 0.003791942                                            | 19.56019351                                 |
| 3.251979147                             | 33.34875895                         | 0.006099583                                            | 25.03862398                                 |
| 3.269079984                             | 52.62222759                         | 0.006355223                                            | 24.10056744                                 |
| 5.222616384                             | 56.36567668                         | 0.007725908                                            | 15.01692186                                 |
| 3.616482654                             | 80.34917789                         | 0.008113576                                            | 10.50233501                                 |
| 3.948902705                             | 73.60307014                         | 0.011482365                                            | 15.72164914                                 |
| 3.314773923                             | 73.54471959                         | 0.008233024                                            | 12.4371839                                  |
| 4.019648                                | 31.27692943                         | 0.003980719                                            | 31.28031967                                 |
| 4.134339307                             | 47.87183149                         | 0.004150585                                            | 34.38091065                                 |
| 5.067676213                             | 29.34170136                         | 0.008846742                                            | 16.34901362                                 |
| 4.075946911                             | 81.27001918                         | 0.003447963                                            | 18.46006063                                 |
| 4.003449338                             | 61.1515052                          | 0.006674925                                            | 12.88949702                                 |
| 3.419154673                             | 69.31258685                         | 0.004610892                                            | 24.25524334                                 |
| 3.375566257                             | 64.90958399                         | 0.006908009                                            | 10.31515693                                 |
| 4.052567152                             | 28.38464092                         | 0.006075033                                            | 25.4519684                                  |
| 3.230234538                             | 104.0601571                         | 0.005240933                                            | 18.42938732                                 |
| 3.491815787                             | 82.11921551                         | 0.008852536                                            | 14.38485799                                 |
| 4.456977357                             | 71.49908135                         | 0.005568457                                            | 16.24098186                                 |
| 2.655516451                             | 75.07955768                         | 0.019620867                                            | 12.94110897                                 |
| 3.014403786                             | 99.15725153                         | 0.00941014                                             | 21.68911489                                 |
| 4.579928703                             | 47.38772702                         | 0.002964299                                            | 19.57926508                                 |
| 4.079720399                             | 84.55693325                         | 0.003828451                                            | 16.85785858                                 |
| 3.256408261                             | 43.19838873                         | 0.006491653                                            | 15.77205692                                 |
| 4.592386764                             | 73.10776813                         | 0.003587233                                            | 24.98920638                                 |
| 3.141798936                             | 56.2708692                          | 0.008851722                                            | 19.30890721                                 |
| 6.275027195                             | 14.03549746                         | 0.004670223                                            | 18.34855355                                 |
| 3.76304732                              | 46.09664734                         | 0.009411964                                            | 8.494681213                                 |
| 3.121714389                             | 86.97103646                         | 0.004737049                                            | 15.28547661                                 |

| log.sigma.3.5.mm.3D_glrIm_LowGrayLevelRunEmphasis | log.sigma.3.5.mm.3D_glrIm_GrayLevelNonUniformityNormalized | log.sigma.3.5.mm.3D_glrIm_RunVariance | log.sigma.3.5.mm.3D_glrIm_GrayLevelNonUniformity |
|---------------------------------------------------|------------------------------------------------------------|---------------------------------------|--------------------------------------------------|
| 0.003555809                                       | 0.055522804                                                | 0.113183125                           | 108.2437609                                      |
| 0.018140814                                       | 0.099405944                                                | 0.193458197                           | 81.07509389                                      |
| 0.009015259                                       | 0.071431737                                                | 0.193225129                           | 96.4275548                                       |
| 0.008049538                                       | 0.058640651                                                | 0.11282265                            | 52.30616906                                      |
| 0.006061989                                       | 0.076902483                                                | 0.163187953                           | 161.7092428                                      |
| 0.015122322                                       | 0.069908504                                                | 0.132315529                           | 41.5071354                                       |
| 0.004119526                                       | 0.070045962                                                | 0.17215556                            | 352.4359936                                      |
| 0.002646252                                       | 0.073093445                                                | 0.174877747                           | 331.1316548                                      |
| 0.002984939                                       | 0.065566236                                                | 0.143237277                           | 267.4870531                                      |
| 0.003273264                                       | 0.069685804                                                | 0.137785093                           | 67.13555977                                      |
| 0.011097436                                       | 0.082714522                                                | 0.160648965                           | 110.3402504                                      |
| 0.004571842                                       | 0.068270965                                                | 0.142326306                           | 141.4056605                                      |
| 0.005605941                                       | 0.099302106                                                | 0.336911634                           | 153.1334807                                      |
| 0.005153026                                       | 0.069865518                                                | 0.149397009                           | 107.1251005                                      |
| 0.004753608                                       | 0.070948112                                                | 0.139583403                           | 127.6956521                                      |
| 0.004717286                                       | 0.063758556                                                | 0.15338468                            | 250.7645806                                      |
| 0.006629481                                       | 0.078077684                                                | 0.111704932                           | 84.7120187                                       |
| 0.015765893                                       | 0.093867121                                                | 0.222438568                           | 99.60953205                                      |
| 0.01457084                                        | 0.096785989                                                | 0.186618446                           | 109.4342884                                      |
| 0.005695507                                       | 0.064075788                                                | 0.141430153                           | 298.8121501                                      |
| 0.009817448                                       | 0.092734079                                                | 0.284218614                           | 236.5973063                                      |
| 0.015185017                                       | 0.083042238                                                | 0.137489846                           | 80.21458473                                      |
| 0.01380723                                        | 0.083236461                                                | 0.175799005                           | 75.11257959                                      |
| 0.006812976                                       | 0.080787857                                                | 0.165462612                           | 189.6088137                                      |
| 0.006362181                                       | 0.073550207                                                | 0.143414908                           | 84.46055847                                      |
| 0.00309406                                        | 0.063483359                                                | 0.114474497                           | 137.4182381                                      |
| 0.003473841                                       | 0.065976554                                                | 0.159368855                           | 191.8187676                                      |
| 0.004241931                                       | 0.078371022                                                | 0.161927797                           | 191.906669                                       |
| 0.020001706                                       | 0.095090057                                                | 0.147175561                           | 37.8795834                                       |
| 0.005657487                                       | 0.095037123                                                | 0.1966896025                          | 169.2464365                                      |
| 0.002984184                                       | 0.072314149                                                | 0.187063204                           | 303.2658055                                      |
| 0.00543273                                        | 0.106846919                                                | 0.232626327                           | 188.7866915                                      |
| 0.004438549                                       | 0.058959788                                                | 0.132277835                           | 172.5760584                                      |
| 0.005635215                                       | 0.065063673                                                | 0.174511932                           | 136.8302353                                      |
| 0.00504051                                        | 0.069145476                                                | 0.134410701                           | 274.8077099                                      |
| 0.003807752                                       | 0.079413455                                                | 0.206527694                           | 208.15082                                        |
| 0.002154119                                       | 0.091717714                                                | 0.243743056                           | 291.8318284                                      |
| 0.002299012                                       | 0.062235491                                                | 0.314128114                           | 274.1831854                                      |
| 0.013706083                                       | 0.121920238                                                | 0.2047274                             | 128.7927625                                      |
| 0.006734988                                       | 0.05651241                                                 | 0.119787379                           | 373.5836557                                      |
| 0.005315465                                       | 0.085480632                                                | 0.197877661                           | 193.9059609                                      |
| 0.004256048                                       | 0.056994106                                                | 0.092020004                           | 203.8898706                                      |
| 0.003828774                                       | 0.064044734                                                | 0.124770096                           | 212.7079967                                      |
| 0.004110483                                       | 0.073324132                                                | 0.133753351                           | 164.271414                                       |
| 0.011223073                                       | 0.079386191                                                | 0.153934171                           | 89.87940463                                      |
| 0.004874407                                       | 0.067003017                                                | 0.14266781                            | 165.1654181                                      |
| 0.003739863                                       | 0.07531982                                                 | 0.168137664                           | 304.9964278                                      |
| 0.026437116                                       | 0.099305874                                                | 0.214534508                           | 73.80503261                                      |
| 0.010385203                                       | 0.070350003                                                | 0.127325275                           | 54.32935203                                      |
| 0.017529193                                       | 0.084002081                                                | 0.223862919                           | 97.854518                                        |
| 0.006422267                                       | 0.064672059                                                | 0.125535088                           | 151.0595555                                      |
| 0.004931982                                       | 0.060549435                                                | 0.102492431                           | 187.3762057                                      |
| 0.006071278                                       | 0.078854738                                                | 0.15011148                            | 316.78505                                        |
| 0.018404774                                       | 0.072705965                                                | 0.139264367                           | 72.61842441                                      |
| 0.0116488                                         | 0.066998573                                                | 0.138011647                           | 80.38563733                                      |
| 0.003003172                                       | 0.083156317                                                | 0.16029213                            | 143.8095609                                      |
| 0.006595095                                       | 0.062702333                                                | 0.12479356                            | 230.6122322                                      |
| 0.006642253                                       | 0.077373535                                                | 0.179418052                           | 235.6417015                                      |
| 0.008272639                                       | 0.085869346                                                | 0.153308966                           | 126.4288916                                      |
| 0.002731469                                       | 0.067293076                                                | 0.213382065                           | 538.4488884                                      |
| 0.007041924                                       | 0.084929829                                                | 0.216848035                           | 129.8143929                                      |
| 0.004326015                                       | 0.071681707                                                | 0.152469011                           | 170.9130226                                      |
| 0.002909684                                       | 0.068082318                                                | 0.139592502                           | 354.8739937                                      |
| 0.002811724                                       | 0.070757961                                                | 0.160152131                           | 478.4172206                                      |
| 0.010545064                                       | 0.080219892                                                | 0.149981938                           | 56.44723223                                      |
| 0.002973321                                       | 0.082484734                                                | 0.229312342                           | 74.8691998                                       |
| 0.00858635                                        | 0.117577371                                                | 0.299761434                           | 127.0936147                                      |
| 0.002735914                                       | 0.070834082                                                | 0.153832627                           | 394.5334558                                      |
| 0.002898154                                       | 0.070524965                                                | 0.149860427                           | 370.3952954                                      |
| 0.006839371                                       | 0.091274358                                                | 0.206186072                           | 228.7371505                                      |
| 0.006399361                                       | 0.077673471                                                | 0.153778346                           | 89.92319963                                      |
| 0.003408461                                       | 0.06918202                                                 | 0.18016806                            | 261.716703                                       |
| 0.00401754                                        | 0.076425515                                                | 0.168846885                           | 154.8339172                                      |
| 0.006333107                                       | 0.060476436                                                | 0.110380347                           | 125.2403559                                      |
| 0.006762145                                       | 0.059952427                                                | 0.110511525                           | 171.1557673                                      |
| 0.008128327                                       | 0.08804677                                                 | 0.160124235                           | 104.5556763                                      |
| 0.008859086                                       | 0.092727164                                                | 0.198399315                           | 192.5489768                                      |
| 0.012538573                                       | 0.084022093                                                | 0.208193095                           | 69.67287851                                      |
| 0.008860945                                       | 0.084394815                                                | 0.157360338                           | 127.3461379                                      |
| 0.004151146                                       | 0.061208265                                                | 0.10583698                            | 131.3754498                                      |
| 0.004315519                                       | 0.055979741                                                | 0.114084999                           | 102.2795675                                      |
| 0.009456855                                       | 0.084956969                                                | 0.172237842                           | 134.1423401                                      |
| 0.003702019                                       | 0.072415403                                                | 0.186247874                           | 210.3677044                                      |
| 0.007244225                                       | 0.086920863                                                | 0.169425641                           | 234.0369517                                      |
| 0.004882368                                       | 0.060399833                                                | 0.128698101                           | 133.6993176                                      |
| 0.007785899                                       | 0.103022334                                                | 0.281522616                           | 131.5464208                                      |
| 0.006362906                                       | 0.066122857                                                | 0.151455341                           | 141.3043251                                      |
| 0.00563517                                        | 0.070044702                                                | 0.177413441                           | 170.0649091                                      |
| 0.009451634                                       | 0.081124199                                                | 0.168695221                           | 105.0805057                                      |
| 0.005933477                                       | 0.080626309                                                | 0.195174952                           | 142.5213569                                      |
| 0.022698602                                       | 0.103765644                                                | 0.297140338                           | 111.623104                                       |
| 0.009891928                                       | 0.062178942                                                | 0.118958022                           | 134.9335575                                      |
| 0.003155238                                       | 0.072730108                                                | 0.139675611                           | 337.9443372                                      |
| 0.004087652                                       | 0.076498223                                                | 0.166779792                           | 224.180686                                       |
| 0.006899669                                       | 0.073691685                                                | 0.126421491                           | 289.6840143                                      |
| 0.00385196                                        | 0.066262299                                                | 0.194917492                           | 199.2411576                                      |
| 0.009469006                                       | 0.066847557                                                | 0.149119136                           | 168.2229042                                      |
| 0.004969721                                       | 0.09255893                                                 | 0.227016941                           | 82.77869366                                      |
| 0.010204607                                       | 0.10364587                                                 | 0.195641615                           | 74.43295918                                      |
| 0.005153584                                       | 0.076898964                                                | 0.19575723                            | 390.9183873                                      |

| log.sigma.3.5.mm.3D_glrIm_LongRunEmphasis | log.sigma.3.5.mm.3D_glrIm_ShortRunHighGrayLevelEmphasis | log.sigma.3.5.mm.3D_glrIm_RunLengthNonUniformity | log.sigma.3.5.mm.3D_glrIm_ShortRunEmphasis |
|-------------------------------------------|---------------------------------------------------------|--------------------------------------------------|--------------------------------------------|
| 1.301577217                               | 543.6348719                                             | 1671.073399                                      | 0.940488583                                |
| 1.520170495                               | 96.69224903                                             | 636.4122435                                      | 0.9029488                                  |
| 1.496972222                               | 181.5392927                                             | 1081.263912                                      | 0.912354074                                |
| 1.315923002                               | 301.060231                                              | 753.5596207                                      | 0.934697913                                |
| 1.436894364                               | 244.7283515                                             | 1696.504833                                      | 0.916655507                                |
| 1.372489777                               | 152.7727993                                             | 487.5864292                                      | 0.923842452                                |
| 1.441137875                               | 315.6394081                                             | 4105.980473                                      | 0.920602798                                |
| 1.45145427                                | 471.2385474                                             | 3662.965872                                      | 0.917640956                                |
| 1.39024994                                | 431.9031189                                             | 3353.237557                                      | 0.923668453                                |
| 1.381198627                               | 531.6184782                                             | 792.1862391                                      | 0.924010127                                |
| 1.444697706                               | 144.7713924                                             | 1065.133902                                      | 0.912505367                                |
| 1.386865119                               | 337.494425                                              | 1705.90586                                       | 0.924562802                                |
| 1.825729582                               | 259.5603773                                             | 1115.795224                                      | 0.873182998                                |
| 1.409830677                               | 441.3362836                                             | 1245.98901                                       | 0.919600023                                |
| 1.362483566                               | 366.449444                                              | 1515.763962                                      | 0.932700664                                |
| 1.401775583                               | 311.8924437                                             | 3261.309201                                      | 0.926044023                                |
| 1.325951674                               | 276.8095306                                             | 904.4548627                                      | 0.929793552                                |
| 1.583201831                               | 108.0932475                                             | 811.265957                                       | 0.895490376                                |
| 1.512723972                               | 101.0259263                                             | 879.1734569                                      | 0.901899746                                |
| 1.387877466                               | 267.3382483                                             | 3821.83208                                       | 0.92315169                                 |
| 1.704283784                               | 150.2638554                                             | 1911.364735                                      | 0.886736054                                |
| 1.390081521                               | 115.2681221                                             | 786.9879644                                      | 0.920422953                                |
| 1.472238065                               | 136.6744858                                             | 718.7956513                                      | 0.911404453                                |
| 1.445719097                               | 207.6384482                                             | 1888.893466                                      | 0.915228327                                |
| 1.381090997                               | 325.1866931                                             | 956.1981441                                      | 0.927974719                                |
| 1.316652784                               | 529.6420513                                             | 1833.034669                                      | 0.93550254                                 |
| 1.402870565                               | 462.2281082                                             | 2409.391233                                      | 0.926975608                                |
| 1.440580641                               | 314.2563181                                             | 1966.804519                                      | 0.91480225                                 |
| 1.415185129                               | 95.36006128                                             | 322.1837578                                      | 0.916869494                                |
| 1.539029871                               | 230.2301589                                             | 1373.190948                                      | 0.898310607                                |
| 1.480650877                               | 421.1674526                                             | 3367.669108                                      | 0.914461537                                |
| 1.619503463                               | 318.2459939                                             | 1335.290364                                      | 0.889981538                                |
| 1.353610727                               | 379.8668793                                             | 2451.145199                                      | 0.931066921                                |
| 1.42886229                                | 370.1447895                                             | 1741.133852                                      | 0.926237537                                |
| 1.36607199                                | 305.6091367                                             | 3296.728612                                      | 0.927629206                                |
| 1.524160681                               | 380.9444229                                             | 2076.649242                                      | 0.908901463                                |
| 1.631463037                               | 583.305539                                              | 2416.351278                                      | 0.891731364                                |
| 1.698028672                               | 564.2559257                                             | 3412.868604                                      | 0.900289226                                |
| 1.571111166                               | 103.8033269                                             | 800.2989345                                      | 0.891201445                                |
| 1.332794356                               | 256.0903794                                             | 5543.510544                                      | 0.931860082                                |
| 1.517469983                               | 338.2031074                                             | 1786.727998                                      | 0.906918602                                |
| 1.262236792                               | 351.5024095                                             | 3089.98673                                       | 0.943689025                                |
| 1.341937977                               | 365.170554                                              | 2796.385665                                      | 0.932383229                                |
| 1.372234976                               | 343.127875                                              | 1846.028637                                      | 0.924892063                                |
| 1.436668904                               | 146.4234215                                             | 902.7764423                                      | 0.912077003                                |
| 1.38691148                                | 339.0099592                                             | 2026.625267                                      | 0.92420936                                 |
| 1.443699004                               | 348.0553468                                             | 3275.629309                                      | 0.917461948                                |
| 1.600026199                               | 73.75160458                                             | 557.593987                                       | 0.886896171                                |
| 1.348077131                               | 187.3579484                                             | 646.9387953                                      | 0.930861539                                |
| 1.586135165                               | 108.6830255                                             | 897.3968028                                      | 0.896987959                                |
| 1.338845092                               | 316.0235795                                             | 1966.471746                                      | 0.933325806                                |
| 1.291601863                               | 309.3930329                                             | 2638.020289                                      | 0.938369012                                |
| 1.416123994                               | 224.9786989                                             | 3246.536524                                      | 0.917461312                                |
| 1.369559321                               | 130.9078761                                             | 837.1348452                                      | 0.930227156                                |
| 1.372084693                               | 167.1475489                                             | 996.5923275                                      | 0.927715779                                |
| 1.43814954                                | 467.4689882                                             | 1388.509554                                      | 0.914853659                                |
| 1.33924799                                | 288.4080337                                             | 3090.425344                                      | 0.93243108                                 |
| 1.476400926                               | 339.8667414                                             | 2425.778764                                      | 0.911320536                                |
| 1.413093009                               | 229.0100637                                             | 1198.744424                                      | 0.920342363                                |
| 1.523187725                               | 445.2502171                                             | 6385.421456                                      | 0.911825279                                |
| 1.562496851                               | 203.8567971                                             | 1184.003578                                      | 0.90065522                                 |
| 1.412040274                               | 317.3506536                                             | 1943.952805                                      | 0.920695795                                |
| 1.376085253                               | 486.1953888                                             | 4310.12716                                       | 0.926654966                                |
| 1.436988208                               | 433.5413259                                             | 5440.18961                                       | 0.915425106                                |
| 1.425312726                               | 148.2872794                                             | 570.4363047                                      | 0.915760956                                |
| 1.582540806                               | 457.8089539                                             | 2575.086139                                      | 0.899863792                                |
| 1.775382455                               | 199.7002261                                             | 777.5198712                                      | 0.870758158                                |
| 1.418337463                               | 486.5497496                                             | 4519.261199                                      | 0.918860937                                |
| 1.399487127                               | 441.7572152                                             | 4318.406664                                      | 0.9238108                                  |
| 1.551838652                               | 197.4375058                                             | 1929.370995                                      | 0.898204439                                |
| 1.422648113                               | 312.6693745                                             | 940.1279196                                      | 0.918240872                                |
| 1.472600606                               | 409.0290604                                             | 3021.767634                                      | 0.912903855                                |
| 1.44284032                                | 449.190135                                              | 1639.72083                                       | 0.917548329                                |
| 1.303479706                               | 317.3342843                                             | 1762.552463                                      | 0.937812017                                |
| 1.315666341                               | 251.784934                                              | 2400.200394                                      | 0.933214157                                |
| 1.448088788                               | 265.2190284                                             | 948.784769                                       | 0.91205554                                 |
| 1.540388015                               | 156.7302313                                             | 1605.604093                                      | 0.899330265                                |
| 1.555192809                               | 156.7902138                                             | 642.6152393                                      | 0.899975043                                |
| 1.442637385                               | 176.8378512                                             | 1199.940702                                      | 0.911296541                                |
| 1.296434469                               | 467.5582324                                             | 1829.379036                                      | 0.938378556                                |
| 1.303109487                               | 500.3114117                                             | 1566.087415                                      | 0.940428464                                |
| 1.476793813                               | 210.2096725                                             | 1244.592658                                      | 0.907438967                                |
| 1.467735839                               | 378.4557881                                             | 2368.959243                                      | 0.919223363                                |
| 1.478408989                               | 212.0286879                                             | 2108.425235                                      | 0.904886142                                |
| 1.35039125                                | 332.5110025                                             | 1860.005683                                      | 0.931538135                                |
| 1.735946715                               | 162.8076288                                             | 926.2817743                                      | 0.874806964                                |
| 1.405316504                               | 339.4425649                                             | 1753.760018                                      | 0.922871525                                |
| 1.457241392                               | 275.7206682                                             | 1963.635836                                      | 0.917572154                                |
| 1.457374659                               | 187.3635618                                             | 1041.407466                                      | 0.914174735                                |
| 1.520628016                               | 287.1058826                                             | 1385.330033                                      | 0.904537546                                |
| 1.777410366                               | 81.1035656                                              | 769.2570948                                      | 0.869267827                                |
| 1.327961912                               | 215.6769954                                             | 1827.042425                                      | 0.933374355                                |
| 1.388147186                               | 438.3281605                                             | 3797.100296                                      | 0.921893541                                |
| 1.440494772                               | 343.0730131                                             | 2369.846703                                      | 0.917559504                                |
| 1.355864835                               | 227.6454684                                             | 3253.805298                                      | 0.926817613                                |
| 1.497169625                               | 445.2393494                                             | 2396.690738                                      | 0.911866475                                |
| 1.407878314                               | 191.9561418                                             | 2048.705146                                      | 0.920059703                                |
| 1.609964356                               | 367.6755718                                             | 674.6097557                                      | 0.889887988                                |
| 1.560080766                               | 141.4507903                                             | 545.2475412                                      | 0.891060448                                |
| 1.49618938                                | 251.7230618                                             | 4058.840129                                      | 0.912788073                                |

| log.sigma.3.5.mm.3D_glrIm_LongRunHighGrayLevelEmphasis | log.sigma.3.5.mm.3D_glrIm_RunPercentage | log.sigma.3.5.mm.3D_glrIm_LongRunLowGrayLevelEmphasis | log.sigma.3.5.mm.3D_glrIm_RunEntropy |
|--------------------------------------------------------|-----------------------------------------|-------------------------------------------------------|--------------------------------------|
| 763.3869337                                            | 0.918400638                             | 0.004175456                                           | 4.887996819                          |
| 154.1967538                                            | 0.871657754                             | 0.025788972                                           | 4.234935777                          |
| 285.8224981                                            | 0.879650988                             | 0.012746503                                           | 4.580792586                          |
| 425.6171554                                            | 0.912920243                             | 0.009536248                                           | 4.75876032                           |
| 382.2935675                                            | 0.887798857                             | 0.008084776                                           | 4.531320184                          |
| 211.7206755                                            | 0.899300699                             | 0.019801898                                           | 4.571994063                          |
| 476.7633922                                            | 0.890026272                             | 0.005793077                                           | 4.641135766                          |
| 726.2806548                                            | 0.886512861                             | 0.003686858                                           | 4.659329025                          |
| 647.0966892                                            | 0.897356933                             | 0.003967626                                           | 4.685598057                          |
| 786.3530295                                            | 0.898464409                             | 0.004061843                                           | 4.561031541                          |
| 227.2793212                                            | 0.884462355                             | 0.015091514                                           | 4.364749855                          |
| 499.5725701                                            | 0.898147839                             | 0.005866488                                           | 4.647592192                          |
| 511.4396825                                            | 0.82415228                              | 0.009034528                                           | 4.558577179                          |
| 665.0774979                                            | 0.892477936                             | 0.006356692                                           | 4.723779981                          |
| 542.6545546                                            | 0.906792804                             | 0.005902597                                           | 4.642851192                          |
| 459.8233942                                            | 0.898203488                             | 0.00633765                                            | 4.713028303                          |
| 403.0606671                                            | 0.908645793                             | 0.008019388                                           | 4.418533175                          |
| 180.7415938                                            | 0.859941356                             | 0.023041824                                           | 4.380865394                          |
| 161.9788227                                            | 0.870807159                             | 0.021367234                                           | 4.186073119                          |
| 389.4914049                                            | 0.896844068                             | 0.007631741                                           | 4.737953791                          |
| 271.4989707                                            | 0.842846968                             | 0.01561333                                            | 4.446190607                          |
| 171.2668922                                            | 0.89520211                              | 0.020388726                                           | 4.285555813                          |
| 211.5915942                                            | 0.880558894                             | 0.019317785                                           | 4.438214011                          |
| 319.4638983                                            | 0.886286362                             | 0.00934822                                            | 4.451979372                          |
| 472.802557                                             | 0.901746329                             | 0.007833578                                           | 4.537514637                          |
| 741.7003239                                            | 0.91359548                              | 0.003756125                                           | 4.757927379                          |
| 691.6218921                                            | 0.898689                                | 0.0045065                                             | 4.795375956                          |
| 489.6240134                                            | 0.886314265                             | 0.005744111                                           | 4.538898396                          |
| 137.712032                                             | 0.890724488                             | 0.02763203                                            | 4.115348229                          |
| 394.0914873                                            | 0.866526852                             | 0.008003029                                           | 4.345777789                          |
| 671.0952777                                            | 0.881139457                             | 0.004202137                                           | 4.654181495                          |
| 591.7757892                                            | 0.853106294                             | 0.007344503                                           | 4.326124458                          |
| 558.3454593                                            | 0.906520237                             | 0.005615847                                           | 4.828384667                          |
| 566.3260677                                            | 0.894631751                             | 0.007122636                                           | 4.732938982                          |
| 444.2907937                                            | 0.90236149                              | 0.006635496                                           | 4.578262593                          |
| 619.3593549                                            | 0.873573242                             | 0.00540991                                            | 4.527228792                          |
| 1058.765601                                            | 0.853430633                             | 0.003195223                                           | 4.584793176                          |
| 1000.263265                                            | 0.852682098                             | 0.003702895                                           | 4.958048714                          |
| 188.5027374                                            | 0.858786742                             | 0.019377384                                           | 3.918930656                          |
| 361.5661999                                            | 0.909290022                             | 0.008752982                                           | 4.83041222                           |
| 577.9883593                                            | 0.873524702                             | 0.007046842                                           | 4.569814061                          |
| 466.7172403                                            | 0.925125818                             | 0.005251596                                           | 4.798783914                          |
| 522.3722891                                            | 0.909031565                             | 0.004926137                                           | 4.659691876                          |
| 518.147348                                             | 0.900228791                             | 0.005238338                                           | 4.581112095                          |
| 221.8657093                                            | 0.885337667                             | 0.01538235                                            | 4.47555031                           |
| 500.202677                                             | 0.897828219                             | 0.006312013                                           | 4.685539295                          |
| 533.3053312                                            | 0.88724581                              | 0.005150322                                           | 4.593029915                          |
| 123.3065698                                            | 0.853130796                             | 0.039012086                                           | 4.235527902                          |
| 267.4277298                                            | 0.907168038                             | 0.013163295                                           | 4.514734703                          |
| 171.5635752                                            | 0.861060537                             | 0.026669615                                           | 4.453779075                          |
| 452.2789332                                            | 0.909123574                             | 0.007865845                                           | 4.6641256                            |
| 425.8336043                                            | 0.918033909                             | 0.006117512                                           | 4.719368963                          |
| 344.9971234                                            | 0.890190262                             | 0.008166228                                           | 4.50041941                           |
| 184.5917958                                            | 0.904264214                             | 0.023445759                                           | 4.445823191                          |
| 239.3320327                                            | 0.902082128                             | 0.015352681                                           | 4.546845798                          |
| 733.181205                                             | 0.886390533                             | 0.003925897                                           | 4.47573683                           |
| 414.1825618                                            | 0.909099553                             | 0.008134927                                           | 4.693323345                          |
| 553.7914344                                            | 0.880344352                             | 0.008767063                                           | 4.636434674                          |
| 352.3958931                                            | 0.8929705                               | 0.010292088                                           | 4.380234373                          |
| 726.6911271                                            | 0.876193365                             | 0.004011083                                           | 4.755029902                          |
| 334.2280933                                            | 0.864578796                             | 0.010322844                                           | 4.5513699                            |
| 480.1625284                                            | 0.892768655                             | 0.005772771                                           | 4.573890822                          |
| 711.3773312                                            | 0.90026177                              | 0.00382351                                            | 4.658814944                          |
| 661.1386847                                            | 0.886870705                             | 0.00394347                                            | 4.693204473                          |
| 226.8039748                                            | 0.890262902                             | 0.01421491                                            | 4.347862499                          |
| 777.8276163                                            | 0.861988607                             | 0.004362415                                           | 4.629196675                          |
| 408.9670091                                            | 0.827866918                             | 0.012966208                                           | 4.224409115                          |
| 746.6849689                                            | 0.890929231                             | 0.003675638                                           | 4.734836685                          |
| 678.6726224                                            | 0.896442127                             | 0.003790158                                           | 4.641763529                          |
| 331.1538599                                            | 0.864495408                             | 0.010036543                                           | 4.337674828                          |
| 482.8773319                                            | 0.89074436                              | 0.008145015                                           | 4.516928553                          |
| 640.5883713                                            | 0.881369912                             | 0.004714732                                           | 4.735162823                          |
| 703.098066                                             | 0.888412597                             | 0.005169957                                           | 4.585082788                          |
| 451.2041744                                            | 0.916573024                             | 0.007441483                                           | 4.737322154                          |
| 348.3445509                                            | 0.911800113                             | 0.008639464                                           | 4.767871779                          |
| 433.1866236                                            | 0.884328786                             | 0.01006229                                            | 4.390578036                          |
| 260.0152154                                            | 0.866251445                             | 0.012813844                                           | 4.334584967                          |
| 253.6951633                                            | 0.864782399                             | 0.018045508                                           | 4.522156842                          |
| 275.6185501                                            | 0.88373665                              | 0.011911409                                           | 4.388073703                          |
| 661.6377107                                            | 0.917486105                             | 0.004942071                                           | 4.799507959                          |
| 702.2346195                                            | 0.918242642                             | 0.005102004                                           | 4.882803998                          |
| 340.4832951                                            | 0.877367768                             | 0.01239896                                            | 4.524503751                          |
| 590.8174533                                            | 0.887803845                             | 0.005135972                                           | 4.638035747                          |
| 351.12676                                              | 0.87599189                              | 0.009987786                                           | 4.428659246                          |
| 484.0434026                                            | 0.907559845                             | 0.006202362                                           | 4.780109413                          |
| 308.7594293                                            | 0.832446274                             | 0.012867566                                           | 4.320091061                          |
| 527.2236171                                            | 0.895468473                             | 0.007799113                                           | 4.759926124                          |
| 420.4953571                                            | 0.885288672                             | 0.00777928                                            | 4.641339928                          |
| 294.7542455                                            | 0.884457755                             | 0.012527983                                           | 4.459877552                          |
| 479.098254                                             | 0.872098765                             | 0.007877747                                           | 4.571704857                          |
| 136.3841025                                            | 0.824386503                             | 0.040842702                                           | 4.303845935                          |
| 304.4140235                                            | 0.91090228                              | 0.012177171                                           | 4.692760565                          |
| 663.4785169                                            | 0.896362368                             | 0.004106062                                           | 4.633637162                          |
| 534.3662148                                            | 0.887762238                             | 0.005454266                                           | 4.568571545                          |
| 337.3871374                                            | 0.903227517                             | 0.008816872                                           | 4.505829985                          |
| 713.7135423                                            | 0.878163917                             | 0.005261276                                           | 4.822649464                          |
| 291.7263588                                            | 0.893176047                             | 0.012521977                                           | 4.679605892                          |
| 682.7042723                                            | 0.853353905                             | 0.006607803                                           | 4.491513756                          |
| 253.711892                                             | 0.860726803                             | 0.014170665                                           | 4.172139234                          |
| 394.3467808                                            | 0.878940076                             | 0.007519625                                           | 4.531376222                          |

| log.sigma.3.5.mm.3D_glrIm_HighGrayLevelRunEmphasis | log.sigma.3.5.mm.3D_glrIm_RunLengthNonUniformityNormalized | log.sigma.3.5.mm.3D_glszm_GrayLevelVariance |
|----------------------------------------------------|------------------------------------------------------------|---------------------------------------------|
| 580.0151926                                        | 0.856476594                                                | 45.8357986                                  |
| 105.9931607                                        | 0.778031614                                                | 18.29102093                                 |
| 197.3468183                                        | 0.798093141                                                | 24.86055434                                 |
| 322.407208                                         | 0.843639133                                                | 33.64423633                                 |
| 266.9056042                                        | 0.805459369                                                | 22.29137737                                 |
| 163.0315794                                        | 0.820193326                                                | 27.1331                                     |
| 340.5420876                                        | 0.814388125                                                | 26.53581052                                 |
| 511.0678743                                        | 0.807626554                                                | 35.32384483                                 |
| 467.1842166                                        | 0.820279288                                                | 26.51079291                                 |
| 574.5308106                                        | 0.82088686                                                 | 29.36606572                                 |
| 158.5061716                                        | 0.796765308                                                | 15.95255206                                 |
| 364.1389324                                        | 0.822367027                                                | 28.98496645                                 |
| 293.5899808                                        | 0.721645593                                                | 32.33567378                                 |
| 478.5225646                                        | 0.811535392                                                | 41.88532307                                 |
| 393.9728398                                        | 0.840426142                                                | 33.37642562                                 |
| 334.8590655                                        | 0.826788096                                                | 29.59328811                                 |
| 299.0795556                                        | 0.832489657                                                | 25.18643466                                 |
| 119.3829497                                        | 0.762937912                                                | 21.1125274                                  |
| 111.0886009                                        | 0.775641655                                                | 12.04697835                                 |
| 287.7024036                                        | 0.818605828                                                | 30.60346516                                 |
| 167.5047129                                        | 0.747033113                                                | 20.93991938                                 |
| 124.8409351                                        | 0.813162327                                                | 15.16546037                                 |
| 148.7666202                                        | 0.795114308                                                | 20.10358331                                 |
| 225.8205051                                        | 0.802948939                                                | 20.61326694                                 |
| 348.8789551                                        | 0.830485748                                                | 29.74473893                                 |
| 565.5549662                                        | 0.845518391                                                | 39.94623168                                 |
| 497.8505056                                        | 0.827621066                                                | 41.0752397                                  |
| 342.8415051                                        | 0.801667109                                                | 24.98588868                                 |
| 102.6347336                                        | 0.806667901                                                | 12.51781511                                 |
| 256.1334819                                        | 0.76871498                                                 | 21.28963625                                 |
| 459.2972152                                        | 0.801564367                                                | 28.58204386                                 |
| 359.4107966                                        | 0.753241026                                                | 28.90353733                                 |
| 408.8798622                                        | 0.835935229                                                | 34.34565662                                 |
| 399.3966601                                        | 0.826606847                                                | 33.82905647                                 |
| 328.6208154                                        | 0.828367762                                                | 23.8301778                                  |
| 417.1103905                                        | 0.790490705                                                | 26.02782544                                 |
| 653.3886989                                        | 0.757022834                                                | 39.23453262                                 |
| 620.5398775                                        | 0.773689594                                                | 39.88733766                                 |
| 117.2166868                                        | 0.754847122                                                | 10.79970396                                 |
| 274.0522382                                        | 0.83731586                                                 | 31.34015907                                 |
| 374.6441924                                        | 0.786097398                                                | 32.15383544                                 |
| 371.8706193                                        | 0.863001454                                                | 34.6813354                                  |
| 391.0454265                                        | 0.839676191                                                | 26.72312538                                 |
| 372.4164331                                        | 0.822635909                                                | 28.34229574                                 |
| 159.2977865                                        | 0.795873909                                                | 21.63443288                                 |
| 365.8260074                                        | 0.82108367                                                 | 29.6107052                                  |
| 377.4538489                                        | 0.807577148                                                | 28.72818335                                 |
| 81.7743999                                         | 0.747222628                                                | 15.57545779                                 |
| 200.7171925                                        | 0.836001321                                                | 23.28050255                                 |
| 118.3251399                                        | 0.767281526                                                | 19.85785707                                 |
| 338.5187873                                        | 0.840811415                                                | 29.32061465                                 |
| 329.7272686                                        | 0.851443256                                                | 29.6148292                                  |
| 244.9195803                                        | 0.806893979                                                | 23.00616997                                 |
| 139.6697243                                        | 0.835781878                                                | 21.34234299                                 |
| 179.075807                                         | 0.829012213                                                | 21.00315582                                 |
| 510.7927797                                        | 0.801685726                                                | 27.93285346                                 |
| 309.3433432                                        | 0.838889256                                                | 28.54592225                                 |
| 373.3865264                                        | 0.794826971                                                | 34.56885411                                 |
| 249.0435534                                        | 0.812991841                                                | 24.37763512                                 |
| 487.148934                                         | 0.796322858                                                | 28.49455716                                 |
| 223.8809536                                        | 0.773415395                                                | 28.12480232                                 |
| 343.811832                                         | 0.813960359                                                | 25.26004723                                 |
| 523.3068709                                        | 0.826145104                                                | 26.90754077                                 |
| 470.459879                                         | 0.802966951                                                | 31.77030644                                 |
| 161.3905015                                        | 0.806553446                                                | 17.60033951                                 |
| 505.5361617                                        | 0.771686942                                                | 36.99038792                                 |
| 229.8183221                                        | 0.716753295                                                | 18.35979547                                 |
| 528.9053845                                        | 0.810062563                                                | 34.58188904                                 |
| 479.8553092                                        | 0.82076945                                                 | 29.37426596                                 |
| 218.54152                                          | 0.768114019                                                | 18.62545579                                 |
| 340.4108334                                        | 0.809741831                                                | 26.53023275                                 |
| 445.6131026                                        | 0.797704401                                                | 35.45768846                                 |
| 489.399348                                         | 0.807745976                                                | 34.67175601                                 |
| 340.1582176                                        | 0.850249631                                                | 33.229294                                   |
| 268.6264288                                        | 0.839863628                                                | 29.60369859                                 |
| 292.7683798                                        | 0.796716817                                                | 22.92563326                                 |
| 173.1302082                                        | 0.770984749                                                | 18.0529726                                  |
| 172.0576043                                        | 0.772816956                                                | 28.09390856                                 |
| 193.3996394                                        | 0.79392673                                                 | 19.82836455                                 |
| 500.8240958                                        | 0.851480777                                                | 40.27226568                                 |
| 533.6035676                                        | 0.856413748                                                | 45.38537986                                 |
| 231.313738                                         | 0.786729892                                                | 28.74371944                                 |
| 410.1901378                                        | 0.812746804                                                | 30.18024762                                 |
| 235.0191673                                        | 0.781334088                                                | 18.99568389                                 |
| 356.8365378                                        | 0.837865807                                                | 31.96366138                                 |
| 184.0734096                                        | 0.723754393                                                | 16.13739183                                 |
| 369.6572853                                        | 0.819050774                                                | 35.57395035                                 |
| 298.2664526                                        | 0.807706961                                                | 24.96643366                                 |
| 204.5563116                                        | 0.801429114                                                | 21.39341276                                 |
| 317.1251072                                        | 0.781612573                                                | 28.44898834                                 |
| 89.43636383                                        | 0.713516075                                                | 15.84171488                                 |
| 230.723164                                         | 0.840694223                                                | 26.25627389                                 |
| 476.0194416                                        | 0.816002274                                                | 31.26780706                                 |
| 373.4240757                                        | 0.807424958                                                | 26.67893029                                 |
| 246.2951399                                        | 0.826446552                                                | 22.37519956                                 |
| 486.2129015                                        | 0.795952424                                                | 38.39695262                                 |
| 208.3122068                                        | 0.812549398                                                | 26.42407145                                 |
| 415.9838247                                        | 0.752482891                                                | 31.77251185                                 |
| 159.692573                                         | 0.755701453                                                | 13.76021468                                 |
| 273.4064857                                        | 0.798015485                                                | 23.17101312                                 |



| log.sigma.3.5.mm.3D_glszm_SmallAreaHighGrayLevelEmphasis | log.sigma.3.5.mm.3D_glszm_GrayLevelNonUniformityNormalized | log.sigma.3.5.mm.3D_glszm_SizeZoneNonUniformityNormalized |
|----------------------------------------------------------|------------------------------------------------------------|-----------------------------------------------------------|
| 327.8476396                                              | 0.042307934                                                | 0.38666163                                                |
| 56.81836771                                              | 0.068649407                                                | 0.219086864                                               |
| 112.9121686                                              | 0.057280648                                                | 0.294596436                                               |
| 173.4986238                                              | 0.050518884                                                | 0.316577293                                               |
| 134.6877329                                              | 0.061116063                                                | 0.293834444                                               |
| 113.7291239                                              | 0.05415                                                    | 0.30375                                                   |
| 208.4993746                                              | 0.05559137                                                 | 0.303409563                                               |
| 309.8076185                                              | 0.048340544                                                | 0.316313269                                               |
| 243.6298899                                              | 0.056172632                                                | 0.300686569                                               |
| 328.6269096                                              | 0.054650156                                                | 0.333396063                                               |
| 82.00903795                                              | 0.071115324                                                | 0.306515957                                               |
| 203.5668738                                              | 0.053784429                                                | 0.332142396                                               |
| 166.4216257                                              | 0.052582848                                                | 0.281181282                                               |
| 282.1969467                                              | 0.045894514                                                | 0.335397034                                               |
| 203.0069098                                              | 0.049217668                                                | 0.331804017                                               |
| 196.4625857                                              | 0.053056211                                                | 0.306170083                                               |
| 138.6623195                                              | 0.058690599                                                | 0.282589747                                               |
| 71.61288677                                              | 0.061614692                                                | 0.299968686                                               |
| 53.03797531                                              | 0.083328622                                                | 0.242240941                                               |
| 174.9428491                                              | 0.050873338                                                | 0.292580136                                               |
| 94.65444601                                              | 0.062491023                                                | 0.27398736                                                |
| 68.7957937                                               | 0.07098949                                                 | 0.272522969                                               |
| 81.39330716                                              | 0.064158753                                                | 0.276316857                                               |
| 127.7821389                                              | 0.062055673                                                | 0.298996702                                               |
| 216.621251                                               | 0.054520893                                                | 0.349759725                                               |
| 352.1714022                                              | 0.047512142                                                | 0.363051225                                               |
| 306.4603631                                              | 0.045568673                                                | 0.347354637                                               |
| 196.9922221                                              | 0.057789659                                                | 0.328204642                                               |
| 68.59088096                                              | 0.081892704                                                | 0.278629981                                               |
| 133.2959982                                              | 0.062945053                                                | 0.261079817                                               |
| 264.4459582                                              | 0.054543849                                                | 0.326818374                                               |
| 172.9177306                                              | 0.060492622                                                | 0.304077148                                               |
| 230.7742573                                              | 0.048373361                                                | 0.32746971                                                |
| 206.8875697                                              | 0.049295585                                                | 0.33251074                                                |
| 198.4215749                                              | 0.058951682                                                | 0.319132791                                               |
| 232.1295275                                              | 0.057630189                                                | 0.312607233                                               |
| 380.4111887                                              | 0.048126276                                                | 0.343235214                                               |
| 376.8655172                                              | 0.046910312                                                | 0.335319208                                               |
| 51.90341325                                              | 0.086264083                                                | 0.226446643                                               |
| 158.1763761                                              | 0.049261012                                                | 0.288388707                                               |
| 191.5779384                                              | 0.051577597                                                | 0.327549214                                               |
| 236.3571462                                              | 0.049568982                                                | 0.334135753                                               |
| 218.497688                                               | 0.054738415                                                | 0.327745423                                               |
| 202.3805748                                              | 0.054782697                                                | 0.323192022                                               |
| 102.6943278                                              | 0.060541103                                                | 0.291467222                                               |
| 212.3607069                                              | 0.052430827                                                | 0.348783276                                               |
| 218.4916219                                              | 0.05295138                                                 | 0.287170841                                               |
| 37.94237922                                              | 0.073388823                                                | 0.197431629                                               |
| 115.6545835                                              | 0.058855146                                                | 0.281913464                                               |
| 76.64126073                                              | 0.064427235                                                | 0.29281443                                                |
| 184.1780696                                              | 0.05390785                                                 | 0.319748851                                               |
| 193.1908468                                              | 0.051636918                                                | 0.319866294                                               |
| 137.5261246                                              | 0.058451449                                                | 0.307234697                                               |
| 85.34671544                                              | 0.060396656                                                | 0.319703171                                               |
| 100.2931034                                              | 0.061236029                                                | 0.297094017                                               |
| 274.9630033                                              | 0.056783134                                                | 0.278000974                                               |
| 168.1592142                                              | 0.051950637                                                | 0.314343381                                               |
| 189.2440008                                              | 0.050080664                                                | 0.30026811                                                |
| 124.9161534                                              | 0.057900103                                                | 0.302749472                                               |
| 268.1680899                                              | 0.05365619                                                 | 0.309689834                                               |
| 141.6339117                                              | 0.05396133                                                 | 0.323092031                                               |
| 186.8033005                                              | 0.057603321                                                | 0.287690393                                               |
| 304.6346069                                              | 0.056002994                                                | 0.337225122                                               |
| 287.7531083                                              | 0.050190184                                                | 0.285277489                                               |
| 83.16337565                                              | 0.066790123                                                | 0.231975309                                               |
| 302.5596605                                              | 0.048649013                                                | 0.309033564                                               |
| 97.6750809                                               | 0.072958364                                                | 0.23926954                                                |
| 305.2038911                                              | 0.048738003                                                | 0.307176032                                               |
| 254.9735869                                              | 0.052279445                                                | 0.343849884                                               |
| 113.755539                                               | 0.065570411                                                | 0.266797162                                               |
| 164.8910971                                              | 0.060233598                                                | 0.288033395                                               |
| 268.3871464                                              | 0.049562682                                                | 0.327580175                                               |
| 243.3999353                                              | 0.051738892                                                | 0.290138357                                               |
| 176.1401129                                              | 0.048264702                                                | 0.333341023                                               |
| 171.6121986                                              | 0.052600701                                                | 0.32864704                                                |
| 121.5592864                                              | 0.06287197                                                 | 0.276255625                                               |
| 86.05094912                                              | 0.066953405                                                | 0.267975488                                               |
| 99.94478962                                              | 0.055008188                                                | 0.241805149                                               |
| 109.1275649                                              | 0.062743178                                                | 0.268043495                                               |
| 263.7664009                                              | 0.047978131                                                | 0.335586126                                               |
| 306.2975367                                              | 0.042567112                                                | 0.396947968                                               |
| 141.1826639                                              | 0.054418152                                                | 0.326993568                                               |
| 235.4852892                                              | 0.052051599                                                | 0.322962444                                               |
| 108.4585926                                              | 0.064588733                                                | 0.226888778                                               |
| 208.4844499                                              | 0.049862656                                                | 0.33164112                                                |
| 93.16931149                                              | 0.082562064                                                | 0.236793745                                               |
| 186.109684                                               | 0.048392143                                                | 0.33839779                                                |
| 190.8892901                                              | 0.056716082                                                | 0.360478861                                               |
| 98.93949597                                              | 0.061169339                                                | 0.269058497                                               |
| 153.0886653                                              | 0.054023062                                                | 0.28495799                                                |
| 66.80356077                                              | 0.073264463                                                | 0.303099174                                               |
| 129.677278                                               | 0.055012989                                                | 0.331735247                                               |
| 251.4230962                                              | 0.051546463                                                | 0.304155373                                               |
| 212.3627007                                              | 0.055370449                                                | 0.327503673                                               |
| 121.6398795                                              | 0.058728857                                                | 0.26715814                                                |
| 301.6624829                                              | 0.047700709                                                | 0.382082544                                               |
| 116.9420898                                              | 0.054160766                                                | 0.282421213                                               |
| 173.7988423                                              | 0.055097594                                                | 0.277195032                                               |
| 66.72714347                                              | 0.077562327                                                | 0.252510388                                               |
| 166.3364525                                              | 0.058933399                                                | 0.320404358                                               |

| log.sigma.3.5.mm.3D_glszm_SizeZoneNonUniformity | log.sigma.3.5.mm.3D_glszm_GrayLevelNonUniformity | log.sigma.3.5.mm.3D_glszm_LargeAreaEmphasis | log.sigma.3.5.mm.3D_glszm_ZoneVariance |
|-------------------------------------------------|--------------------------------------------------|---------------------------------------------|----------------------------------------|
| 312.0359356                                     | 34.1425031                                       | 38.63692689                                 | 31.722699                              |
| 40.09289617                                     | 12.56284153                                      | 196.6502732                                 | 170.5454328                            |
| 98.39520958                                     | 19.13173653                                      | 123.3353293                                 | 102.2413855                            |
| 101.9378882                                     | 16.26708075                                      | 43.86024845                                 | 34.6541125                             |
| 171.5993151                                     | 35.69178082                                      | 100.5308219                                 | 84.08946331                            |
| 60.75                                           | 10.83                                            | 68.58                                       | 57.69                                  |
| 440.854095                                      | 80.77426015                                      | 139.9621473                                 | 124.8363113                            |
| 374.8312236                                     | 57.2835443                                       | 384.0472574                                 | 365.4664288                            |
| 365.6348684                                     | 68.30592105                                      | 85.56085526                                 | 71.58457139                            |
| 108.6871166                                     | 17.81595092                                      | 48.16564417                                 | 37.35244081                            |
| 115.25                                          | 26.7393617                                       | 77.93617021                                 | 61.85095066                            |
| 212.9032761                                     | 34.47581903                                      | 73.38065523                                 | 60.44984314                            |
| 90.54037267                                     | 16.93167702                                      | 665.6801242                                 | 632.0617357                            |
| 156.965812                                      | 21.47863248                                      | 115.8568376                                 | 102.3967191                            |
| 201.7368421                                     | 29.92434211                                      | 72.07236842                                 | 61.42416898                            |
| 349.6462347                                     | 60.59019264                                      | 147.5201401                                 | 132.8368825                            |
| 99.47159091                                     | 20.65909091                                      | 34.34090909                                 | 22.83493673                            |
| 69.89270386                                     | 14.35622318                                      | 322.3218884                                 | 294.3182597                            |
| 64.43609023                                     | 22.16541353                                      | 249.1578947                                 | 225.34643                              |
| 406.3938085                                     | 70.66306695                                      | 103.287977                                  | 89.27807348                            |
| 129.3220339                                     | 29.49576271                                      | 980.1271186                                 | 939.080293                             |
| 67.04065041                                     | 17.46341463                                      | 77.66260163                                 | 58.42403662                            |
| 61.34234234                                     | 14.24324324                                      | 174.6216216                                 | 153.3454265                            |
| 202.719764                                      | 42.07374631                                      | 111.0722714                                 | 95.83004194                            |
| 131.8594164                                     | 20.55437666                                      | 59.13793103                                 | 47.73611297                            |
| 291.1670823                                     | 38.10473815                                      | 61.93640898                                 | 53.21108855                            |
| 327.2080679                                     | 42.92569002                                      | 155.5552017                                 | 143.7761696                            |
| 235.9791377                                     | 41.55076495                                      | 279.2100139                                 | 264.4533031                            |
| 30.92792793                                     | 9.09009009                                       | 91.55855856                                 | 75.34161188                            |
| 101.2989691                                     | 24.42268041                                      | 202.6391753                                 | 174.614704                             |
| 361.4611212                                     | 60.32549729                                      | 392.3707052                                 | 373.8635946                            |
| 116.765625                                      | 23.22916667                                      | 574.4348958                                 | 545.4041273                            |
| 323.867543                                      | 47.84125379                                      | 61.5520728                                  | 50.89240902                            |
| 231.094964                                      | 34.26043165                                      | 91.13956835                                 | 79.70641271                            |
| 392.5333333                                     | 72.51056911                                      | 73.05853659                                 | 60.23864366                            |
| 201.9442724                                     | 37.22910217                                      | 331.0665635                                 | 309.5145477                            |
| 248.1590595                                     | 34.79529737                                      | 602.1479945                                 | 575.6603862                            |
| 411.771987                                      | 57.60586319                                      | 413.9242671                                 | 396.2610021                            |
| 43.2513089                                      | 16.47643979                                      | 250.3350785                                 | 208.8641759                            |
| 626.6686608                                     | 107.0441786                                      | 50.89093419                                 | 39.69786034                            |
| 200.1325696                                     | 31.51391162                                      | 197.4369885                                 | 179.4127252                            |
| 479.8189415                                     | 71.1810585                                       | 21.48259053                                 | 14.23089662                            |
| 362.4864376                                     | 60.54068716                                      | 41.02983725                                 | 30.12073304                            |
| 230.7591036                                     | 39.11484594                                      | 78.43417367                                 | 66.29177946                            |
| 90.35483871                                     | 18.76774194                                      | 105.0774194                                 | 88.08174818                            |
| 284.9559364                                     | 42.83598531                                      | 90.68176255                                 | 79.39314955                            |
| 319.0468047                                     | 58.8289829                                       | 235.229523                                  | 218.3685573                            |
| 28.62758621                                     | 10.64137931                                      | 211.3172414                                 | 175.2344352                            |
| 68.78688525                                     | 14.36065574                                      | 46.20081967                                 | 34.03673408                            |
| 88.72277228                                     | 19.52145215                                      | 216.9768977                                 | 197.0670414                            |
| 245.8868661                                     | 41.45513654                                      | 58.7373212                                  | 47.57702994                            |
| 365.6071741                                     | 59.02099738                                      | 28.49256343                                 | 19.79445045                            |
| 337.0364631                                     | 64.12123974                                      | 237.4749316                                 | 220.5578702                            |
| 100.0670927                                     | 18.90415335                                      | 76.87539936                                 | 64.43456604                            |
| 115.8666667                                     | 23.88205128                                      | 60.11794872                                 | 48.48809993                            |
| 123.4324324                                     | 25.21171171                                      | 126.8873874                                 | 107.598673                             |
| 394.8152866                                     | 65.25                                            | 42.94824841                                 | 32.57636149                            |
| 233.9088575                                     | 39.01283697                                      | 228.8883184                                 | 209.1833808                            |
| 126.8520286                                     | 24.2601432                                       | 110.2959427                                 | 94.82608324                            |
| 702.3765432                                     | 121.6922399                                      | 188.0912698                                 | 171.88958                              |
| 127.9444444                                     | 21.36868687                                      | 343.6717172                                 | 323.783721                             |
| 192.4648729                                     | 38.53662182                                      | 147.6143498                                 | 131.6860182                            |
| 585.4228111                                     | 97.22119816                                      | 107.7897465                                 | 96.66967305                            |
| 506.9380979                                     | 89.18795723                                      | 154.3066967                                 | 135.90419                              |
| 41.75555556                                     | 12.02222222                                      | 70.62222222                                 | 51.35987654                            |
| 237.9558442                                     | 37.45974026                                      | 677.3662338                                 | 652.2101467                            |
| 44.26486486                                     | 13.4972973                                       | 734.9621622                                 | 685.2787144                            |
| 500.6969325                                     | 79.44294479                                      | 206.7128834                                 | 192.0105988                            |
| 576.6362552                                     | 87.6726297                                       | 97.66785927                                 | 85.46998022                            |
| 141.9360902                                     | 34.88345865                                      | 452.5413534                                 | 422.8675307                            |
| 88.71428571                                     | 18.55194805                                      | 150.1850649                                 | 132.3974848                            |
| 321.0285714                                     | 48.57142857                                      | 339.9979592                                 | 320.8350062                            |
| 165.6690018                                     | 29.54290718                                      | 133.9737303                                 | 118.0437062                            |
| 259.6726573                                     | 37.59820282                                      | 60.76893453                                 | 52.35967906                            |
| 318.7876289                                     | 51.02268041                                      | 59.74329897                                 | 49.32437985                            |
| 91.71686747                                     | 20.87349398                                      | 79.21686747                                 | 62.87773988                            |
| 124.6086022                                     | 31.13333333                                      | 299.6301075                                 | 273.0799121                            |
| 46.66839378                                     | 10.61658031                                      | 218.3626943                                 | 193.7240731                            |
| 105.6091371                                     | 24.72081218                                      | 133.0329949                                 | 114.2625486                            |
| 266.1197982                                     | 38.04665826                                      | 52.24337957                                 | 43.54348341                            |
| 308.4285714                                     | 33.07464607                                      | 38.55212355                                 | 31.99931426                            |
| 150.7440347                                     | 25.0867679                                       | 186.7180043                                 | 171.4893869                            |
| 251.2647815                                     | 40.49614396                                      | 239.3303342                                 | 221.6752153                            |
| 132.2761578                                     | 37.65523156                                      | 201.1509434                                 | 173.3673758                            |
| 248.3991989                                     | 37.34712951                                      | 46.75967957                                 | 36.15591773                            |
| 40.96531792                                     | 14.28323699                                      | 1017.387283                                 | 938.9675566                            |
| 245                                             | 35.0359116                                       | 118.1616022                                 | 107.3098558                            |
| 271.801061                                      | 42.76392573                                      | 181.3448276                                 | 168.1199333                            |
| 98.47540984                                     | 22.38797814                                      | 84.5464809                                  | 68.54644809                            |
| 123.1018519                                     | 23.33796296                                      | 281.4699074                                 | 259.4972512                            |
| 66.68181818                                     | 16.11818182                                      | 678.1                                       | 642.967438                             |
| 268.0420792                                     | 44.45049505                                      | 29.72524752                                 | 21.03442677                            |
| 432.2047854                                     | 73.11963406                                      | 147.6826179                                 | 134.3788622                            |
| 286.5657143                                     | 48.44914286                                      | 165.4514286                                 | 151.2277551                            |
| 305.8960699                                     | 67.24454148                                      | 144.660262                                  | 130.2136237                            |
| 356.8650964                                     | 44.55246253                                      | 240.5867238                                 | 227.1632086                            |
| 207.5795918                                     | 39.80816327                                      | 76.81496599                                 | 62.1257365                             |
| 58.48815166                                     | 11.62559242                                      | 268.9810427                                 | 244.358752                             |
| 38.38157895                                     | 11.78947368                                      | 180.1184211                                 | 150.0129848                            |
| 425.496888                                      | 78.26355422                                      | 254.8885542                                 | 235.9843931                            |

| log.sigma.3.5.mm.3D_glszm_ZonePercentage | log.sigma.3.5.mm.3D_glszm_LargeAreaLowGrayLevelEmphasis | log.sigma.3.5.mm.3D_glszm_LargeAreaHighGrayLevelEmphasis | log.sigma.3.5.mm.3D_glszm_HighGrayLevelZoneEmphasis |
|------------------------------------------|---------------------------------------------------------|----------------------------------------------------------|-----------------------------------------------------|
| 0.380301602                              | 0.074626374                                             | 22620.41016                                              | 537.9938042                                         |
| 0.195721925                              | 2.610899898                                             | 16355.01093                                              | 122.7103825                                         |
| 0.217731421                              | 0.872017585                                             | 21172.75449                                              | 206.7065868                                         |
| 0.329580348                              | 0.180618412                                             | 14237.30435                                              | 311.4565217                                         |
| 0.246621622                              | 0.444994361                                             | 24904.77226                                              | 255.5856164                                         |
| 0.303030303                              | 0.764572924                                             | 7415.625                                                 | 192.77                                              |
| 0.257122633                              | 0.554977146                                             | 37564.56091                                              | 364.3819683                                         |
| 0.231989037                              | 0.888480356                                             | 169302.1857                                              | 536.4413502                                         |
| 0.267487901                              | 0.210948005                                             | 37738.93339                                              | 449.3610197                                         |
| 0.304104478                              | 0.101366692                                             | 25503.84356                                              | 569.4294479                                         |
| 0.24933687                               | 0.599970478                                             | 12094.32447                                              | 150.537234                                          |
| 0.278091106                              | 0.247041756                                             | 24010.43838                                              | 358.0592824                                         |
| 0.172469202                              | 2.662661782                                             | 169698.9441                                              | 312.5341615                                         |
| 0.272568433                              | 0.297885978                                             | 49373.21154                                              | 473.6901709                                         |
| 0.306451613                              | 0.200821808                                             | 28290.06908                                              | 363.6233553                                         |
| 0.260968921                              | 0.585020413                                             | 39904.80035                                              | 351.1077058                                         |
| 0.29480737                               | 0.129800097                                             | 11224.40909                                              | 271.2840909                                         |
| 0.188969992                              | 3.97269741                                              | 28167.74249                                              | 132.7639485                                         |
| 0.204930663                              | 3.433834819                                             | 19787.02256                                              | 113.556391                                          |
| 0.267166763                              | 0.487452047                                             | 24136.07127                                              | 310.8826494                                         |
| 0.156084656                              | 7.62802352                                              | 130435.2352                                              | 184.2055085                                         |
| 0.227988879                              | 0.928054046                                             | 8264.784553                                              | 131.296748                                          |
| 0.216796875                              | 1.712863688                                             | 20791.11712                                              | 156.3198198                                         |
| 0.256139025                              | 0.614573685                                             | 21582.22566                                              | 232.320059                                          |
| 0.296150825                              | 0.213020572                                             | 18606.61008                                              | 359.403183                                          |
| 0.338539468                              | 0.124420477                                             | 32869.82668                                              | 570.6683292                                         |
| 0.291370244                              | 0.360732377                                             | 70479.60297                                              | 506.3428875                                         |
| 0.26031861                               | 0.95835734                                              | 83318.75661                                              | 340.4311544                                         |
| 0.248322148                              | 1.731306738                                             | 5900.198198                                              | 123.8108108                                         |
| 0.188899708                              | 0.847917617                                             | 50808.74485                                              | 254.7963918                                         |
| 0.232450609                              | 1.014062023                                             | 155996.4087                                              | 461.9068716                                         |
| 0.185596907                              | 1.577951518                                             | 213784.1771                                              | 314.0208333                                         |
| 0.306286776                              | 0.165269455                                             | 26720.13448                                              | 394.8847321                                         |
| 0.295744681                              | 0.281284224                                             | 32828.58129                                              | 372.494964                                          |
| 0.279291553                              | 0.286116739                                             | 21067.78049                                              | 338.0130081                                         |
| 0.215405135                              | 0.994673104                                             | 114414.8947                                              | 421.5820433                                         |
| 0.194302607                              | 0.979337195                                             | 374796.9129                                              | 640.264177                                          |
| 0.237938384                              | 0.806805332                                             | 217562.6539                                              | 636.3526059                                         |
| 0.155284553                              | 2.288228954                                             | 30589.82723                                              | 110.0680628                                         |
| 0.29889587                               | 0.258672962                                             | 12817.32628                                              | 284.8867925                                         |
| 0.235543562                              | 0.529273673                                             | 78680.18494                                              | 337.1734861                                         |
| 0.371347298                              | 0.074420865                                             | 7823.449861                                              | 384.5745125                                         |
| 0.302764851                              | 0.1288303                                               | 14981.62568                                              | 384.261302                                          |
| 0.286977492                              | 0.22216918                                              | 29815.2381                                               | 347.9705882                                         |
| 0.24256651                               | 0.981928344                                             | 12729.83226                                              | 181.616129                                          |
| 0.297632058                              | 0.325053804                                             | 27936.75398                                              | 363.1089351                                         |
| 0.243533538                              | 0.766076198                                             | 74379.18542                                              | 398.5373537                                         |
| 0.166475316                              | 4.771506154                                             | 11207.58621                                              | 95.46206897                                         |
| 0.286721504                              | 0.334784316                                             | 8151.967213                                              | 209.9836066                                         |
| 0.224112426                              | 3.409424232                                             | 15330.13861                                              | 142.1683168                                         |
| 0.299338264                              | 0.220844837                                             | 18480.57607                                              | 327.006502                                          |
| 0.339068526                              | 0.107679188                                             | 9233.914261                                              | 332.0034996                                         |
| 0.243129433                              | 1.182103235                                             | 49935.86509                                              | 244.9808569                                         |
| 0.283514493                              | 1.033917358                                             | 7259.661342                                              | 153.1884984                                         |
| 0.293233083                              | 0.604800326                                             | 7706.861538                                              | 184.0564103                                         |
| 0.227692308                              | 0.26256001                                              | 63546.77703                                              | 506.4977477                                         |
| 0.310506799                              | 0.176133391                                             | 12790.34395                                              | 302.2165605                                         |
| 0.225274725                              | 0.690234992                                             | 83099.07702                                              | 349.3465982                                         |
| 0.254247573                              | 0.502422982                                             | 26186.26253                                              | 236.8830549                                         |
| 0.24843904                               | 0.471151392                                             | 79199.97751                                              | 476.4290123                                         |
| 0.224235561                              | 2.055520551                                             | 59385.56313                                              | 251.2348485                                         |
| 0.250561798                              | 0.520010432                                             | 44498.14649                                              | 346.1464873                                         |
| 0.299879081                              | 0.25286832                                              | 48405.88134                                              | 522.0725806                                         |
| 0.233110324                              | 0.407499812                                             | 61243.24986                                              | 517.6291503                                         |
| 0.227848101                              | 0.619855112                                             | 9639.494444                                              | 170.6722222                                         |
| 0.19937856                               | 1.574806762                                             | 295255.0922                                              | 532.312987                                          |
| 0.141871166                              | 3.432343232                                             | 163336.6324                                              | 207.4594595                                         |
| 0.2608                                   | 0.41717411                                              | 105302.8276                                              | 534.4472393                                         |
| 0.286324057                              | 0.223041195                                             | 44858.84914                                              | 441.9946333                                         |
| 0.183574879                              | 2.674633257                                             | 80172.40226                                              | 223.8364662                                         |
| 0.237105466                              | 0.522483143                                             | 47183.31494                                              | 326                                                 |
| 0.228438228                              | 0.978616458                                             | 121818.352                                               | 464.2857143                                         |
| 0.250548486                              | 0.321694402                                             | 59482.87916                                              | 467.7635727                                         |
| 0.344842851                              | 0.182858788                                             | 22686.95635                                              | 313.4801027                                         |
| 0.309805174                              | 0.303549183                                             | 14102.28969                                              | 284.9443299                                         |
| 0.247391952                              | 0.302024233                                             | 23985.30422                                              | 251.0993976                                         |
| 0.194073456                              | 2.180025081                                             | 44237.73978                                              | 178.2795699                                         |
| 0.201461378                              | 1.936485638                                             | 27023.9171                                               | 198.8497409                                         |
| 0.230814294                              | 0.837337494                                             | 22929.79188                                              | 202.5583756                                         |
| 0.339033775                              | 0.105431691                                             | 30692.01513                                              | 461.3757881                                         |
| 0.390648567                              | 0.086191387                                             | 20626.04762                                              | 497.4813385                                         |
| 0.256253474                              | 0.890613515                                             | 42388.39046                                              | 238.1453362                                         |
| 0.23799327                               | 0.70336168                                              | 85053.51285                                              | 412.5385604                                         |
| 0.189716889                              | 0.919160734                                             | 48755.65352                                              | 225.6054889                                         |
| 0.307093071                              | 0.159661709                                             | 16492.58611                                              | 349.7930574                                         |
| 0.112924282                              | 7.240493172                                             | 151274.6936                                              | 192.1213873                                         |
| 0.303563941                              | 0.340606044                                             | 44745.54006                                              | 331.2334254                                         |
| 0.274981765                              | 0.838256284                                             | 41674.33289                                              | 311.4018568                                         |
| 0.25                                     | 0.529082845                                             | 15292.81694                                              | 199.3169399                                         |
| 0.213333333                              | 1.015309104                                             | 81343.81481                                              | 301.0046296                                         |
| 0.168711656                              | 16.25531053                                             | 31024.06364                                              | 118.4954545                                         |
| 0.339210747                              | 0.194737241                                             | 6393.97896                                               | 228.1212871                                         |
| 0.274165541                              | 0.330592705                                             | 68754.05489                                              | 456.8289937                                         |
| 0.265151515                              | 0.503062895                                             | 56338.32457                                              | 367.8937143                                         |
| 0.263097426                              | 0.599980293                                             | 37496.05328                                              | 235.1528384                                         |
| 0.272939801                              | 0.623437134                                             | 97432.23876                                              | 482.5503212                                         |
| 0.260915868                              | 0.489688681                                             | 15187.39592                                              | 214.3564626                                         |
| 0.201528176                              | 0.649964974                                             | 116802.8436                                              | 355.7725118                                         |
| 0.182254197                              | 1.142015569                                             | 30849.93421                                              | 142.1052632                                         |
| 0.22996536                               | 1.291462685                                             | 52917.24623                                              | 293.8825301                                         |

| log.sigma.3.5.mm.3D_glszm_SmallAreaEmphasis | log.sigma.3.5.mm.3D_glszm_LowGrayLevelZoneEmphasis | log.sigma.3.5.mm.3D_glszm_ZoneEntropy | log.sigma.3.5.mm.3D_glszm_SmallAreaLowGrayLevelEmphasis |
|---------------------------------------------|----------------------------------------------------|---------------------------------------|---------------------------------------------------------|
| 0.645113151                                 | 0.005309564                                        | 6.571628724                           | 0.004206976                                             |
| 0.455507965                                 | 0.025156553                                        | 6.179683825                           | 0.010803176                                             |
| 0.556873228                                 | 0.013720173                                        | 6.321392154                           | 0.009267153                                             |
| 0.57876486                                  | 0.013759186                                        | 6.337995704                           | 0.011323203                                             |
| 0.560510356                                 | 0.009197104                                        | 6.441865747                           | 0.006625946                                             |
| 0.565476857                                 | 0.017584824                                        | 6.092601814                           | 0.008742438                                             |
| 0.5700617                                   | 0.005065114                                        | 6.774666057                           | 0.003305023                                             |
| 0.580108141                                 | 0.003674483                                        | 6.79825566                            | 0.002600038                                             |
| 0.564474109                                 | 0.004031844                                        | 6.684159472                           | 0.00271155                                              |
| 0.59877172                                  | 0.00569413                                         | 6.23793234                            | 0.00483582                                              |
| 0.572407329                                 | 0.015060554                                        | 6.082713849                           | 0.009526966                                             |
| 0.597433714                                 | 0.007225234                                        | 6.490299401                           | 0.005658727                                             |
| 0.541724213                                 | 0.010134114                                        | 6.405136548                           | 0.007188281                                             |
| 0.600093371                                 | 0.008707706                                        | 6.548241757                           | 0.005676919                                             |
| 0.593313423                                 | 0.006527388                                        | 6.466223694                           | 0.003587663                                             |
| 0.569771549                                 | 0.006236292                                        | 6.708359363                           | 0.004218151                                             |
| 0.547300443                                 | 0.010787949                                        | 6.418179502                           | 0.007852222                                             |
| 0.566817633                                 | 0.024486686                                        | 6.059123893                           | 0.016370724                                             |
| 0.500410147                                 | 0.020079571                                        | 6.050800124                           | 0.012943483                                             |
| 0.555718357                                 | 0.007139002                                        | 6.856203891                           | 0.004459499                                             |
| 0.53925665                                  | 0.014932843                                        | 6.386393304                           | 0.00845317                                              |
| 0.537883687                                 | 0.020801716                                        | 6.10847521                            | 0.013494322                                             |
| 0.540806168                                 | 0.017720433                                        | 6.095944832                           | 0.011358885                                             |
| 0.564720447                                 | 0.009388449                                        | 6.469388173                           | 0.006371854                                             |
| 0.61310068                                  | 0.011188707                                        | 6.235590816                           | 0.009168031                                             |
| 0.625191883                                 | 0.0045709                                          | 6.577440974                           | 0.003517007                                             |
| 0.608329559                                 | 0.004868313                                        | 6.661301307                           | 0.003385114                                             |
| 0.593128455                                 | 0.006036247                                        | 6.4188415                             | 0.004357151                                             |
| 0.536385825                                 | 0.022641015                                        | 5.407312124                           | 0.009245134                                             |
| 0.521301219                                 | 0.009619919                                        | 6.503620561                           | 0.006891906                                             |
| 0.591628089                                 | 0.004183908                                        | 6.605238968                           | 0.003017285                                             |
| 0.566250072                                 | 0.01123763                                         | 6.29626407                            | 0.006977662                                             |
| 0.590755054                                 | 0.005779938                                        | 6.683359223                           | 0.003411899                                             |
| 0.596287585                                 | 0.008654222                                        | 6.572579325                           | 0.005573035                                             |
| 0.584448714                                 | 0.005849528                                        | 6.555336839                           | 0.00300719                                              |
| 0.578384022                                 | 0.00538379                                         | 6.478903644                           | 0.002793781                                             |
| 0.607464236                                 | 0.003683923                                        | 6.630152606                           | 0.002872158                                             |
| 0.598944881                                 | 0.003136285                                        | 6.769802836                           | 0.002227884                                             |
| 0.474775768                                 | 0.022479521                                        | 0.016656677                           | 0.010058104                                             |
| 0.552321428                                 | 0.007622538                                        | 6.940145943                           | 0.00444836                                              |
| 0.589169742                                 | 0.008066286                                        | 6.478217816                           | 0.004313229                                             |
| 0.598186897                                 | 0.004863164                                        | 6.707303756                           | 0.003183061                                             |
| 0.594034843                                 | 0.005014774                                        | 6.621762526                           | 0.003488833                                             |
| 0.587867639                                 | 0.005971582                                        | 6.508336314                           | 0.004284074                                             |
| 0.557772175                                 | 0.014937351                                        | 6.213838336                           | 0.010069811                                             |
| 0.611943381                                 | 0.006569865                                        | 6.436626682                           | 0.004453091                                             |
| 0.547367571                                 | 0.005212949                                        | 6.749206919                           | 0.003647983                                             |
| 0.440121042                                 | 0.039661121                                        | 5.990629973                           | 0.016388108                                             |
| 0.53811302                                  | 0.014076642                                        | 6.148554758                           | 0.009057381                                             |
| 0.558699296                                 | 0.023249586                                        | 6.213213218                           | 0.014122458                                             |
| 0.583954023                                 | 0.009563762                                        | 6.559384704                           | 0.006015723                                             |
| 0.584078475                                 | 0.006055254                                        | 6.670583601                           | 0.003927392                                             |
| 0.572716899                                 | 0.008376735                                        | 6.583066314                           | 0.00568004                                              |
| 0.58353914                                  | 0.025446917                                        | 6.107473069                           | 0.01646976                                              |
| 0.560230545                                 | 0.014627408                                        | 6.211318858                           | 0.007933227                                             |
| 0.543235302                                 | 0.005462863                                        | 6.553535663                           | 0.004351853                                             |
| 0.578683453                                 | 0.009732552                                        | 6.700761285                           | 0.006731821                                             |
| 0.566311092                                 | 0.009942018                                        | 6.745556092                           | 0.004768207                                             |
| 0.566554451                                 | 0.015684923                                        | 6.35817768                            | 0.012225737                                             |
| 0.57443933                                  | 0.003548938                                        | 6.821133376                           | 0.002360257                                             |
| 0.588299987                                 | 0.010287077                                        | 6.334993173                           | 0.007656988                                             |
| 0.551676187                                 | 0.006330626                                        | 6.564689825                           | 0.004569668                                             |
| 0.601327909                                 | 0.003502017                                        | 6.566920212                           | 0.001933471                                             |
| 0.549087095                                 | 0.003442493                                        | 6.984003013                           | 0.002223015                                             |
| 0.489391438                                 | 0.015637199                                        | 6.112531258                           | 0.010653385                                             |
| 0.574657598                                 | 0.004706424                                        | 6.768637624                           | 0.003303113                                             |
| 0.492019431                                 | 0.015403518                                        | 5.995374819                           | 0.006422054                                             |
| 0.571964733                                 | 0.00339263                                         | 6.885889439                           | 0.018426                                                |
| 0.607941348                                 | 0.004092032                                        | 6.642462662                           | 0.002984089                                             |
| 0.527839872                                 | 0.009882018                                        | 6.45916182                            | 0.005490989                                             |
| 0.550073236                                 | 0.009667337                                        | 6.224725955                           | 0.004343439                                             |
| 0.5934243                                   | 0.005186709                                        | 6.745933079                           | 0.003737296                                             |
| 0.552800031                                 | 0.006499123                                        | 6.651988974                           | 0.003823548                                             |
| 0.596808442                                 | 0.009958613                                        | 6.524215372                           | 0.007712906                                             |
| 0.593314717                                 | 0.008022693                                        | 6.60663506                            | 0.005020296                                             |
| 0.537965387                                 | 0.0150668                                          | 6.305909854                           | 0.009685168                                             |
| 0.528547485                                 | 0.013891252                                        | 6.377851877                           | 0.009790249                                             |
| 0.498413249                                 | 0.017436655                                        | 6.297956248                           | 0.00816879                                              |
| 0.532949661                                 | 0.012275678                                        | 6.442892015                           | 0.006380842                                             |
| 0.598172358                                 | 0.006201922                                        | 6.616509548                           | 0.004632391                                             |
| 0.653833159                                 | 0.00617103                                         | 6.500180997                           | 0.004818819                                             |
| 0.588863142                                 | 0.013587702                                        | 6.330412251                           | 0.007925126                                             |
| 0.586262987                                 | 0.005322436                                        | 6.57033378                            | 0.003614494                                             |
| 0.485707838                                 | 0.010052181                                        | 6.721622828                           | 0.004612638                                             |
| 0.596071604                                 | 0.006321959                                        | 6.569700303                           | 0.00417848                                              |
| 0.500470101                                 | 0.013947972                                        | 5.970671151                           | 0.009995489                                             |
| 0.601120622                                 | 0.010622821                                        | 6.536220565                           | 0.008111958                                             |
| 0.623235997                                 | 0.007017203                                        | 6.363041669                           | 0.004134185                                             |
| 0.532896015                                 | 0.014139736                                        | 6.352648311                           | 0.008173897                                             |
| 0.548030108                                 | 0.011738215                                        | 6.488988774                           | 0.009028313                                             |
| 0.569305519                                 | 0.027959304                                        | 5.843328757                           | 0.020351668                                             |
| 0.595442972                                 | 0.01349208                                         | 6.439270973                           | 0.009052937                                             |
| 0.568352518                                 | 0.004368974                                        | 6.78193911                            | 0.002916583                                             |
| 0.593156625                                 | 0.00617811                                         | 6.525141334                           | 0.004641566                                             |
| 0.526344639                                 | 0.009993589                                        | 6.716947707                           | 0.0065653                                               |
| 0.642082422                                 | 0.005436072                                        | 6.520724272                           | 0.003622429                                             |
| 0.546750691                                 | 0.01267879                                         | 6.689085975                           | 0.008131289                                             |
| 0.536957194                                 | 0.011201461                                        | 6.202327506                           | 0.009305291                                             |
| 0.515897305                                 | 0.019795504                                        | 5.886145873                           | 0.015038503                                             |
| 0.586139114                                 | 0.006581519                                        | 6.552394955                           | 0.004519522                                             |

| log.sigma.3.5.mm.3D_ngtdm_Coarseness | log.sigma.3.5.mm.3D_ngtdm_Complexity | log.sigma.3.5.mm.3D_ngtdm_Strength | log.sigma.3.5.mm.3D_ngtdm_Busyness | log.sigma.3.5.mm.3D_ngtdm_Contrast |
|--------------------------------------|--------------------------------------|------------------------------------|------------------------------------|------------------------------------|
| 0.00498656                           | 0.607419763                          | 2.801732799                        | 0.183300044                        | 4.64E-05                           |
| 0.01034898                           | 0.208069799                          | 1.529604963                        | 0.479941523                        | 7.05E-05                           |
| 0.007816434                          | 0.264852545                          | 1.975042693                        | 0.32138934                         | 3.88E-05                           |
| 0.011697222                          | 0.661025696                          | 3.633213364                        | 0.15273957                         | 0.000111479                        |
| 0.004363509                          | 0.210322328                          | 1.259684553                        | 0.432766048                        | 2.57E-05                           |
| 0.015407071                          | 0.606931453                          | 3.43729412                         | 0.244366649                        | 0.000170511                        |
| 0.001933712                          | 0.155697534                          | 1.081767387                        | 0.628766848                        | 7.61E-06                           |
| 0.002274074                          | 0.144120301                          | 1.12559454                         | 0.463839936                        | 9.46E-06                           |
| 0.00244362                           | 0.180184085                          | 1.149710639                        | 0.467721253                        | 1.21E-05                           |
| 0.010007836                          | 0.645380558                          | 4.591454422                        | 0.114721653                        | 5.82E-05                           |
| 0.00688523                           | 0.171639572                          | 1.13768188                         | 0.514579761                        | 4.43E-05                           |
| 0.004599588                          | 0.324793444                          | 2.009993432                        | 0.292059394                        | 2.50E-05                           |
| 0.006169264                          | 0.228361034                          | 2.517287212                        | 0.241592419                        | 1.94E-05                           |
| 0.00694189                           | 0.48149343                           | 3.409701982                        | 0.152205977                        | 3.55E-05                           |
| 0.00495259                           | 0.455229751                          | 2.2138081                          | 0.242261892                        | 3.55E-05                           |
| 0.002600199                          | 0.171172593                          | 1.028414625                        | 0.563204731                        | 1.46E-05                           |
| 0.008769438                          | 0.39879775                           | 2.498187026                        | 0.201322898                        | 6.01E-05                           |
| 0.008960211                          | 0.1928426                            | 1.569491965                        | 0.484707194                        | 5.49E-05                           |
| 0.00761931                           | 0.132767541                          | 0.975677159                        | 0.682978285                        | 4.77E-05                           |
| 0.002228865                          | 0.136137289                          | 0.909671998                        | 0.718938853                        | 1.15E-05                           |
| 0.004061466                          | 0.100841984                          | 1.101505185                        | 0.615866077                        | 1.18E-05                           |
| 0.009808466                          | 0.188906183                          | 1.274743971                        | 0.508045097                        | 7.09E-05                           |
| 0.010153903                          | 0.279446727                          | 1.925089489                        | 0.355804904                        | 7.29E-05                           |
| 0.003939874                          | 0.177594213                          | 1.163121495                        | 0.519677823                        | 1.87E-05                           |
| 0.007686942                          | 0.519317789                          | 2.574417324                        | 0.198908355                        | 5.61E-05                           |
| 0.0044401                            | 0.560229409                          | 3.189260865                        | 0.179464246                        | 2.37E-05                           |
| 0.003342763                          | 0.324900974                          | 1.965489828                        | 0.281690489                        | 1.95E-05                           |
| 0.00412855                           | 0.214165337                          | 1.49851696                         | 0.340145023                        | 1.72E-05                           |
| 0.02167661                           | 0.355178409                          | 2.631325376                        | 0.317309438                        | 0.000189709                        |
| 0.005116704                          | 0.18361859                           | 1.615067098                        | 0.354064888                        | 1.72E-05                           |
| 0.002329043                          | 0.162557076                          | 1.127928717                        | 0.472065107                        | 9.81E-06                           |
| 0.004934057                          | 0.245626854                          | 2.043976752                        | 0.247500596                        | 1.71E-05                           |
| 0.003618675                          | 0.288906989                          | 1.733492268                        | 0.32238904                         | 2.17E-05                           |
| 0.004656083                          | 0.308476828                          | 1.852821215                        | 0.29072636                         | 3.29E-05                           |
| 0.00240356                           | 0.139776835                          | 0.833848471                        | 0.677402731                        | 1.41E-05                           |
| 0.003610142                          | 0.2008517                            | 1.575621425                        | 0.349996515                        | 1.48E-05                           |
| 0.003115422                          | 0.240453576                          | 2.360745605                        | 0.221226003                        | 8.08E-06                           |
| 0.002501912                          | 0.20620567                           | 1.69282853                         | 0.316465402                        | 9.40E-06                           |
| 0.007799105                          | 0.102747892                          | 0.858798399                        | 0.597116469                        | 3.42E-05                           |
| 0.001706786                          | 0.101066828                          | 0.64606319                         | 1.040486989                        | 1.05E-05                           |
| 0.00434998                           | 0.253699796                          | 1.943143672                        | 0.264949964                        | 1.87E-05                           |
| 0.002864776                          | 0.284039185                          | 1.504076949                        | 0.442591964                        | 1.98E-05                           |
| 0.002894996                          | 0.207769565                          | 1.08678258                         | 0.486506438                        | 1.93E-05                           |
| 0.00403999                           | 0.358883661                          | 1.983205807                        | 0.293435234                        | 2.22E-05                           |
| 0.008184861                          | 0.285325742                          | 1.945626795                        | 0.395056015                        | 5.54E-05                           |
| 0.003739683                          | 0.276188851                          | 1.469595447                        | 0.378143794                        | 2.56E-05                           |
| 0.002370283                          | 0.155397985                          | 1.060825749                        | 0.531497444                        | 1.03E-05                           |
| 0.012929904                          | 0.149697714                          | 1.516507156                        | 0.540497014                        | 6.90E-05                           |
| 0.012481571                          | 0.43575958                           | 2.651801902                        | 0.231980607                        | 0.000100228                        |
| 0.008019515                          | 0.260308673                          | 2.083208019                        | 0.460363354                        | 4.28E-05                           |
| 0.00417674                           | 0.24262166                           | 1.378443254                        | 0.399939793                        | 3.13E-05                           |
| 0.003079333                          | 0.289668139                          | 1.362939826                        | 0.451116728                        | 2.14E-05                           |
| 0.002222788                          | 0.127324302                          | 0.795791402                        | 0.791652818                        | 1.08E-05                           |
| 0.008935351                          | 0.345786039                          | 1.690187934                        | 0.436377518                        | 8.35E-05                           |
| 0.007637126                          | 0.282263434                          | 1.416358574                        | 0.491824833                        | 8.15E-05                           |
| 0.005751475                          | 0.325876094                          | 2.782826158                        | 0.183795469                        | 2.04E-05                           |
| 0.002738166                          | 0.142357089                          | 0.794083149                        | 0.688261931                        | 2.16E-05                           |
| 0.003447854                          | 0.162480335                          | 1.350971471                        | 0.384816583                        | 1.66E-05                           |
| 0.006342858                          | 0.274925617                          | 1.603892136                        | 0.30182402                         | 3.43E-05                           |
| 0.001244363                          | 0.110192002                          | 0.75766176                         | 0.74680909                         | 4.64E-06                           |
| 0.00636064                           | 0.319402496                          | 2.61325276                         | 0.284109088                        | 2.60E-05                           |
| 0.004068929                          | 0.218589402                          | 1.474289989                        | 0.383435934                        | 2.12E-05                           |
| 0.001753148                          | 0.19171602                           | 1.139104796                        | 0.51129671                         | 8.15E-06                           |
| 0.001621443                          | 0.111769396                          | 0.951179342                        | 0.616769931                        | 5.40E-06                           |
| 0.012430811                          | 0.322665772                          | 1.824408887                        | 0.327850053                        | 0.000107316                        |
| 0.003145958                          | 0.182366824                          | 1.811939278                        | 0.303308439                        | 9.52E-06                           |
| 0.008657289                          | 0.184450423                          | 2.082220244                        | 0.252249993                        | 2.49E-05                           |
| 0.001907696                          | 0.171478182                          | 1.339250656                        | 0.42939938                         | 6.45E-06                           |
| 0.001956284                          | 0.152476785                          | 1.191233435                        | 0.477068006                        | 6.97E-06                           |
| 0.003812026                          | 0.10137632                           | 0.855115002                        | 0.639223342                        | 1.50E-05                           |
| 0.008119578                          | 0.443348421                          | 2.991252287                        | 0.181386167                        | 4.40E-05                           |
| 0.002715575                          | 0.183599048                          | 1.405427311                        | 0.409244195                        | 1.16E-05                           |
| 0.004772481                          | 0.345119248                          | 2.576528227                        | 0.212873321                        | 2.21E-05                           |
| 0.004788894                          | 0.324756293                          | 1.530066139                        | 0.329741566                        | 4.46E-05                           |
| 0.003454932                          | 0.254182401                          | 1.377256181                        | 0.516673267                        | 2.55E-05                           |
| 0.007281234                          | 0.306985191                          | 2.177929465                        | 0.244672598                        | 4.70E-05                           |
| 0.004557025                          | 0.120681976                          | 0.956088976                        | 0.599923787                        | 1.83E-05                           |
| 0.013138329                          | 0.332325047                          | 3.330073491                        | 0.210660745                        | 5.59E-05                           |
| 0.006218337                          | 0.18487327                           | 1.280025664                        | 0.4443071                          | 3.38E-05                           |
| 0.00462383                           | 0.448342076                          | 2.610946761                        | 0.209781437                        | 3.61E-05                           |
| 0.005395708                          | 0.555238637                          | 2.711432323                        | 0.191414455                        | 5.53E-05                           |
| 0.006088717                          | 0.339267079                          | 2.342919484                        | 0.271480826                        | 2.73E-05                           |
| 0.003285519                          | 0.222325878                          | 1.469885789                        | 0.37464743                         | 1.60E-05                           |
| 0.003812204                          | 0.107708623                          | 1.032128788                        | 0.535415177                        | 1.45E-05                           |
| 0.004527628                          | 0.344289141                          | 1.992474515                        | 0.303908326                        | 2.99E-05                           |
| 0.008082089                          | 0.102968962                          | 1.25660636                         | 0.441778876                        | 3.20E-05                           |
| 0.00457296                           | 0.305873759                          | 1.730267718                        | 0.297059294                        | 3.62E-05                           |
| 0.003982705                          | 0.226682458                          | 1.442182861                        | 0.411399386                        | 2.13E-05                           |
| 0.006924369                          | 0.263777562                          | 1.780589596                        | 0.345357576                        | 4.04E-05                           |
| 0.005762109                          | 0.240944952                          | 2.124939862                        | 0.261586255                        | 2.26E-05                           |
| 0.007707922                          | 0.128762574                          | 1.144749178                        | 0.841021854                        | 6.19E-05                           |
| 0.004386414                          | 0.224488134                          | 1.156828275                        | 0.564236494                        | 4.15E-05                           |
| 0.002183136                          | 0.167052635                          | 1.223493961                        | 0.441818691                        | 8.78E-06                           |
| 0.003219595                          | 0.203607861                          | 1.35724262                         | 0.399433587                        | 1.50E-05                           |
| 0.00247391                           | 0.113345649                          | 0.700591571                        | 0.791783774                        | 1.41E-05                           |
| 0.003426569                          | 0.276219744                          | 1.907956013                        | 0.286672996                        | 1.69E-05                           |
| 0.004287431                          | 0.143486862                          | 1.080037489                        | 0.594007802                        | 2.67E-05                           |
| 0.011051417                          | 0.469019163                          | 4.877796691                        | 0.112399665                        | 5.07E-05                           |
| 0.013159564                          | 0.208780715                          | 2.056433639                        | 0.258533873                        | 5.35E-05                           |
| 0.001845098                          | 0.093531044                          | 0.570173932                        | 0.990755469                        | 9.44E-06                           |

| log.sigma.3.0.mm.3D_gldm_GrayLevelVariance | log.sigma.3.0.mm.3D_gldm_HighGrayLevelEmphasis | log.sigma.3.0.mm.3D_gldm_GrayLevelNonUniformityNormalized | log.sigma.3.0.mm.3D_gldm_DependenceEntropy |
|--------------------------------------------|------------------------------------------------|-----------------------------------------------------------|--------------------------------------------|
| 31.75323637                                | 567.0584354                                    | 0.060222737                                               | 6.77465911                                 |
| 10.04803569                                | 135.7037433                                    | 0.109542738                                               | 6.252371193                                |
| 13.45240052                                | 171.2053455                                    | 0.081682642                                               | 6.804111159                                |
| 24.96264859                                | 343.8976459                                    | 0.062612032                                               | 6.756242845                                |
| 15.32117404                                | 284.0291385                                    | 0.081443814                                               | 6.745555784                                |
| 21.36318641                                | 198.5757576                                    | 0.071611157                                               | 6.471749488                                |
| 16.28810294                                | 423.6549283                                    | 0.079041483                                               | 6.849134733                                |
| 17.04307104                                | 521.6294049                                    | 0.082455607                                               | 6.751943671                                |
| 18.2172205                                 | 522.9736032                                    | 0.069215715                                               | 6.909335931                                |
| 18.00020101                                | 495.3330224                                    | 0.072578456                                               | 6.596186456                                |
| 11.02223156                                | 170.5384615                                    | 0.09026395                                                | 6.487156646                                |
| 18.8824566                                 | 412.9006508                                    | 0.075258257                                               | 6.750507418                                |
| 12.55898389                                | 306.2581682                                    | 0.129473111                                               | 6.680300271                                |
| 22.82977481                                | 589.7245195                                    | 0.075631706                                               | 6.776277045                                |
| 21.57431402                                | 458.4138105                                    | 0.075690707                                               | 6.614743495                                |
| 18.52490478                                | 339.2671389                                    | 0.07455679                                                | 6.894778665                                |
| 16.11330873                                | 255.3777219                                    | 0.07804657                                                | 6.470278453                                |
| 11.9996106                                 | 128.6326034                                    | 0.105455607                                               | 6.493339863                                |
| 8.668291386                                | 142.03698                                      | 0.105745238                                               | 6.467990081                                |
| 18.85813017                                | 360.8128486                                    | 0.071625734                                               | 6.894122522                                |
| 10.21265054                                | 200.8151455                                    | 0.110205438                                               | 6.704824441                                |
| 10.57665037                                | 134.0769231                                    | 0.088178479                                               | 6.342497854                                |
| 13.15647793                                | 179.5009766                                    | 0.092496872                                               | 6.501625468                                |
| 12.74889208                                | 210.1582924                                    | 0.0846879                                                 | 6.680484256                                |
| 17.16974272                                | 399.3676355                                    | 0.081022308                                               | 6.659761222                                |
| 25.31908903                                | 589.7475728                                    | 0.064641232                                               | 6.73796175                                 |
| 23.97869309                                | 391.2350758                                    | 0.070213424                                               | 6.946292736                                |
| 15.3747084                                 | 399.0778421                                    | 0.085071213                                               | 6.667658655                                |
| 9.977128157                                | 130.4854586                                    | 0.098068656                                               | 5.977742438                                |
| 10.10146327                                | 236.1689387                                    | 0.103375369                                               | 6.490251592                                |
| 16.44038858                                | 428.6635141                                    | 0.081488649                                               | 6.853941281                                |
| 12.16350551                                | 353.618173                                     | 0.115311039                                               | 6.475569133                                |
| 24.24540474                                | 394.0065036                                    | 0.063198075                                               | 6.959042412                                |
| 21.11259846                                | 375.753617                                     | 0.072297691                                               | 6.81332258                                 |
| 17.06918711                                | 303.7654405                                    | 0.071862567                                               | 6.735497101                                |
| 14.39699751                                | 385.6048683                                    | 0.090612509                                               | 6.715955784                                |
| 15.43748263                                | 634.3117442                                    | 0.10474835                                                | 6.778779862                                |
| 21.55787119                                | 577.7444294                                    | 0.084288469                                               | 7.153844404                                |
| 6.332291625                                | 154.9739837                                    | 0.121032454                                               | 6.107230067                                |
| 21.9260195                                 | 288.5001376                                    | 0.060616579                                               | 6.9252365                                  |
| 16.7344263                                 | 329.2906708                                    | 0.095516966                                               | 6.669451569                                |
| 26.13483469                                | 356.2236876                                    | 0.057825129                                               | 6.772892116                                |
| 18.67573678                                | 361.4678347                                    | 0.067955876                                               | 6.798862314                                |
| 19.07434787                                | 522.073955                                     | 0.076126177                                               | 6.710245073                                |
| 14.97552416                                | 189.2237872                                    | 0.084340507                                               | 6.504928661                                |
| 18.86561226                                | 409.6659381                                    | 0.072362202                                               | 6.771071762                                |
| 16.59568753                                | 388.6238492                                    | 0.081793905                                               | 6.773329088                                |
| 8.597581728                                | 108.1159587                                    | 0.112689665                                               | 6.387512857                                |
| 17.01050951                                | 216.2150411                                    | 0.073712961                                               | 6.417293136                                |
| 13.08652916                                | 145.966716                                     | 0.094985295                                               | 6.648232208                                |
| 20.44549765                                | 424.5196575                                    | 0.068369294                                               | 6.731213553                                |
| 22.38722783                                | 310.268763                                     | 0.062767822                                               | 6.685720837                                |
| 13.85677889                                | 229.7096631                                    | 0.083361725                                               | 6.657897102                                |
| 14.56300869                                | 140.6775362                                    | 0.0784056                                                 | 6.457148135                                |
| 16.78403584                                | 236.4699248                                    | 0.07093674                                                | 6.550077581                                |
| 14.69040789                                | 580.105641                                     | 0.088958317                                               | 6.506699613                                |
| 19.62738194                                | 356.9421508                                    | 0.067016705                                               | 6.803970157                                |
| 17.6005785                                 | 428.055234                                     | 0.087295083                                               | 6.749400802                                |
| 14.11822767                                | 273.4884709                                    | 0.088073805                                               | 6.451096482                                |
| 18.63257345                                | 507.9828021                                    | 0.071265849                                               | 7.112099685                                |
| 15.12964945                                | 265.1670442                                    | 0.100420168                                               | 6.754175091                                |
| 15.27899676                                | 390.506367                                     | 0.08005639                                                | 6.72541683                                 |
| 18.36859746                                | 488.3047158                                    | 0.074517253                                               | 6.824559105                                |
| 18.08459582                                | 528.8042765                                    | 0.076698178                                               | 6.911454219                                |
| 11.62360038                                | 143.1177215                                    | 0.085374139                                               | 6.382175955                                |
| 15.74253834                                | 475.4241326                                    | 0.095014671                                               | 6.763391882                                |
| 8.668483477                                | 319.7147239                                    | 0.130276356                                               | 6.460373329                                |
| 19.07727862                                | 509.80256                                      | 0.078894899                                               | 6.893086752                                |
| 17.71696435                                | 500.6057709                                    | 0.075217387                                               | 6.809158663                                |
| 9.518257993                                | 228.0641822                                    | 0.103227709                                               | 6.579299198                                |
| 15.49623474                                | 320.7097768                                    | 0.082248973                                               | 6.56467801                                 |
| 18.05175673                                | 448.425641                                     | 0.078861993                                               | 6.832295347                                |
| 18.5207233                                 | 505.4791575                                    | 0.081421245                                               | 6.706788027                                |
| 25.67864982                                | 371.9614874                                    | 0.062510276                                               | 6.76051793                                 |
| 22.39681548                                | 284.8968381                                    | 0.061858517                                               | 6.811791647                                |
| 14.35201648                                | 349.8532042                                    | 0.095885315                                               | 6.497442622                                |
| 9.706431107                                | 182.6464942                                    | 0.101834304                                               | 6.588423292                                |
| 13.74074054                                | 205.9885177                                    | 0.096218636                                               | 6.488885711                                |
| 11.72781843                                | 202.5301699                                    | 0.092513716                                               | 6.551333893                                |
| 27.95084484                                | 491.3689611                                    | 0.064172193                                               | 6.779358349                                |
| 32.00456407                                | 521.5062846                                    | 0.06113539                                                | 6.73666221                                 |
| 16.49335419                                | 196.9244024                                    | 0.085320391                                               | 6.739988375                                |
| 16.37414065                                | 381.0801468                                    | 0.080113053                                               | 6.834485711                                |
| 11.1604969                                 | 221.301985                                     | 0.093011373                                               | 6.569158439                                |
| 21.72490994                                | 300.1590816                                    | 0.065030281                                               | 6.797799211                                |
| 8.177635593                                | 215.9928198                                    | 0.125112483                                               | 6.507091295                                |
| 23.56622602                                | 401.1962264                                    | 0.0720789                                                 | 6.917359438                                |
| 16.88521319                                | 240.3997082                                    | 0.076984648                                               | 6.805789831                                |
| 13.17851384                                | 244.1188525                                    | 0.0893549                                                 | 6.681935291                                |
| 14.46929822                                | 367.1298765                                    | 0.090885414                                               | 6.750254051                                |
| 10.57471995                                | 108.5452454                                    | 0.127513503                                               | 6.390980661                                |
| 19.94140228                                | 272.1003359                                    | 0.065611735                                               | 6.740085479                                |
| 18.91139278                                | 420.3017557                                    | 0.075360688                                               | 6.77016216                                 |
| 15.88871065                                | 386.4978788                                    | 0.083002755                                               | 6.745164477                                |
| 15.72163217                                | 301.8382353                                    | 0.075175988                                               | 6.666151259                                |
| 22.23965738                                | 544.5932203                                    | 0.075810899                                               | 6.998214394                                |
| 16.56852401                                | 219.5374512                                    | 0.075068216                                               | 6.779697565                                |
| 15.49091825                                | 339.5940783                                    | 0.104816691                                               | 6.568477676                                |
| 8.605552968                                | 201.1294964                                    | 0.107997056                                               | 6.334480857                                |
| 13.27722256                                | 277.9733287                                    | 0.092509283                                               | 6.74938421                                 |

| log.sigma.3.0.mm.3D_gldm_DependenceNonUniformity | log.sigma.3.0.mm.3D_gldm_GrayLevelNonUniformity | log.sigma.3.0.mm.3D_gldm_SmallDependenceEmphasis |
|--------------------------------------------------|-------------------------------------------------|--------------------------------------------------|
| 400.8124411                                      | 127.7926484                                     | 0.343125706                                      |
| 123.3294118                                      | 102.4224599                                     | 0.186823622                                      |
| 190.8956975                                      | 125.3011734                                     | 0.206356888                                      |
| 170.037871                                       | 61.17195496                                     | 0.29678685                                       |
| 342.8462838                                      | 192.8589527                                     | 0.240958763                                      |
| 108.5333333                                      | 47.26363636                                     | 0.268536315                                      |
| 814.8701115                                      | 446.6634224                                     | 0.23473443                                       |
| 704.968285                                       | 421.183242                                      | 0.219145586                                      |
| 694.1033876                                      | 314.6546414                                     | 0.256964559                                      |
| 173.1865672                                      | 77.80410448                                     | 0.271622632                                      |
| 227.3395225                                      | 136.1180371                                     | 0.242174294                                      |
| 355.6872017                                      | 173.470282                                      | 0.2662205                                        |
| 174.033744                                       | 241.7262989                                     | 0.15677206                                       |
| 260.1228888                                      | 129.8596389                                     | 0.247213522                                      |
| 324.9858871                                      | 150.1703629                                     | 0.294663462                                      |
| 618.6115174                                      | 326.2605119                                     | 0.24051339                                       |
| 207.5293132                                      | 93.18760469                                     | 0.255312425                                      |
| 144.0851582                                      | 130.026764                                      | 0.178883398                                      |
| 167.1571649                                      | 137.257319                                      | 0.189028621                                      |
| 793.8559338                                      | 372.3821889                                     | 0.246322415                                      |
| 313.9265873                                      | 333.2612434                                     | 0.153539336                                      |
| 176.9647822                                      | 95.14457831                                     | 0.214462864                                      |
| 140.8691406                                      | 94.71679688                                     | 0.233266301                                      |
| 386.6955043                                      | 224.1688704                                     | 0.229695575                                      |
| 183.683425                                       | 103.1413983                                     | 0.249911546                                      |
| 428.9392149                                      | 153.1350781                                     | 0.30412112                                       |
| 489.0167028                                      | 227                                             | 0.272097908                                      |
| 393.0724113                                      | 234.9666908                                     | 0.232988498                                      |
| 77.2147651                                       | 43.83668904                                     | 0.20453468                                       |
| 272.7497566                                      | 212.3330088                                     | 0.191833929                                      |
| 628.0937369                                      | 387.7229929                                     | 0.231710267                                      |
| 240.4557757                                      | 238.5785404                                     | 0.185358276                                      |
| 524.1619697                                      | 204.0665841                                     | 0.278142166                                      |
| 362.6834043                                      | 169.8995745                                     | 0.252405112                                      |
| 714.2048138                                      | 316.482743                                      | 0.265848368                                      |
| 375.9263088                                      | 271.7469156                                     | 0.212969634                                      |
| 419.7411986                                      | 389.7686106                                     | 0.196211329                                      |
| 575.8649487                                      | 435.0127882                                     | 0.21211416                                       |
| 167.8650407                                      | 148.8699187                                     | 0.17221764                                       |
| 1270.444292                                      | 440.6825309                                     | 0.262738315                                      |
| 327.3708558                                      | 247.77101                                       | 0.221208808                                      |
| 797.8973364                                      | 223.609775                                      | 0.33979421                                       |
| 597.9756365                                      | 248.2428141                                     | 0.260068245                                      |
| 393.7532154                                      | 189.4019293                                     | 0.2725648                                        |
| 190.4600939                                      | 107.7871674                                     | 0.221193614                                      |
| 433.856102                                       | 198.6342441                                     | 0.279878868                                      |
| 656.1613327                                      | 373.1437966                                     | 0.23950028                                       |
| 108.8094145                                      | 98.15269805                                     | 0.172430372                                      |
| 154.9388954                                      | 62.72972973                                     | 0.259519066                                      |
| 155.8032544                                      | 128.4201183                                     | 0.189083665                                      |
| 440.3079019                                      | 175.6407162                                     | 0.25998442                                       |
| 673.4556511                                      | 211.5903293                                     | 0.317492165                                      |
| 692.4259752                                      | 376.1281028                                     | 0.243071196                                      |
| 180.6630435                                      | 86.55978261                                     | 0.259544054                                      |
| 222.6586466                                      | 94.34586466                                     | 0.260037243                                      |
| 287.6748718                                      | 173.4687179                                     | 0.218843993                                      |
| 679.8484549                                      | 271.0825711                                     | 0.279109003                                      |
| 463.8629265                                      | 301.8663968                                     | 0.220612636                                      |
| 255.2184466                                      | 145.1456311                                     | 0.246508962                                      |
| 1267.954321                                      | 650.5859349                                     | 0.240533181                                      |
| 208.4575311                                      | 177.3420159                                     | 0.218705972                                      |
| 391.4089888                                      | 213.7505618                                     | 0.249091172                                      |
| 897.3485922                                      | 431.3803766                                     | 0.27339403                                       |
| 1092.393415                                      | 584.6702086                                     | 0.222909478                                      |
| 122.1949367                                      | 67.44556962                                     | 0.206493667                                      |
| 465.744174                                       | 366.9466598                                     | 0.207074072                                      |
| 133.5521472                                      | 169.8803681                                     | 0.169678036                                      |
| 906.94848                                        | 493.09312                                       | 0.235356776                                      |
| 900.3143247                                      | 440.5482329                                     | 0.273301808                                      |
| 349.5279503                                      | 299.1538992                                     | 0.194545474                                      |
| 197.0138568                                      | 106.8414165                                     | 0.229516233                                      |
| 584.4368298                                      | 338.3179487                                     | 0.220716889                                      |
| 338.7955244                                      | 185.5590171                                     | 0.233415805                                      |
| 413.5037627                                      | 141.2107127                                     | 0.312314645                                      |
| 584.2117534                                      | 193.6790163                                     | 0.303694462                                      |
| 187.8897168                                      | 128.6780924                                     | 0.214583278                                      |
| 298.8196995                                      | 243.9949917                                     | 0.197623377                                      |
| 125.0334029                                      | 92.17745303                                     | 0.188924075                                      |
| 249.0831869                                      | 157.9209139                                     | 0.221093365                                      |
| 431.761864                                       | 150.0987602                                     | 0.309219126                                      |
| 375.2282554                                      | 121.5982906                                     | 0.337654455                                      |
| 247.7871039                                      | 153.4913841                                     | 0.264958893                                      |
| 454.8244111                                      | 261.8895687                                     | 0.224002452                                      |
| 437.7881549                                      | 285.8239505                                     | 0.181282519                                      |
| 419.0926609                                      | 158.6088561                                     | 0.277684352                                      |
| 158.8537859                                      | 191.6723238                                     | 0.120523292                                      |
| 358.9563941                                      | 171.9081761                                     | 0.264648164                                      |
| 391.9540481                                      | 211.0919037                                     | 0.232820517                                      |
| 198.1188525                                      | 130.8155738                                     | 0.217948204                                      |
| 254.4291358                                      | 184.042963                                      | 0.207362542                                      |
| 124.9723926                                      | 166.2776074                                     | 0.164076984                                      |
| 431.0344249                                      | 156.2871537                                     | 0.29712699                                       |
| 827.4831179                                      | 390.5944434                                     | 0.256929269                                      |
| 475.969697                                       | 273.9090909                                     | 0.248566326                                      |
| 731.4140625                                      | 327.1659007                                     | 0.266103866                                      |
| 452.7884278                                      | 259.4248977                                     | 0.254706854                                      |
| 426.7302094                                      | 211.4671636                                     | 0.230909872                                      |
| 125.6456543                                      | 109.7430755                                     | 0.198128403                                      |
| 107.7721823                                      | 90.06954436                                     | 0.187006192                                      |
| 707.3207482                                      | 534.1485972                                     | 0.207365889                                      |

| log.sigma.3.0.mm.3D_gldm_DependenceNonUniformityNormalized | log.sigma.3.0.mm.3D_gldm_DependenceVariance | log.sigma.3.0.mm.3D_gldm_LargeDependenceEmphasis |
|------------------------------------------------------------|---------------------------------------------|--------------------------------------------------|
| 0.188884279                                                | 3.749962024                                 | 12.54194156                                      |
| 0.131903114                                                | 5.413622351                                 | 22.64278075                                      |
| 0.124443088                                                | 7.025127106                                 | 25.2125163                                       |
| 0.17404081                                                 | 4.312545769                                 | 14.7011259                                       |
| 0.144783059                                                | 5.235082633                                 | 19.12077703                                      |
| 0.164444444                                                | 3.778751148                                 | 14.93030303                                      |
| 0.144199276                                                | 7.075843806                                 | 22.02211998                                      |
| 0.138012585                                                | 5.795170442                                 | 21.20555991                                      |
| 0.152684423                                                | 4.794876986                                 | 17.42190937                                      |
| 0.161554634                                                | 3.892208732                                 | 15.16977612                                      |
| 0.150755652                                                | 5.516720726                                 | 19.07161804                                      |
| 0.154311115                                                | 4.718521746                                 | 17.00347072                                      |
| 0.093215717                                                | 15.39518586                                 | 46.67005892                                      |
| 0.151498479                                                | 5.039122632                                 | 18.14967967                                      |
| 0.163803371                                                | 4.565043534                                 | 15.63810484                                      |
| 0.141364606                                                | 6.747299546                                 | 21.71160878                                      |
| 0.173810145                                                | 3.33416384                                  | 14.04690117                                      |
| 0.116857387                                                | 7.05426534                                  | 27.4541768                                       |
| 0.128780558                                                | 7.140735658                                 | 25.80739599                                      |
| 0.152693967                                                | 4.982064515                                 | 17.99557607                                      |
| 0.103811702                                                | 11.18731585                                 | 37.79298942                                      |
| 0.164008139                                                | 3.277585998                                 | 15.76552363                                      |
| 0.13756752                                                 | 6.49779892                                  | 21.98632813                                      |
| 0.146088215                                                | 5.617940148                                 | 19.94446543                                      |
| 0.144291771                                                | 5.159236274                                 | 18.90102121                                      |
| 0.181063409                                                | 3.127695018                                 | 12.44449135                                      |
| 0.151257873                                                | 5.889475884                                 | 18.84101454                                      |
| 0.142314414                                                | 5.47661996                                  | 19.95076032                                      |
| 0.172739967                                                | 3.220885946                                 | 15.51006711                                      |
| 0.13278956                                                 | 5.542643655                                 | 22.54722493                                      |
| 0.132007931                                                | 6.68321433                                  | 22.78436318                                      |
| 0.116218355                                                | 7.447539818                                 | 27.80425326                                      |
| 0.162329504                                                | 4.173462066                                 | 15.42056364                                      |
| 0.154333364                                                | 7.986755274                                 | 22.04765957                                      |
| 0.162171847                                                | 4.290685497                                 | 15.8760218                                       |
| 0.125350553                                                | 8.350877435                                 | 26.66722241                                      |
| 0.112803332                                                | 9.329385337                                 | 30.77317925                                      |
| 0.11158011                                                 | 18.38664561                                 | 44.34508816                                      |
| 0.136475643                                                | 4.644288453                                 | 21.86341463                                      |
| 0.174751622                                                | 3.584296794                                 | 14.20275103                                      |
| 0.126203106                                                | 6.769994097                                 | 23.99537394                                      |
| 0.206334972                                                | 2.482681431                                 | 10.0804241                                       |
| 0.163694398                                                | 3.766519297                                 | 15.12044895                                      |
| 0.158260939                                                | 4.327549731                                 | 16.00482315                                      |
| 0.149029807                                                | 4.58540462                                  | 18.46948357                                      |
| 0.158053225                                                | 5.284201977                                 | 17.23387978                                      |
| 0.143831945                                                | 5.736748555                                 | 19.99473915                                      |
| 0.124924701                                                | 7.759981335                                 | 27.73708381                                      |
| 0.182066857                                                | 3.165240037                                 | 13.37367803                                      |
| 0.115239094                                                | 8.335606246                                 | 29.20266272                                      |
| 0.171392722                                                | 3.778851083                                 | 14.76488906                                      |
| 0.19977919                                                 | 2.626753696                                 | 10.79946603                                      |
| 0.153463204                                                | 4.612357394                                 | 17.4304078                                       |
| 0.163644061                                                | 3.987788148                                 | 15.47644928                                      |
| 0.167412516                                                | 3.961894963                                 | 15.19699248                                      |
| 0.147525575                                                | 4.398696647                                 | 18.35179487                                      |
| 0.168071311                                                | 3.829542248                                 | 14.54808405                                      |
| 0.134141968                                                | 5.744681364                                 | 21.51417004                                      |
| 0.154865562                                                | 3.947166026                                 | 16.37621359                                      |
| 0.138893014                                                | 8.900597287                                 | 25.09661518                                      |
| 0.118039372                                                | 10.07219417                                 | 30.30690827                                      |
| 0.146595127                                                | 5.845774804                                 | 19.72209738                                      |
| 0.155009258                                                | 5.526062334                                 | 18.01848333                                      |
| 0.143302298                                                | 5.263064964                                 | 19.81254099                                      |
| 0.154677135                                                | 4.311193719                                 | 18.17974684                                      |
| 0.120596627                                                | 7.805407748                                 | 26.74210254                                      |
| 0.102417291                                                | 10.28255674                                 | 35.80674847                                      |
| 0.145111757                                                | 5.431742054                                 | 19.54048                                         |
| 0.153715951                                                | 4.814776766                                 | 17.03551306                                      |
| 0.120610059                                                | 6.970652519                                 | 26.1573499                                       |
| 0.151665787                                                | 4.240063862                                 | 17.43725943                                      |
| 0.136232361                                                | 5.776771263                                 | 21.32867133                                      |
| 0.14865973                                                 | 5.544760419                                 | 19.50460728                                      |
| 0.183047261                                                | 3.885649081                                 | 13.40283311                                      |
| 0.186589509                                                | 3.392235423                                 | 12.63142766                                      |
| 0.140007241                                                | 6.433538927                                 | 22.33830104                                      |
| 0.124716068                                                | 7.630345233                                 | 26.54340568                                      |
| 0.130515034                                                | 5.954402221                                 | 23.58037578                                      |
| 0.14591868                                                 | 5.884444252                                 | 20.56766257                                      |
| 0.184592503                                                | 3.314090991                                 | 12.50491663                                      |
| 0.188651712                                                | 3.768282113                                 | 12.64203117                                      |
| 0.137736022                                                | 7.312868832                                 | 22.34519177                                      |
| 0.139132582                                                | 7.648466864                                 | 23.70480269                                      |
| 0.14246279                                                 | 4.37445079                                  | 20.29384966                                      |
| 0.171829709                                                | 3.540558718                                 | 13.97088971                                      |
| 0.103690461                                                | 9.275818228                                 | 37.56266319                                      |
| 0.150505826                                                | 6.812784304                                 | 20.44234801                                      |
| 0.142944584                                                | 6.355703031                                 | 21.26622903                                      |
| 0.135327085                                                | 6.28961562                                  | 22.30054645                                      |
| 0.125644018                                                | 6.531915501                                 | 24.2217284                                       |
| 0.095837724                                                | 11.04521011                                 | 39.15797546                                      |
| 0.180954838                                                | 3.53324084                                  | 13.16876574                                      |
| 0.159653312                                                | 4.450769221                                 | 16.47559329                                      |
| 0.144233242                                                | 5.774014325                                 | 19.82969697                                      |
| 0.168063893                                                | 3.702202292                                 | 14.62316176                                      |
| 0.132316899                                                | 8.918599388                                 | 25.47983635                                      |
| 0.151483922                                                | 4.369717859                                 | 17.59637913                                      |
| 0.1200054                                                  | 7.127513093                                 | 26.45558739                                      |
| 0.12922324                                                 | 6.117431235                                 | 24.05275779                                      |
| 0.122500996                                                | 8.684672605                                 | 27.77797021                                      |



| log.sigma.3.0.mm.3D_gldm_LargeDependenceLowGrayLevelEmphasis | log.sigma.3.0.mm.3D_gldm_SmallDependenceHighGrayLevelEmphasis | log.sigma.3.0.mm.3D_gldm_LargeDependenceHighGrayLevelEmphasis |
|--------------------------------------------------------------|---------------------------------------------------------------|---------------------------------------------------------------|
| 0.029153218                                                  | 183.4579453                                                   | 7276.079171                                                   |
| 0.225553571                                                  | 28.1936052                                                    | 2721.147594                                                   |
| 0.213020853                                                  | 37.48298558                                                   | 3706.107562                                                   |
| 0.059785547                                                  | 96.07393324                                                   | 5066.558854                                                   |
| 0.082945277                                                  | 65.27705016                                                   | 5368.542652                                                   |
| 0.12426308                                                   | 55.11433265                                                   | 2701.357576                                                   |
| 0.062816872                                                  | 103.0936343                                                   | 8340.222615                                                   |
| 0.046965951                                                  | 118.536097                                                    | 10231.24608                                                   |
| 0.037743699                                                  | 130.0797621                                                   | 8899.690717                                                   |
| 0.035630574                                                  | 129.804014                                                    | 7379.969216                                                   |
| 0.138617401                                                  | 38.45588208                                                   | 3173.942971                                                   |
| 0.048541558                                                  | 107.1544387                                                   | 6765.849892                                                   |
| 0.177005607                                                  | 48.68766638                                                   | 12896.28066                                                   |
| 0.036680156                                                  | 141.0451536                                                   | 10220.61328                                                   |
| 0.038057284                                                  | 122.6727059                                                   | 7176.217238                                                   |
| 0.08283895                                                   | 82.91093184                                                   | 6591.069241                                                   |
| 0.073654653                                                  | 59.66956343                                                   | 3768.732831                                                   |
| 0.289226237                                                  | 24.16636352                                                   | 3112.334144                                                   |
| 0.233325334                                                  | 26.46513162                                                   | 3300.306626                                                   |
| 0.061473183                                                  | 91.89643728                                                   | 6050.27813                                                    |
| 0.235308926                                                  | 31.80446123                                                   | 6622.987103                                                   |
| 0.165937148                                                  | 28.58577482                                                   | 2044.83874                                                    |
| 0.16858121                                                   | 44.4098524                                                    | 3498.663086                                                   |
| 0.122834022                                                  | 49.44202805                                                   | 3865.685304                                                   |
| 0.057616816                                                  | 99.77841562                                                   | 6981.329929                                                   |
| 0.025031508                                                  | 178.8668445                                                   | 7149.795694                                                   |
| 0.064912793                                                  | 108.9229631                                                   | 6900.505722                                                   |
| 0.056325214                                                  | 90.58020394                                                   | 7681.851195                                                   |
| 0.175390915                                                  | 28.72142089                                                   | 1738.991051                                                   |
| 0.106532984                                                  | 43.87561772                                                   | 5264.391918                                                   |
| 0.062565949                                                  | 99.85910211                                                   | 9037.122951                                                   |
| 0.086946882                                                  | 59.8718194                                                    | 10013.94877                                                   |
| 0.057119062                                                  | 106.9405396                                                   | 6112.342211                                                   |
| 0.0860689                                                    | 89.80704828                                                   | 7610.113617                                                   |
| 0.068940615                                                  | 82.81309085                                                   | 4516.419391                                                   |
| 0.086103485                                                  | 84.43208819                                                   | 9136.743248                                                   |
| 0.051399406                                                  | 120.3622698                                                   | 19119.3233                                                    |
| 0.092085165                                                  | 126.0366289                                                   | 22400.94303                                                   |
| 0.15407383                                                   | 24.19822654                                                   | 3591.291057                                                   |
| 0.069610375                                                  | 78.44383999                                                   | 3927.767813                                                   |
| 0.087433931                                                  | 66.11366841                                                   | 8172.104857                                                   |
| 0.039273915                                                  | 123.925276                                                    | 3498.030773                                                   |
| 0.050977856                                                  | 91.16494559                                                   | 5341.173282                                                   |
| 0.032488389                                                  | 132.4404448                                                   | 8684.573151                                                   |
| 0.130619546                                                  | 42.94040414                                                   | 3138.707355                                                   |
| 0.051707655                                                  | 114.7720957                                                   | 6531.214208                                                   |
| 0.062025298                                                  | 97.02502904                                                   | 7188.224463                                                   |
| 0.343770381                                                  | 20.11145409                                                   | 2659.032147                                                   |
| 0.082797331                                                  | 52.50911614                                                   | 2920.854289                                                   |
| 0.300636168                                                  | 31.40558906                                                   | 3482.997781                                                   |
| 0.043071314                                                  | 108.0450152                                                   | 6168.585053                                                   |
| 0.051280352                                                  | 98.20795497                                                   | 3336.799169                                                   |
| 0.093143194                                                  | 55.0328698                                                    | 3903.007979                                                   |
| 0.198618522                                                  | 38.66769184                                                   | 1819.380435                                                   |
| 0.090640346                                                  | 63.94316221                                                   | 3179.549624                                                   |
| 0.033489889                                                  | 122.9890699                                                   | 10703.60513                                                   |
| 0.049973947                                                  | 97.06518263                                                   | 5051.550309                                                   |
| 0.057551899                                                  | 89.43902719                                                   | 9214.125506                                                   |
| 0.069153677                                                  | 63.94282342                                                   | 4476.949636                                                   |
| 0.058087004                                                  | 121.2341908                                                   | 11792.92047                                                   |
| 0.137731734                                                  | 62.15210583                                                   | 7141.256512                                                   |
| 0.058313038                                                  | 96.29209922                                                   | 7330.017978                                                   |
| 0.043742295                                                  | 132.5422431                                                   | 8219.732942                                                   |
| 0.042911108                                                  | 122.7703245                                                   | 9893.278893                                                   |
| 0.183404525                                                  | 30.98694178                                                   | 2356.31519                                                    |
| 0.064610899                                                  | 101.7739612                                                   | 11797.27965                                                   |
| 0.121522058                                                  | 48.95080917                                                   | 11431.05215                                                   |
| 0.046507436                                                  | 118.8745554                                                   | 9796.77152                                                    |
| 0.036032899                                                  | 126.9983764                                                   | 8796.466792                                                   |
| 0.133530256                                                  | 44.34853494                                                   | 5581.52795                                                    |
| 0.066607724                                                  | 69.83415294                                                   | 5599.670516                                                   |
| 0.056988078                                                  | 99.1493413                                                    | 8704.459207                                                   |
| 0.044399287                                                  | 116.0160837                                                   | 9540.43484                                                    |
| 0.051527902                                                  | 105.1418964                                                   | 5267.181496                                                   |
| 0.063867422                                                  | 90.20626641                                                   | 3356.255509                                                   |
| 0.072961197                                                  | 65.12694417                                                   | 8245.693741                                                   |
| 0.177874621                                                  | 38.21356282                                                   | 4394.244157                                                   |
| 0.148166621                                                  | 42.39212735                                                   | 4295.126305                                                   |
| 0.126373861                                                  | 46.43602853                                                   | 3999.261277                                                   |
| 0.031094934                                                  | 141.391322                                                    | 6574.287302                                                   |
| 0.035014081                                                  | 169.0711353                                                   | 6703.892408                                                   |
| 0.1504222                                                    | 53.30456089                                                   | 4384.171762                                                   |
| 0.084514506                                                  | 85.87610845                                                   | 8086.996329                                                   |
| 0.11788833                                                   | 38.61519514                                                   | 4560.587374                                                   |
| 0.067884208                                                  | 80.13549923                                                   | 4274.533825                                                   |
| 0.200952351                                                  | 27.22312464                                                   | 7529.860966                                                   |
| 0.059801156                                                  | 97.63391848                                                   | 8469.180294                                                   |
| 0.124493889                                                  | 57.07689113                                                   | 4452.270605                                                   |
| 0.114715573                                                  | 53.73893948                                                   | 5141.695355                                                   |
| 0.074584753                                                  | 71.03591324                                                   | 8679.055802                                                   |
| 0.562038451                                                  | 21.69026133                                                   | 3155.617331                                                   |
| 0.066413584                                                  | 78.94592757                                                   | 3447.009656                                                   |
| 0.0446742                                                    | 101.726045                                                    | 6989.773876                                                   |
| 0.058649358                                                  | 92.55469387                                                   | 7381.043939                                                   |
| 0.056475617                                                  | 76.429339                                                     | 4599.65671                                                    |
| 0.054637681                                                  | 135.3789899                                                   | 12909.49854                                                   |
| 0.105029587                                                  | 52.240511                                                     | 3855.181044                                                   |
| 0.08691103                                                   | 59.54985651                                                   | 9363.231137                                                   |
| 0.12565041                                                   | 32.28872075                                                   | 5099                                                          |
| 0.127078308                                                  | 60.92857133                                                   | 6608.312781                                                   |

| log.sigma.3.0.mm.3D_gldm_SmallDependenceLowGrayLevelEmphasis | log.sigma.3.0.mm.3D_gldm_LowGrayLevelEmphasis | log.sigma.3.0.mm.3D_gldm_DistanceZoneVariabilityNormalized |
|--------------------------------------------------------------|-----------------------------------------------|------------------------------------------------------------|
| 0.001981056                                                  | 0.003863226                                   | 0.997647062                                                |
| 0.00423309                                                   | 0.01390057                                    | 1                                                          |
| 0.003510984                                                  | 0.010463457                                   | 1                                                          |
| 0.003186109                                                  | 0.006413912                                   | 1                                                          |
| 0.002664169                                                  | 0.00687515                                    | 1                                                          |
| 0.003723549                                                  | 0.011946509                                   | 1                                                          |
| 0.000937932                                                  | 0.003042623                                   | 1                                                          |
| 0.000761639                                                  | 0.002470766                                   | 0.998437501                                                |
| 0.000903718                                                  | 0.002543207                                   | 1                                                          |
| 0.001941001                                                  | 0.003671585                                   | 1                                                          |
| 0.00363435                                                   | 0.009839935                                   | 1                                                          |
| 0.001778684                                                  | 0.003934828                                   | 0.997142863                                                |
| 0.001520611                                                  | 0.004928236                                   | 1                                                          |
| 0.002051643                                                  | 0.003623925                                   | 1                                                          |
| 0.001812901                                                  | 0.00361645                                    | 1                                                          |
| 0.001447149                                                  | 0.004687805                                   | 1                                                          |
| 0.003190027                                                  | 0.008666272                                   | 1                                                          |
| 0.004944338                                                  | 0.014253644                                   | 1                                                          |
| 0.0028326                                                    | 0.010119742                                   | 1                                                          |
| 0.001299512                                                  | 0.003936888                                   | 0.998685076                                                |
| 0.001678872                                                  | 0.006968317                                   | 1                                                          |
| 0.004898908                                                  | 0.013694269                                   | 1                                                          |
| 0.003635723                                                  | 0.010389352                                   | 1                                                          |
| 0.00248552                                                   | 0.007812499                                   | 1                                                          |
| 0.003080006                                                  | 0.005269337                                   | 1                                                          |
| 0.001271287                                                  | 0.002740522                                   | 1                                                          |
| 0.002235389                                                  | 0.005377774                                   | 1                                                          |
| 0.001276518                                                  | 0.003523795                                   | 1                                                          |
| 0.005023263                                                  | 0.013275414                                   | 1                                                          |
| 0.003261691                                                  | 0.00717293                                    | 1                                                          |
| 0.001319261                                                  | 0.003436267                                   | 1                                                          |
| 0.00124614                                                   | 0.004856517                                   | 0.995454569                                                |
| 0.001629764                                                  | 0.004949754                                   | 0.996212135                                                |
| 0.00277221                                                   | 0.007636197                                   | 1                                                          |
| 0.001901251                                                  | 0.005509816                                   | 0.995614056                                                |
| 0.001059115                                                  | 0.00397885                                    | 1                                                          |
| 0.000725795                                                  | 0.002102481                                   | 1                                                          |
| 0.000711646                                                  | 0.002339385                                   | 0.995219151                                                |
| 0.003554118                                                  | 0.010889912                                   | 1                                                          |
| 0.001632844                                                  | 0.005467543                                   | 1                                                          |
| 0.001944296                                                  | 0.005668383                                   | 1                                                          |
| 0.001770983                                                  | 0.004416883                                   | 0.99492711                                                 |
| 0.001697767                                                  | 0.004344467                                   | 1                                                          |
| 0.001191137                                                  | 0.002769657                                   | 1                                                          |
| 0.003620713                                                  | 0.009216527                                   | 1                                                          |
| 0.001436197                                                  | 0.003658895                                   | 1                                                          |
| 0.001163091                                                  | 0.00380255                                    | 1                                                          |
| 0.004633762                                                  | 0.016888561                                   | 1                                                          |
| 0.004553348                                                  | 0.009941839                                   | 1                                                          |
| 0.00412986                                                   | 0.012292043                                   | 0.993442694                                                |
| 0.001629086                                                  | 0.004051558                                   | 1                                                          |
| 0.002025875                                                  | 0.005890501                                   | 0.998472117                                                |
| 0.002275035                                                  | 0.006722989                                   | 1                                                          |
| 0.006703622                                                  | 0.017043713                                   | 1                                                          |
| 0.002738635                                                  | 0.006976539                                   | 1                                                          |
| 0.001069425                                                  | 0.002527742                                   | 1                                                          |
| 0.001735602                                                  | 0.004358433                                   | 0.998502995                                                |
| 0.001346383                                                  | 0.003736494                                   | 1                                                          |
| 0.002617512                                                  | 0.006224945                                   | 1                                                          |
| 0.000814797                                                  | 0.002587838                                   | 0.996857824                                                |
| 0.001895869                                                  | 0.005516541                                   | 1                                                          |
| 0.001385443                                                  | 0.003621293                                   | 1                                                          |
| 0.001026303                                                  | 0.002853771                                   | 0.993510074                                                |
| 0.000687858                                                  | 0.002372418                                   | 0.993957759                                                |
| 0.003767373                                                  | 0.012173609                                   | 1                                                          |
| 0.001126974                                                  | 0.003145256                                   | 0.995642722                                                |
| 0.001935288                                                  | 0.005151374                                   | 1                                                          |
| 0.000704966                                                  | 0.002874154                                   | 0.997653962                                                |
| 0.001028386                                                  | 0.00267376                                    | 1                                                          |
| 0.002199442                                                  | 0.006354005                                   | 1                                                          |
| 0.002165531                                                  | 0.005807929                                   | 1                                                          |
| 0.001141964                                                  | 0.003158812                                   | 0.998106062                                                |
| 0.001371221                                                  | 0.003268749                                   | 1                                                          |
| 0.002725149                                                  | 0.006558706                                   | 0.997638728                                                |
| 0.002155719                                                  | 0.005876115                                   | 0.994704362                                                |
| 0.001936322                                                  | 0.00576074                                    | 1                                                          |
| 0.002200793                                                  | 0.00774158                                    | 1                                                          |
| 0.002881183                                                  | 0.008323065                                   | 1                                                          |
| 0.002944066                                                  | 0.008872483                                   | 0.995545679                                                |
| 0.0016839                                                    | 0.003663633                                   | 1                                                          |
| 0.001961521                                                  | 0.004442677                                   | 1                                                          |
| 0.004642361                                                  | 0.012096258                                   | 1                                                          |
| 0.001315987                                                  | 0.004604588                                   | 0.997624706                                                |
| 0.001542229                                                  | 0.007198749                                   | 1                                                          |
| 0.002420982                                                  | 0.00645208                                    | 0.997515532                                                |
| 0.001385203                                                  | 0.006115602                                   | 1                                                          |
| 0.00217326                                                   | 0.004748151                                   | 1                                                          |
| 0.003125049                                                  | 0.008007087                                   | 1                                                          |
| 0.00307709                                                   | 0.007378749                                   | 1                                                          |
| 0.002117058                                                  | 0.004691524                                   | 1                                                          |
| 0.003073142                                                  | 0.014384497                                   | 1                                                          |
| 0.002595002                                                  | 0.006397765                                   | 0.995327128                                                |
| 0.001432998                                                  | 0.003640077                                   | 0.9949875                                                  |
| 0.001507768                                                  | 0.003827055                                   | 1                                                          |
| 0.001790941                                                  | 0.004964757                                   | 0.998552823                                                |
| 0.001216506                                                  | 0.002857749                                   | 0.995955527                                                |
| 0.002420477                                                  | 0.007812876                                   | 1                                                          |
| 0.002621291                                                  | 0.00580197                                    | 1                                                          |
| 0.003023012                                                  | 0.007717478                                   | 1                                                          |
| 0.00129943                                                   | 0.004820745                                   | 0.99850075                                                 |

| log.sigma.3.0.mm.3D_gldzm_LowIntensityEmphasis | log.sigma.3.0.mm.3D_gldzm_LargeDistanceEmphasis | log.sigma.3.0.mm.3D_gldzm_HighIntensitySmallDistanceEmphasis |
|------------------------------------------------|-------------------------------------------------|--------------------------------------------------------------|
| 0.005718237                                    | 1.003533569                                     | 533.2653121                                                  |
| 0.023723705                                    | 1                                               | 155.352657                                                   |
| 0.016687761                                    | 1                                               | 184.0733696                                                  |
| 0.01013072                                     | 1                                               | 328.26                                                       |
| 0.011413346                                    | 1                                               | 273.4545455                                                  |
| 0.01577888                                     | 1                                               | 214.6201923                                                  |
| 0.003871302                                    | 1                                               | 446.2627119                                                  |
| 0.003383017                                    | 1.002345582                                     | 545.289484                                                   |
| 0.003412482                                    | 1                                               | 508.1696882                                                  |
| 0.006464375                                    | 1                                               | 488.5843023                                                  |
| 0.014845215                                    | 1                                               | 160.713948                                                   |
| 0.006409065                                    | 1.004291845                                     | 404.9685265                                                  |
| 0.009855654                                    | 1                                               | 316.310559                                                   |
| 0.007514153                                    | 1                                               | 576.3426854                                                  |
| 0.00580584                                     | 1                                               | 424.4164223                                                  |
| 0.006339179                                    | 1                                               | 350.5389718                                                  |
| 0.01350644                                     | 1                                               | 238.2050562                                                  |
| 0.027493923                                    | 1                                               | 136.8252033                                                  |
| 0.014427669                                    | 1                                               | 145.2307692                                                  |
| 0.005123725                                    | 1.001973684                                     | 376.0177632                                                  |
| 0.011167386                                    | 1                                               | 213.7803922                                                  |
| 0.022393583                                    | 1                                               | 134.7715356                                                  |
| 0.015027221                                    | 1                                               | 192.0145455                                                  |
| 0.011227906                                    | 1                                               | 215.1908078                                                  |
| 0.011214927                                    | 1                                               | 409.9505495                                                  |
| 0.003968675                                    | 1                                               | 595.2188235                                                  |
| 0.008317969                                    | 1                                               | 403.9703557                                                  |
| 0.005262179                                    | 1                                               | 394.5443709                                                  |
| 0.022446449                                    | 1                                               | 142.6203704                                                  |
| 0.015936532                                    | 1                                               | 231.6772727                                                  |
| 0.005481656                                    | 1                                               | 437.0746988                                                  |
| 0.008200388                                    | 1.006833713                                     | 316.5267654                                                  |
| 0.006385998                                    | 1.0056926                                       | 382.7459677                                                  |
| 0.012087678                                    | 1                                               | 360.5550787                                                  |
| 0.007333106                                    | 1.006593407                                     | 313.089011                                                   |
| 0.005615655                                    | 1                                               | 399.6619916                                                  |
| 0.003600285                                    | 1                                               | 617.4189526                                                  |
| 0.003273116                                    | 1.007188498                                     | 596.9876198                                                  |
| 0.021753892                                    | 1                                               | 137.3539095                                                  |
| 0.006219424                                    | 1                                               | 298.2145661                                                  |
| 0.008778639                                    | 1                                               | 297.5619335                                                  |
| 0.005105447                                    | 1.007628735                                     | 363.2603306                                                  |
| 0.006319337                                    | 1                                               | 355.6044643                                                  |
| 0.004162301                                    | 1                                               | 485.6457286                                                  |
| 0.015145083                                    | 1                                               | 204.7401813                                                  |
| 0.004958326                                    | 1                                               | 418.5422773                                                  |
| 0.005107973                                    | 1                                               | 409.9928344                                                  |
| 0.027633175                                    | 1                                               | 121.0163934                                                  |
| 0.016411718                                    | 1                                               | 206.010989                                                   |
| 0.020402948                                    | 1.009868421                                     | 170.4572368                                                  |
| 0.006042978                                    | 1                                               | 420.4040404                                                  |
| 0.006780009                                    | 1.002293578                                     | 311.1095183                                                  |
| 0.009331475                                    | 1                                               | 228.7179487                                                  |
| 0.025908003                                    | 1                                               | 155.1891892                                                  |
| 0.009934831                                    | 1                                               | 247.5434783                                                  |
| 0.004547221                                    | 1                                               | 560.8487903                                                  |
| 0.006022947                                    | 1.002247191                                     | 351.8878277                                                  |
| 0.006074845                                    | 1                                               | 407.6862069                                                  |
| 0.010408171                                    | 1                                               | 263.3135593                                                  |
| 0.003365744                                    | 1.004720692                                     | 504.0108183                                                  |
| 0.008311463                                    | 1                                               | 288.1183036                                                  |
| 0.005311937                                    | 1                                               | 389.1105332                                                  |
| 0.003710463                                    | 1.009766685                                     | 488.2788931                                                  |
| 0.002988202                                    | 1.009090909                                     | 557.4412879                                                  |
| 0.017644905                                    | 1                                               | 155.8410256                                                  |
| 0.005317516                                    | 1.006550218                                     | 498.6091703                                                  |
| 0.011434705                                    | 1                                               | 287.9755102                                                  |
| 0.003393697                                    | 1.003523194                                     | 504.9729888                                                  |
| 0.00368486                                     | 1                                               | 467.6630197                                                  |
| 0.011046464                                    | 1                                               | 231.4333868                                                  |
| 0.009522351                                    | 1                                               | 309.4845938                                                  |
| 0.004983718                                    | 1.002843602                                     | 459.6170616                                                  |
| 0.005640215                                    | 1                                               | 498.4510433                                                  |
| 0.009368091                                    | 1.003546099                                     | 338.0591017                                                  |
| 0.007106016                                    | 1.007964602                                     | 296.4904867                                                  |
| 0.010025465                                    | 1                                               | 303.5654762                                                  |
| 0.010896016                                    | 1                                               | 198.6097561                                                  |
| 0.014891646                                    | 1                                               | 227.8238095                                                  |
| 0.013793514                                    | 1.006696429                                     | 210.9866071                                                  |
| 0.005171478                                    | 1                                               | 461.1349481                                                  |
| 0.006005063                                    | 1                                               | 498.5126904                                                  |
| 0.018864794                                    | 1                                               | 198.6124314                                                  |
| 0.006529878                                    | 1.003567182                                     | 387.68044                                                    |
| 0.009710113                                    | 1                                               | 212.3143297                                                  |
| 0.008817377                                    | 1.003731343                                     | 288.5314055                                                  |
| 0.011484283                                    | 1                                               | 224.0247525                                                  |
| 0.007708732                                    | 1                                               | 372.2260184                                                  |
| 0.012837331                                    | 1                                               | 249.7214854                                                  |
| 0.013166759                                    | 1                                               | 245.8376963                                                  |
| 0.009601443                                    | 1                                               | 348.7142857                                                  |
| 0.01826565                                     | 1                                               | 140.5021834                                                  |
| 0.008371439                                    | 1.007025761                                     | 269.7450234                                                  |
| 0.005351257                                    | 1.007537688                                     | 398.4558731                                                  |
| 0.005905094                                    | 1                                               | 376.4526882                                                  |
| 0.006702283                                    | 1.002172339                                     | 285.3606083                                                  |
| 0.004628446                                    | 1.006079027                                     | 532.164387                                                   |
| 0.010700532                                    | 1                                               | 225.161039                                                   |
| 0.01282945                                     | 1                                               | 295.9446809                                                  |
| 0.015421709                                    | 1                                               | 175.0502793                                                  |
| 0.006248872                                    | 1.002250563                                     | 302.2865716                                                  |

| log.sigma.3.0.mm.3D_gldzm_LowIntensityLargeDistanceEmphasis | log.sigma.3.0.mm.3D_gldzm_HighIntensityEmphasis | log.sigma.3.0.mm.3D_gldzm_DistanceZoneVariability | log.sigma.3.0.mm.3D_gldzm_ZonePercentage |
|-------------------------------------------------------------|-------------------------------------------------|---------------------------------------------------|------------------------------------------|
| 0.005733942                                                 | 533.4640754                                     | 847.0023557                                       | 0.400094251                              |
| 0.023723705                                                 | 155.352657                                      | 207                                               | 0.221390374                              |
| 0.016687761                                                 | 184.0733696                                     | 368                                               | 0.239895698                              |
| 0.01013072                                                  | 328.26                                          | 350                                               | 0.358239509                              |
| 0.011413346                                                 | 273.4545455                                     | 660                                               | 0.278716216                              |
| 0.01577888                                                  | 214.6201923                                     | 208                                               | 0.315151515                              |
| 0.003871302                                                 | 446.2627119                                     | 1534                                              | 0.271456379                              |
| 0.00338677                                                  | 545.6559812                                     | 1277.001564                                       | 0.250391543                              |
| 0.003412482                                                 | 508.1696882                                     | 1379                                              | 0.303343599                              |
| 0.006464375                                                 | 488.5843023                                     | 344                                               | 0.320895522                              |
| 0.014845215                                                 | 160.713948                                      | 423                                               | 0.280503979                              |
| 0.006438869                                                 | 405.1230329                                     | 697.0028612                                       | 0.303253796                              |
| 0.009855654                                                 | 316.310559                                      | 322                                               | 0.172469202                              |
| 0.007514153                                                 | 576.3426854                                     | 499                                               | 0.29062318                               |
| 0.00580584                                                  | 424.4164223                                     | 682                                               | 0.34375                                  |
| 0.006339179                                                 | 350.5389718                                     | 1206                                              | 0.27559415                               |
| 0.01350644                                                  | 238.2050562                                     | 356                                               | 0.298157454                              |
| 0.027493923                                                 | 136.8252033                                     | 246                                               | 0.199513382                              |
| 0.014427669                                                 | 145.2307692                                     | 286                                               | 0.220338983                              |
| 0.005143461                                                 | 376.0671053                                     | 1518.001316                                       | 0.292363916                              |
| 0.011167386                                                 | 213.7803922                                     | 510                                               | 0.168650794                              |
| 0.022393583                                                 | 134.7715356                                     | 267                                               | 0.247451344                              |
| 0.015027221                                                 | 192.0145455                                     | 275                                               | 0.268554688                              |
| 0.011227906                                                 | 215.1908078                                     | 718                                               | 0.271250472                              |
| 0.011214927                                                 | 409.9505495                                     | 364                                               | 0.285938727                              |
| 0.003968675                                                 | 595.2188235                                     | 850                                               | 0.358801182                              |
| 0.008317969                                                 | 403.9703557                                     | 1012                                              | 0.313021961                              |
| 0.005262179                                                 | 394.5443709                                     | 755                                               | 0.273352643                              |
| 0.022446449                                                 | 142.6203704                                     | 108                                               | 0.241610738                              |
| 0.015936532                                                 | 231.6772727                                     | 440                                               | 0.214216164                              |
| 0.005481656                                                 | 437.0746988                                     | 1245                                              | 0.261664565                              |
| 0.00823076                                                  | 316.9111617                                     | 437.0045558                                       | 0.212179797                              |
| 0.006730717                                                 | 382.8235294                                     | 1050.00759                                        | 0.326416847                              |
| 0.012087678                                                 | 360.5550787                                     | 699                                               | 0.297446809                              |
| 0.007360176                                                 | 313.5186813                                     | 1359.013187                                       | 0.309945504                              |
| 0.005615655                                                 | 399.6619916                                     | 713                                               | 0.237745915                              |
| 0.003600285                                                 | 617.4189526                                     | 802                                               | 0.215533459                              |
| 0.003285024                                                 | 598.0838658                                     | 1246.014377                                       | 0.242588646                              |
| 0.021753892                                                 | 137.3539095                                     | 243                                               | 0.197560976                              |
| 0.006219424                                                 | 298.2145661                                     | 2293                                              | 0.315405777                              |
| 0.008778639                                                 | 297.5619335                                     | 662                                               | 0.255204318                              |
| 0.005136668                                                 | 363.7552448                                     | 1565.020343                                       | 0.406775278                              |
| 0.006319337                                                 | 355.6044643                                     | 1120                                              | 0.306597317                              |
| 0.004162301                                                 | 485.6457286                                     | 796                                               | 0.319935691                              |
| 0.015145083                                                 | 204.7401813                                     | 331                                               | 0.258998435                              |
| 0.004958326                                                 | 418.5422773                                     | 887                                               | 0.323132969                              |
| 0.005107973                                                 | 409.9928344                                     | 1256                                              | 0.275317843                              |
| 0.027633175                                                 | 121.0163934                                     | 183                                               | 0.21010333                               |
| 0.016411718                                                 | 206.010989                                      | 273                                               | 0.32078906                               |
| 0.020557142                                                 | 170.6151316                                     | 302.0065789                                       | 0.224852071                              |
| 0.006042978                                                 | 420.4040404                                     | 792                                               | 0.308291164                              |
| 0.006787945                                                 | 311.2752294                                     | 1306.001529                                       | 0.388015426                              |
| 0.009331475                                                 | 228.7179487                                     | 1287                                              | 0.285239362                              |
| 0.025908003                                                 | 155.1891892                                     | 333                                               | 0.301630435                              |
| 0.009934831                                                 | 247.5434783                                     | 414                                               | 0.311278195                              |
| 0.004547221                                                 | 560.8487903                                     | 496                                               | 0.254358974                              |
| 0.006041519                                                 | 351.9558052                                     | 1333.001498                                       | 0.330037083                              |
| 0.006074845                                                 | 407.6862069                                     | 870                                               | 0.251590515                              |
| 0.010408171                                                 | 263.3135593                                     | 472                                               | 0.286407767                              |
| 0.00338134                                                  | 504.4834776                                     | 2534.012589                                       | 0.278453281                              |
| 0.008311463                                                 | 288.1183036                                     | 448                                               | 0.253680634                              |
| 0.005311937                                                 | 389.1105332                                     | 769                                               | 0.288014981                              |
| 0.004008318                                                 | 488.9918611                                     | 1831.039067                                       | 0.318362411                              |
| 0.003025414                                                 | 558.05                                          | 1968.036364                                       | 0.25974026                               |
| 0.017644905                                                 | 155.8410256                                     | 195                                               | 0.246835443                              |
| 0.005350369                                                 | 498.9923581                                     | 912.0087336                                       | 0.237182807                              |
| 0.011434705                                                 | 287.9755102                                     | 245                                               | 0.187883436                              |
| 0.003400707                                                 | 505.4468585                                     | 1699.004698                                       | 0.27248                                  |
| 0.00368486                                                  | 467.6630197                                     | 1828                                              | 0.312105173                              |
| 0.011046464                                                 | 231.4333868                                     | 623                                               | 0.214975845                              |
| 0.009522351                                                 | 309.4845938                                     | 357                                               | 0.27482679                               |
| 0.005003465                                                 | 459.7194313                                     | 1053.001896                                       | 0.245920746                              |
| 0.005640215                                                 | 498.4510433                                     | 623                                               | 0.273365511                              |
| 0.009392717                                                 | 338.1867612                                     | 844.0023641                                       | 0.374501992                              |
| 0.007143017                                                 | 297.0672566                                     | 1124.015929                                       | 0.360907058                              |
| 0.010025465                                                 | 303.5654762                                     | 336                                               | 0.250372578                              |
| 0.010896016                                                 | 198.6097561                                     | 533                                               | 0.22245409                               |
| 0.014891646                                                 | 227.8238095                                     | 210                                               | 0.219206681                              |
| 0.013840017                                                 | 211.2276786                                     | 446.0044643                                       | 0.26244874                               |
| 0.005171478                                                 | 461.1349481                                     | 867                                               | 0.370671227                              |
| 0.006005063                                                 | 498.5126904                                     | 788                                               | 0.396178984                              |
| 0.018864794                                                 | 198.6124314                                     | 547                                               | 0.30405781                               |
| 0.006542222                                                 | 387.9381688                                     | 839.0023781                                       | 0.257265219                              |
| 0.009710113                                                 | 212.3143297                                     | 649                                               | 0.211194273                              |
| 0.008824431                                                 | 289.0248756                                     | 802.0024876                                       | 0.329643296                              |
| 0.011484283                                                 | 224.0247525                                     | 202                                               | 0.131853786                              |
| 0.007708732                                                 | 372.2260184                                     | 761                                               | 0.319077568                              |
| 0.012837331                                                 | 249.7214854                                     | 754                                               | 0.274981765                              |
| 0.013166759                                                 | 245.8376963                                     | 382                                               | 0.260928962                              |
| 0.009601443                                                 | 348.7142857                                     | 483                                               | 0.238518519                              |
| 0.01826565                                                  | 140.5021834                                     | 229                                               | 0.175613497                              |
| 0.008409253                                                 | 270.2025761                                     | 850.0093677                                       | 0.35852225                               |
| 0.005405634                                                 | 399.0640704                                     | 1584.020101                                       | 0.307158017                              |
| 0.005905094                                                 | 376.4526882                                     | 930                                               | 0.281818182                              |
| 0.006762626                                                 | 285.3801593                                     | 1379.001448                                       | 0.317325368                              |
| 0.004643573                                                 | 532.8125633                                     | 983.0081054                                       | 0.28842782                               |
| 0.010700532                                                 | 225.161039                                      | 770                                               | 0.273340433                              |
| 0.01282945                                                  | 295.9446809                                     | 235                                               | 0.224450812                              |
| 0.015421709                                                 | 175.0502793                                     | 179                                               | 0.214628297                              |
| 0.006264501                                                 | 302.3675919                                     | 1331.0015                                         | 0.230862487                              |

| log.sigma.3.0.mm.3D_gldzm_IntensityVariabilityNormalized | log.sigma.3.0.mm.3D_gldzm_LowIntensitySmallDistanceEmphasis | log.sigma.3.0.mm.3D_gldzm_IntensityVariability |
|----------------------------------------------------------|-------------------------------------------------------------|------------------------------------------------|
| 0.043891449                                              | 0.005714311                                                 | 37.26383981                                    |
| 0.0664893                                                | 0.023723705                                                 | 13.76328502                                    |
| 0.058276229                                              | 0.016687761                                                 | 21.44565217                                    |
| 0.051493878                                              | 0.01013072                                                  | 18.02285714                                    |
| 0.057203857                                              | 0.011413346                                                 | 37.75454545                                    |
| 0.054086538                                              | 0.01577888                                                  | 11.25                                          |
| 0.054944084                                              | 0.003871302                                                 | 84.28422425                                    |
| 0.049894213                                              | 0.003382079                                                 | 63.81468988                                    |
| 0.054842633                                              | 0.003412482                                                 | 75.6279913                                     |
| 0.0542692                                                | 0.006464375                                                 | 18.66860465                                    |
| 0.070603424                                              | 0.014845215                                                 | 29.86524823                                    |
| 0.051004808                                              | 0.006401614                                                 | 35.65236052                                    |
| 0.054492496                                              | 0.009855654                                                 | 17.54658385                                    |
| 0.046911458                                              | 0.007514153                                                 | 23.40881764                                    |
| 0.047884005                                              | 0.00580584                                                  | 32.6568915                                     |
| 0.053546529                                              | 0.006339179                                                 | 64.57711443                                    |
| 0.059020326                                              | 0.01350644                                                  | 21.01123596                                    |
| 0.062793311                                              | 0.027493923                                                 | 15.44715447                                    |
| 0.078243435                                              | 0.014427669                                                 | 22.37762238                                    |
| 0.052423823                                              | 0.00511879                                                  | 79.68421053                                    |
| 0.062775855                                              | 0.011167386                                                 | 32.01568627                                    |
| 0.070712172                                              | 0.022393583                                                 | 18.88014981                                    |
| 0.060495868                                              | 0.015027221                                                 | 16.63636364                                    |
| 0.061777919                                              | 0.011227906                                                 | 44.35654596                                    |
| 0.054009178                                              | 0.011214927                                                 | 19.65934066                                    |
| 0.045948789                                              | 0.003968675                                                 | 39.05647059                                    |
| 0.046337234                                              | 0.008317969                                                 | 46.89328063                                    |
| 0.053038025                                              | 0.005262179                                                 | 40.04370861                                    |
| 0.082475995                                              | 0.022446449                                                 | 8.907407407                                    |
| 0.061115702                                              | 0.015936532                                                 | 26.89090909                                    |
| 0.053421719                                              | 0.005481656                                                 | 66.51004016                                    |
| 0.062406276                                              | 0.008192795                                                 | 27.39635535                                    |
| 0.047396923                                              | 0.006299818                                                 | 49.95635674                                    |
| 0.05034169                                               | 0.012087678                                                 | 35.1888412                                     |
| 0.055921856                                              | 0.007326339                                                 | 76.33333333                                    |
| 0.056838635                                              | 0.005615655                                                 | 40.5259467                                     |
| 0.049601682                                              | 0.003600285                                                 | 39.78054863                                    |
| 0.047263675                                              | 0.003270139                                                 | 59.17412141                                    |
| 0.084421413                                              | 0.021753892                                                 | 20.51440329                                    |
| 0.051900502                                              | 0.006219424                                                 | 119.00785                                      |
| 0.052404597                                              | 0.008778639                                                 | 34.6918429                                     |
| 0.050558758                                              | 0.005097642                                                 | 79.52892562                                    |
| 0.054139031                                              | 0.006319337                                                 | 60.63571429                                    |
| 0.053035277                                              | 0.004162301                                                 | 42.2160804                                     |
| 0.055631111                                              | 0.015145083                                                 | 18.41389728                                    |
| 0.051914857                                              | 0.004958326                                                 | 46.04847802                                    |
| 0.051662846                                              | 0.005107973                                                 | 64.88853503                                    |
| 0.069545224                                              | 0.027633175                                                 | 12.7267596                                     |
| 0.056689342                                              | 0.016411718                                                 | 15.47619048                                    |
| 0.064599204                                              | 0.0203644                                                   | 19.63815789                                    |
| 0.050804765                                              | 0.006042978                                                 | 40.23737374                                    |
| 0.052730083                                              | 0.006778025                                                 | 68.97094801                                    |
| 0.060112813                                              | 0.009331475                                                 | 77.36519037                                    |
| 0.060592124                                              | 0.025908003                                                 | 20.17717718                                    |
| 0.05875283                                               | 0.009934831                                                 | 24.3236715                                     |
| 0.056207726                                              | 0.004547221                                                 | 27.87903226                                    |
| 0.05178078                                               | 0.006018304                                                 | 69.12734082                                    |
| 0.051885322                                              | 0.006074845                                                 | 45.14022989                                    |
| 0.056251795                                              | 0.010408171                                                 | 26.55084746                                    |
| 0.053591867                                              | 0.003361844                                                 | 136.2305271                                    |
| 0.052236129                                              | 0.008311463                                                 | 23.40178571                                    |
| 0.059082354                                              | 0.005311937                                                 | 45.4343303                                     |
| 0.054790177                                              | 0.003635999                                                 | 100.9782963                                    |
| 0.051298847                                              | 0.002978899                                                 | 101.5717172                                    |
| 0.065825115                                              | 0.017644905                                                 | 12.83589744                                    |
| 0.05143876                                               | 0.005309303                                                 | 47.11790393                                    |
| 0.065589338                                              | 0.011434705                                                 | 16.06938776                                    |
| 0.050129835                                              | 0.003391945                                                 | 85.37110981                                    |
| 0.053404613                                              | 0.00368486                                                  | 97.62363239                                    |
| 0.063146531                                              | 0.011046464                                                 | 39.34028892                                    |
| 0.058776452                                              | 0.009522351                                                 | 20.98319328                                    |
| 0.050041104                                              | 0.004978781                                                 | 52.79336493                                    |
| 0.050114781                                              | 0.005640215                                                 | 31.22150883                                    |
| 0.046001487                                              | 0.009361934                                                 | 38.91725768                                    |
| 0.051659488                                              | 0.007096766                                                 | 58.37522124                                    |
| 0.06079932                                               | 0.010025465                                                 | 20.42857143                                    |
| 0.064236912                                              | 0.010896016                                                 | 34.23827392                                    |
| 0.053197279                                              | 0.014891646                                                 | 11.17142857                                    |
| 0.062340561                                              | 0.013781889                                                 | 27.92857143                                    |
| 0.049010961                                              | 0.005171478                                                 | 42.49250288                                    |
| 0.045186039                                              | 0.006005063                                                 | 35.60659898                                    |
| 0.053564565                                              | 0.018864794                                                 | 29.29981718                                    |
| 0.052973288                                              | 0.006526793                                                 | 44.55053508                                    |
| 0.065842674                                              | 0.009710113                                                 | 42.73189522                                    |
| 0.053371204                                              | 0.008815614                                                 | 42.91044776                                    |
| 0.07562984                                               | 0.011484283                                                 | 15.27722772                                    |
| 0.047753406                                              | 0.007708732                                                 | 36.34034166                                    |
| 0.055727543                                              | 0.012837331                                                 | 42.01856764                                    |
| 0.06184041                                               | 0.013166759                                                 | 23.62303665                                    |
| 0.055214777                                              | 0.009601443                                                 | 26.66873706                                    |
| 0.077019889                                              | 0.01826565                                                  | 17.63755459                                    |
| 0.056705187                                              | 0.008361986                                                 | 48.42622951                                    |
| 0.051179263                                              | 0.005337662                                                 | 81.47738693                                    |
| 0.054861834                                              | 0.005905094                                                 | 51.02150538                                    |
| 0.05975636                                               | 0.006687197                                                 | 82.52353367                                    |
| 0.046662335                                              | 0.004624664                                                 | 46.05572442                                    |
| 0.055260584                                              | 0.010700532                                                 | 42.55064935                                    |
| 0.056767768                                              | 0.01282945                                                  | 13.34042553                                    |
| 0.073874099                                              | 0.015421709                                                 | 13.22346369                                    |
| 0.058245056                                              | 0.006244965                                                 | 77.64066017                                    |

| log.sigma.3.0.mm.3D_gldzm_HighIntensityLargeDistanceEmphasis | log.sigma.3.0.mm.3D_gldzm_SmallDistanceEmphasis | log.sigma.3.0.mm.3D_glcm_SumVariance | log.sigma.3.0.mm.3D_glcm_Homogeneity1 |
|--------------------------------------------------------------|-------------------------------------------------|--------------------------------------|---------------------------------------|
| 534.2591284                                                  | 0.999116608                                     | 1752.791121                          | 0.337312736                           |
| 155.352657                                                   | 1                                               | 354.272343                           | 0.46273078                            |
| 184.0733696                                                  | 1                                               | 453.0894506                          | 0.455920267                           |
| 328.26                                                       | 1                                               | 1021.686376                          | 0.368842364                           |
| 273.4545455                                                  | 1                                               | 831.5008215                          | 0.408598346                           |
| 214.6201923                                                  | 1                                               | 521.581607                           | 0.383888539                           |
| 446.2627119                                                  | 1                                               | 1284.084863                          | 0.416218564                           |
| 547.1219703                                                  | 0.999413604                                     | 1622.22025                           | 0.422239051                           |
| 508.1696882                                                  | 1                                               | 1631.372291                          | 0.392408827                           |
| 488.5843023                                                  | 1                                               | 1533.550652                          | 0.393606973                           |
| 160.713948                                                   | 1                                               | 467.9334625                          | 0.429927008                           |
| 405.7410587                                                  | 0.998927039                                     | 1233.961416                          | 0.394341245                           |
| 316.310559                                                   | 1                                               | 938.4583642                          | 0.508241509                           |
| 576.3426854                                                  | 1                                               | 1877.286194                          | 0.395166364                           |
| 424.4164223                                                  | 1                                               | 1405.441561                          | 0.371409001                           |
| 350.5389718                                                  | 1                                               | 1000.251911                          | 0.407742597                           |
| 238.2050562                                                  | 1                                               | 730.9367715                          | 0.391227339                           |
| 136.8252033                                                  | 1                                               | 334.1467532                          | 0.466203969                           |
| 145.2307692                                                  | 1                                               | 377.879677                           | 0.46341599                            |
| 376.2644737                                                  | 0.999506579                                     | 1053.466845                          | 0.399800967                           |
| 213.7803922                                                  | 1                                               | 559.4065025                          | 0.503185527                           |
| 134.7715356                                                  | 1                                               | 340.0708712                          | 0.422656618                           |
| 192.0145455                                                  | 1                                               | 485.1807524                          | 0.435907969                           |
| 215.1908078                                                  | 1                                               | 598.1865458                          | 0.428368631                           |
| 409.9505495                                                  | 1                                               | 1217.494407                          | 0.402161089                           |
| 595.2188235                                                  | 1                                               | 1814.188605                          | 0.367604011                           |
| 403.9703557                                                  | 1                                               | 1159.375311                          | 0.382811355                           |
| 394.5443709                                                  | 1                                               | 1218.822068                          | 0.4100546                             |
| 142.6203704                                                  | 1                                               | 332.5844195                          | 0.430220661                           |
| 231.6772727                                                  | 1                                               | 675.6203048                          | 0.456546295                           |
| 437.0746988                                                  | 1                                               | 1301.110041                          | 0.418728916                           |
| 318.4487472                                                  | 0.998291572                                     | 1110.793392                          | 0.445485718                           |
| 383.1337761                                                  | 0.99857685                                      | 1172.259182                          | 0.372717531                           |
| 360.5550787                                                  | 1                                               | 1130.923682                          | 0.398308984                           |
| 315.2373626                                                  | 0.998351648                                     | 874.7229059                          | 0.393705786                           |
| 399.6619916                                                  | 1                                               | 1179.696903                          | 0.438512568                           |
| 617.4189526                                                  | 1                                               | 2088.255329                          | 0.452883714                           |
| 602.4688498                                                  | 0.998202875                                     | 1828.932116                          | 0.455355022                           |
| 137.3539095                                                  | 1                                               | 433.5978995                          | 0.458377012                           |
| 298.2145661                                                  | 1                                               | 829.9504938                          | 0.37463426                            |
| 297.5619335                                                  | 1                                               | 1008.008891                          | 0.425620871                           |
| 365.7349015                                                  | 0.998092816                                     | 1038.115983                          | 0.33031161                            |
| 355.6044643                                                  | 1                                               | 1091.344455                          | 0.378421006                           |
| 485.6457286                                                  | 1                                               | 1631.336933                          | 0.382074142                           |
| 204.7401813                                                  | 1                                               | 501.5748457                          | 0.422493545                           |
| 418.5422773                                                  | 1                                               | 1245.448636                          | 0.393503398                           |
| 409.9928344                                                  | 1                                               | 1168.298708                          | 0.409323351                           |
| 121.0163934                                                  | 1                                               | 265.2149533                          | 0.483336186                           |
| 206.010989                                                   | 1                                               | 573.4542589                          | 0.3899534                             |
| 171.2467105                                                  | 0.997532895                                     | 371.4421318                          | 0.475445357                           |
| 420.4040404                                                  | 1                                               | 1286.13925                           | 0.372097384                           |
| 311.9380734                                                  | 0.999426606                                     | 899.6186219                          | 0.345094071                           |
| 228.7179487                                                  | 1                                               | 652.1499112                          | 0.409068899                           |
| 155.1891892                                                  | 1                                               | 358.4755261                          | 0.396541246                           |
| 247.5434783                                                  | 1                                               | 671.2529644                          | 0.394074615                           |
| 560.8487903                                                  | 1                                               | 1840.643364                          | 0.417479527                           |
| 352.2277154                                                  | 0.999438202                                     | 1066.569159                          | 0.373600696                           |
| 407.6862069                                                  | 1                                               | 1314.217985                          | 0.418550301                           |
| 263.3135593                                                  | 1                                               | 810.8684942                          | 0.403114956                           |
| 506.3741149                                                  | 0.998819827                                     | 1586.755303                          | 0.410441623                           |
| 288.1183036                                                  | 1                                               | 769.854906                           | 0.458839587                           |
| 389.1105332                                                  | 1                                               | 1189.066262                          | 0.408450956                           |
| 491.843733                                                   | 0.997558329                                     | 1499.410258                          | 0.397079888                           |
| 560.4848485                                                  | 0.997727273                                     | 1632.791094                          | 0.415470059                           |
| 155.8410256                                                  | 1                                               | 362.145254                           | 0.430280006                           |
| 500.5251092                                                  | 0.998362445                                     | 1464.422314                          | 0.445068504                           |
| 287.9755102                                                  | 1                                               | 1001.936952                          | 0.486245724                           |
| 507.3423371                                                  | 0.999119201                                     | 1594.302795                          | 0.408211255                           |
| 467.6630197                                                  | 1                                               | 1603.450672                          | 0.41100399                            |
| 231.4333868                                                  | 1                                               | 656.1382666                          | 0.471060903                           |
| 309.4845938                                                  | 1                                               | 969.5478364                          | 0.407157699                           |
| 460.112891                                                   | 0.9992891                                       | 1358.960202                          | 0.424337983                           |
| 498.4510433                                                  | 1                                               | 1575.846805                          | 0.408729972                           |
| 338.6973995                                                  | 0.999113475                                     | 1106.142054                          | 0.342355745                           |
| 299.3743363                                                  | 0.99800885                                      | 810.6600251                          | 0.358591787                           |
| 303.5654762                                                  | 1                                               | 1060.649773                          | 0.432218076                           |
| 198.6097561                                                  | 1                                               | 505.4974077                          | 0.47346056                            |
| 227.8238095                                                  | 1                                               | 573.3544457                          | 0.455036336                           |
| 212.1919643                                                  | 0.998325893                                     | 555.7491238                          | 0.433736254                           |
| 461.1349481                                                  | 1                                               | 1495.071955                          | 0.350481118                           |
| 498.5126904                                                  | 1                                               | 1593.060892                          | 0.344513124                           |
| 198.6124314                                                  | 1                                               | 534.4901234                          | 0.415554614                           |
| 388.9690844                                                  | 0.999108205                                     | 1174.716161                          | 0.417909242                           |
| 212.3143297                                                  | 1                                               | 627.7119964                          | 0.444441482                           |
| 290.9987562                                                  | 0.999067164                                     | 872.6037738                          | 0.370419485                           |
| 224.0247525                                                  | 1                                               | 625.745374                           | 0.520897652                           |
| 372.2260184                                                  | 1                                               | 1221.367911                          | 0.386533445                           |
| 249.7214854                                                  | 1                                               | 667.8627496                          | 0.42868295                            |
| 245.8376963                                                  | 1                                               | 687.5048791                          | 0.442412218                           |
| 348.7142857                                                  | 1                                               | 1123.589372                          | 0.445761599                           |
| 140.5021834                                                  | 1                                               | 269.403963                           | 0.515692884                           |
| 272.0327869                                                  | 0.99824356                                      | 794.8624245                          | 0.371192911                           |
| 401.4968593                                                  | 0.998115578                                     | 1259.79014                           | 0.384753314                           |
| 376.4526882                                                  | 1                                               | 1175.855208                          | 0.413593385                           |
| 285.4583635                                                  | 0.999456915                                     | 889.1841882                          | 0.386508355                           |
| 535.4052685                                                  | 0.998480243                                     | 1695.312282                          | 0.421397361                           |
| 225.161039                                                   | 1                                               | 600.1948277                          | 0.414087641                           |
| 295.9446809                                                  | 1                                               | 1049.211164                          | 0.453647323                           |
| 175.0502793                                                  | 1                                               | 568.8543304                          | 0.465661232                           |
| 302.6916729                                                  | 0.999437359                                     | 817.2599993                          | 0.447918015                           |

| log.sigma.3.0.mm.3D_glc_m_Homogeneity2 | log.sigma.3.0.mm.3D_glc_m_ClusterShade | log.sigma.3.0.mm.3D_glc_m_MaximumProbability | log.sigma.3.0.mm.3D_glc_m_Iidmn | log.sigma.3.0.mm.3D_glc_m_SumVariance2 |
|----------------------------------------|----------------------------------------|----------------------------------------------|---------------------------------|----------------------------------------|
| 0.252683069                            | -758.7547487                           | 0.021819447                                  | 0.978628696                     | 98.17933459                            |
| 0.394574608                            | 103.8929924                            | 0.053004609                                  | 0.983955859                     | 29.90848442                            |
| 0.385657524                            | 79.45051266                            | 0.036209959                                  | 0.986638722                     | 41.03584269                            |
| 0.286593665                            | -295.5236973                           | 0.022347926                                  | 0.979738054                     | 74.09906919                            |
| 0.330011329                            | -88.14382385                           | 0.032826393                                  | 0.982721693                     | 47.17372648                            |
| 0.299870937                            | 336.87955                              | 0.027828737                                  | 0.981462887                     | 67.61127191                            |
| 0.337720151                            | 112.9750592                            | 0.037984696                                  | 0.992415559                     | 50.2314444                             |
| 0.345939326                            | 77.6125446                             | 0.040086485                                  | 0.991362382                     | 50.15845393                            |
| 0.311429654                            | -80.38845876                           | 0.018903659                                  | 0.988622247                     | 56.29886571                            |
| 0.310498938                            | -189.3209337                           | 0.022346842                                  | 0.988051626                     | 54.06295017                            |
| 0.353345471                            | -18.98718764                           | 0.036202663                                  | 0.981147661                     | 32.83998623                            |
| 0.313061514                            | -60.50353679                           | 0.028789999                                  | 0.987109034                     | 55.75916572                            |
| 0.450627602                            | 82.09775001                            | 0.103482404                                  | 0.990193756                     | 39.96412054                            |
| 0.316498442                            | -274.1112491                           | 0.034042688                                  | 0.986476295                     | 70.16921967                            |
| 0.290213004                            | -181.4090454                           | 0.028535693                                  | 0.985948504                     | 63.46139079                            |
| 0.329903534                            | -18.98030042                           | 0.035300101                                  | 0.986211162                     | 54.14404401                            |
| 0.309730972                            | -240.6856166                           | 0.023753545                                  | 0.979703243                     | 48.413817                              |
| 0.399528163                            | 194.4420783                            | 0.05055794                                   | 0.982070894                     | 38.00955849                            |
| 0.392474855                            | 53.63859336                            | 0.057798403                                  | 0.984013013                     | 26.33735582                            |
| 0.318030648                            | 64.50740666                            | 0.026606861                                  | 0.988549141                     | 55.50331376                            |
| 0.442504062                            | 84.81379082                            | 0.074141022                                  | 0.991171692                     | 31.57766172                            |
| 0.342566114                            | 20.2354601                             | 0.026648474                                  | 0.979234934                     | 31.91990132                            |
| 0.361284786                            | 73.98297401                            | 0.04408309                                   | 0.985224205                     | 39.07795056                            |
| 0.351831005                            | 76.96956455                            | 0.030258136                                  | 0.986535967                     | 38.44548246                            |
| 0.322958569                            | 16.91880556                            | 0.036980557                                  | 0.98706696                      | 44.79622159                            |
| 0.283065255                            | -198.6757162                           | 0.018468186                                  | 0.988619111                     | 76.87593545                            |
| 0.301690948                            | -172.4822192                           | 0.033649467                                  | 0.98621838                      | 69.45531299                            |
| 0.33245013                             | -55.90708259                           | 0.037612523                                  | 0.987578201                     | 44.3082681                             |
| 0.351355715                            | 92.93937552                            | 0.03540014                                   | 0.981460334                     | 31.59839769                            |
| 0.386812798                            | -16.82325025                           | 0.042039842                                  | 0.987524374                     | 30.97693345                            |
| 0.34358066                             | -10.29959289                           | 0.037866825                                  | 0.98872069                      | 48.14554792                            |
| 0.376586757                            | -263.7002159                           | 0.05378744                                   | 0.98690868                      | 33.36576463                            |
| 0.289817299                            | -200.1621752                           | 0.019542867                                  | 0.983696846                     | 71.46492223                            |
| 0.319779941                            | -336.3625764                           | 0.036313497                                  | 0.98240726                      | 61.00818237                            |
| 0.31106339                             | -65.58668995                           | 0.024242509                                  | 0.987911943                     | 50.41290663                            |
| 0.365398867                            | -58.16357196                           | 0.05031321                                   | 0.989719773                     | 40.75374556                            |
| 0.38598749                             | -202.4669503                           | 0.051008568                                  | 0.992342462                     | 45.37388399                            |
| 0.387640821                            | -106.066675                            | 0.084297456                                  | 0.990795184                     | 70.93936658                            |
| 0.386851284                            | -48.58239466                           | 0.042072049                                  | 0.982672639                     | 17.47014912                            |
| 0.289152411                            | 6.697212512                            | 0.014115784                                  | 0.984189864                     | 68.33059172                            |
| 0.353503609                            | -342.6727918                           | 0.045638042                                  | 0.985149705                     | 48.1193802                             |
| 0.239701264                            | 273.4301521                            | 0.013058951                                  | 0.984476918                     | 80.23184851                            |
| 0.293877152                            | -84.68692148                           | 0.01915622                                   | 0.983651414                     | 53.91498209                            |
| 0.301129956                            | -207.5426865                           | 0.023646387                                  | 0.988802762                     | 57.14129062                            |
| 0.344643279                            | 175.6335316                            | 0.036626031                                  | 0.986111359                     | 44.95767297                            |
| 0.312940098                            | -108.343203                            | 0.025439091                                  | 0.986235442                     | 54.36099827                            |
| 0.331297222                            | 66.18150181                            | 0.035962978                                  | 0.989015631                     | 45.42889923                            |
| 0.417433986                            | 89.40636446                            | 0.056298744                                  | 0.986136119                     | 26.00593651                            |
| 0.307039614                            | -13.26506998                           | 0.023879594                                  | 0.978226191                     | 51.84128343                            |
| 0.409755235                            | 202.2612911                            | 0.056415223                                  | 0.988075964                     | 41.22402949                            |
| 0.285879237                            | -143.1774355                           | 0.025561105                                  | 0.984331987                     | 55.99004587                            |
| 0.256248112                            | 13.48935755                            | 0.014694575                                  | 0.983644865                     | 65.3540761                             |
| 0.329012782                            | 22.02045247                            | 0.025815158                                  | 0.98698542                      | 42.67533607                            |
| 0.313817453                            | 126.8573039                            | 0.026752779                                  | 0.978583322                     | 42.18826798                            |
| 0.311845892                            | 106.754651                             | 0.025106869                                  | 0.981887246                     | 52.56077383                            |
| 0.340394099                            | -86.41545591                           | 0.035808691                                  | 0.991563969                     | 43.46916216                            |
| 0.288025513                            | -133.6937391                           | 0.018341941                                  | 0.982814557                     | 55.91874224                            |
| 0.343593985                            | -298.651318                            | 0.03947107                                   | 0.987931714                     | 51.22756341                            |
| 0.323942004                            | -73.1451206                            | 0.028586648                                  | 0.982077858                     | 38.47904714                            |
| 0.334454467                            | -98.46980089                           | 0.036434632                                  | 0.988042217                     | 58.2936049                             |
| 0.391572861                            | 264.7940868                            | 0.063553455                                  | 0.990479232                     | 44.16454122                            |
| 0.328756863                            | -43.68565208                           | 0.034640452                                  | 0.988597767                     | 44.9657244                             |
| 0.317056929                            | -54.96207788                           | 0.031740186                                  | 0.988051314                     | 56.81085358                            |
| 0.33781611                             | 187.9434412                            | 0.025434806                                  | 0.991424911                     | 56.7465917                             |
| 0.352315096                            | 49.50779311                            | 0.031623255                                  | 0.981814762                     | 32.7482617                             |
| 0.37558888                             | -73.98774428                           | 0.048368682                                  | 0.99069653                      | 47.08388299                            |
| 0.424096745                            | -64.25874629                           | 0.068798326                                  | 0.989296428                     | 24.35142074                            |
| 0.331250351                            | -31.9185469                            | 0.029967396                                  | 0.99078984                      | 59.41215662                            |
| 0.332509085                            | -180.7252941                           | 0.025238685                                  | 0.990911015                     | 50.70875568                            |
| 0.404815267                            | 14.04576944                            | 0.048669281                                  | 0.987963595                     | 27.42722676                            |
| 0.327290239                            | -207.0439979                           | 0.031951411                                  | 0.984390177                     | 46.94518636                            |
| 0.348537067                            | 77.62507116                            | 0.034552948                                  | 0.990773933                     | 54.97721999                            |
| 0.331199028                            | -324.5839005                           | 0.032628241                                  | 0.987338713                     | 52.81387926                            |
| 0.255988051                            | -324.7633989                           | 0.025267752                                  | 0.977113513                     | 69.4049063                             |
| 0.271348403                            | 107.132877                             | 0.017759505                                  | 0.983030206                     | 66.882742                              |
| 0.358879983                            | -362.7649343                           | 0.045936493                                  | 0.982064801                     | 44.82160022                            |
| 0.406390151                            | 62.55531289                            | 0.045528905                                  | 0.988472522                     | 27.56834848                            |
| 0.385556949                            | 181.5823487                            | 0.048281288                                  | 0.987900105                     | 44.65319547                            |
| 0.357795952                            | 19.56853783                            | 0.043501529                                  | 0.985894063                     | 33.73865881                            |
| 0.263831634                            | -698.7377912                           | 0.01898086                                   | 0.983365303                     | 89.76677312                            |
| 0.260800597                            | -845.6273759                           | 0.024025605                                  | 0.978456644                     | 98.70626657                            |
| 0.340597821                            | -52.47405133                           | 0.036075616                                  | 0.986115649                     | 44.0735901                             |
| 0.34138694                             | -9.831373017                           | 0.035763427                                  | 0.987480174                     | 46.81864585                            |
| 0.370605178                            | -125.7567908                           | 0.035115026                                  | 0.985993645                     | 35.514965                              |
| 0.285418056                            | -143.3926332                           | 0.020639408                                  | 0.984656481                     | 66.1827936                             |
| 0.464107063                            | 90.85959359                            | 0.070738091                                  | 0.991292839                     | 26.75215674                            |
| 0.309328371                            | -509.3897141                           | 0.037021746                                  | 0.979367156                     | 67.92962008                            |
| 0.354193072                            | 49.74297498                            | 0.041558236                                  | 0.984336529                     | 51.33067736                            |
| 0.369345738                            | -27.06598388                           | 0.036518223                                  | 0.98738296                      | 40.52685392                            |
| 0.375288564                            | -120.7724693                           | 0.03976099                                   | 0.988787671                     | 40.70177103                            |
| 0.459647963                            | 188.9539849                            | 0.087426679                                  | 0.98654858                      | 33.23090623                            |
| 0.285340663                            | 25.73480003                            | 0.018135355                                  | 0.980837531                     | 63.58344682                            |
| 0.303078145                            | -231.092009                            | 0.022395624                                  | 0.985887918                     | 53.44125749                            |
| 0.336898831                            | -118.2690816                           | 0.032176706                                  | 0.986676804                     | 45.86263119                            |
| 0.302491085                            | -117.481434                            | 0.020100938                                  | 0.98298447                      | 46.81247863                            |
| 0.348117438                            | -198.2107514                           | 0.048853726                                  | 0.98802414                      | 69.29485815                            |
| 0.334626977                            | 16.22514608                            | 0.029176806                                  | 0.98565545                      | 52.05369995                            |
| 0.388671627                            | -511.1411825                           | 0.048459967                                  | 0.983754648                     | 49.84712715                            |
| 0.398485305                            | -61.27657658                           | 0.045967889                                  | 0.98458431                      | 26.27954146                            |
| 0.376886429                            | 119.1111577                            | 0.048416777                                  | 0.98876709                      | 39.34497913                            |

| log.sigma.3.0.mm.3D_glc_m_Contrast | log.sigma.3.0.mm.3D_glc_m_DifferenceEntropy | log.sigma.3.0.mm.3D_glc_m_InverseVariance | log.sigma.3.0.mm.3D_glc_m_Entropy | log.sigma.3.0.mm.3D_glc_m_Dissimilarity |
|------------------------------------|---------------------------------------------|-------------------------------------------|-----------------------------------|-----------------------------------------|
| 33.89646936                        | 3.578089128                                 | 0.251244527                               | 8.29728857                        | 4.201638096                             |
| 8.372318278                        | 2.662262607                                 | 0.38532292                                | 6.523585182                       | 2.095018135                             |
| 9.624473024                        | 2.755142664                                 | 0.362311386                               | 7.053124712                       | 2.231199279                             |
| 22.85855772                        | 3.28685529                                  | 0.294948121                               | 7.808744976                       | 3.434525695                             |
| 14.72877484                        | 3.040092704                                 | 0.322654103                               | 7.461766227                       | 2.775683986                             |
| 16.82595039                        | 3.094577646                                 | 0.289679224                               | 7.394217726                       | 3.056542994                             |
| 13.21885258                        | 2.982727315                                 | 0.322184619                               | 7.503581256                       | 2.655058803                             |
| 13.03167535                        | 2.965831429                                 | 0.335457962                               | 7.404829205                       | 2.602135732                             |
| 17.32125806                        | 3.137851975                                 | 0.306277694                               | 7.80183893                        | 3.016916073                             |
| 14.59141256                        | 3.02892032                                  | 0.310325044                               | 7.384446166                       | 2.835396894                             |
| 9.804461162                        | 2.788903982                                 | 0.350400173                               | 6.967978041                       | 2.354691409                             |
| 15.77045579                        | 3.096143371                                 | 0.309991416                               | 7.57082473                        | 2.92140419                              |
| 9.519566549                        | 2.664999035                                 | 0.381204399                               | 6.436022533                       | 2.002091973                             |
| 21.43892807                        | 3.199123554                                 | 0.310813548                               | 7.639703031                       | 3.159613009                             |
| 23.95376476                        | 3.335034289                                 | 0.288391627                               | 7.748643515                       | 3.50662842                              |
| 16.12434555                        | 3.074449308                                 | 0.319701715                               | 7.596160552                       | 2.862804831                             |
| 16.1891906                         | 3.080578221                                 | 0.315324617                               | 7.426314819                       | 2.943023777                             |
| 9.608754347                        | 2.724216892                                 | 0.378023173                               | 6.699246116                       | 2.169973305                             |
| 7.502160705                        | 2.622793356                                 | 0.368552758                               | 6.58331868                        | 2.045309447                             |
| 13.89186064                        | 3.022213394                                 | 0.312573671                               | 7.659424505                       | 2.780270262                             |
| 6.764719632                        | 2.533648899                                 | 0.395189175                               | 6.523968529                       | 1.823151473                             |
| 8.914436016                        | 2.724665267                                 | 0.347197531                               | 6.936672444                       | 2.310809288                             |
| 10.66214135                        | 2.829338105                                 | 0.350348702                               | 6.937442571                       | 2.384396036                             |
| 11.20311992                        | 2.872241237                                 | 0.339593164                               | 7.213009119                       | 2.460538196                             |
| 17.16590244                        | 3.074929447                                 | 0.318530766                               | 7.266138514                       | 2.913265993                             |
| 21.20966987                        | 3.26060064                                  | 0.289937603                               | 7.93973369                        | 3.346234215                             |
| 21.432547                          | 3.255283891                                 | 0.296186738                               | 7.867900358                       | 3.275686036                             |
| 15.31192003                        | 3.052355834                                 | 0.326900936                               | 7.391942071                       | 2.793876689                             |
| 7.875172356                        | 2.627217546                                 | 0.361172884                               | 6.540152011                       | 2.187655042                             |
| 8.999263592                        | 2.703973493                                 | 0.378662775                               | 6.800225528                       | 2.15824225                              |
| 14.66520241                        | 3.013317823                                 | 0.338967075                               | 7.421402104                       | 2.711310987                             |
| 13.64991271                        | 2.919331911                                 | 0.360843424                               | 6.775007899                       | 2.511296714                             |
| 21.53028933                        | 3.278553116                                 | 0.290757607                               | 8.010776583                       | 3.354243409                             |
| 18.48300427                        | 3.169232942                                 | 0.308080079                               | 7.621809192                       | 3.055589095                             |
| 14.77587309                        | 3.049684996                                 | 0.311352563                               | 7.632302866                       | 2.848659788                             |
| 11.87521045                        | 2.87332889                                  | 0.34934987                                | 7.042078662                       | 2.442432276                             |
| 15.04720935                        | 2.932496009                                 | 0.361925847                               | 7.033176496                       | 2.533760874                             |
| 17.20832065                        | 3.079379422                                 | 0.31320418                                | 7.482784996                       | 2.743892147                             |
| 7.457502636                        | 2.602640705                                 | 0.37946415                                | 6.299879918                       | 2.037996129                             |
| 17.25115817                        | 3.161732406                                 | 0.291195523                               | 8.059411165                       | 3.114692801                             |
| 16.60490375                        | 3.044737327                                 | 0.343220353                               | 7.243291081                       | 2.779322937                             |
| 24.99184972                        | 3.401732753                                 | 0.248675004                               | 8.322963087                       | 3.819637149                             |
| 18.11659791                        | 3.156977885                                 | 0.294873575                               | 7.780045659                       | 3.118431709                             |
| 20.89925784                        | 3.249068337                                 | 0.299200986                               | 7.709043369                       | 3.262033162                             |
| 10.68572085                        | 2.846165689                                 | 0.340366619                               | 7.108034078                       | 2.45706388                              |
| 16.94569971                        | 3.12343025                                  | 0.312160506                               | 7.63385816                        | 2.984280774                             |
| 14.18335942                        | 3.014214808                                 | 0.331329761                               | 7.401065998                       | 2.733208273                             |
| 5.83097464                         | 2.458249384                                 | 0.400181028                               | 6.314551532                       | 1.818584875                             |
| 14.87415516                        | 3.043447687                                 | 0.311605394                               | 7.411154993                       | 2.881162251                             |
| 8.586188732                        | 2.672894701                                 | 0.376468408                               | 6.717932477                       | 2.077788353                             |
| 18.42825322                        | 3.180516683                                 | 0.288276247                               | 7.724456485                       | 3.164958913                             |
| 22.64224803                        | 3.335628937                                 | 0.265698628                               | 8.108493664                       | 3.582366245                             |
| 12.34120886                        | 2.945659077                                 | 0.329303706                               | 7.403312921                       | 2.625375225                             |
| 13.48088966                        | 2.963375105                                 | 0.318598547                               | 7.25108263                        | 2.750495433                             |
| 14.17182359                        | 3.023157626                                 | 0.313927585                               | 7.468412698                       | 2.826645479                             |
| 13.44490978                        | 2.956657891                                 | 0.337476324                               | 7.203934457                       | 2.632302967                             |
| 17.686061                          | 3.175872216                                 | 0.287839538                               | 7.835768276                       | 3.150539063                             |
| 15.93401657                        | 3.025996703                                 | 0.341789999                               | 7.357450029                       | 2.751674424                             |
| 15.34059192                        | 3.051497231                                 | 0.325575109                               | 7.271926498                       | 2.824264888                             |
| 18.36737807                        | 3.181271164                                 | 0.305915303                               | 7.844866965                       | 3.013344712                             |
| 12.46189249                        | 2.874453035                                 | 0.357849221                               | 6.938374393                       | 2.39248099                              |
| 13.03689586                        | 2.976324797                                 | 0.325620698                               | 7.372013271                       | 2.677311855                             |
| 16.33465868                        | 3.122669535                                 | 0.310502123                               | 6.971807339                       | 2.946930846                             |
| 13.62710832                        | 2.980813721                                 | 0.331701115                               | 7.56970451                        | 2.664845562                             |
| 9.450608162                        | 2.735894701                                 | 0.346321129                               | 6.877874667                       | 2.319826177                             |
| 13.55049809                        | 2.923415873                                 | 0.35855928                                | 7.163764653                       | 2.501360433                             |
| 9.86582637                         | 2.689026149                                 | 0.38534457                                | 6.382123078                       | 2.081623736                             |
| 17.11516881                        | 3.104975142                                 | 0.325761996                               | 7.697443997                       | 2.895090485                             |
| 14.4969628                         | 3.018691814                                 | 0.326389969                               | 7.537498578                       | 2.735262517                             |
| 8.006243656                        | 2.636703619                                 | 0.392827508                               | 6.6732034                         | 2.027773001                             |
| 14.1956144                         | 2.980949883                                 | 0.324455726                               | 7.284183549                       | 2.731499902                             |
| 13.34600726                        | 2.945196034                                 | 0.342662138                               | 7.427197133                       | 2.581325089                             |
| 16.70730414                        | 3.07767834                                  | 0.325367178                               | 7.412080766                       | 2.860700002                             |
| 17.26089136                        | 3.454611681                                 | 0.256700085                               | 8.079704066                       | 3.872437723                             |
| 19.78793989                        | 3.242304074                                 | 0.280078218                               | 8.041079509                       | 3.346741721                             |
| 14.61420231                        | 2.963070361                                 | 0.341726269                               | 7.034646644                       | 2.621821531                             |
| 7.645842296                        | 2.614673631                                 | 0.386043017                               | 6.658298172                       | 1.9957395                               |
| 9.358753859                        | 2.722176513                                 | 0.375642083                               | 6.839683535                       | 2.201465969                             |
| 10.17703813                        | 2.805939563                                 | 0.350384243                               | 6.98510577                        | 2.351431165                             |
| 25.92104724                        | 3.394799975                                 | 0.265806732                               | 8.138040201                       | 3.703332861                             |
| 32.52157027                        | 3.541350477                                 | 0.258802171                               | 8.212704114                       | 4.083621358                             |
| 17.33735723                        | 3.109663897                                 | 0.322636928                               | 7.346677707                       | 2.896993492                             |
| 15.4598491                         | 3.038925838                                 | 0.320889007                               | 7.403910128                       | 2.776950376                             |
| 8.559475437                        | 2.68595879                                  | 0.369273365                               | 6.984797685                       | 2.181937618                             |
| 18.91746679                        | 3.201200393                                 | 0.289852565                               | 7.903380867                       | 3.230471575                             |
| 4.785794061                        | 2.337930084                                 | 0.421942645                               | 6.122372619                       | 1.592842277                             |
| 23.33121949                        | 3.304630839                                 | 0.302834841                               | 7.807863025                       | 3.39244203                              |
| 12.30024456                        | 2.922928317                                 | 0.345582433                               | 7.359279005                       | 2.528226363                             |
| 10.46830515                        | 2.817944193                                 | 0.35158475                                | 7.017961289                       | 2.3515455                               |
| 11.58255065                        | 2.823703262                                 | 0.370048503                               | 7.041435663                       | 2.360649434                             |
| 6.370513421                        | 2.471569194                                 | 0.410623176                               | 6.031224861                       | 1.754575738                             |
| 17.23877778                        | 3.170215323                                 | 0.284282229                               | 7.894093486                       | 3.161443206                             |
| 18.49363662                        | 3.183869373                                 | 0.306217808                               | 7.726842247                       | 3.110207439                             |
| 14.57071491                        | 3.012255787                                 | 0.335227547                               | 7.386731056                       | 2.730546714                             |
| 15.37470745                        | 3.077752811                                 | 0.305892801                               | 7.633902963                       | 2.92387867                              |
| 18.70705581                        | 3.132404839                                 | 0.324658508                               | 7.646446849                       | 2.920881474                             |
| 11.90596702                        | 2.921310279                                 | 0.328585532                               | 7.48428013                        | 2.580560316                             |
| 14.06504618                        | 2.894788353                                 | 0.376152043                               | 6.860486786                       | 2.499628306                             |
| 7.999281328                        | 2.629189145                                 | 0.392024247                               | 6.522384495                       | 2.055512311                             |
| 11.47017747                        | 2.868049153                                 | 0.351654873                               | 7.09973766                        | 2.388470068                             |



| log.sigma.3.0.mm.3D_glc_m_DifferenceVariance | log.sigma.3.0.mm.3D_glc_m_ldn | log.sigma.3.0.mm.3D_glc_m_ldm | log.sigma.3.0.mm.3D_glc_m_Correlation | log.sigma.3.0.mm.3D_glc_m_Autocorrelation |
|----------------------------------------------|-------------------------------|-------------------------------|---------------------------------------|-------------------------------------------|
| 15.76680857                                  | 0.907769424                   | 0.252683069                   | 0.490461849                           | 542.9007971                               |
| 3.880535422                                  | 0.918679192                   | 0.394574608                   | 0.554364768                           | 130.0406255                               |
| 4.490264837                                  | 0.925822791                   | 0.385657524                   | 0.618173364                           | 163.7201151                               |
| 10.66728422                                  | 0.91010613                    | 0.286593665                   | 0.531155953                           | 333.472505                                |
| 6.860833619                                  | 0.915820727                   | 0.330011329                   | 0.524021528                           | 276.5069546                               |
| 7.025781858                                  | 0.910636036                   | 0.299870937                   | 0.595594787                           | 184.0152716                               |
| 5.993549728                                  | 0.941990419                   | 0.337720151                   | 0.58325245                            | 407.8678295                               |
| 6.14394921                                   | 0.939158673                   | 0.345939326                   | 0.58535795                            | 502.509436                                |
| 7.907101971                                  | 0.930568489                   | 0.311429654                   | 0.532831382                           | 507.2807867                               |
| 6.377810558                                  | 0.927085863                   | 0.310498938                   | 0.573624994                           | 477.5897091                               |
| 4.105749564                                  | 0.90926877                    | 0.353345471                   | 0.536659318                           | 166.5462891                               |
| 7.081528031                                  | 0.925338676                   | 0.313061514                   | 0.559237087                           | 393.8313757                               |
| 5.390956816                                  | 0.941822727                   | 0.450627602                   | 0.61388362                            | 302.7530769                               |
| 11.15095767                                  | 0.928603282                   | 0.316498442                   | 0.533594793                           | 575.1820698                               |
| 11.32199512                                  | 0.924529401                   | 0.290213004                   | 0.455830284                           | 441.4499187                               |
| 7.591971425                                  | 0.925238943                   | 0.329903534                   | 0.544595308                           | 326.6422074                               |
| 7.272765542                                  | 0.908473097                   | 0.309730972                   | 0.49664797                            | 246.1351958                               |
| 4.763431151                                  | 0.916871673                   | 0.399528163                   | 0.584612578                           | 124.3242745                               |
| 3.20684576                                   | 0.916502113                   | 0.392474855                   | 0.553935258                           | 137.6255715                               |
| 5.988398036                                  | 0.928291978                   | 0.318030648                   | 0.598656768                           | 343.1230489                               |
| 3.364640574                                  | 0.940258546                   | 0.442504062                   | 0.642278136                           | 193.4774369                               |
| 3.471205079                                  | 0.902407273                   | 0.342566114                   | 0.559808281                           | 127.2908397                               |
| 4.858000089                                  | 0.921130871                   | 0.361284786                   | 0.567087305                           | 171.6916834                               |
| 5.001857645                                  | 0.92387197                    | 0.351831005                   | 0.547274375                           | 206.7351471                               |
| 8.364094775                                  | 0.928038267                   | 0.322958569                   | 0.447291488                           | 385.2075983                               |
| 9.686723459                                  | 0.930291622                   | 0.283065255                   | 0.561828903                           | 560.6196557                               |
| 10.37585166                                  | 0.925770211                   | 0.301690948                   | 0.529939708                           | 372.7378152                               |
| 7.341956102                                  | 0.928661765                   | 0.33245013                    | 0.486159519                           | 386.6791879                               |
| 2.965337102                                  | 0.906701535                   | 0.351355715                   | 0.59854233                            | 123.6776609                               |
| 4.211541715                                  | 0.92788929                    | 0.386812798                   | 0.549418262                           | 227.9762728                               |
| 7.112807762                                  | 0.93239309                    | 0.34358066                    | 0.534806107                           | 411.0102021                               |
| 7.158922888                                  | 0.930347575                   | 0.376586757                   | 0.422794957                           | 349.4386521                               |
| 9.959694231                                  | 0.918268447                   | 0.289817299                   | 0.538741227                           | 378.0739951                               |
| 8.860088423                                  | 0.91662488                    | 0.319779941                   | 0.53527789                            | 363.941622                                |
| 6.48490285                                   | 0.926815105                   | 0.31106339                    | 0.545163878                           | 290.154641                                |
| 5.74635025                                   | 0.935012603                   | 0.365398867                   | 0.547335444                           | 374.2146479                               |
| 8.401179158                                  | 0.947798781                   | 0.38598749                    | 0.503747854                           | 626.5312545                               |
| 9.368299916                                  | 0.942720722                   | 0.387640821                   | 0.610257451                           | 563.0009975                               |
| 3.218786451                                  | 0.91313272                    | 0.386851284                   | 0.401606893                           | 151.6778095                               |
| 7.318246612                                  | 0.916403747                   | 0.289152411                   | 0.596474265                           | 279.7083695                               |
| 8.643401094                                  | 0.925979495                   | 0.353503609                   | 0.488156684                           | 324.8142946                               |
| 9.932106652                                  | 0.915577171                   | 0.239701264                   | 0.52909857                            | 339.7811731                               |
| 7.977759285                                  | 0.91673575                    | 0.293877152                   | 0.503729643                           | 352.963066                                |
| 9.990717083                                  | 0.932126386                   | 0.301129956                   | 0.466095983                           | 504.8287215                               |
| 4.52589666                                   | 0.921133105                   | 0.344643279                   | 0.612222353                           | 177.7595617                               |
| 7.826968877                                  | 0.924198723                   | 0.312940098                   | 0.523644192                           | 396.3223918                               |
| 6.545036406                                  | 0.931543271                   | 0.331297222                   | 0.523623935                           | 372.5716395                               |
| 2.44289714                                   | 0.921188403                   | 0.417433986                   | 0.629208835                           | 102.2918134                               |
| 6.38293103                                   | 0.903502643                   | 0.307039614                   | 0.553105153                           | 200.5078523                               |
| 4.120520095                                  | 0.930512208                   | 0.409755235                   | 0.645339988                           | 136.8099813                               |
| 8.212085017                                  | 0.917719518                   | 0.285879237                   | 0.504757392                           | 408.3729441                               |
| 9.499721675                                  | 0.914691516                   | 0.256248112                   | 0.487902217                           | 298.1209528                               |
| 5.316123499                                  | 0.923868611                   | 0.329012782                   | 0.548404182                           | 223.512919                                |
| 5.623649834                                  | 0.90386035                    | 0.313817453                   | 0.514301509                           | 133.081899                                |
| 5.987906089                                  | 0.910984398                   | 0.311845892                   | 0.569947174                           | 229.7475178                               |
| 6.358038903                                  | 0.939966158                   | 0.340394099                   | 0.525903336                           | 561.05434                                 |
| 7.488885677                                  | 0.913260506                   | 0.288025513                   | 0.52020488                            | 346.2497056                               |
| 8.150575836                                  | 0.931881817                   | 0.343593985                   | 0.527210931                           | 413.8143929                               |
| 7.195101443                                  | 0.914615446                   | 0.323942004                   | 0.428284287                           | 268.1137626                               |
| 9.06285996                                   | 0.93113222                    | 0.334454467                   | 0.521976974                           | 494.7134756                               |
| 6.617527844                                  | 0.939994365                   | 0.391572861                   | 0.557025498                           | 255.837755                                |
| 5.734128921                                  | 0.928882391                   | 0.328756863                   | 0.550826334                           | 379.3455644                               |
| 7.485104329                                  | 0.928594894                   | 0.317056929                   | 0.552823755                           | 469.4152212                               |
| 6.31847941                                   | 0.93925314                    | 0.33781611                    | 0.609485638                           | 507.0216145                               |
| 3.904907785                                  | 0.910308622                   | 0.352315096                   | 0.546683202                           | 134.0023315                               |
| 7.124153086                                  | 0.940545827                   | 0.37558888                    | 0.556130289                           | 455.6219586                               |
| 5.415546295                                  | 0.937592276                   | 0.424096745                   | 0.424711952                           | 317.875676                                |
| 8.541549047                                  | 0.93915929                    | 0.331250351                   | 0.55249262                            | 496.3590139                               |
| 6.823384638                                  | 0.937878845                   | 0.332509085                   | 0.5549685                             | 497.8790774                               |
| 3.799083398                                  | 0.929410255                   | 0.404815267                   | 0.543480092                           | 221.4324355                               |
| 6.401620221                                  | 0.919359559                   | 0.327290239                   | 0.540454385                           | 315.5071119                               |
| 6.544645136                                  | 0.938353068                   | 0.348537067                   | 0.609504737                           | 429.4100611                               |
| 8.319043862                                  | 0.929286728                   | 0.331199028                   | 0.518616604                           | 488.2633722                               |
| 11.86950359                                  | 0.902288492                   | 0.255998051                   | 0.438930295                           | 556.5882253                               |
| 8.285277799                                  | 0.913305151                   | 0.271348403                   | 0.543183722                           | 272.8199452                               |
| 7.496348084                                  | 0.918375706                   | 0.358879983                   | 0.509771                              | 339.8213667                               |
| 3.575559661                                  | 0.930276535                   | 0.406390151                   | 0.557366352                           | 176.9432051                               |
| 4.353227106                                  | 0.929038014                   | 0.385556949                   | 0.653543071                           | 199.225518                                |
| 4.536290676                                  | 0.921863787                   | 0.357795952                   | 0.534977384                           | 193.0382298                               |
| 11.78771368                                  | 0.916930671                   | 0.263831634                   | 0.553587151                           | 470.1627807                               |
| 15.37802169                                  | 0.908109743                   | 0.260800597                   | 0.508026232                           | 497.507809                                |
| 8.74420849                                   | 0.926843136                   | 0.340597821                   | 0.434770696                           | 186.1005307                               |
| 7.455110247                                  | 0.929228239                   | 0.34138694                    | 0.506092503                           | 374.7166824                               |
| 3.638163731                                  | 0.921309892                   | 0.370605178                   | 0.610608684                           | 215.3254599                               |
| 8.177147914                                  | 0.918318877                   | 0.285418056                   | 0.555052609                           | 290.928587                                |
| 2.193542544                                  | 0.938462846                   | 0.464107063                   | 0.692398796                           | 211.216844                                |
| 11.45456956                                  | 0.911687297                   | 0.309328371                   | 0.489905873                           | 388.8707105                               |
| 5.795778691                                  | 0.919940485                   | 0.354193072                   | 0.609954874                           | 229.0017544                               |
| 4.803508519                                  | 0.927034093                   | 0.369345738                   | 0.586488492                           | 233.300374                                |
| 5.869095715                                  | 0.933645097                   | 0.375288564                   | 0.556401485                           | 359.059154                                |
| 3.160350657                                  | 0.928139442                   | 0.459647963                   | 0.671296373                           | 101.9586326                               |
| 7.033860459                                  | 0.907547467                   | 0.285340663                   | 0.572617399                           | 268.27391                                 |
| 8.615847113                                  | 0.923403839                   | 0.303078145                   | 0.486738076                           | 400.0196243                               |
| 6.927499924                                  | 0.926259141                   | 0.336898831                   | 0.515604854                           | 375.0393609                               |
| 6.628898828                                  | 0.913926532                   | 0.302491085                   | 0.504982144                           | 293.5889574                               |
| 9.937618106                                  | 0.933550289                   | 0.348117438                   | 0.574270454                           | 525.4339583                               |
| 5.089106187                                  | 0.920344685                   | 0.334626977                   | 0.627204799                           | 209.681712                                |
| 7.566663445                                  | 0.924706317                   | 0.388671627                   | 0.564096893                           | 335.5012855                               |
| 3.653191051                                  | 0.919943451                   | 0.398485305                   | 0.530496407                           | 195.0752238                               |
| 5.616998988                                  | 0.932777238                   | 0.376886429                   | 0.548239144                           | 270.5975891                               |

| log.sigma.3.0.mm.3D_glcmm_SumEntropy | log.sigma.3.0.mm.3D_glcmm_AverageIntensity | log.sigma.3.0.mm.3D_glcmm_Energy | log.sigma.3.0.mm.3D_glcmm_SumSquares | log.sigma.3.0.mm.3D_glcmm_ClusterProminence |
|--------------------------------------|--------------------------------------------|----------------------------------|--------------------------------------|---------------------------------------------|
| 5.22859212                           | 23.12304552                                | 0.005419548                      | 31.56426662                          | 38940.44703                                 |
| 4.319857615                          | 11.16451596                                | 0.019057327                      | 9.570200675                          | 3553.00372                                  |
| 4.670317858                          | 12.48679802                                | 0.011934129                      | 12.71913497                          | 5622.911559                                 |
| 5.031462276                          | 18.04554533                                | 0.006674568                      | 24.49517916                          | 17453.00011                                 |
| 4.759723251                          | 16.42535197                                | 0.009527391                      | 15.85224054                          | 8428.110663                                 |
| 4.870788471                          | 13.12611549                                | 0.009140215                      | 21.64468895                          | 13669.66427                                 |
| 4.804267007                          | 20.02386973                                | 0.009875582                      | 15.56802379                          | 9743.984562                                 |
| 4.768129568                          | 22.27692326                                | 0.011088164                      | 15.29508838                          | 10564.54051                                 |
| 4.923751318                          | 22.40520042                                | 0.006865284                      | 17.64626334                          | 11278.72157                                 |
| 4.789558306                          | 21.71183784                                | 0.008427972                      | 16.78341762                          | 13989.72265                                 |
| 4.501518513                          | 12.67996407                                | 0.012034099                      | 10.66111185                          | 3674.421104                                 |
| 4.858244839                          | 19.68783464                                | 0.008867475                      | 17.70884197                          | 12163.54896                                 |
| 4.384427089                          | 17.22203775                                | 0.029173024                      | 12.71648758                          | 9066.372046                                 |
| 4.944949114                          | 23.81481428                                | 0.00905007                       | 22.29623657                          | 26488.86003                                 |
| 4.915589234                          | 20.92974497                                | 0.008521948                      | 20.93215957                          | 18514.47687                                 |
| 4.857917086                          | 17.91187362                                | 0.009727068                      | 17.81952798                          | 10989.95032                                 |
| 4.734765559                          | 15.43845665                                | 0.008490173                      | 16.25239975                          | 9155.243116                                 |
| 4.445025805                          | 10.82602018                                | 0.01793218                       | 11.90457821                          | 5334.121566                                 |
| 4.308522607                          | 11.52885647                                | 0.016468853                      | 8.459879131                          | 2072.008394                                 |
| 4.890569084                          | 18.32997281                                | 0.008279299                      | 17.40945013                          | 10858.3034                                  |
| 4.394871764                          | 13.68720037                                | 0.021917492                      | 9.630077251                          | 4287.383771                                 |
| 4.494638582                          | 11.02428461                                | 0.01107325                       | 10.20858433                          | 2893.58542                                  |
| 4.537293807                          | 12.82992014                                | 0.014374624                      | 12.45808674                          | 5675.807652                                 |
| 4.620097295                          | 14.15081485                                | 0.01066827                       | 12.56255635                          | 5430.256474                                 |
| 4.655401373                          | 19.5887034                                 | 0.010919036                      | 15.14847248                          | 9391.562205                                 |
| 5.081370256                          | 23.49727561                                | 0.006449918                      | 24.07927387                          | 27310.11017                                 |
| 4.971835517                          | 19.154704                                  | 0.008416743                      | 22.26543761                          | 22084.94816                                 |
| 4.68674323                           | 19.5880812                                 | 0.010806135                      | 14.6609536                           | 8635.848491                                 |
| 4.353230443                          | 10.85091556                                | 0.014416084                      | 9.868392511                          | 2744.831055                                 |
| 4.44185563                           | 14.9175802                                 | 0.015105837                      | 10.01908859                          | 4264.407757                                 |
| 4.734400441                          | 20.20189203                                | 0.0112578                        | 15.26407122                          | 10471.91995                                 |
| 4.297955364                          | 18.66800532                                | 0.018548418                      | 11.98395253                          | 8201.645736                                 |
| 5.062601005                          | 19.29100144                                | 0.006479314                      | 22.86115789                          | 18489.95653                                 |
| 4.88364321                           | 18.9164833                                 | 0.009093192                      | 20.07399718                          | 16858.30753                                 |
| 4.829911641                          | 16.86310843                                | 0.007699512                      | 16.56230142                          | 8953.072773                                 |
| 4.565759223                          | 19.27246879                                | 0.014465812                      | 13.2009301                           | 8531.054887                                 |
| 4.559158321                          | 24.97272118                                | 0.017225145                      | 15.00028675                          | 13801.96417                                 |
| 4.957252854                          | 23.55799972                                | 0.016161682                      | 21.74164642                          | 20465.62297                                 |
| 4.02829631                           | 12.21365217                                | 0.018072782                      | 6.231912938                          | 1347.171723                                 |
| 5.079017612                          | 16.43212595                                | 0.005394145                      | 21.87038534                          | 13795.96042                                 |
| 4.623382126                          | 17.91184621                                | 0.013652313                      | 16.38793228                          | 13466.43943                                 |
| 5.159643931                          | 18.27183752                                | 0.004450533                      | 26.07102881                          | 24195.05316                                 |
| 4.886112394                          | 18.70324221                                | 0.006875507                      | 18.15715533                          | 10243.80848                                 |
| 4.85550832                           | 22.37193769                                | 0.008076503                      | 18.80991403                          | 14334.38591                                 |
| 4.645951967                          | 13.00899176                                | 0.011876722                      | 13.96056788                          | 7016.719651                                 |
| 4.83065087                           | 19.79380447                                | 0.008418423                      | 17.61367924                          | 13435.04909                                 |
| 4.688055893                          | 19.24005643                                | 0.011205432                      | 14.65359808                          | 9473.990719                                 |
| 4.256284338                          | 9.861141336                                | 0.020199406                      | 7.959227788                          | 2456.543039                                 |
| 4.820393241                          | 13.82912901                                | 0.008488083                      | 16.67885965                          | 8318.587606                                 |
| 4.512307169                          | 11.34492878                                | 0.017516217                      | 12.52299368                          | 6119.919811                                 |
| 4.875643262                          | 20.1454775                                 | 0.007331852                      | 18.30906191                          | 12917.306                                   |
| 5.024712854                          | 17.10986741                                | 0.005365072                      | 22.19943758                          | 15339.84571                                 |
| 4.701264893                          | 14.72522362                                | 0.00960614                       | 14.07568767                          | 6476.358109                                 |
| 4.657046556                          | 11.22046081                                | 0.009638031                      | 13.91728941                          | 5694.78238                                  |
| 4.80103797                           | 14.8586937                                 | 0.008056887                      | 16.97467057                          | 7517.918407                                 |
| 4.661845752                          | 23.58773846                                | 0.011710088                      | 13.70926738                          | 8260.207621                                 |
| 4.907553154                          | 18.46531028                                | 0.006700019                      | 18.67257779                          | 11121.3781                                  |
| 4.710089101                          | 20.25609405                                | 0.011915578                      | 16.2782315                           | 14607.39781                                 |
| 4.601206526                          | 16.2276615                                 | 0.010701196                      | 13.74503465                          | 6184.478278                                 |
| 4.937834495                          | 22.10913676                                | 0.00778593                       | 18.47002268                          | 12646.46828                                 |
| 4.551609524                          | 15.81813426                                | 0.018141763                      | 14.50638355                          | 9657.458106                                 |
| 4.717023032                          | 19.37482529                                | 0.010010861                      | 14.47370302                          | 7632.456783                                 |
| 4.880663234                          | 21.52025881                                | 0.008512124                      | 17.77263414                          | 13539.98785                                 |
| 4.853328329                          | 22.35034249                                | 0.00911376                       | 17.34379282                          | 13020.5228                                  |
| 4.493658223                          | 11.32023214                                | 0.011823627                      | 10.54971747                          | 3420.336593                                 |
| 4.648429586                          | 21.22879443                                | 0.014775684                      | 14.56515633                          | 13160.86281                                 |
| 4.188260635                          | 17.75860266                                | 0.023579365                      | 8.731103084                          | 4105.891336                                 |
| 4.90334843                           | 22.13860844                                | 0.009469106                      | 18.77751221                          | 15855.05715                                 |
| 4.814167279                          | 22.19481144                                | 0.008937627                      | 15.60181013                          | 11485.97722                                 |
| 4.358762192                          | 14.71619869                                | 0.016641482                      | 8.858367605                          | 2861.42419                                  |
| 4.686879365                          | 17.58267772                                | 0.010152008                      | 15.62062948                          | 10912.19478                                 |
| 4.828287691                          | 20.55634891                                | 0.010755601                      | 16.56523356                          | 12401.66119                                 |
| 4.756854753                          | 21.98805836                                | 0.010061101                      | 16.76339796                          | 16323.39895                                 |
| 5.006653196                          | 18.812457                                  | 0.006258798                      | 24.07112975                          | 17149.49683                                 |
| 5.041498184                          | 16.27670263                                | 0.005518854                      | 22.21814267                          | 14981.64883                                 |
| 4.584658129                          | 18.25026066                                | 0.013150139                      | 15.01271498                          | 11279.63252                                 |
| 4.36513085                           | 13.11292854                                | 0.01664711                       | 8.803547695                          | 2932.636632                                 |
| 4.603979566                          | 13.81230008                                | 0.015714544                      | 13.72258707                          | 8463.290371                                 |
| 4.512938242                          | 13.6817791                                 | 0.012795009                      | 10.99854279                          | 4241.243433                                 |
| 5.137010784                          | 21.44785601                                | 0.005831778                      | 28.04965046                          | 29672.61861                                 |
| 5.204722272                          | 22.11665581                                | 0.005847239                      | 31.33962735                          | 40455.90555                                 |
| 4.643960918                          | 13.43983419                                | 0.011464243                      | 15.68301629                          | 9344.681                                    |
| 4.724083466                          | 19.2831259                                 | 0.010843291                      | 15.49703352                          | 10342.04947                                 |
| 4.549854631                          | 14.44188098                                | 0.012429191                      | 11.01861011                          | 5027.096019                                 |
| 5.016189843                          | 16.83180203                                | 0.006475115                      | 21.59175111                          | 15797.47599                                 |
| 4.211780597                          | 14.3429318                                 | 0.02580468                       | 7.8844877                            | 2697.024132                                 |
| 4.908033036                          | 19.6048684                                 | 0.008856529                      | 22.71500548                          | 20497.69539                                 |
| 4.783514993                          | 14.81913654                                | 0.010938721                      | 16.08703275                          | 8825.729391                                 |
| 4.616551776                          | 15.03390337                                | 0.012645754                      | 12.85431044                          | 6401.889519                                 |
| 4.604528504                          | 18.84370455                                | 0.013463658                      | 13.22560361                          | 8337.082192                                 |
| 4.150634577                          | 9.758388702                                | 0.031894662                      | 9.900354914                          | 3429.441237                                 |
| 5.000950271                          | 16.07920117                                | 0.006036053                      | 20.7405999                           | 12170.58862                                 |
| 4.829115722                          | 19.93571317                                | 0.00809353                       | 17.4888662                           | 13078.7872                                  |
| 4.710227353                          | 19.26786733                                | 0.01066378                       | 15.19495172                          | 9498.714271                                 |
| 4.783501481                          | 16.94508814                                | 0.007596772                      | 15.82921083                          | 7368.88166                                  |
| 4.965483927                          | 22.73912926                                | 0.010614797                      | 21.28266588                          | 21778.53828                                 |
| 4.84504816                           | 14.14044819                                | 0.008998667                      | 16.16832912                          | 9206.941061                                 |
| 4.52921474                           | 18.11980453                                | 0.016358867                      | 16.26334711                          | 14638.72639                                 |
| 4.31136442                           | 13.80225735                                | 0.016983712                      | 8.569705698                          | 2766.550317                                 |
| 4.582077489                          | 16.30874614                                | 0.014446086                      | 13.14191879                          | 5151.404938                                 |

| log.sigma.3.0.mm.3D_glc_m_SumAverage | log.sigma.3.0.mm.3D_glc_m_Imc2 | log.sigma.3.0.mm.3D_glc_m_Imc1 | log.sigma.3.0.mm.3D_glc_m_DifferenceAverage | log.sigma.3.0.mm.3D_glc_m_Id |
|--------------------------------------|--------------------------------|--------------------------------|---------------------------------------------|------------------------------|
| 45.90520627                          | 0.808458298                    | -0.12353657                    | 4.201638096                                 | 0.337312736                  |
| 22.32903193                          | 0.805162608                    | -0.155173677                   | 2.095018135                                 | 0.46273078                   |
| 24.96790494                          | 0.833831166                    | -0.163486664                   | 2.231199279                                 | 0.455920267                  |
| 35.81199226                          | 0.864054023                    | -0.164807844                   | 3.434525695                                 | 0.368842364                  |
| 32.76523402                          | 0.760129504                    | -0.114236561                   | 2.775683986                                 | 0.408598346                  |
| 26.17538152                          | 0.891218783                    | -0.199222368                   | 3.056542994                                 | 0.383888539                  |
| 39.93000601                          | 0.751207857                    | -0.111992699                   | 2.655058803                                 | 0.416218564                  |
| 44.41684009                          | 0.766117883                    | -0.117940979                   | 2.602135732                                 | 0.422239051                  |
| 44.61046672                          | 0.746732711                    | -0.106894915                   | 3.016916073                                 | 0.392408827                  |
| 43.2528026                           | 0.839320352                    | -0.1557204                     | 2.835396894                                 | 0.393606973                  |
| 25.35992814                          | 0.75057856                     | -0.120504892                   | 2.354691409                                 | 0.429927008                  |
| 39.18203007                          | 0.781196642                    | -0.121409884                   | 2.92140419                                  | 0.394341245                  |
| 34.35900544                          | 0.849922587                    | -0.187493531                   | 2.002091973                                 | 0.508241509                  |
| 47.45421777                          | 0.845903604                    | -0.155770276                   | 3.159613009                                 | 0.395166364                  |
| 41.54832756                          | 0.786619127                    | -0.121097676                   | 3.50662842                                  | 0.371409001                  |
| 35.61612649                          | 0.765374697                    | -0.117098229                   | 2.862804831                                 | 0.407742597                  |
| 30.85944723                          | 0.783379227                    | -0.125728483                   | 2.943023777                                 | 0.391227339                  |
| 21.65204036                          | 0.824203396                    | -0.164939596                   | 2.169973305                                 | 0.466203969                  |
| 23.05771295                          | 0.759896302                    | -0.129857223                   | 2.045309447                                 | 0.46341599                   |
| 36.48070724                          | 0.755462422                    | -0.111650473                   | 2.780270262                                 | 0.399800967                  |
| 27.36906681                          | 0.809234493                    | -0.15963488                    | 1.823151473                                 | 0.503185527                  |
| 22.04856922                          | 0.769628452                    | -0.127291911                   | 2.310809288                                 | 0.422656618                  |
| 25.65728309                          | 0.818486669                    | -0.153496504                   | 2.384396036                                 | 0.435907969                  |
| 28.27838216                          | 0.751068877                    | -0.115533309                   | 2.460538196                                 | 0.428368631                  |
| 38.89883409                          | 0.801085744                    | -0.13823157                    | 2.913265993                                 | 0.402161089                  |
| 46.75992064                          | 0.817359832                    | -0.137803666                   | 3.346234215                                 | 0.367604011                  |
| 37.9855157                           | 0.789542003                    | -0.121967515                   | 3.275686036                                 | 0.382811355                  |
| 38.95765672                          | 0.739916348                    | -0.106826097                   | 2.793876689                                 | 0.4100546                    |
| 21.70183112                          | 0.835108494                    | -0.171103592                   | 2.187655042                                 | 0.430220661                  |
| 29.83148213                          | 0.761586906                    | -0.127063565                   | 2.15824225                                  | 0.456546295                  |
| 40.13131374                          | 0.748024854                    | -0.111295025                   | 2.711310987                                 | 0.418728916                  |
| 37.1218253                           | 0.717475289                    | -0.106031764                   | 2.511296714                                 | 0.445485718                  |
| 38.24008296                          | 0.776247053                    | -0.115156461                   | 3.354243409                                 | 0.372717531                  |
| 37.59260323                          | 0.791576422                    | -0.127063121                   | 3.055589095                                 | 0.398308984                  |
| 33.53976013                          | 0.736569597                    | -0.10340853                    | 2.848659788                                 | 0.393705786                  |
| 38.31355586                          | 0.772847466                    | -0.12821953                    | 2.442432276                                 | 0.438512568                  |
| 49.75727711                          | 0.778871654                    | -0.130721157                   | 2.533760874                                 | 0.452883714                  |
| 46.88540077                          | 0.850376358                    | -0.167389639                   | 2.743892147                                 | 0.455355022                  |
| 24.42730435                          | 0.639101435                    | -0.085459821                   | 2.037996129                                 | 0.458377012                  |
| 32.67637833                          | 0.740181642                    | -0.101477868                   | 3.114692801                                 | 0.37463426                   |
| 35.60516297                          | 0.759782111                    | -0.117298591                   | 2.779322937                                 | 0.425620871                  |
| 36.10909571                          | 0.738008991                    | -0.096587074                   | 3.819637149                                 | 0.33031161                   |
| 37.09484977                          | 0.733416418                    | -0.102205769                   | 3.118431709                                 | 0.378421006                  |
| 44.53155898                          | 0.75715514                     | -0.109575294                   | 3.262033162                                 | 0.382074142                  |
| 26.01278194                          | 0.810309365                    | -0.146797921                   | 2.45706388                                  | 0.422493545                  |
| 39.34245283                          | 0.772303248                    | -0.11742739                    | 2.984280774                                 | 0.393503398                  |
| 38.19681697                          | 0.72009779                     | -0.10109395                    | 2.733208273                                 | 0.409323351                  |
| 19.72228267                          | 0.817657524                    | -0.168741291                   | 1.818584875                                 | 0.483336186                  |
| 27.65825803                          | 0.845738592                    | -0.159833792                   | 2.881162251                                 | 0.3899534                    |
| 22.68301744                          | 0.842147829                    | -0.180464877                   | 2.077788353                                 | 0.475445357                  |
| 39.94815576                          | 0.753220248                    | -0.107689895                   | 3.164958913                                 | 0.372097384                  |
| 33.90730726                          | 0.723711871                    | -0.092641991                   | 3.582366245                                 | 0.345094071                  |
| 29.38711436                          | 0.712464237                    | -0.098279758                   | 2.625375225                                 | 0.409068899                  |
| 22.44092162                          | 0.788843989                    | -0.13180846                    | 2.750495433                                 | 0.396541246                  |
| 29.67180702                          | 0.812623378                    | -0.140724426                   | 2.826645479                                 | 0.394074615                  |
| 47.05463194                          | 0.782844648                    | -0.129984388                   | 2.632302967                                 | 0.417479527                  |
| 36.69794094                          | 0.715992441                    | -0.093914355                   | 3.150539063                                 | 0.373600696                  |
| 40.24837579                          | 0.765207887                    | -0.118182189                   | 2.751674424                                 | 0.418550301                  |
| 32.39285403                          | 0.734279028                    | -0.10559505                    | 2.824264888                                 | 0.403114956                  |
| 44.03282208                          | 0.739340828                    | -0.102653803                   | 3.013344712                                 | 0.410441623                  |
| 31.48993977                          | 0.819563301                    | -0.15305301                    | 2.39248099                                  | 0.458839587                  |
| 38.54105369                          | 0.754773086                    | -0.113359746                   | 2.677311855                                 | 0.408450956                  |
| 42.86178926                          | 0.738209619                    | -0.10232658                    | 2.946930846                                 | 0.397079888                  |
| 44.55254848                          | 0.769338133                    | -0.121773333                   | 2.664845562                                 | 0.415470059                  |
| 22.64046427                          | 0.798050718                    | -0.146746005                   | 2.319826177                                 | 0.430280006                  |
| 42.2958744                           | 0.781551648                    | -0.128828793                   | 2.501360433                                 | 0.445068504                  |
| 35.45428003                          | 0.756827166                    | -0.129995645                   | 2.081623736                                 | 0.486245724                  |
| 44.08060398                          | 0.758981499                    | -0.112483586                   | 2.895090485                                 | 0.408211255                  |
| 44.21838711                          | 0.743984042                    | -0.108537017                   | 2.735262517                                 | 0.41100399                   |
| 29.43239738                          | 0.733706792                    | -0.118956777                   | 2.027773001                                 | 0.471060903                  |
| 35.06049507                          | 0.813134635                    | -0.143791156                   | 2.731499902                                 | 0.407157699                  |
| 40.93846192                          | 0.804488434                    | -0.135854371                   | 2.581325089                                 | 0.424337983                  |
| 43.78260651                          | 0.788842341                    | -0.127723279                   | 2.860700002                                 | 0.408729972                  |
| 37.20474713                          | 0.729892377                    | -0.094499702                   | 3.87243773                                  | 0.342355745                  |
| 32.31321306                          | 0.756200335                    | -0.106780873                   | 3.346741721                                 | 0.358591787                  |
| 36.455863                            | 0.795098686                    | -0.138595295                   | 2.621821531                                 | 0.432218076                  |
| 26.22585708                          | 0.74756885                     | -0.125608738                   | 1.9957395                                   | 0.47346056                   |
| 27.59648732                          | 0.8668226                      | -0.190967502                   | 2.201465969                                 | 0.455036336                  |
| 27.35998343                          | 0.753759859                    | -0.118961801                   | 2.351431165                                 | 0.433736254                  |
| 42.62279076                          | 0.795225936                    | -0.120939396                   | 3.703332861                                 | 0.350481118                  |
| 43.8614892                           | 0.822013734                    | -0.131259783                   | 4.083621358                                 | 0.344513124                  |
| 26.78907798                          | 0.765649092                    | -0.117456009                   | 2.896993492                                 | 0.415554614                  |
| 38.30772305                          | 0.761489077                    | -0.119788354                   | 2.776950376                                 | 0.417909242                  |
| 28.88376197                          | 0.748385508                    | -0.122674877                   | 2.181937618                                 | 0.444441482                  |
| 33.41228236                          | 0.778895171                    | -0.118991933                   | 3.230471575                                 | 0.370419485                  |
| 28.68586361                          | 0.829637445                    | -0.1827145                     | 1.592842277                                 | 0.520897652                  |
| 38.86969268                          | 0.771985808                    | -0.116289872                   | 3.39244203                                  | 0.386533445                  |
| 29.61124409                          | 0.807601228                    | -0.139235342                   | 2.528226363                                 | 0.42868295                   |
| 30.05133329                          | 0.812567625                    | -0.149186701                   | 2.3515455                                   | 0.442412218                  |
| 37.5110499                           | 0.795582435                    | -0.14005969                    | 2.360649434                                 | 0.445761599                  |
| 19.5167774                           | 0.837689936                    | -0.193120507                   | 1.754575738                                 | 0.515692884                  |
| 32.04176367                          | 0.774861244                    | -0.11459568                    | 3.161443206                                 | 0.371192911                  |
| 39.56155037                          | 0.699396731                    | -0.088905212                   | 3.110207439                                 | 0.384753314                  |
| 38.32529665                          | 0.74189321                     | -0.110512512                   | 2.730546714                                 | 0.413593385                  |
| 33.80704985                          | 0.685793223                    | -0.086610377                   | 2.92387867                                  | 0.386508355                  |
| 45.28841316                          | 0.830664727                    | -0.147601731                   | 2.920881474                                 | 0.421397361                  |
| 28.25696991                          | 0.791115873                    | -0.129632375                   | 2.580560316                                 | 0.414087641                  |
| 36.14084214                          | 0.844175197                    | -0.170556594                   | 2.499628306                                 | 0.453647323                  |
| 27.60451471                          | 0.788178275                    | -0.146197387                   | 2.055512311                                 | 0.465661232                  |
| 32.47308293                          | 0.733186627                    | -0.111255678                   | 2.388470068                                 | 0.447918015                  |

| log.sigma.3.0.mm.3D_glcm_ClusterTendency | log.sigma.3.0.mm.3D_firstorder_InterquartileRange | log.sigma.3.0.mm.3D_firstorder_Skewness | log.sigma.3.0.mm.3D_firstorder_Uniformity |
|------------------------------------------|---------------------------------------------------|-----------------------------------------|-------------------------------------------|
| 98.17933459                              | 146.7920866                                       | -0.913243089                            | 0.060222737                               |
| 29.90848442                              | 85.42516518                                       | 0.52509398                              | 0.109542738                               |
| 41.03584269                              | 117.7910242                                       | 0.149252612                             | 0.081682642                               |
| 74.09906919                              | 155.609787                                        | -0.474603674                            | 0.062612032                               |
| 47.17372648                              | 109.4847803                                       | -0.369467159                            | 0.081443814                               |
| 67.61127191                              | 141.534787                                        | 0.512910747                             | 0.07161157                                |
| 50.23144444                              | 118.8615019                                       | 0.2406016                               | 0.079041483                               |
| 50.15845393                              | 110.0706787                                       | 0.016722351                             | 0.082455607                               |
| 56.29886571                              | 134.7197056                                       | -0.232229963                            | 0.069215715                               |
| 54.06295017                              | 132.3462615                                       | -0.581224267                            | 0.072578456                               |
| 32.83998623                              | 100.0095775                                       | -0.139461448                            | 0.09026395                                |
| 55.75916572                              | 123.7678165                                       | -0.306386232                            | 0.075258257                               |
| 39.96412054                              | 67.36379814                                       | 0.073753204                             | 0.129473111                               |
| 70.16921967                              | 119.2831483                                       | -0.624847595                            | 0.075631706                               |
| 63.46139079                              | 111.6344974                                       | -0.49586897                             | 0.075690707                               |
| 54.14404401                              | 123.016408                                        | -0.054954428                            | 0.07455679                                |
| 48.413817                                | 125.7432852                                       | -0.738913218                            | 0.07804657                                |
| 38.00955849                              | 80.29811096                                       | 0.710253706                             | 0.105455607                               |
| 26.33735582                              | 89.89285171                                       | 0.34198176                              | 0.105745238                               |
| 55.50331376                              | 126.0147376                                       | 0.065375817                             | 0.071625734                               |
| 31.57766172                              | 85.58330464                                       | 0.319782497                             | 0.110205438                               |
| 31.91990132                              | 108.2508087                                       | 0.041871618                             | 0.088178479                               |
| 39.07795056                              | 102.3203253                                       | 0.172030552                             | 0.092496872                               |
| 38.44548246                              | 109.722868                                        | 0.186496574                             | 0.0846879                                 |
| 44.79622159                              | 116.4205647                                       | -0.330899422                            | 0.081022308                               |
| 76.87593545                              | 137.8655319                                       | -0.295138383                            | 0.064641232                               |
| 69.45531299                              | 123.7299604                                       | -0.267298381                            | 0.070213424                               |
| 44.3082681                               | 104.7502774                                       | -0.335519316                            | 0.085071213                               |
| 31.59839769                              | 108.585346                                        | 0.458208762                             | 0.098068656                               |
| 30.97693345                              | 84.64782286                                       | -0.298671886                            | 0.103375369                               |
| 48.14554792                              | 112.7820821                                       | -0.176318666                            | 0.081488649                               |
| 33.36576463                              | 69.82456183                                       | -1.163550364                            | 0.115311039                               |
| 71.46492223                              | 139.2131977                                       | -0.369009286                            | 0.063198075                               |
| 61.00818237                              | 124.6921617                                       | -0.684415599                            | 0.072297691                               |
| 50.41290663                              | 130.7877269                                       | -0.190065367                            | 0.071862567                               |
| 40.75374556                              | 107.8968487                                       | -0.212811703                            | 0.090612509                               |
| 45.37388399                              | 79.09515131                                       | -0.649759638                            | 0.10474835                                |
| 70.93936658                              | 116.6817664                                       | -0.168480293                            | 0.084288469                               |
| 17.47014912                              | 81.2544083                                        | -0.681622604                            | 0.121032454                               |
| 68.33059172                              | 153.6839857                                       | 0.061086513                             | 0.060616579                               |
| 48.1193802                               | 86.77168304                                       | -0.932033353                            | 0.095516966                               |
| 80.23184851                              | 159.8643284                                       | 0.24486247                              | 0.057825129                               |
| 53.91498209                              | 138.4236012                                       | -0.280510891                            | 0.067955876                               |
| 57.14129062                              | 116.252104                                        | -0.48698308                             | 0.076126177                               |
| 44.95767297                              | 110.190073                                        | 0.371135422                             | 0.084340507                               |
| 54.36099827                              | 125.7813721                                       | -0.213492349                            | 0.072362202                               |
| 45.42889923                              | 109.4148369                                       | 0.078452474                             | 0.081793905                               |
| 26.00593651                              | 85.71301651                                       | 0.528725436                             | 0.112689665                               |
| 51.84128343                              | 121.9068077                                       | -0.227741083                            | 0.073712961                               |
| 41.22402949                              | 119.7466118                                       | 0.642107879                             | 0.094985295                               |
| 55.99004587                              | 135.8635387                                       | -0.50150054                             | 0.068369294                               |
| 65.3540761                               | 146.2205958                                       | 0.005620759                             | 0.062767822                               |
| 42.67533607                              | 104.8120249                                       | -0.036407163                            | 0.083361725                               |
| 42.18826798                              | 128.9385853                                       | 0.401470354                             | 0.0784056                                 |
| 52.56077383                              | 146.4911618                                       | 0.209463835                             | 0.07093674                                |
| 43.46916216                              | 96.3323226                                        | -0.489478248                            | 0.088958317                               |
| 55.91874224                              | 97.2782669                                        | -0.334740025                            | 0.067016705                               |
| 51.22756341                              | 97.29222858                                       | -0.896898898                            | 0.087295083                               |
| 38.47904714                              | 99.76639676                                       | -0.495488738                            | 0.088073805                               |
| 58.2936049                               | 131.0819302                                       | 0.282918335                             | 0.071265849                               |
| 44.16454122                              | 85.00959253                                       | 0.725808998                             | 0.100420168                               |
| 44.9657244                               | 118.3351293                                       | -0.213324194                            | 0.08005639                                |
| 56.81085358                              | 127.0776596                                       | -0.18260687                             | 0.074517253                               |
| 56.7465917                               | 115.1858611                                       | 0.294051059                             | 0.076698178                               |
| 32.7482617                               | 113.2664323                                       | 0.181533584                             | 0.085374139                               |
| 47.08388299                              | 94.39972705                                       | -0.302002346                            | 0.095014671                               |
| 24.35142074                              | 65.14671216                                       | -0.846711735                            | 0.130276356                               |
| 59.41215662                              | 106.4047632                                       | -0.137013944                            | 0.078894899                               |
| 50.70875568                              | 118.8077221                                       | -0.52674982                             | 0.075217387                               |
| 27.42722676                              | 90.6710124                                        | -0.082835887                            | 0.103227709                               |
| 46.94518636                              | 113.0951927                                       | -0.533564966                            | 0.082248973                               |
| 54.97721999                              | 120.3583608                                       | -0.058029473                            | 0.078861993                               |
| 52.81387926                              | 110.9036617                                       | -0.904143755                            | 0.081421245                               |
| 69.4049063                               | 148.6203861                                       | -0.550935996                            | 0.062510276                               |
| 66.882742                                | 150.8557262                                       | 0.23275208                              | 0.061858517                               |
| 44.82160022                              | 93.89180183                                       | -1.322527467                            | 0.095885315                               |
| 27.56834848                              | 88.82417393                                       | 0.215690892                             | 0.101834304                               |
| 44.65319547                              | 95.6452167                                        | 0.416712427                             | 0.096218636                               |
| 33.73865881                              | 95.86052847                                       | -0.015092886                            | 0.092513716                               |
| 89.76677312                              | 143.7753563                                       | -0.824750034                            | 0.064172193                               |
| 98.70626657                              | 141.8891239                                       | -0.93480842                             | 0.06113539                                |
| 44.0735901                               | 98.8848505                                        | -0.03450472                             | 0.085320391                               |
| 46.81864585                              | 117.1352625                                       | -0.127273954                            | 0.080113053                               |
| 35.514965                                | 97.98526192                                       | -0.538509331                            | 0.093011373                               |
| 66.1827936                               | 137.8666539                                       | -0.262241368                            | 0.065030281                               |
| 26.75215674                              | 70.86911607                                       | 0.424879547                             | 0.125112483                               |
| 67.92962008                              | 122.5210533                                       | -0.835709486                            | 0.0720789                                 |
| 51.33067736                              | 131.0921736                                       | 0.01095591                              | 0.076984648                               |
| 40.52685392                              | 101.7508512                                       | -0.275872641                            | 0.0893549                                 |
| 40.70177103                              | 95.8112793                                        | -0.562757344                            | 0.090885414                               |
| 33.23090623                              | 91.27370906                                       | 0.948593395                             | 0.127513503                               |
| 63.58344682                              | 134.8411484                                       | 0.04167535                              | 0.065611735                               |
| 53.44125749                              | 115.9686995                                       | -0.68096051                             | 0.075360688                               |
| 45.86263119                              | 106.5220604                                       | -0.460020482                            | 0.083002755                               |
| 46.81247863                              | 125.0278602                                       | -0.444236609                            | 0.075175988                               |
| 69.29485815                              | 120.2114501                                       | -0.532847148                            | 0.075810899                               |
| 52.05369995                              | 122.4440384                                       | -0.003493481                            | 0.075068216                               |
| 49.84712715                              | 79.77847338                                       | -1.362673963                            | 0.104816691                               |
| 26.27954146                              | 84.31397796                                       | -0.632242191                            | 0.107997056                               |
| 39.34497913                              | 107.7627637                                       | 0.374103233                             | 0.092509283                               |

| log.sigma.3.0.mm.3D_firstorder_MeanAbsoluteDeviation | log.sigma.3.0.mm.3D_firstorder_Energy | log.sigma.3.0.mm.3D_firstorder_RobustMeanAbsoluteDeviation | log.sigma.3.0.mm.3D_firstorder_Median |
|------------------------------------------------------|---------------------------------------|------------------------------------------------------------|---------------------------------------|
| 103.9195743                                          | 45548121.39                           | 64.57486715                                                | 56.41321373                           |
| 58.88620268                                          | 10148274.48                           | 36.17092746                                                | 55.74443436                           |
| 71.55297293                                          | 21830638.77                           | 48.47183431                                                | 68.73027039                           |
| 97.2999506                                           | 16351939.39                           | 65.88098052                                                | 51.36367416                           |
| 72.7135028                                           | 27855290.2                            | 46.17411935                                                | 49.2592926                            |
| 90.18940236                                          | 12056180.35                           | 60.18228571                                                | 49.95099449                           |
| 77.10665589                                          | 82716934.09                           | 50.88234699                                                | 54.79553986                           |
| 76.69604435                                          | 82163732.86                           | 48.4794672                                                 | 61.69963837                           |
| 82.41970641                                          | 76287776.14                           | 55.83036272                                                | 75.7438736                            |
| 80.34096302                                          | 19253186.94                           | 54.26631845                                                | 81.73307037                           |
| 64.17519903                                          | 14651679.59                           | 43.20301214                                                | 50.12731552                           |
| 81.97456093                                          | 43234542.35                           | 53.58918846                                                | 74.77468872                           |
| 58.87000403                                          | 17746309.86                           | 31.01887185                                                | 30.73645973                           |
| 84.57271988                                          | 30160929.83                           | 50.48942447                                                | 53.41445541                           |
| 83.46597786                                          | 33845014.75                           | 49.8218533                                                 | 65.46077728                           |
| 82.09527806                                          | 66289597.77                           | 54.00605189                                                | 49.83741951                           |
| 78.0259144                                           | 14895522.61                           | 51.92288393                                                | 65.59177399                           |
| 63.9221104                                           | 13271053.66                           | 38.77347926                                                | 41.5622406                            |
| 57.45186134                                          | 10361576.71                           | 38.75727824                                                | 40.74809456                           |
| 82.95603375                                          | 90074223.03                           | 54.47449466                                                | 65.62826538                           |
| 59.16892163                                          | 29039175.66                           | 37.06808133                                                | 45.25657082                           |
| 64.58632045                                          | 11734529.71                           | 44.82369958                                                | 60.2468605                            |
| 67.96664501                                          | 12086806.13                           | 42.99994828                                                | 50.6027298                            |
| 68.80617877                                          | 31564023.75                           | 45.9500672                                                 | 56.87274933                           |
| 76.33817278                                          | 21037000.31                           | 48.61911829                                                | 68.48974609                           |
| 92.64134399                                          | 52836423.51                           | 58.50691276                                                | 79.98931885                           |
| 89.25034157                                          | 62577965.39                           | 54.45065152                                                | 63.46143341                           |
| 71.76243844                                          | 33933048.8                            | 44.61222517                                                | 48.34454727                           |
| 63.23282014                                          | 4499923.119                           | 44.36505344                                                | 46.57966232                           |
| 58.04515471                                          | 21143983.1                            | 35.94180562                                                | 64.01677322                           |
| 75.5172616                                           | 71983599.81                           | 48.47662045                                                | 61.96547699                           |
| 58.59653295                                          | 16853676.95                           | 32.04020262                                                | 33.08096695                           |
| 94.03978184                                          | 54673622.58                           | 61.74066874                                                | 53.52703476                           |
| 85.34768969                                          | 38981386.44                           | 54.30498468                                                | 61.68148613                           |
| 80.45149731                                          | 79017866.93                           | 55.02672147                                                | 82.71992493                           |
| 70.98966335                                          | 41056999.26                           | 46.2349201                                                 | 57.70758057                           |
| 65.05244033                                          | 40296163.63                           | 35.15446335                                                | 33.352108                             |
| 85.16082145                                          | 83205723.62                           | 52.57267323                                                | 37.42066574                           |
| 48.28236995                                          | 6926960.038                           | 33.16523846                                                | 46.30999374                           |
| 92.71280862                                          | 114123093.9                           | 64.22010998                                                | 44.66346741                           |
| 70.59755321                                          | 29164541.66                           | 39.25400695                                                | 41.81946945                           |
| 99.32139004                                          | 69678986.87                           | 67.14628304                                                | 41.12604523                           |
| 84.20920711                                          | 63165131.42                           | 57.38845889                                                | 74.33369446                           |
| 80.09417238                                          | 35179001.68                           | 49.94028518                                                | 57.79608727                           |
| 73.83116102                                          | 22873296.77                           | 48.19646021                                                | 78.62030029                           |
| 81.6362209                                           | 50460907.94                           | 52.7554818                                                 | 78.76181793                           |
| 75.64793191                                          | 69138115.64                           | 47.86085486                                                | 59.17946434                           |
| 55.64014243                                          | 8023264.948                           | 35.59982024                                                | 51.11087036                           |
| 79.56803467                                          | 12691680.38                           | 52.3334207                                                 | 69.31025696                           |
| 71.89252003                                          | 18658842.67                           | 50.18364422                                                | 52.52007484                           |
| 86.27928942                                          | 53561982.03                           | 57.56612127                                                | 87.96469879                           |
| 91.20474156                                          | 59848916.19                           | 60.93718449                                                | 62.89406967                           |
| 70.21290255                                          | 52387512.06                           | 45.22024407                                                | 52.48421288                           |
| 75.6029824                                           | 19520251.72                           | 52.35468654                                                | 80.40045166                           |
| 83.23852595                                          | 23054655.51                           | 60.12646745                                                | 68.35902786                           |
| 68.79851537                                          | 24071829.58                           | 41.94691357                                                | 57.12143135                           |
| 85.62080361                                          | 70297609.57                           | 57.23452113                                                | 73.19095612                           |
| 73.37759523                                          | 44557503.66                           | 42.51310078                                                | 49.36827469                           |
| 68.88475937                                          | 17165092.21                           | 42.40263823                                                | 44.60989189                           |
| 83.39808249                                          | 120836891.6                           | 56.21416057                                                | 36.5581131                            |
| 69.8097248                                           | 22543076.58                           | 40.62458265                                                | 41.83430099                           |
| 75.06344095                                          | 39130919.36                           | 50.49246971                                                | 63.30675316                           |
| 82.00139924                                          | 102559555.7                           | 54.67346791                                                | 68.4588089                            |
| 79.49202154                                          | 106681072.2                           | 50.53914553                                                | 42.2296524                            |
| 67.83986763                                          | 10075202.05                           | 47.17296022                                                | 68.33010864                           |
| 69.62825706                                          | 46659632.03                           | 41.19345973                                                | 38.38228989                           |
| 49.80990112                                          | 8076681.599                           | 28.16468877                                                | 29.69340706                           |
| 78.62364015                                          | 84825955.86                           | 47.24196043                                                | 43.86502647                           |
| 78.69969496                                          | 86888341.1                            | 50.37461325                                                | 68.24833679                           |
| 58.34361975                                          | 26502521.74                           | 38.33631678                                                | 49.52166557                           |
| 72.78941095                                          | 15625993.21                           | 46.85553444                                                | 48.85412979                           |
| 80.00483851                                          | 76476161.85                           | 51.73777997                                                | 68.3246727                            |
| 76.80197551                                          | 35549106.97                           | 46.93954483                                                | 66.14527893                           |
| 97.87308254                                          | 37855018.89                           | 64.61806179                                                | 46.34937668                           |
| 92.27944686                                          | 49271523.64                           | 62.66758795                                                | 36.91590881                           |
| 67.6417613                                           | 14700899.23                           | 40.3464139                                                 | 60.12298775                           |
| 58.39950756                                          | 24898879.54                           | 37.5362511                                                 | 59.76226997                           |
| 68.28169655                                          | 11613030.74                           | 41.90501232                                                | 45.24749947                           |
| 64.64221464                                          | 18170293.84                           | 41.86537257                                                | 51.3262825                            |
| 100.497772                                           | 42139749.44                           | 64.52428066                                                | 51.84906006                           |
| 103.7962306                                          | 42959598.64                           | 63.81189095                                                | 56.29119873                           |
| 73.22622948                                          | 19401276.55                           | 44.10653122                                                | 29.80688095                           |
| 76.3829268                                           | 47268236.14                           | 49.58355173                                                | 58.12091064                           |
| 63.39683949                                          | 29021419.37                           | 41.10302572                                                | 56.651474                             |
| 89.3092719                                           | 40307096                              | 59.12501556                                                | 60.2491188                            |
| 52.90356412                                          | 11327535.38                           | 32.61923711                                                | 35.78318214                           |
| 88.74118203                                          | 36195618.16                           | 53.52717419                                                | 37.67953491                           |
| 80.35724319                                          | 49294759.69                           | 54.89108263                                                | 72.03277588                           |
| 67.85296777                                          | 18789376.22                           | 43.43524937                                                | 63.11332893                           |
| 68.04628055                                          | 24725415.17                           | 41.34117537                                                | 55.67512894                           |
| 64.42624659                                          | 13327571.64                           | 42.7882753                                                 | 32.29890442                           |
| 87.05778593                                          | 46557650.58                           | 59.06155036                                                | 80.28959274                           |
| 79.95207761                                          | 68509673.92                           | 49.87931988                                                | 45.74972916                           |
| 73.23025166                                          | 48230892.51                           | 46.05120744                                                | 66.63674545                           |
| 77.52562689                                          | 48060030.13                           | 52.37012118                                                | 45.52788734                           |
| 85.68312733                                          | 59401763.23                           | 52.89827333                                                | 51.94076347                           |
| 78.13196825                                          | 34651457.24                           | 51.27219334                                                | 49.01515579                           |
| 67.44945484                                          | 10260627.29                           | 36.43808189                                                | 26.23974991                           |
| 54.86742078                                          | 5353799.493                           | 35.35922004                                                | 43.18123436                           |
| 70.26482553                                          | 75477208.98                           | 46.40881532                                                | 52.22208405                           |

| log.sigma.3.0.mm.3D_firstorder_TotalEnergy | log.sigma.3.0.mm.3D_firstorder_Maximum | log.sigma.3.0.mm.3D_firstorder_RootMeanSquared | log.sigma.3.0.mm.3D_firstorder_90Percentile | log.sigma.3.0.mm.3D_firstorder_Minimum |
|--------------------------------------------|----------------------------------------|------------------------------------------------|---------------------------------------------|----------------------------------------|
| 1229799278                                 | 404.5023193                            | 146.5084066                                    | 202.3849045                                 | -500.2509766                           |
| 274003410.9                                | 341.6274719                            | 104.1814259                                    | 176.0366241                                 | -196.1173248                           |
| 589427246.8                                | 415.8430786                            | 119.2945331                                    | 194.7475586                                 | -215.2949677                           |
| 441502363.6                                | 383.3768005                            | 129.3711243                                    | 184.4826813                                 | -389.0366211                           |
| 752092835.4                                | 336.2234802                            | 108.4583504                                    | 170.4152008                                 | -342.2017212                           |
| 325516869.5                                | 451.8030701                            | 135.1552438                                    | 241.2072296                                 | -244.4421844                           |
| 2233357220                                 | 579.2668457                            | 120.9858446                                    | 202.4430389                                 | -202.2584839                           |
| 2218420787                                 | 467.6286316                            | 126.8278519                                    | 212.6474564                                 | -471.0213928                           |
| 2059769956                                 | 455.1578674                            | 129.5426455                                    | 207.17202                                   | -461.5364075                           |
| 519836047.3                                | 392.5494385                            | 134.0151575                                    | 217.9110168                                 | -443.2217102                           |
| 395595348.9                                | 291.9234924                            | 98.5696094                                     | 164.8836456                                 | -242.6888275                           |
| 1167332644                                 | 433.8617859                            | 136.9556547                                    | 224.8693054                                 | -383.374176                            |
| 479150366.2                                | 367.5284119                            | 97.49489393                                    | 146.3517883                                 | -358.3380127                           |
| 814345105.3                                | 413.1419678                            | 132.5370243                                    | 202.8105835                                 | -522.1710205                           |
| 913815398.3                                | 541.2356567                            | 130.6100272                                    | 193.3346695                                 | -430.3246765                           |
| 1789819140                                 | 425.822113                             | 125.0790216                                    | 205.5016632                                 | -363.89151                             |
| 402179110.6                                | 348.5778503                            | 111.6929365                                    | 160.4895218                                 | -317.910614                            |
| 358318448.9                                | 349.9364624                            | 103.745953                                     | 190.5691345                                 | -187.340332                            |
| 279762571.2                                | 295.4604492                            | 89.34609527                                    | 156.4045151                                 | -206.8579559                           |
| 2432004022                                 | 459.8383789                            | 131.6255969                                    | 221.4924866                                 | -350.3973083                           |
| 784057742.8                                | 390.0675049                            | 97.99439782                                    | 166.7976654                                 | -250.1364288                           |
| 316832302.3                                | 286.4005127                            | 104.2850664                                    | 173.8077606                                 | -190.6666107                           |
| 326343765.6                                | 386.9621582                            | 108.6440132                                    | 188.0357361                                 | -237.6629333                           |
| 852228641.1                                | 416.3435974                            | 129.199138                                     | 181.4377625                                 | -273.4483948                           |
| 567999008.3                                | 458.951355                             | 128.5516646                                    | 207.4706055                                 | -390.0658264                           |
| 1426583435                                 | 534.8945313                            | 149.3427609                                    | 231.7289185                                 | -476.2721558                           |
| 1689605066                                 | 544.2665405                            | 139.1258616                                    | 212.6329987                                 | -389.1066284                           |
| 916192317.7                                | 407.9126282                            | 110.8407878                                    | 175.2595673                                 | -423.3310242                           |
| 121497924.2                                | 294.1412659                            | 100.3341522                                    | 182.1260864                                 | -186.4705353                           |
| 570887543.7                                | 341.0658569                            | 101.4596084                                    | 155.7649704                                 | -291.2584839                           |
| 1943557195                                 | 435.9596252                            | 122.9998443                                    | 199.1908539                                 | -416.3695068                           |
| 455049277.7                                | 334.6472778                            | 90.25413063                                    | 111.2646088                                 | -420.9969788                           |
| 1476187810                                 | 436.5235901                            | 130.1232503                                    | 193.4872833                                 | -412.9362183                           |
| 1052497434                                 | 362.0513                               | 128.7937266                                    | 196.5709885                                 | -396.7625427                           |
| 2133482407                                 | 509.919342                             | 133.948852                                     | 218.1596542                                 | -318.0326233                           |
| 1108538980                                 | 414.7380676                            | 117.0052556                                    | 196.3057709                                 | -391.976593                            |
| 1087996418                                 | 486.3632202                            | 104.0643595                                    | 140.22052                                   | -573.9535522                           |
| 2246554538                                 | 521.0042114                            | 126.9725002                                    | 207.5151672                                 | -514.5535278                           |
| 187027921                                  | 231.9655914                            | 75.0448566                                     | 111.7212654                                 | -243.5847015                           |
| 3081323535                                 | 444.2929077                            | 125.2909098                                    | 197.6589706                                 | -328.1545105                           |
| 787442624.9                                | 393.1696472                            | 106.033767                                     | 133.9532852                                 | -386.4071655                           |
| 1881332645                                 | 554.1220703                            | 134.2344005                                    | 195.4121429                                 | -387.2310486                           |
| 1705458548                                 | 414.766571                             | 131.4964008                                    | 213.4054413                                 | -368.3927612                           |
| 949833045.3                                | 526.3787842                            | 118.9095039                                    | 167.3001663                                 | -475.5657349                           |
| 617579012.8                                | 440.4916077                            | 133.7823916                                    | 204.3540176                                 | -218.9632416                           |
| 1362444514                                 | 426.4898376                            | 135.5833486                                    | 214.0698975                                 | -376.4992371                           |
| 1866729122                                 | 469.5866394                            | 123.106541                                     | 200.8253555                                 | -389.4930115                           |
| 216628153.6                                | 305.3111877                            | 95.97684941                                    | 159.9003448                                 | -160.7104492                           |
| 342675370.2                                | 344.6506042                            | 122.1222461                                    | 191.0677338                                 | -254.0369873                           |
| 503788752.1                                | 439.7142334                            | 117.4773133                                    | 199.8547073                                 | -189.354599                            |
| 1446173515                                 | 411.0914612                            | 144.3930425                                    | 228.4403137                                 | -387.7217102                           |
| 1615920737                                 | 548.0421753                            | 133.2443396                                    | 208.7513885                                 | -337.8738403                           |
| 1414462825                                 | 440.6134949                            | 107.7529928                                    | 175.5904099                                 | -298.9541931                           |
| 527046796.4                                | 421.238678                             | 132.9713782                                    | 225.9889999                                 | -172.1426849                           |
| 622475698.8                                | 389.391571                             | 131.6598931                                    | 223.4416626                                 | -265.6196594                           |
| 649939398.7                                | 431.6274414                            | 111.1059314                                    | 178.5914688                                 | -501.5198364                           |
| 1898035458                                 | 376.8646545                            | 133.8290176                                    | 209.5799072                                 | -352.8514404                           |
| 1203052599                                 | 405.2653503                            | 113.5136089                                    | 158.7529663                                 | -428.0719604                           |
| 463457489.7                                | 347.2671204                            | 102.0573922                                    | 150.6201233                                 | -347.2292786                           |
| 3262596074                                 | 445.1760864                            | 115.0504096                                    | 177.1837677                                 | -484.6817627                           |
| 608663067.8                                | 525.2113647                            | 112.9825165                                    | 191.6041641                                 | -308.1778564                           |
| 1056534823                                 | 411.0186157                            | 121.0610385                                    | 201.9529083                                 | -395.8535461                           |
| 2769108005                                 | 438.5091858                            | 133.1025239                                    | 221.6480042                                 | -442.9143677                           |
| 2880388948                                 | 450.2845459                            | 118.2989053                                    | 203.1084534                                 | -492.1632385                           |
| 272030455.2                                | 327.1648513                            | 112.9310423                                    | 183.6806656                                 | -177.6009064                           |
| 1259810065                                 | 432.0230408                            | 109.9169123                                    | 172.6931763                                 | -463.1314087                           |
| 218070403.2                                | 310.413208                             | 78.70053515                                    | 108.383181                                  | -380.5997009                           |
| 2290300808                                 | 536.65448                              | 116.4995834                                    | 171.6271835                                 | -497.8594971                           |
| 2345985210                                 | 495.8709412                            | 121.7988368                                    | 185.2572113                                 | -465.3862305                           |
| 715568086.9                                | 301.3717651                            | 95.63005579                                    | 159.8196381                                 | -287.3802185                           |
| 421901816.7                                | 341.2979126                            | 109.6779287                                    | 169.8922913                                 | -356.7473145                           |
| 2064856370                                 | 495.3954773                            | 133.5163329                                    | 222.8559357                                 | -401.024292                            |
| 959825888.1                                | 396.3827515                            | 124.8941754                                    | 184.5929718                                 | -468.839325                            |
| 1022085510                                 | 380.3687439                            | 129.450466                                     | 178.3525635                                 | -424.9251709                           |
| 1330331138                                 | 466.3070679                            | 125.4458973                                    | 196.4701538                                 | -326.3911438                           |
| 396924279.2                                | 264.2732849                            | 104.6636057                                    | 145.1000778                                 | -397.1747131                           |
| 672269747.5                                | 355.1312866                            | 101.940438                                     | 168.8022995                                 | -246.3983459                           |
| 313551830.1                                | 378.278595                             | 110.1006881                                    | 175.7967697                                 | -256.1995239                           |
| 490597933.7                                | 366.5587158                            | 103.1725619                                    | 175.8167267                                 | -256.0227966                           |
| 1137773235                                 | 446.0644226                            | 134.2242122                                    | 164.166571                                  | -482.2111816                           |
| 1159909163                                 | 404.5023193                            | 146.9645929                                    | 200.6963745                                 | -482.6848755                           |
| 523834466.9                                | 536.8029785                            | 103.848343                                     | 131.9404236                                 | -289.6785583                           |
| 1276242376                                 | 437.3031006                            | 120.2478273                                    | 193.4257721                                 | -396.1162415                           |
| 783578323                                  | 298.1611633                            | 97.18025725                                    | 147.3388977                                 | -288.2420654                           |
| 1088291592                                 | 495.4663391                            | 128.5537811                                    | 200.2966217                                 | -339.9137878                           |
| 305843455.1                                | 261.0871887                            | 85.98809566                                    | 155.9007324                                 | -281.6944275                           |
| 977281690.3                                | 334.5190735                            | 123.1923691                                    | 158.4612915                                 | -437.5036621                           |
| 1330958512                                 | 396.6116028                            | 134.0808183                                    | 228.6887985                                 | -274.7489014                           |
| 507313158                                  | 381.3692932                            | 113.2884521                                    | 188.7677658                                 | -292.7407837                           |
| 667586209.7                                | 364.118927                             | 110.4992379                                    | 172.3639069                                 | -388.2623291                           |
| 359844434.4                                | 325.5603027                            | 101.0966389                                    | 197.1925522                                 | -174.6983643                           |
| 1257056566                                 | 416.289917                             | 139.8056264                                    | 235.9568405                                 | -285.2705994                           |
| 1849761196                                 | 403.5219116                            | 114.9702156                                    | 162.5025635                                 | -429.3480225                           |
| 1302234098                                 | 377.0262451                            | 120.8942595                                    | 194.9426254                                 | -376.2444763                           |
| 1297620814                                 | 331.555481                             | 105.0866569                                    | 151.7712067                                 | -366.4605408                           |
| 1603847607                                 | 441.6829834                            | 131.752743                                     | 208.4969955                                 | -476.4846191                           |
| 935589345.5                                | 394.6156921                            | 110.9091375                                    | 168.6671661                                 | -299.329895                            |
| 277036936.9                                | 253.0313721                            | 98.99508103                                    | 108.5482529                                 | -411.6335449                           |
| 144552586.3                                | 230.0640106                            | 80.12130711                                    | 114.7256676                                 | -276.5813904                           |
| 2037884642                                 | 432.2870789                            | 114.3324543                                    | 201.6578308                                 | -315.0462952                           |

| log.sigma.3.0.mm.3D_firstorder_Entropy | log.sigma.3.0.mm.3D_firstorder_StandardDeviation | log.sigma.3.0.mm.3D_firstorder_Range | log.sigma.3.0.mm.3D_firstorder_Variance | log.sigma.3.0.mm.3D_firstorder_10Percentile |
|----------------------------------------|--------------------------------------------------|--------------------------------------|-----------------------------------------|---------------------------------------------|
| 4.406254779                            | 140.6483424                                      | 904.7532959                          | 19781.95622                             | -147.3185898                                |
| 3.584917013                            | 79.265433                                        | 537.7447968                          | 6283.008869                             | -16.16106453                                |
| 3.89085173                             | 91.90402481                                      | 631.1380463                          | 8446.349776                             | -33.33346024                                |
| 4.287318436                            | 124.8256229                                      | 772.4134216                          | 15581.43613                             | -147.9847717                                |
| 3.95775432                             | 97.48642881                                      | 678.4252014                          | 9503.603802                             | -67.53399811                                |
| 4.133900012                            | 115.6726397                                      | 696.2452545                          | 13380.15957                             | -53.32676506                                |
| 4.001470688                            | 100.6682559                                      | 981.5253296                          | 10134.09775                             | -42.26044464                                |
| 3.996358317                            | 102.9605267                                      | 938.6500244                          | 10600.87006                             | -30.70667286                                |
| 4.118346954                            | 106.335588                                       | 916.6942749                          | 11307.25727                             | -56.50777435                                |
| 4.044613667                            | 105.128411                                       | 835.7711487                          | 11051.98281                             | -26.97059498                                |
| 3.740453334                            | 82.83549696                                      | 534.6123199                          | 6861.719556                             | -48.22619362                                |
| 4.082109809                            | 108.3177381                                      | 817.2359619                          | 11732.73239                             | -34.60000076                                |
| 3.563504796                            | 88.436716                                        | 725.8664246                          | 7821.052737                             | -32.68708191                                |
| 4.156171877                            | 119.3053875                                      | 935.3129883                          | 14233.77548                             | -65.79515076                                |
| 4.138005565                            | 115.9107101                                      | 971.5603333                          | 13435.29272                             | -89.74009781                                |
| 4.089637981                            | 107.3491343                                      | 789.713623                           | 11523.83664                             | -64.70521545                                |
| 3.955242983                            | 100.3039891                                      | 666.4884644                          | 10060.89022                             | -87.75565338                                |
| 3.667451367                            | 86.29760017                                      | 537.2767944                          | 7447.275795                             | -31.19517326                                |
| 3.53983337                             | 73.2216347                                       | 502.3184052                          | 5361.407789                             | -36.67224197                                |
| 4.126485807                            | 108.3587575                                      | 810.2356873                          | 11741.62032                             | -53.67528229                                |
| 3.601809116                            | 79.33209434                                      | 640.2039337                          | 6293.581192                             | -23.62376308                                |
| 3.73053826                             | 81.17625493                                      | 477.0671234                          | 6589.584364                             | -36.03981476                                |
| 3.81378778                             | 90.45018879                                      | 624.6250916                          | 8181.236651                             | -32.78712692                                |
| 3.855663198                            | 88.91497717                                      | 689.7919922                          | 7905.873164                             | -39.993293                                  |
| 3.990926612                            | 103.5290362                                      | 849.0171814                          | 10718.26134                             | -32.03763657                                |
| 4.305661588                            | 125.3797103                                      | 1011.166687                          | 15720.07175                             | -55.76544418                                |
| 4.240271597                            | 122.1442087                                      | 933.3731689                          | 14919.20772                             | -78.06571045                                |
| 3.939169143                            | 97.7734462                                       | 831.2436523                          | 9560.409121                             | -56.75859909                                |
| 3.589488647                            | 79.11278012                                      | 480.6118011                          | 6258.831978                             | -26.57719574                                |
| 3.643599287                            | 79.22996688                                      | 632.3243408                          | 6277.387651                             | -25.93178596                                |
| 3.987129717                            | 101.0797996                                      | 852.3291321                          | 10217.12588                             | -39.19957657                                |
| 3.60961215                             | 86.85391152                                      | 755.6442566                          | 7543.601947                             | -69.49884644                                |
| 4.295234917                            | 122.7569585                                      | 849.4598083                          | 15069.27087                             | -132.7646118                                |
| 4.136143992                            | 114.7454913                                      | 758.8138428                          | 13166.52776                             | -88.879879                                  |
| 4.066250992                            | 102.9086776                                      | 827.9519653                          | 10590.19592                             | -38.76738548                                |
| 3.848504095                            | 94.39779528                                      | 806.7146606                          | 8910.943753                             | -22.43250923                                |
| 3.782101869                            | 98.22132462                                      | 1060.316772                          | 9647.428609                             | -54.7874794                                 |
| 4.080208298                            | 115.85274                                        | 1035.557739                          | 13421.85736                             | -76.43930817                                |
| 3.315469618                            | 62.28951864                                      | 475.550293                           | 3879.984133                             | -35.09231148                                |
| 4.266198887                            | 116.6887348                                      | 772.4474182                          | 13616.26084                             | -105.080703                                 |
| 3.87088251                             | 101.8450815                                      | 779.5768127                          | 10372.42062                             | -98.48843307                                |
| 4.376596684                            | 127.6061066                                      | 941.3531189                          | 16283.31843                             | -122.9404495                                |
| 4.133364383                            | 107.8779887                                      | 783.1593323                          | 11637.66045                             | -54.85069866                                |
| 4.078096218                            | 108.6680773                                      | 1001.944519                          | 11808.75102                             | -94.82935715                                |
| 3.905688664                            | 96.48731554                                      | 659.4548492                          | 9309.80206                              | -13.00028019                                |
| 4.116564843                            | 108.237558                                       | 802.9890747                          | 11715.36895                             | -41.0157959                                 |
| 3.994871999                            | 101.5040607                                      | 859.0796509                          | 10303.07433                             | -39.02904625                                |
| 3.505184508                            | 73.28616366                                      | 466.021367                           | 5370.861784                             | -18.34608269                                |
| 4.042737247                            | 103.1227545                                      | 598.6875916                          | 10634.30249                             | -67.83564758                                |
| 3.759035698                            | 89.95922194                                      | 629.0688324                          | 8092.661612                             | -16.08050709                                |
| 4.163118588                            | 113.0221046                                      | 798.8131714                          | 12773.99613                             | -40.96107788                                |
| 4.270435281                            | 118.1320828                                      | 885.9160156                          | 13955.18899                             | -91.00354004                                |
| 3.906998403                            | 92.75616443                                      | 739.567688                           | 8603.70604                              | -55.89290924                                |
| 3.927574489                            | 95.23314726                                      | 593.3813629                          | 9069.352337                             | -15.58076334                                |
| 4.037448592                            | 102.10911                                        | 655.0112305                          | 10426.27034                             | -34.60336266                                |
| 3.884806539                            | 95.4151523                                       | 933.1472778                          | 9104.051289                             | -55.76055374                                |
| 4.167290104                            | 110.607526                                       | 729.716095                           | 12234.02482                             | -67.07127838                                |
| 3.954646442                            | 104.6330595                                      | 833.3373108                          | 10948.07714                             | -74.70137024                                |
| 3.870549674                            | 93.79181429                                      | 694.4963989                          | 8796.904427                             | -71.12127991                                |
| 4.112575626                            | 107.6527148                                      | 929.8578491                          | 11589.107                               | -82.23647919                                |
| 3.818703454                            | 97.0640624                                       | 833.3892212                          | 9421.43221                              | -42.84324074                                |
| 3.956995277                            | 97.5564851                                       | 806.8721619                          | 9517.267785                             | -38.83308067                                |
| 4.081131749                            | 106.8587994                                      | 881.4235535                          | 11418.80302                             | -37.61333392                                |
| 4.054867964                            | 106.0013646                                      | 942.4477844                          | 11236.2893                              | -61.52934036                                |
| 3.787249901                            | 85.09951884                                      | 504.7654877                          | 7241.928106                             | -33.62661476                                |
| 3.864634849                            | 98.6153653                                       | 895.1544495                          | 9725.024045                             | -44.91811104                                |
| 3.415320967                            | 73.34630788                                      | 691.0129089                          | 5379.680879                             | -49.85346336                                |
| 4.085106587                            | 108.9209305                                      | 1034.513977                          | 11863.7691                              | -89.93259964                                |
| 4.062465213                            | 104.8721847                                      | 961.2571716                          | 10998.17513                             | -72.60827484                                |
| 3.606325603                            | 76.77270366                                      | 588.7519836                          | 5894.048027                             | -24.06633492                                |
| 3.942968094                            | 97.96209376                                      | 698.0452271                          | 9596.571814                             | -63.19691544                                |
| 4.037612333                            | 106.045544                                       | 896.4197693                          | 11245.6574                              | -23.98648033                                |
| 4.007930548                            | 107.1397669                                      | 865.2220764                          | 11478.92965                             | -49.4653656                                 |
| 4.305715262                            | 126.4623509                                      | 805.2939148                          | 15992.7262                              | -152.2676666                                |
| 4.273535125                            | 118.0567265                                      | 792.6982117                          | 13937.39067                             | -107.0314178                                |
| 3.775103874                            | 94.27152215                                      | 661.447998                           | 8887.119889                             | -70.49351196                                |
| 3.638724644                            | 77.34723609                                      | 601.5296326                          | 5982.594931                             | -23.9542606                                 |
| 3.802832851                            | 92.66847518                                      | 634.4781189                          | 8587.446292                             | -31.69892235                                |
| 3.765582486                            | 85.45073884                                      | 622.5815125                          | 7301.828769                             | -41.58102722                                |
| 4.316149457                            | 131.7531302                                      | 928.2756042                          | 17358.88731                             | -168.8648132                                |
| 4.393673638                            | 141.2061274                                      | 887.1871948                          | 19939.17041                             | -149.2898712                                |
| 3.956049052                            | 101.2157187                                      | 826.4815369                          | 10244.62172                             | -112.3602463                                |
| 3.994454225                            | 101.1409864                                      | 833.419342                           | 10229.49912                             | -46.74955673                                |
| 3.736183038                            | 83.36570197                                      | 586.4032288                          | 6949.840265                             | -61.4981308                                 |
| 4.227716688                            | 116.3604057                                      | 835.380127                           | 13539.74401                             | -99.65309906                                |
| 3.406841543                            | 71.09777976                                      | 542.7816162                          | 5054.894287                             | -23.3306284                                 |
| 4.185773851                            | 120.997487                                       | 772.0227356                          | 14640.39187                             | -136.9337374                                |
| 4.012295321                            | 102.3781184                                      | 671.3650542                          | 10481.27913                             | -25.58142395                                |
| 3.827874598                            | 90.84982184                                      | 674.4100769                          | 8253.690128                             | -30.10702381                                |
| 3.862951684                            | 94.6416344                                       | 752.3812561                          | 8957.038961                             | -45.02339172                                |
| 3.421133975                            | 81.19043488                                      | 500.258667                           | 6591.886717                             | -15.63999087                                |
| 4.182908791                            | 111.3019487                                      | 701.5605164                          | 12388.12378                             | -53.00782356                                |
| 4.085915736                            | 108.3830335                                      | 832.8699341                          | 11746.88194                             | -94.10063934                                |
| 3.960601448                            | 99.41804317                                      | 753.2707214                          | 9883.947307                             | -43.26518631                                |
| 4.000912878                            | 98.96808522                                      | 698.0160217                          | 9794.681892                             | -99.2752861                                 |
| 4.142757181                            | 117.7386581                                      | 918.1676025                          | 13862.39162                             | -62.48953781                                |
| 4.038469491                            | 101.8000312                                      | 693.9455872                          | 10363.24635                             | -88.04410095                                |
| 3.720901211                            | 98.20075751                                      | 664.664917                           | 9643.388775                             | -114.7360611                                |
| 3.529669364                            | 72.28598697                                      | 506.645401                           | 5225.263913                             | -51.16858025                                |
| 3.807839598                            | 90.8774765                                       | 747.333374                           | 8258.715736                             | -25.59985886                                |

| log.sigma.3.0.mm.3D_firstorder_Kurtosis | log.sigma.3.0.mm.3D_firstorder_Mean | log.sigma.3.0.mm.3D_glrIm_ShortRunLowGrayLevelEmphasis | log.sigma.3.0.mm.3D_glrIm_GrayLevelVariance |
|-----------------------------------------|-------------------------------------|--------------------------------------------------------|---------------------------------------------|
| 4.318189758                             | 41.02142089                         | 0.003850134                                            | 32.87778008                                 |
| 3.99398957                              | 67.60740068                         | 0.013435989                                            | 10.69528799                                 |
| 3.366903246                             | 76.05810846                         | 0.009986373                                            | 14.18918004                                 |
| 3.136583037                             | 33.99193563                         | 0.0063638                                              | 25.56480669                                 |
| 4.019331162                             | 47.53535489                         | 0.006779036                                            | 16.07870953                                 |
| 3.164812526                             | 69.90551023                         | 0.01160593                                             | 22.02878602                                 |
| 4.008516241                             | 67.10794924                         | 0.002852475                                            | 17.11027271                                 |
| 4.412765446                             | 74.05696418                         | 0.002326238                                            | 18.08176881                                 |
| 3.788797018                             | 73.98675372                         | 0.002428371                                            | 18.89066702                                 |
| 4.776452439                             | 83.11485808                         | 0.003651749                                            | 18.72286289                                 |
| 3.308329683                             | 53.42516579                         | 0.009538119                                            | 11.49680087                                 |
| 4.062544202                             | 83.81001705                         | 0.003853377                                            | 19.72922133                                 |
| 6.070336246                             | 41.0390254                          | 0.00469867                                             | 14.26074795                                 |
| 5.663985199                             | 57.72596746                         | 0.003664992                                            | 24.15432884                                 |
| 4.630631914                             | 60.19706383                         | 0.003578426                                            | 22.73990895                                 |
| 3.628221445                             | 60.20472505                         | 0.004471126                                            | 19.45393075                                 |
| 3.754130179                             | 49.13676678                         | 0.00855972                                             | 16.64008937                                 |
| 3.836295508                             | 57.58425969                         | 0.013745408                                            | 12.79029625                                 |
| 3.127457053                             | 51.19879834                         | 0.009430567                                            | 9.048711855                                 |
| 3.520251012                             | 74.7240084                          | 0.003737794                                            | 19.62780612                                 |
| 4.280497759                             | 57.52669651                         | 0.00641788                                             | 11.0803116                                  |
| 2.924135995                             | 65.46595083                         | 0.013228448                                            | 10.85548933                                 |
| 3.750500904                             | 60.18542151                         | 0.010039585                                            | 13.91692346                                 |
| 3.659298921                             | 63.39225956                         | 0.007496118                                            | 13.32043166                                 |
| 5.133247347                             | 76.20544039                         | 0.005324309                                            | 18.19929166                                 |
| 4.596178468                             | 81.1368504                          | 0.002686653                                            | 26.28610577                                 |
| 4.289792661                             | 66.60929109                         | 0.005302999                                            | 25.25747927                                 |
| 4.390521358                             | 52.20412926                         | 0.003381865                                            | 16.31684864                                 |
| 2.942827448                             | 61.70988674                         | 0.012728496                                            | 10.21234555                                 |
| 4.767822855                             | 63.37716064                         | 0.007093816                                            | 10.77600178                                 |
| 4.456738479                             | 70.08449062                         | 0.003305034                                            | 17.44510908                                 |
| 6.639349313                             | 24.53988894                         | 0.004741947                                            | 13.25109391                                 |
| 3.449088188                             | 43.16004395                         | 0.004760671                                            | 25.03248126                                 |
| 4.24252494                              | 58.49184773                         | 0.007657225                                            | 22.30511757                                 |
| 3.512001543                             | 85.74438189                         | 0.00530711                                             | 17.65649054                                 |
| 4.612016552                             | 69.13238081                         | 0.003780197                                            | 15.34634834                                 |
| 6.965639083                             | 34.37967883                         | 0.002004817                                            | 17.05008652                                 |
| 4.232675585                             | 51.96304895                         | 0.002171094                                            | 23.72513745                                 |
| 4.559894146                             | 41.85320412                         | 0.010651564                                            | 6.652106084                                 |
| 2.92163201                              | 45.62402056                         | 0.005184597                                            | 22.378968                                   |
| 5.380434562                             | 29.50688648                         | 0.005550046                                            | 17.97919522                                 |
| 3.477455935                             | 41.66000307                         | 0.004253183                                            | 26.57142251                                 |
| 3.493441172                             | 75.19071075                         | 0.004210271                                            | 19.27007223                                 |
| 4.626471949                             | 48.27752175                         | 0.002702856                                            | 19.97087442                                 |
| 3.378431031                             | 92.67106475                         | 0.008924796                                            | 15.67897035                                 |
| 4.069992415                             | 81.65461084                         | 0.003521375                                            | 19.7169716                                  |
| 4.342499147                             | 69.65734783                         | 0.003632327                                            | 17.56189835                                 |
| 3.705848586                             | 61.97333168                         | 0.016193785                                            | 9.165154698                                 |
| 3.302317039                             | 65.41819695                         | 0.009871063                                            | 17.55625166                                 |
| 3.601812636                             | 75.55301135                         | 0.011596348                                            | 13.77902448                                 |
| 4.154424514                             | 89.86297682                         | 0.003959511                                            | 21.1627848                                  |
| 3.487409865                             | 61.63493377                         | 0.005685003                                            | 22.82637164                                 |
| 3.656560461                             | 54.83613242                         | 0.006457419                                            | 14.40483673                                 |
| 3.203800972                             | 92.80105111                         | 0.016515022                                            | 15.04340472                                 |
| 2.805292405                             | 83.11472261                         | 0.00670248                                             | 17.19865096                                 |
| 5.236747909                             | 56.92518512                         | 0.002469291                                            | 15.55753766                                 |
| 3.409803083                             | 71.72771475                         | 0.004218787                                            | 20.31460378                                 |
| 5.361759033                             | 44.01434159                         | 0.003623406                                            | 18.74575002                                 |
| 4.447937351                             | 40.23439905                         | 0.006120364                                            | 14.88342357                                 |
| 3.933773181                             | 40.58928103                         | 0.002439417                                            | 19.56716516                                 |
| 4.819703642                             | 57.82401592                         | 0.005225844                                            | 16.52450243                                 |
| 3.870494803                             | 71.68338201                         | 0.003477626                                            | 15.98044179                                 |
| 4.044586323                             | 79.35665601                         | 0.002727168                                            | 19.14360485                                 |
| 4.014032966                             | 52.51991722                         | 0.002224619                                            | 18.92682474                                 |
| 3.029687026                             | 74.23942487                         | 0.011599217                                            | 12.0215998                                  |
| 5.820496702                             | 48.54589132                         | 0.003022904                                            | 17.08553193                                 |
| 7.673817582                             | 28.53232121                         | 0.005040535                                            | 9.642946761                                 |
| 4.531562178                             | 41.33260021                         | 0.002708359                                            | 20.11110586                                 |
| 4.233085035                             | 61.94175909                         | 0.002578529                                            | 18.52725254                                 |
| 4.143033862                             | 57.0180633                          | 0.006061816                                            | 10.19100812                                 |
| 4.514467229                             | 49.32216775                         | 0.0057064                                              | 16.15602528                                 |
| 4.300391734                             | 81.12307782                         | 0.003013292                                            | 19.1072195                                  |
| 5.741226756                             | 64.18430804                         | 0.003205131                                            | 19.67436499                                 |
| 3.296639712                             | 27.65315432                         | 0.006498932                                            | 26.51780907                                 |
| 3.248620885                             | 42.41794995                         | 0.005633376                                            | 22.93176953                                 |
| 5.881488095                             | 45.46812593                         | 0.005716545                                            | 15.27850041                                 |
| 3.854513628                             | 66.40224367                         | 0.007241908                                            | 10.37414717                                 |
| 4.296660705                             | 59.45347118                         | 0.008024664                                            | 14.700353                                   |
| 3.745004168                             | 57.81650941                         | 0.008635118                                            | 12.30437848                                 |
| 3.835816163                             | 25.63692316                         | 0.003603897                                            | 28.67690122                                 |
| 4.248930837                             | 40.73599344                         | 0.004395107                                            | 33.01669555                                 |
| 4.556166614                             | 23.23481511                         | 0.012017599                                            | 17.65054633                                 |
| 4.332639418                             | 65.03876413                         | 0.004396789                                            | 17.30875726                                 |
| 3.772748533                             | 49.94158722                         | 0.00678876                                             | 11.56821253                                 |
| 3.422936897                             | 54.64732945                         | 0.006260877                                            | 22.21369191                                 |
| 3.958828817                             | 48.36381196                         | 0.005607057                                            | 8.824446005                                 |
| 4.142927309                             | 23.15098149                         | 0.00470323                                             | 24.86674937                                 |
| 3.334687584                             | 86.58167644                         | 0.007794407                                            | 17.63909215                                 |
| 4.157263613                             | 67.68000626                         | 0.007215324                                            | 13.88210987                                 |
| 5.177028886                             | 57.03545044                         | 0.004636878                                            | 15.49781811                                 |
| 3.185193252                             | 60.23822445                         | 0.012673391                                            | 11.37128522                                 |
| 3.127679565                             | 84.60194673                         | 0.00619639                                             | 20.37712315                                 |
| 4.436054385                             | 38.35711843                         | 0.00353567                                             | 19.79348957                                 |
| 4.442584634                             | 68.78571556                         | 0.003698823                                            | 16.79996668                                 |
| 3.337778364                             | 35.3344529                          | 0.004793072                                            | 16.14560828                                 |
| 4.858980927                             | 59.13031084                         | 0.002778025                                            | 23.79225918                                 |
| 3.348383485                             | 44.01806952                         | 0.007503243                                            | 17.20137335                                 |
| 5.620144717                             | 12.51548216                         | 0.00582558                                             | 16.66091425                                 |
| 4.259259656                             | 34.55661934                         | 0.007544429                                            | 9.13754975                                  |
| 3.586753467                             | 69.37718915                         | 0.004450608                                            | 14.11136281                                 |



| log.sigma.3.0.mm.3D_glrIm_LowGrayLevelRunEmphasis | log.sigma.3.0.mm.3D_glrIm_GrayLevelNonUniformityNormalized | log.sigma.3.0.mm.3D_glrIm_RunVariance | log.sigma.3.0.mm.3D_glrIm_GrayLevelNonUniformity |
|---------------------------------------------------|------------------------------------------------------------|---------------------------------------|--------------------------------------------------|
| 0.003984357                                       | 0.058105628                                                | 0.10598904                            | 114.0067754                                      |
| 0.014397659                                       | 0.103276588                                                | 0.179781784                           | 84.91843319                                      |
| 0.010767285                                       | 0.078541682                                                | 0.198751417                           | 105.4184256                                      |
| 0.006634089                                       | 0.061011725                                                | 0.10820781                            | 54.53012978                                      |
| 0.007147543                                       | 0.078148671                                                | 0.142338817                           | 165.6888175                                      |
| 0.012239641                                       | 0.069349668                                                | 0.112595238                           | 41.65771334                                      |
| 0.003074801                                       | 0.075360096                                                | 0.170014233                           | 379.0689107                                      |
| 0.002507058                                       | 0.077628472                                                | 0.164714312                           | 352.0374627                                      |
| 0.002586723                                       | 0.067771402                                                | 0.133142313                           | 277.8504374                                      |
| 0.003810818                                       | 0.070913941                                                | 0.112246572                           | 69.13243589                                      |
| 0.010118772                                       | 0.087013113                                                | 0.139433638                           | 117.7079168                                      |
| 0.004055306                                       | 0.072508634                                                | 0.129874757                           | 151.0689865                                      |
| 0.005177744                                       | 0.111182139                                                | 0.358492427                           | 171.2586223                                      |
| 0.003812315                                       | 0.071719114                                                | 0.138829031                           | 110.7809154                                      |
| 0.003737862                                       | 0.072044063                                                | 0.124566156                           | 130.188564                                       |
| 0.00478914                                        | 0.070388943                                                | 0.163054882                           | 274.2115459                                      |
| 0.008950444                                       | 0.076439644                                                | 0.106953719                           | 83.29434949                                      |
| 0.014829977                                       | 0.098077559                                                | 0.204707662                           | 104.6547146                                      |
| 0.010297846                                       | 0.100383122                                                | 0.17826282                            | 113.6880072                                      |
| 0.003994833                                       | 0.06894804                                                 | 0.135168878                           | 322.5636388                                      |
| 0.007130803                                       | 0.100408928                                                | 0.279894145                           | 255.3398346                                      |
| 0.014032029                                       | 0.086701124                                                | 0.124075523                           | 84.4391187                                       |
| 0.010710817                                       | 0.087027516                                                | 0.159710076                           | 79.09734771                                      |
| 0.007998872                                       | 0.081972094                                                | 0.153712965                           | 193.8046997                                      |
| 0.005549144                                       | 0.077569172                                                | 0.151313068                           | 88.52192823                                      |
| 0.002805113                                       | 0.06295576                                                 | 0.09980898                            | 137.3728607                                      |
| 0.005574153                                       | 0.066487496                                                | 0.147945888                           | 193.5957025                                      |
| 0.003610371                                       | 0.080531752                                                | 0.147037055                           | 198.4883772                                      |
| 0.013536245                                       | 0.09575532                                                 | 0.123120573                           | 38.68848207                                      |
| 0.007520085                                       | 0.099050014                                                | 0.167590367                           | 179.1002004                                      |
| 0.00353343                                        | 0.077172952                                                | 0.176826139                           | 324.7758863                                      |
| 0.005090877                                       | 0.106309802                                                | 0.213724557                           | 190.4261589                                      |
| 0.005042314                                       | 0.061429999                                                | 0.122761859                           | 180.4147073                                      |
| 0.008013572                                       | 0.068640479                                                | 0.164893653                           | 144.2952302                                      |
| 0.005618174                                       | 0.070054969                                                | 0.123438297                           | 280.0229873                                      |
| 0.004081727                                       | 0.084282156                                                | 0.202499629                           | 221.0117259                                      |
| 0.002175406                                       | 0.096014283                                                | 0.232851576                           | 307.8816699                                      |
| 0.002393579                                       | 0.071987605                                                | 0.329647069                           | 133.5248941                                      |
| 0.011368462                                       | 0.117699013                                                | 0.155410969                           | 127.2539111                                      |
| 0.005512575                                       | 0.05976117                                                 | 0.11270754                            | 396.7435136                                      |
| 0.005911931                                       | 0.088886163                                                | 0.183088177                           | 202.8531205                                      |
| 0.004454349                                       | 0.057243259                                                | 0.079457732                           | 206.4048552                                      |
| 0.004443037                                       | 0.066618595                                                | 0.120279862                           | 221.230989                                       |
| 0.002845107                                       | 0.073516683                                                | 0.124452395                           | 165.9574373                                      |
| 0.009477321                                       | 0.08045325                                                 | 0.142259346                           | 92.09409213                                      |
| 0.003730594                                       | 0.069889854                                                | 0.128665185                           | 173.7546397                                      |
| 0.003881749                                       | 0.077605589                                                | 0.152908883                           | 316.3576673                                      |
| 0.017519417                                       | 0.106109362                                                | 0.188899431                           | 80.09776047                                      |
| 0.01027697                                        | 0.07189157                                                 | 0.108990453                           | 56.02466817                                      |
| 0.012647158                                       | 0.088066614                                                | 0.204144051                           | 102.7592335                                      |
| 0.004158399                                       | 0.066757242                                                | 0.115723169                           | 156.2440973                                      |
| 0.005959399                                       | 0.062010341                                                | 0.085651821                           | 194.087796                                       |
| 0.006865483                                       | 0.080692231                                                | 0.130314054                           | 327.98328                                        |
| 0.017439917                                       | 0.076193667                                                | 0.124915169                           | 76.413361                                        |
| 0.007096489                                       | 0.069251793                                                | 0.120918456                           | 83.78122669                                      |
| 0.002613488                                       | 0.084688727                                                | 0.139713348                           | 187.8157059                                      |
| 0.004446014                                       | 0.065434565                                                | 0.115441394                           | 241.5757236                                      |
| 0.003862993                                       | 0.082301088                                                | 0.164571796                           | 252.1769801                                      |
| 0.006437193                                       | 0.084716386                                                | 0.127483378                           | 126.0967185                                      |
| 0.002628372                                       | 0.068353357                                                | 0.192750509                           | 551.5715129                                      |
| 0.005673262                                       | 0.090432745                                                | 0.212940373                           | 138.3896482                                      |
| 0.003704886                                       | 0.076711486                                                | 0.146546953                           | 183.4104951                                      |
| 0.002901562                                       | 0.071388498                                                | 0.134424984                           | 373.0757782                                      |
| 0.002399289                                       | 0.073904872                                                | 0.151011445                           | 502.4517317                                      |
| 0.0124185                                         | 0.083097895                                                | 0.140195924                           | 58.78403914                                      |
| 0.003254268                                       | 0.087564993                                                | 0.197527546                           | 294.817037                                       |
| 0.005460335                                       | 0.118847403                                                | 0.241231398                           | 130.9353934                                      |
| 0.002913548                                       | 0.075075496                                                | 0.149559761                           | 419.5945161                                      |
| 0.00273154                                        | 0.072817745                                                | 0.13283102                            | 385.6312987                                      |
| 0.006552525                                       | 0.097885034                                                | 0.193693875                           | 246.864192                                       |
| 0.006018618                                       | 0.079444152                                                | 0.1319992                             | 92.78093033                                      |
| 0.003229914                                       | 0.074770067                                                | 0.170277972                           | 284.6111839                                      |
| 0.003385486                                       | 0.07782579                                                 | 0.152260019                           | 158.7650422                                      |
| 0.006762955                                       | 0.060322553                                                | 0.103107932                           | 125.3585082                                      |
| 0.005939639                                       | 0.060747196                                                | 0.097831694                           | 175.2929394                                      |
| 0.00604038                                        | 0.090762577                                                | 0.155664675                           | 107.8482324                                      |
| 0.007893908                                       | 0.096396632                                                | 0.187740332                           | 201.3323188                                      |
| 0.00861028                                        | 0.089976177                                                | 0.178089331                           | 75.65904352                                      |
| 0.009174403                                       | 0.088496615                                                | 0.14759394                            | 134.6438064                                      |
| 0.003757667                                       | 0.062282489                                                | 0.096349842                           | 134.3268492                                      |
| 0.004563953                                       | 0.058929807                                                | 0.107547055                           | 108.3219394                                      |
| 0.012663437                                       | 0.080086395                                                | 0.15838599                            | 128.1795082                                      |
| 0.004719791                                       | 0.076236915                                                | 0.18689591                            | 220.5905739                                      |
| 0.007339171                                       | 0.090238596                                                | 0.154332856                           | 245.45018                                        |
| 0.00658977                                        | 0.063687236                                                | 0.112542502                           | 142.029103                                       |
| 0.006275853                                       | 0.11507737                                                 | 0.269515998                           | 147.181468                                       |
| 0.004944069                                       | 0.067924032                                                | 0.150858624                           | 145.297499                                       |
| 0.008273749                                       | 0.073019591                                                | 0.160486874                           | 178.2320385                                      |
| 0.007671773                                       | 0.085599522                                                | 0.161023802                           | 110.9016988                                      |
| 0.004923833                                       | 0.086052425                                                | 0.177852315                           | 152.8651872                                      |
| 0.014429699                                       | 0.111918142                                                | 0.274099224                           | 121.8974766                                      |
| 0.006511252                                       | 0.064532689                                                | 0.103692816                           | 141.2807228                                      |
| 0.003733981                                       | 0.072772674                                                | 0.125766935                           | 341.4396084                                      |
| 0.003930435                                       | 0.079011202                                                | 0.150228006                           | 233.2265214                                      |
| 0.005062383                                       | 0.073637996                                                | 0.110738207                           | 292.0774672                                      |
| 0.002958346                                       | 0.070303927                                                | 0.191565721                           | 212.3020698                                      |
| 0.007988832                                       | 0.072586223                                                | 0.141232505                           | 183.7854108                                      |
| 0.006168893                                       | 0.098159641                                                | 0.189631942                           | 89.44206802                                      |
| 0.008063413                                       | 0.103619338                                                | 0.170859713                           | 75.69945611                                      |
| 0.004872017                                       | 0.085502042                                                | 0.208338468                           | 429.9750319                                      |

| log.sigma.3.0.mm.3D_glrIm_LongRunEmphasis | log.sigma.3.0.mm.3D_glrIm_ShortRunHighGrayLevelEmphasis | log.sigma.3.0.mm.3D_glrIm_RunLengthNonUniformity | log.sigma.3.0.mm.3D_glrIm_ShortRunEmphasis |
|-------------------------------------------|---------------------------------------------------------|--------------------------------------------------|--------------------------------------------|
| 1.278708605                               | 533.4917493                                             | 1704.561743                                      | 0.94563397                                 |
| 1.482906608                               | 125.9481491                                             | 650.3920578                                      | 0.908673797                                |
| 1.517877064                               | 159.1275483                                             | 1062.292739                                      | 0.907960748                                |
| 1.307607228                               | 320.9024504                                             | 756.275762                                       | 0.935360361                                |
| 1.393969865                               | 261.4582939                                             | 1727.420448                                      | 0.920911532                                |
| 1.324535195                               | 187.174163                                              | 503.0268069                                      | 0.931056883                                |
| 1.438205126                               | 395.3715919                                             | 4096.637972                                      | 0.920230115                                |
| 1.43809473                                | 483.8970279                                             | 3664.147791                                      | 0.917469685                                |
| 1.367051943                               | 484.8430413                                             | 3392.533096                                      | 0.92644765                                 |
| 1.324613877                               | 461.3463365                                             | 814.7433407                                      | 0.93074111                                 |
| 1.387101582                               | 157.2000502                                             | 1107.275754                                      | 0.922423411                                |
| 1.357551983                               | 384.4321071                                             | 1731.000061                                      | 0.928457143                                |
| 1.850069331                               | 274.1423876                                             | 1118.667676                                      | 0.874673062                                |
| 1.379627453                               | 547.6424178                                             | 1273.326616                                      | 0.92522849                                 |
| 1.335489014                               | 426.4060481                                             | 1525.179216                                      | 0.933988556                                |
| 1.433050089                               | 316.3414263                                             | 3166.310201                                      | 0.919089538                                |
| 1.309977072                               | 236.4255036                                             | 916.0490383                                      | 0.933184822                                |
| 1.549826331                               | 118.2400676                                             | 822.9993582                                      | 0.898801401                                |
| 1.49781463                                | 130.0171155                                             | 881.6774386                                      | 0.902852713                                |
| 1.37330479                                | 336.9770968                                             | 3856.438539                                      | 0.925404309                                |
| 1.706511946                               | 181.912998                                              | 1886.316721                                      | 0.883571076                                |
| 1.355615432                               | 124.5244239                                             | 803.2990935                                      | 0.925468966                                |
| 1.435781622                               | 167.1239897                                             | 731.6302529                                      | 0.915794229                                |
| 1.413556326                               | 195.3922993                                             | 1928.372808                                      | 0.920630516                                |
| 1.403871334                               | 371.9698894                                             | 935.8558376                                      | 0.922617167                                |
| 1.280895272                               | 556.0465721                                             | 1871.523199                                      | 0.940863654                                |
| 1.386612298                               | 365.4763125                                             | 2411.604571                                      | 0.926985102                                |
| 1.407077484                               | 368.0533252                                             | 1999.608453                                      | 0.919130385                                |
| 1.353419618                               | 123.1782007                                             | 334.1680664                                      | 0.926160615                                |
| 1.465954535                               | 214.6807213                                             | 1430.730133                                      | 0.908969454                                |
| 1.461024851                               | 396.5308774                                             | 3389.089969                                      | 0.915817458                                |
| 1.559505905                               | 316.034953                                              | 1386.278828                                      | 0.900076274                                |
| 1.335258511                               | 367.0346335                                             | 2466.698086                                      | 0.93251177                                 |
| 1.419713022                               | 349.2027117                                             | 1732.665052                                      | 0.924747428                                |
| 1.340279115                               | 284.922306                                              | 3343.95998                                       | 0.93112709                                 |
| 1.517492519                               | 356.2919318                                             | 2075.128868                                      | 0.908877546                                |
| 1.596000065                               | 570.5536721                                             | 2471.635292                                      | 0.897840625                                |
| 1.748072413                               | 528.5637374                                             | 3299.22683                                       | 0.891861383                                |
| 1.456050659                               | 138.7638491                                             | 847.7907619                                      | 0.905489882                                |
| 1.315089014                               | 270.9602326                                             | 5606.76228                                       | 0.934701515                                |
| 1.485767681                               | 296.8314874                                             | 1812.689988                                      | 0.910289061                                |
| 1.230816665                               | 338.9051382                                             | 3153.935426                                      | 0.948770209                                |
| 1.335913067                               | 337.0714855                                             | 2784.88248                                       | 0.931473555                                |
| 1.343835298                               | 482.4647389                                             | 1888.005644                                      | 0.9307081                                  |
| 1.396209369                               | 176.7275451                                             | 934.100754                                       | 0.921046089                                |
| 1.351939514                               | 383.5892622                                             | 2073.09792                                       | 0.929632512                                |
| 1.410499862                               | 361.7558588                                             | 3328.41576                                       | 0.92138373                                 |
| 1.527546077                               | 99.06455016                                             | 581.0921478                                      | 0.897926186                                |
| 1.305909686                               | 201.9533182                                             | 662.5205793                                      | 0.93715264                                 |
| 1.556712198                               | 135.5942055                                             | 895.2660873                                      | 0.896297251                                |
| 1.323549302                               | 396.2851112                                             | 1969.604842                                      | 0.933330162                                |
| 1.247414849                               | 293.6002309                                             | 2718.824654                                      | 0.945846966                                |
| 1.365440717                               | 212.8588471                                             | 3350.317671                                      | 0.925438691                                |
| 1.342181363                               | 133.8481761                                             | 841.505791                                       | 0.931688069                                |
| 1.333471229                               | 223.2852642                                             | 1015.511935                                      | 0.932199962                                |
| 1.392233951                               | 532.6504777                                             | 1419.653544                                      | 0.920290771                                |
| 1.320012209                               | 334.1644355                                             | 3118.611408                                      | 0.934607876                                |
| 1.444545265                               | 390.8553511                                             | 2462.408568                                      | 0.915088694                                |
| 1.358767379                               | 252.8695363                                             | 1231.479321                                      | 0.926590719                                |
| 1.478617921                               | 469.172925                                              | 6518.16449                                       | 0.916937257                                |
| 1.555166272                               | 244.2987249                                             | 1186.494672                                      | 0.901381231                                |
| 1.398589094                               | 361.6941961                                             | 1955.422319                                      | 0.922133602                                |
| 1.364694969                               | 456.1803996                                             | 4338.417882                                      | 0.928205176                                |
| 1.413088588                               | 490.3155003                                             | 5519.821554                                      | 0.919135449                                |
| 1.397542891                               | 133.164442                                              | 577.978109                                       | 0.91999587                                 |
| 1.521220892                               | 435.6725344                                             | 2633.165963                                      | 0.904673659                                |
| 1.653885268                               | 280.900373                                              | 814.0609134                                      | 0.882091311                                |
| 1.404741072                               | 470.2682173                                             | 4560.314752                                      | 0.921247761                                |
| 1.360271151                               | 461.8151911                                             | 4406.524061                                      | 0.928780094                                |
| 1.520845707                               | 207.9289757                                             | 1963.669555                                      | 0.902798867                                |
| 1.375088901                               | 295.1641902                                             | 956.8292131                                      | 0.922580651                                |
| 1.447078628                               | 416.2220693                                             | 3071.836468                                      | 0.916869454                                |
| 1.40679816                                | 467.7160393                                             | 1669.720632                                      | 0.922202539                                |
| 1.28789781                                | 346.5021449                                             | 1778.893046                                      | 0.939951388                                |
| 1.277338315                               | 270.2857805                                             | 2476.257977                                      | 0.941097958                                |
| 1.438401779                               | 315.0224916                                             | 950.0112383                                      | 0.912961471                                |
| 1.511834486                               | 167.8640671                                             | 1629.331862                                      | 0.903582376                                |
| 1.4855063                                 | 190.9192335                                             | 663.81674                                        | 0.907977015                                |
| 1.412434978                               | 186.6311604                                             | 1230.032127                                      | 0.917430472                                |
| 1.27581832                                | 458.1364078                                             | 1850.671495                                      | 0.940955693                                |
| 1.281902699                               | 490.9013399                                             | 1595.579448                                      | 0.945266214                                |
| 1.426724908                               | 180.7475216                                             | 1296.295718                                      | 0.918197557                                |
| 1.476311278                               | 353.7982148                                             | 2340.946889                                      | 0.916583087                                |
| 1.436738819                               | 201.1113919                                             | 2170.157976                                      | 0.912076511                                |
| 1.313872034                               | 279.9865815                                             | 1891.687961                                      | 0.935881149                                |
| 1.718951471                               | 192.3317067                                             | 928.596678                                       | 0.875054294                                |
| 1.401268589                               | 367.9242189                                             | 1760.969251                                      | 0.924109195                                |
| 1.426278597                               | 224.6718309                                             | 1981.476115                                      | 0.919343641                                |
| 1.445859842                               | 224.3794836                                             | 1036.257906                                      | 0.912816773                                |
| 1.486749651                               | 333.668315                                              | 1400.088355                                      | 0.907281561                                |
| 1.718629846                               | 101.8885546                                             | 793.4999433                                      | 0.876684987                                |
| 1.290461329                               | 256.2096733                                             | 1871.043211                                      | 0.939290302                                |
| 1.349553698                               | 388.9314364                                             | 3900.661753                                      | 0.928706362                                |
| 1.404028556                               | 357.5574833                                             | 2414.055193                                      | 0.922202166                                |
| 1.317327154                               | 279.7892405                                             | 3331.389124                                      | 0.93271081                                 |
| 1.48215081                                | 501.6803024                                             | 2424.5935                                        | 0.914869865                                |
| 1.384511405                               | 203.0652094                                             | 2081.297542                                      | 0.923979895                                |
| 1.522083096                               | 302.1582237                                             | 707.1429012                                      | 0.901055015                                |
| 1.483041592                               | 179.5398441                                             | 570.9058191                                      | 0.903769487                                |
| 1.533877817                               | 258.1805057                                             | 3946.472451                                      | 0.905941107                                |

| log.sigma.3.0.mm.3D_glrIm_LongRunHighGrayLevelEmphasis | log.sigma.3.0.mm.3D_glrIm_RunPercentage | log.sigma.3.0.mm.3D_glrIm_LongRunLowGrayLevelEmphasis | log.sigma.3.0.mm.3D_glrIm_RunEntropy |
|--------------------------------------------------------|-----------------------------------------|-------------------------------------------------------|--------------------------------------|
| 728.5012675                                            | 0.924418183                             | 0.004635409                                           | 4.818903632                          |
| 196.5425685                                            | 0.878815302                             | 0.019331052                                           | 4.19093478                           |
| 253.6701733                                            | 0.874435864                             | 0.015075353                                           | 4.502386458                          |
| 451.529611                                             | 0.914494922                             | 0.007866477                                           | 4.724694926                          |
| 395.7215799                                            | 0.895140333                             | 0.008919167                                           | 4.506260803                          |
| 259.8585811                                            | 0.91002331                              | 0.015116824                                           | 4.57987428                           |
| 599.4029469                                            | 0.889767638                             | 0.004295472                                           | 4.575915673                          |
| 741.0325854                                            | 0.887476658                             | 0.00346437                                            | 4.593300099                          |
| 713.5511014                                            | 0.901790247                             | 0.003374545                                           | 4.634789931                          |
| 655.3329391                                            | 0.909299656                             | 0.004550987                                           | 4.515446906                          |
| 236.4329902                                            | 0.896857784                             | 0.012982102                                           | 4.271108972                          |
| 558.5754677                                            | 0.903654263                             | 0.00505899                                            | 4.595494519                          |
| 552.5440374                                            | 0.823369453                             | 0.008379083                                           | 4.442275453                          |
| 808.9093545                                            | 0.899198065                             | 0.004554198                                           | 4.689826356                          |
| 613.8921333                                            | 0.910476117                             | 0.004537966                                           | 4.622146134                          |
| 478.9423225                                            | 0.889677964                             | 0.006453726                                           | 4.660102353                          |
| 336.8483357                                            | 0.912575699                             | 0.01069323                                            | 4.412658722                          |
| 194.5876478                                            | 0.864745149                             | 0.020633198                                           | 4.3406969                            |
| 209.6345274                                            | 0.872288728                             | 0.014730827                                           | 4.170567273                          |
| 490.8584812                                            | 0.899714442                             | 0.005264929                                           | 4.661750817                          |
| 332.7674772                                            | 0.840074278                             | 0.01146607                                            | 4.388192012                          |
| 181.3245784                                            | 0.902545092                             | 0.017747372                                           | 4.223330689                          |
| 252.9882574                                            | 0.887094351                             | 0.014121658                                           | 4.38529063                           |
| 293.667509                                             | 0.89288309                              | 0.010570004                                           | 4.410738915                          |
| 554.491786                                             | 0.895884948                             | 0.00671859                                            | 4.528004923                          |
| 753.6377862                                            | 0.92106374                              | 0.003362568                                           | 4.736333574                          |
| 537.0888644                                            | 0.900045207                             | 0.006947651                                           | 4.773265343                          |
| 559.2841655                                            | 0.892135019                             | 0.004752217                                           | 4.511161212                          |
| 173.4448714                                            | 0.903631045                             | 0.017357695                                           | 4.06196003                           |
| 345.9254662                                            | 0.879859187                             | 0.009687865                                           | 4.261295863                          |
| 619.1969216                                            | 0.884130372                             | 0.004776024                                           | 4.591092198                          |
| 555.2719912                                            | 0.864929174                             | 0.00693285                                            | 4.305334502                          |
| 526.6670745                                            | 0.909474236                             | 0.006352944                                           | 4.776895951                          |
| 528.9663917                                            | 0.894238953                             | 0.009812561                                           | 4.676730211                          |
| 404.1348383                                            | 0.907549081                             | 0.007115691                                           | 4.560893681                          |
| 573.2664851                                            | 0.873855388                             | 0.00576484                                            | 4.491851076                          |
| 1009.697795                                            | 0.860355984                             | 0.003163125                                           | 4.507032435                          |
| 977.9359374                                            | 0.842502198                             | 0.00392944                                            | 4.857653217                          |
| 228.0363222                                            | 0.878861789                             | 0.014728812                                           | 3.925929913                          |
| 377.5029342                                            | 0.913130886                             | 0.007079815                                           | 4.732911094                          |
| 493.4164966                                            | 0.878832809                             | 0.007777757                                           | 4.504906914                          |
| 437.1611564                                            | 0.932446142                             | 0.005350695                                           | 4.755810304                          |
| 482.1314185                                            | 0.908863105                             | 0.005571405                                           | 4.617648359                          |
| 706.502963                                             | 0.90703067                              | 0.003543531                                           | 4.577767221                          |
| 259.7940971                                            | 0.89514867                              | 0.012271745                                           | 4.445819027                          |
| 548.5672697                                            | 0.905506515                             | 0.004780745                                           | 4.617823344                          |
| 541.6995437                                            | 0.893231713                             | 0.005165786                                           | 4.564373362                          |
| 161.544016                                             | 0.8665548                               | 0.024236526                                           | 4.162596275                          |
| 283.0542542                                            | 0.915574437                             | 0.012190008                                           | 4.478530503                          |
| 219.1311712                                            | 0.86276741                              | 0.018251351                                           | 4.436542154                          |
| 561.1658722                                            | 0.910980028                             | 0.005114269                                           | 4.638737962                          |
| 387.2718919                                            | 0.928507861                             | 0.007185383                                           | 4.666465746                          |
| 312.8121062                                            | 0.900760366                             | 0.008844643                                           | 4.436436483                          |
| 184.7169738                                            | 0.908096433                             | 0.021849705                                           | 4.40060518                           |
| 311.3840632                                            | 0.909543088                             | 0.009011644                                           | 4.503229151                          |
| 808.9215868                                            | 0.894792899                             | 0.003320078                                           | 4.440060779                          |
| 470.1631283                                            | 0.912541599                             | 0.005545384                                           | 4.638455963                          |
| 619.5690748                                            | 0.885727633                             | 0.005073899                                           | 4.556106123                          |
| 372.1377656                                            | 0.902865945                             | 0.007959385                                           | 4.388843526                          |
| 741.2328726                                            | 0.88367586                              | 0.003726839                                           | 4.709052423                          |
| 402.7935561                                            | 0.865449952                             | 0.008176959                                           | 4.512815872                          |
| 543.1015729                                            | 0.895188706                             | 0.004865695                                           | 4.504926621                          |
| 661.3444048                                            | 0.902520696                             | 0.003778245                                           | 4.604995075                          |
| 741.1870737                                            | 0.89175471                              | 0.003286177                                           | 4.62705365                           |
| 197.5970865                                            | 0.895228822                             | 0.016408353                                           | 4.303838153                          |
| 712.9104134                                            | 0.871091105                             | 0.00451029                                            | 4.539616181                          |
| 529.8634302                                            | 0.844148183                             | 0.007721067                                           | 4.194942543                          |
| 714.6386024                                            | 0.893993846                             | 0.003924451                                           | 4.654575761                          |
| 685.1319834                                            | 0.90400704                              | 0.003497246                                           | 4.579335875                          |
| 342.9725323                                            | 0.869989913                             | 0.009176176                                           | 4.268202532                          |
| 441.9080172                                            | 0.898738675                             | 0.007482951                                           | 4.464691409                          |
| 639.52506                                              | 0.88678501                              | 0.004398216                                           | 4.631785435                          |
| 708.5864333                                            | 0.89475816                              | 0.004307888                                           | 4.561341195                          |
| 483.6046492                                            | 0.919807948                             | 0.007945616                                           | 4.742659807                          |
| 361.3023418                                            | 0.921553694                             | 0.007347978                                           | 4.700298285                          |
| 509.2280468                                            | 0.885073942                             | 0.007606193                                           | 4.36721692                           |
| 271.2724189                                            | 0.871195582                             | 0.011322953                                           | 4.295630319                          |
| 299.5565919                                            | 0.876987313                             | 0.011652374                                           | 4.425659128                          |
| 284.4910763                                            | 0.89108197                              | 0.011795768                                           | 4.329434954                          |
| 632.8611464                                            | 0.921860098                             | 0.004455987                                           | 4.744327821                          |
| 670.7782556                                            | 0.923889082                             | 0.00538247                                            | 4.806045994                          |
| 281.1108099                                            | 0.889340232                             | 0.015791559                                           | 4.53695771                           |
| 553.3903873                                            | 0.884344777                             | 0.006455971                                           | 4.585950279                          |
| 319.022832                                             | 0.885003379                             | 0.00996941                                            | 4.324452217                          |
| 396.641743                                             | 0.914246066                             | 0.008127143                                           | 4.681342226                          |
| 365.6974169                                            | 0.83390239                              | 0.010087837                                           | 4.208846421                          |
| 566.7624118                                            | 0.896468312                             | 0.006149045                                           | 4.732031593                          |
| 336.2626813                                            | 0.889945576                             | 0.010749287                                           | 4.579137611                          |
| 350.4960302                                            | 0.884562842                             | 0.009952161                                           | 4.413210445                          |
| 544.6848546                                            | 0.876695157                             | 0.00640586                                            | 4.493337347                          |
| 174.9251185                                            | 0.834532798                             | 0.024559133                                           | 4.226125322                          |
| 350.0846148                                            | 0.919072531                             | 0.007983753                                           | 4.614223904                          |
| 569.0852127                                            | 0.905089123                             | 0.004687271                                           | 4.600449911                          |
| 540.1952499                                            | 0.894265734                             | 0.005120934                                           | 4.521215775                          |
| 400.1386245                                            | 0.911358173                             | 0.006312702                                           | 4.478539352                          |
| 798.6805224                                            | 0.881940386                             | 0.003977115                                           | 4.754964716                          |
| 303.5413414                                            | 0.89858278                              | 0.010374351                                           | 4.567009583                          |
| 522.7457811                                            | 0.869370362                             | 0.007918341                                           | 4.380291902                          |
| 302.0204708                                            | 0.875576462                             | 0.010602751                                           | 4.142943008                          |
| 414.9805089                                            | 0.870400469                             | 0.007265763                                           | 4.472466934                          |

| log.sigma.3.0.mm.3D_glrIm_HighGrayLevelRunEmphasis | log.sigma.3.0.mm.3D_glrIm_RunLengthNonUniformityNormalized | log.sigma.3.0.mm.3D_glszm_GrayLevelVariance |
|----------------------------------------------------|------------------------------------------------------------|---------------------------------------------|
| 565.4487312                                        | 0.868085251                                                | 44.84060094                                 |
| 137.3736348                                        | 0.789231207                                                | 19.57950011                                 |
| 173.52954                                          | 0.788872165                                                | 23.10071332                                 |
| 343.3685492                                        | 0.845067838                                                | 32.91122449                                 |
| 284.0006282                                        | 0.813775387                                                | 24.86676768                                 |
| 199.9746904                                        | 0.835825641                                                | 29.63403754                                 |
| 427.1665219                                        | 0.813222163                                                | 27.61483259                                 |
| 524.9860576                                        | 0.807100319                                                | 33.24780465                                 |
| 523.2540071                                        | 0.826000657                                                | 27.1643165                                  |
| 495.571163                                         | 0.834675746                                                | 28.95557565                                 |
| 170.502648                                         | 0.817251558                                                | 16.37332126                                 |
| 413.5974985                                        | 0.830001928                                                | 31.84294342                                 |
| 310.4505755                                        | 0.72440389                                                 | 32.1472937                                  |
| 591.1349863                                        | 0.823398024                                                | 41.42643604                                 |
| 457.4470512                                        | 0.842696029                                                | 36.29175876                                 |
| 342.0912764                                        | 0.81117275                                                 | 29.63601286                                 |
| 254.2731706                                        | 0.839777214                                                | 24.76608856                                 |
| 130.3098432                                        | 0.769661469                                                | 21.21899993                                 |
| 143.1750399                                        | 0.777086745                                                | 13.06117659                                 |
| 362.7018528                                        | 0.823458993                                                | 29.56847472                                 |
| 203.8399886                                        | 0.740312572                                                | 21.6046905                                  |
| 134.3172192                                        | 0.823465472                                                | 16.14925164                                 |
| 181.2439931                                        | 0.803777829                                                | 22.5414876                                  |
| 211.3799485                                        | 0.814085042                                                | 20.94175441                                 |
| 401.5963408                                        | 0.818460404                                                | 33.76107958                                 |
| 590.4636943                                        | 0.856827062                                                | 41.03183391                                 |
| 393.0616833                                        | 0.82735317                                                 | 38.6770337                                  |
| 399.8825905                                        | 0.810298334                                                | 29.00035963                                 |
| 131.8694717                                        | 0.825423356                                                | 14.38571674                                 |
| 236.201006                                         | 0.789661455                                                | 22.48049587                                 |
| 431.19118                                          | 0.804101934                                                | 30.16965146                                 |
| 352.2036313                                        | 0.772320904                                                | 25.34970242                                 |
| 393.7536863                                        | 0.838744998                                                | 34.96917859                                 |
| 376.9897584                                        | 0.823102392                                                | 33.35407828                                 |
| 305.0318039                                        | 0.83566614                                                 | 25.71304915                                 |
| 389.4336554                                        | 0.790136072                                                | 26.94999498                                 |
| 635.0410428                                        | 0.768737719                                                | 38.18249887                                 |
| 586.7425075                                        | 0.75680802                                                 | 37.96015257                                 |
| 154.0067584                                        | 0.782329811                                                | 12.52156683                                 |
| 289.284921                                         | 0.843439792                                                | 28.24086085                                 |
| 327.5268146                                        | 0.792886968                                                | 30.91572731                                 |
| 356.7758641                                        | 0.874162001                                                | 32.82988075                                 |
| 361.7257557                                        | 0.836990421                                                | 27.89749283                                 |
| 520.0070552                                        | 0.835203173                                                | 30.92760915                                 |
| 190.79051                                          | 0.814677488                                                | 25.85965809                                 |
| 411.4501912                                        | 0.832727284                                                | 30.04795563                                 |
| 390.9667938                                        | 0.815421216                                                | 31.01485798                                 |
| 109.3932175                                        | 0.767805319                                                | 15.70169309                                 |
| 215.8364863                                        | 0.849116255                                                | 24.79797126                                 |
| 148.9661226                                        | 0.764945044                                                | 21.9195702                                  |
| 424.6326552                                        | 0.840518122                                                | 32.53289843                                 |
| 310.303346                                         | 0.867843843                                                | 29.3536716                                  |
| 229.9228113                                        | 0.823370719                                                | 22.00192348                                 |
| 142.3727578                                        | 0.837639382                                                | 22.07441676                                 |
| 238.2055303                                        | 0.838158952                                                | 23.62912203                                 |
| 579.420487                                         | 0.812445781                                                | 29.15585572                                 |
| 357.3154147                                        | 0.843512842                                                | 28.95278991                                 |
| 427.5485882                                        | 0.802295177                                                | 33.06350773                                 |
| 273.1952864                                        | 0.826141893                                                | 26.46667624                                 |
| 510.4309608                                        | 0.80649952                                                 | 29.11654542                                 |
| 268.5542844                                        | 0.774545685                                                | 30.32947525                                 |
| 391.5505653                                        | 0.816772482                                                | 24.79214896                                 |
| 490.161721                                         | 0.829479461                                                | 27.59306952                                 |
| 531.3973357                                        | 0.810505105                                                | 30.51262397                                 |
| 144.0526048                                        | 0.813996215                                                | 18.53070348                                 |
| 479.0025337                                        | 0.781032875                                                | 34.72159546                                 |
| 319.0909694                                        | 0.73719286                                                 | 22.48506456                                 |
| 510.2309514                                        | 0.814859054                                                | 32.90146607                                 |
| 498.7323235                                        | 0.830920984                                                | 28.36159977                                 |
| 229.3790221                                        | 0.777162228                                                | 20.36799105                                 |
| 320.2898869                                        | 0.817762572                                                | 25.1324216                                  |
| 451.6609994                                        | 0.805939372                                                | 35.16414815                                 |
| 506.4379229                                        | 0.817157733                                                | 36.30456884                                 |
| 370.0583307                                        | 0.855024848                                                | 36.01881193                                 |
| 286.1597663                                        | 0.857380235                                                | 29.90389224                                 |
| 347.2338898                                        | 0.797910377                                                | 24.99348073                                 |
| 184.4357144                                        | 0.77878174                                                 | 18.50630612                                 |
| 208.4223317                                        | 0.78801223                                                 | 29.01380952                                 |
| 203.0691635                                        | 0.806913462                                                | 20.44252232                                 |
| 488.8325491                                        | 0.857194643                                                | 36.30912252                                 |
| 520.3253                                           | 0.867319537                                                | 42.24574197                                 |
| 196.8795966                                        | 0.808820143                                                | 29.99247349                                 |
| 384.0568256                                        | 0.80682422                                                 | 29.23889091                                 |
| 220.8647977                                        | 0.796048228                                                | 17.69248411                                 |
| 299.5104109                                        | 0.846643396                                                | 28.54775872                                 |
| 218.0827006                                        | 0.724278426                                                | 17.49085874                                 |
| 399.4266921                                        | 0.821688379                                                | 36.48420278                                 |
| 242.7512494                                        | 0.810930637                                                | 25.51653779                                 |
| 245.0698833                                        | 0.797981715                                                | 22.40563581                                 |
| 367.5004651                                        | 0.786444328                                                | 28.80069785                                 |
| 112.7945819                                        | 0.727084603                                                | 16.40842089                                 |
| 272.4875738                                        | 0.853535176                                                | 24.55017715                                 |
| 419.4722751                                        | 0.830403634                                                | 31.39789873                                 |
| 387.2658616                                        | 0.816920588                                                | 27.80749798                                 |
| 300.7863147                                        | 0.838911034                                                | 21.86453372                                 |
| 546.9605551                                        | 0.801973406                                                | 40.30539465                                 |
| 219.6530793                                        | 0.820650162                                                | 25.87465003                                 |
| 337.2354561                                        | 0.774281568                                                | 28.51780896                                 |
| 199.7312604                                        | 0.779437837                                                | 16.20579882                                 |
| 282.0112514                                        | 0.783738484                                                | 23.60536421                                 |

| log.sigma.3.0.mm.3D_glszm_SmallAreaHighGrayLevelEmphasis | log.sigma.3.0.mm.3D_glszm_GrayLevelNonUniformityNormalized | log.sigma.3.0.mm.3D_glszm_SizeZoneNonUniformityNormalized |
|----------------------------------------------------------|------------------------------------------------------------|-----------------------------------------------------------|
| 347.7782298                                              | 0.043891449                                                | 0.410872071                                               |
| 82.05445194                                              | 0.0664893                                                  | 0.275642372                                               |
| 104.6776275                                              | 0.058276229                                                | 0.316236413                                               |
| 193.2607713                                              | 0.051493878                                                | 0.356587755                                               |
| 157.5962096                                              | 0.057203857                                                | 0.337511478                                               |
| 122.8952215                                              | 0.054086538                                                | 0.344535873                                               |
| 258.9835109                                              | 0.054944084                                                | 0.324631261                                               |
| 318.2817375                                              | 0.049894213                                                | 0.325104335                                               |
| 296.5877377                                              | 0.054842633                                                | 0.334652545                                               |
| 285.7903976                                              | 0.0542692                                                  | 0.349394943                                               |
| 87.93953335                                              | 0.070603424                                                | 0.319640751                                               |
| 245.8897431                                              | 0.051004808                                                | 0.364102816                                               |
| 173.1823284                                              | 0.054492496                                                | 0.314359014                                               |
| 324.8378387                                              | 0.046911458                                                | 0.324572994                                               |
| 253.3779666                                              | 0.047884005                                                | 0.384207222                                               |
| 206.352405                                               | 0.053546529                                                | 0.346802472                                               |
| 127.7811553                                              | 0.059020326                                                | 0.310440601                                               |
| 73.38788402                                              | 0.062793311                                                | 0.299424945                                               |
| 74.7189219                                               | 0.078243435                                                | 0.287740232                                               |
| 218.0260989                                              | 0.052423823                                                | 0.316882791                                               |
| 111.4160316                                              | 0.062775855                                                | 0.290957324                                               |
| 70.40601735                                              | 0.070712172                                                | 0.272903253                                               |
| 115.7283939                                              | 0.060495868                                                | 0.337335537                                               |
| 122.5505304                                              | 0.061777919                                                | 0.305972176                                               |
| 244.1750877                                              | 0.054009178                                                | 0.362033571                                               |
| 367.6583596                                              | 0.045948789                                                | 0.365846367                                               |
| 254.3964011                                              | 0.046337234                                                | 0.37417785                                                |
| 221.4638874                                              | 0.053038025                                                | 0.320461383                                               |
| 67.6931771                                               | 0.082475995                                                | 0.234910837                                               |
| 126.569685                                               | 0.061115702                                                | 0.301869835                                               |
| 263.4096002                                              | 0.053421719                                                | 0.356249093                                               |
| 175.4175679                                              | 0.062406276                                                | 0.311823828                                               |
| 235.3219294                                              | 0.047396923                                                | 0.36172852                                                |
| 201.8963581                                              | 0.05034169                                                 | 0.32654661                                                |
| 190.204381                                               | 0.055921856                                                | 0.344137181                                               |
| 237.2617927                                              | 0.056838635                                                | 0.339668627                                               |
| 368.4545297                                              | 0.049601682                                                | 0.353778894                                               |
| 351.6902685                                              | 0.047263675                                                | 0.339377762                                               |
| 67.35210324                                              | 0.084421413                                                | 0.254280343                                               |
| 173.42177                                                | 0.051900502                                                | 0.305399223                                               |
| 176.1486534                                              | 0.052404597                                                | 0.351174232                                               |
| 232.1136446                                              | 0.050558758                                                | 0.369018429                                               |
| 202.4312362                                              | 0.054139031                                                | 0.32723852                                                |
| 290.7185248                                              | 0.053035277                                                | 0.356354638                                               |
| 108.4253735                                              | 0.055631111                                                | 0.300572284                                               |
| 258.7901422                                              | 0.051914857                                                | 0.377850424                                               |
| 246.3244123                                              | 0.051662846                                                | 0.338781492                                               |
| 60.21956999                                              | 0.069545224                                                | 0.246678014                                               |
| 105.9734494                                              | 0.056689342                                                | 0.288250211                                               |
| 94.01317641                                              | 0.064599204                                                | 0.2904259                                                 |
| 236.10147                                                | 0.050804765                                                | 0.311157662                                               |
| 186.6142093                                              | 0.052730083                                                | 0.340776356                                               |
| 130.3377242                                              | 0.060112813                                                | 0.318471911                                               |
| 87.04595724                                              | 0.060592124                                                | 0.331349367                                               |
| 142.7873778                                              | 0.05875283                                                 | 0.318443838                                               |
| 308.8709444                                              | 0.056207726                                                | 0.295988879                                               |
| 207.7496755                                              | 0.05178078                                                 | 0.346709871                                               |
| 233.391803                                               | 0.051885322                                                | 0.33062756                                                |
| 153.9303971                                              | 0.056251795                                                | 0.346407282                                               |
| 299.1469742                                              | 0.053591867                                                | 0.338384379                                               |
| 172.0356201                                              | 0.052236129                                                | 0.338239397                                               |
| 233.0971837                                              | 0.059082354                                                | 0.345716069                                               |
| 298.1741852                                              | 0.054790177                                                | 0.362542317                                               |
| 317.4985584                                              | 0.051298847                                                | 0.305911132                                               |
| 81.64347561                                              | 0.065825115                                                | 0.272583826                                               |
| 290.9540672                                              | 0.05143876                                                 | 0.330585801                                               |
| 156.0322837                                              | 0.065589338                                                | 0.317950854                                               |
| 296.1867283                                              | 0.050129835                                                | 0.327643628                                               |
| 288.0790545                                              | 0.053404613                                                | 0.380550062                                               |
| 133.778459                                               | 0.063146531                                                | 0.336498948                                               |
| 166.1889065                                              | 0.058776452                                                | 0.295937983                                               |
| 264.4070632                                              | 0.050041104                                                | 0.342180095                                               |
| 281.3173144                                              | 0.050114781                                                | 0.3168663                                                 |
| 199.9784253                                              | 0.046001487                                                | 0.364706112                                               |
| 183.6266129                                              | 0.051659488                                                | 0.349844154                                               |
| 160.6351083                                              | 0.06079932                                                 | 0.302543934                                               |
| 115.0798174                                              | 0.064236912                                                | 0.325225546                                               |
| 125.5149589                                              | 0.053197279                                                | 0.284353741                                               |
| 120.024788                                               | 0.062340561                                                | 0.292390784                                               |
| 276.778756                                               | 0.049010961                                                | 0.35717298                                                |
| 324.2426594                                              | 0.045186039                                                | 0.400087609                                               |
| 133.5480488                                              | 0.053564565                                                | 0.393661287                                               |
| 219.7987712                                              | 0.052973288                                                | 0.322580417                                               |
| 105.7964132                                              | 0.065842674                                                | 0.248601024                                               |
| 169.5991232                                              | 0.053371204                                                | 0.335805426                                               |
| 103.2732533                                              | 0.07562984                                                 | 0.225075973                                               |
| 214.7997582                                              | 0.047753406                                                | 0.342406855                                               |
| 138.2769441                                              | 0.055727543                                                | 0.311607765                                               |
| 138.1676865                                              | 0.06184041                                                 | 0.294070886                                               |
| 190.4079749                                              | 0.055214777                                                | 0.325351817                                               |
| 80.23505832                                              | 0.077019889                                                | 0.346046033                                               |
| 158.1657668                                              | 0.056705187                                                | 0.345265975                                               |
| 224.6862545                                              | 0.051179263                                                | 0.323787594                                               |
| 224.5277489                                              | 0.054861834                                                | 0.360927275                                               |
| 164.8922091                                              | 0.05975636                                                 | 0.321610499                                               |
| 337.5484099                                              | 0.046662335                                                | 0.389151164                                               |
| 131.0681813                                              | 0.055260584                                                | 0.301001855                                               |
| 173.4362047                                              | 0.056767768                                                | 0.342399276                                               |
| 85.29458053                                              | 0.073874099                                                | 0.283542961                                               |
| 175.1863519                                              | 0.058245056                                                | 0.339142738                                               |

| log.sigma.3.0.mm.3D_glszm_SizeZoneNonUniformity | log.sigma.3.0.mm.3D_glszm_GrayLevelNonUniformity | log.sigma.3.0.mm.3D_glszm_LargeAreaEmphasis | log.sigma.3.0.mm.3D_glszm_ZoneVariance |
|-------------------------------------------------|--------------------------------------------------|---------------------------------------------|----------------------------------------|
| 348.8303887                                     | 37.26383981                                      | 49.9057715                                  | 43.65871579                            |
| 57.05797101                                     | 13.76328502                                      | 241.47343                                   | 221.0709702                            |
| 116.375                                         | 21.44565217                                      | 110.1195652                                 | 92.74335421                            |
| 124.8057143                                     | 18.02285714                                      | 30.42                                       | 22.62792653                            |
| 222.7575758                                     | 37.75454545                                      | 103.8424242                                 | 90.96955005                            |
| 71.66346154                                     | 11.25                                            | 49.5                                        | 39.43158284                            |
| 497.9843546                                     | 84.28422425                                      | 124.9471969                                 | 111.3765704                            |
| 415.8084441                                     | 63.81469898                                      | 386.7568413                                 | 370.8068413                            |
| 461.4858593                                     | 75.6279913                                       | 67.25888325                                 | 56.39136619                            |
| 120.1918605                                     | 18.66860465                                      | 46.62790698                                 | 36.91671174                            |
| 135.2080378                                     | 29.86524823                                      | 74.37825059                                 | 61.66894131                            |
| 254.5078684                                     | 35.65236052                                      | 71.84120172                                 | 60.9672473                             |
| 101.2236025                                     | 17.54658385                                      | 981.2391304                                 | 947.6207419                            |
| 161.9619238                                     | 23.40881764                                      | 115.3807615                                 | 103.5410942                            |
| 262.0293255                                     | 32.6568915                                       | 70.23460411                                 | 61.77179419                            |
| 418.2437811                                     | 64.57711443                                      | 302.0464345                                 | 288.8802477                            |
| 110.5168539                                     | 21.01123596                                      | 44.11235955                                 | 32.86349577                            |
| 73.65853659                                     | 15.44715447                                      | 274.1910569                                 | 249.068957                             |
| 82.29370629                                     | 22.37762238                                      | 221.4195804                                 | 200.8219473                            |
| 481.6618421                                     | 79.68421053                                      | 76.18881579                                 | 64.48971563                            |
| 148.3882353                                     | 32.01568627                                      | 747.8039216                                 | 712.6459977                            |
| 72.86516854                                     | 18.88014981                                      | 66.21348315                                 | 49.88219781                            |
| 92.76727273                                     | 16.63636364                                      | 110.2690909                                 | 96.40362314                            |
| 219.6880223                                     | 44.35654596                                      | 111.862117                                  | 98.27087973                            |
| 131.7802198                                     | 19.65934066                                      | 90.07967033                                 | 77.84889355                            |
| 310.9694118                                     | 39.05647059                                      | 37.70470588                                 | 29.937009                              |
| 378.6679842                                     | 46.89328063                                      | 119.5662055                                 | 109.3603273                            |
| 241.9483444                                     | 40.04370861                                      | 250.8291391                                 | 237.4461401                            |
| 25.37037037                                     | 8.907407407                                      | 79.28703704                                 | 62.1566358                             |
| 132.8227273                                     | 26.89090909                                      | 190.4681818                                 | 168.6762603                            |
| 443.5301205                                     | 66.51004016                                      | 373.5309237                                 | 358.9256341                            |
| 136.8906606                                     | 27.39635535                                      | 424.3895216                                 | 402.1773029                            |
| 381.2618596                                     | 49.95635674                                      | 76.4487666                                  | 67.06332162                            |
| 228.2560801                                     | 35.1888412                                       | 74.71244635                                 | 63.40976789                            |
| 469.7472527                                     | 76.33333333                                      | 79.6014652                                  | 69.19197842                            |
| 242.1837307                                     | 40.5259467                                       | 367.3674614                                 | 349.675586                             |
| 283.7306733                                     | 39.78054863                                      | 724.1483791                                 | 702.6220188                            |
| 424.9009585                                     | 59.17412141                                      | 492.9400958                                 | 475.9475261                            |
| 61.79012346                                     | 20.51440329                                      | 166.7325103                                 | 141.1114159                            |
| 700.2804187                                     | 119.00785                                        | 34.48495421                                 | 24.43276366                            |
| 232.4773414                                     | 34.6918429                                       | 281.3927492                                 | 266.0386634                            |
| 580.4659886                                     | 79.52892562                                      | 17.3941513                                  | 11.35061829                            |
| 366.5071429                                     | 60.63571429                                      | 48.98839286                                 | 38.3503117                             |
| 283.6582915                                     | 42.2160804                                       | 65.79145729                                 | 56.02190601                            |
| 99.48942598                                     | 18.41389728                                      | 108.1812689                                 | 93.27373792                            |
| 335.1533258                                     | 46.04847802                                      | 114.6685457                                 | 105.0913699                            |
| 425.5095541                                     | 64.88853503                                      | 210.3232484                                 | 197.1306214                            |
| 45.1420765                                      | 12.72677596                                      | 136.4535519                                 | 113.8001135                            |
| 78.69230769                                     | 15.47619048                                      | 33.3003663                                  | 23.58332998                            |
| 88.28947368                                     | 19.63815789                                      | 286.3552632                                 | 266.5761773                            |
| 246.4368687                                     | 40.23737374                                      | 55.63762626                                 | 45.11612176                            |
| 445.735474                                      | 68.97094801                                      | 18.66743119                                 | 12.02538308                            |
| 409.8733489                                     | 77.36519037                                      | 91.02719503                                 | 78.73636853                            |
| 110.3393393                                     | 20.17717718                                      | 71.33333333                                 | 60.34201769                            |
| 131.8357488                                     | 24.3236715                                       | 49.41062802                                 | 39.09008378                            |
| 146.8104839                                     | 27.87903226                                      | 174.2258065                                 | 158.7694947                            |
| 462.8576779                                     | 69.12734082                                      | 41.98277154                                 | 32.8020985                             |
| 287.645977                                      | 45.14022989                                      | 236.583908                                  | 220.7855674                            |
| 163.5042373                                     | 26.55084746                                      | 97.31355932                                 | 85.12280954                            |
| 860.1730921                                     | 136.2305271                                      | 182.5786782                                 | 169.6814816                            |
| 151.53125                                       | 23.40178571                                      | 274.4553571                                 | 258.9162747                            |
| 265.8556567                                     | 45.4343303                                       | 123.976593                                  | 111.92152                              |
| 668.165491                                      | 100.9782963                                      | 112.9837222                                 | 103.1173742                            |
| 605.7040404                                     | 101.5717172                                      | 111.9146465                                 | 97.09214646                            |
| 53.15384615                                     | 12.83589744                                      | 85.17948718                                 | 68.76660092                            |
| 302.8165939                                     | 47.11790393                                      | 380.7445415                                 | 362.9685599                            |
| 77.89795018                                     | 16.06938776                                      | 476.7591837                                 | 448.4307205                            |
| 557.9770992                                     | 85.37110981                                      | 205.994128                                  | 192.5252711                            |
| 695.6455142                                     | 97.62363239                                      | 93.89989059                                 | 83.63396611                            |
| 209.6388443                                     | 39.34028892                                      | 401.8523274                                 | 380.2141504                            |
| 105.6498599                                     | 20.98319328                                      | 73.45938375                                 | 60.21957018                            |
| 361                                             | 52.79336493                                      | 277.0919431                                 | 260.556735                             |
| 197.4077047                                     | 31.22150883                                      | 112.9422151                                 | 99.56047603                            |
| 308.5413712                                     | 38.91725768                                      | 44.90189125                                 | 37.77185504                            |
| 395.3238938                                     | 58.37522124                                      | 37.0840708                                  | 29.40675777                            |
| 101.6547619                                     | 20.42857143                                      | 77.93452381                                 | 61.98210743                            |
| 173.3452158                                     | 34.23827392                                      | 195.7223265                                 | 175.5145183                            |
| 59.71428571                                     | 11.17142857                                      | 165.3714286                                 | 144.5604535                            |
| 130.9910714                                     | 27.92857143                                      | 107.8102679                                 | 93.29212671                            |
| 309.6689735                                     | 42.49250288                                      | 25.28373702                                 | 18.00556613                            |
| 315.2690355                                     | 35.60659898                                      | 52.14593909                                 | 45.77479934                            |
| 215.3327239                                     | 29.29981718                                      | 145.0877514                                 | 134.2712285                            |
| 271.2901308                                     | 44.55053508                                      | 233.0380499                                 | 217.9289759                            |
| 161.3420647                                     | 42.73189522                                      | 209.6533128                                 | 187.2333067                            |
| 269.9875622                                     | 42.91044776                                      | 58.3221393                                  | 49.11951901                            |
| 45.46534653                                     | 15.2722772                                       | 914.6534653                                 | 857.1340065                            |
| 260.5716163                                     | 36.34034166                                      | 122.0906702                                 | 112.2685                               |
| 234.9522546                                     | 42.01856764                                      | 190.8275862                                 | 177.6026919                            |
| 112.3350785                                     | 23.62303665                                      | 60.30890052                                 | 45.62114525                            |
| 157.1449275                                     | 26.66873706                                      | 261.5258799                                 | 243.9484331                            |
| 79.24454148                                     | 17.63755459                                      | 711.5982533                                 | 679.1729372                            |
| 294.8571429                                     | 48.42622951                                      | 31.53161593                                 | 23.75182774                            |
| 515.4698492                                     | 81.47738693                                      | 75.8951005                                  | 65.29582231                            |
| 335.6623656                                     | 51.02150538                                      | 243.7806452                                 | 231.1895942                            |
| 444.1440985                                     | 82.52353367                                      | 44.1115134                                  | 34.18057206                            |
| 384.0921986                                     | 46.05572442                                      | 270.3748734                                 | 258.3542856                            |
| 231.7714286                                     | 42.55064935                                      | 88.14155844                                 | 74.75736381                            |
| 80.46382979                                     | 13.34042553                                      | 210.1234043                                 | 190.2735355                            |
| 50.75418994                                     | 13.22346369                                      | 135.5642458                                 | 113.8559346                            |
| 452.0772693                                     | 77.64066017                                      | 401.5828957                                 | 382.8202853                            |

| log.sigma.3.0.mm.3D_glszm_ZonePercentage | log.sigma.3.0.mm.3D_glszm_LargeAreaLowGrayLevelEmphasis | log.sigma.3.0.mm.3D_glszm_LargeAreaHighGrayLevelEmphasis | log.sigma.3.0.mm.3D_glszm_HighGrayLevelZoneEmphasis |
|------------------------------------------|---------------------------------------------------------|----------------------------------------------------------|-----------------------------------------------------|
| 0.400094251                              | 0.100309601                                             | 27570.3086                                               | 533.4640754                                         |
| 0.221390374                              | 2.260640181                                             | 27053.9372                                               | 155.352657                                          |
| 0.239895698                              | 0.931107098                                             | 15130.20924                                              | 184.0733696                                         |
| 0.358239509                              | 0.117460529                                             | 10555.67429                                              | 328.26                                              |
| 0.278716216                              | 0.405454981                                             | 28801.17424                                              | 273.4545455                                         |
| 0.315151515                              | 0.398664817                                             | 7654.355769                                              | 214.6201923                                         |
| 0.271456379                              | 0.364225573                                             | 44422.9987                                               | 446.2627119                                         |
| 0.250391543                              | 0.86949642                                              | 174217.2611                                              | 545.6559812                                         |
| 0.303343599                              | 0.141804255                                             | 33829.38651                                              | 508.1696882                                         |
| 0.320895522                              | 0.109557518                                             | 21771.96221                                              | 488.5843023                                         |
| 0.280503979                              | 0.507925979                                             | 12103.49409                                              | 160.713948                                          |
| 0.303253796                              | 0.206591608                                             | 26816.40629                                              | 405.1230329                                         |
| 0.172469202                              | 3.642365062                                             | 267348.1553                                              | 316.310559                                          |
| 0.29062318                               | 0.222718115                                             | 62961.05611                                              | 576.3426854                                         |
| 0.34375                                  | 0.166176385                                             | 31128.84311                                              | 424.4164223                                         |
| 0.27559415                               | 1.115033172                                             | 84341.82007                                              | 350.5389718                                         |
| 0.298157454                              | 0.213525949                                             | 11452.58146                                              | 238.2050562                                         |
| 0.199513382                              | 2.842607292                                             | 28338.69106                                              | 136.8252033                                         |
| 0.220338983                              | 2.017856038                                             | 25636.25175                                              | 145.2307692                                         |
| 0.292363916                              | 0.254049867                                             | 24468.59868                                              | 376.0671053                                         |
| 0.168650794                              | 4.417555798                                             | 130254.3863                                              | 213.7803922                                         |
| 0.247451344                              | 0.642651574                                             | 8229.906367                                              | 134.7715356                                         |
| 0.268554688                              | 0.830378983                                             | 16169.61091                                              | 192.0145455                                         |
| 0.271250472                              | 0.655485949                                             | 20527.35794                                              | 215.1908078                                         |
| 0.285938727                              | 0.274329649                                             | 31628.28846                                              | 409.905495                                          |
| 0.358801182                              | 0.075726651                                             | 20384.95059                                              | 595.2188235                                         |
| 0.313021961                              | 0.367397914                                             | 42183.39229                                              | 403.9703557                                         |
| 0.273352643                              | 0.712741073                                             | 89790.90728                                              | 394.5443709                                         |
| 0.241610738                              | 0.887071088                                             | 8051.546296                                              | 142.6203704                                         |
| 0.214216164                              | 0.86241701                                              | 43917.36591                                              | 231.6772727                                         |
| 0.261664565                              | 1.029917269                                             | 138221.6972                                              | 437.0746988                                         |
| 0.212179797                              | 1.219164225                                             | 151354.8383                                              | 316.9111617                                         |
| 0.326416847                              | 0.219088648                                             | 30230.12239                                              | 382.8235294                                         |
| 0.297446809                              | 0.264258856                                             | 25201.2289                                               | 360.550787                                          |
| 0.309945504                              | 0.336651795                                             | 20591                                                    | 313.5186813                                         |
| 0.237745915                              | 1.185199728                                             | 116678.1865                                              | 399.6619916                                         |
| 0.215533459                              | 1.208307235                                             | 437312.9227                                              | 617.4189526                                         |
| 0.242588646                              | 0.987781177                                             | 249702.0439                                              | 598.0838658                                         |
| 0.197560976                              | 1.061281116                                             | 28092.54321                                              | 137.3539095                                         |
| 0.315405777                              | 0.158045392                                             | 9466.560837                                              | 298.2145661                                         |
| 0.255204318                              | 0.871256296                                             | 95329.6858                                               | 297.5619335                                         |
| 0.406775278                              | 0.063167296                                             | 6034.656707                                              | 363.7552448                                         |
| 0.306597317                              | 0.163663736                                             | 16374.86964                                              | 355.6044643                                         |
| 0.319935691                              | 0.127141031                                             | 35761.53015                                              | 485.6457286                                         |
| 0.258998435                              | 0.732377579                                             | 17285.49245                                              | 204.7401813                                         |
| 0.323132969                              | 0.340566682                                             | 40373.28861                                              | 418.5422773                                         |
| 0.275317843                              | 0.654245432                                             | 69630.74682                                              | 409.9928344                                         |
| 0.21010333                               | 1.701059152                                             | 12091.31694                                              | 121.0163934                                         |
| 0.32079906                               | 0.194937875                                             | 7092.692308                                              | 206.010989                                          |
| 0.224852071                              | 3.109697008                                             | 28104.03618                                              | 170.6151316                                         |
| 0.308291164                              | 0.158723336                                             | 21567.16035                                              | 420.4040404                                         |
| 0.388015426                              | 0.082311998                                             | 5655.133028                                              | 311.2752294                                         |
| 0.285239362                              | 0.475609028                                             | 18898.68531                                              | 228.7179487                                         |
| 0.301630435                              | 0.860161323                                             | 7081.123123                                              | 155.1891892                                         |
| 0.311278195                              | 0.293693866                                             | 9717.350242                                              | 247.5434783                                         |
| 0.254358974                              | 0.313731386                                             | 98612.80645                                              | 560.8487903                                         |
| 0.330037083                              | 0.138326098                                             | 14245.3161                                               | 351.9558052                                         |
| 0.251590515                              | 0.588319834                                             | 97918.10115                                              | 407.6862069                                         |
| 0.286407767                              | 0.379974215                                             | 26568.17161                                              | 263.3135593                                         |
| 0.278453281                              | 0.428404501                                             | 80998.86192                                              | 504.4834776                                         |
| 0.253680634                              | 1.247017072                                             | 61684.80134                                              | 288.1183036                                         |
| 0.288014981                              | 0.369777356                                             | 43208.50715                                              | 389.1105332                                         |
| 0.318362411                              | 0.277309239                                             | 47626.76723                                              | 488.9918611                                         |
| 0.25974026                               | 0.244802275                                             | 53155.99444                                              | 558.05                                              |
| 0.246835443                              | 0.818467503                                             | 10118.81538                                              | 155.8410256                                         |
| 0.237182807                              | 0.919633324                                             | 159857.1223                                              | 498.9923581                                         |
| 0.187883436                              | 1.511982255                                             | 153181.6735                                              | 287.9755102                                         |
| 0.27248                                  | 0.426816044                                             | 102521.7663                                              | 505.4468585                                         |
| 0.312105173                              | 0.20372586                                              | 44899.34683                                              | 467.6630197                                         |
| 0.214975845                              | 2.073598815                                             | 79856.95024                                              | 231.4333868                                         |
| 0.27482679                               | 0.261775073                                             | 2297.194398                                              | 309.4845938                                         |
| 0.245920746                              | 0.748866297                                             | 105024.3412                                              | 459.7194313                                         |
| 0.273365511                              | 0.249394478                                             | 53535.11236                                              | 498.4510433                                         |
| 0.374501992                              | 0.136499813                                             | 17577.86879                                              | 338.1867612                                         |
| 0.360907058                              | 0.170147671                                             | 9446.631858                                              | 297.0672566                                         |
| 0.250372578                              | 0.239242221                                             | 28670.96726                                              | 303.5654762                                         |
| 0.22245409                               | 1.305892004                                             | 30830.65854                                              | 198.6097561                                         |
| 0.219206681                              | 1.012574479                                             | 28697.95714                                              | 227.8238095                                         |
| 0.26244874                               | 0.635380498                                             | 19758.22991                                              | 211.2276786                                         |
| 0.370671227                              | 0.058772834                                             | 13623.94464                                              | 461.1349481                                         |
| 0.396178984                              | 0.119973532                                             | 26222.09137                                              | 498.5126904                                         |
| 0.30405781                               | 0.811139456                                             | 28226.12249                                              | 198.6124314                                         |
| 0.257265219                              | 0.742752726                                             | 76226.94293                                              | 387.9381688                                         |
| 0.211194273                              | 0.983046729                                             | 47704.47612                                              | 212.3143297                                         |
| 0.329643296                              | 0.227415025                                             | 17631.33333                                              | 289.0248756                                         |
| 0.131853786                              | 4.799571031                                             | 178181.0446                                              | 224.0247525                                         |
| 0.319077568                              | 0.315135725                                             | 50089.27595                                              | 372.2260184                                         |
| 0.274981765                              | 1.111122366                                             | 34671.08753                                              | 249.7214854                                         |
| 0.260928962                              | 0.302673162                                             | 13683.96859                                              | 245.8376963                                         |
| 0.238518519                              | 0.780585966                                             | 90179.92133                                              | 348.7142857                                         |
| 0.175613497                              | 10.15819323                                             | 51988.24891                                              | 140.5021834                                         |
| 0.35852225                               | 0.149225881                                             | 8032.802108                                              | 270.2025761                                         |
| 0.307158017                              | 0.197368422                                             | 30963.79397                                              | 399.0604704                                         |
| 0.281818182                              | 0.713749383                                             | 85155.88495                                              | 376.4526882                                         |
| 0.317325368                              | 0.155920952                                             | 14025.39464                                              | 285.3801593                                         |
| 0.28842782                               | 0.581228061                                             | 128384.2128                                              | 532.8125633                                         |
| 0.273340433                              | 0.45246986                                              | 19296.45584                                              | 225.161039                                          |
| 0.224450812                              | 0.629844988                                             | 74262.02128                                              | 295.9446809                                         |
| 0.214628297                              | 0.666800195                                             | 29181.44134                                              | 175.0502793                                         |
| 0.230862487                              | 1.828571713                                             | 90125.57089                                              | 302.3675919                                         |

| log.sigma.3.0.mm.3D_glszm_SmallAreaEmphasis | log.sigma.3.0.mm.3D_glszm_LowGrayLevelZoneEmphasis | log.sigma.3.0.mm.3D_glszm_ZoneEntropy | log.sigma.3.0.mm.3D_glszm_SmallAreaLowGrayLevelEmphasis |
|---------------------------------------------|----------------------------------------------------|---------------------------------------|---------------------------------------------------------|
| 0.665942694                                 | 0.005718237                                        | 6.410028539                           | 0.004327761                                             |
| 0.533783859                                 | 0.023723705                                        | 5.997975708                           | 0.014794552                                             |
| 0.581437991                                 | 0.016687761                                        | 6.240160901                           | 0.01207831                                              |
| 0.614614432                                 | 0.01013072                                         | 6.190058041                           | 0.007808378                                             |
| 0.601989624                                 | 0.011413346                                        | 6.3829336                             | 0.007763098                                             |
| 0.607078917                                 | 0.01577888                                         | 5.962623721                           | 0.008470017                                             |
| 0.590263621                                 | 0.003871302                                        | 6.686436445                           | 0.002708308                                             |
| 0.587857798                                 | 0.003383017                                        | 6.673907528                           | 0.002413204                                             |
| 0.598906672                                 | 0.003412482                                        | 6.563569065                           | 0.002414867                                             |
| 0.611323819                                 | 0.006464375                                        | 6.191530587                           | 0.005445142                                             |
| 0.582232573                                 | 0.014845215                                        | 6.03608342                            | 0.010428906                                             |
| 0.626904317                                 | 0.006409065                                        | 6.453172104                           | 0.005097151                                             |
| 0.579059691                                 | 0.009855654                                        | 6.318176175                           | 0.007292359                                             |
| 0.588668489                                 | 0.007514153                                        | 6.594652352                           | 0.006458089                                             |
| 0.642444221                                 | 0.00580584                                         | 6.354423168                           | 0.004691326                                             |
| 0.610031121                                 | 0.006339179                                        | 6.519558022                           | 0.004008473                                             |
| 0.574625043                                 | 0.01350644                                         | 6.269702296                           | 0.008175461                                             |
| 0.563356127                                 | 0.027493923                                        | 5.926772008                           | 0.020707268                                             |
| 0.554334482                                 | 0.014427669                                        | 5.982367264                           | 0.01005942                                              |
| 0.581675408                                 | 0.005123725                                        | 6.723101411                           | 0.003519618                                             |
| 0.553761256                                 | 0.011167386                                        | 6.346200943                           | 0.00761249                                              |
| 0.537985986                                 | 0.022393583                                        | 6.126362314                           | 0.015957482                                             |
| 0.600884653                                 | 0.015027221                                        | 6.063485254                           | 0.010705231                                             |
| 0.570798271                                 | 0.011227906                                        | 6.446463183                           | 0.007081204                                             |
| 0.623734132                                 | 0.011214927                                        | 6.27089635                            | 0.010029237                                             |
| 0.627821534                                 | 0.003968675                                        | 6.621822661                           | 0.003055584                                             |
| 0.63499673                                  | 0.008317969                                        | 6.584815577                           | 0.005966977                                             |
| 0.583809653                                 | 0.005262179                                        | 6.53988926                            | 0.003840244                                             |
| 0.48455741                                  | 0.022446449                                        | 5.679526711                           | 0.017316713                                             |
| 0.567170043                                 | 0.015936532                                        | 6.386712066                           | 0.013537379                                             |
| 0.619200435                                 | 0.005481656                                        | 6.507724639                           | 0.004282956                                             |
| 0.570636548                                 | 0.008200388                                        | 6.214720425                           | 0.00401426                                              |
| 0.623220398                                 | 0.006385998                                        | 6.562720692                           | 0.003949004                                             |
| 0.589503276                                 | 0.012087678                                        | 6.55492429                            | 0.006915538                                             |
| 0.6084409                                   | 0.007333106                                        | 6.531565476                           | 0.004795458                                             |
| 0.604756082                                 | 0.005615655                                        | 6.421286522                           | 0.003172057                                             |
| 0.615865622                                 | 0.003600285                                        | 6.530574908                           | 0.002831249                                             |
| 0.602097724                                 | 0.003273116                                        | 6.691276863                           | 0.002363555                                             |
| 0.51588024                                  | 0.021753892                                        | 6.063445337                           | 0.014215355                                             |
| 0.570957733                                 | 0.006219424                                        | 6.827762549                           | 0.003757388                                             |
| 0.613990328                                 | 0.008778639                                        | 6.381312044                           | 0.006043688                                             |
| 0.63021694                                  | 0.005105447                                        | 6.536975121                           | 0.00351179                                              |
| 0.592465468                                 | 0.006319337                                        | 6.59123547                            | 0.00457714                                              |
| 0.618355563                                 | 0.004162301                                        | 6.451596776                           | 0.003181546                                             |
| 0.565366668                                 | 0.015145083                                        | 6.307911329                           | 0.01180274                                              |
| 0.637600728                                 | 0.004958326                                        | 6.340964227                           | 0.00370251                                              |
| 0.60154608                                  | 0.005107973                                        | 6.580549068                           | 0.003186392                                             |
| 0.503609128                                 | 0.027633175                                        | 6.074733839                           | 0.016228586                                             |
| 0.547078937                                 | 0.016411718                                        | 6.201393245                           | 0.012026364                                             |
| 0.553927685                                 | 0.020402948                                        | 6.193516511                           | 0.015517641                                             |
| 0.575564276                                 | 0.006042978                                        | 6.636667693                           | 0.004287702                                             |
| 0.6039183                                   | 0.006780009                                        | 6.560200503                           | 0.00393134                                              |
| 0.581883227                                 | 0.009331475                                        | 6.488406552                           | 0.006273008                                             |
| 0.593008945                                 | 0.025908003                                        | 6.065828084                           | 0.018819149                                             |
| 0.582515241                                 | 0.009934831                                        | 6.253878902                           | 0.007386622                                             |
| 0.560867434                                 | 0.004547221                                        | 6.548827529                           | 0.003621053                                             |
| 0.609594141                                 | 0.006022947                                        | 6.553169055                           | 0.00436393                                              |
| 0.596115828                                 | 0.006074845                                        | 6.616464861                           | 0.004393277                                             |
| 0.608838988                                 | 0.010408171                                        | 6.244316552                           | 0.007757868                                             |
| 0.601356654                                 | 0.003365744                                        | 6.678910101                           | 0.002290789                                             |
| 0.602187717                                 | 0.008311463                                        | 6.349823422                           | 0.006222429                                             |
| 0.609657738                                 | 0.005311937                                        | 6.360204635                           | 0.004018479                                             |
| 0.624338641                                 | 0.003710463                                        | 6.504714974                           | 0.002603186                                             |
| 0.570488842                                 | 0.002988202                                        | 6.846191737                           | 0.002021135                                             |
| 0.530988767                                 | 0.017644905                                        | 5.989410812                           | 0.011844606                                             |
| 0.594200477                                 | 0.005317516                                        | 6.655440395                           | 0.003990623                                             |
| 0.582770138                                 | 0.011434705                                        | 5.988203145                           | 0.008989078                                             |
| 0.592581479                                 | 0.003393697                                        | 6.758182094                           | 0.001811908                                             |
| 0.641161297                                 | 0.00368486                                         | 6.49363529                            | 0.002727179                                             |
| 0.600886631                                 | 0.011046464                                        | 6.25339047                            | 0.008581491                                             |
| 0.559716791                                 | 0.009522351                                        | 6.297909657                           | 0.006290129                                             |
| 0.606377889                                 | 0.004983718                                        | 6.65820343                            | 0.003893243                                             |
| 0.577698465                                 | 0.005640215                                        | 6.577269473                           | 0.004275467                                             |
| 0.623964113                                 | 0.009368091                                        | 6.455963348                           | 0.0058762                                               |
| 0.612217741                                 | 0.007106016                                        | 6.524642052                           | 0.004739299                                             |
| 0.568669471                                 | 0.010025465                                        | 6.259581495                           | 0.005843276                                             |
| 0.591873658                                 | 0.010896016                                        | 6.224537606                           | 0.007746891                                             |
| 0.547981555                                 | 0.014891646                                        | 6.244533375                           | 0.010819441                                             |
| 0.555582429                                 | 0.013793514                                        | 6.323924538                           | 0.008582962                                             |
| 0.619340511                                 | 0.005171478                                        | 6.536037653                           | 0.003862934                                             |
| 0.656763241                                 | 0.006005063                                        | 6.369266983                           | 0.004098162                                             |
| 0.651224538                                 | 0.018864794                                        | 6.174948009                           | 0.012437935                                             |
| 0.584855242                                 | 0.006529878                                        | 6.549624586                           | 0.003921769                                             |
| 0.508794497                                 | 0.009710113                                        | 6.527377683                           | 0.004631594                                             |
| 0.599082029                                 | 0.008817377                                        | 6.481734497                           | 0.005876749                                             |
| 0.461255616                                 | 0.011484283                                        | 6.080476829                           | 0.008025027                                             |
| 0.60409336                                  | 0.007708732                                        | 6.551835525                           | 0.005942982                                             |
| 0.573795465                                 | 0.012837331                                        | 6.474599827                           | 0.003934784                                             |
| 0.560349189                                 | 0.013166759                                        | 6.350712628                           | 0.010162973                                             |
| 0.590256818                                 | 0.009601443                                        | 6.374493035                           | 0.007909997                                             |
| 0.610899131                                 | 0.01826565                                         | 5.672801667                           | 0.013624485                                             |
| 0.606106679                                 | 0.008371439                                        | 6.35853773                            | 0.005986666                                             |
| 0.587272422                                 | 0.005351257                                        | 6.702485503                           | 0.003859133                                             |
| 0.623941552                                 | 0.005905094                                        | 6.418150378                           | 0.004526309                                             |
| 0.5857522                                   | 0.006702283                                        | 6.499420001                           | 0.004473613                                             |
| 0.648529546                                 | 0.004628446                                        | 6.552790892                           | 0.003666556                                             |
| 0.565861387                                 | 0.010700532                                        | 6.581668102                           | 0.006697813                                             |
| 0.606321957                                 | 0.01282945                                         | 6.11552546                            | 0.010317913                                             |
| 0.546657747                                 | 0.015421709                                        | 5.932904661                           | 0.01198988                                              |
| 0.604020776                                 | 0.006248872                                        | 6.463681316                           | 0.004327403                                             |



| log.sigma.3.0.mm.3D_ngtdm_Coarseness | log.sigma.3.0.mm.3D_ngtdm_Complexity | log.sigma.3.0.mm.3D_ngtdm_Strength | log.sigma.3.0.mm.3D_ngtdm_Busyness | log.sigma.3.0.mm.3D_ngtdm_Contrast |
|--------------------------------------|--------------------------------------|------------------------------------|------------------------------------|------------------------------------|
| 0.004280934                          | 0.70064243                           | 2.38185685                         | 0.210749167                        | 5.29E-05                           |
| 0.009532241                          | 0.284794497                          | 1.729468998                        | 0.370353645                        | 6.38E-05                           |
| 0.006887068                          | 0.264589761                          | 1.631606353                        | 0.388078834                        | 3.96E-05                           |
| 0.010427348                          | 0.849229516                          | 3.608487663                        | 0.14364225                         | 0.00010479                         |
| 0.003829046                          | 0.240343645                          | 1.119997785                        | 0.468545804                        | 3.04E-05                           |
| 0.014034037                          | 0.814215351                          | 3.647799112                        | 0.202524074                        | 0.00017515                         |
| 0.0001714529                         | 0.172618568                          | 0.985554742                        | 0.604700165                        | 7.74E-06                           |
| 0.002013888                          | 0.169023483                          | 1.047326216                        | 0.477125704                        | 9.14E-06                           |
| 0.002123821                          | 0.222209544                          | 1.063783968                        | 0.470861543                        | 1.26E-05                           |
| 0.00912029                           | 0.698731488                          | 3.969515687                        | 0.133825627                        | 6.24E-05                           |
| 0.005871675                          | 0.199798241                          | 0.99318583                         | 0.552980328                        | 4.88E-05                           |
| 0.004005868                          | 0.394626715                          | 1.929781877                        | 0.289569475                        | 2.69E-05                           |
| 0.005401634                          | 0.23216883                           | 2.087639914                        | 0.269013574                        | 2.09E-05                           |
| 0.006046198                          | 0.677379933                          | 3.81512896                         | 0.136860657                        | 3.55E-05                           |
| 0.004449694                          | 0.605859458                          | 2.321410755                        | 0.225908952                        | 3.76E-05                           |
| 0.00233352                           | 0.183518887                          | 0.942239299                        | 0.583254028                        | 1.41E-05                           |
| 0.008110134                          | 0.40984205                           | 1.926763283                        | 0.255323689                        | 7.31E-05                           |
| 0.00819624                           | 0.204606975                          | 1.388170594                        | 0.476379218                        | 5.71E-05                           |
| 0.006846439                          | 0.169290733                          | 0.994633653                        | 0.577651706                        | 4.67E-05                           |
| 0.001963726                          | 0.160235006                          | 0.890972173                        | 0.654539339                        | 1.10E-05                           |
| 0.003554362                          | 0.117827821                          | 1.101181012                        | 0.572016665                        | 1.11E-05                           |
| 0.008564947                          | 0.212336233                          | 1.117010614                        | 0.527085036                        | 7.57E-05                           |
| 0.009273988                          | 0.377782805                          | 2.074660699                        | 0.28795653                         | 6.67E-05                           |
| 0.003540216                          | 0.198305901                          | 1.03975722                         | 0.588267979                        | 2.03E-05                           |
| 0.007310117                          | 0.67212883                           | 3.218023394                        | 0.163363501                        | 4.78E-05                           |
| 0.00415141                           | 0.614579103                          | 2.870120099                        | 0.189308049                        | 2.66E-05                           |
| 0.003033094                          | 0.351365984                          | 1.614336784                        | 0.363366606                        | 2.24E-05                           |
| 0.003580441                          | 0.26345915                           | 1.428999408                        | 0.339344982                        | 1.89E-05                           |
| 0.019471132                          | 0.465816314                          | 2.642868129                        | 0.257158597                        | 0.00017909                         |
| 0.004550732                          | 0.18723643                           | 1.283594074                        | 0.4297098                          | 2.05E-05                           |
| 0.002044084                          | 0.190715002                          | 1.067149319                        | 0.514795449                        | 9.91E-06                           |
| 0.004591322                          | 0.304915973                          | 1.927392364                        | 0.259657052                        | 1.93E-05                           |
| 0.003169482                          | 0.308599532                          | 1.396861501                        | 0.384774054                        | 2.50E-05                           |
| 0.004157275                          | 0.316558075                          | 1.531305828                        | 0.338404804                        | 3.63E-05                           |
| 0.002217283                          | 0.177354962                          | 0.872488343                        | 0.677075923                        | 1.38E-05                           |
| 0.003301571                          | 0.245085266                          | 1.587671254                        | 0.351323549                        | 1.39E-05                           |
| 0.002725467                          | 0.272726305                          | 2.052338926                        | 0.253312763                        | 8.58E-06                           |
| 0.002162351                          | 0.210024892                          | 1.428554469                        | 0.367743554                        | 9.23E-06                           |
| 0.006733151                          | 0.179032106                          | 1.076155367                        | 0.470800748                        | 3.48E-05                           |
| 0.001479051                          | 0.099100356                          | 0.480255745                        | 1.245487715                        | 1.19E-05                           |
| 0.003876941                          | 0.266465875                          | 1.548778788                        | 0.328515771                        | 2.14E-05                           |
| 0.002481608                          | 0.332136322                          | 1.25769394                         | 0.516484831                        | 2.25E-05                           |
| 0.002635853                          | 0.227433068                          | 0.982520325                        | 0.535540665                        | 1.98E-05                           |
| 0.003604224                          | 0.487958199                          | 2.092467267                        | 0.245727327                        | 2.33E-05                           |
| 0.007374845                          | 0.342209977                          | 1.842456459                        | 0.357043503                        | 5.76E-05                           |
| 0.003365345                          | 0.324304377                          | 1.40381673                         | 0.368727606                        | 2.54E-05                           |
| 0.002170529                          | 0.182889166                          | 1.012726322                        | 0.538377556                        | 1.10E-05                           |
| 0.011328761                          | 0.211228945                          | 1.681998275                        | 0.396509354                        | 5.97E-05                           |
| 0.010897872                          | 0.510671075                          | 2.267989944                        | 0.24355208                         | 0.00012161                         |
| 0.007286972                          | 0.297379953                          | 1.992839982                        | 0.392299774                        | 4.21E-05                           |
| 0.00376612                           | 0.344546638                          | 1.615612443                        | 0.328462812                        | 2.89E-05                           |
| 0.00270562                           | 0.31086128                           | 1.113965956                        | 0.545305594                        | 2.59E-05                           |
| 0.001961532                          | 0.125317617                          | 0.586695757                        | 1.015905784                        | 1.40E-05                           |
| 0.008125587                          | 0.36900847                           | 1.549831958                        | 0.457083312                        | 8.59E-05                           |
| 0.006803988                          | 0.420316574                          | 1.696468288                        | 0.354475878                        | 6.72E-05                           |
| 0.005005383                          | 0.377053631                          | 2.519784126                        | 0.1964178                          | 2.40E-05                           |
| 0.002433168                          | 0.188966036                          | 0.840794529                        | 0.618292108                        | 2.00E-05                           |
| 0.003031289                          | 0.216447358                          | 1.429405615                        | 0.363198046                        | 1.55E-05                           |
| 0.005727323                          | 0.338431344                          | 1.573226397                        | 0.305719175                        | 4.01E-05                           |
| 0.00110904                           | 0.128566002                          | 0.661118334                        | 0.805421356                        | 5.33E-06                           |
| 0.005496003                          | 0.387784728                          | 2.613473612                        | 0.274581364                        | 2.65E-05                           |
| 0.003537824                          | 0.280595109                          | 1.493799732                        | 0.355395666                        | 1.95E-05                           |
| 0.001581318                          | 0.188007781                          | 0.900778317                        | 0.620374121                        | 9.48E-06                           |
| 0.001405858                          | 0.134423468                          | 0.899818423                        | 0.620398045                        | 5.38E-06                           |
| 0.011817377                          | 0.341582566                          | 1.698806363                        | 0.354450098                        | 0.000108589                        |
| 0.002758269                          | 0.231571443                          | 1.742445724                        | 0.320336154                        | 9.13E-06                           |
| 0.007146221                          | 0.345614137                          | 2.796366321                        | 0.19435126                         | 2.28E-05                           |
| 0.001643651                          | 0.183475316                          | 1.079912776                        | 0.51321787                         | 7.13E-06                           |
| 0.001730336                          | 0.172533137                          | 1.051798815                        | 0.522528793                        | 7.57E-06                           |
| 0.003377396                          | 0.122048397                          | 0.843877681                        | 0.628547279                        | 1.45E-05                           |
| 0.007312754                          | 0.465037374                          | 2.400376972                        | 0.215573138                        | 5.01E-05                           |
| 0.00241119                           | 0.2134014                            | 1.330093048                        | 0.419257443                        | 1.09E-05                           |
| 0.004278926                          | 0.412430335                          | 2.405713602                        | 0.222959933                        | 2.39E-05                           |
| 0.004205804                          | 0.409111739                          | 1.414068209                        | 0.342344689                        | 5.20E-05                           |
| 0.002981932                          | 0.298940041                          | 1.147751799                        | 0.562619871                        | 2.83E-05                           |
| 0.006452575                          | 0.390159026                          | 2.308005177                        | 0.235159667                        | 4.97E-05                           |
| 0.004090692                          | 0.1438255                            | 0.975383659                        | 0.592738026                        | 1.78E-05                           |
| 0.011519152                          | 0.401765414                          | 3.177400338                        | 0.191175302                        | 5.40E-05                           |
| 0.005529019                          | 0.229380836                          | 1.260057306                        | 0.438366759                        | 3.48E-05                           |
| 0.00411679                           | 0.46045253                           | 1.958138919                        | 0.258088487                        | 4.27E-05                           |
| 0.004591265                          | 0.683465963                          | 2.393031546                        | 0.212027175                        | 5.85E-05                           |
| 0.005466693                          | 0.387698559                          | 1.839750027                        | 0.355303038                        | 3.85E-05                           |
| 0.00299527                           | 0.242108859                          | 1.28844682                         | 0.410861286                        | 1.62E-05                           |
| 0.003336815                          | 0.104105398                          | 0.750630281                        | 0.701176588                        | 1.73E-05                           |
| 0.003912148                          | 0.371833415                          | 1.540006987                        | 0.387966907                        | 3.36E-05                           |
| 0.00677223                           | 0.11330166                           | 1.173950765                        | 0.434244553                        | 2.86E-05                           |
| 0.004114481                          | 0.352509949                          | 1.553166181                        | 0.313601292                        | 4.04E-05                           |
| 0.003646624                          | 0.178052916                          | 0.920537396                        | 0.617476582                        | 2.94E-05                           |
| 0.006334943                          | 0.339433502                          | 1.992333512                        | 0.29309006                         | 3.61E-05                           |
| 0.005097648                          | 0.292504724                          | 2.158602947                        | 0.25218003                         | 2.23E-05                           |
| 0.007203645                          | 0.155733998                          | 1.228293866                        | 0.659706382                        | 5.11E-05                           |
| 0.003907998                          | 0.277120582                          | 1.125894084                        | 0.522072119                        | 4.05E-05                           |
| 0.001907762                          | 0.182624019                          | 0.929615832                        | 0.561542227                        | 1.11E-05                           |
| 0.002943002                          | 0.223021969                          | 1.257746217                        | 0.422216876                        | 1.63E-05                           |
| 0.002149331                          | 0.145715245                          | 0.665877678                        | 0.773500218                        | 1.59E-05                           |
| 0.003013412                          | 0.32960827                           | 1.874628765                        | 0.285139233                        | 1.68E-05                           |
| 0.003594393                          | 0.18200865                           | 1.011909341                        | 0.603289852                        | 2.50E-05                           |
| 0.00927409                           | 0.483250855                          | 3.26422176                         | 0.15465898                         | 5.97E-05                           |
| 0.011428816                          | 0.276182237                          | 2.004160273                        | 0.243800669                        | 6.17E-05                           |
| 0.00164517                           | 0.106833777                          | 0.599454774                        | 0.975528675                        | 8.34E-06                           |

| log.sigma.2.5.mm.3D_gldm_GrayLevelVariance | log.sigma.2.5.mm.3D_gldm_HighGrayLevelEmphasis | log.sigma.2.5.mm.3D_gldm_GrayLevelNonUniformityNormalized | log.sigma.2.5.mm.3D_gldm_DependenceEntropy |
|--------------------------------------------|------------------------------------------------|-----------------------------------------------------------|--------------------------------------------|
| 31.38384378                                | 549.9868049                                    | 0.062691822                                               | 6.703397399                                |
| 10.18881409                                | 197.0737968                                    | 0.116762847                                               | 6.28381197                                 |
| 12.40565096                                | 150.0013038                                    | 0.093492314                                               | 6.666778735                                |
| 23.83230054                                | 365.7226203                                    | 0.068154032                                               | 6.606619322                                |
| 15.82187043                                | 337.7576014                                    | 0.084749789                                               | 6.610843623                                |
| 22.50189164                                | 303.1151515                                    | 0.071354454                                               | 6.362019662                                |
| 15.13838844                                | 436.1033445                                    | 0.086103342                                               | 6.704215973                                |
| 15.70288396                                | 447.0700861                                    | 0.091381217                                               | 6.670849841                                |
| 17.65114935                                | 535.2186538                                    | 0.073759094                                               | 6.775022802                                |
| 16.78490477                                | 343.6119403                                    | 0.078239864                                               | 6.411089231                                |
| 10.94632693                                | 183.6909814                                    | 0.092981552                                               | 6.297250934                                |
| 19.3326412                                 | 509.5180043                                    | 0.078513276                                               | 6.606925289                                |
| 11.68328729                                | 291.7032673                                    | 0.148178165                                               | 6.432061892                                |
| 23.12714168                                | 713.987187                                     | 0.079720456                                               | 6.690559                                   |
| 22.45913172                                | 438.2983871                                    | 0.077770856                                               | 6.524117697                                |
| 16.46285184                                | 347.6928702                                    | 0.088541789                                               | 6.718783118                                |
| 16.26155414                                | 241.9907873                                    | 0.076131635                                               | 6.386883172                                |
| 11.10439528                                | 187.8240065                                    | 0.120350144                                               | 6.370515068                                |
| 8.483396882                                | 179.472265                                     | 0.107036783                                               | 6.304322014                                |
| 17.9064988                                 | 408.0644355                                    | 0.077466441                                               | 6.737499831                                |
| 9.429403288                                | 241.0347222                                    | 0.122560521                                               | 6.595411215                                |
| 10.37205012                                | 194.6923077                                    | 0.09247484                                                | 6.260016129                                |
| 13.10247803                                | 278.9453125                                    | 0.094091415                                               | 6.360661645                                |
| 12.46755057                                | 222.5039668                                    | 0.086695718                                               | 6.551694188                                |
| 16.88215268                                | 498.7415554                                    | 0.090088483                                               | 6.490235149                                |
| 25.1306119                                 | 475.4157873                                    | 0.065297663                                               | 6.668120311                                |
| 22.92133733                                | 446.8252397                                    | 0.071700754                                               | 6.825065896                                |
| 15.56010334                                | 418.9706734                                    | 0.090346069                                               | 6.567369589                                |
| 10.01652578                                | 190.3087248                                    | 0.096897537                                               | 5.993742968                                |
| 10.08990106                                | 313.1786758                                    | 0.109556104                                               | 6.33945328                                 |
| 15.91956416                                | 528.1740227                                    | 0.090733052                                               | 6.699227897                                |
| 12.37302059                                | 309.79797                                      | 0.117339183                                               | 6.417568504                                |
| 22.99586331                                | 416.9489006                                    | 0.067151102                                               | 6.890201348                                |
| 20.21488981                                | 473.6148936                                    | 0.078205885                                               | 6.731368722                                |
| 17.69750912                                | 350.4037239                                    | 0.073772316                                               | 6.657730061                                |
| 13.63185772                                | 288.1257086                                    | 0.101645864                                               | 6.554261133                                |
| 15.23357996                                | 617.1109917                                    | 0.111080504                                               | 6.623241824                                |
| 18.38429067                                | 458.6277853                                    | 0.103360834                                               | 6.9783983                                  |
| 7.67281975                                 | 224.4804878                                    | 0.115912486                                               | 6.004503883                                |
| 19.25782192                                | 271.4514443                                    | 0.065247848                                               | 6.779813008                                |
| 15.4881559                                 | 284.1877409                                    | 0.102627854                                               | 6.549535085                                |
| 25.32439627                                | 273.8249289                                    | 0.057424292                                               | 6.694621267                                |
| 17.87575591                                | 370.2419929                                    | 0.073521503                                               | 6.686085616                                |
| 20.28026424                                | 594.6993569                                    | 0.079126754                                               | 6.594408375                                |
| 15.41631706                                | 286.5571205                                    | 0.088001842                                               | 6.393367849                                |
| 17.84985584                                | 417.5584699                                    | 0.077450971                                               | 6.628781426                                |
| 16.4508489                                 | 401.5377028                                    | 0.085703218                                               | 6.636630377                                |
| 8.630669843                                | 164.3214696                                    | 0.118304969                                               | 6.188604901                                |
| 18.65325234                                | 262.7250294                                    | 0.074494512                                               | 6.426813626                                |
| 12.71454464                                | 180.5051775                                    | 0.098557692                                               | 6.468528041                                |
| 20.85367606                                | 519.7473725                                    | 0.071364857                                               | 6.615196248                                |
| 22.67888382                                | 325.7342035                                    | 0.063898798                                               | 6.620884189                                |
| 13.96240443                                | 215.4614362                                    | 0.084852431                                               | 6.505651549                                |
| 13.71783436                                | 191.1576087                                    | 0.084626392                                               | 6.379810545                                |
| 15.8600424                                 | 340.9165414                                    | 0.0739974                                                 | 6.457862365                                |
| 14.49775148                                | 510.0738462                                    | 0.092002104                                               | 6.501963306                                |
| 18.84068604                                | 369.7475896                                    | 0.07106327                                                | 6.616650876                                |
| 16.36772661                                | 444.7547715                                    | 0.094062402                                               | 6.627108065                                |
| 15.36911909                                | 297.5194175                                    | 0.089153372                                               | 6.39752723                                 |
| 18.67547043                                | 488.6992004                                    | 0.072923495                                               | 6.954864486                                |
| 14.84565897                                | 315.002265                                     | 0.109070411                                               | 6.575900016                                |
| 15.29510317                                | 402.559176                                     | 0.086748306                                               | 6.56725465                                 |
| 17.60902911                                | 416.1869062                                    | 0.078576452                                               | 6.682595754                                |
| 16.89417709                                | 549.1335432                                    | 0.081326665                                               | 6.777012155                                |
| 10.63526518                                | 126.1025316                                    | 0.093690114                                               | 6.257383239                                |
| 14.84804577                                | 495.1864319                                    | 0.102426651                                               | 6.641851018                                |
| 9.94571152                                 | 423.5253067                                    | 0.128517963                                               | 6.297481638                                |
| 17.89085494                                | 449.04784                                      | 0.083591168                                               | 6.779595622                                |
| 17.26999556                                | 434.4072051                                    | 0.078022504                                               | 6.661611316                                |
| 9.254973326                                | 305.0403727                                    | 0.114973273                                               | 6.393951051                                |
| 14.47039323                                | 301.8498845                                    | 0.085952894                                               | 6.463094818                                |
| 16.39899419                                | 414.1736597                                    | 0.089368239                                               | 6.686808781                                |
| 18.36301804                                | 568.5423431                                    | 0.084011236                                               | 6.703797734                                |
| 26.44524553                                | 363.2709163                                    | 0.063863576                                               | 6.670891086                                |
| 21.5121647                                 | 271.0229958                                    | 0.062384062                                               | 6.719685813                                |
| 14.36098667                                | 409.5469449                                    | 0.100410669                                               | 6.315010897                                |
| 9.718266532                                | 252.5108514                                    | 0.105743504                                               | 6.439029739                                |
| 12.97389307                                | 217.302714                                     | 0.107528733                                               | 6.358807665                                |
| 11.78992803                                | 274.9630931                                    | 0.096339584                                               | 6.398928694                                |
| 25.75599392                                | 568.4527576                                    | 0.065102567                                               | 6.648927286                                |
| 30.88873874                                | 550.97637                                      | 0.064145409                                               | 6.705357699                                |
| 18.17833884                                | 249.475264                                     | 0.084344616                                               | 6.652442488                                |
| 15.36241869                                | 392.6059957                                    | 0.087281068                                               | 6.746808861                                |
| 10.07661514                                | 207.3726001                                    | 0.096373323                                               | 6.456923379                                |
| 20.64969495                                | 349.1225912                                    | 0.069217736                                               | 6.741130231                                |
| 6.835428611                                | 257.6194517                                    | 0.148272877                                               | 6.361263622                                |
| 22.49799964                                | 390.9287212                                    | 0.075427572                                               | 6.817345964                                |
| 15.9364763                                 | 348.8326039                                    | 0.083267762                                               | 6.65608306                                 |
| 13.09400428                                | 323.6864754                                    | 0.094730732                                               | 6.501631055                                |
| 13.63077433                                | 464.7264198                                    | 0.101980796                                               | 6.595367806                                |
| 9.126180888                                | 187.3404908                                    | 0.14581373                                                | 6.156574909                                |
| 18.95074449                                | 315.7388749                                    | 0.067784835                                               | 6.571510468                                |
| 19.12591257                                | 406.8427552                                    | 0.077179066                                               | 6.662096787                                |
| 15.44318641                                | 325.950303                                     | 0.087600184                                               | 6.653444152                                |
| 16.31135026                                | 362.0730699                                    | 0.075754977                                               | 6.549575435                                |
| 21.42518952                                | 565.4924021                                    | 0.083950551                                               | 6.839089115                                |
| 15.18801626                                | 265.3038694                                    | 0.080960984                                               | 6.601663901                                |
| 15.42967263                                | 452.3075454                                    | 0.110970627                                               | 6.357580555                                |
| 8.75481945                                 | 217.4436451                                    | 0.11417916                                                | 6.234752646                                |
| 12.05719259                                | 287.6608937                                    | 0.108325498                                               | 6.62365083                                 |

| log.sigma.2.5.mm.3D_gldm_DependenceNonUniformity | log.sigma.2.5.mm.3D_gldm_GrayLevelNonUniformity | log.sigma.2.5.mm.3D_gldm_SmallDependenceEmphasis |
|--------------------------------------------------|-------------------------------------------------|--------------------------------------------------|
| 414.8228087                                      | 133.0320452                                     | 0.369037288                                      |
| 112.428877                                       | 109.173262                                      | 0.204991784                                      |
| 187.9243807                                      | 143.4172099                                     | 0.211353584                                      |
| 163.0429887                                      | 66.58648925                                     | 0.288321466                                      |
| 364.1342905                                      | 200.6875                                        | 0.272184386                                      |
| 123.169697                                       | 47.09393939                                     | 0.297448433                                      |
| 823.3029552                                      | 486.5699876                                     | 0.256844998                                      |
| 686.8003132                                      | 466.7752545                                     | 0.246061934                                      |
| 720.8073031                                      | 335.3088429                                     | 0.280435396                                      |
| 189.1996269                                      | 83.87313433                                     | 0.296770997                                      |
| 236.6591512                                      | 140.2161804                                     | 0.256245107                                      |
| 374.1843818                                      | 180.973102                                      | 0.299558003                                      |
| 175.3760043                                      | 276.6486342                                     | 0.177562588                                      |
| 265.7874199                                      | 136.8800233                                     | 0.282319105                                      |
| 332.0514113                                      | 154.297379                                      | 0.304555161                                      |
| 593.0685558                                      | 387.4588665                                     | 0.248059604                                      |
| 216.0251256                                      | 90.90117253                                     | 0.291163075                                      |
| 138.3657745                                      | 148.3917275                                     | 0.195399361                                      |
| 182.2989214                                      | 138.9337442                                     | 0.218973427                                      |
| 808.0044239                                      | 402.7480285                                     | 0.270619308                                      |
| 310.797619                                       | 370.6230159                                     | 0.168858896                                      |
| 175.0611677                                      | 99.78035218                                     | 0.252615558                                      |
| 147.0546875                                      | 96.34960938                                     | 0.249658722                                      |
| 403.2017378                                      | 229.4835663                                     | 0.244842137                                      |
| 188.6433621                                      | 114.6826394                                     | 0.262721928                                      |
| 447.883073                                       | 154.6901646                                     | 0.320676726                                      |
| 514.9554593                                      | 231.808537                                      | 0.295109483                                      |
| 396.0550326                                      | 249.5358436                                     | 0.264065997                                      |
| 77.56375839                                      | 43.31319911                                     | 0.270821024                                      |
| 283.677702                                       | 225.0282376                                     | 0.21738904                                       |
| 630.06095                                        | 431.7078604                                     | 0.250309132                                      |
| 249.2754954                                      | 242.7747704                                     | 0.221858769                                      |
| 528.3440694                                      | 216.8309074                                     | 0.298080351                                      |
| 351.1608511                                      | 183.7838298                                     | 0.275182316                                      |
| 741.6180745                                      | 324.8932788                                     | 0.292230681                                      |
| 368.3071024                                      | 304.8359453                                     | 0.233823315                                      |
| 436.4560602                                      | 413.330563                                      | 0.221566502                                      |
| 533.4138733                                      | 533.4452625                                     | 0.216324287                                      |
| 180.9837398                                      | 142.5723577                                     | 0.213209147                                      |
| 1302.498487                                      | 474.3518569                                     | 0.278001871                                      |
| 335.6260601                                      | 266.2166538                                     | 0.23489976                                       |
| 834.0871477                                      | 222.0597362                                     | 0.35637921                                       |
| 605.2419929                                      | 268.5740487                                     | 0.278255862                                      |
| 413.3697749                                      | 196.8673633                                     | 0.305241437                                      |
| 196.5336463                                      | 112.4663537                                     | 0.260045489                                      |
| 450.0302368                                      | 212.6029144                                     | 0.302119315                                      |
| 672.086804                                       | 390.9780798                                     | 0.261332604                                      |
| 114.0470723                                      | 103.043628                                      | 0.201740937                                      |
| 154.8542891                                      | 63.39482961                                     | 0.317161273                                      |
| 170.0192308                                      | 133.25                                          | 0.219129339                                      |
| 455.984819                                       | 183.3363176                                     | 0.301054724                                      |
| 695.2153664                                      | 215.4028478                                     | 0.352044871                                      |
| 735.733156                                       | 382.8541667                                     | 0.275139081                                      |
| 180.4456522                                      | 93.42753623                                     | 0.2645926                                        |
| 233.606015                                       | 98.41654135                                     | 0.286088629                                      |
| 281.985641                                       | 179.4041026                                     | 0.247073854                                      |
| 712.3651422                                      | 287.4509271                                     | 0.301635367                                      |
| 477.4089069                                      | 325.2677848                                     | 0.232480263                                      |
| 264.5946602                                      | 146.9247573                                     | 0.274061806                                      |
| 1363.321832                                      | 665.7185891                                     | 0.27386973                                       |
| 211.0249151                                      | 192.6183465                                     | 0.246782934                                      |
| 403.8389513                                      | 231.6179775                                     | 0.271735264                                      |
| 929.1115909                                      | 454.879081                                      | 0.293150934                                      |
| 1130.914994                                      | 619.953168                                      | 0.248155043                                      |
| 121.8455696                                      | 74.01518987                                     | 0.222851639                                      |
| 477.6949767                                      | 395.5717245                                     | 0.224153263                                      |
| 150.357362                                       | 167.5874233                                     | 0.211098276                                      |
| 919.70976                                        | 522.4448                                        | 0.258265699                                      |
| 956.5847704                                      | 456.9778043                                     | 0.288690671                                      |
| 346.9006211                                      | 333.1925466                                     | 0.203108479                                      |
| 198.2902232                                      | 111.6528099                                     | 0.25413234                                       |
| 565.5202797                                      | 383.3897436                                     | 0.233632012                                      |
| 329.879333                                       | 191.461606                                      | 0.264362817                                      |
| 435.9048251                                      | 144.2678176                                     | 0.35592254                                       |
| 607.9805174                                      | 195.324497                                      | 0.319303655                                      |
| 193.3338301                                      | 134.7511177                                     | 0.240325868                                      |
| 316.484975                                       | 253.3614357                                     | 0.220071107                                      |
| 125.2985386                                      | 103.0125261                                     | 0.21371316                                       |
| 258.3872291                                      | 164.4516696                                     | 0.257039207                                      |
| 454.1534844                                      | 152.2749038                                     | 0.330119582                                      |
| 385.6405229                                      | 127.5852187                                     | 0.371868021                                      |
| 262.2984992                                      | 151.7359644                                     | 0.285893276                                      |
| 431.8179872                                      | 285.321811                                      | 0.246646922                                      |
| 452.6654735                                      | 296.1552229                                     | 0.201137755                                      |
| 413.3936039                                      | 168.8220582                                     | 0.300074529                                      |
| 147.0221932                                      | 227.154047                                      | 0.140221052                                      |
| 369.9157233                                      | 179.8947589                                     | 0.295288831                                      |
| 393.5594457                                      | 228.3202042                                     | 0.260201201                                      |
| 211.8114754                                      | 138.6857923                                     | 0.240160329                                      |
| 248.9980247                                      | 206.5111111                                     | 0.213038428                                      |
| 126.8650307                                      | 190.1411043                                     | 0.172078337                                      |
| 463.6994123                                      | 161.4634761                                     | 0.326332893                                      |
| 868.5917422                                      | 400.0191009                                     | 0.292266453                                      |
| 476.0175758                                      | 289.0806061                                     | 0.258614418                                      |
| 778.5358456                                      | 329.6856618                                     | 0.297743207                                      |
| 463.3512566                                      | 287.2787843                                     | 0.266693519                                      |
| 453.8817891                                      | 228.0670927                                     | 0.256277705                                      |
| 132.7574021                                      | 116.1862464                                     | 0.23952972                                       |
| 110.5779376                                      | 95.22541966                                     | 0.210862414                                      |
| 660.088327                                       | 625.4714236                                     | 0.220491442                                      |

| log.sigma.2.5.mm.3D_gldm_DependenceNonUniformityNormalized | log.sigma.2.5.mm.3D_gldm_DependenceVariance | log.sigma.2.5.mm.3D_gldm_LargeDependenceEmphasis |
|------------------------------------------------------------|---------------------------------------------|--------------------------------------------------|
| 0.195486715                                                | 4.249875413                                 | 12.80867107                                      |
| 0.120244788                                                | 7.191253968                                 | 26.1486631                                       |
| 0.122506115                                                | 8.275269468                                 | 27.14732725                                      |
| 0.166881258                                                | 3.731892902                                 | 14.30603889                                      |
| 0.153772927                                                | 5.713259422                                 | 18.39864865                                      |
| 0.186620753                                                | 2.805913682                                 | 11.87878788                                      |
| 0.145691551                                                | 7.434761744                                 | 21.87099628                                      |
| 0.134455817                                                | 6.967102443                                 | 22.58104933                                      |
| 0.15855858                                                 | 5.012446654                                 | 16.85173779                                      |
| 0.176492189                                                | 3.918213271                                 | 14.0130597                                       |
| 0.156935777                                                | 4.223177536                                 | 16.35278515                                      |
| 0.162335957                                                | 4.59467742                                  | 15.67592191                                      |
| 0.093934657                                                | 15.13889105                                 | 44.99250134                                      |
| 0.154797565                                                | 5.361178716                                 | 17.66627839                                      |
| 0.167364623                                                | 4.065264048                                 | 14.52318548                                      |
| 0.135527549                                                | 7.219593161                                 | 22.81992687                                      |
| 0.180925566                                                | 3.108137                                    | 12.69011725                                      |
| 0.112218795                                                | 7.973277449                                 | 29.0081103                                       |
| 0.14044601                                                 | 5.85052742                                  | 21.22804314                                      |
| 0.155415354                                                | 4.851504985                                 | 17.01615695                                      |
| 0.10277699                                                 | 13.10019666                                 | 39.90410053                                      |
| 0.1622439                                                  | 3.749759715                                 | 15.41334569                                      |
| 0.143608093                                                | 5.258239746                                 | 19.02929688                                      |
| 0.152324041                                                | 4.771126518                                 | 17.78503967                                      |
| 0.14818803                                                 | 5.804387333                                 | 19.17596229                                      |
| 0.189059972                                                | 3.043445119                                 | 11.74208527                                      |
| 0.159280996                                                | 5.24629141                                  | 16.93875657                                      |
| 0.143394291                                                | 5.264818754                                 | 18.75887038                                      |
| 0.173520712                                                | 3.064606699                                 | 13.31319911                                      |
| 0.138109884                                                | 5.13716604                                  | 20.35248296                                      |
| 0.132421385                                                | 7.477509969                                 | 23.48759983                                      |
| 0.120481148                                                | 7.744281916                                 | 26.17738038                                      |
| 0.163624673                                                | 4.873893019                                 | 16.05048002                                      |
| 0.149430149                                                | 6.935844273                                 | 20.54723404                                      |
| 0.168396475                                                | 4.6396631                                   | 15.50090827                                      |
| 0.122809971                                                | 8.976165113                                 | 27.32677559                                      |
| 0.117295367                                                | 8.768106755                                 | 28.24321419                                      |
| 0.103354752                                                | 18.99151323                                 | 46.97829878                                      |
| 0.147141252                                                | 4.147044748                                 | 18.23089431                                      |
| 0.179160727                                                | 3.486363549                                 | 13.53535076                                      |
| 0.129385528                                                | 6.676942639                                 | 22.99306091                                      |
| 0.215693599                                                | 2.308233774                                 | 9.365658133                                      |
| 0.165683546                                                | 4.271708698                                 | 15.37612921                                      |
| 0.166145408                                                | 4.227259334                                 | 14.82636656                                      |
| 0.153782196                                                | 4.57518472                                  | 16.9514867                                       |
| 0.163945441                                                | 5.20096297                                  | 16.44116576                                      |
| 0.147322842                                                | 5.334404775                                 | 18.58132398                                      |
| 0.130938085                                                | 5.443734256                                 | 22.29047072                                      |
| 0.181967437                                                | 3.301202291                                 | 12.47121034                                      |
| 0.125753869                                                | 7.447093502                                 | 25.10946746                                      |
| 0.177495064                                                | 3.560744094                                 | 13.28960685                                      |
| 0.206234164                                                | 2.722838041                                 | 10.28329872                                      |
| 0.163061426                                                | 3.862883375                                 | 14.96808511                                      |
| 0.163447149                                                | 4.17805805                                  | 15.78985507                                      |
| 0.17564362                                                 | 3.574528803                                 | 13.67067669                                      |
| 0.144608021                                                | 4.769699934                                 | 18.38769231                                      |
| 0.176110048                                                | 3.371874569                                 | 13.07021014                                      |
| 0.138059256                                                | 5.86307139                                  | 20.90167727                                      |
| 0.160555012                                                | 4.358740221                                 | 15.87257282                                      |
| 0.149339668                                                | 7.919919093                                 | 22.00974915                                      |
| 0.119493157                                                | 9.781730921                                 | 29.10985277                                      |
| 0.151250544                                                | 5.612290816                                 | 18.48614232                                      |
| 0.160496043                                                | 5.646561773                                 | 17.51684229                                      |
| 0.148355633                                                | 5.075227591                                 | 18.37767283                                      |
| 0.154234898                                                | 4.640179458                                 | 18.13417722                                      |
| 0.123691087                                                | 8.754670519                                 | 27.17659244                                      |
| 0.115304725                                                | 10.04166275                                 | 30.88957055                                      |
| 0.147153562                                                | 5.868404838                                 | 19.35904                                         |
| 0.163323335                                                | 4.289776175                                 | 15.35956975                                      |
| 0.119703458                                                | 7.073476341                                 | 25.95307108                                      |
| 0.152648363                                                | 4.613941796                                 | 17.31254811                                      |
| 0.131822909                                                | 6.32334257                                  | 22.20792541                                      |
| 0.144747404                                                | 6.060666855                                 | 19.78543221                                      |
| 0.192963623                                                | 3.771588968                                 | 12.27401505                                      |
| 0.194180938                                                | 3.202165302                                 | 11.83423826                                      |
| 0.144063957                                                | 5.650962485                                 | 19.82265276                                      |
| 0.132088888                                                | 6.318190306                                 | 22.70784641                                      |
| 0.130791794                                                | 6.742073126                                 | 23.69102296                                      |
| 0.151369203                                                | 5.182489552                                 | 18.12478032                                      |
| 0.194165662                                                | 2.651420117                                 | 10.84437794                                      |
| 0.193886638                                                | 4.371661534                                 | 13.02513826                                      |
| 0.14580239                                                 | 6.828270044                                 | 20.43079489                                      |
| 0.132094826                                                | 9.237154725                                 | 26.07249924                                      |
| 0.147304092                                                | 4.213196427                                 | 18.73641393                                      |
| 0.169493073                                                | 4.245706262                                 | 14.75563756                                      |
| 0.095967489                                                | 11.01969473                                 | 40.65535248                                      |
| 0.155100932                                                | 6.725088406                                 | 19.49559748                                      |
| 0.143530068                                                | 7.184410747                                 | 21.64770241                                      |
| 0.14467997                                                 | 5.421099092                                 | 19.46311475                                      |
| 0.122961988                                                | 6.764699528                                 | 24.68790123                                      |
| 0.097289134                                                | 11.29663329                                 | 38.61809816                                      |
| 0.194668099                                                | 2.90123449                                  | 11.24853065                                      |
| 0.167584747                                                | 4.250755216                                 | 14.97723326                                      |
| 0.14424775                                                 | 5.851502663                                 | 19.64484848                                      |
| 0.178891509                                                | 3.22868458                                  | 12.78860294                                      |
| 0.13540364                                                 | 8.871223469                                 | 24.75920514                                      |
| 0.161122396                                                | 4.07047228                                  | 15.8029819                                       |
| 0.126797901                                                | 6.802221109                                 | 23.7086915                                       |
| 0.132587455                                                | 6.413775454                                 | 23.03357314                                      |
| 0.114320805                                                | 10.31296068                                 | 31.01593349                                      |

| log.sigma.2.5.mm.3D_gldm_LargeDependenceLowGrayLevelEmphasis | log.sigma.2.5.mm.3D_gldm_SmallDependenceHighGrayLevelEmphasis | log.sigma.2.5.mm.3D_gldm_LargeDependenceHighGrayLevelEmphasis |
|--------------------------------------------------------------|---------------------------------------------------------------|---------------------------------------------------------------|
| 0.031447642                                                  | 185.0288921                                                   | 7257.150801                                                   |
| 0.157556967                                                  | 41.21483089                                                   | 4761.392513                                                   |
| 0.275234209                                                  | 34.14378554                                                   | 3477.182529                                                   |
| 0.046196405                                                  | 95.96319141                                                   | 5627.595701                                                   |
| 0.062412423                                                  | 83.71328854                                                   | 6332.4375                                                     |
| 0.051481778                                                  | 95.07241127                                                   | 3311.569697                                                   |
| 0.057674567                                                  | 112.9466792                                                   | 8788.302601                                                   |
| 0.057016504                                                  | 108.6900509                                                   | 9466.986296                                                   |
| 0.03429132                                                   | 141.8138795                                                   | 8945.971843                                                   |
| 0.054389163                                                  | 96.63916028                                                   | 4800.550373                                                   |
| 0.108096374                                                  | 44.72230479                                                   | 2994.94695                                                    |
| 0.034742303                                                  | 147.8571821                                                   | 7746.515835                                                   |
| 0.178192886                                                  | 49.47142757                                                   | 12118.77772                                                   |
| 0.027590875                                                  | 193.0519912                                                   | 12444.18171                                                   |
| 0.038469922                                                  | 125.3828155                                                   | 6314.729839                                                   |
| 0.079509376                                                  | 86.74338737                                                   | 7306.482633                                                   |
| 0.073030395                                                  | 68.51719389                                                   | 3134.590452                                                   |
| 0.18444157                                                   | 36.48128123                                                   | 4982.8897                                                     |
| 0.135996781                                                  | 39.03070983                                                   | 3659.205701                                                   |
| 0.048154394                                                  | 110.3685865                                                   | 6616.97538                                                    |
| 0.192158507                                                  | 40.53500762                                                   | 8756.579034                                                   |
| 0.091016764                                                  | 44.36663376                                                   | 2997.897127                                                   |
| 0.079200589                                                  | 66.85987291                                                   | 5085.402344                                                   |
| 0.101353971                                                  | 53.79820934                                                   | 3707.962221                                                   |
| 0.049082605                                                  | 128.8956782                                                   | 9062.516889                                                   |
| 0.0314213                                                    | 154.5352951                                                   | 5392.996201                                                   |
| 0.045343453                                                  | 130.2260144                                                   | 7195.978348                                                   |
| 0.049577646                                                  | 107.1985074                                                   | 7691.685373                                                   |
| 0.088249508                                                  | 53.33652729                                                   | 2379.302013                                                   |
| 0.069120149                                                  | 62.32274213                                                   | 6412.699611                                                   |
| 0.04909109                                                   | 128.8079734                                                   | 11816.12484                                                   |
| 0.089793456                                                  | 61.78178492                                                   | 8253.17158                                                    |
| 0.046596278                                                  | 120.201349                                                    | 6591.641375                                                   |
| 0.05100068                                                   | 123.6589708                                                   | 9256.580851                                                   |
| 0.053624432                                                  | 101.4302325                                                   | 5129.201181                                                   |
| 0.125355107                                                  | 68.44985512                                                   | 6963.31077                                                    |
| 0.047991122                                                  | 130.4309335                                                   | 17161.82102                                                   |
| 0.120184798                                                  | 103.2003831                                                   | 19202.49564                                                   |
| 0.096318789                                                  | 43.044448                                                     | 4349.85122                                                    |
| 0.065521881                                                  | 75.71440784                                                   | 3528.487758                                                   |
| 0.098037953                                                  | 61.82998029                                                   | 6610.281033                                                   |
| 0.051217637                                                  | 98.69203067                                                   | 2505.94647                                                    |
| 0.049143988                                                  | 98.09226987                                                   | 5564.196003                                                   |
| 0.026144655                                                  | 167.3956719                                                   | 9136.108521                                                   |
| 0.070761914                                                  | 74.15468239                                                   | 4561.205008                                                   |
| 0.046289557                                                  | 126.0625943                                                   | 6446.728597                                                   |
| 0.054101107                                                  | 103.5423794                                                   | 7078.058965                                                   |
| 0.153145522                                                  | 32.09019819                                                   | 3607.657865                                                   |
| 0.061621492                                                  | 82.61817797                                                   | 3309.831962                                                   |
| 0.187870613                                                  | 40.35867847                                                   | 3880.031805                                                   |
| 0.0296881                                                    | 149.7895735                                                   | 6803.566757                                                   |
| 0.040128075                                                  | 111.0298393                                                   | 3437.469594                                                   |
| 0.093127057                                                  | 56.30757392                                                   | 3205.528369                                                   |
| 0.110771169                                                  | 54.83636451                                                   | 2640.778986                                                   |
| 0.048606985                                                  | 96.98318727                                                   | 4365.006767                                                   |
| 0.038324485                                                  | 119.466028                                                    | 9420.907692                                                   |
| 0.040760732                                                  | 105.414515                                                    | 4824.786403                                                   |
| 0.053525193                                                  | 98.09369451                                                   | 9253.251012                                                   |
| 0.059197015                                                  | 74.4005541                                                    | 4810.985437                                                   |
| 0.052604516                                                  | 132.5334773                                                   | 10035.82988                                                   |
| 0.105498385                                                  | 77.73363475                                                   | 8436.231031                                                   |
| 0.055107446                                                  | 104.093963                                                    | 7162.4603                                                     |
| 0.050872052                                                  | 118.4016456                                                   | 6813.59924                                                    |
| 0.036702237                                                  | 136.5320562                                                   | 9846.22865                                                    |
| 0.199022439                                                  | 27.38982877                                                   | 2133.558228                                                   |
| 0.060514977                                                  | 110.7451366                                                   | 12836.2522                                                    |
| 0.075870152                                                  | 80.59616885                                                   | 13121.24463                                                   |
| 0.047132352                                                  | 112.7632487                                                   | 8694.73328                                                    |
| 0.038083798                                                  | 114.1721217                                                   | 6917.154004                                                   |
| 0.093694597                                                  | 59.37272801                                                   | 7538.0245                                                     |
| 0.071272852                                                  | 72.62154498                                                   | 5204.830639                                                   |
| 0.062817254                                                  | 94.53756774                                                   | 8532.148951                                                   |
| 0.038387401                                                  | 147.030835                                                    | 10911.32953                                                   |
| 0.044355031                                                  | 118.8654652                                                   | 4668.64409                                                    |
| 0.060620043                                                  | 88.33850274                                                   | 3077.59917                                                    |
| 0.050041301                                                  | 87.77136206                                                   | 8528.084948                                                   |
| 0.101932125                                                  | 56.76920511                                                   | 5402.035893                                                   |
| 0.138185735                                                  | 46.1603515                                                    | 4741.442589                                                   |
| 0.073281857                                                  | 67.39747654                                                   | 4948.146456                                                   |
| 0.022095893                                                  | 180.6081675                                                   | 6438.03805                                                    |
| 0.028802518                                                  | 190.9021812                                                   | 7327.483157                                                   |
| 0.096898661                                                  | 67.66736262                                                   | 5155.367426                                                   |
| 0.078926775                                                  | 96.10895284                                                   | 9247.792903                                                   |
| 0.103327918                                                  | 40.03034826                                                   | 4012.667751                                                   |
| 0.049663543                                                  | 97.99359972                                                   | 5288.208282                                                   |
| 0.170764534                                                  | 33.93723117                                                   | 10056.90535                                                   |
| 0.055838159                                                  | 107.184072                                                    | 7888.807128                                                   |
| 0.074549638                                                  | 88.44598054                                                   | 6830.240336                                                   |
| 0.069746413                                                  | 74.9634175                                                    | 6185.760246                                                   |
| 0.057680798                                                  | 93.20458516                                                   | 11338.40741                                                   |
| 0.255300969                                                  | 35.25685489                                                   | 6156.141104                                                   |
| 0.045967782                                                  | 100.333046                                                    | 3456.805206                                                   |
| 0.042166494                                                  | 115.0171329                                                   | 6113.979549                                                   |
| 0.070447927                                                  | 79.86015068                                                   | 6229.929697                                                   |
| 0.03934186                                                   | 102.029471                                                    | 4779.627757                                                   |
| 0.052782625                                                  | 148.5996397                                                   | 13143.15868                                                   |
| 0.069733314                                                  | 65.81575313                                                   | 4222.876464                                                   |
| 0.054032557                                                  | 94.01969208                                                   | 11186.42407                                                   |
| 0.109723639                                                  | 40.71808738                                                   | 5331.645084                                                   |
| 0.130671571                                                  | 64.49323542                                                   | 7939.42778                                                    |

| log.sigma.2.5.mm.3D_gldm_SmallDependenceLowGrayLevelEmphasis | log.sigma.2.5.mm.3D_gldm_LowGrayLevelEmphasis | log.sigma.2.5.mm.3D_gldm_DistanceZoneVariabilityNormalized |
|--------------------------------------------------------------|-----------------------------------------------|------------------------------------------------------------|
| 0.002894359                                                  | 0.005074906                                   | 0.991179886                                                |
| 0.00403147                                                   | 0.008994631                                   | 1                                                          |
| 0.005514498                                                  | 0.016403406                                   | 1                                                          |
| 0.00329257                                                   | 0.005934742                                   | 1                                                          |
| 0.002348974                                                  | 0.005541635                                   | 1                                                          |
| 0.003479961                                                  | 0.006538739                                   | 1                                                          |
| 0.001051696                                                  | 0.002983999                                   | 0.99529691                                                 |
| 0.001111633                                                  | 0.003007198                                   | 1                                                          |
| 0.001021026                                                  | 0.002510192                                   | 0.998652292                                                |
| 0.002245243                                                  | 0.006180325                                   | 1                                                          |
| 0.00368924                                                   | 0.009453679                                   | 1                                                          |
| 0.001412452                                                  | 0.003027987                                   | 0.997452233                                                |
| 0.002536883                                                  | 0.006147621                                   | 1                                                          |
| 0.001962068                                                  | 0.003050419                                   | 1                                                          |
| 0.002200451                                                  | 0.004171436                                   | 1                                                          |
| 0.002118542                                                  | 0.004982947                                   | 1                                                          |
| 0.003247985                                                  | 0.008057427                                   | 1                                                          |
| 0.003809899                                                  | 0.008996226                                   | 1                                                          |
| 0.002788102                                                  | 0.007915961                                   | 1                                                          |
| 0.001344597                                                  | 0.003462224                                   | 1                                                          |
| 0.001502398                                                  | 0.005549437                                   | 1                                                          |
| 0.003511455                                                  | 0.008039893                                   | 0.99378888                                                 |
| 0.002810233                                                  | 0.006025161                                   | 1                                                          |
| 0.002257667                                                  | 0.007277149                                   | 1                                                          |
| 0.001647064                                                  | 0.004438957                                   | 1                                                          |
| 0.001643073                                                  | 0.003629546                                   | 1                                                          |
| 0.001471853                                                  | 0.003425155                                   | 1                                                          |
| 0.001471427                                                  | 0.003532117                                   | 1                                                          |
| 0.004249897                                                  | 0.008841029                                   | 1                                                          |
| 0.001718372                                                  | 0.004470986                                   | 1                                                          |
| 0.000960392                                                  | 0.002532454                                   | 1                                                          |
| 0.002191484                                                  | 0.005288687                                   | 1                                                          |
| 0.001744829                                                  | 0.003972814                                   | 0.994642896                                                |
| 0.001636739                                                  | 0.003580326                                   | 1                                                          |
| 0.001896244                                                  | 0.004477429                                   | 0.992110577                                                |
| 0.00218493                                                   | 0.006342234                                   | 1                                                          |
| 0.000837074                                                  | 0.002182387                                   | 1                                                          |
| 0.001359935                                                  | 0.003460647                                   | 1                                                          |
| 0.003060368                                                  | 0.008777285                                   | 1                                                          |
| 0.002076965                                                  | 0.005763029                                   | 0.998349836                                                |
| 0.002894443                                                  | 0.0073651                                     | 1                                                          |
| 0.003083976                                                  | 0.006814318                                   | 0.99880024                                                 |
| 0.001796813                                                  | 0.004246996                                   | 1                                                          |
| 0.00117682                                                   | 0.002479226                                   | 1                                                          |
| 0.002861824                                                  | 0.005922721                                   | 1                                                          |
| 0.001477863                                                  | 0.003475455                                   | 1                                                          |
| 0.001266069                                                  | 0.00372187                                    | 1                                                          |
| 0.004853297                                                  | 0.01069081                                    | 1                                                          |
| 0.005729492                                                  | 0.00957607                                    | 1                                                          |
| 0.004701944                                                  | 0.01029543                                    | 0.994047672                                                |
| 0.001504727                                                  | 0.003126953                                   | 1                                                          |
| 0.002666637                                                  | 0.00557567                                    | 0.998596492                                                |
| 0.004314828                                                  | 0.009769688                                   | 1                                                          |
| 0.003891464                                                  | 0.008933158                                   | 1                                                          |
| 0.001980123                                                  | 0.004450659                                   | 1                                                          |
| 0.00127064                                                   | 0.002866694                                   | 1                                                          |
| 0.001890664                                                  | 0.004159875                                   | 0.995783575                                                |
| 0.001102352                                                  | 0.003584521                                   | 1                                                          |
| 0.003882864                                                  | 0.006692238                                   | 1                                                          |
| 0.000978003                                                  | 0.002781503                                   | 0.995853508                                                |
| 0.001913123                                                  | 0.004651839                                   | 1                                                          |
| 0.002123632                                                  | 0.004749924                                   | 1                                                          |
| 0.001270686                                                  | 0.003588752                                   | 0.986889124                                                |
| 0.000733544                                                  | 0.002276314                                   | 0.989936214                                                |
| 0.005761528                                                  | 0.015522428                                   | 1                                                          |
| 0.001224587                                                  | 0.003016251                                   | 0.985773088                                                |
| 0.001820361                                                  | 0.003860303                                   | 1                                                          |
| 0.001119405                                                  | 0.003126182                                   | 0.995675696                                                |
| 0.001357208                                                  | 0.0032992                                     | 1                                                          |
| 0.001529436                                                  | 0.004373696                                   | 1                                                          |
| 0.002183161                                                  | 0.006349093                                   | 1                                                          |
| 0.002057952                                                  | 0.004136632                                   | 0.994594634                                                |
| 0.001195133                                                  | 0.002661081                                   | 1                                                          |
| 0.004190749                                                  | 0.007203736                                   | 1                                                          |
| 0.002552183                                                  | 0.006463224                                   | 0.998329157                                                |
| 0.002249234                                                  | 0.004315195                                   | 1                                                          |
| 0.001711204                                                  | 0.005242541                                   | 1                                                          |
| 0.004289109                                                  | 0.010372683                                   | 1                                                          |
| 0.002337557                                                  | 0.005547783                                   | 0.996031762                                                |
| 0.001406397                                                  | 0.002861615                                   | 1                                                          |
| 0.002633738                                                  | 0.004161619                                   | 1                                                          |
| 0.003558261                                                  | 0.00789418                                    | 1                                                          |
| 0.001777003                                                  | 0.003996156                                   | 1                                                          |
| 0.001935929                                                  | 0.006976086                                   | 1                                                          |
| 0.002104337                                                  | 0.004868425                                   | 0.995288601                                                |
| 0.001453085                                                  | 0.005056345                                   | 1                                                          |
| 0.002322659                                                  | 0.004679923                                   | 1                                                          |
| 0.001679578                                                  | 0.004203073                                   | 1                                                          |
| 0.002161442                                                  | 0.005223922                                   | 1                                                          |
| 0.001215593                                                  | 0.003198547                                   | 1                                                          |
| 0.001930158                                                  | 0.007201982                                   | 1                                                          |
| 0.002282723                                                  | 0.005137473                                   | 0.995671016                                                |
| 0.001514917                                                  | 0.00374707                                    | 0.994372583                                                |
| 0.002467036                                                  | 0.00544768                                    | 1                                                          |
| 0.001610508                                                  | 0.003913756                                   | 0.998687665                                                |
| 0.001350516                                                  | 0.00332229                                    | 0.99611652                                                 |
| 0.002097124                                                  | 0.005744774                                   | 1                                                          |
| 0.001889619                                                  | 0.003740678                                   | 1                                                          |
| 0.003105775                                                  | 0.007415872                                   | 1                                                          |
| 0.001408411                                                  | 0.004938107                                   | 0.998592541                                                |

| log.sigma.2.5.mm.3D_gldzm_LowIntensityEmphasis | log.sigma.2.5.mm.3D_gldzm_LargeDistanceEmphasis | log.sigma.2.5.mm.3D_gldzm_HighIntensitySmallDistanceEmphasis |
|------------------------------------------------|-------------------------------------------------|--------------------------------------------------------------|
| 0.007832842                                    | 1.013289037                                     | 503.942691                                                   |
| 0.019241461                                    | 1                                               | 203.8846154                                                  |
| 0.0286468                                      | 1                                               | 165.2884097                                                  |
| 0.010515099                                    | 1                                               | 331.8925373                                                  |
| 0.008853761                                    | 1                                               | 311.9744624                                                  |
| 0.010821998                                    | 1                                               | 327.1403509                                                  |
| 0.003944753                                    | 1.007071302                                     | 443.8535651                                                  |
| 0.00439448                                     | 1                                               | 448.8411681                                                  |
| 0.003478104                                    | 1.002022927                                     | 511.5084289                                                  |
| 0.008446135                                    | 1                                               | 332.5333333                                                  |
| 0.014542424                                    | 1                                               | 174.6099773                                                  |
| 0.004573086                                    | 1.003826531                                     | 497.6772959                                                  |
| 0.013985936                                    | 1                                               | 288.3252033                                                  |
| 0.006348302                                    | 1                                               | 689.9418182                                                  |
| 0.006854995                                    | 1                                               | 417.4719424                                                  |
| 0.008271314                                    | 1                                               | 356.5329536                                                  |
| 0.011275771                                    | 1                                               | 237.0746988                                                  |
| 0.018529757                                    | 1                                               | 192.6455224                                                  |
| 0.012397227                                    | 1                                               | 178.6238245                                                  |
| 0.004809082                                    | 1                                               | 413.3248762                                                  |
| 0.008874141                                    | 1                                               | 244.2206406                                                  |
| 0.013011928                                    | 1.009345794                                     | 179.9602804                                                  |
| 0.010700792                                    | 1                                               | 273.1909722                                                  |
| 0.009834692                                    | 1                                               | 223.6888889                                                  |
| 0.007063252                                    | 1                                               | 506.6266319                                                  |
| 0.004961146                                    | 1                                               | 486.0324748                                                  |
| 0.004784805                                    | 1                                               | 446.5004525                                                  |
| 0.005380862                                    | 1                                               | 411.5095694                                                  |
| 0.013974176                                    | 1                                               | 202.7191781                                                  |
| 0.007752261                                    | 1                                               | 288.7791411                                                  |
| 0.003729971                                    | 1                                               | 522.0648567                                                  |
| 0.009745851                                    | 1                                               | 280.8387716                                                  |
| 0.005709417                                    | 1.008057296                                     | 403.7594002                                                  |
| 0.005706362                                    | 1                                               | 454.096817                                                   |
| 0.006270518                                    | 1.011881188                                     | 349.4929043                                                  |
| 0.009876024                                    | 1                                               | 299.9047014                                                  |
| 0.00367493                                     | 1                                               | 594.7569677                                                  |
| 0.006034378                                    | 1                                               | 482.8047244                                                  |
| 0.015025641                                    | 1                                               | 199.0068493                                                  |
| 0.007244645                                    | 1.002477291                                     | 275.8693229                                                  |
| 0.013078547                                    | 1                                               | 261.7610619                                                  |
| 0.008323749                                    | 1.00180072                                      | 278.0858343                                                  |
| 0.006199933                                    | 1                                               | 357.6624791                                                  |
| 0.003692453                                    | 1                                               | 552.1851429                                                  |
| 0.010234466                                    | 1                                               | 293.167979                                                   |
| 0.004723939                                    | 1                                               | 422.7167019                                                  |
| 0.005080064                                    | 1                                               | 402.7785924                                                  |
| 0.022728409                                    | 1                                               | 165.3826531                                                  |
| 0.016637738                                    | 1                                               | 257.9535604                                                  |
| 0.020101396                                    | 1.008955224                                     | 189.8395522                                                  |
| 0.004769166                                    | 1                                               | 505.8090395                                                  |
| 0.007424648                                    | 1.002106742                                     | 315.0407303                                                  |
| 0.015766369                                    | 1                                               | 207.3764124                                                  |
| 0.01392281                                     | 1                                               | 210.5015015                                                  |
| 0.006434408                                    | 1                                               | 346.2377778                                                  |
| 0.004824981                                    | 1                                               | 486.4172662                                                  |
| 0.005992398                                    | 1.006338028                                     | 353.9163732                                                  |
| 0.005257329                                    | 1                                               | 424.2945652                                                  |
| 0.013029168                                    | 1                                               | 277.302682                                                   |
| 0.003569363                                    | 1.006232687                                     | 483.8148373                                                  |
| 0.007372385                                    | 1                                               | 319.743487                                                   |
| 0.00794976                                     | 1                                               | 388.433414                                                   |
| 0.004520359                                    | 1.019796954                                     | 410.1003807                                                  |
| 0.002895349                                    | 1.015172414                                     | 554.458046                                                   |
| 0.025048932                                    | 1                                               | 126.4444444                                                  |
| 0.005221347                                    | 1.021494371                                     | 500.2436029                                                  |
| 0.008452167                                    | 1                                               | 383.5641892                                                  |
| 0.004350851                                    | 1.006500542                                     | 437.1382719                                                  |
| 0.004656625                                    | 1                                               | 397.6254527                                                  |
| 0.00729973                                     | 1                                               | 297.6273292                                                  |
| 0.009489267                                    | 1                                               | 288.1145833                                                  |
| 0.008291358                                    | 1.008130081                                     | 415.7215447                                                  |
| 0.004274771                                    | 1                                               | 557.4404591                                                  |
| 0.011420712                                    | 1                                               | 337.018143                                                   |
| 0.00798472                                     | 1.002508361                                     | 277.951714                                                   |
| 0.008630253                                    | 1                                               | 368.0454545                                                  |
| 0.00761854                                     | 1                                               | 262.4382609                                                  |
| 0.021529683                                    | 1                                               | 219.1497797                                                  |
| 0.008781373                                    | 1.005964215                                     | 265.2470179                                                  |
| 0.00399799                                     | 1                                               | 548.547046                                                   |
| 0.006667907                                    | 1                                               | 515.2698225                                                  |
| 0.012433111                                    | 1                                               | 235.6908784                                                  |
| 0.00678434                                     | 1                                               | 394.7785016                                                  |
| 0.009921226                                    | 1                                               | 198.2320675                                                  |
| 0.006962347                                    | 1.007083825                                     | 327.5067887                                                  |
| 0.010001544                                    | 1                                               | 242.2669492                                                  |
| 0.007380773                                    | 1                                               | 367.2935561                                                  |
| 0.006231654                                    | 1                                               | 347.841133                                                   |
| 0.008825915                                    | 1                                               | 315.9875622                                                  |
| 0.005667273                                    | 1                                               | 439.14375                                                    |
| 0.010744006                                    | 1                                               | 212.8498024                                                  |
| 0.006692545                                    | 1.006507592                                     | 312.1415401                                                  |
| 0.005129646                                    | 1.008465011                                     | 394.287105                                                   |
| 0.009309313                                    | 1                                               | 310.8606811                                                  |
| 0.005230838                                    | 1.001969796                                     | 345.4793171                                                  |
| 0.005340146                                    | 1.005836576                                     | 561.6678016                                                  |
| 0.008061695                                    | 1                                               | 258.5221445                                                  |
| 0.007617837                                    | 1                                               | 390.0875912                                                  |
| 0.014163617                                    | 1                                               | 189.7772277                                                  |
| 0.006497722                                    | 1.002112676                                     | 300.1558099                                                  |

| log.sigma.2.5.mm.3D_gldzm_LowIntensityLargeDistanceEmphasis | log.sigma.2.5.mm.3D_gldzm_HighIntensityEmphasis | log.sigma.2.5.mm.3D_gldzm_DistanceZoneVariability | log.sigma.2.5.mm.3D_gldzm_ZonePercentage |
|-------------------------------------------------------------|-------------------------------------------------|---------------------------------------------------|------------------------------------------|
| 0.007869926                                                 | 506.0099668                                     | 895.0354374                                       | 0.42541942                               |
| 0.019241461                                                 | 203.8846154                                     | 208                                               | 0.222459893                              |
| 0.0286468                                                   | 165.2884097                                     | 371                                               | 0.241851369                              |
| 0.010515099                                                 | 331.8925373                                     | 335                                               | 0.342886387                              |
| 0.008853761                                                 | 311.9744624                                     | 744                                               | 0.314189189                              |
| 0.010821998                                                 | 327.1403509                                     | 228                                               | 0.345454545                              |
| 0.003975508                                                 | 444.3653506                                     | 1689.018857                                       | 0.300300832                              |
| 0.00439448                                                  | 448.8411681                                     | 1404                                              | 0.27486296                               |
| 0.003481096                                                 | 511.8503034                                     | 1481.001349                                       | 0.326220853                              |
| 0.008446135                                                 | 332.5333333                                     | 375                                               | 0.349813433                              |
| 0.014542424                                                 | 174.6099773                                     | 441                                               | 0.292440318                              |
| 0.004611352                                                 | 497.7729592                                     | 782.002551                                        | 0.340130152                              |
| 0.013985936                                                 | 288.3252033                                     | 369                                               | 0.197643278                              |
| 0.006348302                                                 | 689.9418182                                     | 550                                               | 0.32032615                               |
| 0.006854995                                                 | 417.4719424                                     | 695                                               | 0.350302419                              |
| 0.008271314                                                 | 356.5329536                                     | 1229                                              | 0.280850091                              |
| 0.011275771                                                 | 237.0746988                                     | 415                                               | 0.347571189                              |
| 0.018529757                                                 | 192.6455224                                     | 268                                               | 0.217356042                              |
| 0.012397227                                                 | 178.6238245                                     | 319                                               | 0.245762712                              |
| 0.004809082                                                 | 413.3248762                                     | 1616                                              | 0.310829006                              |
| 0.008874141                                                 | 244.2206406                                     | 562                                               | 0.185846561                              |
| 0.013067228                                                 | 180.3551402                                     | 319.0062305                                       | 0.297497683                              |
| 0.010700792                                                 | 273.1909722                                     | 288                                               | 0.28125                                  |
| 0.009834692                                                 | 223.6888889                                     | 765                                               | 0.289006422                              |
| 0.007063252                                                 | 506.6266319                                     | 383                                               | 0.300864101                              |
| 0.004961146                                                 | 486.0324748                                     | 893                                               | 0.376952301                              |
| 0.004784805                                                 | 446.5004525                                     | 1105                                              | 0.341787813                              |
| 0.005380862                                                 | 411.5095694                                     | 836                                               | 0.302679218                              |
| 0.013974176                                                 | 202.7191781                                     | 146                                               | 0.326621924                              |
| 0.007752261                                                 | 288.7791411                                     | 489                                               | 0.238072055                              |
| 0.003729971                                                 | 522.0648567                                     | 1326                                              | 0.278688525                              |
| 0.009745851                                                 | 280.8387716                                     | 521                                               | 0.25181247                               |
| 0.006040242                                                 | 404.1575649                                     | 1111.016115                                       | 0.345927532                              |
| 0.005706362                                                 | 454.096817                                      | 754                                               | 0.320851064                              |
| 0.006312872                                                 | 350.5062706                                     | 1503.047525                                       | 0.34400545                               |
| 0.009876024                                                 | 299.9047014                                     | 787                                               | 0.262420807                              |
| 0.00367493                                                  | 594.7569677                                     | 897                                               | 0.24106423                               |
| 0.006034378                                                 | 482.8047244                                     | 1270                                              | 0.246076342                              |
| 0.015025641                                                 | 199.0068493                                     | 292                                               | 0.237398374                              |
| 0.007270173                                                 | 275.9318745                                     | 2418.003303                                       | 0.333149931                              |
| 0.013078547                                                 | 261.7610619                                     | 678                                               | 0.261372398                              |
| 0.008332936                                                 | 278.1740696                                     | 1664.0012                                         | 0.430824929                              |
| 0.006199933                                                 | 357.6624791                                     | 1194                                              | 0.32685464                               |
| 0.003692453                                                 | 552.1851429                                     | 875                                               | 0.351688103                              |
| 0.010234466                                                 | 293.167979                                      | 381                                               | 0.298122066                              |
| 0.004723939                                                 | 422.7167019                                     | 946                                               | 0.344626594                              |
| 0.005080064                                                 | 402.7785924                                     | 1364                                              | 0.29899167                               |
| 0.022728409                                                 | 165.3826531                                     | 196                                               | 0.25208703                               |
| 0.016637738                                                 | 257.9535604                                     | 323                                               | 0.379553467                              |
| 0.020211954                                                 | 190.0208955                                     | 333.0059701                                       | 0.247781065                              |
| 0.004769166                                                 | 505.8090395                                     | 885                                               | 0.34449202                               |
| 0.007429001                                                 | 315.2956461                                     | 1422.001404                                       | 0.42242658                               |
| 0.015766369                                                 | 207.3764124                                     | 1416                                              | 0.313829787                              |
| 0.01392281                                                  | 210.5015015                                     | 333                                               | 0.301630435                              |
| 0.006434408                                                 | 346.2377778                                     | 450                                               | 0.338345865                              |
| 0.004824981                                                 | 486.4172662                                     | 556                                               | 0.285128205                              |
| 0.006044041                                                 | 354.1408451                                     | 1414.012676                                       | 0.35105068                               |
| 0.005257329                                                 | 424.2945652                                     | 920                                               | 0.26604974                               |
| 0.013029168                                                 | 277.302682                                      | 522                                               | 0.316747573                              |
| 0.003589635                                                 | 484.4664127                                     | 2876.024931                                       | 0.316354475                              |
| 0.007372385                                                 | 319.743487                                      | 499                                               | 0.282559456                              |
| 0.00794976                                                  | 388.433414                                      | 826                                               | 0.309363296                              |
| 0.004776096                                                 | 411.5162437                                     | 1944.171574                                       | 0.34030057                               |
| 0.002946675                                                 | 555.8735632                                     | 2153.111264                                       | 0.28532074                               |
| 0.025048932                                                 | 126.4444444                                     | 216                                               | 0.273417722                              |
| 0.005319143                                                 | 501.9416581                                     | 963.1003071                                       | 0.252977732                              |
| 0.008452167                                                 | 383.5641892                                     | 296                                               | 0.226993865                              |
| 0.004372854                                                 | 437.6229686                                     | 1838.017335                                       | 0.29536                                  |
| 0.004656625                                                 | 397.6254527                                     | 1933                                              | 0.33003244                               |
| 0.00729973                                                  | 297.6273292                                     | 644                                               | 0.222222222                              |
| 0.009489267                                                 | 288.1145833                                     | 384                                               | 0.295612009                              |
| 0.00835659                                                  | 416.0542005                                     | 1101.01626                                        | 0.258041958                              |
| 0.004274771                                                 | 557.4404591                                     | 697                                               | 0.305835893                              |
| 0.011420712                                                 | 337.018143                                      | 937                                               | 0.414785303                              |
| 0.00800545                                                  | 278.027592                                      | 1194.001672                                       | 0.381986586                              |
| 0.008630253                                                 | 368.0454545                                     | 374                                               | 0.278688525                              |
| 0.00761854                                                  | 262.4382609                                     | 575                                               | 0.239983306                              |
| 0.021529683                                                 | 219.1497797                                     | 227                                               | 0.236951983                              |
| 0.008816664                                                 | 265.499006                                      | 501.0039761                                       | 0.29466901                               |
| 0.00399799                                                  | 548.547046                                      | 914                                               | 0.390765284                              |
| 0.006667907                                                 | 515.2698225                                     | 845                                               | 0.424836601                              |
| 0.012433111                                                 | 235.6908784                                     | 592                                               | 0.329071707                              |
| 0.00678434                                                  | 394.7785016                                     | 921                                               | 0.281737534                              |
| 0.009921226                                                 | 198.2320675                                     | 711                                               | 0.231369997                              |
| 0.00698131                                                  | 328.1841795                                     | 843.0094451                                       | 0.347273473                              |
| 0.010001544                                                 | 242.2669492                                     | 236                                               | 0.154046997                              |
| 0.007380773                                                 | 367.2935561                                     | 838                                               | 0.351362683                              |
| 0.006231654                                                 | 347.841133                                      | 812                                               | 0.296134209                              |
| 0.008825915                                                 | 315.9875622                                     | 402                                               | 0.274590164                              |
| 0.005667273                                                 | 439.14375                                       | 480                                               | 0.237037037                              |
| 0.010744006                                                 | 212.8498024                                     | 253                                               | 0.194018405                              |
| 0.006731051                                                 | 312.4164859                                     | 918.0086768                                       | 0.387069689                              |
| 0.005172272                                                 | 394.7471783                                     | 1762.028217                                       | 0.341886938                              |
| 0.009309313                                                 | 310.8606811                                     | 969                                               | 0.293636364                              |
| 0.005261616                                                 | 345.5108339                                     | 1521.001313                                       | 0.349954044                              |
| 0.005358328                                                 | 562.1420233                                     | 1024.007782                                       | 0.300409117                              |
| 0.008061695                                                 | 258.5221445                                     | 858                                               | 0.30457934                               |
| 0.007617837                                                 | 390.0875912                                     | 274                                               | 0.261700096                              |
| 0.014163617                                                 | 189.7772277                                     | 202                                               | 0.242206235                              |
| 0.006515182                                                 | 300.2197183                                     | 1418.001408                                       | 0.245930031                              |



| log.sigma.2.5.mm.3D_gldzm_IntensityVariabilityNormalized | log.sigma.2.5.mm.3D_gldzm_LowIntensitySmallDistanceEmphasis | log.sigma.2.5.mm.3D_gldzm_IntensityVariability |
|----------------------------------------------------------|-------------------------------------------------------------|------------------------------------------------|
| 0.042917113                                              | 0.007823572                                                 | 38.75415282                                    |
| 0.066845414                                              | 0.019241461                                                 | 13.90384615                                    |
| 0.059538946                                              | 0.0286468                                                   | 22.08894879                                    |
| 0.048875028                                              | 0.010515099                                                 | 16.37313433                                    |
| 0.055934935                                              | 0.008853761                                                 | 41.6155914                                     |
| 0.048399508                                              | 0.010821998                                                 | 11.03508772                                    |
| 0.054460903                                              | 0.003937064                                                 | 92.42015321                                    |
| 0.051048693                                              | 0.00439448                                                  | 71.67236467                                    |
| 0.053719634                                              | 0.003477356                                                 | 79.66621713                                    |
| 0.055004444                                              | 0.008446135                                                 | 20.62666667                                    |
| 0.067281637                                              | 0.014542424                                                 | 29.67120181                                    |
| 0.050665738                                              | 0.00456352                                                  | 39.72193878                                    |
| 0.058276599                                              | 0.013985936                                                 | 21.50406504                                    |
| 0.046201653                                              | 0.006348302                                                 | 25.41090909                                    |
| 0.047891931                                              | 0.006854995                                                 | 33.28489209                                    |
| 0.053058014                                              | 0.008271314                                                 | 65.20829943                                    |
| 0.058104224                                              | 0.011275771                                                 | 24.11325301                                    |
| 0.059562263                                              | 0.018529757                                                 | 15.96268657                                    |
| 0.073279547                                              | 0.012397227                                                 | 23.37617555                                    |
| 0.051199025                                              | 0.004809082                                                 | 82.73762376                                    |
| 0.06629222                                               | 0.008874141                                                 | 37.25622776                                    |
| 0.067303306                                              | 0.012998103                                                 | 21.60436137                                    |
| 0.058617863                                              | 0.010700792                                                 | 16.88194444                                    |
| 0.061677133                                              | 0.009834692                                                 | 47.18300654                                    |
| 0.054121304                                              | 0.007063252                                                 | 20.72845953                                    |
| 0.045950274                                              | 0.004961146                                                 | 41.03359462                                    |
| 0.046702565                                              | 0.004784805                                                 | 51.60633484                                    |
| 0.053421396                                              | 0.005380862                                                 | 44.66028708                                    |
| 0.0722462                                                | 0.013874176                                                 | 10.54794521                                    |
| 0.063403047                                              | 0.007752261                                                 | 31.00408998                                    |
| 0.053501271                                              | 0.003729971                                                 | 70.94268477                                    |
| 0.059545168                                              | 0.009745851                                                 | 31.02303263                                    |
| 0.047240138                                              | 0.005626711                                                 | 52.76723366                                    |
| 0.050422504                                              | 0.005706362                                                 | 38.01856764                                    |
| 0.054384646                                              | 0.00625993                                                  | 82.39273927                                    |
| 0.057534362                                              | 0.009876024                                                 | 45.27954257                                    |
| 0.049033754                                              | 0.00367493                                                  | 43.98327759                                    |
| 0.048322897                                              | 0.006034378                                                 | 61.37007874                                    |
| 0.077500469                                              | 0.015025641                                                 | 22.63013699                                    |
| 0.052362019                                              | 0.007238262                                                 | 126.8208092                                    |
| 0.052762332                                              | 0.013078547                                                 | 35.77286136                                    |
| 0.050007278                                              | 0.008321452                                                 | 83.31212485                                    |
| 0.053555045                                              | 0.006199933                                                 | 63.94472362                                    |
| 0.049801143                                              | 0.003692453                                                 | 43.576                                         |
| 0.052803439                                              | 0.010234466                                                 | 20.11811024                                    |
| 0.052138972                                              | 0.004723939                                                 | 49.32346723                                    |
| 0.051528195                                              | 0.005080064                                                 | 70.28445748                                    |
| 0.069918784                                              | 0.022728409                                                 | 13.70408163                                    |
| 0.053590085                                              | 0.016637738                                                 | 17.30959752                                    |
| 0.063969704                                              | 0.020073757                                                 | 21.42985075                                    |
| 0.051802483                                              | 0.004769166                                                 | 45.84519774                                    |
| 0.04998619                                               | 0.00742356                                                  | 71.19803371                                    |
| 0.058119075                                              | 0.015766369                                                 | 82.29661017                                    |
| 0.057724391                                              | 0.01392281                                                  | 19.22222222                                    |
| 0.057925926                                              | 0.006434408                                                 | 26.06666667                                    |
| 0.055399565                                              | 0.004824981                                                 | 30.80215827                                    |
| 0.05062686                                               | 0.005979487                                                 | 71.89014085                                    |
| 0.053586957                                              | 0.005257329                                                 | 49.3                                           |
| 0.05221591                                               | 0.013029168                                                 | 27.25670498                                    |
| 0.051665215                                              | 0.003564295                                                 | 149.2091413                                    |
| 0.052847177                                              | 0.007372385                                                 | 26.37074148                                    |
| 0.055511259                                              | 0.00794976                                                  | 45.85230024                                    |
| 0.053880286                                              | 0.004456425                                                 | 106.1441624                                    |
| 0.052175981                                              | 0.002882518                                                 | 113.4827586                                    |
| 0.069401578                                              | 0.025048932                                                 | 14.99074074                                    |
| 0.05167051                                               | 0.005196899                                                 | 50.48208802                                    |
| 0.062819576                                              | 0.008452167                                                 | 18.59459459                                    |
| 0.051260727                                              | 0.00434535                                                  | 94.62730228                                    |
| 0.053596036                                              | 0.004656625                                                 | 103.6011381                                    |
| 0.061798349                                              | 0.00729973                                                  | 39.79813665                                    |
| 0.060180664                                              | 0.009489267                                                 | 23.109375                                      |
| 0.05027953                                               | 0.008275051                                                 | 55.65943993                                    |
| 0.050556906                                              | 0.004274771                                                 | 35.23816356                                    |
| 0.044415008                                              | 0.011420712                                                 | 41.61686233                                    |
| 0.05086772                                               | 0.007979537                                                 | 60.83779264                                    |
| 0.058651949                                              | 0.008630253                                                 | 21.93582888                                    |
| 0.064692628                                              | 0.00761854                                                  | 37.19826087                                    |
| 0.05598789                                               | 0.021529683                                                 | 12.7092511                                     |
| 0.063962152                                              | 0.00877255                                                  | 32.17296223                                    |
| 0.049799137                                              | 0.00399799                                                  | 45.51641138                                    |
| 0.044167921                                              | 0.006667907                                                 | 37.32189349                                    |
| 0.051023786                                              | 0.012433111                                                 | 30.20608108                                    |
| 0.053408171                                              | 0.00678434                                                  | 49.18892508                                    |
| 0.069502553                                              | 0.009921226                                                 | 49.41631505                                    |
| 0.051221827                                              | 0.006957606                                                 | 43.38488784                                    |
| 0.07779374                                               | 0.010001544                                                 | 18.3559322                                     |
| 0.04791497                                               | 0.007380773                                                 | 40.15274463                                    |
| 0.054438958                                              | 0.006231654                                                 | 44.2044335                                     |
| 0.062436573                                              | 0.008825915                                                 | 25.09950249                                    |
| 0.056163194                                              | 0.005667273                                                 | 26.95833333                                    |
| 0.078348357                                              | 0.010744006                                                 | 19.82213439                                    |
| 0.056679105                                              | 0.006682918                                                 | 52.25813449                                    |
| 0.050265861                                              | 0.00511899                                                  | 89.07110609                                    |
| 0.055434677                                              | 0.009309313                                                 | 53.71620227                                    |
| 0.056691251                                              | 0.005223144                                                 | 86.34077479                                    |
| 0.046435222                                              | 0.005335601                                                 | 47.73540856                                    |
| 0.05694655                                               | 0.008061695                                                 | 48.86013986                                    |
| 0.055250679                                              | 0.007617837                                                 | 15.13868613                                    |
| 0.078374669                                              | 0.014163617                                                 | 15.83168317                                    |
| 0.058467566                                              | 0.006493357                                                 | 83.02394366                                    |

| log.sigma.2.5.mm.3D_gldzm_HighIntensityLargeDistanceEmphasis | log.sigma.2.5.mm.3D_gldzm_SmallDistanceEmphasis | log.sigma.2.5.mm.3D_glcm_SumVariance | log.sigma.2.5.mm.3D_glcm_Homogeneity1 |
|--------------------------------------------------------------|-------------------------------------------------|--------------------------------------|---------------------------------------|
| 514.2790698                                                  | 0.996677741                                     | 1689.877905                          | 0.329493339                           |
| 203.8846154                                                  | 1                                               | 553.7386704                          | 0.464095194                           |
| 165.2884097                                                  | 1                                               | 384.6486512                          | 0.453685645                           |
| 331.8925373                                                  | 1                                               | 1098.832822                          | 0.363139876                           |
| 311.9744624                                                  | 1                                               | 1010.116208                          | 0.390012895                           |
| 327.1403509                                                  | 1                                               | 851.3984698                          | 0.357038386                           |
| 446.4124926                                                  | 0.998232174                                     | 1325.388945                          | 0.405759459                           |
| 448.8411681                                                  | 1                                               | 1356.320197                          | 0.414202193                           |
| 513.2178018                                                  | 0.999494268                                     | 1669.834955                          | 0.377762749                           |
| 332.5333333                                                  | 1                                               | 1027.986743                          | 0.381344718                           |
| 174.6099773                                                  | 1                                               | 509.725098                           | 0.409984768                           |
| 498.1556122                                                  | 0.999043367                                     | 1549.686886                          | 0.377353975                           |
| 288.3252033                                                  | 1                                               | 890.6368998                          | 0.502818705                           |
| 689.9418182                                                  | 1                                               | 2320.960302                          | 0.380186753                           |
| 417.4719424                                                  | 1                                               | 1321.586948                          | 0.358754288                           |
| 356.5329536                                                  | 1                                               | 1036.3713                            | 0.413215991                           |
| 237.0746988                                                  | 1                                               | 681.9890664                          | 0.371194235                           |
| 192.6455224                                                  | 1                                               | 527.5519329                          | 0.465769977                           |
| 178.6238245                                                  | 1                                               | 500.7481475                          | 0.438194915                           |
| 413.3248762                                                  | 1                                               | 1202.503681                          | 0.385297226                           |
| 244.2206406                                                  | 1                                               | 698.3481884                          | 0.498386662                           |
| 181.9345794                                                  | 0.997663551                                     | 534.1162896                          | 0.405255769                           |
| 273.1909722                                                  | 1                                               | 823.9616512                          | 0.416828522                           |
| 223.6888889                                                  | 1                                               | 634.5522463                          | 0.414946249                           |
| 506.6266319                                                  | 1                                               | 1555.418155                          | 0.40353391                            |
| 486.0324748                                                  | 1                                               | 1391.580434                          | 0.351922357                           |
| 446.5004525                                                  | 1                                               | 1342.760379                          | 0.368303538                           |
| 411.5095694                                                  | 1                                               | 1282.053038                          | 0.395755808                           |
| 202.7191781                                                  | 1                                               | 521.5321852                          | 0.397600094                           |
| 288.7791411                                                  | 1                                               | 943.1286407                          | 0.436670172                           |
| 522.0648567                                                  | 1                                               | 1648.295917                          | 0.417023969                           |
| 280.8387716                                                  | 1                                               | 944.1906028                          | 0.437864132                           |
| 405.7502238                                                  | 0.997985676                                     | 1244.215381                          | 0.366113648                           |
| 454.096817                                                   | 1                                               | 1448.151996                          | 0.392807654                           |
| 354.559736                                                   | 0.997029703                                     | 1009.502991                          | 0.374291821                           |
| 299.9047014                                                  | 1                                               | 851.300154                           | 0.440759911                           |
| 594.7569677                                                  | 1                                               | 2023.612977                          | 0.438943963                           |
| 482.8047244                                                  | 1                                               | 1407.952763                          | 0.466095631                           |
| 199.0068493                                                  | 1                                               | 663.8212519                          | 0.425536265                           |
| 276.1820809                                                  | 0.999380677                                     | 776.4375764                          | 0.364117019                           |
| 261.7610619                                                  | 1                                               | 852.421266                           | 0.418942233                           |
| 278.5270108                                                  | 0.99954982                                      | 776.0818316                          | 0.313638651                           |
| 357.6624791                                                  | 1                                               | 1120.633478                          | 0.371381189                           |
| 552.1851429                                                  | 1                                               | 1887.404158                          | 0.364815985                           |
| 293.167979                                                   | 1                                               | 821.9662973                          | 0.403582057                           |
| 422.7167019                                                  | 1                                               | 1265.100543                          | 0.383589077                           |
| 402.7785924                                                  | 1                                               | 1206.410423                          | 0.398230954                           |
| 165.3826531                                                  | 1                                               | 443.0236563                          | 0.454389262                           |
| 257.9535604                                                  | 1                                               | 726.8969566                          | 0.364580209                           |
| 190.7462687                                                  | 0.997761194                                     | 478.5800808                          | 0.453987065                           |
| 505.8090395                                                  | 1                                               | 1589.973014                          | 0.357601722                           |
| 316.315309                                                   | 0.999473315                                     | 939.8068589                          | 0.32432095                            |
| 207.3764124                                                  | 1                                               | 597.5829884                          | 0.38898701                            |
| 210.5015015                                                  | 1                                               | 519.4902794                          | 0.395374848                           |
| 346.2377778                                                  | 1                                               | 1030.235659                          | 0.375809915                           |
| 486.4172662                                                  | 1                                               | 1587.381917                          | 0.405540095                           |
| 355.0387324                                                  | 0.998415493                                     | 1104.842898                          | 0.360141627                           |
| 424.2945652                                                  | 1                                               | 1373.941829                          | 0.4092975                             |
| 277.302682                                                   | 1                                               | 889.2945549                          | 0.384794919                           |
| 487.0727147                                                  | 0.998441828                                     | 1514.963263                          | 0.387336426                           |
| 319.743487                                                   | 1                                               | 934.3979612                          | 0.447866096                           |
| 388.433414                                                   | 1                                               | 1229.083903                          | 0.392352733                           |
| 417.1796954                                                  | 0.995050761                                     | 1253.715707                          | 0.384236391                           |
| 561.5356322                                                  | 0.996206897                                     | 1705.792456                          | 0.398002901                           |
| 126.4444444                                                  | 1                                               | 309.1662398                          | 0.427790595                           |
| 508.7338792                                                  | 0.994626407                                     | 1537.931796                          | 0.433991051                           |
| 383.5641892                                                  | 1                                               | 1353.11753                           | 0.443286391                           |
| 439.5617551                                                  | 0.998374865                                     | 1374.691692                          | 0.393907688                           |
| 397.6254527                                                  | 1                                               | 1352.246828                          | 0.391246521                           |
| 297.6273292                                                  | 1                                               | 928.2573142                          | 0.461281141                           |
| 288.1145833                                                  | 1                                               | 908.6645595                          | 0.394515946                           |
| 417.3848238                                                  | 0.99796748                                      | 1240.953521                          | 0.420831754                           |
| 557.4404591                                                  | 1                                               | 1800.396703                          | 0.402646369                           |
| 337.018143                                                   | 1                                               | 1077.655801                          | 0.330301202                           |
| 278.3311037                                                  | 0.99937291                                      | 760.8420928                          | 0.340933209                           |
| 368.0454545                                                  | 1                                               | 1275.526624                          | 0.40623607                            |
| 262.4382609                                                  | 1                                               | 740.2367717                          | 0.453965109                           |
| 219.1497797                                                  | 1                                               | 609.5843092                          | 0.442603507                           |
| 266.5069583                                                  | 0.998508946                                     | 803.5706295                          | 0.411407165                           |
| 548.547046                                                   | 1                                               | 1774.266699                          | 0.336819571                           |
| 515.2698225                                                  | 1                                               | 1696.899312                          | 0.338897413                           |
| 235.6908784                                                  | 1                                               | 707.1118821                          | 0.392764044                           |
| 394.7785016                                                  | 1                                               | 1210.764909                          | 0.417276205                           |
| 198.2320675                                                  | 1                                               | 582.1812145                          | 0.428707206                           |
| 330.8937426                                                  | 0.998229044                                     | 1038.355174                          | 0.358861444                           |
| 242.2669492                                                  | 1                                               | 775.9623685                          | 0.523327662                           |
| 367.2935561                                                  | 1                                               | 1175.228064                          | 0.371111226                           |
| 347.841133                                                   | 1                                               | 1039.34969                           | 0.413263574                           |
| 315.9875622                                                  | 1                                               | 960.1107031                          | 0.422693206                           |
| 439.14375                                                    | 1                                               | 1454.308715                          | 0.438634952                           |
| 212.8498024                                                  | 1                                               | 527.5275519                          | 0.508929779                           |
| 313.516269                                                   | 0.998373102                                     | 941.3844848                          | 0.348122945                           |
| 396.5874718                                                  | 0.997883747                                     | 1206.046983                          | 0.364476485                           |
| 310.8606811                                                  | 1                                               | 969.7710722                          | 0.409945654                           |
| 345.6369009                                                  | 0.999507551                                     | 1099.518655                          | 0.358138051                           |
| 564.0389105                                                  | 0.998540856                                     | 1769.56024                           | 0.413155895                           |
| 258.5221445                                                  | 1                                               | 757.3049018                          | 0.394261812                           |
| 390.0875912                                                  | 1                                               | 1422.230914                          | 0.424427285                           |
| 189.7772277                                                  | 1                                               | 626.1481738                          | 0.448936                              |
| 300.4753521                                                  | 0.999471831                                     | 854.821252                           | 0.454607299                           |

| log.sigma.2.5.mm.3D_glcmm_Homogeneity2 | log.sigma.2.5.mm.3D_glcmm_ClusterShade | log.sigma.2.5.mm.3D_glcmm_MaximumProbability | log.sigma.2.5.mm.3D_glcmm_Idmn | log.sigma.2.5.mm.3D_glcmm_SumVariance2 |
|----------------------------------------|----------------------------------------|----------------------------------------------|--------------------------------|----------------------------------------|
| 0.246781854                            | -749.7890662                           | 0.020776659                                  | 0.971056173                    | 86.50622762                            |
| 0.396566108                            | 68.79826848                            | 0.069414413                                  | 0.984897452                    | 27.71780127                            |
| 0.383627524                            | 60.76655242                            | 0.044865527                                  | 0.982204527                    | 33.85693666                            |
| 0.281675329                            | -303.1639532                           | 0.028736526                                  | 0.974527605                    | 63.83526871                            |
| 0.309709797                            | -137.7474902                           | 0.040675829                                  | 0.979408544                    | 43.59787724                            |
| 0.271091411                            | 252.2168798                            | 0.02619317                                   | 0.979897778                    | 62.87050028                            |
| 0.327347195                            | 64.2020818                             | 0.045847696                                  | 0.989996925                    | 42.17192652                            |
| 0.337871116                            | 27.25783496                            | 0.040515062                                  | 0.988942528                    | 41.17411069                            |
| 0.296700008                            | -128.3187259                           | 0.021722233                                  | 0.984860512                    | 49.33445777                            |
| 0.297615501                            | -166.4495844                           | 0.025940298                                  | 0.980084325                    | 46.91037206                            |
| 0.330190834                            | -42.8104962                            | 0.032851692                                  | 0.979788963                    | 29.53574075                            |
| 0.296658238                            | -130.4867873                           | 0.028392881                                  | 0.981977825                    | 53.2203012                             |
| 0.445525176                            | 21.07021306                            | 0.12540045                                   | 0.986983693                    | 33.97964296                            |
| 0.300157919                            | -389.6126848                           | 0.04077463                                   | 0.984636533                    | 65.61300713                            |
| 0.278091417                            | -249.3193493                           | 0.027704977                                  | 0.980979325                    | 58.93967529                            |
| 0.338745683                            | -45.14043132                           | 0.048143372                                  | 0.98471163                     | 44.32356045                            |
| 0.286748849                            | -159.9678629                           | 0.023817496                                  | 0.975199718                    | 44.60457777                            |
| 0.400447104                            | 125.1963973                            | 0.062046056                                  | 0.985098753                    | 32.80785757                            |
| 0.36326156                             | 39.22970406                            | 0.045073459                                  | 0.986590033                    | 23.37036829                            |
| 0.303254637                            | 35.96873811                            | 0.030395171                                  | 0.986947932                    | 47.87498777                            |
| 0.437990945                            | 48.28366034                            | 0.092806919                                  | 0.989390065                    | 26.66347028                            |
| 0.322907756                            | 2.311523268                            | 0.02771831                                   | 0.977910325                    | 28.28149282                            |
| 0.341050575                            | 10.27028291                            | 0.040669576                                  | 0.98302931                     | 35.57674819                            |
| 0.337807382                            | 40.54392382                            | 0.03155574                                   | 0.982776731                    | 34.50887625                            |
| 0.326261241                            | -4.910267092                           | 0.043097666                                  | 0.986720461                    | 44.1599282                             |
| 0.265966369                            | -60.83060093                           | 0.01920626                                   | 0.984251635                    | 68.6581432                             |
| 0.287226148                            | -37.12894835                           | 0.029936837                                  | 0.983671895                    | 63.07515465                            |
| 0.317273824                            | -113.9102541                           | 0.032666425                                  | 0.984296461                    | 41.2761037                             |
| 0.312250501                            | 61.60382024                            | 0.035223922                                  | 0.978602823                    | 27.97437054                            |
| 0.363821364                            | -56.86987813                           | 0.04286048                                   | 0.986043743                    | 28.54521701                            |
| 0.343235116                            | -59.94257093                           | 0.047211645                                  | 0.988143966                    | 45.70067198                            |
| 0.369162812                            | -205.9409207                           | 0.055668045                                  | 0.981092435                    | 32.55588885                            |
| 0.285164893                            | -145.785034                            | 0.021574766                                  | 0.980028831                    | 62.62989563                            |
| 0.31582593                             | -299.4220672                           | 0.036090906                                  | 0.981330112                    | 55.17906623                            |
| 0.290257259                            | -35.22414616                           | 0.030152034                                  | 0.987135314                    | 45.52282757                            |
| 0.370197228                            | -37.40241591                           | 0.063429177                                  | 0.986826331                    | 37.71348758                            |
| 0.371409885                            | -167.8568927                           | 0.057290717                                  | 0.990914923                    | 40.59343284                            |
| 0.402567885                            | -76.4893356                            | 0.102810577                                  | 0.98755934                     | 53.07521928                            |
| 0.349101482                            | -75.44259786                           | 0.036066275                                  | 0.980083198                    | 19.10460155                            |
| 0.277780149                            | -4.985029796                           | 0.015496545                                  | 0.980751744                    | 55.7564326                             |
| 0.346002609                            | -249.7801618                           | 0.047974724                                  | 0.982578165                    | 42.52289777                            |
| 0.222408384                            | 69.92719515                            | 0.011440889                                  | 0.976762136                    | 70.28332481                            |
| 0.28731367                             | -106.5824734                           | 0.025426771                                  | 0.980031972                    | 47.40897608                            |
| 0.283284359                            | -294.276966                            | 0.026923635                                  | 0.985112315                    | 56.55198413                            |
| 0.324770323                            | 74.78391376                            | 0.03786656                                   | 0.983603403                    | 41.94558316                            |
| 0.302925719                            | -60.21400712                           | 0.03094837                                   | 0.985473925                    | 47.47554004                            |
| 0.31984269                             | 26.44080328                            | 0.036035339                                  | 0.987072307                    | 42.70529083                            |
| 0.382724172                            | 46.18127617                            | 0.052957039                                  | 0.983812947                    | 23.18006816                            |
| 0.279851726                            | -115.2759933                           | 0.023801072                                  | 0.97232361                     | 51.93840059                            |
| 0.384059087                            | 157.4012424                            | 0.061633445                                  | 0.987115038                    | 37.2644102                             |
| 0.271344073                            | -159.4903227                           | 0.024713874                                  | 0.982022398                    | 55.60967527                            |
| 0.234492512                            | -30.90406603                           | 0.016267267                                  | 0.981452727                    | 58.8719107                             |
| 0.307119718                            | -11.21951289                           | 0.026285845                                  | 0.982249804                    | 38.13099221                            |
| 0.313575324                            | 111.3825731                            | 0.029253187                                  | 0.978360067                    | 36.76913962                            |
| 0.291013079                            | 47.4636573                             | 0.022838196                                  | 0.980994736                    | 44.75605424                            |
| 0.327797316                            | -105.672744                            | 0.03965461                                   | 0.987716439                    | 38.73035881                            |
| 0.274327871                            | -128.8987056                           | 0.020330958                                  | 0.980303185                    | 48.67905257                            |
| 0.334147903                            | -250.8223648                           | 0.039060461                                  | 0.986623535                    | 45.18962746                            |
| 0.303488308                            | -119.0007898                           | 0.032781484                                  | 0.979772627                    | 38.4930307                             |
| 0.309818704                            | -142.8948546                           | 0.03661726                                   | 0.984270085                    | 53.08784918                            |
| 0.379999835                            | 167.319932                             | 0.067881405                                  | 0.987659214                    | 38.42408349                            |
| 0.312584847                            | -90.85941585                           | 0.041330403                                  | 0.984456483                    | 39.89996581                            |
| 0.303772189                            | -64.1425751                            | 0.034078726                                  | 0.983922875                    | 48.13562583                            |
| 0.318425435                            | 66.94531518                            | 0.027602265                                  | 0.989208205                    | 48.15770984                            |
| 0.351333644                            | 23.30757838                            | 0.04304855                                   | 0.980161939                    | 27.7883789                             |
| 0.363715492                            | -108.0468214                           | 0.059053714                                  | 0.98815087                     | 40.1752498                             |
| 0.374382272                            | -101.0224396                           | 0.061163443                                  | 0.987362417                    | 23.45006881                            |
| 0.3157792                              | -52.18883745                           | 0.031598683                                  | 0.986795882                    | 49.58017799                            |
| 0.311174451                            | -158.9579851                           | 0.024120094                                  | 0.988697953                    | 45.41715795                            |
| 0.393736045                            | -3.665769301                           | 0.055892073                                  | 0.987120852                    | 24.6120539                             |
| 0.313791306                            | -138.1316585                           | 0.036181544                                  | 0.982725441                    | 40.45609147                            |
| 0.345504194                            | 15.24319609                            | 0.039704756                                  | 0.989568197                    | 45.08974711                            |
| 0.325890026                            | -266.6235268                           | 0.037637945                                  | 0.987337407                    | 49.52034809                            |
| 0.245376369                            | -345.8883841                           | 0.022348421                                  | 0.970050154                    | 66.55037384                            |
| 0.253127456                            | 38.76292328                            | 0.01636681                                   | 0.979558139                    | 57.84310903                            |
| 0.329174965                            | -353.9177704                           | 0.043096775                                  | 0.980980266                    | 38.70280002                            |
| 0.383686475                            | 65.45815631                            | 0.046961101                                  | 0.988036806                    | 26.18860352                            |
| 0.371849073                            | 69.80677273                            | 0.057532271                                  | 0.984131575                    | 37.26181041                            |
| 0.331903486                            | -13.88283986                           | 0.04385822                                   | 0.985150092                    | 31.13871419                            |
| 0.250406693                            | -511.8366671                           | 0.017343981                                  | 0.982111091                    | 77.51790394                            |
| 0.257008651                            | -771.8288093                           | 0.022871058                                  | 0.972627501                    | 86.77707248                            |
| 0.317603655                            | -79.90412445                           | 0.038427413                                  | 0.97940813                     | 44.52804778                            |
| 0.342437356                            | -23.81942855                           | 0.049302077                                  | 0.985245251                    | 40.07901869                            |
| 0.35215863                             | -82.64685066                           | 0.032125136                                  | 0.981796751                    | 29.31358128                            |
| 0.274099956                            | -154.9604963                           | 0.023933332                                  | 0.979438922                    | 55.11922604                            |
| 0.46825799                             | 38.52354934                            | 0.097908987                                  | 0.990842897                    | 20.46437842                            |
| 0.293081594                            | -391.8111231                           | 0.036752722                                  | 0.977223227                    | 59.73349672                            |
| 0.336710879                            | -20.2233035                            | 0.04483337                                   | 0.984140988                    | 43.66122378                            |
| 0.34699093                             | -94.44328051                           | 0.03713245                                   | 0.984897889                    | 36.33210894                            |
| 0.367998113                            | -118.6859011                           | 0.056622133                                  | 0.987108705                    | 34.53524284                            |
| 0.451547289                            | 145.6898604                            | 0.106147818                                  | 0.988489291                    | 26.2442789                             |
| 0.258981658                            | -25.36855744                           | 0.017542393                                  | 0.978277899                    | 54.08798287                            |
| 0.28132013                             | -191.2254227                           | 0.023701597                                  | 0.983544462                    | 49.99684336                            |
| 0.333460616                            | -140.5940202                           | 0.038747965                                  | 0.981615768                    | 43.23693521                            |
| 0.27183497                             | -143.6984562                           | 0.024414837                                  | 0.979630487                    | 41.62452677                            |
| 0.34135705                             | -246.7880694                           | 0.054834406                                  | 0.985459107                    | 61.87211025                            |
| 0.312908299                            | -21.50487147                           | 0.028458917                                  | 0.983662277                    | 43.22244722                            |
| 0.35557357                             | -339.5058282                           | 0.052330512                                  | 0.983385178                    | 42.83593961                            |
| 0.37891769                             | -87.12680635                           | 0.046991566                                  | 0.980016493                    | 24.21330666                            |
| 0.386490425                            | 90.47390821                            | 0.067961056                                  | 0.988033668                    | 33.15696688                            |

| log.sigma.2.5.mm.3D_glcmm_Contrast | log.sigma.2.5.mm.3D_glcmm_DifferenceEntropy | log.sigma.2.5.mm.3D_glcmm_InverseVariance | log.sigma.2.5.mm.3D_glcmm_Entropy | log.sigma.2.5.mm.3D_glcmm_Dissimilarity |
|------------------------------------|---------------------------------------------|-------------------------------------------|-----------------------------------|-----------------------------------------|
| 42.84265244                        | 3.718994018                                 | 0.245242852                               | 8.294147017                       | 4.629852204                             |
| 10.26387317                        | 2.777280232                                 | 0.366134975                               | 6.474130026                       | 2.234915565                             |
| 11.2375446                         | 2.84844018                                  | 0.349599567                               | 6.933584866                       | 2.359761851                             |
| 27.81236508                        | 3.401434709                                 | 0.286121618                               | 7.717960348                       | 3.707930337                             |
| 19.16447088                        | 3.206178373                                 | 0.301635718                               | 7.504050413                       | 3.134693977                             |
| 22.32892016                        | 3.292757524                                 | 0.272065887                               | 7.523728193                       | 3.515550278                             |
| 15.98777595                        | 3.103271879                                 | 0.314345647                               | 7.45413409                        | 2.879556295                             |
| 16.0475907                         | 3.091595314                                 | 0.322715444                               | 7.319279311                       | 2.829072725                             |
| 22.25970912                        | 3.305841862                                 | 0.290668072                               | 7.817299994                       | 3.379494004                             |
| 17.08009477                        | 3.130252182                                 | 0.302775106                               | 7.364160779                       | 3.048868504                             |
| 12.64879968                        | 2.953412594                                 | 0.327017098                               | 7.039879558                       | 2.643162313                             |
| 22.78513207                        | 3.306480752                                 | 0.296923037                               | 7.643985082                       | 3.386627132                             |
| 11.40864657                        | 2.734533832                                 | 0.381757475                               | 6.277921126                       | 2.124005211                             |
| 27.41535333                        | 3.348664507                                 | 0.292494813                               | 7.667498234                       | 3.519317264                             |
| 31.60381096                        | 3.49764548                                  | 0.275735416                               | 7.77253168                        | 3.944743975                             |
| 18.25567806                        | 3.125898138                                 | 0.330549192                               | 7.399219159                       | 2.93237995                              |
| 20.14568485                        | 3.236276379                                 | 0.289640169                               | 7.561837549                       | 3.284940737                             |
| 10.93938637                        | 2.808046436                                 | 0.372940032                               | 6.573745757                       | 2.276163456                             |
| 9.616017873                        | 2.775644077                                 | 0.353773097                               | 6.637676288                       | 2.301667686                             |
| 17.96473537                        | 3.179867442                                 | 0.301253192                               | 7.640148405                       | 3.093825107                             |
| 8.258891118                        | 2.63897628                                  | 0.386688977                               | 6.440508326                       | 1.957733719                             |
| 11.58375584                        | 2.907168657                                 | 0.322451058                               | 6.992792883                       | 2.596953357                             |
| 14.51485024                        | 2.996282916                                 | 0.339638709                               | 6.990687718                       | 2.705844958                             |
| 13.58603882                        | 2.99427759                                  | 0.32446159                                | 7.242531724                       | 2.678896991                             |
| 20.06605307                        | 3.145999154                                 | 0.320696479                               | 7.189112639                       | 3.03133058                              |
| 25.82094047                        | 3.394231347                                 | 0.270899107                               | 7.979005899                       | 3.681460691                             |
| 27.05569709                        | 3.411265196                                 | 0.281810364                               | 7.969133419                       | 3.654214746                             |
| 19.83802896                        | 3.198467213                                 | 0.313616728                               | 7.386957115                       | 3.107265015                             |
| 11.12322963                        | 2.858144689                                 | 0.31657859                                | 6.748883357                       | 2.594814823                             |
| 11.80508618                        | 2.868522702                                 | 0.358768415                               | 6.828749779                       | 2.433499879                             |
| 18.40261624                        | 3.135081553                                 | 0.328252303                               | 7.393775243                       | 2.9284753                               |
| 16.67907871                        | 3.03295089                                  | 0.352215558                               | 6.875769097                       | 2.724335268                             |
| 27.00165904                        | 3.409741798                                 | 0.285612111                               | 8.026009975                       | 3.66880586                              |
| 24.01107972                        | 3.302685313                                 | 0.303224747                               | 7.617110528                       | 3.351923999                             |
| 19.79352869                        | 3.234656321                                 | 0.292268851                               | 7.680615576                       | 3.237561974                             |
| 13.69821604                        | 2.951801676                                 | 0.349534167                               | 6.971383566                       | 2.551372561                             |
| 19.80400571                        | 3.0688862                                   | 0.355010345                               | 7.043901279                       | 2.829713638                             |
| 19.66882782                        | 3.103361048                                 | 0.322235263                               | 7.200890376                       | 2.799536365                             |
| 11.62608327                        | 2.876839788                                 | 0.346849546                               | 6.543363393                       | 2.477959174                             |
| 20.01174838                        | 3.265602012                                 | 0.278091606                               | 8.017329122                       | 3.335659154                             |
| 18.58354684                        | 3.118163793                                 | 0.333902745                               | 7.211747437                       | 2.921490709                             |
| 30.92738194                        | 3.558938104                                 | 0.226198079                               | 8.411246531                       | 4.248750494                             |
| 21.22820357                        | 3.263982467                                 | 0.288352778                               | 7.745317647                       | 3.325587991                             |
| 28.37654932                        | 3.432334098                                 | 0.281483207                               | 7.786299101                       | 3.725092136                             |
| 14.84360907                        | 3.042561598                                 | 0.325915409                               | 7.178490893                       | 2.809631289                             |
| 20.19918431                        | 3.23036519                                  | 0.304481542                               | 7.5995334                         | 3.214393057                             |
| 17.90549497                        | 3.156203364                                 | 0.316934911                               | 7.456916683                       | 3.009366186                             |
| 8.386330252                        | 2.687721291                                 | 0.369000568                               | 6.370006466                       | 2.140385782                             |
| 22.94482495                        | 3.305968893                                 | 0.278661313                               | 7.544627339                       | 3.475026151                             |
| 10.06200015                        | 2.776456778                                 | 0.365074199                               | 6.752171589                       | 2.26080029                              |
| 24.25726727                        | 3.350026594                                 | 0.274034095                               | 7.828887701                       | 3.545755077                             |
| 28.80911721                        | 3.507214649                                 | 0.24176716                                | 8.168917918                       | 4.050125122                             |
| 16.0783534                         | 3.116971838                                 | 0.31097229                                | 7.479242932                       | 2.964001164                             |
| 14.85419396                        | 3.037327958                                 | 0.315822172                               | 7.177816739                       | 2.84583978                              |
| 17.25166307                        | 3.151690592                                 | 0.294925229                               | 7.519568914                       | 3.108354278                             |
| 17.00481681                        | 3.10679934                                  | 0.320727695                               | 7.226399733                       | 2.91388427                              |
| 21.94256035                        | 3.311819425                                 | 0.278489211                               | 7.83289413                        | 3.453466907                             |
| 19.93488547                        | 3.157286144                                 | 0.328343398                               | 7.353384266                       | 3.017527812                             |
| 20.16943472                        | 3.22026753                                  | 0.301905782                               | 7.363910984                       | 3.193777864                             |
| 24.63273516                        | 3.368191751                                 | 0.288220502                               | 7.945701326                       | 3.466939613                             |
| 15.49357483                        | 3.00463011                                  | 0.34553271                                | 6.877239327                       | 2.629825766                             |
| 18.36136944                        | 3.169320482                                 | 0.313263784                               | 7.37748896                        | 3.055320325                             |
| 20.00492233                        | 3.248047855                                 | 0.300037536                               | 7.678169329                       | 3.223055663                             |
| 17.37587028                        | 3.141985958                                 | 0.311262557                               | 7.593787236                       | 2.980800819                             |
| 10.39168412                        | 2.804378347                                 | 0.350361861                               | 6.781263154                       | 2.400979555                             |
| 17.58783999                        | 3.071347571                                 | 0.341230065                               | 7.146108026                       | 2.785263665                             |
| 15.17247349                        | 2.956871596                                 | 0.358175898                               | 6.514688538                       | 2.585806603                             |
| 21.63959378                        | 3.251252799                                 | 0.306983718                               | 7.687717042                       | 3.220254859                             |
| 19.20207413                        | 3.194537743                                 | 0.307971477                               | 7.602711037                       | 3.10797178                              |
| 10.12285423                        | 2.767128167                                 | 0.377088335                               | 6.627308578                       | 2.217072115                             |
| 16.86711249                        | 3.109199106                                 | 0.309610684                               | 7.294895597                       | 2.974689892                             |
| 16.19184699                        | 3.036554484                                 | 0.336113903                               | 7.274941343                       | 2.746573718                             |
| 20.82758238                        | 3.201938351                                 | 0.315087881                               | 7.452094383                       | 3.114774837                             |
| 34.63866926                        | 3.602357061                                 | 0.251740332                               | 8.151314861                       | 4.291863011                             |
| 25.58210927                        | 3.424719278                                 | 0.256325725                               | 8.120209809                       | 3.78867117                              |
| 19.34684073                        | 3.124789437                                 | 0.322375325                               | 7.005161894                       | 2.994819733                             |
| 9.298903002                        | 2.734833737                                 | 0.374495493                               | 6.697487985                       | 2.192098034                             |
| 12.62151431                        | 2.895975976                                 | 0.355600253                               | 6.764150752                       | 2.473777252                             |
| 13.4387144                         | 2.978919018                                 | 0.325276728                               | 7.03831735                        | 2.670882832                             |
| 32.83685572                        | 3.534601809                                 | 0.256714116                               | 8.175575173                       | 4.094365266                             |
| 40.49649462                        | 3.662424025                                 | 0.25508622                                | 8.194487569                       | 4.447825122                             |
| 25.10563119                        | 3.329836751                                 | 0.305929172                               | 7.502872839                       | 3.429498966                             |
| 18.57852669                        | 3.136477926                                 | 0.315819491                               | 7.329144237                       | 2.952461899                             |
| 10.40935896                        | 2.818577281                                 | 0.350797713                               | 6.997460713                       | 2.389627326                             |
| 24.53117552                        | 3.36594886                                  | 0.274890956                               | 7.874796566                       | 3.596772696                             |
| 5.547011349                        | 2.411534876                                 | 0.419053889                               | 5.94509919                        | 1.651081022                             |
| 29.25715849                        | 3.462306574                                 | 0.281131146                               | 7.869191717                       | 3.797249056                             |
| 15.45164367                        | 3.064299083                                 | 0.327063438                               | 7.338355401                       | 2.796786002                             |
| 13.76733539                        | 2.96481917                                  | 0.339010839                               | 6.98989834                        | 2.629608721                             |
| 14.47084794                        | 2.935432436                                 | 0.359619314                               | 6.887709479                       | 2.55936789                              |
| 7.06224246                         | 2.544332302                                 | 0.402467878                               | 5.930796003                       | 1.836055611                             |
| 21.10781281                        | 3.308843488                                 | 0.260517757                               | 7.910452165                       | 3.513952315                             |
| 24.35214223                        | 3.368325166                                 | 0.283155934                               | 7.837236379                       | 3.546518015                             |
| 17.08712914                        | 3.101938036                                 | 0.325711209                               | 7.357959757                       | 2.891153073                             |
| 21.35854029                        | 3.292051477                                 | 0.282680012                               | 7.715544334                       | 3.421955218                             |
| 24.44274511                        | 3.261091145                                 | 0.322206763                               | 7.566580374                       | 3.233665153                             |
| 15.42526596                        | 3.087247292                                 | 0.310843652                               | 7.489239946                       | 2.905626195                             |
| 21.24814582                        | 3.147525053                                 | 0.343864569                               | 6.923172445                       | 3.035311999                             |
| 10.71861652                        | 2.797055118                                 | 0.36967132                                | 6.524789334                       | 2.3161965                               |
| 12.29605039                        | 2.904570711                                 | 0.354065025                               | 6.907027476                       | 2.422301993                             |

| log.sigma.2.5.mm.3D_glcm_DifferenceVariance | log.sigma.2.5.mm.3D_glcm_ldn | log.sigma.2.5.mm.3D_glcm_ldm | log.sigma.2.5.mm.3D_glcm_Correlation | log.sigma.2.5.mm.3D_glcm_Autocorrelation |
|---------------------------------------------|------------------------------|------------------------------|--------------------------------------|------------------------------------------|
| 20.92647971                                 | 0.89608637                   | 0.246781854                  | 0.342185048                          | 520.5115949                              |
| 5.183501069                                 | 0.923692329                  | 0.396566108                  | 0.450678817                          | 188.900074                               |
| 5.510649334                                 | 0.917039842                  | 0.383627524                  | 0.498319448                          | 140.4878255                              |
| 13.66531426                                 | 0.902199353                  | 0.281675329                  | 0.397100802                          | 352.7361792                              |
| 9.158430444                                 | 0.90963854                   | 0.309709797                  | 0.390347113                          | 325.8536009                              |
| 9.49329203                                  | 0.907470485                  | 0.271091411                  | 0.472113178                          | 281.4619523                              |
| 7.532765222                                 | 0.934964042                  | 0.327347195                  | 0.450731203                          | 416.2054212                              |
| 7.935245685                                 | 0.933206692                  | 0.337871116                  | 0.438272233                          | 423.9608799                              |
| 10.5476072                                  | 0.921780455                  | 0.296700008                  | 0.382127504                          | 514.6221483                              |
| 7.620023787                                 | 0.908303275                  | 0.297615501                  | 0.464022266                          | 331.7574493                              |
| 5.511040108                                 | 0.907295628                  | 0.330190834                  | 0.396214876                          | 177.366042                               |
| 11.12881602                                 | 0.915926456                  | 0.296658238                  | 0.403504366                          | 480.654998                               |
| 6.787683331                                 | 0.935415142                  | 0.445525176                  | 0.494756541                          | 285.8160127                              |
| 14.69546759                                 | 0.925319934                  | 0.300157919                  | 0.412909                             | 695.2204071                              |
| 15.6898761                                  | 0.915172396                  | 0.278091417                  | 0.307160834                          | 414.3959082                              |
| 9.424778981                                 | 0.924367223                  | 0.338745683                  | 0.419812875                          | 333.4473101                              |
| 9.112939316                                 | 0.899593138                  | 0.286748849                  | 0.374672234                          | 230.1862293                              |
| 5.651754002                                 | 0.925344537                  | 0.400447104                  | 0.48603573                           | 181.799168                               |
| 4.221763571                                 | 0.923203306                  | 0.36326156                   | 0.413245842                          | 173.5344346                              |
| 8.210603715                                 | 0.925449879                  | 0.303254637                  | 0.454710077                          | 382.5964044                              |
| 4.3524512                                   | 0.936762033                  | 0.437990945                  | 0.520833923                          | 231.8513261                              |
| 4.739080738                                 | 0.900909519                  | 0.322907756                  | 0.415643382                          | 185.0610707                              |
| 7.069866615                                 | 0.918022469                  | 0.341050575                  | 0.416198914                          | 270.2027915                              |
| 6.262142048                                 | 0.915680189                  | 0.337807382                  | 0.432992546                          | 215.9679689                              |
| 10.64556446                                 | 0.929620733                  | 0.326261241                  | 0.377680923                          | 478.6967495                              |
| 11.93359142                                 | 0.919245988                  | 0.265966369                  | 0.44656245                           | 438.574361                               |
| 13.37132326                                 | 0.920407245                  | 0.287226148                  | 0.401915218                          | 423.3504058                              |
| 10.01135413                                 | 0.922192771                  | 0.317273824                  | 0.35196925                           | 401.966918                               |
| 4.293580788                                 | 0.900530571                  | 0.312250501                  | 0.427279862                          | 180.1707903                              |
| 5.755860238                                 | 0.925215587                  | 0.363821364                  | 0.415374091                          | 303.6261701                              |
| 9.657361582                                 | 0.933249367                  | 0.343235116                  | 0.426881836                          | 506.6125596                              |
| 9.081318159                                 | 0.918954249                  | 0.369162812                  | 0.32471587                           | 301.6954249                              |
| 13.20862127                                 | 0.912340471                  | 0.285164893                  | 0.400602712                          | 395.8014198                              |
| 12.50968076                                 | 0.917471578                  | 0.31582593                   | 0.395121522                          | 451.1224159                              |
| 9.124395534                                 | 0.926031156                  | 0.290257259                  | 0.393804117                          | 326.5281301                              |
| 7.052085257                                 | 0.929145673                  | 0.370197228                  | 0.464302315                          | 278.1771466                              |
| 11.60151955                                 | 0.945025872                  | 0.371409885                  | 0.346307905                          | 605.3270346                              |
| 11.5769314                                  | 0.930770788                  | 0.402567885                  | 0.461453176                          | 438.7086259                              |
| 5.391011936                                 | 0.909468587                  | 0.349101482                  | 0.243730968                          | 218.7427378                              |
| 8.679214316                                 | 0.909014642                  | 0.277780149                  | 0.471465392                          | 261.4065016                              |
| 9.829205369                                 | 0.920759418                  | 0.346002609                  | 0.39241623                           | 278.2056019                              |
| 12.42627357                                 | 0.898579249                  | 0.222408384                  | 0.39354106                           | 260.1733276                              |
| 9.830660471                                 | 0.909953413                  | 0.28731367                   | 0.388601387                          | 358.8071283                              |
| 14.2216902                                  | 0.924182525                  | 0.283284359                  | 0.333948656                          | 573.6470342                              |
| 6.817738636                                 | 0.91731646                   | 0.324770323                  | 0.473691422                          | 271.2809881                              |
| 9.674195582                                 | 0.923309553                  | 0.302925719                  | 0.401569005                          | 399.1599697                              |
| 8.692593719                                 | 0.927662114                  | 0.31984269                   | 0.408916417                          | 381.4502802                              |
| 3.730515809                                 | 0.916759195                  | 0.382724172                  | 0.463875841                          | 155.859254                               |
| 10.59941142                                 | 0.895065824                  | 0.279851726                  | 0.387527016                          | 243.9295765                              |
| 4.820860737                                 | 0.927508989                  | 0.384059087                  | 0.562613824                          | 168.5235579                              |
| 11.48347804                                 | 0.914251352                  | 0.271344073                  | 0.392838274                          | 492.7601403                              |
| 12.07907076                                 | 0.909463204                  | 0.234492512                  | 0.347001044                          | 307.0876934                              |
| 7.160357785                                 | 0.91314051                   | 0.307119718                  | 0.403147373                          | 205.2576668                              |
| 6.566462873                                 | 0.904794042                  | 0.313575324                  | 0.421917027                          | 181.1443953                              |
| 7.394436018                                 | 0.909234891                  | 0.291013079                  | 0.438828949                          | 332.6446338                              |
| 8.347568523                                 | 0.929765161                  | 0.327797316                  | 0.391676507                          | 487.8871502                              |
| 9.766740183                                 | 0.909056347                  | 0.274327871                  | 0.379792732                          | 354.3253693                              |
| 10.63680488                                 | 0.930026825                  | 0.334147903                  | 0.390233157                          | 427.9304204                              |
| 9.791547929                                 | 0.910945196                  | 0.303488308                  | 0.312388618                          | 289.2240965                              |
| 12.37765942                                 | 0.922362752                  | 0.309818704                  | 0.36812275                           | 471.3542053                              |
| 8.466565468                                 | 0.933374666                  | 0.379999835                  | 0.421684901                          | 301.1796409                              |
| 8.884522569                                 | 0.920886424                  | 0.312584847                  | 0.372216672                          | 387.3122194                              |
| 9.453466037                                 | 0.919116586                  | 0.303772189                  | 0.412669399                          | 396.3196884                              |
| 8.287457441                                 | 0.933029009                  | 0.318425435                  | 0.466074015                          | 524.3550025                              |
| 4.487386009                                 | 0.907972941                  | 0.351333644                  | 0.448916947                          | 116.0368838                              |
| 9.663057948                                 | 0.935009197                  | 0.363715492                  | 0.395210091                          | 472.8008342                              |
| 8.349056405                                 | 0.932638767                  | 0.374882272                  | 0.222880911                          | 413.5788702                              |
| 11.08177983                                 | 0.928885806                  | 0.3157792                    | 0.393523588                          | 430.6082568                              |
| 9.334103457                                 | 0.932176874                  | 0.311174451                  | 0.40692489                           | 424.3695915                              |
| 5.12039618                                  | 0.929092264                  | 0.393736045                  | 0.411556376                          | 297.8194338                              |
| 7.704135566                                 | 0.915780165                  | 0.313791306                  | 0.416107381                          | 295.9693691                              |
| 8.519016996                                 | 0.936836823                  | 0.345504194                  | 0.472620467                          | 391.9764054                              |
| 10.93442816                                 | 0.931126356                  | 0.325890026                  | 0.406551228                          | 548.7713274                              |
| 15.83086409                                 | 0.891407615                  | 0.245376369                  | 0.31864747                           | 345.6926616                              |
| 10.89634621                                 | 0.906181309                  | 0.253127456                  | 0.386074747                          | 255.3836736                              |
| 10.08259395                                 | 0.916575972                  | 0.329174965                  | 0.340352126                          | 396.7370478                              |
| 4.418049                                    | 0.929281253                  | 0.383686475                  | 0.467220035                          | 244.7454626                              |
| 6.351061327                                 | 0.922095777                  | 0.371849073                  | 0.494650554                          | 207.4327028                              |
| 6.195129497                                 | 0.920818757                  | 0.331903486                  | 0.39577344                           | 264.1483016                              |
| 15.66217968                                 | 0.915558744                  | 0.250406693                  | 0.406827881                          | 545.5047835                              |
| 20.2582538                                  | 0.899818559                  | 0.257008651                  | 0.367880267                          | 522.6141857                              |
| 13.09159397                                 | 0.913756617                  | 0.317603655                  | 0.280957782                          | 235.7691661                              |
| 9.588345942                                 | 0.925920477                  | 0.342437356                  | 0.3706591                            | 381.6497576                              |
| 4.542423183                                 | 0.911846879                  | 0.35215863                   | 0.474938889                          | 199.8437328                              |
| 11.27926178                                 | 0.908683651                  | 0.274099956                  | 0.385891139                          | 335.595172                               |
| 2.770572211                                 | 0.939271917                  | 0.46825799                   | 0.570078078                          | 252.0214362                              |
| 14.4405892                                  | 0.90780183                   | 0.293081594                  | 0.34564692                           | 373.0908434                              |
| 7.516908709                                 | 0.920498527                  | 0.336710879                  | 0.474720218                          | 334.9680829                              |
| 6.71270603                                  | 0.92241237                   | 0.34699093                   | 0.447257569                          | 310.1586338                              |
| 7.77756789                                  | 0.931216129                  | 0.367998113                  | 0.411488829                          | 448.1688449                              |
| 3.60710067                                  | 0.933542957                  | 0.451547289                  | 0.566575484                          | 178.8436399                              |
| 8.549286651                                 | 0.901579398                  | 0.258981658                  | 0.438473657                          | 308.7887826                              |
| 11.56145456                                 | 0.918373845                  | 0.28132013                   | 0.347459662                          | 382.5671014                              |
| 8.553290175                                 | 0.916148377                  | 0.333460616                  | 0.430153249                          | 314.1899246                              |
| 9.424850418                                 | 0.907166505                  | 0.27183497                   | 0.324895801                          | 351.0358343                              |
| 13.73711088                                 | 0.929633808                  | 0.34135705                   | 0.433336711                          | 542.4941522                              |
| 6.820730031                                 | 0.910758084                  | 0.312908299                  | 0.473524819                          | 253.8951615                              |
| 11.76040024                                 | 0.924992416                  | 0.35557357                   | 0.34466438                           | 438.3865196                              |
| 5.223289167                                 | 0.911922174                  | 0.37891769                   | 0.383927557                          | 209.9033343                              |
| 6.313990968                                 | 0.932284983                  | 0.386490425                  | 0.457851579                          | 278.8363808                              |

| log.sigma.2.5.mm.3D_glc_m_SumEntropy | log.sigma.2.5.mm.3D_glc_m_AverageIntensity | log.sigma.2.5.mm.3D_glc_m_Energy | log.sigma.2.5.mm.3D_glc_m_SumSquares | log.sigma.2.5.mm.3D_glc_m_ClusterProminence |
|--------------------------------------|--------------------------------------------|----------------------------------|--------------------------------------|---------------------------------------------|
| 5.106264878                          | 22.78571571                                | 0.005516761                      | 30.60608043                          | 32978.19628                                 |
| 4.233410952                          | 13.58394212                                | 0.021223512                      | 9.495418608                          | 3640.254032                                 |
| 4.494095929                          | 11.61123165                                | 0.014707734                      | 11.27362031                          | 4344.77155                                  |
| 4.908695084                          | 18.72104918                                | 0.007910767                      | 23.02093187                          | 14742.75062                                 |
| 4.673874954                          | 17.94785036                                | 0.010033761                      | 15.97920823                          | 8297.923345                                 |
| 4.862895152                          | 16.55327836                                | 0.008190244                      | 21.78416837                          | 13783.88145                                 |
| 4.657891563                          | 20.34385119                                | 0.010950772                      | 14.01445785                          | 7717.547093                                 |
| 4.609346228                          | 20.55819181                                | 0.012587377                      | 13.56543139                          | 7877.13093                                  |
| 4.815631764                          | 22.67209417                                | 0.007216889                      | 16.85944305                          | 9612.175697                                 |
| 4.694343749                          | 18.07101046                                | 0.009086362                      | 16.39879954                          | 10030.5017                                  |
| 4.414519259                          | 13.15817025                                | 0.011909196                      | 10.54613511                          | 3326.607856                                 |
| 4.814848973                          | 21.89169963                                | 0.008729559                      | 17.91132791                          | 12046.72833                                 |
| 4.207968752                          | 16.77116138                                | 0.035111256                      | 11.68947379                          | 7592.429477                                 |
| 4.88008376                           | 26.31174374                                | 0.009419527                      | 22.6710488                           | 27413.96284                                 |
| 4.842516371                          | 20.39273595                                | 0.008525071                      | 21.30138305                          | 17167.65944                                 |
| 4.665652743                          | 18.20159256                                | 0.012825188                      | 15.80730232                          | 9077.145181                                 |
| 4.691852272                          | 14.97946958                                | 0.007840188                      | 16.29780954                          | 7377.068184                                 |
| 4.314679401                          | 13.27957709                                | 0.021900979                      | 10.96158581                          | 4547.273878                                 |
| 4.235153699                          | 13.04469917                                | 0.015296139                      | 8.286769886                          | 1995.467349                                 |
| 4.755907799                          | 19.510144                                  | 0.009024737                      | 15.88265                             | 9205.244571                                 |
| 4.232450834                          | 15.07745413                                | 0.025504685                      | 8.773191255                          | 3517.477121                                 |
| 4.407838796                          | 13.4491731                                 | 0.011447445                      | 9.966312165                          | 2602.487327                                 |
| 4.475553605                          | 16.30395323                                | 0.013340728                      | 12.78674354                          | 5281.253153                                 |
| 4.537720544                          | 14.52581837                                | 0.010780041                      | 12.13485313                          | 4578.412993                                 |
| 4.607197195                          | 21.84691942                                | 0.01226586                       | 15.238045                            | 10430.61575                                 |
| 4.996438775                          | 20.85174817                                | 0.006266174                      | 22.69364034                          | 21955.43701                                 |
| 4.938009591                          | 20.53231577                                | 0.007821985                      | 21.81629898                          | 16678.45207                                 |
| 4.605292828                          | 20.05967571                                | 0.011285656                      | 14.72621215                          | 8670.225513                                 |
| 4.313543992                          | 13.26474198                                | 0.012507542                      | 9.774400043                          | 2522.336729                                 |
| 4.366658431                          | 17.32561443                                | 0.015308073                      | 10.25738988                          | 4056.974573                                 |
| 4.679273314                          | 22.45426477                                | 0.012805396                      | 15.19297265                          | 10349.32584                                 |
| 4.316346019                          | 17.28616189                                | 0.018881928                      | 12.49781139                          | 6824.754701                                 |
| 4.964955359                          | 19.8737857                                 | 0.006761526                      | 21.69690279                          | 14870.25609                                 |
| 4.788300201                          | 21.19712486                                | 0.00980874                       | 19.01975526                          | 14954.62813                                 |
| 4.734202374                          | 18.07093031                                | 0.008266349                      | 15.96471024                          | 8329.228661                                 |
| 4.471595145                          | 16.56869123                                | 0.01728274                       | 13.24681537                          | 7326.011731                                 |
| 4.463988695                          | 24.61934495                                | 0.018179704                      | 14.83374412                          | 11407.53799                                 |
| 4.681391487                          | 20.86298759                                | 0.022288797                      | 17.49336122                          | 14212.77847                                 |
| 4.06202859                           | 14.72658528                                | 0.015884246                      | 7.682671206                          | 1960.899614                                 |
| 4.933073276                          | 15.98327085                                | 0.005641084                      | 19.49184304                          | 9395.403877                                 |
| 4.53956761                           | 16.5797698                                 | 0.014735146                      | 15.59845608                          | 10208.15966                                 |
| 5.077123945                          | 16.04492632                                | 0.004085141                      | 25.89784062                          | 16555.30509                                 |
| 4.777186356                          | 18.95408986                                | 0.00762586                       | 17.35439265                          | 9054.375626                                 |
| 4.818319497                          | 23.94114795                                | 0.008294519                      | 20.34181212                          | 14918.70585                                 |
| 4.59813342                           | 16.28711743                                | 0.011948261                      | 14.43041458                          | 6815.006104                                 |
| 4.720326614                          | 19.94648642                                | 0.009387786                      | 16.39978768                          | 10345.59843                                 |
| 4.62947809                           | 19.51375084                                | 0.011164383                      | 14.6198708                           | 8877.201086                                 |
| 4.180371209                          | 12.33516139                                | 0.01924916                       | 7.891599604                          | 2334.201989                                 |
| 4.788702327                          | 15.41023684                                | 0.008073704                      | 19.00833623                          | 9441.772301                                 |
| 4.425818431                          | 12.72070932                                | 0.017818678                      | 11.91597258                          | 5118.622542                                 |
| 4.870928217                          | 22.1782997                                 | 0.007014632                      | 18.85581981                          | 13418.14652                                 |
| 4.935682436                          | 17.54141534                                | 0.005337805                      | 21.68648001                          | 13490.27877                                 |
| 4.613095412                          | 14.14800258                                | 0.009423298                      | 13.72354082                          | 5721.936082                                 |
| 4.536760384                          | 13.25366819                                | 0.010628493                      | 12.90583339                          | 5047.139858                                 |
| 4.705254804                          | 18.13699762                                | 0.007836327                      | 16.00579521                          | 6278.789866                                 |
| 4.576583815                          | 22.07183411                                | 0.011690533                      | 13.1485195                           | 7015.948117                                 |
| 4.791506092                          | 18.79140168                                | 0.007138233                      | 17.70908549                          | 9168.267469                                 |
| 4.614471331                          | 20.66861598                                | 0.012509866                      | 15.45549375                          | 11473.33538                                 |
| 4.574221086                          | 16.94345749                                | 0.010231594                      | 15.02998509                          | 7006.66691                                  |
| 4.858164989                          | 21.67905193                                | 0.007588598                      | 18.4962174                           | 11426.57788                                 |
| 4.44411534                           | 17.26690194                                | 0.020029473                      | 13.64262726                          | 8081.860875                                 |
| 4.601345733                          | 19.69464757                                | 0.011104727                      | 14.2984141                           | 7512.203643                                 |
| 4.738983601                          | 19.87955666                                | 0.009366114                      | 16.67804343                          | 10301.36338                                 |
| 4.746023035                          | 22.81792814                                | 0.009254466                      | 15.88540255                          | 10278.61627                                 |
| 4.361639732                          | 10.56710141                                | 0.013847051                      | 9.545015756                          | 2647.582523                                 |
| 4.526598839                          | 21.71889192                                | 0.016075526                      | 13.65819503                          | 10257.74211                                 |
| 4.106900281                          | 20.45752225                                | 0.021074499                      | 9.125567169                          | 4712.791657                                 |
| 4.762099329                          | 20.72831267                                | 0.009772311                      | 17.03438638                          | 11875.24342                                 |
| 4.731101772                          | 20.58211715                                | 0.008788884                      | 15.21856857                          | 9586.588628                                 |
| 4.243337451                          | 17.16912307                                | 0.019027333                      | 8.829766294                          | 2779.680674                                 |
| 4.597721148                          | 17.11374056                                | 0.010571561                      | 14.78787387                          | 7585.822348                                 |
| 4.648768426                          | 19.73307614                                | 0.012854246                      | 14.65309869                          | 9725.418337                                 |
| 4.700973872                          | 23.35658557                                | 0.010722634                      | 17.05282742                          | 14303.16017                                 |
| 4.956212776                          | 18.59712767                                | 0.00615657                       | 25.3186877                           | 16263.90583                                 |
| 4.938473347                          | 15.86681907                                | 0.005224317                      | 21.32781164                          | 11496.26899                                 |
| 4.424459422                          | 19.94182569                                | 0.0138967                        | 14.47333421                          | 10380.37586                                 |
| 4.295664234                          | 15.51821926                                | 0.016953747                      | 8.989188452                          | 2955.398674                                 |
| 4.451050704                          | 14.20060002                                | 0.017845552                      | 12.65938354                          | 6686.290379                                 |
| 4.439205197                          | 16.14430947                                | 0.012775132                      | 11.34400723                          | 4143.197356                                 |
| 5.04004779                           | 23.26597027                                | 0.005720874                      | 26.74520913                          | 21625.84606                                 |
| 5.086152964                          | 22.80932909                                | 0.006073154                      | 30.18568656                          | 33071.29203                                 |
| 4.650983865                          | 15.30557568                                | 0.010937972                      | 17.7741627                           | 8951.915736                                 |
| 4.580447819                          | 19.54809739                                | 0.01271952                       | 14.46343214                          | 8331.170956                                 |
| 4.423578209                          | 13.96797126                                | 0.012353014                      | 9.930735062                          | 3269.308773                                 |
| 4.862295299                          | 18.31317799                                | 0.007154428                      | 19.92249513                          | 11890.16993                                 |
| 4.028139842                          | 15.75716906                                | 0.033107297                      | 6.502847443                          | 1906.015693                                 |
| 4.835751843                          | 19.3265597                                 | 0.008060699                      | 21.79830247                          | 15779.20934                                 |
| 4.661970174                          | 18.20800517                                | 0.011532089                      | 15.21319972                          | 7247.217997                                 |
| 4.50713506                           | 17.49380536                                | 0.012972176                      | 12.81670218                          | 6326.908337                                 |
| 4.422581336                          | 21.18245662                                | 0.01665352                       | 11.7718228                           | 7150.706218                                 |
| 3.995945926                          | 13.19210036                                | 0.037036877                      | 8.326630339                          | 2685.014475                                 |
| 4.884899187                          | 17.45205388                                | 0.005868594                      | 19.43569496                          | 9492.821518                                 |
| 4.788653367                          | 19.58678551                                | 0.007732902                      | 17.78458644                          | 11074.71635                                 |
| 4.640740063                          | 17.60162513                                | 0.011414194                      | 15.44498297                          | 8746.306437                                 |
| 4.675279481                          | 18.78993968                                | 0.007563248                      | 15.9286159                           | 6466.710638                                 |
| 4.855064383                          | 23.2182762                                 | 0.012213022                      | 20.59724858                          | 19125.72882                                 |
| 4.706650504                          | 15.74885757                                | 0.00930573                       | 14.9405974                           | 6758.445617                                 |
| 4.476670386                          | 20.94928272                                | 0.016362815                      | 15.25593775                          | 9735.031768                                 |
| 4.207851172                          | 14.37106757                                | 0.017661288                      | 8.732980795                          | 2704.728108                                 |
| 4.41819596                           | 16.61467123                                | 0.019128384                      | 11.77271041                          | 4471.446471                                 |

| log.sigma.2.5.mm.3D_glc_m_SumAverage | log.sigma.2.5.mm.3D_glc_m_lmc2 | log.sigma.2.5.mm.3D_glc_m_lmc1 | log.sigma.2.5.mm.3D_glc_m_DifferenceAverage | log.sigma.2.5.mm.3D_glc_m_Id |
|--------------------------------------|--------------------------------|--------------------------------|---------------------------------------------|------------------------------|
| 45.14815629                          | 0.764096843                    | -0.102061852                   | 4.629852204                                 | 0.329493339                  |
| 27.16788424                          | 0.785227917                    | -0.143485483                   | 2.234915565                                 | 0.464095194                  |
| 23.22246329                          | 0.767785445                    | -0.128705471                   | 2.359761851                                 | 0.453685645                  |
| 37.07851802                          | 0.83955563                     | -0.148220249                   | 3.707930337                                 | 0.363139876                  |
| 35.76244881                          | 0.703514266                    | -0.090106037                   | 3.134693977                                 | 0.390012895                  |
| 32.94255141                          | 0.879987775                    | -0.184488011                   | 3.515550278                                 | 0.357033886                  |
| 40.47953993                          | 0.678866977                    | -0.084155209                   | 2.879556295                                 | 0.405759459                  |
| 40.87388053                          | 0.686580506                    | -0.086762449                   | 2.829072725                                 | 0.414202193                  |
| 45.07080961                          | 0.667825634                    | -0.077290772                   | 3.37949404                                  | 0.377762749                  |
| 36.01580078                          | 0.802628175                    | -0.133902016                   | 3.048868504                                 | 0.381344718                  |
| 26.3163405                           | 0.682371671                    | -0.090241531                   | 2.643162313                                 | 0.409984768                  |
| 43.49828542                          | 0.735097548                    | -0.098235699                   | 3.386627132                                 | 0.377353975                  |
| 33.4763786                           | 0.797822329                    | -0.154489755                   | 2.124005211                                 | 0.502818705                  |
| 52.36998301                          | 0.816738848                    | -0.136735461                   | 3.519317264                                 | 0.380186753                  |
| 40.37604335                          | 0.7534833                      | -0.103985917                   | 3.944743975                                 | 0.358754288                  |
| 36.16199192                          | 0.70967127                     | -0.094377053                   | 2.93237995                                  | 0.413215991                  |
| 29.93788961                          | 0.74834112                     | -0.106507424                   | 3.284940737                                 | 0.371194235                  |
| 26.55629205                          | 0.781436514                    | -0.141184258                   | 2.276163456                                 | 0.465769977                  |
| 26.08402397                          | 0.698818461                    | -0.09992201                    | 2.301667686                                 | 0.438194915                  |
| 38.73530818                          | 0.690623262                    | -0.085748491                   | 3.093825107                                 | 0.385297226                  |
| 30.14902926                          | 0.748876336                    | -0.12737215                    | 1.957733719                                 | 0.498386662                  |
| 26.8983462                           | 0.706483887                    | -0.097244394                   | 2.596953357                                 | 0.405255769                  |
| 32.55311076                          | 0.786769287                    | -0.13278091                    | 2.705844958                                 | 0.416828522                  |
| 29.03299278                          | 0.698966549                    | -0.093050876                   | 2.678896991                                 | 0.414946249                  |
| 43.48122841                          | 0.798349048                    | -0.134734502                   | 3.03133058                                  | 0.40353391                   |
| 41.36571996                          | 0.784237704                    | -0.117221646                   | 3.681460691                                 | 0.351922357                  |
| 40.71061777                          | 0.751657514                    | -0.102472145                   | 3.654214746                                 | 0.368303538                  |
| 39.82971349                          | 0.691887937                    | -0.087110704                   | 3.107265015                                 | 0.395755808                  |
| 26.52948397                          | 0.781604793                    | -0.132957959                   | 2.594814823                                 | 0.397600094                  |
| 34.60853519                          | 0.701914777                    | -0.098944545                   | 2.433499879                                 | 0.436670172                  |
| 44.71137715                          | 0.713698483                    | -0.096317658                   | 2.9284753                                   | 0.417023969                  |
| 34.50937957                          | 0.698483913                    | -0.096225592                   | 2.724335268                                 | 0.437864132                  |
| 39.33865957                          | 0.729668453                    | -0.094672114                   | 3.66880586                                  | 0.366113648                  |
| 42.11034702                          | 0.763835249                    | -0.11116147                    | 3.351923999                                 | 0.392807654                  |
| 35.78154259                          | 0.673317556                    | -0.079941693                   | 3.237561974                                 | 0.374291821                  |
| 32.9944714                           | 0.741915058                    | -0.113503185                   | 2.551372561                                 | 0.440759911                  |
| 48.99499518                          | 0.736496884                    | -0.108335044                   | 2.829713638                                 | 0.438943963                  |
| 41.48982049                          | 0.799361999                    | -0.13751323                    | 2.799536365                                 | 0.466095631                  |
| 29.45317056                          | 0.583751839                    | -0.064851133                   | 2.477959174                                 | 0.425536265                  |
| 31.77846845                          | 0.650277724                    | -0.071974666                   | 3.335659154                                 | 0.364117019                  |
| 32.99802267                          | 0.720324927                    | -0.100074652                   | 2.921490709                                 | 0.418942233                  |
| 31.64377778                          | 0.659400349                    | -0.069343604                   | 4.248750494                                 | 0.313638651                  |
| 37.53691601                          | 0.670353152                    | -0.079149758                   | 3.325587991                                 | 0.371381189                  |
| 47.60668025                          | 0.720695229                    | -0.092689609                   | 3.725092136                                 | 0.364815985                  |
| 32.52587951                          | 0.77795206                     | -0.12644324                    | 2.809631289                                 | 0.403582057                  |
| 39.61450657                          | 0.731559657                    | -0.098847326                   | 3.214393057                                 | 0.383589077                  |
| 38.74220255                          | 0.686077174                    | -0.08556069                    | 3.009366186                                 | 0.398230954                  |
| 24.67032278                          | 0.758287123                    | -0.130466583                   | 2.140385782                                 | 0.454389262                  |
| 30.76814614                          | 0.834270453                    | -0.148181427                   | 3.475026151                                 | 0.364580209                  |
| 25.43175755                          | 0.812013145                    | -0.156984416                   | 2.26080029                                  | 0.453987065                  |
| 44.04124437                          | 0.725539553                    | -0.093375381                   | 3.545755077                                 | 0.357601722                  |
| 34.61544865                          | 0.655384586                    | -0.069501316                   | 4.050125122                                 | 0.32432095                   |
| 28.26472134                          | 0.621275104                    | -0.06815617                    | 2.964001164                                 | 0.38898701                   |
| 26.50733638                          | 0.761120287                    | -0.117226735                   | 2.84583978                                  | 0.395374848                  |
| 36.09602371                          | 0.760628976                    | -0.113025975                   | 3.108354278                                 | 0.375809915                  |
| 43.92921365                          | 0.733878129                    | -0.105283771                   | 2.91388427                                  | 0.405540095                  |
| 37.2899756                           | 0.639414403                    | -0.069037943                   | 3.453466907                                 | 0.360141627                  |
| 41.06629309                          | 0.710359212                    | -0.094326223                   | 3.017527812                                 | 0.4092975                    |
| 33.74242662                          | 0.707473757                    | -0.092386039                   | 3.193777864                                 | 0.384794919                  |
| 43.09211421                          | 0.664253702                    | -0.0748607                     | 3.466939613                                 | 0.387336426                  |
| 34.37670462                          | 0.782593301                    | -0.131431688                   | 2.629825766                                 | 0.447866096                  |
| 39.08547638                          | 0.677936597                    | -0.083667258                   | 3.055320325                                 | 0.392352733                  |
| 39.46007445                          | 0.667736344                    | -0.078080606                   | 3.223055663                                 | 0.384236391                  |
| 45.45996408                          | 0.687744136                    | -0.088443793                   | 2.980808019                                 | 0.398002901                  |
| 21.13420282                          | 0.766058982                    | -0.130070822                   | 2.400979555                                 | 0.427790595                  |
| 43.22738664                          | 0.721222187                    | -0.100850185                   | 2.785263665                                 | 0.433991051                  |
| 40.57129813                          | 0.695254962                    | -0.09712009                    | 2.585806603                                 | 0.443286391                  |
| 41.16391135                          | 0.680539142                    | -0.081940573                   | 3.220254859                                 | 0.393907688                  |
| 40.88076404                          | 0.667157321                    | -0.079260847                   | 3.10797178                                  | 0.391246521                  |
| 34.30369752                          | 0.67413089                     | -0.094312489                   | 2.217072115                                 | 0.461281141                  |
| 34.06258372                          | 0.768013266                    | -0.118924839                   | 2.974689892                                 | 0.394515946                  |
| 39.22962475                          | 0.74742841                     | -0.109312921                   | 2.746573718                                 | 0.420831754                  |
| 46.54414825                          | 0.765141172                    | -0.114733528                   | 3.114774837                                 | 0.402646369                  |
| 36.75385918                          | 0.698030447                    | -0.081786338                   | 4.291863011                                 | 0.330301202                  |
| 31.45226876                          | 0.676924785                    | -0.077100717                   | 3.78867117                                  | 0.340933209                  |
| 39.59239078                          | 0.739625335                    | -0.110597431                   | 2.994819733                                 | 0.40623607                   |
| 31.01666915                          | 0.701875684                    | -0.10334809                    | 2.192098034                                 | 0.453965109                  |
| 28.37352639                          | 0.818108527                    | -0.155165985                   | 2.473777252                                 | 0.442603507                  |
| 32.23161595                          | 0.701352764                    | -0.095593836                   | 2.670882832                                 | 0.411407165                  |
| 46.23047675                          | 0.76274944                     | -0.104288345                   | 4.094365266                                 | 0.336819571                  |
| 45.21236786                          | 0.786048196                    | -0.112446493                   | 4.447825122                                 | 0.338897413                  |
| 30.39149954                          | 0.757455402                    | -0.108773242                   | 3.429498966                                 | 0.392764044                  |
| 38.79537696                          | 0.726566727                    | -0.103342268                   | 2.952461899                                 | 0.417276205                  |
| 27.93594252                          | 0.65339178                     | -0.085130481                   | 2.389627326                                 | 0.428707206                  |
| 36.21820185                          | 0.711672238                    | -0.09111711                    | 3.596772696                                 | 0.358861444                  |
| 31.51433813                          | 0.769583866                    | -0.147622806                   | 1.651081022                                 | 0.523327662                  |
| 38.23428619                          | 0.730006054                    | -0.095509198                   | 3.797249056                                 | 0.371111226                  |
| 36.21515514                          | 0.744500837                    | -0.108344065                   | 2.796786002                                 | 0.413263574                  |
| 34.90003418                          | 0.761309268                    | -0.121044223                   | 2.629608721                                 | 0.422693206                  |
| 42.10202727                          | 0.749871126                    | -0.117231492                   | 2.55936789                                  | 0.438634952                  |
| 26.38420072                          | 0.772684734                    | -0.151922179                   | 1.836055611                                 | 0.508929779                  |
| 34.67137581                          | 0.698600808                    | -0.084166598                   | 3.513952315                                 | 0.348122945                  |
| 38.78929075                          | 0.630511581                    | -0.065855821                   | 3.546518015                                 | 0.364476485                  |
| 35.079431                            | 0.712962023                    | -0.097812848                   | 2.891153073                                 | 0.409945654                  |
| 37.20047052                          | 0.583157518                    | -0.056419176                   | 3.421955218                                 | 0.358138051                  |
| 46.17846206                          | 0.791974983                    | -0.126453037                   | 2.33665153                                  | 0.413155895                  |
| 31.42855875                          | 0.706632553                    | -0.092467558                   | 2.905626195                                 | 0.394261812                  |
| 41.6162998                           | 0.797807678                    | -0.136608436                   | 3.035311999                                 | 0.424427285                  |
| 28.74213514                          | 0.736231976                    | -0.118436842                   | 2.3161965                                   | 0.448936                     |
| 33.08279233                          | 0.683826513                    | -0.093246242                   | 2.422301993                                 | 0.454607299                  |

| log.sigma.2.5.mm.3D_glcm_ClusterTendency | log.sigma.2.5.mm.3D_firstorder_InterquartileRange | log.sigma.2.5.mm.3D_firstorder_Skewness | log.sigma.2.5.mm.3D_firstorder_Uniformity |
|------------------------------------------|---------------------------------------------------|-----------------------------------------|-------------------------------------------|
| 86.50622762                              | 139.7161674                                       | -1.037423398                            | 0.062691822                               |
| 27.71780127                              | 71.70474291                                       | 0.222949625                             | 0.116762847                               |
| 33.85693666                              | 100.6151563                                       | 0.089753795                             | 0.093492314                               |
| 63.83526871                              | 145.6444626                                       | -0.669390903                            | 0.068154032                               |
| 43.59787724                              | 100.3748705                                       | -0.623135217                            | 0.084749789                               |
| 62.87050028                              | 130.2043223                                       | 0.343866786                             | 0.071354454                               |
| 42.17192652                              | 104.4331316                                       | 0.088694543                             | 0.086103342                               |
| 41.17411069                              | 97.5773375                                        | -0.185019705                            | 0.091381217                               |
| 49.33445777                              | 121.7656912                                       | -0.534721149                            | 0.073759094                               |
| 46.91037206                              | 111.2407105                                       | -0.632286823                            | 0.078239864                               |
| 29.53574075                              | 93.73021364                                       | -0.348190859                            | 0.092981552                               |
| 53.2203012                               | 114.1557369                                       | -0.674816469                            | 0.078513276                               |
| 33.97964296                              | 58.42560339                                       | -0.292747587                            | 0.148178165                               |
| 65.61300713                              | 109.2682745                                       | -0.839946318                            | 0.079720456                               |
| 58.93967529                              | 106.0770164                                       | -0.734793548                            | 0.077770856                               |
| 44.32356045                              | 98.67883539                                       | -0.243733304                            | 0.088541789                               |
| 44.60457777                              | 122.5975189                                       | -0.556209961                            | 0.076131635                               |
| 32.80785757                              | 67.32895947                                       | 0.375796449                             | 0.120350144                               |
| 23.37036829                              | 82.45935899                                       | 0.194839818                             | 0.107036783                               |
| 47.87498777                              | 112.382609                                        | -0.158658264                            | 0.077466441                               |
| 26.66347028                              | 71.11539912                                       | 0.090607236                             | 0.122560521                               |
| 28.28149282                              | 97.735834                                         | -0.159095376                            | 0.09247484                                |
| 35.57674819                              | 91.18834347                                       | -0.21114055                             | 0.094091415                               |
| 34.50887625                              | 105.2944596                                       | 0.005044654                             | 0.086695718                               |
| 44.1599282                               | 99.80226517                                       | -0.568746288                            | 0.090088483                               |
| 68.6581432                               | 139.1273973                                       | -0.233277807                            | 0.065297663                               |
| 63.07515465                              | 119.6805656                                       | -0.21618553                             | 0.071700754                               |
| 41.2761037                               | 95.53653729                                       | -0.651360904                            | 0.090346069                               |
| 27.97437054                              | 95.02318636                                       | 0.259035977                             | 0.096897537                               |
| 28.54521701                              | 77.63643026                                       | -0.634137316                            | 0.109556104                               |
| 45.70067198                              | 99.04257548                                       | -0.394416229                            | 0.090733052                               |
| 32.55888885                              | 67.27470684                                       | -1.091995644                            | 0.117339183                               |
| 62.62989563                              | 128.1288776                                       | -0.418289755                            | 0.067151102                               |
| 55.17906623                              | 112.6984912                                       | -0.836859419                            | 0.078205885                               |
| 45.52282757                              | 122.7843704                                       | -0.254924198                            | 0.073772316                               |
| 37.71348758                              | 93.43847346                                       | -0.218672464                            | 0.101645864                               |
| 40.59343284                              | 72.83915186                                       | -0.712769222                            | 0.111080504                               |
| 53.07521928                              | 88.25277376                                       | -0.294589592                            | 0.103360834                               |
| 19.10460155                              | 85.33614802                                       | 0.1033582411                            | 0.115912486                               |
| 55.7564326                               | 142.8773966                                       | -0.001662662                            | 0.065247848                               |
| 42.52289777                              | 78.97894597                                       | -0.885554634                            | 0.102627854                               |
| 70.28332481                              | 163.153471                                        | 0.143102986                             | 0.057424292                               |
| 47.40897608                              | 121.7754693                                       | -0.431319556                            | 0.073521503                               |
| 56.55198413                              | 107.33476                                         | -0.761220016                            | 0.079126754                               |
| 41.94558316                              | 99.6914854                                        | -0.040944264                            | 0.088001842                               |
| 47.47554004                              | 114.44098                                         | -0.221679963                            | 0.077450971                               |
| 42.70529083                              | 101.6915562                                       | -0.139854068                            | 0.085703218                               |
| 23.18006816                              | 71.34725761                                       | 0.075848562                             | 0.118304969                               |
| 51.93840059                              | 118.3269405                                       | -0.533397873                            | 0.074494512                               |
| 37.2644102                               | 113.8276246                                       | 0.382046251                             | 0.098557692                               |
| 55.60967527                              | 128.2257061                                       | -0.677412267                            | 0.071364857                               |
| 58.8719107                               | 139.7434464                                       | -0.143467251                            | 0.063898798                               |
| 38.13099221                              | 102.126685                                        | -0.215358315                            | 0.084852431                               |
| 36.76913962                              | 110.7742414                                       | 0.345621916                             | 0.084626392                               |
| 44.75605424                              | 130.5121017                                       | 0.054816539                             | 0.0739974                                 |
| 38.73035881                              | 91.8741076                                        | -0.694415112                            | 0.092002104                               |
| 48.67905257                              | 124.872243                                        | -0.456606459                            | 0.07106327                                |
| 45.18962746                              | 88.96515882                                       | -0.947130146                            | 0.094062402                               |
| 38.4930307                               | 95.2437768                                        | -0.663753309                            | 0.089153372                               |
| 53.08784918                              | 127.0349083                                       | -0.458481842                            | 0.072923495                               |
| 38.42408349                              | 73.89975893                                       | 0.349338384                             | 0.109070411                               |
| 39.89996581                              | 106.0909027                                       | -0.5836776                              | 0.086748306                               |
| 48.13562583                              | 115.9581947                                       | -0.313067226                            | 0.078576452                               |
| 48.15770984                              | 106.1573868                                       | -0.005334273                            | 0.081326665                               |
| 27.7883789                               | 99.64272761                                       | 0.00785041                              | 0.093690114                               |
| 40.1752498                               | 84.42494017                                       | -0.529403459                            | 0.102426651                               |
| 23.45006881                              | 63.65621471                                       | -1.262308552                            | 0.128517963                               |
| 49.58017799                              | 101.9202514                                       | -0.294059585                            | 0.083591168                               |
| 45.41715795                              | 112.1290578                                       | -0.58978845                             | 0.078022504                               |
| 24.6120539                               | 75.8259629                                        | -0.38273815                             | 0.114973273                               |
| 40.45609147                              | 100.4673319                                       | -0.506269487                            | 0.085952894                               |
| 45.08974711                              | 102.8515551                                       | -0.332240961                            | 0.089368239                               |
| 49.52034809                              | 104.0845246                                       | -0.815851188                            | 0.084011236                               |
| 66.55037384                              | 140.1269207                                       | -0.636811654                            | 0.063863576                               |
| 57.84310903                              | 147.5119991                                       | 0.066935666                             | 0.062384062                               |
| 38.70280002                              | 87.30278599                                       | -1.414766354                            | 0.100410669                               |
| 26.18860352                              | 82.47312403                                       | 0.112632863                             | 0.105743504                               |
| 37.26181041                              | 79.54119015                                       | -0.045039096                            | 0.107528733                               |
| 31.13871419                              | 90.96906053                                       | -0.304686549                            | 0.096339584                               |
| 77.51790394                              | 145.2887535                                       | -0.74119502                             | 0.065102567                               |
| 86.77707248                              | 134.2125454                                       | -1.017494394                            | 0.064145409                               |
| 44.52804778                              | 101.3440638                                       | -0.254768491                            | 0.084344616                               |
| 40.07901869                              | 106.6801013                                       | -0.233281496                            | 0.087281068                               |
| 29.31358128                              | 92.40460944                                       | -0.502581998                            | 0.096373323                               |
| 55.11922604                              | 128.2114525                                       | -0.42084888                             | 0.069217736                               |
| 20.46437842                              | 54.89583313                                       | 0.000341919                             | 0.148272877                               |
| 59.73349672                              | 121.224102                                        | -0.798622388                            | 0.075427572                               |
| 43.66122378                              | 114.1409287                                       | -0.20209269                             | 0.083267762                               |
| 36.33210894                              | 93.76502514                                       | -0.696635201                            | 0.094730732                               |
| 34.53524284                              | 84.12756538                                       | -0.851890587                            | 0.101980796                               |
| 26.2442789                               | 64.50943351                                       | 0.89956396                              | 0.14581373                                |
| 54.08798287                              | 134.9692848                                       | -0.10115552                             | 0.067784835                               |
| 49.99684336                              | 111.8206987                                       | -0.669497309                            | 0.077179066                               |
| 43.23693521                              | 98.31574273                                       | -0.653145801                            | 0.087600184                               |
| 41.62452677                              | 124.1600614                                       | -0.559451112                            | 0.075754977                               |
| 61.87211025                              | 105.8243942                                       | -0.754351443                            | 0.083950551                               |
| 43.22444722                              | 108.8071251                                       | -0.159022661                            | 0.080960984                               |
| 42.83593961                              | 75.77783775                                       | -1.277686565                            | 0.110970627                               |
| 24.21330666                              | 82.06316853                                       | -0.932523395                            | 0.11417916                                |
| 33.15696688                              | 85.36366141                                       | 0.253375503                             | 0.108325498                               |



| log.sigma.2.5.mm.3D_firstorder_MeanAbsoluteDeviation | log.sigma.2.5.mm.3D_firstorder_Energy | log.sigma.2.5.mm.3D_firstorder_RobustMeanAbsoluteDeviation | log.sigma.2.5.mm.3D_firstorder_Median |
|------------------------------------------------------|---------------------------------------|------------------------------------------------------------|---------------------------------------|
| 102.3515208                                          | 43728070.16                           | 62.34144095                                                | 48.28226471                           |
| 56.13199186                                          | 8636729.063                           | 32.07217681                                                | 46.15458679                           |
| 66.04351357                                          | 16547357.41                           | 42.39947155                                                | 47.54277039                           |
| 93.83990362                                          | 15086013.53                           | 61.55529541                                                | 43.46133804                           |
| 72.25894754                                          | 26380406.78                           | 44.31112814                                                | 41.78599167                           |
| 88.62542606                                          | 11316969.13                           | 56.03200656                                                | 45.16466522                           |
| 72.41336879                                          | 67732667.89                           | 45.88632777                                                | 40.14797592                           |
| 71.09007499                                          | 66223895.76                           | 42.63061133                                                | 48.47934914                           |
| 79.37048354                                          | 64239556.82                           | 51.83242016                                                | 61.47342491                           |
| 76.31954923                                          | 15739766.8                            | 48.8734309                                                 | 67.72161484                           |
| 62.41157984                                          | 12779069.44                           | 40.64707598                                                | 42.26807022                           |
| 79.44247809                                          | 37698279.88                           | 49.26829619                                                | 62.33815765                           |
| 54.11459467                                          | 15295161.2                            | 26.86890317                                                | 24.01608658                           |
| 83.03410292                                          | 28302452.85                           | 47.92229131                                                | 44.78622437                           |
| 83.99216254                                          | 32337775.37                           | 48.95880612                                                | 56.68537712                           |
| 73.2493854                                           | 52862522.17                           | 44.6397107                                                 | 35.2675724                            |
| 77.94977352                                          | 13795623.03                           | 51.8002224                                                 | 50.90634537                           |
| 58.33524775                                          | 11004046.79                           | 32.71418758                                                | 34.74972153                           |
| 55.02329283                                          | 8832131.582                           | 35.70019075                                                | 34.35497284                           |
| 78.27445431                                          | 74565190.99                           | 49.03872477                                                | 51.6880188                            |
| 54.8246152                                           | 23326089.96                           | 32.41378397                                                | 33.71543121                           |
| 62.07427627                                          | 9757783.017                           | 41.54546414                                                | 51.23950195                           |
| 66.00169951                                          | 10418841.31                           | 40.47474504                                                | 39.53241348                           |
| 67.51315839                                          | 27242443.33                           | 44.44581341                                                | 45.60248947                           |
| 72.69822593                                          | 18212137.87                           | 44.48706009                                                | 53.08450699                           |
| 92.5349161                                           | 48081966.4                            | 58.02030825                                                | 66.29187775                           |
| 87.57989568                                          | 55178766.4                            | 53.52037109                                                | 49.63311005                           |
| 69.74060423                                          | 31005371.04                           | 41.35185742                                                | 40.62771225                           |
| 62.21505298                                          | 3864308.506                           | 42.48638642                                                | 36.6873436                            |
| 56.57808888                                          | 17616190                              | 33.95015075                                                | 51.97973251                           |
| 71.04386025                                          | 60548801.59                           | 42.99940965                                                | 45.6414299                            |
| 59.18521614                                          | 16565869.3                            | 31.6269265                                                 | 28.35523796                           |
| 90.1113465                                           | 50060609.24                           | 57.48165499                                                | 43.98698044                           |
| 80.7700442                                           | 34276896.62                           | 49.50354858                                                | 47.64193344                           |
| 80.04265098                                          | 69012575.52                           | 52.79434486                                                | 65.77647018                           |
| 66.39048671                                          | 33339898.14                           | 40.44216127                                                | 40.47684097                           |
| 63.06324931                                          | 37648092.47                           | 32.68507356                                                | 27.57959175                           |
| 74.60848624                                          | 66301633.17                           | 42.5277957                                                 | 25.09867287                           |
| 52.39192822                                          | 7004342.507                           | 35.08532546                                                | 41.14739037                           |
| 86.55686036                                          | 95913457.95                           | 59.48504535                                                | 34.8949852                            |
| 67.56552925                                          | 26240359.2                            | 37.01339263                                                | 33.26490402                           |
| 98.69129014                                          | 64641262.28                           | 67.58566886                                                | 33.88993073                           |
| 79.99024551                                          | 52285876.92                           | 52.55090314                                                | 55.10607529                           |
| 80.95337678                                          | 34687209.19                           | 48.49102244                                                | 50.65154266                           |
| 72.0411523                                           | 19234348.44                           | 44.78757039                                                | 65.09188461                           |
| 78.20619037                                          | 40970458.48                           | 49.44587388                                                | 58.85808563                           |
| 73.31078321                                          | 59531623.45                           | 44.68469433                                                | 46.0112896                            |
| 52.39649992                                          | 6808461.06                            | 31.14768737                                                | 47.67842484                           |
| 80.67436291                                          | 12305145.71                           | 50.60052058                                                | 61.32702255                           |
| 69.4446906                                           | 15740431.36                           | 47.12738702                                                | 41.57457161                           |
| 84.67169604                                          | 46248875.93                           | 54.46008045                                                | 71.06140137                           |
| 91.03232254                                          | 55350280.14                           | 59.84178686                                                | 52.47187424                           |
| 69.70707134                                          | 47322708.62                           | 44.14013942                                                | 43.72288895                           |
| 71.21518915                                          | 14882235.32                           | 47.28955685                                                | 58.61055756                           |
| 77.78536062                                          | 18354894.01                           | 53.3470027                                                 | 54.1082325                            |
| 67.52683486                                          | 21254672.48                           | 40.61651396                                                | 46.05484962                           |
| 82.31215438                                          | 60051756.55                           | 53.5724868                                                 | 59.76319885                           |
| 69.65416275                                          | 38199503.6                            | 39.36411935                                                | 36.12022781                           |
| 69.87367535                                          | 17499179.03                           | 41.33157261                                                | 38.43456078                           |
| 82.38669799                                          | 114144291.1                           | 54.54614559                                                | 25.85389328                           |
| 66.03734983                                          | 20010209.22                           | 35.99279471                                                | 35.55097771                           |
| 71.54637862                                          | 33248450.22                           | 45.6564474                                                 | 49.71209717                           |
| 78.51250209                                          | 85502572.3                            | 50.60818817                                                | 54.07439804                           |
| 75.08567319                                          | 91941235.63                           | 46.06886738                                                | 36.10784912                           |
| 63.33698916                                          | 7756175.428                           | 42.37392094                                                | 49.5347538                            |
| 65.6368586                                           | 40361263.14                           | 37.2421381                                                 | 30.91582966                           |
| 51.74766787                                          | 8565072.746                           | 28.04876454                                                | 26.2734251                            |
| 75.44963062                                          | 75934387.46                           | 44.47230278                                                | 36.96652222                           |
| 76.82924553                                          | 76352922.8                            | 48.63126504                                                | 55.60459518                           |
| 54.53573717                                          | 21914755.78                           | 33.3530346                                                 | 38.02120018                           |
| 70.22498436                                          | 13415231.12                           | 44.34051735                                                | 39.76203537                           |
| 73.00791581                                          | 59924861.27                           | 44.86231957                                                | 51.83843231                           |
| 75.91115721                                          | 31566187.17                           | 45.47451022                                                | 50.21728897                           |
| 98.20555475                                          | 38375038.71                           | 63.372509                                                  | 40.67620087                           |
| 91.00684075                                          | 45433715.31                           | 62.11698413                                                | 29.74857521                           |
| 66.9736404                                           | 13717751.47                           | 38.82197258                                                | 50.84355545                           |
| 57.31516608                                          | 20893273.42                           | 35.77756337                                                | 47.54950905                           |
| 63.08974229                                          | 9676487.986                           | 36.47303268                                                | 36.77176666                           |
| 62.62402557                                          | 15736275.24                           | 38.80168466                                                | 42.56177902                           |
| 96.42006918                                          | 38401042.5                            | 62.44556198                                                | 40.97473526                           |
| 101.171656                                           | 40511395.45                           | 61.09869458                                                | 48.25589371                           |
| 76.97204368                                          | 20888115.29                           | 46.08139638                                                | 29.15288162                           |
| 72.0392066                                           | 38902382.59                           | 45.06523003                                                | 39.79319763                           |
| 60.6177902                                           | 23731543.14                           | 39.81884043                                                | 44.92855835                           |
| 85.81161929                                          | 35314816.3                            | 55.63397606                                                | 48.04896164                           |
| 45.30395534                                          | 8135027.113                           | 25.85407864                                                | 26.93464661                           |
| 87.0292636                                           | 34252851.79                           | 52.45593296                                                | 34.32313156                           |
| 75.5005076                                           | 40148318.01                           | 49.35426355                                                | 58.28509903                           |
| 64.90365759                                          | 15980289.68                           | 39.84394896                                                | 52.55295753                           |
| 63.34888056                                          | 20832992.5                            | 36.66413776                                                | 43.32660294                           |
| 55.6449051                                           | 10114225.73                           | 32.91748235                                                | 27.16533279                           |
| 84.6999281                                           | 39118031.94                           | 57.32432917                                                | 64.22073746                           |
| 80.00495749                                          | 66189102.01                           | 49.11541587                                                | 39.48067856                           |
| 70.67382539                                          | 40997333.86                           | 43.13769487                                                | 52.65520287                           |
| 78.44078532                                          | 47506792.46                           | 52.38560273                                                | 39.73142624                           |
| 80.66582318                                          | 52818205.91                           | 46.92212396                                                | 42.48080254                           |
| 73.47477741                                          | 29538335.93                           | 47.04698786                                                | 39.21905899                           |
| 67.14740865                                          | 10232030.35                           | 35.2288429                                                 | 24.74102211                           |
| 54.49633632                                          | 5038892.565                           | 33.74084222                                                | 33.99078178                           |
| 63.45315394                                          | 59078013.06                           | 38.80547522                                                | 37.42430878                           |

| log.sigma.2.5.mm.3D_firstorder_TotalEnergy | log.sigma.2.5.mm.3D_firstorder_Maximum | log.sigma.2.5.mm.3D_firstorder_RootMeanSquared | log.sigma.2.5.mm.3D_firstorder_90Percentile | log.sigma.2.5.mm.3D_firstorder_Minimum |
|--------------------------------------------|----------------------------------------|------------------------------------------------|---------------------------------------------|----------------------------------------|
| 1180657894                                 | 373.5844421                            | 143.5514111                                    | 185.021965                                  | -516.0214233                           |
| 233191684.7                                | 338.7020569                            | 96.1100587                                     | 153.4232605                                 | -273.8578491                           |
| 446778650.1                                | 359.1340637                            | 103.8607953                                    | 175.9214066                                 | -221.5218964                           |
| 407322365.4                                | 347.5782471                            | 124.262465                                     | 159.3542999                                 | -410.8236694                           |
| 712270983                                  | 309.794342                             | 105.5479724                                    | 156.8385208                                 | -393.8573914                           |
| 305558166.6                                | 425.1471252                            | 130.9462597                                    | 220.9885468                                 | -331.400238                            |
| 1828782033                                 | 506.8499451                            | 109.4804156                                    | 177.705307                                  | -440.951355                            |
| 1788045186                                 | 451.6871643                            | 113.8628155                                    | 182.0884628                                 | -433.0189514                           |
| 1734468034                                 | 422.4206238                            | 118.8739113                                    | 181.476799                                  | -487.5892639                           |
| 424973703.6                                | 315.4377441                            | 121.1718543                                    | 198.0696259                                 | -366.5860291                           |
| 345034875                                  | 319.4610596                            | 92.05533109                                    | 147.2476578                                 | -260.9544067                           |
| 1017853557                                 | 371.7673645                            | 127.8866768                                    | 203.1191925                                 | -453.9032288                           |
| 412969352.4                                | 321.2275696                            | 90.51173091                                    | 125.5483307                                 | -358.9414368                           |
| 764166227                                  | 379.3240356                            | 128.3887262                                    | 180.5112946                                 | -590.2734985                           |
| 873119935                                  | 509.6199341                            | 127.6686412                                    | 174.3744293                                 | -439.2289734                           |
| 1427288099                                 | 411.3769226                            | 109.909513                                     | 178.4764481                                 | -389.7349548                           |
| 372481821.8                                | 335.1217346                            | 107.4901072                                    | 157.4580414                                 | -301.5023499                           |
| 297109263.3                                | 356.7386475                            | 94.47016543                                    | 166.8420898                                 | -259.4111633                           |
| 238467552.7                                | 362.1419983                            | 82.4888823                                     | 136.9426559                                 | -254.4466705                           |
| 2013260157                                 | 459.5774231                            | 159.7589994                                    | 195.1922546                                 | -420.81427                             |
| 629804428.9                                | 337.193634                             | 87.82741079                                    | 146.5268967                                 | -320.8718567                           |
| 263460141.5                                | 273.2526245                            | 95.09657068                                    | 156.4896667                                 | -270.7527771                           |
| 281308715.3                                | 341.4963379                            | 100.8694687                                    | 164.5035507                                 | -336.3103638                           |
| 73545969.9                                 | 369.2081604                            | 101.4485998                                    | 164.8764832                                 | -285.6412354                           |
| 491727722.5                                | 429.0148315                            | 119.6096619                                    | 187.5628601                                 | -452.1858826                           |
| 1298213093                                 | 514.5396729                            | 142.4651304                                    | 216.8351532                                 | -432.1140137                           |
| 1489826693                                 | 515.2955322                            | 130.6420965                                    | 200.182705                                  | -428.7444763                           |
| 837145018.1                                | 380.848999                             | 105.9513828                                    | 157.6104721                                 | -448.9613647                           |
| 104336329.7                                | 270.5462952                            | 92.97841401                                    | 163.3085144                                 | -250.9556274                           |
| 475637130.1                                | 312.5007629                            | 92.60954986                                    | 139.4185699                                 | -368.5004272                           |
| 1634817643                                 | 426.7869873                            | 112.8081708                                    | 175.8030533                                 | -485.2089844                           |
| 447278471                                  | 298.5300293                            | 89.48018429                                    | 106.8348511                                 | -386.0875549                           |
| 1351636450                                 | 421.553894                             | 124.5128124                                    | 177.4511108                                 | -442.9216919                           |
| 925476208.7                                | 358.4846497                            | 120.7721551                                    | 178.4738464                                 | -453.9718628                           |
| 186339539                                  | 564.5778809                            | 125.1815897                                    | 199.7211563                                 | -362.4199524                           |
| 900177249.8                                | 403.1270447                            | 105.437209                                     | 173.359259                                  | -347.883606                            |
| 1016498497                                 | 538.9558716                            | 100.5869531                                    | 124.3405151                                 | -563.3544312                           |
| 1790144096                                 | 470.3956299                            | 113.3431253                                    | 177.5363464                                 | -462.1835632                           |
| 189117247.7                                | 232.5752869                            | 75.46249005                                    | 104.5933784                                 | -323.6138                              |
| 2589663365                                 | 423.0977783                            | 114.8609936                                    | 175.7435547                                 | -348.1533203                           |
| 708489698.5                                | 379.9340515                            | 100.5772836                                    | 123.2003319                                 | -372.8882141                           |
| 1745314082                                 | 502.155365                             | 129.2908612                                    | 186.3298065                                 | -334.1978455                           |
| 1411718677                                 | 370.8486328                            | 119.637509                                     | 190.6307526                                 | -395.9202271                           |
| 936554648.1                                | 486.1633301                            | 118.075418                                     | 154.6328934                                 | -534.0371704                           |
| 519327407.8                                | 397.5338745                            | 122.6798716                                    | 209.6029953                                 | -324.0115967                           |
| 1106202379                                 | 458.0420227                            | 122.1699054                                    | 192.1622375                                 | -402.4703369                           |
| 1607353833                                 | 471.0814819                            | 114.2342205                                    | 179.0895279                                 | -414.568634                            |
| 183828448.6                                | 290.4873047                            | 88.41285227                                    | 137.6219025                                 | -240.6110535                           |
| 332238934.1                                | 339.6279907                            | 120.2482045                                    | 179.3122253                                 | -317.7467651                           |
| 424991646.8                                | 412.2767334                            | 107.8996334                                    | 188.3786713                                 | -245.9372406                           |
| 1248719650                                 | 390.9613953                            | 134.174053                                     | 211.8154449                                 | -462.7088013                           |
| 1494457564                                 | 558.687561                             | 128.1387654                                    | 189.0104828                                 | -356.917572                            |
| 1277713133                                 | 401.4483948                            | 102.4118595                                    | 158.0839142                                 | -298.4493103                           |
| 401820353.6                                | 373.3904724                            | 116.1046322                                    | 190.2720886                                 | -230.9395752                           |
| 495582138.2                                | 349.3935242                            | 117.4762622                                    | 196.5751953                                 | -355.6855774                           |
| 573876157.1                                | 382.2213745                            | 104.4022607                                    | 154.8747314                                 | -490.5853271                           |
| 1621397427                                 | 394.1190796                            | 121.8438448                                    | 189.8855042                                 | -384.8700562                           |
| 1031386597                                 | 433.4786072                            | 105.1033032                                    | 138.2710464                                 | -460.2807007                           |
| 472477833.9                                | 359.2970276                            | 103.0457854                                    | 143.4059418                                 | -373.1654358                           |
| 3081895861                                 | 438.0702209                            | 111.8189717                                    | 163.6988556                                 | -476.817749                            |
| 540275649.1                                | 461.2628479                            | 106.4462742                                    | 176.2885513                                 | -350.7471924                           |
| 897708155.8                                | 377.0643616                            | 111.5912321                                    | 180.4086517                                 | -412.1698608                           |
| 2308569452                                 | 411.3517761                            | 121.5312082                                    | 198.520105                                  | -521.5983887                           |
| 2482413362                                 | 427.3353882                            | 109.8227231                                    | 177.7627747                                 | -414.460083                            |
| 209416736.6                                | 333.2313538                            | 99.08553669                                    | 162.6463242                                 | -189.6196747                           |
| 1089754105                                 | 415.3847046                            | 102.2295008                                    | 146.4589722                                 | -485.4915771                           |
| 231256964.1                                | 343.3833923                            | 81.04509437                                    | 100.1012901                                 | -450.6020813                           |
| 2050228461                                 | 490.9254456                            | 110.2247794                                    | 149.2539886                                 | -488.7935791                           |
| 2061528916                                 | 548.4414063                            | 114.1761044                                    | 164.6435333                                 | -440.7539063                           |
| 591698406.1                                | 286.9292297                            | 86.9599191                                     | 140.6773392                                 | -363.3673096                           |
| 362211240.2                                | 361.3929749                            | 101.6235832                                    | 151.5356842                                 | -361.4795837                           |
| 1617971254                                 | 508.0858765                            | 118.188405                                     | 191.766095                                  | -417.237915                            |
| 852287053.6                                | 433.015686                             | 117.6898207                                    | 168.0360992                                 | -501.4733887                           |
| 1036126045                                 | 364.5708008                            | 130.336573                                     | 169.8890381                                 | -420.3433838                           |
| 1226710314                                 | 489.429657                             | 120.461313                                     | 182.0255127                                 | -330.7688599                           |
| 370379289.8                                | 277.8071899                            | 101.1032712                                    | 131.5407333                                 | -434.9671021                           |
| 564118382.3                                | 349.7685852                            | 93.38128309                                    | 151.5682068                                 | -317.4500122                           |
| 261265175.6                                | 361.4955139                            | 100.5023291                                    | 155.5025497                                 | -288.986969                            |
| 424879431.4                                | 371.4830017                            | 96.01392217                                    | 151.9369934                                 | -348.2633972                           |
| 1036828148                                 | 462.7065735                            | 128.1316434                                    | 158.0060242                                 | -525.7952271                           |
| 1093807677                                 | 373.5844421                            | 142.7155219                                    | 184.8744049                                 | -515.8444824                           |
| 563979112.9                                | 455.4678345                            | 107.7541601                                    | 130.3202972                                 | -370.7885437                           |
| 1050364330                                 | 414.5370483                            | 109.0889195                                    | 171.1745728                                 | -403.2492981                           |
| 640751664.9                                | 267.9807739                            | 87.87831265                                    | 133.0978943                                 | -286.21521                             |
| 953500040                                  | 422.8328247                            | 120.3296284                                    | 178.8508789                                 | -383.0986633                           |
| 219645732.1                                | 239.7555542                            | 72.87022655                                    | 122.4828484                                 | -333.9161682                           |
| 924826998.5                                | 381.0682373                            | 119.8406556                                    | 147.1265076                                 | -448.8538818                           |
| 1084004586                                 | 361.2105103                            | 121.0040629                                    | 204.0735992                                 | -360.1446228                           |
| 431467821.3                                | 347.896759                             | 104.4772627                                    | 163.8046585                                 | -359.3144226                           |
| 562490797.4                                | 320.5814209                            | 101.4292735                                    | 148.163559                                  | -455.8621826                           |
| 273084094.6                                | 307.0581055                            | 88.06990446                                    | 169.6888687                                 | -266.7584839                           |
| 1056186862                                 | 381.5383911                            | 128.1497077                                    | 210.6472183                                 | -340.9394836                           |
| 1787105754                                 | 468.6484375                            | 113.0062959                                    | 152.153009                                  | -431.9480286                           |
| 1106928014                                 | 333.2362976                            | 111.4604616                                    | 175.5150513                                 | -358.8439636                           |
| 1282683396                                 | 331.2208557                            | 104.4800595                                    | 142.4363632                                 | -404.8965454                           |
| 1426091560                                 | 448.889801                             | 124.2372473                                    | 190.0847198                                 | -523.1585083                           |
| 797535070                                  | 384.0314636                            | 102.3999133                                    | 150.6077759                                 | -334.6769104                           |
| 276264819.5                                | 338.9741211                            | 98.85703236                                    | 105.2576706                                 | -488.1948547                           |
| 136050099.2                                | 212.2168732                            | 77.72925837                                    | 100.7891731                                 | -302.4055481                           |
| 1595106353                                 | 415.6176147                            | 101.1520178                                    | 177.5048721                                 | -347.3977356                           |

| log.sigma.2.5.mm.3D_firstorder_Entropy | log.sigma.2.5.mm.3D_firstorder_StandardDeviation | log.sigma.2.5.mm.3D_firstorder_Range | log.sigma.2.5.mm.3D_firstorder_Variance | log.sigma.2.5.mm.3D_firstorder_10Percentile |
|----------------------------------------|--------------------------------------------------|--------------------------------------|-----------------------------------------|---------------------------------------------|
| 4.362386472                            | 139.9684288                                      | 889.6058655                          | 19591.16105                             | -155.8503255                                |
| 3.555818813                            | 79.66920327                                      | 612.559906                           | 6347.18195                              | -25.3629659                                 |
| 3.777632713                            | 87.61693547                                      | 580.6559601                          | 7676.727382                             | -39.48959667                                |
| 4.214869263                            | 121.8086077                                      | 758.4019165                          | 14837.33692                             | -146.5387451                                |
| 3.944910594                            | 99.15586227                                      | 703.6517334                          | 9831.885023                             | -86.77052002                                |
| 4.183583458                            | 118.2217042                                      | 756.5473633                          | 13976.37134                             | -71.52948303                                |
| 3.925715605                            | 97.14571197                                      | 947.8013                             | 9437.289355                             | -55.24744034                                |
| 3.899744183                            | 98.73270776                                      | 884.7061157                          | 9748.147582                             | -43.16517334                                |
| 4.068087357                            | 104.7264519                                      | 910.0098877                          | 10967.62973                             | -72.88232422                                |
| 3.988593016                            | 102.5243837                                      | 682.0237732                          | 10511.24924                             | -50.69693527                                |
| 3.726830103                            | 82.24936866                                      | 580.4154663                          | 6764.958646                             | -58.18443642                                |
| 4.0533659                              | 109.6248287                                      | 825.6705933                          | 12017.60307                             | -50.35383682                                |
| 3.42336757                             | 85.12925107                                      | 680.1690063                          | 7246.989388                             | -38.03101807                                |
| 4.130224544                            | 120.3399479                                      | 969.5975342                          | 14481.70305                             | -90.5277832                                 |
| 4.123129555                            | 118.4318488                                      | 948.8489075                          | 14026.10282                             | -107.5797775                                |
| 3.944025025                            | 101.3683125                                      | 801.1118774                          | 10275.53478                             | -71.34590912                                |
| 3.994006042                            | 100.3670592                                      | 636.6240845                          | 10073.54657                             | -97.69004974                                |
| 3.567396862                            | 82.940428                                        | 616.1498108                          | 6879.114597                             | -37.93358154                                |
| 3.53921265                             | 72.56571567                                      | 616.5886688                          | 5265.783091                             | -47.42794075                                |
| 4.065976739                            | 105.6675649                                      | 880.3916931                          | 11165.63428                             | -65.39575195                                |
| 3.508205366                            | 76.57141982                                      | 658.0654907                          | 5863.182334                             | -32.45267296                                |
| 3.706383956                            | 79.95209723                                      | 544.0054016                          | 6392.337852                             | -42.6084549                                 |
| 3.794128411                            | 90.34968739                                      | 677.8067017                          | 8163.066011                             | -47.85297165                                |
| 3.833952906                            | 88.13946944                                      | 654.8493958                          | 7768.566074                             | -55.61287003                                |
| 3.906407011                            | 102.6725028                                      | 881.2007141                          | 10541.64283                             | -36.64203873                                |
| 4.299277881                            | 125.237354                                       | 946.6536865                          | 15684.39484                             | -70.99240112                                |
| 4.214952451                            | 119.6573953                                      | 944.0040085                          | 14317.89225                             | -99.37605896                                |
| 3.896815248                            | 98.26920194                                      | 829.8103638                          | 9656.836051                             | -66.96338959                                |
| 3.632694893                            | 79.17392398                                      | 521.5019226                          | 6268.510238                             | -45.71184921                                |
| 3.600517425                            | 79.25012093                                      | 681.0011902                          | 6280.581667                             | -38.86722603                                |
| 3.90853246                             | 99.41164445                                      | 911.9959717                          | 9882.675052                             | -46.9776886                                 |
| 3.616237185                            | 87.5557596                                       | 684.6175842                          | 7666.011039                             | -86.51976471                                |
| 4.242821408                            | 119.8915847                                      | 864.4755859                          | 14373.99207                             | -131.9158508                                |
| 4.076006474                            | 112.1451083                                      | 812.4565125                          | 12576.52532                             | -89.31441193                                |
| 4.073486555                            | 104.8256586                                      | 926.9978333                          | 10988.4187                              | -60.31430359                                |
| 3.75996158                             | 91.92781846                                      | 751.0106506                          | 8450.723807                             | -35.59605865                                |
| 3.737550332                            | 97.21029498                                      | 1102.310303                          | 9449.841451                             | -67.59947968                                |
| 3.888994612                            | 107.0644232                                      | 932.5791931                          | 11462.79072                             | -75.25479889                                |
| 3.401217018                            | 68.92268699                                      | 556.1890869                          | 4750.336782                             | -53.46022835                                |
| 4.173702729                            | 109.5531648                                      | 771.2510986                          | 12001.89591                             | -107.9149345                                |
| 3.798459639                            | 98.11337334                                      | 752.8222656                          | 9626.234028                             | -98.55321426                                |
| 4.3616508                              | 125.3474106                                      | 836.3532104                          | 15711.97335                             | -132.9382294                                |
| 4.074101071                            | 105.3861855                                      | 766.7688599                          | 11106.2481                              | -69.89710693                                |
| 4.077085936                            | 112.1421152                                      | 1020.2005                            | 12575.85399                             | -111.3634972                                |
| 3.908998886                            | 97.95370442                                      | 721.5454712                          | 9594.92821                              | -26.67945747                                |
| 4.060393788                            | 105.1501087                                      | 860.5123596                          | 11056.54537                             | -61.4397934                                 |
| 3.966760883                            | 101.157459                                       | 885.650116                           | 10232.83151                             | -55.73162651                                |
| 3.475107643                            | 73.22314574                                      | 531.0983582                          | 5361.629073                             | -35.42815781                                |
| 4.07851653                             | 107.7814742                                      | 657.3747559                          | 11616.84618                             | -90.46903992                                |
| 3.738374543                            | 88.77964889                                      | 658.213974                           | 7881.826057                             | -29.66585484                                |
| 4.145559995                            | 113.9726173                                      | 853.6701965                          | 12989.75749                             | -55.02754211                                |
| 4.269195256                            | 118.9445467                                      | 915.6051331                          | 14147.80519                             | -108.3068008                                |
| 3.90118124                             | 93.1972276                                       | 699.8977051                          | 8685.723232                             | -69.60686035                                |
| 3.87488848                             | 92.21531012                                      | 604.3300476                          | 8503.66342                              | -31.92903347                                |
| 4.011814631                            | 99.10035889                                      | 705.0791016                          | 9820.881132                             | -53.28083229                                |
| 3.857984562                            | 94.73518275                                      | 782.8067017                          | 8974.75485                              | -62.1486763                                 |
| 4.118766629                            | 108.3531544                                      | 778.9891357                          | 11740.40606                             | -86.88928833                                |
| 3.872639308                            | 100.7694928                                      | 893.7593079                          | 10154.49067                             | -83.75116272                                |
| 3.893067786                            | 97.84374248                                      | 732.4624634                          | 9573.397942                             | -80.72300034                                |
| 4.098172432                            | 107.8773206                                      | 914.88797                            | 11637.51631                             | -93.38900909                                |
| 3.76935677                             | 96.18407147                                      | 812.0100403                          | 9251.375605                             | -57.45586777                                |
| 3.905263599                            | 97.30219803                                      | 800.2342224                          | 9467.717742                             | -52.14711876                                |
| 4.037649648                            | 104.796534                                       | 832.9501648                          | 10982.31355                             | -55.62894211                                |
| 4.000089675                            | 102.5422235                                      | 941.7954712                          | 10514.9076                              | -73.79022064                                |
| 3.715590585                            | 81.5400588                                       | 522.8510284                          | 6648.781189                             | -45.63411217                                |
| 3.795457635                            | 95.89676409                                      | 900.8762817                          | 9196.189363                             | -56.07691803                                |
| 3.446441265                            | 78.32629016                                      | 793.9854736                          | 6135.00773                              | -58.43315544                                |
| 4.020789999                            | 105.568911                                       | 949.7190247                          | 11144.79497                             | -96.92002869                                |
| 4.030693021                            | 103.5520782                                      | 989.1953125                          | 10723.03291                             | -84.7110611                                 |
| 3.532559544                            | 75.79493872                                      | 650.2965393                          | 5744.872735                             | -33.99304619                                |
| 3.896985837                            | 94.82407321                                      | 722.8725586                          | 8991.60486                              | -83.13425293                                |
| 3.920330651                            | 101.0650651                                      | 925.3237915                          | 10214.14738                             | -35.43358421                                |
| 3.998093777                            | 106.9918113                                      | 934.4890747                          | 11447.24768                             | -67.37496948                                |
| 4.303918931                            | 128.571664                                       | 784.9141846                          | 16530.67279                             | -165.1198547                                |
| 4.250507723                            | 116.0307828                                      | 820.1985168                          | 13463.14255                             | -114.1171188                                |
| 3.747300288                            | 95.01055146                                      | 712.774292                           | 9027.004889                             | -78.70310669                                |
| 3.620474114                            | 77.47469994                                      | 667.2185974                          | 6002.329131                             | -34.21729469                                |
| 3.715180761                            | 89.97859651                                      | 650.4824829                          | 8096.14783                              | -45.43897781                                |
| 3.748361609                            | 85.87360481                                      | 719.7463989                          | 7374.276003                             | -57.87937546                                |
| 4.281504578                            | 126.5833645                                      | 988.5018005                          | 16023.34818                             | -159.9470398                                |
| 4.342152741                            | 138.9366903                                      | 889.4289246                          | 19303.40392                             | -158.184317                                 |
| 4.005538111                            | 106.3215603                                      | 786.2563782                          | 11304.27419                             | -129.4596405                                |
| 3.91880716                             | 97.86421127                                      | 817.7863464                          | 9577.403848                             | -56.98536682                                |
| 3.669706686                            | 79.0512394                                       | 554.1959839                          | 6249.098451                             | -67.86227112                                |
| 4.173438065                            | 113.3302789                                      | 805.931488                           | 12843.75211                             | -111.1897186                                |
| 3.253800825                            | 64.6651178                                       | 573.6717224                          | 4181.57746                              | -29.59920597                                |
| 4.146294077                            | 118.5635488                                      | 829.9221191                          | 14057.31511                             | -146.4228912                                |
| 3.947116561                            | 99.6326054                                       | 721.3551331                          | 9926.786605                             | -34.18015175                                |
| 3.76626712                             | 90.20072733                                      | 707.2111816                          | 8136.71211                              | -36.55571098                                |
| 3.751132334                            | 91.73893448                                      | 776.4436035                          | 8416.032099                             | -51.17634277                                |
| 3.310536955                            | 75.02878658                                      | 573.8165894                          | 5629.318815                             | -23.77582378                                |
| 4.141462406                            | 108.5271597                                      | 108.5271597                          | 11778.14439                             | -63.43581047                                |
| 4.077914007                            | 109.0323435                                      | 900.5964661                          | 11888.05192                             | -112.0925201                                |
| 3.901639002                            | 98.02325282                                      | 692.0802612                          | 9608.558094                             | -54.90319633                                |
| 4.010066186                            | 100.8007713                                      | 736.1174011                          | 10160.7955                              | -112.0103653                                |
| 4.054776088                            | 115.5849997                                      | 912.0483093                          | 13359.89216                             | -71.94442825                                |
| 3.964337994                            | 97.12770835                                      | 718.708374                           | 9433.79173                              | -96.61456299                                |
| 3.684079938                            | 98.33954316                                      | 827.1689758                          | 9670.66575                              | -131.377533                                 |
| 3.485384316                            | 73.95910811                                      | 514.6224213                          | 5469.949672                             | -63.48984642                                |
| 3.682914785                            | 86.44324653                                      | 763.0153503                          | 7472.43487                              | -32.80231628                                |

| log.sigma.2.5.mm.3D_firstorder_Kurtosis | log.sigma.2.5.mm.3D_firstorder_Mean | log.sigma.2.5.mm.3D_glrIm_ShortRunLowGrayLevelEmphasis | log.sigma.2.5.mm.3D_glrIm_GrayLevelVariance |
|-----------------------------------------|-------------------------------------|--------------------------------------------------------|---------------------------------------------|
| 4.501858638                             | 31.87234799                         | 0.005129976                                            | 32.77715838                                 |
| 4.982634443                             | 53.75836151                         | 0.008859424                                            | 11.10711787                                 |
| 3.734983172                             | 55.77039918                         | 0.016155868                                            | 13.28149937                                 |
| 3.516986672                             | 24.57281625                         | 0.005978305                                            | 24.66041646                                 |
| 4.493385242                             | 36.17304882                         | 0.005494671                                            | 16.74866007                                 |
| 3.61047129                              | 56.30765124                         | 0.006490943                                            | 23.4378839                                  |
| 4.480597558                             | 50.48437429                         | 0.00282707                                             | 16.11856231                                 |
| 4.83153977                              | 56.71501715                         | 0.002866307                                            | 16.8654318                                  |
| 4.200153755                             | 56.24390682                         | 0.002421077                                            | 18.50916759                                 |
| 4.48323397                              | 64.58613659                         | 0.006082891                                            | 17.52355685                                 |
| 3.75291866                              | 41.34277852                         | 0.009237494                                            | 11.44042952                                 |
| 4.98284712                              | 65.8589329                          | 0.002963978                                            | 20.39326087                                 |
| 6.959377937                             | 30.74709816                         | 0.006090935                                            | 13.34909102                                 |
| 6.47496064                              | 44.74328975                         | 0.003113355                                            | 24.68334813                                 |
| 4.913420007                             | 47.67786826                         | 0.004149346                                            | 23.68581022                                 |
| 4.538342479                             | 42.48018674                         | 0.004882796                                            | 17.62467204                                 |
| 3.401946844                             | 38.47826096                         | 0.00786046                                             | 16.78604552                                 |
| 4.446525628                             | 45.22717722                         | 0.00877905                                             | 12.1095687                                  |
| 3.921967702                             | 39.22540773                         | 0.007570898                                            | 8.935678863                                 |
| 4.037683507                             | 56.3611892                          | 0.003328003                                            | 18.88775721                                 |
| 4.857121658                             | 43.01711                            | 0.005145869                                            | 10.39577952                                 |
| 3.527013127                             | 51.48805592                         | 0.00785478                                             | 10.80802102                                 |
| 4.543189108                             | 44.85068232                         | 0.00593187                                             | 13.91280783                                 |
| 3.727800947                             | 50.23198519                         | 0.006994558                                            | 13.02417238                                 |
| 6.487711143                             | 61.35819745                         | 0.004401923                                            | 18.08786663                                 |
| 4.33799606                              | 67.91110762                         | 0.003549973                                            | 26.09711132                                 |
| 4.047103595                             | 52.43534235                         | 0.003319212                                            | 24.0776981                                  |
| 5.245265656                             | 39.60883077                         | 0.003430481                                            | 16.60201885                                 |
| 3.347334088                             | 48.74910495                         | 0.008656101                                            | 10.30108616                                 |
| 5.570087728                             | 47.91604177                         | 0.004320297                                            | 10.77169791                                 |
| 5.480197387                             | 53.31986818                         | 0.002419896                                            | 17.11614509                                 |
| 5.99402295                              | 18.45785314                         | 0.00522006                                             | 13.50971535                                 |
| 3.765899781                             | 33.60726691                         | 0.00387867                                             | 23.99676997                                 |
| 4.86100977                              | 44.82619919                         | 0.003516618                                            | 21.48192405                                 |
| 3.870863387                             | 68.42522715                         | 0.004350451                                            | 18.4770641                                  |
| 4.892335299                             | 51.63604595                         | 0.006111779                                            | 14.72384969                                 |
| 7.379274789                             | 25.84363932                         | 0.002094457                                            | 16.88889708                                 |
| 5.182421022                             | 37.20044804                         | 0.003345778                                            | 20.76927222                                 |
| 5.707141495                             | 30.72866125                         | 0.008671511                                            | 8.096993347                                 |
| 3.014810859                             | 34.51306925                         | 0.005536703                                            | 19.80669945                                 |
| 5.278129495                             | 22.12591128                         | 0.007325834                                            | 16.70244788                                 |
| 3.177127226                             | 31.68838018                         | 0.006633067                                            | 25.76873212                                 |
| 3.960179777                             | 56.62936932                         | 0.004132406                                            | 18.62744596                                 |
| 4.921983213                             | 36.95876546                         | 0.002433321                                            | 21.33246163                                 |
| 4.243091011                             | 73.86083319                         | 0.005823768                                            | 16.25476007                                 |
| 4.192659218                             | 62.20080722                         | 0.003356089                                            | 18.76601974                                 |
| 4.807502716                             | 53.07189109                         | 0.003582626                                            | 17.48177406                                 |
| 4.659528001                             | 49.55000881                         | 0.010581336                                            | 9.251753284                                 |
| 3.795355478                             | 53.31776908                         | 0.009687958                                            | 19.3904579                                  |
| 3.634039168                             | 61.32295518                         | 0.010082353                                            | 13.42151884                                 |
| 4.805575264                             | 70.80197038                         | 0.00307359                                             | 21.71159047                                 |
| 3.64375793                              | 47.66275289                         | 0.005485658                                            | 23.30207284                                 |
| 3.907867933                             | 42.45545589                         | 0.009651132                                            | 14.56593476                                 |
| 3.669266036                             | 70.5451784                          | 0.008659975                                            | 14.35008408                                 |
| 3.321148186                             | 63.08558517                         | 0.004323404                                            | 16.38183049                                 |
| 5.467027975                             | 43.87570163                         | 0.002797224                                            | 15.42235144                                 |
| 3.665246677                             | 55.72716078                         | 0.00406243                                             | 19.607658                                   |
| 5.70489737                              | 29.86994585                         | 0.003467548                                            | 17.49953681                                 |
| 4.954675592                             | 32.32701559                         | 0.006752379                                            | 16.30746808                                 |
| 4.212581227                             | 29.42730241                         | 0.002647289                                            | 19.7278424                                  |
| 5.031951271                             | 45.60080806                         | 0.004470995                                            | 16.34571461                                 |
| 5.059225965                             | 54.63410414                         | 0.004710645                                            | 16.20114944                                 |
| 4.190080228                             | 61.54283889                         | 0.003448042                                            | 18.50082835                                 |
| 4.416992928                             | 39.32076951                         | 0.00215503                                             | 17.746861                                   |
| 3.298587787                             | 56.29531412                         | 0.015134983                                            | 11.13230004                                 |
| 6.232701339                             | 35.42148313                         | 0.002924532                                            | 16.23667665                                 |
| 8.912075971                             | 20.81584951                         | 0.003840539                                            | 11.04940198                                 |
| 4.716523651                             | 31.69711374                         | 0.003009672                                            | 18.94441694                                 |
| 4.536609156                             | 48.09521717                         | 0.003207219                                            | 18.06792927                                 |
| 5.261751704                             | 42.62809864                         | 0.004152499                                            | 10.06740884                                 |
| 4.277051511                             | 36.5478838                          | 0.006230642                                            | 15.18685751                                 |
| 5.192537872                             | 61.27276514                         | 0.004088288                                            | 17.59342447                                 |
| 5.587281106                             | 49.02699473                         | 0.002600996                                            | 19.62934476                                 |
| 3.42418471                              | 21.37637662                         | 0.007272195                                            | 27.47615827                                 |
| 3.199247915                             | 32.36951293                         | 0.006259336                                            | 22.10812457                                 |
| 6.462052014                             | 34.56684179                         | 0.004331902                                            | 15.38062459                                 |
| 4.290336178                             | 52.13189906                         | 0.004954261                                            | 10.39639138                                 |
| 4.981158002                             | 44.77242811                         | 0.010400978                                            | 14.08651466                                 |
| 4.657400788                             | 42.94644626                         | 0.005404184                                            | 12.454074                                   |
| 3.977315182                             | 19.85874782                         | 0.002814082                                            | 26.44158896                                 |
| 4.409472492                             | 32.62386036                         | 0.004201037                                            | 32.19625263                                 |
| 4.268342098                             | 17.51241965                         | 0.007831938                                            | 19.38260986                                 |
| 4.745731135                             | 48.19739103                         | 0.003890325                                            | 16.52397257                                 |
| 3.584225146                             | 38.3861874                          | 0.006650954                                            | 10.45860574                                 |
| 3.611639366                             | 40.44091198                         | 0.004776442                                            | 21.46622791                                 |
| 5.161286064                             | 33.5930418                          | 0.004714506                                            | 7.590406438                                 |
| 4.101311011                             | 17.44900037                         | 0.004651515                                            | 23.80288116                                 |
| 3.8951185                               | 68.66728933                         | 0.004037515                                            | 16.89764335                                 |
| 5.324200973                             | 52.71932474                         | 0.005126594                                            | 13.80714966                                 |
| 6.258586298                             | 43.26506016                         | 0.003099955                                            | 14.692049                                   |
| 3.958010767                             | 46.11929376                         | 0.006549225                                            | 10.05110416                                 |
| 3.322972463                             | 68.14839099                         | 0.004996323                                            | 19.37326583                                 |
| 4.356104941                             | 29.70473024                         | 0.00363832                                             | 20.05038813                                 |
| 4.80770036                              | 53.05540885                         | 0.00537736                                             | 16.38307597                                 |
| 3.539505337                             | 27.48249123                         | 0.003794222                                            | 18.83926741                                 |
| 5.561403296                             | 45.55218371                         | 0.003278802                                            | 23.06502817                                 |
| 3.638690859                             | 32.43378676                         | 0.005548937                                            | 15.81857147                                 |
| 5.655160286                             | 10.10183631                         | 0.003738156                                            | 16.68180447                                 |
| 5.055359748                             | 23.91417854                         | 0.007319222                                            | 9.294428                                    |
| 4.418321831                             | 52.52899989                         | 0.004637627                                            | 13.09867784                                 |

| log.sigma.2.5.mm.3D_glrIm_LowGrayLevelRunEmphasis | log.sigma.2.5.mm.3D_glrIm_GrayLevelNonUniformityNormalized | log.sigma.2.5.mm.3D_glrIm_RunVariance | log.sigma.2.5.mm.3D_glrIm_GrayLevelNonUniformity |
|---------------------------------------------------|------------------------------------------------------------|---------------------------------------|--------------------------------------------------|
| 0.005275029                                       | 0.060154133                                                | 0.097988754                           | 118.2177051                                      |
| 0.009445239                                       | 0.107620107                                                | 0.183412794                           | 87.71383691                                      |
| 0.017228931                                       | 0.087624692                                                | 0.208173947                           | 117.2255297                                      |
| 0.006191745                                       | 0.065674545                                                | 0.109316384                           | 58.62781693                                      |
| 0.005760001                                       | 0.080139604                                                | 0.134428887                           | 171.1393506                                      |
| 0.006738184                                       | 0.068918526                                                | 0.093375083                           | 41.97370753                                      |
| 0.00303142                                        | 0.080623797                                                | 0.159717615                           | 406.6928943                                      |
| 0.00307398                                        | 0.084827048                                                | 0.16445426                            | 384.2389093                                      |
| 0.002562032                                       | 0.071390966                                                | 0.124505894                           | 294.125669                                       |
| 0.006358711                                       | 0.07557986                                                 | 0.101803109                           | 74.25077248                                      |
| 0.009737175                                       | 0.089607579                                                | 0.122299189                           | 122.2599878                                      |
| 0.003111095                                       | 0.074995216                                                | 0.115379625                           | 157.4025958                                      |
| 0.006596513                                       | 0.124861272                                                | 0.318590997                           | 193.5037515                                      |
| 0.003219412                                       | 0.074478753                                                | 0.130391574                           | 115.6082235                                      |
| 0.00431905                                        | 0.073902826                                                | 0.109356811                           | 134.0624675                                      |
| 0.005172743                                       | 0.081658153                                                | 0.169074618                           | 316.9628896                                      |
| 0.008238846                                       | 0.074237783                                                | 0.095313207                           | 81.49672825                                      |
| 0.009434315                                       | 0.10912772                                                 | 0.202693813                           | 116.0791117                                      |
| 0.008114047                                       | 0.102371323                                                | 0.152085184                           | 117.9609076                                      |
| 0.003530975                                       | 0.073827056                                                | 0.125914369                           | 347.1513784                                      |
| 0.005702451                                       | 0.109016085                                                | 0.28329583                            | 276.9438218                                      |
| 0.008268206                                       | 0.090080327                                                | 0.117290226                           | 88.18395479                                      |
| 0.006251392                                       | 0.08902026                                                 | 0.141119762                           | 81.67281254                                      |
| 0.007437585                                       | 0.0838134                                                  | 0.138113994                           | 199.6461904                                      |
| 0.004624905                                       | 0.084453439                                                | 0.136203231                           | 96.56810723                                      |
| 0.003704248                                       | 0.063379472                                                | 0.092527065                           | 138.8915539                                      |
| 0.003502873                                       | 0.067840865                                                | 0.127473471                           | 198.9814566                                      |
| 0.003635588                                       | 0.085447987                                                | 0.137046908                           | 211.7963949                                      |
| 0.009069784                                       | 0.094450716                                                | 0.102867686                           | 38.64844437                                      |
| 0.004609136                                       | 0.104302229                                                | 0.147389434                           | 190.3960599                                      |
| 0.002594205                                       | 0.083963236                                                | 0.170072836                           | 353.540368                                       |
| 0.005550828                                       | 0.107310426                                                | 0.194500599                           | 194.0271088                                      |
| 0.004076566                                       | 0.064740358                                                | 0.126191061                           | 190.2413567                                      |
| 0.003707021                                       | 0.073500381                                                | 0.149352192                           | 154.9009931                                      |
| 0.00457789                                        | 0.070989444                                                | 0.115631576                           | 285.0702654                                      |
| 0.006566607                                       | 0.092223791                                                | 0.193438105                           | 241.746696                                       |
| 0.002258226                                       | 0.100944307                                                | 0.202131734                           | 326.6391873                                      |
| 0.003641451                                       | 0.085594778                                                | 0.32844599                            | 369.451467                                       |
| 0.009144977                                       | 0.111774952                                                | 0.133685829                           | 122.9527735                                      |
| 0.005844102                                       | 0.064055813                                                | 0.107055074                           | 426.8587714                                      |
| 0.007737339                                       | 0.094747748                                                | 0.168162412                           | 217.2191859                                      |
| 0.006902999                                       | 0.056808221                                                | 0.073061054                           | 205.6846643                                      |
| 0.004350779                                       | 0.070974099                                                | 0.112763899                           | 236.0542271                                      |
| 0.002548163                                       | 0.075561235                                                | 0.113434762                           | 171.7313002                                      |
| 0.006123902                                       | 0.083298929                                                | 0.124411147                           | 96.18987323                                      |
| 0.003543886                                       | 0.073755371                                                | 0.121483557                           | 184.1809244                                      |
| 0.003807841                                       | 0.080853239                                                | 0.140047601                           | 331.4796084                                      |
| 0.011215094                                       | 0.112264374                                                | 0.152189271                           | 86.12118714                                      |
| 0.009979745                                       | 0.07236211                                                 | 0.09414006                            | 56.78801298                                      |
| 0.010739813                                       | 0.090801326                                                | 0.180681614                           | 107.6697907                                      |
| 0.003209115                                       | 0.069016236                                                | 0.102415196                           | 162.8657132                                      |
| 0.005691073                                       | 0.062646725                                                | 0.079615738                           | 196.9754536                                      |
| 0.010097466                                       | 0.081942866                                                | 0.112224149                           | 336.5902266                                      |
| 0.009144702                                       | 0.081424575                                                | 0.118039474                           | 81.58254497                                      |
| 0.004542284                                       | 0.072118351                                                | 0.10557708                            | 87.8909404                                       |
| 0.002960152                                       | 0.087391201                                                | 0.133348087                           | 152.8032912                                      |
| 0.004253902                                       | 0.06890564                                                 | 0.101812475                           | 256.0920143                                      |
| 0.003695613                                       | 0.088486015                                                | 0.154346799                           | 272.1987909                                      |
| 0.007006284                                       | 0.085174549                                                | 0.117751504                           | 127.4622575                                      |
| 0.00282896                                        | 0.069467408                                                | 0.165102295                           | 567.1667388                                      |
| 0.004814462                                       | 0.096923836                                                | 0.202592975                           | 148.9552053                                      |
| 0.004939453                                       | 0.082085428                                                | 0.136218378                           | 197.4210565                                      |
| 0.003654531                                       | 0.074389244                                                | 0.128679621                           | 390.2291815                                      |
| 0.002308363                                       | 0.078040081                                                | 0.136621068                           | 534.4048046                                      |
| 0.01601765                                        | 0.089679181                                                | 0.135501122                           | 63.57518147                                      |
| 0.003132585                                       | 0.092968296                                                | 0.192715566                           | 313.7549606                                      |
| 0.004088306                                       | 0.117876079                                                | 0.208144677                           | 132.6763986                                      |
| 0.003200319                                       | 0.079074685                                                | 0.143981781                           | 443.4975887                                      |
| 0.003377348                                       | 0.075348153                                                | 0.115027773                           | 401.8567973                                      |
| 0.004495367                                       | 0.107022969                                                | 0.186424966                           | 270.3869521                                      |
| 0.006563745                                       | 0.082021928                                                | 0.133132169                           | 96.07127999                                      |
| 0.004320599                                       | 0.083480264                                                | 0.163700612                           | 317.181179                                       |
| 0.002748575                                       | 0.07945993                                                 | 0.147612165                           | 162.3228779                                      |
| 0.007481607                                       | 0.061398153                                                | 0.092307064                           | 128.4917616                                      |
| 0.006558982                                       | 0.061216675                                                | 0.091197756                           | 177.3932702                                      |
| 0.004533082                                       | 0.094625258                                                | 0.145414475                           | 117.3393516                                      |
| 0.005346578                                       | 0.099780714                                                | 0.164067358                           | 211.1123712                                      |
| 0.010959178                                       | 0.09870112                                                 | 0.17392065                            | 83.26601419                                      |
| 0.005713405                                       | 0.091433613                                                | 0.1295525                             | 140.5067362                                      |
| 0.002925845                                       | 0.063547507                                                | 0.086037373                           | 138.0139646                                      |
| 0.004322487                                       | 0.061450408                                                | 0.099341188                           | 113.1236026                                      |
| 0.008228724                                       | 0.078664618                                                | 0.14212972                            | 126.9227907                                      |
| 0.004143219                                       | 0.081112901                                                | 0.194243949                           | 233.7435788                                      |
| 0.007128894                                       | 0.093572962                                                | 0.139545759                           | 256.4641411                                      |
| 0.005000997                                       | 0.06681162                                                 | 0.117322481                           | 148.932563                                       |
| 0.005242291                                       | 0.131868521                                                | 0.294921675                           | 167.721345                                       |
| 0.004871474                                       | 0.07061053                                                 | 0.136895725                           | 151.8134423                                      |
| 0.004304229                                       | 0.077955477                                                | 0.154369119                           | 190.7511527                                      |
| 0.005414967                                       | 0.091122716                                                | 0.149760668                           | 119.3485627                                      |
| 0.003320813                                       | 0.095153467                                                | 0.181423828                           | 168.8062103                                      |
| 0.0073369                                         | 0.126006395                                                | 0.264304313                           | 137.8046605                                      |
| 0.005221293                                       | 0.066695283                                                | 0.089562981                           | 147.3329381                                      |
| 0.00383052                                        | 0.074010008                                                | 0.110845152                           | 350.0619248                                      |
| 0.005662158                                       | 0.083011663                                                | 0.143899018                           | 245.3941652                                      |
| 0.003985458                                       | 0.073931734                                                | 0.096810338                           | 295.8844913                                      |
| 0.003466977                                       | 0.077073626                                                | 0.179438204                           | 233.5669197                                      |
| 0.005871878                                       | 0.078081678                                                | 0.11977917                            | 199.4540534                                      |
| 0.003944027                                       | 0.102826265                                                | 0.171012647                           | 94.84378952                                      |
| 0.007762858                                       | 0.108889312                                                | 0.162235972                           | 80.10752566                                      |
| 0.005050874                                       | 0.097181033                                                | 0.218077777                           | 484.8351459                                      |

| log.sigma.2.5.mm.3D_glrIm_LongRunEmphasis | log.sigma.2.5.mm.3D_glrIm_ShortRunHighGrayLevelEmphasis | log.sigma.2.5.mm.3D_glrIm_RunLengthNonUniformity | log.sigma.2.5.mm.3D_glrIm_ShortRunEmphasis |
|-------------------------------------------|---------------------------------------------------------|--------------------------------------------------|--------------------------------------------|
| 1.266112398                               | 516.5918432                                             | 1706.838024                                      | 0.945802115                                |
| 1.508442306                               | 180.1618495                                             | 634.6184294                                      | 0.902558848                                |
| 1.535248153                               | 139.2467862                                             | 1048.805911                                      | 0.905230139                                |
| 1.310781725                               | 337.7955892                                             | 753.9153368                                      | 0.934798267                                |
| 1.367824106                               | 311.2369916                                             | 1765.889735                                      | 0.926828611                                |
| 1.2708102                                 | 288.0210357                                             | 523.0514525                                      | 0.941193628                                |
| 1.419384177                               | 405.7087619                                             | 4116.748146                                      | 0.921313409                                |
| 1.439557725                               | 413.0206649                                             | 3649.505468                                      | 0.916643715                                |
| 1.345447503                               | 496.9576883                                             | 3437.858688                                      | 0.930094925                                |
| 1.294965373                               | 321.1086639                                             | 832.5319007                                      | 0.936351942                                |
| 1.348874346                               | 169.8327986                                             | 1131.411398                                      | 0.927383756                                |
| 1.323630259                               | 476.2434769                                             | 1763.070006                                      | 0.93303907                                 |
| 1.788345731                               | 260.0218824                                             | 1127.76105                                       | 0.876268903                                |
| 1.358246363                               | 662.5863658                                             | 1288.767585                                      | 0.928323726                                |
| 1.30894234                                | 409.3817806                                             | 1535.858214                                      | 0.935723439                                |
| 1.446305068                               | 322.431818                                              | 3134.820833                                      | 0.917060953                                |
| 1.280216047                               | 226.4209549                                             | 934.5394131                                      | 0.938148204                                |
| 1.553523221                               | 171.0575197                                             | 813.6713096                                      | 0.896189345                                |
| 1.424417657                               | 164.790441                                              | 924.1746751                                      | 0.914874057                                |
| 1.35090954                                | 380.8623678                                             | 3903.237967                                      | 0.928330177                                |
| 1.712865327                               | 216.2919287                                             | 1883.193968                                      | 0.883029327                                |
| 1.33536122                                | 180.5241838                                             | 815.740947                                       | 0.929632522                                |
| 1.391036634                               | 258.1702216                                             | 750.7254779                                      | 0.922322881                                |
| 1.377373713                               | 207.2133315                                             | 1963.87071                                       | 0.925262884                                |
| 1.381128898                               | 463.4464646                                             | 937.6778501                                      | 0.923146689                                |
| 1.262960604                               | 450.2774386                                             | 1893.421512                                      | 0.943723036                                |
| 1.345879755                               | 417.9865968                                             | 2455.576194                                      | 0.931428131                                |
| 1.382661079                               | 386.9546444                                             | 2027.805386                                      | 0.922532246                                |
| 1.299332217                               | 179.207744                                              | 345.9114889                                      | 0.935017572                                |
| 1.418551766                               | 285.482092                                              | 1465.612045                                      | 0.915044662                                |
| 1.451946997                               | 486.2298655                                             | 3386.392495                                      | 0.915592803                                |
| 1.511605042                               | 278.7851412                                             | 1421.827984                                      | 0.90665316                                 |
| 1.338153735                               | 388.889506                                              | 2472.859599                                      | 0.933130918                                |
| 1.396447475                               | 439.2602315                                             | 1733.155662                                      | 0.924451986                                |
| 1.32070731                                | 328.9588335                                             | 3386.349738                                      | 0.934378299                                |
| 1.507404909                               | 266.4695637                                             | 2065.308108                                      | 0.907742947                                |
| 1.53484947                                | 557.6921086                                             | 2522.776386                                      | 0.903066282                                |
| 1.771295386                               | 416.3232778                                             | 3211.22981                                       | 0.885013062                                |
| 1.387697054                               | 203.9616379                                             | 891.2907571                                      | 0.918838627                                |
| 1.299936382                               | 255.2813023                                             | 5662.632923                                      | 0.937269498                                |
| 1.455992737                               | 258.1766492                                             | 1831.931856                                      | 0.913015948                                |
| 1.215172589                               | 261.0695736                                             | 3189.090903                                      | 0.951351973                                |
| 1.322878257                               | 345.1364755                                             | 2789.702634                                      | 0.931985616                                |
| 1.315056906                               | 552.4307508                                             | 1921.523524                                      | 0.935242605                                |
| 1.354555805                               | 267.4700134                                             | 955.0724315                                      | 0.926535275                                |
| 1.333199699                               | 391.9067036                                             | 2099.700547                                      | 0.932976415                                |
| 1.381027583                               | 373.4049268                                             | 3372.369487                                      | 0.924800329                                |
| 1.445666075                               | 149.2356903                                             | 604.0086503                                      | 0.907430273                                |
| 1.27306774                                | 246.5024362                                             | 672.4345763                                      | 0.940512974                                |
| 1.489196465                               | 167.3993897                                             | 938.099277                                       | 0.90812376                                 |
| 1.289211966                               | 487.774033                                              | 2012.064824                                      | 0.938876087                                |
| 1.230659509                               | 307.9855655                                             | 2753.636139                                      | 0.949095317                                |
| 1.320732275                               | 200.5534124                                             | 3442.230939                                      | 0.932153009                                |
| 1.336415818                               | 180.7514661                                             | 835.3890353                                      | 0.929581986                                |
| 1.298988672                               | 321.2314338                                             | 1034.311647                                      | 0.936849934                                |
| 1.38033367                                | 468.910714                                              | 1425.960303                                      | 0.921342296                                |
| 1.288708894                               | 346.586663                                              | 3169.109822                                      | 0.938752939                                |
| 1.423027126                               | 407.4212506                                             | 2484.823974                                      | 0.917269323                                |
| 1.333644899                               | 275.3934073                                             | 1249.418309                                      | 0.930384006                                |
| 1.419839273                               | 454.3472714                                             | 6710.134037                                      | 0.923931918                                |
| 1.531111553                               | 288.8619694                                             | 1199.663305                                      | 0.90424684                                 |
| 1.372159906                               | 373.6331229                                             | 1985.081906                                      | 0.926020644                                |
| 1.349240677                               | 389.7147261                                             | 4385.393362                                      | 0.930978833                                |
| 1.379822212                               | 508.660466                                              | 5620.753825                                      | 0.923608934                                |
| 1.383251597                               | 116.9106113                                             | 580.4432514                                      | 0.92200803                                 |
| 1.508028607                               | 452.1835845                                             | 2650.881919                                      | 0.906595794                                |
| 1.555615814                               | 378.7355374                                             | 866.5156345                                      | 0.898709349                                |
| 1.389069323                               | 413.9167215                                             | 4601.76946                                       | 0.923669545                                |
| 1.323816247                               | 402.064634                                              | 4478.987544                                      | 0.932697958                                |
| 1.508336938                               | 277.4507676                                             | 1968.929161                                      | 0.903525608                                |
| 1.367770412                               | 279.2754028                                             | 969.0376435                                      | 0.926546289                                |
| 1.443971543                               | 382.3830271                                             | 3045.985999                                      | 0.914678458                                |
| 1.397234634                               | 525.9216101                                             | 1674.126752                                      | 0.923072861                                |
| 1.259113405                               | 340.6639797                                             | 1814.059527                                      | 0.945159902                                |
| 1.260769419                               | 256.9302312                                             | 2505.455466                                      | 0.94393689                                 |
| 1.402085539                               | 372.4752076                                             | 976.3894505                                      | 0.920118368                                |
| 1.451054509                               | 232.4344276                                             | 1685.341032                                      | 0.912155699                                |
| 1.468519782                               | 200.1239266                                             | 668.6366091                                      | 0.910343598                                |
| 1.366532144                               | 253.8966884                                             | 1263.278144                                      | 0.924484662                                |
| 1.248082521                               | 534.8983877                                             | 1885.05172                                       | 0.945664987                                |
| 1.269203249                               | 518.1148824                                             | 1597.276667                                      | 0.945382504                                |
| 1.389345809                               | 229.1359783                                             | 1321.110774                                      | 0.9226928                                  |
| 1.493701745                               | 363.1490072                                             | 2313.42712                                       | 0.913786375                                |
| 1.400424969                               | 189.0475173                                             | 2212.843049                                      | 0.917160413                                |
| 1.318808185                               | 325.1117012                                             | 1891.554549                                      | 0.936400371                                |
| 1.76056738                                | 226.7192328                                             | 918.8688722                                      | 0.873485627                                |
| 1.37336956                                | 359.3150119                                             | 1779.902156                                      | 0.926585451                                |
| 1.413272244                               | 324.879682                                              | 1994.508359                                      | 0.921008676                                |
| 1.405604716                               | 298.1062687                                             | 1070.209756                                      | 0.921454201                                |
| 1.492274755                               | 421.1136459                                             | 1395.995544                                      | 0.906769784                                |
| 1.698432455                               | 170.9785808                                             | 800.4408317                                      | 0.878759025                                |
| 1.255011657                               | 298.8463579                                             | 1917.284177                                      | 0.945266253                                |
| 1.313789166                               | 379.2499238                                             | 3984.343156                                      | 0.934080611                                |
| 1.393623285                               | 300.8207483                                             | 2417.264913                                      | 0.922270472                                |
| 1.281216153                               | 338.149492                                              | 3410.704163                                      | 0.938623665                                |
| 1.459581193                               | 521.777447                                              | 2444.247377                                      | 0.916759598                                |
| 1.33909468                                | 246.1709492                                             | 2127.532364                                      | 0.929444282                                |
| 1.467894861                               | 406.3476554                                             | 730.6064357                                      | 0.909726952                                |
| 1.454339063                               | 194.7322412                                             | 582.8186691                                      | 0.909713074                                |
| 1.564569519                               | 264.0848703                                             | 3861.110283                                      | 0.900702936                                |

| log.sigma.2.5.mm.3D_glrIm_LongRunHighGrayLevelEmphasis | log.sigma.2.5.mm.3D_glrIm_RunPercentage | log.sigma.2.5.mm.3D_glrIm_LongRunLowGrayLevelEmphasis | log.sigma.2.5.mm.3D_glrIm_RunEntropy |
|--------------------------------------------------------|-----------------------------------------|-------------------------------------------------------|--------------------------------------|
| 700.7149882                                            | 0.925940695                             | 0.005945852                                           | 4.777051527                          |
| 293.1045921                                            | 0.870999589                             | 0.012483567                                           | 4.215101724                          |
| 224.0354662                                            | 0.871376993                             | 0.022897426                                           | 4.421044316                          |
| 485.1858455                                            | 0.913392646                             | 0.007194685                                           | 4.662171081                          |
| 464.2300781                                            | 0.901474792                             | 0.007049424                                           | 4.47301394                           |
| 381.443675                                             | 0.922610723                             | 0.007867398                                           | 4.58726847                           |
| 611.9147764                                            | 0.89232675                              | 0.004119438                                           | 4.500785151                          |
| 637.6740493                                            | 0.886482742                             | 0.00416733                                            | 4.5099071                            |
| 720.8268247                                            | 0.906122035                             | 0.003257173                                           | 4.574429223                          |
| 445.4039811                                            | 0.916260046                             | 0.007588977                                           | 4.437835265                          |
| 248.1384142                                            | 0.904509284                             | 0.012087967                                           | 4.229399316                          |
| 672.8730124                                            | 0.910428834                             | 0.003816977                                           | 4.544435506                          |
| 512.3248974                                            | 0.828313625                             | 0.009723816                                           | 4.296944016                          |
| 968.8413046                                            | 0.903543748                             | 0.003750137                                           | 4.654259023                          |
| 574.3497373                                            | 0.914081886                             | 0.00512116                                            | 4.596868931                          |
| 496.6984339                                            | 0.886549009                             | 0.00674453                                            | 4.545538437                          |
| 310.7356071                                            | 0.919404716                             | 0.009894407                                           | 4.423493631                          |
| 287.5142222                                            | 0.862062512                             | 0.012898759                                           | 4.27142112                           |
| 254.4697457                                            | 0.887637786                             | 0.010807516                                           | 4.11565505                           |
| 548.2196957                                            | 0.904315919                             | 0.004514904                                           | 4.589808778                          |
| 404.7665402                                            | 0.839336589                             | 0.009100828                                           | 4.308094058                          |
| 260.84453                                              | 0.907107721                             | 0.010210472                                           | 4.192320904                          |
| 386.3021255                                            | 0.895733173                             | 0.007849469                                           | 4.336412799                          |
| 304.0616154                                            | 0.899712301                             | 0.009626075                                           | 4.361245298                          |
| 684.0410136                                            | 0.897818599                             | 0.005678182                                           | 4.450216756                          |
| 598.2219605                                            | 0.925025165                             | 0.004412789                                           | 4.717102986                          |
| 597.601843                                             | 0.906945205                             | 0.004426018                                           | 4.720323804                          |
| 578.2522468                                            | 0.897175959                             | 0.0046408                                             | 4.453133824                          |
| 245.1812718                                            | 0.915332989                             | 0.010990054                                           | 4.059504351                          |
| 445.9742599                                            | 0.888435323                             | 0.006018114                                           | 4.190296688                          |
| 761.7207145                                            | 0.884566883                             | 0.003526317                                           | 4.522584991                          |
| 470.9989619                                            | 0.873331598                             | 0.007326374                                           | 4.28324768                           |
| 556.9993741                                            | 0.90987922                              | 0.00506448                                            | 4.727014489                          |
| 658.4512871                                            | 0.896563011                             | 0.00468542                                            | 4.622048938                          |
| 460.248235                                             | 0.911706141                             | 0.005678501                                           | 4.55529362                           |
| 425.3078481                                            | 0.87370149                              | 0.008955591                                           | 4.415824522                          |
| 945.5077213                                            | 0.868728423                             | 0.003160205                                           | 4.438057511                          |
| 789.0083229                                            | 0.834990237                             | 0.005606126                                           | 4.728779513                          |
| 314.7615984                                            | 0.894121326                             | 0.011313662                                           | 3.956456008                          |
| 351.383024                                             | 0.916537932                             | 0.007304347                                           | 4.631031319                          |
| 415.476479                                             | 0.883103019                             | 0.009777618                                           | 4.423153224                          |
| 331.985714                                             | 0.936285333                             | 0.008085252                                           | 4.724223234                          |
| 489.6872711                                            | 0.910295016                             | 0.005383161                                           | 4.560305505                          |
| 787.3192817                                            | 0.913245115                             | 0.003098977                                           | 4.55710218                           |
| 385.4522011                                            | 0.903153967                             | 0.00756207                                            | 4.420886465                          |
| 552.4761153                                            | 0.909513801                             | 0.004472961                                           | 4.551036636                          |
| 550.869711                                             | 0.898475702                             | 0.004928941                                           | 4.521052847                          |
| 237.1575618                                            | 0.880597015                             | 0.0142727                                             | 4.082496332                          |
| 335.0787954                                            | 0.921992226                             | 0.011290779                                           | 4.494408939                          |
| 262.5993513                                            | 0.876820665                             | 0.01426571                                            | 4.358043669                          |
| 669.9030039                                            | 0.918495673                             | 0.003844619                                           | 4.594825731                          |
| 402.3321639                                            | 0.93270657                              | 0.006601497                                           | 4.653270038                          |
| 284.7897921                                            | 0.910290507                             | 0.012139963                                           | 4.393752575                          |
| 250.9372144                                            | 0.907399666                             | 0.011460237                                           | 4.361040165                          |
| 440.4256824                                            | 0.916252169                             | 0.005571387                                           | 4.453853915                          |
| 705.6033735                                            | 0.8965286                               | 0.00374216                                            | 4.411291044                          |
| 477.3004127                                            | 0.918684035                             | 0.005144908                                           | 4.56855361                           |
| 633.9456522                                            | 0.89309071                              | 0.004818981                                           | 4.46356572                           |
| 398.8444113                                            | 0.907953697                             | 0.008207063                                           | 4.3923416                            |
| 686.5798913                                            | 0.89409683                              | 0.003830531                                           | 4.657953472                          |
| 475.0692668                                            | 0.869370154                             | 0.006713421                                           | 4.45811549                           |
| 550.4162954                                            | 0.900460962                             | 0.00606063                                            | 4.441674544                          |
| 557.5385564                                            | 0.905948948                             | 0.00467955                                            | 4.55150058                           |
| 756.3759108                                            | 0.898182625                             | 0.003062642                                           | 4.549251151                          |
| 172.8612309                                            | 0.897176241                             | 0.020312497                                           | 4.232541078                          |
| 740.3482565                                            | 0.873381668                             | 0.004258761                                           | 4.468396503                          |
| 660.9025198                                            | 0.862848042                             | 0.005438725                                           | 4.15243446                           |
| 624.2442326                                            | 0.897193846                             | 0.004163636                                           | 4.580191676                          |
| 579.1083266                                            | 0.910495003                             | 0.004185777                                           | 4.523484592                          |
| 456.6293848                                            | 0.871343632                             | 0.006304794                                           | 4.20091253                           |
| 413.6643037                                            | 0.901403446                             | 0.008148913                                           | 4.411776556                          |
| 591.3012816                                            | 0.885171239                             | 0.005536467                                           | 4.533095626                          |
| 791.9448193                                            | 0.895973268                             | 0.003508208                                           | 4.552322472                          |
| 460.9097579                                            | 0.926311847                             | 0.008430114                                           | 4.717971012                          |
| 340.0782485                                            | 0.92546004                              | 0.007924174                                           | 4.66147564                           |
| 580.1256697                                            | 0.893671902                             | 0.005535765                                           | 4.307263021                          |
| 362.8811427                                            | 0.882753307                             | 0.007360352                                           | 4.234609041                          |
| 314.8794586                                            | 0.880118837                             | 0.013770117                                           | 4.337212601                          |
| 376.107652                                             | 0.900094633                             | 0.007195265                                           | 4.279276165                          |
| 713.4565753                                            | 0.928371757                             | 0.003426034                                           | 4.683963434                          |
| 702.663891                                             | 0.925320029                             | 0.004901652                                           | 4.758582095                          |
| 348.139707                                             | 0.896609227                             | 0.010145421                                           | 4.555294848                          |
| 577.5120331                                            | 0.880650399                             | 0.00559208                                            | 4.536053049                          |
| 292.0558115                                            | 0.891887156                             | 0.009406183                                           | 4.233160757                          |
| 463.2458113                                            | 0.913772984                             | 0.006095813                                           | 4.638202619                          |
| 449.854273                                             | 0.829082145                             | 0.008410234                                           | 4.095597333                          |
| 540.7125317                                            | 0.901015965                             | 0.005963927                                           | 4.680541003                          |
| 486.8987073                                            | 0.892189867                             | 0.00569584                                            | 4.515319487                          |
| 454.424589                                             | 0.894335855                             | 0.006874147                                           | 4.313069713                          |
| 693.6240266                                            | 0.875631529                             | 0.004469088                                           | 4.393525399                          |
| 306.2886372                                            | 0.837423313                             | 0.011898631                                           | 4.124278458                          |
| 395.6254765                                            | 0.927339663                             | 0.006254738                                           | 4.539255581                          |
| 535.3785993                                            | 0.912494991                             | 0.004727246                                           | 4.566266895                          |
| 453.3818986                                            | 0.895617716                             | 0.007075371                                           | 4.459407942                          |
| 466.2007125                                            | 0.919541855                             | 0.004853118                                           | 4.457998002                          |
| 817.3376274                                            | 0.88515488                              | 0.004470202                                           | 4.662229519                          |
| 356.0589478                                            | 0.906720188                             | 0.007389046                                           | 4.464543502                          |
| 670.9990687                                            | 0.88031739                              | 0.00499835                                            | 4.305862879                          |
| 320.7482246                                            | 0.8816639                               | 0.009951879                                           | 4.078695731                          |
| 440.4710085                                            | 0.86345954                              | 0.007461842                                           | 4.394007166                          |

| log.sigma.2.5.mm.3D_gIrlm_HighGrayLevelRunEmphasis | log.sigma.2.5.mm.3D_gIrlm_RunLengthNonUniformityNormalized | log.sigma.2.5.mm.3D_gIrlm_GrayLevelVariance |
|----------------------------------------------------|------------------------------------------------------------|---------------------------------------------|
| 547.8941826                                        | 0.868041896                                                | 47.25334157                                 |
| 198.5635689                                        | 0.777132084                                                | 24.99399038                                 |
| 152.2121687                                        | 0.782318091                                                | 23.35105092                                 |
| 363.2588605                                        | 0.843704335                                                | 34.81901537                                 |
| 336.7026682                                        | 0.826348635                                                | 26.93659491                                 |
| 304.7466491                                        | 0.857842657                                                | 38.14035088                                 |
| 438.6011206                                        | 0.81518233                                                 | 27.743608                                   |
| 449.1484978                                        | 0.805108065                                                | 32.29167529                                 |
| 534.7615887                                        | 0.83351978                                                 | 28.73998188                                 |
| 343.2850829                                        | 0.846751984                                                | 27.44888889                                 |
| 183.4163999                                        | 0.827930417                                                | 18.21822183                                 |
| 510.0636395                                        | 0.839491874                                                | 34.53518716                                 |
| 294.6441418                                        | 0.726719602                                                | 29.89126108                                 |
| 713.9802371                                        | 0.829709813                                                | 45.33588099                                 |
| 437.8933035                                        | 0.845826938                                                | 39.54715387                                 |
| 349.9650188                                        | 0.806505976                                                | 30.86115247                                 |
| 241.6176622                                        | 0.850492796                                                | 24.4069444                                  |
| 189.5190609                                        | 0.763968499                                                | 24.51752896                                 |
| 179.8632839                                        | 0.801103761                                                | 15.60136005                                 |
| 409.310382                                         | 0.829405364                                                | 31.5529356                                  |
| 243.407832                                         | 0.739558238                                                | 20.92558352                                 |
| 194.3856207                                        | 0.832361101                                                | 17.05699673                                 |
| 279.5354052                                        | 0.817228582                                                | 25.67504581                                 |
| 223.3583436                                        | 0.823307292                                                | 20.30027767                                 |
| 500.625868                                         | 0.818943555                                                | 34.50067831                                 |
| 476.3730061                                        | 0.863252608                                                | 39.65447571                                 |
| 448.030911                                         | 0.836502078                                                | 37.50931062                                 |
| 419.2904724                                        | 0.8172                                                     | 30.139128                                   |
| 191.1027367                                        | 0.844207746                                                | 15.62924564                                 |
| 312.508743                                         | 0.80172461                                                 | 21.73408442                                 |
| 529.909214                                         | 0.803356515                                                | 31.87323492                                 |
| 308.5603608                                        | 0.78518265                                                 | 26.12697419                                 |
| 416.9311359                                        | 0.840300821                                                | 35.6688117                                  |
| 474.5722749                                        | 0.821617163                                                | 34.39040766                                 |
| 351.3730665                                        | 0.842628595                                                | 28.19120304                                 |
| 291.2966164                                        | 0.78708633                                                 | 27.42402994                                 |
| 617.4569279                                        | 0.77826469                                                 | 39.06964004                                 |
| 465.6273632                                        | 0.743372418                                                | 38.15942712                                 |
| 223.0914616                                        | 0.809316632                                                | 15.27439482                                 |
| 271.9819642                                        | 0.848895865                                                | 27.52460159                                 |
| 283.4247009                                        | 0.798017817                                                | 31.42000157                                 |
| 274.1598186                                        | 0.880162202                                                | 31.87627704                                 |
| 370.289518                                         | 0.837629766                                                | 28.42540522                                 |
| 592.4409256                                        | 0.84467452                                                 | 34.21956441                                 |
| 287.7246441                                        | 0.826017928                                                | 29.63834639                                 |
| 419.056144                                         | 0.83994476                                                 | 29.95637132                                 |
| 402.8594908                                        | 0.822001967                                                | 31.28405543                                 |
| 164.4238671                                        | 0.786068264                                                | 19.04672532                                 |
| 262.3951681                                        | 0.85599172                                                 | 29.22305399                                 |
| 182.7241693                                        | 0.788879794                                                | 22.41502339                                 |
| 519.6663519                                        | 0.852141747                                                | 34.50211114                                 |
| 325.05357                                          | 0.875120966                                                | 31.87936685                                 |
| 215.3092687                                        | 0.837425106                                                | 23.61694387                                 |
| 193.0183464                                        | 0.832465242                                                | 24.21589157                                 |
| 342.0311448                                        | 0.847897339                                                | 23.9156                                     |
| 509.4400363                                        | 0.814618153                                                | 29.25749185                                 |
| 369.4391094                                        | 0.852010909                                                | 30.19154731                                 |
| 444.4122079                                        | 0.806613995                                                | 32.89995156                                 |
| 296.6590204                                        | 0.833935671                                                | 30.41551064                                 |
| 490.6799688                                        | 0.820919674                                                | 30.67905295                                 |
| 317.5793043                                        | 0.78002974                                                 | 30.94785965                                 |
| 403.1419377                                        | 0.824728221                                                | 28.44481119                                 |
| 417.6314399                                        | 0.835433517                                                | 28.17164807                                 |
| 549.966018                                         | 0.819683081                                                | 29.70379051                                 |
| 126.565316                                         | 0.817013782                                                | 17.9375                                     |
| 497.3086439                                        | 0.784654891                                                | 33.35432239                                 |
| 422.4498884                                        | 0.768952783                                                | 24.99925813                                 |
| 448.5906666                                        | 0.819701514                                                | 31.96932843                                 |
| 432.5716158                                        | 0.838942863                                                | 28.26199408                                 |
| 306.2404027                                        | 0.778340996                                                | 21.77855793                                 |
| 301.5763937                                        | 0.826203217                                                | 23.88278537                                 |
| 416.4858357                                        | 0.800962967                                                | 35.89227132                                 |
| 569.2909153                                        | 0.818666729                                                | 35.47858521                                 |
| 361.6792226                                        | 0.866350622                                                | 39.64891471                                 |
| 271.6951279                                        | 0.863795251                                                | 29.75434489                                 |
| 406.9466151                                        | 0.812587981                                                | 28.55990306                                 |
| 253.8387338                                        | 0.795692115                                                | 20.05397656                                 |
| 218.7818768                                        | 0.791924368                                                | 30.11756487                                 |
| 274.7908584                                        | 0.821228156                                                | 21.56801537                                 |
| 566.8205587                                        | 0.867347514                                                | 35.62862164                                 |
| 549.3578633                                        | 0.86715894                                                 | 45.17558069                                 |
| 248.8348071                                        | 0.817842803                                                | 31.51960544                                 |
| 395.5051339                                        | 0.80083465                                                 | 29.97264928                                 |
| 206.6824981                                        | 0.806030746                                                | 16.34264848                                 |
| 348.0303903                                        | 0.847478851                                                | 30.40779806                                 |
| 258.7523089                                        | 0.721181866                                                | 16.37623887                                 |
| 389.2052448                                        | 0.826645404                                                | 35.8624068                                  |
| 351.1054851                                        | 0.814379789                                                | 27.77493236                                 |
| 323.6629434                                        | 0.815642988                                                | 23.67964283                                 |
| 464.5930933                                        | 0.78537943                                                 | 28.65926649                                 |
| 191.4553713                                        | 0.730998715                                                | 17.40277149                                 |
| 315.9798045                                        | 0.866888395                                                | 25.18384066                                 |
| 406.3908628                                        | 0.841706857                                                | 31.90057911                                 |
| 326.1239887                                        | 0.816821799                                                | 27.89898196                                 |
| 361.0604698                                        | 0.851538066                                                | 24.55290449                                 |
| 567.7976515                                        | 0.805750531                                                | 41.78734349                                 |
| 265.0350708                                        | 0.831872234                                                | 24.48207193                                 |
| 449.2400027                                        | 0.790938069                                                | 29.91922852                                 |
| 215.5809621                                        | 0.790878541                                                | 15.72014999                                 |
| 290.9076398                                        | 0.773094491                                                | 24.56618925                                 |



| log.sigma.2.5.mm.3D_glszm_SmallAreaHighGrayLevelEmphasis | log.sigma.2.5.mm.3D_glszm_GrayLevelNonUniformityNormalized | log.sigma.2.5.mm.3D_glszm_SizeZoneNonUniformityNormalized |
|----------------------------------------------------------|------------------------------------------------------------|-----------------------------------------------------------|
| 332.7969066                                              | 0.042917113                                                | 0.442159701                                               |
| 125.5394572                                              | 0.066845414                                                | 0.371995192                                               |
| 96.29935369                                              | 0.059538946                                                | 0.325128414                                               |
| 199.9248396                                              | 0.048875028                                                | 0.360106928                                               |
| 183.177589                                               | 0.055934935                                                | 0.366440484                                               |
| 200.9408506                                              | 0.048399508                                                | 0.360495537                                               |
| 265.9135713                                              | 0.054460903                                                | 0.349019327                                               |
| 277.2352649                                              | 0.051048693                                                | 0.381995682                                               |
| 307.9039303                                              | 0.053719634                                                | 0.367496495                                               |
| 198.1640152                                              | 0.055004444                                                | 0.366172444                                               |
| 105.4165258                                              | 0.067281637                                                | 0.354548773                                               |
| 321.233911                                               | 0.050665738                                                | 0.411986542                                               |
| 160.5683493                                              | 0.058276599                                                | 0.353574078                                               |
| 435.2235429                                              | 0.046201653                                                | 0.39772562                                                |
| 263.1354404                                              | 0.047891931                                                | 0.407061746                                               |
| 217.9846276                                              | 0.053058014                                                | 0.37423044                                                |
| 142.3237613                                              | 0.058104224                                                | 0.350477573                                               |
| 109.1475161                                              | 0.059562263                                                | 0.350328581                                               |
| 105.18091                                                | 0.073279547                                                | 0.330706263                                               |
| 253.0189429                                              | 0.051199025                                                | 0.365177127                                               |
| 138.2404152                                              | 0.06629222                                                 | 0.327668089                                               |
| 96.1649053                                               | 0.067303306                                                | 0.325938219                                               |
| 162.6481002                                              | 0.058617863                                                | 0.367139275                                               |
| 126.2660676                                              | 0.061677133                                                | 0.3210748                                                 |
| 302.8124855                                              | 0.054121304                                                | 0.372795506                                               |
| 308.4452059                                              | 0.045950274                                                | 0.380429344                                               |
| 282.9291737                                              | 0.046702565                                                | 0.392146762                                               |
| 255.8630042                                              | 0.053421396                                                | 0.385061583                                               |
| 115.6473491                                              | 0.0722462                                                  | 0.321261025                                               |
| 164.4242927                                              | 0.063403047                                                | 0.344783603                                               |
| 324.359575                                               | 0.053501271                                                | 0.388887751                                               |
| 165.6523622                                              | 0.059545168                                                | 0.366020609                                               |
| 256.2508304                                              | 0.047240138                                                | 0.390005041                                               |
| 273.7115605                                              | 0.050422504                                                | 0.37129298                                                |
| 215.4921139                                              | 0.054384646                                                | 0.367581827                                               |
| 183.1644608                                              | 0.057534362                                                | 0.380921551                                               |
| 369.6499468                                              | 0.049033754                                                | 0.391155207                                               |
| 299.3647526                                              | 0.048322897                                                | 0.372804266                                               |
| 108.8228671                                              | 0.077500469                                                | 0.308641396                                               |
| 159.7576623                                              | 0.052362019                                                | 0.322184953                                               |
| 161.99828                                                | 0.052762332                                                | 0.381757903                                               |
| 176.2108601                                              | 0.050007278                                                | 0.374232046                                               |
| 209.8816477                                              | 0.053555045                                                | 0.350904438                                               |
| 348.3589645                                              | 0.049801143                                                | 0.403303184                                               |
| 173.4300428                                              | 0.052803439                                                | 0.359084052                                               |
| 271.9624029                                              | 0.052138972                                                | 0.401268946                                               |
| 245.6196667                                              | 0.051528195                                                | 0.371218213                                               |
| 92.01158215                                              | 0.069918784                                                | 0.325124948                                               |
| 164.9086591                                              | 0.053590085                                                | 0.37112404                                                |
| 111.1622362                                              | 0.063969704                                                | 0.356489196                                               |
| 311.5556451                                              | 0.051802483                                                | 0.383640716                                               |
| 200.6902334                                              | 0.049998619                                                | 0.385326584                                               |
| 125.3320851                                              | 0.058119075                                                | 0.370685906                                               |
| 130.4632123                                              | 0.057724391                                                | 0.35816898                                                |
| 204.3256111                                              | 0.057925926                                                | 0.348819753                                               |
| 293.0791788                                              | 0.055399565                                                | 0.364473889                                               |
| 214.2894094                                              | 0.05062686                                                 | 0.376121801                                               |
| 247.477791                                               | 0.053586957                                                | 0.342696125                                               |
| 162.1016373                                              | 0.05221591                                                 | 0.365937083                                               |
| 301.8831486                                              | 0.051665215                                                | 0.372045756                                               |
| 201.5051907                                              | 0.052847177                                                | 0.397922097                                               |
| 238.5294514                                              | 0.055511259                                                | 0.384817874                                               |
| 252.2066057                                              | 0.053880286                                                | 0.384160375                                               |
| 333.2201589                                              | 0.052175981                                                | 0.342995904                                               |
| 64.40886207                                              | 0.069401578                                                | 0.279278121                                               |
| 299.9856145                                              | 0.05167051                                                 | 0.35433287                                                |
| 235.5038016                                              | 0.062819576                                                | 0.39848886                                                |
| 270.918968                                               | 0.051260727                                                | 0.366581018                                               |
| 245.251661                                               | 0.053596036                                                | 0.390060562                                               |
| 171.1623223                                              | 0.061798349                                                | 0.355961383                                               |
| 168.6956833                                              | 0.060180664                                                | 0.344848633                                               |
| 248.2724348                                              | 0.05027953                                                 | 0.375539904                                               |
| 346.2810333                                              | 0.050556906                                                | 0.371193206                                               |
| 219.8797099                                              | 0.044415008                                                | 0.428581191                                               |
| 173.4261912                                              | 0.05086772                                                 | 0.364881265                                               |
| 207.3042567                                              | 0.058651949                                                | 0.334839429                                               |
| 160.4701652                                              | 0.064692628                                                | 0.362431758                                               |
| 125.6526185                                              | 0.05598789                                                 | 0.338391973                                               |
| 158.3377745                                              | 0.063962152                                                | 0.35954057                                                |
| 346.1530169                                              | 0.049799137                                                | 0.381040848                                               |
| 348.661451                                               | 0.044167921                                                | 0.453859459                                               |
| 154.7466955                                              | 0.051023786                                                | 0.413354867                                               |
| 240.202411                                               | 0.053408171                                                | 0.371346115                                               |
| 106.4913024                                              | 0.069502553                                                | 0.28167178                                                |
| 204.4334848                                              | 0.051221827                                                | 0.384710813                                               |
| 117.8485355                                              | 0.077779374                                                | 0.273089629                                               |
| 226.209873                                               | 0.04791497                                                 | 0.381818855                                               |
| 207.288763                                               | 0.054438958                                                | 0.373653207                                               |
| 186.872049                                               | 0.062436573                                                | 0.345337987                                               |
| 259.7579936                                              | 0.056163194                                                | 0.356467014                                               |
| 116.9904634                                              | 0.078348357                                                | 0.325501101                                               |
| 189.9516836                                              | 0.056679105                                                | 0.368373008                                               |
| 245.016663                                               | 0.050265861                                                | 0.371974507                                               |
| 189.2752728                                              | 0.055434677                                                | 0.374436212                                               |
| 208.9349039                                              | 0.056691251                                                | 0.362567142                                               |
| 365.1609966                                              | 0.046435222                                                | 0.410874881                                               |
| 147.8688405                                              | 0.05694655                                                 | 0.323993023                                               |
| 248.3041762                                              | 0.055250679                                                | 0.421040013                                               |
| 107.1607974                                              | 0.078374669                                                | 0.31384178                                                |
| 182.7974033                                              | 0.058467566                                                | 0.378170998                                               |

| log.sigma.2.5.mm.3D_glszm_SizeZoneNonUniformity | log.sigma.2.5.mm.3D_glszm_GrayLevelNonUniformity | log.sigma.2.5.mm.3D_glszm_LargeAreaEmphasis | log.sigma.2.5.mm.3D_glszm_ZoneVariance |
|-------------------------------------------------|--------------------------------------------------|---------------------------------------------|----------------------------------------|
| 399.2702104                                     | 38.75415282                                      | 30.6910299                                  | 25.16879014                            |
| 77.375                                          | 13.90384615                                      | 302.8221154                                 | 282.6153615                            |
| 120.6226415                                     | 22.08894879                                      | 146.7708895                                 | 129.6745592                            |
| 120.6358209                                     | 16.37313433                                      | 53.50746269                                 | 45.00196926                            |
| 272.6317204                                     | 41.6155914                                       | 109.9193548                                 | 99.78916638                            |
| 82.19298246                                     | 11.03508772                                      | 50.55263158                                 | 42.17313019                            |
| 592.2857985                                     | 92.42015321                                      | 242.4213318                                 | 231.332471                             |
| 536.3219373                                     | 71.67236467                                      | 372.8062678                                 | 359.5699386                            |
| 544.9973028                                     | 79.66621713                                      | 66.27376939                                 | 56.87704344                            |
| 137.3146667                                     | 20.62666667                                      | 47.26933333                                 | 39.09735822                            |
| 156.3560091                                     | 29.67120181                                      | 89.95011338                                 | 78.25712537                            |
| 322.997449                                      | 39.72193878                                      | 72.30229592                                 | 63.65839592                            |
| 130.4688347                                     | 21.50406504                                      | 1066.626016                                 | 1041.026256                            |
| 218.7490909                                     | 25.41090909                                      | 153.7109091                                 | 143.9651603                            |
| 282.9079137                                     | 33.28489209                                      | 83.14532374                                 | 74.9961472                             |
| 459.9292107                                     | 65.20829943                                      | 356.4621644                                 | 343.784161                             |
| 145.4481928                                     | 24.11325301                                      | 30.18313253                                 | 21.90537959                            |
| 93.8880597                                      | 15.96268657                                      | 345.3171642                                 | 324.150298                             |
| 105.4952978                                     | 23.37617555                                      | 181.3103448                                 | 164.7538644                            |
| 590.1262376                                     | 82.73762376                                      | 99.41769802                                 | 89.06730307                            |
| 184.1494662                                     | 37.25622776                                      | 1211.44484                                  | 1182.492015                            |
| 104.6261682                                     | 21.60436137                                      | 49.06853583                                 | 37.76972273                            |
| 105.7361111                                     | 16.88194444                                      | 128.6458333                                 | 116.003858                             |
| 245.6222222                                     | 47.18300654                                      | 90.27581699                                 | 78.3033124                             |
| 142.7806789                                     | 20.72845953                                      | 134.2898172                                 | 123.2424381                            |
| 339.7234043                                     | 41.03359462                                      | 57.34042553                                 | 50.302783                              |
| 433.3221719                                     | 51.60633484                                      | 125.9683258                                 | 117.4080678                            |
| 321.9114833                                     | 44.66028708                                      | 222.8373206                                 | 211.9220428                            |
| 46.90410959                                     | 10.54794521                                      | 38.67808219                                 | 29.30441922                            |
| 168.599182                                      | 31.00408998                                      | 144.8261759                                 | 127.1827401                            |
| 515.6651584                                     | 70.94268477                                      | 528.1809955                                 | 515.3055629                            |
| 190.696737                                      | 31.02303263                                      | 477.4606526                                 | 461.69015                              |
| 435.6356312                                     | 52.76723366                                      | 84.96060877                                 | 76.60400629                            |
| 279.9549072                                     | 38.01856764                                      | 96.31830239                                 | 86.60441571                            |
| 556.8864686                                     | 82.39273927                                      | 67.43234323                                 | 58.98209718                            |
| 299.7852605                                     | 45.27954257                                      | 381.3354511                                 | 366.814219                             |
| 350.8662207                                     | 43.98327759                                      | 646.212932                                  | 629.0047713                            |
| 473.4614173                                     | 61.37007874                                      | 623.3173228                                 | 606.8030188                            |
| 90.12328767                                     | 22.63013699                                      | 113.3356164                                 | 95.5919028                             |
| 780.3319571                                     | 126.8208092                                      | 36.55078448                                 | 27.54087258                            |
| 258.8318584                                     | 35.77286136                                      | 433.3569322                                 | 418.7189722                            |
| 623.4705882                                     | 83.31212485                                      | 13.82172869                                 | 8.434091404                            |
| 418.9798995                                     | 63.94472362                                      | 69.11306533                                 | 59.75274544                            |
| 352.8902857                                     | 43.576                                           | 93.75314286                                 | 85.66805682                            |
| 136.8110236                                     | 20.11811024                                      | 79.09186352                                 | 67.84032901                            |
| 379.6004228                                     | 49.32346723                                      | 106.9143763                                 | 98.49456374                            |
| 506.3416422                                     | 70.28445748                                      | 278                                         | 266.8138195                            |
| 63.7244898                                      | 13.70408163                                      | 221.9234694                                 | 202.1754217                            |
| 119.873065                                      | 17.30959752                                      | 25.18575851                                 | 18.24424657                            |
| 119.4238806                                     | 21.42985075                                      | 241.7850746                                 | 225.4972243                            |
| 339.5220339                                     | 45.84519774                                      | 80.28135593                                 | 71.85496377                            |
| 548.7050562                                     | 71.19803371                                      | 18.10463483                                 | 12.50064258                            |
| 524.8912429                                     | 82.29661017                                      | 139.5127119                                 | 129.3593077                            |
| 119.2702703                                     | 19.22222222                                      | 87.27927928                                 | 76.28796364                            |
| 156.9688889                                     | 26.06666667                                      | 41.06222222                                 | 32.32691358                            |
| 202.647482                                      | 30.80215827                                      | 160.9892086                                 | 148.6887972                            |
| 534.0929577                                     | 71.89014085                                      | 55.96126761                                 | 47.84679379                            |
| 315.2804348                                     | 49.3                                             | 251.0826087                                 | 236.9548157                            |
| 191.0191571                                     | 27.25670498                                      | 80.55172414                                 | 70.58451872                            |
| 1074.468144                                     | 149.2091413                                      | 159.591759                                  | 149.599768                             |
| 198.5631263                                     | 26.37074148                                      | 364.3406814                                 | 351.8156072                            |
| 317.8595642                                     | 45.85230024                                      | 211.8232446                                 | 201.3745405                            |
| 756.7959391                                     | 106.1441624                                      | 107.4654822                                 | 98.83023757                            |
| 746.016092                                      | 113.4827586                                      | 93.45057471                                 | 81.1667583                             |
| 60.32407407                                     | 14.99074074                                      | 80.0462963                                  | 66.6696735                             |
| 346.1832139                                     | 50.48208802                                      | 512.1944729                                 | 496.5689193                            |
| 117.9527027                                     | 18.59459459                                      | 457.3918919                                 | 437.9842951                            |
| 676.708559                                      | 94.62730228                                      | 179.4940412                                 | 168.0310848                            |
| 753.9870667                                     | 103.6011381                                      | 141.2576306                                 | 132.0766993                            |
| 229.2391304                                     | 39.79813665                                      | 523.0869565                                 | 502.8369565                            |
| 132.421875                                      | 23.109375                                        | 85.1171875                                  | 73.67376709                            |
| 415.7226739                                     | 55.65943993                                      | 384.2023487                                 | 369.1840982                            |
| 258.7216643                                     | 35.23816356                                      | 132.6700143                                 | 121.9788971                            |
| 401.5805763                                     | 41.61686233                                      | 43.42902882                                 | 37.61665845                            |
| 436.3979933                                     | 60.83779264                                      | 39.80351171                                 | 32.95014807                            |
| 125.2299465                                     | 21.93582888                                      | 79.39037433                                 | 65.61494181                            |
| 208.3982609                                     | 37.19826087                                      | 262.8521739                                 | 245.4886473                            |
| 76.81497797                                     | 12.7092511                                       | 235.5066079                                 | 217.695977                             |
| 180.8489066                                     | 32.17296223                                      | 119.333996                                  | 107.817216                             |
| 348.2713348                                     | 45.51641138                                      | 28.1214442                                  | 21.57254883                            |
| 383.5112426                                     | 37.32189349                                      | 31.90887574                                 | 26.36828402                            |
| 244.7060811                                     | 30.20608108                                      | 137.3766892                                 | 128.1420717                            |
| 342.009772                                      | 49.18892508                                      | 332.4636265                                 | 319.8653661                            |
| 200.2686357                                     | 49.41631505                                      | 161.0168776                                 | 142.3364885                            |
| 325.850059                                      | 43.38488784                                      | 50.80637544                                 | 42.51442343                            |
| 64.44915254                                     | 18.3559322                                       | 1098.338983                                 | 1056.199081                            |
| 319.9642005                                     | 40.15274463                                      | 130.3997613                                 | 122.2996921                            |
| 303.4064039                                     | 44.2044335                                       | 249.7561576                                 | 238.35306                              |
| 138.8258706                                     | 25.09950249                                      | 110.3432836                                 | 97.08064157                            |
| 171.1041667                                     | 26.95833333                                      | 225.84375                                   | 208.0458984                            |
| 82.35177866                                     | 19.82213439                                      | 746.2371542                                 | 719.6718899                            |
| 339.6399132                                     | 52.25813449                                      | 20.51843818                                 | 13.84389307                            |
| 659.1388262                                     | 89.07110609                                      | 68.34819413                                 | 59.79289926                            |
| 362.8286894                                     | 53.71620227                                      | 160.4396285                                 | 148.8417027                            |
| 552.1897571                                     | 86.34077479                                      | 45.66250821                                 | 37.49709876                            |
| 422.3793774                                     | 47.73540856                                      | 257.0758755                                 | 245.9950075                            |
| 277.986014                                      | 48.86013986                                      | 76.55594406                                 | 65.77643161                            |
| 115.3649635                                     | 15.13868613                                      | 182.3686131                                 | 167.7672891                            |
| 63.3960396                                      | 15.83168317                                      | 109.7821782                                 | 92.73590824                            |
| 537.0028169                                     | 83.02394366                                      | 583.9394366                                 | 567.4054771                            |

| log.sigma.2.5.mm.3D_glszm_ZonePercentage | log.sigma.2.5.mm.3D_glszm_LargeAreaLowGrayLevelEmphasis | log.sigma.2.5.mm.3D_glszm_LargeAreaHighGrayLevelEmphasis | log.sigma.2.5.mm.3D_glszm_HighGrayLevelZoneEmphasis |
|------------------------------------------|---------------------------------------------------------|----------------------------------------------------------|-----------------------------------------------------|
| 0.425541942                              | 0.067552354                                             | 17045.86711                                              | 506.0099668                                         |
| 0.222459893                              | 1.732819575                                             | 54396.45192                                              | 203.8846154                                         |
| 0.241851369                              | 1.398106288                                             | 17448.8248                                               | 165.2884097                                         |
| 0.342886387                              | 0.154220987                                             | 21023.65075                                              | 331.8925373                                         |
| 0.314189189                              | 0.348568608                                             | 36509.61559                                              | 311.9744624                                         |
| 0.345454545                              | 0.216820064                                             | 12906.07895                                              | 327.1403509                                         |
| 0.300300832                              | 0.654556078                                             | 90960.46317                                              | 444.3653506                                         |
| 0.27486296                               | 0.932144129                                             | 150815.2991                                              | 448.8411681                                         |
| 0.326220853                              | 0.131757423                                             | 34818.38975                                              | 511.8503034                                         |
| 0.349813433                              | 0.164901438                                             | 15474.21333                                              | 332.5333333                                         |
| 0.292440318                              | 0.583616922                                             | 14964.17234                                              | 174.6099773                                         |
| 0.340130152                              | 0.156915162                                             | 34731.74617                                              | 497.7729592                                         |
| 0.197643278                              | 4.049698142                                             | 283876.4661                                              | 288.3252033                                         |
| 0.32032615                               | 0.232411922                                             | 104800.3418                                              | 689.9418182                                         |
| 0.350302419                              | 0.210737675                                             | 34417.83885                                              | 417.4719424                                         |
| 0.280850091                              | 1.179671697                                             | 109863.1587                                              | 356.5329536                                         |
| 0.347571189                              | 0.155112886                                             | 7250.084337                                              | 237.0746988                                         |
| 0.217356042                              | 2.130935837                                             | 57483.78731                                              | 232.6455224                                         |
| 0.245762712                              | 1.174793155                                             | 29070.07837                                              | 178.6238245                                         |
| 0.310829006                              | 0.275142425                                             | 37145.79146                                              | 413.3248762                                         |
| 0.185846561                              | 5.784938695                                             | 256760.2046                                              | 244.2206406                                         |
| 0.297497683                              | 0.286944939                                             | 9224.109034                                              | 180.3551402                                         |
| 0.28125                                  | 0.535119567                                             | 32274.78472                                              | 273.1909722                                         |
| 0.289006422                              | 0.492550613                                             | 17915.31242                                              | 223.6888889                                         |
| 0.300864101                              | 0.312407902                                             | 60944.96606                                              | 506.6266319                                         |
| 0.376952301                              | 0.140377102                                             | 25015.71333                                              | 486.0324748                                         |
| 0.341787813                              | 0.323691219                                             | 50728.64977                                              | 446.5004525                                         |
| 0.302679218                              | 0.590781937                                             | 85510.8433                                               | 411.5095694                                         |
| 0.326621924                              | 0.265628936                                             | 6213.945205                                              | 202.7191781                                         |
| 0.238072055                              | 0.470279184                                             | 45868.29652                                              | 288.7791411                                         |
| 0.278688525                              | 1.117045238                                             | 251883.5098                                              | 522.0648567                                         |
| 0.25181247                               | 1.555417066                                             | 148599.858                                               | 280.8387716                                         |
| 0.345927532                              | 0.216996967                                             | 35302.5103                                               | 404.157649                                          |
| 0.320851064                              | 0.230168638                                             | 42156.16844                                              | 454.096817                                          |
| 0.34400545                               | 0.230784471                                             | 20955.61848                                              | 350.5062706                                         |
| 0.262420807                              | 1.619386446                                             | 91953.44473                                              | 299.9047014                                         |
| 0.24106423                               | 1.072061571                                             | 391820.631                                               | 594.7569677                                         |
| 0.246076342                              | 1.521502005                                             | 258972.9937                                              | 482.8047244                                         |
| 0.237398374                              | 0.504290869                                             | 28277.11986                                              | 199.0068493                                         |
| 0.333149931                              | 0.167012571                                             | 9363.117258                                              | 275.9318745                                         |
| 0.261372398                              | 1.527325209                                             | 126490.9838                                              | 261.7610619                                         |
| 0.430824929                              | 0.07304577                                              | 3633.630852                                              | 278.1740696                                         |
| 0.32685464                               | 0.216568657                                             | 23420.43719                                              | 357.6624791                                         |
| 0.351688103                              | 0.158740995                                             | 56841.13371                                              | 552.1851429                                         |
| 0.298122066                              | 0.329698681                                             | 20071.39108                                              | 293.167979                                          |
| 0.344626594                              | 0.30094453                                              | 39141.86469                                              | 422.7167019                                         |
| 0.29899167                               | 0.796954539                                             | 98663.47581                                              | 402.7785924                                         |
| 0.225028703                              | 1.506524189                                             | 33833.76531                                              | 165.3826531                                         |
| 0.379553467                              | 0.122917475                                             | 6413.390093                                              | 257.9535604                                         |
| 0.247781065                              | 1.86096877                                              | 32988.92836                                              | 190.0208955                                         |
| 0.34449202                               | 0.179439927                                             | 37532.57966                                              | 505.8090395                                         |
| 0.42242658                               | 0.068183407                                             | 5848.432584                                              | 315.2956461                                         |
| 0.313829787                              | 0.731767723                                             | 28538.12006                                              | 207.3764124                                         |
| 0.301630435                              | 0.615671876                                             | 13278.31231                                              | 210.5015015                                         |
| 0.338345865                              | 0.146399778                                             | 12473.75333                                              | 346.2377778                                         |
| 0.285128205                              | 0.326822906                                             | 80847.05755                                              | 486.4172662                                         |
| 0.35105068                               | 0.169225935                                             | 19663.80493                                              | 354.1408451                                         |
| 0.26604974                               | 0.600844514                                             | 107507.0109                                              | 424.2945652                                         |
| 0.316747573                              | 0.293843987                                             | 23424.24904                                              | 277.302682                                          |
| 0.316354475                              | 0.387961359                                             | 67868.70118                                              | 484.4664127                                         |
| 0.282559456                              | 1.312044539                                             | 102454.6573                                              | 319.743487                                          |
| 0.309363296                              | 0.59468257                                              | 77481.4322                                               | 388.433414                                          |
| 0.34030057                               | 0.297604367                                             | 40237.20609                                              | 411.5162437                                         |
| 0.28532074                               | 0.185540533                                             | 48617.97379                                              | 555.8735632                                         |
| 0.273417722                              | 0.848327641                                             | 8517.476852                                              | 126.4444444                                         |
| 0.252977732                              | 1.142825748                                             | 231426.7369                                              | 501.9416581                                         |
| 0.226993865                              | 1.073001838                                             | 197617.0169                                              | 383.5641892                                         |
| 0.29536                                  | 0.418764757                                             | 78666.6831                                               | 437.6229686                                         |
| 0.33003244                               | 0.339043012                                             | 60431.27522                                              | 397.6254527                                         |
| 0.222222222                              | 1.890275502                                             | 146399.9674                                              | 297.6273292                                         |
| 0.295612009                              | 0.315695182                                             | 24996.57031                                              | 288.1145833                                         |
| 0.258041958                              | 1.067082313                                             | 140469.598                                               | 416.0542005                                         |
| 0.305835893                              | 0.251638129                                             | 71596.69727                                              | 557.4404591                                         |
| 0.414785303                              | 0.136037943                                             | 15975.15582                                              | 337.018143                                          |
| 0.381986586                              | 0.18016224                                              | 10052.59615                                              | 278.027592                                          |
| 0.278688525                              | 0.196783446                                             | 33855.86631                                              | 368.0454545                                         |
| 0.239983306                              | 1.231666724                                             | 57364.68522                                              | 262.4382609                                         |
| 0.236951983                              | 1.273456895                                             | 45552.96035                                              | 219.1497797                                         |
| 0.29466901                               | 0.475277742                                             | 30974.13917                                              | 265.499006                                          |
| 0.390765284                              | 0.052750854                                             | 17052.88293                                              | 548.547046                                          |
| 0.424836601                              | 0.066244926                                             | 17640.4426                                               | 515.2698225                                         |
| 0.329071707                              | 0.578742273                                             | 34307.19932                                              | 235.6908784                                         |
| 0.281737534                              | 0.980803643                                             | 114478.4593                                              | 394.7785016                                         |
| 0.231369997                              | 0.807007286                                             | 34072.95921                                              | 198.2320675                                         |
| 0.347273473                              | 0.156316697                                             | 18136.57615                                              | 328.1841795                                         |
| 0.154046997                              | 4.604092251                                             | 264864.3432                                              | 242.2669492                                         |
| 0.351362683                              | 0.339393221                                             | 52046.13246                                              | 367.2935561                                         |
| 0.296134209                              | 0.882956084                                             | 72246.18842                                              | 347.841133                                          |
| 0.274590164                              | 0.387101523                                             | 33171.70896                                              | 315.9875622                                         |
| 0.237037037                              | 0.517780049                                             | 100810.2771                                              | 439.14375                                           |
| 0.194018405                              | 4.902243535                                             | 115163.6759                                              | 212.8498024                                         |
| 0.387069689                              | 0.083094792                                             | 6085.616052                                              | 312.4164859                                         |
| 0.341886938                              | 0.181504031                                             | 27130.50564                                              | 394.7471783                                         |
| 0.293636364                              | 0.56102256                                              | 47587.41383                                              | 310.8606811                                         |
| 0.349954044                              | 0.12848154                                              | 17504.99278                                              | 345.5108339                                         |
| 0.300409117                              | 0.523141619                                             | 129445.9874                                              | 562.1420233                                         |
| 0.30457934                               | 0.296971961                                             | 21101.88462                                              | 258.5221445                                         |
| 0.261700096                              | 0.40589793                                              | 84187.84672                                              | 390.0875912                                         |
| 0.242206235                              | 0.503913874                                             | 25298.30693                                              | 189.7772277                                         |
| 0.245930031                              | 2.451771293                                             | 141000.4958                                              | 300.2197183                                         |

| log.sigma.2.5.mm.3D_glszm_SmallAreaEmphasis | log.sigma.2.5.mm.3D_glszm_LowGrayLevelZoneEmphasis | log.sigma.2.5.mm.3D_glszm_ZoneEntropy | log.sigma.2.5.mm.3D_glszm_SmallAreaLowGrayLevelEmphasis |
|---------------------------------------------|----------------------------------------------------|---------------------------------------|---------------------------------------------------------|
| 0.691362172                                 | 0.007832842                                        | 6.342622119                           | 0.006094514                                             |
| 0.633206294                                 | 0.019241461                                        | 5.816146229                           | 0.016263116                                             |
| 0.590190565                                 | 0.0286468                                          | 6.218901191                           | 0.018081935                                             |
| 0.620562577                                 | 0.010515099                                        | 6.216040276                           | 0.00866806                                              |
| 0.628071283                                 | 0.008853761                                        | 6.316518567                           | 0.006223342                                             |
| 0.620808147                                 | 0.010821998                                        | 6.081527802                           | 0.008991199                                             |
| 0.611730868                                 | 0.003944753                                        | 6.493358437                           | 0.002869948                                             |
| 0.642115353                                 | 0.00439448                                         | 6.464738992                           | 0.003398691                                             |
| 0.628801604                                 | 0.003478104                                        | 6.454686043                           | 0.002633399                                             |
| 0.626429114                                 | 0.008446135                                        | 6.056865744                           | 0.004894756                                             |
| 0.617595393                                 | 0.014542424                                        | 6.023156467                           | 0.010257791                                             |
| 0.666220605                                 | 0.004573086                                        | 6.279838081                           | 0.003631333                                             |
| 0.616148328                                 | 0.013985936                                        | 6.156849629                           | 0.011408082                                             |
| 0.655261942                                 | 0.006348302                                        | 6.355688372                           | 0.005774367                                             |
| 0.662228965                                 | 0.006854995                                        | 6.286209647                           | 0.005645477                                             |
| 0.634468033                                 | 0.008271314                                        | 6.394188209                           | 0.006460892                                             |
| 0.612321662                                 | 0.011275771                                        | 6.135468845                           | 0.007683356                                             |
| 0.614328445                                 | 0.018529757                                        | 5.999922662                           | 0.015639668                                             |
| 0.59565893                                  | 0.012397227                                        | 5.919177092                           | 0.009314465                                             |
| 0.626961958                                 | 0.004809082                                        | 6.558548589                           | 0.0035952                                               |
| 0.592895947                                 | 0.008874141                                        | 6.1892531                             | 0.006440197                                             |
| 0.590421694                                 | 0.013011928                                        | 6.010079                              | 0.010164329                                             |
| 0.628383353                                 | 0.010700792                                        | 5.959917407                           | 0.008792031                                             |
| 0.585392586                                 | 0.009834692                                        | 6.34465198                            | 0.005835565                                             |
| 0.632858272                                 | 0.007063252                                        | 6.193617096                           | 0.004293675                                             |
| 0.639562054                                 | 0.004961146                                        | 6.517966927                           | 0.003713591                                             |
| 0.65020952                                  | 0.004784805                                        | 6.478425962                           | 0.003701588                                             |
| 0.64329558                                  | 0.005380862                                        | 6.280651216                           | 0.004163775                                             |
| 0.583866137                                 | 0.013974176                                        | 5.602830662                           | 0.011500364                                             |
| 0.60966312                                  | 0.007752261                                        | 6.236331809                           | 0.006098614                                             |
| 0.647888655                                 | 0.003729971                                        | 6.387928761                           | 0.00290644                                              |
| 0.626998038                                 | 0.009745851                                        | 6.120364211                           | 0.007487651                                             |
| 0.648010231                                 | 0.005709417                                        | 6.465727097                           | 0.004327773                                             |
| 0.632526031                                 | 0.005706362                                        | 6.371470247                           | 0.004461689                                             |
| 0.628682962                                 | 0.006270518                                        | 6.433075041                           | 0.004661926                                             |
| 0.641260257                                 | 0.009876024                                        | 6.229512065                           | 0.006963096                                             |
| 0.650090269                                 | 0.00367493                                         | 6.473818043                           | 0.002988429                                             |
| 0.633431794                                 | 0.006034378                                        | 6.541842084                           | 0.004815103                                             |
| 0.575439567                                 | 0.015025641                                        | 5.954258714                           | 0.009551041                                             |
| 0.5866316                                   | 0.007244645                                        | 6.708092243                           | 0.004910442                                             |
| 0.641511872                                 | 0.013078547                                        | 6.294721682                           | 0.00913268                                              |
| 0.634269075                                 | 0.008323749                                        | 6.487221984                           | 0.006018949                                             |
| 0.614488403                                 | 0.006199933                                        | 6.482334356                           | 0.00465047                                              |
| 0.659158729                                 | 0.003692453                                        | 6.299190526                           | 0.002929879                                             |
| 0.620456976                                 | 0.010234466                                        | 6.198159559                           | 0.008532757                                             |
| 0.658341233                                 | 0.004723939                                        | 6.28423749                            | 0.003648627                                             |
| 0.633025141                                 | 0.005080064                                        | 6.508071801                           | 0.003332941                                             |
| 0.590692933                                 | 0.022728409                                        | 5.823929772                           | 0.019052127                                             |
| 0.631850512                                 | 0.016637738                                        | 6.104971756                           | 0.013800527                                             |
| 0.618604412                                 | 0.020101396                                        | 6.038799213                           | 0.017041286                                             |
| 0.643276358                                 | 0.004769166                                        | 6.387695793                           | 0.003806127                                             |
| 0.644206042                                 | 0.007424648                                        | 6.446208157                           | 0.005410436                                             |
| 0.631822184                                 | 0.015766369                                        | 6.303370748                           | 0.011597773                                             |
| 0.61998983                                  | 0.01392281                                         | 6.122557362                           | 0.011190845                                             |
| 0.61126837                                  | 0.006434408                                        | 6.159099547                           | 0.005041712                                             |
| 0.626335691                                 | 0.004824981                                        | 6.229125053                           | 0.003935824                                             |
| 0.636570117                                 | 0.005992398                                        | 6.443426509                           | 0.004640582                                             |
| 0.605565588                                 | 0.005257329                                        | 6.503152053                           | 0.003095404                                             |
| 0.626807322                                 | 0.013029168                                        | 6.274732888                           | 0.011264332                                             |
| 0.632839466                                 | 0.003569363                                        | 6.562675076                           | 0.002490704                                             |
| 0.654829606                                 | 0.007372385                                        | 6.136947852                           | 0.005955675                                             |
| 0.644699296                                 | 0.00794976                                         | 6.286997458                           | 0.00587153                                              |
| 0.643198704                                 | 0.004520359                                        | 6.35397575                            | 0.00295355                                              |
| 0.607162532                                 | 0.002895349                                        | 6.675410059                           | 0.00201353                                              |
| 0.53912961                                  | 0.025048932                                        | 5.974541957                           | 0.017238515                                             |
| 0.617662077                                 | 0.005221347                                        | 6.538376177                           | 0.004184217                                             |
| 0.656465939                                 | 0.008452167                                        | 5.890284635                           | 0.007240189                                             |
| 0.628268547                                 | 0.004350851                                        | 6.563568487                           | 0.003062102                                             |
| 0.648709879                                 | 0.004656625                                        | 6.412973761                           | 0.003438825                                             |
| 0.617840024                                 | 0.00729973                                         | 6.161154239                           | 0.005813674                                             |
| 0.609441497                                 | 0.009489267                                        | 6.19447655                            | 0.005655816                                             |
| 0.636643119                                 | 0.008291358                                        | 6.495999208                           | 0.007247415                                             |
| 0.632022447                                 | 0.004274771                                        | 6.437562501                           | 0.003416739                                             |
| 0.679360135                                 | 0.011420712                                        | 6.267613359                           | 0.009120637                                             |
| 0.623684109                                 | 0.00798472                                         | 6.418973765                           | 0.005389557                                             |
| 0.597885075                                 | 0.008630253                                        | 6.217824993                           | 0.007265359                                             |
| 0.62520415                                  | 0.00761854                                         | 6.147645127                           | 0.005777839                                             |
| 0.603112517                                 | 0.021529683                                        | 6.124810609                           | 0.015162617                                             |
| 0.621875696                                 | 0.008781373                                        | 6.089140857                           | 0.006798563                                             |
| 0.640449569                                 | 0.00399799                                         | 6.42817134                            | 0.003122912                                             |
| 0.700683782                                 | 0.006667907                                        | 6.292125662                           | 0.005754859                                             |
| 0.668195924                                 | 0.012433111                                        | 6.146943962                           | 0.009324222                                             |
| 0.632565289                                 | 0.00678434                                         | 6.384739764                           | 0.005583868                                             |
| 0.543486171                                 | 0.009921226                                        | 6.352292794                           | 0.006076521                                             |
| 0.644699841                                 | 0.006962347                                        | 6.379568673                           | 0.005077383                                             |
| 0.531747575                                 | 0.010001544                                        | 6.025027347                           | 0.007816826                                             |
| 0.640011833                                 | 0.007380773                                        | 6.377667754                           | 0.005862467                                             |
| 0.634293389                                 | 0.006231654                                        | 6.28101737                            | 0.004823205                                             |
| 0.608987329                                 | 0.008825915                                        | 6.165822821                           | 0.006652486                                             |
| 0.619494633                                 | 0.005667273                                        | 6.287423855                           | 0.004365099                                             |
| 0.588634509                                 | 0.010744006                                        | 5.754852822                           | 0.00816977                                              |
| 0.630193592                                 | 0.006692545                                        | 6.324182486                           | 0.004969217                                             |
| 0.632757324                                 | 0.005129646                                        | 6.513739956                           | 0.003679712                                             |
| 0.635675556                                 | 0.009309313                                        | 6.386873202                           | 0.007277687                                             |
| 0.624663813                                 | 0.005230838                                        | 6.393602831                           | 0.003822126                                             |
| 0.666276703                                 | 0.005340146                                        | 6.456030329                           | 0.003778023                                             |
| 0.58621108                                  | 0.008061695                                        | 6.434848825                           | 0.005541835                                             |
| 0.674589699                                 | 0.007617837                                        | 5.774023469                           | 0.006558075                                             |
| 0.578493392                                 | 0.014163617                                        | 5.756451492                           | 0.010925651                                             |
| 0.639024974                                 | 0.006497722                                        | 6.30861438                            | 0.004339682                                             |

| log.sigma.2.5.mm.3D_ngtdm_Coarseness | log.sigma.2.5.mm.3D_ngtdm_Complexity | log.sigma.2.5.mm.3D_ngtdm_Strength | log.sigma.2.5.mm.3D_ngtdm_Busyness | log.sigma.2.5.mm.3D_ngtdm_Contrast |
|--------------------------------------|--------------------------------------|------------------------------------|------------------------------------|------------------------------------|
| 0.003756165                          | 0.728157079                          | 1.84023402                         | 0.25906693                         | 6.82E-05                           |
| 0.008720073                          | 0.377827392                          | 1.989169247                        | 0.276572578                        | 6.03E-05                           |
| 0.005840116                          | 0.244406613                          | 1.163105996                        | 0.528468988                        | 4.80E-05                           |
| 0.008756533                          | 0.915315888                          | 2.961604315                        | 0.16584296                         | 0.000123684                        |
| 0.003346063                          | 0.309405749                          | 1.101595724                        | 0.454069014                        | 3.46E-05                           |
| 0.012507179                          | 1.293401558                          | 4.30690478                         | 0.139076967                        | 0.000165594                        |
| 0.001505809                          | 0.186296132                          | 0.827985069                        | 0.681916351                        | 8.62E-06                           |
| 0.00173052                           | 0.204358785                          | 0.99774053                         | 0.552957132                        | 8.99E-06                           |
| 0.001820168                          | 0.276337231                          | 0.990986129                        | 0.502630362                        | 1.35E-05                           |
| 0.007867638                          | 0.612272981                          | 2.47394224                         | 0.21005383                         | 8.30E-05                           |
| 0.005259006                          | 0.258917783                          | 0.965905114                        | 0.533465442                        | 5.18E-05                           |
| 0.003424682                          | 0.413743417                          | 1.508771881                        | 0.325228169                        | 3.75E-05                           |
| 0.004564706                          | 0.242780888                          | 1.728348623                        | 0.32689653                         | 2.35E-05                           |
| 0.005091085                          | 0.870036126                          | 3.624551205                        | 0.140027476                        | 4.08E-05                           |
| 0.003825431                          | 0.702748667                          | 1.969928504                        | 0.264946268                        | 4.62E-05                           |
| 0.001967566                          | 0.200520931                          | 0.848595857                        | 0.636943106                        | 1.37E-05                           |
| 0.007214034                          | 0.521079191                          | 1.664585661                        | 0.2852551                          | 8.22E-05                           |
| 0.006756395                          | 0.286498017                          | 1.567722646                        | 0.372684235                        | 4.99E-05                           |
| 0.006085036                          | 0.304871446                          | 1.434949489                        | 0.411765483                        | 3.69E-05                           |
| 0.001704563                          | 0.198559117                          | 0.852696735                        | 0.648998589                        | 1.14E-05                           |
| 0.003069655                          | 0.125277642                          | 0.88763871                         | 0.610412823                        | 1.27E-05                           |
| 0.007279586                          | 0.319957601                          | 1.290555342                        | 0.408203367                        | 7.22E-05                           |
| 0.007941901                          | 0.590335116                          | 2.382688757                        | 0.215402321                        | 6.34E-05                           |
| 0.003166676                          | 0.207578383                          | 0.820378758                        | 0.662418149                        | 2.45E-05                           |
| 0.006535009                          | 0.797871101                          | 3.502264504                        | 0.150788454                        | 4.73E-05                           |
| 0.003715078                          | 0.619578244                          | 2.159766731                        | 0.254546959                        | 3.35E-05                           |
| 0.002776882                          | 0.430318976                          | 1.460063008                        | 0.352741791                        | 2.34E-05                           |
| 0.003054418                          | 0.325924157                          | 1.35481888                         | 0.361503661                        | 2.10E-05                           |
| 0.016427348                          | 0.589024015                          | 2.213083133                        | 0.244480884                        | 0.000228653                        |
| 0.003890581                          | 0.243100573                          | 1.276090674                        | 0.400413325                        | 2.24E-05                           |
| 0.001771114                          | 0.228827763                          | 1.01758521                         | 0.494355223                        | 1.03E-05                           |
| 0.004208155                          | 0.278437758                          | 1.29180923                         | 0.349645421                        | 2.82E-05                           |
| 0.002795092                          | 0.355587508                          | 1.216315932                        | 0.412722266                        | 2.74E-05                           |
| 0.003616277                          | 0.456716257                          | 1.749792848                        | 0.289715568                        | 3.32E-05                           |
| 0.001942529                          | 0.240087181                          | 0.893112285                        | 0.645046649                        | 1.51E-05                           |
| 0.002974228                          | 0.201324008                          | 0.995414298                        | 0.530929703                        | 1.91E-05                           |
| 0.002352912                          | 0.346875081                          | 1.873146158                        | 0.284858358                        | 9.60E-06                           |
| 0.001863916                          | 0.199327409                          | 1.117616836                        | 0.48770764                         | 9.47E-06                           |
| 0.005534414                          | 0.29342363                           | 1.173772566                        | 0.41902328                         | 4.54E-05                           |
| 0.001254514                          | 0.114811097                          | 0.401725614                        | 1.421696722                        | 1.20E-05                           |
| 0.003343124                          | 0.261465606                          | 1.144568074                        | 0.441287923                        | 2.56E-05                           |
| 0.002137412                          | 0.351359131                          | 0.90702275                         | 0.747968124                        | 2.91E-05                           |
| 0.002328129                          | 0.236972433                          | 0.829961138                        | 0.603193906                        | 2.27E-05                           |
| 0.003085336                          | 0.536475194                          | 1.627893109                        | 0.277534801                        | 3.15E-05                           |
| 0.006474764                          | 0.502279555                          | 2.110331822                        | 0.261306767                        | 5.60E-05                           |
| 0.002995202                          | 0.41565072                           | 1.413714425                        | 0.363474384                        | 2.40E-05                           |
| 0.001904562                          | 0.236210893                          | 1.013144924                        | 0.542332934                        | 1.12E-05                           |
| 0.008686925                          | 0.297307491                          | 1.579559903                        | 0.359658633                        | 6.85E-05                           |
| 0.009170574                          | 0.750694399                          | 2.258908137                        | 0.22569074                         | 0.000143764                        |
| 0.006703576                          | 0.35314798                           | 1.90204789                         | 0.347547851                        | 4.19E-05                           |
| 0.003367525                          | 0.460247701                          | 1.727655163                        | 0.295791136                        | 3.05E-05                           |
| 0.002289509                          | 0.400520369                          | 1.007565749                        | 0.58881545                         | 2.99E-05                           |
| 0.001708654                          | 0.147544839                          | 0.485896359                        | 1.185509816                        | 1.68E-05                           |
| 0.007362547                          | 0.437954161                          | 1.507439551                        | 0.369373976                        | 8.19E-05                           |
| 0.006272892                          | 0.473138741                          | 1.621097135                        | 0.300867035                        | 7.06E-05                           |
| 0.004390441                          | 0.417110514                          | 2.086448868                        | 0.235032569                        | 2.72E-05                           |
| 0.002105621                          | 0.220769472                          | 0.736924401                        | 0.675688991                        | 2.23E-05                           |
| 0.002578588                          | 0.268312726                          | 1.272655259                        | 0.390904709                        | 1.58E-05                           |
| 0.004920006                          | 0.46236133                           | 1.590521038                        | 0.305783507                        | 4.51E-05                           |
| 0.000969397                          | 0.128309965                          | 0.455155745                        | 1.049121649                        | 7.57E-06                           |
| 0.004661367                          | 0.406859859                          | 1.931461119                        | 0.299905662                        | 3.26E-05                           |
| 0.002949717                          | 0.334522651                          | 1.247679584                        | 0.404430694                        | 2.36E-05                           |
| 0.001439141                          | 0.182322026                          | 0.661347121                        | 0.785522805                        | 1.15E-05                           |
| 0.001166334                          | 0.132890018                          | 0.624747205                        | 0.801553034                        | 7.04E-06                           |
| 0.010538219                          | 0.418729709                          | 1.698163099                        | 0.357361868                        | 9.84E-05                           |
| 0.002379391                          | 0.243363284                          | 1.303578486                        | 0.383161226                        | 1.14E-05                           |
| 0.005938961                          | 0.46392871                           | 2.58889117                         | 0.203852064                        | 3.36E-05                           |
| 0.001386499                          | 0.204966054                          | 0.834638833                        | 0.655745059                        | 8.37E-06                           |
| 0.001484652                          | 0.202295958                          | 0.880154801                        | 0.64372167                         | 8.71E-06                           |
| 0.002909398                          | 0.168024117                          | 0.992141029                        | 0.536595502                        | 1.37E-05                           |
| 0.006397896                          | 0.503777007                          | 1.906187908                        | 0.26227301                         | 5.83E-05                           |
| 0.002082067                          | 0.210777338                          | 1.064786008                        | 0.522269474                        | 1.24E-05                           |
| 0.00383281                           | 0.504468226                          | 2.188523547                        | 0.22423155                         | 2.61E-05                           |
| 0.003571702                          | 0.482558969                          | 1.196240181                        | 0.403165048                        | 6.44E-05                           |
| 0.00256499                           | 0.338664127                          | 0.889405391                        | 0.68881067                         | 3.48E-05                           |
| 0.005648338                          | 0.56927999                           | 2.534103314                        | 0.210889214                        | 4.71E-05                           |
| 0.003607013                          | 0.17959637                           | 0.981901592                        | 0.52653975                         | 1.88E-05                           |
| 0.008726192                          | 0.495192955                          | 2.535490792                        | 0.229863051                        | 6.32E-05                           |
| 0.004665459                          | 0.326185964                          | 1.350037453                        | 0.381740945                        | 3.54E-05                           |
| 0.003571915                          | 0.666895123                          | 2.019901811                        | 0.241615567                        | 3.97E-05                           |
| 0.004018089                          | 0.762475554                          | 2.012885801                        | 0.240171807                        | 6.98E-05                           |
| 0.004594299                          | 0.540267526                          | 1.645513891                        | 0.34148467                         | 4.68E-05                           |
| 0.002808581                          | 0.287257799                          | 1.259530619                        | 0.398475346                        | 1.60E-05                           |
| 0.002854308                          | 0.112112284                          | 0.567120501                        | 0.883647239                        | 1.99E-05                           |
| 0.003297858                          | 0.438873913                          | 1.279816115                        | 0.408376179                        | 3.82E-05                           |
| 0.005661796                          | 0.137801166                          | 1.25975119                         | 0.403043242                        | 2.34E-05                           |
| 0.003577976                          | 0.441253724                          | 1.381569329                        | 0.342743242                        | 4.25E-05                           |
| 0.003160247                          | 0.243153942                          | 1.027219868                        | 0.489985068                        | 2.72E-05                           |
| 0.005534925                          | 0.42818134                           | 2.045019536                        | 0.264965367                        | 3.84E-05                           |
| 0.004325346                          | 0.322465978                          | 1.921454762                        | 0.264987376                        | 2.56E-05                           |
| 0.006082064                          | 0.170841778                          | 1.124441391                        | 0.526209484                        | 4.81E-05                           |
| 0.003361225                          | 0.326387017                          | 0.976071109                        | 0.544549481                        | 4.47E-05                           |
| 0.001624121                          | 0.221338111                          | 0.777217259                        | 0.666787162                        | 1.37E-05                           |
| 0.002568619                          | 0.200434805                          | 0.853507487                        | 0.595176994                        | 2.19E-05                           |
| 0.001822343                          | 0.191852883                          | 0.609757357                        | 0.784465206                        | 1.88E-05                           |
| 0.002596009                          | 0.375259036                          | 1.624426975                        | 0.313006807                        | 1.86E-05                           |
| 0.00297916                           | 0.235256002                          | 0.939702384                        | 0.59215585                         | 2.53E-05                           |
| 0.007626989                          | 0.565557125                          | 2.516271874                        | 0.171480547                        | 8.01E-05                           |
| 0.009419694                          | 0.337570501                          | 1.743855914                        | 0.275218862                        | 7.60E-05                           |
| 0.001452363                          | 0.111197964                          | 0.554997299                        | 1.023962321                        | 8.01E-06                           |

| log.sigma.2.0.mm.3D_gldm_GrayLevelVariance | log.sigma.2.0.mm.3D_gldm_HighGrayLevelEmphasis | log.sigma.2.0.mm.3D_gldm_GrayLevelNonUniformityNormalized | log.sigma.2.0.mm.3D_gldm_DependenceEntropy |
|--------------------------------------------|------------------------------------------------|-----------------------------------------------------------|--------------------------------------------|
| 34.58713393                                | 731.3779453                                    | 0.06263186                                                | 6.545563979                                |
| 11.80591267                                | 304.0513369                                    | 0.12292602                                                | 6.038398862                                |
| 12.87385792                                | 238.8135593                                    | 0.104757186                                               | 6.394084731                                |
| 24.58302472                                | 470.3244626                                    | 0.074791861                                               | 6.481231872                                |
| 18.0958556                                 | 399.1532939                                    | 0.087806808                                               | 6.413427445                                |
| 25.68056933                                | 474.8636364                                    | 0.073494031                                               | 6.262795237                                |
| 16.09148382                                | 496.7336755                                    | 0.087558039                                               | 6.587120708                                |
| 16.40991606                                | 461.2333594                                    | 0.102265383                                               | 6.477923871                                |
| 19.48341319                                | 506.3622965                                    | 0.07586215                                                | 6.606706587                                |
| 18.82392724                                | 394.2145522                                    | 0.081861564                                               | 6.283717495                                |
| 12.17613928                                | 258.9244032                                    | 0.09213461                                                | 6.196816342                                |
| 23.08599263                                | 572.0885033                                    | 0.078357433                                               | 6.478797298                                |
| 12.40303596                                | 427.2790573                                    | 0.155191986                                               | 6.237776077                                |
| 25.31908704                                | 798.042516                                     | 0.078954536                                               | 6.571855496                                |
| 26.69023051                                | 507.1925403                                    | 0.075808078                                               | 6.471651329                                |
| 16.25660074                                | 526.5457038                                    | 0.100092452                                               | 6.561822198                                |
| 18.1976332                                 | 329.2738693                                    | 0.07144741                                                | 6.256192249                                |
| 11.22947413                                | 328.6934307                                    | 0.130636346                                               | 6.153246084                                |
| 9.863537836                                | 319.7103236                                    | 0.104058395                                               | 6.192258083                                |
| 20.25288017                                | 509.2335064                                    | 0.080957799                                               | 6.522638778                                |
| 9.986110127                                | 323.536045                                     | 0.127991938                                               | 6.410426329                                |
| 12.02316187                                | 300.9286376                                    | 0.093067501                                               | 6.055986669                                |
| 15.46776962                                | 532.9414063                                    | 0.092908859                                               | 6.289041928                                |
| 14.17224994                                | 338.0090669                                    | 0.085682104                                               | 6.459528654                                |
| 19.30151697                                | 615.3440691                                    | 0.094524072                                               | 6.343129666                                |
| 27.9030737                                 | 455.6192486                                    | 0.062919613                                               | 6.634204015                                |
| 24.50230471                                | 467.9610269                                    | 0.070228732                                               | 6.657127882                                |
| 17.08538608                                | 483.4076756                                    | 0.091320554                                               | 6.356417349                                |
| 12.75726319                                | 267.6845638                                    | 0.085576726                                               | 5.842879485                                |
| 12.05163981                                | 447.6699124                                    | 0.110127815                                               | 6.187254941                                |
| 17.43339904                                | 594.8062211                                    | 0.0979601                                                 | 6.544575108                                |
| 13.94290781                                | 374.6491058                                    | 0.113346903                                               | 6.316555112                                |
| 24.10875044                                | 444.5809848                                    | 0.070332628                                               | 6.801382814                                |
| 22.09674405                                | 542.1502128                                    | 0.081757175                                               | 6.661327222                                |
| 21.23410763                                | 488.5163488                                    | 0.072551293                                               | 6.603143053                                |
| 14.28703733                                | 410.9329777                                    | 0.106213353                                               | 6.435390617                                |
| 17.88724889                                | 814.9744692                                    | 0.110675906                                               | 6.499990779                                |
| 17.38170908                                | 718.3024608                                    | 0.118287744                                               | 6.777307476                                |
| 11.49325732                                | 424.3097561                                    | 0.099132791                                               | 5.999583132                                |
| 19.03665549                                | 324.0554333                                    | 0.067513873                                               | 6.608625687                                |
| 15.16065498                                | 307.5917502                                    | 0.1024406                                                 | 6.414752539                                |
| 26.62848291                                | 328.8955262                                    | 0.055272181                                               | 6.5252015                                  |
| 19.21576774                                | 463.1524774                                    | 0.077674403                                               | 6.52142213                                 |
| 24.71684778                                | 579.3685691                                    | 0.07615364                                                | 6.413216941                                |
| 18.44074699                                | 490.2276995                                    | 0.086694047                                               | 6.333185257                                |
| 18.8071883                                 | 352.504918                                     | 0.078433316                                               | 6.516913442                                |
| 18.38180086                                | 459.0872424                                    | 0.084901175                                               | 6.521151267                                |
| 10.76904096                                | 299.3008037                                    | 0.116678376                                               | 6.041216869                                |
| 23.70039809                                | 352.3278496                                    | 0.073425748                                               | 6.235546823                                |
| 14.21746219                                | 318.1420118                                    | 0.101734008                                               | 6.259839588                                |
| 24.18288208                                | 629.2203192                                    | 0.071774872                                               | 6.481041499                                |
| 25.80906032                                | 461.7775141                                    | 0.061316175                                               | 6.452270089                                |
| 16.51697286                                | 367.4148936                                    | 0.08132146                                                | 6.33591386                                 |
| 14.4448637                                 | 285.7690217                                    | 0.088781243                                               | 6.314213359                                |
| 16.59227825                                | 469.2578947                                    | 0.080633162                                               | 6.299551604                                |
| 15.29848284                                | 366.3707692                                    | 0.092978304                                               | 6.262054369                                |
| 20.40725729                                | 465.9772559                                    | 0.071430828                                               | 6.521312735                                |
| 16.84298503                                | 509.8935801                                    | 0.095269149                                               | 6.446679026                                |
| 18.49787327                                | 478.7669903                                    | 0.086147375                                               | 6.315025106                                |
| 21.40758424                                | 473.7047869                                    | 0.071073909                                               | 6.78471566                                 |
| 16.66647471                                | 372.6489241                                    | 0.108833137                                               | 6.482255025                                |
| 19.22398813                                | 751.6865169                                    | 0.085520627                                               | 6.400748701                                |
| 19.61677553                                | 563.4353083                                    | 0.080759696                                               | 6.544306238                                |
| 18.65528899                                | 529.6536797                                    | 0.082706046                                               | 6.539102851                                |
| 10.98077872                                | 156.9316456                                    | 0.097638199                                               | 6.068172438                                |
| 16.1893806                                 | 476.4707405                                    | 0.103072307                                               | 6.466449959                                |
| 13.38158133                                | 498.833589                                     | 0.117200732                                               | 6.18896483                                 |
| 19.42198275                                | 567.0344                                       | 0.08470697                                                | 6.602983478                                |
| 19.64216239                                | 544.7147004                                    | 0.077305279                                               | 6.481529351                                |
| 10.35058471                                | 438.7177364                                    | 0.118093152                                               | 6.268207854                                |
| 15.39193588                                | 356.830639                                     | 0.088380296                                               | 6.386477441                                |
| 17.24323839                                | 705.9081585                                    | 0.098358409                                               | 6.472869157                                |
| 20.18947981                                | 416.8266784                                    | 0.083363545                                               | 6.626291653                                |
| 29.54723823                                | 475.1328021                                    | 0.061537922                                               | 6.580484042                                |
| 23.81985566                                | 327.3650591                                    | 0.060624425                                               | 6.566259179                                |
| 16.39073518                                | 395.5081967                                    | 0.096341737                                               | 6.192679572                                |
| 11.7545875                                 | 337.2287145                                    | 0.103716615                                               | 6.252596788                                |
| 14.59305007                                | 365.1189979                                    | 0.106973034                                               | 6.165769661                                |
| 13.46159873                                | 483.7949619                                    | 0.096072583                                               | 6.186907282                                |
| 27.10717482                                | 560.4031637                                    | 0.062770601                                               | 6.587466314                                |
| 33.60380484                                | 734.5087984                                    | 0.063704068                                               | 6.526809258                                |
| 22.41411617                                | 383.3507504                                    | 0.08109162                                                | 6.590227069                                |
| 16.52975208                                | 490.5408382                                    | 0.094364864                                               | 6.585002309                                |
| 10.31807639                                | 253.5785877                                    | 0.09668656                                                | 6.342878656                                |
| 22.87784584                                | 407.3690037                                    | 0.070808666                                               | 6.570022061                                |
| 6.263869479                                | 307.4177546                                    | 0.164294869                                               | 6.218386291                                |
| 23.87617825                                | 383.9844864                                    | 0.072644278                                               | 6.731694011                                |
| 17.44744089                                | 440.4832239                                    | 0.086176296                                               | 6.550932977                                |
| 15.28867641                                | 457.9829235                                    | 0.096473842                                               | 6.338065834                                |
| 14.41114074                                | 532.0241975                                    | 0.107603841                                               | 6.394800384                                |
| 8.555889853                                | 363.3466258                                    | 0.156402904                                               | 6.058639958                                |
| 20.70897689                                | 402.6964736                                    | 0.065851781                                               | 6.391121374                                |
| 21.37474324                                | 396.902759                                     | 0.074806701                                               | 6.526056008                                |
| 16.25882195                                | 341.6457576                                    | 0.090509826                                               | 6.504887368                                |
| 19.16044427                                | 431.5434283                                    | 0.071964251                                               | 6.487112558                                |
| 23.87999924                                | 691.7746932                                    | 0.090792005                                               | 6.659976982                                |
| 15.9353968                                 | 284.4554491                                    | 0.083535243                                               | 6.445603893                                |
| 19.35702407                                | 683.686724                                     | 0.098425574                                               | 6.272117949                                |
| 10.11046127                                | 237.6354916                                    | 0.113905998                                               | 6.135641551                                |
| 12.37425071                                | 412.5197437                                    | 0.122815701                                               | 6.392598052                                |

| log.sigma.2.0.mm.3D_gldm_DependenceNonUniformity | log.sigma.2.0.mm.3D_gldm_GrayLevelNonUniformity | log.sigma.2.0.mm.3D_gldm_SmallDependenceEmphasis |
|--------------------------------------------------|-------------------------------------------------|--------------------------------------------------|
| 463.6182846                                      | 132.9048068                                     | 0.402830161                                      |
| 122.4331551                                      | 114.9358289                                     | 0.252565153                                      |
| 203.166884                                       | 160.6975228                                     | 0.253928418                                      |
| 160.6601842                                      | 73.0716479                                      | 0.317693531                                      |
| 398.2060811                                      | 207.9265203                                     | 0.324591741                                      |
| 138.2060606                                      | 48.5060606                                      | 0.392548545                                      |
| 895.4855778                                      | 494.7904796                                     | 0.307979635                                      |
| 697.0191856                                      | 522.371574                                      | 0.28048998                                       |
| 799.5961285                                      | 344.8693357                                     | 0.336689478                                      |
| 195.738806                                       | 87.75559701                                     | 0.34611395                                       |
| 259.6246684                                      | 138.938992                                      | 0.311523245                                      |
| 411.2264642                                      | 180.6138829                                     | 0.343122007                                      |
| 186.0433851                                      | 289.7434387                                     | 0.205316562                                      |
| 287.6534653                                      | 135.5649388                                     | 0.310923669                                      |
| 364.1774194                                      | 150.4032258                                     | 0.350970014                                      |
| 603.5772395                                      | 438.0045704                                     | 0.2770883                                        |
| 257.2512563                                      | 85.30820771                                     | 0.371561584                                      |
| 145.9748581                                      | 161.0746148                                     | 0.221232469                                      |
| 197.3297381                                      | 135.0677966                                     | 0.271717599                                      |
| 917.3027505                                      | 420.8995961                                     | 0.330637945                                      |
| 334.9332011                                      | 387.047619                                      | 0.215592441                                      |
| 198.3901761                                      | 100.4198332                                     | 0.323398776                                      |
| 160.9160156                                      | 95.13867188                                     | 0.293190326                                      |
| 432.535323                                       | 226.8005289                                     | 0.317082373                                      |
| 195.153967                                       | 120.3291438                                     | 0.301443301                                      |
| 480.6479527                                      | 149.056564                                      | 0.373205366                                      |
| 585.4918033                                      | 227.0494896                                     | 0.347458047                                      |
| 452.9319334                                      | 252.2273715                                     | 0.31539519                                       |
| 97.17897092                                      | 38.25279642                                     | 0.351330516                                      |
| 308.7088608                                      | 226.2025316                                     | 0.269841959                                      |
| 664.1214796                                      | 466.0941572                                     | 0.295527181                                      |
| 272.3765104                                      | 234.5147414                                     | 0.2603889                                        |
| 546.5961598                                      | 227.104057                                      | 0.318076587                                      |
| 354.9582979                                      | 192.1293617                                     | 0.312421817                                      |
| 797.5690282                                      | 319.5158946                                     | 0.345416266                                      |
| 394.6512171                                      | 318.5338446                                     | 0.260989571                                      |
| 480.7592045                                      | 411.825047                                      | 0.26632393                                       |
| 536.5636505                                      | 610.4830459                                     | 0.237628708                                      |
| 214.4195122                                      | 121.9333333                                     | 0.293425796                                      |
| 1416.444292                                      | 490.8258597                                     | 0.336109706                                      |
| 365.5304549                                      | 265.7309175                                     | 0.264227544                                      |
| 950.8924231                                      | 213.7375226                                     | 0.426731562                                      |
| 658.3566931                                      | 283.7445935                                     | 0.326967334                                      |
| 481.1913183                                      | 189.4702572                                     | 0.352529446                                      |
| 208.1909233                                      | 110.7949922                                     | 0.306601184                                      |
| 479.5632058                                      | 215.2994536                                     | 0.341039623                                      |
| 741.2889084                                      | 387.3191583                                     | 0.308068356                                      |
| 130.5729047                                      | 101.6268657                                     | 0.261766006                                      |
| 181.7990599                                      | 62.4853114                                      | 0.397759032                                      |
| 190.9497041                                      | 137.5443787                                     | 0.267769514                                      |
| 502.6800311                                      | 184.3896458                                     | 0.354823777                                      |
| 812.7063186                                      | 206.6968259                                     | 0.418224743                                      |
| 841.2371454                                      | 366.9224291                                     | 0.346338353                                      |
| 181.2264493                                      | 98.01449275                                     | 0.297777878                                      |
| 235.3353383                                      | 107.2421053                                     | 0.32369347                                       |
| 326.7179487                                      | 181.3076923                                     | 0.286879191                                      |
| 788.1851669                                      | 288.9377009                                     | 0.351659889                                      |
| 519.086177                                       | 329.4407172                                     | 0.286745049                                      |
| 295.9332524                                      | 141.9708738                                     | 0.335798645                                      |
| 1583.058933                                      | 648.8337167                                     | 0.330429212                                      |
| 223.4337486                                      | 192.1993205                                     | 0.288563646                                      |
| 457.7325843                                      | 228.3400749                                     | 0.333933232                                      |
| 972.4544826                                      | 467.5178787                                     | 0.332411783                                      |
| 1290.499672                                      | 630.4681884                                     | 0.310635614                                      |
| 132.0177215                                      | 77.13417722                                     | 0.277462149                                      |
| 534.5484205                                      | 398.0652512                                     | 0.281637859                                      |
| 178.0046012                                      | 152.8297546                                     | 0.271424342                                      |
| 1014.84736                                       | 529.41856                                       | 0.307130946                                      |
| 1119.90729                                       | 452.777019                                      | 0.365192181                                      |
| 373.3795721                                      | 342.2339545                                     | 0.239301127                                      |
| 205.4526559                                      | 114.8060046                                     | 0.29790019                                       |
| 597.183683                                       | 421.9575758                                     | 0.269468925                                      |
| 353.2887231                                      | 189.98552                                       | 0.30213846                                       |
| 481.9437804                                      | 139.0141656                                     | 0.378866517                                      |
| 684.1031619                                      | 189.8150751                                     | 0.381048432                                      |
| 226.561848                                       | 129.290611                                      | 0.314619655                                      |
| 364.4966611                                      | 248.5050083                                     | 0.272509916                                      |
| 136.263048                                       | 102.480167                                      | 0.259668382                                      |
| 288.4997071                                      | 163.9958992                                     | 0.303328632                                      |
| 485.5412569                                      | 146.8204361                                     | 0.380240477                                      |
| 434.7958773                                      | 126.7073906                                     | 0.409897266                                      |
| 298.4652585                                      | 145.8838243                                     | 0.334560841                                      |
| 462.7191802                                      | 308.4787397                                     | 0.292466897                                      |
| 477.5733811                                      | 297.1178002                                     | 0.262171722                                      |
| 458.6924969                                      | 172.702337                                      | 0.347600578                                      |
| 143.3733681                                      | 251.6997389                                     | 0.163061742                                      |
| 405.1417191                                      | 173.2566038                                     | 0.337919468                                      |
| 411.3391685                                      | 236.2954048                                     | 0.298040013                                      |
| 231.5737705                                      | 141.2377049                                     | 0.307245752                                      |
| 276.4103704                                      | 217.8977778                                     | 0.25428868                                       |
| 134.4861963                                      | 203.9493865                                     | 0.21527715                                       |
| 542.3845508                                      | 156.8589421                                     | 0.386720056                                      |
| 977.5000965                                      | 387.7231333                                     | 0.341582511                                      |
| 502.4393939                                      | 298.6824242                                     | 0.291941321                                      |
| 867.7674632                                      | 313.1884191                                     | 0.361314635                                      |
| 492.3436587                                      | 310.6902396                                     | 0.299623328                                      |
| 492.6308129                                      | 235.3187788                                     | 0.309712319                                      |
| 164.8032474                                      | 103.0515759                                     | 0.313657211                                      |
| 120.6235012                                      | 94.99760192                                     | 0.244799954                                      |
| 688.7440249                                      | 709.1378594                                     | 0.248913797                                      |

| log.sigma.2.0.mm.3D_gldm_DependenceNonUniformityNormalized | log.sigma.2.0.mm.3D_gldm_DependenceVariance | log.sigma.2.0.mm.3D_gldm_LargeDependenceEmphasis |
|------------------------------------------------------------|---------------------------------------------|--------------------------------------------------|
| 0.218481755                                                | 2.966174567                                 | 9.905749293                                      |
| 0.130944551                                                | 6.547417427                                 | 22.26631016                                      |
| 0.132442558                                                | 8.33001297                                  | 24.82398957                                      |
| 0.164442358                                                | 4.524549804                                 | 15.24564995                                      |
| 0.168161352                                                | 5.320147005                                 | 16.14780405                                      |
| 0.209403122                                                | 2.872277319                                 | 10.0969697                                       |
| 0.158464976                                                | 7.202016446                                 | 19.6841267                                       |
| 0.136456379                                                | 7.186869032                                 | 22.05794832                                      |
| 0.175890041                                                | 4.608402469                                 | 14.45358557                                      |
| 0.18259217                                                 | 3.679100997                                 | 12.69029851                                      |
| 0.172164899                                                | 3.707909716                                 | 13.63793103                                      |
| 0.178406275                                                | 3.675630361                                 | 12.91670282                                      |
| 0.099648305                                                | 12.45777578                                 | 38.16979111                                      |
| 0.167532595                                                | 4.339019616                                 | 14.82877111                                      |
| 0.183557167                                                | 3.634786965                                 | 12.53225806                                      |
| 0.137928985                                                | 7.316818679                                 | 22.16819013                                      |
| 0.215453313                                                | 2.411342026                                 | 9.380234506                                      |
| 0.11838999                                                 | 7.619831493                                 | 26.46796431                                      |
| 0.152025992                                                | 4.434851769                                 | 16.63636364                                      |
| 0.176438306                                                | 4.306545775                                 | 14.06751298                                      |
| 0.110758334                                                | 10.97990678                                 | 32.90608466                                      |
| 0.183864853                                                | 3.074945823                                 | 12.00834106                                      |
| 0.157144547                                                | 4.259765625                                 | 15.65039063                                      |
| 0.163405864                                                | 4.645136899                                 | 15.48507745                                      |
| 0.153302409                                                | 5.309835245                                 | 17.38177533                                      |
| 0.202890651                                                | 2.913068959                                 | 10.48079358                                      |
| 0.181098609                                                | 4.154618763                                 | 13.45777915                                      |
| 0.163986942                                                | 4.405019817                                 | 15.08906589                                      |
| 0.21740262                                                 | 2.073219925                                 | 9.053691275                                      |
| 0.150296427                                                | 4.79720952                                  | 17.35929893                                      |
| 0.139579966                                                | 7.838200161                                 | 22.54392602                                      |
| 0.131646453                                                | 6.10865825                                  | 21.40889319                                      |
| 0.169277225                                                | 4.852837512                                 | 15.41684732                                      |
| 0.151046084                                                | 6.674878407                                 | 19.53702128                                      |
| 0.181101051                                                | 4.223691657                                 | 13.55086285                                      |
| 0.13159427                                                 | 7.576777899                                 | 23.50483494                                      |
| 0.129201614                                                | 7.1418886                                   | 23.11824778                                      |
| 0.103965055                                                | 17.70754366                                 | 44.43770587                                      |
| 0.174324807                                                | 2.886334854                                 | 12.62276423                                      |
| 0.194834153                                                | 3.023809176                                 | 11.29160935                                      |
| 0.140913822                                                | 6.154497449                                 | 20.30531997                                      |
| 0.245899256                                                | 1.740314647                                 | 7.254978019                                      |
| 0.180223568                                                | 4.093904496                                 | 13.59676978                                      |
| 0.193404871                                                | 3.335288484                                 | 11.64951768                                      |
| 0.162903696                                                | 4.417353014                                 | 15.26917058                                      |
| 0.174704264                                                | 4.587873298                                 | 14.48342441                                      |
| 0.162492089                                                | 4.768905052                                 | 15.81192459                                      |
| 0.149911486                                                | 4.765054881                                 | 17.5717566                                       |
| 0.213629918                                                | 2.468996867                                 | 9.317273796                                      |
| 0.141234988                                                | 5.970781835                                 | 20.02218935                                      |
| 0.19567148                                                 | 3.113942762                                 | 11.20397042                                      |
| 0.241087606                                                | 1.978354825                                 | 7.767724711                                      |
| 0.186444403                                                | 3.087676165                                 | 11.6179078                                       |
| 0.164154392                                                | 4.429111531                                 | 15.34782609                                      |
| 0.176943863                                                | 3.655539601                                 | 13.13082707                                      |
| 0.167547666                                                | 3.895700197                                 | 14.53333333                                      |
| 0.194854182                                                | 3.519548222                                 | 11.8815822                                       |
| 0.150111676                                                | 5.175792397                                 | 17.61885483                                      |
| 0.179571148                                                | 3.536842245                                 | 12.70509709                                      |
| 0.173409895                                                | 6.10412344                                  | 16.92288312                                      |
| 0.126519676                                                | 8.775938868                                 | 25.96602492                                      |
| 0.171435425                                                | 5.088627979                                 | 15.51161049                                      |
| 0.167983155                                                | 5.396242199                                 | 16.20124374                                      |
| 0.169290263                                                | 4.14701406                                  | 14.44536272                                      |
| 0.16711104                                                 | 3.541137638                                 | 14.42278481                                      |
| 0.138412331                                                | 6.94523516                                  | 21.46090109                                      |
| 0.136506596                                                | 6.553850352                                 | 21.25613497                                      |
| 0.162375578                                                | 5.10584064                                  | 16.29888                                         |
| 0.191208347                                                | 3.571753157                                 | 11.97353594                                      |
| 0.128840432                                                | 6.3212277                                   | 22.47619048                                      |
| 0.158162168                                                | 5.351529364                                 | 17.16628176                                      |
| 0.139203656                                                | 6.078065214                                 | 20.26759907                                      |
| 0.155019185                                                | 6.097220535                                 | 18.41026766                                      |
| 0.21334386                                                 | 3.116267996                                 | 10.43426295                                      |
| 0.218493504                                                | 2.61904604                                  | 9.533375918                                      |
| 0.16882403                                                 | 4.401740401                                 | 14.81222057                                      |
| 0.152127154                                                | 4.788830717                                 | 17.17946578                                      |
| 0.142237002                                                | 5.11249951                                  | 18.75156576                                      |
| 0.169009787                                                | 3.66124257                                  | 13.84358524                                      |
| 0.207584975                                                | 2.786697158                                 | 10.09448482                                      |
| 0.21860024                                                 | 3.079342619                                 | 10.04374057                                      |
| 0.165906203                                                | 6.22522487                                  | 17.483602                                        |
| 0.141547623                                                | 9.280454778                                 | 24.27623126                                      |
| 0.155409496                                                | 4.375381182                                 | 16.5196876                                       |
| 0.188065804                                                | 3.63402755                                  | 12.37515375                                      |
| 0.093585749                                                | 12.30850984                                 | 41.66057441                                      |
| 0.169870742                                                | 5.921948587                                 | 16.81886792                                      |
| 0.150014285                                                | 6.01470866                                  | 18.71553611                                      |
| 0.158178805                                                | 5.318192168                                 | 16.99180328                                      |
| 0.136498948                                                | 6.955711385                                 | 22.10222222                                      |
| 0.103133586                                                | 11.31274229                                 | 35.28067485                                      |
| 0.227701323                                                | 2.272953251                                 | 8.711167086                                      |
| 0.188597356                                                | 3.261571124                                 | 11.83156473                                      |
| 0.152254362                                                | 5.524726905                                 | 17.91939394                                      |
| 0.199395097                                                | 2.954417298                                 | 10.77435662                                      |
| 0.143875996                                                | 8.010937582                                 | 22.27469316                                      |
| 0.174877818                                                | 4.009141214                                 | 13.95278665                                      |
| 0.157405203                                                | 4.706049668                                 | 16.09264565                                      |
| 0.144632495                                                | 5.574360655                                 | 19.55155875                                      |
| 0.11928369                                                 | 9.403584071                                 | 28.30966401                                      |



| log.sigma.2.0.mm.3D_gldm_LargeDependenceLowGrayLevelEmphasis | log.sigma.2.0.mm.3D_gldm_SmallDependenceHighGrayLevelEmphasis | log.sigma.2.0.mm.3D_gldm_LargeDependenceHighGrayLevelEmphasis |
|--------------------------------------------------------------|---------------------------------------------------------------|---------------------------------------------------------------|
| 0.015481962                                                  | 274.9057772                                                   | 7454.374175                                                   |
| 0.081815976                                                  | 74.7009215                                                    | 6528                                                          |
| 0.129307525                                                  | 64.48477098                                                   | 5230.113429                                                   |
| 0.034820235                                                  | 127.8642345                                                   | 7723.073695                                                   |
| 0.046014932                                                  | 118.1714735                                                   | 6631.228463                                                   |
| 0.025878156                                                  | 184.1426712                                                   | 4619.806061                                                   |
| 0.043755351                                                  | 152.0808907                                                   | 9278.903911                                                   |
| 0.052440255                                                  | 125.170046                                                    | 9758.216915                                                   |
| 0.032202844                                                  | 159.63713                                                     | 7357.611307                                                   |
| 0.036235043                                                  | 127.2509576                                                   | 5071.216418                                                   |
| 0.059672321                                                  | 77.45662906                                                   | 3556.282493                                                   |
| 0.027353644                                                  | 186.0869069                                                   | 7361.601735                                                   |
| 0.095263971                                                  | 83.54403792                                                   | 15727.01982                                                   |
| 0.020710763                                                  | 241.2227434                                                   | 11871.33663                                                   |
| 0.030291558                                                  | 167.3200375                                                   | 6460.233871                                                   |
| 0.045324559                                                  | 141.5541732                                                   | 11413.87386                                                   |
| 0.034635624                                                  | 123.1193606                                                   | 3046.526801                                                   |
| 0.088921317                                                  | 68.20896936                                                   | 8389.36983                                                    |
| 0.054039753                                                  | 81.86280315                                                   | 5460.881356                                                   |
| 0.030880054                                                  | 165.1296282                                                   | 7021.072706                                                   |
| 0.110538077                                                  | 69.96037658                                                   | 10112.72652                                                   |
| 0.043320777                                                  | 93.17830341                                                   | 3681.134384                                                   |
| 0.031674312                                                  | 148.8570857                                                   | 8377.273438                                                   |
| 0.052073605                                                  | 106.9132972                                                   | 4994.519078                                                   |
| 0.031688581                                                  | 182.8058                                                      | 10301.36606                                                   |
| 0.029413492                                                  | 170.0781684                                                   | 4582.101309                                                   |
| 0.035977346                                                  | 160.3480377                                                   | 6135.053511                                                   |
| 0.034616111                                                  | 144.0412435                                                   | 7267.01593                                                    |
| 0.041105953                                                  | 91.73754567                                                   | 2362.977629                                                   |
| 0.040734952                                                  | 112.9199339                                                   | 7883.220058                                                   |
| 0.041586652                                                  | 169.4529702                                                   | 12925.67255                                                   |
| 0.059732599                                                  | 89.56864197                                                   | 8199.699855                                                   |
| 0.040586653                                                  | 139.0683883                                                   | 6761.745432                                                   |
| 0.043002355                                                  | 160.4258362                                                   | 10351.2234                                                    |
| 0.031449235                                                  | 164.9169572                                                   | 6403.839691                                                   |
| 0.063670771                                                  | 108.0982822                                                   | 9141.285762                                                   |
| 0.02939541                                                   | 209.2054113                                                   | 18794.53641                                                   |
| 0.066428773                                                  | 173.5673874                                                   | 30274.77756                                                   |
| 0.030721157                                                  | 115.8878453                                                   | 5648.968293                                                   |
| 0.042567889                                                  | 108.2819174                                                   | 3571.500825                                                   |
| 0.074306606                                                  | 76.45927258                                                   | 6300.745952                                                   |
| 0.030111328                                                  | 140.9984465                                                   | 2361.506336                                                   |
| 0.03486068                                                   | 145.628035                                                    | 6219.139338                                                   |
| 0.022763706                                                  | 193.8975149                                                   | 6929.793006                                                   |
| 0.035963678                                                  | 144.0102508                                                   | 7227.607981                                                   |
| 0.048225262                                                  | 119.1300132                                                   | 4897.244444                                                   |
| 0.039037392                                                  | 138.6970353                                                   | 7053.70057                                                    |
| 0.061492861                                                  | 73.12656018                                                   | 5398.092997                                                   |
| 0.033469956                                                  | 133.348239                                                    | 3353.519389                                                   |
| 0.073617549                                                  | 84.99138971                                                   | 5848.968935                                                   |
| 0.020431522                                                  | 216.8558969                                                   | 6939.499805                                                   |
| 0.020915677                                                  | 193.7480479                                                   | 3582.704835                                                   |
| 0.034735887                                                  | 121.4023136                                                   | 4341.345745                                                   |
| 0.064193778                                                  | 86.1825265                                                    | 4162.111413                                                   |
| 0.030815786                                                  | 145.077541                                                    | 6107.224812                                                   |
| 0.045804966                                                  | 97.98475655                                                   | 5376.275385                                                   |
| 0.028966123                                                  | 159.2914112                                                   | 5538.200247                                                   |
| 0.036514959                                                  | 139.5531104                                                   | 9035.806246                                                   |
| 0.028259904                                                  | 150.6410835                                                   | 6266.375                                                      |
| 0.04160938                                                   | 156.045756                                                    | 7597.683974                                                   |
| 0.076535037                                                  | 102.6830341                                                   | 9312.996602                                                   |
| 0.02205926                                                   | 236.3907615                                                   | 11512.42959                                                   |
| 0.031525298                                                  | 178.8488184                                                   | 8823.953878                                                   |
| 0.029558386                                                  | 159.8866751                                                   | 7676.779221                                                   |
| 0.120087231                                                  | 42.63685461                                                   | 2181.063291                                                   |
| 0.048878775                                                  | 130.8042298                                                   | 10008.21699                                                   |
| 0.04498013                                                   | 125.9238527                                                   | 10671.35199                                                   |
| 0.030306688                                                  | 166.7510901                                                   | 9343.44624                                                    |
| 0.023229804                                                  | 186.1418401                                                   | 6769.182858                                                   |
| 0.054461164                                                  | 100.469139                                                    | 9654.518288                                                   |
| 0.052273135                                                  | 97.79593507                                                   | 6207.113934                                                   |
| 0.030791479                                                  | 184.273385                                                    | 13853.38415                                                   |
| 0.054307471                                                  | 121.2736968                                                   | 7422.917069                                                   |
| 0.025584391                                                  | 167.0881857                                                   | 5208.729969                                                   |
| 0.037918973                                                  | 122.6240837                                                   | 3104.07793                                                    |
| 0.042953949                                                  | 116.3331971                                                   | 5983.433681                                                   |
| 0.056127167                                                  | 91.13635913                                                   | 5548.471619                                                   |
| 0.056972476                                                  | 88.92443464                                                   | 6790.438413                                                   |
| 0.029997385                                                  | 138.4557389                                                   | 6848.041008                                                   |
| 0.022415527                                                  | 212.8192446                                                   | 5752.987174                                                   |
| 0.015564406                                                  | 283.7748523                                                   | 7539.24183                                                    |
| 0.052203217                                                  | 118.4243708                                                   | 6803.132852                                                   |
| 0.055781842                                                  | 141.633616                                                    | 11152.3469                                                    |
| 0.070331518                                                  | 64.09380281                                                   | 4308.410999                                                   |
| 0.036076466                                                  | 135.6452254                                                   | 5109.092661                                                   |
| 0.139817034                                                  | 46.14398632                                                   | 12757.82507                                                   |
| 0.050572361                                                  | 125.4369014                                                   | 6581.363941                                                   |
| 0.050896312                                                  | 127.6340105                                                   | 7774.246171                                                   |
| 0.041334376                                                  | 135.4650859                                                   | 7657.696038                                                   |
| 0.043598806                                                  | 126.3764599                                                   | 11776.58519                                                   |
| 0.106194425                                                  | 78.63664857                                                   | 12011.06595                                                   |
| 0.026416175                                                  | 156.7523916                                                   | 3416.096138                                                   |
| 0.034803974                                                  | 128.1837091                                                   | 4780.28497                                                    |
| 0.061071164                                                  | 92.23711302                                                   | 6041.352424                                                   |
| 0.027987255                                                  | 149.8868703                                                   | 4778.497932                                                   |
| 0.035942782                                                  | 199.6616341                                                   | 14839.03653                                                   |
| 0.056428677                                                  | 87.49465571                                                   | 4013.724885                                                   |
| 0.024580947                                                  | 199.5934999                                                   | 11392.04776                                                   |
| 0.084758484                                                  | 51.92246498                                                   | 4922.285372                                                   |
| 0.075529368                                                  | 101.4473141                                                   | 10954.2655                                                    |

| log.sigma.2.0.mm.3D_gldm_SmallDependenceLowGrayLevelEmphasis | log.sigma.2.0.mm.3D_gldm_LowGrayLevelEmphasis | log.sigma.2.0.mm.3D_gldm_DistanceZoneVariabilityNormalized |
|--------------------------------------------------------------|-----------------------------------------------|------------------------------------------------------------|
| 0.00154348                                                   | 0.002509152                                   | 0.993896293                                                |
| 0.002871269                                                  | 0.005872282                                   | 1                                                          |
| 0.00358038                                                   | 0.007679708                                   | 1                                                          |
| 0.002863129                                                  | 0.004553388                                   | 1                                                          |
| 0.002226169                                                  | 0.004743271                                   | 1                                                          |
| 0.002954403                                                  | 0.004439957                                   | 1                                                          |
| 0.001048315                                                  | 0.002616768                                   | 0.993933322                                                |
| 0.001402165                                                  | 0.003133759                                   | 0.99873177                                                 |
| 0.001317109                                                  | 0.003074561                                   | 0.997701152                                                |
| 0.00300603                                                   | 0.00488922                                    | 1                                                          |
| 0.003037693                                                  | 0.006400067                                   | 1                                                          |
| 0.002092903                                                  | 0.003681891                                   | 0.990950413                                                |
| 0.001539434                                                  | 0.00356334                                    | 1                                                          |
| 0.00167296                                                   | 0.002652298                                   | 1                                                          |
| 0.002431183                                                  | 0.004385669                                   | 1                                                          |
| 0.001169423                                                  | 0.002713095                                   | 1                                                          |
| 0.002677027                                                  | 0.00503206                                    | 1                                                          |
| 0.002034005                                                  | 0.004876535                                   | 1                                                          |
| 0.002012711                                                  | 0.004426285                                   | 1                                                          |
| 0.001669765                                                  | 0.003199498                                   | 0.994918732                                                |
| 0.001384549                                                  | 0.004069473                                   | 1                                                          |
| 0.002867851                                                  | 0.005367209                                   | 1                                                          |
| 0.001851604                                                  | 0.003268919                                   | 1                                                          |
| 0.001947875                                                  | 0.004266742                                   | 0.997910138                                                |
| 0.002195317                                                  | 0.00338471                                    | 1                                                          |
| 0.002226943                                                  | 0.003998597                                   | 1                                                          |
| 0.001853453                                                  | 0.003992298                                   | 1                                                          |
| 0.001803384                                                  | 0.003496712                                   | 1                                                          |
| 0.004127277                                                  | 0.006881933                                   | 1                                                          |
| 0.001933861                                                  | 0.003665301                                   | 1                                                          |
| 0.001382177                                                  | 0.00273596                                    | 1                                                          |
| 0.002151383                                                  | 0.004322032                                   | 1                                                          |
| 0.001910631                                                  | 0.003899618                                   | 0.996598649                                                |
| 0.001555322                                                  | 0.003665953                                   | 1                                                          |
| 0.001420601                                                  | 0.002990274                                   | 0.988584851                                                |
| 0.001394737                                                  | 0.003450866                                   | 0.997671714                                                |
| 0.000804177                                                  | 0.001744906                                   | 1                                                          |
| 0.000758301                                                  | 0.001892764                                   | 1                                                          |
| 0.002183858                                                  | 0.003907807                                   | 1                                                          |
| 0.001940425                                                  | 0.004577348                                   | 0.997224155                                                |
| 0.002750028                                                  | 0.005737781                                   | 1                                                          |
| 0.002872311                                                  | 0.005304833                                   | 0.995884791                                                |
| 0.00156633                                                   | 0.003654874                                   | 1                                                          |
| 0.00197969                                                   | 0.003317227                                   | 0.998002                                                   |
| 0.002535003                                                  | 0.004110648                                   | 1                                                          |
| 0.00268841                                                   | 0.004976886                                   | 1                                                          |
| 0.001710966                                                  | 0.003509423                                   | 0.99749844                                                 |
| 0.003163149                                                  | 0.005803109                                   | 1                                                          |
| 0.00474532                                                   | 0.007016489                                   | 1                                                          |
| 0.00254714                                                   | 0.005123676                                   | 0.995049535                                                |
| 0.001583677                                                  | 0.002759558                                   | 0.998076925                                                |
| 0.001953019                                                  | 0.003600734                                   | 0.998790079                                                |
| 0.00194829                                                   | 0.003962741                                   | 1                                                          |
| 0.002910603                                                  | 0.006053122                                   | 1                                                          |
| 0.00176442                                                   | 0.003338652                                   | 1                                                          |
| 0.003193513                                                  | 0.005705715                                   | 1                                                          |
| 0.00158997                                                   | 0.003316326                                   | 0.99400485                                                 |
| 0.001356362                                                  | 0.002873217                                   | 1                                                          |
| 0.001966474                                                  | 0.003482209                                   | 1                                                          |
| 0.001558727                                                  | 0.003334641                                   | 0.996567516                                                |
| 0.002399175                                                  | 0.004510978                                   | 1                                                          |
| 0.001066369                                                  | 0.001996264                                   | 0.998013905                                                |
| 0.001157747                                                  | 0.002448974                                   | 0.991743261                                                |
| 0.0012895                                                    | 0.002776666                                   | 0.988126583                                                |
| 0.00588097                                                   | 0.012646787                                   | 1                                                          |
| 0.001585584                                                  | 0.003257183                                   | 0.988235706                                                |
| 0.001930213                                                  | 0.003542601                                   | 1                                                          |
| 0.001046684                                                  | 0.002402962                                   | 0.990804794                                                |
| 0.001480481                                                  | 0.002761584                                   | 1                                                          |
| 0.001191259                                                  | 0.003068698                                   | 1                                                          |
| 0.002413122                                                  | 0.004703563                                   | 1                                                          |
| 0.000849441                                                  | 0.001936454                                   | 0.993695887                                                |
| 0.001936649                                                  | 0.00469443                                    | 1                                                          |
| 0.002544982                                                  | 0.004161219                                   | 1                                                          |
| 0.0031561                                                    | 0.005821608                                   | 0.991453149                                                |
| 0.00332319                                                   | 0.005617092                                   | 1                                                          |
| 0.001715934                                                  | 0.004063331                                   | 1                                                          |
| 0.003957867                                                  | 0.006192646                                   | 1                                                          |
| 0.001603627                                                  | 0.003135297                                   | 0.996539803                                                |
| 0.001809635                                                  | 0.00338216                                    | 1                                                          |
| 0.001570232                                                  | 0.002497587                                   | 1                                                          |
| 0.004193115                                                  | 0.00646267                                    | 1                                                          |
| 0.001305344                                                  | 0.002994997                                   | 1                                                          |
| 0.001935395                                                  | 0.005321882                                   | 1                                                          |
| 0.002845079                                                  | 0.004930812                                   | 0.997959186                                                |
| 0.001570964                                                  | 0.00446562                                    | 1                                                          |
| 0.002492774                                                  | 0.004848047                                   | 1                                                          |
| 0.001556894                                                  | 0.003902044                                   | 1                                                          |
| 0.002625677                                                  | 0.004302226                                   | 1                                                          |
| 0.00145417                                                   | 0.002949916                                   | 1                                                          |
| 0.001496815                                                  | 0.003791471                                   | 0.98692867                                                 |
| 0.002149619                                                  | 0.004030869                                   | 0.998163454                                                |
| 0.002009464                                                  | 0.004179207                                   | 0.989279064                                                |
| 0.002885938                                                  | 0.005588791                                   | 1                                                          |
| 0.001604669                                                  | 0.003414408                                   | 0.998893806                                                |
| 0.001260223                                                  | 0.002475609                                   | 0.994755281                                                |
| 0.00327975                                                   | 0.006370872                                   | 1                                                          |
| 0.001702274                                                  | 0.002749954                                   | 1                                                          |
| 0.004228851                                                  | 0.007672352                                   | 1                                                          |
| 0.001162299                                                  | 0.003167271                                   | 0.993678951                                                |

| log.sigma.2.0.mm.3D_gldzm_LowIntensityEmphasis | log.sigma.2.0.mm.3D_gldzm_LargeDistanceEmphasis | log.sigma.2.0.mm.3D_gldzm_HighIntensitySmallDistanceEmphasis |
|------------------------------------------------|-------------------------------------------------|--------------------------------------------------------------|
| 0.00360815                                     | 1.009183673                                     | 689.7191327                                                  |
| 0.011085262                                    | 1                                               | 305.7509579                                                  |
| 0.01357049                                     | 1                                               | 259.5273973                                                  |
| 0.008475404                                    | 1                                               | 405.2142857                                                  |
| 0.00707483                                     | 1                                               | 368.6270023                                                  |
| 0.007013663                                    | 1                                               | 479.3024055                                                  |
| 0.003349207                                    | 1.009127789                                     | 497.1251268                                                  |
| 0.00484999                                     | 1.001903553                                     | 453.9811231                                                  |
| 0.004049978                                    | 1.003452244                                     | 479.7695627                                                  |
| 0.00801645                                     | 1                                               | 373.4125874                                                  |
| 0.009520678                                    | 1                                               | 248.4238532                                                  |
| 0.006012442                                    | 1.013636364                                     | 548.9744318                                                  |
| 0.007293902                                    | 1                                               | 412.5676329                                                  |
| 0.005019193                                    | 1                                               | 780.5709516                                                  |
| 0.006838005                                    | 1                                               | 482.5809285                                                  |
| 0.004139847                                    | 1                                               | 514.3975994                                                  |
| 0.006753416                                    | 1                                               | 331.9712644                                                  |
| 0.009264879                                    | 1                                               | 312.755102                                                   |
| 0.007014215                                    | 1                                               | 303.1909548                                                  |
| 0.004805721                                    | 1.007641365                                     | 504.7361182                                                  |
| 0.006271482                                    | 1                                               | 328.6216968                                                  |
| 0.008432396                                    | 1                                               | 291.4245524                                                  |
| 0.005986036                                    | 1                                               | 509.4592145                                                  |
| 0.005908368                                    | 1.003138075                                     | 339.3933054                                                  |
| 0.006638941                                    | 1                                               | 615.578341                                                   |
| 0.005582364                                    | 1                                               | 461.6183057                                                  |
| 0.005519895                                    | 1                                               | 465.8603175                                                  |
| 0.005592832                                    | 1                                               | 463.3205791                                                  |
| 0.0103345                                      | 1                                               | 267.5689482                                                  |
| 0.006852197                                    | 1                                               | 419.7656766                                                  |
| 0.004527101                                    | 1                                               | 581.8817481                                                  |
| 0.008043991                                    | 1                                               | 344.8456261                                                  |
| 0.005796502                                    | 1.005110733                                     | 439.9118399                                                  |
| 0.005371675                                    | 1                                               | 520.8552473                                                  |
| 0.003977372                                    | 1.017221584                                     | 482.7092423                                                  |
| 0.005239755                                    | 1.003496503                                     | 420.8371212                                                  |
| 0.002936839                                    | 1                                               | 790.4156456                                                  |
| 0.003046716                                    | 1                                               | 737.4959469                                                  |
| 0.006851235                                    | 1                                               | 396.2650602                                                  |
| 0.005650011                                    | 1.004169562                                     | 324.3858582                                                  |
| 0.010221757                                    | 1                                               | 288.6284953                                                  |
| 0.006435953                                    | 1.006185567                                     | 330.6015464                                                  |
| 0.004913733                                    | 1                                               | 451.3158273                                                  |
| 0.005307576                                    | 1.003                                           | 553.93325                                                    |
| 0.007660533                                    | 1                                               | 481.8382688                                                  |
| 0.00751741                                     | 1                                               | 352.163074                                                   |
| 0.005351701                                    | 1.003757044                                     | 454.6593613                                                  |
| 0.011101037                                    | 1                                               | 284.7251908                                                  |
| 0.0111268                                      | 1                                               | 339.193299                                                   |
| 0.008962069                                    | 1.007444169                                     | 324.9503722                                                  |
| 0.004197451                                    | 1.002887392                                     | 620.1571222                                                  |
| 0.004488409                                    | 1.001815981                                     | 461.3694007                                                  |
| 0.005439559                                    | 1                                               | 353.0981282                                                  |
| 0.009519666                                    | 1                                               | 290.8010753                                                  |
| 0.0051202                                      | 1                                               | 453.2865854                                                  |
| 0.010659462                                    | 1                                               | 346.1156894                                                  |
| 0.00440738                                     | 1.009019844                                     | 453.7784125                                                  |
| 0.004586347                                    | 1                                               | 490.2578558                                                  |
| 0.005552901                                    | 1                                               | 452.9454254                                                  |
| 0.00458187                                     | 1.005157593                                     | 473.7227794                                                  |
| 0.007958747                                    | 1                                               | 361.4794275                                                  |
| 0.003015752                                    | 1.002982107                                     | 719.3014414                                                  |
| 0.003343794                                    | 1.012436665                                     | 547.3513358                                                  |
| 0.004017981                                    | 1.017917133                                     | 517.4059351                                                  |
| 0.020556618                                    | 1                                               | 156.6733871                                                  |
| 0.005443473                                    | 1.017751479                                     | 467.3590448                                                  |
| 0.007019355                                    | 1                                               | 467.1898396                                                  |
| 0.003324718                                    | 1.013856813                                     | 543.0243649                                                  |
| 0.003880762                                    | 1                                               | 514.9200659                                                  |
| 0.004870114                                    | 1                                               | 427.2065789                                                  |
| 0.007628937                                    | 1                                               | 334.7628635                                                  |
| 0.003029348                                    | 1.009486166                                     | 692.4843874                                                  |
| 0.006890848                                    | 1                                               | 407.212548                                                   |
| 0.006245254                                    | 1                                               | 444.92                                                       |
| 0.007867675                                    | 1.012875536                                     | 323.7784335                                                  |
| 0.010164888                                    | 1                                               | 370.2484211                                                  |
| 0.006013529                                    | 1                                               | 341.4671233                                                  |
| 0.01427238                                     | 1                                               | 349.6131387                                                  |
| 0.005036951                                    | 1.005199307                                     | 459.7192374                                                  |
| 0.00462945                                     | 1                                               | 558.6860465                                                  |
| 0.003589838                                    | 1                                               | 700.1569892                                                  |
| 0.011640579                                    | 1                                               | 360.1007194                                                  |
| 0.00441129                                     | 1                                               | 489.3956563                                                  |
| 0.007300831                                    | 1                                               | 245.2879291                                                  |
| 0.007689094                                    | 1.003064351                                     | 391.8743616                                                  |
| 0.009266277                                    | 1                                               | 280.1971326                                                  |
| 0.007079262                                    | 1                                               | 370.4707135                                                  |
| 0.005559591                                    | 1                                               | 434.997819                                                   |
| 0.007889195                                    | 1                                               | 445.9921415                                                  |
| 0.005418614                                    | 1                                               | 501.8519164                                                  |
| 0.006645199                                    | 1.019736842                                     | 374.3782895                                                  |
| 0.005249937                                    | 1.002757353                                     | 405.7058824                                                  |
| 0.005767377                                    | 1.016168545                                     | 377.9118079                                                  |
| 0.009611601                                    | 1                                               | 321.179702                                                   |
| 0.004376026                                    | 1.00166021                                      | 416.5170172                                                  |
| 0.004055537                                    | 1.007887818                                     | 675.6932515                                                  |
| 0.010011002                                    | 1                                               | 281.7942913                                                  |
| 0.005195551                                    | 1                                               | 636.2231638                                                  |
| 0.016020244                                    | 1                                               | 212.5367965                                                  |
| 0.004568157                                    | 1.009511731                                     | 418.4324667                                                  |

| log.sigma.2.0.mm.3D_gldzm_LowIntensityLargeDistanceEmphasis | log.sigma.2.0.mm.3D_gldzm_HighIntensityEmphasis | log.sigma.2.0.mm.3D_gldzm_DistanceZoneVariability | log.sigma.2.0.mm.3D_gldzm_ZonePercentage |
|-------------------------------------------------------------|-------------------------------------------------|---------------------------------------------------|------------------------------------------|
| 0.003633661                                                 | 691.2642857                                     | 974.0183673                                       | 0.461828464                              |
| 0.011085262                                                 | 305.7509579                                     | 261                                               | 0.279144385                              |
| 0.01357049                                                  | 259.5273973                                     | 438                                               | 0.285528031                              |
| 0.008475404                                                 | 405.2142857                                     | 350                                               | 0.358239509                              |
| 0.00707483                                                  | 368.6270023                                     | 874                                               | 0.369087838                              |
| 0.007013663                                                 | 479.3024055                                     | 291                                               | 0.440909091                              |
| 0.003385603                                                 | 497.7636917                                     | 1960.036511                                       | 0.348964785                              |
| 0.004861253                                                 | 454.0615482                                     | 1574.001269                                       | 0.30853563                               |
| 0.004056812                                                 | 480.2882624                                     | 1734.004603                                       | 0.382314122                              |
| 0.00801645                                                  | 373.4125874                                     | 429                                               | 0.400186567                              |
| 0.009520678                                                 | 248.4238532                                     | 545                                               | 0.361405836                              |
| 0.006192966                                                 | 549.7636364                                     | 872.0363636                                       | 0.381778742                              |
| 0.007293902                                                 | 412.5676329                                     | 414                                               | 0.221746117                              |
| 0.005019193                                                 | 780.5709516                                     | 599                                               | 0.348864298                              |
| 0.006838005                                                 | 482.5809285                                     | 797                                               | 0.40171371                               |
| 0.004139847                                                 | 514.3975994                                     | 1333                                              | 0.304616088                              |
| 0.006753416                                                 | 331.9712644                                     | 522                                               | 0.43718593                               |
| 0.009264879                                                 | 312.755102                                      | 294                                               | 0.238442822                              |
| 0.007014215                                                 | 303.1909548                                     | 398                                               | 0.306625578                              |
| 0.004927612                                                 | 505.1456954                                     | 1953.025471                                       | 0.37757261                               |
| 0.006271482                                                 | 328.6216968                                     | 719                                               | 0.23776455                               |
| 0.008432396                                                 | 291.4245524                                     | 391                                               | 0.362372567                              |
| 0.005986036                                                 | 509.4592145                                     | 331                                               | 0.323242188                              |
| 0.005924379                                                 | 339.5470711                                     | 954.0020921                                       | 0.361163581                              |
| 0.006638941                                                 | 615.578341                                      | 434                                               | 0.340926944                              |
| 0.005582364                                                 | 461.6183057                                     | 1027                                              | 0.433516252                              |
| 0.005519895                                                 | 465.8603175                                     | 1260                                              | 0.3897309                                |
| 0.005592832                                                 | 463.3205791                                     | 967                                               | 0.350108617                              |
| 0.0103345                                                   | 267.5699482                                     | 193                                               | 0.431767338                              |
| 0.006852197                                                 | 419.7656766                                     | 606                                               | 0.29503408                               |
| 0.004527101                                                 | 581.8817481                                     | 1556                                              | 0.327028163                              |
| 0.008043991                                                 | 344.8456261                                     | 583                                               | 0.281778637                              |
| 0.006111979                                                 | 439.9693356                                     | 1170.006814                                       | 0.363580056                              |
| 0.005371675                                                 | 520.8552473                                     | 829                                               | 0.352765957                              |
| 0.004018821                                                 | 484.7801378                                     | 1722.114811                                       | 0.3955495                                |
| 0.005268652                                                 | 420.9428904                                     | 856.002331                                        | 0.286095365                              |
| 0.002936839                                                 | 790.4156456                                     | 1061                                              | 0.285138404                              |
| 0.003046716                                                 | 737.4959469                                     | 1357                                              | 0.26293354                               |
| 0.006851235                                                 | 396.2650602                                     | 415                                               | 0.337398374                              |
| 0.005687188                                                 | 324.5813065                                     | 2870.011119                                       | 0.395873453                              |
| 0.010221757                                                 | 288.6284953                                     | 751                                               | 0.289514264                              |
| 0.006475764                                                 | 331.1489691                                     | 1932.016495                                       | 0.50168089                               |
| 0.004913733                                                 | 451.3158273                                     | 1390                                              | 0.380509171                              |
| 0.005315887                                                 | 554.204                                         | 998.002                                           | 0.40192926                               |
| 0.007660533                                                 | 481.8382688                                     | 439                                               | 0.343505477                              |
| 0.00751741                                                  | 352.163074                                      | 1067                                              | 0.38870674                               |
| 0.005366377                                                 | 454.8998121                                     | 1593.005009                                       | 0.350065761                              |
| 0.011101037                                                 | 284.7251908                                     | 262                                               | 0.300803674                              |
| 0.0111268                                                   | 339.193299                                      | 388                                               | 0.455934195                              |
| 0.009000005                                                 | 325.3151365                                     | 401.0049628                                       | 0.298076923                              |
| 0.00420545                                                  | 620.4177093                                     | 1037.001925                                       | 0.404437524                              |
| 0.0044909                                                   | 461.7003632                                     | 1650.001211                                       | 0.490062296                              |
| 0.005439559                                                 | 353.0981282                                     | 1763                                              | 0.390735816                              |
| 0.009519666                                                 | 290.8010753                                     | 372                                               | 0.336956522                              |
| 0.0051202                                                   | 453.2865854                                     | 492                                               | 0.369924812                              |
| 0.010659462                                                 | 346.1156894                                     | 631                                               | 0.323589744                              |
| 0.004459606                                                 | 454.3926639                                     | 1653.030066                                       | 0.411124845                              |
| 0.004586347                                                 | 490.2578558                                     | 1082                                              | 0.312897629                              |
| 0.005552901                                                 | 452.9454254                                     | 623                                               | 0.378033981                              |
| 0.00459794                                                  | 474.2269341                                     | 3478.02063                                        | 0.382298171                              |
| 0.007958747                                                 | 361.4794275                                     | 559                                               | 0.316534541                              |
| 0.003020524                                                 | 719.7673956                                     | 1004.001988                                       | 0.376779026                              |
| 0.00340416                                                  | 548.528328                                      | 2153.07462                                        | 0.375021593                              |
| 0.004106384                                                 | 518.6360582                                     | 2647.191116                                       | 0.351436442                              |
| 0.020556618                                                 | 156.6733871                                     | 248                                               | 0.313924051                              |
| 0.006292445                                                 | 468.1065089                                     | 1169.08284                                        | 0.30631797                               |
| 0.007019355                                                 | 467.1898396                                     | 374                                               | 0.286809816                              |
| 0.003356291                                                 | 544.7394919                                     | 2145.092379                                       | 0.3464                                   |
| 0.003880762                                                 | 514.9200659                                     | 2427                                              | 0.41437596                               |
| 0.004870114                                                 | 427.2065789                                     | 760                                               | 0.262249827                              |
| 0.007628937                                                 | 334.7628635                                     | 447                                               | 0.344110855                              |
| 0.003054648                                                 | 693.4798419                                     | 1257.025296                                       | 0.294871795                              |
| 0.006890848                                                 | 407.212548                                      | 781                                               | 0.342694164                              |
| 0.006245254                                                 | 444.92                                          | 1000                                              | 0.442673749                              |
| 0.007954369                                                 | 324.4206009                                     | 1386.051502                                       | 0.446502715                              |
| 0.010164888                                                 | 370.2484211                                     | 475                                               | 0.353949329                              |
| 0.006013529                                                 | 341.4671233                                     | 730                                               | 0.304674457                              |
| 0.01427238                                                  | 349.6131387                                     | 274                                               | 0.286012526                              |
| 0.005057261                                                 | 460.0519931                                     | 575.0034662                                       | 0.338019918                              |
| 0.00462945                                                  | 558.6860465                                     | 1032                                              | 0.441214194                              |
| 0.003589838                                                 | 700.1569892                                     | 930                                               | 0.467571644                              |
| 0.011640579                                                 | 360.1007194                                     | 695                                               | 0.386325737                              |
| 0.00441129                                                  | 489.3956563                                     | 1059                                              | 0.323952279                              |
| 0.007300831                                                 | 245.2879291                                     | 903                                               | 0.293849658                              |
| 0.007698551                                                 | 392.1225741                                     | 977.0020429                                       | 0.401394014                              |
| 0.009266277                                                 | 280.1971326                                     | 279                                               | 0.182114883                              |
| 0.007079262                                                 | 370.4707135                                     | 939                                               | 0.393710692                              |
| 0.005559591                                                 | 434.997819                                      | 917                                               | 0.334427425                              |
| 0.007889195                                                 | 445.9921415                                     | 509                                               | 0.347677596                              |
| 0.005418614                                                 | 501.8519164                                     | 574                                               | 0.28345679                               |
| 0.006722296                                                 | 375.6414474                                     | 300.0263158                                       | 0.233128834                              |
| 0.005255634                                                 | 406.0395221                                     | 1086.001838                                       | 0.456759026                              |
| 0.005879258                                                 | 379.2229299                                     | 2019.118569                                       | 0.393787382                              |
| 0.009611601                                                 | 321.179702                                      | 1074                                              | 0.325454545                              |
| 0.004383405                                                 | 416.610404                                      | 1805.001107                                       | 0.415211397                              |
| 0.004077813                                                 | 676.4425942                                     | 1135.015776                                       | 0.333430742                              |
| 0.010011002                                                 | 281.7942913                                     | 1016                                              | 0.360667377                              |
| 0.005195551                                                 | 636.2231638                                     | 354                                               | 0.338108883                              |
| 0.016020244                                                 | 212.5367965                                     | 231                                               | 0.276978417                              |
| 0.004605631                                                 | 419.1686747                                     | 1567.031706                                       | 0.273120887                              |

| log.sigma.2.0.mm.3D_gldzm_IntensityVariabilityNormalized | log.sigma.2.0.mm.3D_gldzm_LowIntensitySmallDistanceEmphasis | log.sigma.2.0.mm.3D_gldzm_IntensityVariability |
|----------------------------------------------------------|-------------------------------------------------------------|------------------------------------------------|
| 0.041720117                                              | 0.003601773                                                 | 40.88571429                                    |
| 0.062433024                                              | 0.011085262                                                 | 16.29501916                                    |
| 0.056764871                                              | 0.01357049                                                  | 24.8630137                                     |
| 0.04757551                                               | 0.008475404                                                 | 16.65142857                                    |
| 0.052249318                                              | 0.00707483                                                  | 45.66590389                                    |
| 0.046019768                                              | 0.007013663                                                 | 13.39175258                                    |
| 0.052686392                                              | 0.003340109                                                 | 103.8975659                                    |
| 0.050486034                                              | 0.004847174                                                 | 79.56589885                                    |
| 0.049840365                                              | 0.00404827                                                  | 86.62255466                                    |
| 0.051700436                                              | 0.00801645                                                  | 22.17948718                                    |
| 0.064617456                                              | 0.009520678                                                 | 35.21651376                                    |
| 0.048396178                                              | 0.005967311                                                 | 42.58863636                                    |
| 0.057667624                                              | 0.007293902                                                 | 23.87439614                                    |
| 0.044657066                                              | 0.005019193                                                 | 26.74958264                                    |
| 0.045721959                                              | 0.006838005                                                 | 36.44040151                                    |
| 0.055181275                                              | 0.004139847                                                 | 73.55663916                                    |
| 0.054175658                                              | 0.006753416                                                 | 28.27969349                                    |
| 0.061640983                                              | 0.009264879                                                 | 18.12244898                                    |
| 0.070149744                                              | 0.007014215                                                 | 27.91959799                                    |
| 0.047734074                                              | 0.004775249                                                 | 93.70198675                                    |
| 0.061561704                                              | 0.006271482                                                 | 44.26286509                                    |
| 0.062041719                                              | 0.008432396                                                 | 24.25831202                                    |
| 0.055101724                                              | 0.005986036                                                 | 18.23867069                                    |
| 0.057023687                                              | 0.005904366                                                 | 54.51464435                                    |
| 0.051317718                                              | 0.006638941                                                 | 22.2718894                                     |
| 0.045187911                                              | 0.005582364                                                 | 46.40798442                                    |
| 0.044543966                                              | 0.005519895                                                 | 56.12539683                                    |
| 0.051249667                                              | 0.005592832                                                 | 49.55842813                                    |
| 0.067142742                                              | 0.0103345                                                   | 12.95854922                                    |
| 0.060337222                                              | 0.006852197                                                 | 36.56435644                                    |
| 0.052503453                                              | 0.004527101                                                 | 81.69537275                                    |
| 0.055138589                                              | 0.008043991                                                 | 32.1457976                                     |
| 0.046180881                                              | 0.005717632                                                 | 54.21635434                                    |
| 0.047492801                                              | 0.005371675                                                 | 39.37153197                                    |
| 0.048410908                                              | 0.00396701                                                  | 84.33180253                                    |
| 0.056158682                                              | 0.005232531                                                 | 48.18414918                                    |
| 0.04957978                                               | 0.002936839                                                 | 52.60414703                                    |
| 0.048745852                                              | 0.003046716                                                 | 66.14812085                                    |
| 0.066709247                                              | 0.006851235                                                 | 27.68433735                                    |
| 0.051821322                                              | 0.005640717                                                 | 149.1417651                                    |
| 0.056203801                                              | 0.010221757                                                 | 42.20905459                                    |
| 0.047268041                                              | 0.006426001                                                 | 91.7                                           |
| 0.050517054                                              | 0.004913733                                                 | 70.21870504                                    |
| 0.046182                                                 | 0.005305499                                                 | 46.182                                         |
| 0.053543724                                              | 0.007660533                                                 | 23.50569476                                    |
| 0.050682088                                              | 0.00751741                                                  | 54.07778819                                    |
| 0.051205513                                              | 0.005348032                                                 | 81.77520351                                    |
| 0.063924014                                              | 0.011101037                                                 | 16.7480916                                     |
| 0.047401424                                              | 0.0111268                                                   | 18.39175258                                    |
| 0.057022702                                              | 0.008952574                                                 | 22.98014888                                    |
| 0.046710532                                              | 0.004195452                                                 | 48.53224254                                    |
| 0.047314443                                              | 0.004487786                                                 | 78.16343826                                    |
| 0.054687824                                              | 0.005439559                                                 | 96.41463415                                    |
| 0.056625043                                              | 0.009519666                                                 | 21.06451613                                    |
| 0.053803953                                              | 0.0051202                                                   | 26.47154472                                    |
| 0.055171149                                              | 0.010659462                                                 | 34.81299525                                    |
| 0.050251865                                              | 0.004394323                                                 | 83.56885147                                    |
| 0.051515131                                              | 0.004586347                                                 | 55.73937153                                    |
| 0.051918306                                              | 0.005552901                                                 | 32.34510433                                    |
| 0.048472673                                              | 0.004577853                                                 | 169.1696275                                    |
| 0.049542212                                              | 0.007958747                                                 | 27.6940966                                     |
| 0.05237956                                               | 0.003014559                                                 | 52.69383698                                    |
| 0.050374891                                              | 0.003328702                                                 | 109.3638876                                    |
| 0.049395705                                              | 0.00399588                                                  | 132.3310937                                    |
| 0.069719043                                              | 0.020556618                                                 | 17.29032258                                    |
| 0.050749238                                              | 0.00523123                                                  | 60.03634827                                    |
| 0.056392805                                              | 0.007019355                                                 | 21.09090909                                    |
| 0.049852311                                              | 0.003316825                                                 | 107.930254                                     |
| 0.051633279                                              | 0.003880762                                                 | 125.3139679                                    |
| 0.062583102                                              | 0.004870114                                                 | 47.56315789                                    |
| 0.056959396                                              | 0.007628937                                                 | 25.46085011                                    |
| 0.051508382                                              | 0.003023022                                                 | 65.15810277                                    |
| 0.04797192                                               | 0.006890848                                                 | 37.46606914                                    |
| 0.04383                                                  | 0.006245254                                                 | 43.83                                          |
| 0.047856022                                              | 0.007846001                                                 | 66.90271817                                    |
| 0.05454626                                               | 0.010164888                                                 | 25.90947368                                    |
| 0.059324451                                              | 0.006013529                                                 | 43.30684932                                    |
| 0.054584688                                              | 0.01427238                                                  | 14.95620438                                    |
| 0.061157184                                              | 0.005031873                                                 | 35.28769497                                    |
| 0.046840259                                              | 0.00462945                                                  | 48.33914729                                    |
| 0.041953983                                              | 0.003589838                                                 | 39.0172043                                     |
| 0.045391025                                              | 0.011640579                                                 | 31.54676259                                    |
| 0.050814057                                              | 0.00441129                                                  | 53.81208687                                    |
| 0.065926425                                              | 0.007300831                                                 | 59.53156146                                    |
| 0.04818763                                               | 0.007686729                                                 | 47.17568948                                    |
| 0.080638738                                              | 0.009266277                                                 | 22.49820789                                    |
| 0.047040957                                              | 0.007079262                                                 | 44.171459                                      |
| 0.052450442                                              | 0.005559591                                                 | 48.09705562                                    |
| 0.059560524                                              | 0.007889195                                                 | 30.31630648                                    |
| 0.056167976                                              | 0.005418614                                                 | 32.24041812                                    |
| 0.07217365                                               | 0.006625925                                                 | 21.94078947                                    |
| 0.052241025                                              | 0.005248513                                                 | 56.83823529                                    |
| 0.048894046                                              | 0.005739407                                                 | 99.79274865                                    |
| 0.054667804                                              | 0.009611601                                                 | 58.7132216                                     |
| 0.052439799                                              | 0.004374181                                                 | 94.7587161                                     |
| 0.044815924                                              | 0.004049968                                                 | 51.13496933                                    |
| 0.054699609                                              | 0.010011002                                                 | 55.57480315                                    |
| 0.050480386                                              | 0.005195551                                                 | 17.8700565                                     |
| 0.065759637                                              | 0.016020244                                                 | 15.19047619                                    |
| 0.056697638                                              | 0.004558789                                                 | 89.41217502                                    |

| log.sigma.2.0.mm.3D_gldzm_HighIntensityLargeDistanceEmphasis | log.sigma.2.0.mm.3D_gldzm_SmallDistanceEmphasis | log.sigma.2.0.mm.3D_glcm_SumVariance | log.sigma.2.0.mm.3D_glcm_Homogeneity1 |
|--------------------------------------------------------------|-------------------------------------------------|--------------------------------------|---------------------------------------|
| 697.444898                                                   | 0.997704082                                     | 2351.427288                          | 0.29647428                            |
| 305.7509579                                                  | 1                                               | 920.6813037                          | 0.432269432                           |
| 259.5273973                                                  | 1                                               | 682.7877558                          | 0.429526302                           |
| 405.2142857                                                  | 1                                               | 1435.333933                          | 0.35191472                            |
| 368.6270023                                                  | 1                                               | 1204.460582                          | 0.353871073                           |
| 479.3024055                                                  | 1                                               | 1386.545318                          | 0.317806064                           |
| 500.3179513                                                  | 0.997718053                                     | 1540.457708                          | 0.381199016                           |
| 454.3832487                                                  | 0.999524112                                     | 1403.58083                           | 0.400696126                           |
| 482.363061                                                   | 0.999136939                                     | 1560.486572                          | 0.34891237                            |
| 373.4125874                                                  | 1                                               | 1185.499916                          | 0.353504862                           |
| 248.4238532                                                  | 1                                               | 762.4221275                          | 0.379132407                           |
| 552.9204545                                                  | 0.996590909                                     | 1757.305816                          | 0.347994929                           |
| 412.5676329                                                  | 1                                               | 1346.138467                          | 0.472297271                           |
| 780.5709516                                                  | 1                                               | 2615.764944                          | 0.350115136                           |
| 482.5809285                                                  | 1                                               | 1544.641565                          | 0.336083831                           |
| 514.3975994                                                  | 1                                               | 1651.411436                          | 0.403495583                           |
| 331.9712644                                                  | 1                                               | 984.5708081                          | 0.322812157                           |
| 312.755102                                                   | 1                                               | 1016.796698                          | 0.443367921                           |
| 303.1909548                                                  | 1                                               | 981.8058065                          | 0.39203903                            |
| 506.7840041                                                  | 0.998089659                                     | 1539.970127                          | 0.353262832                           |
| 328.6216968                                                  | 1                                               | 988.8013168                          | 0.46095194                            |
| 291.4245524                                                  | 1                                               | 895.0962454                          | 0.364256734                           |
| 509.4592145                                                  | 1                                               | 1680.651075                          | 0.37832577                            |
| 340.1621339                                                  | 0.999215481                                     | 1031.829986                          | 0.37669805                            |
| 615.578341                                                   | 1                                               | 1967.471108                          | 0.384236788                           |
| 461.6183057                                                  | 1                                               | 1305.748128                          | 0.321976467                           |
| 465.8603175                                                  | 1                                               | 1398.987735                          | 0.336385656                           |
| 463.3205791                                                  | 1                                               | 1495.981681                          | 0.366468354                           |
| 267.5699482                                                  | 1                                               | 770.5542568                          | 0.338050088                           |
| 419.7656766                                                  | 1                                               | 1387.04154                           | 0.389905128                           |
| 581.8817481                                                  | 1                                               | 1903.802253                          | 0.396253745                           |
| 344.8456261                                                  | 1                                               | 1167.107928                          | 0.405732316                           |
| 440.1993186                                                  | 0.998722317                                     | 1328.782333                          | 0.349982871                           |
| 520.8552473                                                  | 1                                               | 1673.930884                          | 0.377246673                           |
| 493.0637199                                                  | 0.995694604                                     | 1454.342979                          | 0.346899282                           |
| 421.3659674                                                  | 0.999125874                                     | 1255.019928                          | 0.415007213                           |
| 790.4156456                                                  | 1                                               | 2711.846601                          | 0.404127516                           |
| 737.4959469                                                  | 1                                               | 2362.218827                          | 0.454144639                           |
| 396.2650602                                                  | 1                                               | 1355.726705                          | 0.357850026                           |
| 325.3630994                                                  | 0.998957609                                     | 947.9089234                          | 0.330136227                           |
| 288.6284953                                                  | 1                                               | 933.371958                           | 0.394558648                           |
| 333.3386598                                                  | 0.998453608                                     | 938.3363403                          | 0.280304992                           |
| 451.3158273                                                  | 1                                               | 1408.302644                          | 0.348684418                           |
| 555.287                                                      | 0.99925                                         | 1811.844019                          | 0.327579514                           |
| 481.8382688                                                  | 1                                               | 1483.166496                          | 0.369440606                           |
| 352.163074                                                   | 1                                               | 1036.111607                          | 0.357365215                           |
| 455.8616155                                                  | 0.999060739                                     | 1391.373231                          | 0.367812758                           |
| 284.7251908                                                  | 1                                               | 897.4304582                          | 0.406698487                           |
| 339.193299                                                   | 1                                               | 1019.631518                          | 0.312904885                           |
| 326.7741935                                                  | 0.998138958                                     | 937.1412124                          | 0.407424679                           |
| 621.4600577                                                  | 0.999278152                                     | 1975.800325                          | 0.330851208                           |
| 463.0242131                                                  | 0.999546005                                     | 1381.826207                          | 0.290662076                           |
| 353.0981282                                                  | 1                                               | 1102.687668                          | 0.336592721                           |
| 290.8010753                                                  | 1                                               | 844.9997383                          | 0.372963811                           |
| 453.2865854                                                  | 1                                               | 1444.810296                          | 0.353571219                           |
| 346.1156894                                                  | 1                                               | 1108.795034                          | 0.374056574                           |
| 456.8496693                                                  | 0.997745039                                     | 1409.28029                           | 0.331225071                           |
| 490.2578558                                                  | 1                                               | 1603.634939                          | 0.382538377                           |
| 452.9454254                                                  | 1                                               | 1479.462078                          | 0.350427603                           |
| 476.243553                                                   | 0.998710602                                     | 1451.041717                          | 0.346327654                           |
| 361.4794275                                                  | 1                                               | 1114.060587                          | 0.417741704                           |
| 721.6312127                                                  | 0.999254473                                     | 2472.089181                          | 0.359525044                           |
| 553.2362966                                                  | 0.996890834                                     | 1750.254466                          | 0.365588702                           |
| 523.556551                                                   | 0.995520717                                     | 1625.183729                          | 0.358789874                           |
| 156.6733871                                                  | 1                                               | 405.7383984                          | 0.39915824                            |
| 471.0963652                                                  | 0.99556213                                      | 1467.290111                          | 0.398713938                           |
| 467.1898396                                                  | 1                                               | 1599.211276                          | 0.398902695                           |
| 551.6                                                        | 0.996535797                                     | 1798.609129                          | 0.364641837                           |
| 514.9200659                                                  | 1                                               | 1732.848159                          | 0.352762511                           |
| 427.2065789                                                  | 1                                               | 1394.432816                          | 0.421800301                           |
| 334.7628635                                                  | 1                                               | 1095.805319                          | 0.369436193                           |
| 697.4616601                                                  | 0.997628458                                     | 2296.889842                          | 0.40355707                            |
| 407.212548                                                   | 1                                               | 1245.888566                          | 0.374928692                           |
| 444.92                                                       | 1                                               | 1418.511839                          | 0.302010135                           |
| 326.9892704                                                  | 0.996781116                                     | 940.5874704                          | 0.304364427                           |
| 370.2484211                                                  | 1                                               | 1213.058318                          | 0.364817661                           |
| 341.4671233                                                  | 1                                               | 1022.441404                          | 0.398362575                           |
| 349.6131387                                                  | 1                                               | 1112.153579                          | 0.395329637                           |
| 461.3830156                                                  | 0.998700173                                     | 1510.903662                          | 0.368327284                           |
| 558.6860465                                                  | 1                                               | 1747.025536                          | 0.310496512                           |
| 700.1569892                                                  | 1                                               | 2360.992885                          | 0.304678509                           |
| 360.1007194                                                  | 1                                               | 1135.10961                           | 0.354396496                           |
| 489.3956563                                                  | 1                                               | 1537.664691                          | 0.401613229                           |
| 245.2879291                                                  | 1                                               | 737.4400754                          | 0.397291841                           |
| 393.1154239                                                  | 0.999233912                                     | 1205.223178                          | 0.331563184                           |
| 280.1971326                                                  | 1                                               | 959.8914841                          | 0.512644678                           |
| 370.4707135                                                  | 1                                               | 1134.112574                          | 0.341041123                           |
| 434.997819                                                   | 1                                               | 1323.585671                          | 0.382341693                           |
| 445.9921415                                                  | 1                                               | 1394.877809                          | 0.381896357                           |
| 501.8519164                                                  | 1                                               | 1682.46913                           | 0.412126929                           |
| 380.6940789                                                  | 0.995065789                                     | 1143.445169                          | 0.482247075                           |
| 407.3740809                                                  | 0.999310662                                     | 1200.228005                          | 0.306843772                           |
| 384.4674179                                                  | 0.995957864                                     | 1161.004702                          | 0.3316277                             |
| 321.179702                                                   | 1                                               | 1019.773252                          | 0.388962479                           |
| 416.9839513                                                  | 0.999584947                                     | 1296.215451                          | 0.321993253                           |
| 679.4399649                                                  | 0.998028046                                     | 2225.077498                          | 0.388484468                           |
| 281.7942913                                                  | 1                                               | 822.843068                           | 0.363879006                           |
| 636.2231638                                                  | 1                                               | 2250.20535                           | 0.374487751                           |
| 212.5367965                                                  | 1                                               | 692.8635373                          | 0.418254472                           |
| 422.1135067                                                  | 0.997622067                                     | 1271.101564                          | 0.434056816                           |

| log.sigma.2.0.mm.3D_glcmm_Homogeneity2 | log.sigma.2.0.mm.3D_glcmm_ClusterShade | log.sigma.2.0.mm.3D_glcmm_MaximumProbability | log.sigma.2.0.mm.3D_glcmm_Ldmn | log.sigma.2.0.mm.3D_glcmm_SumVariance2 |
|----------------------------------------|----------------------------------------|----------------------------------------------|--------------------------------|----------------------------------------|
| 0.211768686                            | -773.8914897                           | 0.01938054                                   | 0.969975727                    | 83.89035526                            |
| 0.361281118                            | 17.60840271                            | 0.07391566                                   | 0.983531015                    | 28.1807912                             |
| 0.357684084                            | 38.95715121                            | 0.067131868                                  | 0.982419039                    | 30.84872467                            |
| 0.273228411                            | -345.4931052                           | 0.039391746                                  | 0.969962872                    | 59.11064268                            |
| 0.271075404                            | -160.0857647                           | 0.040259518                                  | 0.976238269                    | 40.15139448                            |
| 0.230503937                            | 184.1566122                            | 0.02448381                                   | 0.977010701                    | 62.81796421                            |
| 0.301457085                            | 15.0684299                             | 0.045341665                                  | 0.987054685                    | 38.87865909                            |
| 0.326213976                            | -48.80396334                           | 0.049922708                                  | 0.984006793                    | 37.64209583                            |
| 0.266827357                            | -171.3797342                           | 0.023023865                                  | 0.980146341                    | 47.08003489                            |
| 0.269529232                            | -185.27651                             | 0.031334376                                  | 0.975928242                    | 41.37065225                            |
| 0.296068288                            | -68.11721781                           | 0.030434241                                  | 0.978168667                    | 29.0690028                             |
| 0.266323518                            | -305.723287                            | 0.024002172                                  | 0.977331401                    | 57.12867376                            |
| 0.411273296                            | -45.5967959                            | 0.116973352                                  | 0.986068313                    | 29.32891813                            |
| 0.267997672                            | -456.6004224                           | 0.034901335                                  | 0.981217777                    | 59.7143377                             |
| 0.255307989                            | -373.4074311                           | 0.02396827                                   | 0.974440016                    | 61.88450616                            |
| 0.330138746                            | -101.1314829                           | 0.048689236                                  | 0.983332803                    | 40.79671083                            |
| 0.232957499                            | -92.42998795                           | 0.018395848                                  | 0.969942697                    | 42.98758034                            |
| 0.375653631                            | 15.45265483                            | 0.068378761                                  | 0.984104235                    | 29.05933597                            |
| 0.309890044                            | 11.74573652                            | 0.03455921                                   | 0.987168478                    | 22.24005818                            |
| 0.270211058                            | -50.38346575                           | 0.029519399                                  | 0.982055045                    | 49.43825401                            |
| 0.395372841                            | 13.97828161                            | 0.081499098                                  | 0.986477984                    | 24.60142703                            |
| 0.277716023                            | -45.11957785                           | 0.030826009                                  | 0.977975009                    | 28.28900508                            |
| 0.298413262                            | -77.45859687                           | 0.035800283                                  | 0.980453457                    | 35.19943623                            |
| 0.294561664                            | -9.034861105                           | 0.028265415                                  | 0.978328499                    | 33.79604944                            |
| 0.306714083                            | -97.3046534                            | 0.046912344                                  | 0.983680161                    | 45.94422844                            |
| 0.234589627                            | -6.960534422                           | 0.018824837                                  | 0.977329932                    | 65.80595149                            |
| 0.253426086                            | -49.33075642                           | 0.024654536                                  | 0.975056316                    | 57.44048576                            |
| 0.285402127                            | -189.5851226                           | 0.0307501                                    | 0.979046585                    | 40.96738205                            |
| 0.245834699                            | 22.80298483                            | 0.025593066                                  | 0.97178242                     | 29.97564749                            |
| 0.310303431                            | -97.5627826                            | 0.044720115                                  | 0.982972004                    | 27.85690419                            |
| 0.320934241                            | -158.7681492                           | 0.048948382                                  | 0.987526027                    | 43.75659952                            |
| 0.332860318                            | -193.9199373                           | 0.047801093                                  | 0.974573509                    | 31.66079498                            |
| 0.269151042                            | -117.282681                            | 0.025299903                                  | 0.980221054                    | 61.73380281                            |
| 0.301348126                            | -331.8560032                           | 0.040842799                                  | 0.976068174                    | 54.26028843                            |
| 0.26339558                             | -56.1201789                            | 0.027660384                                  | 0.982958233                    | 51.53874741                            |
| 0.341731777                            | -33.82492465                           | 0.057075641                                  | 0.985716914                    | 33.23437324                            |
| 0.331952028                            | -179.2637858                           | 0.054203641                                  | 0.988193838                    | 40.75635544                            |
| 0.391593392                            | -137.9413886                           | 0.103513935                                  | 0.990109993                    | 42.41102003                            |
| 0.271428132                            | -136.5174753                           | 0.027105338                                  | 0.975006342                    | 24.16006299                            |
| 0.241414942                            | -31.27955026                           | 0.014956588                                  | 0.976899998                    | 45.11920802                            |
| 0.318127717                            | -181.6181434                           | 0.044614232                                  | 0.978100917                    | 36.71720498                            |
| 0.188842293                            | 31.14848245                            | 0.011036076                                  | 0.970869504                    | 61.8128747                             |
| 0.264450267                            | -109.8959743                           | 0.028399099                                  | 0.978676534                    | 46.04489051                            |
| 0.244211636                            | -390.2800661                           | 0.027196476                                  | 0.976593739                    | 59.5748991                             |
| 0.288910346                            | -80.06162112                           | 0.031511961                                  | 0.979469097                    | 42.87277635                            |
| 0.273508792                            | -42.92646538                           | 0.03513795                                   | 0.982528943                    | 40.83004535                            |
| 0.286747322                            | -31.97968578                           | 0.034206526                                  | 0.982588124                    | 42.90517955                            |
| 0.328797314                            | -35.71902393                           | 0.044705114                                  | 0.983767774                    | 24.17345058                            |
| 0.224525824                            | -238.0574301                           | 0.023997086                                  | 0.967727949                    | 52.56075346                            |
| 0.331007516                            | 70.73770433                            | 0.051691241                                  | 0.983591307                    | 35.16177222                            |
| 0.244738012                            | -230.1766561                           | 0.023405712                                  | 0.980131838                    | 59.15478318                            |
| 0.200936226                            | -57.47912283                           | 0.013363268                                  | 0.977205556                    | 63.31923539                            |
| 0.248341538                            | -66.23826578                           | 0.024973739                                  | 0.978303746                    | 36.12123422                            |
| 0.289060812                            | 48.93774296                            | 0.034162906                                  | 0.979924476                    | 33.93709168                            |
| 0.267769078                            | 8.710647353                            | 0.02606051                                   | 0.980502671                    | 40.07024942                            |
| 0.291359911                            | -163.5407908                           | 0.033495613                                  | 0.979196563                    | 34.2570178                             |
| 0.244683081                            | -133.7645316                           | 0.023269823                                  | 0.9742246                      | 46.20917428                            |
| 0.304947337                            | -211.8816893                           | 0.035175499                                  | 0.982646753                    | 41.54617081                            |
| 0.26763515                             | -164.2237723                           | 0.025815344                                  | 0.979751396                    | 41.25899832                            |
| 0.2660528                              | -166.4330654                           | 0.030602876                                  | 0.97629521                     | 52.34247128                            |
| 0.347565133                            | 44.04305971                            | 0.069325971                                  | 0.982901617                    | 34.61768402                            |
| 0.278702436                            | -231.9283202                           | 0.033864939                                  | 0.981791937                    | 45.91197959                            |
| 0.285855834                            | -108.8231665                           | 0.038111842                                  | 0.980065633                    | 48.91616684                            |
| 0.275854057                            | -41.29789226                           | 0.02575701                                   | 0.982135651                    | 44.54525678                            |
| 0.319329725                            | -11.75929126                           | 0.040226314                                  | 0.977252345                    | 24.90641141                            |
| 0.324272237                            | -154.5384164                           | 0.047114193                                  | 0.982330644                    | 37.44650386                            |
| 0.324634184                            | -174.9309942                           | 0.048502691                                  | 0.980983063                    | 29.23846337                            |
| 0.284957727                            | -134.2019265                           | 0.034523566                                  | 0.983810632                    | 47.99964956                            |
| 0.269203042                            | -206.9302694                           | 0.024278212                                  | 0.984720262                    | 47.17162451                            |
| 0.34717937                             | -45.11302842                           | 0.062141962                                  | 0.985244752                    | 21.59235972                            |
| 0.287117539                            | -124.3314766                           | 0.040944033                                  | 0.977100861                    | 35.36067391                            |
| 0.328746998                            | -111.8057766                           | 0.044390062                                  | 0.988209666                    | 42.03327166                            |
| 0.29739668                             | -166.0335475                           | 0.035164973                                  | 0.980158964                    | 44.7079302                             |
| 0.217118659                            | -309.5454704                           | 0.018812525                                  | 0.966663987                    | 68.22613566                            |
| 0.215454966                            | -31.50606582                           | 0.017655691                                  | 0.971630912                    | 51.94838802                            |
| 0.28316397                             | -317.1742345                           | 0.041177012                                  | 0.976023589                    | 37.47819709                            |
| 0.317684992                            | 41.21755123                            | 0.039170384                                  | 0.987988407                    | 24.91394315                            |
| 0.317803822                            | -87.61046889                           | 0.048295444                                  | 0.980415665                    | 37.20906045                            |
| 0.283709251                            | -71.46541599                           | 0.032081846                                  | 0.98266595                     | 30.78307217                            |
| 0.224339706                            | -399.1735582                           | 0.015720655                                  | 0.977574524                    | 69.91054811                            |
| 0.220277665                            | -752.2479402                           | 0.020597454                                  | 0.97151298                     | 82.49963784                            |
| 0.276158789                            | -160.4877336                           | 0.031952004                                  | 0.971486728                    | 45.78102642                            |
| 0.328070809                            | -41.20367731                           | 0.050675016                                  | 0.982064097                    | 38.73614051                            |
| 0.315882641                            | -58.76358691                           | 0.032626088                                  | 0.977934171                    | 25.70918479                            |
| 0.248072663                            | -165.2661197                           | 0.023592897                                  | 0.974306238                    | 53.1083414                             |
| 0.455658838                            | -14.21459841                           | 0.114556376                                  | 0.989299619                    | 15.78644425                            |
| 0.260260651                            | -279.1644927                           | 0.030229377                                  | 0.97441481                     | 54.59376809                            |
| 0.303259921                            | -55.25675438                           | 0.048242039                                  | 0.979904075                    | 38.82779478                            |
| 0.301581138                            | -163.5952551                           | 0.038661824                                  | 0.980802532                    | 35.52421415                            |
| 0.338923738                            | -161.6103342                           | 0.053995398                                  | 0.983663667                    | 33.85304328                            |
| 0.419460492                            | 85.31284758                            | 0.110010183                                  | 0.989908313                    | 21.43383275                            |
| 0.214945144                            | -26.6351114                            | 0.016475451                                  | 0.975919838                    | 46.77541072                            |
| 0.246228947                            | -159.3840164                           | 0.019920089                                  | 0.978516615                    | 49.27230901                            |
| 0.310613916                            | -161.6653891                           | 0.04152153                                   | 0.975375225                    | 39.96381526                            |
| 0.234154679                            | -122.4119738                           | 0.017590696                                  | 0.977208014                    | 43.73157446                            |
| 0.315725433                            | -365.4773352                           | 0.052369792                                  | 0.981153078                    | 59.74322901                            |
| 0.280477371                            | -73.5976674                            | 0.027708738                                  | 0.978878808                    | 38.23124554                            |
| 0.297722137                            | -350.2138272                           | 0.038355114                                  | 0.980900917                    | 46.71263794                            |
| 0.34389553                             | -119.8669048                           | 0.048640908                                  | 0.972959052                    | 24.19930292                            |
| 0.36429403                             | 59.18442424                            | 0.068141056                                  | 0.98746421                     | 28.12062956                            |

| log.sigma.2.0.mm.3D_glc_m_Contrast | log.sigma.2.0.mm.3D_glc_m_DifferenceEntropy | log.sigma.2.0.mm.3D_glc_m_InverseVariance | log.sigma.2.0.mm.3D_glc_m_Entropy | log.sigma.2.0.mm.3D_glc_m_Dissimilarity |
|------------------------------------|---------------------------------------------|-------------------------------------------|-----------------------------------|-----------------------------------------|
| 60.80092146                        | 3.958002522                                 | 0.214867384                               | 8.428765679                       | 5.533255319                             |
| 16.55584303                        | 3.034102024                                 | 0.344681464                               | 6.566025828                       | 2.733518215                             |
| 16.30997119                        | 3.062058039                                 | 0.332468137                               | 6.896311483                       | 2.777444199                             |
| 40.52962983                        | 3.627141963                                 | 0.267138786                               | 7.72338031                        | 4.36037682                              |
| 29.02997032                        | 3.476750332                                 | 0.273415787                               | 7.553086769                       | 3.843378776                             |
| 36.39332961                        | 3.611674644                                 | 0.23703271                                | 7.657265447                       | 4.455173341                             |
| 23.21972521                        | 3.342200358                                 | 0.288505681                               | 7.591590174                       | 3.418126702                             |
| 24.02400657                        | 3.30618228                                  | 0.312214699                               | 7.305334127                       | 3.313474731                             |
| 33.17145277                        | 3.564801002                                 | 0.26519522                                | 7.953979005                       | 4.08149204                              |
| 27.63767743                        | 3.418606702                                 | 0.278901698                               | 7.402682806                       | 3.755512052                             |
| 18.90105916                        | 3.201751489                                 | 0.298515621                               | 7.20036781                        | 3.168812462                             |
| 39.1708048                         | 3.609389094                                 | 0.26753208                                | 7.811947645                       | 4.260236634                             |
| 18.23378911                        | 2.969879807                                 | 0.363883213                               | 6.334140131                       | 2.601749735                             |
| 39.42924579                        | 3.585423965                                 | 0.267260655                               | 7.757070245                       | 4.207989567                             |
| 48.95372705                        | 3.732382115                                 | 0.257112315                               | 7.919906193                       | 4.749645785                             |
| 25.45473028                        | 3.305405157                                 | 0.318078099                               | 7.371339039                       | 3.333900403                             |
| 30.5662572                         | 3.523777084                                 | 0.243828519                               | 7.83474884                        | 4.11755223                              |
| 15.76419022                        | 2.99877784                                  | 0.356079256                               | 6.583680263                       | 2.654892883                             |
| 15.73615951                        | 3.10040013                                  | 0.304906013                               | 6.909790585                       | 2.93243782                              |
| 29.8424909                         | 3.494118796                                 | 0.272095243                               | 7.848754213                       | 3.873976971                             |
| 13.27725692                        | 2.914347414                                 | 0.361348444                               | 6.606911238                       | 2.437408238                             |
| 18.82698337                        | 3.22448873                                  | 0.2832048                                 | 7.208173079                       | 3.267312941                             |
| 25.43496565                        | 3.32429297                                  | 0.298183371                               | 7.204258908                       | 3.467137868                             |
| 21.71718836                        | 3.291804092                                 | 0.290964515                               | 7.481316914                       | 3.336799669                             |
| 29.63279172                        | 3.356248258                                 | 0.301671588                               | 7.249431888                       | 3.569468137                             |
| 38.28345927                        | 3.662966637                                 | 0.235361057                               | 8.192198529                       | 4.464004577                             |
| 38.68728977                        | 3.651737821                                 | 0.256058624                               | 8.136000693                       | 4.3748841                               |
| 29.06658497                        | 3.421061537                                 | 0.290797981                               | 7.529826413                       | 3.695909935                             |
| 20.95367315                        | 3.27614166                                  | 0.250439663                               | 7.151112277                       | 3.55799121                              |
| 20.37328094                        | 3.221521181                                 | 0.308741208                               | 7.01587771                        | 3.168450466                             |
| 27.58474262                        | 3.353200858                                 | 0.306166531                               | 7.426096914                       | 3.453489139                             |
| 25.04299933                        | 3.274259962                                 | 0.323541053                               | 7.062527921                       | 3.299662814                             |
| 38.67911572                        | 3.629181208                                 | 0.260805811                               | 8.140567662                       | 4.28701846                              |
| 35.78697394                        | 3.527318186                                 | 0.285445831                               | 7.720784345                       | 3.962769698                             |
| 32.77425773                        | 3.559505469                                 | 0.260686666                               | 8.005330776                       | 4.055815441                             |
| 20.30937501                        | 3.172064786                                 | 0.329010607                               | 7.049410355                       | 3.020376513                             |
| 32.66722899                        | 3.356411981                                 | 0.320497687                               | 7.239732968                       | 3.545964756                             |
| 25.82705526                        | 3.20117415                                  | 0.333886482                               | 7.020449162                       | 3.081586095                             |
| 24.02946301                        | 3.33816516                                  | 0.276332632                               | 7.074121495                       | 3.523595514                             |
| 29.15270903                        | 3.525350444                                 | 0.244148285                               | 8.109679172                       | 4.03049259                              |
| 23.79767027                        | 3.289008564                                 | 0.309396633                               | 7.282222717                       | 3.325120903                             |
| 44.03185226                        | 3.809420429                                 | 0.197850264                               | 8.573276854                       | 5.104481266                             |
| 30.79013346                        | 3.508400682                                 | 0.265438731                               | 7.859064111                       | 3.937543754                             |
| 46.55046385                        | 3.747170987                                 | 0.246758608                               | 8.046941478                       | 4.721867293                             |
| 28.33842807                        | 3.396865526                                 | 0.290458847                               | 7.35334666                        | 3.660890606                             |
| 27.64749208                        | 3.427600269                                 | 0.277594373                               | 7.631858004                       | 3.720096877                             |
| 27.61470338                        | 3.429660277                                 | 0.28392329                                | 7.672546036                       | 3.66948196                              |
| 15.94628602                        | 3.057701439                                 | 0.325143163                               | 6.64856791                        | 2.834186792                             |
| 40.61690508                        | 3.668954331                                 | 0.234160863                               | 7.719018386                       | 4.607682619                             |
| 17.10048483                        | 3.125513204                                 | 0.317329875                               | 6.976524253                       | 2.943709119                             |
| 37.17897814                        | 3.626222085                                 | 0.248918491                               | 8.020773999                       | 4.308614958                             |
| 43.88676829                        | 3.795791512                                 | 0.209300913                               | 8.465702445                       | 4.991722757                             |
| 27.41934082                        | 3.477447247                                 | 0.253372366                               | 7.744314414                       | 3.889391994                             |
| 21.18299062                        | 3.272070791                                 | 0.284609036                               | 7.173178188                       | 3.333558295                             |
| 24.558108                          | 3.382191611                                 | 0.268470244                               | 7.52633501                        | 3.638540674                             |
| 22.43274481                        | 3.267262752                                 | 0.300432997                               | 7.265211987                       | 3.334409243                             |
| 33.35451838                        | 3.591801369                                 | 0.24663142                                | 8.008298257                       | 4.206338073                             |
| 27.89877994                        | 3.375364571                                 | 0.304773257                               | 7.495382875                       | 3.548972853                             |
| 32.45871019                        | 3.513054888                                 | 0.273812116                               | 7.563610668                       | 3.985031556                             |
| 38.36659976                        | 3.672353454                                 | 0.253269687                               | 8.224719005                       | 4.35750781                              |
| 23.41220774                        | 3.23218267                                  | 0.331139692                               | 6.90127341                        | 3.172094574                             |
| 34.26113794                        | 3.525216507                                 | 0.277069266                               | 7.690243548                       | 3.972459361                             |
| 30.18289368                        | 3.493071662                                 | 0.278892162                               | 7.821351041                       | 3.834134867                             |
| 28.45132227                        | 3.456310151                                 | 0.27586362                                | 7.789251226                       | 3.756454802                             |
| 14.32627687                        | 3.019746618                                 | 0.32623205                                | 6.818157794                       | 2.80681018                              |
| 27.35521963                        | 3.328252671                                 | 0.314426431                               | 7.311576715                       | 3.416859828                             |
| 26.61672207                        | 3.300557049                                 | 0.318411593                               | 6.912866481                       | 3.38300239                              |
| 32.73149899                        | 3.515517685                                 | 0.280554491                               | 7.860834525                       | 3.914300453                             |
| 30.67957944                        | 3.491987818                                 | 0.273615413                               | 7.860371021                       | 3.881438149                             |
| 15.63059605                        | 3.016559285                                 | 0.344465168                               | 6.67839665                        | 2.70741543                              |
| 24.46655615                        | 3.3600215                                   | 0.28018447                                | 7.38185886                        | 3.539595036                             |
| 25.02058536                        | 3.262397032                                 | 0.321164326                               | 7.298531181                       | 3.255598175                             |
| 30.30044906                        | 3.452920309                                 | 0.291892774                               | 7.608772899                       | 3.755147443                             |
| 52.21377255                        | 3.880438661                                 | 0.21791853                                | 8.411348128                       | 5.243049109                             |
| 38.6314234                         | 3.705531553                                 | 0.224651473                               | 8.286715795                       | 4.663764816                             |
| 28.17876059                        | 3.39109933                                  | 0.291232791                               | 7.214668345                       | 3.667895206                             |
| 15.67817091                        | 3.070681464                                 | 0.321212624                               | 6.921616143                       | 2.855132875                             |
| 22.55901341                        | 3.242099924                                 | 0.309809968                               | 6.949754943                       | 3.239339898                             |
| 21.98591044                        | 3.286998795                                 | 0.284555021                               | 7.225787923                       | 3.375513425                             |
| 48.49430654                        | 3.800993338                                 | 0.227864696                               | 8.36098009                        | 4.936661351                             |
| 57.78978869                        | 3.905371942                                 | 0.223489162                               | 8.328786924                       | 5.328155681                             |
| 40.78954397                        | 3.6312475                                   | 0.273136301                               | 7.711031229                       | 4.327129142                             |
| 27.48055957                        | 3.349027046                                 | 0.307114793                               | 7.404834234                       | 3.455991594                             |
| 15.22317214                        | 3.071033382                                 | 0.313523038                               | 7.148392547                       | 2.859765332                             |
| 39.56550748                        | 3.660022092                                 | 0.254093997                               | 8.047627997                       | 4.458727761                             |
| 7.860486728                        | 2.570530839                                 | 0.398514641                               | 5.841082027                       | 1.856868316                             |
| 41.39466404                        | 3.699706465                                 | 0.247202438                               | 8.035716098                       | 4.530834408                             |
| 24.52776161                        | 3.32913669                                  | 0.300984679                               | 7.388364499                       | 3.418883505                             |
| 24.94036858                        | 3.307427507                                 | 0.295695177                               | 7.176746718                       | 3.417770697                             |
| 22.46503041                        | 3.205787776                                 | 0.325978829                               | 7.030947951                       | 3.125056686                             |
| 9.662765949                        | 2.732589955                                 | 0.377810272                               | 6.008986257                       | 2.124588677                             |
| 32.19541936                        | 3.593731172                                 | 0.223170301                               | 8.046473433                       | 4.345216597                             |
| 36.06731895                        | 3.630941938                                 | 0.249871144                               | 8.058212308                       | 4.306803197                             |
| 23.837996                          | 3.299648673                                 | 0.302542646                               | 7.443860706                       | 3.348698228                             |
| 34.36848932                        | 3.62041114                                  | 0.239725247                               | 8.055876911                       | 4.316707448                             |
| 37.97852849                        | 3.506909362                                 | 0.300194331                               | 7.643648173                       | 3.927527234                             |
| 23.72038649                        | 3.362602621                                 | 0.280504124                               | 7.619912858                       | 3.537187535                             |
| 36.35553171                        | 3.469776355                                 | 0.298547174                               | 7.292435721                       | 3.928524134                             |
| 16.61121681                        | 3.051994215                                 | 0.33652687                                | 6.690755511                       | 2.815667223                             |
| 16.60744582                        | 3.060310336                                 | 0.347043912                               | 6.793006488                       | 2.745908615                             |



| log.sigma.2.0.mm.3D_glcm_DifferenceVariance | log.sigma.2.0.mm.3D_glcm_ldn | log.sigma.2.0.mm.3D_glcm_ldm | log.sigma.2.0.mm.3D_glcm_Correlation | log.sigma.2.0.mm.3D_glcm_Autocorrelation |
|---------------------------------------------|------------------------------|------------------------------|--------------------------------------|------------------------------------------|
| 29.73746042                                 | 0.893875938                  | 0.211766866                  | 0.166366661                          | 699.5246488                              |
| 9.01302599                                  | 0.923118188                  | 0.361281118                  | 0.254223791                          | 293.2082915                              |
| 8.425180705                                 | 0.919379673                  | 0.357684084                  | 0.304314117                          | 226.8121516                              |
| 21.10804039                                 | 0.897416475                  | 0.273228411                  | 0.193146867                          | 444.218491                               |
| 14.05837909                                 | 0.903918484                  | 0.271075404                  | 0.167803553                          | 376.9735858                              |
| 16.04555688                                 | 0.902470942                  | 0.230503937                  | 0.267875133                          | 431.4874694                              |
| 11.38625484                                 | 0.927900071                  | 0.301457085                  | 0.252834908                          | 473.5132068                              |
| 12.94992684                                 | 0.924227362                  | 0.326213976                  | 0.221976785                          | 433.3183333                              |
| 16.26294007                                 | 0.912403226                  | 0.266827357                  | 0.176855434                          | 479.913856                               |
| 13.35647221                                 | 0.903261407                  | 0.269529232                  | 0.201024586                          | 372.3372134                              |
| 8.730116044                                 | 0.905600421                  | 0.296068288                  | 0.208061887                          | 249.9735664                              |
| 20.79021635                                 | 0.910177598                  | 0.266323518                  | 0.190858947                          | 534.6590175                              |
| 11.34762861                                 | 0.935483651                  | 0.411273296                  | 0.238531109                          | 410.5416806                              |
| 21.40275643                                 | 0.918338607                  | 0.267997672                  | 0.209001328                          | 770.2548135                              |
| 26.02407389                                 | 0.905930322                  | 0.255307989                  | 0.122325655                          | 473.0643287                              |
| 14.18528825                                 | 0.92424802                   | 0.330138746                  | 0.233684258                          | 503.0288576                              |
| 13.35973306                                 | 0.888440818                  | 0.232957499                  | 0.169224969                          | 315.9242987                              |
| 8.628980629                                 | 0.925198592                  | 0.375653631                  | 0.287946296                          | 321.1433604                              |
| 7.054667834                                 | 0.924984202                  | 0.309890044                  | 0.170697917                          | 310.8691479                              |
| 14.64629613                                 | 0.91613221                   | 0.270211058                  | 0.248832827                          | 475.2643104                              |
| 7.257710242                                 | 0.9304657                    | 0.395372841                  | 0.293584808                          | 312.8044345                              |
| 8.064825296                                 | 0.902274196                  | 0.277716023                  | 0.200065457                          | 288.3700783                              |
| 13.27748168                                 | 0.914868923                  | 0.298413262                  | 0.160815478                          | 509.4287                                 |
| 10.4428802                                  | 0.907418066                  | 0.294561664                  | 0.218401929                          | 329.0246445                              |
| 16.66771044                                 | 0.924878193                  | 0.306714083                  | 0.219792618                          | 590.4003278                              |
| 18.01231365                                 | 0.90498569                   | 0.234589627                  | 0.259630402                          | 410.5280638                              |
| 19.23926127                                 | 0.90312539                   | 0.253426086                  | 0.198617563                          | 435.276266                               |
| 15.24530869                                 | 0.912419465                  | 0.285402127                  | 0.173202702                          | 459.3482212                              |
| 8.205622152                                 | 0.887315531                  | 0.245834699                  | 0.174761099                          | 251.9410122                              |
| 10.20669712                                 | 0.91869636                   | 0.310303431                  | 0.161282524                          | 425.7881432                              |
| 15.51815709                                 | 0.934060931                  | 0.320934241                  | 0.228539195                          | 573.11506                                |
| 13.99018203                                 | 0.908010425                  | 0.332860318                  | 0.121984633                          | 362.7769615                              |
| 19.95239516                                 | 0.914896636                  | 0.269515042                  | 0.233528157                          | 416.5652812                              |
| 19.86482357                                 | 0.91040684                   | 0.301348126                  | 0.207387266                          | 510.846384                               |
| 16.12203409                                 | 0.918145835                  | 0.26339558                   | 0.221928788                          | 451.4829891                              |
| 11.07166123                                 | 0.928449401                  | 0.341731777                  | 0.242543876                          | 389.6201954                              |
| 19.92485625                                 | 0.939281088                  | 0.331952028                  | 0.113295682                          | 789.1798339                              |
| 16.15272522                                 | 0.945674948                  | 0.391593392                  | 0.247296082                          | 695.0279813                              |
| 11.48422711                                 | 0.900043728                  | 0.271428132                  | 0.009956638                          | 413.8430492                              |
| 12.72571138                                 | 0.901218162                  | 0.241414942                  | 0.21785093                           | 307.0536176                              |
| 12.53796868                                 | 0.911510701                  | 0.318127717                  | 0.216423028                          | 298.8811995                              |
| 17.60748686                                 | 0.886931424                  | 0.188842293                  | 0.175535526                          | 303.6998928                              |
| 15.00740666                                 | 0.908951357                  | 0.264450267                  | 0.204554555                          | 437.2007384                              |
| 23.98355117                                 | 0.907593493                  | 0.244211636                  | 0.127075795                          | 548.5192463                              |
| 14.74697001                                 | 0.913055887                  | 0.288910346                  | 0.209648681                          | 456.2428548                              |
| 13.65184084                                 | 0.91718012                   | 0.273508792                  | 0.193351729                          | 329.6725177                              |
| 14.00906956                                 | 0.91844855                   | 0.286747322                  | 0.217659037                          | 431.5710441                              |
| 7.813225487                                 | 0.919577495                  | 0.328797314                  | 0.204828563                          | 286.5941296                              |
| 18.96856804                                 | 0.887938737                  | 0.224525824                  | 0.136368281                          | 324.1432856                              |
| 8.296823686                                 | 0.919239222                  | 0.331007516                  | 0.334850263                          | 301.3422837                              |
| 18.41918358                                 | 0.91202546                   | 0.244738012                  | 0.227795135                          | 597.5891736                              |
| 18.61288972                                 | 0.900744535                  | 0.200936226                  | 0.185478707                          | 431.3660115                              |
| 12.14682508                                 | 0.90426428                   | 0.248341538                  | 0.140354601                          | 348.4702797                              |
| 9.941989238                                 | 0.909750639                  | 0.289060812                  | 0.22966081                           | 274.5853812                              |
| 11.15753836                                 | 0.90979976                   | 0.267769078                  | 0.238856029                          | 446.8044594                              |
| 11.1808789                                  | 0.910345628                  | 0.291359911                  | 0.211422583                          | 349.6071532                              |
| 15.4333252                                  | 0.898357222                  | 0.244683081                  | 0.165269981                          | 437.2012673                              |
| 15.14219092                                 | 0.921534361                  | 0.304947337                  | 0.19891628                           | 489.0551522                              |
| 16.3910831                                  | 0.912512784                  | 0.26763515                   | 0.1239014                            | 454.1662271                              |
| 19.15491324                                 | 0.905632085                  | 0.2660528                    | 0.157386286                          | 449.4638927                              |
| 13.24325481                                 | 0.924071321                  | 0.347565133                  | 0.19377391                           | 348.5273439                              |
| 18.30655484                                 | 0.918791372                  | 0.278702436                  | 0.150060629                          | 729.7005268                              |
| 15.32218219                                 | 0.913494102                  | 0.285855834                  | 0.237752256                          | 533.5815892                              |
| 14.14959643                                 | 0.916571839                  | 0.275854057                  | 0.219293745                          | 497.9396569                              |
| 6.319549742                                 | 0.902567858                  | 0.319329725                  | 0.263845044                          | 143.8571989                              |
| 15.52277522                                 | 0.922853394                  | 0.324272237                  | 0.16093613                           | 449.5829969                              |
| 15.01983519                                 | 0.91972271                   | 0.324634184                  | 0.053887029                          | 481.683006                               |
| 17.23297925                                 | 0.922915003                  | 0.284957727                  | 0.190937509                          | 545.7627947                              |
| 15.40986884                                 | 0.922946289                  | 0.269203042                  | 0.213116261                          | 528.256902                               |
| 8.225286281                                 | 0.925452573                  | 0.34717937                   | 0.162114287                          | 424.5409523                              |
| 11.66836236                                 | 0.905449731                  | 0.287117539                  | 0.188369267                          | 345.9403697                              |
| 14.2925744                                  | 0.936234499                  | 0.328746998                  | 0.254835583                          | 681.3809262                              |
| 15.99160038                                 | 0.915533519                  | 0.297396668                  | 0.193669787                          | 389.2793315                              |
| 24.34329129                                 | 0.88665422                   | 0.217118659                  | 0.138062315                          | 439.7529181                              |
| 16.51680834                                 | 0.890979355                  | 0.215454966                  | 0.150463177                          | 303.5275413                              |
| 14.40439246                                 | 0.905979989                  | 0.28316397                   | 0.150607688                          | 376.2882959                              |
| 7.440482163                                 | 0.928925603                  | 0.317684992                  | 0.226804372                          | 323.0640508                              |
| 11.87116193                                 | 0.915619868                  | 0.317803822                  | 0.19039429                           | 348.7093215                              |
| 10.48004418                                 | 0.91573722                   | 0.283709251                  | 0.170566018                          | 461.9358608                              |
| 23.68873702                                 | 0.907035596                  | 0.224339706                  | 0.184458789                          | 532.9603748                              |
| 28.96785762                                 | 0.897479047                  | 0.220277665                  | 0.18281477                           | 702.3490407                              |
| 21.77075106                                 | 0.90075442                   | 0.276158789                  | 0.066022035                          | 355.4075983                              |
| 15.3083781                                  | 0.921996018                  | 0.328070809                  | 0.174861105                          | 470.3165861                              |
| 6.902595824                                 | 0.904593302                  | 0.315882641                  | 0.255949809                          | 243.0700093                              |
| 19.30674382                                 | 0.901436733                  | 0.248072663                  | 0.151269859                          | 379.126604                               |
| 4.3549722                                   | 0.937930008                  | 0.455658838                  | 0.334224983                          | 300.8192027                              |
| 20.48110504                                 | 0.902590004                  | 0.260260651                  | 0.142842953                          | 357.8914805                              |
| 12.72694823                                 | 0.913679968                  | 0.303259921                  | 0.226958202                          | 410.8840362                              |
| 13.09176969                                 | 0.9160025                    | 0.301581138                  | 0.176976936                          | 429.5000713                              |
| 12.53417065                                 | 0.924813084                  | 0.338923738                  | 0.206425547                          | 509.1725474                              |
| 5.09838718                                  | 0.93801822                   | 0.419460492                  | 0.370887837                          | 353.0305833                              |
| 13.14176504                                 | 0.896543139                  | 0.214945144                  | 0.189119884                          | 378.5510976                              |
| 17.32174808                                 | 0.908003105                  | 0.246228947                  | 0.158692993                          | 366.6155059                              |
| 12.42994621                                 | 0.905662318                  | 0.310613916                  | 0.251145211                          | 325.5914374                              |
| 15.50629377                                 | 0.90290214                   | 0.234154679                  | 0.125690904                          | 404.6286614                              |
| 22.29949705                                 | 0.922658565                  | 0.315725433                  | 0.223628138                          | 663.7060462                              |
| 11.05787302                                 | 0.907609169                  | 0.280477371                  | 0.235214414                          | 269.5225963                              |
| 20.67513201                                 | 0.920550061                  | 0.297722137                  | 0.129135694                          | 665.451845                               |
| 8.534949145                                 | 0.900781526                  | 0.34389553                   | 0.185415897                          | 227.2985073                              |
| 8.980749811                                 | 0.932422907                  | 0.36429403                   | 0.258159334                          | 392.5423593                              |

| log.sigma.2.0.mm.3D_glc_m_SumEntropy | log.sigma.2.0.mm.3D_glc_m_AverageIntensity | log.sigma.2.0.mm.3D_glc_m_Energy | log.sigma.2.0.mm.3D_glc_m_SumSquares | log.sigma.2.0.mm.3D_glc_m_ClusterProminence |
|--------------------------------------|--------------------------------------------|----------------------------------|--------------------------------------|---------------------------------------------|
| 5.059696854                          | 26.71974483                                | 0.005162555                      | 34.74193725                          | 31927.9195                                  |
| 4.201190454                          | 17.08860517                                | 0.021483165                      | 11.52185065                          | 4484.59497                                  |
| 4.345062353                          | 14.96525733                                | 0.018378484                      | 12.06223359                          | 4398.614785                                 |
| 4.834560906                          | 21.2172964                                 | 0.008620827                      | 23.54145024                          | 14851.17262                                 |
| 4.565981757                          | 19.60800414                                | 0.010597759                      | 16.59186613                          | 8348.783913                                 |
| 4.841820884                          | 20.87019816                                | 0.007585116                      | 23.10064359                          | 16975.97883                                 |
| 4.590047259                          | 21.77469329                                | 0.010777837                      | 14.90292743                          | 7301.191398                                 |
| 4.510015747                          | 20.90127087                                | 0.014749043                      | 14.28483888                          | 7539.98432                                  |
| 4.752156833                          | 22.01586367                                | 0.007106532                      | 18.66802209                          | 9829.006129                                 |
| 4.588611323                          | 19.39421462                                | 0.009950793                      | 16.98304259                          | 8253.779676                                 |
| 4.379108936                          | 15.7503281                                 | 0.010962594                      | 12.16192305                          | 3703.763586                                 |
| 4.817442141                          | 23.20857717                                | 0.007976641                      | 22.14339519                          | 16393.76099                                 |
| 4.098623593                          | 20.32699081                                | 0.033086919                      | 11.11649728                          | 7205.249513                                 |
| 4.766463899                          | 27.91477937                                | 0.009007653                      | 23.78067247                          | 27423.67512                                 |
| 4.844524333                          | 21.91936639                                | 0.007737465                      | 25.70172255                          | 19765.56297                                 |
| 4.552819933                          | 22.47414341                                | 0.014637929                      | 15.64241752                          | 9064.028765                                 |
| 4.688389648                          | 17.86898821                                | 0.006296993                      | 18.97612152                          | 6422.396683                                 |
| 4.226145814                          | 17.88709631                                | 0.023096847                      | 11.49767273                          | 4329.563315                                 |
| 4.193683767                          | 17.69457041                                | 0.013126284                      | 9.569208236                          | 2336.524466                                 |
| 4.76820378                           | 21.86066274                                | 0.008574297                      | 18.52291604                          | 11188.47613                                 |
| 4.16024479                           | 17.6662655                                 | 0.023933646                      | 9.737648168                          | 3470.455587                                 |
| 4.381567088                          | 16.94624066                                | 0.010315183                      | 12.02787016                          | 3097.638219                                 |
| 4.468652725                          | 22.67974481                                | 0.011720352                      | 14.04048152                          | 6603.855285                                 |
| 4.519366432                          | 18.18101445                                | 0.009460028                      | 14.27120996                          | 4796.106641                                 |
| 4.592873804                          | 24.36337394                                | 0.012973691                      | 18.09273595                          | 12758.46208                                 |
| 4.967651561                          | 20.34338506                                | 0.005561011                      | 24.83899429                          | 19419.41464                                 |
| 4.873902644                          | 20.99756585                                | 0.0069197                        | 22.85508835                          | 14321.08075                                 |
| 4.581065316                          | 21.55035734                                | 0.010221694                      | 16.27882519                          | 9663.00788                                  |
| 4.389195042                          | 15.82054664                                | 0.009439277                      | 12.91756917                          | 3137.080262                                 |
| 4.311293011                          | 20.78747882                                | 0.01386693                       | 11.23104982                          | 4786.856082                                 |
| 4.582046426                          | 24.02440116                                | 0.013941168                      | 17.23161012                          | 11680.14274                                 |
| 4.310123809                          | 19.11306956                                | 0.016245969                      | 14.27744715                          | 6179.782652                                 |
| 4.940742324                          | 20.4986226                                 | 0.006891584                      | 23.91736951                          | 15036.55611                                 |
| 4.753872404                          | 22.67190575                                | 0.010507802                      | 21.08255371                          | 15880.99745                                 |
| 4.820590502                          | 21.32879277                                | 0.007219876                      | 20.02317715                          | 11303.34539                                 |
| 4.35924659                           | 19.80678657                                | 0.017105927                      | 12.73924881                          | 6450.990906                                 |
| 4.430029794                          | 28.270496                                  | 0.016266232                      | 17.20459908                          | 13022.99297                                 |
| 4.404837544                          | 26.49452832                                | 0.025621417                      | 16.30064733                          | 12318.05435                                 |
| 4.194035166                          | 20.53508175                                | 0.010988947                      | 11.86131269                          | 3718.371717                                 |
| 4.77088184                           | 17.62776949                                | 0.005511805                      | 18.67683814                          | 7079.80649                                  |
| 4.444840456                          | 17.32423117                                | 0.013800426                      | 15.39366258                          | 7498.522533                                 |
| 4.991856186                          | 17.65901311                                | 0.003642962                      | 26.18189694                          | 12615.51569                                 |
| 4.726944848                          | 21.028047                                  | 0.007783026                      | 17.97542561                          | 9797.467558                                 |
| 4.841546966                          | 23.59149042                                | 0.007169856                      | 24.95024664                          | 17607.5942                                  |
| 4.59778785                           | 21.47162653                                | 0.010643932                      | 16.28537145                          | 9064.120419                                 |
| 4.583274809                          | 18.30137916                                | 0.009780935                      | 16.52571504                          | 8258.680554                                 |
| 4.642515015                          | 20.86198947                                | 0.009938779                      | 16.49419575                          | 9524.194551                                 |
| 4.185435505                          | 16.89195157                                | 0.016417812                      | 10.20716948                          | 3206.585921                                 |
| 4.743769508                          | 18.18615494                                | 0.00748238                       | 23.17283912                          | 12150.46202                                 |
| 4.423623105                          | 17.3285185                                 | 0.015681877                      | 13.55556495                          | 4912.468371                                 |
| 4.886464114                          | 24.50445064                                | 0.006604047                      | 23.10992587                          | 16987.10349                                 |
| 4.992796552                          | 20.91956657                                | 0.004323628                      | 25.67503542                          | 14793.20797                                 |
| 4.559404087                          | 18.84096334                                | 0.008035697                      | 15.50110305                          | 5869.910643                                 |
| 4.468875874                          | 16.56419888                                | 0.010657047                      | 14.23868943                          | 5032.870242                                 |
| 4.611244563                          | 21.23591418                                | 0.008617919                      | 15.20972828                          | 6567.672626                                 |
| 4.456808656                          | 18.76376181                                | 0.011279983                      | 14.20708395                          | 6472.692232                                 |
| 4.744802083                          | 21.06672146                                | 0.006560982                      | 18.86551178                          | 8912.974567                                 |
| 4.551324765                          | 22.18695571                                | 0.01177663                       | 16.25590643                          | 9766.978103                                 |
| 4.595258963                          | 21.44295099                                | 0.00902914                       | 17.05037224                          | 9141.331865                                 |
| 4.836969129                          | 21.33024179                                | 0.006620069                      | 21.43107981                          | 11813.75434                                 |
| 4.332291785                          | 18.80895351                                | 0.020398836                      | 13.7930702                           | 7450.344334                                 |
| 4.661700763                          | 27.12947436                                | 0.009597936                      | 19.3841897                           | 11820.29287                                 |
| 4.748027611                          | 23.15205939                                | 0.009589172                      | 18.55215363                          | 10833.7117                                  |
| 4.691037862                          | 22.38052558                                | 0.00846139                       | 17.16810073                          | 10055.4134                                  |
| 4.251133716                          | 11.88255189                                | 0.013987937                      | 9.808172068                          | 2450.93279                                  |
| 4.474322816                          | 21.31280037                                | 0.014244252                      | 15.01516602                          | 9098.23035                                  |
| 4.240301007                          | 22.10526814                                | 0.016667219                      | 12.76815444                          | 6890.176764                                 |
| 4.719164646                          | 23.45622021                                | 0.009341923                      | 19.45134874                          | 11522.30253                                 |
| 4.731035584                          | 23.06245745                                | 0.007875246                      | 18.4449399                           | 10881.12533                                 |
| 4.084334846                          | 20.74631816                                | 0.019679051                      | 8.969221703                          | 3039.821213                                 |
| 4.487898542                          | 18.71216509                                | 0.010814415                      | 15.1716293                           | 6017.619663                                 |
| 4.557922489                          | 26.14731679                                | 0.014262821                      | 16.27701653                          | 10405.78422                                 |
| 4.619221773                          | 19.85665077                                | 0.010247461                      | 17.88949327                          | 11709.43747                                 |
| 5.002988641                          | 21.18198279                                | 0.00491129                       | 28.27814841                          | 16783.40692                                 |
| 4.842254472                          | 17.63098371                                | 0.004936597                      | 22.56066645                          | 10239.85598                                 |
| 4.389521531                          | 19.55626581                                | 0.012672113                      | 16.01522868                          | 10106.99112                                 |
| 4.235536613                          | 18.07241836                                | 0.014836871                      | 10.00713765                          | 3393.499911                                 |
| 4.35655099                           | 18.75503021                                | 0.015114826                      | 13.76789506                          | 6514.572793                                 |
| 4.410597774                          | 21.60799124                                | 0.01070661                       | 12.26191681                          | 5035.82938                                  |
| 4.987024796                          | 23.21366324                                | 0.004945493                      | 28.80650941                          | 19283.52003                                 |
| 5.036570363                          | 26.74927978                                | 0.005610835                      | 33.69822528                          | 31256.22851                                 |
| 4.633250425                          | 19.12403753                                | 0.009795018                      | 20.72871652                          | 10709.6899                                  |
| 4.527654499                          | 21.78734249                                | 0.013347271                      | 15.70364892                          | 8501.193385                                 |
| 4.334348191                          | 15.50612867                                | 0.011424215                      | 10.23308923                          | 2479.633956                                 |
| 4.825211279                          | 19.67003881                                | 0.006716265                      | 21.84250916                          | 11915.52379                                 |
| 3.847486531                          | 17.28774247                                | 0.037681452                      | 5.922135087                          | 1501.672475                                 |
| 4.805254297                          | 19.1202436                                 | 0.007380055                      | 22.96473607                          | 12846.36901                                 |
| 4.519874196                          | 20.41438894                                | 0.012463219                      | 15.08652165                          | 7719.949424                                 |
| 4.451443726                          | 20.85509253                                | 0.011874332                      | 13.94356659                          | 7718.43773                                  |
| 4.400214372                          | 22.64498353                                | 0.015644434                      | 12.96534763                          | 7426.062979                                 |
| 3.924563823                          | 18.7525143                                 | 0.035753896                      | 7.956347003                          | 2309.36895                                  |
| 4.762371021                          | 19.66901262                                | 0.005478203                      | 18.99782371                          | 8521.814449                                 |
| 4.778886866                          | 19.30911799                                | 0.006689028                      | 20.20580982                          | 10691.40599                                 |
| 4.561989686                          | 18.01669181                                | 0.011564614                      | 16.22863589                          | 8168.68337                                  |
| 4.723786396                          | 20.33399303                                | 0.005939038                      | 18.3966485                           | 7296.112926                                 |
| 4.77995176                           | 25.86806533                                | 0.01278387                       | 23.38724617                          | 20739.91542                                 |
| 4.601639777                          | 16.39219535                                | 0.008888855                      | 15.77781625                          | 5952.076516                                 |
| 4.550983638                          | 25.90385865                                | 0.012358602                      | 19.84221199                          | 12270.91302                                 |
| 4.168192741                          | 15.01332375                                | 0.016427554                      | 10.20262993                          | 3133.212018                                 |
| 4.223720006                          | 19.90188187                                | 0.022321713                      | 10.59354592                          | 4478.612656                                 |

| log.sigma.2.0.mm.3D_glc_m_SumAverage | log.sigma.2.0.mm.3D_glc_m_lmc2 | log.sigma.2.0.mm.3D_glc_m_lmc1 | log.sigma.2.0.mm.3D_glc_m_DifferenceAverage | log.sigma.2.0.mm.3D_glc_m_Id |
|--------------------------------------|--------------------------------|--------------------------------|---------------------------------------------|------------------------------|
| 52.67820047                          | 0.759112957                    | -0.097227559                   | 5.533255319                                 | 0.29647428                   |
| 34.07530304                          | 0.774390097                    | -0.132032719                   | 2.733518215                                 | 0.432269432                  |
| 29.8775558                           | 0.744355046                    | -0.115037676                   | 2.777444199                                 | 0.429526302                  |
| 41.93103456                          | 0.833508077                    | -0.142274229                   | 4.360337682                                 | 0.35191472                   |
| 38.68779309                          | 0.660515873                    | -0.073042305                   | 3.843378776                                 | 0.353871073                  |
| 41.22405108                          | 0.874361952                    | -0.172932439                   | 4.455173341                                 | 0.317806064                  |
| 43.34001578                          | 0.604343595                    | -0.060051479                   | 3.418126702                                 | 0.381199016                  |
| 41.46832941                          | 0.620223307                    | -0.065443974                   | 3.313474731                                 | 0.400696126                  |
| 43.65455087                          | 0.603113932                    | -0.056442108                   | 4.08149204                                  | 0.34891237                   |
| 38.4132142                           | 0.75647125                     | -0.109372001                   | 3.755512052                                 | 0.353504862                  |
| 31.45930161                          | 0.655632965                    | -0.07623796                    | 3.168812462                                 | 0.379132407                  |
| 46.05006978                          | 0.716653527                    | -0.088525328                   | 4.260236634                                 | 0.347994929                  |
| 40.38632793                          | 0.751514672                    | -0.123231001                   | 2.601749735                                 | 0.472297271                  |
| 55.32362936                          | 0.787287441                    | -0.118154781                   | 4.207985967                                 | 0.350115136                  |
| 43.35088575                          | 0.756801078                    | -0.102029207                   | 4.749645785                                 | 0.336083831                  |
| 44.68498481                          | 0.665638022                    | -0.077537991                   | 3.333900403                                 | 0.403495583                  |
| 35.37322629                          | 0.714541365                    | -0.08738071                    | 4.11755223                                  | 0.322812157                  |
| 35.65383976                          | 0.743200581                    | -0.119954992                   | 2.654892883                                 | 0.443367921                  |
| 35.17048798                          | 0.634631106                    | -0.072659448                   | 2.93243782                                  | 0.39203903                   |
| 43.37536109                          | 0.62001708                     | -0.061859393                   | 3.873976971                                 | 0.353262832                  |
| 35.21155774                          | 0.671087978                    | -0.090087525                   | 2.437408238                                 | 0.46095194                   |
| 33.8226847                           | 0.653536902                    | -0.074673333                   | 3.267312941                                 | 0.364256734                  |
| 45.03254823                          | 0.768741782                    | -0.116776803                   | 3.467137868                                 | 0.37832577                   |
| 36.1106644                           | 0.637284822                    | -0.068427957                   | 3.336799669                                 | 0.37669805                   |
| 48.42770839                          | 0.796628509                    | -0.131232224                   | 3.569468137                                 | 0.384236788                  |
| 40.1777632                           | 0.745596323                    | -0.095776224                   | 4.464004577                                 | 0.321976467                  |
| 41.50097643                          | 0.686561555                    | -0.076112564                   | 4.3748841                                   | 0.336385656                  |
| 42.72554696                          | 0.656000937                    | -0.072470614                   | 3.695909935                                 | 0.366468354                  |
| 31.60253234                          | 0.788507621                    | -0.127952402                   | 3.55799121                                  | 0.338050088                  |
| 41.17830673                          | 0.632467475                    | -0.070064736                   | 3.168450466                                 | 0.389905128                  |
| 47.71009316                          | 0.664770339                    | -0.078097882                   | 3.453489139                                 | 0.396253745                  |
| 38.00635306                          | 0.670577961                    | -0.081527384                   | 3.299662814                                 | 0.405732316                  |
| 40.53591497                          | 0.717168631                    | -0.086826121                   | 4.28701846                                  | 0.349982871                  |
| 44.99872272                          | 0.744330539                    | -0.099552613                   | 3.962769698                                 | 0.377246673                  |
| 42.27413233                          | 0.647758023                    | -0.067405873                   | 4.055815441                                 | 0.346899282                  |
| 39.31300279                          | 0.687403824                    | -0.08835973                    | 3.020376513                                 | 0.415007213                  |
| 56.1125794                           | 0.712358649                    | -0.093115458                   | 3.545964576                                 | 0.404127516                  |
| 52.56915583                          | 0.746515561                    | -0.111927346                   | 3.081586095                                 | 0.454144639                  |
| 40.68459236                          | 0.623625245                    | -0.067374578                   | 3.523595514                                 | 0.357850026                  |
| 34.81725383                          | 0.506317265                    | -0.038017962                   | 4.03049259                                  | 0.330136227                  |
| 34.38886847                          | 0.678231129                    | -0.082282738                   | 3.325120903                                 | 0.394558648                  |
| 34.59787958                          | 0.57251015                     | -0.046151763                   | 5.104481266                                 | 0.280304992                  |
| 41.63547056                          | 0.635817356                    | -0.064803651                   | 3.937543754                                 | 0.348684418                  |
| 46.7015186                           | 0.70265772                     | -0.081450735                   | 4.721867293                                 | 0.327579514                  |
| 42.54842565                          | 0.756564006                    | -0.109561295                   | 3.660890606                                 | 0.369440606                  |
| 36.13108097                          | 0.6801797                      | -0.079239049                   | 3.720096877                                 | 0.357365215                  |
| 41.36373654                          | 0.632715343                    | -0.065915541                   | 3.66948196                                  | 0.367812758                  |
| 33.73623768                          | 0.70382096                     | -0.099021851                   | 2.834186792                                 | 0.406998487                  |
| 35.84132429                          | 0.821361122                    | -0.136527448                   | 4.607682619                                 | 0.312904885                  |
| 34.45531105                          | 0.739758125                    | -0.11325293                    | 2.943709119                                 | 0.407424679                  |
| 48.66556026                          | 0.702350728                    | -0.082376914                   | 4.308614958                                 | 0.330851208                  |
| 41.3034524                           | 0.632052572                    | -0.059588022                   | 4.991722757                                 | 0.290662076                  |
| 37.21731332                          | 0.528249431                    | -0.042422175                   | 3.889391994                                 | 0.336592721                  |
| 32.94774688                          | 0.737801924                    | -0.103195137                   | 3.333558295                                 | 0.372963811                  |
| 42.0901385                           | 0.735134245                    | -0.098971773                   | 3.638540674                                 | 0.353571219                  |
| 37.23670224                          | 0.654996293                    | -0.07590405                    | 3.334409243                                 | 0.374056574                  |
| 41.66451322                          | 0.587648722                    | -0.052168358                   | 4.206338073                                 | 0.331225071                  |
| 44.07444231                          | 0.656154273                    | -0.073274573                   | 3.548972853                                 | 0.382538377                  |
| 42.51871525                          | 0.710708195                    | -0.088433088                   | 3.985031556                                 | 0.350427603                  |
| 42.23574364                          | 0.585317551                    | -0.050824851                   | 4.35750781                                  | 0.346327654                  |
| 37.18704173                          | 0.755886924                    | -0.115678499                   | 3.172094574                                 | 0.417741704                  |
| 53.91768778                          | 0.674325459                    | -0.076823003                   | 3.972459361                                 | 0.359525044                  |
| 45.99497995                          | 0.623428618                    | -0.06307099                    | 3.834134867                                 | 0.365588702                  |
| 44.44821854                          | 0.57990064                     | -0.054405262                   | 3.756454802                                 | 0.358789874                  |
| 23.76510378                          | 0.722516623                    | -0.106014524                   | 2.80681018                                  | 0.39915824                   |
| 42.28753251                          | 0.652762907                    | -0.073794062                   | 3.416859828                                 | 0.398713938                  |
| 43.86302723                          | 0.727228852                    | -0.102250232                   | 3.38300239                                  | 0.398902695                  |
| 46.55932994                          | 0.613019471                    | -0.060062521                   | 3.914300453                                 | 0.364641837                  |
| 45.78774632                          | 0.59299457                     | -0.055616488                   | 3.881438149                                 | 0.352762511                  |
| 41.1361093                           | 0.590620796                    | -0.064065222                   | 2.70741543                                  | 0.421800301                  |
| 37.05193772                          | 0.716310899                    | -0.093924267                   | 3.539595036                                 | 0.369436193                  |
| 52.04315914                          | 0.682621597                    | -0.084761635                   | 3.255598175                                 | 0.40355707                   |
| 39.27704997                          | 0.731522902                    | -0.096039407                   | 3.755147443                                 | 0.374928692                  |
| 41.74909444                          | 0.700214783                    | -0.077021972                   | 5.243049109                                 | 0.302010135                  |
| 34.65219604                          | 0.611016399                    | -0.056626079                   | 4.663764816                                 | 0.304364427                  |
| 38.67588361                          | 0.724053117                    | -0.098473987                   | 3.667895206                                 | 0.364817661                  |
| 35.81892651                          | 0.610485137                    | -0.067359511                   | 2.855132875                                 | 0.398362575                  |
| 37.2111783                           | 0.758364983                    | -0.11672135                    | 3.239339898                                 | 0.395329637                  |
| 42.88276378                          | 0.662926049                    | -0.076753091                   | 3.375513425                                 | 0.368327284                  |
| 45.93889888                          | 0.737874631                    | -0.091048479                   | 4.936661351                                 | 0.310496512                  |
| 52.76996277                          | 0.781986071                    | -0.107815809                   | 5.328155681                                 | 0.304678509                  |
| 37.63813933                          | 0.751203542                    | -0.10149888                    | 4.327129142                                 | 0.354396496                  |
| 43.24346686                          | 0.705070504                    | -0.09019206                    | 3.455991594                                 | 0.401613229                  |
| 31.01225735                          | 0.547820949                    | -0.052018266                   | 2.859765332                                 | 0.397291841                  |
| 38.76781143                          | 0.694798596                    | -0.080168591                   | 4.458727761                                 | 0.331563184                  |
| 34.57372596                          | 0.690593459                    | -0.11056324                    | 1.856868316                                 | 0.512646678                  |
| 37.66096496                          | 0.703567619                    | -0.08191562                    | 4.530834408                                 | 0.341041123                  |
| 40.36272274                          | 0.684025485                    | -0.083638064                   | 3.418883505                                 | 0.382341693                  |
| 41.3205058                           | 0.715335546                    | -0.095213862                   | 3.417770697                                 | 0.381896357                  |
| 45.00310917                          | 0.704766937                    | -0.095376396                   | 3.125056686                                 | 0.412126929                  |
| 37.42043291                          | 0.715377624                    | -0.118184776                   | 2.124588677                                 | 0.482247075                  |
| 38.72425704                          | 0.632291014                    | -0.062067817                   | 4.345216597                                 | 0.306843772                  |
| 38.12451573                          | 0.573516531                    | -0.049134195                   | 4.306803197                                 | 0.3316277                    |
| 35.86365861                          | 0.651384457                    | -0.074713328                   | 3.348698228                                 | 0.388962479                  |
| 40.11417287                          | 0.557050303                    | -0.045730945                   | 4.316707448                                 | 0.321993253                  |
| 51.31251242                          | 0.744083429                    | -0.102524797                   | 3.927527234                                 | 0.388484468                  |
| 32.61221766                          | 0.609253406                    | -0.060406495                   | 3.537187535                                 | 0.363879006                  |
| 51.49195872                          | 0.819423031                    | -0.14229044                    | 3.928524134                                 | 0.374487751                  |
| 30.02664751                          | 0.699976568                    | -0.09757451                    | 2.815667223                                 | 0.418254472                  |
| 39.47955264                          | 0.612828036                    | -0.068554171                   | 2.745908615                                 | 0.434056816                  |

| log.sigma.2.0.mm.3D_glcm_ClusterTendency | log.sigma.2.0.mm.3D_firstorder_InterquartileRange | log.sigma.2.0.mm.3D_firstorder_Skewness | log.sigma.2.0.mm.3D_firstorder_Uniformity |
|------------------------------------------|---------------------------------------------------|-----------------------------------------|-------------------------------------------|
| 83.89035526                              | 136.3279023                                       | -1.022779771                            | 0.06263186                                |
| 28.1807912                               | 69.5623343                                        | -0.360425562                            | 0.12292602                                |
| 30.84872467                              | 80.51277468                                       | -0.059670527                            | 0.104757186                               |
| 59.11064268                              | 128.4657745                                       | -1.024858752                            | 0.074791861                               |
| 40.15139448                              | 101.0285287                                       | -0.858611421                            | 0.087806808                               |
| 62.81796421                              | 112.128674                                        | -0.020077225                            | 0.073494031                               |
| 38.87865909                              | 97.71685982                                       | -0.112901903                            | 0.087558039                               |
| 37.64209583                              | 81.42282736                                       | -0.59714989                             | 0.102265383                               |
| 47.08003489                              | 115.5366855                                       | -0.729287458                            | 0.07586215                                |
| 41.37065225                              | 105.1066973                                       | -0.879322847                            | 0.081861564                               |
| 29.0690028                               | 94.70581484                                       | -0.564209618                            | 0.09213461                                |
| 57.12867376                              | 106.123323                                        | -1.164466853                            | 0.078357433                               |
| 29.32891813                              | 51.3083262                                        | -0.791635397                            | 0.155191986                               |
| 59.7143377                               | 104.433795                                        | -1.006060322                            | 0.078954536                               |
| 61.88450616                              | 107.9488824                                       | -1.002567222                            | 0.075808078                               |
| 40.79671083                              | 80.17145371                                       | -0.655310084                            | 0.100092452                               |
| 42.98758034                              | 126.8752704                                       | -0.374485691                            | 0.07144741                                |
| 29.05933597                              | 62.24699926                                       | -0.409938273                            | 0.130636346                               |
| 22.24005818                              | 85.05400777                                       | -0.140358714                            | 0.104058395                               |
| 49.43825401                              | 101.5283146                                       | -0.528260202                            | 0.080957799                               |
| 24.60142703                              | 62.56522149                                       | -0.11669022                             | 0.127991938                               |
| 28.28900508                              | 95.2129941                                        | -0.588217033                            | 0.093067501                               |
| 35.19943623                              | 92.37878156                                       | -0.823948187                            | 0.092908859                               |
| 33.79604944                              | 103.2746515                                       | -0.221121416                            | 0.085682104                               |
| 45.94422844                              | 88.61268997                                       | -0.922147194                            | 0.094524072                               |
| 65.80595149                              | 139.6205988                                       | -0.209791837                            | 0.062919613                               |
| 57.44048576                              | 117.9580517                                       | -0.33070478                             | 0.070228732                               |
| 40.96738205                              | 91.17012477                                       | -1.028622235                            | 0.091320554                               |
| 29.97564749                              | 108.1916971                                       | -0.039864917                            | 0.085576726                               |
| 27.85690419                              | 76.37242901                                       | -1.03371087                             | 0.110127815                               |
| 43.75659952                              | 87.50054167                                       | -0.767526045                            | 0.0979601                                 |
| 31.66079498                              | 71.48263168                                       | -1.223203344                            | 0.113346903                               |
| 61.73380281                              | 119.6520405                                       | -0.458638617                            | 0.070332628                               |
| 54.26028843                              | 105.8234929                                       | -0.970998294                            | 0.081757175                               |
| 51.53874741                              | 119.7024332                                       | -0.394112373                            | 0.072551293                               |
| 33.23437324                              | 78.22099721                                       | -0.432508329                            | 0.106213353                               |
| 40.75635544                              | 71.93600845                                       | -0.984377401                            | 0.110675906                               |
| 42.41102003                              | 69.90312338                                       | -0.628378915                            | 0.118287744                               |
| 24.16006299                              | 95.77993584                                       | -1.324005593                            | 0.099132791                               |
| 45.11920802                              | 135.7777834                                       | -0.136812409                            | 0.067513873                               |
| 36.71720498                              | 81.37037492                                       | -0.813458707                            | 0.1024406                                 |
| 61.8128747                               | 173.3264008                                       | 0.033646375                             | 0.055272181                               |
| 46.04489051                              | 111.9103031                                       | -0.618109748                            | 0.077674403                               |
| 59.5748991                               | 111.6477356                                       | -1.016438416                            | 0.07615364                                |
| 42.87277635                              | 97.50202394                                       | -0.851458511                            | 0.086694047                               |
| 40.83004535                              | 106.5166435                                       | -0.249813733                            | 0.078433316                               |
| 42.90517955                              | 99.21392393                                       | -0.428957669                            | 0.084901175                               |
| 24.17345058                              | 74.74661374                                       | -0.75955829                             | 0.116678376                               |
| 52.56075346                              | 115.5718322                                       | -0.725468044                            | 0.073425748                               |
| 35.16177222                              | 92.16200507                                       | -0.033899547                            | 0.101734008                               |
| 59.15478318                              | 122.4184339                                       | -0.799160976                            | 0.071774872                               |
| 63.31923539                              | 145.4872303                                       | -0.284813018                            | 0.061316175                               |
| 36.12123342                              | 107.2485747                                       | -0.451961354                            | 0.08132146                                |
| 33.93709168                              | 101.639941                                        | -0.009092199                            | 0.088781243                               |
| 40.07024942                              | 105.9446619                                       | -0.329210725                            | 0.080633162                               |
| 34.2570178                               | 91.12479579                                       | -0.986647992                            | 0.092978304                               |
| 46.20917428                              | 123.4959373                                       | -0.631809392                            | 0.071430828                               |
| 41.54617081                              | 85.02074718                                       | -0.987427669                            | 0.095269149                               |
| 41.2589832                               | 98.52131796                                       | -0.873142391                            | 0.086147375                               |
| 52.34247128                              | 128.9169121                                       | -0.544300299                            | 0.071073909                               |
| 34.61768402                              | 71.77904786                                       | -0.234137554                            | 0.108833137                               |
| 45.91197959                              | 97.32590598                                       | -1.063121853                            | 0.085520627                               |
| 48.91616684                              | 107.0062239                                       | -0.570207285                            | 0.080759696                               |
| 44.54525678                              | 104.3939342                                       | -0.418792413                            | 0.082706046                               |
| 24.90641141                              | 85.91940773                                       | -0.303159544                            | 0.097638199                               |
| 37.44650386                              | 78.46168208                                       | -0.84708889                             | 0.103072307                               |
| 29.23846337                              | 69.45911407                                       | -1.464467637                            | 0.117200732                               |
| 47.99964956                              | 100.2508526                                       | -0.534936318                            | 0.08470697                                |
| 47.17162451                              | 112.113863                                        | -0.727325301                            | 0.077305279                               |
| 21.59235972                              | 72.19501334                                       | -0.920842599                            | 0.118093152                               |
| 35.36067391                              | 93.65458536                                       | -0.673288071                            | 0.088380296                               |
| 42.03327166                              | 85.37251085                                       | -0.775060284                            | 0.098358409                               |
| 44.7079302                               | 99.4317162                                        | -0.638620563                            | 0.083363545                               |
| 68.22613566                              | 148.2910137                                       | -0.723062683                            | 0.061537922                               |
| 51.94838802                              | 148.2880039                                       | -0.153576503                            | 0.060624425                               |
| 37.47819709                              | 85.82820022                                       | -1.224993034                            | 0.096341737                               |
| 24.91394315                              | 81.59211302                                       | -0.078706839                            | 0.103716615                               |
| 32.70906045                              | 75.33009148                                       | -0.814481589                            | 0.106973034                               |
| 30.78307217                              | 91.11631918                                       | -0.740398486                            | 0.096072583                               |
| 69.91054811                              | 152.96245                                         | -0.617616792                            | 0.062770601                               |
| 82.49963784                              | 132.1028938                                       | -1.013117998                            | 0.063704068                               |
| 45.78102642                              | 101.4880161                                       | -0.669791715                            | 0.08109162                                |
| 38.73614051                              | 87.69015598                                       | -0.421147604                            | 0.094364864                               |
| 25.70918479                              | 91.43479919                                       | -0.525036959                            | 0.09668656                                |
| 53.1083414                               | 124.3814249                                       | -0.636612244                            | 0.070808666                               |
| 15.78644425                              | 46.91928311                                       | -0.984541238                            | 0.164294869                               |
| 54.59376809                              | 123.54422                                         | -0.673247727                            | 0.072544278                               |
| 38.82779478                              | 105.1271127                                       | -0.580159028                            | 0.086176296                               |
| 35.52421415                              | 89.82847043                                       | -1.190689946                            | 0.096473842                               |
| 33.85304328                              | 77.06096965                                       | -1.200991513                            | 0.107603841                               |
| 21.43383275                              | 50.52889243                                       | 0.435421868                             | 0.156402904                               |
| 46.77541072                              | 140.1661305                                       | -0.245246296                            | 0.065851781                               |
| 49.27320901                              | 113.6206226                                       | -0.625062594                            | 0.074806701                               |
| 39.96381526                              | 92.18257464                                       | -0.849379073                            | 0.090509826                               |
| 43.73157446                              | 131.4912977                                       | -0.569090943                            | 0.071964251                               |
| 59.74322901                              | 92.5260663                                        | -1.081414453                            | 0.090792005                               |
| 38.23124554                              | 103.8363132                                       | -0.427200198                            | 0.083535243                               |
| 46.71263794                              | 83.395998                                         | -1.311738114                            | 0.098425574                               |
| 24.19930292                              | 75.38643599                                       | -1.246356538                            | 0.113905998                               |
| 28.12062956                              | 65.53709668                                       | -0.097443837                            | 0.122815701                               |

| log.sigma.2.0.mm.3D_firstorder_MeanAbsoluteDeviation | log.sigma.2.0.mm.3D_firstorder_Energy | log.sigma.2.0.mm.3D_firstorder_RobustMeanAbsoluteDeviation | log.sigma.2.0.mm.3D_firstorder_Median |
|------------------------------------------------------|---------------------------------------|------------------------------------------------------------|---------------------------------------|
| 106.2942681                                          | 46908717.91                           | 62.69122234                                                | 43.34813499                           |
| 56.46076447                                          | 8352505.852                           | 29.83733366                                                | 38.32665634                           |
| 63.66493362                                          | 14460566.33                           | 37.76807074                                                | 29.21935368                           |
| 92.45450486                                          | 15267693.61                           | 57.10140028                                                | 39.37636948                           |
| 75.96108068                                          | 28320622.97                           | 44.40326548                                                | 38.80828285                           |
| 89.57070675                                          | 11747080.75                           | 52.20641711                                                | 37.7722252                            |
| 71.83558397                                          | 63895848.12                           | 43.12724472                                                | 31.97363472                           |
| 68.2104075                                           | 60293472.83                           | 37.04062666                                                | 38.12592697                           |
| 80.62163462                                          | 62196620.45                           | 49.82340855                                                | 48.6916256                            |
| 78.06676431                                          | 15022131.79                           | 46.53707527                                                | 55.78208351                           |
| 64.27875133                                          | 12681027.19                           | 40.63617813                                                | 32.3696804                            |
| 82.49605853                                          | 38500798.69                           | 47.24263639                                                | 56.01924515                           |
| 52.56906346                                          | 15308674.77                           | 24.17724047                                                | 20.07188606                           |
| 85.27585713                                          | 28988102.7                            | 47.20562038                                                | 39.35081482                           |
| 89.19936422                                          | 35432276                              | 49.53621196                                                | 47.52552605                           |
| 68.09001004                                          | 47343679.5                            | 37.75982829                                                | 27.94479084                           |
| 82.19983632                                          | 14503703.07                           | 54.13516017                                                | 36.92318344                           |
| 54.74066113                                          | 9912103.146                           | 28.22084893                                                | 30.08559799                           |
| 57.49029331                                          | 8970624.352                           | 36.04256362                                                | 29.8139143                            |
| 79.04447517                                          | 74001875.86                           | 46.16981736                                                | 43.43123627                           |
| 53.14070803                                          | 21393274.82                           | 29.04588538                                                | 26.19895363                           |
| 64.40205675                                          | 9629149.251                           | 40.48577444                                                | 44.27323151                           |
| 68.26696959                                          | 10768195.01                           | 39.66756453                                                | 33.74994087                           |
| 69.4437499                                           | 26958172.61                           | 43.7232205                                                 | 34.30535889                           |
| 72.97213918                                          | 18238522.93                           | 40.82666607                                                | 44.68996048                           |
| 96.47261674                                          | 48276543.84                           | 59.40777769                                                | 54.36984634                           |
| 89.58803927                                          | 54255190                              | 54.00442988                                                | 41.65710068                           |
| 70.82234884                                          | 31496766.3                            | 40.04418762                                                | 33.48308372                           |
| 68.75603351                                          | 4175036.563                           | 45.60865504                                                | 38.47058868                           |
| 59.40183275                                          | 17693473.76                           | 33.81356414                                                | 42.45627785                           |
| 69.62637738                                          | 58665025.08                           | 38.51946409                                                | 35.25136757                           |
| 62.85501796                                          | 18190927.11                           | 33.2260833                                                 | 24.24621964                           |
| 89.32200445                                          | 50607748.91                           | 54.21319168                                                | 34.20747757                           |
| 81.28693115                                          | 34734142.75                           | 46.85847475                                                | 38.41852379                           |
| 84.25369148                                          | 70516123.93                           | 52.40103327                                                | 53.11214447                           |
| 64.09066242                                          | 30325398.27                           | 35.6448317                                                 | 30.68908119                           |
| 66.50976563                                          | 42683637.08                           | 32.91663833                                                | 23.6017189                            |
| 66.96005269                                          | 58701249.19                           | 34.28143991                                                | 17.88962936                           |
| 62.51418398                                          | 9254155.992                           | 40.57255562                                                | 33.94823456                           |
| 84.8020289                                           | 90446682.04                           | 57.07775761                                                | 26.55885887                           |
| 67.07681737                                          | 24945060.78                           | 36.97712134                                                | 25.5360126                            |
| 102.5508387                                          | 66068890.97                           | 71.29510567                                                | 27.08517265                           |
| 79.02826471                                          | 49294497.41                           | 48.19355236                                                | 42.88116455                           |
| 87.64385713                                          | 40052400.59                           | 50.35889016                                                | 42.20925903                           |
| 74.12681365                                          | 18565497.72                           | 43.25261455                                                | 54.41036415                           |
| 78.72728269                                          | 37589488.01                           | 48.06852585                                                | 44.07117081                           |
| 75.11371642                                          | 58581697.01                           | 43.66582539                                                | 37.28591156                           |
| 56.33674294                                          | 7021684.198                           | 32.17169905                                                | 44.88129044                           |
| 88.72886615                                          | 14013593.65                           | 53.43550897                                                | 55.02572632                           |
| 68.51398164                                          | 15108877.64                           | 42.06583057                                                | 33.99014282                           |
| 86.80321662                                          | 45468796.09                           | 52.41627674                                                | 54.04975891                           |
| 96.27184264                                          | 58139436.85                           | 62.70024431                                                | 42.5905571                            |
| 74.7459433                                           | 50743550.37                           | 46.2385229                                                 | 37.74530602                           |
| 69.49211261                                          | 12557919.52                           | 43.01868936                                                | 41.57166481                           |
| 75.1079586                                           | 16374368.63                           | 47.15326244                                                | 45.15870094                           |
| 68.32418914                                          | 20344137.41                           | 39.76704937                                                | 38.5363419                            |
| 84.02697435                                          | 57911872.17                           | 53.03085672                                                | 48.4139595                            |
| 69.88990202                                          | 37125849.15                           | 38.74412284                                                | 26.36332798                           |
| 75.09973783                                          | 19892964.2                            | 43.16695654                                                | 35.22909927                           |
| 85.76817929                                          | 124822906.1                           | 55.13832796                                                | 15.76961327                           |
| 66.93531909                                          | 20410279.97                           | 34.0967635                                                 | 32.89053726                           |
| 75.48509218                                          | 35996358.45                           | 44.15481138                                                | 42.13403702                           |
| 79.17953659                                          | 82592472.79                           | 47.87528946                                                | 43.81999207                           |
| 76.53306817                                          | 94135306.15                           | 44.97783289                                                | 32.25117874                           |
| 61.43208378                                          | 6604524.086                           | 38.95525766                                                | 41.73044586                           |
| 66.25269651                                          | 41012520.05                           | 35.20394743                                                | 26.7486496                            |
| 58.89057478                                          | 10960821.11                           | 30.66547676                                                | 21.87951851                           |
| 77.43488462                                          | 7874885.121                           | 44.50998093                                                | 32.18913269                           |
| 80.18374472                                          | 78871104.49                           | 49.08434198                                                | 46.5160141                            |
| 54.72317744                                          | 21215383.17                           | 31.27323084                                                | 30.87769794                           |
| 71.00653984                                          | 13179447.75                           | 43.14358347                                                | 32.9053066                            |
| 69.66312969                                          | 54041422.17                           | 38.88626365                                                | 39.87161827                           |
| 78.19796475                                          | 31487064.25                           | 44.78119965                                                | 39.0798378                            |
| 102.9296783                                          | 42094163.7                            | 65.64101965                                                | 36.27468872                           |
| 94.53600854                                          | 48202925.23                           | 63.52197958                                                | 28.36506844                           |
| 70.0641736                                           | 14452253.46                           | 39.63543472                                                | 38.35389519                           |
| 60.29419874                                          | 21050293.25                           | 35.36428627                                                | 37.46187019                           |
| 63.50543849                                          | 9571152.953                           | 34.46494507                                                | 33.92841339                           |
| 65.39378478                                          | 15904117.06                           | 39.29473839                                                | 37.26826859                           |
| 97.91121721                                          | 40052848.31                           | 63.16066697                                                | 31.77416611                           |
| 104.3445828                                          | 42988796.26                           | 61.18091047                                                | 43.78559113                           |
| 83.92407381                                          | 25358589.73                           | 48.45730952                                                | 27.80975723                           |
| 69.65068735                                          | 36853223.3                            | 39.22026353                                                | 29.69802475                           |
| 61.06551343                                          | 21928680.27                           | 39.76281224                                                | 34.87512589                           |
| 87.68367568                                          | 36478368.31                           | 54.11416562                                                | 38.34881592                           |
| 40.72707636                                          | 6614195.908                           | 21.68191107                                                | 22.39048672                           |
| 89.87320289                                          | 35816693.31                           | 54.81877876                                                | 27.70437431                           |
| 74.85030917                                          | 37115446.83                           | 45.95080053                                                | 45.67763519                           |
| 66.58254797                                          | 16108819.46                           | 38.39769674                                                | 42.59773636                           |
| 62.96710975                                          | 20086068.96                           | 34.23017093                                                | 37.47917557                           |
| 49.41038443                                          | 8403633.148                           | 26.04371862                                                | 22.86856461                           |
| 87.49291411                                          | 36967447.57                           | 58.35250305                                                | 51.36606216                           |
| 84.21321012                                          | 71561814.19                           | 51.07154342                                                | 35.04364395                           |
| 70.58723905                                          | 38219990.28                           | 41.07621834                                                | 42.29588127                           |
| 83.9423098                                           | 53623289.87                           | 55.32089617                                                | 35.67720985                           |
| 80.27773689                                          | 54694470.32                           | 43.05438416                                                | 33.76245308                           |
| 73.73065167                                          | 29303840.5                            | 45.63862153                                                | 32.50619125                           |
| 74.71479041                                          | 12665556.67                           | 39.24382507                                                | 24.82598114                           |
| 56.6558145                                           | 5395184.353                           | 33.55220615                                                | 28.28917217                           |
| 58.8578088                                           | 52330503.67                           | 31.71940836                                                | 29.20246983                           |

| log.sigma.2.0.mm.3D_firstorder_TotalEnergy | log.sigma.2.0.mm.3D_firstorder_Maximum | log.sigma.2.0.mm.3D_firstorder_RootMeanSquared | log.sigma.2.0.mm.3D_firstorder_90Percentile | log.sigma.2.0.mm.3D_firstorder_Minimum |
|--------------------------------------------|----------------------------------------|------------------------------------------------|---------------------------------------------|----------------------------------------|
| 1266535384                                 | 420.7990112                            | 148.680527                                     | 184.347161                                  | -603.286211                            |
| 225517658                                  | 369.5023499                            | 94.51540266                                    | 126.0351761                                 | -371.4686584                           |
| 390435290.9                                | 376.7020569                            | 37.09122287                                    | 154.94561                                   | -321.0200195                           |
| 412227727.5                                | 337.9416199                            | 125.0084689                                    | 145.6776611                                 | -489.5667114                           |
| 764656820.1                                | 356.1592102                            | 109.3605164                                    | 139.2595856                                 | -447.706665                            |
| 317171180.2                                | 460.0400391                            | 133.4114208                                    | 212.2285049                                 | -458.6706543                           |
| 1725187899                                 | 524.3804321                            | 106.3343709                                    | 159.1684418                                 | -478.7298279                           |
| 1627923766                                 | 448.0793762                            | 108.6449903                                    | 160.1794815                                 | -453.6217041                           |
| 1679308755                                 | 464.1495361                            | 116.9684347                                    | 164.6295929                                 | -494.2208252                           |
| 405597558.3                                | 370.3818054                            | 118.3772894                                    | 174.471727                                  | -406.5899353                           |
| 342387734.1                                | 338.1616516                            | 91.70152247                                    | 133.2217896                                 | -339.6825867                           |
| 1039521565                                 | 447.7078552                            | 129.2407306                                    | 179.1243225                                 | -506.2695313                           |
| 413334218.8                                | 372.7804871                            | 90.55170652                                    | 108.9857254                                 | -455.2427673                           |
| 782678772.9                                | 424.1105347                            | 129.9345803                                    | 171.9083862                                 | -628.6890869                           |
| 956671451.9                                | 514.0289917                            | 133.6376073                                    | 169.221138                                  | -489.5161743                           |
| 1278279346                                 | 386.2249756                            | 104.0141315                                    | 149.6697464                                 | -522.6132202                           |
| 391599983                                  | 329.0481873                            | 110.2141325                                    | 157.4504547                                 | -382.8464661                           |
| 267626784.9                                | 328.2364197                            | 89.66054369                                    | 132.0055084                                 | -395.4940796                           |
| 242206857.5                                | 443.7049561                            | 83.13310263                                    | 116.5203079                                 | -387.1933289                           |
| 1998050648                                 | 459.2680969                            | 119.3057721                                    | 173.8626801                                 | -492.7899475                           |
| 577618420.1                                | 340.9581299                            | 84.11002105                                    | 123.6151207                                 | -383.2209778                           |
| 259987029.8                                | 324.1816101                            | 94.46767717                                    | 140.3183502                                 | -374.6051636                           |
| 290741265.2                                | 314.9998474                            | 102.54665                                      | 145.7554031                                 | -506.9171448                           |
| 727870660.4                                | 346.6098938                            | 100.9179115                                    | 153.7339569                                 | -385.4235535                           |
| 492440119.1                                | 439.0002441                            | 119.6962736                                    | 180.3369019                                 | -440.0652466                           |
| 1303466684                                 | 516.6212769                            | 142.7531023                                    | 208.9986115                                 | -541.5789185                           |
| 1464890130                                 | 446.0139771                            | 129.5441459                                    | 190.3888458                                 | -462.8243713                           |
| 850412690.2                                | 367.2948303                            | 106.7876789                                    | 143.0708191                                 | -493.2597656                           |
| 112725987.2                                | 278.2957764                            | 96.64433009                                    | 150.2465118                                 | -344.3725586                           |
| 477723791.5                                | 327.2139893                            | 92.81247062                                    | 121.3031128                                 | -458.131134                            |
| 1583955677                                 | 559.473999                             | 111.039478                                     | 158.5914825                                 | -544.8522949                           |
| 491155032                                  | 265.9990234                            | 93.76638471                                    | 106.8466232                                 | -435.2268982                           |
| 1366409221                                 | 552.3768921                            | 125.1913975                                    | 167.4255188                                 | -469.1513672                           |
| 937821854.4                                | 368.0952759                            | 121.5750233                                    | 165.9832596                                 | -517.9677734                           |
| 1903935346                                 | 571.9942017                            | 126.537882                                     | 189.2710999                                 | -460.4274902                           |
| 818785753.4                                | 425.1529236                            | 100.5576288                                    | 152.9045349                                 | -428.7988892                           |
| 1152458201                                 | 559.6037598                            | 107.1028122                                    | 119.7290573                                 | -664.5374756                           |
| 1584933728                                 | 580.5288696                            | 106.6489888                                    | 148.2854004                                 | -619.2839355                           |
| 249862211.8                                | 236.1231384                            | 86.73928786                                    | 107.9278702                                 | -459.0945435                           |
| 2442060415                                 | 443.6293335                            | 111.5396082                                    | 159.0309357                                 | -383.3331909                           |
| 673516641                                  | 372.6430359                            | 98.06347916                                    | 117.6396072                                 | -391.6446228                           |
| 1783860056                                 | 506.7790833                            | 130.7107849                                    | 183.0949402                                 | -392.6195068                           |
| 1330951430                                 | 410.0500488                            | 116.1647562                                    | 117.4350525                                 | -467.3510437                           |
| 1081414816                                 | 482.0860901                            | 126.8788073                                    | 151.7280029                                 | -541.6867065                           |
| 501268438.6                                | 388.4246216                            | 120.5279782                                    | 184.6571762                                 | -474.8524475                           |
| 1014916176                                 | 549.5076904                            | 117.0205219                                    | 180.087439                                  | -393.2063599                           |
| 1581705819                                 | 468.9138184                            | 113.3191566                                    | 161.1960327                                 | -467.5445557                           |
| 189585473.3                                | 352.4931335                            | 89.78660885                                    | 115.7255707                                 | -358.5480347                           |
| 378367028.6                                | 409.0917358                            | 128.324618                                     | 173.473999                                  | -381.6766357                           |
| 407939696.3                                | 379.548645                             | 105.7128439                                    | 189.047937                                  | -352.707428                            |
| 1227657494                                 | 451.3481445                            | 133.0376839                                    | 195.3528107                                 | -534.8790283                           |
| 1569764795                                 | 550.744812                             | 131.327608                                     | 185.5452576                                 | -457.5033875                           |
| 1370075860                                 | 411.3849487                            | 106.0488295                                    | 147.5323303                                 | -405.3531799                           |
| 339063827.2                                | 406.0187988                            | 106.6533033                                    | 162.8910065                                 | -335.9253235                           |
| 442107953                                  | 352.5338745                            | 110.9574484                                    | 176.6126633                                 | -467.0833435                           |
| 549291710.2                                | 337.6738586                            | 102.1415243                                    | 135.8910568                                 | -408.5422058                           |
| 1563620548                                 | 366.5584106                            | 119.6532611                                    | 174.2464844                                 | -451.8594666                           |
| 1002397927                                 | 418.8126221                            | 103.6157329                                    | 125.1002106                                 | -516.1085815                           |
| 537110033.5                                | 443.1963196                            | 109.8679818                                    | 134.9060837                                 | -499.0020142                           |
| 3370218465                                 | 429.0426025                            | 116.9325825                                    | 160.8307861                                 | -490.6062317                           |
| 551077559.3                                | 446.4075317                            | 107.5051158                                    | 153.030811                                  | -419.4920044                           |
| 971901678.3                                | 387.1003113                            | 116.111077                                     | 167.7920441                                 | -623.5772705                           |
| 2229996765                                 | 396.328949                             | 119.4451334                                    | 186.2251709                                 | -508.0003052                           |
| 2541653266                                 | 409.789978                             | 111.125393                                     | 145.3555237                                 | -513.6020508                           |
| 178322150.3                                | 326.4549561                            | 91.43389454                                    | 149.8337845                                 | -236.9606171                           |
| 110738041                                  | 404.5033569                            | 103.0509721                                    | 131.4496262                                 | -494.3942871                           |
| 295942169.9                                | 326.6804504                            | 91.68171933                                    | 103.5120277                                 | -505.0982971                           |
| 2126218983                                 | 509.4769897                            | 112.2489029                                    | 138.0483749                                 | -536.2751465                           |
| 2129681821                                 | 543.2871094                            | 116.0480555                                    | 156.8431396                                 | -522.6522827                           |
| 572815345.6                                | 281.5973511                            | 85.56107834                                    | 125.1905594                                 | -458.5342712                           |
| 355845089.3                                | 328.7114563                            | 100.7265666                                    | 143.7008728                                 | -406.0599365                           |
| 1459118399                                 | 477.549469                             | 112.2366611                                    | 174.1878326                                 | -596.1109009                           |
| 850150734.8                                | 465.2875977                            | 117.5422291                                    | 161.7711334                                 | -442.3901672                           |
| 1136542420                                 | 417.3367004                            | 136.5063415                                    | 167.8951599                                 | -496.8492737                           |
| 1301478981                                 | 467.1349182                            | 124.0781083                                    | 175.1968536                                 | -379.4489746                           |
| 390210843.5                                | 339.3804016                            | 103.7747096                                    | 126.6673431                                 | -443.7966614                           |
| 568357917.9                                | 461.6610413                            | 93.73152184                                    | 135.7153473                                 | -380.6152344                           |
| 258421129.7                                | 361.3120422                            | 99.95381477                                    | 136.0526962                                 | -406.362915                            |
| 429411160.5                                | 349.8580017                            | 96.52460236                                    | 127.0809708                                 | -478.1042786                           |
| 1081426904                                 | 526.8566895                            | 130.8583958                                    | 155.7468079                                 | -527.269104                            |
| 1160697499                                 | 420.7990112                            | 147.0145269                                    | 184.6094482                                 | -603.286211                            |
| 684681922.6                                | 401.533447                             | 118.7263091                                    | 133.8296021                                 | -439.039661                            |
| 995037029.1                                | 401.4414063                            | 106.1769581                                    | 149.5828461                                 | -496.6311646                           |
| 592074367.3                                | 267.2674255                            | 84.47437117                                    | 121.6886459                                 | -341.7389526                           |
| 984915944.4                                | 469.6672363                            | 122.2958731                                    | 164.1570374                                 | -443.3758545                           |
| 178583289.5                                | 230.6509705                            | 65.7066226                                     | 92.42597733                                 | -390.9495239                           |
| 967050719.4                                | 487.4481201                            | 122.5458342                                    | 144.2330231                                 | -431.598114                            |
| 1002117064                                 | 357.6930237                            | 116.343901                                     | 184.6614182                                 | -439.0662231                           |
| 434938125.4                                | 361.6665649                            | 104.8965775                                    | 150.1503906                                 | -466.757782                            |
| 542323861.9                                | 327.4123535                            | 99.59440948                                    | 128.6022919                                 | -501.5137024                           |
| 226898095                                  | 302.2282715                            | 80.2776678                                     | 142.2557465                                 | -421.5263367                           |
| 998121084.3                                | 425.368927                             | 124.5772828                                    | 196.4589157                                 | -409.4134216                           |
| 1932168983                                 | 517.6610107                            | 117.5033008                                    | 147.501535                                  | -446.0913086                           |
| 1031939738                                 | 323.7414856                            | 107.6188424                                    | 159.8531342                                 | -377.5785828                           |
| 1447828826                                 | 425.0645752                            | 111.0023784                                    | 142.8772873                                 | -459.6361694                           |
| 1476750699                                 | 429.4558716                            | 126.4246348                                    | 171.3298813                                 | -578.8122559                           |
| 791203693.4                                | 405.5907288                            | 101.9926433                                    | 133.1375061                                 | -373.6712952                           |
| 341970030                                  | 389.0484314                            | 109.9863527                                    | 109.4888884                                 | -612.0802002                           |
| 145669977.5                                | 222.3055267                            | 80.43037975                                    | 95.79697571                                 | -334.3161011                           |
| 1412923599                                 | 418.7635498                            | 95.20046454                                    | 152.4752502                                 | -430.9025269                           |

| log.sigma.2.0.mm.3D_firstorder_Entropy | log.sigma.2.0.mm.3D_firstorder_StandardDeviation | log.sigma.2.0.mm.3D_firstorder_Range | log.sigma.2.0.mm.3D_firstorder_Variance | log.sigma.2.0.mm.3D_firstorder_10Percentile |
|----------------------------------------|--------------------------------------------------|--------------------------------------|-----------------------------------------|---------------------------------------------|
| 4.413924297                            | 146.9835081                                      | 1024.085632                          | 21604.15164                             | -184.7759064                                |
| 3.571171246                            | 85.57682418                                      | 740.9710083                          | 7323.392837                             | -43.64656219                                |
| 3.739436167                            | 89.30717624                                      | 697.7220764                          | 7975.771727                             | -54.85762863                                |
| 4.160944778                            | 124.0314647                                      | 827.5083313                          | 15383.80424                             | -151.5912323                                |
| 3.977814537                            | 106.3442183                                      | 803.8658752                          | 11309.09276                             | -106.1923264                                |
| 4.231117666                            | 126.4046549                                      | 918.7106934                          | 15978.13679                             | -104.4804443                                |
| 3.953662993                            | 100.1658759                                      | 1003.11026                           | 10033.2027                              | -79.27910614                                |
| 3.840388631                            | 101.0891517                                      | 901.7010803                          | 10219.01659                             | -64.40208817                                |
| 4.093998574                            | 110.1919962                                      | 958.3703613                          | 12142.27602                             | -97.3693161                                 |
| 4.016209092                            | 108.789877                                       | 776.9717407                          | 11835.23734                             | -85.57181778                                |
| 3.776305453                            | 86.69521986                                      | 677.8442383                          | 7516.061146                             | -72.3728096                                 |
| 4.10535068                             | 119.8211364                                      | 953.9773865                          | 14357.10472                             | -74.96689911                                |
| 3.998450675                            | 87.9094853                                       | 828.0232544                          | 7728.077606                             | -45.3142662                                 |
| 4.171009494                            | 125.8404328                                      | 1052.799622                          | 15835.81454                             | -112.8814987                                |
| 4.18792498                             | 128.9181863                                      | 1003.545166                          | 16619.89877                             | -122.5132431                                |
| 3.855083824                            | 100.411534                                       | 908.8381958                          | 10082.47615                             | -81.79285049                                |
| 4.092779526                            | 106.5591555                                      | 711.8946533                          | 11354.85362                             | -118.6655396                                |
| 3.51700086                             | 83.40652423                                      | 723.7304993                          | 6956.648284                             | -46.06263428                                |
| 3.620561287                            | 78.38050707                                      | 830.8982849                          | 6143.503889                             | -67.74461746                                |
| 4.087402518                            | 112.2502035                                      | 952.0580444                          | 12600.10818                             | -88.68990021                                |
| 3.506953198                            | 78.49072108                                      | 724.1791077                          | 6160.793295                             | -48.67212448                                |
| 3.767825264                            | 86.78443584                                      | 698.7867737                          | 7531.538305                             | -67.21899567                                |
| 3.86446844                             | 97.70210792                                      | 821.9169922                          | 9545.701891                             | -75.73118057                                |
| 3.89878965                             | 93.72718086                                      | 732.0334473                          | 8784.784433                             | -72.0620697                                 |
| 3.925684603                            | 109.6873879                                      | 979.0654907                          | 12031.32307                             | -58.75283813                                |
| 4.367586893                            | 131.8313481                                      | 958.2001953                          | 17379.50434                             | -97.95409546                                |
| 4.250585777                            | 123.535043                                       | 908.8383484                          | 15260.52668                             | -119.1488968                                |
| 3.909910847                            | 103.1952822                                      | 860.5545959                          | 10649.26626                             | -80.28557434                                |
| 3.830982442                            | 89.45789517                                      | 622.668335                           | 8002.715008                             | -68.76737213                                |
| 3.651825719                            | 86.26236857                                      | 785.3451233                          | 7441.196231                             | -63.31716499                                |
| 3.887432711                            | 104.3420983                                      | 1104.326294                          | 10887.27348                             | -64.04822083                                |
| 3.670125733                            | 92.94018069                                      | 701.2259216                          | 8637.877187                             | -105.6613434                                |
| 4.242179586                            | 122.6794619                                      | 1021.528259                          | 1021.528259                             | -130.7633728                                |
| 4.089054035                            | 117.1262024                                      | 886.0630493                          | 13718.54729                             | -100.7685928                                |
| 4.168668901                            | 115.0166971                                      | 1032.421692                          | 13228.84062                             | -88.60471497                                |
| 3.760976977                            | 94.11989116                                      | 853.9518127                          | 8858.553912                             | -56.06045609                                |
| 3.789106524                            | 105.5524665                                      | 1224.141235                          | 11141.32319                             | -83.82523346                                |
| 3.764439903                            | 103.8550357                                      | 1199.812805                          | 10785.86844                             | -76.81665802                                |
| 3.654077379                            | 84.31053103                                      | 695.2176819                          | 7108.265643                             | -76.06635284                                |
| 4.159063019                            | 108.9196364                                      | 826.9625244                          | 11863.48719                             | -118.4218826                                |
| 3.791934142                            | 96.90445464                                      | 764.2876587                          | 9390.47333                              | -112.1094223                                |
| 4.40268978                             | 128.8315141                                      | 899.3985901                          | 16597.55903                             | -149.221579                                 |
| 4.082387516                            | 109.3033636                                      | 877.4010925                          | 11947.22529                             | -88.6580719                                 |
| 4.17281161                             | 124.100252                                       | 1023.772797                          | 15400.87255                             | -128.3795044                                |
| 3.956024242                            | 107.0553417                                      | 863.2770691                          | 11460.84618                             | -46.12942047                                |
| 4.074333173                            | 108.3063426                                      | 942.7140503                          | 11730.26385                             | -87.74477997                                |
| 4.015525965                            | 106.9719731                                      | 936.458374                           | 11443.00303                             | -81.12947159                                |
| 3.552518577                            | 81.80870566                                      | 711.0411682                          | 6692.664322                             | -57.73179245                                |
| 4.172998469                            | 121.6460837                                      | 790.7683716                          | 14797.76968                             | -122.897583                                 |
| 3.775239022                            | 94.09631528                                      | 732.256073                           | 8854.116548                             | -49.26668358                                |
| 4.20860885                             | 122.2421198                                      | 986.2271729                          | 14943.13585                             | -80.77485504                                |
| 4.348459603                            | 126.6964918                                      | 1008.248199                          | 16052.00102                             | -133.8718719                                |
| 3.998629973                            | 101.4563157                                      | 816.7381287                          | 10293.38399                             | -95.42070923                                |
| 3.885005138                            | 94.52540367                                      | 741.9441223                          | 8935.05194                              | -56.1076767                                 |
| 3.996943425                            | 101.5644096                                      | 819.617218                           | 10315.32929                             | -78.02925873                                |
| 3.855243296                            | 97.32638398                                      | 746.2160645                          | 9472.425019                             | -79.05037079                                |
| 4.14930164                             | 112.647912                                       | 818.4178772                          | 12689.55207                             | -111.6629456                                |
| 3.882097924                            | 102.0983585                                      | 934.9212036                          | 10424.07481                             | -100.7065796                                |
| 3.980040677                            | 107.2839546                                      | 942.1983337                          | 11509.84693                             | -96.50723495                                |
| 4.17595552                             | 115.3407589                                      | 919.6488342                          | 13303.49067                             | -115.0615997                                |
| 3.806489495                            | 101.8780763                                      | 865.8995361                          | 10379.14244                             | -72.58164215                                |
| 3.998513598                            | 109.2938345                                      | 1010.677582                          | 11945.14225                             | -78.86386449                                |
| 4.067894435                            | 110.4556849                                      | 904.3292542                          | 12200.45832                             | -85.28384857                                |
| 4.032672179                            | 107.6900525                                      | 923.3920288                          | 11597.14741                             | -94.98615875                                |
| 3.696652389                            | 82.50349326                                      | 563.4155731                          | 6806.8264                               | -63.86446342                                |
| 3.815294639                            | 100.242274                                       | 898.897644                           | 10048.51349                             | -77.51758041                                |
| 3.618818225                            | 90.71406469                                      | 831.7787476                          | 8229.041532                             | -73.67938919                                |
| 4.042115439                            | 109.9771713                                      | 1045.752136                          | 12094.97821                             | -112.8763878                                |
| 4.086561186                            | 110.492959                                       | 1065.939392                          | 12208.694                               | -102.3205704                                |
| 3.54723758                             | 80.22099987                                      | 740.1316223                          | 6435.40882                              | -48.9084465                                 |
| 3.912776308                            | 97.60955761                                      | 734.7713928                          | 9527.625736                             | -100.3667038                                |
| 3.869509828                            | 103.4679661                                      | 1073.66037                           | 10705.62                                | -56.48821259                                |
| 4.050992937                            | 112.0968039                                      | 907.6777649                          | 12565.69344                             | -98.63355713                                |
| 4.375523524                            | 135.6624865                                      | 914.1859741                          | 18404.31024                             | -178.8269318                                |
| 4.314478309                            | 121.8884076                                      | 846.5838928                          | 14856.7839                              | -138.0943604                                |
| 3.840097726                            | 100.8766727                                      | 783.177063                           | 10176.10309                             | -98.8534919                                 |
| 3.703956581                            | 85.33674498                                      | 842.2762756                          | 7282.360043                             | -55.38337135                                |
| 3.748373855                            | 95.16790972                                      | 767.6749573                          | 9056.93104                              | -74.28450317                                |
| 3.791545581                            | 91.84509261                                      | 827.9622803                          | 8435.521037                             | -76.78957214                                |
| 4.334736254                            | 130.0397827                                      | 1054.125793                          | 16910.34508                             | -154.6939972                                |
| 4.397203635                            | 144.9955838                                      | 1024.085632                          | 21023.71932                             | -175.2858337                                |
| 4.11722533                             | 118.0599522                                      | 840.5873108                          | 13938.15231                             | -146.0095093                                |
| 3.905458325                            | 101.2759487                                      | 898.0725708                          | 10256.81778                             | -81.08644562                                |
| 3.680830277                            | 79.93653384                                      | 609.0063782                          | 6389.849442                             | -81.37299194                                |
| 4.203977759                            | 119.1187277                                      | 913.0430908                          | 14189.27129                             | -135.6363342                                |
| 3.139068678                            | 62.16154837                                      | 621.6009444                          | 3864.058096                             | -40.48335609                                |
| 4.192697517                            | 121.9719631                                      | 919.0462341                          | 14877.15979                             | -165.8819855                                |
| 3.962812615                            | 104.1211767                                      | 796.7592468                          | 10841.21944                             | -56.90349159                                |
| 3.80038803                             | 97.56793732                                      | 828.4243469                          | 9519.502394                             | -55.98239975                                |
| 3.730559866                            | 94.57063923                                      | 828.9260559                          | 8943.605805                             | -68.04270325                                |
| 3.282777464                            | 72.9166524                                       | 723.7546082                          | 5316.838198                             | -35.0964939                                 |
| 4.202990292                            | 113.610545                                       | 834.7823486                          | 12907.35593                             | -85.16072159                                |
| 4.138331396                            | 115.4241114                                      | 963.7523193                          | 13322.7255                              | -132.2806793                                |
| 3.896743398                            | 100.4836579                                      | 701.3200684                          | 10096.96551                             | -70.9969574                                 |
| 4.116961618                            | 109.1319153                                      | 884.7007446                          | 11909.77493                             | -126.8495346                                |
| 4.045191372                            | 121.8403161                                      | 1008.268127                          | 14845.06264                             | -93.32289047                                |
| 3.963242412                            | 99.54865047                                      | 779.2620239                          | 9909.933811                             | -108.5863541                                |
| 3.883899008                            | 99.7432941                                       | 1001.128632                          | 12043.59061                             | -139.7340851                                |
| 3.531912065                            | 79.05661491                                      | 556.6216278                          | 6249.94836                              | -77.89482651                                |
| 3.612557324                            | 87.47351303                                      | 849.6660767                          | 7651.615482                             | -44.5945118                                 |

| log.sigma.2.0.mm.3D_firstorder_Kurtosis | log.sigma.2.0.mm.3D_firstorder_Mean | log.sigma.2.0.mm.3D_glrIm_ShortRunLowGrayLevelEmphasis | log.sigma.2.0.mm.3D_glrIm_GrayLevelVariance |
|-----------------------------------------|-------------------------------------|--------------------------------------------------------|---------------------------------------------|
| 4.490228351                             | 22.39972029                         | 0.002507057                                            | 35.89832796                                 |
| 6.650123788                             | 40.12192046                         | 0.005844971                                            | 12.93562618                                 |
| 4.737801558                             | 38.09112537                         | 0.0075848                                              | 13.99814859                                 |
| 4.531289039                             | 15.59849574                         | 0.004632466                                            | 25.89825625                                 |
| 5.051854462                             | 25.50744547                         | 0.004716401                                            | 19.21046473                                 |
| 4.471000172                             | 42.66697093                         | 0.004468202                                            | 26.71752754                                 |
| 4.936794133                             | 35.69027494                         | 0.002505852                                            | 17.21098772                                 |
| 5.69921942                              | 39.80850823                         | 0.003040785                                            | 17.84280203                                 |
| 4.802669419                             | 39.23440686                         | 0.003002641                                            | 20.54407546                                 |
| 4.822249609                             | 46.66846147                         | 0.004908449                                            | 19.81166858                                 |
| 4.402320525                             | 29.88491387                         | 0.006305205                                            | 12.79419928                                 |
| 6.474707788                             | 48.43616148                         | 0.003689808                                            | 24.3288904                                  |
| 8.617801698                             | 21.71483242                         | 0.003485346                                            | 14.22438456                                 |
| 6.857453932                             | 32.36017042                         | 0.00269021                                             | 26.92505851                                 |
| 5.301511303                             | 35.2010129                          | 0.004401935                                            | 28.04770515                                 |
| 6.012090068                             | 27.13785924                         | 0.002631288                                            | 17.57700731                                 |
| 3.351692351                             | 28.14784873                         | 0.004952944                                            | 18.77408578                                 |
| 6.250943603                             | 32.89931323                         | 0.00477705                                             | 12.31952426                                 |
| 5.298873945                             | 27.70575505                         | 0.004320648                                            | 10.4462321                                  |
| 5.15326595                              | 40.41978573                         | 0.003159916                                            | 21.42782496                                 |
| 5.87103921                              | 30.22750975                         | 0.003846447                                            | 11.1362109                                  |
| 4.592431149                             | 37.3176061                          | 0.005316495                                            | 12.61008561                                 |
| 6.164064443                             | 31.1466458                          | 0.003267543                                            | 16.41108056                                 |
| 4.375797885                             | 37.41176859                         | 0.004140137                                            | 14.97366067                                 |
| 7.844021854                             | 47.91528808                         | 0.003438952                                            | 20.81132152                                 |
| 4.219385185                             | 54.76261389                         | 0.003953953                                            | 28.90005435                                 |
| 4.103619866                             | 39.00203917                         | 0.003930017                                            | 25.69925335                                 |
| 6.391655764                             | 27.46528906                         | 0.003464667                                            | 18.20888504                                 |
| 3.676862922                             | 36.57063756                         | 0.00685526                                             | 13.10578374                                 |
| 6.789145365                             | 34.2484813                          | 0.003645783                                            | 12.91749256                                 |
| 7.230019648                             | 37.98015529                         | 0.002703071                                            | 18.96616988                                 |
| 6.021438164                             | 12.42005291                         | 0.004285712                                            | 15.14721159                                 |
| 4.343949205                             | 24.95266772                         | 0.003845355                                            | 25.35993666                                 |
| 5.664381044                             | 32.58740533                         | 0.003633997                                            | 23.70676107                                 |
| 4.449305294                             | 52.75409904                         | 0.002914466                                            | 22.29890164                                 |
| 5.691340154                             | 35.4017343                          | 0.003321294                                            | 15.53791908                                 |
| 8.565522212                             | 18.15734553                         | 0.001700741                                            | 19.64264712                                 |
| 7.41970211                              | 24.25156454                         | 0.001803645                                            | 19.97617217                                 |
| 6.823688204                             | 20.38230645                         | 0.003900022                                            | 12.08514058                                 |
| 3.307647055                             | 24.03324785                         | 0.00443422                                             | 19.65363927                                 |
| 5.098136359                             | 15.03238552                         | 0.005681702                                            | 16.25326429                                 |
| 2.996066351                             | 22.08506853                         | 0.005211158                                            | 27.12183299                                 |
| 4.826644063                             | 39.33224251                         | 0.003579266                                            | 20.16925907                                 |
| 5.335743307                             | 26.40755951                         | 0.003324286                                            | 25.93846973                                 |
| 6.437587052                             | 55.37280328                         | 0.00414861                                             | 19.58259369                                 |
| 4.447845802                             | 44.31183474                         | 0.004930068                                            | 19.81068297                                 |
| 5.268927132                             | 37.39289013                         | 0.003449049                                            | 19.4903881                                  |
| 6.542864642                             | 36.99960551                         | 0.005809046                                            | 11.5735135                                  |
| 4.17204887                              | 40.85875543                         | 0.007103156                                            | 24.67286745                                 |
| 4.342531815                             | 48.17767957                         | 0.005031731                                            | 15.22608284                                 |
| 5.539828275                             | 52.49656643                         | 0.002743095                                            | 25.29883805                                 |
| 3.785974889                             | 34.56789845                         | 0.003545005                                            | 26.50546638                                 |
| 4.246611568                             | 30.87021637                         | 0.00387876                                             | 17.25133025                                 |
| 4.585489439                             | 49.39509252                         | 0.005962963                                            | 15.228532                                   |
| 4.333458547                             | 44.67914584                         | 0.00329513                                             | 17.38749272                                 |
| 5.82102661                              | 30.9913853                          | 0.005748193                                            | 16.19749704                                 |
| 4.071626249                             | 40.34043647                         | 0.003249841                                            | 21.27671796                                 |
| 6.092593246                             | 17.66763424                         | 0.002812121                                            | 18.05806206                                 |
| 5.791410062                             | 23.6881088                          | 0.00346581                                             | 19.54050749                                 |
| 4.406481664                             | 19.22857704                         | 0.003261106                                            | 22.6121203                                  |
| 5.712930069                             | 34.32502715                         | 0.0044756                                              | 18.35208035                                 |
| 6.747056985                             | 39.19999926                         | 0.001967191                                            | 20.45643406                                 |
| 4.749355834                             | 45.46076946                         | 0.002377132                                            | 20.81554223                                 |
| 5.254335059                             | 27.41724923                         | 0.00271582                                             | 19.69058622                                 |
| 3.774092095                             | 39.41231623                         | 0.012496023                                            | 11.50693184                                 |
| 6.688783846                             | 23.89538385                         | 0.003199649                                            | 17.60052381                                 |
| 8.664103443                             | 13.2851845                          | 0.00355188                                             | 14.64956942                                 |
| 5.174605888                             | 22.46859986                         | 0.002331769                                            | 20.60939186                                 |
| 5.164328021                             | 35.47474013                         | 0.002724241                                            | 20.55261911                                 |
| 7.179436452                             | 29.75381162                         | 0.002947959                                            | 11.25936986                                 |
| 4.505348351                             | 24.86393954                         | 0.004661104                                            | 16.3331681                                  |
| 6.96017596                              | 43.49078182                         | 0.001873742                                            | 18.65548046                                 |
| 5.141781816                             | 35.36215754                         | 0.004636153                                            | 21.54101156                                 |
| 3.669614807                             | 15.1549013                          | 0.004167981                                            | 30.59748858                                 |
| 3.303230731                             | 23.20760762                         | 0.00575766                                             | 24.51990616                                 |
| 6.162259563                             | 24.35338323                         | 0.00568754                                             | 17.42438945                                 |
| 5.340967649                             | 38.77161517                         | 0.003920472                                            | 12.56665729                                 |
| 6.571582621                             | 30.55869838                         | 0.006346247                                            | 15.82899177                                 |
| 6.324619992                             | 29.68969221                         | 0.003093397                                            | 14.2159477                                  |
| 4.556764974                             | 14.61419447                         | 0.003349805                                            | 28.04713458                                 |
| 4.584956879                             | 24.28068787                         | 0.002496963                                            | 34.952918                                   |
| 4.687202534                             | 12.56121683                         | 0.00661322                                             | 23.9451279                                  |
| 5.725806064                             | 31.88618281                         | 0.002902448                                            | 17.95578167                                 |
| 3.710668928                             | 27.31428093                         | 0.00511266                                             | 10.80987091                                 |
| 4.153763778                             | 27.69493241                         | 0.004932662                                            | 23.89526293                                 |
| 8.098102192                             | 21.29089376                         | 0.004279181                                            | 7.106564173                                 |
| 3.964668483                             | 11.84574533                         | 0.004811529                                            | 25.19387285                                 |
| 5.10026134                              | 51.91034436                         | 0.003813384                                            | 18.61943814                                 |
| 7.062130953                             | 38.51998945                         | 0.004342304                                            | 16.34253607                                 |
| 7.497748558                             | 31.23204436                         | 0.002913427                                            | 15.65510448                                 |
| 5.785530647                             | 33.58073481                         | 0.003609035                                            | 9.57883022                                  |
| 3.720342487                             | 51.10913297                         | 0.003969364                                            | 21.27517462                                 |
| 4.421042639                             | 22.00682164                         | 0.004109623                                            | 22.28649376                                 |
| 5.225226462                             | 38.53374784                         | 0.005573562                                            | 17.2781516                                  |
| 3.864877223                             | 20.29169961                         | 0.003336718                                            | 19.82493172                                 |
| 6.750639946                             | 33.73611791                         | 0.002455923                                            | 25.9340582                                  |
| 4.200653607                             | 22.1938162                          | 0.006324371                                            | 16.74092807                                 |
| 6.638043608                             | 7.308020284                         | 0.002779563                                            | 20.72726315                                 |
| 5.897419481                             | 14.8019467                          | 0.007729901                                            | 10.83540252                                 |
| 5.984714313                             | 37.57010736                         | 0.00299515                                             | 13.67095101                                 |



| log.sigma.2.0.mm.3D_glrIm_LowGrayLevelRunEmphasis | log.sigma.2.0.mm.3D_glrIm_GrayLevelNonUniformityNormalized | log.sigma.2.0.mm.3D_glrIm_RunVariance | log.sigma.2.0.mm.3D_glrIm_GrayLevelNonUniformity |
|---------------------------------------------------|------------------------------------------------------------|---------------------------------------|--------------------------------------------------|
| 0.002576827                                       | 0.06004414                                                 | 0.077511081                           | 119.4178763                                      |
| 0.006158567                                       | 0.111790207                                                | 0.161964365                           | 92.6639935                                       |
| 0.008021131                                       | 0.095042876                                                | 0.211487629                           | 128.8207442                                      |
| 0.004778618                                       | 0.069922697                                                | 0.114311167                           | 62.36623922                                      |
| 0.004913614                                       | 0.081887011                                                | 0.117666064                           | 176.866709                                       |
| 0.004584039                                       | 0.070304531                                                | 0.078654442                           | 43.39473636                                      |
| 0.002661386                                       | 0.081403939                                                | 0.140784608                           | 415.3034569                                      |
| 0.003231408                                       | 0.093080664                                                | 0.154802047                           | 423.381065                                       |
| 0.003145004                                       | 0.07276642                                                 | 0.105005173                           | 303.6404441                                      |
| 0.005069551                                       | 0.077894751                                                | 0.091959111                           | 77.08914239                                      |
| 0.006581954                                       | 0.088626387                                                | 0.102839632                           | 122.6064732                                      |
| 0.003815879                                       | 0.075104297                                                | 0.098286818                           | 159.5542191                                      |
| 0.003767911                                       | 0.132224612                                                | 0.265425514                           | 208.3957663                                      |
| 0.002777075                                       | 0.074122414                                                | 0.108650227                           | 116.3535953                                      |
| 0.004545464                                       | 0.072219329                                                | 0.095191211                           | 132.3941028                                      |
| 0.002796867                                       | 0.091329082                                                | 0.155400333                           | 355.9363157                                      |
| 0.005127517                                       | 0.069582203                                                | 0.072459041                           | 77.84484327                                      |
| 0.005102108                                       | 0.117677999                                                | 0.184104227                           | 126.4939091                                      |
| 0.004555039                                       | 0.099700912                                                | 0.123384509                           | 117.0116362                                      |
| 0.003292221                                       | 0.076517019                                                | 0.103410701                           | 365.3509926                                      |
| 0.004190715                                       | 0.113874159                                                | 0.232406898                           | 295.7240642                                      |
| 0.005520494                                       | 0.089550705                                                | 0.091895795                           | 89.24375039                                      |
| 0.003402469                                       | 0.088111817                                                | 0.113920602                           | 81.99517367                                      |
| 0.00435961                                        | 0.082043253                                                | 0.11357237                            | 198.0627605                                      |
| 0.003562074                                       | 0.087352577                                                | 0.12309186                            | 100.6515157                                      |
| 0.004090937                                       | 0.060957881                                                | 0.082850564                           | 134.6900311                                      |
| 0.004096866                                       | 0.066653432                                                | 0.097883443                           | 198.5318388                                      |
| 0.003614209                                       | 0.086508261                                                | 0.110536384                           | 218.1190019                                      |
| 0.007061631                                       | 0.083689044                                                | 0.07015126                            | 35.04816373                                      |
| 0.003815172                                       | 0.103622328                                                | 0.126767607                           | 192.0498964                                      |
| 0.002848569                                       | 0.089223719                                                | 0.159383424                           | 378.3827731                                      |
| 0.004519204                                       | 0.104550458                                                | 0.153146171                           | 192.1295799                                      |
| 0.004017954                                       | 0.066913706                                                | 0.115205423                           | 197.4041912                                      |
| 0.003811487                                       | 0.075455053                                                | 0.135862824                           | 159.7121118                                      |
| 0.003050116                                       | 0.069193471                                                | 0.100380059                           | 280.6887414                                      |
| 0.00354977                                        | 0.09660229                                                 | 0.16798582                            | 256.46438                                        |
| 0.00180898                                        | 0.1007947                                                  | 0.161011784                           | 331.9793609                                      |
| 0.001972126                                       | 0.097636944                                                | 0.295452465                           | 423.6320906                                      |
| 0.004046865                                       | 0.096062142                                                | 0.097842389                           | 108.5296147                                      |
| 0.00463985                                        | 0.066049114                                                | 0.089233232                           | 445.5605429                                      |
| 0.005981259                                       | 0.094826674                                                | 0.14286701                            | 219.9472152                                      |
| 0.005372355                                       | 0.054618874                                                | 0.05784375                            | 200.2612981                                      |
| 0.003741603                                       | 0.074096364                                                | 0.100522549                           | 249.0357693                                      |
| 0.003428251                                       | 0.072540795                                                | 0.088632009                           | 167.430734                                       |
| 0.004293656                                       | 0.082184698                                                | 0.115401442                           | 95.77859065                                      |
| 0.005131839                                       | 0.074358035                                                | 0.105292326                           | 187.2975569                                      |
| 0.003613406                                       | 0.079928846                                                | 0.117141109                           | 332.1176868                                      |
| 0.006067036                                       | 0.110138774                                                | 0.128265906                           | 86.43226913                                      |
| 0.007261144                                       | 0.070629021                                                | 0.076971781                           | 56.38170562                                      |
| 0.005310992                                       | 0.093129572                                                | 0.147434134                           | 112.6171938                                      |
| 0.002836284                                       | 0.068982303                                                | 0.087535705                           | 164.649947                                       |
| 0.003654455                                       | 0.059966769                                                | 0.061696871                           | 191.2154467                                      |
| 0.004043374                                       | 0.078104117                                                | 0.090070243                           | 326.3946208                                      |
| 0.006240382                                       | 0.084534024                                                | 0.112770138                           | 85.07513366                                      |
| 0.003432035                                       | 0.077084957                                                | 0.100022132                           | 94.33758694                                      |
| 0.005952706                                       | 0.088514242                                                | 0.108546731                           | 157.6040875                                      |
| 0.003384841                                       | 0.068784687                                                | 0.0888753                             | 258.0319884                                      |
| 0.002961937                                       | 0.089375305                                                | 0.128284535                           | 279.0765809                                      |
| 0.003594024                                       | 0.082315611                                                | 0.094873594                           | 125.085662                                       |
| 0.003419356                                       | 0.06732816                                                 | 0.123782903                           | 560.6332455                                      |
| 0.004735982                                       | 0.097356528                                                | 0.174054368                           | 151.1984059                                      |
| 0.002054544                                       | 0.08032835                                                 | 0.113222099                           | 196.1366561                                      |
| 0.002501255                                       | 0.07534078                                                 | 0.117098963                           | 397.8694801                                      |
| 0.002845631                                       | 0.078902714                                                | 0.110084509                           | 550.4307349                                      |
| 0.013058965                                       | 0.093556824                                                | 0.111669358                           | 67.3754035                                       |
| 0.003378831                                       | 0.09473944                                                 | 0.153699761                           | 326.4100554                                      |
| 0.003722442                                       | 0.108339223                                                | 0.147149601                           | 125.9104403                                      |
| 0.002456916                                       | 0.079657723                                                | 0.120858414                           | 453.0399479                                      |
| 0.002828893                                       | 0.074412258                                                | 0.090407339                           | 404.0565422                                      |
| 0.003156819                                       | 0.109682653                                                | 0.162501157                           | 281.0130862                                      |
| 0.004877098                                       | 0.08274203                                                 | 0.121200666                           | 97.43520813                                      |
| 0.001990165                                       | 0.090713582                                                | 0.151416948                           | 347.8754195                                      |
| 0.004863906                                       | 0.077950392                                                | 0.131020105                           | 160.5392442                                      |
| 0.004286255                                       | 0.059239111                                                | 0.079077198                           | 125.0574141                                      |
| 0.005946418                                       | 0.059255885                                                | 0.074436351                           | 173.9104442                                      |
| 0.005874432                                       | 0.091005856                                                | 0.107422255                           | 111.6902237                                      |
| 0.004155273                                       | 0.09809774                                                 | 0.125269143                           | 212.2832683                                      |
| 0.006576322                                       | 0.098789159                                                | 0.13474871                            | 84.8750705                                       |
| 0.003229015                                       | 0.091939774                                                | 0.103314106                           | 143.7285511                                      |
| 0.003462144                                       | 0.06099524                                                 | 0.077732209                           | 133.3363295                                      |
| 0.002565952                                       | 0.060964838                                                | 0.078365273                           | 113.6283427                                      |
| 0.006815529                                       | 0.075446224                                                | 0.117294884                           | 123.4657374                                      |
| 0.003085176                                       | 0.086594867                                                | 0.165695707                           | 251.9487867                                      |
| 0.005427333                                       | 0.092965529                                                | 0.122901958                           | 258.399926                                       |
| 0.005098383                                       | 0.067822616                                                | 0.091824841                           | 153.0002481                                      |
| 0.004700062                                       | 0.144630118                                                | 0.300435085                           | 184.2339342                                      |
| 0.005018393                                       | 0.068246685                                                | 0.117864812                           | 148.4009104                                      |
| 0.004022027                                       | 0.080366588                                                | 0.133038669                           | 198.6595007                                      |
| 0.00450564                                        | 0.091405756                                                | 0.121408161                           | 121.431992                                       |
| 0.003076613                                       | 0.099397621                                                | 0.150835825                           | 178.9476028                                      |
| 0.003938869                                       | 0.134677053                                                | 0.229980682                           | 149.4149472                                      |
| 0.004099281                                       | 0.064686959                                                | 0.071023632                           | 144.9824672                                      |
| 0.004275705                                       | 0.072021227                                                | 0.090842574                           | 345.634396                                       |
| 0.00582212                                        | 0.085036392                                                | 0.130494964                           | 253.4634774                                      |
| 0.003473896                                       | 0.069937727                                                | 0.081899001                           | 283.3517937                                      |
| 0.002579643                                       | 0.081903635                                                | 0.161104437                           | 250.440997                                       |
| 0.006580318                                       | 0.079918943                                                | 0.103496561                           | 206.519124                                       |
| 0.002879548                                       | 0.091945362                                                | 0.120401499                           | 87.49706969                                      |
| 0.008075225                                       | 0.1077653                                                  | 0.13788153                            | 80.43180441                                      |
| 0.003245791                                       | 0.109151807                                                | 0.19290617                            | 549.3131708                                      |

| log.sigma.2.0.mm.3D_glrIm_LongRunEmphasis | log.sigma.2.0.mm.3D_glrIm_ShortRunHighGrayLevelEmphasis | log.sigma.2.0.mm.3D_glrIm_RunLengthNonUniformity | log.sigma.2.0.mm.3D_glrIm_ShortRunEmphasis |
|-------------------------------------------|---------------------------------------------------------|--------------------------------------------------|--------------------------------------------|
| 1.217098238                               | 693.8866694                                             | 1761.512983                                      | 0.953514367                                |
| 1.440066359                               | 279.4957248                                             | 665.1144666                                      | 0.914937114                                |
| 1.505215096                               | 223.067011                                              | 1092.335975                                      | 0.916304446                                |
| 1.317861504                               | 433.379391                                              | 753.184495                                       | 0.934897602                                |
| 1.321775975                               | 370.8778321                                             | 1825.556897                                      | 0.935361266                                |
| 1.223892195                               | 452.89402                                               | 543.9471349                                      | 0.951426582                                |
| 1.3706127                                 | 464.1580715                                             | 4250.994968                                      | 0.929600042                                |
| 1.41914937                                | 425.7018249                                             | 3685.609245                                      | 0.918936669                                |
| 1.293882754                               | 473.5810976                                             | 3556.498768                                      | 0.938611161                                |
| 1.267397567                               | 369.5429668                                             | 849.1697551                                      | 0.941332905                                |
| 1.29351421                                | 242.1911435                                             | 1176.612905                                      | 0.937692974                                |
| 1.277309315                               | 537.6923633                                             | 1822.888818                                      | 0.941304046                                |
| 1.676990132                               | 380.7868787                                             | 1173.82627                                       | 0.885820756                                |
| 1.308039243                               | 745.2963198                                             | 1326.283593                                      | 0.935257381                                |
| 1.269599676                               | 476.1337836                                             | 1580.046183                                      | 0.942746189                                |
| 1.419930239                               | 484.7490655                                             | 3160.363475                                      | 0.919159866                                |
| 1.212696965                               | 313.8929227                                             | 986.8688331                                      | 0.952058391                                |
| 1.504202821                               | 297.948983                                              | 837.4034119                                      | 0.903451323                                |
| 1.348617293                               | 294.9456128                                             | 971.2699324                                      | 0.927338492                                |
| 1.290592542                               | 478.7904858                                             | 4073.672841                                      | 0.939092197                                |
| 1.594907178                               | 292.9029774                                             | 1992.04894                                       | 0.89709105                                 |
| 1.265440152                               | 282.6688018                                             | 857.1921104                                      | 0.942330807                                |
| 1.326847191                               | 494.6251467                                             | 776.8294895                                      | 0.930719309                                |
| 1.31856062                                | 317.139868                                              | 2032.731489                                      | 0.933864292                                |
| 1.347578672                               | 573.2516054                                             | 956.1070158                                      | 0.928069973                                |
| 1.233781924                               | 434.0784472                                             | 1939.081991                                      | 0.949895071                                |
| 1.277996608                               | 441.0474426                                             | 2553.36959                                       | 0.940881873                                |
| 1.312397354                               | 451.0094735                                             | 2125.974341                                      | 0.934565338                                |
| 1.210589565                               | 254.8679575                                             | 368.6592389                                      | 0.951248855                                |
| 1.357715694                               | 412.9145437                                             | 1530.00338                                       | 0.92624747                                 |
| 1.421883745                               | 549.2720714                                             | 3451.170413                                      | 0.92046266                                 |
| 1.424158482                               | 340.9053759                                             | 1478.32401                                       | 0.916028834                                |
| 1.316319028                               | 416.2896999                                             | 2497.787034                                      | 0.935857723                                |
| 1.371367943                               | 502.3591037                                             | 1748.395707                                      | 0.926381028                                |
| 1.280647168                               | 460.6341504                                             | 3479.378679                                      | 0.941140004                                |
| 1.447400447                               | 379.2386281                                             | 2133.009512                                      | 0.915580131                                |
| 1.441696405                               | 744.2737433                                             | 2636.351665                                      | 0.914111831                                |
| 1.720473104                               | 644.1652496                                             | 3235.123451                                      | 0.886123277                                |
| 1.28498697                                | 394.767404                                              | 960.5042303                                      | 0.937691867                                |
| 1.252155538                               | 306.9891076                                             | 5857.210943                                      | 0.945864288                                |
| 1.397974068                               | 281.9465172                                             | 1886.1787                                        | 0.920145719                                |
| 1.1707909                                 | 316.2003242                                             | 3306.508398                                      | 0.960664514                                |
| 1.284244662                               | 435.2710584                                             | 2875.582275                                      | 0.940008636                                |
| 1.252134649                               | 545.5659783                                             | 2003.542211                                      | 0.945793305                                |
| 1.320453129                               | 458.8556824                                             | 983.0919794                                      | 0.93438307                                 |
| 1.295241686                               | 331.8688594                                             | 2147.116663                                      | 0.93853746                                 |
| 1.324571504                               | 429.5280468                                             | 3494.369727                                      | 0.933488761                                |
| 1.363979543                               | 275.3384303                                             | 646.2330922                                      | 0.924907917                                |
| 1.216083285                               | 334.9616032                                             | 707.9958368                                      | 0.953743167                                |
| 1.400469081                               | 296.4578449                                             | 986.7617875                                      | 0.921495928                                |
| 1.246710707                               | 596.2034489                                             | 2078.822613                                      | 0.947213649                                |
| 1.179816894                               | 443.0383215                                             | 2865.067113                                      | 0.959249                                   |
| 1.256749288                               | 345.8924076                                             | 3614.284182                                      | 0.944543644                                |
| 1.319381776                               | 267.9341302                                             | 846.5334557                                      | 0.933300415                                |
| 1.283303193                               | 440.6704422                                             | 1046.882556                                      | 0.939930691                                |
| 1.309824923                               | 341.1761252                                             | 1500.318531                                      | 0.934288747                                |
| 1.253620274                               | 439.8922728                                             | 3253.482345                                      | 0.945327179                                |
| 1.357479817                               | 471.721839                                              | 2585.356084                                      | 0.927305813                                |
| 1.27237526                                | 448.2823374                                             | 1302.560816                                      | 0.941057549                                |
| 1.328027735                               | 445.383737                                              | 7052.438909                                      | 0.936025811                                |
| 1.471583779                               | 340.1889098                                             | 1229.307655                                      | 0.909811839                                |
| 1.31083793                                | 702.9817374                                             | 2068.87837                                       | 0.936487581                                |
| 1.320695976                               | 527.7536351                                             | 4458.86212                                       | 0.93509359                                 |
| 1.306225383                               | 495.5444958                                             | 5917.622017                                      | 0.936729528                                |
| 1.316996025                               | 147.0785437                                             | 606.2650154                                      | 0.933730581                                |
| 1.412604132                               | 439.3756865                                             | 2800.594164                                      | 0.920356622                                |
| 1.409568266                               | 456.5026329                                             | 940.7546433                                      | 0.918414184                                |
| 1.331037039                               | 527.3268408                                             | 4777.465183                                      | 0.932938885                                |
| 1.255719032                               | 511.9596873                                             | 4710.989038                                      | 0.945453286                                |
| 1.445206808                               | 401.2106078                                             | 2045.647319                                      | 0.913125008                                |
| 1.341462133                               | 330.244912                                              | 980.4765294                                      | 0.929420353                                |
| 1.406378347                               | 652.6623077                                             | 3130.419281                                      | 0.921752138                                |
| 1.358288295                               | 387.9038525                                             | 1711.153244                                      | 0.928619001                                |
| 1.225403534                               | 448.7564226                                             | 1856.457964                                      | 0.950875431                                |
| 1.213770716                               | 311.9057859                                             | 2595.868055                                      | 0.952953844                                |
| 1.305929478                               | 368.0295098                                             | 1037.436023                                      | 0.935268101                                |
| 1.353561504                               | 314.1691786                                             | 1790.04016                                       | 0.92693505                                 |
| 1.382290833                               | 336.2497069                                             | 699.9120496                                      | 0.921014847                                |
| 1.297345866                               | 450.9272838                                             | 1323.91387                                       | 0.93621372                                 |
| 1.224068307                               | 532.0687312                                             | 1922.076088                                      | 0.950735501                                |
| 1.218386177                               | 697.49235                                               | 1651.028001                                      | 0.953553219                                |
| 1.328610104                               | 355.440989                                              | 1371.679519                                      | 0.932103148                                |
| 1.433881967                               | 454.3514561                                             | 2366.044367                                      | 0.91992205                                 |
| 1.347807424                               | 234.2159972                                             | 2305.090615                                      | 0.927860258                                |
| 1.263530642                               | 383.0750934                                             | 1946.28489                                       | 0.943133846                                |
| 1.765728547                               | 267.9761309                                             | 922.7119555                                      | 0.874354465                                |
| 1.324902934                               | 357.2991542                                             | 1837.070073                                      | 0.934536824                                |
| 1.36532352                                | 410.4567107                                             | 2043.152084                                      | 0.926754943                                |
| 1.340485304                               | 426.1299122                                             | 1109.598115                                      | 0.930326625                                |
| 1.419939725                               | 486.1592858                                             | 1449.402852                                      | 0.916241422                                |
| 1.617660622                               | 327.1779253                                             | 830.6641583                                      | 0.888324961                                |
| 1.20187337                                | 385.4943461                                             | 1997.61312                                       | 0.955835652                                |
| 1.258607165                               | 373.3934031                                             | 4150.799604                                      | 0.944394121                                |
| 1.358871906                               | 316.6057109                                             | 2472.901665                                      | 0.928033469                                |
| 1.236761509                               | 407.5516717                                             | 3535.075603                                      | 0.947889675                                |
| 1.417082485                               | 640.2611354                                             | 2502.97594                                       | 0.922693663                                |
| 1.294087421                               | 266.2966763                                             | 2196.9116                                        | 0.937632145                                |
| 1.333528189                               | 632.8719781                                             | 797.2508264                                      | 0.932033371                                |
| 1.390750182                               | 216.0003546                                             | 606.5277299                                      | 0.919891292                                |
| 1.51364654                                | 377.2699651                                             | 3935.400412                                      | 0.905047466                                |

| log.sigma.2.0.mm.3D_glrIm_LongRunHighGrayLevelEmphasis | log.sigma.2.0.mm.3D_glrIm_RunPercentage | log.sigma.2.0.mm.3D_glrIm_LongRunLowGrayLevelEmphasis | log.sigma.2.0.mm.3D_glrIm_RunEntropy |
|--------------------------------------------------------|-----------------------------------------|-------------------------------------------------------|--------------------------------------|
| 894.1761024                                            | 0.937142029                             | 0.002904136                                           | 4.780183012                          |
| 435.0574851                                            | 0.885972851                             | 0.007767167                                           | 4.175684953                          |
| 350.8613604                                            | 0.88225855                              | 0.010616533                                           | 4.345486121                          |
| 628.5120012                                            | 0.912526573                             | 0.0054802                                             | 4.627986959                          |
| 530.8413263                                            | 0.911902287                             | 0.005860203                                           | 4.468150925                          |
| 579.4343949                                            | 0.935081585                             | 0.005115725                                           | 4.591005988                          |
| 676.2628076                                            | 0.902576807                             | 0.003478351                                           | 4.4895147                            |
| 651.0510966                                            | 0.89014216                              | 0.004213726                                           | 4.446337627                          |
| 657.2749006                                            | 0.917780636                             | 0.00381264                                            | 4.558218627                          |
| 501.1440936                                            | 0.923005166                             | 0.005801111                                           | 4.441858088                          |
| 335.8089142                                            | 0.917261783                             | 0.007863003                                           | 4.230913618                          |
| 731.690077                                             | 0.921541799                             | 0.004396066                                           | 4.550860423                          |
| 711.5408471                                            | 0.843434552                             | 0.005439029                                           | 4.221107434                          |
| 1045.112633                                            | 0.913892747                             | 0.003187684                                           | 4.649301589                          |
| 646.3428202                                            | 0.923736042                             | 0.00520213                                            | 4.618785021                          |
| 746.1483427                                            | 0.890240473                             | 0.003649451                                           | 4.456674664                          |
| 398.7167391                                            | 0.936928231                             | 0.005894417                                           | 4.449040524                          |
| 492.1674408                                            | 0.871482937                             | 0.006790554                                           | 4.187755103                          |
| 433.3581983                                            | 0.904112836                             | 0.005674278                                           | 4.129396404                          |
| 656.1794099                                            | 0.918297898                             | 0.003918336                                           | 4.556972292                          |
| 511.0442201                                            | 0.858363858                             | 0.006176495                                           | 4.245703461                          |
| 382.0086034                                            | 0.92350467                              | 0.006452916                                           | 4.193520738                          |
| 708.727192                                             | 0.908653846                             | 0.004038683                                           | 4.357505268                          |
| 443.2781007                                            | 0.911830519                             | 0.005413848                                           | 4.384580211                          |
| 825.7149621                                            | 0.904828086                             | 0.004157947                                           | 4.449717221                          |
| 560.1113292                                            | 0.932655778                             | 0.004726866                                           | 4.749993512                          |
| 596.8494731                                            | 0.921149682                             | 0.004859387                                           | 4.695928956                          |
| 634.9961772                                            | 0.912744388                             | 0.004321614                                           | 4.401510679                          |
| 323.7390369                                            | 0.936843917                             | 0.007951498                                           | 4.165124578                          |
| 609.9864781                                            | 0.902142162                             | 0.004633679                                           | 4.19183701                           |
| 842.122262                                             | 0.890969056                             | 0.003614796                                           | 4.485538539                          |
| 536.6332227                                            | 0.888017251                             | 0.005689706                                           | 4.278233422                          |
| 584.6988108                                            | 0.913452605                             | 0.0048523                                             | 4.719585889                          |
| 742.6394791                                            | 0.900523732                             | 0.004671281                                           | 4.629110664                          |
| 623.9899487                                            | 0.920998393                             | 0.003692723                                           | 4.616256124                          |
| 589.7076908                                            | 0.884961654                             | 0.004751097                                           | 4.379310041                          |
| 1175.998108                                            | 0.884729084                             | 0.002362731                                           | 4.425625849                          |
| 1219.530087                                            | 0.83961069                              | 0.003040312                                           | 4.60677355                           |
| 549.4481989                                            | 0.918449031                             | 0.004715262                                           | 4.101793614                          |
| 404.9630324                                            | 0.927870067                             | 0.005587977                                           | 4.57038917                           |
| 431.404752                                             | 0.893778542                             | 0.007441335                                           | 4.369677332                          |
| 384.806481                                             | 0.948141075                             | 0.006064947                                           | 4.712668329                          |
| 594.9602087                                            | 0.919897239                             | 0.004490503                                           | 4.534360646                          |
| 728.3904931                                            | 0.92755998                              | 0.003904917                                           | 4.59356971                           |
| 645.477856                                             | 0.911761165                             | 0.005013248                                           | 4.435862685                          |
| 454.912791                                             | 0.917472327                             | 0.006092291                                           | 4.535164143                          |
| 606.4469304                                            | 0.91064985                              | 0.004405922                                           | 4.516389175                          |
| 410.1116892                                            | 0.900821337                             | 0.007312356                                           | 4.085506896                          |
| 430.2889013                                            | 0.93781072                              | 0.007978049                                           | 4.523292085                          |
| 440.9432484                                            | 0.894287665                             | 0.006729634                                           | 4.339753892                          |
| 783.8923929                                            | 0.929065485                             | 0.003268308                                           | 4.617840423                          |
| 544.7983684                                            | 0.94591881                              | 0.004130207                                           | 4.673671967                          |
| 463.1858107                                            | 0.926128614                             | 0.004799299                                           | 4.424768854                          |
| 374.8719868                                            | 0.911371237                             | 0.007559929                                           | 4.361539369                          |
| 603.0417657                                            | 0.920069404                             | 0.004073337                                           | 4.429787743                          |
| 481.1489303                                            | 0.913017751                             | 0.006923895                                           | 4.337894583                          |
| 584.9841985                                            | 0.927241609                             | 0.004001857                                           | 4.565204599                          |
| 693.4522157                                            | 0.902789518                             | 0.003694617                                           | 4.422634282                          |
| 612.1158847                                            | 0.922003361                             | 0.004182115                                           | 4.423059972                          |
| 624.9742512                                            | 0.911954296                             | 0.004224556                                           | 4.665975483                          |
| 545.4158038                                            | 0.878996428                             | 0.006098832                                           | 4.456754559                          |
| 985.4013751                                            | 0.91428983                              | 0.002483299                                           | 4.48009353                           |
| 742.2206164                                            | 0.912034761                             | 0.003112925                                           | 4.563106878                          |
| 693.275342                                             | 0.91503446                              | 0.003466241                                           | 4.514567205                          |
| 205.9940726                                            | 0.911587147                             | 0.015708614                                           | 4.160016575                          |
| 671.2356482                                            | 0.891925268                             | 0.004313521                                           | 4.411346153                          |
| 705.0371163                                            | 0.890986314                             | 0.004572697                                           | 4.213921493                          |
| 756.6008865                                            | 0.909784615                             | 0.003072283                                           | 4.551772927                          |
| 687.8701026                                            | 0.926977581                             | 0.0033167                                             | 4.510062216                          |
| 632.4125001                                            | 0.883872166                             | 0.004225623                                           | 4.169935468                          |
| 480.7486446                                            | 0.906259253                             | 0.005908554                                           | 4.415328639                          |
| 988.7834151                                            | 0.893580778                             | 0.002595404                                           | 4.457381873                          |
| 564.5126497                                            | 0.903500186                             | 0.005961058                                           | 4.578226745                          |
| 586.3537639                                            | 0.934416181                             | 0.004820872                                           | 4.751577554                          |
| 397.3790782                                            | 0.937326487                             | 0.006786168                                           | 4.675307675                          |
| 518.8942199                                            | 0.914364324                             | 0.006758566                                           | 4.318055481                          |
| 454.0411402                                            | 0.903075639                             | 0.005290347                                           | 4.236914566                          |
| 505.1346466                                            | 0.896418821                             | 0.007679492                                           | 4.306277834                          |
| 630.099998                                             | 0.915731603                             | 0.003858986                                           | 4.260013666                          |
| 687.1831304                                            | 0.934488769                             | 0.003959917                                           | 4.71148731                           |
| 898.2891211                                            | 0.936960978                             | 0.002890336                                           | 4.764683948                          |
| 511.6301319                                            | 0.909394108                             | 0.007773954                                           | 4.620149823                          |
| 697.046455                                             | 0.889521613                             | 0.004071524                                           | 4.500654052                          |
| 343.3389059                                            | 0.904428146                             | 0.006924621                                           | 4.196411393                          |
| 516.2420016                                            | 0.924748478                             | 0.005854415                                           | 4.627831468                          |
| 543.2790211                                            | 0.830086363                             | 0.007255594                                           | 3.98568643                           |
| 510.8328411                                            | 0.911498145                             | 0.006017542                                           | 4.679161663                          |
| 597.5722647                                            | 0.90139146                              | 0.005037563                                           | 4.499552338                          |
| 613.3064513                                            | 0.907051282                             | 0.005300224                                           | 4.307547181                          |
| 756.6276105                                            | 0.888774929                             | 0.003892382                                           | 4.32978571                           |
| 579.7480697                                            | 0.850165172                             | 0.005770898                                           | 4.058975744                          |
| 482.8535726                                            | 0.940870632                             | 0.004695651                                           | 4.544402256                          |
| 501.1778336                                            | 0.92586711                              | 0.00504482                                            | 4.565099586                          |
| 464.4695474                                            | 0.903053613                             | 0.007046735                                           | 4.425238574                          |
| 535.7952997                                            | 0.930907098                             | 0.004090074                                           | 4.51586219                           |
| 975.2016011                                            | 0.893202356                             | 0.003253694                                           | 4.634479465                          |
| 368.6887185                                            | 0.917178668                             | 0.007767858                                           | 4.426675771                          |
| 917.470864                                             | 0.908676806                             | 0.003368558                                           | 4.387653344                          |
| 334.2213171                                            | 0.89466888                              | 0.009738222                                           | 4.083361764                          |
| 617.489157                                             | 0.871226453                             | 0.004601724                                           | 4.307346272                          |

| log.sigma.2.0.mm.3D_gIrlm_HighGrayLevelRunEmphasis | log.sigma.2.0.mm.3D_gIrlm_RunLengthNonUniformityNormalized | log.sigma.2.0.mm.3D_gIrlm_GrayLevelVariance |
|----------------------------------------------------|------------------------------------------------------------|---------------------------------------------|
| 729.3724601                                        | 0.885376125                                                | 51.01937838                                 |
| 304.9365069                                        | 0.801610683                                                | 29.37625695                                 |
| 241.5439769                                        | 0.805144906                                                | 27.55641563                                 |
| 466.5297391                                        | 0.843869619                                                | 39.53062041                                 |
| 397.6874786                                        | 0.844853903                                                | 32.06824668                                 |
| 475.5441636                                        | 0.880705781                                                | 41.75952103                                 |
| 498.2926111                                        | 0.832687508                                                | 30.04630136                                 |
| 462.4448472                                        | 0.809808842                                                | 35.76042566                                 |
| 505.3764457                                        | 0.851755938                                                | 33.88284651                                 |
| 393.361328                                         | 0.857515207                                                | 32.92836922                                 |
| 258.5558629                                        | 0.849791591                                                | 21.2166316                                  |
| 571.6129328                                        | 0.857600362                                                | 42.79747417                                 |
| 428.8328847                                        | 0.744051118                                                | 35.70137576                                 |
| 797.427292                                         | 0.844419262                                                | 50.21807074                                 |
| 506.0287163                                        | 0.861163724                                                | 45.68176458                                 |
| 527.0573249                                        | 0.810345031                                                | 32.90297593                                 |
| 329.5196934                                        | 0.88167068                                                 | 27.06079256                                 |
| 329.3784726                                        | 0.778186812                                                | 26.75408395                                 |
| 318.7910126                                        | 0.826968031                                                | 19.29385622                                 |
| 509.6036879                                        | 0.852743759                                                | 37.21584774                                 |
| 325.2482327                                        | 0.766071918                                                | 24.19442859                                 |
| 300.3916558                                        | 0.859784496                                                | 22.07853167                                 |
| 532.1534093                                        | 0.834236736                                                | 31.15835014                                 |
| 338.9349445                                        | 0.841363691                                                | 25.00423115                                 |
| 616.6934457                                        | 0.828973552                                                | 42.33999979                                 |
| 456.4194821                                        | 0.877078002                                                | 42.46544657                                 |
| 468.4317954                                        | 0.856733332                                                | 41.30410431                                 |
| 483.0044064                                        | 0.842731594                                                | 34.5693811                                  |
| 267.8252915                                        | 0.879784618                                                | 18.32274692                                 |
| 446.6585323                                        | 0.824883338                                                | 25.94623621                                 |
| 595.9928024                                        | 0.813200962                                                | 36.7372787                                  |
| 373.2889001                                        | 0.803643498                                                | 31.68312596                                 |
| 444.7267951                                        | 0.84592605                                                 | 40.30997855                                 |
| 542.2962416                                        | 0.825396126                                                | 40.93347166                                 |
| 489.0801592                                        | 0.857277626                                                | 35.76355121                                 |
| 412.8249894                                        | 0.802893063                                                | 31.54764563                                 |
| 814.5474454                                        | 0.799780629                                                | 43.59647373                                 |
| 723.4075006                                        | 0.745078749                                                | 43.59863238                                 |
| 422.4588236                                        | 0.84951283                                                 | 22.42516476                                 |
| 324.3524459                                        | 0.867731698                                                | 28.43762885                                 |
| 306.95629                                          | 0.812384426                                                | 30.23678327                                 |
| 329.0319538                                        | 0.901544664                                                | 34.33290759                                 |
| 463.0891054                                        | 0.854931391                                                | 32.48046219                                 |
| 577.9713587                                        | 0.867663277                                                | 43.353596                                   |
| 490.8006609                                        | 0.842838831                                                | 36.81089243                                 |
| 353.1457846                                        | 0.851789137                                                | 32.06503181                                 |
| 459.7020331                                        | 0.840525971                                                | 34.38020098                                 |
| 298.4314422                                        | 0.822387439                                                | 24.0629334                                  |
| 351.6560791                                        | 0.886223617                                                | 37.88454538                                 |
| 320.1217799                                        | 0.815188683                                                | 29.09943414                                 |
| 629.3678328                                        | 0.870704783                                                | 42.10548012                                 |
| 461.8144198                                        | 0.898265302                                                | 36.74659632                                 |
| 366.7417947                                        | 0.864594346                                                | 27.95361385                                 |
| 286.5603244                                        | 0.840347573                                                | 27.17522257                                 |
| 468.9944188                                        | 0.854719086                                                | 28.44075534                                 |
| 365.7297536                                        | 0.842050919                                                | 29.77197666                                 |
| 465.6113304                                        | 0.866722368                                                | 32.08151379                                 |
| 509.2545489                                        | 0.827323568                                                | 35.92193292                                 |
| 477.4253368                                        | 0.856791342                                                | 34.96282422                                 |
| 475.0195502                                        | 0.846463111                                                | 35.43848113                                 |
| 373.4715547                                        | 0.79091946                                                 | 36.38369053                                 |
| 751.2398449                                        | 0.847003386                                                | 35.57573051                                 |
| 564.0366326                                        | 0.844021204                                                | 34.46513259                                 |
| 529.2343292                                        | 0.847671608                                                | 35.06298905                                 |
| 157.2591444                                        | 0.8411354                                                  | 19.46239269                                 |
| 477.0411103                                        | 0.812471771                                                | 36.60509943                                 |
| 497.900325                                         | 0.808715836                                                | 33.45909949                                 |
| 566.0749916                                        | 0.839435799                                                | 35.60664658                                 |
| 542.9262214                                        | 0.867043332                                                | 32.31502145                                 |
| 439.1613018                                        | 0.797697177                                                | 24.72907029                                 |
| 355.9804725                                        | 0.831855821                                                | 26.7485849                                  |
| 707.2172137                                        | 0.815758399                                                | 39.00997422                                 |
| 417.3693572                                        | 0.830250579                                                | 38.18893995                                 |
| 473.319832                                         | 0.87905511                                                 | 43.3184                                     |
| 327.3330255                                        | 0.883989842                                                | 33.56929069                                 |
| 394.4038866                                        | 0.844501395                                                | 31.3784554                                  |
| 338.2016147                                        | 0.826455594                                                | 25.16333458                                 |
| 365.0675876                                        | 0.81389666                                                 | 35.00394267                                 |
| 482.6278727                                        | 0.846328152                                                | 25.93996318                                 |
| 559.9440263                                        | 0.878835967                                                | 40.9471749                                  |
| 732.8413482                                        | 0.885515593                                                | 50.72930975                                 |
| 382.2497825                                        | 0.83761796                                                 | 40.12841157                                 |
| 492.5956999                                        | 0.812423927                                                | 34.12337258                                 |
| 252.9271472                                        | 0.828466903                                                | 18.29015868                                 |
| 406.695474                                         | 0.861964655                                                | 36.11236164                                 |
| 306.9701504                                        | 0.722930753                                                | 16.68765817                                 |
| 383.0589615                                        | 0.843718016                                                | 37.43736624                                 |
| 441.9000236                                        | 0.826062807                                                | 32.595094                                   |
| 458.0770031                                        | 0.834234409                                                | 29.80007797                                 |
| 531.3090105                                        | 0.804222557                                                | 32.53328619                                 |
| 366.1930592                                        | 0.748303017                                                | 20.98830289                                 |
| 403.0802857                                        | 0.890758699                                                | 29.61532815                                 |
| 396.0760262                                        | 0.864461321                                                | 34.65766054                                 |
| 341.4131108                                        | 0.829008106                                                | 29.29170351                                 |
| 430.6411175                                        | 0.872172927                                                | 28.75803224                                 |
| 693.1702315                                        | 0.818040515                                                | 48.72272658                                 |
| 284.1987992                                        | 0.849562774                                                | 27.77469833                                 |
| 681.1056934                                        | 0.837335589                                                | 39.84261387                                 |
| 236.0644286                                        | 0.811657341                                                | 21.59464778                                 |
| 415.0191993                                        | 0.781365696                                                | 28.87445038                                 |

| log.sigma.2.0.mm.3D_glszm_SmallAreaHighGrayLevelEmphasis | log.sigma.2.0.mm.3D_glszm_GrayLevelNonUniformityNormalized | log.sigma.2.0.mm.3D_glszm_SizeZoneNonUniformityNormalized |
|----------------------------------------------------------|------------------------------------------------------------|-----------------------------------------------------------|
| 470.1894431                                              | 0.041720117                                                | 0.464446064                                               |
| 193.230426                                               | 0.062433024                                                | 0.418886981                                               |
| 166.4955367                                              | 0.056764871                                                | 0.393465524                                               |
| 259.919076                                               | 0.04757551                                                 | 0.439134694                                               |
| 239.3078747                                              | 0.052249318                                                | 0.436544675                                               |
| 336.9064614                                              | 0.046019768                                                | 0.48540995                                                |
| 330.5015018                                              | 0.052686392                                                | 0.423757144                                               |
| 303.4387098                                              | 0.050486034                                                | 0.45140222                                                |
| 317.3070513                                              | 0.049840365                                                | 0.439832036                                               |
| 244.057885                                               | 0.051700436                                                | 0.433169783                                               |
| 159.7269336                                              | 0.064617456                                                | 0.397936201                                               |
| 374.3880577                                              | 0.048396178                                                | 0.465358988                                               |
| 259.0999213                                              | 0.057667624                                                | 0.411689888                                               |
| 517.0605136                                              | 0.044657066                                                | 0.423357237                                               |
| 322.3008186                                              | 0.045721959                                                | 0.445615538                                               |
| 344.0827363                                              | 0.055181275                                                | 0.436138104                                               |
| 219.8728112                                              | 0.054175658                                                | 0.407730362                                               |
| 194.6718986                                              | 0.061640983                                                | 0.410708501                                               |
| 188.2717336                                              | 0.070149744                                                | 0.385053408                                               |
| 335.0391633                                              | 0.047734074                                                | 0.427640592                                               |
| 206.2674361                                              | 0.061561704                                                | 0.388151137                                               |
| 191.8497317                                              | 0.062041719                                                | 0.425605536                                               |
| 338.6406104                                              | 0.055101724                                                | 0.432699592                                               |
| 227.6618767                                              | 0.057023687                                                | 0.430172353                                               |
| 409.8725733                                              | 0.051317718                                                | 0.434368961                                               |
| 311.7749461                                              | 0.045187911                                                | 0.436367067                                               |
| 321.3647565                                              | 0.044543966                                                | 0.457459058                                               |
| 308.8417964                                              | 0.051249667                                                | 0.450229871                                               |
| 161.2638594                                              | 0.067142742                                                | 0.368573653                                               |
| 268.9606963                                              | 0.060337222                                                | 0.411266869                                               |
| 396.9514524                                              | 0.052503453                                                | 0.465068464                                               |
| 231.9603306                                              | 0.055138589                                                | 0.452609528                                               |
| 289.6269756                                              | 0.046180881                                                | 0.413046444                                               |
| 347.4056158                                              | 0.047492801                                                | 0.448257598                                               |
| 324.6908504                                              | 0.048410908                                                | 0.439565618                                               |
| 279.0903899                                              | 0.056158682                                                | 0.427002679                                               |
| 549.2196877                                              | 0.04957978                                                 | 0.470261281                                               |
| 494.720274                                               | 0.048745852                                                | 0.429371109                                               |
| 246.2147829                                              | 0.066709247                                                | 0.380148062                                               |
| 207.6051475                                              | 0.051821322                                                | 0.388147655                                               |
| 188.6059871                                              | 0.056203801                                                | 0.418203159                                               |
| 229.984314                                               | 0.047268041                                                | 0.445201934                                               |
| 285.8043199                                              | 0.050517054                                                | 0.400344703                                               |
| 370.3102701                                              | 0.046182                                                   | 0.43942                                                   |
| 312.2401652                                              | 0.053543724                                                | 0.432599457                                               |
| 241.1034621                                              | 0.050682088                                                | 0.448590193                                               |
| 298.5317301                                              | 0.051205513                                                | 0.420710953                                               |
| 169.9986385                                              | 0.063924014                                                | 0.373113455                                               |
| 233.830711                                               | 0.047401424                                                | 0.46862047                                                |
| 207.0283611                                              | 0.057022702                                                | 0.416177675                                               |
| 411.6090419                                              | 0.046710532                                                | 0.43460294                                                |
| 320.9233291                                              | 0.04731443                                                 | 0.443798404                                               |
| 239.08943                                                | 0.054687824                                                | 0.447258498                                               |
| 192.3509376                                              | 0.056625043                                                | 0.406044051                                               |
| 292.8564335                                              | 0.053803953                                                | 0.415113358                                               |
| 212.9905354                                              | 0.055171149                                                | 0.39391854                                                |
| 298.9493749                                              | 0.050251865                                                | 0.414151663                                               |
| 328.3010025                                              | 0.051515131                                                | 0.44102282                                                |
| 301.5997629                                              | 0.051918306                                                | 0.443793172                                               |
| 314.5954492                                              | 0.048472673                                                | 0.417091978                                               |
| 254.7964065                                              | 0.049542212                                                | 0.500283217                                               |
| 478.649205                                               | 0.05237956                                                 | 0.449434605                                               |
| 364.9564859                                              | 0.050374891                                                | 0.450401963                                               |
| 338.7322956                                              | 0.049395705                                                | 0.412721204                                               |
| 96.28210193                                              | 0.069719043                                                | 0.385373309                                               |
| 321.354137                                               | 0.050749238                                                | 0.459691359                                               |
| 319.4059715                                              | 0.056392805                                                | 0.473662387                                               |
| 360.798296                                               | 0.049852311                                                | 0.425554779                                               |
| 349.6859135                                              | 0.051633279                                                | 0.458546034                                               |
| 267.6586168                                              | 0.062583102                                                | 0.402132964                                               |
| 206.4187193                                              | 0.056959396                                                | 0.400537513                                               |
| 454.2044504                                              | 0.051508382                                                | 0.430773797                                               |
| 264.9179562                                              | 0.04797192                                                 | 0.423753322                                               |
| 291.0097247                                              | 0.04383                                                    | 0.42963                                                   |
| 215.102632                                               | 0.047856022                                                | 0.421361192                                               |
| 244.8346478                                              | 0.05454626                                                 | 0.431986704                                               |
| 216.3645168                                              | 0.059324451                                                | 0.399958716                                               |
| 217.7072934                                              | 0.054584688                                                | 0.411369812                                               |
| 298.9057784                                              | 0.061157184                                                | 0.418158226                                               |
| 387.701264                                               | 0.046840259                                                | 0.441629484                                               |
| 486.6100055                                              | 0.041953983                                                | 0.47895248                                                |
| 236.6065739                                              | 0.045391025                                                | 0.443569173                                               |
| 332.6565996                                              | 0.050814057                                                | 0.450082525                                               |
| 152.6105021                                              | 0.065926425                                                | 0.370441092                                               |
| 258.976167                                               | 0.04818763                                                 | 0.424613513                                               |
| 157.6095534                                              | 0.080638738                                                | 0.330327205                                               |
| 251.15488                                                | 0.047040957                                                | 0.432938537                                               |
| 284.7079593                                              | 0.052450442                                                | 0.430307686                                               |
| 292.8034341                                              | 0.059560524                                                | 0.426982295                                               |
| 312.3730897                                              | 0.056167976                                                | 0.398098799                                               |
| 242.9002222                                              | 0.07217365                                                 | 0.425164474                                               |
| 271.4387401                                              | 0.052241025                                                | 0.414278763                                               |
| 245.4582835                                              | 0.048894046                                                | 0.417424906                                               |
| 203.8352231                                              | 0.054667804                                                | 0.422689332                                               |
| 278.5285446                                              | 0.052439799                                                | 0.430546951                                               |
| 454.2227746                                              | 0.044815924                                                | 0.452782551                                               |
| 182.6025692                                              | 0.054699609                                                | 0.388738884                                               |
| 447.2212745                                              | 0.050480386                                                | 0.485285199                                               |
| 122.4139503                                              | 0.065759637                                                | 0.34791327                                                |
| 271.4307759                                              | 0.056697638                                                | 0.433089565                                               |

| log.sigma.2.0.mm.3D_glszm_SizeZoneNonUniformity | log.sigma.2.0.mm.3D_glszm_GrayLevelNonUniformity | log.sigma.2.0.mm.3D_glszm_LargeAreaEmphasis | log.sigma.2.0.mm.3D_glszm_ZoneVariance |
|-------------------------------------------------|--------------------------------------------------|---------------------------------------------|----------------------------------------|
| 455.1571429                                     | 40.88571429                                      | 29.26938776                                 | 24.58083715                            |
| 109.3295019                                     | 16.29501916                                      | 251.0842912                                 | 238.2508771                            |
| 172.3378995                                     | 24.8630137                                       | 279.7214612                                 | 267.4554742                            |
| 153.6971429                                     | 16.65142857                                      | 80.40857143                                 | 72.61649796                            |
| 381.5400458                                     | 45.66590389                                      | 83.81006865                                 | 76.46931701                            |
| 141.2542955                                     | 13.39175258                                      | 37.21649485                                 | 32.07248379                            |
| 835.6490872                                     | 103.8975659                                      | 246.744929                                  | 238.5331587                            |
| 711.4098985                                     | 79.56598985                                      | 630.3997462                                 | 619.8949084                            |
| 764.4280783                                     | 86.62255466                                      | 67.87226697                                 | 61.03064115                            |
| 185.8298368                                     | 22.17948718                                      | 29.77622378                                 | 23.53204992                            |
| 216.8752294                                     | 35.21651376                                      | 70.41100917                                 | 62.75487249                            |
| 409.5159091                                     | 42.58863636                                      | 68.56704545                                 | 61.70621772                            |
| 170.4396135                                     | 23.87439614                                      | 875.3792271                                 | 855.0421772                            |
| 253.590985                                      | 26.74958264                                      | 71.44073456                                 | 63.22423293                            |
| 355.1555834                                     | 36.44040151                                      | 27.42032622                                 | 21.22353745                            |
| 581.372093                                      | 73.55663916                                      | 606.3465866                                 | 595.5696749                            |
| 212.835249                                      | 28.27969349                                      | 14.83908046                                 | 9.607081517                            |
| 120.7482993                                     | 18.12244898                                      | 475.8129252                                 | 458.2243163                            |
| 153.2512563                                     | 27.91959799                                      | 68.0201005                                  | 57.3839802                             |
| 839.4584819                                     | 93.70198675                                      | 79.7050433                                  | 72.69050589                            |
| 279.0806676                                     | 44.26286509                                      | 1039.702364                                 | 1022.013262                            |
| 166.4117647                                     | 24.25831202                                      | 55.79283887                                 | 48.17749753                            |
| 143.223565                                      | 18.23867069                                      | 123.5951662                                 | 114.0244613                            |
| 411.2447699                                     | 54.51464435                                      | 60.08682008                                 | 52.42040909                            |
| 188.516129                                      | 22.2718894                                       | 142.9101382                                 | 134.306595                             |
| 448.1489776                                     | 46.40798442                                      | 36.20155794                                 | 30.88060725                            |
| 576.3984127                                     | 56.12539683                                      | 91.16587302                                 | 84.58216868                            |
| 435.3722854                                     | 49.55842813                                      | 96.94519131                                 | 88.78699033                            |
| 71.13471503                                     | 12.95854922                                      | 12.61658031                                 | 7.252436307                            |
| 249.2277228                                     | 36.56435644                                      | 252.3234323                                 | 240.835136                             |
| 723.6465296                                     | 81.69537275                                      | 431.2583548                                 | 421.9079655                            |
| 263.8713551                                     | 32.1457976                                       | 434.9451115                                 | 422.3505262                            |
| 484.9165247                                     | 54.21635434                                      | 104.3739353                                 | 96.80909266                            |
| 371.6055489                                     | 39.37153197                                      | 127.0784077                                 | 119.0426532                            |
| 765.7233065                                     | 84.33180253                                      | 52.35820896                                 | 45.9667748                             |
| 366.3682984                                     | 48.18414918                                      | 503.9219114                                 | 491.7045237                            |
| 498.9472196                                     | 52.60414703                                      | 746.1800189                                 | 733.8804873                            |
| 582.6565954                                     | 66.14812085                                      | 813.7472366                                 | 799.2825834                            |
| 157.7614458                                     | 27.68433735                                      | 34.38072289                                 | 25.59628393                            |
| 1117.088951                                     | 149.1417651                                      | 26.04100069                                 | 19.66002277                            |
| 314.0705726                                     | 42.20905459                                      | 350.4793609                                 | 338.5488217                            |
| 863.6917526                                     | 91.7                                             | 9.227319588                                 | 5.254078808                            |
| 556.4791367                                     | 70.21870504                                      | 70.68561151                                 | 63.778925                              |
| 439.42                                          | 46.182                                           | 61.972                                      | 55.781856                              |
| 189.9111617                                     | 23.50569476                                      | 111.1298405                                 | 102.6549779                            |
| 478.6457357                                     | 54.07778819                                      | 79.50421743                                 | 72.88577404                            |
| 671.8753914                                     | 81.77520351                                      | 255.5679399                                 | 247.4077413                            |
| 97.75572519                                     | 16.7480916                                       | 103.2633588                                 | 92.2115407                             |
| 181.8247423                                     | 18.39175258                                      | 21.21391753                                 | 16.40335716                            |
| 167.719603                                      | 22.98014888                                      | 264.1538462                                 | 252.8989034                            |
| 451.5524543                                     | 48.53224254                                      | 44.43984601                                 | 38.3262447                             |
| 733.1549637                                     | 78.16343826                                      | 14.71004843                                 | 10.54617596                            |
| 788.5167328                                     | 96.41463415                                      | 51.85479297                                 | 45.30490974                            |
| 151.0483871                                     | 21.06451613                                      | 86.1344086                                  | 77.32691641                            |
| 204.2357724                                     | 26.47154472                                      | 45.91056911                                 | 38.60299755                            |
| 248.562599                                      | 34.81299525                                      | 81.45800317                                 | 71.90784632                            |
| 688.7342153                                     | 83.56885147                                      | 38.40709561                                 | 32.49076338                            |
| 477.1866913                                     | 55.73937153                                      | 308.6377079                                 | 298.4237173                            |
| 276.4831461                                     | 32.34510433                                      | 49.21348315                                 | 42.21605703                            |
| 1455.651003                                     | 169.1696275                                      | 118.2449857                                 | 111.4027889                            |
| 279.6583184                                     | 27.6940966                                       | 267.9248658                                 | 257.9442398                            |
| 452.1312127                                     | 52.69383698                                      | 108.7634195                                 | 101.7193025                            |
| 977.8226624                                     | 109.3638876                                      | 191.8908337                                 | 184.7805415                            |
| 1105.680105                                     | 132.3310937                                      | 59.24636058                                 | 51.14969108                            |
| 95.57258065                                     | 17.29032258                                      | 102.8467742                                 | 92.6994667                             |
| 543.8148774                                     | 60.03634827                                      | 415.1310228                                 | 404.47353                              |
| 177.1497326                                     | 21.09090909                                      | 221.1283422                                 | 208.9717464                            |
| 921.326097                                      | 107.930254                                       | 208.4184758                                 | 200.0846535                            |
| 1112.891224                                     | 125.3139679                                      | 54.17676143                                 | 48.35290185                            |
| 305.6210526                                     | 47.56315789                                      | 582.3921053                                 | 567.8519321                            |
| 179.0402685                                     | 25.46085011                                      | 75.99328859                                 | 67.54821855                            |
| 544.9288538                                     | 65.15810277                                      | 501.0608696                                 | 489.5599244                            |
| 330.9513444                                     | 37.46606914                                      | 183.7298335                                 | 175.2147957                            |
| 429.63                                          | 43.83                                            | 31.199                                      | 26.095919                              |
| 589.0629471                                     | 66.90271817                                      | 28.30114449                                 | 23.28521073                            |
| 205.1936842                                     | 25.90947368                                      | 53.03157895                                 | 45.04946704                            |
| 291.969863                                      | 43.30684932                                      | 102.4712329                                 | 91.69844999                            |
| 112.7153285                                     | 14.95620438                                      | 154.4014599                                 | 142.176994                             |
| 241.2772964                                     | 35.28769497                                      | 93.74870017                                 | 84.9965368                             |
| 455.7616279                                     | 48.33914729                                      | 18.03972868                                 | 12.90282942                            |
| 445.4258065                                     | 39.0172043                                       | 30.17526882                                 | 25.60118973                            |
| 308.2805755                                     | 31.54676259                                      | 66.5942446                                  | 59.8936822                             |
| 476.6373938                                     | 53.81208687                                      | 374.5410765                                 | 365.0122829                            |
| 334.5083056                                     | 59.53156146                                      | 127.8527132                                 | 116.2716183                            |
| 415.6966292                                     | 47.17568948                                      | 35.6618999                                  | 29.45523616                            |
| 92.16129032                                     | 22.49820789                                      | 810.4229391                                 | 780.2714251                            |
| 406.5292865                                     | 44.171459                                        | 94.5228967                                  | 88.0716213                             |
| 394.5921483                                     | 48.09705562                                      | 224.8069793                                 | 215.8657706                            |
| 217.3339882                                     | 30.31630648                                      | 58.29862475                                 | 50.02593783                            |
| 228.5087108                                     | 32.24041812                                      | 197.412892                                  | 184.966993                             |
| 129.25                                          | 21.94078947                                      | 681.2763158                                 | 662.8767313                            |
| 450.7352941                                     | 56.83823529                                      | 12.76286765                                 | 7.969665739                            |
| 851.9642332                                     | 99.79274865                                      | 42.30132288                                 | 35.85256                               |
| 453.9683426                                     | 58.7132216                                       | 193.2458101                                 | 183.8047814                            |
| 777.9983398                                     | 94.7587161                                       | 26.67515219                                 | 20.87470511                            |
| 516.6248904                                     | 51.13496933                                      | 358.8080631                                 | 349.8133209                            |
| 394.9586614                                     | 55.57480315                                      | 51.65846457                                 | 43.97094422                            |
| 171.7909605                                     | 17.8700565                                       | 123.8615819                                 | 115.1140237                            |
| 80.36796537                                     | 15.19047619                                      | 113.6796537                                 | 100.6447405                            |
| 682.9822448                                     | 89.41217502                                      | 880.7266963                                 | 867.3209754                            |

| log.sigma.2.0.mm.3D_glszm_ZonePercentage | log.sigma.2.0.mm.3D_glszm_LargeAreaLowGrayLevelEmphasis | log.sigma.2.0.mm.3D_glszm_LargeAreaHighGrayLevelEmphasis | log.sigma.2.0.mm.3D_glszm_HighGrayLevelZoneEmphasis |
|------------------------------------------|---------------------------------------------------------|----------------------------------------------------------|-----------------------------------------------------|
| 0.461828464                              | 0.043447165                                             | 21537.52245                                              | 691.2642857                                         |
| 0.279144385                              | 0.901877873                                             | 71227.69349                                              | 305.7509579                                         |
| 0.285528031                              | 1.402926657                                             | 57113.41096                                              | 259.5273973                                         |
| 0.358239509                              | 0.171183129                                             | 40030.92286                                              | 405.2142857                                         |
| 0.369087838                              | 0.218972351                                             | 33845.754                                                | 368.6270023                                         |
| 0.440909091                              | 0.091608575                                             | 16355.7732                                               | 479.3024055                                         |
| 0.348964785                              | 0.549656236                                             | 111682.8996                                              | 497.763917                                          |
| 0.30853563                               | 1.469220539                                             | 272102.9619                                              | 454.0615482                                         |
| 0.382314122                              | 0.140481161                                             | 34283.39758                                              | 480.2882624                                         |
| 0.400186567                              | 0.083434218                                             | 11748.29837                                              | 373.4125874                                         |
| 0.361405836                              | 0.289371872                                             | 17967.20734                                              | 248.4238532                                         |
| 0.381778742                              | 0.130660722                                             | 38310.55682                                              | 549.7636364                                         |
| 0.221746117                              | 2.17675606                                              | 353900.6184                                              | 412.5676329                                         |
| 0.348864298                              | 0.096170256                                             | 56057.00668                                              | 780.5709516                                         |
| 0.40171371                               | 0.063817706                                             | 13796.13049                                              | 482.5809285                                         |
| 0.304616088                              | 1.181507709                                             | 312952.3646                                              | 514.3975994                                         |
| 0.43718593                               | 0.054612147                                             | 4782.189655                                              | 331.9712644                                         |
| 0.238442822                              | 1.561782158                                             | 146786.3163                                              | 312.755102                                          |
| 0.306625578                              | 0.223152868                                             | 21554.64322                                              | 303.1909548                                         |
| 0.37757261                               | 0.169682853                                             | 38637.25471                                              | 505.1456954                                         |
| 0.23776455                               | 3.427932015                                             | 317238.1822                                              | 328.6216968                                         |
| 0.362372567                              | 0.193397741                                             | 16892.27621                                              | 291.4245524                                         |
| 0.323242188                              | 0.248514796                                             | 63048.82779                                              | 509.4592145                                         |
| 0.361163581                              | 0.19777578                                              | 19098.5251                                               | 339.5470711                                         |
| 0.340926944                              | 0.253233306                                             | 82672.40323                                              | 615.578341                                          |
| 0.433516252                              | 0.097122736                                             | 14682.57254                                              | 461.6183057                                         |
| 0.3897309                                | 0.222908279                                             | 39122.24603                                              | 465.8603175                                         |
| 0.350108617                              | 0.215524943                                             | 45093.35057                                              | 463.3205791                                         |
| 0.431767338                              | 0.060406268                                             | 3197.829016                                              | 267.5699482                                         |
| 0.29503408                               | 0.570508838                                             | 113037.0495                                              | 419.7656766                                         |
| 0.327028163                              | 0.785848306                                             | 238652.1234                                              | 581.8817481                                         |
| 0.281778637                              | 1.149610136                                             | 166527.7033                                              | 344.8456261                                         |
| 0.363580056                              | 0.241492343                                             | 46979.41567                                              | 439.9693356                                         |
| 0.352765957                              | 0.256462863                                             | 65553.04825                                              | 520.8552473                                         |
| 0.3955495                                | 0.121806972                                             | 23466.11596                                              | 484.7801378                                         |
| 0.286095365                              | 1.342647892                                             | 190632.1189                                              | 420.9428904                                         |
| 0.285138404                              | 0.928175551                                             | 602374.5259                                              | 790.4156456                                         |
| 0.26293354                               | 1.20092988                                              | 553609.3272                                              | 737.4959469                                         |
| 0.337398374                              | 0.081879523                                             | 15642.33976                                              | 396.2650602                                         |
| 0.395873453                              | 0.092882251                                             | 8203.395066                                              | 324.5813065                                         |
| 0.289514264                              | 1.140132206                                             | 109926.5979                                              | 288.6284953                                         |
| 0.50168089                               | 0.037534739                                             | 3009.379897                                              | 331.1489691                                         |
| 0.380509171                              | 0.167353531                                             | 31303.17266                                              | 451.3158273                                         |
| 0.40192926                               | 0.112480702                                             | 35935.637                                                | 554.204                                             |
| 0.343505477                              | 0.254948944                                             | 50168.73576                                              | 481.8382688                                         |
| 0.38870674                               | 0.255857956                                             | 25698.59044                                              | 352.163074                                          |
| 0.350065761                              | 0.60154166                                              | 109992.7652                                              | 454.8998121                                         |
| 0.300803674                              | 0.361184338                                             | 30540.64504                                              | 284.7251908                                         |
| 0.455934195                              | 0.071753658                                             | 7555.873711                                              | 339.193299                                          |
| 0.298076923                              | 0.959662878                                             | 73998.85856                                              | 325.3151365                                         |
| 0.404437524                              | 0.080250966                                             | 26021.0154                                               | 620.4177093                                         |
| 0.490062296                              | 0.036619887                                             | 6850.831719                                              | 461.7003632                                         |
| 0.390735816                              | 0.148068564                                             | 18964.33012                                              | 353.0981282                                         |
| 0.336956522                              | 0.347445833                                             | 22325.88978                                              | 290.8010753                                         |
| 0.369924812                              | 0.105796677                                             | 21030.00203                                              | 453.2865854                                         |
| 0.323589744                              | 0.238304542                                             | 29647.62758                                              | 346.1156894                                         |
| 0.411124845                              | 0.088969857                                             | 17616.6819                                               | 454.3926639                                         |
| 0.312897629                              | 0.613879927                                             | 156807.8189                                              | 490.2578558                                         |
| 0.378033981                              | 0.108767351                                             | 23392.78331                                              | 452.9454254                                         |
| 0.382298171                              | 0.289410572                                             | 49651.84785                                              | 474.2269341                                         |
| 0.316534541                              | 0.78630072                                              | 92656.46154                                              | 361.4794275                                         |
| 0.376779026                              | 0.153875404                                             | 78215.57555                                              | 719.7673956                                         |
| 0.375021593                              | 0.372745037                                             | 99827.24136                                              | 548.528328                                          |
| 0.351436442                              | 0.116699808                                             | 31381.891                                                | 518.6360582                                         |
| 0.313924051                              | 0.76859284                                              | 14734.46774                                              | 156.6733871                                         |
| 0.30631797                               | 0.914550153                                             | 190135.2527                                              | 468.1065089                                         |
| 0.286809816                              | 0.448822374                                             | 110952.9866                                              | 467.1898396                                         |
| 0.3464                                   | 0.368222758                                             | 119224.8522                                              | 544.7394919                                         |
| 0.41437596                               | 0.103077049                                             | 29527.26329                                              | 514.9200659                                         |
| 0.262249827                              | 1.367309606                                             | 249618.8342                                              | 427.2065789                                         |
| 0.344110855                              | 0.221734217                                             | 27214.87472                                              | 334.7628635                                         |
| 0.294871795                              | 0.75600912                                              | 333732.4538                                              | 693.4798419                                         |
| 0.342694164                              | 0.490102608                                             | 70990.45327                                              | 407.212548                                          |
| 0.442673749                              | 0.069672972                                             | 15597.883                                                | 444.92                                              |
| 0.446502715                              | 0.10137582                                              | 8971.165951                                              | 324.4206009                                         |
| 0.353949329                              | 0.144795873                                             | 21301.6                                                  | 370.2484211                                         |
| 0.304674457                              | 0.337218413                                             | 31896.14247                                              | 341.4671233                                         |
| 0.286012526                              | 0.453908893                                             | 54466.18978                                              | 349.6131387                                         |
| 0.338019918                              | 0.195022383                                             | 46206.86655                                              | 460.0519931                                         |
| 0.441214194                              | 0.037485243                                             | 10496.62694                                              | 558.6860465                                         |
| 0.467571644                              | 0.044541252                                             | 22167.36129                                              | 700.1569892                                         |
| 0.386325737                              | 0.184447979                                             | 25999.0705                                               | 360.1007194                                         |
| 0.323952279                              | 0.813984107                                             | 173881.3352                                              | 489.3956563                                         |
| 0.293849658                              | 0.514617423                                             | 32755.90144                                              | 245.2879291                                         |
| 0.401394014                              | 0.098414441                                             | 14418.34014                                              | 392.1225741                                         |
| 0.182114883                              | 2.757103179                                             | 239976.5878                                              | 280.1971326                                         |
| 0.393710692                              | 0.260695797                                             | 35911.99681                                              | 370.4707135                                         |
| 0.334427425                              | 0.581977936                                             | 88622.29553                                              | 434.997819                                          |
| 0.347677596                              | 0.13918703                                              | 26044.50098                                              | 445.9921415                                         |
| 0.28345679                               | 0.388684184                                             | 101942.7404                                              | 501.8519164                                         |
| 0.233128834                              | 2.034382894                                             | 229549.1579                                              | 375.6414474                                         |
| 0.456759026                              | 0.039004038                                             | 4933.289522                                              | 406.0395221                                         |
| 0.393787382                              | 0.116267914                                             | 16583.31455                                              | 379.2229299                                         |
| 0.325454545                              | 0.617194283                                             | 62203.46089                                              | 321.179702                                          |
| 0.415211397                              | 0.065948655                                             | 11780.35141                                              | 416.610404                                          |
| 0.333430742                              | 0.556077794                                             | 234001.9781                                              | 676.4425942                                         |
| 0.360667377                              | 0.191254852                                             | 15118.31004                                              | 281.7942913                                         |
| 0.338108883                              | 0.180839592                                             | 87171.57627                                              | 636.2231638                                         |
| 0.276978417                              | 0.482026574                                             | 28014.15584                                              | 212.5367965                                         |
| 0.273120887                              | 2.302534141                                             | 338556.7933                                              | 419.1686747                                         |

| log.sigma.2.0.mm.3D_glszm_SmallAreaEmphasis | log.sigma.2.0.mm.3D_glszm_LowGrayLevelZoneEmphasis | log.sigma.2.0.mm.3D_glszm_ZoneEntropy | log.sigma.2.0.mm.3D_glszm_SmallAreaLowGrayLevelEmphasis |
|---------------------------------------------|----------------------------------------------------|---------------------------------------|---------------------------------------------------------|
| 0.708644839                                 | 0.00360815                                         | 6.315796951                           | 0.003085712                                             |
| 0.670917012                                 | 0.011085262                                        | 5.759346828                           | 0.009230188                                             |
| 0.650005119                                 | 0.01357049                                         | 5.988567323                           | 0.011120079                                             |
| 0.688834372                                 | 0.008475404                                        | 6.053487667                           | 0.007446767                                             |
| 0.68616064                                  | 0.00707483                                         | 6.09649976                            | 0.005177967                                             |
| 0.72412695                                  | 0.007013663                                        | 5.922324663                           | 0.006286172                                             |
| 0.676883727                                 | 0.003349207                                        | 6.308093038                           | 0.002524965                                             |
| 0.698544025                                 | 0.00484999                                         | 6.181527025                           | 0.004018808                                             |
| 0.689837071                                 | 0.004049978                                        | 6.303227177                           | 0.002874055                                             |
| 0.684522835                                 | 0.00801645                                         | 6.065471397                           | 0.006972217                                             |
| 0.655549878                                 | 0.009520678                                        | 5.909334527                           | 0.007301758                                             |
| 0.709241879                                 | 0.006012442                                        | 6.219134927                           | 0.004976214                                             |
| 0.66729416                                  | 0.007293902                                        | 6.055312089                           | 0.006240345                                             |
| 0.676331037                                 | 0.005019193                                        | 6.377996402                           | 0.004470791                                             |
| 0.694052548                                 | 0.006838005                                        | 6.281798707                           | 0.005419957                                             |
| 0.686909062                                 | 0.004139847                                        | 6.217237362                           | 0.003332946                                             |
| 0.663152438                                 | 0.006753416                                        | 6.027816214                           | 0.00541151                                              |
| 0.665131786                                 | 0.009264879                                        | 5.828060461                           | 0.007430489                                             |
| 0.644968448                                 | 0.007014215                                        | 5.881356534                           | 0.005743967                                             |
| 0.679506756                                 | 0.004805721                                        | 6.370965934                           | 0.003951357                                             |
| 0.645434464                                 | 0.006271482                                        | 6.078697089                           | 0.004882506                                             |
| 0.678179718                                 | 0.008432396                                        | 5.819696274                           | 0.007083908                                             |
| 0.684033521                                 | 0.005986036                                        | 5.960566961                           | 0.005266227                                             |
| 0.681810038                                 | 0.005908368                                        | 6.086237661                           | 0.004706636                                             |
| 0.685267329                                 | 0.006638941                                        | 6.089875937                           | 0.006100193                                             |
| 0.687100549                                 | 0.005582364                                        | 6.362440211                           | 0.004628547                                             |
| 0.703245478                                 | 0.005519895                                        | 6.306898731                           | 0.004062215                                             |
| 0.697705009                                 | 0.005592832                                        | 6.158747195                           | 0.004611114                                             |
| 0.623050864                                 | 0.0103345                                          | 5.628104079                           | 0.008723362                                             |
| 0.666973687                                 | 0.006852197                                        | 6.057579654                           | 0.005943655                                             |
| 0.708932699                                 | 0.004527101                                        | 6.158992311                           | 0.003824373                                             |
| 0.698779274                                 | 0.008043991                                        | 5.949257126                           | 0.006912135                                             |
| 0.668277414                                 | 0.005796502                                        | 6.457274378                           | 0.004597113                                             |
| 0.696357417                                 | 0.005371675                                        | 6.255373973                           | 0.003674247                                             |
| 0.689351986                                 | 0.003977372                                        | 6.303637439                           | 0.003130627                                             |
| 0.679302333                                 | 0.005239755                                        | 6.125352265                           | 0.004199655                                             |
| 0.712815606                                 | 0.002936839                                        | 6.22583873                            | 0.002528397                                             |
| 0.681604002                                 | 0.003046716                                        | 6.414228689                           | 0.002548314                                             |
| 0.640632614                                 | 0.006851235                                        | 5.954452825                           | 0.005888652                                             |
| 0.647005311                                 | 0.005650011                                        | 6.441188182                           | 0.004063588                                             |
| 0.672617191                                 | 0.010221757                                        | 6.178426236                           | 0.00842864                                              |
| 0.693974069                                 | 0.006435953                                        | 6.284996877                           | 0.005041438                                             |
| 0.657452935                                 | 0.004913733                                        | 6.347563245                           | 0.003421929                                             |
| 0.687943725                                 | 0.005307576                                        | 6.261616452                           | 0.004513211                                             |
| 0.683803581                                 | 0.007660533                                        | 6.033398876                           | 0.006885924                                             |
| 0.695982568                                 | 0.00751741                                         | 6.149651114                           | 0.006249151                                             |
| 0.674426451                                 | 0.005351701                                        | 6.333094675                           | 0.004332026                                             |
| 0.630703331                                 | 0.011101037                                        | 5.89217757                            | 0.009619171                                             |
| 0.711742864                                 | 0.0111268                                          | 6.027114106                           | 0.009750561                                             |
| 0.667329371                                 | 0.008962069                                        | 5.886271415                           | 0.007770698                                             |
| 0.685332114                                 | 0.004197451                                        | 6.330693977                           | 0.003557126                                             |
| 0.692554571                                 | 0.004488409                                        | 6.289150384                           | 0.003512857                                             |
| 0.695651448                                 | 0.005439559                                        | 6.148415201                           | 0.004376028                                             |
| 0.662417911                                 | 0.009519666                                        | 5.989655007                           | 0.007559175                                             |
| 0.669700159                                 | 0.0051202                                          | 6.042548567                           | 0.004278935                                             |
| 0.650946279                                 | 0.010659462                                        | 6.146961604                           | 0.008924914                                             |
| 0.668236686                                 | 0.00440738                                         | 6.293752211                           | 0.00333681                                              |
| 0.690685278                                 | 0.004586347                                        | 6.24777379                            | 0.003836283                                             |
| 0.692758606                                 | 0.005552901                                        | 6.14126122                            | 0.00473687                                              |
| 0.671292798                                 | 0.00458187                                         | 6.439056927                           | 0.003528639                                             |
| 0.734744596                                 | 0.007958747                                        | 5.988208743                           | 0.007032915                                             |
| 0.696848681                                 | 0.003015752                                        | 6.105150189                           | 0.002560432                                             |
| 0.697616221                                 | 0.003343794                                        | 6.205926979                           | 0.002717792                                             |
| 0.667890143                                 | 0.004017981                                        | 6.467710635                           | 0.003178453                                             |
| 0.644528688                                 | 0.020556618                                        | 5.717915284                           | 0.016102502                                             |
| 0.705006677                                 | 0.005443473                                        | 6.212556599                           | 0.004658967                                             |
| 0.714955317                                 | 0.007019355                                        | 5.851687785                           | 0.006175347                                             |
| 0.678232313                                 | 0.003324718                                        | 6.392797753                           | 0.002592691                                             |
| 0.704203839                                 | 0.003880762                                        | 6.2192021                             | 0.003199188                                             |
| 0.659412214                                 | 0.004870114                                        | 6.086550588                           | 0.003895292                                             |
| 0.65703202                                  | 0.007628937                                        | 6.020410204                           | 0.006284303                                             |
| 0.682491896                                 | 0.003029348                                        | 6.292553777                           | 0.002536536                                             |
| 0.676439711                                 | 0.006890848                                        | 6.262484898                           | 0.004666335                                             |
| 0.680116926                                 | 0.006245254                                        | 6.321791182                           | 0.005263381                                             |
| 0.674782248                                 | 0.007867675                                        | 6.308476475                           | 0.00624616                                              |
| 0.683257722                                 | 0.010164888                                        | 6.012402725                           | 0.008591173                                             |
| 0.657471675                                 | 0.006013529                                        | 6.117455404                           | 0.004862855                                             |
| 0.66628114                                  | 0.01427238                                         | 5.918132875                           | 0.013077643                                             |
| 0.672439161                                 | 0.005036951                                        | 5.956651556                           | 0.004229553                                             |
| 0.690500033                                 | 0.00462945                                         | 6.307716279                           | 0.003635196                                             |
| 0.719562323                                 | 0.003589838                                        | 6.254786463                           | 0.003096344                                             |
| 0.691778614                                 | 0.011640579                                        | 6.238713251                           | 0.010175082                                             |
| 0.69774284                                  | 0.00441129                                         | 6.180871667                           | 0.003509413                                             |
| 0.63247456                                  | 0.007300831                                        | 6.121673483                           | 0.005313162                                             |
| 0.677250599                                 | 0.007689094                                        | 6.302704405                           | 0.006419645                                             |
| 0.589471055                                 | 0.009266277                                        | 5.796205584                           | 0.007487633                                             |
| 0.683586258                                 | 0.007079262                                        | 6.244802387                           | 0.005639168                                             |
| 0.682199639                                 | 0.005559591                                        | 6.196521603                           | 0.003832037                                             |
| 0.678994167                                 | 0.007889195                                        | 5.986505829                           | 0.007028816                                             |
| 0.654907939                                 | 0.005418614                                        | 6.189032633                           | 0.004626575                                             |
| 0.677485431                                 | 0.006645199                                        | 5.546886449                           | 0.005709769                                             |
| 0.668805102                                 | 0.005249937                                        | 6.230305931                           | 0.004145056                                             |
| 0.671576481                                 | 0.005767377                                        | 6.397138813                           | 0.004406403                                             |
| 0.675946319                                 | 0.009611601                                        | 6.180224316                           | 0.007917848                                             |
| 0.682155465                                 | 0.004376026                                        | 6.2501485                             | 0.003300584                                             |
| 0.699686602                                 | 0.004055537                                        | 6.353468717                           | 0.003392028                                             |
| 0.646142331                                 | 0.010011002                                        | 6.247551455                           | 0.008054897                                             |
| 0.723843505                                 | 0.005195551                                        | 5.923744929                           | 0.004710488                                             |
| 0.610491073                                 | 0.016020244                                        | 5.806827084                           | 0.013917835                                             |
| 0.683643033                                 | 0.004568157                                        | 6.120477884                           | 0.003634384                                             |



| log.sigma.2.0.mm.3D_ngtdm_Coarseness | log.sigma.2.0.mm.3D_ngtdm_Complexity | log.sigma.2.0.mm.3D_ngtdm_Strength | log.sigma.2.0.mm.3D_ngtdm_Busyness | log.sigma.2.0.mm.3D_ngtdm_Contrast |
|--------------------------------------|--------------------------------------|------------------------------------|------------------------------------|------------------------------------|
| 0.003300357                          | 1.229346425                          | 2.023558124                        | 0.212810179                        | 7.41E-05                           |
| 0.007185376                          | 0.785670374                          | 2.885607683                        | 0.190589581                        | 5.76E-05                           |
| 0.005176738                          | 0.413097123                          | 1.445008818                        | 0.351658356                        | 4.45E-05                           |
| 0.00730341                           | 1.308181466                          | 2.929917891                        | 0.151996273                        | 0.000138582                        |
| 0.002733465                          | 0.478696806                          | 1.140719091                        | 0.438803044                        | 4.14E-05                           |
| 0.000958792                          | 2.195100276                          | 4.670683654                        | 0.111685194                        | 0.000195833                        |
| 0.001296764                          | 0.285291092                          | 0.835256709                        | 0.634004092                        | 9.30E-06                           |
| 0.001434256                          | 0.245665844                          | 0.82080517                         | 0.639226363                        | 1.16E-05                           |
| 0.001530676                          | 0.383858862                          | 0.882631978                        | 0.56471317                         | 1.71E-05                           |
| 0.006315448                          | 1.036867929                          | 2.532075375                        | 0.193907219                        | 9.38E-05                           |
| 0.004686601                          | 0.451116874                          | 1.227209276                        | 0.390419827                        | 5.14E-05                           |
| 0.002813036                          | 0.777185399                          | 1.802663173                        | 0.288218524                        | 4.18E-05                           |
| 0.00397087                           | 0.427327942                          | 2.184136474                        | 0.245457584                        | 2.24E-05                           |
| 0.004338663                          | 1.286577542                          | 3.493157192                        | 0.140574332                        | 4.92E-05                           |
| 0.003426032                          | 0.974923213                          | 1.841074186                        | 0.257324144                        | 6.26E-05                           |
| 0.00163338                           | 0.294501273                          | 0.978875078                        | 0.527440226                        | 1.36E-05                           |
| 0.006097846                          | 0.658520557                          | 1.353262153                        | 0.312275683                        | 0.000119915                        |
| 0.005441549                          | 0.496990914                          | 1.997536349                        | 0.263295969                        | 4.52E-05                           |
| 0.005128686                          | 0.517578674                          | 1.644331133                        | 0.306963228                        | 4.45E-05                           |
| 0.001353789                          | 0.32380651                           | 0.86697111                         | 0.617297152                        | 1.38E-05                           |
| 0.002452528                          | 0.190287529                          | 0.867195249                        | 0.586760808                        | 1.51E-05                           |
| 0.005859493                          | 0.629800717                          | 1.592006162                        | 0.305406749                        | 8.06E-05                           |
| 0.00697498                           | 0.996117361                          | 2.949310049                        | 0.151967009                        | 7.91E-05                           |
| 0.002805158                          | 0.303983312                          | 0.842321336                        | 0.544094888                        | 3.06E-05                           |
| 0.005776825                          | 1.283552271                          | 4.174907768                        | 0.12594317                         | 5.04E-05                           |
| 0.003151088                          | 0.787330522                          | 1.68043327                         | 0.314763544                        | 4.83E-05                           |
| 0.002373745                          | 0.47998212                           | 1.043828053                        | 0.442707602                        | 3.56E-05                           |
| 0.002562046                          | 0.467624106                          | 1.345140899                        | 0.36642306                         | 2.59E-05                           |
| 0.013683955                          | 1.090253675                          | 2.24709683                         | 0.201410687                        | 0.000313573                        |
| 0.003152589                          | 0.434306196                          | 1.469048139                        | 0.341286416                        | 2.69E-05                           |
| 0.001514469                          | 0.390455616                          | 1.285433471                        | 0.436034667                        | 1.02E-05                           |
| 0.003574346                          | 0.385080377                          | 1.236836504                        | 0.360940273                        | 3.76E-05                           |
| 0.002400589                          | 0.528478847                          | 1.260562794                        | 0.407767631                        | 3.01E-05                           |
| 0.003238491                          | 0.580795485                          | 1.560476076                        | 0.289112372                        | 4.25E-05                           |
| 0.001684794                          | 0.432120546                          | 1.051221817                        | 0.502561496                        | 1.70E-05                           |
| 0.002553325                          | 0.323960558                          | 1.14578021                         | 0.423105795                        | 1.90E-05                           |
| 0.001979909                          | 0.586710012                          | 2.112749561                        | 0.255253498                        | 1.17E-05                           |
| 0.001628323                          | 0.35994386                           | 1.652293286                        | 0.33154653                         | 7.08E-06                           |
| 0.004875354                          | 0.786282663                          | 2.142979361                        | 0.248568778                        | 5.56E-05                           |
| 0.001035517                          | 0.178777568                          | 0.402664101                        | 1.312419533                        | 1.25E-05                           |
| 0.002910005                          | 0.340991442                          | 1.021231849                        | 0.465112829                        | 2.83E-05                           |
| 0.001809375                          | 0.470569321                          | 0.759648391                        | 0.775712849                        | 3.69E-05                           |
| 0.001960137                          | 0.401437009                          | 0.982110955                        | 0.500313367                        | 2.24E-05                           |
| 0.002655258                          | 0.788136281                          | 1.489673751                        | 0.308167931                        | 4.60E-05                           |
| 0.005469449                          | 0.961498296                          | 2.868057102                        | 0.182566635                        | 6.34E-05                           |
| 0.00262856                           | 0.476355576                          | 1.102686939                        | 0.471359084                        | 3.31E-05                           |
| 0.001629478                          | 0.318266728                          | 0.887872065                        | 0.571612617                        | 1.53E-05                           |
| 0.006813196                          | 0.787044442                          | 2.637466942                        | 0.218012154                        | 6.69E-05                           |
| 0.007532726                          | 1.485587184                          | 2.689533237                        | 0.183131919                        | 0.000176631                        |
| 0.005283939                          | 0.556022886                          | 1.924143571                        | 0.289186321                        | 5.40E-05                           |
| 0.002797889                          | 0.808946863                          | 1.937394518                        | 0.258058593                        | 3.35E-05                           |
| 0.002005466                          | 0.644521005                          | 1.085340608                        | 0.48393557                         | 3.51E-05                           |
| 0.001497335                          | 0.290575977                          | 0.640966677                        | 0.780290336                        | 1.75E-05                           |
| 0.006389545                          | 0.799262014                          | 2.0647309                          | 0.24765613                         | 7.22E-05                           |
| 0.005299589                          | 0.706461001                          | 1.781578056                        | 0.240293352                        | 7.23E-05                           |
| 0.003666609                          | 0.463253855                          | 1.440771901                        | 0.343710827                        | 3.83E-05                           |
| 0.0017661                            | 0.343951095                          | 0.766573035                        | 0.616801682                        | 2.56E-05                           |
| 0.00217355                           | 0.400440891                          | 1.243078268                        | 0.386053686                        | 1.74E-05                           |
| 0.004111319                          | 0.898364898                          | 2.126513628                        | 0.225120216                        | 4.87E-05                           |
| 0.000844132                          | 0.192118108                          | 0.416847078                        | 1.101860683                        | 9.65E-06                           |
| 0.003950969                          | 0.612561023                          | 1.940568351                        | 0.281894684                        | 3.89E-05                           |
| 0.002537751                          | 0.621682446                          | 1.567791445                        | 0.28175477                         | 3.01E-05                           |
| 0.001246073                          | 0.258897525                          | 0.664812763                        | 0.712455737                        | 1.44E-05                           |
| 0.000927767                          | 0.205743494                          | 0.581653194                        | 0.903450795                        | 8.86E-06                           |
| 0.008663335                          | 0.567679591                          | 1.564882775                        | 0.346010159                        | 0.000114438                        |
| 0.001924737                          | 0.346932393                          | 1.124174921                        | 0.446250127                        | 1.46E-05                           |
| 0.005367911                          | 0.834929847                          | 2.767955663                        | 0.172463408                        | 4.47E-05                           |
| 0.00114625                           | 0.329444071                          | 0.861882138                        | 0.611873822                        | 9.71E-06                           |
| 0.001237266                          | 0.331924115                          | 0.911981734                        | 0.60237923                         | 1.07E-05                           |
| 0.002450426                          | 0.267029639                          | 1.135699886                        | 0.454018715                        | 1.56E-05                           |
| 0.005451299                          | 0.768337218                          | 1.947877687                        | 0.240529703                        | 6.34E-05                           |
| 0.001743249                          | 0.417142125                          | 1.575569479                        | 0.34653967                         | 1.06E-05                           |
| 0.0033738                            | 0.610293843                          | 1.585846302                        | 0.302193094                        | 3.67E-05                           |
| 0.003043503                          | 0.807984475                          | 1.317820035                        | 0.349363888                        | 7.29E-05                           |
| 0.002208821                          | 0.489330796                          | 0.804176292                        | 0.656003741                        | 4.43E-05                           |
| 0.004964277                          | 0.796225618                          | 2.112913424                        | 0.230094371                        | 6.14E-05                           |
| 0.002969026                          | 0.325168907                          | 1.171955515                        | 0.455014208                        | 2.27E-05                           |
| 0.00694745                           | 0.886889933                          | 2.765130377                        | 0.186559812                        | 7.96E-05                           |
| 0.003776132                          | 0.650382766                          | 1.991523465                        | 0.262781221                        | 3.45E-05                           |
| 0.003113826                          | 1.055405136                          | 2.034869576                        | 0.246258219                        | 4.39E-05                           |
| 0.003536265                          | 1.279938543                          | 2.207908833                        | 0.197409342                        | 7.50E-05                           |
| 0.004066315                          | 0.798716697                          | 1.623304444                        | 0.277761566                        | 6.29E-05                           |
| 0.002405549                          | 0.425419316                          | 1.303362143                        | 0.363543441                        | 1.82E-05                           |
| 0.002369288                          | 0.157797285                          | 0.501619572                        | 0.902113932                        | 2.42E-05                           |
| 0.002831359                          | 0.675464458                          | 1.27217664                         | 0.382577164                        | 4.59E-05                           |
| 0.004642223                          | 0.229376796                          | 1.609674047                        | 0.351719602                        | 1.97E-05                           |
| 0.003058884                          | 0.6892619                            | 1.319150639                        | 0.362102721                        | 4.87E-05                           |
| 0.002630307                          | 0.386285229                          | 1.092437654                        | 0.441800926                        | 3.14E-05                           |
| 0.004717001                          | 0.681348556                          | 2.123450303                        | 0.22523733                         | 4.79E-05                           |
| 0.003467131                          | 0.577957957                          | 2.231288682                        | 0.24576077                         | 2.58E-05                           |
| 0.005219019                          | 0.26657303                           | 1.414586446                        | 0.33172166                         | 3.96E-05                           |
| 0.00289003                           | 0.633867257                          | 1.250790455                        | 0.410203969                        | 4.29E-05                           |
| 0.00135553                           | 0.341079358                          | 0.731977293                        | 0.7303868                          | 1.69E-05                           |
| 0.002219759                          | 0.242971084                          | 0.720942762                        | 0.663551719                        | 2.83E-05                           |
| 0.001573364                          | 0.365058301                          | 0.757092839                        | 0.651386993                        | 2.00E-05                           |
| 0.002127314                          | 0.589222093                          | 1.729010849                        | 0.297682844                        | 2.18E-05                           |
| 0.002481632                          | 0.371129411                          | 0.942030111                        | 0.579424546                        | 2.78E-05                           |
| 0.006517393                          | 1.349920877                          | 3.590908774                        | 0.119603451                        | 8.42E-05                           |
| 0.007906012                          | 0.533673654                          | 1.761497427                        | 0.27342445                         | 9.55E-05                           |
| 0.001205099                          | 0.171116693                          | 0.691062106                        | 0.834874587                        | 7.54E-06                           |

| log.sigma.1.5.mm.3D_gldm_GrayLevelVariance | log.sigma.1.5.mm.3D_gldm_HighGrayLevelEmphasis | log.sigma.1.5.mm.3D_gldm_GrayLevelNonUniformityNormalized | log.sigma.1.5.mm.3D_gldm_DependenceEntropy |
|--------------------------------------------|------------------------------------------------|-----------------------------------------------------------|--------------------------------------------|
| 34.98911542                                | 999.0301602                                    | 0.061420636                                               | 6.453184193                                |
| 12.79112814                                | 357.4791444                                    | 0.117099145                                               | 5.886175673                                |
| 12.48998366                                | 316.9856584                                    | 0.117030915                                               | 6.304892632                                |
| 23.87287343                                | 640.7113613                                    | 0.077888676                                               | 6.370395125                                |
| 19.14843161                                | 385.3179899                                    | 0.087372383                                               | 6.337044455                                |
| 28.27157025                                | 587.8090909                                    | 0.070091827                                               | 6.129842021                                |
| 16.4275481                                 | 475.1270572                                    | 0.087679541                                               | 6.401821094                                |
| 17.63041755                                | 668.5295615                                    | 0.106649235                                               | 6.285238505                                |
| 20.17008658                                | 524.6201056                                    | 0.078032853                                               | 6.419933752                                |
| 21.94156462                                | 584.454291                                     | 0.077329653                                               | 6.175190158                                |
| 12.56398193                                | 310.5842175                                    | 0.092055457                                               | 6.131165042                                |
| 26.55027898                                | 744.8832972                                    | 0.075612857                                               | 6.359503691                                |
| 13.76929898                                | 592.6523835                                    | 0.152572705                                               | 6.088392284                                |
| 24.82087617                                | 666.5888177                                    | 0.078909762                                               | 6.371737521                                |
| 28.94208685                                | 728.0700605                                    | 0.074624211                                               | 6.328322621                                |
| 15.75617122                                | 597.0002285                                    | 0.105984968                                               | 6.29724136                                 |
| 19.41920659                                | 283.1959799                                    | 0.070044527                                               | 6.200336556                                |
| 11.50928541                                | 467.8669911                                    | 0.12958523                                                | 6.077466726                                |
| 12.09418603                                | 504.298151                                     | 0.099188986                                               | 6.00987749                                 |
| 22.49079067                                | 675.9180612                                    | 0.078418953                                               | 6.338007131                                |
| 9.539742794                                | 380.4970238                                    | 0.130442571                                               | 6.216097159                                |
| 15.33285806                                | 356.1612604                                    | 0.082847967                                               | 6.008756367                                |
| 17.18587875                                | 707.5820313                                    | 0.091213226                                               | 6.146551781                                |
| 15.53522681                                | 521.7257272                                    | 0.086808184                                               | 6.292351015                                |
| 20.82571926                                | 639.5962294                                    | 0.09160157                                                | 6.173983685                                |
| 29.47990801                                | 764.3727311                                    | 0.064264906                                               | 6.151093354                                |
| 25.02974095                                | 627.8818435                                    | 0.07006494                                                | 6.462273394                                |
| 17.58694114                                | 651.4341057                                    | 0.092646609                                               | 6.209282713                                |
| 16.2677457                                 | 322.0872483                                    | 0.075987568                                               | 5.789724341                                |
| 13.95450135                                | 610.6314508                                    | 0.104091193                                               | 6.096116801                                |
| 18.52061659                                | 719.579235                                     | 0.101135743                                               | 6.391560075                                |
| 14.71359462                                | 533.8221363                                    | 0.1089318                                                 | 6.191214843                                |
| 23.44932849                                | 608.3880458                                    | 0.074457718                                               | 6.600168672                                |
| 23.19896587                                | 568.3519149                                    | 0.084058307                                               | 6.422739709                                |
| 23.57991991                                | 507.4600363                                    | 0.073453371                                               | 6.453543759                                |
| 14.98088737                                | 471.6915639                                    | 0.108441282                                               | 6.212156317                                |
| 20.07497457                                | 1042.25262                                     | 0.101398897                                               | 6.301509454                                |
| 16.18618436                                | 1044.829297                                    | 0.133145725                                               | 6.521440409                                |
| 14.78699517                                | 589.4219512                                    | 0.092507106                                               | 5.923327819                                |
| 18.85684511                                | 346.1283356                                    | 0.070443514                                               | 6.452831689                                |
| 13.83398808                                | 332.6781033                                    | 0.105744292                                               | 6.228911743                                |
| 26.44916769                                | 316.6814068                                    | 0.055770252                                               | 6.423305681                                |
| 19.20293765                                | 569.1330413                                    | 0.080595926                                               | 6.3330334                                  |
| 28.02018111                                | 662.3392283                                    | 0.070097238                                               | 6.370538317                                |
| 20.708881                                  | 750.0469484                                    | 0.084095601                                               | 6.247051713                                |
| 19.56798232                                | 445.5956284                                    | 0.079591375                                               | 6.288879658                                |
| 20.23253028                                | 570.105217                                     | 0.084728773                                               | 6.334603247                                |
| 13.28480006                                | 392.4385763                                    | 0.109684291                                               | 5.866058522                                |
| 26.8465357                                 | 412.1774383                                    | 0.068540364                                               | 6.149968882                                |
| 15.15578717                                | 538.387574                                     | 0.097964663                                               | 6.146684251                                |
| 25.50418992                                | 695.8283379                                    | 0.07291158                                                | 6.292968726                                |
| 26.53745116                                | 574.0086028                                    | 0.060385839                                               | 6.34659948                                 |
| 18.85735124                                | 431.1489362                                    | 0.076412565                                               | 6.185459058                                |
| 14.58072671                                | 364.8197464                                    | 0.091275467                                               | 6.056245198                                |
| 18.804444                                  | 533.1390977                                    | 0.085560518                                               | 6.164206666                                |
| 15.45678396                                | 426.2569231                                    | 0.093948718                                               | 6.131633344                                |
| 20.89165467                                | 485.1156984                                    | 0.071986505                                               | 6.340899831                                |
| 16.56130034                                | 685.2877386                                    | 0.096406987                                               | 6.323795881                                |
| 20.00891342                                | 650.9696602                                    | 0.08419517                                                | 6.158278447                                |
| 22.99885317                                | 695.7161792                                    | 0.070123282                                               | 6.570647243                                |
| 17.72594073                                | 566.9195923                                    | 0.109531493                                               | 6.196993448                                |
| 23.34007996                                | 1017.077154                                    | 0.08189847                                                | 6.303978848                                |
| 21.76643375                                | 791.352047                                     | 0.081634175                                               | 6.443664483                                |
| 20.52319691                                | 706.4298832                                    | 0.083104875                                               | 6.410929727                                |
| 10.40660151                                | 220.1063291                                    | 0.100865246                                               | 5.923370981                                |
| 17.16591597                                | 646.5235629                                    | 0.103959599                                               | 6.314097773                                |
| 16.24310992                                | 535.3420245                                    | 0.106177547                                               | 6.059942129                                |
| 20.74456105                                | 649.12512                                      | 0.082071245                                               | 6.398771969                                |
| 21.52849148                                | 831.4396449                                    | 0.076563568                                               | 6.320486468                                |
| 11.18787629                                | 420.9499655                                    | 0.115139019                                               | 6.122649699                                |
| 16.41304942                                | 344.2209392                                    | 0.091067269                                               | 6.236271409                                |
| 18.27011639                                | 728.6230769                                    | 0.104601692                                               | 6.312194899                                |
| 20.61849294                                | 398.2632734                                    | 0.085105224                                               | 6.465583424                                |
| 30.11267899                                | 553.4466578                                    | 0.059213836                                               | 6.495114011                                |
| 24.3031106                                 | 389.8198659                                    | 0.062596034                                               | 6.481144908                                |
| 16.67374806                                | 381.2503726                                    | 0.089608676                                               | 6.131313548                                |
| 14.05536635                                | 436.0525876                                    | 0.100650848                                               | 6.112720969                                |
| 16.40881207                                | 466.7964509                                    | 0.102854329                                               | 5.985158637                                |
| 14.54196357                                | 509.3503222                                    | 0.09197491                                                | 6.073518543                                |
| 26.6933626                                 | 646.8289867                                    | 0.065044076                                               | 6.422201854                                |
| 33.75770559                                | 1003.223731                                    | 0.063269804                                               | 6.414653819                                |
| 23.95239898                                | 500.1089494                                    | 0.081095946                                               | 6.418166168                                |
| 16.92149255                                | 603.4086877                                    | 0.101754844                                               | 6.391500344                                |
| 10.29701369                                | 341.2456883                                    | 0.098924966                                               | 6.152411216                                |
| 23.41709352                                | 471.7486675                                    | 0.072192157                                               | 6.464812763                                |
| 5.580711573                                | 328.1723238                                    | 0.178929572                                               | 5.98316605                                 |
| 23.47462873                                | 414.5522013                                    | 0.072577825                                               | 6.521918655                                |
| 18.64932998                                | 457.3088986                                    | 0.085874111                                               | 6.349008467                                |
| 16.89751812                                | 616.9132514                                    | 0.0976552                                                 | 6.116839754                                |
| 14.81470849                                | 655.1920988                                    | 0.106625453                                               | 6.164061541                                |
| 8.499755354                                | 556.5766871                                    | 0.150090331                                               | 5.926900477                                |
| 22.10016437                                | 499.2346767                                    | 0.065100625                                               | 6.282435487                                |
| 22.250215                                  | 467.2216863                                    | 0.073022793                                               | 6.322492432                                |
| 15.60838788                                | 396.6387879                                    | 0.094675115                                               | 6.281026107                                |
| 20.59067496                                | 506.5236673                                    | 0.068644382                                               | 6.325264444                                |
| 25.30204745                                | 1014.167446                                    | 0.094536811                                               | 6.464453068                                |
| 16.57383685                                | 342.8782393                                    | 0.084343006                                               | 6.278835856                                |
| 22.44782336                                | 682.30468                                      | 0.089038678                                               | 6.161816099                                |
| 10.28652186                                | 259.9568345                                    | 0.114044017                                               | 5.966535854                                |
| 12.47776549                                | 563.6782127                                    | 0.126774659                                               | 6.153148601                                |

| log.sigma.1.5.mm.3D_gldm_DependenceNonUniformity | log.sigma.1.5.mm.3D_gldm_GrayLevelNonUniformity | log.sigma.1.5.mm.3D_gldm_SmallDependenceEmphasis |
|--------------------------------------------------|-------------------------------------------------|--------------------------------------------------|
| 517.1460886                                      | 130.33459                                       | 0.452832533                                      |
| 140.715508                                       | 109.4877005                                     | 0.288665255                                      |
| 200.6205997                                      | 179.5254237                                     | 0.283681609                                      |
| 181.7451382                                      | 76.09723644                                     | 0.365559828                                      |
| 422.9738176                                      | 206.8978041                                     | 0.354640808                                      |
| 158.5090909                                      | 46.26060606                                     | 0.438233863                                      |
| 989.4137321                                      | 495.4770837                                     | 0.343198283                                      |
| 752.3848865                                      | 544.7642913                                     | 0.314071142                                      |
| 878.8706555                                      | 354.7373515                                     | 0.372221232                                      |
| 222.4981343                                      | 82.89738806                                     | 0.370963024                                      |
| 271.2718833                                      | 138.8196286                                     | 0.325072002                                      |
| 461.1475054                                      | 174.2876356                                     | 0.382126272                                      |
| 208.1258704                                      | 284.8532405                                     | 0.234974948                                      |
| 322.2055911                                      | 135.4880606                                     | 0.355232807                                      |
| 413.4717742                                      | 148.0544355                                     | 0.38850638                                       |
| 660.2189214                                      | 463.7902194                                     | 0.304792139                                      |
| 274.6247906                                      | 83.63316583                                     | 0.390175054                                      |
| 162.2181671                                      | 159.7785888                                     | 0.260290261                                      |
| 228.9953775                                      | 128.7473035                                     | 0.335667116                                      |
| 1044.037892                                      | 407.7001346                                     | 0.380188705                                      |
| 371.7109788                                      | 394.4583333                                     | 0.257525344                                      |
| 234.9592215                                      | 89.39295644                                     | 0.374692471                                      |
| 184.4316406                                      | 93.40234375                                     | 0.348846294                                      |
| 476.5005667                                      | 229.7812618                                     | 0.343750816                                      |
| 226.8727416                                      | 116.6087981                                     | 0.35237424                                       |
| 529.9953567                                      | 152.2435627                                     | 0.414168996                                      |
| 668.2112589                                      | 226.5199505                                     | 0.399048033                                      |
| 492.2469225                                      | 255.8899348                                     | 0.336877581                                      |
| 115.9888143                                      | 33.96644295                                     | 0.428111484                                      |
| 346.8510224                                      | 213.8033106                                     | 0.328091761                                      |
| 714.2374947                                      | 481.2038672                                     | 0.315712415                                      |
| 312.2179797                                      | 225.3798937                                     | 0.302215806                                      |
| 581.6918551                                      | 240.4239703                                     | 0.354997027                                      |
| 409.146383                                       | 197.5370213                                     | 0.339020561                                      |
| 887.5526794                                      | 323.4886467                                     | 0.385936564                                      |
| 445.012004                                       | 325.2154051                                     | 0.307164332                                      |
| 579.0392368                                      | 377.3052943                                     | 0.313528446                                      |
| 569.0930052                                      | 687.1650843                                     | 0.261729617                                      |
| 242.900813                                       | 113.7837398                                     | 0.348133297                                      |
| 1521.580743                                      | 512.1243466                                     | 0.370382254                                      |
| 397.767926                                       | 274.3006939                                     | 0.290842617                                      |
| 1018.191104                                      | 215.6635635                                     | 0.457606108                                      |
| 712.9775527                                      | 294.4169176                                     | 0.359936076                                      |
| 556.772508                                       | 174.4019293                                     | 0.415893369                                      |
| 238.943662                                       | 107.4741784                                     | 0.356257236                                      |
| 537.2302368                                      | 218.4783242                                     | 0.383285757                                      |
| 848.4739149                                      | 386.5326611                                     | 0.370215368                                      |
| 152.7428243                                      | 95.53501722                                     | 0.328549709                                      |
| 213.2068155                                      | 58.32784959                                     | 0.451859736                                      |
| 225.6715976                                      | 132.4482249                                     | 0.333860565                                      |
| 556.0221876                                      | 187.3098482                                     | 0.399942855                                      |
| 861.2919015                                      | 203.5606645                                     | 0.44253111                                       |
| 979.5                                            | 344.7734929                                     | 0.387870078                                      |
| 203.6666667                                      | 100.7681159                                     | 0.348287975                                      |
| 256.9984962                                      | 113.7954887                                     | 0.354114038                                      |
| 348.2605128                                      | 183.2                                           | 0.332557897                                      |
| 857.9537701                                      | 291.1854141                                     | 0.387874852                                      |
| 564.5083864                                      | 333.3753615                                     | 0.320375224                                      |
| 324.9563107                                      | 138.7536408                                     | 0.372951469                                      |
| 1868.592069                                      | 640.1554387                                     | 0.393592434                                      |
| 259.6840317                                      | 193.4326161                                     | 0.318517375                                      |
| 528.4868914                                      | 218.6689139                                     | 0.385553659                                      |
| 1069.493004                                      | 472.5802384                                     | 0.365988277                                      |
| 1410.514102                                      | 633.5084612                                     | 0.350782045                                      |
| 139.4556962                                      | 79.6835443                                      | 0.320483071                                      |
| 588.736406                                       | 401.4919731                                     | 0.315629218                                      |
| 212.0966258                                      | 138.4555215                                     | 0.326933892                                      |
| 1163.6864                                        | 512.94528                                       | 0.3633003                                        |
| 1272.136418                                      | 448.4328154                                     | 0.407168831                                      |
| 427.7556936                                      | 333.6728778                                     | 0.275142003                                      |
| 228.0777521                                      | 118.2963818                                     | 0.342148547                                      |
| 641.3184149                                      | 448.7412587                                     | 0.314566765                                      |
| 378.515577                                       | 193.9548047                                     | 0.341944397                                      |
| 540.8769367                                      | 133.7640549                                     | 0.439734874                                      |
| 712.0009582                                      | 195.9881827                                     | 0.419590765                                      |
| 258.3159463                                      | 120.2548435                                     | 0.352954511                                      |
| 418.9315526                                      | 241.1594324                                     | 0.337807851                                      |
| 162.0250522                                      | 98.53444676                                     | 0.336482906                                      |
| 326.0626831                                      | 157.0011716                                     | 0.346935724                                      |
| 521.7533134                                      | 152.1380932                                     | 0.414120692                                      |
| 484.1131222                                      | 125.84364                                       | 0.458342809                                      |
| 335.0755976                                      | 145.8916064                                     | 0.382579334                                      |
| 492.5466504                                      | 332.6365861                                     | 0.310965814                                      |
| 527.1060853                                      | 303.9964204                                     | 0.289121176                                      |
| 479.7052071                                      | 176.0766708                                     | 0.374509653                                      |
| 141.7167102                                      | 274.1201044                                     | 0.175212648                                      |
| 468.1027254                                      | 173.0981132                                     | 0.374902664                                      |
| 476.9467542                                      | 235.4668125                                     | 0.351638174                                      |
| 258.5887978                                      | 142.9672131                                     | 0.336950561                                      |
| 315.3397531                                      | 215.9165432                                     | 0.312505862                                      |
| 153.0230061                                      | 195.7177914                                     | 0.246521402                                      |
| 590.0016793                                      | 155.0696893                                     | 0.43315066                                       |
| 1119.809956                                      | 378.4771368                                     | 0.38973004                                       |
| 552.890303                                       | 312.4278788                                     | 0.33053373                                       |
| 990.1571691                                      | 298.7403493                                     | 0.406131008                                      |
| 550.5254237                                      | 323.5049679                                     | 0.34502772                                       |
| 537.9236777                                      | 237.5942492                                     | 0.3618262                                        |
| 189.6475645                                      | 93.2234957                                      | 0.351671389                                      |
| 129.4892086                                      | 95.11270983                                     | 0.286860026                                      |
| 757.0114306                                      | 731.9968826                                     | 0.2774172                                        |

| log.sigma.1.5.mm.3D_gldm_DependenceNonUniformityNormalized | log.sigma.1.5.mm.3D_gldm_DependenceVariance | log.sigma.1.5.mm.3D_gldm_LargeDependenceEmphasis |
|------------------------------------------------------------|---------------------------------------------|--------------------------------------------------|
| 0.243706922                                                | 2.632829094                                 | 8.550424128                                      |
| 0.15049787                                                 | 5.115623552                                 | 17.54973262                                      |
| 0.13078266                                                 | 10.3416858                                  | 27.47718383                                      |
| 0.186023683                                                | 4.010030078                                 | 12.92425793                                      |
| 0.1786207                                                  | 4.707820917                                 | 14.39442568                                      |
| 0.240165289                                                | 1.948861341                                 | 7.636363636                                      |
| 0.175086486                                                | 5.724874718                                 | 16.09644311                                      |
| 0.147295397                                                | 6.335686678                                 | 19.39624119                                      |
| 0.193328345                                                | 3.895693027                                 | 12.28860537                                      |
| 0.20755423                                                 | 2.623158693                                 | 9.951492537                                      |
| 0.179888517                                                | 3.320251321                                 | 12.4801061                                       |
| 0.200063994                                                | 3.585478329                                 | 11.50585683                                      |
| 0.111476096                                                | 9.479825653                                 | 30.14408141                                      |
| 0.187656139                                                | 3.606787312                                 | 12.2813046                                       |
| 0.208403112                                                | 2.937365862                                 | 10.24697581                                      |
| 0.150872697                                                | 6.109519391                                 | 18.76919561                                      |
| 0.230004012                                                | 2.332455129                                 | 8.763819095                                      |
| 0.131563801                                                | 6.965847941                                 | 22.63665856                                      |
| 0.176421708                                                | 3.933734725                                 | 13.46841294                                      |
| 0.200815136                                                | 3.110211949                                 | 10.80419311                                      |
| 0.122920297                                                | 9.260207581                                 | 27.26653439                                      |
| 0.217756461                                                | 2.309609437                                 | 9.135310473                                      |
| 0.180109024                                                | 4.246444702                                 | 13.69726563                                      |
| 0.180015326                                                | 3.727925163                                 | 12.90102002                                      |
| 0.178218964                                                | 4.432165052                                 | 13.96779262                                      |
| 0.22372113                                                 | 2.697303231                                 | 9.281975517                                      |
| 0.206684584                                                | 3.403669187                                 | 10.96659449                                      |
| 0.178221188                                                | 3.592671515                                 | 12.85083273                                      |
| 0.259482806                                                | 1.387865411                                 | 6.50335705                                       |
| 0.168866126                                                | 4.086611822                                 | 14.21226874                                      |
| 0.150112967                                                | 6.79757762                                  | 19.76544767                                      |
| 0.150902842                                                | 5.752258068                                 | 18.21121315                                      |
| 0.18014613                                                 | 4.559735388                                 | 14.04552493                                      |
| 0.174104844                                                | 5.274177275                                 | 15.55234043                                      |
| 0.201533306                                                | 3.655159087                                 | 11.57266122                                      |
| 0.148386797                                                | 6.071520784                                 | 18.91797266                                      |
| 0.155613877                                                | 5.00133058                                  | 16.64848159                                      |
| 0.110267972                                                | 14.15013117                                 | 37.20538655                                      |
| 0.197480336                                                | 2.59837134                                  | 10.42926829                                      |
| 0.209295838                                                | 3.050455585                                 | 10.51004127                                      |
| 0.153341529                                                | 4.835808155                                 | 16.79876638                                      |
| 0.263302587                                                | 1.762135751                                 | 6.817946729                                      |
| 0.195175897                                                | 3.274092693                                 | 11.43087873                                      |
| 0.223783162                                                | 2.868412754                                 | 9.54340836                                       |
| 0.186966872                                                | 3.235687119                                 | 11.74491393                                      |
| 0.19571229                                                 | 3.472729022                                 | 11.55737705                                      |
| 0.185987268                                                | 4.177922725                                 | 13.12801403                                      |
| 0.175364896                                                | 3.76429431                                  | 13.39494834                                      |
| 0.250536798                                                | 2.244711068                                 | 7.81786134                                       |
| 0.166916862                                                | 4.810966003                                 | 15.32544379                                      |
| 0.216435262                                                | 2.61375768                                  | 9.429739198                                      |
| 0.255500416                                                | 1.786582487                                 | 7.065262533                                      |
| 0.217087766                                                | 2.238096164                                 | 8.927748227                                      |
| 0.184480676                                                | 3.144166142                                 | 11.8423913                                       |
| 0.193231952                                                | 3.318573125                                 | 11.62857143                                      |
| 0.178595135                                                | 3.49874451                                  | 12.75282051                                      |
| 0.212102292                                                | 2.575577534                                 | 9.571569839                                      |
| 0.163247075                                                | 4.78496816                                  | 15.67611336                                      |
| 0.197182227                                                | 3.130419926                                 | 11.03033981                                      |
| 0.204687487                                                | 4.381189105                                 | 12.46960237                                      |
| 0.147046451                                                | 7.237031688                                 | 20.77576444                                      |
| 0.197935165                                                | 3.691829595                                 | 11.78127341                                      |
| 0.184745725                                                | 4.479338334                                 | 13.65849024                                      |
| 0.18503399                                                 | 3.826694069                                 | 12.70589007                                      |
| 0.176526198                                                | 3.457516424                                 | 13.01265823                                      |
| 0.152443399                                                | 5.603610958                                 | 17.78663905                                      |
| 0.162650787                                                | 5.562676427                                 | 16.80368098                                      |
| 0.186189824                                                | 4.155943322                                 | 13.06784                                         |
| 0.21719932                                                 | 2.847271618                                 | 9.709578282                                      |
| 0.147603759                                                | 5.284733623                                 | 18.19806763                                      |
| 0.175579486                                                | 4.835278633                                 | 14.75365666                                      |
| 0.149491472                                                | 5.863983352                                 | 18.48717949                                      |
| 0.16608845                                                 | 5.452684824                                 | 16.31461167                                      |
| 0.239432022                                                | 2.37244206                                  | 8.272244356                                      |
| 0.227403692                                                | 2.711452561                                 | 9.166719898                                      |
| 0.192485802                                                | 3.388207649                                 | 11.76453055                                      |
| 0.174846224                                                | 3.734678136                                 | 13.25792988                                      |
| 0.169128447                                                | 4.053360123                                 | 14.16283925                                      |
| 0.191015046                                                | 2.889372785                                 | 11.13942589                                      |
| 0.223066829                                                | 2.498691171                                 | 9.011115861                                      |
| 0.243395235                                                | 2.709054147                                 | 8.667169432                                      |
| 0.186256586                                                | 4.532160879                                 | 13.6459144                                       |
| 0.150671964                                                | 7.63862385                                  | 20.89232181                                      |
| 0.171528176                                                | 3.710991113                                 | 14.00813537                                      |
| 0.196681102                                                | 3.524465175                                 | 11.60926609                                      |
| 0.09250438                                                 | 12.20150454                                 | 41.32767624                                      |
| 0.196269487                                                | 4.27645109                                  | 12.72662474                                      |
| 0.173941194                                                | 4.730891697                                 | 14.72866521                                      |
| 0.176631692                                                | 4.389202425                                 | 14.1079235                                       |
| 0.155723335                                                | 5.551525926                                 | 17.47703704                                      |
| 0.117348931                                                | 8.819684124                                 | 27.94018405                                      |
| 0.247691721                                                | 2.157412754                                 | 7.787573468                                      |
| 0.2160544                                                  | 2.561501598                                 | 9.429480996                                      |
| 0.167542516                                                | 4.472924151                                 | 14.82181818                                      |
| 0.227517732                                                | 2.210447529                                 | 8.488051471                                      |
| 0.160878265                                                | 7.255214907                                 | 19.45821157                                      |
| 0.190956222                                                | 3.633784383                                 | 12.09265176                                      |
| 0.181134255                                                | 3.821908049                                 | 12.94842407                                      |
| 0.15526284                                                 | 5.717509446                                 | 18.04316547                                      |
| 0.131106933                                                | 7.595895699                                 | 23.40526498                                      |

| log.sigma.1.5.mm.3D_gldm_LargeDependenceLowGrayLevelEmphasis | log.sigma.1.5.mm.3D_gldm_SmallDependenceHighGrayLevelEmphasis | log.sigma.1.5.mm.3D_gldm_LargeDependenceHighGrayLevelEmphasis |
|--------------------------------------------------------------|---------------------------------------------------------------|---------------------------------------------------------------|
| 0.009703687                                                  | 445.2432577                                                   | 8559.768143                                                   |
| 0.053712884                                                  | 102.7612018                                                   | 6103.8                                                        |
| 0.096411737                                                  | 89.30283593                                                   | 8137.9309                                                     |
| 0.021838511                                                  | 215.4852576                                                   | 8537.839304                                                   |
| 0.045839005                                                  | 123.7081785                                                   | 5745.694679                                                   |
| 0.016336647                                                  | 263.9679802                                                   | 4314.030303                                                   |
| 0.036642116                                                  | 163.4828708                                                   | 7419.875597                                                   |
| 0.030520057                                                  | 205.2396684                                                   | 12702.05305                                                   |
| 0.025480937                                                  | 187.9241949                                                   | 6460.591069                                                   |
| 0.01915407                                                   | 206.7235631                                                   | 5914.094216                                                   |
| 0.043531333                                                  | 96.05716749                                                   | 3948.869363                                                   |
| 0.017479934                                                  | 270.1964915                                                   | 8589.290239                                                   |
| 0.053952723                                                  | 138.8062748                                                   | 17524.96626                                                   |
| 0.020773634                                                  | 233.7794596                                                   | 8184.711124                                                   |
| 0.015756793                                                  | 276.2185987                                                   | 7422.649698                                                   |
| 0.03285096                                                   | 175.0255236                                                   | 11144.94081                                                   |
| 0.038567141                                                  | 112.5783183                                                   | 2488.892797                                                   |
| 0.051488391                                                  | 115.5436504                                                   | 10453.85239                                                   |
| 0.027577963                                                  | 164.2496105                                                   | 6954.353621                                                   |
| 0.017553057                                                  | 254.5844172                                                   | 7217.319485                                                   |
| 0.075551819                                                  | 98.42152587                                                   | 10074.44213                                                   |
| 0.02889423                                                   | 129.4022507                                                   | 3297.458758                                                   |
| 0.020987255                                                  | 239.3184313                                                   | 9672.117188                                                   |
| 0.0269436                                                    | 180.8454587                                                   | 6540.451077                                                   |
| 0.025593866                                                  | 227.5754923                                                   | 8557.123331                                                   |
| 0.013867963                                                  | 321.7616395                                                   | 6879.894892                                                   |
| 0.019315558                                                  | 250.3670669                                                   | 6751.270028                                                   |
| 0.020939867                                                  | 211.2859377                                                   | 8374.812093                                                   |
| 0.025830245                                                  | 138.9641884                                                   | 2053.116331                                                   |
| 0.023988602                                                  | 192.4433458                                                   | 8873.309153                                                   |
| 0.02919638                                                   | 224.5777308                                                   | 13909.11097                                                   |
| 0.035211606                                                  | 150.9603214                                                   | 9860.057999                                                   |
| 0.02512474                                                   | 214.8749584                                                   | 8400.165067                                                   |
| 0.03050332                                                   | 187.0112112                                                   | 8651.41234                                                    |
| 0.025735288                                                  | 193.6971232                                                   | 5713.160763                                                   |
| 0.043199847                                                  | 143.3999929                                                   | 8698.937312                                                   |
| 0.016664619                                                  | 320.5753999                                                   | 17335.4781                                                    |
| 0.037050043                                                  | 275.4189258                                                   | 37868.48208                                                   |
| 0.018638796                                                  | 193.6323889                                                   | 6384.417073                                                   |
| 0.035400754                                                  | 128.4566921                                                   | 3560.128886                                                   |
| 0.05420253                                                   | 93.44700239                                                   | 5635.27101                                                    |
| 0.03024622                                                   | 150.366994                                                    | 2103.308766                                                   |
| 0.021736762                                                  | 197.7727158                                                   | 6524.549411                                                   |
| 0.016256312                                                  | 266.9675303                                                   | 6422.976688                                                   |
| 0.017396132                                                  | 261.0489344                                                   | 8739.99687                                                    |
| 0.029217392                                                  | 168.3689366                                                   | 5024.555191                                                   |
| 0.025062004                                                  | 211.7900707                                                   | 7331.350723                                                   |
| 0.03669197                                                   | 121.5962006                                                   | 5340.877153                                                   |
| 0.025160826                                                  | 177.9339617                                                   | 3268.041128                                                   |
| 0.031071068                                                  | 180.6515976                                                   | 7998.681953                                                   |
| 0.015573726                                                  | 276.7133935                                                   | 6426.768782                                                   |
| 0.014051167                                                  | 253.9396883                                                   | 4081.450311                                                   |
| 0.022611352                                                  | 160.5432201                                                   | 3906.764184                                                   |
| 0.036712406                                                  | 126.176155                                                    | 4184.674819                                                   |
| 0.024260346                                                  | 182.8032807                                                   | 6106.256391                                                   |
| 0.032563361                                                  | 134.9563657                                                   | 5489.997436                                                   |
| 0.022257134                                                  | 180.78008                                                     | 4670.109518                                                   |
| 0.023815668                                                  | 215.7224709                                                   | 10781.72672                                                   |
| 0.017875301                                                  | 233.6685313                                                   | 7347.174757                                                   |
| 0.019508669                                                  | 274.9320867                                                   | 8427.272538                                                   |
| 0.03097421                                                   | 175.1804879                                                   | 11495.08834                                                   |
| 0.012302018                                                  | 378.1094066                                                   | 11996.10262                                                   |
| 0.018502002                                                  | 284.83722                                                     | 10582.67905                                                   |
| 0.018797798                                                  | 240.8529425                                                   | 9050.291355                                                   |
| 0.066333408                                                  | 68.51989591                                                   | 2860.724051                                                   |
| 0.028773805                                                  | 198.4149813                                                   | 11459.59606                                                   |
| 0.033014839                                                  | 167.7413011                                                   | 9060.087423                                                   |
| 0.021041948                                                  | 225.6371353                                                   | 8623.2032                                                     |
| 0.012208744                                                  | 328.3071916                                                   | 8219.381253                                                   |
| 0.045788521                                                  | 111.8601387                                                   | 7596.479296                                                   |
| 0.047545142                                                  | 111.3830792                                                   | 5143.6097                                                     |
| 0.027107232                                                  | 226.9076863                                                   | 13124.34242                                                   |
| 0.047870672                                                  | 136.3166357                                                   | 6257.236507                                                   |
| 0.017555204                                                  | 236.7108287                                                   | 4714.740151                                                   |
| 0.028589825                                                  | 163.056195                                                    | 3531.960396                                                   |
| 0.034954675                                                  | 128.7621249                                                   | 4521.225037                                                   |
| 0.032795836                                                  | 149.7420104                                                   | 5646.189482                                                   |
| 0.033836236                                                  | 146.7699602                                                   | 6714.458246                                                   |
| 0.023834764                                                  | 172.7677026                                                   | 5683.991213                                                   |
| 0.015825413                                                  | 271.879784                                                    | 5820.347584                                                   |
| 0.009837081                                                  | 453.7299602                                                   | 8664.384113                                                   |
| 0.029762242                                                  | 180.8432521                                                   | 6937.2607                                                     |
| 0.037507755                                                  | 185.3774692                                                   | 12204.33191                                                   |
| 0.043141753                                                  | 95.96684666                                                   | 4846.913114                                                   |
| 0.028556019                                                  | 172.7968939                                                   | 5456.794998                                                   |
| 0.127733585                                                  | 51.71776603                                                   | 13698.27676                                                   |
| 0.035546709                                                  | 150.8819088                                                   | 5258.350943                                                   |
| 0.036401864                                                  | 159.1289355                                                   | 6453.055069                                                   |
| 0.024717388                                                  | 201.6526612                                                   | 8592.455601                                                   |
| 0.027958925                                                  | 195.1043316                                                   | 11439.74123                                                   |
| 0.052968844                                                  | 140.1765359                                                   | 15088.46933                                                   |
| 0.018291165                                                  | 216.1309931                                                   | 3774.943325                                                   |
| 0.022219999                                                  | 176.2689946                                                   | 4456.211846                                                   |
| 0.041433415                                                  | 129.3116493                                                   | 5821.192121                                                   |
| 0.018469795                                                  | 201.8330768                                                   | 4367.649127                                                   |
| 0.020524342                                                  | 347.5349086                                                   | 19209.41467                                                   |
| 0.039483352                                                  | 120.782156                                                    | 4177.227547                                                   |
| 0.021413442                                                  | 228.3590176                                                   | 9019.649475                                                   |
| 0.07308201                                                   | 68.54155845                                                   | 4832.23741                                                    |
| 0.043741742                                                  | 153.9138326                                                   | 12783.00554                                                   |

| log.sigma.1.5.mm.3D_gldm_SmallDependenceLowGrayLevelEmphasis | log.sigma.1.5.mm.3D_gldm_LowGrayLevelEmphasis | log.sigma.1.5.mm.3D_gldm_DistanceZoneVariabilityNormalized |
|--------------------------------------------------------------|-----------------------------------------------|------------------------------------------------------------|
| 0.001136601                                                  | 0.001735984                                   | 0.996330288                                                |
| 0.002991287                                                  | 0.005097726                                   | 1                                                          |
| 0.002505658                                                  | 0.004953943                                   | 1                                                          |
| 0.002171255                                                  | 0.003204887                                   | 1                                                          |
| 0.004216532                                                  | 0.006953361                                   | 1                                                          |
| 0.002877289                                                  | 0.003933424                                   | 1                                                          |
| 0.001332685                                                  | 0.002840411                                   | 0.989071368                                                |
| 0.0009032                                                    | 0.001973325                                   | 0.997691867                                                |
| 0.00179275                                                   | 0.003087425                                   | 0.998937301                                                |
| 0.002207675                                                  | 0.003376397                                   | 1                                                          |
| 0.002743597                                                  | 0.005148562                                   | 1                                                          |
| 0.00193267                                                   | 0.002834749                                   | 0.995901657                                                |
| 0.001798601                                                  | 0.003169266                                   | 1                                                          |
| 0.001885962                                                  | 0.002995049                                   | 1                                                          |
| 0.001511961                                                  | 0.0024273                                     | 1                                                          |
| 0.001171783                                                  | 0.002385712                                   | 1                                                          |
| 0.004471754                                                  | 0.007212814                                   | 1                                                          |
| 0.001705014                                                  | 0.003453084                                   | 1                                                          |
| 0.001635475                                                  | 0.002997342                                   | 1                                                          |
| 0.001423965                                                  | 0.002404957                                   | 0.998176847                                                |
| 0.001251469                                                  | 0.003327243                                   | 1                                                          |
| 0.003200913                                                  | 0.005096212                                   | 1                                                          |
| 0.001651547                                                  | 0.00261728                                    | 1                                                          |
| 0.001353152                                                  | 0.002703074                                   | 0.996078447                                                |
| 0.002724565                                                  | 0.00382486                                    | 1                                                          |
| 0.001184297                                                  | 0.002044755                                   | 1                                                          |
| 0.001395438                                                  | 0.002443227                                   | 1                                                          |
| 0.001266318                                                  | 0.002319841                                   | 1                                                          |
| 0.004205165                                                  | 0.006298021                                   | 1                                                          |
| 0.001290552                                                  | 0.002431682                                   | 1                                                          |
| 0.000994998                                                  | 0.00200807                                    | 1                                                          |
| 0.001448956                                                  | 0.002803577                                   | 0.990977629                                                |
| 0.001280827                                                  | 0.002443085                                   | 0.998457981                                                |
| 0.001979436                                                  | 0.003294918                                   | 1                                                          |
| 0.001805296                                                  | 0.003180664                                   | 0.994791702                                                |
| 0.001498474                                                  | 0.003110737                                   | 1                                                          |
| 0.000721584                                                  | 0.001410139                                   | 1                                                          |
| 0.000537402                                                  | 0.001265366                                   | 0.997206709                                                |
| 0.00181204                                                   | 0.002933926                                   | 1                                                          |
| 0.002093245                                                  | 0.004301864                                   | 0.996782505                                                |
| 0.002274718                                                  | 0.004685477                                   | 1                                                          |
| 0.004250567                                                  | 0.006659148                                   | 0.998067635                                                |
| 0.001365017                                                  | 0.00260945                                    | 1                                                          |
| 0.001684969                                                  | 0.002711848                                   | 1                                                          |
| 0.001720334                                                  | 0.00260682                                    | 1                                                          |
| 0.001758348                                                  | 0.00332376                                    | 1                                                          |
| 0.001273082                                                  | 0.00251513                                    | 0.998931624                                                |
| 0.0027469                                                    | 0.004598296                                   | 1                                                          |
| 0.004995821                                                  | 0.006642989                                   | 1                                                          |
| 0.001636297                                                  | 0.002946334                                   | 1                                                          |
| 0.001707567                                                  | 0.002649863                                   | 0.9982684                                                  |
| 0.001541311                                                  | 0.002655231                                   | 0.998847263                                                |
| 0.001901787                                                  | 0.003440118                                   | 1                                                          |
| 0.002854869                                                  | 0.004767601                                   | 1                                                          |
| 0.002009558                                                  | 0.00330929                                    | 1                                                          |
| 0.002747308                                                  | 0.004390003                                   | 1                                                          |
| 0.001903541                                                  | 0.00330985                                    | 0.996657391                                                |
| 0.000944469                                                  | 0.001996742                                   | 1                                                          |
| 0.001502301                                                  | 0.002497214                                   | 1                                                          |
| 0.000918378                                                  | 0.001873842                                   | 0.997045069                                                |
| 0.001536222                                                  | 0.002797169                                   | 1                                                          |
| 0.000941505                                                  | 0.001555227                                   | 1                                                          |
| 0.000849268                                                  | 0.001703692                                   | 0.991521985                                                |
| 0.000901844                                                  | 0.001877084                                   | 0.98326759                                                 |
| 0.004241707                                                  | 0.007726577                                   | 1                                                          |
| 0.001041752                                                  | 0.002171263                                   | 0.992372347                                                |
| 0.001921423                                                  | 0.003234161                                   | 1                                                          |
| 0.001223638                                                  | 0.002256978                                   | 0.992063618                                                |
| 0.000880761                                                  | 0.001628299                                   | 1                                                          |
| 0.001761139                                                  | 0.003588382                                   | 1                                                          |
| 0.004044071                                                  | 0.006207334                                   | 1                                                          |
| 0.000979599                                                  | 0.001980667                                   | 0.991780962                                                |
| 0.00290978                                                   | 0.005010873                                   | 1                                                          |
| 0.002198345                                                  | 0.003391823                                   | 1                                                          |
| 0.0025697                                                    | 0.004484626                                   | 0.994691478                                                |
| 0.002754173                                                  | 0.00472169                                    | 1                                                          |
| 0.00161114                                                   | 0.003232272                                   | 1                                                          |
| 0.004037951                                                  | 0.005494521                                   | 1                                                          |
| 0.001880704                                                  | 0.003248359                                   | 0.996960493                                                |
| 0.001469018                                                  | 0.002517418                                   | 1                                                          |
| 0.001167619                                                  | 0.001754703                                   | 1                                                          |
| 0.002368806                                                  | 0.003751822                                   | 1                                                          |
| 0.00142839                                                   | 0.002647496                                   | 1                                                          |
| 0.001538782                                                  | 0.003801669                                   | 1                                                          |
| 0.002441292                                                  | 0.004058374                                   | 0.998082456                                                |
| 0.001605564                                                  | 0.004279584                                   | 1                                                          |
| 0.00288325                                                   | 0.004675924                                   | 1                                                          |
| 0.002029349                                                  | 0.003643766                                   | 1                                                          |
| 0.001604017                                                  | 0.002726447                                   | 1                                                          |
| 0.001227145                                                  | 0.002322227                                   | 1                                                          |
| 0.001279398                                                  | 0.00267976                                    | 0.988024387                                                |
| 0.001898821                                                  | 0.003180709                                   | 0.994979111                                                |
| 0.001772299                                                  | 0.003229135                                   | 0.993013186                                                |
| 0.002645853                                                  | 0.004559523                                   | 1                                                          |
| 0.001517056                                                  | 0.002824818                                   | 0.999009901                                                |
| 0.000839348                                                  | 0.00152456                                    | 0.995356062                                                |
| 0.002765202                                                  | 0.004939574                                   | 1                                                          |
| 0.002772276                                                  | 0.003774009                                   | 1                                                          |
| 0.003404307                                                  | 0.006572267                                   | 1                                                          |
| 0.000892657                                                  | 0.002220421                                   | 0.997660822                                                |

| log.sigma.1.5.mm.3D_gldzm_LowIntensityEmphasis | log.sigma.1.5.mm.3D_gldzm_LargeDistanceEmphasis | log.sigma.1.5.mm.3D_gldzm_HighIntensitySmallDistanceEmphasis |
|------------------------------------------------|-------------------------------------------------|--------------------------------------------------------------|
| 0.002361126                                    | 1.005514706                                     | 983.6410846                                                  |
| 0.009683171                                    | 1                                               | 361.8255034                                                  |
| 0.008298911                                    | 1                                               | 323.4772727                                                  |
| 0.005522221                                    | 1                                               | 596.7443609                                                  |
| 0.011903985                                    | 1                                               | 352.9235737                                                  |
| 0.006059593                                    | 1                                               | 603.2676923                                                  |
| 0.003738896                                    | 1.016483516                                     | 477.1964286                                                  |
| 0.002798245                                    | 1.003466205                                     | 659.9718371                                                  |
| 0.004591342                                    | 1.001594896                                     | 507.9080276                                                  |
| 0.005509198                                    | 1                                               | 563.6371681                                                  |
| 0.008062337                                    | 1                                               | 296.1727273                                                  |
| 0.004760445                                    | 1.006160164                                     | 714.2209959                                                  |
| 0.007583763                                    | 1                                               | 593.3088889                                                  |
| 0.005040914                                    | 1                                               | 658.2681481                                                  |
| 0.003655616                                    | 1                                               | 715.5684695                                                  |
| 0.003710155                                    | 1                                               | 578.6445825                                                  |
| 0.010625849                                    | 1                                               | 287.4677716                                                  |
| 0.006528049                                    | 1                                               | 447.4866469                                                  |
| 0.004620351                                    | 1                                               | 489.5505155                                                  |
| 0.003555555                                    | 1.002737226                                     | 672.9402372                                                  |
| 0.004820376                                    | 1                                               | 382.1197098                                                  |
| 0.007773375                                    | 1                                               | 348.6575053                                                  |
| 0.004411497                                    | 1                                               | 689.074813                                                   |
| 0.003760443                                    | 1.00589391                                      | 527.0994597                                                  |
| 0.00722134                                     | 1                                               | 649.6369168                                                  |
| 0.00269722                                     | 1                                               | 781.8397493                                                  |
| 0.003327359                                    | 1                                               | 630.8044229                                                  |
| 0.003591587                                    | 1                                               | 631.5411765                                                  |
| 0.008896835                                    | 1                                               | 326.2863436                                                  |
| 0.003809377                                    | 1                                               | 587.258597                                                   |
| 0.003056459                                    | 1                                               | 716.409957                                                   |
| 0.004686515                                    | 1.013595166                                     | 499.1412387                                                  |
| 0.00343491                                     | 1.002314815                                     | 606.9955633                                                  |
| 0.005513191                                    | 1                                               | 558.1762065                                                  |
| 0.004456671                                    | 1.007832898                                     | 506.8793734                                                  |
| 0.00472409                                     | 1                                               | 472.740519                                                   |
| 0.002241015                                    | 1                                               | 1026.1668                                                    |
| 0.001999824                                    | 1.004195804                                     | 1058.188811                                                  |
| 0.004767095                                    | 1                                               | 561.0121704                                                  |
| 0.00546076                                     | 1.004834032                                     | 348.0182082                                                  |
| 0.007561932                                    | 1                                               | 321.9260143                                                  |
| 0.008690218                                    | 1.002901354                                     | 324.7768375                                                  |
| 0.003639691                                    | 1                                               | 553.5712366                                                  |
| 0.003847732                                    | 1                                               | 643.5607477                                                  |
| 0.004469629                                    | 1                                               | 741.1237721                                                  |
| 0.004458627                                    | 1                                               | 443.7674419                                                  |
| 0.0033587                                      | 1.001603421                                     | 572.9985302                                                  |
| 0.008038104                                    | 1                                               | 373.3022508                                                  |
| 0.010044592                                    | 1                                               | 400.9483146                                                  |
| 0.004706971                                    | 1                                               | 543.7659138                                                  |
| 0.004000639                                    | 1.002599653                                     | 695.1553293                                                  |
| 0.003313746                                    | 1.001730104                                     | 571.6326413                                                  |
| 0.004694364                                    | 1                                               | 417.1461303                                                  |
| 0.007787957                                    | 1                                               | 369.6043165                                                  |
| 0.005270642                                    | 1                                               | 522.8579439                                                  |
| 0.007740273                                    | 1                                               | 409.8036212                                                  |
| 0.004629298                                    | 1.005022321                                     | 470.664202                                                   |
| 0.002866446                                    | 1                                               | 673.4740741                                                  |
| 0.003779228                                    | 1                                               | 628.6868687                                                  |
| 0.002267259                                    | 1.004438964                                     | 698.7334772                                                  |
| 0.004612659                                    | 1                                               | 556.4486134                                                  |
| 0.002306169                                    | 1                                               | 988.0918635                                                  |
| 0.002240555                                    | 1.012771392                                     | 784.9650915                                                  |
| 0.002499327                                    | 1.025312184                                     | 685.1731353                                                  |
| 0.012417819                                    | 1                                               | 217.8450704                                                  |
| 0.003243916                                    | 1.011485452                                     | 630.5457504                                                  |
| 0.005588645                                    | 1                                               | 514.8329764                                                  |
| 0.003235427                                    | 1.011952191                                     | 623.7824701                                                  |
| 0.0020799                                      | 1                                               | 809.8237918                                                  |
| 0.006229868                                    | 1                                               | 410.7649824                                                  |
| 0.011014501                                    | 1                                               | 328.4071856                                                  |
| 0.003019465                                    | 1.012379642                                     | 727.8739684                                                  |
| 0.008311265                                    | 1                                               | 400.8495887                                                  |
| 0.004706422                                    | 1                                               | 536.6                                                        |
| 0.005874125                                    | 1.007984032                                     | 389.0883234                                                  |
| 0.007392918                                    | 1                                               | 366.2761194                                                  |
| 0.004628934                                    | 1                                               | 446.3183908                                                  |
| 0.01132829                                     | 1                                               | 442.6282421                                                  |
| 0.005144509                                    | 1.00456621                                      | 498.2104262                                                  |
| 0.003374066                                    | 1                                               | 652.6696833                                                  |
| 0.002397445                                    | 1                                               | 991.8149951                                                  |
| 0.005906917                                    | 1                                               | 478.575                                                      |
| 0.004386921                                    | 1                                               | 598.7037702                                                  |
| 0.00517786                                     | 1                                               | 331.0957129                                                  |
| 0.006150128                                    | 1.002879079                                     | 462.2351248                                                  |
| 0.009229826                                    | 1                                               | 292.4768683                                                  |
| 0.007235268                                    | 1                                               | 403.4274432                                                  |
| 0.005546743                                    | 1                                               | 459.2836946                                                  |
| 0.004561729                                    | 1                                               | 600.7940075                                                  |
| 0.003792348                                    | 1                                               | 626.8833819                                                  |
| 0.005083076                                    | 1.018072289                                     | 575.1792169                                                  |
| 0.004125335                                    | 1.007550336                                     | 499.2160235                                                  |
| 0.004366284                                    | 1.01051709                                      | 453.0173094                                                  |
| 0.007686939                                    | 1                                               | 392.3498322                                                  |
| 0.003579597                                    | 1.001485884                                     | 498.4052749                                                  |
| 0.002331767                                    | 1.006982157                                     | 1013.115981                                                  |
| 0.007393527                                    | 1                                               | 333.2768412                                                  |
| 0.007265376                                    | 1                                               | 657.9755501                                                  |
| 0.011471188                                    | 1                                               | 239.3880597                                                  |
| 0.003133598                                    | 1.003512881                                     | 564.8871487                                                  |

| log.sigma.1.5.mm.3D_gldzm_LowIntensityLargeDistanceEmphasis | log.sigma.1.5.mm.3D_gldzm_HighIntensityEmphasis | log.sigma.1.5.mm.3D_gldzm_DistanceZoneVariability | log.sigma.1.5.mm.3D_gldzm_ZonePercentage |
|-------------------------------------------------------------|-------------------------------------------------|---------------------------------------------------|------------------------------------------|
| 0.002375021                                                 | 984.9549632                                     | 1084.007353                                       | 0.512723845                              |
| 0.009683171                                                 | 361.8255034                                     | 298                                               | 0.318716578                              |
| 0.008298911                                                 | 323.4772727                                     | 484                                               | 0.315514993                              |
| 0.005522221                                                 | 596.7443609                                     | 399                                               | 0.408393004                              |
| 0.011903985                                                 | 352.9235737                                     | 929                                               | 0.392314189                              |
| 0.006059593                                                 | 603.2676923                                     | 325                                               | 0.492424242                              |
| 0.003796394                                                 | 478.8159341                                     | 2160.131868                                       | 0.386480269                              |
| 0.002807076                                                 | 660.4471404                                     | 1727.004622                                       | 0.338880188                              |
| 0.0045929                                                   | 508.3163211                                     | 1879.001063                                       | 0.413770348                              |
| 0.005509198                                                 | 563.6371681                                     | 452                                               | 0.421641791                              |
| 0.008062337                                                 | 296.1727273                                     | 550                                               | 0.364721485                              |
| 0.004884029                                                 | 714.3110883                                     | 970.0082136                                       | 0.422559653                              |
| 0.007583763                                                 | 593.3088889                                     | 450                                               | 0.241028388                              |
| 0.005040914                                                 | 658.2681481                                     | 675                                               | 0.393127548                              |
| 0.003655616                                                 | 715.5684695                                     | 869                                               | 0.438004032                              |
| 0.003710155                                                 | 578.6445825                                     | 1449                                              | 0.331124314                              |
| 0.010625849                                                 | 287.4677716                                     | 543                                               | 0.454773869                              |
| 0.006528049                                                 | 447.4866469                                     | 337                                               | 0.273317113                              |
| 0.004620351                                                 | 489.5505155                                     | 485                                               | 0.373651772                              |
| 0.003644515                                                 | 673.082573                                      | 2188.00365                                        | 0.421619542                              |
| 0.004820376                                                 | 382.1197098                                     | 827                                               | 0.273478836                              |
| 0.007773375                                                 | 348.6575053                                     | 473                                               | 0.438368886                              |
| 0.004411497                                                 | 689.074813                                      | 401                                               | 0.391601563                              |
| 0.003778983                                                 | 527.8634578                                     | 1014.007859                                       | 0.384586324                              |
| 0.00722134                                                  | 649.6369168                                     | 493                                               | 0.387274156                              |
| 0.00269722                                                  | 781.8397493                                     | 1117                                              | 0.471506965                              |
| 0.003327359                                                 | 630.8044229                                     | 1447                                              | 0.447571915                              |
| 0.003591587                                                 | 631.5411765                                     | 1020                                              | 0.36929761                               |
| 0.008896835                                                 | 326.2863436                                     | 227                                               | 0.507829978                              |
| 0.003809377                                                 | 587.258597                                      | 727                                               | 0.353943525                              |
| 0.003056459                                                 | 716.409957                                      | 1627                                              | 0.341950399                              |
| 0.004715124                                                 | 500.9380665                                     | 656.0271903                                       | 0.319961334                              |
| 0.00345404                                                  | 607.0655864                                     | 1294.001543                                       | 0.401362651                              |
| 0.005513191                                                 | 558.1762065                                     | 891                                               | 0.379148936                              |
| 0.004494914                                                 | 507.4715405                                     | 1905.02611                                        | 0.434831971                              |
| 0.00472409                                                  | 472.740519                                      | 1002                                              | 0.33411137                               |
| 0.002241015                                                 | 1026.1668                                       | 1247                                              | 0.335124966                              |
| 0.00200863                                                  | 1058.830769                                     | 1426.005594                                       | 0.277078086                              |
| 0.004767095                                                 | 561.0121704                                     | 493                                               | 0.400813008                              |
| 0.005535331                                                 | 348.3744763                                     | 3093.016113                                       | 0.426822558                              |
| 0.007561932                                                 | 321.9260143                                     | 838                                               | 0.3230532                                |
| 0.008694685                                                 | 325.2736944                                     | 2064.003868                                       | 0.534781484                              |
| 0.003639691                                                 | 553.5712366                                     | 1488                                              | 0.407336436                              |
| 0.003847732                                                 | 643.5607477                                     | 1177                                              | 0.47307074                               |
| 0.004469629                                                 | 741.1237721                                     | 509                                               | 0.39827856                               |
| 0.004458627                                                 | 443.7674419                                     | 1161                                              | 0.42295082                               |
| 0.003364248                                                 | 573.1143773                                     | 1869.001069                                       | 0.410127137                              |
| 0.008038104                                                 | 373.3022508                                     | 311                                               | 0.35706085                               |
| 0.010044592                                                 | 400.9483146                                     | 445                                               | 0.522914219                              |
| 0.004706971                                                 | 543.7659138                                     | 487                                               | 0.360207101                              |
| 0.004006534                                                 | 695.4419411                                     | 1152.001733                                       | 0.449202024                              |
| 0.003315668                                                 | 572.0219146                                     | 1732.001153                                       | 0.514387422                              |
| 0.004694364                                                 | 417.1461303                                     | 1964                                              | 0.435283688                              |
| 0.007787957                                                 | 369.6043165                                     | 417                                               | 0.377717391                              |
| 0.005270642                                                 | 522.8579439                                     | 535                                               | 0.402255639                              |
| 0.007740273                                                 | 409.8036212                                     | 718                                               | 0.368205128                              |
| 0.00464383                                                  | 471.1668527                                     | 1786.010045                                       | 0.443016069                              |
| 0.002866446                                                 | 673.4740741                                     | 1215                                              | 0.351359167                              |
| 0.003779228                                                 | 628.6868687                                     | 693                                               | 0.420509709                              |
| 0.002276515                                                 | 699.329963                                      | 4043.017756                                       | 0.444188849                              |
| 0.004612659                                                 | 556.4486134                                     | 613                                               | 0.347112118                              |
| 0.002306169                                                 | 988.0918635                                     | 1143                                              | 0.428089888                              |
| 0.002261984                                                 | 787.1260111                                     | 2329.085143                                       | 0.405769563                              |
| 0.002572703                                                 | 688.483969                                      | 2913.42187                                        | 0.388692116                              |
| 0.012417819                                                 | 217.8450704                                     | 284                                               | 0.359493671                              |
| 0.005695449                                                 | 631.9257274                                     | 1296.038285                                       | 0.338166753                              |
| 0.005588645                                                 | 514.8329764                                     | 467                                               | 0.358128834                              |
| 0.003263969                                                 | 625.2047809                                     | 2490.079681                                       | 0.4016                                   |
| 0.0020799                                                   | 809.8237918                                     | 2690                                              | 0.459279495                              |
| 0.006229868                                                 | 410.7649824                                     | 851                                               | 0.293650794                              |
| 0.011014501                                                 | 328.4071856                                     | 501                                               | 0.385681293                              |
| 0.003046179                                                 | 729.4786795                                     | 1442.049519                                       | 0.338927739                              |
| 0.008311265                                                 | 400.8495887                                     | 851                                               | 0.37340939                               |
| 0.004706422                                                 | 536.6                                           | 1135                                              | 0.502434706                              |
| 0.005929298                                                 | 389.4271457                                     | 1495.021291                                       | 0.480038326                              |
| 0.007392918                                                 | 366.2761194                                     | 536                                               | 0.399403875                              |
| 0.004628934                                                 | 446.3183908                                     | 870                                               | 0.363105175                              |
| 0.01132829                                                  | 442.6282421                                     | 347                                               | 0.362212944                              |
| 0.005151815                                                 | 498.9238965                                     | 655.0030441                                       | 0.384885764                              |
| 0.003374066                                                 | 652.6696833                                     | 1105                                              | 0.472424113                              |
| 0.002397445                                                 | 991.8149951                                     | 1027                                              | 0.516339869                              |
| 0.005906917                                                 | 478.575                                         | 760                                               | 0.422456921                              |
| 0.004386921                                                 | 598.7037702                                     | 1114                                              | 0.340776996                              |
| 0.00517786                                                  | 331.0957129                                     | 1003                                              | 0.326391149                              |
| 0.006161375                                                 | 462.4193858                                     | 1040.001919                                       | 0.427224272                              |
| 0.009229826                                                 | 292.4768683                                     | 281                                               | 0.183420366                              |
| 0.007235268                                                 | 403.4274432                                     | 1013                                              | 0.424737945                              |
| 0.005546743                                                 | 459.2836946                                     | 1061                                              | 0.386943837                              |
| 0.004561729                                                 | 600.7940075                                     | 534                                               | 0.364754098                              |
| 0.003792348                                                 | 626.8833819                                     | 686                                               | 0.338765432                              |
| 0.005128597                                                 | 576.9909639                                     | 328.0240964                                       | 0.254601227                              |
| 0.004142071                                                 | 500.2944631                                     | 1186.015101                                       | 0.500419815                              |
| 0.004404895                                                 | 454.130149                                      | 2266.056091                                       | 0.440285549                              |
| 0.007686939                                                 | 392.3498322                                     | 1192                                              | 0.361212121                              |
| 0.003581635                                                 | 498.6760773                                     | 2017.000991                                       | 0.463924632                              |
| 0.002343112                                                 | 1014.327386                                     | 1283.013964                                       | 0.376680304                              |
| 0.007393527                                                 | 333.2768412                                     | 1127                                              | 0.400070998                              |
| 0.007265376                                                 | 657.9755501                                     | 409                                               | 0.390639924                              |
| 0.011471188                                                 | 239.3880597                                     | 268                                               | 0.321342926                              |
| 0.003141428                                                 | 565.3495316                                     | 1704.004684                                       | 0.295808798                              |



| log.sigma.1.5.mm.3D_gldzm_IntensityVariabilityNormalized | log.sigma.1.5.mm.3D_gldzm_LowIntensitySmallDistanceEmphasis | log.sigma.1.5.mm.3D_gldzm_IntensityVariability |
|----------------------------------------------------------|-------------------------------------------------------------|------------------------------------------------|
| 0.041399154                                              | 0.002357652                                                 | 45.04227941                                    |
| 0.065582631                                              | 0.009683171                                                 | 19.54362416                                    |
| 0.056118093                                              | 0.008298911                                                 | 27.16115702                                    |
| 0.047229603                                              | 0.005522221                                                 | 18.84461153                                    |
| 0.051576924                                              | 0.011903985                                                 | 47.91496233                                    |
| 0.045604734                                              | 0.006059593                                                 | 14.82153846                                    |
| 0.052747924                                              | 0.003724522                                                 | 115.2014652                                    |
| 0.050140487                                              | 0.002796037                                                 | 86.79318313                                    |
| 0.049037622                                              | 0.004590953                                                 | 92.23976608                                    |
| 0.047762158                                              | 0.005509198                                                 | 21.58849558                                    |
| 0.061897521                                              | 0.008062337                                                 | 34.04363636                                    |
| 0.045556122                                              | 0.004729549                                                 | 44.37166324                                    |
| 0.055525926                                              | 0.007583763                                                 | 24.98666667                                    |
| 0.045249931                                              | 0.005040914                                                 | 30.5437037                                     |
| 0.043064989                                              | 0.003655616                                                 | 37.42347526                                    |
| 0.054644192                                              | 0.003710155                                                 | 79.17943409                                    |
| 0.051154998                                              | 0.010625849                                                 | 27.7771639                                     |
| 0.061293135                                              | 0.006528049                                                 | 20.65578635                                    |
| 0.062608141                                              | 0.004620351                                                 | 30.36494845                                    |
| 0.047023599                                              | 0.003533315                                                 | 103.0757299                                    |
| 0.062665862                                              | 0.004820376                                                 | 51.82466747                                    |
| 0.058208815                                              | 0.007773375                                                 | 27.53276956                                    |
| 0.055839205                                              | 0.004411497                                                 | 22.3915212                                     |
| 0.053074135                                              | 0.003755808                                                 | 54.02946955                                    |
| 0.049311044                                              | 0.00722134                                                  | 24.31034483                                    |
| 0.043607822                                              | 0.00269722                                                  | 48.70993733                                    |
| 0.045011269                                              | 0.003327359                                                 | 65.13130615                                    |
| 0.051043829                                              | 0.003591587                                                 | 52.06470588                                    |
| 0.059519882                                              | 0.008896835                                                 | 13.51101322                                    |
| 0.057251352                                              | 0.003809377                                                 | 41.62173315                                    |
| 0.050474684                                              | 0.003056459                                                 | 82.122311                                      |
| 0.0582324                                                | 0.004679362                                                 | 38.54984894                                    |
| 0.044705456                                              | 0.003430127                                                 | 57.9382716                                     |
| 0.046451546                                              | 0.005513191                                                 | 41.38832772                                    |
| 0.046037263                                              | 0.004447111                                                 | 88.1613577                                     |
| 0.057212919                                              | 0.00472409                                                  | 57.32734531                                    |
| 0.04989103                                               | 0.002241015                                                 | 62.21411387                                    |
| 0.050481686                                              | 0.001997622                                                 | 72.18881119                                    |
| 0.061316854                                              | 0.004767095                                                 | 30.22920892                                    |
| 0.051305334                                              | 0.005442117                                                 | 159.2004512                                    |
| 0.057538405                                              | 0.007561932                                                 | 48.21718377                                    |
| 0.046272013                                              | 0.008689101                                                 | 95.69052224                                    |
| 0.051401354                                              | 0.003639691                                                 | 76.48521505                                    |
| 0.044180841                                              | 0.003847732                                                 | 52.00084962                                    |
| 0.051408633                                              | 0.004469629                                                 | 26.16699411                                    |
| 0.050043734                                              | 0.004458627                                                 | 58.10077519                                    |
| 0.049059872                                              | 0.003357313                                                 | 91.79102084                                    |
| 0.061796301                                              | 0.008038104                                                 | 19.21864952                                    |
| 0.047059715                                              | 0.010044592                                                 | 20.94157303                                    |
| 0.054319915                                              | 0.004706971                                                 | 26.45379877                                    |
| 0.045521718                                              | 0.003999166                                                 | 52.53206239                                    |
| 0.045848749                                              | 0.003313265                                                 | 79.5017301                                     |
| 0.050222747                                              | 0.004694364                                                 | 98.63747454                                    |
| 0.057410187                                              | 0.007787957                                                 | 23.94004796                                    |
| 0.051718054                                              | 0.005270642                                                 | 27.66915888                                    |
| 0.056005152                                              | 0.007740273                                                 | 40.21169916                                    |
| 0.048803835                                              | 0.004625665                                                 | 87.45647321                                    |
| 0.054304053                                              | 0.002866446                                                 | 65.97942387                                    |
| 0.049397292                                              | 0.003779228                                                 | 34.23232323                                    |
| 0.046888878                                              | 0.002264945                                                 | 190.134402                                     |
| 0.051571577                                              | 0.004612659                                                 | 31.61337684                                    |
| 0.047433157                                              | 0.002306169                                                 | 54.21609799                                    |
| 0.047189995                                              | 0.002235197                                                 | 110.8492976                                    |
| 0.048350286                                              | 0.002480983                                                 | 143.2618967                                    |
| 0.068761159                                              | 0.012417819                                                 | 19.52816901                                    |
| 0.052598561                                              | 0.002631032                                                 | 68.69372129                                    |
| 0.05626602                                               | 0.005588645                                                 | 26.27623126                                    |
| 0.048565578                                              | 0.003228291                                                 | 121.8996016                                    |
| 0.050826827                                              | 0.0020799                                                   | 136.7241636                                    |
| 0.065491486                                              | 0.006229868                                                 | 55.73325499                                    |
| 0.054880259                                              | 0.011014501                                                 | 27.49500998                                    |
| 0.051217625                                              | 0.003012786                                                 | 74.47042641                                    |
| 0.047656659                                              | 0.008311265                                                 | 40.55581669                                    |
| 0.043842496                                              | 0.004706422                                                 | 49.76123348                                    |
| 0.046184411                                              | 0.005860332                                                 | 69.41516966                                    |
| 0.055232234                                              | 0.007392918                                                 | 29.60447761                                    |
| 0.05643546                                               | 0.004628934                                                 | 49.09885057                                    |
| 0.054937754                                              | 0.01132829                                                  | 19.06340058                                    |
| 0.058860324                                              | 0.005142682                                                 | 38.67123288                                    |
| 0.04573944                                               | 0.003374066                                                 | 50.54208145                                    |
| 0.042199465                                              | 0.002397445                                                 | 43.33885102                                    |
| 0.045003463                                              | 0.005906917                                                 | 34.20263158                                    |
| 0.052030788                                              | 0.004386921                                                 | 57.96229803                                    |
| 0.065473569                                              | 0.00517786                                                  | 65.66999003                                    |
| 0.046899695                                              | 0.006147317                                                 | 48.86948177                                    |
| 0.085801852                                              | 0.009229826                                                 | 24.11032028                                    |
| 0.046521577                                              | 0.007235268                                                 | 47.12635735                                    |
| 0.049140951                                              | 0.005546743                                                 | 52.13854854                                    |
| 0.054545582                                              | 0.004561729                                                 | 29.12734082                                    |
| 0.058436536                                              | 0.003792348                                                 | 40.08746356                                    |
| 0.071527072                                              | 0.005071696                                                 | 23.74698795                                    |
| 0.04994989                                               | 0.004121151                                                 | 59.54026846                                    |
| 0.047382979                                              | 0.004356631                                                 | 108.1279579                                    |
| 0.054748378                                              | 0.007686939                                                 | 65.26006711                                    |
| 0.051150769                                              | 0.003579088                                                 | 103.2734027                                    |
| 0.045076168                                              | 0.002328928                                                 | 58.10318076                                    |
| 0.052600169                                              | 0.007393527                                                 | 59.28039042                                    |
| 0.050448048                                              | 0.007265376                                                 | 20.63325183                                    |
| 0.068918467                                              | 0.011471188                                                 | 18.47014925                                    |
| 0.058604912                                              | 0.003131164                                                 | 100.0971897                                    |

| log.sigma.1.5.mm.3D_gldzm_HighIntensityLargeDistanceEmphasis | log.sigma.1.5.mm.3D_gldzm_SmallDistanceEmphasis | log.sigma.1.5.mm.3D_gldzm_SumVariance | log.sigma.1.5.mm.3D_gldzm_Homogeneity1 |
|--------------------------------------------------------------|-------------------------------------------------|---------------------------------------|----------------------------------------|
| 990.2104779                                                  | 0.998621324                                     | 3305.375197                           | 0.276086466                            |
| 361.8255034                                                  | 1                                               | 1102.505032                           | 0.394961978                            |
| 323.4772727                                                  | 1                                               | 962.9099992                           | 0.41716822                             |
| 596.7443609                                                  | 1                                               | 2044.691012                           | 0.337012179                            |
| 352.9235737                                                  | 1                                               | 1166.218857                           | 0.335960606                            |
| 603.2676923                                                  | 1                                               | 1795.426664                           | 0.289442075                            |
| 485.293956                                                   | 0.995879121                                     | 1465.610174                           | 0.356680206                            |
| 662.3483536                                                  | 0.999133449                                     | 2166.472536                           | 0.38270044                             |
| 509.9494949                                                  | 0.999601276                                     | 1632.660712                           | 0.328862358                            |
| 563.6371681                                                  | 1                                               | 1824.12472                            | 0.321053657                            |
| 296.1727273                                                  | 1                                               | 946.260056                            | 0.359568854                            |
| 714.6714579                                                  | 0.998459959                                     | 2390.383996                           | 0.315506873                            |
| 593.3088889                                                  | 1                                               | 1947.51525                            | 0.446968663                            |
| 658.2681481                                                  | 1                                               | 2138.553734                           | 0.328787968                            |
| 715.5684695                                                  | 1                                               | 2321.983221                           | 0.309236001                            |
| 578.6445825                                                  | 1                                               | 1935.13783                            | 0.383309752                            |
| 287.4677716                                                  | 1                                               | 821.8091787                           | 0.304003552                            |
| 447.4866469                                                  | 1                                               | 1483.589234                           | 0.411948198                            |
| 489.5505155                                                  | 1                                               | 1612.926718                           | 0.358986119                            |
| 673.6519161                                                  | 0.999315693                                     | 2158.890049                           | 0.318058136                            |
| 382.1197098                                                  | 1                                               | 1194.887123                           | 0.429910919                            |
| 348.6575053                                                  | 1                                               | 1083.351858                           | 0.321368379                            |
| 689.074813                                                   | 1                                               | 2334.432086                           | 0.354452697                            |
| 530.9194499                                                  | 0.998526523                                     | 1644.879241                           | 0.351414573                            |
| 649.6369168                                                  | 1                                               | 2045.705315                           | 0.352409283                            |
| 781.8397493                                                  | 1                                               | 2400.095613                           | 0.299092                               |
| 630.8044229                                                  | 1                                               | 1984.838061                           | 0.313071943                            |
| 631.5411765                                                  | 1                                               | 2118.202149                           | 0.350230594                            |
| 326.2863436                                                  | 1                                               | 955.4351784                           | 0.292133133                            |
| 587.258597                                                   | 1                                               | 1967.501739                           | 0.368109895                            |
| 716.409957                                                   | 1                                               | 2337.841039                           | 0.371463686                            |
| 508.1253776                                                  | 0.996601208                                     | 1705.950558                           | 0.378907574                            |
| 607.345679                                                   | 0.999421296                                     | 1938.051247                           | 0.332166386                            |
| 558.1762065                                                  | 1                                               | 1776.880196                           | 0.349033538                            |
| 509.8402089                                                  | 0.998041775                                     | 1521.931709                           | 0.321682305                            |
| 472.740519                                                   | 1                                               | 1476.88141                            | 0.390129828                            |
| 1026.1668                                                    | 1                                               | 3564.847141                           | 0.365361713                            |
| 1061.398601                                                  | 0.998951049                                     | 3591.998644                           | 0.441087256                            |
| 561.0121704                                                  | 1                                               | 1905.24828                            | 0.332672176                            |
| 349.7995488                                                  | 0.998791492                                     | 1019.72214                            | 0.309110743                            |
| 321.9260143                                                  | 1                                               | 1023.865209                           | 0.37468787                             |
| 327.2611219                                                  | 0.999274662                                     | 903.1857871                           | 0.264345732                            |
| 553.5712366                                                  | 1                                               | 1798.226959                           | 0.333904343                            |
| 643.5607477                                                  | 1                                               | 2108.96072                            | 0.296111431                            |
| 741.1237721                                                  | 1                                               | 2430.576067                           | 0.342990865                            |
| 443.7674419                                                  | 1                                               | 1355.230191                           | 0.338227724                            |
| 573.5777659                                                  | 0.999599145                                     | 1797.51895                            | 0.341555878                            |
| 373.3022508                                                  | 1                                               | 1204.308407                           | 0.357068861                            |
| 400.9483146                                                  | 1                                               | 1194.475142                           | 0.282916449                            |
| 543.7659138                                                  | 1                                               | 1672.48494                            | 0.36909706                             |
| 696.5883882                                                  | 0.999350087                                     | 2215.382244                           | 0.301700791                            |
| 573.5790081                                                  | 0.999567474                                     | 1790.651772                           | 0.274614388                            |
| 417.1461303                                                  | 1                                               | 1294.844824                           | 0.305863852                            |
| 369.6043165                                                  | 1                                               | 1111.186942                           | 0.347261882                            |
| 522.8579439                                                  | 1                                               | 1662.998718                           | 0.336903597                            |
| 409.8036212                                                  | 1                                               | 1302.490363                           | 0.346138692                            |
| 473.1774554                                                  | 0.99874442                                      | 1471.643392                           | 0.313105309                            |
| 673.4740741                                                  | 1                                               | 2267.695075                           | 0.360175659                            |
| 628.6868687                                                  | 1                                               | 2115.955639                           | 0.325729551                            |
| 701.7159063                                                  | 0.998890259                                     | 2277.399686                           | 0.309207235                            |
| 556.4486134                                                  | 1                                               | 1797.603636                           | 0.394300965                            |
| 988.0918635                                                  | 1                                               | 3428.328024                           | 0.324135573                            |
| 795.7696892                                                  | 0.996807152                                     | 2589.548526                           | 0.335942609                            |
| 701.7273034                                                  | 0.993671954                                     | 2277.820752                           | 0.327299535                            |
| 217.8450704                                                  | 1                                               | 622.2086256                           | 0.379865144                            |
| 637.4456355                                                  | 0.997128637                                     | 2096.746262                           | 0.37552877                             |
| 514.8329764                                                  | 1                                               | 1717.708122                           | 0.366615475                            |
| 630.8940239                                                  | 0.997011952                                     | 2108.426052                           | 0.330594208                            |
| 809.8237918                                                  | 1                                               | 2740.28413                            | 0.320269959                            |
| 410.7649824                                                  | 1                                               | 1332.739312                           | 0.392991294                            |
| 328.4071856                                                  | 1                                               | 1047.732944                           | 0.348864873                            |
| 735.8975241                                                  | 0.996905089                                     | 2385.355403                           | 0.378320394                            |
| 400.8495887                                                  | 1                                               | 1180.216231                           | 0.355469606                            |
| 536.6                                                        | 1                                               | 1717.558955                           | 0.278679024                            |
| 390.7824351                                                  | 0.998003992                                     | 1135.450443                           | 0.28628373                             |
| 366.2761194                                                  | 1                                               | 1147.064196                           | 0.335883307                            |
| 446.3183908                                                  | 1                                               | 1345.050498                           | 0.366875925                            |
| 442.6282421                                                  | 1                                               | 1440.00762                            | 0.35584724                             |
| 501.7777778                                                  | 0.998858447                                     | 1603.001055                           | 0.3434035                              |
| 652.6696833                                                  | 1                                               | 2077.416015                           | 0.290711189                            |
| 991.8149951                                                  | 1                                               | 3318.661015                           | 0.283776112                            |
| 478.575                                                      | 1                                               | 1532.872823                           | 0.335780256                            |
| 598.7037702                                                  | 1                                               | 1962.640937                           | 0.385914126                            |
| 331.0957129                                                  | 1                                               | 1052.747396                           | 0.369765633                            |
| 463.1564299                                                  | 0.99928023                                      | 1429.343094                           | 0.317402769                            |
| 292.4768683                                                  | 1                                               | 1048.029979                           | 0.510298829                            |
| 403.4274432                                                  | 1                                               | 1237.017551                           | 0.318541681                            |
| 459.2836946                                                  | 1                                               | 1373.347359                           | 0.351325787                            |
| 600.7940075                                                  | 1                                               | 1962.289733                           | 0.360870478                            |
| 626.8833819                                                  | 1                                               | 2135.439979                           | 0.384932558                            |
| 584.2379518                                                  | 0.995481928                                     | 1823.569691                           | 0.451602419                            |
| 504.6082215                                                  | 0.998112416                                     | 1521.669541                           | 0.290205269                            |
| 458.5815074                                                  | 0.997370727                                     | 1404.805472                           | 0.308119815                            |
| 392.3498322                                                  | 1                                               | 1201.125194                           | 0.360257894                            |
| 499.7592868                                                  | 0.999628529                                     | 1561.459783                           | 0.298721236                            |
| 1019.173002                                                  | 0.998254461                                     | 3382.837576                           | 0.362931056                            |
| 333.2768412                                                  | 1                                               | 1027.750865                           | 0.333587459                            |
| 657.9755501                                                  | 1                                               | 2232.820652                           | 0.339592612                            |
| 239.3880597                                                  | 1                                               | 772.9652937                           | 0.39904781                             |
| 567.1990632                                                  | 0.99912178                                      | 1821.001207                           | 0.418951716                            |

| log.sigma.1.5.mm.3D_glc_m_Homogeneity2 | log.sigma.1.5.mm.3D_glc_m_ClusterShade | log.sigma.1.5.mm.3D_glc_m_MaximumProbability | log.sigma.1.5.mm.3D_glc_m_Ldmn | log.sigma.1.5.mm.3D_glc_m_SumVariance2 |
|----------------------------------------|----------------------------------------|----------------------------------------------|--------------------------------|----------------------------------------|
| 0.191376438                            | -457.1604305                           | 0.016181708                                  | 0.972978013                    | 75.13600384                            |
| 0.317214954                            | -28.22630234                           | 0.053569385                                  | 0.980562114                    | 25.51982588                            |
| 0.345362493                            | -4.552593297                           | 0.086099228                                  | 0.981290181                    | 25.65923587                            |
| 0.257294074                            | -352.4515438                           | 0.030480851                                  | 0.96892527                     | 53.95661861                            |
| 0.252000857                            | -177.0583062                           | 0.038881382                                  | 0.969281704                    | 38.19664344                            |
| 0.199867157                            | -40.49673669                           | 0.018673868                                  | 0.976324129                    | 64.05077267                            |
| 0.275120454                            | -14.03005029                           | 0.042342918                                  | 0.983802674                    | 34.83255971                            |
| 0.306951594                            | -108.5781564                           | 0.052560743                                  | 0.985077645                    | 36.79950517                            |
| 0.24499791                             | -181.1034816                           | 0.023396269                                  | 0.979100967                    | 44.79358227                            |
| 0.234409514                            | -217.1992417                           | 0.021790406                                  | 0.975178538                    | 47.13553917                            |
| 0.273865809                            | -77.79406653                           | 0.027909474                                  | 0.976496295                    | 27.04130503                            |
| 0.23030576                             | -412.2012153                           | 0.023902945                                  | 0.975017037                    | 56.59880689                            |
| 0.383853397                            | -92.94269483                           | 0.098794946                                  | 0.985787077                    | 30.97103081                            |
| 0.245158109                            | -335.9265935                           | 0.027338662                                  | 0.976438579                    | 55.76244581                            |
| 0.225457177                            | -334.1322565                           | 0.025061148                                  | 0.979507247                    | 57.76743286                            |
| 0.306856235                            | -142.5308137                           | 0.051865605                                  | 0.985005099                    | 36.24592672                            |
| 0.21327277                             | -42.9440984                            | 0.017572785                                  | 0.965532425                    | 41.63750665                            |
| 0.338103759                            | -53.79616755                           | 0.065942151                                  | 0.984068701                    | 26.18068949                            |
| 0.27390754                             | -12.18988492                           | 0.039498798                                  | 0.98567246                     | 25.48819522                            |
| 0.230901224                            | -173.5905622                           | 0.022539757                                  | 0.982349903                    | 46.6416107                             |
| 0.358889274                            | -4.494216246                           | 0.074397129                                  | 0.985282343                    | 19.46461248                            |
| 0.231273763                            | -91.84668971                           | 0.021897051                                  | 0.970787861                    | 30.41810327                            |
| 0.272060117                            | -126.5639108                           | 0.03588244                                   | 0.982698887                    | 34.97747971                            |
| 0.267318846                            | -29.38487623                           | 0.028033976                                  | 0.978301178                    | 33.16373563                            |
| 0.271100523                            | -135.3550796                           | 0.038534518                                  | 0.980079864                    | 44.46559823                            |
| 0.21140583                             | -19.11801393                           | 0.022644151                                  | 0.980549638                    | 59.50117613                            |
| 0.228188327                            | -124.4922183                           | 0.023529335                                  | 0.975494469                    | 55.47898513                            |
| 0.267087684                            | -224.7679393                           | 0.029808346                                  | 0.980476644                    | 40.29063181                            |
| 0.198347763                            | -41.75373213                           | 0.018993909                                  | 0.966532204                    | 34.18676691                            |
| 0.286534366                            | -144.1450751                           | 0.037735689                                  | 0.982529647                    | 31.18419628                            |
| 0.29286402                             | -146.9742854                           | 0.048552961                                  | 0.987970954                    | 37.75160024                            |
| 0.302429614                            | -173.9983949                           | 0.047679787                                  | 0.978071286                    | 31.64035275                            |
| 0.249428458                            | -115.4380371                           | 0.026256696                                  | 0.981668407                    | 52.89958316                            |
| 0.270172896                            | -293.1190393                           | 0.044334079                                  | 0.978236955                    | 53.25871431                            |
| 0.237260694                            | -93.33872349                           | 0.026276235                                  | 0.980253895                    | 52.07700508                            |
| 0.313431204                            | -58.39029367                           | 0.056022372                                  | 0.987205286                    | 32.58824409                            |
| 0.286576951                            | -236.7310413                           | 0.039908018                                  | 0.987634663                    | 41.90054039                            |
| 0.377698109                            | -153.5639014                           | 0.096421722                                  | 0.990182604                    | 37.05934026                            |
| 0.24478671                             | -178.1614825                           | 0.027622664                                  | 0.974097979                    | 31.01649345                            |
| 0.219415479                            | -36.3388698                            | 0.017650129                                  | 0.974508712                    | 38.25944731                            |
| 0.295469392                            | -107.0055676                           | 0.041888221                                  | 0.976890977                    | 29.36198583                            |
| 0.17332683                             | -13.45859025                           | 0.01005239                                   | 0.963633628                    | 54.37031459                            |
| 0.249697334                            | -152.5778865                           | 0.026042165                                  | 0.979977456                    | 43.25774435                            |
| 0.210504297                            | -393.7364198                           | 0.019462667                                  | 0.97017932                     | 61.14969223                            |
| 0.258863839                            | -250.8702558                           | 0.026897065                                  | 0.979696596                    | 45.09518423                            |
| 0.254097399                            | -20.59543651                           | 0.029349021                                  | 0.981769372                    | 40.62256341                            |
| 0.258995138                            | -60.34726277                           | 0.03172038                                   | 0.981674445                    | 43.66498769                            |
| 0.271002312                            | -84.08450887                           | 0.034167085                                  | 0.98009527                     | 24.64787386                            |
| 0.194687285                            | -210.4034958                           | 0.020506826                                  | 0.963178681                    | 55.61400127                            |
| 0.288677723                            | -17.37385919                           | 0.040457974                                  | 0.979962937                    | 32.95829502                            |
| 0.212678475                            | -197.9616248                           | 0.024936039                                  | 0.981957036                    | 51.33596601                            |
| 0.184471693                            | -105.3448907                           | 0.012575832                                  | 0.974232921                    | 58.80609525                            |
| 0.215885032                            | -70.71978789                           | 0.017973795                                  | 0.976482434                    | 38.35840662                            |
| 0.260405206                            | 5.624670776                            | 0.031616943                                  | 0.979478398                    | 28.41419089                            |
| 0.252703961                            | -25.06319228                           | 0.031325314                                  | 0.977579415                    | 42.27561051                            |
| 0.259541096                            | -139.8663732                           | 0.028404317                                  | 0.976619303                    | 30.49940045                            |
| 0.226260612                            | -134.2558633                           | 0.020242375                                  | 0.9757977                      | 44.16084694                            |
| 0.278989107                            | -185.2428213                           | 0.037370335                                  | 0.984357479                    | 36.17231562                            |
| 0.239885442                            | -208.4730752                           | 0.025111152                                  | 0.981063712                    | 41.72340317                            |
| 0.225303954                            | -189.8354633                           | 0.024769509                                  | 0.978193857                    | 49.96843335                            |
| 0.321984207                            | -42.71305565                           | 0.066413504                                  | 0.982249667                    | 37.30086907                            |
| 0.240699178                            | -289.7431165                           | 0.027340944                                  | 0.98464804                     | 50.28148548                            |
| 0.253080075                            | -140.2955592                           | 0.030505391                                  | 0.982317079                    | 44.38928129                            |
| 0.240908608                            | -135.7378031                           | 0.03118909                                   | 0.985230703                    | 40.26748597                            |
| 0.297014935                            | -39.03700455                           | 0.038570314                                  | 0.973207541                    | 21.14049371                            |
| 0.297893223                            | -187.7934431                           | 0.044719141                                  | 0.983909108                    | 36.65965883                            |
| 0.288505863                            | -180.9405459                           | 0.047134114                                  | 0.9771168                      | 33.18803384                            |
| 0.246565464                            | -174.0656652                           | 0.026582264                                  | 0.982097776                    | 43.78428325                            |
| 0.233805243                            | -177.3819409                           | 0.022400453                                  | 0.985851726                    | 45.5518998                             |
| 0.313243777                            | -70.9470933                            | 0.056306164                                  | 0.982423372                    | 20.91581281                            |
| 0.265871842                            | -132.4766078                           | 0.036460359                                  | 0.972711607                    | 33.69017613                            |
| 0.300397837                            | -132.7244725                           | 0.045649947                                  | 0.986241978                    | 37.23851211                            |
| 0.27599545                             | -83.97751179                           | 0.038903718                                  | 0.976208361                    | 40.19870439                            |
| 0.191991071                            | -289.0280128                           | 0.015047571                                  | 0.972621693                    | 66.62097517                            |
| 0.196756409                            | -46.12617841                           | 0.016619279                                  | 0.969107603                    | 47.34586699                            |
| 0.250643817                            | -188.1056951                           | 0.028013468                                  | 0.976306787                    | 34.82173806                            |
| 0.283854906                            | 38.5845235                             | 0.033252096                                  | 0.986676574                    | 28.93316822                            |
| 0.27336633                             | -155.8416277                           | 0.043105799                                  | 0.975082901                    | 33.08788351                            |
| 0.256409555                            | -101.6659569                           | 0.025147147                                  | 0.980171514                    | 30.87913306                            |
| 0.203443405                            | -266.0738268                           | 0.017631019                                  | 0.977108759                    | 57.63782843                            |
| 0.199225019                            | -431.8951033                           | 0.017526879                                  | 0.974373897                    | 72.35681165                            |
| 0.257013185                            | -207.2251216                           | 0.02928964                                   | 0.974585803                    | 50.19239392                            |
| 0.311339907                            | -98.29878307                           | 0.048092395                                  | 0.98344833                     | 36.59765012                            |
| 0.284107251                            | -46.7881156                            | 0.030699514                                  | 0.97740812                     | 22.94922513                            |
| 0.234156712                            | -171.0873188                           | 0.023200873                                  | 0.971462035                    | 50.25734195                            |
| 0.453174022                            | -42.12381294                           | 0.131492911                                  | 0.987842625                    | 11.96553318                            |
| 0.235528626                            | -179.8554389                           | 0.028312672                                  | 0.972891418                    | 49.45886084                            |
| 0.268454503                            | -73.05412162                           | 0.032751348                                  | 0.974078398                    | 36.74086018                            |
| 0.279955922                            | -202.6373139                           | 0.037902809                                  | 0.978253622                    | 37.34744394                            |
| 0.307551438                            | -174.8741718                           | 0.050093018                                  | 0.98167624                     | 31.89452247                            |
| 0.38323092                             | 30.27137096                            | 0.090292191                                  | 0.990185924                    | 18.91192001                            |
| 0.19966432                             | -49.87820959                           | 0.015445243                                  | 0.97442384                     | 48.06875542                            |
| 0.221177589                            | -129.2627537                           | 0.017910308                                  | 0.977075005                    | 48.12615969                            |
| 0.277460926                            | -118.8538736                           | 0.035576196                                  | 0.977864949                    | 32.58838442                            |
| 0.2091977                              | -106.0057798                           | 0.015437385                                  | 0.977776325                    | 45.36610004                            |
| 0.28811736                             | -348.8464352                           | 0.055867732                                  | 0.983090055                    | 56.88063959                            |
| 0.246351861                            | -95.87504388                           | 0.026996378                                  | 0.974305645                    | 33.17267749                            |
| 0.258423992                            | -312.2217703                           | 0.036921669                                  | 0.97395462                     | 49.3220037                             |
| 0.32189323                             | -100.2479189                           | 0.053294858                                  | 0.97066037                     | 21.85986896                            |
| 0.347616998                            | 2.440156887                            | 0.070724745                                  | 0.985927083                    | 26.83766139                            |

| log.sigma.1.5.mm.3D_glc_m_Contrast | log.sigma.1.5.mm.3D_glc_m_DifferenceEntropy | log.sigma.1.5.mm.3D_glc_m_InverseVariance | log.sigma.1.5.mm.3D_glc_m_Entropy | log.sigma.1.5.mm.3D_glc_m_Dissimilarity |
|------------------------------------|---------------------------------------------|-------------------------------------------|-----------------------------------|-----------------------------------------|
| 72.88562122                        | 4.108846896                                 | 0.195247378                               | 8.558162666                       | 6.161183354                             |
| 22.46046364                        | 3.242393663                                 | 0.310911504                               | 6.727162656                       | 3.228229243                             |
| 21.2355621                         | 3.234118874                                 | 0.312554912                               | 6.85978963                        | 3.134188604                             |
| 47.36764215                        | 3.72941321                                  | 0.259843435                               | 7.757312054                       | 4.701167197                             |
| 36.29480992                        | 3.635078625                                 | 0.251027703                               | 7.650547914                       | 4.302404236                             |
| 50.70687955                        | 3.828295348                                 | 0.205158904                               | 7.786591959                       | 5.218213663                             |
| 29.40978762                        | 3.508299964                                 | 0.270794255                               | 7.677902072                       | 3.873607143                             |
| 31.61972532                        | 3.466238191                                 | 0.296138621                               | 7.370009359                       | 3.749418803                             |
| 40.68081384                        | 3.709275232                                 | 0.246332737                               | 8.016838172                       | 4.53079028                              |
| 42.50934124                        | 3.708821239                                 | 0.233614514                               | 7.708235702                       | 4.632431349                             |
| 23.59227265                        | 3.356980048                                 | 0.272998771                               | 7.286756412                       | 3.533970413                             |
| 52.9000916                         | 3.834358786                                 | 0.229073971                               | 7.998404318                       | 5.017669659                             |
| 25.79573511                        | 3.154411565                                 | 0.35476022                                | 6.46689396                        | 3.052704727                             |
| 47.77798612                        | 3.745764518                                 | 0.245102552                               | 7.881007145                       | 4.711426182                             |
| 59.18942404                        | 3.881910068                                 | 0.237819674                               | 8.027053608                       | 5.281325864                             |
| 30.58948625                        | 3.428086555                                 | 0.301477683                               | 7.380361073                       | 3.662614447                             |
| 37.97365079                        | 3.687084211                                 | 0.216221369                               | 7.947591266                       | 4.615672761                             |
| 21.65969453                        | 3.196611685                                 | 0.324910368                               | 6.683502975                       | 3.09643882                              |
| 23.2777039                         | 3.352997003                                 | 0.273824003                               | 7.166380033                       | 3.541868714                             |
| 40.86489039                        | 3.710262678                                 | 0.238158589                               | 8.003623523                       | 4.562680418                             |
| 16.45924767                        | 3.062873796                                 | 0.34404373                                | 6.631778433                       | 2.758434163                             |
| 29.46312758                        | 3.520026855                                 | 0.242860716                               | 7.509128609                       | 4.090302076                             |
| 32.27722514                        | 3.492444857                                 | 0.275104843                               | 7.323013008                       | 3.927209071                             |
| 29.70927372                        | 3.497670283                                 | 0.265262698                               | 7.609851162                       | 3.878958951                             |
| 38.22692863                        | 3.56270248                                  | 0.271648741                               | 7.432280381                       | 4.1533935                               |
| 49.00831971                        | 3.83939303                                  | 0.218451715                               | 8.22949676                        | 5.065242698                             |
| 48.10261632                        | 3.812049632                                 | 0.234111731                               | 8.257251038                       | 4.916385625                             |
| 35.22557512                        | 3.542938226                                 | 0.273131093                               | 7.589992494                       | 4.044857112                             |
| 33.52548777                        | 3.589954732                                 | 0.21036025                                | 7.450116737                       | 4.533029308                             |
| 27.93063708                        | 3.413462321                                 | 0.285020909                               | 7.225120934                       | 3.654465533                             |
| 34.04827196                        | 3.498397309                                 | 0.288632153                               | 7.408413046                       | 3.859677213                             |
| 32.39869387                        | 3.452438717                                 | 0.300202097                               | 7.215365942                       | 3.779506392                             |
| 44.55400892                        | 3.745646956                                 | 0.243112574                               | 8.116755045                       | 4.644607644                             |
| 45.58435041                        | 3.698762843                                 | 0.26526765                                | 7.844430874                       | 4.521447098                             |
| 43.9600069                         | 3.766601867                                 | 0.237259872                               | 8.15077682                        | 4.712123938                             |
| 27.01478915                        | 3.350025892                                 | 0.306784714                               | 7.174221437                       | 3.458468274                             |
| 43.12561904                        | 3.55855891                                  | 0.289801194                               | 7.494807652                       | 4.135167233                             |
| 31.1498517                         | 3.308339077                                 | 0.327699715                               | 6.987452193                       | 3.362949968                             |
| 34.65041364                        | 3.554943892                                 | 0.249872362                               | 7.391938504                       | 4.155195411                             |
| 36.46964068                        | 3.690349355                                 | 0.220405937                               | 8.137747204                       | 4.534192758                             |
| 26.66534078                        | 3.386558419                                 | 0.297411332                               | 7.285622144                       | 3.581205067                             |
| 53.1241188                         | 3.953785344                                 | 0.178057533                               | 8.633380262                       | 5.638129558                             |
| 37.1558067                         | 3.639520641                                 | 0.2556098                                 | 7.883504442                       | 4.320848219                             |
| 60.79529839                        | 3.958261096                                 | 0.215123092                               | 8.285965662                       | 5.493823611                             |
| 39.02168691                        | 3.578461416                                 | 0.265243801                               | 7.508532693                       | 4.217269546                             |
| 35.36981228                        | 3.596574151                                 | 0.261270631                               | 7.799886147                       | 4.198701596                             |
| 37.26095269                        | 3.63073676                                  | 0.262261316                               | 7.845281092                       | 4.267971119                             |
| 25.55279129                        | 3.366423388                                 | 0.273763564                               | 6.88935894                        | 3.605770004                             |
| 55.46753688                        | 3.912406854                                 | 0.202102928                               | 7.952316237                       | 5.481750079                             |
| 25.58429488                        | 3.388446133                                 | 0.288433778                               | 7.202857207                       | 3.591568532                             |
| 45.44999343                        | 3.778913557                                 | 0.223900429                               | 8.02724408                        | 4.862112379                             |
| 52.51159292                        | 3.929483257                                 | 0.189747376                               | 8.55023967                        | 5.478916731                             |
| 37.27959082                        | 3.694547483                                 | 0.22390968                                | 8.008031812                       | 4.570022322                             |
| 26.19771086                        | 3.395320655                                 | 0.272962268                               | 7.250001873                       | 3.706043903                             |
| 34.0995253                         | 3.583657014                                 | 0.25752571                                | 7.580622253                       | 4.191716873                             |
| 28.7435023                         | 3.455738411                                 | 0.26727531                                | 7.348920644                       | 3.822846013                             |
| 40.92087254                        | 3.735880775                                 | 0.233276072                               | 8.113731817                       | 4.660959466                             |
| 33.23695968                        | 3.517978958                                 | 0.278367825                               | 7.552379538                       | 3.929299691                             |
| 40.33408929                        | 3.680628305                                 | 0.242835596                               | 7.700164115                       | 4.49532487                              |
| 48.64886873                        | 3.859839008                                 | 0.226133069                               | 8.388060433                       | 5.038611465                             |
| 31.75291743                        | 3.423653859                                 | 0.309486381                               | 7.104182935                       | 3.683479286                             |
| 49.35651643                        | 3.771226788                                 | 0.247481644                               | 7.947638792                       | 4.782593232                             |
| 39.16867274                        | 3.673909243                                 | 0.255488951                               | 7.890492184                       | 4.399527101                             |
| 38.48834919                        | 3.6628942                                   | 0.245599627                               | 7.846486203                       | 4.386387865                             |
| 17.16867445                        | 3.147355578                                 | 0.30557248                                | 6.842856776                       | 3.081301718                             |
| 34.82632584                        | 3.492060997                                 | 0.291731808                               | 7.409357854                       | 3.860781947                             |
| 36.29487079                        | 3.514149525                                 | 0.291437031                               | 7.189506305                       | 3.987693613                             |
| 41.52296193                        | 3.704875936                                 | 0.249552421                               | 7.98606076                        | 4.511680634                             |
| 41.11226787                        | 3.71310983                                  | 0.240218937                               | 8.052295398                       | 4.563628744                             |
| 20.17447079                        | 3.18352961                                  | 0.318009368                               | 6.814845047                       | 3.088661432                             |
| 31.78879126                        | 3.525207448                                 | 0.266263187                               | 7.443254838                       | 4.006484495                             |
| 32.22029378                        | 3.436328765                                 | 0.299185365                               | 7.312376018                       | 3.713349615                             |
| 36.85379269                        | 3.595449897                                 | 0.272880153                               | 7.659843377                       | 4.17148859                              |
| 61.92893454                        | 4.011706802                                 | 0.198594035                               | 8.553385661                       | 5.771967695                             |
| 47.35101346                        | 3.863614274                                 | 0.198096553                               | 8.348650182                       | 5.197722696                             |
| 34.4071377                         | 3.575905235                                 | 0.257803209                               | 7.457144813                       | 4.182998116                             |
| 23.93699761                        | 3.349217819                                 | 0.288659641                               | 7.221824794                       | 3.492663519                             |
| 33.42265949                        | 3.498340022                                 | 0.272590498                               | 7.151256803                       | 3.955920044                             |
| 28.49457916                        | 3.465668923                                 | 0.261245453                               | 7.417406489                       | 3.846933698                             |
| 56.27059623                        | 3.925553148                                 | 0.210810019                               | 8.335082407                       | 5.395583538                             |
| 69.13925239                        | 4.059939989                                 | 0.203075397                               | 8.440060547                       | 5.941458172                             |
| 51.10011644                        | 3.782456489                                 | 0.258768404                               | 7.869655316                       | 4.858745001                             |
| 34.13768721                        | 3.477569355                                 | 0.29747034                                | 7.39397718                        | 3.811832514                             |
| 19.62909647                        | 3.246783832                                 | 0.284235234                               | 7.244043429                       | 3.262000787                             |
| 49.37605349                        | 3.818897598                                 | 0.235381993                               | 8.126905417                       | 4.971685057                             |
| 9.170902247                        | 2.620850119                                 | 0.393483291                               | 5.677642549                       | 1.938980963                             |
| 48.96617201                        | 3.817548139                                 | 0.235119524                               | 8.130196964                       | 4.957882458                             |
| 32.46768758                        | 3.526634549                                 | 0.272452907                               | 7.552986636                       | 3.972302819                             |
| 33.95448048                        | 3.509800708                                 | 0.277136463                               | 7.338812102                       | 3.952028871                             |
| 28.4572143                         | 3.368371641                                 | 0.304053932                               | 7.134200597                       | 3.540634678                             |
| 12.83687295                        | 2.904983342                                 | 0.35748941                                | 6.178560538                       | 2.447083102                             |
| 42.79485106                        | 3.79358295                                  | 0.203726258                               | 8.242790995                       | 4.959908423                             |
| 44.77527451                        | 3.788090294                                 | 0.229557432                               | 8.214506805                       | 4.840121842                             |
| 28.76578816                        | 3.449170133                                 | 0.278791251                               | 7.427989486                       | 3.752075344                             |
| 43.0392993                         | 3.784294298                                 | 0.215364931                               | 8.260355791                       | 4.859490145                             |
| 49.43644437                        | 3.704136341                                 | 0.276916567                               | 7.756376272                       | 4.526652467                             |
| 31.27849095                        | 3.550428488                                 | 0.250939809                               | 7.6694189                         | 4.082294574                             |
| 48.81357516                        | 3.701286943                                 | 0.26154293                                | 7.571761037                       | 4.642298669                             |
| 19.64911397                        | 3.183082653                                 | 0.316889981                               | 6.747969114                       | 3.098097438                             |
| 21.12773451                        | 3.198981269                                 | 0.332625997                               | 6.864458622                       | 3.048860684                             |

| log.sigma.1.5.mm.3D_glmc_DifferenceVariance | log.sigma.1.5.mm.3D_glmc_lfn | log.sigma.1.5.mm.3D_glmc_ldm | log.sigma.1.5.mm.3D_glmc_Correlation | log.sigma.1.5.mm.3D_glmc_Autocorrelation |
|---------------------------------------------|------------------------------|------------------------------|--------------------------------------|------------------------------------------|
| 34.70362185                                 | 0.897341399                  | 0.191376438                  | 0.021204705                          | 957.6596864                              |
| 11.99652145                                 | 0.915864245                  | 0.317214954                  | 0.062562982                          | 342.5140125                              |
| 11.30078259                                 | 0.918139816                  | 0.345362493                  | 0.094794754                          | 304.0941421                              |
| 25.07314386                                 | 0.895966572                  | 0.257294074                  | 0.068382344                          | 610.8272205                              |
| 17.66906767                                 | 0.891816671                  | 0.252000857                  | 0.030845226                          | 363.6689505                              |
| 23.08198275                                 | 0.901688411                  | 0.199867157                  | 0.11859756                           | 542.8469186                              |
| 14.32942052                                 | 0.919532273                  | 0.275120454                  | 0.086045298                          | 449.5422893                              |
| 17.52226737                                 | 0.92764991                   | 0.306951594                  | 0.077181119                          | 641.6060558                              |
| 20.04090258                                 | 0.91006078                   | 0.24499791                   | 0.050374625                          | 497.0496501                              |
| 20.91357437                                 | 0.9024632                    | 0.234409514                  | 0.054978794                          | 549.6974252                              |
| 11.04452237                                 | 0.902392156                  | 0.273865809                  | 0.067051282                          | 300.9946469                              |
| 27.60210862                                 | 0.904701126                  | 0.23030576                   | 0.039332078                          | 705.8433777                              |
| 16.4076818                                  | 0.935905601                  | 0.383853397                  | 0.093512783                          | 574.5233004                              |
| 25.41757345                                 | 0.908054584                  | 0.245158109                  | 0.080313435                          | 636.761012                               |
| 31.11272228                                 | 0.913974584                  | 0.225457177                  | -0.046631046                         | 685.2086715                              |
| 17.11682176                                 | 0.927752399                  | 0.306856235                  | 0.085958669                          | 577.9779205                              |
| 16.53314069                                 | 0.880543509                  | 0.21327277                   | 0.046219146                          | 266.6816562                              |
| 12.02096985                                 | 0.925263463                  | 0.338103759                  | 0.094544254                          | 449.3197933                              |
| 10.69420288                                 | 0.921663308                  | 0.273970754                  | 0.045797067                          | 487.3598735                              |
| 19.9644876                                  | 0.91604355                   | 0.230901224                  | 0.070102637                          | 643.0369262                              |
| 8.809300479                                 | 0.926524738                  | 0.358889274                  | 0.081752499                          | 367.1997683                              |
| 12.65985808                                 | 0.888653677                  | 0.231273763                  | 0.019443083                          | 340.0824674                              |
| 16.80002838                                 | 0.919157436                  | 0.272060117                  | 0.038178653                          | 687.1681882                              |
| 14.59051355                                 | 0.907843562                  | 0.267318846                  | 0.057948854                          | 498.8817371                              |
| 20.81190974                                 | 0.915863602                  | 0.271100523                  | 0.078962218                          | 609.7449295                              |
| 23.17938827                                 | 0.911217924                  | 0.21140583                   | 0.097011823                          | 711.4033204                              |
| 23.79529831                                 | 0.903711854                  | 0.228188327                  | 0.074101168                          | 596.5465892                              |
| 18.78414365                                 | 0.915677958                  | 0.267087684                  | 0.068573163                          | 629.4424923                              |
| 12.9383186                                  | 0.877442626                  | 0.198347763                  | 0.011032184                          | 303.5722009                              |
| 14.52279388                                 | 0.918901072                  | 0.286534366                  | 0.056283174                          | 585.6550821                              |
| 19.09527949                                 | 0.934751804                  | 0.29286402                   | 0.056137451                          | 686.9524611                              |
| 18.0356841                                  | 0.91378381                   | 0.302429614                  | -0.006984556                         | 511.8041333                              |
| 22.7926012                                  | 0.916949789                  | 0.249428458                  | 0.090070345                          | 583.4599918                              |
| 25.04390855                                 | 0.913473409                  | 0.270172896                  | 0.080436298                          | 536.8790912                              |
| 21.66636674                                 | 0.91226031                   | 0.237260694                  | 0.085918998                          | 467.5997401                              |
| 14.99515781                                 | 0.932482367                  | 0.313431204                  | 0.095278398                          | 450.1061932                              |
| 25.94616429                                 | 0.936847096                  | 0.286576951                  | -0.010972495                         | 1017.932504                              |
| 19.75294425                                 | 0.946224248                  | 0.377698109                  | 0.09005791                           | 1023.312156                              |
| 17.33160194                                 | 0.900095417                  | 0.24478671                   | -0.051911994                         | 567.1910752                              |
| 15.84238421                                 | 0.895900638                  | 0.219415479                  | 0.029044489                          | 323.9347368                              |
| 13.73922635                                 | 0.907870825                  | 0.295469392                  | 0.052243503                          | 322.1436137                              |
| 21.17719995                                 | 0.874330749                  | 0.17332683                   | 0.017852439                          | 290.0144463                              |
| 18.36284385                                 | 0.911824491                  | 0.249697334                  | 0.078377343                          | 543.2609515                              |
| 30.48770817                                 | 0.894673285                  | 0.210504297                  | 0.007421207                          | 628.2887639                              |
| 21.10648072                                 | 0.914630404                  | 0.258863839                  | 0.077054426                          | 715.426871                               |
| 17.6500195                                  | 0.915747189                  | 0.254097399                  | 0.068940043                          | 418.7821583                              |
| 18.98038093                                 | 0.916516587                  | 0.258995138                  | 0.080081275                          | 542.6953819                              |
| 12.49232331                                 | 0.911095371                  | 0.271002312                  | -0.011961798                         | 370.6202189                              |
| 25.17795875                                 | 0.879129115                  | 0.194687285                  | 0.008418733                          | 371.5078268                              |
| 12.61879867                                 | 0.911610231                  | 0.288677723                  | 0.12131007                           | 506.16748                                |
| 21.73924111                                 | 0.914278043                  | 0.212678475                  | 0.066135852                          | 658.2726693                              |
| 22.29905682                                 | 0.89466981                   | 0.184471693                  | 0.061238558                          | 543.4583735                              |
| 16.33127496                                 | 0.899927242                  | 0.215885032                  | 0.018443704                          | 401.7337257                              |
| 12.40945811                                 | 0.908666103                  | 0.260405206                  | 0.04357824                           | 347.1096212                              |
| 16.47137353                                 | 0.905958928                  | 0.252703961                  | 0.106014303                          | 505.4331311                              |
| 14.0618347                                  | 0.904247249                  | 0.259541096                  | 0.036140138                          | 401.177806                               |
| 19.0997553                                  | 0.901234303                  | 0.226260612                  | 0.04144852                           | 452.2675583                              |
| 17.7300764                                  | 0.924191805                  | 0.278989107                  | 0.044744775                          | 668.7673486                              |
| 20.04329963                                 | 0.914125567                  | 0.239885442                  | 0.021026029                          | 628.5418892                              |
| 23.1859089                                  | 0.906753959                  | 0.225303954                  | 0.018961304                          | 675.9661922                              |
| 18.12408407                                 | 0.923145273                  | 0.321984207                  | 0.080708082                          | 538.665424                               |
| 26.35321399                                 | 0.924703822                  | 0.240699178                  | 0.015405157                          | 987.3620011                              |
| 19.74374304                                 | 0.917470552                  | 0.253080075                  | 0.06711358                           | 760.0037305                              |
| 19.16953665                                 | 0.923291034                  | 0.240908608                  | 0.027517789                          | 673.1202439                              |
| 7.602374096                                 | 0.89454539                   | 0.297014935                  | 0.100810008                          | 206.1096219                              |
| 19.83964786                                 | 0.926108135                  | 0.297893223                  | 0.02873236                           | 621.213067                               |
| 20.30379021                                 | 0.911872542                  | 0.288505863                  | -0.039874479                         | 514.113403                               |
| 21.09410894                                 | 0.917328203                  | 0.246565464                  | 0.030437327                          | 627.5709571                              |
| 20.20133472                                 | 0.924512584                  | 0.233805243                  | 0.05495685                           | 802.517005                               |
| 10.61060951                                 | 0.918669854                  | 0.313243777                  | 0.021306784                          | 405.7444406                              |
| 15.5765346                                  | 0.898131289                  | 0.265871842                  | 0.034614767                          | 329.5204985                              |
| 18.3655774                                  | 0.93116493                   | 0.300397837                  | 0.075751273                          | 700.3508725                              |
| 19.34744797                                 | 0.907606171                  | 0.27599545                   | 0.046002208                          | 367.5494706                              |
| 28.45559123                                 | 0.895107917                  | 0.191991071                  | 0.041036406                          | 521.5542093                              |
| 20.14653493                                 | 0.885880852                  | 0.196756409                  | 0.005274691                          | 356.6136251                              |
| 16.72573034                                 | 0.904110503                  | 0.250643817                  | 0.013118571                          | 356.9050232                              |
| 11.70014173                                 | 0.926396892                  | 0.283854906                  | 0.094001006                          | 413.5443143                              |
| 17.64757627                                 | 0.905066288                  | 0.27336633                   | 0.00232865                           | 438.5035121                              |
| 13.64495743                                 | 0.910259504                  | 0.256409555                  | 0.04301417                           | 485.9422543                              |
| 26.95461816                                 | 0.90483303                   | 0.203443405                  | 0.017598693                          | 620.47236                                |
| 33.61672681                                 | 0.900660563                  | 0.199225019                  | 0.028529066                          | 961.1227538                              |
| 27.31133902                                 | 0.905999942                  | 0.257013185                  | -0.003363655                         | 466.7649269                              |
| 19.48452195                                 | 0.925582849                  | 0.311339907                  | 0.03948012                           | 584.5269376                              |
| 8.905548785                                 | 0.902952071                  | 0.284107251                  | 0.079622084                          | 331.1428376                              |
| 24.39820528                                 | 0.896852078                  | 0.234156712                  | 0.014112751                          | 439.3090845                              |
| 5.360485675                                 | 0.93600502                   | 0.453174022                  | 0.133706023                          | 321.506324                               |
| 24.18440497                                 | 0.899175095                  | 0.235528626                  | 0.009945174                          | 384.6708863                              |
| 16.63240332                                 | 0.901865546                  | 0.268454503                  | 0.065454891                          | 422.4320399                              |
| 18.2652055                                  | 0.911869165                  | 0.279955922                  | 0.048497432                          | 585.196351                               |
| 15.80381279                                 | 0.920102524                  | 0.307551438                  | 0.060832368                          | 631.224545                               |
| 6.819440155                                 | 0.938692602                  | 0.38323092                   | 0.189267416                          | 539.4158898                              |
| 18.13753759                                 | 0.894750044                  | 0.19966432                   | 0.060270224                          | 467.4504054                              |
| 21.2807362                                  | 0.904411277                  | 0.221177589                  | 0.038995712                          | 433.5381397                              |
| 14.58684162                                 | 0.908638229                  | 0.277460926                  | 0.0653973                            | 373.3435017                              |
| 19.33426158                                 | 0.903400175                  | 0.2091977                    | 0.028871384                          | 477.7304404                              |
| 28.80866723                                 | 0.925778907                  | 0.28811736                   | 0.073027964                          | 975.5179882                              |
| 14.55409245                                 | 0.898288856                  | 0.246351861                  | 0.034473017                          | 324.663094                               |
| 27.08754117                                 | 0.906251595                  | 0.258423992                  | 0.009405307                          | 659.1354075                              |
| 9.964755722                                 | 0.896042522                  | 0.32189323                   | 0.053858634                          | 248.6081012                              |
| 11.79287046                                 | 0.929759611                  | 0.347616998                  | 0.117915784                          | 543.2447557                              |

| log.sigma.1.5.mm.3D_glc_m_SumEntropy | log.sigma.1.5.mm.3D_glc_m_AverageIntensity | log.sigma.1.5.mm.3D_glc_m_Energy | log.sigma.1.5.mm.3D_glc_m_SumSquares | log.sigma.1.5.mm.3D_glc_m_ClusterProminence |
|--------------------------------------|--------------------------------------------|----------------------------------|--------------------------------------|---------------------------------------------|
| 5.038759461                          | 31.36681348                                | 0.004651376                      | 35.43426852                          | 24418.94121                                 |
| 4.155119236                          | 18.63006752                                | 0.017581354                      | 11.9795435                           | 4229.929324                                 |
| 4.198503863                          | 17.55514295                                | 0.020837679                      | 12.01745595                          | 3499.358862                                 |
| 4.745532855                          | 24.8799202                                 | 0.008272545                      | 23.48974387                          | 14025.7765                                  |
| 4.529088345                          | 19.32194662                                | 0.00986185                       | 18.10080585                          | 7792.791631                                 |
| 4.844667301                          | 23.45879099                                | 0.006379791                      | 27.17255884                          | 19376.06365                                 |
| 4.515106198                          | 21.31318912                                | 0.010106016                      | 15.23435176                          | 6087.431298                                 |
| 4.460270535                          | 25.46533053                                | 0.015102187                      | 16.54714256                          | 8006.76771                                  |
| 4.694887228                          | 22.47616281                                | 0.007133296                      | 20.0484091                           | 9335.764274                                 |
| 4.687563487                          | 23.63446422                                | 0.00756735                       | 20.80935173                          | 10002.43925                                 |
| 4.329804727                          | 17.41878669                                | 0.01007044                       | 13.0123942                           | 3459.483993                                 |
| 4.791331743                          | 26.86948429                                | 0.006893133                      | 25.63543564                          | 17717.30898                                 |
| 4.106064694                          | 24.07893784                                | 0.029609162                      | 13.55366715                          | 8626.839968                                 |
| 4.751451806                          | 25.41554361                                | 0.007942164                      | 24.99282176                          | 20482.18475                                 |
| 4.782742973                          | 26.59393107                                | 0.007452419                      | 27.15009505                          | 18906.8662                                  |
| 4.447208866                          | 24.16996356                                | 0.014403806                      | 16.21855279                          | 7945.046433                                 |
| 4.673337322                          | 16.49024202                                | 0.005777847                      | 20.73585384                          | 6318.86355                                  |
| 4.164723478                          | 21.33126714                                | 0.019945739                      | 10.91231045                          | 4392.887194                                 |
| 4.284699161                          | 22.18094112                                | 0.011599906                      | 11.54939511                          | 3104.904994                                 |
| 4.700098214                          | 25.61933714                                | 0.007390147                      | 21.01803712                          | 11972.17876                                 |
| 4.001081461                          | 19.28831229                                | 0.022074351                      | 8.932745951                          | 2489.677817                                 |
| 4.420798155                          | 18.60197408                                | 0.008018587                      | 15.24115508                          | 3987.339571                                 |
| 4.449403295                          | 26.33154529                                | 0.010926739                      | 16.5200767                           | 7569.489513                                 |
| 4.486361385                          | 22.48884664                                | 0.00908417                       | 14.72104658                          | 5241.806046                                 |
| 4.587560841                          | 24.84265437                                | 0.01125885                       | 19.9187933                           | 12085.25887                                 |
| 4.865355849                          | 27.0107497                                 | 0.005969336                      | 26.11669333                          | 17828.33352                                 |
| 4.84849803                           | 24.64860398                                | 0.006317382                      | 25.34368881                          | 13509.5198                                  |
| 4.542740274                          | 25.22499835                                | 0.00959138                       | 18.00670764                          | 9932.573931                                 |
| 4.485042488                          | 17.5828841                                 | 0.007329956                      | 17.51664563                          | 4108.75985                                  |
| 4.363346827                          | 24.29383588                                | 0.012293989                      | 13.81650226                          | 6198.318219                                 |
| 4.424888178                          | 26.4829523                                 | 0.014080566                      | 16.66168116                          | 10545.19463                                 |
| 4.336226813                          | 22.79869561                                | 0.014252019                      | 14.78203557                          | 5911.547071                                 |
| 4.805003855                          | 24.40037                                   | 0.007008382                      | 24.0162942                           | 13360.50242                                 |
| 4.741853679                          | 23.37045653                                | 0.009913393                      | 23.53988499                          | 15195.84324                                 |
| 4.815302905                          | 21.83192599                                | 0.006896438                      | 22.99527069                          | 11979.64408                                 |
| 4.36173762                           | 21.31459025                                | 0.016031141                      | 14.23177195                          | 6407.686773                                 |
| 4.465292677                          | 32.1817456                                 | 0.012399173                      | 20.3139948                           | 14627.85718                                 |
| 4.308972997                          | 32.1697283                                 | 0.026207152                      | 16.45645148                          | 10495.76468                                 |
| 4.377278556                          | 23.99993048                                | 0.009285566                      | 15.02315318                          | 5688.605207                                 |
| 4.643206126                          | 18.28827176                                | 0.005643955                      | 18.31927493                          | 5662.173139                                 |
| 4.323397818                          | 18.11367397                                | 0.01341788                       | 14.09626889                          | 4705.938224                                 |
| 4.906927646                          | 17.40003254                                | 0.003462009                      | 26.94650256                          | 9680.619157                                 |
| 4.657970303                          | 23.44859053                                | 0.007959842                      | 19.00801239                          | 9234.580745                                 |
| 4.875101762                          | 25.38746687                                | 0.005757607                      | 29.06362081                          | 18533.95579                                 |
| 4.596629944                          | 26.88662947                                | 0.009199704                      | 19.95559366                          | 12134.47493                                 |
| 4.606253626                          | 20.62178436                                | 0.00859231                       | 18.16869317                          | 8028.888848                                 |
| 4.64374424                           | 23.45741957                                | 0.009238963                      | 19.52190317                          | 10224.69925                                 |
| 4.168518731                          | 19.47967624                                | 0.01363579                       | 11.81898529                          | 3901.152172                                 |
| 4.800025847                          | 19.62677848                                | 0.006003238                      | 26.4099673                           | 13669.7925                                  |
| 4.422764031                          | 22.61502151                                | 0.012695204                      | 13.51378741                          | 5205.324223                                 |
| 4.736965986                          | 26.00381407                                | 0.006941915                      | 23.12525523                          | 14783.89354                                 |
| 4.941330404                          | 23.57461245                                | 0.004022288                      | 27.16627917                          | 12803.60107                                 |
| 4.626054962                          | 20.30831961                                | 0.006399261                      | 17.53600269                          | 6241.652157                                 |
| 4.326426054                          | 18.81972989                                | 0.010725469                      | 13.3361124                           | 4501.786455                                 |
| 4.614055087                          | 22.63965557                                | 0.00910074                       | 17.83145989                          | 8850.162329                                 |
| 4.371890131                          | 20.2843424                                 | 0.010550961                      | 13.89888954                          | 5242.193678                                 |
| 4.712951833                          | 21.4729787                                 | 0.006190501                      | 19.93368881                          | 8364.276212                                 |
| 4.453693521                          | 26.04261186                                | 0.01182363                       | 16.97779515                          | 7822.64042                                  |
| 4.583862185                          | 25.27441992                                | 0.008173579                      | 19.86715011                          | 9958.243245                                 |
| 4.79041285                           | 26.35467003                                | 0.005752749                      | 24.30429361                          | 11337.76628                                 |
| 4.402456478                          | 23.35647016                                | 0.017525674                      | 16.24246249                          | 8669.374099                                 |
| 4.716298859                          | 31.70366843                                | 0.007906258                      | 23.79439882                          | 15715.97067                                 |
| 4.639279422                          | 27.85120393                                | 0.009334579                      | 20.1277118                           | 10716.74186                                 |
| 4.569157559                          | 26.27308919                                | 0.008614049                      | 18.68972465                          | 10025.99435                                 |
| 4.126879508                          | 14.32153298                                | 0.013569347                      | 9.57729204                           | 2030.853161                                 |
| 4.441724549                          | 25.08310042                                | 0.013525228                      | 17.0759754                           | 8857.270523                                 |
| 4.339535091                          | 22.88259088                                | 0.013834717                      | 16.03496062                          | 7674.574179                                 |
| 4.641848729                          | 25.32778178                                | 0.008078002                      | 20.75363728                          | 10579.7311                                  |
| 4.707482242                          | 28.58714036                                | 0.006583194                      | 20.22742814                          | 10937.34748                                 |
| 4.05779499                           | 20.34343116                                | 0.017574518                      | 9.821558262                          | 3133.69051                                  |
| 4.435252375                          | 18.34725417                                | 0.010420557                      | 16.46758993                          | 5871.829234                                 |
| 4.423439352                          | 26.67089932                                | 0.014686101                      | 16.60843314                          | 10017.46939                                 |
| 4.535286901                          | 19.41767388                                | 0.010312275                      | 18.3449939                           | 9236.31992                                  |
| 4.992048484                          | 23.17458351                                | 0.004186356                      | 31.10979478                          | 16420.40737                                 |
| 4.781938303                          | 19.25144256                                | 0.004768711                      | 22.65265986                          | 8787.26201                                  |
| 4.428125526                          | 19.15212817                                | 0.009701816                      | 16.46387446                          | 7018.295527                                 |
| 4.331707575                          | 20.43748823                                | 0.012147484                      | 12.49875619                          | 5192.236694                                 |
| 4.376096116                          | 21.16641825                                | 0.012640703                      | 15.30406127                          | 7093.0738                                   |
| 4.411148504                          | 22.1900628                                 | 0.009470711                      | 13.70111505                          | 5143.064404                                 |
| 4.863095401                          | 25.29339892                                | 0.005118416                      | 28.06243696                          | 15235.01182                                 |
| 5.00165081                           | 31.40216474                                | 0.005097113                      | 33.77370304                          | 23695.61422                                 |
| 4.714386038                          | 21.87657458                                | 0.00863675                       | 23.80886897                          | 12055.40361                                 |
| 4.441790265                          | 24.3508403                                 | 0.014035128                      | 17.22528796                          | 8432.593185                                 |
| 4.258440734                          | 18.24419754                                | 0.010627871                      | 10.93897978                          | 2088.603144                                 |
| 4.772778058                          | 21.23343576                                | 0.006552991                      | 23.25022648                          | 11027.89958                                 |
| 3.634255017                          | 17.9115057                                 | 0.041333329                      | 5.288452431                          | 1161.501718                                 |
| 4.758813402                          | 19.91997342                                | 0.006772739                      | 23.26948295                          | 10412.60419                                 |
| 4.494408061                          | 20.81072509                                | 0.010578409                      | 16.23034945                          | 7482.874742                                 |
| 4.472433984                          | 24.33004863                                | 0.011502705                      | 16.42089788                          | 8631.85986                                  |
| 4.349702421                          | 25.22087913                                | 0.014431977                      | 14.06887588                          | 6782.225693                                 |
| 3.903814873                          | 23.25634445                                | 0.029358028                      | 7.484486133                          | 2272.616677                                 |
| 4.792594609                          | 21.8268694                                 | 0.004790799                      | 21.36922162                          | 8642.816036                                 |
| 4.769758436                          | 21.05070427                                | 0.005989134                      | 21.93876085                          | 9943.169952                                 |
| 4.410646672                          | 19.5261259                                 | 0.011606078                      | 14.62996048                          | 5782.511476                                 |
| 4.750422705                          | 22.06436219                                | 0.005110909                      | 21.15317419                          | 8003.407995                                 |
| 4.735699034                          | 31.49630353                                | 0.01236353                       | 24.99175972                          | 20250.18047                                 |
| 4.473593781                          | 18.2641478                                 | 0.008769226                      | 16.02307088                          | 5101.44579                                  |
| 4.614491798                          | 25.90380475                                | 0.010030752                      | 23.36327382                          | 13872.47812                                 |
| 4.093177599                          | 15.74971844                                | 0.016657775                      | 10.37724573                          | 2555.52321                                  |
| 4.196292429                          | 23.37409215                                | 0.021529732                      | 11.21468746                          | 4531.753457                                 |

| log.sigma.1.5.mm.3D_glc_m_SumAverage | log.sigma.1.5.mm.3D_glc_m_Lmc2 | log.sigma.1.5.mm.3D_glc_m_Lmc1 | log.sigma.1.5.mm.3D_glc_m_DifferenceAverage | log.sigma.1.5.mm.3D_glc_m_Id |
|--------------------------------------|--------------------------------|--------------------------------|---------------------------------------------|------------------------------|
| 61.8738978                           | 0.7533912                      | -0.0937939                     | 6.161183354                                 | 0.276086466                  |
| 36.97230741                          | 0.727549163                    | -0.106091491                   | 3.228229243                                 | 0.394961978                  |
| 34.81262803                          | 0.705409693                    | -0.096167137                   | 3.134188604                                 | 0.41716822                   |
| 49.3627133                           | 0.817351152                    | -0.132147828                   | 4.701167197                                 | 0.337012179                  |
| 38.11493739                          | 0.625472861                    | -0.06289541                    | 4.302404236                                 | 0.335960606                  |
| 46.45388886                          | 0.870815264                    | -0.167833495                   | 5.218213663                                 | 0.289442075                  |
| 42.34057729                          | 0.538030925                    | -0.043815303                   | 3.873607143                                 | 0.356680206                  |
| 50.608445                            | 0.577184526                    | -0.053914799                   | 3.749418803                                 | 0.38270044                   |
| 44.54285592                          | 0.562222454                    | -0.046330506                   | 4.53079028                                  | 0.328862358                  |
| 46.84162398                          | 0.769578586                    | -0.10953772                    | 4.632431349                                 | 0.321053657                  |
| 34.64817713                          | 0.628671704                    | -0.066594106                   | 3.533970413                                 | 0.359568854                  |
| 53.10029086                          | 0.6806739                      | -0.07486854                    | 5.017669659                                 | 0.315506873                  |
| 47.88433679                          | 0.72876287                     | -0.111450026                   | 3.052704727                                 | 0.446968663                  |
| 50.38892668                          | 0.772583469                    | -0.109104212                   | 4.711426182                                 | 0.328787968                  |
| 52.366375                            | 0.750137553                    | -0.096786177                   | 5.281325864                                 | 0.309236001                  |
| 48.02335286                          | 0.614207397                    | -0.062472401                   | 3.662614447                                 | 0.383309752                  |
| 32.60451034                          | 0.708617751                    | -0.084050717                   | 4.615672761                                 | 0.304003552                  |
| 42.34059657                          | 0.708073707                    | -0.098777086                   | 3.09643882                                  | 0.411948198                  |
| 44.12730057                          | 0.648019121                    | -0.0732251                     | 3.541868714                                 | 0.358986119                  |
| 50.65917732                          | 0.542657997                    | -0.043153161                   | 4.562680418                                 | 0.318058136                  |
| 38.28546099                          | 0.582680746                    | -0.061633745                   | 2.758434163                                 | 0.429910919                  |
| 36.86918795                          | 0.669485191                    | -0.076161626                   | 4.090302076                                 | 0.321368379                  |
| 52.40188677                          | 0.749037405                    | -0.10684688                    | 3.927209071                                 | 0.354452697                  |
| 44.63234011                          | 0.615610676                    | -0.060461552                   | 3.878958951                                 | 0.351414573                  |
| 49.32256076                          | 0.770810228                    | -0.115001973                   | 4.1533935                                   | 0.352409283                  |
| 53.24369539                          | 0.715008424                    | -0.083442305                   | 5.065242698                                 | 0.299092                     |
| 48.77293048                          | 0.663806964                    | -0.068181078                   | 4.916385625                                 | 0.313071943                  |
| 50.12672708                          | 0.637797868                    | -0.067158595                   | 4.044857112                                 | 0.350230594                  |
| 34.83681628                          | 0.826078558                    | -0.143696179                   | 4.533029308                                 | 0.292133133                  |
| 48.3669064                           | 0.631592764                    | -0.067956172                   | 3.654465533                                 | 0.368109895                  |
| 52.38398522                          | 0.620064634                    | -0.062975256                   | 3.859677213                                 | 0.371463686                  |
| 45.25450542                          | 0.665907437                    | -0.077423198                   | 3.779506392                                 | 0.378907574                  |
| 48.22312148                          | 0.671705071                    | -0.071982396                   | 4.644607644                                 | 0.332166386                  |
| 46.25827278                          | 0.731772064                    | -0.093132605                   | 4.521447098                                 | 0.349033538                  |
| 43.15368851                          | 0.610595418                    | -0.05592099                    | 4.712123938                                 | 0.321682305                  |
| 42.36537785                          | 0.646378474                    | -0.073140416                   | 3.458468274                                 | 0.390129828                  |
| 63.81967419                          | 0.6870598                      | -0.081727762                   | 4.135167233                                 | 0.365361713                  |
| 63.93223962                          | 0.693964155                    | -0.090639033                   | 3.362949968                                 | 0.441087256                  |
| 47.6696174                           | 0.678289314                    | -0.079341036                   | 4.155195411                                 | 0.332672176                  |
| 35.97144351                          | 0.441680702                    | -0.026398096                   | 4.534192758                                 | 0.309110743                  |
| 35.8590466                           | 0.615443017                    | -0.063465612                   | 3.581205067                                 | 0.37468787                   |
| 34.04129198                          | 0.538370551                    | -0.038957411                   | 5.638129558                                 | 0.264345732                  |
| 46.55013728                          | 0.601439368                    | -0.055593252                   | 4.320848219                                 | 0.333904343                  |
| 50.12769345                          | 0.706136755                    | -0.080018441                   | 5.493823611                                 | 0.296111431                  |
| 53.43770454                          | 0.740607703                    | -0.101111795                   | 4.217269546                                 | 0.342990865                  |
| 40.86353652                          | 0.662234296                    | -0.071328844                   | 4.198701596                                 | 0.33822724                   |
| 46.52266471                          | 0.597898832                    | -0.05546449                    | 4.267971119                                 | 0.341555878                  |
| 38.51465807                          | 0.703698756                    | -0.093574703                   | 3.605770704                                 | 0.357068861                  |
| 38.54685121                          | 0.838187614                    | -0.140837813                   | 5.481750009                                 | 0.282916449                  |
| 44.91320397                          | 0.708720483                    | -0.09386118                    | 3.591568532                                 | 0.36909706                   |
| 51.25609189                          | 0.661577453                    | -0.069040928                   | 4.862112379                                 | 0.301700791                  |
| 46.55644852                          | 0.609629852                    | -0.053168806                   | 5.478916731                                 | 0.274614388                  |
| 40.07271636                          | 0.502112318                    | -0.035330721                   | 4.570022322                                 | 0.305863852                  |
| 37.23179853                          | 0.707289171                    | -0.091362026                   | 3.706043903                                 | 0.347261882                  |
| 44.87130167                          | 0.740094652                    | -0.099343903                   | 4.191716873                                 | 0.336903597                  |
| 40.03675491                          | 0.616057888                    | -0.062205632                   | 3.822846013                                 | 0.346138692                  |
| 42.4949184                           | 0.562154812                    | -0.045409569                   | 4.660959466                                 | 0.313105309                  |
| 51.69263516                          | 0.617207921                    | -0.061583327                   | 3.929299691                                 | 0.360175659                  |
| 50.12742766                          | 0.693683217                    | -0.081595536                   | 4.49532487                                  | 0.325729551                  |
| 51.9858992                           | 0.525920487                    | -0.038012315                   | 5.038611465                                 | 0.309207235                  |
| 46.35828669                          | 0.746200682                    | -0.108489963                   | 3.683479286                                 | 0.394300965                  |
| 62.83710004                          | 0.683375496                    | -0.076249252                   | 4.782593232                                 | 0.324135573                  |
| 55.08871795                          | 0.557058475                    | -0.046462963                   | 4.399527101                                 | 0.335942609                  |
| 51.87189901                          | 0.512866156                    | -0.038578727                   | 4.386387865                                 | 0.327299535                  |
| 28.64306596                          | 0.672688505                    | -0.085262604                   | 3.081301718                                 | 0.379865144                  |
| 49.82984669                          | 0.623687573                    | -0.064815355                   | 3.860781947                                 | 0.37552877                   |
| 45.3823144                           | 0.747551106                    | -0.106701791                   | 3.987693613                                 | 0.366615475                  |
| 50.08011673                          | 0.550731658                    | -0.04457528                    | 4.511680634                                 | 0.330594208                  |
| 56.61819774                          | 0.556187604                    | -0.044651703                   | 4.563628744                                 | 0.320269959                  |
| 40.27685545                          | 0.553208173                    | -0.052258014                   | 3.088661432                                 | 0.392991294                  |
| 36.27902535                          | 0.701711429                    | -0.087202852                   | 4.006484495                                 | 0.348864873                  |
| 52.88076572                          | 0.616853232                    | -0.063923196                   | 3.713349615                                 | 0.378320394                  |
| 38.29926775                          | 0.710146108                    | -0.086901652                   | 4.17148859                                  | 0.355469606                  |
| 45.62363498                          | 0.702634766                    | -0.076623081                   | 5.771967695                                 | 0.278679024                  |
| 37.76832796                          | 0.584846317                    | -0.048721381                   | 5.197722696                                 | 0.28628373                   |
| 37.7781061                           | 0.717597253                    | -0.091648025                   | 4.182998116                                 | 0.335883307                  |
| 40.6099703                           | 0.612202319                    | -0.063005137                   | 3.492663519                                 | 0.366875925                  |
| 41.88476356                          | 0.758504006                    | -0.111287992                   | 3.955920044                                 | 0.35584724                   |
| 44.06103656                          | 0.629603273                    | -0.065344735                   | 3.846933698                                 | 0.3434035                    |
| 49.80431838                          | 0.708185038                    | -0.080221595                   | 5.395583538                                 | 0.290711189                  |
| 61.97789895                          | 0.767278841                    | -0.099716657                   | 5.941458172                                 | 0.283776112                  |
| 43.21991922                          | 0.757422006                    | -0.102186265                   | 4.858745001                                 | 0.335780256                  |
| 48.32839027                          | 0.675068166                    | -0.07954654                    | 3.811832514                                 | 0.385914126                  |
| 36.34873903                          | 0.491748456                    | -0.037748929                   | 3.262000781                                 | 0.369765633                  |
| 41.90873757                          | 0.689198116                    | -0.076256067                   | 4.971685057                                 | 0.317402769                  |
| 35.82216275                          | 0.591284632                    | -0.076898033                   | 1.938980963                                 | 0.510299829                  |
| 39.21964111                          | 0.695006912                    | -0.0775392                     | 4.957882458                                 | 0.318541681                  |
| 41.05363246                          | 0.652520599                    | -0.070648647                   | 3.972302819                                 | 0.351325787                  |
| 48.34641447                          | 0.714520663                    | -0.092392512                   | 3.952028871                                 | 0.360870478                  |
| 50.21403113                          | 0.668573692                    | -0.080385033                   | 3.540634678                                 | 0.384932558                  |
| 46.38480846                          | 0.651000387                    | -0.086926554                   | 2.447083102                                 | 0.451602419                  |
| 43.17971736                          | 0.634237407                    | -0.060213565                   | 4.959908423                                 | 0.290205269                  |
| 41.60281844                          | 0.542016233                    | -0.041294884                   | 4.840121842                                 | 0.308119815                  |
| 38.59438877                          | 0.596813274                    | -0.057851657                   | 3.752075344                                 | 0.360257894                  |
| 43.68742153                          | 0.547346362                    | -0.042096251                   | 4.859490145                                 | 0.298721236                  |
| 62.40645008                          | 0.702838233                    | -0.084563521                   | 4.526652467                                 | 0.362931056                  |
| 36.01041628                          | 0.563274891                    | -0.048749693                   | 4.082294574                                 | 0.333587459                  |
| 51.34217703                          | 0.82771316                     | -0.142018174                   | 4.642298669                                 | 0.339592612                  |
| 31.49943688                          | 0.69289581                     | -0.092719922                   | 3.098097438                                 | 0.39904781                   |
| 46.55376215                          | 0.540886883                    | -0.049983503                   | 3.048860684                                 | 0.418951716                  |

| log.sigma.1.5.mm.3D_glcm_ClusterTendency | log.sigma.1.5.mm.3D_firstorder_InterquartileRange | log.sigma.1.5.mm.3D_firstorder_Skewness | log.sigma.1.5.mm.3D_firstorder_Uniformity |
|------------------------------------------|---------------------------------------------------|-----------------------------------------|-------------------------------------------|
| 75.13600384                              | 140.9640589                                       | -0.814135088                            | 0.061420636                               |
| 25.51982588                              | 71.49405527                                       | -0.599961329                            | 0.117099145                               |
| 25.65923587                              | 72.53081822                                       | -0.25139496                             | 0.117030915                               |
| 53.95661861                              | 109.6042137                                       | -1.197441184                            | 0.077888676                               |
| 38.19664344                              | 101.2994933                                       | -0.927620422                            | 0.087372383                               |
| 64.05077267                              | 117.7305655                                       | -0.271473698                            | 0.070091827                               |
| 34.83255971                              | 96.67033863                                       | -0.235933188                            | 0.087679541                               |
| 36.79950517                              | 75.36653173                                       | -0.750662341                            | 0.106649235                               |
| 44.79358227                              | 109.4998808                                       | -0.779526604                            | 0.078032853                               |
| 47.13553917                              | 109.618331                                        | -1.015136018                            | 0.077329653                               |
| 27.04130503                              | 96.50826311                                       | -0.656704391                            | 0.092055457                               |
| 56.59880689                              | 112.4820938                                       | -1.272363878                            | 0.075612857                               |
| 30.97103081                              | 51.87283993                                       | -1.01017854                             | 0.152572705                               |
| 55.76244581                              | 107.5714512                                       | -0.871429729                            | 0.078909762                               |
| 57.76743286                              | 111.7325654                                       | -0.983710439                            | 0.074624211                               |
| 36.24592672                              | 74.98581219                                       | -0.916476731                            | 0.105984968                               |
| 41.63750665                              | 125.6827478                                       | -0.219496836                            | 0.070044527                               |
| 26.18068949                              | 64.66355467                                       | -1.011239606                            | 0.12958523                                |
| 25.48819522                              | 87.33540821                                       | -0.405422952                            | 0.099188986                               |
| 46.6416107                               | 105.4680405                                       | -0.755390346                            | 0.078418953                               |
| 19.46461248                              | 63.34898949                                       | -0.141112535                            | 0.130442571                               |
| 30.41810327                              | 109.7649279                                       | -0.749823422                            | 0.082847967                               |
| 34.97747971                              | 91.94055557                                       | -0.905787788                            | 0.091213226                               |
| 33.16373563                              | 97.62512875                                       | -0.404567535                            | 0.086808184                               |
| 44.46559823                              | 91.1565547                                        | -0.842859767                            | 0.09160157                                |
| 59.50117613                              | 129.5042782                                       | -0.183298589                            | 0.064264906                               |
| 55.47898513                              | 118.4400749                                       | -0.445997144                            | 0.07006494                                |
| 40.29063181                              | 90.46709728                                       | -1.140195639                            | 0.092646609                               |
| 34.18676691                              | 115.5646524                                       | -0.271278863                            | 0.075987568                               |
| 31.18419628                              | 81.85846305                                       | -1.16714155                             | 0.104091193                               |
| 37.75160024                              | 80.64457417                                       | -0.876197059                            | 0.101135743                               |
| 31.64035275                              | 76.31864166                                       | -1.294816777                            | 0.1089318                                 |
| 52.89958316                              | 112.7238464                                       | -0.323731569                            | 0.074457718                               |
| 53.25871431                              | 103.1742101                                       | -0.901480625                            | 0.084058307                               |
| 52.07700508                              | 114.9279115                                       | -0.480774441                            | 0.073453371                               |
| 32.58824409                              | 76.14125299                                       | -0.565887484                            | 0.108441282                               |
| 41.90054039                              | 81.45929146                                       | -1.109267233                            | 0.101398897                               |
| 37.05934026                              | 58.32483673                                       | -0.887935232                            | 0.133145725                               |
| 31.01649345                              | 95.93734312                                       | -1.381036038                            | 0.092507106                               |
| 38.25944731                              | 126.5160904                                       | -0.205072026                            | 0.070443514                               |
| 29.36198583                              | 77.18800592                                       | -0.709807365                            | 0.105744292                               |
| 54.37031459                              | 166.7480774                                       | 0.010922799                             | 0.055770252                               |
| 43.25774435                              | 104.7558975                                       | -0.750375703                            | 0.080595926                               |
| 61.14969223                              | 123.9553709                                       | -0.938646971                            | 0.070097238                               |
| 45.09518423                              | 100.54159                                         | -1.27620485                             | 0.084095601                               |
| 40.62256341                              | 106.1348381                                       | -0.171604254                            | 0.079591375                               |
| 43.66498769                              | 98.43802071                                       | -0.379628006                            | 0.084728773                               |
| 24.64787386                              | 78.12171217                                       | -0.95395317                             | 0.109684291                               |
| 55.61400127                              | 127.4702187                                       | -0.672663032                            | 0.068540364                               |
| 32.95829502                              | 83.2476896                                        | -0.519600655                            | 0.097964663                               |
| 51.33596601                              | 115.7994919                                       | -0.732619899                            | 0.07291158                                |
| 58.80609525                              | 148.7157536                                       | -0.309396238                            | 0.060385839                               |
| 38.35840662                              | 114.366107                                        | -0.515065614                            | 0.076412565                               |
| 28.41419089                              | 94.05246925                                       | -0.256243008                            | 0.091275467                               |
| 42.27561051                              | 98.30350447                                       | -0.443110118                            | 0.085560518                               |
| 30.49940045                              | 90.8217411                                        | -1.099365217                            | 0.093948718                               |
| 44.16084694                              | 121.3483543                                       | -0.662646197                            | 0.071986505                               |
| 36.17231562                              | 86.04455996                                       | -0.949836587                            | 0.096406987                               |
| 41.72340317                              | 102.2015619                                       | -0.853020126                            | 0.08419517                                |
| 49.96843335                              | 127.2326736                                       | -0.45350638                             | 0.070123282                               |
| 37.30086907                              | 74.66048789                                       | -0.518602106                            | 0.109531493                               |
| 50.28148548                              | 99.69873857                                       | -1.081911899                            | 0.08189847                                |
| 44.38928129                              | 100.5559921                                       | -0.595278386                            | 0.081634175                               |
| 40.26748597                              | 103.3616743                                       | -0.639237171                            | 0.083104875                               |
| 21.14049371                              | 85.63081002                                       | -0.567709619                            | 0.100865246                               |
| 36.65965883                              | 77.45111895                                       | -0.962400781                            | 0.103959599                               |
| 33.18803384                              | 78.15207911                                       | -1.23706249                             | 0.106177547                               |
| 43.78428325                              | 104.0514832                                       | -0.654272978                            | 0.082071245                               |
| 45.5518998                               | 111.944397                                        | -0.768347769                            | 0.076563568                               |
| 20.91581281                              | 71.32353306                                       | -1.164150006                            | 0.115139019                               |
| 33.69017613                              | 91.30661583                                       | -0.828417134                            | 0.091067269                               |
| 37.23851211                              | 77.13441563                                       | -0.830933444                            | 0.104601692                               |
| 40.19870439                              | 95.52236652                                       | -0.469746878                            | 0.085105224                               |
| 66.62097517                              | 150.4347973                                       | -0.61716982                             | 0.059213836                               |
| 47.34586699                              | 143.9490623                                       | -0.271728367                            | 0.062596034                               |
| 34.82173806                              | 97.40850163                                       | -0.917714004                            | 0.089608676                               |
| 28.93316822                              | 84.45422482                                       | -0.084419086                            | 0.100650848                               |
| 33.08788351                              | 85.25343752                                       | -1.183698584                            | 0.102854329                               |
| 30.87913306                              | 94.27164078                                       | -0.926276167                            | 0.09197491                                |
| 57.67382843                              | 138.7537785                                       | -0.49486703                             | 0.065044076                               |
| 72.35681165                              | 134.9968109                                       | -0.827959927                            | 0.063269804                               |
| 50.19239392                              | 101.686842                                        | -0.817976827                            | 0.081095946                               |
| 36.59765012                              | 77.24198723                                       | -0.656294982                            | 0.101754844                               |
| 22.94922513                              | 89.83341789                                       | -0.56997679                             | 0.098924966                               |
| 50.25734195                              | 118.9007702                                       | -0.710808794                            | 0.072192157                               |
| 11.96553318                              | 43.87701643                                       | -1.761684988                            | 0.178929572                               |
| 49.45886084                              | 121.9553299                                       | -0.597329117                            | 0.072577825                               |
| 36.74086018                              | 98.09313178                                       | -0.659517389                            | 0.085874111                               |
| 37.34744394                              | 85.27305818                                       | -1.290318775                            | 0.0976552                                 |
| 31.89452247                              | 77.57470608                                       | -1.293056847                            | 0.106625453                               |
| 18.91192001                              | 51.08071617                                       | -0.132637297                            | 0.150090331                               |
| 48.06875542                              | 138.5842323                                       | -0.322094901                            | 0.065100625                               |
| 48.12615969                              | 118.7656498                                       | -0.562284857                            | 0.073022793                               |
| 32.58838442                              | 86.57824278                                       | -0.848312127                            | 0.094675115                               |
| 45.36610004                              | 134.4883261                                       | -0.436529408                            | 0.068644382                               |
| 56.88063959                              | 86.69634795                                       | -1.167253766                            | 0.094536811                               |
| 33.17267749                              | 100.4248943                                       | -0.535318969                            | 0.084343006                               |
| 49.3220037                               | 97.14559555                                       | -1.169030483                            | 0.089038678                               |
| 21.85986896                              | 76.76366234                                       | -1.131117104                            | 0.114044017                               |
| 26.83766139                              | 62.4881103                                        | -0.408948349                            | 0.126774659                               |



| log.sigma.1.5.mm.3D_firstorder_MeanAbsoluteDeviation | log.sigma.1.5.mm.3D_firstorder_Energy | log.sigma.1.5.mm.3D_firstorder_RobustMeanAbsoluteDeviation | log.sigma.1.5.mm.3D_firstorder_Median |
|------------------------------------------------------|---------------------------------------|------------------------------------------------------------|---------------------------------------|
| 107.1047159                                          | 46689511.13                           | 64.29765387                                                | 31.50684357                           |
| 58.41996606                                          | 8065066.977                           | 31.41317414                                                | 27.1101284                            |
| 60.11229845                                          | 12740485.22                           | 33.49832408                                                | 17.14630318                           |
| 86.8333183                                           | 14588955.06                           | 50.26975668                                                | 27.61798096                           |
| 77.59644099                                          | 28702842.65                           | 44.92927431                                                | 31.33901024                           |
| 92.19154943                                          | 12099334.09                           | 52.79115278                                                | 29.32581615                           |
| 71.85959035                                          | 60894573.85                           | 42.62341876                                                | 23.19658089                           |
| 68.21949539                                          | 59280133.15                           | 34.97801924                                                | 27.95349979                           |
| 80.6244822                                           | 59885677.97                           | 48.30253704                                                | 34.16837883                           |
| 83.40383709                                          | 15575330.03                           | 49.2176927                                                 | 43.59416008                           |
| 65.30732399                                          | 12313538.86                           | 41.29650409                                                | 24.94867134                           |
| 87.75281142                                          | 40532968.76                           | 49.47151986                                                | 44.44513702                           |
| 53.36544069                                          | 16229130.98                           | 23.64750604                                                | 16.38395882                           |
| 84.93828652                                          | 27333798.21                           | 47.25857577                                                | 31.37478638                           |
| 91.79522239                                          | 36787668.4                            | 50.42052022                                                | 35.09003067                           |
| 65.31607441                                          | 43831850.61                           | 34.9139795                                                 | 20.73966408                           |
| 84.09235073                                          | 14763391.85                           | 55.25535716                                                | 25.22230911                           |
| 54.47578697                                          | 9373334.434                           | 28.38884795                                                | 23.45432091                           |
| 62.65853582                                          | 10093272.53                           | 38.47917686                                                | 25.4389019                            |
| 82.17572978                                          | 76520880.36                           | 47.40801055                                                | 32.35398483                           |
| 51.62177602                                          | 19108198.11                           | 27.86880561                                                | 19.03166866                           |
| 73.0166953                                           | 10957784.88                           | 46.31247629                                                | 33.25180435                           |
| 71.39169252                                          | 11232976.73                           | 40.82181751                                                | 27.14177608                           |
| 70.74038083                                          | 27241211.46                           | 42.98721376                                                | 24.90590668                           |
| 75.69877673                                          | 18038367.55                           | 41.25882083                                                | 32.93999863                           |
| 97.23631356                                          | 47248085.01                           | 58.15850519                                                | 42.62537003                           |
| 89.32040176                                          | 52385961                              | 53.27783701                                                | 30.18917465                           |
| 70.82343051                                          | 30951102.34                           | 39.4777923                                                 | 23.85918713                           |
| 77.76691512                                          | 4828518.41                            | 51.17554047                                                | 34.14068222                           |
| 63.66067698                                          | 18856233.09                           | 35.80541429                                                | 33.08270645                           |
| 69.38659033                                          | 57552211.68                           | 36.493957                                                  | 26.11614418                           |
| 64.13162466                                          | 19036278.53                           | 33.94597582                                                | 18.64861298                           |
| 85.5089821                                           | 48190047.84                           | 50.03301795                                                | 23.17507744                           |
| 81.59548505                                          | 35057005.67                           | 45.53220807                                                | 26.79785156                           |
| 86.28631921                                          | 70850416.9                            | 51.09619957                                                | 41.64064026                           |
| 63.81263194                                          | 29252094.07                           | 34.13386489                                                | 22.9672451                            |
| 70.55898189                                          | 46816300.47                           | 35.9793313                                                 | 18.45117378                           |
| 61.04162676                                          | 52947395.13                           | 28.71293207                                                | 10.65299606                           |
| 69.06750982                                          | 11573074.31                           | 42.67928148                                                | 25.55558777                           |
| 82.43539333                                          | 86852394.09                           | 53.98952015                                                | 18.7654686                            |
| 64.36096099                                          | 22529052.35                           | 35.57855196                                                | 17.80230999                           |
| 101.3283018                                          | 64278002.23                           | 69.81246171                                                | 15.55314159                           |
| 77.81946192                                          | 45696978.16                           | 46.40679576                                                | 30.39393044                           |
| 93.38359633                                          | 44070214.92                           | 54.21135284                                                | 30.85545349                           |
| 76.71172388                                          | 18258891.2                            | 43.64278432                                                | 43.59672737                           |
| 79.08519783                                          | 35824453.49                           | 47.04578757                                                | 30.84522057                           |
| 77.30657242                                          | 60044906.21                           | 43.7284037                                                 | 27.04119778                           |
| 61.36165618                                          | 7699216.365                           | 34.20355109                                                | 35.36376953                           |
| 94.36090666                                          | 14920922.64                           | 56.42259493                                                | 42.91184235                           |
| 68.02447794                                          | 14394153.95                           | 39.60854148                                                | 30.77870941                           |
| 87.7774628                                           | 43898852.48                           | 50.68430574                                                | 41.64873505                           |
| 97.52491715                                          | 57501688.38                           | 63.38566241                                                | 31.72823334                           |
| 80.00969097                                          | 54839778.34                           | 49.52082138                                                | 30.3183651                            |
| 67.64578673                                          | 11042678.97                           | 40.51802975                                                | 31.91171265                           |
| 75.10568581                                          | 16679437.89                           | 43.22805738                                                | 32.11251831                           |
| 68.56776518                                          | 19464868.46                           | 39.70789781                                                | 28.4940834                            |
| 84.25570583                                          | 55430790.98                           | 52.3209316                                                 | 35.29548645                           |
| 69.21528224                                          | 35907753.4                            | 38.33192262                                                | 18.33411503                           |
| 77.70264904                                          | 20958925.15                           | 44.59918358                                                | 26.57748795                           |
| 87.43068518                                          | 131769883.9                           | 54.50674738                                                | 9.416220665                           |
| 67.7101518                                           | 20520425.98                           | 33.95355759                                                | 24.60770988                           |
| 81.35543857                                          | 40495509.21                           | 45.64252986                                                | 32.51232147                           |
| 81.0554673                                           | 83741682.15                           | 46.56362407                                                | 31.69756508                           |
| 78.45705084                                          | 99743722.59                           | 44.82744731                                                | 26.31801414                           |
| 59.17539669                                          | 5541457.011                           | 37.1897063                                                 | 28.57452297                           |
| 67.73169756                                          | 42063676.24                           | 35.55055831                                                | 21.17718124                           |
| 65.77954251                                          | 13192575.82                           | 34.42701332                                                | 17.47809029                           |
| 79.67462392                                          | 82090038.02                           | 45.78594868                                                | 24.6012373                            |
| 82.16996682                                          | 81888567.86                           | 49.03957998                                                | 33.64958954                           |
| 55.87546083                                          | 21020346.8                            | 31.62510767                                                | 21.89014435                           |
| 71.28149777                                          | 13496448.32                           | 41.52924149                                                | 26.48146057                           |
| 68.6629821                                           | 52336619.46                           | 35.60228189                                                | 28.09859276                           |
| 78.42465633                                          | 30473273.91                           | 44.11436085                                                | 26.69198418                           |
| 103.3916654                                          | 42519587.72                           | 66.08163154                                                | 27.90428543                           |
| 93.70171806                                          | 48058556.45                           | 61.31358107                                                | 22.80469513                           |
| 72.69963524                                          | 14248677.59                           | 42.4686176                                                 | 27.99029732                           |
| 64.07876356                                          | 22520512.24                           | 36.50633581                                                | 28.47938442                           |
| 66.90618055                                          | 10053188.8                            | 36.00612305                                                | 27.51577377                           |
| 67.80159136                                          | 16032939.57                           | 41.07774158                                                | 27.44684601                           |
| 94.77506539                                          | 39190023.32                           | 59.12136551                                                | 21.47129059                           |
| 104.3118575                                          | 42421655.6                            | 62.00246783                                                | 31.64349365                           |
| 84.45915823                                          | 26703332.01                           | 47.21566669                                                | 22.34378052                           |
| 67.94511773                                          | 35562751.38                           | 36.10289395                                                | 21.1096344                            |
| 60.00823794                                          | 20470709.59                           | 38.63595548                                                | 24.79286194                           |
| 87.11640182                                          | 36166430.43                           | 52.32834867                                                | 27.31686211                           |
| 37.49553714                                          | 5428050.368                           | 19.9054004                                                 | 16.16175652                           |
| 88.08492192                                          | 34930637.42                           | 53.49729905                                                | 20.86450195                           |
| 75.11235613                                          | 35340264.97                           | 43.56157081                                                | 35.34900475                           |
| 68.59589393                                          | 16361420.36                           | 38.19283814                                                | 31.99996853                           |
| 64.19928892                                          | 19552731.38                           | 34.99565107                                                | 28.37468529                           |
| 46.96304561                                          | 7574498.845                           | 23.62675049                                                | 19.40757561                           |
| 89.30388229                                          | 35405154.97                           | 58.70487042                                                | 36.31629562                           |
| 85.98536994                                          | 73124387.49                           | 52.3470634                                                 | 27.34523773                           |
| 68.47921461                                          | 34167249.7                            | 39.06135576                                                | 30.90004539                           |
| 86.53082576                                          | 56661411.5                            | 56.99551225                                                | 25.20189381                           |
| 80.31659956                                          | 55805000.07                           | 41.15423612                                                | 25.32611465                           |
| 73.70675168                                          | 29476891.8                            | 44.73080111                                                | 22.76369858                           |
| 79.76465042                                          | 14625788.29                           | 42.7713936                                                 | 19.74440956                           |
| 56.60007943                                          | 5325814.245                           | 33.07577717                                                | 18.92910862                           |
| 57.03457081                                          | 48311613.2                            | 29.19276022                                                | 21.94919872                           |

| log.sigma.1.5.mm.3D_firstorder_TotalEnergy | log.sigma.1.5.mm.3D_firstorder_Maximum | log.sigma.1.5.mm.3D_firstorder_RootMeanSquared | log.sigma.1.5.mm.3D_firstorder_90Percentile | log.sigma.1.5.mm.3D_firstorder_Minimum |
|--------------------------------------------|----------------------------------------|------------------------------------------------|---------------------------------------------|----------------------------------------|
| 1260616801                                 | 468.5677185                            | 148.3327244                                    | 179.145488                                  | -726.3479614                           |
| 217756808.4                                | 356.8818665                            | 92.87486249                                    | 117.4350937                                 | -405.6069641                           |
| 343993101                                  | 378.6378784                            | 91.13397313                                    | 135.628537                                  | -378.4751282                           |
| 393901786.7                                | 277.6601563                            | 122.1982008                                    | 139.2142151                                 | -590.5610352                           |
| 774976751.7                                | 336.2980957                            | 110.0960166                                    | 134.4264465                                 | -448.4664917                           |
| 326682020.5                                | 529.7116699                            | 135.3969142                                    | 172.8774643                                 | -543.9641724                           |
| 1644153494                                 | 509.7266541                            | 103.8070009                                    | 143.8770142                                 | -485.1216736                           |
| 1600563595                                 | 499.6993408                            | 107.7281349                                    | 135.843959                                  | -578.3897705                           |
| 1619613305                                 | 515.8327026                            | 114.8706478                                    | 148.1566925                                 | -510.1991577                           |
| 420533910.8                                | 420.6257935                            | 120.5372381                                    | 155.8674973                                 | -527.9746704                           |
| 332465549.3                                | 336.8539124                            | 90.36302728                                    | 119.7319489                                 | -396.0690002                           |
| 1094390156                                 | 436.9432678                            | 132.6076999                                    | 167.2093689                                 | -615.2279663                           |
| 438186536.5                                | 423.1036987                            | 93.2342483                                     | 93.43104248                                 | -561.0818481                           |
| 738012551.5                                | 429.7047424                            | 126.1725395                                    | 146.6186493                                 | -578.149292                            |
| 993267046.8                                | 629.1907349                            | 136.1696426                                    | 166.2915588                                 | -618.4591064                           |
| 1183459966                                 | 480.1795044                            | 100.0820625                                    | 122.1803856                                 | -572.1240234                           |
| 398611579.9                                | 381.0253296                            | 111.1964468                                    | 147.0560638                                 | -370.8829346                           |
| 253080029.7                                | 364.3120728                            | 87.1897618                                     | 105.5291885                                 | -491.1274414                           |
| 272518358.4                                | 436.3651428                            | 88.18173791                                    | 111.0952477                                 | -505.7911377                           |
| 2066063770                                 | 539.7545776                            | 121.3193487                                    | 157.5719818                                 | -599.7666626                           |
| 515921348.9                                | 343.460022                             | 79.49118555                                    | 101.1288506                                 | -439.669342                            |
| 295860191.9                                | 312.3215637                            | 100.7745025                                    | 136.3105835                                 | -407.1356201                           |
| 303290371.6                                | 394.077588                             | 104.7363539                                    | 134.7717941                                 | -604.3341064                           |
| 735512709.5                                | 347.8603821                            | 101.4463061                                    | 143.9771912                                 | -507.6459961                           |
| 487035923.9                                | 448.9316711                            | 119.0376691                                    | 162.4288513                                 | -564.3134766                           |
| 1275698295                                 | 556.6469116                            | 141.224347                                     | 195.3129089                                 | -616.7860718                           |
| 1414420947                                 | 465.6698303                            | 127.2930244                                    | 174.2519409                                 | -553.0133057                           |
| 835679763.1                                | 375.5736389                            | 105.8586189                                    | 126.2964417                                 | -580.00354                             |
| 130369997.1                                | 345.6487732                            | 103.9329332                                    | 146.8023499                                 | -395.9282227                           |
| 509118293.4                                | 369.9594116                            | 95.81362012                                    | 115.4095833                                 | -562.6936646                           |
| 1553909715                                 | 628.5916138                            | 108.9812851                                    | 139.2916962                                 | -602.2737427                           |
| 513979520.4                                | 333.4610291                            | 95.92035557                                    | 102.6493195                                 | -532.3000488                           |
| 1301131292                                 | 597.5241699                            | 122.1643972                                    | 151.816571                                  | -557.0263062                           |
| 946539153                                  | 515.2243042                            | 122.1387352                                    | 157.8228745                                 | -525.2719116                           |
| 1912961256                                 | 605.5480347                            | 126.8374639                                    | 181.8006271                                 | -488.052124                            |
| 789806539.9                                | 575.0136108                            | 98.76208453                                    | 128.5179657                                 | -483.028717                            |
| 1264040113                                 | 601.2675171                            | 112.1679315                                    | 113.1629715                                 | -762.7156982                           |
| 1429579668                                 | 569.7335205                            | 101.2873876                                    | 124.7093048                                 | -754.2522583                           |
| 312473006.4                                | 267.3569336                            | 97.00001807                                    | 110.0701912                                 | -550.2449951                           |
| 2345014640                                 | 457.1125183                            | 109.3008883                                    | 144.8301605                                 | -421.5401611                           |
| 608284413.3                                | 359.23349                              | 93.19368318                                    | 108.2042114                                 | -414.4934998                           |
| 1735506060                                 | 492.4440308                            | 128.9270659                                    | 174.9722168                                 | -397.6248779                           |
| 1233818410                                 | 459.0801086                            | 111.8456003                                    | 148.2628235                                 | -535.100647                            |
| 1189895803                                 | 429.9773254                            | 133.0906041                                    | 154.8661591                                 | -585.2130127                           |
| 492990062.5                                | 389.2586975                            | 119.5285837                                    | 157.861969                                  | -602.8538208                           |
| 967260244.1                                | 567.0192261                            | 114.24011                                      | 161.3169281                                 | -527.3985291                           |
| 1621212468                                 | 519.710083                             | 114.7256283                                    | 146.9713089                                 | -457.2659912                           |
| 207878841.9                                | 385.8098755                            | 94.01868762                                    | 109.5038376                                 | -425.5615234                           |
| 402864911.3                                | 447.4065552                            | 132.4137421                                    | 165.4450836                                 | -429.2575684                           |
| 388642156.5                                | 324.6626587                            | 103.1821863                                    | 160.8983185                                 | -512.3709717                           |
| 1185269017                                 | 584.4699097                            | 130.7207503                                    | 178.7987457                                 | -591.8245239                           |
| 1552545586                                 | 501.6094971                            | 100.6053364                                    | 171.8848267                                 | -547.7300415                           |
| 1480674015                                 | 450.0793457                            | 110.2461164                                    | 140.7251221                                 | -450.9631042                           |
| 298152332.1                                | 402.480957                             | 100.0121323                                    | 136.8241547                                 | -413.0023193                           |
| 450344823.1                                | 396.0574993                            | 111.9862971                                    | 146.9679642                                 | -514.0030518                           |
| 525551448.4                                | 339.2141113                            | 99.90987852                                    | 125.9531227                                 | -463.0403748                           |
| 1496631356                                 | 474.5036316                            | 117.0620904                                    | 156.468985                                  | -485.041748                            |
| 969509341.8                                | 462.1520081                            | 101.9017453                                    | 115.8690407                                 | -612.0535889                           |
| 565890978.9                                | 494.5033264                            | 112.7731989                                    | 127.0201096                                 | -584.253418                            |
| 3557786866                                 | 499.045166                             | 120.1424484                                    | 155.2084167                                 | -601.8453369                           |
| 554051501.4                                | 449.6740112                            | 107.7948063                                    | 132.3679581                                 | -541.480835                            |
| 1093378749                                 | 586.130127                             | 123.1537957                                    | 157.0160431                                 | -735.3656616                           |
| 2261025418                                 | 450.9007568                            | 120.2732552                                    | 175.2148712                                 | -639.1016846                           |
| 2693080510                                 | 591.2211304                            | 114.3878314                                    | 130.0735107                                 | -615.5220337                           |
| 149619339.3                                | 263.6398926                            | 83.7526271                                     | 118.5461159                                 | -303.526886                            |
| 1135719258                                 | 486.3401489                            | 104.3632219                                    | 118.0825401                                 | -586.6571045                           |
| 356199547.2                                | 357.9675598                            | 100.5833286                                    | 103.324836                                  | -531.8720703                           |
| 2216431026                                 | 546.4417725                            | 114.6054365                                    | 132.5579544                                 | -597.2807617                           |
| 2210991332                                 | 600.3140259                            | 118.242615                                     | 147.1309692                                 | -667.3056641                           |
| 567549363.6                                | 311.3051453                            | 85.16688201                                    | 110.0447449                                 | -473.6442261                           |
| 364404104.7                                | 367.1134644                            | 101.9307389                                    | 128.5417114                                 | -420.6064758                           |
| 1413088725                                 | 501.4476929                            | 110.4521534                                    | 147.7413773                                 | -601.0206909                           |
| 822778395.7                                | 458.5201721                            | 115.6344915                                    | 149.6139984                                 | -449.1599121                           |
| 1148028868                                 | 564.7175293                            | 137.194407                                     | 163.5603821                                 | -531.2008667                           |
| 1297581024                                 | 466.358655                             | 123.8921606                                    | 164.3235474                                 | -445.4282532                           |
| 384714294.8                                | 430.7283325                            | 103.0412271                                    | 118.9037575                                 | -440.2995605                           |
| 608053830.5                                | 543.6373901                            | 96.94953388                                    | 119.9598694                                 | -466.8915405                           |
| 271436097.7                                | 344.0234375                            | 102.4399045                                    | 117.3428108                                 | -478.6594543                           |
| 432889368.5                                | 359.7433472                            | 96.91473606                                    | 122.0585968                                 | -506.9868774                           |
| 1058130630                                 | 570.0599365                            | 129.4412356                                    | 153.8497009                                 | -575.5256958                           |
| 1145384701                                 | 468.5677185                            | 146.0415438                                    | 178.3981445                                 | -726.3479614                           |
| 72098964.3                                 | 507.3128357                            | 121.8336193                                    | 135.9826447                                 | -515.1669922                           |
| 960194287.4                                | 486.4680176                            | 104.3014189                                    | 130.6462952                                 | -573.4862061                           |
| 552709158.9                                | 268.0395508                            | 81.61785342                                    | 108.0043243                                 | -417.3042297                           |
| 976493621.5                                | 474.9399109                            | 121.7718554                                    | 156.5031464                                 | -491.2894287                           |
| 146557359.9                                | 207.9217682                            | 59.52406082                                    | 71.58325729                                 | -404.3529663                           |
| 943127210.4                                | 511.7877197                            | 121.0205337                                    | 136.0028564                                 | -450.0190125                           |
| 954187154.1                                | 347.8744202                            | 113.5275264                                    | 168.4999329                                 | -565.5094604                           |
| 441758349.6                                | 347.865448                             | 105.7158152                                    | 133.7972763                                 | -4561.7033691                          |
| 527923747.2                                | 315.9159241                            | 98.26326788                                    | 117.1050507                                 | -575.8621826                           |
| 204511468.8                                | 303.0091248                            | 76.21459675                                    | 107.8373367                                 | -548.3112793                           |
| 955939184.1                                | 450.2951355                            | 121.9164677                                    | 179.8340424                                 | -484.008728                            |
| 1974358462                                 | 541.3806763                            | 118.7792329                                    | 142.9000732                                 | -477.5492249                           |
| 922515742                                  | 385.5720215                            | 101.7531918                                    | 138.9607697                                 | -449.8111572                           |
| 1529858110                                 | 512.1204224                            | 114.1035749                                    | 140.4692581                                 | -521.2532349                           |
| 1506735002                                 | 509.3007507                            | 127.7016633                                    | 164.7233047                                 | -725.3708496                           |
| 795876078.5                                | 391.3773804                            | 102.2933544                                    | 123.4020325                                 | -618.8023071                           |
| 394896283.8                                | 374.7602539                            | 118.1915153                                    | 121.8373245                                 | -415.9189453                           |
| 143796984.6                                | 212.9295807                            | 79.91162868                                    | 93.69394379                                 | -355.9720459                           |
| 1304413556                                 | 374.0271912                            | 91.47183257                                    | 126.7522583                                 | -542.4287109                           |

| log.sigma.1.5.mm.3D_firstorder_Entropy | log.sigma.1.5.mm.3D_firstorder_StandardDeviation | log.sigma.1.5.mm.3D_firstorder_Range | log.sigma.1.5.mm.3D_firstorder_Variance | log.sigma.1.5.mm.3D_firstorder_10Percentile |
|----------------------------------------|--------------------------------------------------|--------------------------------------|-----------------------------------------|---------------------------------------------|
| 4.454624097                            | 147.6800519                                      | 1194.91568                           | 21809.39774                             | -189.4517258                                |
| 3.61042157                             | 88.88247273                                      | 762.4888306                          | 7900.093958                             | -57.72800217                                |
| 3.660549458                            | 88.06373941                                      | 757.1130066                          | 7755.222199                             | -68.33862686                                |
| 4.134856112                            | 121.8972199                                      | 868.2219114                          | 14858.93222                             | -151.2677429                                |
| 3.9976676                              | 108.9549012                                      | 784.7645874                          | 11871.17049                             | -124.5995583                                |
| 4.269620391                            | 132.2606876                                      | 1073.675842                          | 17492.88949                             | -107.0710052                                |
| 3.958445828                            | 101.2436014                                      | 994.8483276                          | 10250.26683                             | -97.68112183                                |
| 3.83709226                             | 104.7269168                                      | 1078.089111                          | 10967.7271                              | -83.56523666                                |
| 4.089528476                            | 112.3498113                                      | 1026.03186                           | 12622.4801                              | -113.0824547                                |
| 4.100281791                            | 116.7141487                                      | 948.6004639                          | 13622.19251                             | -110.8346756                                |
| 3.786556638                            | 88.31581394                                      | 732.9229126                          | 7799.682992                             | -88.84310074                                |
| 4.187463698                            | 128.5857405                                      | 1052.171234                          | 16534.29266                             | -104.485878                                 |
| 3.420544614                            | 92.16550894                                      | 984.1855469                          | 8494.481038                             | -54.56278229                                |
| 4.157550168                            | 124.4255149                                      | 1007.854034                          | 15481.70877                             | -121.2231812                                |
| 4.243743289                            | 134.1673763                                      | 1247.649841                          | 18000.88487                             | -142.1515396                                |
| 3.798439055                            | 98.90168732                                      | 1052.303528                          | 9781.543755                             | -90.30568695                                |
| 4.135855801                            | 109.6589541                                      | 751.9082642                          | 12025.08621                             | -125.5701065                                |
| 3.507662368                            | 84.45318957                                      | 855.4395142                          | 7132.341229                             | -57.32144775                                |
| 3.732984512                            | 86.47750479                                      | 942.1562805                          | 7478.358835                             | -91.80355911                                |
| 4.13960349                             | 118.3830294                                      | 1139.52124                           | 14014.54165                             | -108.8209595                                |
| 3.470220777                            | 77.12929312                                      | 783.129364                           | 5948.927858                             | -61.97075233                                |
| 3.927246194                            | 97.81009877                                      | 719.4571838                          | 9566.815421                             | -96.13405457                                |
| 3.912562156                            | 102.9080129                                      | 998.4118652                          | 10590.05912                             | -101.5106468                                |
| 3.929180999                            | 98.3435805                                       | 855.5063782                          | 9671.459825                             | -83.88870544                                |
| 3.981121263                            | 113.936213                                       | 1013.245148                          | 12981.46062                             | -83.50265503                                |
| 4.383314539                            | 135.4426377                                      | 1173.432983                          | 18344.70811                             | -120.2657379                                |
| 4.266269478                            | 124.5178114                                      | 1018.683136                          | 15504.68537                             | -123.0568893                                |
| 3.906848789                            | 104.5211738                                      | 955.577179                           | 10924.67578                             | -94.15443954                                |
| 3.999514387                            | 100.8866311                                      | 741.5769958                          | 10178.11233                             | -97.8875351                                 |
| 3.736340926                            | 93.10115337                                      | 932.6530762                          | 8667.82476                              | -82.01280975                                |
| 3.88377887                             | 107.2385101                                      | 1230.865356                          | 11500.09805                             | -81.67458267                                |
| 3.713876383                            | 95.64069536                                      | 865.7610779                          | 9147.142609                             | -104.1864899                                |
| 4.197732645                            | 120.9483467                                      | 1154.550476                          | 14628.50258                             | -129.5848511                                |
| 4.101448272                            | 120.2154384                                      | 1040.496216                          | 14451.75163                             | -114.9562935                                |
| 4.207229116                            | 121.157251                                       | 1093.600159                          | 14679.07946                             | -107.3823257                                |
| 3.764693455                            | 96.36619179                                      | 1058.042328                          | 9286.44292                              | -74.13674316                                |
| 3.88363445                             | 111.5612745                                      | 1363.983215                          | 12445.91796                             | -92.11877441                                |
| 3.63000431                             | 100.2978557                                      | 1323.985779                          | 10059.65986                             | -70.41710663                                |
| 3.807666145                            | 96.28923186                                      | 817.6019287                          | 9271.616173                             | -92.83496628                                |
| 4.136543502                            | 108.2952516                                      | 878.6526794                          | 11727.86151                             | -124.7976974                                |
| 3.746355945                            | 92.76380011                                      | 773.7269897                          | 8605.12261                              | -111.2856178                                |
| 4.399766267                            | 128.2209611                                      | 890.0689087                          | 16440.61488                             | -158.661554                                 |
| 4.058115342                            | 109.2877635                                      | 994.1807556                          | 11943.81525                             | -104.7658264                                |
| 4.281061718                            | 132.017885                                       | 1015.190338                          | 17428.72195                             | -144.3852798                                |
| 4.009989854                            | 113.5045423                                      | 992.1125183                          | 12883.28112                             | -73.2036705                                 |
| 4.087856872                            | 110.5996244                                      | 1024.417755                          | 12232.27692                             | -105.8845016                                |
| 4.057591004                            | 112.2441729                                      | 1046.976074                          | 12598.75434                             | -104.1307556                                |
| 3.660577318                            | 90.85469001                                      | 811.3713989                          | 8254.574696                             | -75.65418243                                |
| 4.264232896                            | 129.4010111                                      | 876.6641235                          | 16744.62166                             | -148.6431122                                |
| 3.833403747                            | 97.36702045                                      | 837.0336304                          | 9480.336672                             | -72.48345566                                |
| 4.227191576                            | 125.9301508                                      | 1176.294434                          | 15858.40288                             | -104.2970001                                |
| 4.371155394                            | 128.6299445                                      | 1049.339539                          | 16545.66262                             | -143.9832764                                |
| 4.08835311                             | 108.3760365                                      | 901.04245                            | 11745.36529                             | -120.5024689                                |
| 3.862187827                            | 95.24030621                                      | 815.4832764                          | 9070.715928                             | -80.45902023                                |
| 4.008671521                            | 107.9852128                                      | 910.0605469                          | 11660.80618                             | -94.67145157                                |
| 3.843014386                            | 98.04833871                                      | 802.2544861                          | 9613.476725                             | -93.39643784                                |
| 4.157874946                            | 114.126415                                       | 959.5453796                          | 13024.83861                             | -122.666803                                 |
| 3.871782612                            | 101.507678                                       | 1074.205597                          | 10303.80869                             | -104.2836945                                |
| 4.023711139                            | 111.7046068                                      | 1078.756474                          | 12477.91918                             | -110.8215401                                |
| 4.227849571                            | 119.6433339                                      | 1100.890503                          | 14314.52735                             | -128.4418274                                |
| 3.816594557                            | 105.2117571                                      | 991.1548462                          | 11069.51383                             | -86.09582901                                |
| 4.106606816                            | 120.4656137                                      | 1321.495789                          | 14511.96408                             | -107.1412674                                |
| 4.111168851                            | 116.2322747                                      | 1090.002441                          | 13509.94169                             | -105.236319                                 |
| 4.063198867                            | 113.0954329                                      | 1206.743164                          | 12790.57695                             | -110.449942                                 |
| 3.651294426                            | 80.23186061                                      | 567.1667786                          | 6437.151457                             | -73.90356445                                |
| 3.828876279                            | 103.3400636                                      | 1072.997253                          | 10679.16875                             | -94.28529129                                |
| 3.769075156                            | 100.3301316                                      | 889.8396301                          | 10066.1353                              | -94.30341034                                |
| 4.08281934                             | 113.7130371                                      | 1143.722534                          | 12930.65481                             | -125.4742226                                |
| 4.129857323                            | 115.8099664                                      | 1267.61969                           | 13411.94832                             | -115.4535248                                |
| 3.581684485                            | 83.10325068                                      | 784.9493713                          | 6906.150274                             | -63.03623924                                |
| 3.906174103                            | 100.7818035                                      | 787.7199402                          | 10156.97193                             | -109.5165756                                |
| 3.855211861                            | 106.6633435                                      | 1102.468384                          | 11377.06885                             | -72.91686401                                |
| 4.056929519                            | 113.250268                                       | 907.6800842                          | 12825.62321                             | -115.1707855                                |
| 4.41571675                             | 136.8642585                                      | 1095.918396                          | 18731.82526                             | -182.0614594                                |
| 4.309704036                            | 122.9454847                                      | 911.7841187                          | 15115.5922                              | -145.7737122                                |
| 3.907352486                            | 101.9567232                                      | 871.0278931                          | 10395.1734                              | -109.4412056                                |
| 3.786357837                            | 93.35290103                                      | 1010.528931                          | 8714.764131                             | -74.57373428                                |
| 3.80520075                             | 100.8341052                                      | 822.6828918                          | 10167.51677                             | -85.70589981                                |
| 3.842964243                            | 95.12941205                                      | 866.7302246                          | 9049.605036                             | -90.18947754                                |
| 4.320845416                            | 129.0571988                                      | 1145.585632                          | 16655.76057                             | -152.7258942                                |
| 4.419573909                            | 145.1431604                                      | 1194.91568                           | 21066.53701                             | -178.4458374                                |
| 4.131027014                            | 121.5513273                                      | 1022.479828                          | 14774.72518                             | -151.0295135                                |
| 3.849915305                            | 102.7263417                                      | 1059.954224                          | 10552.70128                             | -90.18002319                                |
| 3.670007346                            | 79.78214755                                      | 685.3437805                          | 6365.191068                             | -86.72110901                                |
| 4.199284112                            | 120.6140506                                      | 966.2293396                          | 14547.74921                             | -135.7827332                                |
| 2.991132428                            | 58.33355722                                      | 612.2747345                          | 3402.803898                             | -44.88019142                                |
| 4.202189132                            | 120.814812                                       | 961.8067322                          | 14596.21881                             | -155.9372498                                |
| 3.997650813                            | 107.6282482                                      | 804.3838806                          | 11583.8398                              | -77.89777222                                |
| 3.845518798                            | 102.6860156                                      | 909.5688171                          | 10544.41781                             | -82.79699249                                |
| 3.738096311                            | 96.1397457                                       | 891.7781067                          | 9242.850704                             | -85.8271225                                 |
| 3.30611529                             | 72.73418916                                      | 851.3204041                          | 5290.262273                             | -48.97793884                                |
| 4.243369404                            | 117.1821895                                      | 934.3038635                          | 13731.66554                             | -111.0451141                                |
| 4.173175879                            | 117.8496326                                      | 1018.929901                          | 13888.5359                              | -142.2613831                                |
| 3.860345171                            | 98.52061242                                      | 835.3831787                          | 9706.311072                             | -86.61681824                                |
| 4.179651996                            | 113.2841111                                      | 1033.373657                          | 12833.28982                             | -135.4551483                                |
| 4.038992653                            | 125.523293                                       | 1234.6716                            | 15756.09708                             | -100.4753067                                |
| 3.971310253                            | 101.3261614                                      | 810.1796875                          | 10266.99098                             | -114.2254026                                |
| 4.017195633                            | 118.0886865                                      | 990.6791992                          | 13944.93788                             | -132.6259918                                |
| 3.551989608                            | 79.5163278                                       | 568.9016266                          | 6322.846386                             | -91.24517288                                |
| 3.584940243                            | 88.14077047                                      | 916.4559021                          | 7768.795419                             | -58.64483681                                |

| log.sigma.1.5.mm.3D_firstorder_Kurtosis | log.sigma.1.5.mm.3D_firstorder_Mean | log.sigma.1.5.mm.3D_glrIm_ShortRunLowGrayLevelEmphasis | log.sigma.1.5.mm.3D_glrIm_GrayLevelVariance |
|-----------------------------------------|-------------------------------------|--------------------------------------------------------|---------------------------------------------|
| 4.527984769                             | 13.89961877                         | 0.00173085                                             | 36.25261888                                 |
| 7.164040061                             | 26.93781959                         | 0.005115982                                            | 13.87707542                                 |
| 5.630567674                             | 23.45589176                         | 0.004866118                                            | 13.81933848                                 |
| 5.598507918                             | 8.571350256                         | 0.003249019                                            | 25.2282308                                  |
| 5.17971882                              | 15.8101987                          | 0.007079515                                            | 20.2789001                                  |
| 5.472552162                             | 28.97300274                         | 0.00397457                                             | 29.41377338                                 |
| 5.128302728                             | 22.92654821                         | 0.002754326                                            | 17.50238944                                 |
| 6.517523747                             | 25.25121669                         | 0.001905745                                            | 19.19366932                                 |
| 5.24065487                              | 23.93294006                         | 0.003063902                                            | 21.25598861                                 |
| 5.49859888                              | 30.11699289                         | 0.003399393                                            | 22.99308068                                 |
| 4.923116104                             | 19.12573415                         | 0.005094856                                            | 13.20243418                                 |
| 6.839184788                             | 32.41156284                         | 0.002868255                                            | 28.0204598                                  |
| 10.5215938                              | 14.07636383                         | 0.003215101                                            | 15.58423747                                 |
| 6.390882416                             | 20.92369381                         | 0.003016107                                            | 26.24258486                                 |
| 5.65517464                              | 23.26556909                         | 0.002423149                                            | 30.41160863                                 |
| 7.364840226                             | 15.32564804                         | 0.002332801                                            | 17.05585918                                 |
| 3.679189269                             | 18.42725101                         | 0.007212616                                            | 20.10479834                                 |
| 8.452393403                             | 21.67289258                         | 0.003417561                                            | 12.63325692                                 |
| 5.734014981                             | 17.25282777                         | 0.002962536                                            | 12.83472592                                 |
| 6.138848256                             | 26.53003443                         | 0.002387832                                            | 23.68891228                                 |
| 6.275690968                             | 19.23332324                         | 0.003158696                                            | 10.5797665                                  |
| 4.677478582                             | 24.26283033                         | 0.0050965                                              | 15.97630583                                 |
| 6.781501275                             | 19.48447355                         | 0.002632164                                            | 18.25206765                                 |
| 5.261541099                             | 24.89765454                         | 0.002640357                                            | 16.43219411                                 |
| 7.371652239                             | 34.47471586                         | 0.003911575                                            | 22.23762324                                 |
| 4.644327718                             | 39.99510049                         | 0.002018474                                            | 30.64864093                                 |
| 4.597392169                             | 26.43536849                         | 0.002410804                                            | 26.27706099                                 |
| 7.117400256                             | 16.77412919                         | 0.002291346                                            | 18.68944822                                 |
| 3.760586658                             | 24.97883669                         | 0.00630239                                             | 16.68002486                                 |
| 7.4976996                               | 22.6368072                          | 0.002399431                                            | 14.87780763                                 |
| 8.026934124                             | 24.40870806                         | 0.001962865                                            | 20.13926331                                 |
| 6.765027574                             | 7.319289843                         | 0.00276386                                             | 15.88607374                                 |
| 5.196053789                             | 17.19410814                         | 0.002398961                                            | 24.85691473                                 |
| 6.10534859                              | 21.58988478                         | 0.003305046                                            | 24.7858933                                  |
| 4.803496803                             | 37.5321568                          | 0.003145142                                            | 24.81278175                                 |
| 6.753272771                             | 21.62189678                         | 0.003038003                                            | 16.24385731                                 |
| 9.449200924                             | 11.65018806                         | 0.001386327                                            | 21.69589188                                 |
| 9.625073405                             | 14.12356258                         | 0.001211037                                            | 18.50973204                                 |
| 7.482628009                             | 11.7212343                          | 0.002938669                                            | 15.53557445                                 |
| 3.721351617                             | 14.79265628                         | 0.00420291                                             | 19.59143108                                 |
| 5.180146656                             | 8.940915784                         | 0.00461137                                             | 14.78845077                                 |
| 3.110937164                             | 13.47491896                         | 0.006630689                                            | 27.05347945                                 |
| 5.367743688                             | 23.78283127                         | 0.002567122                                            | 20.14530604                                 |
| 5.32908483                              | 16.86377591                         | 0.002706893                                            | 29.26189398                                 |
| 8.012973645                             | 37.46733503                         | 0.002628167                                            | 21.93883032                                 |
| 4.814633664                             | 28.60989009                         | 0.00325743                                             | 20.56105418                                 |
| 5.767901567                             | 23.7321608                          | 0.002459636                                            | 21.47540338                                 |
| 7.442076396                             | 24.18551067                         | 0.004610834                                            | 14.16824934                                 |
| 4.187121158                             | 28.08518197                         | 0.006741909                                            | 27.76896368                                 |
| 5.623790436                             | 34.15006438                         | 0.002913333                                            | 16.17767074                                 |
| 5.720594686                             | 35.06439327                         | 0.002651743                                            | 26.70229715                                 |
| 3.952024459                             | 22.62943385                         | 0.00262113                                             | 27.32666289                                 |
| 4.327993254                             | 20.21981463                         | 0.003391815                                            | 19.63415466                                 |
| 5.588736373                             | 30.52393607                         | 0.004748317                                            | 15.41689392                                 |
| 5.732438112                             | 29.66689335                         | 0.003306136                                            | 19.8341124                                  |
| 6.182845277                             | 19.19653879                         | 0.004415153                                            | 16.40300917                                 |
| 4.467147989                             | 26.0517636                          | 0.003275109                                            | 21.75550889                                 |
| 6.502395169                             | 8.953045151                         | 0.001944805                                            | 17.70147587                                 |
| 6.190841655                             | 15.48790523                         | 0.002486412                                            | 21.14069075                                 |
| 4.529477811                             | 10.93986057                         | 0.001818729                                            | 24.1459014                                  |
| 6.754929                                | 23.45647943                         | 0.002769363                                            | 19.37901304                                 |
| 7.453087214                             | 25.59088331                         | 0.001546019                                            | 24.70044306                                 |
| 5.251430786                             | 30.91462815                         | 0.001658529                                            | 23.03848618                                 |
| 6.142025898                             | 17.14639954                         | 0.001828747                                            | 21.70055433                                 |
| 4.445045329                             | 24.02813121                         | 0.007664654                                            | 10.95659371                                 |
| 7.319179672                             | 14.57783734                         | 0.002117487                                            | 18.54434894                                 |
| 7.688593414                             | 7.132369814                         | 0.003238915                                            | 17.56173268                                 |
| 5.594826659                             | 14.27414702                         | 0.002224091                                            | 21.95049747                                 |
| 5.960107315                             | 23.86142674                         | 0.001597748                                            | 22.47261917                                 |
| 8.065862583                             | 18.63457853                         | 0.003529298                                            | 12.08589514                                 |
| 5.332396968                             | 15.26117986                         | 0.006298693                                            | 17.44786677                                 |
| 7.954515108                             | 28.68116716                         | 0.001935108                                            | 19.80961699                                 |
| 5.077220959                             | 23.36048854                         | 0.005025017                                            | 22.03493745                                 |
| 3.958184819                             | 9.512100857                         | 0.003388565                                            | 31.07104099                                 |
| 3.568828383                             | 15.28644075                         | 0.004435425                                            | 25.15932468                                 |
| 5.307587594                             | 14.91043526                         | 0.004708204                                            | 17.50985424                                 |
| 6.469278671                             | 26.16195691                         | 0.003158007                                            | 14.98061107                                 |
| 7.62560844                              | 18.06702152                         | 0.005663514                                            | 17.58846505                                 |
| 6.674791544                             | 18.51650692                         | 0.003230483                                            | 15.28913024                                 |
| 4.857991038                             | 9.963579642                         | 0.002492277                                            | 27.74388189                                 |
| 4.774100457                             | 16.17391457                         | 0.001751194                                            | 35.01827123                                 |
| 5.312748572                             | 8.28888552                          | 0.003768721                                            | 25.44209943                                 |
| 6.958754257                             | 18.0578155                          | 0.00261935                                             | 18.37513803                                 |
| 4.305204581                             | 17.21287099                         | 0.003671706                                            | 10.82442945                                 |
| 4.571310212                             | 16.75218032                         | 0.004059853                                            | 24.54872145                                 |
| 11.16309901                             | 11.8452488                          | 0.00413481                                             | 6.398023281                                 |
| 4.367326306                             | 7.053422013                         | 0.004683709                                            | 24.63374238                                 |
| 5.462961289                             | 36.12006999                         | 0.00360755                                             | 19.87213907                                 |
| 7.726927173                             | 25.12798779                         | 0.00271868                                             | 18.03534891                                 |
| 7.847930003                             | 20.31795048                         | 0.002292132                                            | 15.96046045                                 |
| 8.342072944                             | 22.76845374                         | 0.002621113                                            | 9.51744208                                  |
| 3.979543091                             | 33.64460657                         | 0.003145845                                            | 22.78947308                                 |
| 4.543586345                             | 14.83139495                         | 0.003184768                                            | 23.2092914                                  |
| 5.558017865                             | 25.44407514                         | 0.004557703                                            | 16.60140747                                 |
| 4.103110376                             | 13.65049387                         | 0.002774747                                            | 21.26595618                                 |
| 7.791473304                             | 23.48654352                         | 0.001505106                                            | 27.4558563                                  |
| 4.650546367                             | 14.0335088                          | 0.004900476                                            | 17.41396057                                 |
| 6.887272201                             | 4.929137675                         | 0.003879311                                            | 23.84620703                                 |
| 5.595969305                             | 7.938640496                         | 0.006548394                                            | 11.04035926                                 |
| 7.144003768                             | 24.46018675                         | 0.002113411                                            | 13.74569585                                 |

| log.sigma.1.5.mm.3D_glrIm_LowGrayLevelRunEmphasis | log.sigma.1.5.mm.3D_glrIm_GrayLevelNonUniformityNormalized | log.sigma.1.5.mm.3D_glrIm_RunVariance | log.sigma.1.5.mm.3D_glrIm_GrayLevelNonUniformity |
|---------------------------------------------------|------------------------------------------------------------|---------------------------------------|--------------------------------------------------|
| 0.001774989                                       | 0.058963987                                                | 0.064061679                           | 118.2335757                                      |
| 0.005330216                                       | 0.108254367                                                | 0.12747109                            | 91.40956918                                      |
| 0.005165036                                       | 0.102678566                                                | 0.195175665                           | 138.6570057                                      |
| 0.00333965                                        | 0.073585096                                                | 0.094055933                           | 66.41771989                                      |
| 0.007280647                                       | 0.081412993                                                | 0.104815267                           | 177.1575676                                      |
| 0.004049978                                       | 0.067947556                                                | 0.061008499                           | 42.46010934                                      |
| 0.002895564                                       | 0.081850146                                                | 0.11432645                            | 423.1007125                                      |
| 0.002020759                                       | 0.096731353                                                | 0.136844293                           | 444.5048295                                      |
| 0.003173241                                       | 0.074564501                                                | 0.089248532                           | 314.2655332                                      |
| 0.003488581                                       | 0.074500176                                                | 0.075663264                           | 74.62623674                                      |
| 0.005296625                                       | 0.088780755                                                | 0.093172889                           | 123.4622767                                      |
| 0.002941918                                       | 0.072063121                                                | 0.084995104                           | 154.5207321                                      |
| 0.003393805                                       | 0.133655686                                                | 0.200837551                           | 215.5968408                                      |
| 0.003106909                                       | 0.074647801                                                | 0.092129704                           | 118.5990502                                      |
| 0.002495551                                       | 0.070895487                                                | 0.076966586                           | 131.4620675                                      |
| 0.002458599                                       | 0.097098826                                                | 0.131747579                           | 383.1965718                                      |
| 0.007401086                                       | 0.068224445                                                | 0.068748443                           | 76.65306309                                      |
| 0.003608961                                       | 0.118334779                                                | 0.154893571                           | 129.345669                                       |
| 0.003084866                                       | 0.093758811                                                | 0.095713349                           | 111.932246                                       |
| 0.002467327                                       | 0.074726894                                                | 0.082246289                           | 362.0182649                                      |
| 0.003409757                                       | 0.117598098                                                | 0.188341625                           | 311.3342277                                      |
| 0.005237661                                       | 0.080449919                                                | 0.06964844                            | 81.42901937                                      |
| 0.002718494                                       | 0.085959239                                                | 0.100793591                           | 81.00312543                                      |
| 0.002759333                                       | 0.082779485                                                | 0.098352886                           | 202.0423922                                      |
| 0.00401288                                        | 0.085415635                                                | 0.10033152                            | 100.0196053                                      |
| 0.002083364                                       | 0.061793412                                                | 0.072134175                           | 137.5805188                                      |
| 0.002496422                                       | 0.066596026                                                | 0.081899568                           | 220.8026942                                      |
| 0.002383653                                       | 0.088044295                                                | 0.097681849                           | 204.0862748                                      |
| 0.006436412                                       | 0.07463912                                                 | 0.05166593                            | 31.74554662                                      |
| 0.002503611                                       | 0.098399915                                                | 0.106264083                           | 185.179219                                       |
| 0.002069785                                       | 0.092146072                                                | 0.139315183                           | 394.6477509                                      |
| 0.002901908                                       | 0.100840925                                                | 0.126754254                           | 188.379471                                       |
| 0.00250311                                        | 0.070475934                                                | 0.103194079                           | 209.3899551                                      |
| 0.003424783                                       | 0.077476722                                                | 0.109936686                           | 166.6476603                                      |
| 0.00325728                                        | 0.069685779                                                | 0.08605449                            | 285.5135598                                      |
| 0.003205106                                       | 0.098874881                                                | 0.134576279                           | 267.1075456                                      |
| 0.001454146                                       | 0.09419475                                                 | 0.122580656                           | 318.0722357                                      |
| 0.001313428                                       | 0.112997786                                                | 0.253921553                           | 498.2027113                                      |
| 0.003026926                                       | 0.089116129                                                | 0.081569114                           | 102.0380302                                      |
| 0.004369805                                       | 0.068336014                                                | 0.082540915                           | 463.7615105                                      |
| 0.004839975                                       | 0.098583004                                                | 0.124253948                           | 231.5891736                                      |
| 0.006783217                                       | 0.05495832                                                 | 0.054517027                           | 202.3206864                                      |
| 0.002666975                                       | 0.076977494                                                | 0.087587201                           | 261.1499764                                      |
| 0.0027817                                         | 0.06718435                                                 | 0.072730464                           | 156.9877222                                      |
| 0.00270528                                        | 0.080490318                                                | 0.08789452                            | 95.29289157                                      |
| 0.003388688                                       | 0.075557793                                                | 0.087716016                           | 192.7285193                                      |
| 0.002567214                                       | 0.079531046                                                | 0.097221298                           | 335.069398                                       |
| 0.004771998                                       | 0.103989284                                                | 0.099354612                           | 83.25217517                                      |
| 0.006854767                                       | 0.066216478                                                | 0.058665763                           | 53.40463732                                      |
| 0.003040193                                       | 0.091243292                                                | 0.109433755                           | 112.7301075                                      |
| 0.002723181                                       | 0.069886191                                                | 0.073772935                           | 168.4246158                                      |
| 0.002693829                                       | 0.05900695                                                 | 0.055981577                           | 188.9876976                                      |
| 0.003504592                                       | 0.07387813                                                 | 0.070538844                           | 313.0064448                                      |
| 0.004916869                                       | 0.087252463                                                | 0.08667779                            | 89.11764951                                      |
| 0.003413601                                       | 0.081282008                                                | 0.088259753                           | 100.2863216                                      |
| 0.004558966                                       | 0.089559041                                                | 0.094948341                           | 160.9420319                                      |
| 0.003382208                                       | 0.06956389                                                 | 0.074431458                           | 263.597988                                       |
| 0.002044719                                       | 0.090329953                                                | 0.11310443                            | 284.7595672                                      |
| 0.002568463                                       | 0.080302362                                                | 0.081554704                           | 123.1366777                                      |
| 0.001898875                                       | 0.066686062                                                | 0.092197707                           | 565.6432064                                      |
| 0.002908873                                       | 0.098273568                                                | 0.141402112                           | 155.7322086                                      |
| 0.001598122                                       | 0.077364363                                                | 0.089026601                           | 191.9302688                                      |
| 0.001735337                                       | 0.07629043                                                 | 0.100296185                           | 407.2279029                                      |
| 0.00191153                                        | 0.07909675                                                 | 0.097292284                           | 557.1099467                                      |
| 0.007967772                                       | 0.096481976                                                | 0.098999962                           | 70.09268891                                      |
| 0.002232049                                       | 0.095931181                                                | 0.12557602                            | 335.0518031                                      |
| 0.00336724                                        | 0.098337584                                                | 0.117825387                           | 116.6430789                                      |
| 0.002313489                                       | 0.077458684                                                | 0.096943818                           | 447.1986988                                      |
| 0.00165489                                        | 0.073706793                                                | 0.075265419                           | 404.8401585                                      |
| 0.003713063                                       | 0.107810367                                                | 0.133065639                           | 281.298571                                       |
| 0.006489874                                       | 0.085340208                                                | 0.106225641                           | 101.713326                                       |
| 0.002039652                                       | 0.095519009                                                | 0.132622055                           | 369.6080162                                      |
| 0.005215815                                       | 0.079007863                                                | 0.117659683                           | 164.181177                                       |
| 0.003471917                                       | 0.057505141                                                | 0.064013619                           | 122.7675671                                      |
| 0.00457349                                        | 0.060664285                                                | 0.068856286                           | 178.6872095                                      |
| 0.004867025                                       | 0.085856286                                                | 0.088685909                           | 106.8343024                                      |
| 0.003303181                                       | 0.095612497                                                | 0.100470504                           | 210.7327427                                      |
| 0.005800232                                       | 0.095827103                                                | 0.105702494                           | 84.12870737                                      |
| 0.00334171                                        | 0.08857227                                                 | 0.086414834                           | 140.3160433                                      |
| 0.002568949                                       | 0.062852873                                                | 0.070102988                           | 138.2428561                                      |
| 0.001795333                                       | 0.060658294                                                | 0.06457303                            | 113.9697521                                      |
| 0.00389091                                        | 0.076101959                                                | 0.097375617                           | 126.2897718                                      |
| 0.002749657                                       | 0.093468173                                                | 0.142925418                           | 274.5888443                                      |
| 0.003869294                                       | 0.095013515                                                | 0.105351175                           | 267.186587                                       |
| 0.004186314                                       | 0.06891272                                                 | 0.087552535                           | 156.1789758                                      |
| 0.004525723                                       | 0.156983285                                                | 0.289267747                           | 200.0564603                                      |
| 0.004832028                                       | 0.068896127                                                | 0.094045624                           | 152.2956155                                      |
| 0.003756469                                       | 0.080476709                                                | 0.10573095                            | 202.3261105                                      |
| 0.00282019                                        | 0.092237746                                                | 0.10356989                            | 124.0571028                                      |
| 0.002401941                                       | 0.09907422                                                 | 0.12374164                            | 181.730171                                       |
| 0.00280176                                        | 0.13366234                                                 | 0.184985755                           | 151.7181786                                      |
| 0.003233793                                       | 0.06362989                                                 | 0.062844474                           | 143.5695788                                      |
| 0.003291275                                       | 0.070395484                                                | 0.075418207                           | 342.1332201                                      |
| 0.004731586                                       | 0.089046509                                                | 0.108551951                           | 268.8215282                                      |
| 0.002867607                                       | 0.066938889                                                | 0.067318305                           | 274.4560342                                      |
| 0.001577121                                       | 0.085043346                                                | 0.134876891                           | 263.1843632                                      |
| 0.005077882                                       | 0.080793234                                                | 0.090156285                           | 210.9123823                                      |
| 0.00396676                                        | 0.083366693                                                | 0.097337425                           | 80.51509659                                      |
| 0.006843915                                       | 0.106304951                                                | 0.12547552                            | 80.12103505                                      |
| 0.002268979                                       | 0.11375531                                                 | 0.164349761                           | 581.8025064                                      |

| log.sigma.1.5.mm.3D_glrIm_LongRunEmphasis | log.sigma.1.5.mm.3D_glrIm_ShortRunHighGrayLevelEmphasis | log.sigma.1.5.mm.3D_glrIm_RunLengthNonUniformity | log.sigma.1.5.mm.3D_glrIm_ShortRunEmphasis |
|-------------------------------------------|---------------------------------------------------------|--------------------------------------------------|--------------------------------------------|
| 1.184441537                               | 956.9572972                                             | 1799.036415                                      | 0.958739641                                |
| 1.355588845                               | 332.6801989                                             | 698.4541103                                      | 0.927220237                                |
| 1.494808063                               | 292.4142074                                             | 1077.818346                                      | 0.912855811                                |
| 1.267404987                               | 600.5116479                                             | 777.2332773                                      | 0.942809786                                |
| 1.290488295                               | 359.5698336                                             | 1859.629647                                      | 0.939852973                                |
| 1.177743696                               | 566.3181761                                             | 562.6913766                                      | 0.959866554                                |
| 1.310823501                               | 446.6280117                                             | 4389.837042                                      | 0.937353833                                |
| 1.373768068                               | 620.0012504                                             | 3786.172419                                      | 0.925788945                                |
| 1.253717876                               | 495.05191                                               | 3654.627583                                      | 0.945468645                                |
| 1.221835817                               | 553.3656129                                             | 878.5114616                                      | 0.950022164                                |
| 1.270597428                               | 291.1062624                                             | 1191.389092                                      | 0.940852815                                |
| 1.241014363                               | 704.3212064                                             | 1869.478268                                      | 0.947778258                                |
| 1.543855837                               | 534.3181445                                             | 1238.548882                                      | 0.898303999                                |
| 1.261218124                               | 628.8467349                                             | 1372.553477                                      | 0.944102832                                |
| 1.223031353                               | 691.7359262                                             | 1628.585743                                      | 0.950481937                                |
| 1.363130703                               | 552.9379743                                             | 3261.528064                                      | 0.926940927                                |
| 1.198797072                               | 270.8270142                                             | 1000.253228                                      | 0.95571168                                 |
| 1.43009563                                | 428.0363988                                             | 876.219213                                       | 0.914938926                                |
| 1.278591208                               | 471.82873                                               | 1016.983519                                      | 0.938872333                                |
| 1.234440462                               | 641.7737277                                             | 4236.494588                                      | 0.948912523                                |
| 1.496050787                               | 347.3882579                                             | 2090.020309                                      | 0.908850832                                |
| 1.207134487                               | 338.6468586                                             | 893.8075864                                      | 0.952555355                                |
| 1.282382762                               | 664.8735797                                             | 806.9162328                                      | 0.940669109                                |
| 1.275825401                               | 492.8499923                                             | 2096.029263                                      | 0.941749399                                |
| 1.28364303                                | 603.7984485                                             | 1000.21272                                       | 0.939759663                                |
| 1.205138266                               | 732.3643399                                             | 1979.815167                                      | 0.955157254                                |
| 1.231928827                               | 597.3416201                                             | 2644.580277                                      | 0.949917934                                |
| 1.276161568                               | 612.2470755                                             | 2182.480545                                      | 0.941294917                                |
| 1.156741104                               | 310.5553665                                             | 385.417289                                       | 0.962640764                                |
| 1.298787762                               | 569.8276753                                             | 1595.265583                                      | 0.936900168                                |
| 1.37501988                                | 668.2828698                                             | 3537.157177                                      | 0.926605112                                |
| 1.35539355                                | 492.6909478                                             | 1544.910441                                      | 0.927109225                                |
| 1.28600441                                | 573.1596145                                             | 2546.696919                                      | 0.940831203                                |
| 1.30483889                                | 533.221844                                              | 1825.454034                                      | 0.937193358                                |
| 1.24221809                                | 482.0820176                                             | 3577.36637                                       | 0.94823642                                 |
| 1.368741695                               | 438.115509                                              | 2228.649354                                      | 0.926201329                                |
| 1.339070541                               | 969.9508538                                             | 2821.534513                                      | 0.931102767                                |
| 1.628398668                               | 941.3709056                                             | 3368.290664                                      | 0.896092665                                |
| 1.236191987                               | 555.7379164                                             | 998.030668                                       | 0.947676003                                |
| 1.231132491                               | 329.5144887                                             | 5961.011201                                      | 0.95046822                                 |
| 1.345645663                               | 308.4578601                                             | 1953.718179                                      | 0.929271703                                |
| 1.158310686                               | 306.1386047                                             | 3348.863299                                      | 0.964000134                                |
| 1.248130084                               | 537.9244484                                             | 2950.66978                                       | 0.946642417                                |
| 1.207232087                               | 630.6332975                                             | 2074.470501                                      | 0.954587572                                |
| 1.254581894                               | 708.0972833                                             | 1022.599902                                      | 0.944005949                                |
| 1.247039835                               | 422.773922                                              | 2221.283861                                      | 0.94714393                                 |
| 1.270705237                               | 538.8488882                                             | 3632.240759                                      | 0.943290495                                |
| 1.283803978                               | 367.0479462                                             | 682.0510466                                      | 0.938848661                                |
| 1.172899318                               | 394.8265643                                             | 726.9193732                                      | 0.960350387                                |
| 1.30857323                                | 505.1531995                                             | 1043.598068                                      | 0.935246419                                |
| 1.210623258                               | 664.5033167                                             | 2134.482188                                      | 0.953754235                                |
| 1.164166326                               | 552.1014906                                             | 2900.280472                                      | 0.962304282                                |
| 1.20502973                                | 410.3200833                                             | 3754.171947                                      | 0.954013878                                |
| 1.25680135                                | 344.81661                                               | 879.268048                                       | 0.942556287                                |
| 1.251469115                               | 504.3641803                                             | 1070.644157                                      | 0.94571993                                 |
| 1.273797351                               | 399.8896803                                             | 1538.315984                                      | 0.940509185                                |
| 1.214635984                               | 461.1251162                                             | 3343.568043                                      | 0.952341082                                |
| 1.317749776                               | 639.2261938                                             | 2651.879069                                      | 0.933756889                                |
| 1.237543261                               | 614.3827266                                             | 1334.386045                                      | 0.947072213                                |
| 1.251289446                               | 661.0986032                                             | 7407.118846                                      | 0.948167513                                |
| 1.386290685                               | 524.5659443                                             | 1299.14466                                       | 0.923717858                                |
| 1.248017154                               | 962.276569                                              | 2162.616377                                      | 0.947611936                                |
| 1.277716247                               | 746.8886119                                             | 4592.540278                                      | 0.942409268                                |
| 1.269997116                               | 665.2502597                                             | 6077.43313                                       | 0.943526979                                |
| 1.282794                                  | 206.7137985                                             | 620.3662572                                      | 0.939503001                                |
| 1.349683971                               | 599.8860535                                             | 2898.036426                                      | 0.928524887                                |
| 1.327451619                               | 498.0755479                                             | 994.547896                                       | 0.932607796                                |
| 1.269861808                               | 610.3484668                                             | 4978.25627                                       | 0.943372376                                |
| 1.213196066                               | 790.8870801                                             | 4864.187863                                      | 0.953624616                                |
| 1.368174496                               | 389.5940788                                             | 2149.323592                                      | 0.925632225                                |
| 1.295815304                               | 321.9465871                                             | 1015.109972                                      | 0.938461661                                |
| 1.363242201                               | 677.7614188                                             | 3201.509371                                      | 0.927393404                                |
| 1.321783104                               | 373.8140435                                             | 1752.825931                                      | 0.934811044                                |
| 1.184131971                               | 529.1328763                                             | 1917.037543                                      | 0.958979604                                |
| 1.19931794                                | 372.7213435                                             | 2620.297302                                      | 0.955411764                                |
| 1.253085049                               | 359.5098155                                             | 1078.462862                                      | 0.945250402                                |
| 1.2833925                                 | 411.1701028                                             | 1884.494627                                      | 0.940123164                                |
| 1.298174091                               | 435.7511041                                             | 744.4138249                                      | 0.936932102                                |
| 1.248195374                               | 481.2849451                                             | 1374.063108                                      | 0.94577027                                 |
| 1.2015581                                 | 618.2783877                                             | 1955.907415                                      | 0.955286507                                |
| 1.185760577                               | 961.2672813                                             | 1685.056949                                      | 0.958547021                                |
| 1.273659105                               | 469.3032385                                             | 1426.666902                                      | 0.942170971                                |
| 1.383692511                               | 559.9662697                                             | 2420.438822                                      | 0.925475329                                |
| 1.300679931                               | 318.594583                                              | 2378.868809                                      | 0.93596356                                 |
| 1.247418682                               | 446.4079523                                             | 1974.790666                                      | 0.947145516                                |
| 1.748876833                               | 284.8015807                                             | 922.036041                                       | 0.873816781                                |
| 1.260436515                               | 391.864678                                              | 1921.375148                                      | 0.945983811                                |
| 1.295925001                               | 430.7140547                                             | 2138.740604                                      | 0.938186166                                |
| 1.290041624                               | 579.3959522                                             | 1148.305216                                      | 0.93936748                                 |
| 1.34442959                                | 607.9151839                                             | 1527.031287                                      | 0.929624398                                |
| 1.506821115                               | 505.814532                                              | 881.8597025                                      | 0.903026142                                |
| 1.17781184                                | 480.3912625                                             | 2034.782174                                      | 0.960687029                                |
| 1.213195514                               | 444.7409941                                             | 4305.383563                                      | 0.953783601                                |
| 1.304728561                               | 371.4705881                                             | 2556.435252                                      | 0.936282344                                |
| 1.194346509                               | 483.6679724                                             | 3657.247306                                      | 0.956534594                                |
| 1.359530675                               | 945.9395552                                             | 2580.117188                                      | 0.930158072                                |
| 1.255612599                               | 323.2342257                                             | 2258.854031                                      | 0.944788411                                |
| 1.274440434                               | 640.239534                                              | 829.7492764                                      | 0.941829265                                |
| 1.352644793                               | 239.4052224                                             | 624.0591832                                      | 0.927457036                                |
| 1.441124188                               | 518.5561251                                             | 4107.131389                                      | 0.915728122                                |

| log.sigma.1.5.mm.3D_glrIm_LongRunHighGrayLevelEmphasis | log.sigma.1.5.mm.3D_glrIm_RunPercentage | log.sigma.1.5.mm.3D_glrIm_LongRunLowGrayLevelEmphasis | log.sigma.1.5.mm.3D_glrIm_RunEntropy |
|--------------------------------------------------------|-----------------------------------------|-------------------------------------------------------|--------------------------------------|
| 1184.153898                                            | 0.944899587                             | 0.001971813                                           | 4.785559165                          |
| 482.5357091                                            | 0.902838338                             | 0.006378167                                           | 4.140599778                          |
| 467.709067                                             | 0.879249824                             | 0.006868373                                           | 4.301325193                          |
| 816.4576444                                            | 0.923628061                             | 0.003762164                                           | 4.562137925                          |
| 500.8482083                                            | 0.918756497                             | 0.008211019                                           | 4.458337524                          |
| 689.7878061                                            | 0.946736597                             | 0.004382327                                           | 4.578005392                          |
| 620.5238279                                            | 0.914596464                             | 0.003594902                                           | 4.444704557                          |
| 916.2002154                                            | 0.899463888                             | 0.0026002                                             | 4.40953134                           |
| 658.8138462                                            | 0.927036448                             | 0.003679985                                           | 4.515962879                          |
| 716.0192854                                            | 0.93434271                              | 0.003884611                                           | 4.479213152                          |
| 395.9276008                                            | 0.922056723                             | 0.006216544                                           | 4.222967413                          |
| 926.0685515                                            | 0.930218588                             | 0.00328092                                            | 4.595153868                          |
| 911.6615809                                            | 0.863623254                             | 0.004345658                                           | 4.161683846                          |
| 841.246662                                             | 0.925182564                             | 0.003527294                                           | 4.587651807                          |
| 890.7276428                                            | 0.934475806                             | 0.002819988                                           | 4.631765432                          |
| 814.0786822                                            | 0.901613697                             | 0.003082726                                           | 4.354205314                          |
| 339.2925893                                            | 0.940922562                             | 0.008235207                                           | 4.477729189                          |
| 668.5649805                                            | 0.886206251                             | 0.004572611                                           | 4.121522504                          |
| 647.0015892                                            | 0.919698945                             | 0.00364031                                            | 4.183512154                          |
| 833.7148099                                            | 0.931776821                             | 0.002831453                                           | 4.547249512                          |
| 566.4906575                                            | 0.875254375                             | 0.004773369                                           | 4.138608295                          |
| 430.7729032                                            | 0.937976759                             | 0.005850452                                           | 4.285229189                          |
| 908.2190898                                            | 0.92022356                              | 0.003128145                                           | 4.357768501                          |
| 663.4838913                                            | 0.921972625                             | 0.003321826                                           | 4.375489171                          |
| 817.0252587                                            | 0.919693033                             | 0.004488822                                           | 4.438855194                          |
| 918.3598341                                            | 0.93976686                              | 0.002379145                                           | 4.738549244                          |
| 772.1012862                                            | 0.932689334                             | 0.002892122                                           | 4.661754035                          |
| 832.085866                                             | 0.921433744                             | 0.002818415                                           | 4.362055351                          |
| 371.8366933                                            | 0.951471347                             | 0.007000129                                           | 4.271054764                          |
| 796.0989824                                            | 0.916073702                             | 0.002995709                                           | 4.212828508                          |
| 986.6960244                                            | 0.899957966                             | 0.002614606                                           | 4.448816913                          |
| 726.1500479                                            | 0.902702904                             | 0.003575624                                           | 4.256270412                          |
| 781.1154198                                            | 0.920003812                             | 0.003004438                                           | 4.654177365                          |
| 740.5396823                                            | 0.915155483                             | 0.004001508                                           | 4.583215065                          |
| 628.8488337                                            | 0.930238245                             | 0.003779911                                           | 4.619589058                          |
| 643.3917277                                            | 0.900607895                             | 0.004036415                                           | 4.322536598                          |
| 1396.377082                                            | 0.907200298                             | 0.001786356                                           | 4.41569109                           |
| 1691.402408                                            | 0.853785045                             | 0.001933165                                           | 4.423690996                          |
| 732.257677                                             | 0.93083177                              | 0.003424501                                           | 4.206153343                          |
| 425.2611517                                            | 0.933414453                             | 0.005141599                                           | 4.526620509                          |
| 448.5767043                                            | 0.905432655                             | 0.005945323                                           | 4.276761086                          |
| 365.861176                                             | 0.951980267                             | 0.007444939                                           | 4.69245375                           |
| 711.4799499                                            | 0.928615048                             | 0.003127869                                           | 4.474750809                          |
| 801.6445585                                            | 0.939092258                             | 0.003119564                                           | 4.644625792                          |
| 940.8787147                                            | 0.926267004                             | 0.003055139                                           | 4.429984077                          |
| 554.6400414                                            | 0.929101864                             | 0.003998429                                           | 4.498920602                          |
| 722.925489                                             | 0.923397295                             | 0.003076842                                           | 4.506337945                          |
| 505.4525994                                            | 0.919102711                             | 0.005516927                                           | 4.113473665                          |
| 484.793185                                             | 0.947663382                             | 0.007340018                                           | 4.565783876                          |
| 702.4814131                                            | 0.913746017                             | 0.003643104                                           | 4.314046354                          |
| 841.0610525                                            | 0.938048328                             | 0.003047458                                           | 4.598447199                          |
| 668.646538                                             | 0.950094699                             | 0.00300863                                            | 4.677089981                          |
| 520.7652358                                            | 0.938983224                             | 0.004006261                                           | 4.454724013                          |
| 457.0735407                                            | 0.925027871                             | 0.005671242                                           | 4.287984934                          |
| 666.8638848                                            | 0.927588201                             | 0.003910701                                           | 4.420872641                          |
| 544.2929638                                            | 0.921459566                             | 0.005219781                                           | 4.290979401                          |
| 590.1834909                                            | 0.936731007                             | 0.003862311                                           | 4.533432418                          |
| 903.9609422                                            | 0.911531788                             | 0.002521656                                           | 4.375285202                          |
| 808.3057212                                            | 0.930358476                             | 0.002935772                                           | 4.43112858                           |
| 867.77129                                              | 0.929076401                             | 0.002287758                                           | 4.644501877                          |
| 783.8660885                                            | 0.896942242                             | 0.003616043                                           | 4.390285451                          |
| 1270.970983                                            | 0.929069432                             | 0.001844785                                           | 4.525820566                          |
| 1009.334758                                            | 0.921934172                             | 0.00210455                                            | 4.567241125                          |
| 899.1097585                                            | 0.923853924                             | 0.002304775                                           | 4.509891243                          |
| 282.4847777                                            | 0.919571568                             | 0.009370058                                           | 4.090568073                          |
| 872.9260678                                            | 0.904214636                             | 0.002790253                                           | 4.374374265                          |
| 712.191007                                             | 0.909509202                             | 0.003988113                                           | 4.276887837                          |
| 826.8642016                                            | 0.923643077                             | 0.002737879                                           | 4.53071915                           |
| 1011.346085                                            | 0.937707674                             | 0.001916439                                           | 4.505799962                          |
| 575.7206992                                            | 0.900249509                             | 0.00462036                                            | 4.133970844                          |
| 447.564076                                             | 0.91733286                              | 0.007397234                                           | 4.36923284                           |
| 990.0296992                                            | 0.90181101                              | 0.002563021                                           | 4.414735559                          |
| 524.1916437                                            | 0.911702164                             | 0.006142764                                           | 4.552026643                          |
| 657.5779216                                            | 0.945040351                             | 0.003841413                                           | 4.742755259                          |
| 467.171071                                             | 0.940741469                             | 0.005183694                                           | 4.659193592                          |
| 478.9151271                                            | 0.927146624                             | 0.005591753                                           | 4.32132847                           |
| 557.8819418                                            | 0.91977013                              | 0.003988854                                           | 4.248987976                          |
| 608.0129698                                            | 0.916171511                             | 0.006445516                                           | 4.275953067                          |
| 636.2473482                                            | 0.927988824                             | 0.003849408                                           | 4.256753718                          |
| 776.7470277                                            | 0.940309797                             | 0.002912009                                           | 4.673143568                          |
| 1189.761193                                            | 0.944579804                             | 0.001992767                                           | 4.752496892                          |
| 639.1863309                                            | 0.922350024                             | 0.004465102                                           | 4.579761109                          |
| 831.6979754                                            | 0.89843989                              | 0.003420642                                           | 4.415838092                          |
| 444.9054227                                            | 0.915041678                             | 0.004791793                                           | 4.14518039                           |
| 589.0264614                                            | 0.929100829                             | 0.004777246                                           | 4.608158139                          |
| 576.5222613                                            | 0.830889737                             | 0.006832938                                           | 3.835121408                          |
| 522.961412                                             | 0.926656991                             | 0.005534216                                           | 4.621541876                          |
| 590.0258946                                            | 0.916849015                             | 0.004466466                                           | 4.470180727                          |
| 795.6017603                                            | 0.918558218                             | 0.003305655                                           | 4.307164791                          |
| 881.9512537                                            | 0.905641026                             | 0.002939371                                           | 4.262540532                          |
| 833.4916983                                            | 0.870280793                             | 0.003746688                                           | 3.998290809                          |
| 586.9280115                                            | 0.947200155                             | 0.003629526                                           | 4.558454815                          |
| 568.0191924                                            | 0.937666038                             | 0.003779389                                           | 4.548436188                          |
| 517.1820902                                            | 0.914731935                             | 0.005558102                                           | 4.344778427                          |
| 606.1975884                                            | 0.942095588                             | 0.003280438                                           | 4.5262662                            |
| 1373.909288                                            | 0.904104662                             | 0.001947691                                           | 4.587308989                          |
| 431.3389936                                            | 0.926599492                             | 0.005892976                                           | 4.394474876                          |
| 872.6281688                                            | 0.922268753                             | 0.004377059                                           | 4.45541549                           |
| 353.8615342                                            | 0.903431101                             | 0.008262627                                           | 4.072950412                          |
| 808.408446                                             | 0.885534625                             | 0.003083463                                           | 4.220845873                          |

| log.sigma.1.5.mm.3D_gIrlm_HighGrayLevelRunEmphasis | log.sigma.1.5.mm.3D_gIrlm_RunLengthNonUniformityNormalized | log.sigma.1.5.mm.3D_gIrlm_GrayLevelVariance |
|----------------------------------------------------|------------------------------------------------------------|---------------------------------------------|
| 998.5573654                                        | 0.897070596                                                | 52.18027462                                 |
| 358.2476039                                        | 0.826896325                                                | 31.02508896                                 |
| 318.9881082                                        | 0.797694798                                                | 28.47535602                                 |
| 638.6308428                                        | 0.860865199                                                | 41.84080502                                 |
| 383.7698161                                        | 0.854388537                                                | 33.55705001                                 |
| 589.0202285                                        | 0.900028111                                                | 47.75905325                                 |
| 475.9400734                                        | 0.848986723                                                | 30.86568651                                 |
| 669.2533458                                        | 0.823786489                                                | 40.0889806                                  |
| 524.0736618                                        | 0.866822415                                                | 36.47293099                                 |
| 583.4069098                                        | 0.876777481                                                | 39.71342705                                 |
| 309.9455797                                        | 0.856331873                                                | 23.20225124                                 |
| 743.9562                                           | 0.871744837                                                | 49.31725584                                 |
| 593.8792897                                        | 0.767518726                                                | 43.56271111                                 |
| 666.319036                                         | 0.863701036                                                | 47.40946173                                 |
| 727.9105636                                        | 0.878018713                                                | 52.25407562                                 |
| 596.766949                                         | 0.826227936                                                | 34.715314                                   |
| 283.2973903                                        | 0.890091742                                                | 30.93711018                                 |
| 467.909379                                         | 0.801240977                                                | 29.3630304                                  |
| 503.3200157                                        | 0.851645974                                                | 23.88081199                                 |
| 676.1679887                                        | 0.874356839                                                | 42.02324957                                 |
| 381.4932359                                        | 0.788995802                                                | 24.14598884                                 |
| 355.7918689                                        | 0.88271177                                                 | 26.10198052                                 |
| 707.165425                                         | 0.856045435                                                | 32.51406397                                 |
| 522.6398003                                        | 0.858452752                                                | 29.80207831                                 |
| 641.2531349                                        | 0.853932659                                                | 43.15887743                                 |
| 765.6980753                                        | 0.888964048                                                | 46.44440562                                 |
| 628.4425272                                        | 0.876819504                                                | 42.93463348                                 |
| 650.9278019                                        | 0.857306861                                                | 36.65951173                                 |
| 322.3945587                                        | 0.90596882                                                 | 23.34235091                                 |
| 609.283507                                         | 0.847489528                                                | 29.27231997                                 |
| 720.5538654                                        | 0.825683882                                                | 41.46424749                                 |
| 532.542492                                         | 0.826634333                                                | 32.43138754                                 |
| 608.8692393                                        | 0.856743293                                                | 43.11303477                                 |
| 568.7230423                                        | 0.848484913                                                | 45.46633563                                 |
| 508.026998                                         | 0.873005896                                                | 41.31750956                                 |
| 472.4839955                                        | 0.824693653                                                | 33.41557205                                 |
| 1041.950476                                        | 0.835307265                                                | 46.93357145                                 |
| 1048.171187                                        | 0.763815615                                                | 44.29690254                                 |
| 587.7540809                                        | 0.871473407                                                | 27.71137507                                 |
| 346.4574724                                        | 0.878106862                                                | 29.78131338                                 |
| 332.2659267                                        | 0.83125279                                                 | 28.52754313                                 |
| 317.1669437                                        | 0.909511348                                                | 35.68151514                                 |
| 568.6355188                                        | 0.869444448                                                | 33.37569192                                 |
| 661.3872251                                        | 0.887595166                                                | 46.03449866                                 |
| 750.0754479                                        | 0.863355721                                                | 41.83822048                                 |
| 446.0486149                                        | 0.870591284                                                | 34.48073737                                 |
| 570.7497781                                        | 0.861966211                                                | 38.19733529                                 |
| 391.634347                                         | 0.851718065                                                | 28.48959378                                 |
| 411.5791964                                        | 0.900986516                                                | 39.69208938                                 |
| 539.3479011                                        | 0.844197268                                                | 31.53841354                                 |
| 696.3576455                                        | 0.885549864                                                | 45.14774622                                 |
| 573.8377545                                        | 0.905370039                                                | 39.08844748                                 |
| 430.5672868                                        | 0.885963649                                                | 32.33518273                                 |
| 365.4075738                                        | 0.860292738                                                | 29.79001547                                 |
| 533.2514618                                        | 0.867408954                                                | 34.65446415                                 |
| 425.6620622                                        | 0.85562425                                                 | 31.50653898                                 |
| 484.6222314                                        | 0.882172018                                                | 34.49213238                                 |
| 684.8837308                                        | 0.840874428                                                | 33.98779996                                 |
| 649.7182008                                        | 0.870021691                                                | 38.33010792                                 |
| 696.6591128                                        | 0.873088315                                                | 37.95870748                                 |
| 567.541061                                         | 0.819570439                                                | 39.68372591                                 |
| 1016.214133                                        | 0.871630172                                                | 43.72616306                                 |
| 792.0413016                                        | 0.860141429                                                | 39.29328405                                 |
| 705.6430747                                        | 0.862544459                                                | 39.4812609                                  |
| 220.0560281                                        | 0.853477465                                                | 19.4717318                                  |
| 646.2955355                                        | 0.829524338                                                | 37.51444564                                 |
| 534.639401                                         | 0.838293812                                                | 36.18852854                                 |
| 647.9391391                                        | 0.862082274                                                | 38.36863288                                 |
| 830.2583825                                        | 0.885368407                                                | 35.57765094                                 |
| 420.9450028                                        | 0.823402901                                                | 27.09309984                                 |
| 343.5676468                                        | 0.851357567                                                | 30.58639607                                 |
| 729.8866427                                        | 0.827203372                                                | 40.90354172                                 |
| 399.1817818                                        | 0.843255659                                                | 40.20672714                                 |
| 552.477758                                         | 0.897769569                                                | 43.5252584                                  |
| 389.9851763                                        | 0.889354511                                                | 36.32228911                                 |
| 380.7296481                                        | 0.866314238                                                | 29.80006683                                 |
| 436.7952206                                        | 0.854802388                                                | 30.58035275                                 |
| 465.8509546                                        | 0.847716182                                                | 35.68191746                                 |
| 509.0998149                                        | 0.867195293                                                | 27.89516482                                 |
| 647.0435406                                        | 0.889078198                                                | 42.64674024                                 |
| 1003.039038                                        | 0.89669379                                                 | 50.93254665                                 |
| 499.0227345                                        | 0.85945399                                                 | 43.79762985                                 |
| 604.4328559                                        | 0.823488799                                                | 37.09035646                                 |
| 340.7716377                                        | 0.845578387                                                | 19.1489758                                  |
| 471.5077577                                        | 0.870858774                                                | 38.85770481                                 |
| 327.0039167                                        | 0.721971968                                                | 16.51501374                                 |
| 414.3666386                                        | 0.868611333                                                | 38.93036722                                 |
| 458.3465909                                        | 0.850511598                                                | 36.03354295                                 |
| 616.8876906                                        | 0.853383055                                                | 35.88615354                                 |
| 654.5499408                                        | 0.832107976                                                | 31.55183639                                 |
| 558.5797395                                        | 0.776656123                                                | 24.88252105                                 |
| 499.6943119                                        | 0.901676787                                                | 32.65383809                                 |
| 466.6922215                                        | 0.885718976                                                | 37.89505358                                 |
| 396.7244064                                        | 0.846454333                                                | 30.68005875                                 |
| 506.0111709                                        | 0.891861223                                                | 31.33262829                                 |
| 1015.854918                                        | 0.833505963                                                | 52.79822043                                 |
| 342.4597631                                        | 0.865076248                                                | 29.67636516                                 |
| 680.9092067                                        | 0.858761329                                                | 43.56599973                                 |
| 258.9517428                                        | 0.827522911                                                | 21.05435509                                 |
| 565.1653566                                        | 0.802800596                                                | 30.86819259                                 |



| log.sigma.1.5.mm.3D_glszm_SmallAreaHighGrayLevelEmphasis | log.sigma.1.5.mm.3D_glszm_GrayLevelNonUniformityNormalized | log.sigma.1.5.mm.3D_glszm_SizeZoneNonUniformityNormalized |
|----------------------------------------------------------|------------------------------------------------------------|-----------------------------------------------------------|
| 726.8120733                                              | 0.041399154                                                | 0.512612524                                               |
| 240.3142836                                              | 0.065582631                                                | 0.434372326                                               |
| 216.7466093                                              | 0.056118093                                                | 0.457516563                                               |
| 408.9068062                                              | 0.047229603                                                | 0.48112135                                                |
| 240.9442769                                              | 0.051576924                                                | 0.482059369                                               |
| 445.5565661                                              | 0.045604734                                                | 0.501671006                                               |
| 332.834202                                               | 0.052747924                                                | 0.453024578                                               |
| 475.8739565                                              | 0.050140487                                                | 0.506046835                                               |
| 357.4455778                                              | 0.049037622                                                | 0.479993703                                               |
| 376.6474562                                              | 0.047762158                                                | 0.439404025                                               |
| 196.0629074                                              | 0.061897521                                                | 0.427008264                                               |
| 502.1506054                                              | 0.045556122                                                | 0.490778727                                               |
| 424.6777711                                              | 0.055525926                                                | 0.489461728                                               |
| 468.8277714                                              | 0.045249931                                                | 0.474133333                                               |
| 502.167726                                               | 0.043064989                                                | 0.473238157                                               |
| 398.6936762                                              | 0.054644192                                                | 0.465406999                                               |
| 196.9699612                                              | 0.051154998                                                | 0.424335846                                               |
| 302.7905038                                              | 0.061293135                                                | 0.462881596                                               |
| 337.8978024                                              | 0.062608141                                                | 0.451129769                                               |
| 481.9768224                                              | 0.047023599                                                | 0.485243703                                               |
| 271.6477831                                              | 0.062665862                                                | 0.472018294                                               |
| 228.9486235                                              | 0.058208815                                                | 0.419181242                                               |
| 476.8036243                                              | 0.055839205                                                | 0.461234694                                               |
| 368.1224397                                              | 0.053074135                                                | 0.454973541                                               |
| 469.0792363                                              | 0.049311044                                                | 0.491822637                                               |
| 560.4945182                                              | 0.043607822                                                | 0.477768899                                               |
| 457.1792876                                              | 0.045011269                                                | 0.493371172                                               |
| 438.344592                                               | 0.051043829                                                | 0.469603998                                               |
| 221.7523981                                              | 0.059519882                                                | 0.430495449                                               |
| 416.4952473                                              | 0.057251352                                                | 0.481182679                                               |
| 513.1665449                                              | 0.050474684                                                | 0.491515525                                               |
| 350.7963851                                              | 0.0582324                                                  | 0.4853917                                                 |
| 427.7422614                                              | 0.044705456                                                | 0.465511164                                               |
| 379.9044399                                              | 0.046451546                                                | 0.455437276                                               |
| 357.4533376                                              | 0.046037263                                                | 0.477689534                                               |
| 333.602719                                               | 0.057212919                                                | 0.482061824                                               |
| 741.6447135                                              | 0.04989103                                                 | 0.496840211                                               |
| 777.5098118                                              | 0.050481686                                                | 0.508684043                                               |
| 364.5900553                                              | 0.061316854                                                | 0.4168501                                                 |
| 235.2125872                                              | 0.051305334                                                | 0.425886958                                               |
| 215.4495723                                              | 0.057538405                                                | 0.430947078                                               |
| 237.2542351                                              | 0.046272013                                                | 0.468509273                                               |
| 375.7732776                                              | 0.051401354                                                | 0.447731494                                               |
| 458.6719005                                              | 0.044180841                                                | 0.48460474                                                |
| 515.1917727                                              | 0.051408633                                                | 0.46942462                                                |
| 320.2263923                                              | 0.050043734                                                | 0.503254271                                               |
| 417.2364204                                              | 0.049059872                                                | 0.493958964                                               |
| 255.5174048                                              | 0.061796301                                                | 0.468285067                                               |
| 279.9101278                                              | 0.047059715                                                | 0.483842949                                               |
| 396.7284079                                              | 0.054319915                                                | 0.500508077                                               |
| 496.5648824                                              | 0.045521718                                                | 0.481466018                                               |
| 406.1494096                                              | 0.045848749                                                | 0.462938795                                               |
| 287.9894391                                              | 0.050222747                                                | 0.465207752                                               |
| 260.793032                                               | 0.057410187                                                | 0.488869336                                               |
| 348.7445236                                              | 0.051718054                                                | 0.440076863                                               |
| 277.620381                                               | 0.056005152                                                | 0.454931293                                               |
| 322.2594699                                              | 0.048803835                                                | 0.45900555                                                |
| 472.8930418                                              | 0.054304053                                                | 0.464928449                                               |
| 436.8981736                                              | 0.049397292                                                | 0.463932252                                               |
| 502.615793                                               | 0.046888878                                                | 0.48002609                                                |
| 397.3857696                                              | 0.051571577                                                | 0.500054555                                               |
| 707.5505819                                              | 0.047433157                                                | 0.498022502                                               |
| 558.3768897                                              | 0.047189995                                                | 0.487173604                                               |
| 481.8638064                                              | 0.048350286                                                | 0.466577382                                               |
| 144.7074486                                              | 0.068761159                                                | 0.438677842                                               |
| 456.4306718                                              | 0.052598561                                                | 0.502212664                                               |
| 359.5302848                                              | 0.05626602                                                 | 0.474948301                                               |
| 441.0161239                                              | 0.048565578                                                | 0.483861526                                               |
| 576.8137523                                              | 0.050826827                                                | 0.484699493                                               |
| 276.0388596                                              | 0.065491486                                                | 0.446054341                                               |
| 222.3490402                                              | 0.054880259                                                | 0.453651579                                               |
| 525.7343614                                              | 0.051217625                                                | 0.501928939                                               |
| 290.3526809                                              | 0.047656659                                                | 0.497846592                                               |
| 388.5917621                                              | 0.043842496                                                | 0.492489278                                               |
| 278.2465839                                              | 0.046184411                                                | 0.477237142                                               |
| 247.3074407                                              | 0.055232234                                                | 0.442964747                                               |
| 325.7469011                                              | 0.05643546                                                 | 0.496105166                                               |
| 310.6905164                                              | 0.054937754                                                | 0.504837678                                               |
| 345.6832856                                              | 0.058860324                                                | 0.456567721                                               |
| 475.8705561                                              | 0.04573944                                                 | 0.480466002                                               |
| 741.0707478                                              | 0.042199465                                                | 0.52581374                                                |
| 346.374034                                               | 0.045003463                                                | 0.518594183                                               |
| 423.3775202                                              | 0.052030788                                                | 0.475445529                                               |
| 210.4815698                                              | 0.065473569                                                | 0.383031365                                               |
| 322.217384                                               | 0.046899695                                                | 0.459097926                                               |
| 185.6607839                                              | 0.085801852                                                | 0.413102671                                               |
| 281.4662775                                              | 0.046521577                                                | 0.467645193                                               |
| 326.6542759                                              | 0.049140951                                                | 0.492526123                                               |
| 424.041447                                               | 0.054545582                                                | 0.481378614                                               |
| 440.5612013                                              | 0.058436536                                                | 0.48425826                                                |
| 415.5767439                                              | 0.071527072                                                | 0.493921469                                               |
| 352.8265031                                              | 0.04994989                                                 | 0.465070549                                               |
| 314.7447726                                              | 0.047382979                                                | 0.46174996                                                |
| 279.4366209                                              | 0.054748378                                                | 0.479936152                                               |
| 348.4936817                                              | 0.051150769                                                | 0.460545325                                               |
| 743.4080668                                              | 0.045076168                                                | 0.511354957                                               |
| 236.9587948                                              | 0.052600169                                                | 0.475273771                                               |
| 456.0666812                                              | 0.050448048                                                | 0.473604295                                               |
| 151.6392623                                              | 0.068918467                                                | 0.407496102                                               |
| 394.1352532                                              | 0.058604912                                                | 0.485001015                                               |

| log.sigma.1.5.mm.3D_glszm_SizeZoneNonUniformity | log.sigma.1.5.mm.3D_glszm_GrayLevelNonUniformity | log.sigma.1.5.mm.3D_glszm_LargeAreaEmphasis | log.sigma.1.5.mm.3D_glszm_ZoneVariance |
|-------------------------------------------------|--------------------------------------------------|---------------------------------------------|----------------------------------------|
| 557.7224265                                     | 45.04227941                                      | 18.89522059                                 | 15.09128663                            |
| 129.442953                                      | 19.54362416                                      | 139.1845638                                 | 129.3401311                            |
| 221.4380165                                     | 27.16115702                                      | 285                                         | 274.9547674                            |
| 191.9674185                                     | 18.84461153                                      | 43.36591479                                 | 37.37016727                            |
| 447.8331539                                     | 47.91496233                                      | 179.3347686                                 | 172.8374828                            |
| 163.0430769                                     | 14.82153846                                      | 13.50153846                                 | 9.377514793                            |
| 989.4056777                                     | 115.2014652                                      | 108.7394689                                 | 102.0445496                            |
| 875.9670711                                     | 86.79318313                                      | 614.8561525                                 | 606.1483686                            |
| 902.8681552                                     | 92.23976608                                      | 62.5645933                                  | 56.72367312                            |
| 198.6106195                                     | 21.58849558                                      | 21.16814159                                 | 15.54326885                            |
| 234.8545455                                     | 34.04363636                                      | 49.87272727                                 | 42.35516033                            |
| 478.0184805                                     | 44.37166324                                      | 35.51848049                                 | 29.91801732                            |
| 220.2577778                                     | 24.98666667                                      | 789.34                                      | 772.126721                             |
| 320.04                                          | 30.5437037                                       | 59.7762963                                  | 53.30586776                            |
| 411.2439586                                     | 37.42347526                                      | 24.52704258                                 | 19.31457001                            |
| 674.3747412                                     | 79.17943409                                      | 353.3761215                                 | 344.2556381                            |
| 230.4143646                                     | 27.7771639                                       | 14.92449355                                 | 10.08935421                            |
| 155.9910979                                     | 20.65578635                                      | 269.421365                                  | 256.0348863                            |
| 218.7979381                                     | 30.36494845                                      | 58.26391753                                 | 51.10139654                            |
| 1063.654197                                     | 103.0757299                                      | 66.90374088                                 | 61.27827447                            |
| 390.3591294                                     | 51.82466747                                      | 627.1100363                                 | 613.7393852                            |
| 198.2727273                                     | 27.53276956                                      | 18.74630021                                 | 13.54250008                            |
| 184.9551122                                     | 22.3915212                                       | 70.67331671                                 | 64.15236224                            |
| 463.1630648                                     | 54.02946955                                      | 57.92436149                                 | 51.16333984                            |
| 242.4685598                                     | 24.31034483                                      | 65.42596349                                 | 58.75846434                            |
| 533.6678603                                     | 48.70993733                                      | 20.22112802                                 | 15.72308324                            |
| 713.9080857                                     | 65.13130615                                      | 56.1292329                                  | 51.13723554                            |
| 478.9960784                                     | 52.06470588                                      | 138.954902                                  | 131.6224875                            |
| 97.72246696                                     | 13.51101322                                      | 7.792951542                                 | 3.915348639                            |
| 349.8198074                                     | 41.62173315                                      | 68.47042641                                 | 60.48805269                            |
| 799.6957591                                     | 82.122311                                        | 452.1745544                                 | 443.6224347                            |
| 321.3293051                                     | 38.54984894                                      | 232.6661631                                 | 222.8981777                            |
| 603.3024691                                     | 57.9382716                                       | 93.41898148                                 | 87.21134771                            |
| 405.7946128                                     | 41.38832772                                      | 111.2390572                                 | 104.282725                             |
| 914.7754569                                     | 88.1613577                                       | 67.48616188                                 | 62.19736286                            |
| 483.0259481                                     | 57.32734531                                      | 523.1447106                                 | 514.1865779                            |
| 619.5597434                                     | 62.21411387                                      | 287.0048115                                 | 278.1007853                            |
| 727.4181818                                     | 72.18881119                                      | 827.734965                                  | 814.7094278                            |
| 205.5070994                                     | 30.22920892                                      | 28.77079108                                 | 22.54612033                            |
| 1321.527232                                     | 159.2004512                                      | 23.08217854                                 | 17.59302637                            |
| 361.1336516                                     | 48.21718377                                      | 268.2816229                                 | 258.6997169                            |
| 968.877176                                      | 95.69052224                                      | 7.996615087                                 | 4.500004443                            |
| 666.2244624                                     | 76.48521505                                      | 58.06653226                                 | 52.03963925                            |
| 570.3797791                                     | 52.00084962                                      | 28.47408666                                 | 24.00573005                            |
| 238.9371316                                     | 26.16699411                                      | 37.57563851                                 | 31.27149424                            |
| 584.2782084                                     | 58.10077519                                      | 65.28251507                                 | 59.69240631                            |
| 924.1972207                                     | 91.79102084                                      | 136.2565473                                 | 130.311395                             |
| 145.6366559                                     | 19.21864952                                      | 66.38906752                                 | 58.54546582                            |
| 215.3101124                                     | 20.94157303                                      | 8.856179775                                 | 5.199060725                            |
| 243.7474333                                     | 26.45379877                                      | 140.8459959                                 | 133.1388166                            |
| 555.6117851                                     | 52.53206239                                      | 31.87781629                                 | 26.92198412                            |
| 802.7358708                                     | 79.5017301                                       | 10.01441753                                 | 6.235048338                            |
| 913.6680244                                     | 98.63747454                                      | 32.9592668                                  | 27.68143902                            |
| 203.8585132                                     | 23.94004796                                      | 41.08872902                                 | 34.079568                              |
| 235.4411215                                     | 27.66915888                                      | 37.44672897                                 | 31.26662591                            |
| 326.6406685                                     | 40.21169916                                      | 77.32033426                                 | 69.94434401                            |
| 822.5379464                                     | 87.45647321                                      | 30.22377232                                 | 25.1285746                             |
| 564.8880658                                     | 65.97942387                                      | 232.8131687                                 | 224.7129374                            |
| 321.5050505                                     | 34.23232323                                      | 21.6046176                                  | 15.94941791                            |
| 1946.505795                                     | 190.134402                                       | 86.87225647                                 | 81.80392866                            |
| 306.5334421                                     | 31.61337684                                      | 167.954323                                  | 159.6546602                            |
| 569.23972                                       | 54.21609799                                      | 66.30446194                                 | 60.84776214                            |
| 1144.370796                                     | 110.8492976                                      | 97.12345679                                 | 91.0499284                             |
| 1382.468782                                     | 143.2618967                                      | 50.96692541                                 | 44.34798401                            |
| 124.584507                                      | 19.52816901                                      | 79.87323944                                 | 72.1354394                             |
| 655.8897397                                     | 68.69372129                                      | 369.9188361                                 | 361.1742716                            |
| 221.8008565                                     | 26.27623126                                      | 85.99571734                                 | 78.19882708                            |
| 1214.49243                                      | 121.8996016                                      | 90.05577689                                 | 83.85547848                            |
| 1303.841636                                     | 136.7241636                                      | 28.69702602                                 | 23.95628875                            |
| 379.5922444                                     | 55.73325499                                      | 551.8119859                                 | 540.2151999                            |
| 227.2794411                                     | 27.49500998                                      | 62.94411178                                 | 56.22142541                            |
| 729.8046768                                     | 74.47042641                                      | 618.5515818                                 | 609.8462412                            |
| 423.6674501                                     | 40.55581669                                      | 160.6333725                                 | 153.46155                              |
| 558.9753304                                     | 49.76123348                                      | 19.53568282                                 | 15.57435541                            |
| 717.2874251                                     | 69.41516966                                      | 22.9427811                                  | 18.60319636                            |
| 237.4291045                                     | 29.60447761                                      | 34.42910448                                 | 28.16043384                            |
| 431.6114943                                     | 49.09885057                                      | 97.25747126                                 | 89.67282864                            |
| 175.1786744                                     | 19.06340058                                      | 77.70028818                                 | 70.07823335                            |
| 299.9649924                                     | 38.67123288                                      | 39.62100457                                 | 32.87049895                            |
| 530.9149321                                     | 50.54208145                                      | 25.03438914                                 | 20.5537921                             |
| 540.0107108                                     | 43.33885102                                      | 19.46153846                                 | 15.71069725                            |
| 394.1315789                                     | 34.20263158                                      | 70.46710526                                 | 64.86391794                            |
| 529.6463196                                     | 57.96229803                                      | 385.6364452                                 | 377.0253288                            |
| 384.1804586                                     | 65.66999003                                      | 74.39780658                                 | 65.0108836                             |
| 478.3800384                                     | 48.86948177                                      | 37.1756238                                  | 31.69678954                            |
| 116.0818505                                     | 24.11032028                                      | 1092.989324                                 | 1063.265485                            |
| 473.7245805                                     | 47.12635735                                      | 64.57551826                                 | 59.03235237                            |
| 522.5702168                                     | 52.13854854                                      | 159.3817154                                 | 152.7028278                            |
| 257.0561798                                     | 29.12734082                                      | 110.7003745                                 | 103.1841518                            |
| 332.2011662                                     | 40.08746356                                      | 175.3921283                                 | 166.6784439                            |
| 163.9819277                                     | 23.74698795                                      | 530.7710843                                 | 515.3441719                            |
| 554.364094                                      | 59.54026846                                      | 12.34228188                                 | 8.348990473                            |
| 1053.713409                                     | 108.1279579                                      | 39.19907099                                 | 34.0004795                             |
| 572.0838926                                     | 65.26006711                                      | 199.2348993                                 | 191.5705486                            |
| 929.8410104                                     | 103.2734027                                      | 24.15255077                                 | 19.50627336                            |
| 659.13654                                       | 58.10318076                                      | 251.2909232                                 | 244.2431134                            |
| 535.6335404                                     | 59.28039042                                      | 54.12866016                                 | 47.88087824                            |
| 193.7041565                                     | 20.63325183                                      | 87.07334963                                 | 80.52025036                            |
| 109.2089552                                     | 18.47014925                                      | 127.7462687                                 | 118.0620962                            |
| 828.381733                                      | 100.0971897                                      | 1039.76815                                  | 1028.33995                             |

| log.sigma.1.5.mm.3D_glszm_ZonePercentage | log.sigma.1.5.mm.3D_glszm_LargeAreaLowGrayLevelEmphasis | log.sigma.1.5.mm.3D_glszm_LargeAreaHighGrayLevelEmphasis | log.sigma.1.5.mm.3D_glszm_HighGrayLevelZoneEmphasis |
|------------------------------------------|---------------------------------------------------------|----------------------------------------------------------|-----------------------------------------------------|
| 0.512723845                              | 0.020796569                                             | 18763.30331                                              | 984.9549632                                         |
| 0.318716578                              | 0.418201375                                             | 47426.43289                                              | 361.8255034                                         |
| 0.315514993                              | 0.989633917                                             | 82894.23967                                              | 323.4772727                                         |
| 0.408393004                              | 0.069915385                                             | 28860.52882                                              | 596.7443609                                         |
| 0.392314189                              | 0.467250946                                             | 71367.29925                                              | 352.9235737                                         |
| 0.492424242                              | 0.029709251                                             | 7436.344615                                              | 603.2676923                                         |
| 0.386480269                              | 0.246897192                                             | 48596.39423                                              | 478.8159341                                         |
| 0.338880188                              | 0.943956614                                             | 401984.4547                                              | 660.4471404                                         |
| 0.413770348                              | 0.12221657                                              | 33149.84848                                              | 508.3163211                                         |
| 0.421641791                              | 0.040461349                                             | 12543.85177                                              | 563.6371681                                         |
| 0.364721485                              | 0.170623397                                             | 15367.06727                                              | 296.1727273                                         |
| 0.422559653                              | 0.052195494                                             | 26271.72279                                              | 714.3110883                                         |
| 0.241028388                              | 1.371544344                                             | 457180.5556                                              | 593.3088889                                         |
| 0.393127548                              | 0.09378289                                              | 40153.85037                                              | 658.2681481                                         |
| 0.438004032                              | 0.036791086                                             | 17759.12198                                              | 715.5684695                                         |
| 0.331124314                              | 0.604681612                                             | 207760.7005                                              | 578.6445825                                         |
| 0.454773869                              | 0.065380453                                             | 4157.653775                                              | 287.4677716                                         |
| 0.273317113                              | 0.607300342                                             | 121070.2493                                              | 447.4866469                                         |
| 0.373651772                              | 0.116093105                                             | 30135.0866                                               | 489.5505155                                         |
| 0.421619542                              | 0.105188672                                             | 43751.35493                                              | 673.082573                                          |
| 0.273478836                              | 1.699196106                                             | 232919.0484                                              | 382.1197098                                         |
| 0.43836886                               | 0.057799401                                             | 6870.53277                                               | 348.6575053                                         |
| 0.391601563                              | 0.103600727                                             | 49955.26683                                              | 689.074813                                          |
| 0.384586324                              | 0.119018148                                             | 28992.70923                                              | 527.8634578                                         |
| 0.387274156                              | 0.113760135                                             | 39956.68966                                              | 649.6369168                                         |
| 0.471506965                              | 0.029772678                                             | 14828.36437                                              | 781.8397493                                         |
| 0.447571915                              | 0.096358144                                             | 33668.09261                                              | 630.8044229                                         |
| 0.36929761                               | 0.222790822                                             | 87851.90882                                              | 631.5411765                                         |
| 0.507829978                              | 0.032374639                                             | 2466.938326                                              | 326.2863436                                         |
| 0.353943525                              | 0.11196456                                              | 43057.89409                                              | 587.258597                                          |
| 0.341950399                              | 0.656236976                                             | 313137.9201                                              | 716.409957                                          |
| 0.319961334                              | 0.436981978                                             | 125220.6405                                              | 500.9380665                                         |
| 0.401362651                              | 0.154808981                                             | 57554.93904                                              | 607.0655864                                         |
| 0.379148936                              | 0.207832079                                             | 61164.10213                                              | 558.1762065                                         |
| 0.434831971                              | 0.145278636                                             | 32264.00836                                              | 507.4715405                                         |
| 0.33411137                               | 1.139703748                                             | 241581.504                                               | 472.740519                                          |
| 0.335124966                              | 0.273035065                                             | 303888.9575                                              | 1026.1668                                           |
| 0.277078086                              | 0.812639692                                             | 845407.4098                                              | 1058.830769                                         |
| 0.400813008                              | 0.049509028                                             | 18028.41988                                              | 561.0121704                                         |
| 0.426822558                              | 0.074971317                                             | 7817.645827                                              | 348.3744763                                         |
| 0.3230532                                | 0.789940382                                             | 92382.21599                                              | 321.9260143                                         |
| 0.534781484                              | 0.03598544                                              | 2460.744197                                              | 325.2736944                                         |
| 0.407336436                              | 0.106936943                                             | 32512.94825                                              | 553.5712366                                         |
| 0.47307074                               | 0.046474919                                             | 18784.87511                                              | 643.5607477                                         |
| 0.39827856                               | 0.054708524                                             | 27657.89391                                              | 741.1237721                                         |
| 0.42295082                               | 0.156845681                                             | 27950.33247                                              | 443.764419                                          |
| 0.410127137                              | 0.252026299                                             | 74620.64351                                              | 573.1143773                                         |
| 0.35706085                               | 0.175143624                                             | 26321.40193                                              | 373.3022508                                         |
| 0.522914219                              | 0.031016779                                             | 3646.321348                                              | 400.9483146                                         |
| 0.360207101                              | 0.27674611                                              | 72858.25462                                              | 543.7659138                                         |
| 0.449202024                              | 0.050864575                                             | 21350.94021                                              | 695.4419411                                         |
| 0.514387422                              | 0.019740081                                             | 5814.00519                                               | 572.0219146                                         |
| 0.435283688                              | 0.080945954                                             | 14110.67413                                              | 417.1461303                                         |
| 0.377717391                              | 0.127918946                                             | 13993.40288                                              | 369.6043165                                         |
| 0.402255639                              | 0.077134657                                             | 19284.2785                                               | 522.8579439                                         |
| 0.368205128                              | 0.19343734                                              | 32082.51393                                              | 409.8036212                                         |
| 0.443016069                              | 0.068041796                                             | 14323.50167                                              | 471.1668527                                         |
| 0.351359167                              | 0.341500263                                             | 159958.3235                                              | 673.4740741                                         |
| 0.420509709                              | 0.035074465                                             | 14406.38384                                              | 628.6868687                                         |
| 0.444188849                              | 0.135401748                                             | 56546.64636                                              | 699.329963                                          |
| 0.347112118                              | 0.307146178                                             | 93083.4323                                               | 556.4486134                                         |
| 0.428089888                              | 0.067106454                                             | 67073.11986                                              | 988.0918635                                         |
| 0.405769563                              | 0.127971324                                             | 74697.28097                                              | 787.1260111                                         |
| 0.388692116                              | 0.073138748                                             | 36461.79177                                              | 688.483969                                          |
| 0.359493671                              | 0.39053768                                              | 17016.98592                                              | 217.8450704                                         |
| 0.338166753                              | 0.585512475                                             | 235059.268                                               | 631.9257274                                         |
| 0.358128834                              | 0.162677837                                             | 46837.41756                                              | 514.8329764                                         |
| 0.40016                                  | 0.141960861                                             | 58195.23347                                              | 625.2047809                                         |
| 0.459279495                              | 0.035636723                                             | 23954.39033                                              | 809.8237918                                         |
| 0.293650794                              | 1.33589293                                              | 229574.9365                                              | 410.7649824                                         |
| 0.385681293                              | 0.188209351                                             | 22342.32136                                              | 328.4071856                                         |
| 0.338927739                              | 0.8814075                                               | 435876.368                                               | 729.4786795                                         |
| 0.37340939                               | 0.446377115                                             | 59241.99295                                              | 400.8495887                                         |
| 0.502434706                              | 0.038048731                                             | 11317.58238                                              | 536.6                                               |
| 0.480038326                              | 0.066509006                                             | 8797.760479                                              | 389.4271457                                         |
| 0.399403875                              | 0.09570345                                              | 13458.35821                                              | 366.2761194                                         |
| 0.363105175                              | 0.232610926                                             | 41426.86437                                              | 446.3183908                                         |
| 0.362212944                              | 0.172503215                                             | 37203.68012                                              | 442.6282421                                         |
| 0.384885764                              | 0.081140178                                             | 20474.29985                                              | 498.9238965                                         |
| 0.472424113                              | 0.040595805                                             | 16620.12579                                              | 652.6696833                                         |
| 0.516339869                              | 0.021402999                                             | 19301.01071                                              | 991.8149951                                         |
| 0.422456921                              | 0.145356992                                             | 35549.03421                                              | 478.575                                             |
| 0.340776996                              | 0.649819852                                             | 230654.5485                                              | 598.7037702                                         |
| 0.326391149                              | 0.218825313                                             | 26052.5005                                               | 331.0957129                                         |
| 0.427224272                              | 0.085794211                                             | 17445.28503                                              | 462.4193858                                         |
| 0.183420366                              | 3.334096781                                             | 360530.2989                                              | 292.4768683                                         |
| 0.424737945                              | 0.167071618                                             | 26213.31392                                              | 403.4274432                                         |
| 0.386943837                              | 0.369841285                                             | 69797.66352                                              | 459.2836946                                         |
| 0.364754098                              | 0.183917695                                             | 68030.28277                                              | 600.7940075                                         |
| 0.338765432                              | 0.276887274                                             | 112500.6851                                              | 626.8833819                                         |
| 0.254601227                              | 0.996907965                                             | 284335.3855                                              | 576.9909639                                         |
| 0.500419815                              | 0.029149195                                             | 5914.168624                                              | 500.2944631                                         |
| 0.440285549                              | 0.086223096                                             | 18616.07011                                              | 454.130149                                          |
| 0.361212121                              | 0.523385974                                             | 77195.8255                                               | 392.3498322                                         |
| 0.463924632                              | 0.049342731                                             | 12631.24468                                              | 498.6760773                                         |
| 0.376680304                              | 0.260299903                                             | 244400.5531                                              | 1014.327386                                         |
| 0.400070998                              | 0.159501099                                             | 19377.00621                                              | 333.2768412                                         |
| 0.390639924                              | 0.130616164                                             | 61199.75306                                              | 657.9755501                                         |
| 0.321342926                              | 0.493232958                                             | 34064.23881                                              | 239.3880597                                         |
| 0.295808798                              | 1.948159837                                             | 556341.4496                                              | 565.3495316                                         |

| log.sigma.1.5.mm.3D_glszm_SmallAreaEmphasis | log.sigma.1.5.mm.3D_glszm_LowGrayLevelZoneEmphasis | log.sigma.1.5.mm.3D_glszm_ZoneEntropy | log.sigma.1.5.mm.3D_glszm_SmallAreaLowGrayLevelEmphasis |
|---------------------------------------------|----------------------------------------------------|---------------------------------------|---------------------------------------------------------|
| 0.743996471                                 | 0.002361126                                        | 6.198190984                           | 0.002061986                                             |
| 0.684606638                                 | 0.009683171                                        | 5.697284838                           | 0.008731393                                             |
| 0.702788487                                 | 0.008298911                                        | 5.83588344                            | 0.007274118                                             |
| 0.720039273                                 | 0.005522221                                        | 6.047559719                           | 0.005024288                                             |
| 0.721921159                                 | 0.011903985                                        | 6.026125743                           | 0.009825052                                             |
| 0.735730332                                 | 0.006059593                                        | 5.987887719                           | 0.005554573                                             |
| 0.700095894                                 | 0.003738896                                        | 6.165578375                           | 0.003008168                                             |
| 0.73934595                                  | 0.002798245                                        | 6.056930225                           | 0.002370097                                             |
| 0.720305252                                 | 0.004591342                                        | 6.162029349                           | 0.00395428                                              |
| 0.689347952                                 | 0.005509198                                        | 6.100989925                           | 0.004870501                                             |
| 0.679201758                                 | 0.008062337                                        | 5.912772163                           | 0.006741082                                             |
| 0.728000663                                 | 0.004760445                                        | 6.206043328                           | 0.004310306                                             |
| 0.726749692                                 | 0.007583763                                        | 5.93079128                            | 0.007009998                                             |
| 0.715749999                                 | 0.005040914                                        | 6.231866872                           | 0.004455124                                             |
| 0.71523173                                  | 0.003655616                                        | 6.269886619                           | 0.003192097                                             |
| 0.70946074                                  | 0.003710155                                        | 6.11763968                            | 0.00316458                                              |
| 0.676822504                                 | 0.010625849                                        | 6.036212675                           | 0.008980004                                             |
| 0.706774202                                 | 0.006528049                                        | 5.775946683                           | 0.005622125                                             |
| 0.698485286                                 | 0.004620351                                        | 5.802523356                           | 0.003957382                                             |
| 0.724234071                                 | 0.003555555                                        | 6.246942393                           | 0.003092317                                             |
| 0.714087497                                 | 0.004820376                                        | 5.831283597                           | 0.003919617                                             |
| 0.671865189                                 | 0.007773375                                        | 5.919912453                           | 0.006734893                                             |
| 0.705509142                                 | 0.004411497                                        | 5.828067386                           | 0.003931216                                             |
| 0.70147755                                  | 0.003760443                                        | 6.092374229                           | 0.003122471                                             |
| 0.728787536                                 | 0.00722134                                         | 5.974597311                           | 0.006726337                                             |
| 0.718665278                                 | 0.00269722                                         | 6.298089118                           | 0.002273902                                             |
| 0.730256992                                 | 0.003327359                                        | 6.202004632                           | 0.002831113                                             |
| 0.712539457                                 | 0.003591587                                        | 6.117819793                           | 0.003109807                                             |
| 0.681867691                                 | 0.008896835                                        | 5.699213983                           | 0.007687804                                             |
| 0.720746346                                 | 0.003809377                                        | 5.894718385                           | 0.003283524                                             |
| 0.728686698                                 | 0.003056459                                        | 6.151670861                           | 0.002617526                                             |
| 0.723997699                                 | 0.004686515                                        | 5.896666974                           | 0.004084998                                             |
| 0.709598269                                 | 0.00343491                                         | 6.31507761                            | 0.002867505                                             |
| 0.70180207                                  | 0.005513191                                        | 6.263723249                           | 0.004823096                                             |
| 0.718728063                                 | 0.004456671                                        | 6.245564698                           | 0.003764018                                             |
| 0.721745084                                 | 0.00472409                                         | 5.957878563                           | 0.004001047                                             |
| 0.73227356                                  | 0.002241015                                        | 6.176306806                           | 0.001944532                                             |
| 0.74088925                                  | 0.001999824                                        | 6.13813757                            | 0.001737102                                             |
| 0.671354095                                 | 0.004767095                                        | 5.920431536                           | 0.004173968                                             |
| 0.678689524                                 | 0.00546076                                         | 6.309080624                           | 0.004220338                                             |
| 0.682133906                                 | 0.007561932                                        | 6.039248853                           | 0.006256674                                             |
| 0.71190366                                  | 0.008690218                                        | 6.195086131                           | 0.00729255                                              |
| 0.695587212                                 | 0.003639691                                        | 6.184661742                           | 0.002972912                                             |
| 0.723390076                                 | 0.003847732                                        | 6.187923181                           | 0.00327737                                              |
| 0.712180963                                 | 0.004469629                                        | 6.0509472                             | 0.004068582                                             |
| 0.737194422                                 | 0.004458627                                        | 5.988639802                           | 0.003722512                                             |
| 0.730599704                                 | 0.0033587                                          | 6.140975575                           | 0.002751996                                             |
| 0.710002394                                 | 0.008038104                                        | 5.681345742                           | 0.007089225                                             |
| 0.722935185                                 | 0.010044592                                        | 5.961082189                           | 0.009119119                                             |
| 0.73497531                                  | 0.004706971                                        | 5.790593122                           | 0.004163446                                             |
| 0.721485537                                 | 0.004000639                                        | 6.224714501                           | 0.003533978                                             |
| 0.707552582                                 | 0.003313746                                        | 6.240377292                           | 0.002685681                                             |
| 0.709351396                                 | 0.004694364                                        | 6.135556172                           | 0.003906807                                             |
| 0.72563786                                  | 0.007787957                                        | 5.832924218                           | 0.0069806                                               |
| 0.689316699                                 | 0.005270642                                        | 6.070321352                           | 0.004605804                                             |
| 0.701321701                                 | 0.007740273                                        | 6.007717424                           | 0.006955205                                             |
| 0.704490243                                 | 0.004629298                                        | 6.187351408                           | 0.003900801                                             |
| 0.709078292                                 | 0.002866446                                        | 6.086955221                           | 0.002366557                                             |
| 0.707998783                                 | 0.003779228                                        | 6.111308946                           | 0.003283262                                             |
| 0.720466661                                 | 0.002267259                                        | 6.276396878                           | 0.001803276                                             |
| 0.734780505                                 | 0.004612659                                        | 5.983910869                           | 0.004080649                                             |
| 0.733337692                                 | 0.002306169                                        | 6.114027474                           | 0.002031515                                             |
| 0.725659333                                 | 0.002240555                                        | 6.193212024                           | 0.001853656                                             |
| 0.710238986                                 | 0.002499327                                        | 6.346875945                           | 0.002023434                                             |
| 0.688715                                    | 0.012417819                                        | 5.596731509                           | 0.010732346                                             |
| 0.736364122                                 | 0.003243916                                        | 6.05362226                            | 0.002743742                                             |
| 0.716402726                                 | 0.005588645                                        | 5.894294121                           | 0.004974286                                             |
| 0.72312769                                  | 0.003235427                                        | 6.2297188                             | 0.002744375                                             |
| 0.723809639                                 | 0.0020799                                          | 6.179175278                           | 0.00170874                                              |
| 0.694221126                                 | 0.006229868                                        | 5.879658279                           | 0.005369768                                             |
| 0.700314113                                 | 0.011014501                                        | 5.943753476                           | 0.009837039                                             |
| 0.736315539                                 | 0.003019465                                        | 6.086965709                           | 0.002604156                                             |
| 0.733342214                                 | 0.008311265                                        | 6.093827353                           | 0.00715879                                              |
| 0.729582537                                 | 0.004706422                                        | 6.203408855                           | 0.004059463                                             |
| 0.718388772                                 | 0.005874125                                        | 6.18456429                            | 0.004816143                                             |
| 0.692129878                                 | 0.007392918                                        | 6.00077696                            | 0.006288328                                             |
| 0.731637844                                 | 0.004628934                                        | 5.927390015                           | 0.00394393                                              |
| 0.735843828                                 | 0.01132829                                         | 5.796130225                           | 0.010718642                                             |
| 0.70251415                                  | 0.005144509                                        | 5.913481411                           | 0.004463891                                             |
| 0.720333377                                 | 0.003374066                                        | 6.190593505                           | 0.002821751                                             |
| 0.753251472                                 | 0.002397445                                        | 6.138711937                           | 0.002114424                                             |
| 0.748012502                                 | 0.005906917                                        | 6.060238604                           | 0.005232879                                             |
| 0.716966693                                 | 0.004386921                                        | 6.077159379                           | 0.003842707                                             |
| 0.642630639                                 | 0.00517786                                         | 6.072737211                           | 0.003913498                                             |
| 0.70470849                                  | 0.006150128                                        | 6.231453844                           | 0.005234568                                             |
| 0.666885512                                 | 0.009229826                                        | 5.467793911                           | 0.007722619                                             |
| 0.710992195                                 | 0.007235268                                        | 6.18775771                            | 0.006282043                                             |
| 0.729426682                                 | 0.005546743                                        | 6.038653386                           | 0.004779017                                             |
| 0.721073405                                 | 0.004561729                                        | 5.958669313                           | 0.00405136                                              |
| 0.722927404                                 | 0.003792348                                        | 5.857322744                           | 0.003296803                                             |
| 0.729765256                                 | 0.005083076                                        | 5.407752486                           | 0.004583084                                             |
| 0.709086522                                 | 0.004125335                                        | 6.091582538                           | 0.003440926                                             |
| 0.706660917                                 | 0.004366284                                        | 6.25013061                            | 0.003589916                                             |
| 0.720183989                                 | 0.007686939                                        | 5.984286083                           | 0.006737718                                             |
| 0.705837606                                 | 0.003579597                                        | 6.153402953                           | 0.002886608                                             |
| 0.742963648                                 | 0.002331767                                        | 6.193558898                           | 0.002043121                                             |
| 0.716449564                                 | 0.007393527                                        | 6.062861489                           | 0.006233156                                             |
| 0.715436134                                 | 0.007265376                                        | 5.966212294                           | 0.006796448                                             |
| 0.663060502                                 | 0.011471188                                        | 5.629938588                           | 0.009485171                                             |
| 0.724171549                                 | 0.003133598                                        | 5.923209193                           | 0.002628751                                             |

| log.sigma.1.5.mm.3D_ngtdm_Coarseness | log.sigma.1.5.mm.3D_ngtdm_Complexity | log.sigma.1.5.mm.3D_ngtdm_Strength | log.sigma.1.5.mm.3D_ngtdm_Busyness | log.sigma.1.5.mm.3D_ngtdm_Contrast |
|--------------------------------------|--------------------------------------|------------------------------------|------------------------------------|------------------------------------|
| 0.003162684                          | 1.707892215                          | 2.27591835                         | 0.170093559                        | 7.06E-05                           |
| 0.006850667                          | 0.967990731                          | 2.678352763                        | 0.184764664                        | 7.43E-05                           |
| 0.004881092                          | 0.615930153                          | 1.855186561                        | 0.257325689                        | 3.64E-05                           |
| 0.006940356                          | 1.766520668                          | 3.540928871                        | 0.124479493                        | 0.000134007                        |
| 0.002627811                          | 0.53073381                           | 0.979497316                        | 0.465980264                        | 5.01E-05                           |
| 0.009385808                          | 2.977769171                          | 4.890818542                        | 0.097625054                        | 0.000229414                        |
| 0.001229165                          | 0.344989344                          | 0.775317393                        | 0.658213154                        | 1.04E-05                           |
| 0.001333225                          | 0.357707157                          | 0.9306365                          | 0.494129275                        | 1.19E-05                           |
| 0.001470817                          | 0.429433914                          | 0.806050893                        | 0.575128966                        | 1.99E-05                           |
| 0.00589211                           | 1.461534636                          | 2.682210671                        | 0.160117137                        | 0.000118671                        |
| 0.00438667                           | 0.59368348                           | 1.351157189                        | 0.341158175                        | 5.17E-05                           |
| 0.002672129                          | 1.144266094                          | 1.987109412                        | 0.234888394                        | 4.74E-05                           |
| 0.003671207                          | 0.654820976                          | 2.576518775                        | 0.195411145                        | 2.37E-05                           |
| 0.003963008                          | 1.412374964                          | 2.776062026                        | 0.167965563                        | 5.52E-05                           |
| 0.003385919                          | 1.475754925                          | 2.353130945                        | 0.185231749                        | 6.06E-05                           |
| 0.001539395                          | 0.432846085                          | 1.226412406                        | 0.432391767                        | 1.13E-05                           |
| 0.005551878                          | 0.94649401                           | 1.499883221                        | 0.314786833                        | 0.000119484                        |
| 0.005269793                          | 0.76498033                           | 2.655585347                        | 0.186012164                        | 4.02E-05                           |
| 0.004924351                          | 0.8222941                            | 1.915126823                        | 0.212924046                        | 5.06E-05                           |
| 0.001265604                          | 0.510966211                          | 1.039840028                        | 0.487527597                        | 1.46E-05                           |
| 0.002254183                          | 0.23498338                           | 0.816557418                        | 0.551815754                        | 1.54E-05                           |
| 0.005477161                          | 0.914313904                          | 1.626470167                        | 0.282980754                        | 0.000112236                        |
| 0.006346024                          | 1.269820475                          | 2.742632124                        | 0.140522994                        | 9.86E-05                           |
| 0.002603778                          | 0.489972869                          | 1.119111166                        | 0.386790455                        | 3.05E-05                           |
| 0.005444554                          | 1.518824712                          | 3.659928939                        | 0.133025891                        | 6.43E-05                           |
| 0.002871511                          | 1.156187581                          | 1.925188214                        | 0.228818456                        | 4.94E-05                           |
| 0.002214685                          | 0.737128374                          | 1.292407952                        | 0.334796186                        | 3.22E-05                           |
| 0.002459975                          | 0.64226942                           | 1.597109857                        | 0.292416403                        | 2.53E-05                           |
| 0.012978012                          | 1.798677024                          | 2.658682504                        | 0.163323046                        | 0.000388403                        |
| 0.002973236                          | 0.646443275                          | 1.714745118                        | 0.278271623                        | 3.12E-05                           |
| 0.00143979                           | 0.566500882                          | 1.522286759                        | 0.359373043                        | 9.97E-06                           |
| 0.003385067                          | 0.585683332                          | 1.520761602                        | 0.269849726                        | 3.47E-05                           |
| 0.002247635                          | 0.726185164                          | 1.472502604                        | 0.316667491                        | 2.67E-05                           |
| 0.003086395                          | 0.973945207                          | 2.020051443                        | 0.22949668                         | 3.56E-05                           |
| 0.001587098                          | 0.582839125                          | 1.085410604                        | 0.474946967                        | 1.93E-05                           |
| 0.002320678                          | 0.498683178                          | 1.430926919                        | 0.369644854                        | 1.87E-05                           |
| 0.001874978                          | 0.792409611                          | 2.235614431                        | 0.22288937                         | 1.37E-05                           |
| 0.001435303                          | 0.454283588                          | 1.874928055                        | 0.288151433                        | 6.70E-06                           |
| 0.00487574                           | 1.045296764                          | 2.317457748                        | 0.200376646                        | 7.42E-05                           |
| 0.000946574                          | 0.218772939                          | 0.378018307                        | 1.300550296                        | 1.35E-05                           |
| 0.002710563                          | 0.379459081                          | 0.94509498                         | 0.475860215                        | 2.85E-05                           |
| 0.001686702                          | 0.525406853                          | 0.661550279                        | 0.84575726                         | 4.17E-05                           |
| 0.001787333                          | 0.555557961                          | 1.117127867                        | 0.43485137                         | 2.17E-05                           |
| 0.002562418                          | 1.130907728                          | 1.648029483                        | 0.268426803                        | 5.05E-05                           |
| 0.005088906                          | 1.561458501                          | 3.831101862                        | 0.130863305                        | 6.41E-05                           |
| 0.002536556                          | 0.68486949                           | 1.311528251                        | 0.369102523                        | 3.12E-05                           |
| 0.001523629                          | 0.490725245                          | 1.030784185                        | 0.463720404                        | 1.56E-05                           |
| 0.00662664                           | 1.220579426                          | 2.947683337                        | 0.173848443                        | 8.38E-05                           |
| 0.007505547                          | 1.827024996                          | 2.584740342                        | 0.168805815                        | 0.000220745                        |
| 0.004762925                          | 0.805214265                          | 2.073269914                        | 0.221801716                        | 6.21E-05                           |
| 0.002591888                          | 0.936047252                          | 1.694157741                        | 0.266472577                        | 4.11E-05                           |
| 0.001876947                          | 0.799442959                          | 1.078682119                        | 0.432107561                        | 3.69E-05                           |
| 0.001398577                          | 0.413398774                          | 0.690565954                        | 0.698833252                        | 2.02E-05                           |
| 0.006029092                          | 1.09269565                           | 2.421617109                        | 0.196238958                        | 6.66E-05                           |
| 0.004872703                          | 1.150971084                          | 2.427504447                        | 0.192118638                        | 7.05E-05                           |
| 0.00333075                           | 0.591558576                          | 1.43955936                         | 0.333129081                        | 4.21E-05                           |
| 0.001669431                          | 0.4417263                            | 0.777216831                        | 0.586842934                        | 2.66E-05                           |
| 0.002049096                          | 0.496063893                          | 1.263027264                        | 0.340154773                        | 1.84E-05                           |
| 0.003927064                          | 1.171810589                          | 2.226669321                        | 0.189666687                        | 5.44E-05                           |
| 0.000800551                          | 0.309353949                          | 0.545769138                        | 0.784414535                        | 9.00E-06                           |
| 0.003868863                          | 0.85743729                           | 2.272456869                        | 0.206265569                        | 4.02E-05                           |
| 0.002487633                          | 1.077060296                          | 2.170197824                        | 0.19947841                         | 3.09E-05                           |
| 0.001177224                          | 0.446177799                          | 0.913202425                        | 0.498654485                        | 1.32E-05                           |
| 0.000848543                          | 0.373005333                          | 0.792268291                        | 0.657158554                        | 8.03E-06                           |
| 0.0078827                            | 0.703814129                          | 1.625621278                        | 0.287649742                        | 0.000111043                        |
| 0.001802165                          | 0.457614534                          | 1.184972715                        | 0.381601719                        | 1.63E-05                           |
| 0.005419915                          | 1.131140818                          | 2.733852615                        | 0.152347299                        | 5.44E-05                           |
| 0.001087371                          | 0.399967199                          | 0.79304988                         | 0.588554342                        | 1.16E-05                           |
| 0.001157475                          | 0.524029397                          | 1.136394753                        | 0.436679187                        | 1.06E-05                           |
| 0.002312709                          | 0.322771719                          | 1.002485787                        | 0.472304165                        | 1.84E-05                           |
| 0.005028235                          | 0.864459397                          | 1.709262564                        | 0.263482196                        | 7.78E-05                           |
| 0.001607653                          | 0.545827003                          | 1.58965081                         | 0.337392694                        | 1.14E-05                           |
| 0.003221726                          | 0.726493854                          | 1.464947496                        | 0.31425249                         | 4.06E-05                           |
| 0.002929779                          | 1.245057435                          | 1.638357516                        | 0.280983053                        | 6.47E-05                           |
| 0.002081633                          | 0.623006165                          | 0.838694668                        | 0.570166188                        | 4.54E-05                           |
| 0.004843024                          | 0.910902394                          | 1.824772565                        | 0.24732465                         | 7.17E-05                           |
| 0.002687736                          | 0.584243677                          | 1.549679547                        | 0.348381975                        | 2.33E-05                           |
| 0.006603189                          | 1.384652285                          | 3.26465919                         | 0.146185117                        | 8.40E-05                           |
| 0.003590677                          | 0.811023661                          | 1.884141163                        | 0.261024298                        | 4.11E-05                           |
| 0.003008482                          | 1.21377517                           | 1.898406165                        | 0.22974891                         | 4.63E-05                           |
| 0.003341388                          | 1.707888067                          | 2.36196579                         | 0.164384416                        | 7.43E-05                           |
| 0.003828896                          | 1.25099473                           | 2.128928658                        | 0.212601787                        | 5.82E-05                           |
| 0.002181926                          | 0.538179103                          | 1.345036527                        | 0.330048892                        | 1.90E-05                           |
| 0.002175193                          | 0.220835426                          | 0.572645427                        | 0.743159062                        | 2.36E-05                           |
| 0.002707471                          | 0.808743762                          | 1.237974463                        | 0.355548015                        | 5.04E-05                           |
| 0.004404736                          | 0.281373507                          | 1.746780253                        | 0.325166774                        | 1.75E-05                           |
| 0.002976536                          | 0.846498832                          | 1.365730216                        | 0.332709261                        | 4.76E-05                           |
| 0.002480307                          | 0.477998936                          | 1.045847328                        | 0.442079552                        | 3.70E-05                           |
| 0.004466218                          | 0.98227703                           | 2.491402224                        | 0.182294589                        | 5.27E-05                           |
| 0.003294759                          | 0.644965883                          | 1.871301352                        | 0.242861888                        | 3.29E-05                           |
| 0.004918962                          | 0.402987654                          | 1.756750689                        | 0.234741663                        | 3.55E-05                           |
| 0.0027363                            | 0.845152452                          | 1.31301294                         | 0.357711677                        | 4.81E-05                           |
| 0.00127958                           | 0.436418087                          | 0.731460528                        | 0.670314725                        | 1.83E-05                           |
| 0.002047309                          | 0.322827543                          | 0.798945126                        | 0.59545545                         | 2.64E-05                           |
| 0.001479866                          | 0.5379053                            | 0.881009883                        | 0.561691904                        | 2.03E-05                           |
| 0.002026126                          | 0.947138377                          | 2.280007144                        | 0.209978371                        | 1.95E-05                           |
| 0.00237768                           | 0.448160232                          | 0.897737769                        | 0.525326308                        | 3.15E-05                           |
| 0.006568906                          | 1.725048753                          | 3.362078241                        | 0.114401419                        | 0.000104089                        |
| 0.007899316                          | 0.596339358                          | 1.539829979                        | 0.264801183                        | 0.000110668                        |
| 0.001122843                          | 0.209804223                          | 0.701371059                        | 0.726113645                        | 8.17E-06                           |

| log.sigma.1.0.mm.3D_gldm_GrayLevelVariance | log.sigma.1.0.mm.3D_gldm_HighGrayLevelEmphasis | log.sigma.1.0.mm.3D_gldm_GrayLevelNonUniformityNormalized | log.sigma.1.0.mm.3D_gldm_DependenceEntropy |
|--------------------------------------------|------------------------------------------------|-----------------------------------------------------------|--------------------------------------------|
| 13.43527681                                | 487.1437323                                    | 0.09411968                                                | 6.162415142                                |
| 5.103411593                                | 150.0032086                                    | 0.173503389                                               | 5.674248196                                |
| 4.612799151                                | 124.4967405                                    | 0.18652737                                                | 5.938758014                                |
| 9.169479398                                | 254.0583419                                    | 0.122972691                                               | 6.057282874                                |
| 7.60935146                                 | 197.8116554                                    | 0.131484261                                               | 5.996226212                                |
| 11.76440771                                | 270.0969697                                    | 0.106818182                                               | 5.783405858                                |
| 6.521651275                                | 230.1911166                                    | 0.137093326                                               | 6.064894751                                |
| 7.440470182                                | 296.57361                                      | 0.158862309                                               | 5.997447378                                |
| 8.031896076                                | 294.9564452                                    | 0.12270085                                                | 6.035674167                                |
| 9.358623162                                | 268.0522388                                    | 0.11223442                                                | 5.886631286                                |
| 5.077405033                                | 145.5344828                                    | 0.143287084                                               | 5.774734178                                |
| 11.38735278                                | 340.7193059                                    | 0.110365564                                               | 6.038250801                                |
| 5.885056871                                | 287.4847349                                    | 0.214386596                                               | 5.747992789                                |
| 9.556571732                                | 329.6476412                                    | 0.123987098                                               | 6.065104313                                |
| 11.64039737                                | 370.6512097                                    | 0.113065817                                               | 6.075781085                                |
| 6.278341185                                | 255.3496344                                    | 0.162901496                                               | 5.955725237                                |
| 7.916076755                                | 125.8040201                                    | 0.109117615                                               | 5.906929043                                |
| 4.799625598                                | 227.8815896                                    | 0.18696511                                                | 5.746082523                                |
| 5.534033039                                | 225.1810478                                    | 0.141916805                                               | 5.738553015                                |
| 9.433273173                                | 299.1661858                                    | 0.117590526                                               | 6.013464011                                |
| 3.602675838                                | 169.3257275                                    | 0.202802186                                               | 5.835648491                                |
| 7.246789969                                | 150.291937                                     | 0.118498661                                               | 5.81377737                                 |
| 7.023921967                                | 291.8554688                                    | 0.132390976                                               | 5.861121874                                |
| 6.571116213                                | 231.2765395                                    | 0.132881541                                               | 5.958525181                                |
| 8.275269372                                | 271.0054988                                    | 0.134083994                                               | 5.898409683                                |
| 11.86221956                                | 384.4385817                                    | 0.103310828                                               | 6.130252244                                |
| 9.981796906                                | 266.9328797                                    | 0.110390461                                               | 6.14817606                                 |
| 7.03367217                                 | 289.9967415                                    | 0.144823641                                               | 5.960564987                                |
| 7.303644981                                | 150.7136465                                    | 0.115305116                                               | 5.662811764                                |
| 6.082469762                                | 260.1387537                                    | 0.152577107                                               | 5.781930155                                |
| 7.405505093                                | 330.4150904                                    | 0.156920465                                               | 6.038191238                                |
| 5.933445479                                | 250.3441276                                    | 0.167183592                                               | 5.892424779                                |
| 8.929021514                                | 260.0371632                                    | 0.123861728                                               | 6.189798147                                |
| 9.38466727                                 | 232.1561702                                    | 0.127907288                                               | 6.048029387                                |
| 9.590956605                                | 213.1196639                                    | 0.114071119                                               | 6.085952567                                |
| 6.241156744                                | 228.5781927                                    | 0.163672319                                               | 5.885058548                                |
| 8.205447542                                | 480.5229777                                    | 0.150907337                                               | 6.010321598                                |
| 6.254647849                                | 437.341988                                     | 0.203896347                                               | 6.037146936                                |
| 6.699375372                                | 286.2414634                                    | 0.139056117                                               | 5.733428512                                |
| 7.509077912                                | 145.9969739                                    | 0.113188529                                               | 6.098447731                                |
| 5.345977224                                | 141.3191981                                    | 0.165941033                                               | 5.918794364                                |
| 10.29858947                                | 172.9451771                                    | 0.090634157                                               | 6.038123224                                |
| 7.379627228                                | 261.1245552                                    | 0.12790248                                                | 6.007256548                                |
| 11.51755759                                | 294.6712219                                    | 0.103493231                                               | 6.046994375                                |
| 8.660274637                                | 341.5086072                                    | 0.128330407                                               | 5.899480711                                |
| 8.017171011                                | 178.4979964                                    | 0.124289568                                               | 5.982129928                                |
| 8.429343455                                | 232.1488382                                    | 0.129902088                                               | 6.003602556                                |
| 5.78663953                                 | 148.6865672                                    | 0.160860012                                               | 5.551587062                                |
| 11.15577029                                | 181.226792                                     | 0.105742743                                               | 5.79648657                                 |
| 6.271086447                                | 301.5414201                                    | 0.143591786                                               | 5.896964519                                |
| 10.22944225                                | 305.6839237                                    | 0.111986934                                               | 5.986886572                                |
| 10.37665973                                | 233.6446158                                    | 0.095766929                                               | 6.035057257                                |
| 7.999191282                                | 200.9578901                                    | 0.114942109                                               | 5.945918774                                |
| 5.773943729                                | 151.321558                                     | 0.144351567                                               | 5.76508001                                 |
| 8.546263214                                | 237.2834586                                    | 0.132229069                                               | 5.832117683                                |
| 6.223064037                                | 171.3389744                                    | 0.142453649                                               | 5.812361223                                |
| 8.384387018                                | 233.5698393                                    | 0.114060026                                               | 6.051109142                                |
| 6.580030263                                | 284.142568                                     | 0.147723772                                               | 5.962693704                                |
| 8.122160062                                | 290.3743932                                    | 0.129846268                                               | 5.858281669                                |
| 9.377726234                                | 288.0617811                                    | 0.109658484                                               | 6.264848755                                |
| 7.296165843                                | 295.1613817                                    | 0.164414273                                               | 5.89271149                                 |
| 9.916326642                                | 410.4108614                                    | 0.120760286                                               | 6.071754975                                |
| 9.233299996                                | 375.1798238                                    | 0.123033507                                               | 6.103693147                                |
| 8.561855266                                | 291.8280205                                    | 0.128077757                                               | 6.070629799                                |
| 3.810094536                                | 102.8                                          | 0.164204454                                               | 5.506402184                                |
| 7.022604023                                | 288.6747799                                    | 0.154570647                                               | 5.970149572                                |
| 6.897817358                                | 220.2952454                                    | 0.157860194                                               | 5.882743836                                |
| 8.57859031                                 | 324.58752                                      | 0.124935885                                               | 6.091299194                                |
| 8.907480718                                | 408.0201468                                    | 0.118435746                                               | 6.071540326                                |
| 4.598411793                                | 196.4658385                                    | 0.172043879                                               | 5.74742386                                 |
| 6.881471565                                | 170.2055427                                    | 0.141364738                                               | 5.856160499                                |
| 7.582061823                                | 266.3944056                                    | 0.160687456                                               | 5.995600712                                |
| 8.199809736                                | 232.0035103                                    | 0.132648843                                               | 6.156082199                                |
| 11.83570082                                | 227.5055334                                    | 0.093485289                                               | 6.139116756                                |
| 9.486848375                                | 173.483871                                     | 0.099477199                                               | 6.076030304                                |
| 6.57272143                                 | 169.4679583                                    | 0.135650685                                               | 5.833984093                                |
| 6.014907288                                | 202.3188648                                    | 0.153081025                                               | 5.848463633                                |
| 6.80350613                                 | 197.7797495                                    | 0.147900768                                               | 5.683264314                                |
| 5.95688246                                 | 197.71529                                      | 0.140402952                                               | 5.829146142                                |
| 10.13530592                                | 226.1209919                                    | 0.106058742                                               | 6.090008325                                |
| 12.95055384                                | 488.8878834                                    | 0.097446211                                               | 6.141069125                                |
| 9.055317929                                | 195.7065036                                    | 0.129279097                                               | 6.045637456                                |
| 6.795289809                                | 289.8149281                                    | 0.158979376                                               | 6.010720992                                |
| 4.041160697                                | 143.6700293                                    | 0.156866609                                               | 5.765667375                                |
| 8.983477625                                | 228.6404264                                    | 0.117859452                                               | 6.127794164                                |
| 1.978086291                                | 116.9099217                                    | 0.287391181                                               | 5.578459755                                |
| 9.126262411                                | 223.0582809                                    | 0.116570811                                               | 6.165269218                                |
| 7.604803258                                | 210.6309263                                    | 0.132640754                                               | 6.067706241                                |
| 6.920539207                                | 262.4398907                                    | 0.146771141                                               | 5.791118647                                |
| 5.999530316                                | 258.8330864                                    | 0.161901905                                               | 5.888452366                                |
| 3.567531122                                | 258.7093558                                    | 0.217567936                                               | 5.648074451                                |
| 9.010639727                                | 237.995382                                     | 0.102157872                                               | 5.929036644                                |
| 8.950627969                                | 199.2128111                                    | 0.111649123                                               | 6.038360807                                |
| 5.996269605                                | 202.2678788                                    | 0.14878641                                                | 5.949052323                                |
| 8.383494869                                | 226.5836397                                    | 0.105686491                                               | 6.030039592                                |
| 10.20197191                                | 538.4763296                                    | 0.144732694                                               | 6.15826152                                 |
| 6.796961851                                | 170.1955982                                    | 0.131508594                                               | 5.950724825                                |
| 9.290274026                                | 284.9073543                                    | 0.134623051                                               | 5.981564495                                |
| 3.993905595                                | 117.1330935                                    | 0.179065381                                               | 5.688559844                                |
| 5.080498212                                | 293.2802217                                    | 0.18760382                                                | 5.812939034                                |

| log.sigma.1.0.mm.3D_gldm_DependenceNonUniformity | log.sigma.1.0.mm.3D_gldm_GrayLevelNonUniformity | log.sigma.1.0.mm.3D_gldm_SmallDependenceEmphasis |
|--------------------------------------------------|-------------------------------------------------|--------------------------------------------------|
| 377.6390198                                      | 199.7219604                                     | 0.335718933                                      |
| 102.6064171                                      | 162.2256684                                     | 0.21756171                                       |
| 144.0430248                                      | 286.1329857                                     | 0.19330415                                       |
| 134.1668373                                      | 120.1443193                                     | 0.264708978                                      |
| 316.6064189                                      | 311.3547297                                     | 0.260902454                                      |
| 120.8060606                                      | 70.5                                            | 0.347050526                                      |
| 711.4611573                                      | 774.7143868                                     | 0.250108283                                      |
| 564.6401723                                      | 811.4686766                                     | 0.24455519                                       |
| 644.2349318                                      | 557.7980642                                     | 0.268780209                                      |
| 178.1026119                                      | 120.3152985                                     | 0.305379905                                      |
| 205.8103448                                      | 216.0769231                                     | 0.244650011                                      |
| 369.3392625                                      | 254.3926247                                     | 0.310122839                                      |
| 163.1360471                                      | 400.259775                                      | 0.176115357                                      |
| 233.1782178                                      | 212.8858474                                     | 0.265614237                                      |
| 295.5504032                                      | 224.3225806                                     | 0.305073001                                      |
| 466.8240402                                      | 712.856947                                      | 0.221397458                                      |
| 197.961474                                       | 130.2864322                                     | 0.291081009                                      |
| 124.0624493                                      | 230.5279805                                     | 0.187129964                                      |
| 174.6579353                                      | 184.2080123                                     | 0.244160742                                      |
| 788.6522408                                      | 611.3531448                                     | 0.29364739                                       |
| 264.0350529                                      | 613.2738095                                     | 0.182198101                                      |
| 176.3772011                                      | 127.8600556                                     | 0.295191272                                      |
| 138.3652344                                      | 135.5683594                                     | 0.262757691                                      |
| 360.5413676                                      | 351.7374386                                     | 0.250847707                                      |
| 172.6653574                                      | 170.6889238                                     | 0.271245771                                      |
| 399.9598987                                      | 244.7433516                                     | 0.321521638                                      |
| 490.3448809                                      | 356.89236                                       | 0.290762499                                      |
| 344.7856626                                      | 400.0028965                                     | 0.23997257                                       |
| 81.65771812                                      | 51.54138702                                     | 0.335038307                                      |
| 264.4771178                                      | 313.3933788                                     | 0.249112837                                      |
| 527.7440101                                      | 746.6275746                                     | 0.237731392                                      |
| 220.5137748                                      | 345.9028516                                     | 0.216086658                                      |
| 436.2245277                                      | 399.94952                                       | 0.270784125                                      |
| 312.6731915                                      | 300.5821277                                     | 0.267428465                                      |
| 665.4959128                                      | 502.3692098                                     | 0.292942715                                      |
| 325.5535178                                      | 490.8532844                                     | 0.222236868                                      |
| 430.1281913                                      | 561.5262026                                     | 0.239095018                                      |
| 431.0015501                                      | 1052.309049                                     | 0.178693151                                      |
| 173.4910569                                      | 171.0390244                                     | 0.251132362                                      |
| 1113.12132                                       | 822.8806052                                     | 0.278481328                                      |
| 280.0346955                                      | 430.4510409                                     | 0.207888558                                      |
| 762.2795449                                      | 350.482286                                      | 0.330230362                                      |
| 514.482617                                       | 467.227758                                      | 0.254580962                                      |
| 419.1848875                                      | 257.4911576                                     | 0.313797238                                      |
| 180.8888889                                      | 164.0062598                                     | 0.283267452                                      |
| 391.3249545                                      | 341.1748634                                     | 0.284908739                                      |
| 621.9522139                                      | 592.6133275                                     | 0.2730875                                        |
| 113.2663605                                      | 140.10907                                       | 0.237058825                                      |
| 157.1621622                                      | 89.98707403                                     | 0.335206785                                      |
| 172.5650888                                      | 194.1360947                                     | 0.23288443                                       |
| 408.0276372                                      | 287.6944336                                     | 0.295414653                                      |
| 629.0391575                                      | 322.8303174                                     | 0.331682402                                      |
| 716.9117908                                      | 518.6187943                                     | 0.292596973                                      |
| 144.6322464                                      | 159.3641304                                     | 0.225433665                                      |
| 189.2255639                                      | 175.8646617                                     | 0.269607507                                      |
| 260.0964103                                      | 277.7846154                                     | 0.244865772                                      |
| 618.0037083                                      | 461.3728059                                     | 0.282335957                                      |
| 406.9016773                                      | 510.8288028                                     | 0.225324185                                      |
| 243.4393204                                      | 213.9866505                                     | 0.298290332                                      |
| 1360.714536                                      | 1001.072297                                     | 0.282420522                                      |
| 199.7542469                                      | 290.3556059                                     | 0.25053487                                       |
| 381.058427                                       | 322.4299625                                     | 0.28159914                                       |
| 804.5605459                                      | 712.2409743                                     | 0.282730622                                      |
| 1043.867637                                      | 976.3367441                                     | 0.262412943                                      |
| 101.3265823                                      | 129.721519                                      | 0.206301574                                      |
| 447.0683584                                      | 596.9518384                                     | 0.236025159                                      |
| 149.9294479                                      | 205.8496933                                     | 0.237606917                                      |
| 861.5328                                         | 780.84928                                       | 0.275032404                                      |
| 914.8804849                                      | 693.6781629                                     | 0.310031319                                      |
| 317.1180124                                      | 498.5831608                                     | 0.193288914                                      |
| 167.3294842                                      | 183.6327945                                     | 0.24854061                                       |
| 472.4713287                                      | 689.3491841                                     | 0.236179045                                      |
| 275.4019307                                      | 302.3067135                                     | 0.251233816                                      |
| 403.9092519                                      | 211.1832669                                     | 0.319373898                                      |
| 548.2194187                                      | 311.4631108                                     | 0.319098672                                      |
| 183.9642325                                      | 182.0432191                                     | 0.259204984                                      |
| 297.5342237                                      | 366.7821369                                     | 0.237435909                                      |
| 127.1920668                                      | 141.6889353                                     | 0.253004031                                      |
| 234.370826                                       | 239.6678383                                     | 0.252149154                                      |
| 379.0547242                                      | 248.071398                                      | 0.305432184                                      |
| 350.0809452                                      | 193.8205128                                     | 0.333597085                                      |
| 236.3496387                                      | 232.5730962                                     | 0.272291291                                      |
| 357.6534108                                      | 519.7035791                                     | 0.228940178                                      |
| 389.7334852                                      | 482.0510901                                     | 0.200747299                                      |
| 344.2710127                                      | 287.4592046                                     | 0.277581937                                      |
| 103.654047                                       | 440.2832898                                     | 0.117750208                                      |
| 337.9928721                                      | 278.0213836                                     | 0.291080333                                      |
| 352.6535376                                      | 363.7009482                                     | 0.249883407                                      |
| 196.1188525                                      | 214.8729508                                     | 0.260189808                                      |
| 229.9283951                                      | 327.851358                                      | 0.233492139                                      |
| 114.7837423                                      | 283.708589                                      | 0.176734832                                      |
| 436.5759866                                      | 243.3400504                                     | 0.329211393                                      |
| 815.8736253                                      | 578.6774069                                     | 0.283452154                                      |
| 402.4951515                                      | 490.9951515                                     | 0.244089766                                      |
| 728.4692096                                      | 459.9476103                                     | 0.29009567                                       |
| 396.5634132                                      | 495.2752776                                     | 0.250035228                                      |
| 397.770323                                       | 370.4597089                                     | 0.255190699                                      |
| 138.4861509                                      | 140.9503343                                     | 0.269181211                                      |
| 92.76019185                                      | 149.3405276                                     | 0.196275155                                      |
| 564.5538621                                      | 1083.224454                                     | 0.200860962                                      |

| log.sigma.1.0.mm.3D_gldm_DependenceNonUniformityNormalized | log.sigma.1.0.mm.3D_gldm_DependenceVariance | log.sigma.1.0.mm.3D_gldm_LargeDependenceEmphasis |
|------------------------------------------------------------|---------------------------------------------|--------------------------------------------------|
| 0.177963723                                                | 3.99829426                                  | 13.48539114                                      |
| 0.109739484                                                | 8.303022677                                 | 29.30588235                                      |
| 0.093900277                                                | 15.21879722                                 | 44.91916558                                      |
| 0.13732532                                                 | 6.690285994                                 | 21.44626407                                      |
| 0.133702035                                                | 7.285575694                                 | 22.77618243                                      |
| 0.183039486                                                | 3.475528007                                 | 12.38484848                                      |
| 0.125900046                                                | 9.409006714                                 | 27.14546098                                      |
| 0.110540363                                                | 10.64672257                                 | 31.96045419                                      |
| 0.141714679                                                | 5.75580259                                  | 19.52045755                                      |
| 0.166140496                                                | 4.055938823                                 | 14.58208955                                      |
| 0.136479009                                                | 5.293448206                                 | 20.02519894                                      |
| 0.160233953                                                | 4.991757803                                 | 16.270282                                        |
| 0.087378708                                                | 13.49512421                                 | 45.44456347                                      |
| 0.135805602                                                | 6.757301425                                 | 21.6721025                                       |
| 0.148966937                                                | 5.528533713                                 | 18.06955645                                      |
| 0.106678254                                                | 10.31643747                                 | 32.68829982                                      |
| 0.165796879                                                | 3.913728329                                 | 14.62646566                                      |
| 0.100618369                                                | 10.53136213                                 | 35.79156529                                      |
| 0.134559272                                                | 5.521321174                                 | 20.46687211                                      |
| 0.151693064                                                | 5.357844683                                 | 17.66243508                                      |
| 0.087313179                                                | 14.42891393                                 | 46.33796296                                      |
| 0.163463578                                                | 4.045143574                                 | 14.93697868                                      |
| 0.135122299                                                | 5.810970306                                 | 20.48046875                                      |
| 0.136207543                                                | 6.200198127                                 | 21.15111447                                      |
| 0.135636573                                                | 6.633419087                                 | 21.45561665                                      |
| 0.168830688                                                | 4.926930286                                 | 15.54368932                                      |
| 0.151668692                                                | 5.815518687                                 | 18.43086916                                      |
| 0.124831884                                                | 7.518367353                                 | 24.72194062                                      |
| 0.182679459                                                | 3.135744636                                 | 11.9753915                                       |
| 0.128761985                                                | 6.499512197                                 | 22.50730282                                      |
| 0.110917194                                                | 12.29570621                                 | 34.41614124                                      |
| 0.106579881                                                | 9.59843355                                  | 31.85548574                                      |
| 0.135095859                                                | 8.564591887                                 | 24.36946423                                      |
| 0.133052422                                                | 7.478414486                                 | 23.08595745                                      |
| 0.151111697                                                | 5.857712129                                 | 18.4373297                                       |
| 0.108554024                                                | 9.71988913                                  | 31.40146716                                      |
| 0.115594784                                                | 8.184195095                                 | 27.37570546                                      |
| 0.083511248                                                | 15.36904273                                 | 50.41057935                                      |
| 0.14104964                                                 | 4.834690991                                 | 18.66341463                                      |
| 0.153111598                                                | 5.124678192                                 | 17.4605227                                       |
| 0.107954779                                                | 10.13268328                                 | 32.51426369                                      |
| 0.197124268                                                | 2.607342844                                 | 10.67106284                                      |
| 0.140838384                                                | 6.154400393                                 | 20.48973446                                      |
| 0.168482672                                                | 4.138705012                                 | 14.46221865                                      |
| 0.141540602                                                | 5.336879563                                 | 18.96557121                                      |
| 0.142559182                                                | 5.738414405                                 | 19.21493625                                      |
| 0.136333234                                                | 7.299374914                                 | 22.33581762                                      |
| 0.130041746                                                | 5.918483182                                 | 21.90929966                                      |
| 0.184679391                                                | 3.743631947                                 | 12.82843713                                      |
| 0.1276369                                                  | 7.566198225                                 | 24.6612426                                       |
| 0.158827418                                                | 4.60286274                                  | 15.9793694                                       |
| 0.186603132                                                | 3.038189608                                 | 11.71017502                                      |
| 0.158890025                                                | 4.247220179                                 | 15.49468085                                      |
| 0.13100747                                                 | 5.385751418                                 | 21.29891304                                      |
| 0.14227486                                                 | 5.573608457                                 | 19.26917293                                      |
| 0.133382774                                                | 6.006086522                                 | 21.33230769                                      |
| 0.152782128                                                | 5.328951276                                 | 17.72039555                                      |
| 0.117669658                                                | 8.05549867                                  | 27.02255639                                      |
| 0.147718034                                                | 5.389785501                                 | 18.18082524                                      |
| 0.149054062                                                | 6.652442605                                 | 20.01347355                                      |
| 0.113111125                                                | 12.15454495                                 | 33.75651189                                      |
| 0.142718512                                                | 6.404264894                                 | 20.19700375                                      |
| 0.13898092                                                 | 7.544560494                                 | 22.2281914                                       |
| 0.136936592                                                | 6.690587006                                 | 21.48930867                                      |
| 0.128261497                                                | 5.644505688                                 | 22.90379747                                      |
| 0.115760839                                                | 9.158952263                                 | 28.7410668                                       |
| 0.11497657                                                 | 9.473869924                                 | 29.36656442                                      |
| 0.137845248                                                | 6.677865882                                 | 21.18848                                         |
| 0.156202917                                                | 5.400873455                                 | 17.16049172                                      |
| 0.109426505                                                | 8.042550466                                 | 29.84610076                                      |
| 0.128814076                                                | 6.885340236                                 | 23.10161663                                      |
| 0.110133177                                                | 10.27107742                                 | 31.57715618                                      |
| 0.120843322                                                | 8.863616349                                 | 27.22290478                                      |
| 0.178800023                                                | 3.668394838                                 | 13.13103143                                      |
| 0.175094033                                                | 3.91548828                                  | 13.66240818                                      |
| 0.13708214                                                 | 5.885616814                                 | 20.50968703                                      |
| 0.124179559                                                | 7.071660196                                 | 24.2754591                                       |
| 0.132768337                                                | 6.104998671                                 | 21.50939457                                      |
| 0.137299839                                                | 5.477009962                                 | 19.94551845                                      |
| 0.162058454                                                | 4.707628204                                 | 15.77982044                                      |
| 0.176008519                                                | 4.079561773                                 | 13.71794872                                      |
| 0.131378343                                                | 7.098828606                                 | 22.71428571                                      |
| 0.10940759                                                 | 10.75920213                                 | 32.57601713                                      |
| 0.126825085                                                | 6.229784009                                 | 23.93654409                                      |
| 0.141152527                                                | 6.395217056                                 | 20.46617466                                      |
| 0.0676593                                                  | 18.89078084                                 | 72.20365535                                      |
| 0.141716089                                                | 7.283794154                                 | 21.47631027                                      |
| 0.128611793                                                | 8.477649721                                 | 25.43690737                                      |
| 0.133960965                                                | 7.280539879                                 | 22.80327869                                      |
| 0.113544886                                                | 9.478634598                                 | 29.70419753                                      |
| 0.088024342                                                | 13.58914524                                 | 45.34202454                                      |
| 0.183281271                                                | 3.554741304                                 | 12.65071369                                      |
| 0.157413395                                                | 4.443978666                                 | 16.03916651                                      |
| 0.121968228                                                | 7.959853444                                 | 25.73757576                                      |
| 0.167387226                                                | 3.811805382                                 | 14.38924632                                      |
| 0.115886445                                                | 11.08213912                                 | 31.57218001                                      |
| 0.141203523                                                | 5.76975584                                  | 19.88888889                                      |
| 0.132269485                                                | 7.832781887                                 | 23.76408787                                      |
| 0.111223252                                                | 11.00344473                                 | 33.73141487                                      |
| 0.097775175                                                | 11.50984952                                 | 37.45029442                                      |



| log.sigma.1.0.mm.3D_gldm_LargeDependenceLowGrayLevelEmphasis | log.sigma.1.0.mm.3D_gldm_SmallDependenceHighGrayLevelEmphasis | log.sigma.1.0.mm.3D_gldm_LargeDependenceHighGrayLevelEmphasis |
|--------------------------------------------------------------|---------------------------------------------------------------|---------------------------------------------------------------|
| 0.029148967                                                  | 159.1160159                                                   | 6590.619698                                                   |
| 0.205481458                                                  | 29.79722041                                                   | 4322.315508                                                   |
| 0.386460372                                                  | 23.89763179                                                   | 5383.709257                                                   |
| 0.09019216                                                   | 63.47466751                                                   | 5492.230297                                                   |
| 0.118164027                                                  | 46.90372623                                                   | 4627.514358                                                   |
| 0.052133769                                                  | 95.23116456                                                   | 3214.530303                                                   |
| 0.123391654                                                  | 56.79657053                                                   | 6132.692267                                                   |
| 0.11811176                                                   | 70.80511482                                                   | 9311.287001                                                   |
| 0.068095383                                                  | 76.23525969                                                   | 5804.041355                                                   |
| 0.058863719                                                  | 76.96178408                                                   | 3876.011194                                                   |
| 0.144964269                                                  | 34.35286433                                                   | 2949.334218                                                   |
| 0.050495897                                                  | 100.5386014                                                   | 5532.019957                                                   |
| 0.162750504                                                  | 48.91257711                                                   | 12920.70809                                                   |
| 0.068913619                                                  | 84.57592775                                                   | 7149.170064                                                   |
| 0.051350117                                                  | 109.3077283                                                   | 6647.609879                                                   |
| 0.13154115                                                   | 54.03787747                                                   | 8341.037477                                                   |
| 0.134997439                                                  | 37.25903694                                                   | 1825.157454                                                   |
| 0.161215461                                                  | 39.85399949                                                   | 8125.970803                                                   |
| 0.092660386                                                  | 53.48176495                                                   | 4680.455316                                                   |
| 0.062675557                                                  | 86.8334381                                                    | 5228.92614                                                    |
| 0.282230069                                                  | 31.17916313                                                   | 7724.726521                                                   |
| 0.109348628                                                  | 42.27381615                                                   | 2261.333642                                                   |
| 0.073009393                                                  | 74.0378118                                                    | 5968.001953                                                   |
| 0.097468648                                                  | 57.88338046                                                   | 4763.630147                                                   |
| 0.086601581                                                  | 74.94598567                                                   | 5603.475255                                                   |
| 0.04390451                                                   | 127.3304904                                                   | 5762.25707                                                    |
| 0.07436882                                                   | 77.17230272                                                   | 4818.169502                                                   |
| 0.087415632                                                  | 66.164601                                                     | 7203.738957                                                   |
| 0.092799361                                                  | 52.00840464                                                   | 1736.440716                                                   |
| 0.088080761                                                  | 60.53185058                                                   | 5934.163096                                                   |
| 0.107595279                                                  | 77.14068799                                                   | 11217.63115                                                   |
| 0.129101757                                                  | 50.60392301                                                   | 8061.665539                                                   |
| 0.099622295                                                  | 71.60941166                                                   | 6177.165686                                                   |
| 0.108274452                                                  | 61.97270348                                                   | 5237.834468                                                   |
| 0.094870852                                                  | 61.76157461                                                   | 3815.110581                                                   |
| 0.143672065                                                  | 50.60016266                                                   | 7042.465488                                                   |
| 0.058134913                                                  | 112.3770811                                                   | 13121.8366                                                    |
| 0.117986642                                                  | 78.24700602                                                   | 21742.91029                                                   |
| 0.066211604                                                  | 67.25883017                                                   | 5509.649593                                                   |
| 0.135261698                                                  | 40.94199125                                                   | 2473.610729                                                   |
| 0.239806048                                                  | 27.93944407                                                   | 4642.898998                                                   |
| 0.073091296                                                  | 59.44567909                                                   | 1800.430049                                                   |
| 0.08105707                                                   | 62.96474075                                                   | 5386.113879                                                   |
| 0.052503232                                                  | 89.29665149                                                   | 4318.471061                                                   |
| 0.058001315                                                  | 92.36880194                                                   | 6477.873239                                                   |
| 0.119002021                                                  | 52.43559291                                                   | 3297.638251                                                   |
| 0.102673743                                                  | 64.14024424                                                   | 5072.963832                                                   |
| 0.155706593                                                  | 33.28455632                                                   | 3284.385763                                                   |
| 0.084015577                                                  | 57.79901347                                                   | 2322.345476                                                   |
| 0.085413958                                                  | 67.22043147                                                   | 7330.723373                                                   |
| 0.055939058                                                  | 88.2413874                                                    | 4790.821331                                                   |
| 0.05522866                                                   | 76.78349304                                                   | 2736.768911                                                   |
| 0.082798848                                                  | 57.91468197                                                   | 3113.923759                                                   |
| 0.15151823                                                   | 33.6491477                                                    | 3175.214674                                                   |
| 0.0880886                                                    | 63.63045571                                                   | 4445.761654                                                   |
| 0.132797123                                                  | 39.74606575                                                   | 3639.23641                                                    |
| 0.080148767                                                  | 63.53403196                                                   | 4140.329295                                                   |
| 0.097181913                                                  | 62.76310499                                                   | 7706.491324                                                   |
| 0.064235212                                                  | 84.0511832                                                    | 5348.952063                                                   |
| 0.074372329                                                  | 82.25642355                                                   | 5618.056523                                                   |
| 0.118568534                                                  | 72.25428821                                                   | 9790.823896                                                   |
| 0.051192671                                                  | 111.0301476                                                   | 8241.272285                                                   |
| 0.061988768                                                  | 104.5823799                                                   | 8172.079461                                                   |
| 0.076073472                                                  | 74.67741265                                                   | 6292.115834                                                   |
| 0.237811422                                                  | 20.43782402                                                   | 2343.913924                                                   |
| 0.102370534                                                  | 66.85801997                                                   | 8271.545313                                                   |
| 0.136689329                                                  | 51.06715776                                                   | 6540.06365                                                    |
| 0.066934495                                                  | 85.42507948                                                   | 6913.52064                                                    |
| 0.043349461                                                  | 123.3634278                                                   | 7040.122247                                                   |
| 0.156931058                                                  | 36.06680052                                                   | 5819.188406                                                   |
| 0.14448298                                                   | 41.00912824                                                   | 3935.015396                                                   |
| 0.126600066                                                  | 62.56536747                                                   | 8132.826107                                                   |
| 0.124815293                                                  | 56.59210344                                                   | 6164.39491                                                    |
| 0.066992691                                                  | 71.34070969                                                   | 3021.269146                                                   |
| 0.089297428                                                  | 55.28946578                                                   | 2348.347493                                                   |
| 0.12611814                                                   | 42.30509304                                                   | 3546.140089                                                   |
| 0.126911683                                                  | 48.18347726                                                   | 4795.240401                                                   |
| 0.1150178                                                    | 46.52386247                                                   | 4257.343424                                                   |
| 0.105507667                                                  | 47.71564836                                                   | 3960.466315                                                   |
| 0.077782574                                                  | 70.29936175                                                   | 3524.259513                                                   |
| 0.029565362                                                  | 159.3867408                                                   | 6706.429361                                                   |
| 0.124455283                                                  | 51.70717259                                                   | 4447.384102                                                   |
| 0.116639691                                                  | 65.06899362                                                   | 9290.297645                                                   |
| 0.173145469                                                  | 28.12363603                                                   | 3454.44712                                                    |
| 0.095046394                                                  | 60.95395782                                                   | 4658.99221                                                    |
| 0.607968484                                                  | 11.96097403                                                   | 8690.052219                                                   |
| 0.102157435                                                  | 64.08841776                                                   | 4791.589099                                                   |
| 0.130782786                                                  | 52.76125554                                                   | 5165.66229                                                    |
| 0.091922257                                                  | 67.63446243                                                   | 5882.352459                                                   |
| 0.117252236                                                  | 57.33255412                                                   | 7704.034074                                                   |
| 0.181053447                                                  | 46.35744004                                                   | 11492.90721                                                   |
| 0.057521343                                                  | 77.74689217                                                   | 2977.184299                                                   |
| 0.086390886                                                  | 55.1043161                                                    | 3221.012927                                                   |
| 0.134444641                                                  | 48.37534823                                                   | 5111.66303                                                    |
| 0.067828002                                                  | 65.06286032                                                   | 3273.699908                                                   |
| 0.060565237                                                  | 132.0595376                                                   | 16749.82466                                                   |
| 0.125102957                                                  | 42.49188884                                                   | 3369.445864                                                   |
| 0.086239803                                                  | 74.36851531                                                   | 6868.334288                                                   |
| 0.294064274                                                  | 21.91815987                                                   | 4020.140288                                                   |
| 0.131807319                                                  | 57.71918113                                                   | 10776.14409                                                   |

| log.sigma.1.0.mm.3D_gldm_SmallDependenceLowGrayLevelEmphasis | log.sigma.1.0.mm.3D_gldm_LowGrayLevelEmphasis | log.sigma.1.0.mm.3D_gldm_DistanceZoneVariabilityNormalized |
|--------------------------------------------------------------|-----------------------------------------------|------------------------------------------------------------|
| 0.001425939                                                  | 0.00286403                                    | 0.992565159                                                |
| 0.004278647                                                  | 0.009702815                                   | 1                                                          |
| 0.004888556                                                  | 0.012136711                                   | 1                                                          |
| 0.003903013                                                  | 0.007165826                                   | 1                                                          |
| 0.003224792                                                  | 0.007329462                                   | 1                                                          |
| 0.003869574                                                  | 0.00653796                                    | 1                                                          |
| 0.001761125                                                  | 0.00526123                                    | 0.994712529                                                |
| 0.001479196                                                  | 0.004158461                                   | 0.998457981                                                |
| 0.001591478                                                  | 0.004217061                                   | 0.998449613                                                |
| 0.002920865                                                  | 0.005687671                                   | 1                                                          |
| 0.00353455                                                   | 0.009434708                                   | 1                                                          |
| 0.002321035                                                  | 0.004441205                                   | 0.992238151                                                |
| 0.002173013                                                  | 0.005158706                                   | 1                                                          |
| 0.001802766                                                  | 0.004218462                                   | 1                                                          |
| 0.001817531                                                  | 0.003810339                                   | 1                                                          |
| 0.001804599                                                  | 0.005096227                                   | 1                                                          |
| 0.006295716                                                  | 0.013489239                                   | 1                                                          |
| 0.002133224                                                  | 0.005898585                                   | 1                                                          |
| 0.00226078                                                   | 0.005779516                                   | 1                                                          |
| 0.002432671                                                  | 0.004951645                                   | 0.996323542                                                |
| 0.001771394                                                  | 0.006871093                                   | 1                                                          |
| 0.006754371                                                  | 0.011993187                                   | 1                                                          |
| 0.002233853                                                  | 0.004872155                                   | 1                                                          |
| 0.002151815                                                  | 0.005608937                                   | 0.994505536                                                |
| 0.003169532                                                  | 0.006159123                                   | 1                                                          |
| 0.001541086                                                  | 0.003473357                                   | 1                                                          |
| 0.002231179                                                  | 0.005175143                                   | 1                                                          |
| 0.001904144                                                  | 0.00463467                                    | 1                                                          |
| 0.00571766                                                   | 0.010905032                                   | 1                                                          |
| 0.002091582                                                  | 0.005089531                                   | 1                                                          |
| 0.001499426                                                  | 0.003934891                                   | 1                                                          |
| 0.001867295                                                  | 0.005175928                                   | 0.991247434                                                |
| 0.001972272                                                  | 0.005035306                                   | 1                                                          |
| 0.004401965                                                  | 0.007941118                                   | 1                                                          |
| 0.003291755                                                  | 0.007002564                                   | 0.994257047                                                |
| 0.001951965                                                  | 0.005635782                                   | 0.99705883                                                 |
| 0.000986372                                                  | 0.002610629                                   | 1                                                          |
| 0.000790076                                                  | 0.00272724                                    | 0.993833564                                                |
| 0.002351803                                                  | 0.005068357                                   | 1                                                          |
| 0.003961274                                                  | 0.009854108                                   | 0.998161766                                                |
| 0.003701986                                                  | 0.010480098                                   | 1                                                          |
| 0.00364717                                                   | 0.008396091                                   | 0.997250864                                                |
| 0.001866365                                                  | 0.004890739                                   | 1                                                          |
| 0.002777259                                                  | 0.00538547                                    | 1                                                          |
| 0.002363674                                                  | 0.004507789                                   | 1                                                          |
| 0.003408343                                                  | 0.007925106                                   | 1                                                          |
| 0.00218605                                                   | 0.005772781                                   | 0.998497371                                                |
| 0.006772922                                                  | 0.012339304                                   | 1                                                          |
| 0.007313165                                                  | 0.012035582                                   | 1                                                          |
| 0.001809733                                                  | 0.004442378                                   | 0.993902496                                                |
| 0.0021453                                                    | 0.004581794                                   | 1                                                          |
| 0.002683311                                                  | 0.005919187                                   | 1                                                          |
| 0.002844906                                                  | 0.006796778                                   | 0.99858357                                                 |
| 0.004636668                                                  | 0.010228459                                   | 1                                                          |
| 0.003601859                                                  | 0.006927002                                   | 1                                                          |
| 0.005071014                                                  | 0.009829792                                   | 1                                                          |
| 0.002323895                                                  | 0.005706848                                   | 0.995238122                                                |
| 0.001539603                                                  | 0.004404736                                   | 1                                                          |
| 0.002191336                                                  | 0.004703567                                   | 1                                                          |
| 0.001594384                                                  | 0.004336448                                   | 0.997157078                                                |
| 0.001939811                                                  | 0.004579661                                   | 1                                                          |
| 0.001534932                                                  | 0.003353832                                   | 1                                                          |
| 0.001232955                                                  | 0.003244241                                   | 0.99318577                                                 |
| 0.001866037                                                  | 0.004548341                                   | 0.980209329                                                |
| 0.004938957                                                  | 0.013739059                                   | 1                                                          |
| 0.001660759                                                  | 0.004464206                                   | 0.987448199                                                |
| 0.002952474                                                  | 0.006740708                                   | 1                                                          |
| 0.001428814                                                  | 0.0037702                                     | 0.991179886                                                |
| 0.001358922                                                  | 0.003128181                                   | 1                                                          |
| 0.0021694                                                    | 0.006430453                                   | 1                                                          |
| 0.004431252                                                  | 0.009507416                                   | 1                                                          |
| 0.0025782                                                    | 0.005687767                                   | 0.996108964                                                |
| 0.00232691                                                   | 0.005829398                                   | 1                                                          |
| 0.002959926                                                  | 0.007121408                                   | 1                                                          |
| 0.004419956                                                  | 0.009163259                                   | 0.994570176                                                |
| 0.003630138                                                  | 0.008474493                                   | 1                                                          |
| 0.002259398                                                  | 0.006296988                                   | 1                                                          |
| 0.005185611                                                  | 0.009131848                                   | 1                                                          |
| 0.002842044                                                  | 0.006949303                                   | 1                                                          |
| 0.003322684                                                  | 0.006967567                                   | 1                                                          |
| 0.001442232                                                  | 0.002875137                                   | 1                                                          |
| 0.004688449                                                  | 0.009033269                                   | 1                                                          |
| 0.001597097                                                  | 0.004399302                                   | 0.997490594                                                |
| 0.002451826                                                  | 0.008481381                                   | 1                                                          |
| 0.002540641                                                  | 0.006050592                                   | 1                                                          |
| 0.003179571                                                  | 0.010949926                                   | 1                                                          |
| 0.003339384                                                  | 0.006886981                                   | 1                                                          |
| 0.00252683                                                   | 0.006559044                                   | 1                                                          |
| 0.002246258                                                  | 0.005323173                                   | 1                                                          |
| 0.00214349                                                   | 0.00519859                                    | 1                                                          |
| 0.001579588                                                  | 0.004858164                                   | 1                                                          |
| 0.002652656                                                  | 0.005727098                                   | 0.997706425                                                |
| 0.003219808                                                  | 0.007296328                                   | 0.991048774                                                |
| 0.00240906                                                   | 0.006425467                                   | 1                                                          |
| 0.002265376                                                  | 0.00571956                                    | 0.998559079                                                |
| 0.000933574                                                  | 0.002382867                                   | 0.99782609                                                 |
| 0.003401502                                                  | 0.008335859                                   | 1                                                          |
| 0.002882246                                                  | 0.005635312                                   | 1                                                          |
| 0.003966915                                                  | 0.011641297                                   | 1                                                          |
| 0.001105238                                                  | 0.003924307                                   | 1                                                          |

| log.sigma.1.0.mm.3D_gldzm_LowIntensityEmphasis | log.sigma.1.0.mm.3D_gldzm_LargeDistanceEmphasis | log.sigma.1.0.mm.3D_gldzm_HighIntensitySmallDistanceEmphasis |
|------------------------------------------------|-------------------------------------------------|--------------------------------------------------------------|
| 0.004039685                                    | 1.01119403                                      | 475.2322761                                                  |
| 0.019451511                                    | 1                                               | 141.4759615                                                  |
| 0.024628382                                    | 1                                               | 126.1090343                                                  |
| 0.014046869                                    | 1                                               | 240.8391608                                                  |
| 0.012366479                                    | 1                                               | 178.4150077                                                  |
| 0.010583176                                    | 1                                               | 276.0555556                                                  |
| 0.007045113                                    | 1.007952286                                     | 227.1520875                                                  |
| 0.00603715                                     | 1.002314815                                     | 292.9645062                                                  |
| 0.00593083                                     | 1.002327386                                     | 281.867533                                                   |
| 0.009229957                                    | 1                                               | 255.2640449                                                  |
| 0.014855111                                    | 1                                               | 139.1488251                                                  |
| 0.007238966                                    | 1.011688312                                     | 325.7522727                                                  |
| 0.012087942                                    | 1                                               | 281.7725948                                                  |
| 0.006776312                                    | 1                                               | 319.3039832                                                  |
| 0.005810853                                    | 1                                               | 360.7039877                                                  |
| 0.008341109                                    | 1                                               | 245.3629929                                                  |
| 0.02088549                                     | 1                                               | 127.1857506                                                  |
| 0.011935974                                    | 1                                               | 210.7733333                                                  |
| 0.009134851                                    | 1                                               | 218.452381                                                   |
| 0.008063553                                    | 1.005524862                                     | 297.0007673                                                  |
| 0.009899028                                    | 1                                               | 171.2918919                                                  |
| 0.021798002                                    | 1                                               | 143.0228571                                                  |
| 0.008223536                                    | 1                                               | 282.024055                                                   |
| 0.008323582                                    | 1.008264463                                     | 231.5733471                                                  |
| 0.011535449                                    | 1                                               | 280.9194444                                                  |
| 0.004634944                                    | 1                                               | 396.193662                                                   |
| 0.00748868                                     | 1                                               | 267.1108949                                                  |
| 0.007860787                                    | 1                                               | 276.3453757                                                  |
| 0.016423682                                    | 1                                               | 154.0838323                                                  |
| 0.00839173                                     | 1                                               | 244.1837121                                                  |
| 0.006228843                                    | 1                                               | 326.8193172                                                  |
| 0.008856965                                    | 1.013186813                                     | 229.121978                                                   |
| 0.007196388                                    | 1                                               | 264.3375796                                                  |
| 0.015950864                                    | 1                                               | 232.5616642                                                  |
| 0.010971976                                    | 1.008639309                                     | 212.5827934                                                  |
| 0.008951068                                    | 1.004418262                                     | 228.8324742                                                  |
| 0.004167882                                    | 1                                               | 469.6254218                                                  |
| 0.004367578                                    | 1.009278351                                     | 438.3590206                                                  |
| 0.009192354                                    | 1                                               | 266.3784615                                                  |
| 0.014212041                                    | 1.00275989                                      | 147.8846596                                                  |
| 0.019081581                                    | 1                                               | 133.2786885                                                  |
| 0.010735411                                    | 1.004129387                                     | 179.4778045                                                  |
| 0.007237309                                    | 1                                               | 246.5866534                                                  |
| 0.008571092                                    | 1                                               | 284.4081395                                                  |
| 0.008163697                                    | 1                                               | 331.056                                                      |
| 0.011851673                                    | 1                                               | 183.7891566                                                  |
| 0.008113199                                    | 1.002255639                                     | 235.8430451                                                  |
| 0.028147717                                    | 1                                               | 139.9861111                                                  |
| 0.02019751                                     | 1                                               | 175.6936937                                                  |
| 0.007660979                                    | 1.009174312                                     | 290.0825688                                                  |
| 0.007067112                                    | 1                                               | 302.8539604                                                  |
| 0.007886419                                    | 1                                               | 232.040032                                                   |
| 0.009746105                                    | 1.002126152                                     | 196.6399717                                                  |
| 0.020550668                                    | 1                                               | 151.8346457                                                  |
| 0.012731753                                    | 1                                               | 239.0280612                                                  |
| 0.020581338                                    | 1                                               | 163.4329268                                                  |
| 0.008121529                                    | 1.007159905                                     | 225.1945107                                                  |
| 0.006888009                                    | 1                                               | 278.0188917                                                  |
| 0.007308055                                    | 1                                               | 280.8681102                                                  |
| 0.005602541                                    | 1.004270463                                     | 290.872331                                                   |
| 0.00755073                                     | 1                                               | 290.8216561                                                  |
| 0.005302252                                    | 1                                               | 396.9640644                                                  |
| 0.004293451                                    | 1.01025641                                      | 372.7264957                                                  |
| 0.00705993                                     | 1.029985721                                     | 283.1136364                                                  |
| 0.024259074                                    | 1                                               | 99.43930636                                                  |
| 0.007054334                                    | 1.018947368                                     | 281.1376316                                                  |
| 0.012559255                                    | 1                                               | 212.4797508                                                  |
| 0.005174552                                    | 1.013289037                                     | 311.3971484                                                  |
| 0.004302089                                    | 1                                               | 397.6399796                                                  |
| 0.01141935                                     | 1                                               | 187.5045208                                                  |
| 0.017657746                                    | 1                                               | 164.7238372                                                  |
| 0.010964515                                    | 1.005847953                                     | 268.9885478                                                  |
| 0.009155285                                    | 1                                               | 227.4590164                                                  |
| 0.009613194                                    | 1                                               | 224.7372986                                                  |
| 0.013533934                                    | 1.008166969                                     | 174.5594374                                                  |
| 0.01391578                                     | 1                                               | 162                                                          |
| 0.009490726                                    | 1                                               | 206.3112245                                                  |
| 0.020072988                                    | 1                                               | 185.2380952                                                  |
| 0.011049225                                    | 1                                               | 191.2633833                                                  |
| 0.010653532                                    | 1                                               | 228.9131545                                                  |
| 0.004093633                                    | 1                                               | 479.770557                                                   |
| 0.016959934                                    | 1                                               | 187.8811321                                                  |
| 0.006902077                                    | 1.003768844                                     | 284.3128141                                                  |
| 0.012555324                                    | 1                                               | 139.4822006                                                  |
| 0.009072389                                    | 1                                               | 220.204918                                                   |
| 0.028033345                                    | 1                                               | 99.36723164                                                  |
| 0.011274806                                    | 1                                               | 217.9221477                                                  |
| 0.010137867                                    | 1                                               | 213.6305556                                                  |
| 0.00858703                                     | 1                                               | 259.582716                                                   |
| 0.009204512                                    | 1                                               | 244.2328482                                                  |
| 0.009041449                                    | 1                                               | 265.1013216                                                  |
| 0.007771856                                    | 1.003444317                                     | 237.8705511                                                  |
| 0.011362122                                    | 1.013487476                                     | 192.5637444                                                  |
| 0.00982407                                     | 1                                               | 199.9010727                                                  |
| 0.007673851                                    | 1.002162942                                     | 223.7355804                                                  |
| 0.00364985                                     | 1.003264418                                     | 530.7181719                                                  |
| 0.013165736                                    | 1                                               | 166.8490323                                                  |
| 0.01028819                                     | 1                                               | 276.7973856                                                  |
| 0.020238587                                    | 1                                               | 112.1213873                                                  |
| 0.005520072                                    | 1                                               | 291.1341256                                                  |

| log.sigma.1.0.mm.3D_gldzm_LowIntensityLargeDistanceEmphasis | log.sigma.1.0.mm.3D_gldzm_HighIntensityEmphasis | log.sigma.1.0.mm.3D_gldzm_DistanceZoneVariability | log.sigma.1.0.mm.3D_gldzm_ZonePercentage |
|-------------------------------------------------------------|-------------------------------------------------|---------------------------------------------------|------------------------------------------|
| 0.004081611                                                 | 476.608209                                      | 798.0223881                                       | 0.378887842                              |
| 0.019451511                                                 | 141.4759615                                     | 208                                               | 0.222459893                              |
| 0.024628382                                                 | 126.1090343                                     | 321                                               | 0.209256845                              |
| 0.014046869                                                 | 240.8391608                                     | 286                                               | 0.292732856                              |
| 0.012366479                                                 | 178.4150077                                     | 653                                               | 0.275760135                              |
| 0.010583176                                                 | 276.0555556                                     | 252                                               | 0.381818182                              |
| 0.007111341                                                 | 227.5904573                                     | 1501.021206                                       | 0.267032384                              |
| 0.006056863                                                 | 293.0223765                                     | 1294.001543                                       | 0.253719655                              |
| 0.00593523                                                  | 282.1753297                                     | 1287.001552                                       | 0.283545974                              |
| 0.009229957                                                 | 255.2640449                                     | 356                                               | 0.332089552                              |
| 0.014855111                                                 | 139.1488251                                     | 383                                               | 0.25397878                               |
| 0.007577204                                                 | 326.0649351                                     | 764.0233766                                       | 0.334056399                              |
| 0.012087942                                                 | 281.7725948                                     | 343                                               | 0.183717193                              |
| 0.006776312                                                 | 319.3039832                                     | 477                                               | 0.277810134                              |
| 0.005810853                                                 | 360.7039877                                     | 652                                               | 0.328629032                              |
| 0.008341109                                                 | 245.3629929                                     | 989                                               | 0.226005484                              |
| 0.02088549                                                  | 127.1857506                                     | 393                                               | 0.329145729                              |
| 0.011935974                                                 | 210.7733333                                     | 225                                               | 0.182481752                              |
| 0.009134851                                                 | 218.452381                                      | 336                                               | 0.258859784                              |
| 0.008210786                                                 | 297.1356661                                     | 1623.01105                                        | 0.313329486                              |
| 0.009899028                                                 | 171.2918919                                     | 555                                               | 0.183531746                              |
| 0.021798002                                                 | 143.0228571                                     | 350                                               | 0.324374421                              |
| 0.008223536                                                 | 282.024055                                      | 291                                               | 0.284179688                              |
| 0.008397518                                                 | 232.0950413                                     | 722.0110193                                       | 0.274272762                              |
| 0.011535449                                                 | 280.9194444                                     | 360                                               | 0.282796544                              |
| 0.004634944                                                 | 396.193662                                      | 852                                               | 0.35964542                               |
| 0.00748868                                                  | 267.1108949                                     | 1028                                              | 0.317970925                              |
| 0.007860787                                                 | 276.3453757                                     | 692                                               | 0.250543085                              |
| 0.016423682                                                 | 154.0838323                                     | 167                                               | 0.37360179                               |
| 0.00839173                                                  | 244.1837121                                     | 528                                               | 0.257059396                              |
| 0.006228843                                                 | 326.8193172                                     | 1201                                              | 0.252416982                              |
| 0.008914244                                                 | 229.9956044                                     | 451.0175824                                       | 0.219913001                              |
| 0.007196388                                                 | 264.3375796                                     | 942                                               | 0.291731186                              |
| 0.015950864                                                 | 232.5616642                                     | 673                                               | 0.286382979                              |
| 0.011148064                                                 | 212.938085                                      | 1381.023038                                       | 0.315395095                              |
| 0.008987583                                                 | 228.9661267                                     | 677.0029455                                       | 0.226408803                              |
| 0.004167882                                                 | 469.6254218                                     | 889                                               | 0.23891427                               |
| 0.004404898                                                 | 439.2721649                                     | 964.0185567                                       | 0.187948072                              |
| 0.009192354                                                 | 266.3784615                                     | 325                                               | 0.264227642                              |
| 0.014563161                                                 | 147.9636615                                     | 2170.00368                                        | 0.299037139                              |
| 0.019081581                                                 | 133.2786885                                     | 549                                               | 0.211642251                              |
| 0.010785613                                                 | 179.6352374                                     | 1449.005506                                       | 0.37574347                               |
| 0.007237309                                                 | 246.5866534                                     | 1004                                              | 0.274842595                              |
| 0.008571092                                                 | 284.4081395                                     | 860                                               | 0.345659164                              |
| 0.008163697                                                 | 331.056                                         | 375                                               | 0.29342723                               |
| 0.011851673                                                 | 183.7891566                                     | 830                                               | 0.302367942                              |
| 0.008131841                                                 | 235.9112782                                     | 1328.001504                                       | 0.291538799                              |
| 0.028147717                                                 | 139.9861111                                     | 216                                               | 0.247990815                              |
| 0.02019751                                                  | 175.6936937                                     | 333                                               | 0.391304348                              |
| 0.007696816                                                 | 290.6697248                                     | 325.0061162                                       | 0.241863905                              |
| 0.007067112                                                 | 302.8539604                                     | 808                                               | 0.314519268                              |
| 0.007886419                                                 | 232.040032                                      | 1249                                              | 0.370513201                              |
| 0.009779326                                                 | 196.6739901                                     | 1409.001417                                       | 0.312721631                              |
| 0.020550668                                                 | 151.8346457                                     | 254                                               | 0.230072464                              |
| 0.012731753                                                 | 239.0280612                                     | 392                                               | 0.294736842                              |
| 0.020581338                                                 | 163.4329268                                     | 492                                               | 0.252307692                              |
| 0.008303014                                                 | 225.3031026                                     | 1251.01432                                        | 0.310754017                              |
| 0.006888009                                                 | 278.0188917                                     | 794                                               | 0.229612493                              |
| 0.007308055                                                 | 280.8681102                                     | 508                                               | 0.308252427                              |
| 0.00562589                                                  | 291.0765125                                     | 2802.011388                                       | 0.307810275                              |
| 0.00755073                                                  | 290.8216561                                     | 471                                               | 0.266704417                              |
| 0.005302252                                                 | 396.9640644                                     | 807                                               | 0.302247191                              |
| 0.004375237                                                 | 373.3726496                                     | 1743.041026                                       | 0.303161168                              |
| 0.007282332                                                 | 284.6611138                                     | 2059.4198                                         | 0.275613276                              |
| 0.024259074                                                 | 99.43930636                                     | 173                                               | 0.218987342                              |
| 0.011397106                                                 | 282.0368421                                     | 938.0757895                                       | 0.245986535                              |
| 0.012559255                                                 | 212.4797508                                     | 321                                               | 0.246165644                              |
| 0.005250021                                                 | 312.0636766                                     | 1790.070875                                       | 0.28896                                  |
| 0.004302089                                                 | 397.6399796                                     | 1961                                              | 0.334813044                              |
| 0.01141935                                                  | 187.5045208                                     | 553                                               | 0.190821256                              |
| 0.017657746                                                 | 164.7238372                                     | 344                                               | 0.264819092                              |
| 0.011008986                                                 | 269.1822612                                     | 1022.007797                                       | 0.239160839                              |
| 0.009155285                                                 | 227.4590164                                     | 610                                               | 0.267661255                              |
| 0.009613194                                                 | 224.7372986                                     | 807                                               | 0.357237716                              |
| 0.013665637                                                 | 174.6914701                                     | 1096.016334                                       | 0.351964229                              |
| 0.01391578                                                  | 162                                             | 370                                               | 0.275707899                              |
| 0.009490726                                                 | 206.3112245                                     | 588                                               | 0.245409015                              |
| 0.020072988                                                 | 185.2380952                                     | 252                                               | 0.263048017                              |
| 0.011049225                                                 | 191.2633833                                     | 467                                               | 0.273579379                              |
| 0.010653532                                                 | 228.9131545                                     | 783                                               | 0.334758444                              |
| 0.004093633                                                 | 479.770557                                      | 754                                               | 0.379084967                              |
| 0.016959934                                                 | 187.8811321                                     | 530                                               | 0.294608116                              |
| 0.006921306                                                 | 284.4974874                                     | 794.0025126                                       | 0.243499541                              |
| 0.012555324                                                 | 139.4822006                                     | 618                                               | 0.201106411                              |
| 0.009072389                                                 | 220.204918                                      | 732                                               | 0.300123001                              |
| 0.028033345                                                 | 99.36723164                                     | 177                                               | 0.115535248                              |
| 0.011274806                                                 | 217.9221477                                     | 745                                               | 0.312368973                              |
| 0.010137867                                                 | 213.6305556                                     | 720                                               | 0.262582057                              |
| 0.00858703                                                  | 259.582716                                      | 405                                               | 0.276639344                              |
| 0.009204512                                                 | 244.2328482                                     | 481                                               | 0.237530864                              |
| 0.009041449                                                 | 265.1013216                                     | 227                                               | 0.174079755                              |
| 0.007781397                                                 | 238.1814007                                     | 869.0022962                                       | 0.36565911                               |
| 0.011466221                                                 | 193.2048812                                     | 1543.062942                                       | 0.300405171                              |
| 0.00982407                                                  | 199.9010727                                     | 839                                               | 0.254242424                              |
| 0.007679842                                                 | 223.9307859                                     | 1385.001442                                       | 0.318704044                              |
| 0.003662602                                                 | 530.9270947                                     | 917.0021763                                       | 0.2685564                                |
| 0.013165736                                                 | 166.8490323                                     | 775                                               | 0.275115371                              |
| 0.01028819                                                  | 276.7973856                                     | 306                                               | 0.29226361                               |
| 0.020238587                                                 | 112.1213873                                     | 173                                               | 0.207434053                              |
| 0.005520072                                                 | 291.1341256                                     | 1178                                              | 0.204018012                              |

| log.sigma.1.0.mm.3D_gldzm_IntensityVariabilityNormalized | log.sigma.1.0.mm.3D_gldzm_LowIntensitySmallDistanceEmphasis | log.sigma.1.0.mm.3D_gldzm_IntensityVariability |
|----------------------------------------------------------|-------------------------------------------------------------|------------------------------------------------|
| 0.058275166                                              | 0.004029203                                                 | 46.8532383                                     |
| 0.084781805                                              | 0.019451511                                                 | 17.63461538                                    |
| 0.089391601                                              | 0.024628382                                                 | 28.69470405                                    |
| 0.07015013                                               | 0.014046869                                                 | 20.06293706                                    |
| 0.073785966                                              | 0.012366479                                                 | 48.18223583                                    |
| 0.064531368                                              | 0.010583176                                                 | 16.26190476                                    |
| 0.078628296                                              | 0.007028555                                                 | 118.6500994                                    |
| 0.070825713                                              | 0.006027928                                                 | 91.79012346                                    |
| 0.070171247                                              | 0.00592973                                                  | 90.45073701                                    |
| 0.068283676                                              | 0.009229957                                                 | 24.30898876                                    |
| 0.086530006                                              | 0.014855111                                                 | 33.14099217                                    |
| 0.063606004                                              | 0.007154407                                                 | 48.97662338                                    |
| 0.08062117                                               | 0.012087942                                                 | 27.65306122                                    |
| 0.067565014                                              | 0.006776312                                                 | 32.22851153                                    |
| 0.060225263                                              | 0.005810853                                                 | 39.26687117                                    |
| 0.078529139                                              | 0.008341109                                                 | 77.6653185                                     |
| 0.07463305                                               | 0.02088549                                                  | 29.3307888                                     |
| 0.084760494                                              | 0.011935974                                                 | 19.07111111                                    |
| 0.086663832                                              | 0.009134851                                                 | 29.11904762                                    |
| 0.067783472                                              | 0.008026745                                                 | 110.4192756                                    |
| 0.096449963                                              | 0.00989028                                                  | 53.52972973                                    |
| 0.075297959                                              | 0.021798002                                                 | 26.35428571                                    |
| 0.077904134                                              | 0.008223536                                                 | 22.67013039                                    |
| 0.076949055                                              | 0.008305098                                                 | 55.86501377                                    |
| 0.071157407                                              | 0.011535449                                                 | 25.61666667                                    |
| 0.060710507                                              | 0.004634944                                                 | 51.72535211                                    |
| 0.064754955                                              | 0.00748868                                                  | 66.56809339                                    |
| 0.075311571                                              | 0.007860787                                                 | 52.11560694                                    |
| 0.078991717                                              | 0.016423682                                                 | 13.19161677                                    |
| 0.082895719                                              | 0.00839173                                                  | 43.76893939                                    |
| 0.069667866                                              | 0.006228843                                                 | 83.67110741                                    |
| 0.081289699                                              | 0.008842646                                                 | 36.98681319                                    |
| 0.066480047                                              | 0.007196388                                                 | 62.62420382                                    |
| 0.065001358                                              | 0.015950864                                                 | 43.74591382                                    |
| 0.064755943                                              | 0.010927954                                                 | 89.94600432                                    |
| 0.077370559                                              | 0.008941939                                                 | 52.53460972                                    |
| 0.067419441                                              | 0.004167882                                                 | 59.93588301                                    |
| 0.072464661                                              | 0.004358248                                                 | 70.29072165                                    |
| 0.085557396                                              | 0.009192354                                                 | 27.80615385                                    |
| 0.073576744                                              | 0.014124261                                                 | 159.9558418                                    |
| 0.085285052                                              | 0.019081581                                                 | 46.82149362                                    |
| 0.065637746                                              | 0.010722861                                                 | 95.37164487                                    |
| 0.075046428                                              | 0.007237309                                                 | 75.34661355                                    |
| 0.062368848                                              | 0.008571092                                                 | 53.6372093                                     |
| 0.071815111                                              | 0.008163697                                                 | 26.93066667                                    |
| 0.071400784                                              | 0.011851673                                                 | 59.2626506                                     |
| 0.069748431                                              | 0.008108539                                                 | 92.76541353                                    |
| 0.08590535                                               | 0.028147717                                                 | 18.55555556                                    |
| 0.070367665                                              | 0.02019751                                                  | 23.43243243                                    |
| 0.080473959                                              | 0.00765202                                                  | 26.31498471                                    |
| 0.065321415                                              | 0.007067112                                                 | 52.77970297                                    |
| 0.065950599                                              | 0.007886419                                                 | 82.37229784                                    |
| 0.071680895                                              | 0.0097378                                                   | 101.1417434                                    |
| 0.085560171                                              | 0.020550668                                                 | 21.73228346                                    |
| 0.071532695                                              | 0.012731753                                                 | 28.04081633                                    |
| 0.079887964                                              | 0.020581338                                                 | 39.30487805                                    |
| 0.070351616                                              | 0.008076157                                                 | 88.43198091                                    |
| 0.077590747                                              | 0.006888009                                                 | 61.6070529                                     |
| 0.071176142                                              | 0.007308055                                                 | 36.15748031                                    |
| 0.064325933                                              | 0.005596704                                                 | 180.7558719                                    |
| 0.075382819                                              | 0.00755073                                                  | 35.50530786                                    |
| 0.065300676                                              | 0.005302252                                                 | 52.6976456                                     |
| 0.065805635                                              | 0.004273004                                                 | 115.4888889                                    |
| 0.067009409                                              | 0.00700433                                                  | 140.7867682                                    |
| 0.099134619                                              | 0.024259074                                                 | 17.15028902                                    |
| 0.076740166                                              | 0.005968641                                                 | 72.90315789                                    |
| 0.081084229                                              | 0.012559255                                                 | 26.02803738                                    |
| 0.071348857                                              | 0.005155685                                                 | 128.8560354                                    |
| 0.069853994                                              | 0.004302089                                                 | 136.9836818                                    |
| 0.090458423                                              | 0.01141935                                                  | 50.02350814                                    |
| 0.08470795                                               | 0.017657746                                                 | 29.13953488                                    |
| 0.069297676                                              | 0.010953398                                                 | 71.0994152                                     |
| 0.067637732                                              | 0.009155285                                                 | 41.25901639                                    |
| 0.062269577                                              | 0.009613194                                                 | 50.25154895                                    |
| 0.0677534                                                | 0.013501008                                                 | 74.66424682                                    |
| 0.080073046                                              | 0.01391578                                                  | 29.62702703                                    |
| 0.085201768                                              | 0.009490726                                                 | 50.09863946                                    |
| 0.079868985                                              | 0.020072988                                                 | 20.12698413                                    |
| 0.08726254                                               | 0.011049225                                                 | 40.751606                                      |
| 0.063382315                                              | 0.010653532                                                 | 49.62835249                                    |
| 0.059002737                                              | 0.004093633                                                 | 44.48806366                                    |
| 0.065987896                                              | 0.016959934                                                 | 34.97358491                                    |
| 0.076282796                                              | 0.00689727                                                  | 60.72110553                                    |
| 0.102805794                                              | 0.012555324                                                 | 63.53398058                                    |
| 0.066170982                                              | 0.009072389                                                 | 48.43715847                                    |
| 0.129113601                                              | 0.028033345                                                 | 22.85310734                                    |
| 0.067119499                                              | 0.011274806                                                 | 50.00402685                                    |
| 0.071608796                                              | 0.010137867                                                 | 51.55833333                                    |
| 0.079689072                                              | 0.00858703                                                  | 32.27407407                                    |
| 0.081262616                                              | 0.009204512                                                 | 39.08731809                                    |
| 0.107104737                                              | 0.009041449                                                 | 24.31277533                                    |
| 0.068595027                                              | 0.007769471                                                 | 59.74626866                                    |
| 0.06740603                                               | 0.011336097                                                 | 104.9511882                                    |
| 0.080493408                                              | 0.00982407                                                  | 67.53396901                                    |
| 0.070437251                                              | 0.007672353                                                 | 97.6964672                                     |
| 0.06331455                                               | 0.003646662                                                 | 58.18607182                                    |
| 0.077637461                                              | 0.013165736                                                 | 60.16903226                                    |
| 0.067901235                                              | 0.01028819                                                  | 20.77777778                                    |
| 0.104480604                                              | 0.020238587                                                 | 18.07514451                                    |
| 0.088152634                                              | 0.005520072                                                 | 103.8438031                                    |

| log.sigma.1.0.mm.3D_gldzm_HighIntensityLargeDistanceEmphasis | log.sigma.1.0.mm.3D_gldzm_SmallDistanceEmphasis | log.sigma.1.0.mm.3D_gldzm_SumVariance | log.sigma.1.0.mm.3D_gldzm_Homogeneity1 |
|--------------------------------------------------------------|-------------------------------------------------|---------------------------------------|----------------------------------------|
| 482.1119403                                                  | 0.997201493                                     | 1543.956327                           | 0.349955103                            |
| 141.4759615                                                  | 1                                               | 426.1790903                           | 0.486401952                            |
| 126.1090343                                                  | 1                                               | 343.9052845                           | 0.51812533                             |
| 240.8391608                                                  | 1                                               | 762.2390922                           | 0.418209309                            |
| 178.4150077                                                  | 1                                               | 570.6917094                           | 0.423210052                            |
| 276.0555556                                                  | 1                                               | 789.2082112                           | 0.366854727                            |
| 229.3439364                                                  | 0.998011928                                     | 685.7837495                           | 0.444102815                            |
| 293.253858                                                   | 0.999421296                                     | 917.2639702                           | 0.459832952                            |
| 283.4065167                                                  | 0.999418154                                     | 909.4671618                           | 0.409604194                            |
| 255.2640449                                                  | 1                                               | 799.2287308                           | 0.392561121                            |
| 139.1488251                                                  | 1                                               | 411.7069508                           | 0.444823164                            |
| 327.3155844                                                  | 0.997077922                                     | 1047.420546                           | 0.378841117                            |
| 281.7725948                                                  | 1                                               | 913.9020352                           | 0.520490202                            |
| 319.3039832                                                  | 1                                               | 1022.138347                           | 0.41175181                             |
| 360.7039877                                                  | 1                                               | 1145.400216                           | 0.381384567                            |
| 245.3629929                                                  | 1                                               | 783.7304352                           | 0.473531907                            |
| 127.1857506                                                  | 1                                               | 326.2411648                           | 0.388385651                            |
| 210.7733333                                                  | 1                                               | 700.5172789                           | 0.498828732                            |
| 218.452381                                                   | 1                                               | 683.2723305                           | 0.436647623                            |
| 297.6752609                                                  | 0.998618785                                     | 906.681986                            | 0.393870882                            |
| 171.2918919                                                  | 1                                               | 503.305621                            | 0.52964296                             |
| 143.0228571                                                  | 1                                               | 409.7925963                           | 0.396998866                            |
| 282.024055                                                   | 1                                               | 905.0464763                           | 0.428817108                            |
| 234.1818182                                                  | 0.997933884                                     | 693.05935                             | 0.43623676                             |
| 280.9194444                                                  | 1                                               | 815.152259                            | 0.429126319                            |
| 396.193662                                                   | 1                                               | 1177.493917                           | 0.373537454                            |
| 267.1108949                                                  | 1                                               | 792.0130349                           | 0.395649903                            |
| 276.3453757                                                  | 1                                               | 900.062944                            | 0.441622196                            |
| 154.0838323                                                  | 1                                               | 406.8430818                           | 0.373995974                            |
| 244.1837121                                                  | 1                                               | 794.921128                            | 0.445799265                            |
| 326.8193172                                                  | 1                                               | 1043.65573                            | 0.458025141                            |
| 233.4901099                                                  | 0.996703297                                     | 772.0130395                           | 0.4709704                              |
| 264.3375796                                                  | 1                                               | 780.3778806                           | 0.420490407                            |
| 232.5616642                                                  | 1                                               | 677.4023506                           | 0.427412227                            |
| 214.3592513                                                  | 0.997840173                                     | 596.6592599                           | 0.405287398                            |
| 229.5007364                                                  | 0.998895434                                     | 689.1171146                           | 0.474594136                            |
| 469.6254218                                                  | 1                                               | 1568.418835                           | 0.444534776                            |
| 442.9247423                                                  | 0.997680412                                     | 1434.857832                           | 0.513079967                            |
| 266.3784615                                                  | 1                                               | 892.3474675                           | 0.420021528                            |
| 148.2796888                                                  | 0.999310028                                     | 393.8443039                           | 0.401579718                            |
| 133.2786885                                                  | 1                                               | 398.438512                            | 0.474030869                            |
| 180.264969                                                   | 0.998967653                                     | 471.0517664                           | 0.351521594                            |
| 246.5866534                                                  | 1                                               | 791.2280478                           | 0.422599236                            |
| 284.4081395                                                  | 1                                               | 889.8749217                           | 0.371969512                            |
| 331.056                                                      | 1                                               | 1059.989235                           | 0.417563749                            |
| 183.7891566                                                  | 1                                               | 503.1261838                           | 0.424023205                            |
| 236.1842105                                                  | 0.99943609                                      | 683.7366626                           | 0.425594958                            |
| 139.9861111                                                  | 1                                               | 416.3520645                           | 0.448473428                            |
| 175.6936937                                                  | 1                                               | 491.4947083                           | 0.368254877                            |
| 293.0183486                                                  | 0.997706422                                     | 929.0101454                           | 0.450120831                            |
| 302.8539604                                                  | 1                                               | 928.1390389                           | 0.383093015                            |
| 232.040032                                                   | 1                                               | 675.8631111                           | 0.360262927                            |
| 196.8100638                                                  | 0.999468462                                     | 576.3600607                           | 0.391670261                            |
| 151.8346457                                                  | 1                                               | 425.2464705                           | 0.445377323                            |
| 239.0280612                                                  | 1                                               | 702.2559457                           | 0.419589827                            |
| 163.4329268                                                  | 1                                               | 487.0349977                           | 0.437976223                            |
| 225.7374702                                                  | 0.998210024                                     | 683.8123086                           | 0.402618482                            |
| 278.0188917                                                  | 1                                               | 886.7678917                           | 0.45098564                             |
| 280.8681102                                                  | 1                                               | 893.8144655                           | 0.40734622                             |
| 291.8932384                                                  | 0.998932384                                     | 879.6431886                           | 0.394480491                            |
| 290.8216561                                                  | 1                                               | 917.2613008                           | 0.473843566                            |
| 396.9640644                                                  | 1                                               | 1290.963668                           | 0.396919088                            |
| 375.957265                                                   | 0.997435897                                     | 1184.43551                            | 0.408070094                            |
| 290.8510233                                                  | 0.99250357                                      | 890.6073751                           | 0.412269919                            |
| 99.43930636                                                  | 1                                               | 273.9573531                           | 0.470688826                            |
| 285.6336842                                                  | 0.995263158                                     | 896.2180405                           | 0.452840429                            |
| 212.4797508                                                  | 1                                               | 664.8367574                           | 0.453335518                            |
| 314.7297896                                                  | 0.996677741                                     | 1015.740056                           | 0.404781342                            |
| 397.6399796                                                  | 1                                               | 1289.371045                           | 0.396695613                            |
| 187.5045208                                                  | 1                                               | 590.8992321                           | 0.486044458                            |
| 164.7238372                                                  | 1                                               | 484.5300398                           | 0.435727132                            |
| 269.957115                                                   | 0.998538012                                     | 808.3305609                           | 0.466746626                            |
| 227.4590164                                                  | 1                                               | 683.3930578                           | 0.447277083                            |
| 224.7372986                                                  | 1                                               | 654.7172894                           | 0.359471471                            |
| 175.2196007                                                  | 0.997958258                                     | 475.0349171                           | 0.372378253                            |
| 162                                                          | 1                                               | 480.9785452                           | 0.428636323                            |
| 206.3112245                                                  | 1                                               | 595.9623617                           | 0.457989764                            |
| 185.2380952                                                  | 1                                               | 576.0418158                           | 0.438347715                            |
| 191.2633833                                                  | 1                                               | 580.8815623                           | 0.433039748                            |
| 228.9131545                                                  | 1                                               | 654.2644455                           | 0.380540005                            |
| 479.770557                                                   | 1                                               | 1551.075573                           | 0.358984438                            |
| 187.8811321                                                  | 1                                               | 558.5454869                           | 0.424787292                            |
| 285.2361809                                                  | 0.999057789                                     | 906.7687238                           | 0.47055101                             |
| 139.4822006                                                  | 1                                               | 408.3457408                           | 0.459855478                            |
| 220.204918                                                   | 1                                               | 671.2289297                           | 0.41037336                             |
| 99.36723164                                                  | 1                                               | 347.0081783                           | 0.610850411                            |
| 217.9221477                                                  | 1                                               | 652.603691                            | 0.41040514                             |
| 213.6305556                                                  | 1                                               | 604.8744033                           | 0.443156865                            |
| 259.582716                                                   | 1                                               | 794.4478694                           | 0.441663595                            |
| 244.2328482                                                  | 1                                               | 796.4452397                           | 0.467765628                            |
| 265.1013216                                                  | 1                                               | 819.0913932                           | 0.535566293                            |
| 239.4247991                                                  | 0.999138921                                     | 696.9965447                           | 0.374528972                            |
| 195.7694284                                                  | 0.996628131                                     | 563.463397                            | 0.392934967                            |
| 199.9010727                                                  | 1                                               | 592.4545409                           | 0.456598064                            |
| 224.7116078                                                  | 0.999459265                                     | 661.5920135                           | 0.381540556                            |
| 531.7627856                                                  | 0.999183896                                     | 1745.194223                           | 0.443761278                            |
| 166.8490323                                                  | 1                                               | 478.438666                            | 0.424561218                            |
| 276.7973856                                                  | 1                                               | 876.021361                            | 0.422523046                            |
| 112.1213873                                                  | 1                                               | 325.08579                             | 0.488123111                            |
| 291.1341256                                                  | 1                                               | 929.2949695                           | 0.502244338                            |

| log.sigma.1.0.mm.3D_glc_m_Homogeneity2 | log.sigma.1.0.mm.3D_glc_m_ClusterShade | log.sigma.1.0.mm.3D_glc_m_MaximumProbability | log.sigma.1.0.mm.3D_glc_m_Ldmn | log.sigma.1.0.mm.3D_glc_m_SumVariance2 |
|----------------------------------------|----------------------------------------|----------------------------------------------|--------------------------------|----------------------------------------|
| 0.267031479                            | -73.48609255                           | 0.034631225                                  | 0.976137804                    | 26.50950614                            |
| 0.424955731                            | -5.868431878                           | 0.106628779                                  | 0.981852807                    | 9.878412488                            |
| 0.461917773                            | -3.626472338                           | 0.153368959                                  | 0.980684209                    | 9.106490444                            |
| 0.344007791                            | -74.75928416                           | 0.064139829                                  | 0.973731383                    | 19.02593796                            |
| 0.348692536                            | -42.56296448                           | 0.069297037                                  | 0.973790321                    | 15.46603087                            |
| 0.281663129                            | -12.74604708                           | 0.036795614                                  | 0.977621462                    | 24.4774659                             |
| 0.372166277                            | -7.022290709                           | 0.084959016                                  | 0.985358899                    | 12.79296584                            |
| 0.394223677                            | -20.36131938                           | 0.109540824                                  | 0.987187259                    | 14.5159991                             |
| 0.332753117                            | -39.27233396                           | 0.052149504                                  | 0.983660742                    | 16.46822777                            |
| 0.311891204                            | -49.98980537                           | 0.038654873                                  | 0.977117564                    | 18.30458551                            |
| 0.372227218                            | -18.89503552                           | 0.059839097                                  | 0.978177335                    | 10.37921354                            |
| 0.29729713                             | -86.72090303                           | 0.041428535                                  | 0.979135014                    | 22.31449537                            |
| 0.468772698                            | -22.16094979                           | 0.152580589                                  | 0.987768873                    | 12.05214732                            |
| 0.335923313                            | -58.38858945                           | 0.064839122                                  | 0.98037272                     | 19.77852207                            |
| 0.302819145                            | -64.33802473                           | 0.052762975                                  | 0.981928126                    | 21.35088738                            |
| 0.409504629                            | -29.71034211                           | 0.110980768                                  | 0.986437744                    | 12.98107522                            |
| 0.303948223                            | -5.834430235                           | 0.035304387                                  | 0.971929018                    | 16.30176797                            |
| 0.439954517                            | -15.59519098                           | 0.119511604                                  | 0.987476478                    | 10.07412475                            |
| 0.362156648                            | -5.847751955                           | 0.063404345                                  | 0.983523433                    | 10.53509491                            |
| 0.313160383                            | -38.99011986                           | 0.051026637                                  | 0.984183727                    | 18.9388911                             |
| 0.476423788                            | -0.587041704                           | 0.15222731                                   | 0.98701625                     | 7.161007417                            |
| 0.315957704                            | -24.69909428                           | 0.044401536                                  | 0.96636779                     | 13.93983856                            |
| 0.354554426                            | -21.69826915                           | 0.062765661                                  | 0.983914679                    | 13.26689404                            |
| 0.362855801                            | -11.13168042                           | 0.060529326                                  | 0.981033792                    | 13.24455544                            |
| 0.356069512                            | -25.47405667                           | 0.067100085                                  | 0.98088227                     | 15.94175771                            |
| 0.291314219                            | -9.731982036                           | 0.049661014                                  | 0.982249566                    | 21.87822276                            |
| 0.316690913                            | -23.80116683                           | 0.057908731                                  | 0.978570064                    | 20.4506602                             |
| 0.370739717                            | -44.0107108                            | 0.074835716                                  | 0.983363926                    | 14.51460524                            |
| 0.286312666                            | -16.42430089                           | 0.040720066                                  | 0.966498901                    | 14.99441401                            |
| 0.37513255                             | -34.47918218                           | 0.076088128                                  | 0.983155213                    | 12.24692652                            |
| 0.391713542                            | -35.49540141                           | 0.111118708                                  | 0.987323612                    | 14.697818173                           |
| 0.407818305                            | -39.07229065                           | 0.104008814                                  | 0.982659362                    | 11.97252325                            |
| 0.346827447                            | -8.131307076                           | 0.065710484                                  | 0.983890251                    | 19.089492875                           |
| 0.356495711                            | -56.68068017                           | 0.07885827                                   | 0.981319145                    | 19.43892542                            |
| 0.328188327                            | -24.02374525                           | 0.054717191                                  | 0.981443719                    | 19.12451612                            |
| 0.41088627                             | -10.96127332                           | 0.109568777                                  | 0.988789762                    | 12.26434185                            |
| 0.377323675                            | -52.04010725                           | 0.081069888                                  | 0.987841847                    | 16.89506126                            |
| 0.460196077                            | -25.2294716                            | 0.141961367                                  | 0.98933328                     | 12.74626029                            |
| 0.342504521                            | -48.77380618                           | 0.052829462                                  | 0.979970596                    | 13.19369471                            |
| 0.321184673                            | -10.10862864                           | 0.038840824                                  | 0.975760459                    | 15.37459507                            |
| 0.409892634                            | -19.97456186                           | 0.10805611                                   | 0.979650831                    | 11.03808999                            |
| 0.26282491                             | -1.970216269                           | 0.021888908                                  | 0.971030613                    | 21.39250776                            |
| 0.347154555                            | -36.74420066                           | 0.063873479                                  | 0.982644205                    | 15.07059811                            |
| 0.290130053                            | -75.69579493                           | 0.038527821                                  | 0.973464579                    | 23.37463807                            |
| 0.341732984                            | -49.33818537                           | 0.049744875                                  | 0.982838892                    | 17.40852347                            |
| 0.349680674                            | -1.327759614                           | 0.058948512                                  | 0.983945829                    | 15.22404509                            |
| 0.352432792                            | -6.352338776                           | 0.075795204                                  | 0.982552181                    | 16.56076524                            |
| 0.378613595                            | -23.69907177                           | 0.077304545                                  | 0.97984089                     | 10.76685607                            |
| 0.285059197                            | -54.35346676                           | 0.044829836                                  | 0.971314679                    | 23.47575284                            |
| 0.379109203                            | -18.85696126                           | 0.087518433                                  | 0.984137325                    | 12.66636172                            |
| 0.301056443                            | -39.18170963                           | 0.04599792                                   | 0.98292781                     | 20.68149282                            |
| 0.272975829                            | -14.5177273                            | 0.027003521                                  | 0.977143129                    | 21.05311521                            |
| 0.309009487                            | -22.45955839                           | 0.043335647                                  | 0.977989756                    | 15.80106543                            |
| 0.374076255                            | -2.911298745                           | 0.063527063                                  | 0.982309264                    | 11.15286006                            |
| 0.344923373                            | -0.476908642                           | 0.065616086                                  | 0.979968173                    | 17.53345792                            |
| 0.364915042                            | -34.69858591                           | 0.066324085                                  | 0.980467905                    | 12.37435618                            |
| 0.323536878                            | -31.81257295                           | 0.049859542                                  | 0.981595749                    | 16.7791305                             |
| 0.382550362                            | -32.38925744                           | 0.082918492                                  | 0.985094036                    | 13.45848489                            |
| 0.329454685                            | -39.91560977                           | 0.059839006                                  | 0.982747117                    | 15.95128069                            |
| 0.31620433                             | -28.12324271                           | 0.045043449                                  | 0.978841015                    | 20.005756                              |
| 0.411186646                            | -13.0291908                            | 0.127076621                                  | 0.98617314                     | 13.97689506                            |
| 0.319071471                            | -55.41606279                           | 0.058510058                                  | 0.98488195                     | 19.77579461                            |
| 0.33171146                             | -26.52486708                           | 0.07001625                                   | 0.983397106                    | 17.84955155                            |
| 0.335773617                            | -33.72778353                           | 0.064087317                                  | 0.9849712                      | 17.07362013                            |
| 0.40313148                             | -11.3213093                            | 0.073520897                                  | 0.97561155                     | 7.512882696                            |
| 0.385771082                            | -36.51606716                           | 0.092979822                                  | 0.986761866                    | 14.05651943                            |
| 0.386101306                            | -39.34586072                           | 0.100118809                                  | 0.980414192                    | 13.09513681                            |
| 0.327766143                            | -36.34286105                           | 0.062288533                                  | 0.983964676                    | 17.3458274                             |
| 0.316705778                            | -39.53049565                           | 0.049486149                                  | 0.987828871                    | 17.6586208                             |
| 0.423071171                            | -17.45673128                           | 0.098042787                                  | 0.983101109                    | 8.862676225                            |
| 0.363994234                            | -30.7095379                            | 0.078421042                                  | 0.977819506                    | 13.85133084                            |
| 0.402511697                            | -18.66315523                           | 0.108988765                                  | 0.985791501                    | 15.02821537                            |
| 0.379535581                            | -19.8870692                            | 0.07863411                                   | 0.981058231                    | 15.92106595                            |
| 0.27501556                             | -47.28531033                           | 0.032795371                                  | 0.976165493                    | 24.3629398                             |
| 0.287203518                            | -18.40618553                           | 0.033408564                                  | 0.974255807                    | 18.61598533                            |
| 0.354304436                            | -37.74564286                           | 0.05946073                                   | 0.97963241                     | 13.53090724                            |
| 0.389434273                            | -10.02113502                           | 0.07236179                                   | 0.987195026                    | 11.36606695                            |
| 0.367325782                            | -41.95120908                           | 0.076741874                                  | 0.976243447                    | 13.22326228                            |
| 0.357594542                            | -23.50138402                           | 0.061777476                                  | 0.979360158                    | 11.82087474                            |
| 0.299210015                            | -38.74343037                           | 0.043337036                                  | 0.977610129                    | 21.16242297                            |
| 0.277183975                            | -68.35697946                           | 0.036838902                                  | 0.977412456                    | 25.38139649                            |
| 0.353600465                            | -46.30185856                           | 0.06060774                                   | 0.9783241                      | 17.57122458                            |
| 0.407122171                            | -22.32968448                           | 0.103631299                                  | 0.985696738                    | 13.52705867                            |
| 0.389737191                            | -10.10993921                           | 0.073124417                                  | 0.978042973                    | 8.450658968                            |
| 0.335544127                            | -39.26020337                           | 0.057707616                                  | 0.976519448                    | 18.13742617                            |
| 0.575640074                            | -9.394226949                           | 0.235169384                                  | 0.987689985                    | 4.01144131                             |
| 0.335623752                            | -44.75701935                           | 0.058999371                                  | 0.977765874                    | 18.665881                              |
| 0.372665419                            | -19.01906558                           | 0.079587086                                  | 0.979923322                    | 14.95682776                            |
| 0.370556909                            | -45.9018064                            | 0.08444005                                   | 0.981212988                    | 13.88211312                            |
| 0.402382319                            | -37.64626858                           | 0.103046846                                  | 0.983972803                    | 11.77583088                            |
| 0.482901793                            | -4.41081333                            | 0.159450736                                  | 0.990979207                    | 7.217127229                            |
| 0.288865448                            | -19.32688778                           | 0.03306127                                   | 0.975317239                    | 18.10490592                            |
| 0.312598598                            | -31.58758767                           | 0.042052507                                  | 0.978697263                    | 18.01303803                            |
| 0.388586394                            | -24.90975449                           | 0.084295277                                  | 0.983026683                    | 12.47245433                            |
| 0.297206307                            | -20.80630152                           | 0.032582946                                  | 0.981560878                    | 17.12167439                            |
| 0.377513019                            | -77.77112027                           | 0.10838005                                   | 0.986261988                    | 21.51433884                            |
| 0.349188741                            | -20.56519611                           | 0.058240444                                  | 0.978155159                    | 13.79557132                            |
| 0.349400512                            | -56.71601505                           | 0.085628544                                  | 0.97579258                     | 18.45308895                            |
| 0.425352049                            | -16.83291349                           | 0.12494047                                   | 0.975753365                    | 8.115192466                            |
| 0.444313018                            | 0.402493125                            | 0.1322272684                                 | 0.989249581                    | 9.959465298                            |

| log.sigma.1.0.mm.3D_glc_m_Contrast | log.sigma.1.0.mm.3D_glc_m_DifferenceEntropy | log.sigma.1.0.mm.3D_glc_m_InverseVariance | log.sigma.1.0.mm.3D_glc_m_Entropy | log.sigma.1.0.mm.3D_glc_m_Dissimilarity |
|------------------------------------|---------------------------------------------|-------------------------------------------|-----------------------------------|-----------------------------------------|
| 28.81362215                        | 3.495441921                                 | 0.270631443                               | 7.457360461                       | 3.888669896                             |
| 8.88598176                         | 2.681645247                                 | 0.392313481                               | 5.67092146                        | 2.042817454                             |
| 7.773497719                        | 2.610793973                                 | 0.383646941                               | 5.563294376                       | 1.875915533                             |
| 17.37764828                        | 3.111638198                                 | 0.326702042                               | 6.625293735                       | 2.884110805                             |
| 14.33205383                        | 3.08353703                                  | 0.331671762                               | 6.541264163                       | 2.701140138                             |
| 20.81503023                        | 3.247776454                                 | 0.28827394                                | 6.84643233                        | 3.332581921                             |
| 11.45686966                        | 2.903183946                                 | 0.346121252                               | 6.385007804                       | 2.419012161                             |
| 13.30005282                        | 2.937278882                                 | 0.359271127                               | 6.251150133                       | 2.456392386                             |
| 15.91743676                        | 3.101161502                                 | 0.324612868                               | 6.76276948                        | 2.84863493                              |
| 17.26666113                        | 3.131103008                                 | 0.314545354                               | 6.731685511                       | 2.992442718                             |
| 9.646283585                        | 2.777901561                                 | 0.365627043                               | 6.095209616                       | 2.262999135                             |
| 22.33476484                        | 3.293833644                                 | 0.296493143                               | 7.004868581                       | 3.336051524                             |
| 10.71407141                        | 2.664559356                                 | 0.402888159                               | 5.468291174                       | 2.004273479                             |
| 18.47426435                        | 3.15170923                                  | 0.319827021                               | 6.746408298                       | 2.959985166                             |
| 24.25757525                        | 3.326846225                                 | 0.306079863                               | 6.950780493                       | 3.42680918                              |
| 11.66449311                        | 2.829943003                                 | 0.371952926                               | 6.101028332                       | 2.268331947                             |
| 15.22475814                        | 3.089646669                                 | 0.298913888                               | 6.804419402                       | 2.916094701                             |
| 8.546126996                        | 2.625861254                                 | 0.401790618                               | 5.595435496                       | 1.950410514                             |
| 10.21368487                        | 2.824929264                                 | 0.354101834                               | 6.146749462                       | 2.348586755                             |
| 17.5770522                         | 3.159933072                                 | 0.310118628                               | 6.891078767                       | 3.001916905                             |
| 6.173240664                        | 2.477505523                                 | 0.410861497                               | 5.360778636                       | 1.691330347                             |
| 13.82055864                        | 3.025689438                                 | 0.322131956                               | 6.572432657                       | 2.787793599                             |
| 12.78856199                        | 2.934507407                                 | 0.347958853                               | 6.310435416                       | 2.541063389                             |
| 12.05397443                        | 2.915462449                                 | 0.34765187                                | 6.421222164                       | 2.470877974                             |
| 14.49753818                        | 2.985449088                                 | 0.34599768                                | 6.388011081                       | 2.634780879                             |
| 21.03046232                        | 3.272780288                                 | 0.300550244                               | 7.056372354                       | 3.308683683                             |
| 18.68253471                        | 3.194192601                                 | 0.311223355                               | 7.016733856                       | 3.069055322                             |
| 13.44381185                        | 2.940651193                                 | 0.354435102                               | 6.347496999                       | 2.511377735                             |
| 15.00148875                        | 3.076472361                                 | 0.288353276                               | 6.593669669                       | 2.991849371                             |
| 11.59624993                        | 2.862271261                                 | 0.364112016                               | 6.137117599                       | 2.379029324                             |
| 14.14288724                        | 2.955230004                                 | 0.356084874                               | 6.285525463                       | 2.494441675                             |
| 12.09468883                        | 2.844984307                                 | 0.376971108                               | 6.018403765                       | 2.312662539                             |
| 16.89213025                        | 3.115258231                                 | 0.327507383                               | 6.805142773                       | 2.853070748                             |
| 17.59690542                        | 3.095780918                                 | 0.343321746                               | 6.67176839                        | 2.826961059                             |
| 17.08805865                        | 3.142870877                                 | 0.320989988                               | 6.878758414                       | 2.936827856                             |
| 10.90861817                        | 2.792661212                                 | 0.379241362                               | 6.011812758                       | 2.12224211                              |
| 18.39081067                        | 3.03557238                                  | 0.3591865                                 | 6.415696804                       | 2.725704798                             |
| 12.6916662                         | 2.786028538                                 | 0.382950036                               | 5.785475629                       | 2.183496171                             |
| 14.10737596                        | 2.979334632                                 | 0.332919781                               | 6.312602305                       | 2.639940057                             |
| 14.14594549                        | 3.056071312                                 | 0.317622349                               | 6.851822782                       | 2.791326939                             |
| 9.986922711                        | 2.775554606                                 | 0.376801858                               | 6.019659133                       | 2.183501765                             |
| 20.02228555                        | 3.292486079                                 | 0.268519131                               | 7.367847484                       | 3.426940002                             |
| 13.79912744                        | 3.003402441                                 | 0.336836168                               | 6.570773624                       | 2.646419919                             |
| 23.6972202                         | 3.346819043                                 | 0.291004035                               | 7.191717331                       | 3.459233047                             |
| 16.06218177                        | 3.040042309                                 | 0.335799604                               | 6.463803039                       | 2.763339867                             |
| 13.69430314                        | 2.985795369                                 | 0.346242413                               | 6.558744992                       | 2.622704284                             |
| 15.01868085                        | 3.04197984                                  | 0.340836067                               | 6.611445735                       | 2.705546611                             |
| 10.83007648                        | 2.816530081                                 | 0.371910841                               | 5.914159252                       | 2.321503079                             |
| 22.04838702                        | 3.30047185                                  | 0.288856256                               | 6.985303221                       | 3.410565528                             |
| 10.78922494                        | 2.839998915                                 | 0.355856611                               | 6.155850119                       | 2.329155426                             |
| 19.00376744                        | 3.214293298                                 | 0.302498204                               | 6.977753595                       | 3.145936508                             |
| 19.58342109                        | 3.269887716                                 | 0.276102813                               | 7.245857261                       | 3.337830696                             |
| 15.03916676                        | 3.093222488                                 | 0.308367406                               | 6.820336827                       | 2.89053099                              |
| 10.23133169                        | 2.796896373                                 | 0.371015581                               | 6.089752123                       | 2.292929958                             |
| 14.97804537                        | 3.038970539                                 | 0.337060153                               | 6.490328668                       | 2.734893934                             |
| 11.42688813                        | 2.86894097                                  | 0.357675324                               | 6.228673841                       | 2.407292971                             |
| 15.68566251                        | 3.1051238                                   | 0.316996876                               | 6.833862542                       | 2.874366782                             |
| 12.7920473                         | 2.909574287                                 | 0.362428481                               | 6.316718954                       | 2.43761352                              |
| 15.83435744                        | 3.077947608                                 | 0.326092029                               | 6.571634334                       | 2.834644985                             |
| 19.60089515                        | 3.256072597                                 | 0.299398315                               | 7.157156324                       | 3.171055139                             |
| 12.75501866                        | 2.869423302                                 | 0.369820469                               | 6.008228438                       | 2.346712732                             |
| 21.47859159                        | 3.25110371                                  | 0.306579805                               | 6.886925815                       | 3.189198112                             |
| 17.35359294                        | 3.153301487                                 | 0.319206619                               | 6.806088988                       | 2.944085265                             |
| 16.74487284                        | 3.118073326                                 | 0.322256289                               | 6.755983648                       | 2.866989278                             |
| 6.848229696                        | 2.566527595                                 | 0.396200712                               | 5.630941245                       | 1.943701389                             |
| 13.92737709                        | 2.935729069                                 | 0.364380079                               | 6.284253483                       | 2.486089342                             |
| 13.89346085                        | 2.93166537                                  | 0.360923298                               | 6.123301215                       | 2.490336939                             |
| 17.77998606                        | 3.169342487                                 | 0.316360432                               | 6.85475929                        | 2.984570677                             |
| 17.71960045                        | 3.171929336                                 | 0.307915776                               | 6.884736199                       | 3.009466916                             |
| 8.267087706                        | 2.643329785                                 | 0.393773999                               | 5.742924916                       | 1.982503388                             |
| 13.07952573                        | 2.950734594                                 | 0.349337997                               | 6.309215889                       | 2.50610672                              |
| 13.21289891                        | 2.888902497                                 | 0.370087364                               | 6.171308925                       | 2.385324474                             |
| 14.21766127                        | 2.985696808                                 | 0.352974413                               | 6.465500312                       | 2.573093582                             |
| 23.68953486                        | 3.374846128                                 | 0.276267767                               | 7.356602009                       | 3.566837664                             |
| 17.77620942                        | 3.204270387                                 | 0.290473807                               | 7.094969733                       | 3.165479107                             |
| 12.91744717                        | 2.954481815                                 | 0.341757921                               | 6.359031536                       | 2.571118467                             |
| 9.968716459                        | 2.787657531                                 | 0.372102809                               | 6.042106533                       | 2.23430141                              |
| 13.2322728                         | 2.90938131                                  | 0.362758613                               | 6.140159662                       | 2.502820286                             |
| 11.05592289                        | 2.865034821                                 | 0.348309765                               | 6.234532395                       | 2.410273948                             |
| 20.89895126                        | 3.277456537                                 | 0.295366594                               | 7.131334307                       | 3.282839969                             |
| 27.2598788                         | 3.447752811                                 | 0.279121369                               | 7.344579942                       | 3.74786222                              |
| 17.72121088                        | 3.11762515                                  | 0.335974415                               | 6.606120604                       | 2.880232152                             |
| 13.28497736                        | 2.894865318                                 | 0.366457069                               | 6.162749016                       | 2.386544392                             |
| 7.838190725                        | 2.658448183                                 | 0.381596978                               | 5.945110101                       | 2.064917892                             |
| 17.76525953                        | 3.150173996                                 | 0.324870745                               | 6.810793697                       | 2.961399144                             |
| 3.503027501                        | 2.072320379                                 | 0.444842807                               | 4.369629136                       | 1.190208497                             |
| 18.13564215                        | 3.159740158                                 | 0.324869017                               | 6.852303436                       | 2.973226346                             |
| 12.88111034                        | 2.942245261                                 | 0.351735022                               | 6.417903445                       | 2.497836373                             |
| 13.13714584                        | 2.92618022                                  | 0.354709106                               | 6.229125329                       | 2.494595052                             |
| 11.12948538                        | 2.81023041                                  | 0.374594767                               | 6.006751967                       | 2.256195698                             |
| 5.514801839                        | 2.403184335                                 | 0.416307492                               | 5.122085279                       | 1.608074636                             |
| 16.95996852                        | 3.17423449                                  | 0.290537097                               | 7.021738646                       | 3.103489751                             |
| 17.12300057                        | 3.155947988                                 | 0.312883543                               | 6.951690176                       | 2.997953533                             |
| 10.70840203                        | 2.821791283                                 | 0.372089307                               | 6.192502529                       | 2.287627344                             |
| 16.76694266                        | 3.163457948                                 | 0.295863295                               | 7.002449607                       | 3.046020493                             |
| 20.70668759                        | 3.157591653                                 | 0.334694565                               | 6.588584469                       | 2.926837186                             |
| 12.76225999                        | 2.965932863                                 | 0.340194029                               | 6.513861245                       | 2.580894152                             |
| 18.89965784                        | 3.13584999                                  | 0.325162057                               | 6.55688187                        | 2.928119088                             |
| 7.851984437                        | 2.640861409                                 | 0.385379681                               | 5.627426098                       | 1.980135067                             |
| 8.422385769                        | 2.640490107                                 | 0.399747532                               | 5.670454514                       | 1.943959316                             |



| log.sigma.1.0.mm.3D_glcm_DifferenceVariance | log.sigma.1.0.mm.3D_glcm_ldn | log.sigma.1.0.mm.3D_glcm_ldm | log.sigma.1.0.mm.3D_glcm_Correlation | log.sigma.1.0.mm.3D_glcm_Autocorrelation |
|---------------------------------------------|------------------------------|------------------------------|--------------------------------------|------------------------------------------|
| 13.65881414                                 | 0.902604428                  | 0.267031479                  | -0.037064605                         | 467.5885244                              |
| 4.703904515                                 | 0.918367454                  | 0.424955731                  | 0.049451398                          | 143.2398977                              |
| 4.235844939                                 | 0.917872217                  | 0.461917773                  | 0.077192123                          | 118.7097065                              |
| 9.029913294                                 | 0.902326423                  | 0.344007791                  | 0.045446735                          | 245.0120575                              |
| 7.016449427                                 | 0.899666734                  | 0.348692536                  | 0.038499727                          | 189.0042934                              |
| 5.9931999                                   | 0.904306906                  | 0.281663129                  | 0.079965841                          | 254.3878436                              |
| 5.595153878                                 | 0.923121134                  | 0.372166277                  | 0.055257676                          | 221.4610686                              |
| 7.257781424                                 | 0.931872758                  | 0.394223677                  | 0.044415516                          | 286.8710666                              |
| 7.79029313                                  | 0.919176587                  | 0.332753117                  | 0.017236593                          | 286.8405013                              |
| 8.261950574                                 | 0.904563681                  | 0.311891204                  | 0.029441626                          | 255.9014778                              |
| 4.515535771                                 | 0.905633843                  | 0.372227218                  | 0.035063492                          | 140.4309185                              |
| 11.17965953                                 | 0.91031596                   | 0.29729713                   | 0.002173912                          | 327.2041277                              |
| 6.676786634                                 | 0.938997072                  | 0.468772698                  | 0.059294515                          | 280.9853474                              |
| 9.69410061                                  | 0.914820813                  | 0.335923313                  | 0.034578894                          | 318.9738042                              |
| 12.47497435                                 | 0.917620987                  | 0.302819145                  | -0.056371129                         | 353.1996553                              |
| 6.511273509                                 | 0.930732336                  | 0.409504629                  | 0.053480109                          | 248.1355223                              |
| 6.69611476                                  | 0.891502081                  | 0.303948223                  | 0.031947284                          | 117.0525405                              |
| 4.73265712                                  | 0.93285997                   | 0.439954517                  | 0.079223559                          | 222.0745029                              |
| 4.679885329                                 | 0.916436277                  | 0.362156648                  | 0.016084744                          | 219.2120796                              |
| 8.549525745                                 | 0.919894447                  | 0.313160383                  | 0.038439904                          | 287.1797539                              |
| 3.308290676                                 | 0.9307409                    | 0.476423788                  | 0.070089589                          | 163.8284184                              |
| 6.022102194                                 | 0.88199721                   | 0.315957704                  | 0.005433542                          | 141.3068282                              |
| 6.321221585                                 | 0.919826612                  | 0.354554426                  | 0.01675717                           | 283.3900078                              |
| 5.931057585                                 | 0.91342019                   | 0.362855801                  | 0.04832778                           | 223.79807                                |
| 7.524860665                                 | 0.915164774                  | 0.356069512                  | 0.045239241                          | 258.9633847                              |
| 10.04819885                                 | 0.915061009                  | 0.291314219                  | 0.021927358                          | 364.178741                               |
| 9.240516434                                 | 0.908802001                  | 0.316690913                  | 0.045295113                          | 255.0235433                              |
| 7.126149358                                 | 0.921360789                  | 0.370739717                  | 0.037689271                          | 282.1862217                              |
| 6.040304536                                 | 0.878992198                  | 0.286312666                  | -0.001014192                         | 140.6818848                              |
| 5.930791718                                 | 0.919405085                  | 0.37513255                   | 0.026038974                          | 251.2404329                              |
| 7.911811984                                 | 0.933039437                  | 0.391713542                  | 0.020408184                          | 321.9661595                              |
| 6.735214935                                 | 0.92242013                   | 0.407183005                  | -0.003436778                         | 243.6293468                              |
| 8.721276667                                 | 0.921882248                  | 0.346827447                  | 0.061264533                          | 251.1700684                              |
| 9.590372334                                 | 0.918584538                  | 0.356495711                  | 0.049567378                          | 220.7023396                              |
| 8.451465276                                 | 0.914715994                  | 0.328188327                  | 0.055304624                          | 198.2482356                              |
| 6.002556513                                 | 0.936026099                  | 0.41088627                   | 0.058697843                          | 220.7280577                              |
| 10.94710667                                 | 0.936852331                  | 0.377323675                  | -0.040860193                         | 467.0740536                              |
| 7.905456578                                 | 0.943070745                  | 0.460196077                  | 0.006300554                          | 426.2898466                              |
| 7.132374502                                 | 0.911713214                  | 0.342504521                  | -0.033183422                         | 279.1088062                              |
| 6.346330022                                 | 0.899443203                  | 0.321184673                  | 0.041487302                          | 137.731147                               |
| 5.206033566                                 | 0.913502334                  | 0.409892634                  | 0.05005765                           | 136.2347479                              |
| 8.259968431                                 | 0.88768831                   | 0.26282491                   | 0.033147155                          | 162.2378808                              |
| 6.779962631                                 | 0.916974349                  | 0.347154555                  | 0.044187333                          | 252.6014817                              |
| 11.71455052                                 | 0.899188255                  | 0.290130053                  | -0.006405337                         | 282.9039038                              |
| 8.392120353                                 | 0.919545065                  | 0.341732984                  | 0.041926218                          | 328.5037531                              |
| 6.796590372                                 | 0.920227776                  | 0.349680674                  | 0.050610936                          | 169.2476412                              |
| 7.687020305                                 | 0.91842071                   | 0.352432792                  | 0.047796238                          | 221.9795311                              |
| 5.427002344                                 | 0.911819968                  | 0.378613595                  | -0.002047195                         | 140.9826636                              |
| 10.38116881                                 | 0.893377435                  | 0.285059197                  | 0.031513886                          | 167.1253835                              |
| 5.347291985                                 | 0.920587389                  | 0.379109203                  | 0.077100641                          | 290.0441146                              |
| 9.099145125                                 | 0.916454298                  | 0.301056443                  | 0.043655867                          | 293.8220105                              |
| 8.410858066                                 | 0.900454418                  | 0.272975829                  | 0.036749349                          | 222.2971723                              |
| 6.671178177                                 | 0.903317237                  | 0.309009487                  | 0.024875039                          | 191.4921379                              |
| 4.965907797                                 | 0.915596058                  | 0.374076255                  | 0.043380346                          | 144.5407051                              |
| 7.478234782                                 | 0.912043031                  | 0.344923373                  | 0.074288402                          | 227.4696713                              |
| 5.620173803                                 | 0.912173226                  | 0.364915042                  | 0.040054106                          | 163.175775                               |
| 7.408551418                                 | 0.913229558                  | 0.323536878                  | 0.034066344                          | 222.8540467                              |
| 6.842366208                                 | 0.925832165                  | 0.382550362                  | 0.025575376                          | 277.7821626                              |
| 7.787458515                                 | 0.917153136                  | 0.329454685                  | 0.005007521                          | 281.5079049                              |
| 9.538680462                                 | 0.908833391                  | 0.31620433                   | 0.010566345                          | 280.0088549                              |
| 7.234782263                                 | 0.931028472                  | 0.411186646                  | 0.045527802                          | 285.4899129                              |
| 11.27007724                                 | 0.924499251                  | 0.319071471                  | -0.035787526                         | 394.092171                               |
| 8.669806545                                 | 0.919376982                  | 0.33171146                   | 0.017908284                          | 364.3371561                              |
| 8.506788716                                 | 0.923434149                  | 0.335773617                  | 0.010636124                          | 281.3909583                              |
| 3.060259429                                 | 0.8993431                    | 0.40313148                   | 0.044956278                          | 97.57270912                              |
| 7.73102281                                  | 0.931274355                  | 0.385771082                  | 0.005410632                          | 280.3733703                              |
| 7.675394173                                 | 0.917248152                  | 0.386101306                  | -0.028194743                         | 213.5201474                              |
| 8.859834212                                 | 0.920594538                  | 0.327766143                  | -0.01049048                          | 316.8599092                              |
| 8.653126138                                 | 0.929283651                  | 0.316705778                  | 0.001608642                          | 393.9709515                              |
| 4.333998421                                 | 0.920214253                  | 0.423071171                  | 0.03363941                           | 190.817407                               |
| 6.530517539                                 | 0.908133242                  | 0.363994234                  | 0.030374562                          | 162.7436835                              |
| 7.512839049                                 | 0.930028936                  | 0.402511697                  | 0.064192356                          | 255.8260288                              |
| 7.576867026                                 | 0.917318548                  | 0.379535581                  | 0.055936951                          | 221.2541412                              |
| 10.94756686                                 | 0.901528891                  | 0.27501556                   | 0.014024729                          | 216.1375787                              |
| 7.728168182                                 | 0.895450452                  | 0.287203518                  | 0.022698223                          | 162.5061763                              |
| 6.271723535                                 | 0.910387775                  | 0.354304436                  | 0.023959289                          | 161.5477813                              |
| 4.972808186                                 | 0.928395475                  | 0.389434273                  | 0.064267539                          | 194.0932603                              |
| 6.944903394                                 | 0.906670167                  | 0.367325782                  | 0.001195681                          | 188.5926162                              |
| 5.236773925                                 | 0.908251591                  | 0.357594542                  | 0.034035591                          | 190.4796208                              |
| 10.09513302                                 | 0.906015164                  | 0.299210015                  | 0.005987794                          | 215.2668775                              |
| 13.17813977                                 | 0.905802058                  | 0.277183975                  | -0.031101359                         | 469.1409069                              |
| 9.398680911                                 | 0.911890547                  | 0.353600465                  | -0.003292118                         | 185.3712579                              |
| 7.568240355                                 | 0.930063547                  | 0.407121271                  | 0.011152823                          | 282.7005629                              |
| 3.558027377                                 | 0.904211837                  | 0.389737191                  | 0.038117807                          | 138.6604165                              |
| 8.950218027                                 | 0.906197946                  | 0.335544127                  | 0.011181957                          | 218.9490716                              |
| 2.07131475                                  | 0.936337029                  | 0.575640074                  | 0.068976264                          | 114.4899866                              |
| 9.267204775                                 | 0.908942776                  | 0.335623752                  | 0.014516798                          | 213.6618021                              |
| 6.631284649                                 | 0.913195908                  | 0.372666519                  | 0.073210194                          | 198.7186867                              |
| 6.904808533                                 | 0.916414502                  | 0.370556909                  | 0.026747391                          | 251.8433961                              |
| 6.01223156                                  | 0.923619208                  | 0.402382319                  | 0.029687617                          | 250.9637667                              |
| 2.91876977                                  | 0.940945298                  | 0.482901793                  | 0.131961897                          | 252.526213                               |
| 7.316075849                                 | 0.897046488                  | 0.288865448                  | 0.032815809                          | 227.5703383                              |
| 8.130310479                                 | 0.907284228                  | 0.312598598                  | 0.025223242                          | 188.1973627                              |
| 5.463696914                                 | 0.919334819                  | 0.388586394                  | 0.074993688                          | 194.1339415                              |
| 7.48016106                                  | 0.910913023                  | 0.297206307                  | 0.010616058                          | 216.81445                                |
| 12.11453278                                 | 0.932752507                  | 0.377513019                  | 0.020608306                          | 519.0915905                              |
| 6.093971744                                 | 0.906557857                  | 0.349188741                  | 0.039037263                          | 161.7474502                              |
| 10.28162603                                 | 0.908148676                  | 0.349400512                  | -0.010324747                         | 276.1821199                              |
| 3.915442453                                 | 0.904297525                  | 0.425352049                  | 0.017008396                          | 112.7902661                              |
| 4.635465514                                 | 0.937378014                  | 0.444313018                  | 0.081572621                          | 286.4962044                              |

| log.sigma.1.0.mm.3D_glcM_SumEntropy | log.sigma.1.0.mm.3D_glcM_AverageIntensity | log.sigma.1.0.mm.3D_glcM_Energy | log.sigma.1.0.mm.3D_glcM_SumSquares | log.sigma.1.0.mm.3D_glcM_ClusterProminence |
|-------------------------------------|-------------------------------------------|---------------------------------|-------------------------------------|--------------------------------------------|
| 4.319805964                         | 21.86887591                               | 0.01041287                      | 13.06218819                         | 3058.7982                                  |
| 3.512199664                         | 11.95775534                               | 0.038177591                     | 4.691098562                         | 616.2807245                                |
| 3.462704926                         | 10.88001674                               | 0.050445601                     | 4.219997041                         | 459.7505209                                |
| 4.017453287                         | 15.6396201                                | 0.019170935                     | 9.10089656                          | 1936.661542                                |
| 3.911879455                         | 13.73747124                               | 0.021002944                     | 7.449521176                         | 1199.787139                                |
| 4.187823916                         | 15.94990705                               | 0.013683927                     | 11.56713625                         | 3179.208093                                |
| 3.798632332                         | 14.87247543                               | 0.024369154                     | 6.084675588                         | 848.0859645                                |
| 3.810776696                         | 16.97922452                               | 0.032124263                     | 7.137505318                         | 1290.399742                                |
| 3.981484566                         | 16.98186945                               | 0.017251455                     | 8.286099186                         | 1349.306877                                |
| 4.032804041                         | 15.99347406                               | 0.01545224                      | 8.926228543                         | 1605.989667                                |
| 3.652026172                         | 11.84255141                               | 0.023651878                     | 5.006374281                         | 518.6536439                                |
| 4.160652456                         | 18.22871437                               | 0.013976844                     | 11.32896202                         | 2706.640016                                |
| 3.474483108                         | 16.77555828                               | 0.056305433                     | 5.85707371                          | 1372.53904                                 |
| 4.041344408                         | 17.91076088                               | 0.018866955                     | 9.746866575                         | 2492.233263                                |
| 4.099043521                         | 19.07176265                               | 0.01673528                      | 10.75726648                         | 2609.905339                                |
| 3.721381634                         | 15.74932258                               | 0.033831312                     | 6.222401746                         | 1129.649241                                |
| 4.00852926                          | 10.80659076                               | 0.013486824                     | 7.88131513                          | 1033.501291                                |
| 3.50234144                          | 14.88925847                               | 0.041796869                     | 4.655062936                         | 733.1481039                                |
| 3.669091685                         | 14.80306509                               | 0.023928212                     | 5.187194945                         | 518.7974342                                |
| 4.077654609                         | 17.0166707                                | 0.015902477                     | 9.312308002                         | 1941.463753                                |
| 3.30540978                          | 12.78984491                               | 0.053748897                     | 3.33356202                          | 321.6742598                                |
| 3.876059989                         | 11.88587594                               | 0.016408096                     | 6.9400993                           | 820.6296532                                |
| 3.798643367                         | 16.83602444                               | 0.022001969                     | 6.549754807                         | 1023.568114                                |
| 3.82659649                          | 14.94984603                               | 0.021470959                     | 6.324632466                         | 888.121734                                 |
| 3.891973051                         | 16.08727338                               | 0.023001687                     | 7.656010171                         | 1554.829744                                |
| 4.161145479                         | 19.3163594                                | 0.014380809                     | 10.52143185                         | 2561.534099                                |
| 4.134191877                         | 15.9816678                                | 0.015417863                     | 9.962226117                         | 1994.258718                                |
| 3.82270516                          | 16.80022652                               | 0.024569115                     | 7.057008006                         | 1391.774837                                |
| 3.927002935                         | 11.86095807                               | 0.014553899                     | 7.48997569                          | 817.7245874                                |
| 3.714578604                         | 15.84541233                               | 0.026721854                     | 5.960794112                         | 982.9207835                                |
| 3.801717056                         | 18.03785006                               | 0.031262336                     | 7.330105574                         | 1510.368501                                |
| 3.650415695                         | 15.60960095                               | 0.033857366                     | 6.016805396                         | 930.2192862                                |
| 4.070508304                         | 15.89178767                               | 0.018789132                     | 9.332120648                         | 1950.162601                                |
| 4.030352522                         | 14.85478146                               | 0.021983064                     | 9.354497997                         | 2216.980623                                |
| 4.091950896                         | 14.07080004                               | 0.01673412                      | 9.130931627                         | 1760.239725                                |
| 3.674638751                         | 14.85630382                               | 0.034977602                     | 5.871839724                         | 993.7648765                                |
| 3.851745187                         | 21.7276534                                | 0.026980047                     | 8.188044614                         | 2221.338399                                |
| 3.582090076                         | 20.7771665                                | 0.052490628                     | 5.99002623                          | 1318.986158                                |
| 3.776263781                         | 16.71337476                               | 0.020948078                     | 6.825267668                         | 1090.047664                                |
| 3.991336428                         | 11.7227872                                | 0.014360454                     | 7.380135138                         | 915.4035295                                |
| 3.638964136                         | 11.66068478                               | 0.033785829                     | 5.256253176                         | 655.665908                                 |
| 4.242490313                         | 12.72380242                               | 0.008694427                     | 10.35369833                         | 1485.593848                                |
| 3.907257382                         | 15.88631784                               | 0.019605833                     | 7.239813462                         | 1218.280934                                |
| 4.207983028                         | 16.87047546                               | 0.012660708                     | 12.05134025                         | 2795.958973                                |
| 3.941801744                         | 18.15396815                               | 0.019791232                     | 8.486593292                         | 1892.583009                                |
| 3.900931067                         | 12.99725861                               | 0.020738186                     | 7.257412298                         | 1226.578458                                |
| 3.942282093                         | 14.89853409                               | 0.022031659                     | 8.013132134                         | 1614.512778                                |
| 3.609505895                         | 11.8742501                                | 0.029123725                     | 5.399233139                         | 678.856782                                 |
| 4.194012809                         | 12.91934412                               | 0.013647826                     | 11.43721263                         | 2515.38924                                 |
| 3.76244682                          | 17.01670707                               | 0.026246723                     | 5.863896663                         | 888.0489152                                |
| 4.133979454                         | 17.23848695                               | 0.014340103                     | 10.23722489                         | 2178.520161                                |
| 4.20533093                          | 14.91104018                               | 0.010309531                     | 10.27442955                         | 1785.602165                                |
| 3.986250565                         | 13.83110353                               | 0.015110154                     | 7.710058047                         | 1062.88188                                 |
| 3.676580445                         | 12.01289393                               | 0.024913264                     | 5.346047937                         | 709.5496323                                |
| 3.954365553                         | 15.07137923                               | 0.021238525                     | 8.241051507                         | 1796.156438                                |
| 3.742818326                         | 12.7647143                                | 0.023751076                     | 5.950311078                         | 828.5617449                                |
| 4.011285068                         | 14.92337285                               | 0.015732435                     | 8.148734755                         | 1311.942655                                |
| 3.771775874                         | 16.68014955                               | 0.026595322                     | 6.6728643                           | 1090.88684                                 |
| 3.925957003                         | 16.8023758                                | 0.019056926                     | 8.058364899                         | 1445.695454                                |
| 4.141335421                         | 16.78046966                               | 0.013985067                     | 10.14830596                         | 1768.979724                                |
| 3.720106213                         | 16.9148451                                | 0.038008662                     | 6.837695643                         | 1366.64746                                 |
| 4.071299945                         | 20.03148231                               | 0.016763557                     | 9.618368249                         | 2400.507649                                |
| 4.013391201                         | 19.25196907                               | 0.019137499                     | 8.919302922                         | 1753.683745                                |
| 3.988943215                         | 16.84550636                               | 0.018733122                     | 8.675188456                         | 1689.485366                                |
| 3.415793102                         | 9.869327407                               | 0.031357773                     | 3.590278098                         | 269.1470906                                |
| 3.785600211                         | 16.78891349                               | 0.029041658                     | 7.141861301                         | 1307.23725                                 |
| 3.709170881                         | 14.61914825                               | 0.030787833                     | 6.747149415                         | 1177.130999                                |
| 4.009853841                         | 17.9294696                                | 0.017695227                     | 8.946230744                         | 1590.711285                                |
| 4.037119319                         | 20.01631796                               | 0.015614536                     | 8.178186424                         | 1675.55394                                 |
| 3.491087427                         | 13.80823819                               | 0.035488795                     | 4.282440983                         | 500.798762                                 |
| 3.804074978                         | 12.74949896                               | 0.024577682                     | 6.732714143                         | 1013.063862                                |
| 3.795119256                         | 15.99893247                               | 0.033511361                     | 7.183223719                         | 1585.798317                                |
| 3.885072457                         | 14.86181586                               | 0.025005635                     | 7.551219556                         | 1454.573555                                |
| 4.284993543                         | 14.73580226                               | 0.010348519                     | 12.2618512                          | 2369.263519                                |
| 4.115126333                         | 12.73951339                               | 0.011645837                     | 9.098048688                         | 1366.3906                                  |
| 3.78782124                          | 12.70407181                               | 0.021686358                     | 6.612088602                         | 947.2654505                                |
| 3.65994572                          | 13.92138904                               | 0.028091333                     | 5.365959774                         | 930.3990862                                |
| 3.742277631                         | 13.73295718                               | 0.026132248                     | 6.613883768                         | 1108.88933                                 |
| 3.734042339                         | 13.7944818                                | 0.022714841                     | 5.719199407                         | 741.5572566                                |
| 4.178005997                         | 14.69504188                               | 0.012768016                     | 10.70234515                         | 2013.770749                                |
| 4.280870043                         | 21.89361918                               | 0.011408058                     | 12.39049393                         | 2948.153279                                |
| 3.974149734                         | 13.62316662                               | 0.021321684                     | 8.885139059                         | 1602.243008                                |
| 3.736647492                         | 16.84117832                               | 0.033052837                     | 6.837720877                         | 1248.397707                                |
| 3.540454613                         | 11.76887375                               | 0.026598609                     | 4.072212423                         | 302.255856                                 |
| 4.031932783                         | 14.79926429                               | 0.017596492                     | 9.02278563                          | 1562.692056                                |
| 2.868056501                         | 10.694051                                 | 0.091718636                     | 1.878617203                         | 135.9611585                                |
| 4.04720876                          | 14.61693212                               | 0.017440896                     | 9.234001618                         | 1658.644095                                |
| 3.868344237                         | 14.07817719                               | 0.024038665                     | 6.959484525                         | 1239.044607                                |
| 3.788880707                         | 15.86367765                               | 0.025593442                     | 6.754814739                         | 1248.288376                                |
| 3.66155091                          | 15.83671538                               | 0.032441061                     | 5.726329065                         | 936.0424745                                |
| 3.261899074                         | 15.87758839                               | 0.059410299                     | 3.182982267                         | 356.8370562                                |
| 4.096350165                         | 15.07587239                               | 0.011945665                     | 8.766218611                         | 1281.273075                                |
| 4.065935235                         | 13.71503162                               | 0.014420433                     | 8.826149102                         | 1473.769466                                |
| 3.751838927                         | 13.91730097                               | 0.027684326                     | 5.79521409                          | 822.0438127                                |
| 4.056809928                         | 14.73196564                               | 0.012268797                     | 8.551110665                         | 1210.911899                                |
| 4.041046767                         | 22.89323333                               | 0.028726417                     | 9.718077371                         | 2957.293038                                |
| 3.860119539                         | 12.70780809                               | 0.019973638                     | 6.639457829                         | 892.9782936                                |
| 3.959970938                         | 16.63583019                               | 0.022560441                     | 9.406990872                         | 2020.109345                                |
| 3.430688923                         | 10.61714403                               | 0.038986657                     | 3.991794226                         | 317.8052215                                |
| 3.509164915                         | 16.92008885                               | 0.045638353                     | 4.633131358                         | 667.5127005                                |

| log.sigma.1.0.mm.3D_glc_m_SumAverage | log.sigma.1.0.mm.3D_glc_m_lmc2 | log.sigma.1.0.mm.3D_glc_m_lmc1 | log.sigma.1.0.mm.3D_glc_m_DifferenceAverage | log.sigma.1.0.mm.3D_glc_m_Id |
|--------------------------------------|--------------------------------|--------------------------------|---------------------------------------------|------------------------------|
| 43.27419842                          | 0.589568805                    | -0.055150295                   | 3.888669896                                 | 0.349955103                  |
| 23.91551067                          | 0.583581891                    | -0.071649284                   | 2.042817454                                 | 0.486401952                  |
| 21.76003347                          | 0.55508792                     | -0.064992567                   | 1.875915533                                 | 0.51812533                   |
| 31.2792402                           | 0.651537924                    | -0.08028313                    | 2.884110805                                 | 0.418209309                  |
| 27.47494248                          | 0.484020985                    | -0.040203285                   | 2.701140138                                 | 0.423210052                  |
| 31.84127609                          | 0.721966482                    | -0.102597468                   | 3.332581921                                 | 0.366854727                  |
| 29.74061832                          | 0.406989912                    | -0.028383414                   | 2.419012161                                 | 0.444102815                  |
| 33.85644946                          | 0.450143192                    | -0.035818715                   | 2.456392386                                 | 0.459832952                  |
| 33.8645333                           | 0.421640038                    | -0.028635149                   | 2.84863493                                  | 0.409604194                  |
| 31.97750402                          | 0.614694674                    | -0.068472703                   | 2.992442718                                 | 0.392561121                  |
| 23.68510281                          | 0.484345195                    | -0.04313854                    | 2.262999135                                 | 0.444823164                  |
| 36.17773138                          | 0.54123957                     | -0.048215886                   | 3.336051524                                 | 0.378841117                  |
| 33.50523944                          | 0.597886746                    | -0.078956199                   | 2.004273479                                 | 0.520490202                  |
| 35.70134947                          | 0.607977582                    | -0.066086257                   | 2.959985166                                 | 0.41175181                   |
| 37.62577235                          | 0.604604988                    | -0.062818929                   | 3.42680918                                  | 0.381384567                  |
| 31.48368961                          | 0.47127803                     | -0.04050544                    | 2.268331947                                 | 0.473531907                  |
| 21.61318153                          | 0.54219474                     | -0.050174325                   | 2.916094701                                 | 0.388385651                  |
| 29.77851694                          | 0.554945125                    | -0.06501876                    | 1.950410514                                 | 0.498828732                  |
| 29.60613018                          | 0.499722681                    | -0.045891336                   | 2.348586755                                 | 0.436647623                  |
| 33.87259031                          | 0.413562412                    | -0.026898554                   | 3.001916905                                 | 0.393870882                  |
| 25.57968982                          | 0.46158309                     | -0.04484324                    | 1.691330347                                 | 0.52964296                   |
| 23.77175187                          | 0.531137659                    | -0.04949586                    | 2.787793599                                 | 0.396999866                  |
| 33.66122945                          | 0.590375923                    | -0.066424354                   | 2.541063389                                 | 0.428817108                  |
| 29.89969206                          | 0.472979773                    | -0.038850501                   | 2.470877974                                 | 0.43623676                   |
| 32.1621219                           | 0.60915327                     | -0.070678954                   | 2.634780879                                 | 0.429126319                  |
| 38.15509345                          | 0.56247999                     | -0.05277429                    | 3.308683683                                 | 0.373537454                  |
| 31.9111745                           | 0.50752794                     | -0.041659688                   | 3.069055322                                 | 0.395649903                  |
| 33.58080748                          | 0.483079034                    | -0.04141027                    | 2.511377735                                 | 0.441622196                  |
| 23.72191613                          | 0.670478053                    | -0.08725765                    | 2.991849371                                 | 0.373995974                  |
| 31.69082467                          | 0.488801567                    | -0.043774447                   | 2.379029324                                 | 0.445799265                  |
| 35.87900302                          | 0.47788961                     | -0.040587077                   | 2.494441675                                 | 0.458025141                  |
| 31.21920191                          | 0.522608892                    | -0.051727058                   | 2.312662539                                 | 0.47097074                   |
| 31.66188162                          | 0.524294005                    | -0.0463194                     | 2.853070748                                 | 0.420490407                  |
| 29.68103267                          | 0.570841324                    | -0.057632116                   | 2.826961059                                 | 0.427412227                  |
| 28.12377468                          | 0.453861568                    | -0.033329797                   | 2.936827856                                 | 0.405287398                  |
| 29.6908788                           | 0.507027145                    | -0.048953733                   | 2.212224211                                 | 0.474594136                  |
| 43.24106556                          | 0.568280119                    | -0.058804751                   | 2.725704798                                 | 0.444534776                  |
| 41.29287794                          | 0.561556405                    | -0.063104259                   | 2.183496171                                 | 0.513079967                  |
| 33.42674952                          | 0.526388253                    | -0.050216383                   | 2.639940057                                 | 0.420021528                  |
| 23.4455744                           | 0.336187218                    | -0.017560583                   | 2.791326939                                 | 0.401579718                  |
| 23.32136956                          | 0.477957194                    | -0.042570309                   | 2.183501765                                 | 0.474030869                  |
| 25.44760484                          | 0.386389595                    | -0.021753651                   | 3.426940002                                 | 0.351521594                  |
| 31.76677732                          | 0.435562525                    | -0.031903528                   | 2.646419919                                 | 0.422599236                  |
| 33.64421075                          | 0.544666189                    | -0.047628783                   | 3.459233047                                 | 0.371969512                  |
| 36.23061808                          | 0.60741279                     | -0.068964191                   | 2.763339867                                 | 0.417563749                  |
| 25.98932237                          | 0.514789116                    | -0.046344133                   | 2.622704284                                 | 0.424023205                  |
| 29.77197101                          | 0.459248453                    | -0.035651524                   | 2.705546611                                 | 0.425594958                  |
| 23.7485002                           | 0.542194506                    | -0.057553511                   | 2.321503079                                 | 0.448473428                  |
| 25.82762571                          | 0.69232403                     | -0.089694905                   | 3.410565528                                 | 0.368254877                  |
| 34.03341414                          | 0.548195873                    | -0.058206347                   | 2.329155426                                 | 0.450120831                  |
| 34.25788974                          | 0.504929465                    | -0.041030067                   | 3.145936508                                 | 0.383093015                  |
| 29.7944785                           | 0.438187213                    | -0.029158194                   | 3.337830696                                 | 0.360262927                  |
| 27.66220705                          | 0.366533919                    | -0.021131211                   | 2.89053099                                  | 0.391670261                  |
| 24.02578786                          | 0.549917382                    | -0.057676358                   | 2.292929958                                 | 0.445377323                  |
| 30.12102833                          | 0.598285872                    | -0.066719257                   | 2.734893934                                 | 0.419589827                  |
| 25.5294286                           | 0.454545876                    | -0.036713167                   | 2.407292971                                 | 0.437976223                  |
| 29.83821978                          | 0.428099938                    | -0.029265734                   | 2.874366782                                 | 0.402618482                  |
| 33.32356636                          | 0.484085182                    | -0.041740125                   | 2.43761352                                  | 0.45098564                   |
| 33.55458465                          | 0.540048944                    | -0.051093566                   | 2.834644985                                 | 0.40734622                   |
| 33.4608398                           | 0.430728866                    | -0.028283751                   | 3.171055139                                 | 0.394480491                  |
| 33.77471614                          | 0.592108325                    | -0.069761945                   | 2.346712732                                 | 0.473843566                  |
| 39.72486723                          | 0.557790821                    | -0.052062259                   | 3.189198112                                 | 0.396919088                  |
| 38.16863165                          | 0.440416582                    | -0.031233364                   | 2.944085265                                 | 0.408070094                  |
| 33.544497                            | 0.402561021                    | -0.026244215                   | 2.866989278                                 | 0.412269919                  |
| 19.73865481                          | 0.487023057                    | -0.047485404                   | 1.943701389                                 | 0.470688826                  |
| 33.4867592                           | 0.499746397                    | -0.044889644                   | 2.486089342                                 | 0.452840429                  |
| 29.2382965                           | 0.583512679                    | -0.066155254                   | 2.490336939                                 | 0.453335518                  |
| 35.60720015                          | 0.419124758                    | -0.027959931                   | 2.984570677                                 | 0.404781342                  |
| 39.69814666                          | 0.416034733                    | -0.02691721                    | 3.009446916                                 | 0.396695613                  |
| 27.61647638                          | 0.416192781                    | -0.033239472                   | 1.982503388                                 | 0.486044458                  |
| 25.49899792                          | 0.556908192                    | -0.057816454                   | 2.550610672                                 | 0.435727132                  |
| 31.96069159                          | 0.495747495                    | -0.044955406                   | 2.385324474                                 | 0.466746626                  |
| 29.7204737                           | 0.570686765                    | -0.059377515                   | 2.573093582                                 | 0.447277083                  |
| 29.39176035                          | 0.538067491                    | -0.045366421                   | 3.566837664                                 | 0.359471471                  |
| 25.47902678                          | 0.445279237                    | -0.030885204                   | 3.165479107                                 | 0.372378253                  |
| 25.40814362                          | 0.557313321                    | -0.057174566                   | 2.571118467                                 | 0.428636323                  |
| 27.83832393                          | 0.469616911                    | -0.040777745                   | 2.23430141                                  | 0.457989764                  |
| 27.46591437                          | 0.599013998                    | -0.070132488                   | 2.502820286                                 | 0.438347715                  |
| 27.58896361                          | 0.475528926                    | -0.040467315                   | 2.410273948                                 | 0.433039748                  |
| 29.339412                            | 0.523358183                    | -0.043968471                   | 3.282839969                                 | 0.380540005                  |
| 43.34095332                          | 0.607770946                    | -0.060325918                   | 3.74786222                                  | 0.358984438                  |
| 27.23294924                          | 0.587425254                    | -0.062145617                   | 2.880232152                                 | 0.424787292                  |
| 33.62375999                          | 0.534352112                    | -0.053466125                   | 2.386544392                                 | 0.47055101                   |
| 23.5377475                           | 0.353960132                    | -0.022614159                   | 2.064917892                                 | 0.459855478                  |
| 29.58753447                          | 0.531021487                    | -0.048045799                   | 2.961399144                                 | 0.41037336                   |
| 21.38810201                          | 0.433079285                    | -0.050534002                   | 1.190280497                                 | 0.610850411                  |
| 29.22523626                          | 0.559087898                    | -0.053703867                   | 2.973226346                                 | 0.41040514                   |
| 28.15635438                          | 0.51416195                     | -0.047658963                   | 2.497836373                                 | 0.443156865                  |
| 31.7273553                           | 0.553822556                    | -0.057471339                   | 2.494595052                                 | 0.441663595                  |
| 31.67343075                          | 0.511211988                    | -0.049851243                   | 2.256195698                                 | 0.467765628                  |
| 31.75517678                          | 0.500508182                    | -0.057205067                   | 1.608074636                                 | 0.535566293                  |
| 30.15174479                          | 0.458764255                    | -0.033226254                   | 3.103489751                                 | 0.374528972                  |
| 27.42075177                          | 0.415795852                    | -0.027013728                   | 2.997953533                                 | 0.392934967                  |
| 27.83460195                          | 0.453773069                    | -0.037097848                   | 2.287627344                                 | 0.456598064                  |
| 29.44319783                          | 0.39460283                     | -0.023893766                   | 3.046020493                                 | 0.381540556                  |
| 45.55814445                          | 0.5790997                      | -0.060454603                   | 2.926837186                                 | 0.443761278                  |
| 25.41561618                          | 0.436077079                    | -0.03193533                    | 2.580894152                                 | 0.424561218                  |
| 33.24412204                          | 0.667910764                    | -0.086783885                   | 2.928119088                                 | 0.422523046                  |
| 21.23428807                          | 0.530294378                    | -0.057225653                   | 1.980135067                                 | 0.488123111                  |
| 33.82960913                          | 0.420543809                    | -0.035113433                   | 1.943959316                                 | 0.502244338                  |

| log.sigma.1.0.mm.3D_glcm_ClusterTendency | log.sigma.1.0.mm.3D_firstorder_InterquartileRange | log.sigma.1.0.mm.3D_firstorder_Skewness | log.sigma.1.0.mm.3D_firstorder_Uniformity |
|------------------------------------------|---------------------------------------------------|-----------------------------------------|-------------------------------------------|
| 26.50950614                              | 90.58059454                                       | -0.677860269                            | 0.09411968                                |
| 9.878412488                              | 46.49548244                                       | -0.529066824                            | 0.173503389                               |
| 9.106490444                              | 41.29746795                                       | -0.390558915                            | 0.18652737                                |
| 19.02593796                              | 66.70136833                                       | -1.152367038                            | 0.122972691                               |
| 15.46603087                              | 65.29584932                                       | -0.893681785                            | 0.131484261                               |
| 24.4774659                               | 81.0048542                                        | -0.286937799                            | 0.106818182                               |
| 12.79296584                              | 61.62198639                                       | -0.281977327                            | 0.137093326                               |
| 14.5159991                               | 50.94427967                                       | -0.658507926                            | 0.158862309                               |
| 16.46822777                              | 69.27736092                                       | -0.737918459                            | 0.12270085                                |
| 18.30458551                              | 76.71027422                                       | -0.918155299                            | 0.11223442                                |
| 10.37921354                              | 62.4005065                                        | -0.647617622                            | 0.143287084                               |
| 22.31449537                              | 78.2862978                                        | -1.088714038                            | 0.110365564                               |
| 12.05214732                              | 35.50232887                                       | -1.015424682                            | 0.214386596                               |
| 19.77852207                              | 67.46342659                                       | -0.691022615                            | 0.123987098                               |
| 21.35088738                              | 71.57671928                                       | -0.837450262                            | 0.113065817                               |
| 12.98107522                              | 48.72861528                                       | -0.914733663                            | 0.162901496                               |
| 16.30176797                              | 81.85209703                                       | -1.173611197                            | 0.109117615                               |
| 10.07412475                              | 42.52455616                                       | -1.022897035                            | 0.18696511                                |
| 10.53509491                              | 59.44325447                                       | -0.423561972                            | 0.141916805                               |
| 18.9388911                               | 70.87602425                                       | -0.738940409                            | 0.117590526                               |
| 7.161007417                              | 38.79879045                                       | -0.137968408                            | 0.202802186                               |
| 13.93983856                              | 73.24586296                                       | -0.660613205                            | 0.118498661                               |
| 13.26689404                              | 62.53048372                                       | -0.725833602                            | 0.132390976                               |
| 13.24455544                              | 64.39832592                                       | -0.458601969                            | 0.132881541                               |
| 15.94175771                              | 61.32740116                                       | -0.677447517                            | 0.134083994                               |
| 21.87822276                              | 80.32187271                                       | -0.150606457                            | 0.103310828                               |
| 20.4506602                               | 75.7329216                                        | -0.441484469                            | 0.110390461                               |
| 14.51460524                              | 57.28065252                                       | -1.03612466                             | 0.144823641                               |
| 14.99441401                              | 77.92748356                                       | -0.343563322                            | 0.115305116                               |
| 12.24692652                              | 54.93813205                                       | -1.084807787                            | 0.152577107                               |
| 14.69781873                              | 51.99019384                                       | -0.815608133                            | 0.156920465                               |
| 11.97253275                              | 47.25492859                                       | -1.196820571                            | 0.167183592                               |
| 19.08949285                              | 66.06396103                                       | -0.152069592                            | 0.123861728                               |
| 19.43892542                              | 64.02222681                                       | -0.770040354                            | 0.127907288                               |
| 19.12451612                              | 74.12895441                                       | -0.48347657                             | 0.114071119                               |
| 12.26434185                              | 48.77240086                                       | -0.474474292                            | 0.163672319                               |
| 16.89506126                              | 53.2085247                                        | -1.050555535                            | 0.150907337                               |
| 12.74626029                              | 64.365862274                                      | -0.859970395                            | 0.203896347                               |
| 13.19369471                              | 63.00997829                                       | -1.338063142                            | 0.139056117                               |
| 15.37459507                              | 77.39374876                                       | -0.198242406                            | 0.113188529                               |
| 11.03808999                              | 47.6603415                                        | -0.636538743                            | 0.165941033                               |
| 21.39250776                              | 100.836422                                        | 0.021219101                             | 0.090634157                               |
| 15.07059811                              | 67.32978439                                       | -0.763745538                            | 0.12790248                                |
| 23.37463802                              | 81.91329145                                       | -0.789835226                            | 0.103493231                               |
| 17.40852347                              | 64.94287014                                       | -1.062218238                            | 0.128330407                               |
| 15.22404509                              | 65.28742409                                       | -0.086701277                            | 0.124289568                               |
| 16.56076524                              | 63.58452511                                       | -0.256682752                            | 0.129902088                               |
| 10.76685607                              | 51.11168957                                       | -0.818367131                            | 0.160860012                               |
| 23.47575284                              | 81.32547092                                       | -0.60031138                             | 0.105742743                               |
| 12.66636172                              | 57.11981201                                       | -0.759049994                            | 0.143591786                               |
| 20.68149282                              | 75.11499786                                       | -0.630247148                            | 0.111986934                               |
| 21.05311521                              | 93.06958199                                       | -0.251728456                            | 0.095766929                               |
| 15.80106543                              | 75.34866047                                       | -0.444651308                            | 0.114942109                               |
| 11.15286006                              | 59.25620651                                       | -0.253467691                            | 0.144351567                               |
| 17.53345792                              | 62.28410387                                       | -0.292223776                            | 0.132229069                               |
| 12.37435618                              | 61.26698589                                       | -1.013839622                            | 0.142453649                               |
| 16.7791305                               | 76.14567757                                       | -0.589142124                            | 0.114060026                               |
| 13.4584849                               | 55.84579039                                       | -0.889797777                            | 0.147723772                               |
| 15.95128069                              | 66.93495321                                       | -0.740763999                            | 0.129846268                               |
| 20.005756                                | 78.75377083                                       | -0.359634939                            | 0.109658484                               |
| 13.97689506                              | 47.80673039                                       | -0.530699097                            | 0.164414273                               |
| 19.77579461                              | 70.48724031                                       | -0.925274889                            | 0.120760286                               |
| 17.84955155                              | 67.1875515                                        | -0.447475025                            | 0.123033507                               |
| 17.07362013                              | 66.15616131                                       | -0.654872764                            | 0.128077757                               |
| 7.512882696                              | 52.85439897                                       | -0.71963276                             | 0.164204454                               |
| 14.05651943                              | 51.80305004                                       | -0.888082025                            | 0.154570647                               |
| 13.09513681                              | 52.86344814                                       | -1.007740179                            | 0.157860194                               |
| 17.3458274                               | 66.51460123                                       | -0.605853348                            | 0.124935885                               |
| 17.6586208                               | 72.55718613                                       | -0.715571564                            | 0.118435746                               |
| 8.862676225                              | 47.20087504                                       | -1.092594938                            | 0.172043879                               |
| 13.85133084                              | 57.15009499                                       | -0.797759941                            | 0.141364738                               |
| 15.02821537                              | 49.65773964                                       | -0.64965558                             | 0.160687456                               |
| 15.92106595                              | 61.10286045                                       | -0.416464981                            | 0.132648843                               |
| 24.3629398                               | 95.97359276                                       | -0.479494037                            | 0.093485289                               |
| 18.61598533                              | 88.15844154                                       | -0.284907162                            | 0.099477199                               |
| 13.53090724                              | 63.44874334                                       | -0.777440358                            | 0.135650685                               |
| 11.36606695                              | 55.13888717                                       | 0.018216308                             | 0.153081025                               |
| 13.22326228                              | 55.84947062                                       | -1.169657234                            | 0.147900768                               |
| 11.82087474                              | 60.19151211                                       | -0.855515946                            | 0.140402952                               |
| 21.16242297                              | 82.46245956                                       | -0.457546405                            | 0.106058742                               |
| 25.38139649                              | 86.18840981                                       | -0.699345196                            | 0.097446211                               |
| 17.57122458                              | 62.05255699                                       | -0.78267099                             | 0.129279097                               |
| 13.52705867                              | 48.59697723                                       | -0.755697169                            | 0.158979376                               |
| 8.450658968                              | 56.30848503                                       | -0.550550459                            | 0.156866609                               |
| 18.13742617                              | 71.31765175                                       | -0.645660557                            | 0.117859452                               |
| 4.01144131                               | 25.67845976                                       | -1.851103987                            | 0.287391181                               |
| 18.665881                                | 73.12261581                                       | -0.607838735                            | 0.116570811                               |
| 14.95682776                              | 62.21227551                                       | -0.513022441                            | 0.132640754                               |
| 13.88211312                              | 57.39825916                                       | -1.18680109                             | 0.146771141                               |
| 11.77583088                              | 50.13351631                                       | -1.157914158                            | 0.161901905                               |
| 7.217127229                              | 36.48025012                                       | -0.231086575                            | 0.217567936                               |
| 18.10490592                              | 87.67400503                                       | -0.349153519                            | 0.102157872                               |
| 18.01303803                              | 77.00953484                                       | -0.515402776                            | 0.111649123                               |
| 12.47245433                              | 54.37428117                                       | -0.724006821                            | 0.14878641                                |
| 17.12167439                              | 87.19657516                                       | -0.343860976                            | 0.105686491                               |
| 21.51433884                              | 55.01491666                                       | -1.052069715                            | 0.144732694                               |
| 13.79557132                              | 63.9632473                                        | -0.477632329                            | 0.131508594                               |
| 18.45308895                              | 62.85665226                                       | -0.985232558                            | 0.134623051                               |
| 8.115192466                              | 47.81302261                                       | -0.852963041                            | 0.179065381                               |
| 9.959465298                              | 42.22573519                                       | -0.47007445                             | 0.18760382                                |

| log.sigma.1.0.mm.3D_firstorder_MeanAbsoluteDeviation | log.sigma.1.0.mm.3D_firstorder_Energy | log.sigma.1.0.mm.3D_firstorder_RobustMeanAbsoluteDeviation | log.sigma.1.0.mm.3D_firstorder_Median |
|------------------------------------------------------|---------------------------------------|------------------------------------------------------------|---------------------------------------|
| 66.28207711                                          | 17790484.64                           | 40.19231302                                                | 12.99256849                           |
| 37.56855855                                          | 3102016.179                           | 20.7201142                                                 | 13.70211029                           |
| 36.19111988                                          | 4607277.546                           | 19.92748964                                                | 7.581020594                           |
| 53.1448634                                           | 5614996.747                           | 30.76450088                                                | 13.13407421                           |
| 48.91421962                                          | 11177530.01                           | 28.92525202                                                | 15.27101851                           |
| 59.30824006                                          | 4928494.595                           | 34.19558576                                                | 14.22535753                           |
| 45.15115184                                          | 23508589.93                           | 26.91485339                                                | 11.36641121                           |
| 44.28683355                                          | 24306026.31                           | 22.94915818                                                | 13.21196651                           |
| 50.41385078                                          | 23239815.92                           | 30.10820371                                                | 16.94943428                           |
| 55.27136567                                          | 6453860.332                           | 33.51723689                                                | 22.95978832                           |
| 41.27237582                                          | 4802244.446                           | 26.33774182                                                | 12.91162491                           |
| 58.25524639                                          | 16874759.53                           | 33.68485659                                                | 23.74970627                           |
| 35.09199022                                          | 6845956.868                           | 15.84895545                                                | 8.153153419                           |
| 52.82205758                                          | 10300012.39                           | 29.83622744                                                | 15.24710846                           |
| 58.53829627                                          | 14547514.5                            | 32.84723466                                                | 17.83259964                           |
| 41.02238782                                          | 17046762.54                           | 22.25490944                                                | 10.02537489                           |
| 52.75289451                                          | 5859109.734                           | 34.40478053                                                | 13.05777884                           |
| 35.3804755                                           | 3778221.106                           | 19.09233807                                                | 12.14226246                           |
| 42.39696266                                          | 4480858.054                           | 26.16521548                                                | 12.96213818                           |
| 53.20095919                                          | 31148447.11                           | 31.20748824                                                | 16.07486153                           |
| 31.75742406                                          | 6946373.774                           | 17.39175383                                                | 9.224973202                           |
| 49.87188726                                          | 4963106.846                           | 31.78163041                                                | 16.74107742                           |
| 46.69761521                                          | 4539639.745                           | 27.64947251                                                | 13.407691                             |
| 45.57857281                                          | 11063834.33                           | 27.71307851                                                | 11.72421741                           |
| 48.98032777                                          | 6913994.92                            | 27.67881819                                                | 15.6707058                            |
| 60.78111572                                          | 18419197.99                           | 35.82266842                                                | 20.55641747                           |
| 56.26005739                                          | 20594788.08                           | 33.56199085                                                | 14.673666                             |
| 44.63096559                                          | 12117066.52                           | 24.92929459                                                | 11.56316328                           |
| 51.21048085                                          | 2087466.141                           | 33.35358298                                                | 17.27333069                           |
| 41.82803004                                          | 7881202.182                           | 23.87569225                                                | 17.47236156                           |
| 44.01895218                                          | 22419188.71                           | 23.34209792                                                | 12.55656195                           |
| 40.44688217                                          | 7614343.501                           | 21.61369171                                                | 9.188030243                           |
| 51.6558253                                           | 18110360.04                           | 29.67768872                                                | 10.40223598                           |
| 51.8055036                                           | 13866763.42                           | 28.96093734                                                | 13.89665937                           |
| 54.92823771                                          | 27879809.17                           | 32.40483321                                                | 21.37578773                           |
| 41.14187622                                          | 11905181.6                            | 22.11570427                                                | 11.1193924                            |
| 45.52021498                                          | 18954869.26                           | 23.73097922                                                | 9.003048897                           |
| 37.23762427                                          | 20106111.94                           | 17.07806062                                                | 5.072403908                           |
| 45.39818937                                          | 5062978.787                           | 27.517877                                                  | 14.50809479                           |
| 51.39328561                                          | 34224408.24                           | 33.1877511                                                 | 8.370133877                           |
| 39.56369101                                          | 8549970.598                           | 22.05898705                                                | 6.683179379                           |
| 62.58722594                                          | 24888397.75                           | 42.52974293                                                | 6.388998985                           |
| 48.40141365                                          | 17099108.88                           | 29.21263137                                                | 15.82720375                           |
| 60.23457794                                          | 17896103.11                           | 35.85595626                                                | 14.78806782                           |
| 49.83639322                                          | 7298205.897                           | 28.43214148                                                | 23.91561413                           |
| 50.13461912                                          | 14204528.21                           | 29.66852566                                                | 14.55271816                           |
| 49.67908569                                          | 24392278.62                           | 28.2327608                                                 | 12.9341732                            |
| 40.49109782                                          | 3210469.646                           | 22.98144874                                                | 15.47907925                           |
| 60.00852238                                          | 5989878.936                           | 35.89509824                                                | 21.26153755                           |
| 43.4855633                                           | 5573453.149                           | 25.84547052                                                | 17.0042057                            |
| 55.99100376                                          | 17121114.88                           | 32.84576697                                                | 20.37081337                           |
| 60.94478953                                          | 22101411.65                           | 39.82040485                                                | 16.34927559                           |
| 52.18058119                                          | 22762071.56                           | 32.64548707                                                | 15.0471406                            |
| 42.40261057                                          | 4163569.946                           | 25.47530805                                                | 15.84453106                           |
| 49.56623043                                          | 7402831.937                           | 27.51497804                                                | 16.46425343                           |
| 43.6640809                                           | 7650862.888                           | 25.64628934                                                | 13.87776947                           |
| 52.77147302                                          | 21611885.21                           | 32.58485484                                                | 17.5509758                            |
| 43.41494401                                          | 14045999.71                           | 24.35640658                                                | 8.106189728                           |
| 49.49666198                                          | 8369068.023                           | 28.70602631                                                | 13.92612028                           |
| 55.29233952                                          | 53204459.98                           | 33.96381427                                                | 4.958934784                           |
| 43.09088846                                          | 8153618.95                            | 22.07346358                                                | 12.7825937                            |
| 53.61845901                                          | 16923669.23                           | 30.4580149                                                 | 16.74026585                           |
| 52.65078579                                          | 34600547.35                           | 30.1618656                                                 | 15.28552628                           |
| 50.3305648                                           | 41028615.95                           | 28.86756344                                                | 12.99908543                           |
| 35.73141879                                          | 1929540.219                           | 22.73500148                                                | 14.2615509                            |
| 43.54644543                                          | 16997561.54                           | 23.26365083                                                | 10.5799036                            |
| 43.40989542                                          | 5593055.292                           | 23.05319034                                                | 9.390732765                           |
| 51.11351347                                          | 33499204.23                           | 29.6791451                                                 | 11.80643559                           |
| 52.38995647                                          | 33158272.21                           | 31.19085255                                                | 16.53112793                           |
| 36.1433925                                           | 8421096.767                           | 20.77967053                                                | 10.46588278                           |
| 45.28048819                                          | 5572155.367                           | 26.06135658                                                | 12.32857609                           |
| 43.99105911                                          | 21036675.57                           | 22.60268059                                                | 14.11694145                           |
| 49.06238468                                          | 11831604.89                           | 27.5348364                                                 | 13.15626621                           |
| 64.60458685                                          | 16674373.94                           | 41.19645502                                                | 14.19503975                           |
| 58.1082811                                           | 18495854.67                           | 37.81423129                                                | 11.39513683                           |
| 45.98134544                                          | 5506960.185                           | 27.60586405                                                | 13.8337636                            |
| 41.68767111                                          | 9335467.975                           | 23.87419275                                                | 13.84476233                           |
| 43.93747325                                          | 4117230.372                           | 24.46168264                                                | 14.81878376                           |
| 43.4988911                                           | 6359962.678                           | 26.65338356                                                | 14.24556923                           |
| 57.75092249                                          | 14843889.42                           | 35.55931325                                                | 10.51817322                           |
| 64.39069792                                          | 16068061.34                           | 38.72886324                                                | 13.19628334                           |
| 52.1437041                                           | 10198671.9                            | 29.3432325                                                 | 11.62078857                           |
| 42.31184113                                          | 13829691.73                           | 22.43058506                                                | 8.787262917                           |
| 37.1180823                                           | 7779005.489                           | 23.83269902                                                | 11.77324486                           |
| 53.5161772                                           | 13779981.93                           | 31.90456309                                                | 12.36277103                           |
| 21.94616679                                          | 1855743.93                            | 11.74128034                                                | 7.364732504                           |
| 53.88200283                                          | 13465279.14                           | 32.18637327                                                | 9.491560936                           |
| 47.92507693                                          | 13831352.14                           | 27.71026021                                                | 18.8314991                            |
| 44.04845435                                          | 6446894.058                           | 24.96521303                                                | 15.68967533                           |
| 40.98875484                                          | 7678351.902                           | 22.76245542                                                | 14.08389664                           |
| 30.7706465                                           | 3036816.728                           | 16.32024092                                                | 9.497834206                           |
| 57.00126651                                          | 14003774.08                           | 37.39986998                                                | 17.83796024                           |
| 54.56074531                                          | 29039911.35                           | 33.62298307                                                | 13.86793327                           |
| 42.32845583                                          | 12718557.48                           | 24.21463793                                                | 15.0095253                            |
| 55.0748675                                           | 22772426.93                           | 36.4187959                                                 | 12.54909897                           |
| 51.01292318                                          | 22146932.46                           | 26.33421035                                                | 12.62462378                           |
| 46.50491539                                          | 11893055.23                           | 27.95674047                                                | 11.41642094                           |
| 51.1852803                                           | 6025880.594                           | 27.63267374                                                | 10.26098537                           |
| 35.29539106                                          | 2039272.583                           | 20.77595124                                                | 8.867621422                           |
| 36.47633411                                          | 18837994.42                           | 19.14587393                                                | 10.53753424                           |

| log.sigma.1.0.mm.3D_firstorder_TotalEnergy | log.sigma.1.0.mm.3D_firstorder_Maximum | log.sigma.1.0.mm.3D_firstorder_RootMeanSquared | log.sigma.1.0.mm.3D_firstorder_90Percentile | log.sigma.1.0.mm.3D_firstorder_Minimum |
|--------------------------------------------|----------------------------------------|------------------------------------------------|---------------------------------------------|----------------------------------------|
| 480343085.2                                | 286.7011108                            | 91.56325008                                    | 111.2729904                                 | -502.5111694                           |
| 83754436.83                                | 244.7350769                            | 57.59916981                                    | 73.40239563                                 | -258.6973877                           |
| 124396493.7                                | 217.3698425                            | 54.803653                                      | 77.21884079                                 | -248.290863                            |
| 151604912.2                                | 206.3257599                            | 75.81017037                                    | 89.24919128                                 | -373.0960083                           |
| 301793310.1                                | 209.3660889                            | 68.70400797                                    | 82.90274582                                 | -307.492981                            |
| 133069354.1                                | 337.3200989                            | 86.4142121                                     | 107.7741501                                 | -362.4914856                           |
| 634731928.2                                | 323.7756042                            | 64.49865178                                    | 86.62988281                                 | -345.0723572                           |
| 656262710.4                                | 360.7756042                            | 68.98132587                                    | 85.03427277                                 | -383.7451172                           |
| 627475029.8                                | 342.7807312                            | 71.49927304                                    | 87.41932297                                 | -384.3026428                           |
| 174254229                                  | 258.8742676                            | 77.59118572                                    | 96.69889221                                 | -365.1428528                           |
| 129660600                                  | 219.2437897                            | 56.43148263                                    | 72.72056274                                 | -257.5276184                           |
| 455618507.3                                | 325.9449768                            | 85.56247361                                    | 108.1085281                                 | -405.2306213                           |
| 184840835.4                                | 276.450592                             | 60.55429055                                    | 59.68759842                                 | -383.9767761                           |
| 278100334.5                                | 292.0558777                            | 77.45219424                                    | 92.39791412                                 | -404.6757507                           |
| 392782891.4                                | 411.6424255                            | 85.62953101                                    | 102.6303329                                 | -442.1347046                           |
| 460262588.5                                | 324.6344604                            | 62.41404059                                    | 72.64895248                                 | -360.4248657                           |
| 158195962.8                                | 280.2818298                            | 70.05088922                                    | 89.10872421                                 | -245.9830322                           |
| 102011969.9                                | 260.2957458                            | 55.35567446                                    | 67.17674561                                 | -325.2833252                           |
| 120983167.5                                | 242.4565735                            | 58.75478575                                    | 71.44372101                                 | -333.1778259                           |
| 841008071.9                                | 391.24823                              | 77.40308872                                    | 97.37016907                                 | -386.5374756                           |
| 187552091.9                                | 209.0856934                            | 47.92787576                                    | 58.93619232                                 | -275.275238                            |
| 134003884.8                                | 196.1129761                            | 67.82129687                                    | 87.99305878                                 | -271.9329529                           |
| 122570273.1                                | 273.0772095                            | 66.58259486                                    | 82.79594116                                 | -386.4660034                           |
| 298723527                                  | 229.9455414                            | 64.6510915                                     | 87.76724701                                 | -345.7321472                           |
| 186677862.8                                | 261.8060913                            | 73.69708772                                    | 98.84937286                                 | -354.8457947                           |
| 497318345.8                                | 363.2203979                            | 88.1764942                                     | 118.4071259                                 | -425.3013306                           |
| 556050278.3                                | 317.4775391                            | 79.81339992                                    | 106.0300537                                 | -364.350708                            |
| 328780796                                  | 252.7750854                            | 66.39868861                                    | 75.94398346                                 | -385.3608398                           |
| 56361585.79                                | 218.4671631                            | 68.33700771                                    | 91.66105042                                 | -253.4367828                           |
| 212792458.9                                | 238.0174255                            | 61.9435391                                     | 74.17604752                                 | -366.4304199                           |
| 605318095.2                                | 372.5895081                            | 68.6432326                                     | 85.16087036                                 | -408.5704956                           |
| 205587274.5                                | 230.4121857                            | 60.66469063                                    | 66.3172226                                  | -355.2524719                           |
| 488979721                                  | 398.8340454                            | 74.89098102                                    | 89.79989929                                 | -373.2358398                           |
| 374402612.2                                | 352.949585                             | 76.81634195                                    | 95.78590622                                 | -342.2538452                           |
| 752754847.6                                | 385.4857788                            | 79.56484906                                    | 111.2049606                                 | -318.9483948                           |
| 321439903.1                                | 399.734314                             | 63.00569105                                    | 77.13538361                                 | -325.6660767                           |
| 511781470                                  | 389.0434265                            | 71.37244286                                    | 74.5022583                                  | -514.4187622                           |
| 542865022.4                                | 316.9378662                            | 62.41617039                                    | 73.84025574                                 | -486.7036133                           |
| 136700427.2                                | 208.3832092                            | 64.15795287                                    | 73.34961319                                 | -384.0026855                           |
| 924059022.6                                | 289.9842224                            | 68.61210893                                    | 89.70534515                                 | -269.7449341                           |
| 230849206.2                                | 233.3043671                            | 57.41129257                                    | 63.87603951                                 | -272.6494751                           |
| 671986739.4                                | 324.6063232                            | 80.2253062                                     | 106.5393265                                 | -291.3910828                           |
| 461675939.8                                | 297.624115                             | 68.41666536                                    | 86.91148071                                 | -374.9436951                           |
| 483194783.9                                | 282.9548035                            | 84.81136414                                    | 97.42412796                                 | -389.7089844                           |
| 197051559.2                                | 299.0422974                            | 75.56881792                                    | 94.70806808                                 | -400.5531921                           |
| 383522261.7                                | 398.0515442                            | 71.9353287                                     | 94.36531525                                 | -285.8537598                           |
| 658591522.7                                | 346.2671204                            | 73.1220815                                     | 89.5425415                                  | -338.8779602                           |
| 86682680.45                                | 251.0748901                            | 60.71209321                                    | 69.10263062                                 | -269.0621948                           |
| 161726731.3                                | 326.6192322                            | 83.89657709                                    | 109.0891495                                 | -284.4044495                           |
| 150483235                                  | 205.456955                             | 64.20573642                                    | 91.23187027                                 | -381.8583374                           |
| 462270101.6                                | 390.5713501                            | 81.63642322                                    | 108.8169037                                 | -387.916687                            |
| 596738114.5                                | 326.2858276                            | 80.97121024                                    | 104.5143509                                 | -347.3426208                           |
| 614575932                                  | 293.002655                             | 71.02665248                                    | 88.27369232                                 | -307.1376343                           |
| 112416388.5                                | 276.742218                             | 61.41131482                                    | 78.79454727                                 | -259.478241                            |
| 199876462.3                                | 286.7480162                            | 74.60589153                                    | 92.8872757                                  | -347.8613586                           |
| 206573298                                  | 262.895752                             | 62.63800308                                    | 75.17013626                                 | -293.3444519                           |
| 583520900.7                                | 342.3215332                            | 73.09489778                                    | 96.11053314                                 | -333.709198                            |
| 379241992.3                                | 293.8471985                            | 63.73292242                                    | 68.75937576                                 | -391.4679565                           |
| 225964836.6                                | 309.9490356                            | 71.26231806                                    | 83.10242691                                 | -379.0370178                           |
| 1436520420                                 | 314.2078857                            | 76.34180363                                    | 96.5987854                                  | -385.936554                            |
| 220147711.6                                | 314.3204651                            | 67.94849721                                    | 79.96979523                                 | -379.7272949                           |
| 456939069.2                                | 422.8525085                            | 79.61440131                                    | 100.0281815                                 | -460.710144                            |
| 934214778.4                                | 324.1835022                            | 77.31071854                                    | 105.9625366                                 | -429.177124                            |
| 1107772631                                 | 387.6860352                            | 73.36357284                                    | 85.73569641                                 | -384.4518433                           |
| 52097585.9                                 | 162.875824                             | 49.42120975                                    | 63.00412178                                 | -201.4844055                           |
| 458934161.7                                | 361.6758728                            | 66.34178866                                    | 75.15856781                                 | -384.6629639                           |
| 151012492.9                                | 260.7280884                            | 65.49162413                                    | 69.94693985                                 | -340.7894897                           |
| 904478514.3                                | 358.2336731                            | 73.21115132                                    | 86.67287292                                 | -420.3146362                           |
| 895273349.6                                | 437.8847656                            | 75.24165407                                    | 91.95401459                                 | -460.0982361                           |
| 227369612.7                                | 187.6569672                            | 53.90575565                                    | 66.86496506                                 | -321.1386719                           |
| 150448194.9                                | 266.9620972                            | 65.49483209                                    | 78.77129669                                 | -286.7373657                           |
| 567990240.4                                | 342.8551636                            | 70.02609499                                    | 89.78336258                                 | -367.4375                              |
| 319453331.9                                | 297.4234314                            | 72.05260159                                    | 90.30759735                                 | -331.9836731                           |
| 450208096.4                                | 381.9251709                            | 85.91453679                                    | 103.7230728                                 | -342.3549805                           |
| 499388076                                  | 301.5239868                            | 76.85916612                                    | 99.64801788                                 | -297.2276917                           |
| 148687925                                  | 275.0829773                            | 64.05893445                                    | 72.24326019                                 | -281.9018555                           |
| 252057635.3                                | 342.9224243                            | 62.42012584                                    | 74.0908699                                  | -324.3373108                           |
| 111165220.1                                | 218.659668                             | 65.55711444                                    | 74.45777359                                 | -311.1514893                           |
| 171718992.3                                | 213.2333679                            | 61.03943753                                    | 80.82612152                                 | -313.9656982                           |
| 400785014.4                                | 355.4069519                            | 79.66338283                                    | 94.97935333                                 | -348.9838867                           |
| 433837656.2                                | 286.7011108                            | 89.88026597                                    | 109.4510941                                 | -502.5111694                           |
| 275364141.4                                | 338.7140198                            | 75.29328205                                    | 85.01956024                                 | -321.7772522                           |
| 373401676.7                                | 312.3144836                            | 65.04273421                                    | 79.10450592                                 | -395.5055237                           |
| 210033148.2                                | 167.5216827                            | 50.31306316                                    | 65.27076416                                 | -267.2184448                           |
| 372059512.1                                | 287.5323792                            | 75.16547804                                    | 90.83570251                                 | -332.3526611                           |
| 50105086.11                                | 130.7450409                            | 34.8040386                                     | 40.86743698                                 | -238.6472015                           |
| 363562536.8                                | 307.9350281                            | 75.13866745                                    | 83.57688141                                 | -341.5506897                           |
| 373446507.9                                | 258.1136169                            | 71.02293151                                    | 101.8381844                                 | -303.2186279                           |
| 174066139.6                                | 231.350235                             | 66.35974804                                    | 81.1328598                                  | -368.5909119                           |
| 207315501.4                                | 241.5537109                            | 61.57742051                                    | 74.00897522                                 | -374.9681702                           |
| 81994051.66                                | 217.5070801                            | 48.25813076                                    | 63.20628548                                 | -369.9934998                           |
| 378101900.2                                | 250.6427002                            | 65.67462654                                    | 107.120623                                  | -334.8939209                           |
| 784077606.5                                | 348.1105042                            | 74.85262561                                    | 90.37943726                                 | -308.148468                            |
| 343401051.9                                | 256.5763855                            | 62.08146524                                    | 83.4436409                                  | -309.6954651                           |
| 614855527.2                                | 363.7046204                            | 72.33695366                                    | 87.81816864                                 | -335.2077637                           |
| 597967176.4                                | 359.9611206                            | 80.44828459                                    | 101.4780373                                 | -529.5641479                           |
| 321112491.3                                | 265.0306396                            | 64.97604822                                    | 79.42763672                                 | -286.2237854                           |
| 162698776                                  | 239.8834686                            | 75.86420655                                    | 78.08294373                                 | -375.1214294                           |
| 55060359.74                                | 154.4839325                            | 49.44866998                                    | 60.02380295                                 | -235.9374084                           |
| 508625849.3                                | 253.6916351                            | 57.11878255                                    | 75.43101196                                 | -377.8802185                           |

| log.sigma.1.0.mm.3D_firstorder_Entropy | log.sigma.1.0.mm.3D_firstorder_StandardDeviation | log.sigma.1.0.mm.3D_firstorder_Range | log.sigma.1.0.mm.3D_firstorder_Variance | log.sigma.1.0.mm.3D_firstorder_10Percentile |
|----------------------------------------|--------------------------------------------------|--------------------------------------|-----------------------------------------|---------------------------------------------|
| 3.813859576                            | 91.3239446                                       | 789.2122803                          | 8340.062857                             | -113.455011                                 |
| 3.015951665                            | 56.04811646                                      | 503.4324646                          | 3141.391359                             | -39.84200058                                |
| 2.958801966                            | 53.66080495                                      | 465.6607056                          | 2879.481988                             | -43.92416                                   |
| 3.466368001                            | 75.71082798                                      | 579.42117682                         | 5732.129473                             | -93.32169647                                |
| 3.369253391                            | 68.30882817                                      | 516.8590698                          | 4666.096005                             | -80.85931473                                |
| 3.644626748                            | 85.23417983                                      | 699.8115845                          | 7264.865411                             | -78.32839661                                |
| 3.301899027                            | 63.53238805                                      | 668.8479614                          | 4036.364331                             | -63.84212875                                |
| 3.240369751                            | 67.85616201                                      | 744.5207214                          | 4604.458723                             | -59.13802719                                |
| 3.436395296                            | 70.64743709                                      | 727.083374                           | 4991.060367                             | -73.06376648                                |
| 3.535553267                            | 76.20379328                                      | 624.0171204                          | 5807.01811                              | -79.38818436                                |
| 3.144947846                            | 55.70087594                                      | 476.7714081                          | 3102.587581                             | -58.50039253                                |
| 3.622437453                            | 84.01103321                                      | 731.1755981                          | 7057.853702                             | -75.447435                                  |
| 2.87612604                             | 60.15961936                                      | 660.4273682                          | 3619.179802                             | -37.3290451                                 |
| 3.497878769                            | 76.79818979                                      | 696.7316284                          | 5897.961955                             | -76.75453491                                |
| 3.630756098                            | 84.87458345                                      | 853.7771301                          | 7203.694915                             | -89.63718109                                |
| 3.14896713                             | 62.02246998                                      | 685.0593262                          | 3846.786783                             | -58.54527092                                |
| 3.492596262                            | 69.48245443                                      | 526.2648621                          | 4827.811474                             | -81.43564911                                |
| 2.931340567                            | 54.28151425                                      | 585.579071                           | 2946.482789                             | -40.82146225                                |
| 3.196812456                            | 58.19542945                                      | 575.6343994                          | 3386.708009                             | -64.63770065                                |
| 3.527555634                            | 76.3041604                                       | 777.7857056                          | 5822.324895                             | -71.80838928                                |
| 2.804883962                            | 47.03101684                                      | 484.3609314                          | 2211.916545                             | -41.7929823                                 |
| 3.408265636                            | 66.75939345                                      | 468.045929                           | 4456.816613                             | -72.64850922                                |
| 3.33224817                             | 65.9280746                                       | 659.5432129                          | 4346.511021                             | -70.48215179                                |
| 3.313890222                            | 63.50381974                                      | 575.6776886                          | 4032.735122                             | -60.33885345                                |
| 3.380415962                            | 71.54927034                                      | 616.651886                           | 5119.298086                             | -56.17851257                                |
| 3.719623066                            | 85.80609013                                      | 788.5217285                          | 7362.685103                             | -79.80186005                                |
| 3.608931384                            | 78.71858009                                      | 681.8282471                          | 6196.614852                             | -80.73483429                                |
| 3.261957449                            | 65.93594312                                      | 638.1359253                          | 4347.548596                             | -60.99712639                                |
| 3.432565179                            | 67.17596643                                      | 471.9039459                          | 4512.610465                             | -68.70044861                                |
| 3.167807394                            | 60.91297576                                      | 604.4478455                          | 3710.390616                             | -56.3747303                                 |
| 3.239776081                            | 67.6296191                                       | 781.1600037                          | 4573.76538                              | -56.01969032                                |
| 3.090454347                            | 60.57011931                                      | 585.6646576                          | 3668.739353                             | -63.67379379                                |
| 3.485193218                            | 74.38992648                                      | 772.0698853                          | 5533.861161                             | -78.86239777                                |
| 3.470212039                            | 76.08155684                                      | 695.2034302                          | 5788.403291                             | -75.35995865                                |
| 3.559649518                            | 77.21847164                                      | 704.4341736                          | 5962.692362                             | -72.35907211                                |
| 3.151819681                            | 62.16344772                                      | 725.4003906                          | 3864.294233                             | -53.58054428                                |
| 3.279289509                            | 71.14632394                                      | 903.4621887                          | 5061.79941                              | -61.67182159                                |
| 2.967300088                            | 62.06996655                                      | 803.6414795                          | 3852.680747                             | -44.79546738                                |
| 3.236889372                            | 63.94297117                                      | 592.3858948                          | 4088.703562                             | -63.23675537                                |
| 3.469466428                            | 68.26259235                                      | 559.7291565                          | 4659.781515                             | -78.38322983                                |
| 3.088562972                            | 57.2630031                                       | 505.9538422                          | 3279.051524                             | -67.80233536                                |
| 3.721899828                            | 79.9832272                                       | 615.997406                           | 6397.316633                             | -97.58077698                                |
| 3.374102631                            | 67.56058999                                      | 672.5678101                          | 4564.433319                             | -67.75792084                                |
| 3.682823159                            | 84.43191563                                      | 672.6637878                          | 7128.748376                             | -94.28598557                                |
| 3.403406844                            | 73.23938939                                      | 699.5954895                          | 5364.008158                             | -53.05249443                                |
| 3.444805646                            | 70.56249214                                      | 683.905304                           | 4979.065298                             | -68.01618652                                |
| 3.433426886                            | 72.22207297                                      | 685.1450806                          | 5216.027824                             | -70.89167404                                |
| 3.095008087                            | 59.63977178                                      | 520.137085                           | 3556.902378                             | -52.39938354                                |
| 3.651928541                            | 82.7589772                                       | 611.0236816                          | 6849.048307                             | -99.24051666                                |
| 3.237187323                            | 61.91967034                                      | 587.3152924                          | 3834.045575                             | -49.99206581                                |
| 3.591158458                            | 79.78933386                                      | 778.4880371                          | 6366.337798                             | -71.88231659                                |
| 3.699699584                            | 80.2037807                                       | 673.6284485                          | 6432.646439                             | -92.68198395                                |
| 3.484628114                            | 70.34313588                                      | 600.1402893                          | 4948.156766                             | -79.2978508                                 |
| 3.196173281                            | 59.73207666                                      | 536.220459                           | 3567.920982                             | -51.67994957                                |
| 3.411322832                            | 73.02485103                                      | 634.609375                           | 5332.628868                             | -64.66672592                                |
| 3.214864742                            | 61.99468962                                      | 556.2402039                          | 3843.341542                             | -59.84840355                                |
| 3.504968419                            | 72.00474872                                      | 676.0307312                          | 5184.683838                             | -78.71424255                                |
| 3.231475605                            | 63.6146575                                       | 685.315155                           | 4046.824649                             | -65.99769058                                |
| 3.399646888                            | 70.84607665                                      | 688.986035                           | 5019.166577                             | -74.48549894                                |
| 3.586227479                            | 76.18317117                                      | 700.1444397                          | 5803.875569                             | -86.0252594                                 |
| 3.203715872                            | 66.93589637                                      | 694.04776                            | 4480.414223                             | -56.45191574                                |
| 3.521203377                            | 78.61342966                                      | 883.5626526                          | 6180.071323                             | -72.74610596                                |
| 3.50935045                             | 75.72598313                                      | 753.3606262                          | 5734.424521                             | -71.52068481                                |
| 3.439806062                            | 72.91462314                                      | 772.1378784                          | 5316.542268                             | -73.71302948                                |
| 2.937729726                            | 48.19879883                                      | 364.3602295                          | 2323.124209                             | -47.47893181                                |
| 3.225247545                            | 65.97296029                                      | 746.3388367                          | 4352.431489                             | -65.51503448                                |
| 3.190628227                            | 65.42035101                                      | 601.5175781                          | 4279.822327                             | -65.5955574                                 |
| 3.463012735                            | 72.88727257                                      | 778.5483093                          | 5312.554503                             | -80.39896011                                |
| 3.499405732                            | 74.31332141                                      | 897.9830017                          | 5522.469739                             | -73.30511932                                |
| 2.976682255                            | 53.17107087                                      | 508.795639                           | 2827.162777                             | -45.33169365                                |
| 3.280734544                            | 65.08875129                                      | 553.6994629                          | 4236.545545                             | -69.84899139                                |
| 3.2305512                              | 68.5149772                                       | 710.2926636                          | 4694.302101                             | -68.46374063                                |
| 3.404406507                            | 71.12966123                                      | 629.4071045                          | 5059.428707                             | -69.21365967                                |
| 3.761927966                            | 85.79640729                                      | 724.2801514                          | 7361.023504                             | -113.5420349                                |
| 3.639632858                            | 76.48016017                                      | 598.7516785                          | 5849.2149                               | -90.00891113                                |
| 3.28002484                             | 63.69906533                                      | 556.9848328                          | 4057.570924                             | -69.85703812                                |
| 3.16936146                             | 61.08488932                                      | 667.2597351                          | 3731.363703                             | -51.01777077                                |
| 3.222263959                            | 65.04493309                                      | 529.8111572                          | 4230.84332                              | -59.19242897                                |
| 3.22174719                             | 60.38756866                                      | 527.1990662                          | 3646.658449                             | -58.74025192                                |
| 3.629987932                            | 79.506092                                        | 704.3908386                          | 6321.218666                             | -90.966217                                  |
| 3.777479153                            | 89.53011324                                      | 789.2122803                          | 8015.641177                             | -106.7697983                                |
| 3.442167161                            | 75.18364912                                      | 660.491272                           | 5652.581094                             | -91.05029449                                |
| 3.200719496                            | 64.54377049                                      | 707.8200073                          | 4165.898309                             | -59.57079773                                |
| 3.004045545                            | 49.65673897                                      | 434.7401276                          | 2465.791725                             | -54.33590012                                |
| 3.506879659                            | 74.76928404                                      | 616.8850403                          | 5590.445835                             | -87.58596039                                |
| 2.275218026                            | 34.40342635                                      | 369.3922424                          | 1183.595745                             | -27.97238903                                |
| 3.525168717                            | 75.06922358                                      | 649.4857178                          | 5635.388329                             | -92.51452332                                |
| 3.372572374                            | 68.58963378                                      | 561.3322449                          | 4704.537863                             | -55.2482235                                 |
| 3.236176725                            | 65.26712878                                      | 599.9411469                          | 4259.798099                             | -56.27899971                                |
| 3.128346813                            | 60.80667649                                      | 616.5218811                          | 3697.451905                             | -57.84521713                                |
| 2.726806705                            | 46.83105316                                      | 587.5005798                          | 2193.14754                              | -31.80939369                                |
| 3.598431936                            | 74.97919007                                      | 585.5366211                          | 5621.878943                             | -76.45846939                                |
| 3.542506174                            | 74.49597416                                      | 656.2589722                          | 5549.650167                             | -88.36997223                                |
| 3.198631779                            | 60.79875763                                      | 566.2718506                          | 3696.488929                             | -55.61681061                                |
| 3.54287117                             | 72.02200447                                      | 698.912384                           | 5187.169128                             | -86.83342896                                |
| 3.414634934                            | 79.5363432                                       | 889.5252686                          | 6326.029889                             | -64.63843689                                |
| 3.333102929                            | 64.59428225                                      | 551.254425                           | 4172.4213                               | -71.01827698                                |
| 3.422617948                            | 75.82040863                                      | 615.0048981                          | 5748.734364                             | -82.29184418                                |
| 2.910349362                            | 49.32562868                                      | 390.4213409                          | 2433.017644                             | -58.28137856                                |
| 2.977541225                            | 55.86056952                                      | 631.5718536                          | 3120.403227                             | -41.05020256                                |

| log.sigma.1.0.mm.3D_firstorder_Kurtosis | log.sigma.1.0.mm.3D_firstorder_Mean | log.sigma.1.0.mm.3D_glrIm_ShortRunLowGrayLevelEmphasis | log.sigma.1.0.mm.3D_glrIm_GrayLevelVariance |
|-----------------------------------------|-------------------------------------|--------------------------------------------------------|---------------------------------------------|
| 4.721983116                             | 6.615580654                         | 0.002801495                                            | 14.21196055                                 |
| 6.718124042                             | 13.27678438                         | 0.009435787                                            | 5.724658203                                 |
| 5.958341108                             | 11.13366042                         | 0.011786474                                            | 5.347905078                                 |
| 5.931750002                             | 3.879749729                         | 0.007197698                                            | 9.950061248                                 |
| 5.0727449                               | 7.358308663                         | 0.007158918                                            | 8.281981332                                 |
| 5.796553447                             | 14.23202871                         | 0.006512792                                            | 12.46883855                                 |
| 5.251085964                             | 11.12257839                         | 0.004950621                                            | 7.184812467                                 |
| 6.751842128                             | 12.40824706                         | 0.003909416                                            | 8.399001323                                 |
| 5.440732816                             | 11.00389373                         | 0.004030903                                            | 8.676327618                                 |
| 5.434286873                             | 14.60732662                         | 0.005601462                                            | 9.960944916                                 |
| 5.063534629                             | 9.051223742                         | 0.009093413                                            | 5.467699011                                 |
| 6.443151017                             | 16.21983933                         | 0.004378194                                            | 12.23059715                                 |
| 11.01226171                             | 6.902340351                         | 0.00503163                                             | 6.961709532                                 |
| 6.0252615                               | 10.04392542                         | 0.00408611                                             | 10.38166025                                 |
| 5.708454314                             | 11.3455571                          | 0.003713838                                            | 12.58370408                                 |
| 7.85665108                              | 6.980378236                         | 0.004838758                                            | 7.081222904                                 |
| 4.013802607                             | 8.90593095                          | 0.013277974                                            | 8.366286381                                 |
| 8.869760699                             | 10.85209221                         | 0.005637695                                            | 5.488352072                                 |
| 5.347395636                             | 8.08806779                          | 0.005557613                                            | 6.006956167                                 |
| 6.394488753                             | 12.99666299                         | 0.004856255                                            | 10.17550223                                 |
| 6.133054868                             | 9.228473857                         | 0.006228706                                            | 4.197958923                                 |
| 4.416443212                             | 11.95456798                         | 0.011983272                                            | 7.693763473                                 |
| 6.294214794                             | 9.312943585                         | 0.004753358                                            | 7.638111816                                 |
| 5.528093698                             | 12.12553134                         | 0.005362151                                            | 7.131133328                                 |
| 6.557253597                             | 17.66246451                         | 0.006097892                                            | 9.038214054                                 |
| 5.047716348                             | 20.30785629                         | 0.003358155                                            | 12.65983239                                 |
| 4.795584353                             | 13.17436737                         | 0.005007993                                            | 10.71408767                                 |
| 7.282476184                             | 7.82542358                          | 0.004474293                                            | 7.756554631                                 |
| 3.743179066                             | 12.54337107                         | 0.010736904                                            | 7.664313199                                 |
| 7.39828201                              | 11.25217401                         | 0.00490651                                             | 6.665866687                                 |
| 7.899398789                             | 11.752787                           | 0.003748933                                            | 8.393534652                                 |
| 7.068763391                             | 3.386050209                         | 0.004929043                                            | 6.667779815                                 |
| 5.853251081                             | 8.648576623                         | 0.004814625                                            | 9.786853068                                 |
| 6.20125381                              | 10.59939142                         | 0.007977708                                            | 10.29923626                                 |
| 4.914695353                             | 19.18001157                         | 0.006838061                                            | 10.32376511                                 |
| 7.224984968                             | 10.26756404                         | 0.005326823                                            | 7.030207431                                 |
| 9.351526181                             | 5.676811627                         | 0.002481734                                            | 9.184693161                                 |
| 10.02487828                             | 6.564874626                         | 0.002491462                                            | 7.450497729                                 |
| 7.705336878                             | 5.247795164                         | 0.004973516                                            | 7.23218472                                  |
| 3.942262926                             | 6.916644913                         | 0.009515549                                            | 7.989034267                                 |
| 5.45245459                              | 4.123710803                         | 0.010152237                                            | 5.982719611                                 |
| 3.278031283                             | 6.227609665                         | 0.008148458                                            | 10.69741506                                 |
| 5.434755643                             | 10.78919737                         | 0.004686678                                            | 7.968003393                                 |
| 5.226103712                             | 8.013682754                         | 0.005325357                                            | 12.25323596                                 |
| 7.848807702                             | 18.61821914                         | 0.004451089                                            | 9.425739357                                 |
| 5.089758469                             | 13.98664428                         | 0.007655972                                            | 8.666218143                                 |
| 5.940726539                             | 11.43726273                         | 0.005534043                                            | 9.21459968                                  |
| 7.023135209                             | 11.3602766                          | 0.012436096                                            | 6.36655206                                  |
| 4.355835234                             | 13.76907186                         | 0.012139432                                            | 11.76739087                                 |
| 6.464157948                             | 16.98031256                         | 0.004274223                                            | 6.865784113                                 |
| 5.774787809                             | 17.26753595                         | 0.004463316                                            | 10.98338654                                 |
| 4.031045641                             | 11.12162077                         | 0.005752514                                            | 10.86039605                                 |
| 4.27499463                              | 9.82998458                          | 0.006576715                                            | 8.506692872                                 |
| 5.871221168                             | 14.26284005                         | 0.01002856                                             | 6.292903967                                 |
| 6.201681529                             | 15.27776757                         | 0.006862399                                            | 9.295686935                                 |
| 6.117566113                             | 8.95421063                          | 0.009780615                                            | 6.789042943                                 |
| 4.673440424                             | 12.57697274                         | 0.005504792                                            | 8.973828361                                 |
| 6.733625146                             | 3.880818308                         | 0.004172825                                            | 7.301533411                                 |
| 6.135139734                             | 7.690994579                         | 0.004577762                                            | 8.796273392                                 |
| 4.601840441                             | 4.918883209                         | 0.004128419                                            | 10.08538698                                 |
| 7.291668664                             | 11.68691788                         | 0.004400193                                            | 8.28023866                                  |
| 7.286566731                             | 12.58497407                         | 0.003260894                                            | 10.78400741                                 |
| 5.453647168                             | 15.57313969                         | 0.003079914                                            | 10.05915682                                 |
| 6.429491161                             | 8.103798631                         | 0.004386649                                            | 9.335764165                                 |
| 4.912710032                             | 10.92390792                         | 0.01323903                                             | 4.15390683                                  |
| 7.453225043                             | 6.985802246                         | 0.00425058                                             | 7.840469475                                 |
| 7.162283737                             | 3.054587415                         | 0.006597004                                            | 7.710127043                                 |
| 5.575042779                             | 6.878820696                         | 0.003589715                                            | 9.314808442                                 |
| 6.455961968                             | 11.7829015                          | 0.003018072                                            | 9.532881402                                 |
| 7.760025505                             | 8.86948222                          | 0.00606902                                             | 5.151183607                                 |
| 5.709386055                             | 7.281997409                         | 0.009383258                                            | 7.522417532                                 |
| 7.906143886                             | 14.46899715                         | 0.005556328                                            | 8.590355566                                 |
| 5.368941174                             | 11.49559434                         | 0.005585518                                            | 9.06612885                                  |
| 3.992734302                             | 4.503790432                         | 0.006958393                                            | 12.42615794                                 |
| 3.759309584                             | 7.623419017                         | 0.008994984                                            | 9.984848072                                 |
| 5.128782592                             | 6.780572189                         | 0.008244997                                            | 7.11233315                                  |
| 7.202826845                             | 12.84166683                         | 0.005974571                                            | 6.625926791                                 |
| 7.389794591                             | 8.178748855                         | 0.009190213                                            | 7.470994074                                 |
| 6.042645526                             | 8.896880647                         | 0.00671949                                             | 6.433093296                                 |
| 4.85765532                              | 5.003588489                         | 0.006832867                                            | 10.7925136                                  |
| 5.008690863                             | 7.925972128                         | 0.002814356                                            | 13.72806299                                 |
| 5.556653357                             | 4.061677992                         | 0.009027099                                            | 9.920011877                                 |
| 7.451678816                             | 8.041079826                         | 0.004166969                                            | 7.665365548                                 |
| 4.588365766                             | 8.100160451                         | 0.007966202                                            | 4.378322159                                 |
| 4.714115915                             | 7.707350664                         | 0.005848946                                            | 9.708650639                                 |
| 11.58376313                             | 5.26548749                          | 0.010166124                                            | 2.452107676                                 |
| 4.939558301                             | 3.229708563                         | 0.006771723                                            | 9.883551119                                 |
| 5.347970416                             | 18.43146595                         | 0.006300299                                            | 8.341867146                                 |
| 7.493308215                             | 11.99241682                         | 0.005152106                                            | 7.579195109                                 |
| 7.670052618                             | 9.712199118                         | 0.005006183                                            | 6.724005305                                 |
| 8.948063616                             | 11.64901901                         | 0.004525107                                            | 4.171863857                                 |
| 4.042308425                             | 16.03494346                         | 0.005569578                                            | 9.493563178                                 |
| 4.606536241                             | 7.298314473                         | 0.007118572                                            | 9.540807928                                 |
| 5.664306299                             | 12.5546564                          | 0.006116185                                            | 6.587945317                                 |
| 4.197289271                             | 6.742828593                         | 0.005506111                                            | 8.844349692                                 |
| 7.915745772                             | 12.07876664                         | 0.002268473                                            | 11.47688371                                 |
| 4.90314698                              | 7.033174426                         | 0.008070518                                            | 7.32750236                                  |
| 6.482080894                             | 2.577493142                         | 0.005588305                                            | 10.19238549                                 |
| 5.092707714                             | 3.486161019                         | 0.011135232                                            | 4.459443735                                 |
| 7.428321628                             | 11.92275527                         | 0.003593124                                            | 5.814929388                                 |



| log.sigma.1.0.mm.3D_glrIm_LowGrayLevelRunEmphasis | log.sigma.1.0.mm.3D_glrIm_GrayLevelNonUniformityNormalized | log.sigma.1.0.mm.3D_glrIm_RunVariance | log.sigma.1.0.mm.3D_glrIm_GrayLevelNonUniformity |
|---------------------------------------------------|------------------------------------------------------------|---------------------------------------|--------------------------------------------------|
| 0.002928617                                       | 0.089210666                                                | 0.101244042                           | 174.1840814                                      |
| 0.010150314                                       | 0.156985534                                                | 0.201079319                           | 126.5832473                                      |
| 0.012870402                                       | 0.157766989                                                | 0.320238685                           | 200.7990617                                      |
| 0.007537798                                       | 0.113533594                                                | 0.148289331                           | 98.83239221                                      |
| 0.007600573                                       | 0.120367715                                                | 0.155177214                           | 252.9097014                                      |
| 0.006746267                                       | 0.101459671                                                | 0.09156633                            | 61.85808939                                      |
| 0.005361237                                       | 0.124071226                                                | 0.188186241                           | 614.7048271                                      |
| 0.004266701                                       | 0.138407002                                                | 0.215168227                           | 608.7906416                                      |
| 0.004302678                                       | 0.114826883                                                | 0.139052028                           | 467.6500989                                      |
| 0.005855895                                       | 0.10721477                                                 | 0.107778751                           | 105.0216885                                      |
| 0.009698403                                       | 0.135805067                                                | 0.143639243                           | 182.4597357                                      |
| 0.004583026                                       | 0.103707019                                                | 0.117989765                           | 217.3886967                                      |
| 0.005507795                                       | 0.182468896                                                | 0.300700551                           | 279.885872                                       |
| 0.004347174                                       | 0.113749957                                                | 0.151420892                           | 173.8548872                                      |
| 0.003919954                                       | 0.104664376                                                | 0.127047116                           | 187.4087109                                      |
| 0.00527265                                        | 0.143623598                                                | 0.217797458                           | 538.554573                                       |
| 0.013892686                                       | 0.104777787                                                | 0.10645891                            | 114.1760338                                      |
| 0.006157169                                       | 0.166487249                                                | 0.242387686                           | 173.5662208                                      |
| 0.005936601                                       | 0.13268884                                                 | 0.143528429                           | 153.2634361                                      |
| 0.005107793                                       | 0.109779208                                                | 0.126853459                           | 515.7521991                                      |
| 0.007036223                                       | 0.174274726                                                | 0.313343018                           | 432.9632866                                      |
| 0.012468392                                       | 0.112993303                                                | 0.105520577                           | 111.1472485                                      |
| 0.005039103                                       | 0.122966919                                                | 0.147807277                           | 112.2384928                                      |
| 0.005739137                                       | 0.123972053                                                | 0.14915273                            | 292.036267                                       |
| 0.006429709                                       | 0.12349582                                                 | 0.141836841                           | 140.0003564                                      |
| 0.003537623                                       | 0.097000636                                                | 0.114731466                           | 209.850042                                       |
| 0.00530137                                        | 0.102388758                                                | 0.132137008                           | 298.5694512                                      |
| 0.004789818                                       | 0.132830079                                                | 0.173174463                           | 322.5355882                                      |
| 0.011180343                                       | 0.111096844                                                | 0.08614404                            | 45.89282161                                      |
| 0.005246653                                       | 0.140937471                                                | 0.155014198                           | 256.1435672                                      |
| 0.004070644                                       | 0.13631919                                                 | 0.233629882                           | 556.4375961                                      |
| 0.00536302                                        | 0.148759561                                                | 0.215757873                           | 263.8393704                                      |
| 0.005158869                                       | 0.113195451                                                | 0.165968363                           | 323.7783524                                      |
| 0.008368321                                       | 0.115626871                                                | 0.157638579                           | 240.9392406                                      |
| 0.007210365                                       | 0.106250481                                                | 0.129202774                           | 422.1286573                                      |
| 0.005807865                                       | 0.144352327                                                | 0.212905859                           | 372.1443266                                      |
| 0.002685494                                       | 0.13630108                                                 | 0.190339889                           | 441.344386                                       |
| 0.002818417                                       | 0.170691799                                                | 0.335255189                           | 714.5715182                                      |
| 0.005250475                                       | 0.130903277                                                | 0.136879628                           | 144.1964257                                      |
| 0.010077154                                       | 0.107729477                                                | 0.12881389                            | 707.6168398                                      |
| 0.010969392                                       | 0.147214559                                                | 0.218177623                           | 327.1945066                                      |
| 0.008515278                                       | 0.088369539                                                | 0.08334566                            | 317.5653497                                      |
| 0.0050046                                         | 0.119215957                                                | 0.14425317                            | 388.8915319                                      |
| 0.005553303                                       | 0.097984969                                                | 0.108510004                           | 223.0545659                                      |
| 0.004684812                                       | 0.120369503                                                | 0.132070685                           | 137.9209164                                      |
| 0.008128195                                       | 0.115461567                                                | 0.13788657                            | 284.4343805                                      |
| 0.005914285                                       | 0.118220739                                                | 0.156512037                           | 479.7045438                                      |
| 0.13034344                                        | 0.148390807                                                | 0.155239256                           | 114.3570858                                      |
| 0.012512499                                       | 0.099654725                                                | 0.097807386                           | 78.25897857                                      |
| 0.004584094                                       | 0.131169762                                                | 0.169992405                           | 155.9957342                                      |
| 0.004697317                                       | 0.10515726                                                 | 0.117156687                           | 245.5212829                                      |
| 0.006019021                                       | 0.092515405                                                | 0.088260231                           | 288.5473588                                      |
| 0.006942184                                       | 0.109086289                                                | 0.114189192                           | 447.6810462                                      |
| 0.010646676                                       | 0.135235088                                                | 0.151013014                           | 132.1731289                                      |
| 0.007212526                                       | 0.121912926                                                | 0.137040803                           | 145.3164612                                      |
| 0.010300974                                       | 0.132906146                                                | 0.14851842                            | 230.1365626                                      |
| 0.005834857                                       | 0.107420263                                                | 0.125328289                           | 392.4614814                                      |
| 0.004523456                                       | 0.13434673                                                 | 0.18119107                            | 404.6860223                                      |
| 0.004836893                                       | 0.120683474                                                | 0.131218378                           | 179.2156051                                      |
| 0.00440713                                        | 0.102448874                                                | 0.143330579                           | 839.832789                                       |
| 0.004758475                                       | 0.141301926                                                | 0.218443416                           | 214.6208859                                      |
| 0.003453812                                       | 0.111637528                                                | 0.14455971                            | 266.9933124                                      |
| 0.003301958                                       | 0.111736024                                                | 0.154010802                           | 576.4804147                                      |
| 0.004673866                                       | 0.118060147                                                | 0.153990663                           | 801.5848584                                      |
| 0.014202711                                       | 0.154728975                                                | 0.162420234                           | 107.4288453                                      |
| 0.004601212                                       | 0.138239039                                                | 0.192676558                           | 463.6564889                                      |
| 0.007058263                                       | 0.140391275                                                | 0.202081705                           | 158.7409546                                      |
| 0.0038447                                         | 0.115025763                                                | 0.146584773                           | 641.3362554                                      |
| 0.003192129                                       | 0.111667702                                                | 0.123037812                           | 592.9930518                                      |
| 0.006628608                                       | 0.156869276                                                | 0.204238671                           | 390.5227869                                      |
| 0.009936311                                       | 0.129128401                                                | 0.159099484                           | 148.2366086                                      |
| 0.005964463                                       | 0.140852633                                                | 0.218103108                           | 520.3877084                                      |
| 0.006013025                                       | 0.119922643                                                | 0.183406749                           | 238.8177608                                      |
| 0.007279831                                       | 0.089437809                                                | 0.096918185                           | 185.9153749                                      |
| 0.009396997                                       | 0.095553266                                                | 0.101488621                           | 274.7661409                                      |
| 0.008755828                                       | 0.127135195                                                | 0.144085874                           | 152.1149659                                      |
| 0.006447847                                       | 0.141590488                                                | 0.167974398                           | 298.2407643                                      |
| 0.009633988                                       | 0.13616791                                                 | 0.147572839                           | 115.8001989                                      |
| 0.00715183                                        | 0.131803855                                                | 0.141256826                           | 200.7715867                                      |
| 0.007166884                                       | 0.100326361                                                | 0.113341706                           | 213.6712881                                      |
| 0.00294251                                        | 0.092334888                                                | 0.102383078                           | 168.8106083                                      |
| 0.009492754                                       | 0.118376817                                                | 0.156317548                           | 188.8373261                                      |
| 0.004537916                                       | 0.140446638                                                | 0.21942987                            | 394.4592465                                      |
| 0.008650263                                       | 0.14719914                                                 | 0.167429788                           | 396.5902983                                      |
| 0.006217951                                       | 0.109437412                                                | 0.142628024                           | 238.7270834                                      |
| 0.011750209                                       | 0.24043149                                                 | 0.493595226                           | 279.5468089                                      |
| 0.00714377                                        | 0.108129487                                                | 0.150689157                           | 230.5143487                                      |
| 0.006752551                                       | 0.120729709                                                | 0.17515962                            | 291.3968888                                      |
| 0.00549064                                        | 0.134611223                                                | 0.158450699                           | 174.8425481                                      |
| 0.005398558                                       | 0.14465643                                                 | 0.198511171                           | 253.6276352                                      |
| 0.00504928                                        | 0.187109503                                                | 0.301254852                           | 200.5584652                                      |
| 0.005831142                                       | 0.098148301                                                | 0.096904105                           | 215.6818229                                      |
| 0.007491311                                       | 0.10578854                                                 | 0.119754729                           | 497.6163435                                      |
| 0.006597732                                       | 0.135977715                                                | 0.176177323                           | 393.2870924                                      |
| 0.005814772                                       | 0.101755466                                                | 0.108036805                           | 404.5084492                                      |
| 0.002457564                                       | 0.124521232                                                | 0.21178024                            | 368.4602103                                      |
| 0.008577539                                       | 0.123140192                                                | 0.139286294                           | 310.1535853                                      |
| 0.005898987                                       | 0.120904357                                                | 0.168018796                           | 112.0559915                                      |
| 0.012107112                                       | 0.158728749                                                | 0.221179796                           | 113.2634722                                      |
| 0.004001135                                       | 0.16276341                                                 | 0.256862976                           | 792.0769586                                      |

| log.sigma.1.0.mm.3D_glrIm_LongRunEmphasis | log.sigma.1.0.mm.3D_glrIm_ShortRunHighGrayLevelEmphasis | log.sigma.1.0.mm.3D_glrIm_RunLengthNonUniformity | log.sigma.1.0.mm.3D_glrIm_ShortRunEmphasis |
|-------------------------------------------|---------------------------------------------------------|--------------------------------------------------|--------------------------------------------|
| 1.2836252                                 | 457.3957092                                             | 1669.701584                                      | 0.940187896                                |
| 1.548069603                               | 134.5494112                                             | 615.6923438                                      | 0.896301353                                |
| 1.783873884                               | 109.9619223                                             | 920.4366225                                      | 0.874680439                                |
| 1.410980357                               | 232.51721                                               | 704.2766029                                      | 0.918369527                                |
| 1.426866876                               | 179.7136741                                             | 1685.867042                                      | 0.915641715                                |
| 1.264660038                               | 255.6138286                                             | 523.870575                                       | 0.942093106                                |
| 1.49134907                                | 209.9464157                                             | 3918.966883                                      | 0.909906466                                |
| 1.565406037                               | 266.9529909                                             | 3370.414675                                      | 0.897713032                                |
| 1.386439784                               | 271.2443032                                             | 3324.081228                                      | 0.922091164                                |
| 1.306507819                               | 250.2752768                                             | 826.3465721                                      | 0.934963905                                |
| 1.405202747                               | 133.0255396                                             | 1083.200097                                      | 0.917342652                                |
| 1.328281029                               | 317.1864584                                             | 1756.7446                                        | 0.932424399                                |
| 1.787853718                               | 249.9342331                                             | 1085.852168                                      | 0.866719656                                |
| 1.415289883                               | 302.2772918                                             | 1235.117554                                      | 0.918247653                                |
| 1.356857444                               | 343.3555171                                             | 1478.619846                                      | 0.926634764                                |
| 1.583170441                               | 227.8523272                                             | 2841.133617                                      | 0.893233456                                |
| 1.308016433                               | 117.5538424                                             | 915.8942819                                      | 0.933641019                                |
| 1.644776174                               | 201.3965986                                             | 772.7484967                                      | 0.884711581                                |
| 1.407685482                               | 205.6425835                                             | 928.4533348                                      | 0.916322737                                |
| 1.35248108                                | 277.9316969                                             | 3893.937443                                      | 0.928149965                                |
| 1.799604114                               | 147.7551352                                             | 1766.613214                                      | 0.868338769                                |
| 1.310034467                               | 139.7290672                                             | 823.4810554                                      | 0.932102837                                |
| 1.408603782                               | 267.7444123                                             | 738.4976232                                      | 0.918609858                                |
| 1.413776799                               | 212.8951272                                             | 1899.530842                                      | 0.917413788                                |
| 1.404375798                               | 249.9139258                                             | 911.6162828                                      | 0.916593581                                |
| 1.314713238                               | 361.6837423                                             | 1830.899114                                      | 0.93611288                                 |
| 1.362392814                               | 248.0728014                                             | 2411.40833                                       | 0.927281391                                |
| 1.468872846                               | 263.2874742                                             | 1922.112876                                      | 0.91030321                                 |
| 1.257967129                               | 142.5440665                                             | 354.3438072                                      | 0.941426244                                |
| 1.434663855                               | 236.4275612                                             | 1447.477574                                      | 0.912693705                                |
| 1.595284447                               | 297.0335595                                             | 3125.378217                                      | 0.897147231                                |
| 1.579036191                               | 222.5885242                                             | 1344.274543                                      | 0.893423609                                |
| 1.443198612                               | 239.1182326                                             | 2299.201898                                      | 0.915910295                                |
| 1.431253342                               | 213.23592                                               | 1671.913965                                      | 0.915548951                                |
| 1.358689665                               | 198.2068405                                             | 3283.853481                                      | 0.927130571                                |
| 1.568253533                               | 205.5036439                                             | 1963.829808                                      | 0.895471025                                |
| 1.512956131                               | 434.103572                                              | 2519.311504                                      | 0.903607121                                |
| 1.859168862                               | 377.9431987                                             | 2913.975448                                      | 0.860293421                                |
| 1.384982102                               | 262.1501874                                             | 897.3761244                                      | 0.921437717                                |
| 1.355291834                               | 135.9510962                                             | 5443.158004                                      | 0.92803699                                 |
| 1.583561827                               | 125.744385                                              | 1683.978097                                      | 0.893148                                   |
| 1.241967285                               | 164.2505412                                             | 3122.652189                                      | 0.946482296                                |
| 1.400311738                               | 239.4433786                                             | 2646.040467                                      | 0.919671199                                |
| 1.303735763                               | 275.1877275                                             | 1928.422061                                      | 0.936625197                                |
| 1.377089552                               | 314.2067333                                             | 933.0629501                                      | 0.921502279                                |
| 1.381017351                               | 165.7919327                                             | 2016.788869                                      | 0.923389429                                |
| 1.421694965                               | 213.9466927                                             | 3279.971971                                      | 0.918439854                                |
| 1.434242215                               | 135.2811904                                             | 614.0481269                                      | 0.912853526                                |
| 1.274122407                               | 170.4924677                                             | 675.4593459                                      | 0.942290854                                |
| 1.465723237                               | 274.4341355                                             | 940.2692756                                      | 0.909447331                                |
| 1.328605555                               | 285.3099477                                             | 1953.539119                                      | 0.931880141                                |
| 1.256862731                               | 220.3092454                                             | 2686.582939                                      | 0.943223894                                |
| 1.323804679                               | 187.1363348                                             | 3433.297547                                      | 0.931863802                                |
| 1.429928547                               | 138.3068777                                             | 777.6324232                                      | 0.912152017                                |
| 1.383081801                               | 219.6117313                                             | 971.5107064                                      | 0.921768699                                |
| 1.417862254                               | 156.6392312                                             | 1386.709011                                      | 0.915029951                                |
| 1.352584577                               | 216.1925603                                             | 3020.530409                                      | 0.927161122                                |
| 1.500547903                               | 256.3160454                                             | 2339.420627                                      | 0.903005847                                |
| 1.364523627                               | 268.1419036                                             | 1224.727969                                      | 0.92612648                                 |
| 1.384551803                               | 267.3348077                                             | 6743.542342                                      | 0.925129002                                |
| 1.573311979                               | 265.5366715                                             | 1162.769821                                      | 0.897216933                                |
| 1.3918657                                 | 378.4647593                                             | 1954.852383                                      | 0.922821584                                |
| 1.41418007                                | 345.9411637                                             | 4187.816786                                      | 0.919994473                                |
| 1.416336595                               | 267.8260503                                             | 5497.060604                                      | 0.918972838                                |
| 1.460485846                               | 93.20503682                                             | 546.2774295                                      | 0.907686475                                |
| 1.520369111                               | 260.3108072                                             | 2597.843318                                      | 0.901898729                                |
| 1.533779785                               | 198.0815848                                             | 876.086505                                       | 0.901936124                                |
| 1.404430935                               | 297.7691752                                             | 4517.578357                                      | 0.919394171                                |
| 1.340530372                               | 379.1037928                                             | 4431.383415                                      | 0.930735846                                |
| 1.561249874                               | 175.4378025                                             | 1883.979418                                      | 0.893005627                                |
| 1.44208196                                | 155.0487939                                             | 914.1559442                                      | 0.912352887                                |
| 1.568842324                               | 240.7532162                                             | 2831.59376                                       | 0.897749085                                |
| 1.49501812                                | 210.8980393                                             | 1561.101493                                      | 0.906405884                                |
| 1.278520642                               | 213.420371                                              | 1775.053742                                      | 0.939776764                                |
| 1.287723853                               | 163.0582189                                             | 2450.882695                                      | 0.938912964                                |
| 1.404233874                               | 154.7965489                                             | 965.5758638                                      | 0.917746327                                |
| 1.463722331                               | 184.6683091                                             | 1662.192563                                      | 0.909150789                                |
| 1.41866385                                | 180.4670042                                             | 680.6143926                                      | 0.914562865                                |
| 1.398799055                               | 181.2420377                                             | 1231.010304                                      | 0.918385439                                |
| 1.320311094                               | 211.3407961                                             | 1787.285739                                      | 0.932959596                                |
| 1.287327853                               | 458.8378467                                             | 1560.38417                                       | 0.939384314                                |
| 1.430445114                               | 178.8232102                                             | 1279.724522                                      | 0.915336974                                |
| 1.578025654                               | 260.1302525                                             | 2144.176645                                      | 0.895937136                                |
| 1.470105333                               | 130.0054089                                             | 2111.313642                                      | 0.906416248                                |
| 1.395250441                               | 210.3502005                                             | 1776.094299                                      | 0.92098112                                 |
| 2.257953933                               | 93.67168973                                             | 723.0212878                                      | 0.814224773                                |
| 1.405862616                               | 205.4107851                                             | 1741.995721                                      | 0.921980007                                |
| 1.467468901                               | 193.139531                                              | 1920.79562                                       | 0.912182002                                |
| 1.431433661                               | 240.8592694                                             | 1043.797806                                      | 0.915985729                                |
| 1.535901859                               | 232.315643                                              | 1352.231763                                      | 0.899892618                                |
| 1.784525789                               | 226.0989867                                             | 761.7669541                                      | 0.86826503                                 |
| 1.272729207                               | 224.3648093                                             | 1886.96249                                       | 0.941880475                                |
| 1.334461382                               | 185.0876143                                             | 3927.101324                                      | 0.931042657                                |
| 1.479734556                               | 184.0190116                                             | 2274.006384                                      | 0.907665034                                |
| 1.307322504                               | 211.644512                                              | 3350.925149                                      | 0.93476325                                 |
| 1.551924472                               | 486.2266289                                             | 2288.193385                                      | 0.901023454                                |
| 1.391837867                               | 156.4960319                                             | 2043.193186                                      | 0.919874306                                |
| 1.446428664                               | 259.6582456                                             | 741.1225837                                      | 0.914329432                                |
| 1.592454972                               | 103.9727892                                             | 538.9822381                                      | 0.891559503                                |
| 1.667236646                               | 260.3857037                                             | 3600.376471                                      | 0.883995991                                |

| log.sigma.1.0.mm.3D_glrIm_LongRunHighGrayLevelEmphasis | log.sigma.1.0.mm.3D_glrIm_RunPercentage | log.sigma.1.0.mm.3D_glrIm_LongRunLowGrayLevelEmphasis | log.sigma.1.0.mm.3D_glrIm_RunEntropy |
|--------------------------------------------------------|-----------------------------------------|-------------------------------------------------------|--------------------------------------|
| 625.9197736                                            | 0.91999565                              | 0.003530568                                           | 4.266896091                          |
| 231.5286324                                            | 0.862196627                             | 0.013948496                                           | 3.72778624                           |
| 219.7964672                                            | 0.828853676                             | 0.019609414                                           | 3.814720114                          |
| 359.4815657                                            | 0.890717266                             | 0.009238767                                           | 4.043332808                          |
| 284.2113065                                            | 0.8870842                               | 0.009811922                                           | 3.976776633                          |
| 339.9703905                                            | 0.923659674                             | 0.00781099                                            | 4.068428287                          |
| 342.1403725                                            | 0.876482039                             | 0.007596911                                           | 3.957640252                          |
| 462.7431802                                            | 0.860896934                             | 0.00623824                                            | 3.983760801                          |
| 409.8912137                                            | 0.895766354                             | 0.005647135                                           | 4.007391075                          |
| 350.4956729                                            | 0.913676808                             | 0.007054308                                           | 4.010074465                          |
| 205.1180563                                            | 0.890838604                             | 0.012643076                                           | 3.722543117                          |
| 453.2335983                                            | 0.909294177                             | 0.005573546                                           | 4.129468358                          |
| 512.6626695                                            | 0.821062173                             | 0.008310815                                           | 3.798789754                          |
| 466.8302654                                            | 0.889924287                             | 0.0056643                                             | 4.09145076                           |
| 502.9143482                                            | 0.902256514                             | 0.004918283                                           | 4.17364311                           |
| 404.4955898                                            | 0.85654268                              | 0.007625214                                           | 3.900773467                          |
| 164.3842742                                            | 0.912575699                             | 0.016755842                                           | 3.966903306                          |
| 374.9869641                                            | 0.845155655                             | 0.009047665                                           | 3.724558737                          |
| 318.002528                                             | 0.889771246                             | 0.007773244                                           | 3.781079957                          |
| 404.2387808                                            | 0.90354654                              | 0.006336117                                           | 4.067229544                          |
| 303.4897404                                            | 0.821199634                             | 0.011913818                                           | 3.700242967                          |
| 197.4079246                                            | 0.911527768                             | 0.014665434                                           | 3.890666583                          |
| 411.3316744                                            | 0.891150841                             | 0.006473351                                           | 3.909307548                          |
| 325.7337511                                            | 0.889744558                             | 0.00762624                                            | 3.90843966                           |
| 378.4625677                                            | 0.890386126                             | 0.008030531                                           | 3.970448468                          |
| 502.9927813                                            | 0.91314089                              | 0.004416124                                           | 4.2080883                            |
| 362.7565412                                            | 0.901853482                             | 0.006753013                                           | 4.149961519                          |
| 426.7742423                                            | 0.878933883                             | 0.006434183                                           | 3.912167531                          |
| 188.7141971                                            | 0.924109448                             | 0.013129715                                           | 3.844266554                          |
| 374.5198108                                            | 0.884577934                             | 0.006935582                                           | 3.786188456                          |
| 525.8551734                                            | 0.857567821                             | 0.005924523                                           | 3.992159275                          |
| 396.8034462                                            | 0.857010075                             | 0.007706368                                           | 3.837224771                          |
| 373.6081979                                            | 0.885556376                             | 0.006965974                                           | 4.103669286                          |
| 331.055337                                             | 0.886513912                             | 0.010353442                                           | 4.085805739                          |
| 288.587095                                             | 0.90204709                              | 0.009031941                                           | 4.102712779                          |
| 357.0900159                                            | 0.859363378                             | 0.008407222                                           | 3.893322546                          |
| 727.1107185                                            | 0.869968784                             | 0.003767182                                           | 3.980113435                          |
| 810.0316564                                            | 0.81078503                              | 0.00482477                                            | 3.947800714                          |
| 398.8070937                                            | 0.895434647                             | 0.006598816                                           | 3.799184539                          |
| 197.0457488                                            | 0.903375304                             | 0.01283202                                            | 4.000788546                          |
| 224.5272415                                            | 0.856503173                             | 0.01535118                                            | 3.834783007                          |
| 214.0417871                                            | 0.9292435                               | 0.010164868                                           | 4.12859515                           |
| 366.6419373                                            | 0.892838342                             | 0.006580588                                           | 3.954830093                          |
| 385.0412392                                            | 0.91488375                              | 0.006639098                                           | 4.163475904                          |
| 470.7878874                                            | 0.896472854                             | 0.005807707                                           | 3.964288396                          |
| 244.9165501                                            | 0.89726776                              | 0.010472224                                           | 4.007802683                          |
| 328.8676971                                            | 0.889319799                             | 0.007861859                                           | 4.037919701                          |
| 213.8182377                                            | 0.884659543                             | 0.016057163                                           | 3.707412273                          |
| 231.3054205                                            | 0.922534575                             | 0.014245121                                           | 4.078979604                          |
| 441.7922136                                            | 0.87943787                              | 0.006171278                                           | 3.864990663                          |
| 405.3039526                                            | 0.908734317                             | 0.005825061                                           | 4.103356426                          |
| 293.6967449                                            | 0.925199096                             | 0.007221311                                           | 4.128539244                          |
| 266.221818                                             | 0.909472177                             | 0.00866424                                            | 3.990226046                          |
| 215.8945825                                            | 0.885033445                             | 0.013662495                                           | 3.802565542                          |
| 326.8374952                                            | 0.896124928                             | 0.008922703                                           | 3.97813826                           |
| 243.1266349                                            | 0.887889546                             | 0.012845956                                           | 3.814876892                          |
| 316.273721                                             | 0.903071218                             | 0.00742435                                            | 4.038894234                          |
| 426.7865719                                            | 0.870956978                             | 0.006324118                                           | 3.916333667                          |
| 397.4204977                                            | 0.900905527                             | 0.006107833                                           | 3.947086097                          |
| 397.2915541                                            | 0.897874062                             | 0.005834816                                           | 4.149286759                          |
| 462.738312                                             | 0.859700322                             | 0.006758291                                           | 3.942422269                          |
| 571.3406378                                            | 0.895620859                             | 0.004431733                                           | 4.096546627                          |
| 529.1301994                                            | 0.8910799                               | 0.004449716                                           | 4.107920439                          |
| 414.0276177                                            | 0.890503436                             | 0.006138604                                           | 4.041774422                          |
| 150.2151296                                            | 0.878675755                             | 0.018978357                                           | 3.560378975                          |
| 438.864854                                             | 0.868262757                             | 0.006451381                                           | 3.929648177                          |
| 338.8521414                                            | 0.866918358                             | 0.009542564                                           | 3.888962505                          |
| 456.6965447                                            | 0.891950769                             | 0.005119309                                           | 4.056727702                          |
| 547.810703                                             | 0.906568078                             | 0.004045478                                           | 4.024081552                          |
| 306.5600942                                            | 0.858868185                             | 0.009561371                                           | 3.708282289                          |
| 245.7695523                                            | 0.883579085                             | 0.012693265                                           | 3.898230382                          |
| 415.1309357                                            | 0.860928815                             | 0.008222955                                           | 3.975254313                          |
| 345.5841141                                            | 0.873662538                             | 0.008269918                                           | 4.07305229                           |
| 291.2361146                                            | 0.920148466                             | 0.008747406                                           | 4.210938995                          |
| 223.1616225                                            | 0.918384394                             | 0.011268743                                           | 4.097743885                          |
| 238.9966902                                            | 0.891379113                             | 0.011240611                                           | 3.858930429                          |
| 294.8784466                                            | 0.878932837                             | 0.008859933                                           | 3.81584641                           |
| 281.0841356                                            | 0.887506022                             | 0.011801182                                           | 3.823455072                          |
| 277.0412204                                            | 0.89216349                              | 0.009251299                                           | 3.797624818                          |
| 298.026186                                             | 0.910481139                             | 0.008741716                                           | 4.128984548                          |
| 629.682189                                             | 0.919054801                             | 0.003549366                                           | 4.235756812                          |
| 280.3668105                                            | 0.886475392                             | 0.011828826                                           | 4.05577066                           |
| 456.282506                                             | 0.858813563                             | 0.006593868                                           | 3.945766809                          |
| 211.4963595                                            | 0.876617688                             | 0.01206524                                            | 3.649889453                          |
| 319.3736007                                            | 0.894187403                             | 0.008045094                                           | 4.079888199                          |
| 266.9471125                                            | 0.757632055                             | 0.022389115                                           | 3.417696212                          |
| 313.8879526                                            | 0.893565554                             | 0.009062947                                           | 4.099684157                          |
| 307.3126123                                            | 0.880070695                             | 0.009153363                                           | 4.00984769                           |
| 374.8280296                                            | 0.88692728                              | 0.007218121                                           | 3.842425981                          |
| 398.1135246                                            | 0.865489079                             | 0.007497284                                           | 3.836762421                          |
| 458.9239607                                            | 0.821731949                             | 0.008171281                                           | 3.620424408                          |
| 302.5462929                                            | 0.922463347                             | 0.0070544                                             | 4.036076429                          |
| 266.3087039                                            | 0.907493433                             | 0.009287844                                           | 4.059447272                          |
| 298.5413304                                            | 0.876293706                             | 0.00909371                                            | 3.85598042                           |
| 296.4597232                                            | 0.913373162                             | 0.007260808                                           | 4.026477972                          |
| 833.5223504                                            | 0.864361822                             | 0.003509915                                           | 4.144427824                          |
| 236.8532109                                            | 0.893940635                             | 0.011040527                                           | 3.908349945                          |
| 413.2592004                                            | 0.884946                                | 0.007506706                                           | 4.035599346                          |
| 187.2839273                                            | 0.855100535                             | 0.017356256                                           | 3.637737811                          |
| 486.9701779                                            | 0.842570142                             | 0.006343907                                           | 3.797974071                          |

| log.sigma.1.0.mm.3D_glrIm_HighGrayLevelRunEmphasis | log.sigma.1.0.mm.3D_glrIm_RunLengthNonUniformityNormalized | log.sigma.1.0.mm.3D_glszm_GrayLevelVariance |
|----------------------------------------------------|------------------------------------------------------------|---------------------------------------------|
| 486.802711                                         | 0.854913026                                                | 25.04570896                                 |
| 150.1205919                                        | 0.763262015                                                | 15.0216115                                  |
| 125.2003155                                        | 0.722608843                                                | 13.72261527                                 |
| 253.5859762                                        | 0.808495094                                                | 20.2231894                                  |
| 196.9634121                                        | 0.802262704                                                | 17.05109414                                 |
| 270.7906659                                        | 0.858961619                                                | 23.34649786                                 |
| 230.5350602                                        | 0.790857405                                                | 15.65551774                                 |
| 297.057031                                         | 0.766208082                                                | 20.64504684                                 |
| 294.524131                                         | 0.81588227                                                 | 18.67352865                                 |
| 267.8718122                                        | 0.843333708                                                | 19.69328368                                 |
| 145.2536478                                        | 0.805803733                                                | 12.04233446                                 |
| 340.4162564                                        | 0.837886491                                                | 25.11002867                                 |
| 287.972865                                         | 0.707619216                                                | 22.02721655                                 |
| 329.4275274                                        | 0.807909503                                                | 22.48237368                                 |
| 370.6028054                                        | 0.825511801                                                | 25.84766786                                 |
| 255.2188319                                        | 0.757410771                                                | 18.08221682                                 |
| 125.8718006                                        | 0.840263435                                                | 15.35378021                                 |
| 227.76391                                          | 0.740998724                                                | 16.75938765                                 |
| 224.7531699                                        | 0.803525577                                                | 14.03047052                                 |
| 299.3241255                                        | 0.828664729                                                | 21.9709079                                  |
| 169.782692                                         | 0.710697524                                                | 11.98655953                                 |
| 150.0730837                                        | 0.836866345                                                | 14.49204898                                 |
| 291.6720886                                        | 0.808716352                                                | 16.59165574                                 |
| 231.7314245                                        | 0.806054469                                                | 15.72958169                                 |
| 271.9166879                                        | 0.803931008                                                | 20.90381944                                 |
| 385.5137522                                        | 0.846136534                                                | 23.91203658                                 |
| 267.2748804                                        | 0.826812515                                                | 20.73084377                                 |
| 289.5934955                                        | 0.791442605                                                | 19.00257902                                 |
| 151.1058747                                        | 0.857398702                                                | 13.51228083                                 |
| 259.5456807                                        | 0.796141811                                                | 15.93342157                                 |
| 330.8177269                                        | 0.765507413                                                | 20.72957936                                 |
| 249.6995885                                        | 0.757693958                                                | 16.38613694                                 |
| 260.6380126                                        | 0.803402097                                                | 21.48075874                                 |
| 232.59597                                          | 0.802161399                                                | 23.28008584                                 |
| 213.5034926                                        | 0.82644218                                                 | 21.08866176                                 |
| 229.0943619                                        | 0.761665125                                                | 18.52388833                                 |
| 480.4688994                                        | 0.777885925                                                | 24.83779629                                 |
| 438.437623                                         | 0.695890339                                                | 22.3547072                                  |
| 285.2629502                                        | 0.814429566                                                | 16.34938698                                 |
| 146.2909802                                        | 0.828432435                                                | 15.52316052                                 |
| 141.0281844                                        | 0.757359421                                                | 14.47265935                                 |
| 173.2795662                                        | 0.868762985                                                | 17.62946918                                 |
| 260.6982934                                        | 0.810756307                                                | 16.629366                                   |
| 294.2149533                                        | 0.847007709                                                | 23.36024202                                 |
| 341.234375                                         | 0.814180449                                                | 22.23955556                                 |
| 179.1043082                                        | 0.818507814                                                | 18.55826535                                 |
| 232.6046919                                        | 0.808232298                                                | 20.06436769                                 |
| 148.4251755                                        | 0.796487013                                                | 16.4264189                                  |
| 181.0561602                                        | 0.859842559                                                | 19.78134892                                 |
| 301.6542611                                        | 0.789964271                                                | 16.24567704                                 |
| 305.9768978                                        | 0.836615376                                                | 23.86474365                                 |
| 233.6088675                                        | 0.861255039                                                | 19.00625833                                 |
| 200.8792603                                        | 0.836437822                                                | 16.81756735                                 |
| 151.5010954                                        | 0.795090126                                                | 16.21303243                                 |
| 237.8260368                                        | 0.814859608                                                | 20.78773818                                 |
| 171.2557035                                        | 0.800664153                                                | 16.44194511                                 |
| 233.3663409                                        | 0.826486401                                                | 17.45709025                                 |
| 283.9775657                                        | 0.776453749                                                | 18.98729927                                 |
| 289.8898532                                        | 0.824479878                                                | 19.74032411                                 |
| 288.6010404                                        | 0.822445844                                                | 19.74175618                                 |
| 295.6605613                                        | 0.765463007                                                | 20.00606741                                 |
| 410.2765466                                        | 0.817299387                                                | 23.47371589                                 |
| 375.6831557                                        | 0.811587397                                                | 21.02445467                                 |
| 291.5975809                                        | 0.809384659                                                | 21.62242906                                 |
| 102.7456155                                        | 0.786141496                                                | 10.33880183                                 |
| 288.6545798                                        | 0.774384778                                                | 19.56273573                                 |
| 219.9188872                                        | 0.774708111                                                | 18.91450976                                 |
| 324.2013295                                        | 0.810084184                                                | 19.75971353                                 |
| 407.6330802                                        | 0.834311806                                                | 18.37378914                                 |
| 196.4796542                                        | 0.756562628                                                | 15.24482929                                 |
| 170.0599135                                        | 0.795756499                                                | 16.5781419                                  |
| 267.4069471                                        | 0.766306188                                                | 22.60656175                                 |
| 232.4142113                                        | 0.783634887                                                | 20.19343187                                 |
| 227.2931804                                        | 0.853762684                                                | 21.41867703                                 |
| 173.5865086                                        | 0.852083552                                                | 17.64645044                                 |
| 169.0255606                                        | 0.806631911                                                | 15.39371804                                 |
| 202.7826734                                        | 0.788925048                                                | 16.78074818                                 |
| 197.5393242                                        | 0.799984941                                                | 18.29528849                                 |
| 197.5112889                                        | 0.807901721                                                | 13.75198199                                 |
| 226.3468627                                        | 0.838997139                                                | 20.67682832                                 |
| 488.6656782                                        | 0.853175991                                                | 24.56512921                                 |
| 195.5200147                                        | 0.801908082                                                | 21.17892844                                 |
| 290.139475                                         | 0.763040968                                                | 18.92214843                                 |
| 143.5412489                                        | 0.783298596                                                | 10.52375865                                 |
| 228.5009949                                        | 0.81373016                                                 | 19.5878796                                  |
| 115.9300901                                        | 0.619906873                                                | 8.418142935                                 |
| 222.9135129                                        | 0.816469916                                                | 19.50939868                                 |
| 211.2755305                                        | 0.795604551                                                | 18.40756173                                 |
| 262.7386294                                        | 0.803302426                                                | 17.53058375                                 |
| 258.4981374                                        | 0.770822426                                                | 17.04460129                                 |
| 259.6670592                                        | 0.710418321                                                | 13.31293058                                 |
| 238.1235894                                        | 0.858506506                                                | 17.19320733                                 |
| 198.9877456                                        | 0.834776417                                                | 19.47995276                                 |
| 202.5429558                                        | 0.785979362                                                | 15.11609683                                 |
| 226.4873698                                        | 0.842759462                                                | 16.67044224                                 |
| 539.1746959                                        | 0.773138203                                                | 26.70715555                                 |
| 170.1715693                                        | 0.810962446                                                | 15.57490281                                 |
| 284.4078939                                        | 0.799508762                                                | 22.2593447                                  |
| 116.8484954                                        | 0.754743729                                                | 10.37976544                                 |
| 294.0005259                                        | 0.739664768                                                | 16.27262979                                 |

| log.sigma.1.0.mm.3D_glszm_SmallAreaHighGrayLevelEmphasis | log.sigma.1.0.mm.3D_glszm_GrayLevelNonUniformityNormalized | log.sigma.1.0.mm.3D_glszm_SizeZoneNonUniformityNormalized |
|----------------------------------------------------------|------------------------------------------------------------|-----------------------------------------------------------|
| 322.8147169                                              | 0.058275166                                                | 0.441347368                                               |
| 92.68776026                                              | 0.084781805                                                | 0.482063609                                               |
| 78.608585                                                | 0.089391601                                                | 0.392940674                                               |
| 154.9903927                                              | 0.07015013                                                 | 0.410215658                                               |
| 118.6747113                                              | 0.073785966                                                | 0.44509145                                                |
| 196.1480829                                              | 0.064531368                                                | 0.474741749                                               |
| 153.8604865                                              | 0.078628296                                                | 0.437278691                                               |
| 209.6751775                                              | 0.070825713                                                | 0.503931851                                               |
| 194.6390038                                              | 0.070171247                                                | 0.453219069                                               |
| 167.4541091                                              | 0.068283676                                                | 0.440853428                                               |
| 95.69672071                                              | 0.086530006                                                | 0.441812269                                               |
| 224.0911971                                              | 0.063606004                                                | 0.467798954                                               |
| 183.1389773                                              | 0.08062117                                                 | 0.431410382                                               |
| 220.2586713                                              | 0.067565014                                                | 0.461150007                                               |
| 256.0670941                                              | 0.060225263                                                | 0.490557605                                               |
| 169.823481                                               | 0.078529139                                                | 0.474020085                                               |
| 84.42821698                                              | 0.07463305                                                 | 0.39380637                                                |
| 143.0534902                                              | 0.084760494                                                | 0.464296296                                               |
| 147.6914461                                              | 0.086663832                                                | 0.427118764                                               |
| 208.2670977                                              | 0.067783472                                                | 0.466689729                                               |
| 120.5629346                                              | 0.096449963                                                | 0.462160539                                               |
| 95.35352847                                              | 0.075297959                                                | 0.430677551                                               |
| 190.8169812                                              | 0.077904134                                                | 0.441244199                                               |
| 151.466822                                               | 0.076949055                                                | 0.405641691                                               |
| 199.8777347                                              | 0.071157407                                                | 0.48191358                                                |
| 274.7609243                                              | 0.060710507                                                | 0.439677974                                               |
| 180.9179205                                              | 0.064754955                                                | 0.435748459                                               |
| 187.0551588                                              | 0.075311571                                                | 0.451355709                                               |
| 107.5472252                                              | 0.078991717                                                | 0.439133709                                               |
| 166.333775                                               | 0.082895719                                                | 0.466382576                                               |
| 223.4638395                                              | 0.069667866                                                | 0.450989011                                               |
| 161.4014614                                              | 0.081289699                                                | 0.472324598                                               |
| 184.172497                                               | 0.066480047                                                | 0.445062004                                               |
| 160.8607519                                              | 0.065001358                                                | 0.451702143                                               |
| 146.1508895                                              | 0.064755943                                                | 0.455158577                                               |
| 161.0944148                                              | 0.077370559                                                | 0.475669192                                               |
| 345.0892162                                              | 0.067419441                                                | 0.513410374                                               |
| 296.7393526                                              | 0.072464661                                                | 0.43240727                                                |
| 176.668721                                               | 0.085557396                                                | 0.431081657                                               |
| 100.2684736                                              | 0.073576744                                                | 0.431512675                                               |
| 90.64082574                                              | 0.085285052                                                | 0.442589772                                               |
| 120.0864889                                              | 0.065637746                                                | 0.396694501                                               |
| 159.123412                                               | 0.075046428                                                | 0.40824352                                                |
| 193.2499567                                              | 0.062368848                                                | 0.441730665                                               |
| 238.0607174                                              | 0.071815111                                                | 0.517539556                                               |
| 133.1273505                                              | 0.071400784                                                | 0.480275802                                               |
| 165.4088867                                              | 0.069748431                                                | 0.457718356                                               |
| 93.53396124                                              | 0.08590535                                                 | 0.44058642                                                |
| 111.7793974                                              | 0.070367665                                                | 0.409301193                                               |
| 190.2554504                                              | 0.080473959                                                | 0.429079109                                               |
| 205.3822561                                              | 0.065321415                                                | 0.453987354                                               |
| 157.1840302                                              | 0.065950599                                                | 0.431140108                                               |
| 137.1215299                                              | 0.071680895                                                | 0.451647755                                               |
| 100.1517913                                              | 0.085560171                                                | 0.429443859                                               |
| 158.2184738                                              | 0.071532695                                                | 0.431031341                                               |
| 109.2939988                                              | 0.079887964                                                | 0.450550268                                               |
| 147.9037481                                              | 0.070351616                                                | 0.416010516                                               |
| 192.7301146                                              | 0.077590747                                                | 0.453996916                                               |
| 209.3795534                                              | 0.0711176142                                               | 0.527985306                                               |
| 197.9271864                                              | 0.064325933                                                | 0.425613911                                               |
| 201.9845563                                              | 0.075382819                                                | 0.472685392                                               |
| 271.4915514                                              | 0.065300676                                                | 0.459773451                                               |
| 259.7504719                                              | 0.065805635                                                | 0.466866016                                               |
| 196.561349                                               | 0.067009409                                                | 0.45364835                                                |
| 61.65801913                                              | 0.099134619                                                | 0.374386047                                               |
| 198.7092675                                              | 0.076740166                                                | 0.465473684                                               |
| 151.0864646                                              | 0.081084229                                                | 0.466658903                                               |
| 217.8636049                                              | 0.071348857                                                | 0.47657188                                                |
| 282.9311498                                              | 0.069853994                                                | 0.478153415                                               |
| 125.2519817                                              | 0.090458423                                                | 0.449035182                                               |
| 111.6338905                                              | 0.08470795                                                 | 0.438057734                                               |
| 193.8397349                                              | 0.069297676                                                | 0.513012551                                               |
| 153.9279362                                              | 0.067637732                                                | 0.453942489                                               |
| 149.903847                                               | 0.062269577                                                | 0.421573008                                               |
| 118.9989601                                              | 0.0677534                                                  | 0.438149084                                               |
| 112.4151659                                              | 0.080073046                                                | 0.446983199                                               |
| 142.5454875                                              | 0.085201768                                                | 0.461908233                                               |
| 124.8942558                                              | 0.079868985                                                | 0.466805241                                               |
| 123.703576                                               | 0.08726254                                                 | 0.414275823                                               |
| 160.2155942                                              | 0.063382315                                                | 0.440237877                                               |
| 324.5198946                                              | 0.059002737                                                | 0.437521547                                               |
| 133.7728624                                              | 0.065987896                                                | 0.474097544                                               |
| 193.7878117                                              | 0.076282796                                                | 0.442788692                                               |
| 90.0899294                                               | 0.102805794                                                | 0.395377091                                               |
| 149.8412954                                              | 0.066170982                                                | 0.44936397                                                |
| 62.21840722                                              | 0.129113601                                                | 0.41281241                                                |
| 157.8576302                                              | 0.067119499                                                | 0.479745957                                               |
| 145.1589266                                              | 0.071608796                                                | 0.441720679                                               |
| 180.2668215                                              | 0.079689072                                                | 0.453180918                                               |
| 171.6449334                                              | 0.081262616                                                | 0.481053419                                               |
| 187.7958566                                              | 0.107104737                                                | 0.48153467                                                |
| 160.5513008                                              | 0.068595027                                                | 0.43349753                                                |
| 132.4327682                                              | 0.06740603                                                 | 0.439240771                                               |
| 137.6738198                                              | 0.080493408                                                | 0.462686864                                               |
| 148.04031                                                | 0.070437251                                                | 0.407733465                                               |
| 363.595945                                               | 0.06331455                                                 | 0.452638708                                               |
| 109.7966551                                              | 0.077637461                                                | 0.412621852                                               |
| 188.9918176                                              | 0.067901235                                                | 0.445256098                                               |
| 68.76462854                                              | 0.104480604                                                | 0.370643857                                               |
| 200.3242642                                              | 0.088152634                                                | 0.471291735                                               |

| log.sigma.1.0.mm.3D_glszm_SizeZoneNonUniformity | log.sigma.1.0.mm.3D_glszm_GrayLevelNonUniformity | log.sigma.1.0.mm.3D_glszm_LargeAreaEmphasis | log.sigma.1.0.mm.3D_glszm_ZoneVariance |
|-------------------------------------------------|--------------------------------------------------|---------------------------------------------|----------------------------------------|
| 354.8432836                                     | 46.85323383                                      | 83.14427861                                 | 76.17835573                            |
| 100.2692308                                     | 17.63461538                                      | 500.1201923                                 | 479.9134384                            |
| 126.1339564                                     | 28.69470405                                      | 1063.551402                                 | 1040.714318                            |
| 117.3216783                                     | 20.06293706                                      | 157.3181818                                 | 145.6485525                            |
| 290.6447167                                     | 48.18223583                                      | 643.8070444                                 | 630.6567028                            |
| 119.6349206                                     | 16.26190476                                      | 70.96825397                                 | 64.10884354                            |
| 659.8535454                                     | 118.6500994                                      | 1226.481776                                 | 1212.457769                            |
| 653.095679                                      | 91.79012346                                      | 1956.861111                                 | 1941.326808                            |
| 584.1993794                                     | 90.45073701                                      | 399.5655547                                 | 387.1274838                            |
| 156.9438202                                     | 24.30898876                                      | 66.91573034                                 | 57.84818836                            |
| 169.2140992                                     | 33.14099217                                      | 293.6814621                                 | 278.1788409                            |
| 360.2051948                                     | 48.97662338                                      | 148.9181818                                 | 139.9571007                            |
| 147.9737609                                     | 27.65306122                                      | 1878.848397                                 | 1849.220529                            |
| 219.9685535                                     | 32.22851153                                      | 396.5932914                                 | 383.6363101                            |
| 319.8435583                                     | 39.26687117                                      | 223.3803681                                 | 214.1208551                            |
| 468.8058645                                     | 77.6653185                                       | 2133.003033                                 | 2113.425316                            |
| 154.7659033                                     | 29.3307888                                       | 55.99491094                                 | 46.76444652                            |
| 104.4666667                                     | 19.07111111                                      | 1007.124444                                 | 977.0940444                            |
| 143.5119048                                     | 29.11904762                                      | 402.047619                                  | 387.1241142                            |
| 760.2375691                                     | 110.4192756                                      | 386.9386126                                 | 376.7527582                            |
| 256.4990991                                     | 53.52972973                                      | 2518.518919                                 | 2488.831147                            |
| 150.7371429                                     | 26.35428571                                      | 96.71142857                                 | 87.20742041                            |
| 128.4020619                                     | 22.67010309                                      | 233.0309278                                 | 220.6482682                            |
| 294.4958678                                     | 55.86501377                                      | 357.6267218                                 | 344.3333656                            |
| 173.4888889                                     | 25.61666667                                      | 213.7638889                                 | 201.2598071                            |
| 374.6056338                                     | 51.72535211                                      | 206.6866197                                 | 198.9553481                            |
| 447.9494163                                     | 66.56809339                                      | 407.25                                      | 397.3593421                            |
| 312.3381503                                     | 52.11560694                                      | 993.8757225                                 | 977.9450115                            |
| 73.33532934                                     | 13.19161677                                      | 33.31137725                                 | 26.14693965                            |
| 246.25                                          | 43.76893939                                      | 614.2083333                                 | 599.0750545                            |
| 541.6378018                                     | 83.67110741                                      | 1579.142381                                 | 1563.447326                            |
| 214.9076923                                     | 36.98681319                                      | 941.2505495                                 | 920.5730419                            |
| 419.2484076                                     | 62.62420382                                      | 466.7165605                                 | 454.9666574                            |
| 303.9955423                                     | 43.74591382                                      | 478.6389302                                 | 466.4460699                            |
| 632.2152628                                     | 89.94600432                                      | 256.9388049                                 | 246.8859334                            |
| 322.9793814                                     | 52.53460972                                      | 1471.170839                                 | 1451.662811                            |
| 456.4218223                                     | 59.93588301                                      | 1585.668166                                 | 1568.148904                            |
| 419.4350515                                     | 70.29072165                                      | 4475.708247                                 | 4447.399266                            |
| 140.1015385                                     | 27.80615385                                      | 301.6123077                                 | 287.2889941                            |
| 938.1085557                                     | 159.9558418                                      | 414.8160074                                 | 403.6332284                            |
| 242.9817851                                     | 46.82149362                                      | 1391.82878                                  | 1369.503585                            |
| 576.3971094                                     | 95.37164487                                      | 24.8678596                                  | 17.78486166                            |
| 409.876494                                      | 75.34661355                                      | 434.9312749                                 | 421.692984                             |
| 379.8883721                                     | 53.6372093                                       | 239.5511628                                 | 231.1815792                            |
| 194.0773333                                     | 26.93066667                                      | 239.3653333                                 | 227.7508693                            |
| 398.6289157                                     | 59.2626506                                       | 299.5746988                                 | 288.6369357                            |
| 608.7654135                                     | 92.76541353                                      | 908.0135338                                 | 896.248118                             |
| 95.16666667                                     | 18.55555556                                      | 380.4768519                                 | 364.2165424                            |
| 136.2972973                                     | 23.43243243                                      | 55.61861862                                 | 49.08775442                            |
| 140.3088685                                     | 26.31498471                                      | 470.9724771                                 | 453.877919                             |
| 366.8217822                                     | 52.77970297                                      | 199.6076733                                 | 189.4987363                            |
| 538.4939952                                     | 82.37229784                                      | 46.9071257                                  | 39.62274511                            |
| 637.2749823                                     | 101.1417434                                      | 385.8355776                                 | 375.610087                             |
| 109.0787402                                     | 21.73228346                                      | 342.0393701                                 | 323.1476843                            |
| 168.9642857                                     | 28.04081633                                      | 263.0765306                                 | 251.565051                             |
| 221.6707317                                     | 39.30487805                                      | 526.4593496                                 | 510.750694                             |
| 522.9252188                                     | 88.43198091                                      | 220.6833731                                 | 210.3279822                            |
| 360.4735516                                     | 61.6070529                                       | 1337.027708                                 | 1318.060257                            |
| 268.2165354                                     | 36.15748031                                      | 311.3385827                                 | 300.8144336                            |
| 1195.975089                                     | 180.7558719                                      | 300.466548                                  | 289.9121426                            |
| 222.6348195                                     | 35.5030786                                       | 682.6199575                                 | 668.5614381                            |
| 371.0371747                                     | 52.6976456                                       | 407.0656753                                 | 396.119171                             |
| 819.3498575                                     | 115.4888889                                      | 891.9048433                                 | 881.024243                             |
| 953.1151832                                     | 140.7867682                                      | 926.8391242                                 | 913.6747647                            |
| 64.76878613                                     | 17.15028902                                      | 304.150289                                  | 283.2976043                            |
| 442.2                                           | 72.90315789                                      | 1436.644211                                 | 1420.117846                            |
| 149.7975078                                     | 26.02803738                                      | 536.9158879                                 | 520.4135635                            |
| 860.6888151                                     | 128.8560354                                      | 1023.573643                                 | 1011.597292                            |
| 937.6588475                                     | 136.9836818                                      | 343.5119837                                 | 334.5913591                            |
| 248.3164557                                     | 50.02350814                                      | 2037.699819                                 | 2010.236913                            |
| 150.6918605                                     | 29.13953488                                      | 324.0319767                                 | 309.7725713                            |
| 526.3508772                                     | 71.0994152                                       | 1997.469786                                 | 1979.986628                            |
| 276.904918                                      | 41.25901639                                      | 536.5032787                                 | 522.5450927                            |
| 340.2094176                                     | 50.25154895                                      | 138.4349442                                 | 130.5991073                            |
| 482.8402904                                     | 74.66424682                                      | 111.2041742                                 | 103.1317692                            |
| 165.3837838                                     | 29.62702703                                      | 296.9567568                                 | 283.8014317                            |
| 271.6020408                                     | 50.09863946                                      | 898.462585                                  | 881.8583461                            |
| 117.6349206                                     | 20.12698413                                      | 296.5555556                                 | 282.1034895                            |
| 193.4668094                                     | 40.751606                                        | 304.8201285                                 | 291.4593033                            |
| 344.706258                                      | 49.62835249                                      | 161.0383142                                 | 152.1147794                            |
| 329.8912467                                     | 44.48806366                                      | 93.71750663                                 | 86.75882649                            |
| 251.2716981                                     | 34.97358491                                      | 361.5566038                                 | 350.0350623                            |
| 352.459799                                      | 60.72110553                                      | 1231.94598                                  | 1215.080306                            |
| 244.3430421                                     | 63.53398058                                      | 1413.156958                                 | 1388.431282                            |
| 328.9344262                                     | 48.43715847                                      | 198.9494536                                 | 187.847448                             |
| 73.06779661                                     | 22.85310734                                      | 3343.819209                                 | 3268.903827                            |
| 357.4107383                                     | 50.00402685                                      | 371.0053691                                 | 360.7567767                            |
| 318.0388889                                     | 51.55833333                                      | 697.4666667                                 | 682.9632639                            |
| 183.5382716                                     | 32.27407407                                      | 415.4024691                                 | 402.335583                             |
| 231.3866944                                     | 39.08731809                                      | 894.1101871                                 | 876.3862622                            |
| 109.30837                                       | 24.31277533                                      | 1425.568282                                 | 1392.569078                            |
| 377.576349                                      | 59.74626866                                      | 58.33065442                                 | 50.8515912                             |
| 683.8978805                                     | 104.9511882                                      | 492.8278741                                 | 481.746715                             |
| 388.1942789                                     | 67.53396901                                      | 923.2467223                                 | 907.7762363                            |
| 565.5263158                                     | 97.6964672                                       | 97.07137707                                 | 87.22617009                            |
| 415.9749728                                     | 58.18607182                                      | 118.668118                                  | 1104.802827                            |
| 319.7819355                                     | 60.16903226                                      | 212.1870968                                 | 198.9750443                            |
| 136.248366                                      | 20.77777778                                      | 260.5196078                                 | 248.812476                             |
| 64.12138728                                     | 18.07514451                                      | 502.3583815                                 | 479.1181797                            |
| 555.1816638                                     | 103.8438031                                      | 3583.185059                                 | 3559.160083                            |

| log.sigma.1.0.mm.3D_glszm_ZonePercentage | log.sigma.1.0.mm.3D_glszm_LargeAreaLowGrayLevelEmphasis | log.sigma.1.0.mm.3D_glszm_LargeAreaHighGrayLevelEmphasis | log.sigma.1.0.mm.3D_glszm_HighGrayLevelZoneEmphasis |
|------------------------------------------|---------------------------------------------------------|----------------------------------------------------------|-----------------------------------------------------|
| 0.378887842                              | 0.17921157                                              | 39362.51368                                              | 476.608209                                          |
| 0.222459893                              | 3.470845185                                             | 73002.39904                                              | 141.4759615                                         |
| 0.209256845                              | 9.15876826                                              | 124824.1121                                              | 126.1090343                                         |
| 0.292732856                              | 0.638088196                                             | 39912.84266                                              | 240.8391608                                         |
| 0.275760135                              | 3.186761786                                             | 131349.5161                                              | 178.4150077                                         |
| 0.381818182                              | 0.286273819                                             | 18265.68254                                              | 276.0555556                                         |
| 0.267032384                              | 5.591356207                                             | 270264.6733                                              | 227.5904573                                         |
| 0.253719655                              | 6.85699018                                              | 559877.8997                                              | 393.0232765                                         |
| 0.283545974                              | 1.339462054                                             | 120163.4228                                              | 282.1753297                                         |
| 0.332089552                              | 0.25769615                                              | 18115.50562                                              | 255.2640449                                         |
| 0.25397878                               | 2.025492149                                             | 43436.56919                                              | 139.1488251                                         |
| 0.334056399                              | 0.449306826                                             | 50244.48052                                              | 326.0649351                                         |
| 0.183717193                              | 6.715182784                                             | 528201.102                                               | 281.7725948                                         |
| 0.277810134                              | 1.193061443                                             | 132981.4319                                              | 319.3039832                                         |
| 0.328629032                              | 0.622758374                                             | 80940.2362                                               | 360.7039877                                         |
| 0.226005484                              | 8.433994632                                             | 542203.5854                                              | 245.3629929                                         |
| 0.329145729                              | 0.488737364                                             | 6967.725191                                              | 127.1857506                                         |
| 0.182481752                              | 4.41629418                                              | 231540.3644                                              | 210.7733333                                         |
| 0.258859784                              | 1.753196705                                             | 93176.53869                                              | 218.452381                                          |
| 0.313329486                              | 1.329805452                                             | 113597.6654                                              | 297.1356661                                         |
| 0.183531746                              | 15.29314364                                             | 417219.9477                                              | 171.2918919                                         |
| 0.324374421                              | 0.655032505                                             | 14934.26571                                              | 143.0228571                                         |
| 0.284179688                              | 0.810828628                                             | 67708.35739                                              | 282.024055                                          |
| 0.274272762                              | 1.638406511                                             | 79038.69008                                              | 232.0950413                                         |
| 0.282796544                              | 0.857920318                                             | 54279.85556                                              | 280.9194444                                         |
| 0.35964542                               | 0.563289087                                             | 76555.60681                                              | 396.193662                                          |
| 0.317970925                              | 1.597811833                                             | 104608.8891                                              | 267.1108949                                         |
| 0.250543085                              | 3.413312947                                             | 291270.8454                                              | 276.3453757                                         |
| 0.37360179                               | 0.242790586                                             | 4959.51497                                               | 154.0838323                                         |
| 0.257059396                              | 2.375327986                                             | 159638.9299                                              | 244.1837121                                         |
| 0.252416982                              | 4.945689541                                             | 505777.9359                                              | 326.8193172                                         |
| 0.219913001                              | 3.73180516                                              | 238758.8791                                              | 229.9956044                                         |
| 0.291731186                              | 1.838259122                                             | 119252.0106                                              | 264.3375796                                         |
| 0.286382979                              | 2.155755473                                             | 107384.8247                                              | 232.5616642                                         |
| 0.315395095                              | 1.284038686                                             | 52162.51908                                              | 212.938085                                          |
| 0.226408803                              | 6.712798884                                             | 324128.1325                                              | 228.9661267                                         |
| 0.23891427                               | 3.328056735                                             | 758651.6513                                              | 469.6254218                                         |
| 0.187948072                              | 10.44170229                                             | 1922917.367                                              | 439.2721649                                         |
| 0.264227642                              | 0.98528437                                              | 93471.25231                                              | 266.3784615                                         |
| 0.299037139                              | 2.896535589                                             | 60360.18583                                              | 147.9636615                                         |
| 0.211642251                              | 10.04183974                                             | 194963.6029                                              | 133.2786885                                         |
| 0.37574347                               | 0.166127121                                             | 4176.64212                                               | 179.6352374                                         |
| 0.274842595                              | 1.680369442                                             | 113457.7291                                              | 246.5866534                                         |
| 0.345659164                              | 0.808519507                                             | 72033.52326                                              | 284.4081395                                         |
| 0.29342723                               | 0.711574429                                             | 81749.584                                                | 331.056                                             |
| 0.302367942                              | 1.788360775                                             | 51034.43976                                              | 183.7891566                                         |
| 0.291538799                              | 4.071502757                                             | 203557.6398                                              | 235.9112782                                         |
| 0.247990815                              | 2.566555996                                             | 57464.89815                                              | 139.9861111                                         |
| 0.391304348                              | 0.336690442                                             | 9902.006006                                              | 175.6936937                                         |
| 0.241863905                              | 1.625881454                                             | 137459.2294                                              | 290.6697248                                         |
| 0.314519268                              | 0.694089426                                             | 58172.22525                                              | 302.8539604                                         |
| 0.370513201                              | 0.213056271                                             | 10876.06565                                              | 232.040032                                          |
| 0.312721631                              | 1.954735788                                             | 76915.04181                                              | 196.6739901                                         |
| 0.230072464                              | 2.345718848                                             | 50883.55512                                              | 151.8346457                                         |
| 0.294736842                              | 1.169736936                                             | 59971.02806                                              | 239.0280612                                         |
| 0.252307692                              | 3.174891416                                             | 88589.0874                                               | 163.4329268                                         |
| 0.310754017                              | 0.962775568                                             | 51241.92363                                              | 225.3031026                                         |
| 0.229612493                              | 4.700953051                                             | 382735.9408                                              | 278.0188917                                         |
| 0.308252427                              | 1.067507647                                             | 91552.97835                                              | 280.8681102                                         |
| 0.307810275                              | 1.107494697                                             | 82399.95302                                              | 291.0765125                                         |
| 0.266704417                              | 2.381234447                                             | 196453.1359                                              | 290.8216561                                         |
| 0.302247191                              | 1.019589206                                             | 163521.8971                                              | 396.9640644                                         |
| 0.303161168                              | 2.464773056                                             | 323711.9339                                              | 373.3726496                                         |
| 0.275613276                              | 3.134751759                                             | 275441.7796                                              | 284.6611138                                         |
| 0.218987342                              | 3.159888901                                             | 30004.56647                                              | 99.43930636                                         |
| 0.245986535                              | 5.038097527                                             | 411277.5411                                              | 282.0368421                                         |
| 0.246165644                              | 2.414612595                                             | 120394.4206                                              | 212.4797508                                         |
| 0.28896                                  | 3.084055672                                             | 341262.3666                                              | 312.0636766                                         |
| 0.334813044                              | 0.843344493                                             | 140849.9602                                              | 397.6399796                                         |
| 0.190821256                              | 10.63798446                                             | 393997.7143                                              | 187.5045208                                         |
| 0.264819092                              | 1.933851232                                             | 55501.88081                                              | 164.7238372                                         |
| 0.239160839                              | 7.748229357                                             | 517452.2768                                              | 269.1822612                                         |
| 0.267661255                              | 2.443591351                                             | 119119.3311                                              | 227.4590164                                         |
| 0.357237716                              | 0.617008437                                             | 32079.42379                                              | 224.7372986                                         |
| 0.351964229                              | 0.695399555                                             | 18481.76225                                              | 174.6914701                                         |
| 0.275707899                              | 1.668669193                                             | 53747.08108                                              | 162                                                 |
| 0.245409015                              | 4.567945115                                             | 178436.2925                                              | 206.3112245                                         |
| 0.263048017                              | 1.522873016                                             | 58685.5119                                               | 185.2380952                                         |
| 0.273579379                              | 1.522317725                                             | 62012.56959                                              | 191.2633833                                         |
| 0.334758444                              | 0.718234322                                             | 36976.65262                                              | 228.9131545                                         |
| 0.379084967                              | 0.201353717                                             | 44411.1565                                               | 479.770557                                          |
| 0.294608116                              | 1.842934147                                             | 72278.22642                                              | 187.8811321                                         |
| 0.243499541                              | 4.324643349                                             | 352152.5716                                              | 284.4974874                                         |
| 0.201106411                              | 9.638162203                                             | 209459.6084                                              | 139.4822006                                         |
| 0.300123001                              | 0.891128257                                             | 45096.52459                                              | 220.204918                                          |
| 0.115535248                              | 28.62993839                                             | 393297.9209                                              | 99.36723164                                         |
| 0.312368973                              | 1.675379402                                             | 83291.55436                                              | 217.9221477                                         |
| 0.262582057                              | 3.56948059                                              | 137786.7111                                              | 213.6305556                                         |
| 0.276639344                              | 1.613590754                                             | 107826.1778                                              | 259.582716                                          |
| 0.237530864                              | 3.464983893                                             | 232017.5946                                              | 244.2328482                                         |
| 0.174079755                              | 5.747630164                                             | 355420.8767                                              | 265.1013216                                         |
| 0.36565911                               | 0.259087483                                             | 13609.98278                                              | 238.1814007                                         |
| 0.300405171                              | 2.455789035                                             | 100538.6076                                              | 193.2048812                                         |
| 0.254242424                              | 4.827547699                                             | 178181.3611                                              | 199.9010727                                         |
| 0.318704044                              | 0.43536453                                              | 22333.32949                                              | 223.9307859                                         |
| 0.2685564                                | 2.118197888                                             | 592187.1926                                              | 530.9270947                                         |
| 0.275115371                              | 1.259802579                                             | 36576.14065                                              | 166.8490323                                         |
| 0.29226361                               | 0.908878486                                             | 75563.9281                                               | 276.7973856                                         |
| 0.207434053                              | 4.243251134                                             | 60274.21387                                              | 112.1213873                                         |
| 0.204018012                              | 12.56510419                                             | 1024092.463                                              | 291.1341256                                         |

| log.sigma.1.0.mm.3D_glszm_SmallAreaEmphasis | log.sigma.1.0.mm.3D_glszm_LowGrayLevelZoneEmphasis | log.sigma.1.0.mm.3D_glszm_ZoneEntropy | log.sigma.1.0.mm.3D_glszm_SmallAreaLowGrayLevelEmphasis |
|---------------------------------------------|----------------------------------------------------|---------------------------------------|---------------------------------------------------------|
| 0.69099797                                  | 0.004039685                                        | 5.97462844                            | 0.00333884                                              |
| 0.72097623                                  | 0.019451511                                        | 5.095665412                           | 0.017430508                                             |
| 0.649249495                                 | 0.024628382                                        | 5.40280153                            | 0.020695331                                             |
| 0.665548033                                 | 0.014046869                                        | 5.64795231                            | 0.012182489                                             |
| 0.693638914                                 | 0.012366479                                        | 5.61677029                            | 0.010173841                                             |
| 0.715595185                                 | 0.010583176                                        | 5.456195358                           | 0.009336628                                             |
| 0.687579985                                 | 0.007045113                                        | 5.695667904                           | 0.005395454                                             |
| 0.737532834                                 | 0.006033715                                        | 5.6016636                             | 0.004999787                                             |
| 0.70009098                                  | 0.00593083                                         | 5.765691207                           | 0.004687082                                             |
| 0.690381593                                 | 0.009229957                                        | 5.619623414                           | 0.007865624                                             |
| 0.690680049                                 | 0.014855111                                        | 5.415800451                           | 0.011560969                                             |
| 0.710792138                                 | 0.007238966                                        | 5.806318185                           | 0.006268819                                             |
| 0.680984401                                 | 0.012087942                                        | 5.487059123                           | 0.010775508                                             |
| 0.70591823                                  | 0.006776312                                        | 5.67232698                            | 0.005644694                                             |
| 0.727943176                                 | 0.005810853                                        | 5.762270269                           | 0.00493868                                              |
| 0.715851375                                 | 0.008341109                                        | 5.572085732                           | 0.006795815                                             |
| 0.652242717                                 | 0.02088549                                         | 5.676286187                           | 0.016494157                                             |
| 0.708002881                                 | 0.011935974                                        | 5.175008437                           | 0.010142241                                             |
| 0.678811493                                 | 0.009134851                                        | 5.398230146                           | 0.00743891                                              |
| 0.710337126                                 | 0.008063553                                        | 5.796196583                           | 0.006932435                                             |
| 0.706482918                                 | 0.009899028                                        | 5.232358998                           | 0.007797376                                             |
| 0.682425915                                 | 0.021798002                                        | 5.557990123                           | 0.019033916                                             |
| 0.690125945                                 | 0.008223536                                        | 5.450804753                           | 0.006993815                                             |
| 0.662016161                                 | 0.008323582                                        | 5.737125472                           | 0.006656721                                             |
| 0.721199149                                 | 0.011535449                                        | 5.476749542                           | 0.010180944                                             |
| 0.688764796                                 | 0.004634944                                        | 5.89600608                            | 0.00369361                                              |
| 0.686528069                                 | 0.00748868                                         | 5.879199211                           | 0.006032827                                             |
| 0.697248096                                 | 0.007860787                                        | 5.576017969                           | 0.006628553                                             |
| 0.688796879                                 | 0.016423682                                        | 5.234702049                           | 0.01365602                                              |
| 0.709793792                                 | 0.00839173                                         | 5.429944576                           | 0.007060672                                             |
| 0.698437523                                 | 0.006228843                                        | 5.761420533                           | 0.005133618                                             |
| 0.714336365                                 | 0.008856965                                        | 5.41480465                            | 0.007287194                                             |
| 0.693650026                                 | 0.007196388                                        | 5.834889652                           | 0.00574023                                              |
| 0.6987578                                   | 0.015950864                                        | 5.791866759                           | 0.014168445                                             |
| 0.701595404                                 | 0.010971976                                        | 5.827085633                           | 0.009199187                                             |
| 0.716910183                                 | 0.008951068                                        | 5.532908651                           | 0.007308175                                             |
| 0.743958943                                 | 0.004167882                                        | 5.68048062                            | 0.003568647                                             |
| 0.683395218                                 | 0.004367578                                        | 5.801191309                           | 0.003560295                                             |
| 0.682224472                                 | 0.009192354                                        | 5.423723911                           | 0.007880244                                             |
| 0.68323491                                  | 0.014212041                                        | 5.823225375                           | 0.01111279                                              |
| 0.691882072                                 | 0.019081581                                        | 5.45167034                            | 0.014513728                                             |
| 0.654861907                                 | 0.010735411                                        | 6.024719783                           | 0.008063638                                             |
| 0.664014479                                 | 0.007237309                                        | 5.800462468                           | 0.005691074                                             |
| 0.690860937                                 | 0.008571092                                        | 5.845643984                           | 0.00715965                                              |
| 0.74607056                                  | 0.008163697                                        | 5.444085246                           | 0.007389113                                             |
| 0.720467039                                 | 0.011851673                                        | 5.551762039                           | 0.009840353                                             |
| 0.703224192                                 | 0.008113199                                        | 5.745162895                           | 0.006249741                                             |
| 0.687562167                                 | 0.028147717                                        | 5.163300704                           | 0.025212046                                             |
| 0.663444026                                 | 0.02019751                                         | 5.62110822                            | 0.017177397                                             |
| 0.681010391                                 | 0.007660979                                        | 5.482842629                           | 0.006504314                                             |
| 0.700589126                                 | 0.007067112                                        | 5.79710016                            | 0.005987175                                             |
| 0.682691878                                 | 0.007886419                                        | 5.882562705                           | 0.006189544                                             |
| 0.69872392                                  | 0.009746105                                        | 5.713230018                           | 0.007710156                                             |
| 0.680612168                                 | 0.020550668                                        | 5.387247251                           | 0.017896997                                             |
| 0.680300608                                 | 0.012731753                                        | 5.615537707                           | 0.011132947                                             |
| 0.698074863                                 | 0.020581338                                        | 5.479423822                           | 0.018300808                                             |
| 0.670867232                                 | 0.008121529                                        | 5.874137188                           | 0.006305689                                             |
| 0.700672746                                 | 0.006888009                                        | 5.649141132                           | 0.005627292                                             |
| 0.75208536                                  | 0.007308055                                        | 5.449633738                           | 0.006316588                                             |
| 0.678543429                                 | 0.005602541                                        | 6.035471819                           | 0.004236961                                             |
| 0.714806152                                 | 0.00755073                                         | 5.525262023                           | 0.006473625                                             |
| 0.704839739                                 | 0.005302252                                        | 5.797666935                           | 0.004493652                                             |
| 0.710564145                                 | 0.004293451                                        | 5.80139712                            | 0.003432997                                             |
| 0.700477487                                 | 0.00705993                                         | 5.909066164                           | 0.005822483                                             |
| 0.635003331                                 | 0.024259074                                        | 5.184414164                           | 0.018786555                                             |
| 0.709370509                                 | 0.007054334                                        | 5.635463204                           | 0.005792328                                             |
| 0.710068283                                 | 0.012559255                                        | 5.404523154                           | 0.010624627                                             |
| 0.717530301                                 | 0.005174552                                        | 5.736334482                           | 0.00416288                                              |
| 0.71887254                                  | 0.004302089                                        | 5.746630376                           | 0.003513869                                             |
| 0.696858375                                 | 0.01141935                                         | 5.368216973                           | 0.009654932                                             |
| 0.687569186                                 | 0.017657746                                        | 5.432459349                           | 0.014838979                                             |
| 0.743839764                                 | 0.010964515                                        | 5.58447179                            | 0.00973853                                              |
| 0.700557871                                 | 0.009155285                                        | 5.677009445                           | 0.007542222                                             |
| 0.675092347                                 | 0.009613194                                        | 5.909523131                           | 0.006787018                                             |
| 0.688388044                                 | 0.013533934                                        | 5.793553464                           | 0.010949688                                             |
| 0.694941287                                 | 0.01391578                                         | 5.462745919                           | 0.01142334                                              |
| 0.705808782                                 | 0.009490726                                        | 5.404483302                           | 0.007775423                                             |
| 0.709884478                                 | 0.020072988                                        | 5.399382426                           | 0.018345248                                             |
| 0.669274847                                 | 0.011049225                                        | 5.520466622                           | 0.008923666                                             |
| 0.690129826                                 | 0.010653532                                        | 5.863709089                           | 0.008693848                                             |
| 0.687928203                                 | 0.004093633                                        | 5.948867082                           | 0.003385278                                             |
| 0.713877009                                 | 0.016959934                                        | 5.576505958                           | 0.0144985                                               |
| 0.691926882                                 | 0.006902077                                        | 5.687912151                           | 0.005621049                                             |
| 0.653832257                                 | 0.012555324                                        | 5.440221577                           | 0.009451764                                             |
| 0.696921955                                 | 0.009072389                                        | 5.813783861                           | 0.007294451                                             |
| 0.667531757                                 | 0.028033345                                        | 4.869498677                           | 0.024130941                                             |
| 0.71979611                                  | 0.011274806                                        | 5.691190015                           | 0.00955553                                              |
| 0.69130972                                  | 0.010137867                                        | 5.717510173                           | 0.008116872                                             |
| 0.700059662                                 | 0.00858703                                         | 5.485698622                           | 0.007079594                                             |
| 0.720427767                                 | 0.009204512                                        | 5.465072852                           | 0.007945088                                             |
| 0.720757207                                 | 0.009041449                                        | 4.909885909                           | 0.007904902                                             |
| 0.684519783                                 | 0.007771856                                        | 5.73084995                            | 0.006249293                                             |
| 0.689349959                                 | 0.011362122                                        | 5.85656845                            | 0.009188664                                             |
| 0.70735544                                  | 0.00982407                                         | 5.527252723                           | 0.00808936                                              |
| 0.664146948                                 | 0.007673851                                        | 5.936432663                           | 0.005875852                                             |
| 0.699691205                                 | 0.00364985                                         | 5.898776125                           | 0.003021894                                             |
| 0.668045781                                 | 0.013165736                                        | 5.707119243                           | 0.010517525                                             |
| 0.693639871                                 | 0.01028819                                         | 5.654776209                           | 0.008970368                                             |
| 0.632177517                                 | 0.020238587                                        | 5.207493934                           | 0.01578408                                              |
| 0.713939701                                 | 0.005520072                                        | 5.411178087                           | 0.004458147                                             |



| log.sigma.1.0.mm.3D_ngtdm_Coarseness | log.sigma.1.0.mm.3D_ngtdm_Complexity | log.sigma.1.0.mm.3D_ngtdm_Strength | log.sigma.1.0.mm.3D_ngtdm_Busyness | log.sigma.1.0.mm.3D_ngtdm_Contrast |
|--------------------------------------|--------------------------------------|------------------------------------|------------------------------------|------------------------------------|
| 0.00323206                           | 0.464690923                          | 0.991773636                        | 0.372086786                        | 4.23E-05                           |
| 0.007026039                          | 0.282785853                          | 1.129900732                        | 0.415928734                        | 4.52E-05                           |
| 0.004693305                          | 0.138434808                          | 0.615384064                        | 0.726478647                        | 2.51E-05                           |
| 0.007010181                          | 0.480581712                          | 1.36210989                         | 0.29362793                         | 7.88E-05                           |
| 0.002766383                          | 0.170737163                          | 0.493279358                        | 0.876250159                        | 2.78E-05                           |
| 0.009829029                          | 0.973614883                          | 2.435233099                        | 0.198146949                        | 0.000141661                        |
| 0.001228098                          | 0.095698918                          | 0.322287574                        | 1.440404852                        | 6.49E-06                           |
| 0.001363237                          | 0.113955535                          | 0.440859405                        | 1.068902189                        | 7.57E-06                           |
| 0.00148805                           | 0.167599362                          | 0.496594267                        | 0.926832172                        | 8.94E-06                           |
| 0.005912269                          | 0.551759122                          | 1.391363487                        | 0.309612715                        | 6.52E-05                           |
| 0.004314803                          | 0.187886094                          | 0.640001076                        | 0.711036876                        | 2.95E-05                           |
| 0.002796471                          | 0.402839122                          | 1.018385668                        | 0.457346201                        | 2.73E-05                           |
| 0.003660931                          | 0.268447911                          | 1.542333649                        | 0.366849144                        | 1.24E-05                           |
| 0.00401507                           | 0.350197084                          | 1.007631163                        | 0.385966074                        | 3.67E-05                           |
| 0.003467515                          | 0.445787195                          | 1.089882753                        | 0.373128799                        | 3.55E-05                           |
| 0.001571118                          | 0.123163446                          | 0.520103706                        | 0.974676363                        | 6.88E-06                           |
| 0.005584248                          | 0.324210784                          | 0.79273907                         | 0.636227511                        | 6.63E-05                           |
| 0.005323646                          | 0.273121424                          | 1.409800715                        | 0.358291452                        | 2.22E-05                           |
| 0.005063771                          | 0.260364765                          | 0.850704276                        | 0.462610663                        | 3.58E-05                           |
| 0.001287643                          | 0.173147211                          | 0.5064799                          | 0.995462182                        | 8.40E-06                           |
| 0.002247954                          | 0.068151097                          | 0.354321622                        | 1.249046424                        | 9.06E-06                           |
| 0.005734109                          | 0.286195206                          | 0.685362295                        | 0.626130435                        | 8.29E-05                           |
| 0.006391103                          | 0.445146068                          | 1.338079402                        | 0.292676353                        | 5.33E-05                           |
| 0.002588353                          | 0.177312664                          | 0.595098458                        | 0.765624259                        | 1.66E-05                           |
| 0.005367748                          | 0.409142062                          | 1.349862138                        | 0.32760136                         | 4.25E-05                           |
| 0.002880099                          | 0.37859492                           | 0.971407273                        | 0.439136957                        | 2.72E-05                           |
| 0.002219472                          | 0.213792567                          | 0.56369759                         | 0.765014949                        | 1.97E-05                           |
| 0.00251831                           | 0.197439023                          | 0.741556414                        | 0.61245168                         | 1.43E-05                           |
| 0.01390478                           | 0.704863872                          | 1.554037268                        | 0.265688271                        | 0.000205722                        |
| 0.003189707                          | 0.237199211                          | 0.93082337                         | 0.525804319                        | 1.72E-05                           |
| 0.001479185                          | 0.151362357                          | 0.599379597                        | 0.810079319                        | 6.51E-06                           |
| 0.003464534                          | 0.205574575                          | 0.819225335                        | 0.511638159                        | 1.75E-05                           |
| 0.00224592                           | 0.244265149                          | 0.781387546                        | 0.639840038                        | 1.29E-05                           |
| 0.003121248                          | 0.266516951                          | 0.813693147                        | 0.555348635                        | 2.34E-05                           |
| 0.001583072                          | 0.164782632                          | 0.446622861                        | 1.120961458                        | 1.25E-05                           |
| 0.002336573                          | 0.167900249                          | 0.715787797                        | 0.732971489                        | 1.08E-05                           |
| 0.001896258                          | 0.270110651                          | 1.1404572                          | 0.449389006                        | 7.51E-06                           |
| 0.001345142                          | 0.132808035                          | 0.79216769                         | 0.713628373                        | 4.01E-06                           |
| 0.004952041                          | 0.388722571                          | 1.314635911                        | 0.366533931                        | 4.15E-05                           |
| 0.00093344                           | 0.062293561                          | 0.159565333                        | 3.023867207                        | 8.35E-06                           |
| 0.002743624                          | 0.114252699                          | 0.42715234                         | 1.040174735                        | 1.58E-05                           |
| 0.001681296                          | 0.16703409                           | 0.324941496                        | 1.530003868                        | 2.20E-05                           |
| 0.001801856                          | 0.162350272                          | 0.507753117                        | 0.92997525                         | 1.23E-05                           |
| 0.002649429                          | 0.33268679                           | 0.727651747                        | 0.584851357                        | 3.11E-05                           |
| 0.005007484                          | 0.502907003                          | 1.737732567                        | 0.279793952                        | 3.85E-05                           |
| 0.002537489                          | 0.195550162                          | 0.567552002                        | 0.878748401                        | 1.98E-05                           |
| 0.001528767                          | 0.14632683                           | 0.446509571                        | 1.078667298                        | 9.93E-06                           |
| 0.007225273                          | 0.375335558                          | 1.270767589                        | 0.38375785                         | 5.50E-05                           |
| 0.008059247                          | 0.597643539                          | 1.328220664                        | 0.329167511                        | 0.000124894                        |
| 0.004938106                          | 0.283499061                          | 1.073624978                        | 0.386579053                        | 3.51E-05                           |
| 0.002589028                          | 0.348113693                          | 0.967622979                        | 0.521779745                        | 2.06E-05                           |
| 0.001864957                          | 0.244707118                          | 0.509306079                        | 0.958144999                        | 2.01E-05                           |
| 0.001423364                          | 0.1163391                            | 0.281788198                        | 1.56965433                         | 1.38E-05                           |
| 0.005881017                          | 0.321996126                          | 1.081163808                        | 0.456375231                        | 3.95E-05                           |
| 0.004841905                          | 0.400013829                          | 1.166599313                        | 0.3939948                          | 4.41E-05                           |
| 0.003398479                          | 0.157996057                          | 0.555648746                        | 0.839902422                        | 2.95E-05                           |
| 0.001679703                          | 0.14318409                           | 0.391747815                        | 1.163488035                        | 1.46E-05                           |
| 0.002046311                          | 0.154742676                          | 0.596016711                        | 0.757529174                        | 1.04E-05                           |
| 0.004053529                          | 0.391573204                          | 1.1368366                          | 0.374599976                        | 2.90E-05                           |
| 0.000792012                          | 0.089133778                          | 0.233681501                        | 1.852148886                        | 5.66E-06                           |
| 0.003998682                          | 0.293986869                          | 1.173304152                        | 0.382957357                        | 2.27E-05                           |
| 0.002612007                          | 0.407123303                          | 1.243923045                        | 0.383653686                        | 1.57E-05                           |
| 0.001199731                          | 0.147608616                          | 0.447141013                        | 0.998734023                        | 7.84E-06                           |
| 0.000875668                          | 0.12162402                           | 0.381159059                        | 1.392140622                        | 4.68E-06                           |
| 0.007724493                          | 0.201229813                          | 0.753478953                        | 0.614453435                        | 5.87E-05                           |
| 0.001827395                          | 0.175321404                          | 0.684815857                        | 0.728395932                        | 8.14E-06                           |
| 0.005451306                          | 0.370933571                          | 1.275050439                        | 0.337217682                        | 3.26E-05                           |
| 0.001116894                          | 0.124682232                          | 0.373309321                        | 1.187301638                        | 7.12E-06                           |
| 0.001149313                          | 0.176534477                          | 0.577996434                        | 0.87174099                         | 6.03E-06                           |
| 0.002324537                          | 0.103515642                          | 0.477602739                        | 1.007545176                        | 1.13E-05                           |
| 0.005144349                          | 0.298583555                          | 0.89726757                         | 0.496818724                        | 4.37E-05                           |
| 0.001649989                          | 0.148551298                          | 0.597032915                        | 0.848592988                        | 7.76E-06                           |
| 0.003201739                          | 0.203794225                          | 0.649254703                        | 0.634190973                        | 2.55E-05                           |
| 0.002980019                          | 0.381935484                          | 0.76765798                         | 0.613055126                        | 3.58E-05                           |
| 0.002072431                          | 0.198024236                          | 0.414539167                        | 1.16621574                         | 2.39E-05                           |
| 0.004799233                          | 0.290513209                          | 0.874820735                        | 0.533279001                        | 4.00E-05                           |
| 0.002687831                          | 0.2093561                            | 0.808175616                        | 0.682969217                        | 1.32E-05                           |
| 0.006744385                          | 0.39322091                           | 1.288776164                        | 0.343601299                        | 5.74E-05                           |
| 0.003768633                          | 0.22239505                           | 0.745407462                        | 0.620774514                        | 2.70E-05                           |
| 0.002987392                          | 0.30564394                           | 0.73047422                         | 0.620403902                        | 2.89E-05                           |
| 0.00340324                           | 0.485553398                          | 1.080991347                        | 0.34844771                         | 4.25E-05                           |
| 0.003806456                          | 0.369419923                          | 0.971457494                        | 0.4910645                          | 3.09E-05                           |
| 0.002186034                          | 0.188019476                          | 0.751815978                        | 0.635615899                        | 9.81E-06                           |
| 0.002167578                          | 0.071348921                          | 0.284844436                        | 1.589989859                        | 1.28E-05                           |
| 0.002813809                          | 0.234474503                          | 0.584465056                        | 0.699944029                        | 2.70E-05                           |
| 0.004218804                          | 0.06575936                           | 0.613887773                        | 0.95678955                         | 1.13E-05                           |
| 0.00295599                           | 0.279092111                          | 0.728902276                        | 0.607976847                        | 2.38E-05                           |
| 0.002504337                          | 0.169246095                          | 0.535078227                        | 0.841985156                        | 1.93E-05                           |
| 0.004653336                          | 0.307970324                          | 1.124853915                        | 0.385390811                        | 3.11E-05                           |
| 0.003444864                          | 0.23143339                           | 0.975273549                        | 0.483002647                        | 1.66E-05                           |
| 0.004908986                          | 0.138692496                          | 0.870229644                        | 0.489836322                        | 2.19E-05                           |
| 0.002755397                          | 0.258308385                          | 0.602876498                        | 0.73665756                         | 2.88E-05                           |
| 0.001289738                          | 0.131876581                          | 0.330471261                        | 1.485357438                        | 1.08E-05                           |
| 0.002070626                          | 0.119145396                          | 0.453470602                        | 1.04186279                         | 1.21E-05                           |
| 0.001480894                          | 0.1688955                            | 0.424521605                        | 1.224481499                        | 1.22E-05                           |
| 0.00206275                           | 0.309237306                          | 1.119660788                        | 0.400778168                        | 1.10E-05                           |
| 0.002424234                          | 0.146952563                          | 0.449038593                        | 1.013668092                        | 1.78E-05                           |
| 0.0068422                            | 0.540485461                          | 1.609582846                        | 0.250548455                        | 6.35E-05                           |
| 0.008287285                          | 0.189235825                          | 0.723432257                        | 0.526752634                        | 5.86E-05                           |
| 0.001152698                          | 0.074088836                          | 0.369055015                        | 1.332161723                        | 4.44E-06                           |

| log.sigma.0.5.mm.3D_gldm_GrayLevelVariance | log.sigma.0.5.mm.3D_gldm_HighGrayLevelEmphasis | log.sigma.0.5.mm.3D_gldm_GrayLevelNonUniformityNormalized | log.sigma.0.5.mm.3D_gldm_DependenceEntropy |
|--------------------------------------------|------------------------------------------------|-----------------------------------------------------------|--------------------------------------------|
| 0.939564066                                | 44.1196984                                     | 0.323752066                                               | 5.272284415                                |
| 0.428750036                                | 13.89411765                                    | 0.466139724                                               | 4.717259783                                |
| 0.409419945                                | 13.80769231                                    | 0.459785072                                               | 4.856445642                                |
| 0.675168591                                | 21.39303992                                    | 0.392362097                                               | 5.236968845                                |
| 0.560205898                                | 21.82601351                                    | 0.426441803                                               | 5.07005479                                 |
| 0.862525253                                | 22.33030303                                    | 0.352203857                                               | 4.962164034                                |
| 0.512744098                                | 22.11360821                                    | 0.416562469                                               | 5.029399229                                |
| 0.580741037                                | 22.44753328                                    | 0.434379042                                               | 5.032209634                                |
| 0.590335988                                | 22.02727673                                    | 0.412565574                                               | 5.072299724                                |
| 0.668853726                                | 22.19776119                                    | 0.389793105                                               | 5.017497507                                |
| 0.411585162                                | 13.35344828                                    | 0.457789227                                               | 4.828115726                                |
| 0.811237666                                | 33.09631236                                    | 0.379240263                                               | 5.165780684                                |
| 0.509531975                                | 21.90573112                                    | 0.450448391                                               | 4.891082089                                |
| 0.700149826                                | 32.39895166                                    | 0.395473475                                               | 5.07778553                                 |
| 0.827519348                                | 32.58165323                                    | 0.369482066                                               | 5.192368905                                |
| 0.50445461                                 | 21.84437843                                    | 0.436374846                                               | 5.015165111                                |
| 0.565549692                                | 13.43886097                                    | 0.384871033                                               | 5.104334407                                |
| 0.429239441                                | 22.13138686                                    | 0.47688104                                                | 4.721694134                                |
| 0.46128333                                 | 21.71494607                                    | 0.434946736                                               | 4.848164438                                |
| 0.681320897                                | 22.34256588                                    | 0.38944182                                                | 5.119508731                                |
| 0.349548847                                | 13.66335979                                    | 0.480511289                                               | 4.807980656                                |
| 0.549518528                                | 13.74142725                                    | 0.407370124                                               | 4.994026716                                |
| 0.547118187                                | 21.92871094                                    | 0.412614822                                               | 5.010078101                                |
| 0.531020355                                | 22.06384586                                    | 0.407543935                                               | 5.062111951                                |
| 0.618078418                                | 22.60408484                                    | 0.404359934                                               | 4.968926103                                |
| 0.824008435                                | 33.51498523                                    | 0.361095307                                               | 5.336578228                                |
| 0.717813294                                | 22.42251779                                    | 0.367936153                                               | 5.299068589                                |
| 0.557378349                                | 21.80340333                                    | 0.42345953                                                | 5.078845709                                |
| 0.537253077                                | 13.8344519                                     | 0.403410257                                               | 4.908059693                                |
| 0.475272795                                | 22.08373905                                    | 0.471794177                                               | 4.815789868                                |
| 0.578324182                                | 32.68705338                                    | 0.433131713                                               | 5.038224127                                |
| 0.483749034                                | 21.37602707                                    | 0.450435565                                               | 4.870527457                                |
| 0.663533607                                | 21.9108083                                     | 0.382599873                                               | 5.388768419                                |
| 0.699076324                                | 22.20893617                                    | 0.390570213                                               | 5.130160447                                |
| 0.678816879                                | 22.89963669                                    | 0.387806663                                               | 5.188986585                                |
| 0.517014174                                | 22.07335779                                    | 0.430372311                                               | 4.92773295                                 |
| 0.639294933                                | 44.01289976                                    | 0.410541115                                               | 5.081489498                                |
| 0.535567289                                | 31.94419686                                    | 0.419468018                                               | 5.14303377                                 |
| 0.51154802                                 | 21.41056911                                    | 0.439459317                                               | 4.924679135                                |
| 0.560427242                                | 13.31623109                                    | 0.385520832                                               | 5.253531365                                |
| 0.462191678                                | 13.26060139                                    | 0.437242638                                               | 4.960885591                                |
| 0.735099279                                | 13.38013964                                    | 0.331374352                                               | 5.33559391                                 |
| 0.545461848                                | 21.99151382                                    | 0.421538863                                               | 5.067440488                                |
| 0.796843498                                | 21.85048232                                    | 0.36461575                                                | 5.166240189                                |
| 0.644916622                                | 33.09389671                                    | 0.431223229                                               | 4.920383379                                |
| 0.605213121                                | 14.07103825                                    | 0.394879247                                               | 5.112250855                                |
| 0.638779533                                | 22.16089434                                    | 0.399367975                                               | 5.110676995                                |
| 0.471493104                                | 13.83467279                                    | 0.48406954                                                | 4.727470388                                |
| 0.771484712                                | 14.1786134                                     | 0.370254943                                               | 4.942317699                                |
| 0.479853975                                | 22.65754438                                    | 0.446707267                                               | 4.879054194                                |
| 0.737186998                                | 22.7493188                                     | 0.380204223                                               | 5.091536743                                |
| 0.730086422                                | 22.01690893                                    | 0.35234508                                                | 5.25338572                                 |
| 0.595334231                                | 21.85904255                                    | 0.391825404                                               | 5.061954519                                |
| 0.464319471                                | 13.96195652                                    | 0.45119854                                                | 4.916857431                                |
| 0.65393691                                 | 22.5887218                                     | 0.408724066                                               | 4.936424697                                |
| 0.492498356                                | 13.58205128                                    | 0.437432742                                               | 4.875651758                                |
| 0.613031333                                | 22.23955501                                    | 0.392176091                                               | 5.158716209                                |
| 0.529439116                                | 21.39039907                                    | 0.421678668                                               | 4.978775162                                |
| 0.599160721                                | 21.81614078                                    | 0.417096481                                               | 5.005309815                                |
| 0.698708586                                | 21.36937233                                    | 0.354670494                                               | 5.299496317                                |
| 0.576362178                                | 22.39467724                                    | 0.433928784                                               | 5.022409199                                |
| 0.75298241                                 | 32.71835206                                    | 0.386382752                                               | 5.141554079                                |
| 0.685510947                                | 33.06080497                                    | 0.381105468                                               | 5.203230781                                |
| 0.643510807                                | 21.92824347                                    | 0.402081899                                               | 5.177102072                                |
| 0.341530203                                | 13.53037975                                    | 0.493510655                                               | 4.596144379                                |
| 0.561669949                                | 21.80942517                                    | 0.42724822                                                | 5.041090717                                |
| 0.566597821                                | 21.38650307                                    | 0.429246726                                               | 4.871922858                                |
| 0.644729062                                | 31.93488                                       | 0.392003686                                               | 5.187155637                                |
| 0.647359939                                | 32.45603551                                    | 0.400665086                                               | 5.230258125                                |
| 0.403197203                                | 21.6973775                                     | 0.467405474                                               | 4.756549868                                |
| 0.531000041                                | 13.54426482                                    | 0.423927093                                               | 4.89106198                                 |
| 0.587645199                                | 22.5988345                                     | 0.430146978                                               | 5.065829835                                |
| 0.622597419                                | 22.12549364                                    | 0.400717889                                               | 5.148908231                                |
| 0.825865002                                | 21.71226206                                    | 0.334601195                                               | 5.323659721                                |
| 0.68475505                                 | 13.48291281                                    | 0.353155987                                               | 5.254827019                                |
| 0.511750929                                | 13.39567809                                    | 0.433370128                                               | 4.882928707                                |
| 0.471554392                                | 22.2090985                                     | 0.451308316                                               | 4.904244651                                |
| 0.544414468                                | 21.81210856                                    | 0.441150448                                               | 4.786464369                                |
| 0.47720455                                 | 21.76567077                                    | 0.433713964                                               | 4.990303076                                |
| 0.7227072                                  | 21.5754596                                     | 0.365524013                                               | 5.379437869                                |
| 0.913931601                                | 44.23931624                                    | 0.331905672                                               | 5.275441654                                |
| 0.687445715                                | 21.50416898                                    | 0.389901313                                               | 5.164170896                                |
| 0.561955188                                | 21.84765983                                    | 0.418044178                                               | 5.126427033                                |
| 0.344525749                                | 13.40123658                                    | 0.479363898                                               | 4.947814721                                |
| 0.673875611                                | 21.70807708                                    | 0.381825774                                               | 5.254258728                                |
| 0.273866394                                | 13.6116188                                     | 0.547035735                                               | 4.649747049                                |
| 0.658031284                                | 21.31572327                                    | 0.379243261                                               | 5.200812949                                |
| 0.571119831                                | 22.88657914                                    | 0.412998014                                               | 5.077570181                                |
| 0.527658336                                | 22.20355191                                    | 0.454737003                                               | 4.922771178                                |
| 0.495732724                                | 22.1308642                                     | 0.466263314                                               | 4.919334622                                |
| 0.37100039                                 | 22.23236196                                    | 0.469946178                                               | 4.734930834                                |
| 0.639235915                                | 22.40134341                                    | 0.368571028                                               | 5.136272104                                |
| 0.656071592                                | 21.69766544                                    | 0.382455347                                               | 5.130248412                                |
| 0.488989807                                | 22.26393939                                    | 0.439951148                                               | 4.978901629                                |
| 0.609978118                                | 21.49563419                                    | 0.379654406                                               | 5.225873794                                |
| 0.742692196                                | 45.24430158                                    | 0.392252182                                               | 5.137876726                                |
| 0.521238452                                | 13.39652112                                    | 0.411561657                                               | 5.095753605                                |
| 0.689021893                                | 21.64565425                                    | 0.394507799                                               | 5.025675891                                |
| 0.370450402                                | 13.19784173                                    | 0.475544744                                               | 4.693157882                                |
| 0.444244855                                | 22.27000346                                    | 0.45014067                                                | 4.914419445                                |

| log.sigma.0.5.mm.3D_gldm_DependenceNonUniformity | log.sigma.0.5.mm.3D_gldm_GrayLevelNonUniformity | log.sigma.0.5.mm.3D_gldm_SmallDependenceEmphasis |
|--------------------------------------------------|-------------------------------------------------|--------------------------------------------------|
| 149.2591894                                      | 687.001885                                      | 0.093379989                                      |
| 63.09197861                                      | 435.8406417                                     | 0.053426136                                      |
| 98.83441982                                      | 705.3102999                                     | 0.048328559                                      |
| 61.18628454                                      | 383.3377687                                     | 0.060559956                                      |
| 139.160473                                       | 1009.814189                                     | 0.064846258                                      |
| 50.59090909                                      | 232.4545455                                     | 0.08116068                                       |
| 373.7573881                                      | 2353.994514                                     | 0.055941632                                      |
| 294.6898982                                      | 2218.808144                                     | 0.061259939                                      |
| 275.1007479                                      | 1875.523097                                     | 0.068818145                                      |
| 70.71455224                                      | 417.858209                                      | 0.083940702                                      |
| 101.9708223                                      | 690.3461538                                     | 0.051410595                                      |
| 144.4308026                                      | 874.1488069                                     | 0.081371855                                      |
| 126.5179432                                      | 840.9871452                                     | 0.044409789                                      |
| 107.6790914                                      | 679.0279557                                     | 0.063702689                                      |
| 127.0524194                                      | 733.0524194                                     | 0.082926854                                      |
| 274.5690128                                      | 1909.576325                                     | 0.052697754                                      |
| 86.51758794                                      | 459.5360134                                     | 0.062583548                                      |
| 80.03325223                                      | 587.9943228                                     | 0.04529734                                       |
| 92.04930663                                      | 564.5608629                                     | 0.059966927                                      |
| 337.8459319                                      | 2024.708021                                     | 0.072999784                                      |
| 210.2592593                                      | 1453.066138                                     | 0.031422679                                      |
| 71.53012048                                      | 439.5523633                                     | 0.066834454                                      |
| 67.6484375                                       | 422.5175781                                     | 0.063310562                                      |
| 187.6173026                                      | 1078.768795                                     | 0.061477532                                      |
| 83.717989                                        | 514.7501964                                     | 0.065335163                                      |
| 149.3343183                                      | 855.4347826                                     | 0.087300808                                      |
| 200.915249                                       | 1189.537581                                     | 0.067694904                                      |
| 172.5611875                                      | 1169.595221                                     | 0.056763844                                      |
| 32.74049217                                      | 180.3243848                                     | 0.068047494                                      |
| 128.5316456                                      | 969.0652386                                     | 0.058737825                                      |
| 278.7822615                                      | 2060.840689                                     | 0.058895687                                      |
| 135.8912518                                      | 931.9511841                                     | 0.046668774                                      |
| 192.6308455                                      | 1235.414989                                     | 0.065231412                                      |
| 147.2961702                                      | 917.84                                          | 0.068704476                                      |
| 268.1257947                                      | 1707.900545                                     | 0.075348577                                      |
| 203.3134378                                      | 1290.686562                                     | 0.050299709                                      |
| 252.3136254                                      | 1527.623488                                     | 0.057222084                                      |
| 339.8761868                                      | 2164.874443                                     | 0.04266113                                       |
| 78.70569106                                      | 540.5349593                                     | 0.061497673                                      |
| 480.7568088                                      | 2802.736451                                     | 0.063515767                                      |
| 168.5512722                                      | 1134.207402                                     | 0.044485707                                      |
| 279.4370313                                      | 1281.424619                                     | 0.079578702                                      |
| 227.2879825                                      | 1539.881467                                     | 0.059500091                                      |
| 161.3432476                                      | 907.1639871                                     | 0.08094743                                       |
| 77.52425665                                      | 551.1032864                                     | 0.076181138                                      |
| 178.424408                                       | 1083.943534                                     | 0.068782257                                      |
| 287.7308198                                      | 1821.916703                                     | 0.066324711                                      |
| 53.6268567                                       | 421.6245695                                     | 0.065883041                                      |
| 59.30082256                                      | 315.0869565                                     | 0.08194748                                       |
| 87.29142012                                      | 603.9482249                                     | 0.060574105                                      |
| 167.3425457                                      | 976.7446477                                     | 0.073050344                                      |
| 231.7878968                                      | 1187.755265                                     | 0.084052629                                      |
| 298.6702128                                      | 1767.916223                                     | 0.070912322                                      |
| 69.98550725                                      | 498.1231884                                     | 0.053319771                                      |
| 86.62556391                                      | 543.6030075                                     | 0.072131454                                      |
| 131.5825641                                      | 852.9938462                                     | 0.052185491                                      |
| 249.7470952                                      | 1586.352287                                     | 0.064954708                                      |
| 243.2903412                                      | 1458.164835                                     | 0.052222451                                      |
| 104.663835                                       | 687.375                                         | 0.078885028                                      |
| 650.2974039                                      | 3237.786943                                     | 0.068900459                                      |
| 106.3782559                                      | 766.3182333                                     | 0.061709412                                      |
| 167.247191                                       | 1031.641948                                     | 0.070661057                                      |
| 361.2442563                                      | 2206.219554                                     | 0.0705872                                        |
| 478.7754165                                      | 3065.070314                                     | 0.070350934                                      |
| 58.21012658                                      | 389.8734177                                     | 0.046892649                                      |
| 252.1165199                                      | 1650.032626                                     | 0.054076842                                      |
| 86.00306748                                      | 559.7377301                                     | 0.057352551                                      |
| 394.46144                                        | 2450.02304                                      | 0.064898908                                      |
| 357.7625064                                      | 2346.695407                                     | 0.086661774                                      |
| 207.0904072                                      | 1354.541063                                     | 0.041516673                                      |
| 84.69822941                                      | 550.6812933                                     | 0.055571669                                      |
| 255.1431235                                      | 1845.330536                                     | 0.059159082                                      |
| 143.546731                                       | 913.2360685                                     | 0.06275101                                       |
| 155.3116423                                      | 755.8640992                                     | 0.076768879                                      |
| 215.6962632                                      | 1105.731396                                     | 0.07470955                                       |
| 89.29955291                                      | 581.5827124                                     | 0.057530967                                      |
| 159.3823038                                      | 1081.334725                                     | 0.058183826                                      |
| 67.03340292                                      | 422.6221294                                     | 0.061965451                                      |
| 114.3848858                                      | 740.3497364                                     | 0.056893504                                      |
| 142.9572467                                      | 854.960667                                      | 0.077695821                                      |
| 140.5455003                                      | 660.1603821                                     | 0.096275433                                      |
| 113.7426348                                      | 701.4324625                                     | 0.070216647                                      |
| 204.2132151                                      | 1366.586418                                     | 0.057329351                                      |
| 203.1705174                                      | 1473.085259                                     | 0.040505987                                      |
| 150.2439524                                      | 931.2730627                                     | 0.068941526                                      |
| 96.19321149                                      | 838.0587467                                     | 0.02455657                                       |
| 154.2201258                                      | 904.4951782                                     | 0.06570689                                       |
| 166.2363239                                      | 1132.440554                                     | 0.063015099                                      |
| 95.07786885                                      | 665.7349727                                     | 0.072441039                                      |
| 117.982716                                       | 944.1832099                                     | 0.062317948                                      |
| 90.86042945                                      | 612.809816                                      | 0.034628073                                      |
| 165.6003359                                      | 877.9361881                                     | 0.080454161                                      |
| 346.1811692                                      | 1982.266062                                     | 0.068124889                                      |
| 204.4290909                                      | 1451.838788                                     | 0.057692143                                      |
| 287.7012868                                      | 1652.255974                                     | 0.068635444                                      |
| 212.7971946                                      | 1342.286967                                     | 0.069024755                                      |
| 186.9481718                                      | 1159.369187                                     | 0.056233625                                      |
| 68.47086915                                      | 413.0496657                                     | 0.067619653                                      |
| 57.00479616                                      | 396.6043165                                     | 0.039756633                                      |
| 370.2868029                                      | 2599.112227                                     | 0.047719375                                      |

| log.sigma.0.5.mm.3D_gldm_DependenceNonUniformityNormalized | log.sigma.0.5.mm.3D_gldm_DependenceVariance | log.sigma.0.5.mm.3D_gldm_LargeDependenceEmphasis |
|------------------------------------------------------------|---------------------------------------------|--------------------------------------------------|
| 0.07038921                                                 | 15.7467774                                  | 69.86145146                                      |
| 0.067478052                                                | 16.83433212                                 | 102.0459893                                      |
| 0.064429218                                                | 18.0657619                                  | 109.7457627                                      |
| 0.062626699                                                | 19.26363054                                 | 98.50460594                                      |
| 0.058767092                                                | 21.57809005                                 | 107.25                                           |
| 0.076652893                                                | 13.21651974                                 | 69.64848485                                      |
| 0.066140044                                                | 17.12248993                                 | 98.52433198                                      |
| 0.057691836                                                | 22.13255145                                 | 111.7364918                                      |
| 0.060514903                                                | 20.36002237                                 | 101.0514738                                      |
| 0.065965067                                                | 17.35052002                                 | 83.9738806                                       |
| 0.067619909                                                | 16.77977401                                 | 102.6246684                                      |
| 0.062659784                                                | 19.6147927                                  | 87.91193059                                      |
| 0.067765369                                                | 16.62676446                                 | 109.8366363                                      |
| 0.062713507                                                | 18.82495813                                 | 97.32847991                                      |
| 0.064038518                                                | 18.93367809                                 | 87.27923387                                      |
| 0.06274429                                                 | 18.57081087                                 | 108.7166362                                      |
| 0.072460291                                                | 14.37498772                                 | 83.09547739                                      |
| 0.064909369                                                | 17.9235027                                  | 116.6139497                                      |
| 0.070916261                                                | 15.94070764                                 | 97.8027735                                       |
| 0.064982868                                                | 17.71707093                                 | 91.27928448                                      |
| 0.069530178                                                | 16.05483119                                 | 118.1289683                                      |
| 0.066292975                                                | 17.56953586                                 | 87.09638554                                      |
| 0.066062927                                                | 17.23611069                                 | 95.27539063                                      |
| 0.070879223                                                | 15.20220523                                 | 89.25840574                                      |
| 0.065764328                                                | 17.44758656                                 | 92.56323645                                      |
| 0.063036859                                                | 19.54652798                                 | 86.14563107                                      |
| 0.062145144                                                | 19.4231543                                  | 93.24064337                                      |
| 0.062476896                                                | 19.00457067                                 | 104.577118                                       |
| 0.073244949                                                | 14.85510663                                 | 76.901566                                        |
| 0.062576264                                                | 19.53570159                                 | 109.3330088                                      |
| 0.058592321                                                | 21.28651429                                 | 112.4211854                                      |
| 0.065679677                                                | 17.34813553                                 | 110.5746738                                      |
| 0.059656502                                                | 21.22872109                                 | 102.89904                                        |
| 0.062679221                                                | 18.77781802                                 | 95.32170213                                      |
| 0.060882333                                                | 20.58109546                                 | 93.55086285                                      |
| 0.067793744                                                | 16.32540134                                 | 102.7552518                                      |
| 0.067808015                                                | 16.4720385                                  | 100.6468691                                      |
| 0.065854716                                                | 17.09711964                                 | 108.4086417                                      |
| 0.063988367                                                | 18.60901844                                 | 105.0536585                                      |
| 0.06612886                                                 | 17.25765708                                 | 92.77303989                                      |
| 0.06497736                                                 | 17.6685079                                  | 109.692367                                       |
| 0.072261968                                                | 14.89545115                                 | 71.1939488                                       |
| 0.062219541                                                | 19.18956875                                 | 101.4757733                                      |
| 0.064848572                                                | 18.29665223                                 | 83.87540193                                      |
| 0.060660608                                                | 21.01470657                                 | 102.9186228                                      |
| 0.064999784                                                | 17.54192003                                 | 90.41566485                                      |
| 0.063071201                                                | 18.71191423                                 | 95.92985533                                      |
| 0.061569306                                                | 20.67959417                                 | 112.9586682                                      |
| 0.069683693                                                | 15.83628854                                 | 75.85781434                                      |
| 0.06456466                                                 | 18.08239382                                 | 102.3091716                                      |
| 0.065139177                                                | 17.63409614                                 | 87.82444531                                      |
| 0.068759388                                                | 16.2558798                                  | 77.23079205                                      |
| 0.066194639                                                | 16.9494673                                  | 87.7748227                                       |
| 0.06339267                                                 | 19.0675508                                  | 111.0815217                                      |
| 0.065132003                                                | 17.6947278                                  | 91.60300752                                      |
| 0.067478238                                                | 16.82667613                                 | 101.014359                                       |
| 0.061742174                                                | 19.91216026                                 | 94.51990111                                      |
| 0.070355796                                                | 15.70443705                                 | 102.4129555                                      |
| 0.063509609                                                | 18.93666786                                 | 97.35800971                                      |
| 0.071234243                                                | 14.74846011                                 | 78.8413846                                       |
| 0.060236838                                                | 20.58866676                                 | 105.0079275                                      |
| 0.062639397                                                | 19.05737267                                 | 92.25917603                                      |
| 0.062401841                                                | 19.74954161                                 | 91.40317844                                      |
| 0.062806692                                                | 19.22616159                                 | 100.4293585                                      |
| 0.073683705                                                | 15.02479731                                 | 107.6227848                                      |
| 0.065281336                                                | 17.74697654                                 | 104.6970482                                      |
| 0.065953273                                                | 17.50157844                                 | 102.7239264                                      |
| 0.06311383                                                 | 18.65800151                                 | 94.98688                                         |
| 0.061082893                                                | 21.03695413                                 | 89.17483353                                      |
| 0.071459768                                                | 15.1426471                                  | 108.3071084                                      |
| 0.06520264                                                 | 17.77096019                                 | 100.7505774                                      |
| 0.059473922                                                | 20.92505387                                 | 111.2149184                                      |
| 0.062986718                                                | 18.62482275                                 | 99.08863537                                      |
| 0.068752387                                                | 16.49904675                                 | 76.7521027                                       |
| 0.068890534                                                | 16.00515446                                 | 78.58735228                                      |
| 0.066542141                                                | 16.93104804                                 | 95.71982116                                      |
| 0.06652016                                                 | 17.17914805                                 | 102.4716194                                      |
| 0.069972237                                                | 15.98649326                                 | 97.55114823                                      |
| 0.067009306                                                | 17.12701242                                 | 98.31693029                                      |
| 0.06111896                                                 | 20.68524331                                 | 91.94655836                                      |
| 0.070661388                                                | 15.65354295                                 | 68.42584213                                      |
| 0.063225478                                                | 18.84667197                                 | 93.85825459                                      |
| 0.062469628                                                | 18.76767667                                 | 101.0501682                                      |
| 0.066114714                                                | 17.52635368                                 | 121.9410999                                      |
| 0.061600637                                                | 20.18032649                                 | 94.19393194                                      |
| 0.062789303                                                | 19.15431968                                 | 148.6266319                                      |
| 0.064662527                                                | 17.74019382                                 | 90.83731656                                      |
| 0.060625939                                                | 20.24054966                                 | 100.5200584                                      |
| 0.064943899                                                | 18.17953656                                 | 100.0177596                                      |
| 0.05826307                                                 | 22.20528188                                 | 117.5303704                                      |
| 0.069678243                                                | 15.5329143                                  | 109.7300613                                      |
| 0.069521552                                                | 16.08113961                                 | 76.89756507                                      |
| 0.066791659                                                | 16.63469857                                 | 87.77869959                                      |
| 0.061948209                                                | 19.08188099                                 | 105.3690909                                      |
| 0.066107832                                                | 17.26453017                                 | 88.953125                                        |
| 0.062185036                                                | 19.08038405                                 | 95.24196376                                      |
| 0.066364278                                                | 16.81292835                                 | 95.00070998                                      |
| 0.065397201                                                | 17.74106033                                 | 93.63228271                                      |
| 0.068351075                                                | 16.65910437                                 | 110.4748201                                      |
| 0.064130032                                                | 17.91190302                                 | 109.5857291                                      |

| log.sigma.0.5.mm.3D_gldm_LargeDependenceLowGrayLevelEmphasis | log.sigma.0.5.mm.3D_gldm_SmallDependenceHighGrayLevelEmphasis | log.sigma.0.5.mm.3D_gldm_LargeDependenceHighGrayLevelEmphasis |
|--------------------------------------------------------------|---------------------------------------------------------------|---------------------------------------------------------------|
| 1.555107348                                                  | 3.889739988                                                   | 3230.836004                                                   |
| 7.049910873                                                  | 0.631695321                                                   | 1544.163636                                                   |
| 7.784120672                                                  | 0.606459107                                                   | 1628.722947                                                   |
| 4.537735548                                                  | 1.180300372                                                   | 2261.038895                                                   |
| 4.652812845                                                  | 1.190954373                                                   | 2553.516892                                                   |
| 3.210402404                                                  | 1.875945115                                                   | 1590.539394                                                   |
| 4.412123037                                                  | 1.209532554                                                   | 2285.52504                                                    |
| 4.777736148                                                  | 1.2000814                                                     | 2684.646829                                                   |
| 4.434119472                                                  | 1.382740023                                                   | 2384.256049                                                   |
| 3.697804176                                                  | 1.682674545                                                   | 1979.06903                                                    |
| 7.421690429                                                  | 0.680952497                                                   | 1503.531167                                                   |
| 2.599337728                                                  | 2.405246618                                                   | 3046.295445                                                   |
| 4.88532469                                                   | 0.855307728                                                   | 2562.573112                                                   |
| 2.916013872                                                  | 1.933400076                                                   | 3341.295865                                                   |
| 2.615269239                                                  | 2.467746916                                                   | 2998.672379                                                   |
| 4.82684374                                                   | 1.015056478                                                   | 2539.021709                                                   |
| 6.602897822                                                  | 0.967492589                                                   | 1144.663317                                                   |
| 5.023590596                                                  | 0.764771844                                                   | 2778.38605                                                    |
| 4.391436332                                                  | 1.244217134                                                   | 2258.802773                                                   |
| 4.075195081                                                  | 1.513595765                                                   | 2130.435276                                                   |
| 8.498006871                                                  | 0.42735331                                                    | 1736.326058                                                   |
| 6.26520415                                                   | 0.821511538                                                   | 1289.683967                                                   |
| 4.259442656                                                  | 1.313738812                                                   | 2214.963867                                                   |
| 4.088462933                                                  | 1.289108955                                                   | 2036.468833                                                   |
| 4.047946639                                                  | 1.388924055                                                   | 2192.02121                                                    |
| 2.594360306                                                  | 2.90956588                                                    | 2946.562685                                                   |
| 4.167983438                                                  | 1.435815638                                                   | 2181.471698                                                   |
| 4.659694247                                                  | 1.171217695                                                   | 2440.568067                                                   |
| 5.652854835                                                  | 0.939695574                                                   | 1119.973154                                                   |
| 4.678415387                                                  | 1.063480419                                                   | 2620.703992                                                   |
| 3.311275816                                                  | 1.638275182                                                   | 3891.733291                                                   |
| 4.913036412                                                  | 0.87521649                                                    | 2583.639923                                                   |
| 4.74576473                                                   | 1.487060061                                                   | 2342.013007                                                   |
| 4.23559198                                                   | 1.419555645                                                   | 2241.161277                                                   |
| 4.042345752                                                  | 1.641253667                                                   | 2240.277475                                                   |
| 4.576350267                                                  | 1.014213229                                                   | 2396.94965                                                    |
| 2.23805674                                                   | 2.227383042                                                   | 4621.726955                                                   |
| 3.368612564                                                  | 1.26597746                                                    | 3596.740167                                                   |
| 4.670055887                                                  | 1.145939244                                                   | 2446.773171                                                   |
| 7.422603699                                                  | 0.899380704                                                   | 1265.986933                                                   |
| 8.059048231                                                  | 0.586819134                                                   | 1599.40478                                                    |
| 6.028985179                                                  | 1.227279126                                                   | 940.4497026                                                   |
| 4.462628284                                                  | 1.18875117                                                    | 2392.168355                                                   |
| 3.763614157                                                  | 1.695251918                                                   | 1963.503215                                                   |
| 2.99499538                                                   | 2.249325924                                                   | 3595.247261                                                   |
| 6.569961518                                                  | 1.020867586                                                   | 1333.075774                                                   |
| 4.258003788                                                  | 1.509499088                                                   | 2247.580009                                                   |
| 7.679972892                                                  | 0.89037361                                                    | 1725.409874                                                   |
| 5.450890935                                                  | 1.135609214                                                   | 1153.410106                                                   |
| 4.410058132                                                  | 1.22430991                                                    | 2440.45784                                                    |
| 3.853671104                                                  | 1.561692479                                                   | 2081.924095                                                   |
| 3.572298015                                                  | 1.913660348                                                   | 1760.068526                                                   |
| 3.937057701                                                  | 1.475417529                                                   | 2039.303635                                                   |
| 7.878112419                                                  | 0.628437869                                                   | 1650.230072                                                   |
| 3.994925886                                                  | 1.489602448                                                   | 2172.468421                                                   |
| 7.325717379                                                  | 0.673883174                                                   | 1483.021026                                                   |
| 4.164039282                                                  | 1.312104648                                                   | 2227.357973                                                   |
| 4.693386652                                                  | 1.048488803                                                   | 2339.801041                                                   |
| 4.323499071                                                  | 1.607546716                                                   | 2272.846481                                                   |
| 3.902040854                                                  | 1.540448779                                                   | 1697.105378                                                   |
| 4.525172675                                                  | 1.294179266                                                   | 2509.738958                                                   |
| 2.750752336                                                  | 2.098853617                                                   | 3173.740824                                                   |
| 2.707037259                                                  | 2.140236191                                                   | 3162.226809                                                   |
| 4.499609104                                                  | 1.432479449                                                   | 2334.374524                                                   |
| 7.627405767                                                  | 0.568489595                                                   | 1595.046835                                                   |
| 4.67120596                                                   | 1.059335838                                                   | 2442.591403                                                   |
| 4.576530104                                                  | 1.077230452                                                   | 2393.141104                                                   |
| 2.883868752                                                  | 1.875481925                                                   | 3219.3752                                                     |
| 2.659588345                                                  | 2.705046498                                                   | 3064.328325                                                   |
| 4.82829413                                                   | 0.749058935                                                   | 2514.549689                                                   |
| 7.228390856                                                  | 0.685316362                                                   | 1493.337952                                                   |
| 4.789097798                                                  | 1.168183274                                                   | 2664.015152                                                   |
| 4.402365543                                                  | 1.299064678                                                   | 2322.92409                                                    |
| 3.581109634                                                  | 1.642780253                                                   | 1755.811421                                                   |
| 6.188228953                                                  | 1.040983914                                                   | 1100.395081                                                   |
| 7.008267304                                                  | 0.704290137                                                   | 1412.577496                                                   |
| 4.538780773                                                  | 1.335933957                                                   | 2391.295075                                                   |
| 4.306347833                                                  | 1.167848052                                                   | 2287.864301                                                   |
| 4.391758034                                                  | 1.129468329                                                   | 2283.927358                                                   |
| 4.318984183                                                  | 1.751637826                                                   | 2065.038478                                                   |
| 1.519400461                                                  | 3.984508991                                                   | 3168.110608                                                   |
| 4.237639749                                                  | 1.475034096                                                   | 2173.823235                                                   |
| 4.544115631                                                  | 1.171873038                                                   | 2339.918018                                                   |
| 9.024066511                                                  | 0.507989461                                                   | 1752.445818                                                   |
| 4.233337029                                                  | 1.411373415                                                   | 2191.280033                                                   |
| 10.24360748                                                  | 0.210037859                                                   | 2242.244778                                                   |
| 4.180693488                                                  | 1.353187266                                                   | 2076.495597                                                   |
| 4.327688838                                                  | 1.385349288                                                   | 2408.539387                                                   |
| 4.36762795                                                   | 1.507230072                                                   | 2363.916667                                                   |
| 5.017276115                                                  | 1.2094386                                                     | 2822.860741                                                   |
| 4.820839398                                                  | 0.628765905                                                   | 2576.786043                                                   |
| 3.48211997                                                   | 1.699154431                                                   | 1776.026868                                                   |
| 4.000153754                                                  | 1.495922261                                                   | 2020.103222                                                   |
| 4.597247044                                                  | 1.234944958                                                   | 2496.103333                                                   |
| 4.180936538                                                  | 1.498359173                                                   | 1991.974494                                                   |
| 2.052497469                                                  | 2.8495932                                                     | 4500.351257                                                   |
| 7.159763046                                                  | 0.774842745                                                   | 1360.405396                                                   |
| 4.193111758                                                  | 1.174702393                                                   | 2186.354346                                                   |
| 7.898036904                                                  | 0.46811785                                                    | 1631.711031                                                   |
| 4.778549701                                                  | 0.887152202                                                   | 2591.455317                                                   |

| log.sigma.0.5.mm.3D_gldm_SmallDependenceLowGrayLevelEmphasis | log.sigma.0.5.mm.3D_gldm_LowGrayLevelEmphasis | log.sigma.0.5.mm.3D_gldm_DistanceZoneVariabilityNormalized |
|--------------------------------------------------------------|-----------------------------------------------|------------------------------------------------------------|
| 0.00365589                                                   | 0.025613836                                   | 0.988571806                                                |
| 0.010928376                                                  | 0.087824718                                   | 1                                                          |
| 0.008905069                                                  | 0.085613864                                   | 1                                                          |
| 0.006345432                                                  | 0.058585087                                   | 1                                                          |
| 0.005905445                                                  | 0.053080065                                   | 1                                                          |
| 0.010389457                                                  | 0.057902426                                   | 1                                                          |
| 0.004208681                                                  | 0.0507137                                     | 0.992337278                                                |
| 0.006794315                                                  | 0.052425666                                   | 1                                                          |
| 0.006584455                                                  | 0.053047229                                   | 1                                                          |
| 0.009114064                                                  | 0.054663629                                   | 1                                                          |
| 0.009727403                                                  | 0.090276488                                   | 1                                                          |
| 0.005101883                                                  | 0.03543853                                    | 1                                                          |
| 0.005478084                                                  | 0.05353978                                    | 1                                                          |
| 0.003989197                                                  | 0.035158366                                   | 1                                                          |
| 0.004990315                                                  | 0.035722035                                   | 1                                                          |
| 0.005475438                                                  | 0.053021958                                   | 1                                                          |
| 0.009106774                                                  | 0.092763354                                   | 1                                                          |
| 0.005774129                                                  | 0.051196255                                   | 1                                                          |
| 0.005141051                                                  | 0.05152818                                    | 1                                                          |
| 0.009342416                                                  | 0.055726445                                   | 0.994100347                                                |
| 0.00403436                                                   | 0.08310718                                    | 1                                                          |
| 0.013398277                                                  | 0.094101277                                   | 1                                                          |
| 0.005749113                                                  | 0.052577964                                   | 1                                                          |
| 0.005655721                                                  | 0.05178002                                    | 1                                                          |
| 0.007107958                                                  | 0.052890858                                   | 1                                                          |
| 0.004418545                                                  | 0.034053656                                   | 1                                                          |
| 0.007388443                                                  | 0.054135622                                   | 1                                                          |
| 0.005558014                                                  | 0.05420073                                    | 1                                                          |
| 0.012019026                                                  | 0.090314442                                   | 1                                                          |
| 0.006641443                                                  | 0.052289482                                   | 1                                                          |
| 0.003627614                                                  | 0.033998407                                   | 1                                                          |
| 0.004308135                                                  | 0.053539875                                   | 1                                                          |
| 0.006112958                                                  | 0.05389238                                    | 1                                                          |
| 0.007872658                                                  | 0.056593153                                   | 1                                                          |
| 0.006852435                                                  | 0.05181213                                    | 1                                                          |
| 0.004939687                                                  | 0.051805267                                   | 1                                                          |
| 0.002479009                                                  | 0.024799535                                   | 1                                                          |
| 0.002764327                                                  | 0.034529263                                   | 1                                                          |
| 0.006854784                                                  | 0.054533304                                   | 1                                                          |
| 0.011070686                                                  | 0.095063121                                   | 0.9950125                                                  |
| 0.008434692                                                  | 0.092450099                                   | 1                                                          |
| 0.013735264                                                  | 0.100150739                                   | 1                                                          |
| 0.005755704                                                  | 0.052595981                                   | 1                                                          |
| 0.008876491                                                  | 0.059824416                                   | 1                                                          |
| 0.005048908                                                  | 0.034455687                                   | 1                                                          |
| 0.01225667                                                   | 0.092257814                                   | 1                                                          |
| 0.005448863                                                  | 0.053056392                                   | 1                                                          |
| 0.013899648                                                  | 0.092364779                                   | 1                                                          |
| 0.018710245                                                  | 0.103034818                                   | 1                                                          |
| 0.005279949                                                  | 0.049735975                                   | 1                                                          |
| 0.008415858                                                  | 0.054800444                                   | 1                                                          |
| 0.007040546                                                  | 0.054242031                                   | 1                                                          |
| 0.005965652                                                  | 0.052838504                                   | 1                                                          |
| 0.012289091                                                  | 0.087740036                                   | 1                                                          |
| 0.00730463                                                   | 0.053517697                                   | 1                                                          |
| 0.010798935                                                  | 0.094791738                                   | 1                                                          |
| 0.00563435                                                   | 0.052248782                                   | 1                                                          |
| 0.005598249                                                  | 0.054172109                                   | 1                                                          |
| 0.008106013                                                  | 0.054596561                                   | 1                                                          |
| 0.006780934                                                  | 0.05621241                                    | 1                                                          |
| 0.005917561                                                  | 0.052405253                                   | 1                                                          |
| 0.005216989                                                  | 0.035716694                                   | 1                                                          |
| 0.00368683                                                   | 0.033767816                                   | 0.98870093                                                 |
| 0.008316129                                                  | 0.055406283                                   | 0.987654797                                                |
| 0.007145955                                                  | 0.084598453                                   | 1                                                          |
| 0.006282346                                                  | 0.054628796                                   | 0.977780583                                                |
| 0.007359819                                                  | 0.055982947                                   | 1                                                          |
| 0.003360964                                                  | 0.034817598                                   | 0.988920011                                                |
| 0.004010308                                                  | 0.03458248                                    | 1                                                          |
| 0.003910492                                                  | 0.051008262                                   | 1                                                          |
| 0.011745959                                                  | 0.097167265                                   | 1                                                          |
| 0.00705871                                                   | 0.053461323                                   | 0.990654412                                                |
| 0.005751866                                                  | 0.052708137                                   | 1                                                          |
| 0.007076457                                                  | 0.057344885                                   | 1                                                          |
| 0.013923004                                                  | 0.100512214                                   | 0.990521542                                                |
| 0.012625154                                                  | 0.096100969                                   | 1                                                          |
| 0.00435888                                                   | 0.0500848                                     | 1                                                          |
| 0.008575577                                                  | 0.054938648                                   | 1                                                          |
| 0.004841075                                                  | 0.051919461                                   | 1                                                          |
| 0.006907367                                                  | 0.056525853                                   | 1                                                          |
| 0.003793534                                                  | 0.02551665                                    | 1                                                          |
| 0.007588514                                                  | 0.056775872                                   | 1                                                          |
| 0.006816131                                                  | 0.054143364                                   | 1                                                          |
| 0.006227551                                                  | 0.085251925                                   | 1                                                          |
| 0.006364541                                                  | 0.054899447                                   | 1                                                          |
| 0.005050525                                                  | 0.082851755                                   | 1                                                          |
| 0.00690528                                                   | 0.05639733                                    | 1                                                          |
| 0.004983055                                                  | 0.050078718                                   | 1                                                          |
| 0.007196428                                                  | 0.052645785                                   | 1                                                          |
| 0.006993711                                                  | 0.052499435                                   | 1                                                          |
| 0.003107672                                                  | 0.04901041                                    | 1                                                          |
| 0.007423338                                                  | 0.052338973                                   | 0.987730529                                                |
| 0.006040107                                                  | 0.054400807                                   | 0.98726167                                                 |
| 0.004553779                                                  | 0.050655461                                   | 1                                                          |
| 0.005593103                                                  | 0.053938039                                   | 0.992307807                                                |
| 0.002727854                                                  | 0.024397156                                   | 1                                                          |
| 0.010115021                                                  | 0.094169822                                   | 1                                                          |
| 0.010113884                                                  | 0.058990437                                   | 1                                                          |
| 0.006428375                                                  | 0.088203437                                   | 1                                                          |
| 0.004256268                                                  | 0.049876414                                   | 1                                                          |

| log.sigma.0.5.mm.3D_gldzm_LowIntensityEmphasis | log.sigma.0.5.mm.3D_gldzm_LargeDistanceEmphasis | log.sigma.0.5.mm.3D_gldzm_HighIntensitySmallDistanceEmphasis |
|------------------------------------------------|-------------------------------------------------|--------------------------------------------------------------|
| 0.042193326                                    | 1.017241379                                     | 41.64367816                                                  |
| 0.253708333                                    | 1                                               | 11.425                                                       |
| 0.20739418                                     | 1                                               | 13.19047619                                                  |
| 0.12430035                                     | 1                                               | 18.98181818                                                  |
| 0.102560631                                    | 1                                               | 18.125                                                       |
| 0.136801724                                    | 1                                               | 23.42592593                                                  |
| 0.084668247                                    | 1.011538462                                     | 21.82788462                                                  |
| 0.125160701                                    | 1                                               | 19.57664234                                                  |
| 0.102873538                                    | 1                                               | 20.67465753                                                  |
| 0.117895025                                    | 1                                               | 20.08235294                                                  |
| 0.217144608                                    | 1                                               | 13.97058824                                                  |
| 0.071042811                                    | 1                                               | 28.30681818                                                  |
| 0.150813492                                    | 1                                               | 19.86363636                                                  |
| 0.068539981                                    | 1                                               | 30.54736842                                                  |
| 0.064251973                                    | 1                                               | 29.76923077                                                  |
| 0.125634663                                    | 1                                               | 19.09625668                                                  |
| 0.154598765                                    | 1                                               | 16.87301587                                                  |
| 0.149703737                                    | 1                                               | 15.17391304                                                  |
| 0.093032372                                    | 1                                               | 21.40298507                                                  |
| 0.143412602                                    | 1.00887574                                      | 20.77588757                                                  |
| 0.160189594                                    | 1                                               | 14.12698413                                                  |
| 0.231827257                                    | 1                                               | 13.03125                                                     |
| 0.09693695                                     | 1                                               | 21.40677966                                                  |
| 0.102374783                                    | 1                                               | 21.47794118                                                  |
| 0.117172097                                    | 1                                               | 21.73684211                                                  |
| 0.053514028                                    | 1                                               | 33.95876289                                                  |
| 0.124032348                                    | 1                                               | 21.40106952                                                  |
| 0.118311144                                    | 1                                               | 20.55714286                                                  |
| 0.189017857                                    | 1                                               | 14.71428571                                                  |
| 0.132133273                                    | 1                                               | 17.87628866                                                  |
| 0.0692265                                      | 1                                               | 27.32340426                                                  |
| 0.114100456                                    | 1                                               | 17.75641026                                                  |
| 0.101628544                                    | 1                                               | 24.14736842                                                  |
| 0.134371407                                    | 1                                               | 20.66901408                                                  |
| 0.100346285                                    | 1                                               | 21.9760274                                                   |
| 0.114671295                                    | 1                                               | 19.79674797                                                  |
| 0.04936638                                     | 1                                               | 37.11931818                                                  |
| 0.076419111                                    | 1                                               | 29.92814371                                                  |
| 0.127726591                                    | 1                                               | 18.11764706                                                  |
| 0.201295139                                    | 1.0075                                          | 14.778125                                                    |
| 0.230872585                                    | 1                                               | 13.51086957                                                  |
| 0.188950642                                    | 1                                               | 16.02491103                                                  |
| 0.107183852                                    | 1                                               | 20.29473684                                                  |
| 0.136022968                                    | 1                                               | 20.14516129                                                  |
| 0.071228823                                    | 1                                               | 30.07865169                                                  |
| 0.214608175                                    | 1                                               | 15.60377358                                                  |
| 0.095247756                                    | 1                                               | 23.09363296                                                  |
| 0.244323899                                    | 1                                               | 13.8490566                                                   |
| 0.251700275                                    | 1                                               | 14.35714286                                                  |
| 0.098164862                                    | 1                                               | 19.73239437                                                  |
| 0.128019396                                    | 1                                               | 21.68786127                                                  |
| 0.090068668                                    | 1                                               | 23.5095057                                                   |
| 0.092848486                                    | 1                                               | 21.13357401                                                  |
| 0.242309671                                    | 1                                               | 13.35185185                                                  |
| 0.113750693                                    | 1                                               | 21.04444444                                                  |
| 0.249819902                                    | 1                                               | 13.25274725                                                  |
| 0.096683147                                    | 1                                               | 20.5                                                         |
| 0.124827324                                    | 1                                               | 20.1                                                         |
| 0.113356493                                    | 1                                               | 20.50833333                                                  |
| 0.112755461                                    | 1                                               | 23.02729045                                                  |
| 0.110751295                                    | 1                                               | 21.55670103                                                  |
| 0.08354653                                     | 1                                               | 29.03636364                                                  |
| 0.057436584                                    | 1.017045455                                     | 30.23082386                                                  |
| 0.132062248                                    | 1.01863354                                      | 20.68995859                                                  |
| 0.171227599                                    | 1                                               | 12.5483871                                                   |
| 0.139446212                                    | 1.033707865                                     | 18.8511236                                                   |
| 0.148524445                                    | 1                                               | 18.33333333                                                  |
| 0.05774294                                     | 1.016713092                                     | 28.11977716                                                  |
| 0.049951453                                    | 1                                               | 31.57234043                                                  |
| 0.109662085                                    | 1                                               | 17.92783505                                                  |
| 0.265281924                                    | 1                                               | 11.71641791                                                  |
| 0.145077449                                    | 1.014084507                                     | 18.96830986                                                  |
| 0.100805                                       | 1                                               | 21.35483871                                                  |
| 0.106563422                                    | 1                                               | 21.67320261                                                  |
| 0.207332631                                    | 1.014285714                                     | 14.73809524                                                  |
| 0.252504085                                    | 1                                               | 13.20588235                                                  |
| 0.07911785                                     | 1                                               | 24.171875                                                    |
| 0.154991497                                    | 1                                               | 18.76923077                                                  |
| 0.095484356                                    | 1                                               | 20.05952381                                                  |
| 0.097128121                                    | 1                                               | 23.74853801                                                  |
| 0.041592148                                    | 1                                               | 41.54748603                                                  |
| 0.122824752                                    | 1                                               | 20.29059829                                                  |
| 0.137183718                                    | 1                                               | 20.58125                                                     |
| 0.181965352                                    | 1                                               | 13.08602151                                                  |
| 0.100205722                                    | 1                                               | 20.88050314                                                  |
| 0.321578283                                    | 1                                               | 5.545454545                                                  |
| 0.118457244                                    | 1                                               | 20.5971223                                                   |
| 0.089401115                                    | 1                                               | 22.11888112                                                  |
| 0.109664757                                    | 1                                               | 21.16842105                                                  |
| 0.123875714                                    | 1                                               | 20.01851852                                                  |
| 0.111696783                                    | 1                                               | 16.03125                                                     |
| 0.101181693                                    | 1.018518519                                     | 21.49382716                                                  |
| 0.098955926                                    | 1.019230769                                     | 22.16746795                                                  |
| 0.086160751                                    | 1                                               | 22.26282051                                                  |
| 0.089715661                                    | 1.011583012                                     | 22.40540541                                                  |
| 0.044155681                                    | 1                                               | 39.86956522                                                  |
| 0.216946565                                    | 1                                               | 14.30534351                                                  |
| 0.184771777                                    | 1                                               | 16.68965517                                                  |
| 0.188900463                                    | 1                                               | 12.45833333                                                  |
| 0.105580864                                    | 1                                               | 17.68246445                                                  |

| log.sigma.0.5.mm.3D_gldzm_LowIntensityLargeDistanceEmphasis | log.sigma.0.5.mm.3D_gldzm_HighIntensityEmphasis | log.sigma.0.5.mm.3D_gldzm_DistanceZoneVariability | log.sigma.0.5.mm.3D_gldzm_ZonePercentage |
|-------------------------------------------------------------|-------------------------------------------------|---------------------------------------------------|------------------------------------------|
| 0.043270913                                                 | 41.71264368                                     | 172.0114943                                       | 0.081998115                              |
| 0.253708333                                                 | 11.425                                          | 40                                                | 0.042780749                              |
| 0.20739418                                                  | 13.19047619                                     | 63                                                | 0.0410691                                |
| 0.12430035                                                  | 18.98181818                                     | 55                                                | 0.05629478                               |
| 0.102560631                                                 | 18.125                                          | 128                                               | 0.054054054                              |
| 0.136801724                                                 | 23.42592593                                     | 54                                                | 0.081818182                              |
| 0.085950299                                                 | 21.85384615                                     | 258.0076923                                       | 0.046009556                              |
| 0.125160701                                                 | 19.57664234                                     | 274                                               | 0.053641347                              |
| 0.102873538                                                 | 20.67465753                                     | 292                                               | 0.064232292                              |
| 0.117895025                                                 | 20.08235294                                     | 85                                                | 0.079291045                              |
| 0.217144608                                                 | 13.97058824                                     | 68                                                | 0.045092838                              |
| 0.071042811                                                 | 28.30681818                                     | 176                                               | 0.076355748                              |
| 0.150813492                                                 | 19.86363636                                     | 66                                                | 0.03535083                               |
| 0.068539981                                                 | 30.54736842                                     | 95                                                | 0.055329062                              |
| 0.064251973                                                 | 29.76923077                                     | 156                                               | 0.078629032                              |
| 0.125634663                                                 | 19.09625668                                     | 187                                               | 0.04273309                               |
| 0.154598765                                                 | 16.87301587                                     | 63                                                | 0.052763819                              |
| 0.149703737                                                 | 15.17391304                                     | 46                                                | 0.03730738                               |
| 0.093032372                                                 | 21.40298507                                     | 67                                                | 0.051617874                              |
| 0.152288342                                                 | 20.77810651                                     | 336.0059172                                       | 0.065012502                              |
| 0.160189594                                                 | 14.12698413                                     | 63                                                | 0.020833333                              |
| 0.231827257                                                 | 13.03125                                        | 64                                                | 0.05931418                               |
| 0.09693695                                                  | 21.40677966                                     | 59                                                | 0.057617188                              |
| 0.102374783                                                 | 21.47794118                                     | 136                                               | 0.05137892                               |
| 0.117172097                                                 | 21.73684211                                     | 76                                                | 0.059701493                              |
| 0.053514028                                                 | 33.95876289                                     | 194                                               | 0.081891093                              |
| 0.124032348                                                 | 21.40106952                                     | 187                                               | 0.057841015                              |
| 0.118311144                                                 | 20.55714286                                     | 140                                               | 0.050687907                              |
| 0.189017857                                                 | 14.71428571                                     | 28                                                | 0.062639821                              |
| 0.132133273                                                 | 17.87628866                                     | 97                                                | 0.047224927                              |
| 0.0692265                                                   | 27.32340426                                     | 235                                               | 0.0493905                                |
| 0.114100456                                                 | 17.75641026                                     | 78                                                | 0.037699372                              |
| 0.101628544                                                 | 24.14736842                                     | 190                                               | 0.058841747                              |
| 0.134371407                                                 | 20.66901408                                     | 142                                               | 0.060425532                              |
| 0.100346285                                                 | 21.9760274                                      | 292                                               | 0.066303361                              |
| 0.114671295                                                 | 19.79674797                                     | 123                                               | 0.041013671                              |
| 0.04936638                                                  | 37.11931818                                     | 176                                               | 0.047299113                              |
| 0.076419111                                                 | 29.92814371                                     | 167                                               | 0.03235807                               |
| 0.127726591                                                 | 18.11764706                                     | 68                                                | 0.055284553                              |
| 0.208795139                                                 | 14.78                                           | 398.005                                           | 0.055020633                              |
| 0.230872585                                                 | 13.51086957                                     | 92                                                | 0.035466461                              |
| 0.188950642                                                 | 16.02491103                                     | 281                                               | 0.072666149                              |
| 0.107183852                                                 | 20.29473684                                     | 190                                               | 0.052012045                              |
| 0.136022968                                                 | 20.14516129                                     | 186                                               | 0.074758842                              |
| 0.071228823                                                 | 30.07865169                                     | 89                                                | 0.069640063                              |
| 0.214608175                                                 | 15.60377358                                     | 159                                               | 0.057923497                              |
| 0.095247756                                                 | 23.09363296                                     | 267                                               | 0.058526962                              |
| 0.244323899                                                 | 13.8490566                                      | 53                                                | 0.060849598                              |
| 0.251700275                                                 | 14.35714286                                     | 70                                                | 0.082256169                              |
| 0.098164862                                                 | 19.73239437                                     | 71                                                | 0.052514793                              |
| 0.128019396                                                 | 21.68786127                                     | 173                                               | 0.067341378                              |
| 0.090068668                                                 | 23.5095057                                      | 263                                               | 0.078018392                              |
| 0.092848486                                                 | 21.13357401                                     | 277                                               | 0.061391844                              |
| 0.242309671                                                 | 13.35185185                                     | 54                                                | 0.048913043                              |
| 0.113750693                                                 | 21.04444444                                     | 90                                                | 0.067669173                              |
| 0.249819902                                                 | 13.25274725                                     | 91                                                | 0.046666667                              |
| 0.096683147                                                 | 20.5                                            | 234                                               | 0.057849197                              |
| 0.124827324                                                 | 20.1                                            | 150                                               | 0.043377675                              |
| 0.113356493                                                 | 20.50833333                                     | 120                                               | 0.072815534                              |
| 0.112755461                                                 | 23.02729045                                     | 513                                               | 0.056194545                              |
| 0.110751295                                                 | 21.55670103                                     | 97                                                | 0.054926387                              |
| 0.08354653                                                  | 29.03636364                                     | 165                                               | 0.061797753                              |
| 0.058916224                                                 | 30.28409091                                     | 348.0227273                                       | 0.060804975                              |
| 0.134477707                                                 | 20.76604555                                     | 477.0372671                                       | 0.063360882                              |
| 0.171227599                                                 | 12.5483871                                      | 31                                                | 0.039240506                              |
| 0.156644102                                                 | 19.06179775                                     | 174.0449438                                       | 0.046090109                              |
| 0.148524445                                                 | 18.33333333                                     | 66                                                | 0.050613497                              |
| 0.058787508                                                 | 28.18662953                                     | 355.0222841                                       | 0.05744                                  |
| 0.049951453                                                 | 31.57234043                                     | 470                                               | 0.08024586                               |
| 0.10962085                                                  | 17.92783505                                     | 97                                                | 0.03347136                               |
| 0.265281924                                                 | 11.71641791                                     | 67                                                | 0.051578137                              |
| 0.146642394                                                 | 19                                              | 211.0093897                                       | 0.04965035                               |
| 0.100805                                                    | 21.35483871                                     | 124                                               | 0.054409829                              |
| 0.106563422                                                 | 21.67320261                                     | 153                                               | 0.067729084                              |
| 0.21090406                                                  | 14.75238095                                     | 208.0095238                                       | 0.067071223                              |
| 0.252504085                                                 | 13.20588235                                     | 68                                                | 0.050670641                              |
| 0.07911785                                                  | 24.171875                                       | 128                                               | 0.053422371                              |
| 0.154991497                                                 | 18.76923077                                     | 52                                                | 0.054279749                              |
| 0.095484356                                                 | 20.05952381                                     | 84                                                | 0.049209139                              |
| 0.097128121                                                 | 23.74853801                                     | 171                                               | 0.073108166                              |
| 0.041592148                                                 | 41.54748603                                     | 179                                               | 0.089994972                              |
| 0.122824752                                                 | 20.29059829                                     | 117                                               | 0.065036131                              |
| 0.137183718                                                 | 20.58125                                        | 160                                               | 0.048944631                              |
| 0.181965352                                                 | 13.08602151                                     | 93                                                | 0.030263586                              |
| 0.100205722                                                 | 20.88050314                                     | 159                                               | 0.065190652                              |
| 0.321578283                                                 | 5.545454545                                     | 22                                                | 0.014360313                              |
| 0.118457244                                                 | 20.5971223                                      | 139                                               | 0.058280922                              |
| 0.089401115                                                 | 22.11888112                                     | 143                                               | 0.052151714                              |
| 0.109664757                                                 | 21.16842105                                     | 95                                                | 0.06489071                               |
| 0.123875714                                                 | 20.01851852                                     | 108                                               | 0.053333333                              |
| 0.111696783                                                 | 16.03125                                        | 32                                                | 0.024539877                              |
| 0.101696096                                                 | 21.66049383                                     | 160.0123457                                       | 0.068010076                              |
| 0.099419252                                                 | 22.37179487                                     | 308.025641                                        | 0.060196797                              |
| 0.086160751                                                 | 22.26282051                                     | 156                                               | 0.047272727                              |
| 0.090037412                                                 | 22.50965251                                     | 257.007722                                        | 0.059512868                              |
| 0.044155681                                                 | 39.86956522                                     | 207                                               | 0.060490941                              |
| 0.216946565                                                 | 14.30534351                                     | 131                                               | 0.046503372                              |
| 0.184771777                                                 | 16.68965517                                     | 58                                                | 0.055396371                              |
| 0.188900463                                                 | 12.45833333                                     | 24                                                | 0.028776978                              |
| 0.105580864                                                 | 17.68246445                                     | 211                                               | 0.036543124                              |



| log.sigma.0.5.mm.3D_gldzm_IntensityVariabilityNormalized | log.sigma.0.5.mm.3D_gldzm_LowIntensitySmallDistanceEmphasis | log.sigma.0.5.mm.3D_gldzm_IntensityVariability |
|----------------------------------------------------------|-------------------------------------------------------------|------------------------------------------------|
| 0.220306513                                              | 0.04192393                                                  | 38.3333333                                     |
| 0.27                                                     | 0.253708333                                                 | 10.8                                           |
| 0.310657596                                              | 0.20739418                                                  | 19.57142857                                    |
| 0.257520661                                              | 0.12430035                                                  | 14.16363636                                    |
| 0.303955078                                              | 0.102560631                                                 | 38.90625                                       |
| 0.211248285                                              | 0.136801724                                                 | 11.40740741                                    |
| 0.320473373                                              | 0.084347735                                                 | 83.32307692                                    |
| 0.248548138                                              | 0.125160701                                                 | 68.10218978                                    |
| 0.295505723                                              | 0.102873538                                                 | 86.28767123                                    |
| 0.250103806                                              | 0.117895025                                                 | 21.25882353                                    |
| 0.306228374                                              | 0.217144608                                                 | 20.82352941                                    |
| 0.20745093                                               | 0.071042811                                                 | 36.51136364                                    |
| 0.203397612                                              | 0.150813492                                                 | 13.42424242                                    |
| 0.242548476                                              | 0.068539981                                                 | 23.04210526                                    |
| 0.245397765                                              | 0.064251973                                                 | 38.28205128                                    |
| 0.235265521                                              | 0.125634663                                                 | 43.99465241                                    |
| 0.294532628                                              | 0.154598765                                                 | 18.55555556                                    |
| 0.280718336                                              | 0.149703737                                                 | 12.91304348                                    |
| 0.345956783                                              | 0.093032372                                                 | 23.17910448                                    |
| 0.243828998                                              | 0.141193667                                                 | 82.41420118                                    |
| 0.310657596                                              | 0.160189594                                                 | 19.57142857                                    |
| 0.346679688                                              | 0.231827257                                                 | 22.1875                                        |
| 0.295604711                                              | 0.09693695                                                  | 17.44067797                                    |
| 0.257893599                                              | 0.102374783                                                 | 35.07352941                                    |
| 0.246191136                                              | 0.117172097                                                 | 18.71052632                                    |
| 0.189658837                                              | 0.053514028                                                 | 36.79381443                                    |
| 0.227086848                                              | 0.124032348                                                 | 42.46524064                                    |
| 0.262857143                                              | 0.118311144                                                 | 36.8                                           |
| 0.323979592                                              | 0.189017857                                                 | 9.071428571                                    |
| 0.311085131                                              | 0.132133273                                                 | 30.17525773                                    |
| 0.239909461                                              | 0.0692265                                                   | 56.3787234                                     |
| 0.319526627                                              | 0.114100456                                                 | 24.92307692                                    |
| 0.243933518                                              | 0.101628544                                                 | 46.34736842                                    |
| 0.212854592                                              | 0.134371407                                                 | 30.22535211                                    |
| 0.253049353                                              | 0.100346285                                                 | 73.89041096                                    |
| 0.255998414                                              | 0.114671295                                                 | 31.48780488                                    |
| 0.197766012                                              | 0.04936638                                                  | 34.80681818                                    |
| 0.213596759                                              | 0.076419111                                                 | 35.67065868                                    |
| 0.312283737                                              | 0.127726591                                                 | 21.23529412                                    |
| 0.3266375                                                | 0.199420139                                                 | 130.655                                        |
| 0.315926276                                              | 0.230872585                                                 | 29.06521739                                    |
| 0.264041742                                              | 0.188950642                                                 | 74.19572954                                    |
| 0.261218837                                              | 0.107183852                                                 | 49.63157895                                    |
| 0.232281189                                              | 0.136022968                                                 | 43.20430108                                    |
| 0.242772377                                              | 0.071228823                                                 | 21.60674157                                    |
| 0.228353309                                              | 0.214608175                                                 | 36.3081761                                     |
| 0.236319769                                              | 0.095247756                                                 | 63.09737828                                    |
| 0.263082948                                              | 0.244323899                                                 | 13.94339623                                    |
| 0.229387755                                              | 0.251700275                                                 | 16.05714286                                    |
| 0.302122595                                              | 0.098164862                                                 | 21.45070423                                    |
| 0.242607504                                              | 0.128019396                                                 | 41.97109827                                    |
| 0.271176394                                              | 0.090068668                                                 | 71.31939163                                    |
| 0.320830455                                              | 0.092848486                                                 | 88.8700361                                     |
| 0.27914952                                               | 0.242309671                                                 | 15.07407407                                    |
| 0.249382716                                              | 0.113750693                                                 | 22.44444444                                    |
| 0.35032001                                               | 0.249819902                                                 | 31.87912088                                    |
| 0.298013003                                              | 0.096683147                                                 | 69.73504274                                    |
| 0.286933333                                              | 0.124827324                                                 | 43.04                                          |
| 0.266388889                                              | 0.113356493                                                 | 31.96666667                                    |
| 0.240586847                                              | 0.112755461                                                 | 123.4210526                                    |
| 0.229036029                                              | 0.110751295                                                 | 22.21649485                                    |
| 0.231955923                                              | 0.08354653                                                  | 38.27272727                                    |
| 0.232889979                                              | 0.057066674                                                 | 81.97727273                                    |
| 0.26630917                                               | 0.131458383                                                 | 128.6273292                                    |
| 0.329864724                                              | 0.171227599                                                 | 10.22580645                                    |
| 0.249779068                                              | 0.135146739                                                 | 44.46067416                                    |
| 0.272268136                                              | 0.148524445                                                 | 17.96969697                                    |
| 0.269155267                                              | 0.057481797                                                 | 96.62674095                                    |
| 0.207487551                                              | 0.049951453                                                 | 97.51914894                                    |
| 0.322350941                                              | 0.109662085                                                 | 31.26804124                                    |
| 0.294274894                                              | 0.265281924                                                 | 19.71641791                                    |
| 0.240141947                                              | 0.144686213                                                 | 51.15023474                                    |
| 0.249219563                                              | 0.100805                                                    | 30.90322581                                    |
| 0.230039728                                              | 0.106563422                                                 | 35.19607843                                    |
| 0.294013605                                              | 0.206439774                                                 | 61.74285714                                    |
| 0.334775087                                              | 0.252504085                                                 | 22.76470588                                    |
| 0.274902344                                              | 0.07911785                                                  | 35.1875                                        |
| 0.24704142                                               | 0.154991497                                                 | 12.84615385                                    |
| 0.286848073                                              | 0.095484356                                                 | 24.0952381                                     |
| 0.278342054                                              | 0.097128121                                                 | 47.59649123                                    |
| 0.212758653                                              | 0.041592148                                                 | 38.08379888                                    |
| 0.221710863                                              | 0.122824752                                                 | 25.94017094                                    |
| 0.22421875                                               | 0.137183718                                                 | 35.875                                         |
| 0.378887733                                              | 0.181965352                                                 | 35.23655914                                    |
| 0.254538982                                              | 0.100205722                                                 | 40.47169811                                    |
| 0.495867769                                              | 0.321578283                                                 | 10.90909091                                    |
| 0.244656074                                              | 0.118457244                                                 | 34.00719424                                    |
| 0.258154433                                              | 0.089401115                                                 | 36.91608392                                    |
| 0.250304709                                              | 0.109664757                                                 | 23.77894737                                    |
| 0.274348422                                              | 0.123875714                                                 | 29.62962963                                    |
| 0.37890625                                               | 0.111696783                                                 | 12.125                                         |
| 0.28494132                                               | 0.101053092                                                 | 46.16049383                                    |
| 0.27681213                                               | 0.098840094                                                 | 86.36538462                                    |
| 0.299556213                                              | 0.086160751                                                 | 46.73076923                                    |
| 0.332091054                                              | 0.089635224                                                 | 86.01158301                                    |
| 0.202408458                                              | 0.044155681                                                 | 41.89855072                                    |
| 0.288736088                                              | 0.216946565                                                 | 37.82442748                                    |
| 0.253269917                                              | 0.184771777                                                 | 14.68965517                                    |
| 0.395833333                                              | 0.188900463                                                 | 9.5                                            |
| 0.29157027                                               | 0.105580864                                                 | 61.52132701                                    |

| log.sigma.0.5.mm.3D_gldzm_HighIntensityLargeDistanceEmphasis | log.sigma.0.5.mm.3D_gldzm_SmallDistanceEmphasis | log.sigma.0.5.mm.3D_gldzm_SumVariance | log.sigma.0.5.mm.3D_gldzm_Homogeneity1 |
|--------------------------------------------------------------|-------------------------------------------------|---------------------------------------|----------------------------------------|
| 41.98850575                                                  | 0.995689655                                     | 116.1530476                           | 0.636183187                            |
| 11.425                                                       | 1                                               | 30.45638386                           | 0.725637783                            |
| 13.19047619                                                  | 1                                               | 30.26808771                           | 0.731743804                            |
| 18.98181818                                                  | 1                                               | 48.91528965                           | 0.691486366                            |
| 18.125                                                       | 1                                               | 51.85237694                           | 0.701897802                            |
| 23.42592593                                                  | 1                                               | 47.95310269                           | 0.652146826                            |
| 21.95769231                                                  | 0.997115385                                     | 53.19870536                           | 0.703129434                            |
| 19.57664234                                                  | 1                                               | 53.57800352                           | 0.710156287                            |
| 20.67465753                                                  | 1                                               | 52.01135393                           | 0.695133368                            |
| 20.08235294                                                  | 1                                               | 51.04513996                           | 0.680574715                            |
| 13.97058824                                                  | 1                                               | 29.19539917                           | 0.726445589                            |
| 28.30681818                                                  | 1                                               | 82.50373073                           | 0.670213501                            |
| 19.86363636                                                  | 1                                               | 53.843685                             | 0.718386495                            |
| 30.54736842                                                  | 1                                               | 82.63651241                           | 0.686664183                            |
| 29.76923077                                                  | 1                                               | 81.20694083                           | 0.666960875                            |
| 19.09625668                                                  | 1                                               | 53.14581428                           | 0.714049955                            |
| 16.87301587                                                  | 1                                               | 26.24161457                           | 0.682806735                            |
| 15.17391304                                                  | 1                                               | 55.72156188                           | 0.72970899                             |
| 21.40298507                                                  | 1                                               | 53.79838509                           | 0.709930434                            |
| 20.78698225                                                  | 0.997781065                                     | 50.77776724                           | 0.681963273                            |
| 14.12698413                                                  | 1                                               | 30.94536562                           | 0.739171753                            |
| 13.03125                                                     | 1                                               | 27.82752037                           | 0.685918405                            |
| 21.40677966                                                  | 1                                               | 52.65285027                           | 0.698188505                            |
| 21.47794118                                                  | 1                                               | 52.8873912                            | 0.700479835                            |
| 21.73684211                                                  | 1                                               | 52.97617546                           | 0.693385123                            |
| 33.95876289                                                  | 1                                               | 82.49681109                           | 0.675455776                            |
| 21.40106952                                                  | 1                                               | 50.56880379                           | 0.676280138                            |
| 20.55714286                                                  | 1                                               | 52.05370359                           | 0.70358598                             |
| 14.71428571                                                  | 1                                               | 27.54084159                           | 0.676833932                            |
| 17.87628866                                                  | 1                                               | 54.80514442                           | 0.722196503                            |
| 27.32340426                                                  | 1                                               | 86.6546588                            | 0.711006104                            |
| 17.75641026                                                  | 1                                               | 52.41153564                           | 0.712455146                            |
| 24.14736842                                                  | 1                                               | 49.7792364                            | 0.695943217                            |
| 20.66901408                                                  | 1                                               | 50.50134609                           | 0.687652716                            |
| 21.9760274                                                   | 1                                               | 51.9875112                            | 0.686561534                            |
| 19.79674797                                                  | 1                                               | 53.68653886                           | 0.71149028                             |
| 37.11931818                                                  | 1                                               | 123.1281738                           | 0.694584278                            |
| 29.92814371                                                  | 1                                               | 84.41059044                           | 0.714130302                            |
| 18.11764706                                                  | 1                                               | 52.34757068                           | 0.708624265                            |
| 14.7875                                                      | 0.998125                                        | 26.05817686                           | 0.689264873                            |
| 13.51086957                                                  | 1                                               | 28.05363416                           | 0.714421584                            |
| 16.02491103                                                  | 1                                               | 24.14494845                           | 0.648429806                            |
| 20.29473684                                                  | 1                                               | 52.65668558                           | 0.703114412                            |
| 20.14516129                                                  | 1                                               | 48.59636355                           | 0.661074874                            |
| 30.07865169                                                  | 1                                               | 86.1398362                            | 0.701800692                            |
| 15.60377358                                                  | 1                                               | 28.19584641                           | 0.694480512                            |
| 23.09363296                                                  | 1                                               | 51.66691795                           | 0.691996085                            |
| 13.8490566                                                   | 1                                               | 30.00934443                           | 0.725110409                            |
| 14.35714286                                                  | 1                                               | 25.98315982                           | 0.661206648                            |
| 19.73239437                                                  | 1                                               | 55.31490341                           | 0.716922641                            |
| 21.68786127                                                  | 1                                               | 51.04698821                           | 0.673932004                            |
| 23.5095057                                                   | 1                                               | 49.12774503                           | 0.660866284                            |
| 21.13357401                                                  | 1                                               | 50.97740862                           | 0.680372766                            |
| 13.35185185                                                  | 1                                               | 29.9310889                            | 0.722363342                            |
| 21.04444444                                                  | 1                                               | 52.65806047                           | 0.691397972                            |
| 13.25274725                                                  | 1                                               | 28.12618753                           | 0.709757964                            |
| 20.5                                                         | 1                                               | 51.83696879                           | 0.688727078                            |
| 20.1                                                         | 1                                               | 51.32532733                           | 0.703609344                            |
| 20.50833333                                                  | 1                                               | 51.59284108                           | 0.695089958                            |
| 23.02729045                                                  | 1                                               | 47.7554458                            | 0.661247792                            |
| 21.55670103                                                  | 1                                               | 54.18532371                           | 0.713195214                            |
| 29.03636364                                                  | 1                                               | 83.60922342                           | 0.678980853                            |
| 30.49715909                                                  | 0.995738636                                     | 84.51053671                           | 0.685059339                            |
| 21.07039337                                                  | 0.995341615                                     | 50.4830391                            | 0.693264242                            |
| 12.5483871                                                   | 1                                               | 31.05397322                           | 0.740404836                            |
| 19.90449438                                                  | 0.991573034                                     | 52.05564844                           | 0.70401872                             |
| 18.33333333                                                  | 1                                               | 51.82236415                           | 0.697177444                            |
| 28.454039                                                    | 0.995821727                                     | 81.99337708                           | 0.684630206                            |
| 31.57234043                                                  | 1                                               | 84.49679712                           | 0.694102003                            |
| 17.92783505                                                  | 1                                               | 55.36586907                           | 0.729423502                            |
| 11.71641791                                                  | 1                                               | 27.8097144                            | 0.703075191                            |
| 19.12676056                                                  | 0.996478873                                     | 53.82975709                           | 0.712139534                            |
| 21.35483871                                                  | 1                                               | 51.56878235                           | 0.698136447                            |
| 21.67320261                                                  | 1                                               | 47.25274347                           | 0.647572075                            |
| 14.80952381                                                  | 0.996428571                                     | 25.20882625                           | 0.660628626                            |
| 13.20588235                                                  | 1                                               | 27.61616256                           | 0.70268457                             |
| 24.171875                                                    | 1                                               | 55.12695585                           | 0.721968106                            |
| 18.76923077                                                  | 1                                               | 52.57206076                           | 0.703039622                            |
| 20.05952381                                                  | 1                                               | 53.35047559                           | 0.709574523                            |
| 23.74853801                                                  | 1                                               | 48.00399083                           | 0.672826747                            |
| 41.54748603                                                  | 1                                               | 116.9756691                           | 0.643103828                            |
| 20.29059829                                                  | 1                                               | 49.02843717                           | 0.683345194                            |
| 20.58125                                                     | 1                                               | 52.38332587                           | 0.705003441                            |
| 13.08602151                                                  | 1                                               | 30.18700564                           | 0.742107518                            |
| 20.88050314                                                  | 1                                               | 49.58303363                           | 0.678899205                            |
| 5.545454545                                                  | 1                                               | 33.91387724                           | 0.776104279                            |
| 20.5971223                                                   | 1                                               | 48.69807216                           | 0.677643091                            |
| 22.11888112                                                  | 1                                               | 54.14862161                           | 0.702474749                            |
| 21.16842105                                                  | 1                                               | 53.58060893                           | 0.713915352                            |
| 20.01851852                                                  | 1                                               | 54.72891768                           | 0.724579568                            |
| 16.03125                                                     | 1                                               | 57.02195375                           | 0.732382034                            |
| 22.32716049                                                  | 0.99537037                                      | 51.62336052                           | 0.673217642                            |
| 23.18910256                                                  | 0.995192308                                     | 49.31859322                           | 0.676024847                            |
| 22.26282051                                                  | 1                                               | 54.16443497                           | 0.715072993                            |
| 22.92664093                                                  | 0.997104247                                     | 49.34790813                           | 0.67949907                             |
| 39.86956522                                                  | 1                                               | 123.2786987                           | 0.686118523                            |
| 14.30534351                                                  | 1                                               | 26.99524496                           | 0.701062405                            |
| 16.68965517                                                  | 1                                               | 50.06003647                           | 0.683741914                            |
| 12.45833333                                                  | 1                                               | 29.70662316                           | 0.732582015                            |
| 17.68246445                                                  | 1                                               | 55.90615563                           | 0.723285025                            |

| log.sigma.0.5.mm.3D_glcml_Homogeneity2 | log.sigma.0.5.mm.3D_glcml_ClusterShade | log.sigma.0.5.mm.3D_glcml_MaximumProbability | log.sigma.0.5.mm.3D_glcml_Ldmn | log.sigma.0.5.mm.3D_glcml_SumVariance2 |
|----------------------------------------|----------------------------------------|----------------------------------------------|--------------------------------|----------------------------------------|
| 0.607201363                            | -1.323446886                           | 0.240661285                                  | 0.979306314                    | 1.86234212                             |
| 0.716058858                            | -0.353236223                           | 0.374333537                                  | 0.979404707                    | 0.848673612                            |
| 0.723649454                            | -0.249418879                           | 0.367132667                                  | 0.980958817                    | 0.819052919                            |
| 0.671835528                            | -1.311456952                           | 0.310440964                                  | 0.976600665                    | 1.402422787                            |
| 0.685230514                            | -0.915319751                           | 0.350608201                                  | 0.979972025                    | 1.156339604                            |
| 0.628077985                            | -0.264541766                           | 0.245252269                                  | 0.978123144                    | 1.73767989                             |
| 0.690423181                            | -0.257896296                           | 0.312116309                                  | 0.986222703                    | 1.0139094                              |
| 0.695190724                            | -0.619107995                           | 0.367898403                                  | 0.984795718                    | 1.123570315                            |
| 0.677468073                            | -0.752143095                           | 0.332839541                                  | 0.983418302                    | 1.182692211                            |
| 0.661393984                            | -0.830931544                           | 0.306978691                                  | 0.976746712                    | 1.312540567                            |
| 0.716692939                            | -0.465929596                           | 0.350835816                                  | 0.979480353                    | 0.840924142                            |
| 0.64746434                             | -1.519658725                           | 0.309889019                                  | 0.982413325                    | 1.595632594                            |
| 0.707471608                            | -0.605429484                           | 0.345842445                                  | 0.982362357                    | 1.007083156                            |
| 0.668147034                            | -1.220119421                           | 0.318092782                                  | 0.981429548                    | 1.434225138                            |
| 0.642911852                            | -1.31038443                            | 0.301933392                                  | 0.985071792                    | 1.616961384                            |
| 0.702089256                            | -0.654790792                           | 0.337438302                                  | 0.986066199                    | 1.029963562                            |
| 0.665408091                            | -0.150550524                           | 0.254512466                                  | 0.972377007                    | 1.169830298                            |
| 0.720681123                            | -0.504707979                           | 0.379267317                                  | 0.984509333                    | 0.888202344                            |
| 0.69863821                             | -0.224643018                           | 0.319485364                                  | 0.983326109                    | 0.898431267                            |
| 0.663745118                            | -0.690919259                           | 0.296855651                                  | 0.982164809                    | 1.350410675                            |
| 0.733285623                            | -0.188128245                           | 0.36452196                                   | 0.982749797                    | 0.70591604                             |
| 0.668961338                            | -0.509560263                           | 0.308070764                                  | 0.962536767                    | 1.066035858                            |
| 0.683753049                            | -0.471813321                           | 0.31187006                                   | 0.980775435                    | 1.048154043                            |
| 0.686739535                            | -0.276923464                           | 0.293979449                                  | 0.981131623                    | 1.071021943                            |
| 0.677697874                            | -0.628216919                           | 0.321862072                                  | 0.979086701                    | 1.197952363                            |
| 0.653514953                            | -0.377635694                           | 0.299397986                                  | 0.983736548                    | 1.626077343                            |
| 0.655791776                            | -0.624967606                           | 0.286736133                                  | 0.980627154                    | 1.438392055                            |
| 0.689184968                            | -0.840308262                           | 0.328355133                                  | 0.980142134                    | 1.138402124                            |
| 0.658292107                            | -0.310241766                           | 0.282790738                                  | 0.971920461                    | 1.114318381                            |
| 0.709730323                            | -0.76915853                            | 0.387228331                                  | 0.982622581                    | 0.955955802                            |
| 0.697115618                            | -0.881751862                           | 0.358744443                                  | 0.987701398                    | 1.141082126                            |
| 0.699182942                            | -0.775343442                           | 0.345065991                                  | 0.981641167                    | 0.992297794                            |
| 0.677685791                            | -0.276881316                           | 0.297555012                                  | 0.986062265                    | 1.384730914                            |
| 0.669339095                            | -1.251280863                           | 0.314882571                                  | 0.981376961                    | 1.437062574                            |
| 0.667367297                            | -0.659824021                           | 0.32349685                                   | 0.982172031                    | 1.340868122                            |
| 0.700171362                            | -0.421727972                           | 0.330240207                                  | 0.989060853                    | 1.003167873                            |
| 0.679484252                            | -1.010663086                           | 0.296639241                                  | 0.988123796                    | 1.25461533                             |
| 0.70234424                             | -0.55993493                            | 0.309616495                                  | 0.988539544                    | 1.0939984                              |
| 0.694184971                            | -0.750203488                           | 0.337179111                                  | 0.980352898                    | 1.008066598                            |
| 0.67269785                             | -0.226007836                           | 0.254759157                                  | 0.973157693                    | 1.14209147                             |
| 0.702517022                            | -0.480695366                           | 0.332696258                                  | 0.977504738                    | 0.943539738                            |
| 0.62284681                             | -0.037158674                           | 0.192536909                                  | 0.973364173                    | 1.521011585                            |
| 0.687890031                            | -0.709020028                           | 0.336971767                                  | 0.980491082                    | 1.107314762                            |
| 0.636868297                            | -1.399377904                           | 0.282037241                                  | 0.971493749                    | 1.579320358                            |
| 0.685421512                            | -0.994143636                           | 0.365292429                                  | 0.986198154                    | 1.267147721                            |
| 0.679331804                            | -0.174125503                           | 0.307488777                                  | 0.984257025                    | 1.155529689                            |
| 0.675001793                            | -0.377447503                           | 0.314046956                                  | 0.983325263                    | 1.246599741                            |
| 0.712464172                            | -0.564863367                           | 0.401990216                                  | 0.977302013                    | 0.893386081                            |
| 0.636313559                            | -0.961982688                           | 0.301285854                                  | 0.972385392                    | 1.637451472                            |
| 0.70482551                             | -0.460300715                           | 0.363135861                                  | 0.983137081                    | 0.964797903                            |
| 0.653632305                            | -0.77515785                            | 0.298165519                                  | 0.980814051                    | 1.471636968                            |
| 0.637496678                            | -0.356580395                           | 0.251506432                                  | 0.980178936                    | 1.451887236                            |
| 0.662448285                            | -0.474453864                           | 0.29020221                                   | 0.97868835                     | 1.178295861                            |
| 0.711427122                            | -0.158194974                           | 0.358439993                                  | 0.978248498                    | 0.920964405                            |
| 0.674206107                            | -0.366195978                           | 0.32739922                                   | 0.978385811                    | 1.30650241                             |
| 0.69762842                             | -0.623352008                           | 0.333356043                                  | 0.97668011                     | 0.986369926                            |
| 0.670418986                            | -0.589483522                           | 0.313638851                                  | 0.983146591                    | 1.212661894                            |
| 0.690249572                            | -0.690548755                           | 0.306526791                                  | 0.98094147                     | 1.07094414                             |
| 0.678236922                            | -0.79322713                            | 0.323416713                                  | 0.983418939                    | 1.170181914                            |
| 0.639108356                            | -0.437748398                           | 0.212847752                                  | 0.979919524                    | 1.443053324                            |
| 0.699641517                            | -0.473519376                           | 0.36291514                                   | 0.98510532                     | 1.084987133                            |
| 0.658631674                            | -1.160626862                           | 0.30887321                                   | 0.986700708                    | 1.422886297                            |
| 0.666359197                            | -0.628881749                           | 0.311876385                                  | 0.985683135                    | 1.361403307                            |
| 0.675885295                            | -0.684171305                           | 0.312662149                                  | 0.982803856                    | 1.271892625                            |
| 0.734686116                            | -0.321791962                           | 0.379682673                                  | 0.976022786                    | 0.683100676                            |
| 0.68981829                             | -0.797093734                           | 0.3284286                                    | 0.984307321                    | 1.111033823                            |
| 0.682182595                            | -0.931522613                           | 0.319655209                                  | 0.97906903                     | 1.087244622                            |
| 0.665735989                            | -0.772099496                           | 0.300851329                                  | 0.985592712                    | 1.315175103                            |
| 0.676697696                            | -0.814793019                           | 0.328928901                                  | 0.98882302                     | 1.260872925                            |
| 0.721594733                            | -0.409344686                           | 0.350667631                                  | 0.980555641                    | 0.785274495                            |
| 0.688427218                            | -0.618318295                           | 0.330747645                                  | 0.974657396                    | 1.060375988                            |
| 0.698209435                            | -0.697168229                           | 0.360766848                                  | 0.984723753                    | 1.155481505                            |
| 0.681905199                            | -0.533367392                           | 0.32174455                                   | 0.983731502                    | 1.224545825                            |
| 0.620862113                            | -0.94421346                            | 0.244627104                                  | 0.977082523                    | 1.671118135                            |
| 0.638932614                            | -0.35033272                            | 0.236292667                                  | 0.975685541                    | 1.346376056                            |
| 0.687683092                            | -0.759244041                           | 0.334990795                                  | 0.974452992                    | 1.055005993                            |
| 0.71154881                             | -0.015933692                           | 0.351080048                                  | 0.987676425                    | 0.902259261                            |
| 0.688838096                            | -0.904104989                           | 0.335642513                                  | 0.980002901                    | 1.067069442                            |
| 0.697280674                            | -0.452740639                           | 0.32370658                                   | 0.982543539                    | 0.951568651                            |
| 0.650145117                            | -0.717957075                           | 0.266312769                                  | 0.979478908                    | 1.493425263                            |
| 0.61586506                             | -1.269238047                           | 0.248802343                                  | 0.980146288                    | 1.799855412                            |
| 0.662675128                            | -0.920926529                           | 0.304532109                                  | 0.980779364                    | 1.34459645                             |
| 0.690773198                            | -0.6123077                             | 0.320489726                                  | 0.984410621                    | 1.105439157                            |
| 0.735809196                            | -0.265228689                           | 0.355836589                                  | 0.975516469                    | 0.721758038                            |
| 0.657955319                            | -0.871815111                           | 0.298496047                                  | 0.975571453                    | 1.368358728                            |
| 0.773083166                            | -0.366274929                           | 0.450931252                                  | 0.980516429                    | 0.564751059                            |
| 0.657441224                            | -0.856556006                           | 0.280921889                                  | 0.981179729                    | 1.340705513                            |
| 0.687919807                            | -0.516315858                           | 0.342361596                                  | 0.980773383                    | 1.132629202                            |
| 0.700533061                            | -0.867946473                           | 0.363001545                                  | 0.980982966                    | 1.068615005                            |
| 0.711984418                            | -0.874312533                           | 0.394416942                                  | 0.98225824                     | 0.988873571                            |
| 0.726762428                            | -0.085550995                           | 0.35595533                                   | 0.987011467                    | 0.744462046                            |
| 0.653669925                            | -0.415725678                           | 0.267841066                                  | 0.977384023                    | 1.282081908                            |
| 0.656261405                            | -0.611231538                           | 0.282718094                                  | 0.98174439                     | 1.315992403                            |
| 0.70304273                             | -0.594907136                           | 0.356860047                                  | 0.98274034                     | 1.010738181                            |
| 0.660176788                            | -0.388351719                           | 0.264652904                                  | 0.982427203                    | 1.243645743                            |
| 0.667402591                            | -1.382452733                           | 0.321564318                                  | 0.987199636                    | 1.493428202                            |
| 0.686456571                            | -0.404319405                           | 0.301332698                                  | 0.975011702                    | 1.058090464                            |
| 0.664348776                            | -1.04850622                            | 0.306937061                                  | 0.975231976                    | 1.36002373                             |
| 0.72407161                             | -0.424493157                           | 0.365756282                                  | 0.973354861                    | 0.760541377                            |
| 0.714287145                            | -0.20596688                            | 0.353617486                                  | 0.984613363                    | 0.856737795                            |

| log.sigma.0.5.mm.3D_glc_m_Contrast | log.sigma.0.5.mm.3D_glc_m_DifferenceEntropy | log.sigma.0.5.mm.3D_glc_m_InverseVariance | log.sigma.0.5.mm.3D_glc_m_Entropy | log.sigma.0.5.mm.3D_glc_m_Dissimilarity |
|------------------------------------|---------------------------------------------|-------------------------------------------|-----------------------------------|-----------------------------------------|
| 1.827658741                        | 1.798459537                                 | 0.474387183                               | 3.825799898                       | 0.951264434                             |
| 0.802063614                        | 1.343279414                                 | 0.468612691                               | 2.666778317                       | 0.606653006                             |
| 0.733129592                        | 1.295402032                                 | 0.469461937                               | 2.643086868                       | 0.582626884                             |
| 1.271783524                        | 1.60428046                                  | 0.44806399                                | 3.285034014                       | 0.756136942                             |
| 1.061755491                        | 1.511559399                                 | 0.455942647                               | 3.034069426                       | 0.70078588                              |
| 1.529516183                        | 1.682168363                                 | 0.487697134                               | 3.553626262                       | 0.870808926                             |
| 0.928050549                        | 1.419808519                                 | 0.487573794                               | 2.975303024                       | 0.670146286                             |
| 1.042565417                        | 1.49525362                                  | 0.45227545                                | 2.986392488                       | 0.6801057                               |
| 1.137220332                        | 1.5463624                                   | 0.459969746                               | 3.145222779                       | 0.725538404                             |
| 1.254468994                        | 1.584551374                                 | 0.474689892                               | 3.267113329                       | 0.77134038                              |
| 0.797129049                        | 1.345499369                                 | 0.465814482                               | 2.680756805                       | 0.604912862                             |
| 1.548114576                        | 1.699659371                                 | 0.459824654                               | 3.440619454                       | 0.839075917                             |
| 0.94440639                         | 1.409567285                                 | 0.468838505                               | 2.802246852                       | 0.64290641                              |
| 1.302640832                        | 1.600113259                                 | 0.465799778                               | 3.300169662                       | 0.765358904                             |
| 1.596834189                        | 1.721514669                                 | 0.454959292                               | 3.51340206                        | 0.855580177                             |
| 0.951273587                        | 1.428840369                                 | 0.469746629                               | 2.899453209                       | 0.653570751                             |
| 1.095117851                        | 1.510076155                                 | 0.488862151                               | 3.227183575                       | 0.739660695                             |
| 0.812811023                        | 1.343918485                                 | 0.463911776                               | 2.653465573                       | 0.600267173                             |
| 0.868153964                        | 1.378878695                                 | 0.486126564                               | 2.8325151                         | 0.646542903                             |
| 1.235327996                        | 1.574159082                                 | 0.479858277                               | 3.279216658                       | 0.763257715                             |
| 0.656544657                        | 1.231478148                                 | 0.473192912                               | 2.482226935                       | 0.553897097                             |
| 1.06396094                         | 1.495782694                                 | 0.486805764                               | 3.078315839                       | 0.728693465                             |
| 1.017350393                        | 1.468243576                                 | 0.481839873                               | 3.004781641                       | 0.695603926                             |
| 0.9992491                          | 1.456271746                                 | 0.48292835                                | 3.057365659                       | 0.687389677                             |
| 1.125776092                        | 1.51288142                                  | 0.478780814                               | 3.130558691                       | 0.722306299                             |
| 1.417904062                        | 1.660040347                                 | 0.45938522                                | 3.515033662                       | 0.80931639                              |
| 1.349473504                        | 1.627159351                                 | 0.470676616                               | 3.4336912                         | 0.795202702                             |
| 1.065334721                        | 1.491575979                                 | 0.469248262                               | 3.038187293                       | 0.693686827                             |
| 1.107543179                        | 1.511627846                                 | 0.49233154                                | 3.170055647                       | 0.753761678                             |
| 0.91911818                         | 1.428253876                                 | 0.450216669                               | 2.763119105                       | 0.635947755                             |
| 1.061885589                        | 1.488699145                                 | 0.458025969                               | 2.983672972                       | 0.678801617                             |
| 0.974821476                        | 1.45252539                                  | 0.462440209                               | 2.858539898                       | 0.662607624                             |
| 1.204521685                        | 1.574150763                                 | 0.45172295                                | 3.318105288                       | 0.735014696                             |
| 1.306048919                        | 1.600073321                                 | 0.465016144                               | 3.316199309                       | 0.764301991                             |
| 1.230094476                        | 1.586788512                                 | 0.463100544                               | 3.299554723                       | 0.757269382                             |
| 0.932218871                        | 1.409793734                                 | 0.480540221                               | 2.889673275                       | 0.653572881                             |
| 1.279068309                        | 1.550792314                                 | 0.476286623                               | 3.135016121                       | 0.739484054                             |
| 0.985815988                        | 1.4356802                                   | 0.469843056                               | 2.979824501                       | 0.657824947                             |
| 1.055470693                        | 1.491201675                                 | 0.458935295                               | 2.913927785                       | 0.683581482                             |
| 1.064896309                        | 1.502272797                                 | 0.48276455                                | 3.199201679                       | 0.722319361                             |
| 0.87994402                         | 1.398334206                                 | 0.471805708                               | 2.84669283                        | 0.642240868                             |
| 1.426181438                        | 1.660490911                                 | 0.487532651                               | 3.636049218                       | 0.865131625                             |
| 1.036228713                        | 1.490736815                                 | 0.465109574                               | 3.042005246                       | 0.691722912                             |
| 1.583690251                        | 1.716205322                                 | 0.466605249                               | 3.533710463                       | 0.863111548                             |
| 1.201968588                        | 1.55193572                                  | 0.453795312                               | 3.06042998                        | 0.720408943                             |
| 1.077768896                        | 1.496798349                                 | 0.482132294                               | 3.14045531                        | 0.712467471                             |
| 1.145808611                        | 1.540788724                                 | 0.47114192                                | 3.185901846                       | 0.73086989                              |
| 0.895801924                        | 1.418377084                                 | 0.443571741                               | 2.672350197                       | 0.628212222                             |
| 1.515252542                        | 1.700471347                                 | 0.463471744                               | 3.548071262                       | 0.854362534                             |
| 0.881797579                        | 1.402223585                                 | 0.465186109                               | 2.838597651                       | 0.638442253                             |
| 1.334530673                        | 1.620394327                                 | 0.477530644                               | 3.389306512                       | 0.796305906                             |
| 1.365169225                        | 1.639450729                                 | 0.480561472                               | 3.516050635                       | 0.829617697                             |
| 1.128257055                        | 1.529824756                                 | 0.488880889                               | 3.205683498                       | 0.749730188                             |
| 0.853058748                        | 1.380229484                                 | 0.463493303                               | 2.78555524                        | 0.622802783                             |
| 1.162531528                        | 1.545491065                                 | 0.470358811                               | 3.167751852                       | 0.734635921                             |
| 0.919366148                        | 1.414836098                                 | 0.47839096                                | 2.870191903                       | 0.656681967                             |
| 1.152838418                        | 1.552002479                                 | 0.467865647                               | 3.221982837                       | 0.740199127                             |
| 1.014780878                        | 1.462496146                                 | 0.478660977                               | 3.005947462                       | 0.684070388                             |
| 1.139158452                        | 1.537793912                                 | 0.465952866                               | 3.092769122                       | 0.724543944                             |
| 1.392995378                        | 1.644437022                                 | 0.487990039                               | 3.533731674                       | 0.830624103                             |
| 1.024177356                        | 1.472337379                                 | 0.457115644                               | 2.925681927                       | 0.669374166                             |
| 1.43012748                         | 1.645780139                                 | 0.464374023                               | 3.37100031                        | 0.799102145                             |
| 1.23571665                         | 1.582016408                                 | 0.469828882                               | 3.309496788                       | 0.759192722                             |
| 1.193088322                        | 1.561146831                                 | 0.46424894                                | 3.196190878                       | 0.735827757                             |
| 0.645558835                        | 1.219844988                                 | 0.47227224                                | 2.397910791                       | 0.549782946                             |
| 1.086666205                        | 1.495259445                                 | 0.46932049                                | 3.011395222                       | 0.695037655                             |
| 1.134472924                        | 1.514885123                                 | 0.475837787                               | 2.994455783                       | 0.71577042                              |
| 1.2424675                          | 1.586846646                                 | 0.468949182                               | 3.28584988                        | 0.761664149                             |
| 1.176782485                        | 1.556759012                                 | 0.462804252                               | 3.207341057                       | 0.732270161                             |
| 0.754223493                        | 1.303088953                                 | 0.475468594                               | 2.590759918                       | 0.589419515                             |
| 1.00660929                         | 1.468748149                                 | 0.470414291                               | 2.975485926                       | 0.686531295                             |
| 1.055623363                        | 1.487376133                                 | 0.455495259                               | 2.994137397                       | 0.676356227                             |
| 1.118878815                        | 1.526107514                                 | 0.465062308                               | 3.162627962                       | 0.714765773                             |
| 1.599103168                        | 1.72777708                                  | 0.474913669                               | 3.689271404                       | 0.895203788                             |
| 1.298759627                        | 1.602356329                                 | 0.495719173                               | 3.445361852                       | 0.816899911                             |
| 1.015456314                        | 1.47672194                                  | 0.468292549                               | 2.972831751                       | 0.689194091                             |
| 0.826827362                        | 1.364964713                                 | 0.46911472                                | 2.742713677                       | 0.618236387                             |
| 1.075003953                        | 1.488002494                                 | 0.471506552                               | 2.92271124                        | 0.695828428                             |
| 0.915618686                        | 1.41537851                                  | 0.477729795                               | 2.868595208                       | 0.656515551                             |
| 1.435079167                        | 1.67079789                                  | 0.458570686                               | 3.507048077                       | 0.818329065                             |
| 1.735065481                        | 1.771183257                                 | 0.475669535                               | 3.75680314                        | 0.924478658                             |
| 1.337982513                        | 1.629374311                                 | 0.45499827                                | 3.295329866                       | 0.78228529                              |
| 1.07635167                         | 1.493422414                                 | 0.467305584                               | 3.032132074                       | 0.692249143                             |
| 0.665232673                        | 1.243899382                                 | 0.463743308                               | 2.50424916                        | 0.551090486                             |
| 1.323182332                        | 1.623193294                                 | 0.462590347                               | 3.359200961                       | 0.788414694                             |
| 0.520436025                        | 1.119676313                                 | 0.422782794                               | 2.041592752                       | 0.46493406                              |
| 1.303663352                        | 1.611113785                                 | 0.471498215                               | 3.356924578                       | 0.785625635                             |
| 1.019582468                        | 1.476757607                                 | 0.471975114                               | 3.054602304                       | 0.68899104                              |
| 1.021530919                        | 1.469014346                                 | 0.457011792                               | 2.904263943                       | 0.667359026                             |
| 0.946586741                        | 1.437658933                                 | 0.44342706                                | 2.800813851                       | 0.636165618                             |
| 0.663313531                        | 1.217658499                                 | 0.489030352                               | 2.515482327                       | 0.565715317                             |
| 1.203112811                        | 1.564631272                                 | 0.48897587                                | 3.340352874                       | 0.776648814                             |
| 1.257562025                        | 1.592563612                                 | 0.479726995                               | 3.37886628                        | 0.780433266                             |
| 0.907452371                        | 1.413802089                                 | 0.468587741                               | 2.900971587                       | 0.645468015                             |
| 1.204426189                        | 1.571920877                                 | 0.477673955                               | 3.313655209                       | 0.765506181                             |
| 1.370896833                        | 1.620518112                                 | 0.463316387                               | 3.325602442                       | 0.776346362                             |
| 0.985857707                        | 1.462171165                                 | 0.475647176                               | 3.039149822                       | 0.686538686                             |
| 1.369257122                        | 1.622684871                                 | 0.462936476                               | 3.290051982                       | 0.78234719                              |
| 0.727677959                        | 1.296379402                                 | 0.46484059                                | 2.537467779                       | 0.581123372                             |
| 0.801118257                        | 1.33569338                                  | 0.477853826                               | 2.709365731                       | 0.609309908                             |

| log.sigma.0.5.mm.3D_glmc_DifferenceVariance | log.sigma.0.5.mm.3D_glmc_ldn | log.sigma.0.5.mm.3D_glmc_ldm | log.sigma.0.5.mm.3D_glmc_Correlation | log.sigma.0.5.mm.3D_glmc_Autocorrelation |
|---------------------------------------------|------------------------------|------------------------------|--------------------------------------|------------------------------------------|
| 0.921761353                                 | 0.912130809                  | 0.607201363                  | 0.009552219                          | 43.12252749                              |
| 0.433372152                                 | 0.916647882                  | 0.716058858                  | 0.02679919                           | 13.37219697                              |
| 0.392448692                                 | 0.919355687                  | 0.723649454                  | 0.05444034                           | 13.32948668                              |
| 0.698038871                                 | 0.912053909                  | 0.671835528                  | 0.049123403                          | 20.72801465                              |
| 0.569141653                                 | 0.917140673                  | 0.685230514                  | 0.043025393                          | 21.15033924                              |
| 0.76463256                                  | 0.909972613                  | 0.628077985                  | 0.061317308                          | 21.0690405                               |
| 0.478226084                                 | 0.928282949                  | 0.690423181                  | 0.044424792                          | 21.41339095                              |
| 0.579411741                                 | 0.928191487                  | 0.695190724                  | 0.037537803                          | 21.62360862                              |
| 0.610198588                                 | 0.923678978                  | 0.677468073                  | 0.019568447                          | 21.34629375                              |
| 0.656398969                                 | 0.909782926                  | 0.661393984                  | 0.022806834                          | 21.35434849                              |
| 0.430552041                                 | 0.916864633                  | 0.716692939                  | 0.02629893                           | 12.94240375                              |
| 0.842672173                                 | 0.921954058                  | 0.647464634                  | 0.015315973                          | 31.89734821                              |
| 0.529504049                                 | 0.923443648                  | 0.707471608                  | 0.032492409                          | 21.2757557                               |
| 0.716213507                                 | 0.920375799                  | 0.668147034                  | 0.047785741                          | 31.52937768                              |
| 0.862901532                                 | 0.927385583                  | 0.642911852                  | 0.007370596                          | 31.5481492                               |
| 0.523484912                                 | 0.930457017                  | 0.702089256                  | 0.039798318                          | 21.27645253                              |
| 0.545923383                                 | 0.90035671                   | 0.665408091                  | 0.031393184                          | 12.79121367                              |
| 0.451511483                                 | 0.92772123                   | 0.720681123                  | 0.04403543                           | 21.60804045                              |
| 0.448459811                                 | 0.92212901                   | 0.69863821                   | 0.017599115                          | 21.22286133                              |
| 0.651836407                                 | 0.920033698                  | 0.663745118                  | 0.04440029                           | 21.366735                                |
| 0.349443545                                 | 0.922656774                  | 0.733285623                  | 0.035476006                          | 13.19362295                              |
| 0.531316951                                 | 0.886122901                  | 0.668961338                  | 0.001721899                          | 13.06379173                              |
| 0.532643361                                 | 0.917246721                  | 0.683753049                  | 0.014058457                          | 21.2620969                               |
| 0.525149891                                 | 0.918127475                  | 0.686739535                  | 0.035657539                          | 21.47710504                              |
| 0.601590015                                 | 0.914852248                  | 0.677697874                  | 0.029697638                          | 21.70999209                              |
| 0.76107461                                  | 0.92416631                   | 0.653514953                  | 0.065531079                          | 32.13203388                              |
| 0.71539932                                  | 0.917310743                  | 0.655791776                  | 0.032056397                          | 21.50271234                              |
| 0.58364355                                  | 0.918036904                  | 0.689184968                  | 0.03273055                           | 21.19458034                              |
| 0.53869969                                  | 0.898380422                  | 0.658292107                  | 0.00245505                           | 13.10275725                              |
| 0.514247524                                 | 0.924189094                  | 0.709730323                  | 0.018851789                          | 21.42401116                              |
| 0.600674818                                 | 0.935326809                  | 0.697115618                  | 0.035674917                          | 31.91632071                              |
| 0.535228641                                 | 0.921214729                  | 0.699182942                  | 0.009615472                          | 20.82569612                              |
| 0.662969829                                 | 0.930466305                  | 0.677685791                  | 0.068649755                          | 21.1426222                               |
| 0.721061985                                 | 0.920541118                  | 0.669339095                  | 0.047533941                          | 21.34606741                              |
| 0.656014263                                 | 0.920755494                  | 0.667367297                  | 0.042534461                          | 21.78077484                              |
| 0.50418075                                  | 0.937011054                  | 0.700171362                  | 0.036972281                          | 21.41938529                              |
| 0.731500573                                 | 0.936431199                  | 0.679484252                  | -0.00990695                          | 43.23008285                              |
| 0.552034777                                 | 0.936960524                  | 0.70234424                   | 0.052237777                          | 31.28579274                              |
| 0.587643754                                 | 0.919298258                  | 0.694184971                  | -0.022621902                         | 20.9036774                               |
| 0.542644036                                 | 0.90259749                   | 0.67269785                   | 0.034889726                          | 12.6986289                               |
| 0.466648494                                 | 0.912297364                  | 0.702517022                  | 0.035083725                          | 12.82887957                              |
| 0.676524138                                 | 0.899215306                  | 0.62284681                   | 0.032270519                          | 12.63188023                              |
| 0.556796514                                 | 0.918019159                  | 0.687890031                  | 0.033350867                          | 21.37893098                              |
| 0.837408033                                 | 0.901102569                  | 0.636868297                  | -0.001186234                         | 20.95356952                              |
| 0.680536332                                 | 0.93196055                   | 0.685421512                  | 0.026915276                          | 32.04079189                              |
| 0.568827213                                 | 0.924628272                  | 0.679331804                  | 0.03342743                           | 13.36549568                              |
| 0.610948492                                 | 0.923095791                  | 0.675001793                  | 0.041552615                          | 21.39353549                              |
| 0.499895614                                 | 0.914771145                  | 0.712464172                  | -0.001023273                         | 13.2049159                               |
| 0.783014251                                 | 0.901586068                  | 0.636313559                  | 0.038230213                          | 13.2264679                               |
| 0.47307669                                  | 0.923419576                  | 0.70482551                   | 0.043756468                          | 21.8356297                               |
| 0.70002499                                  | 0.917030125                  | 0.653632305                  | 0.048833333                          | 21.7058578                               |
| 0.675132845                                 | 0.913414328                  | 0.637496678                  | 0.03118642                           | 21.17139325                              |
| 0.565251491                                 | 0.911264751                  | 0.662448285                  | 0.021921174                          | 21.13514842                              |
| 0.464402131                                 | 0.914913656                  | 0.711427122                  | 0.038566502                          | 13.41288207                              |
| 0.620971921                                 | 0.913659557                  | 0.674206107                  | 0.056876017                          | 21.8109638                               |
| 0.487252778                                 | 0.910598434                  | 0.69762842                   | 0.035256507                          | 12.94704172                              |
| 0.604065507                                 | 0.922083349                  | 0.670418986                  | 0.025617625                          | 21.44743041                              |
| 0.546389057                                 | 0.918747585                  | 0.690249572                  | 0.027072654                          | 20.84546901                              |
| 0.613562657                                 | 0.923797722                  | 0.678236922                  | 0.01401524                           | 21.11672366                              |
| 0.702748497                                 | 0.913501697                  | 0.639108356                  | 0.017631998                          | 20.69281313                              |
| 0.575179872                                 | 0.929270414                  | 0.699641517                  | 0.02880341                           | 21.63130569                              |
| 0.789332501                                 | 0.931686404                  | 0.658631674                  | -0.001062184                         | 31.8364859                               |
| 0.658297273                                 | 0.928114476                  | 0.666359197                  | 0.048330112                          | 32.11753545                              |
| 0.650708408                                 | 0.922914596                  | 0.675885295                  | 0.031819981                          | 21.04873275                              |
| 0.342263508                                 | 0.910602292                  | 0.734686116                  | 0.027895192                          | 13.08237522                              |
| 0.602305249                                 | 0.926751948                  | 0.68981829                   | 0.01135747                           | 21.0939805                               |
| 0.620943559                                 | 0.915803466                  | 0.682182595                  | -0.020261396                         | 20.8602653                               |
| 0.661538864                                 | 0.927911881                  | 0.665735989                  | 0.028277375                          | 31.20649223                              |
| 0.640095101                                 | 0.936581243                  | 0.676697696                  | 0.034399741                          | 31.80382818                              |
| 0.406487953                                 | 0.918575362                  | 0.721594733                  | 0.019797598                          | 21.22113447                              |
| 0.532709788                                 | 0.907295371                  | 0.688427218                  | 0.026958045                          | 12.96752702                              |
| 0.597338866                                 | 0.928718123                  | 0.698209435                  | 0.045082742                          | 21.75916875                              |
| 0.606642181                                 | 0.92476088                   | 0.681905199                  | 0.04472564                           | 21.30178234                              |
| 0.796425113                                 | 0.907777053                  | 0.620862113                  | 0.021853349                          | 20.85541485                              |
| 0.629782214                                 | 0.904183843                  | 0.638932614                  | 0.017773368                          | 12.7091967                               |
| 0.538335014                                 | 0.907020262                  | 0.687683092                  | 0.019652573                          | 12.82012633                              |
| 0.444217193                                 | 0.933531647                  | 0.71154881                   | 0.043148628                          | 21.54080317                              |
| 0.589051077                                 | 0.917848039                  | 0.688838096                  | -0.00246375                          | 21.07472576                              |
| 0.483850206                                 | 0.921346127                  | 0.697280674                  | 0.019758427                          | 21.18818563                              |
| 0.764262667                                 | 0.915372331                  | 0.650145117                  | 0.019508432                          | 20.78498681                              |
| 0.897376611                                 | 0.914402541                  | 0.61586506                   | 0.013142838                          | 43.21583239                              |
| 0.724052692                                 | 0.918776853                  | 0.662675128                  | 0.003224813                          | 20.68863614                              |
| 0.596096569                                 | 0.927006397                  | 0.690773198                  | 0.014309533                          | 21.24222485                              |
| 0.360410522                                 | 0.910768644                  | 0.735809196                  | 0.040951802                          | 12.9840559                               |
| 0.69900765                                  | 0.908306383                  | 0.657955319                  | 0.01746954                           | 20.98252264                              |
| 0.301399407                                 | 0.923783964                  | 0.773083166                  | 0.041112517                          | 13.31232223                              |
| 0.684624082                                 | 0.918046571                  | 0.657441224                  | 0.014245401                          | 20.65372516                              |
| 0.544085974                                 | 0.918179496                  | 0.687919807                  | 0.051899098                          | 21.95464224                              |
| 0.575462093                                 | 0.921085236                  | 0.700530661                  | 0.022312803                          | 21.42747663                              |
| 0.540005094                                 | 0.924461623                  | 0.711984418                  | 0.022723353                          | 21.5003232                               |
| 0.341984039                                 | 0.930603294                  | 0.726762428                  | 0.05729767                           | 21.68394462                              |
| 0.59872889                                  | 0.908506641                  | 0.653669925                  | 0.031950795                          | 21.64449392                              |
| 0.648170097                                 | 0.918238207                  | 0.656261405                  | 0.02263949                           | 20.86821165                              |
| 0.490037162                                 | 0.922748825                  | 0.70304273                   | 0.053586204                          | 21.62591657                              |
| 0.617957525                                 | 0.919535855                  | 0.660176788                  | 0.016098677                          | 20.78198626                              |
| 0.766945626                                 | 0.933523213                  | 0.667402591                  | 0.042422326                          | 44.13977094                              |
| 0.514046202                                 | 0.906996567                  | 0.686456571                  | 0.035459861                          | 12.77720442                              |
| 0.754688433                                 | 0.909507856                  | 0.664348776                  | -0.002380163                         | 20.95561993                              |
| 0.388870123                                 | 0.906542927                  | 0.72407161                   | 0.022600794                          | 12.84288948                              |
| 0.429208354                                 | 0.926359195                  | 0.714287145                  | 0.032684505                          | 21.70315708                              |

| log.sigma.0.5.mm.3D_glcm_SumEntropy | log.sigma.0.5.mm.3D_glcm_AverageIntensity | log.sigma.0.5.mm.3D_glcm_Energy | log.sigma.0.5.mm.3D_glcm_SumSquares | log.sigma.0.5.mm.3D_glcm_ClusterProminence |
|-------------------------------------|-------------------------------------------|---------------------------------|-------------------------------------|--------------------------------------------|
| 2.441599232                         | 6.566112018                               | 0.116769426                     | 0.922500215                         | 14.2857459                                 |
| 1.869255276                         | 3.655183807                               | 0.228016333                     | 0.412684307                         | 3.13580005                                 |
| 1.869467362                         | 3.647937294                               | 0.225132131                     | 0.388045628                         | 2.497213102                                |
| 2.20554352                          | 4.549196866                               | 0.164363998                     | 0.668551578                         | 8.882098836                                |
| 2.072756                            | 4.596361778                               | 0.192863743                     | 0.554523774                         | 5.773410919                                |
| 2.371097972                         | 4.584396145                               | 0.135929384                     | 0.816799018                         | 14.48522115                                |
| 2.02641476                          | 4.62513186                                | 0.186661328                     | 0.485489987                         | 4.231467294                                |
| 2.05337506                          | 4.647933745                               | 0.20643972                      | 0.541533933                         | 6.174055076                                |
| 2.108549129                         | 4.618968014                               | 0.181180693                     | 0.579978136                         | 6.155710709                                |
| 2.18733361                          | 4.619496477                               | 0.16351618                      | 0.64175239                          | 7.11808364                                 |
| 1.867280476                         | 3.596019365                               | 0.218944202                     | 0.409513298                         | 2.788974929                                |
| 2.298657502                         | 5.646706993                               | 0.15666381                      | 0.785936792                         | 12.52531498                                |
| 1.952940598                         | 4.610862715                               | 0.21475694                      | 0.487872386                         | 5.941006737                                |
| 2.213158198                         | 5.612168325                               | 0.171168545                     | 0.684216493                         | 11.50157437                                |
| 2.311364621                         | 5.616319536                               | 0.151032427                     | 0.803448893                         | 12.68968854                                |
| 2.001968885                         | 4.6105036                                 | 0.202280372                     | 0.495309287                         | 5.221127852                                |
| 2.141285862                         | 3.573860838                               | 0.151945506                     | 0.566237037                         | 4.633941227                                |
| 1.888010313                         | 4.646402685                               | 0.23201952                      | 0.425253342                         | 3.937700395                                |
| 1.938967591                         | 4.606007004                               | 0.198414286                     | 0.441646308                         | 3.030336931                                |
| 2.208240416                         | 4.619294928                               | 0.164415465                     | 0.646434668                         | 8.831736712                                |
| 1.762284161                         | 3.630596409                               | 0.237080728                     | 0.340615174                         | 1.815186385                                |
| 2.055732101                         | 3.614288661                               | 0.174152715                     | 0.5324992                           | 4.24175535                                 |
| 2.036635891                         | 4.610048206                               | 0.1837704                       | 0.516376109                         | 4.805761309                                |
| 2.066556129                         | 4.632389206                               | 0.176279895                     | 0.517567761                         | 4.75218463                                 |
| 2.119437545                         | 4.657448482                               | 0.179568646                     | 0.580932114                         | 6.854756859                                |
| 2.334992796                         | 5.663830572                               | 0.150270595                     | 0.760995351                         | 12.56756773                                |
| 2.260233333                         | 4.634700669                               | 0.151224701                     | 0.69696639                          | 9.042316909                                |
| 2.068108182                         | 4.601767715                               | 0.189530588                     | 0.550934211                         | 6.463246947                                |
| 2.098624225                         | 3.619526144                               | 0.159064172                     | 0.55546539                          | 4.096085002                                |
| 1.917134825                         | 4.627609715                               | 0.227885918                     | 0.468768496                         | 4.807784129                                |
| 2.048071032                         | 5.647691243                               | 0.204599901                     | 0.550741929                         | 7.509112987                                |
| 1.955401785                         | 4.563037577                               | 0.206444243                     | 0.491779818                         | 4.555351784                                |
| 2.229900103                         | 4.593199123                               | 0.16037426                      | 0.64731315                          | 8.751425817                                |
| 2.228807934                         | 4.616627054                               | 0.167788666                     | 0.685777873                         | 10.4800036                                 |
| 2.211483251                         | 4.664006764                               | 0.167074102                     | 0.64274065                          | 7.586720348                                |
| 1.994140026                         | 4.626180513                               | 0.200658514                     | 0.483846686                         | 4.859321223                                |
| 2.111274317                         | 6.575421661                               | 0.181217165                     | 0.63342091                          | 9.912100818                                |
| 2.054196756                         | 5.59094847                                | 0.189634081                     | 0.519953597                         | 6.059004347                                |
| 1.981573023                         | 4.573347059                               | 0.199259218                     | 0.515884323                         | 4.590626798                                |
| 2.130142077                         | 3.560807102                               | 0.155745834                     | 0.551746945                         | 4.493645308                                |
| 1.952441621                         | 3.579518935                               | 0.200892609                     | 0.45587094                          | 3.462779224                                |
| 2.345302818                         | 3.550796963                               | 0.112806                        | 0.736798256                         | 7.187809602                                |
| 2.063881202                         | 4.621805032                               | 0.189039011                     | 0.535885869                         | 5.513678983                                |
| 2.298534419                         | 4.577619193                               | 0.145853276                     | 0.790752652                         | 11.76922597                                |
| 2.105651496                         | 5.65900587                                | 0.201415624                     | 0.617279077                         | 9.13969321                                 |
| 2.106620764                         | 3.653196077                               | 0.175881073                     | 0.558324646                         | 5.975302246                                |
| 2.144535464                         | 4.62258302                                | 0.176034471                     | 0.598102088                         | 7.564711008                                |
| 1.872203684                         | 3.633928589                               | 0.238794578                     | 0.447297001                         | 3.653998739                                |
| 2.331340613                         | 3.63262398                                | 0.145993744                     | 0.788176003                         | 11.01390502                                |
| 1.969121444                         | 4.670606988                               | 0.210140491                     | 0.461648871                         | 4.142762598                                |
| 2.269634985                         | 4.655267454                               | 0.157123546                     | 0.70154191                          | 9.972803119                                |
| 2.293086725                         | 4.598873902                               | 0.133598333                     | 0.704264115                         | 7.990488619                                |
| 2.135119342                         | 4.595922236                               | 0.165288012                     | 0.576638229                         | 5.339827537                                |
| 1.934079445                         | 3.660035833                               | 0.214586664                     | 0.443505788                         | 3.8594024                                  |
| 2.166760791                         | 4.666295014                               | 0.180967814                     | 0.617258485                         | 8.484786028                                |
| 1.982295391                         | 3.595864072                               | 0.20055765                      | 0.476434019                         | 4.082090919                                |
| 2.144054279                         | 4.629516408                               | 0.168312937                     | 0.591375078                         | 5.968589405                                |
| 2.039285991                         | 4.564142878                               | 0.186276587                     | 0.521431255                         | 5.062479062                                |
| 2.08812056                          | 4.594442105                               | 0.184003795                     | 0.577335092                         | 6.690556307                                |
| 2.289854324                         | 4.547555713                               | 0.130235172                     | 0.709012176                         | 8.208564625                                |
| 2.011679306                         | 4.649304448                               | 0.211263888                     | 0.527911122                         | 6.39448896                                 |
| 2.21959469                          | 5.642536463                               | 0.16184614                      | 0.713253444                         | 11.0088443                                 |
| 2.210391574                         | 5.664448753                               | 0.166058927                     | 0.649279989                         | 8.725463684                                |
| 2.156495649                         | 4.585737466                               | 0.17494313                      | 0.616245237                         | 7.849959971                                |
| 2.170408687                         | 3.615631986                               | 0.247835044                     | 0.332164878                         | 1.675678367                                |
| 2.046835118                         | 4.592154176                               | 0.193400064                     | 0.549425007                         | 6.363583081                                |
| 2.014446585                         | 4.568594029                               | 0.193423952                     | 0.555429387                         | 6.372552111                                |
| 2.187264425                         | 5.58464811                                | 0.164835868                     | 0.639410651                         | 7.906759951                                |
| 2.151933102                         | 5.637621641                               | 0.177395056                     | 0.609413853                         | 7.919232472                                |
| 1.823786261                         | 4.60579224                                | 0.226561301                     | 0.384874497                         | 2.628130106                                |
| 2.026622851                         | 3.599172208                               | 0.19250887                      | 0.51674632                          | 4.899107936                                |
| 2.066344178                         | 4.661990525                               | 0.204323103                     | 0.552776217                         | 7.401289537                                |
| 2.129790036                         | 4.612512852                               | 0.178782361                     | 0.58585616                          | 6.784917666                                |
| 2.378358626                         | 4.564797413                               | 0.121696354                     | 0.817555326                         | 10.37027696                                |
| 2.241937671                         | 3.563315321                               | 0.134767324                     | 0.661283921                         | 6.587452085                                |
| 2.00483165                          | 3.579127339                               | 0.194381273                     | 0.517615577                         | 4.762726926                                |
| 1.914623475                         | 4.639171166                               | 0.216247255                     | 0.432271656                         | 4.125451847                                |
| 2.005323895                         | 4.59093414                                | 0.201111024                     | 0.535518349                         | 5.991685229                                |
| 1.965527417                         | 4.602081922                               | 0.197501752                     | 0.466796834                         | 3.824761688                                |
| 2.295289361                         | 4.55744797                                | 0.140665437                     | 0.732126108                         | 8.959950919                                |
| 2.414046887                         | 6.572982101                               | 0.123048626                     | 0.888230223                         | 13.88012413                                |
| 2.191392227                         | 4.548291478                               | 0.164388966                     | 0.670644741                         | 7.835160023                                |
| 2.055467946                         | 4.608134774                               | 0.189247156                     | 0.545447707                         | 6.111461654                                |
| 1.774819921                         | 3.601418424                               | 0.231445382                     | 0.346747678                         | 1.710736517                                |
| 2.215317346                         | 4.579431077                               | 0.157297914                     | 0.672885265                         | 7.696742066                                |
| 1.519419754                         | 3.647083736                               | 0.300304173                     | 0.271296771                         | 1.179892236                                |
| 2.205624392                         | 4.543613935                               | 0.153114246                     | 0.661092216                         | 7.324651824                                |
| 2.083916393                         | 4.682531426                               | 0.189946991                     | 0.538052918                         | 5.850119466                                |
| 2.00905446                          | 4.627704489                               | 0.21035062                      | 0.522536481                         | 5.836405993                                |
| 1.940832251                         | 4.635698872                               | 0.227795295                     | 0.483865078                         | 4.94899988                                 |
| 1.807078224                         | 4.654404689                               | 0.231219827                     | 0.351943894                         | 2.081205733                                |
| 2.20543096                          | 4.650228022                               | 0.146294595                     | 0.62129868                          | 6.078713385                                |
| 2.204830142                         | 4.566571628                               | 0.154929753                     | 0.643388607                         | 7.007318016                                |
| 2.004583561                         | 4.647581477                               | 0.203982401                     | 0.479547638                         | 4.36946695                                 |
| 2.179620642                         | 4.55764819                                | 0.149869876                     | 0.612017983                         | 5.844553201                                |
| 2.247319915                         | 6.641455111                               | 0.16997562                      | 0.716081259                         | 12.23240562                                |
| 2.05121887                          | 3.571991012                               | 0.178094026                     | 0.510987043                         | 4.251448495                                |
| 2.177618753                         | 4.577977676                               | 0.168392871                     | 0.682320213                         | 9.188850979                                |
| 1.785109651                         | 3.582546491                               | 0.230598059                     | 0.372054834                         | 1.946164218                                |
| 1.894905605                         | 4.65716464                                | 0.219245571                     | 0.414464013                         | 3.242582123                                |

| log.sigma.0.5.mm.3D_glc_m_SumAverage | log.sigma.0.5.mm.3D_glc_m_lmc2 | log.sigma.0.5.mm.3D_glc_m_lmc1 | log.sigma.0.5.mm.3D_glc_m_DifferenceAverage | log.sigma.0.5.mm.3D_glc_m_Id |
|--------------------------------------|--------------------------------|--------------------------------|---------------------------------------------|------------------------------|
| 13.13222404                          | 0.269671663                    | -0.020261059                   | 0.951264434                                 | 0.636183187                  |
| 7.310367614                          | 0.243160325                    | -0.025087654                   | 0.606653006                                 | 0.725637783                  |
| 7.295874587                          | 0.202782549                    | -0.016854337                   | 0.582626884                                 | 0.731743804                  |
| 9.098393721                          | 0.286131446                    | -0.026530574                   | 0.756136942                                 | 0.691486366                  |
| 9.192723556                          | 0.204041729                    | -0.014609333                   | 0.700785588                                 | 0.701897802                  |
| 9.168792289                          | 0.356806442                    | -0.040439211                   | 0.870808926                                 | 0.652146826                  |
| 9.25026372                           | 0.17949899                     | -0.011474394                   | 0.670146286                                 | 0.703129434                  |
| 9.29586749                           | 0.22074473                     | -0.017720403                   | 0.6801057                                   | 0.710156287                  |
| 9.237936029                          | 0.175708185                    | -0.010548363                   | 0.725538404                                 | 0.695133368                  |
| 9.238992954                          | 0.259542709                    | -0.022543854                   | 0.771340038                                 | 0.680574715                  |
| 7.19203873                           | 0.164262666                    | -0.010523431                   | 0.604912862                                 | 0.726445589                  |
| 11.29341399                          | 0.232090374                    | -0.017347526                   | 0.839075917                                 | 0.670213501                  |
| 9.22172543                           | 0.286259567                    | -0.032557342                   | 0.64290641                                  | 0.718386495                  |
| 11.22433665                          | 0.29772906                     | -0.028373136                   | 0.765358904                                 | 0.686664183                  |
| 11.23263907                          | 0.279700171                    | -0.023589199                   | 0.855580177                                 | 0.666960875                  |
| 9.221007201                          | 0.198115179                    | -0.013916458                   | 0.653570751                                 | 0.714049955                  |
| 7.147721677                          | 0.217112945                    | -0.016536802                   | 0.739660695                                 | 0.682806735                  |
| 9.292805369                          | 0.24432702                     | -0.024459971                   | 0.600267173                                 | 0.72970899                   |
| 9.212001408                          | 0.198115617                    | -0.014851776                   | 0.646542903                                 | 0.709930434                  |
| 9.238589855                          | 0.201385184                    | -0.013316918                   | 0.763257715                                 | 0.681963273                  |
| 7.261192817                          | 0.179500823                    | -0.013911563                   | 0.553897097                                 | 0.739171753                  |
| 7.228577321                          | 0.186834448                    | -0.012173297                   | 0.728693465                                 | 0.685918405                  |
| 9.220096411                          | 0.253560682                    | -0.023239236                   | 0.695603926                                 | 0.698188505                  |
| 9.264778412                          | 0.222718105                    | -0.016865236                   | 0.687389677                                 | 0.700479835                  |
| 9.314896964                          | 0.268091224                    | -0.025833381                   | 0.722306299                                 | 0.693385123                  |
| 11.32766114                          | 0.281810746                    | -0.024897981                   | 0.80931639                                  | 0.675455776                  |
| 9.269401339                          | 0.263053151                    | -0.021363184                   | 0.795202702                                 | 0.676280138                  |
| 9.20353543                           | 0.222627995                    | -0.01790807                    | 0.693686827                                 | 0.70358598                   |
| 7.239052288                          | 0.241793683                    | -0.019411147                   | 0.753761678                                 | 0.676833932                  |
| 9.255219431                          | 0.198630973                    | -0.015886815                   | 0.635947755                                 | 0.722196503                  |
| 11.29538249                          | 0.237287048                    | -0.020361453                   | 0.678801617                                 | 0.711006104                  |
| 9.126075155                          | 0.218958456                    | -0.017391286                   | 0.662607624                                 | 0.712455146                  |
| 9.186398245                          | 0.259513934                    | -0.022527556                   | 0.735014696                                 | 0.695943217                  |
| 9.233254108                          | 0.255598205                    | -0.02092614                    | 0.764301991                                 | 0.687652716                  |
| 9.328013529                          | 0.21726897                     | -0.015107282                   | 0.757269382                                 | 0.686561534                  |
| 9.252361026                          | 0.247202725                    | -0.022986656                   | 0.653572881                                 | 0.71149028                   |
| 13.15084332                          | 0.300768445                    | -0.030579427                   | 0.739484054                                 | 0.694584278                  |
| 11.18189694                          | 0.266610437                    | -0.024989884                   | 0.657824947                                 | 0.714130302                  |
| 9.146694119                          | 0.22075809                     | -0.017418043                   | 0.683581482                                 | 0.708624265                  |
| 7.121614204                          | 0.154056109                    | -0.007922451                   | 0.722319361                                 | 0.689264873                  |
| 7.159037869                          | 0.208223639                    | -0.016365801                   | 0.642240868                                 | 0.714421584                  |
| 7.101593925                          | 0.159196534                    | -0.007407344                   | 0.865131625                                 | 0.648429806                  |
| 9.243610064                          | 0.198093018                    | -0.014095209                   | 0.691722912                                 | 0.703114412                  |
| 9.155238386                          | 0.248854265                    | -0.018761606                   | 0.863111548                                 | 0.661074874                  |
| 11.31801174                          | 0.286367373                    | -0.029582724                   | 0.720408943                                 | 0.701800692                  |
| 7.306392154                          | 0.248486385                    | -0.021421489                   | 0.712467471                                 | 0.694480512                  |
| 9.245166041                          | 0.22238498                     | -0.016755546                   | 0.73086989                                  | 0.691996085                  |
| 7.267857178                          | 0.216388347                    | -0.019029952                   | 0.628212222                                 | 0.725110409                  |
| 7.26524796                           | 0.311470872                    | -0.028811633                   | 0.854362534                                 | 0.661206648                  |
| 9.341213977                          | 0.227744693                    | -0.020007174                   | 0.638442253                                 | 0.716922641                  |
| 9.310534908                          | 0.217624258                    | -0.014689677                   | 0.796305906                                 | 0.673932004                  |
| 9.197747804                          | 0.177104828                    | -0.010114448                   | 0.829617697                                 | 0.660866284                  |
| 9.191844473                          | 0.164857983                    | -0.009325662                   | 0.749730188                                 | 0.680372766                  |
| 7.320071666                          | 0.234453143                    | -0.021089721                   | 0.622802783                                 | 0.722363342                  |
| 9.332590028                          | 0.271615072                    | -0.025546042                   | 0.734635021                                 | 0.691397972                  |
| 7.191728145                          | 0.185741625                    | -0.012940806                   | 0.656681967                                 | 0.709757964                  |
| 9.259032817                          | 0.200514588                    | -0.013062357                   | 0.740199127                                 | 0.688727078                  |
| 9.128285756                          | 0.216123386                    | -0.016271334                   | 0.684070388                                 | 0.703609344                  |
| 9.18884209                           | 0.219799127                    | -0.016384398                   | 0.724543944                                 | 0.695089958                  |
| 9.095111426                          | 0.201469936                    | -0.01190064                    | 0.830624103                                 | 0.661247792                  |
| 9.298608896                          | 0.273226615                    | -0.026802513                   | 0.669374166                                 | 0.713195214                  |
| 11.28507293                          | 0.270626943                    | -0.023186464                   | 0.799102145                                 | 0.678980853                  |
| 11.32889751                          | 0.244569427                    | -0.019098463                   | 0.759192722                                 | 0.685059339                  |
| 9.171474931                          | 0.210750562                    | -0.01572243                    | 0.735827757                                 | 0.693264242                  |
| 7.231263971                          | 0.185115805                    | -0.014958764                   | 0.549782964                                 | 0.740404836                  |
| 9.184308352                          | 0.247316238                    | -0.02179247                    | 0.695037655                                 | 0.70401872                   |
| 9.137188058                          | 0.249566282                    | -0.02170936                    | 0.71577042                                  | 0.697177444                  |
| 11.16929622                          | 0.209557644                    | -0.014387216                   | 0.761664149                                 | 0.684630206                  |
| 11.27524328                          | 0.203634665                    | -0.013645564                   | 0.732270161                                 | 0.694102003                  |
| 9.211584479                          | 0.160925469                    | -0.010668406                   | 0.589419515                                 | 0.729423502                  |
| 7.198344416                          | 0.228957765                    | -0.019494602                   | 0.686531295                                 | 0.703075191                  |
| 9.323981051                          | 0.248685145                    | -0.021859123                   | 0.676356227                                 | 0.712139534                  |
| 9.225025703                          | 0.278537437                    | -0.026357029                   | 0.714765773                                 | 0.698136447                  |
| 9.129594827                          | 0.2471112983                   | -0.017566259                   | 0.895203788                                 | 0.647572075                  |
| 7.126630643                          | 0.193006231                    | -0.011761703                   | 0.816899911                                 | 0.660628626                  |
| 7.158254677                          | 0.248592152                    | -0.022327439                   | 0.689194091                                 | 0.70268457                   |
| 9.278342332                          | 0.203415902                    | -0.016898779                   | 0.618236387                                 | 0.721968106                  |
| 9.181868279                          | 0.249865325                    | -0.023015255                   | 0.695828428                                 | 0.703039622                  |
| 9.204163844                          | 0.186792593                    | -0.01363607                    | 0.656515551                                 | 0.709574523                  |
| 9.114895939                          | 0.243382182                    | -0.017622244                   | 0.818329065                                 | 0.672826747                  |
| 13.1459642                           | 0.277025837                    | -0.021663143                   | 0.924478658                                 | 0.643103828                  |
| 9.096582956                          | 0.264527904                    | -0.022023931                   | 0.78228529                                  | 0.683345194                  |
| 9.216269548                          | 0.237740867                    | -0.019468049                   | 0.692249143                                 | 0.705003441                  |
| 7.202836848                          | 0.156437804                    | -0.010961698                   | 0.551090486                                 | 0.742107518                  |
| 9.158862153                          | 0.241090244                    | -0.01931187                    | 0.788414694                                 | 0.678899205                  |
| 7.294167473                          | 0.140447438                    | -0.01654266                    | 0.46493406                                  | 0.776104279                  |
| 9.08722787                           | 0.250082042                    | -0.0204575                     | 0.785625635                                 | 0.677643091                  |
| 9.365062852                          | 0.239598629                    | -0.020875635                   | 0.68899104                                  | 0.702474749                  |
| 9.254048978                          | 0.228069813                    | -0.018791876                   | 0.667359026                                 | 0.713915352                  |
| 9.271397743                          | 0.223923542                    | -0.019655046                   | 0.636165618                                 | 0.724579568                  |
| 9.308809377                          | 0.221965888                    | -0.022450399                   | 0.565715317                                 | 0.732382034                  |
| 9.300456043                          | 0.177303878                    | -0.009836206                   | 0.776648814                                 | 0.673217642                  |
| 9.133143256                          | 0.196905362                    | -0.012276424                   | 0.780433266                                 | 0.676024847                  |
| 9.295162954                          | 0.201907005                    | -0.01551473                    | 0.645468015                                 | 0.715072993                  |
| 9.11529638                           | 0.188582956                    | -0.0111643                     | 0.765506181                                 | 0.67949907                   |
| 13.28291022                          | 0.261056634                    | -0.022051297                   | 0.776346362                                 | 0.686118523                  |
| 7.143982023                          | 0.187686717                    | -0.012112098                   | 0.686538686                                 | 0.701062405                  |
| 9.155955351                          | 0.31038268                     | -0.03137668                    | 0.78234719                                  | 0.683741914                  |
| 7.165092983                          | 0.173718283                    | -0.012729639                   | 0.581123372                                 | 0.732582015                  |
| 9.31432928                           | 0.215886996                    | -0.019157409                   | 0.609309908                                 | 0.723285025                  |

| log.sigma.0.5.mm.3D_glcm_ClusterTendency | log.sigma.0.5.mm.3D_firstorder_InterquartileRange | log.sigma.0.5.mm.3D_firstorder_Skewness | log.sigma.0.5.mm.3D_firstorder_Uniformity |
|------------------------------------------|---------------------------------------------------|-----------------------------------------|-------------------------------------------|
| 1.86234212                               | 22.69390106                                       | -0.673269429                            | 0.323752066                               |
| 0.848673612                              | 11.63540828                                       | -0.521274044                            | 0.466139724                               |
| 0.819052919                              | 10.37441692                                       | -0.403702183                            | 0.459785072                               |
| 1.402422787                              | 16.72363234                                       | -1.146675842                            | 0.392362097                               |
| 1.156339604                              | 16.33584416                                       | -0.892959209                            | 0.426441803                               |
| 1.73767989                               | 20.47964323                                       | -0.285794601                            | 0.352203857                               |
| 1.0139094                                | 15.10627277                                       | -0.285837703                            | 0.416562469                               |
| 1.123570315                              | 12.84458745                                       | -0.649035207                            | 0.434379042                               |
| 1.182692211                              | 17.36667478                                       | -0.735880878                            | 0.412565574                               |
| 1.312540567                              | 19.34512854                                       | -0.907274498                            | 0.389793105                               |
| 0.840924142                              | 15.61498821                                       | -0.6473245                              | 0.457789227                               |
| 1.595632594                              | 19.58512211                                       | -1.069409386                            | 0.379240263                               |
| 1.007083156                              | 9.022771955                                       | -1.017975325                            | 0.450448391                               |
| 1.434225138                              | 17.01929903                                       | -0.683338238                            | 0.395473475                               |
| 1.616961384                              | 18.06755555                                       | -0.828362695                            | 0.369482066                               |
| 1.029963562                              | 12.40125233                                       | -0.909227185                            | 0.436374846                               |
| 1.169830298                              | 20.38285375                                       | -1.175555617                            | 0.384871033                               |
| 0.888202344                              | 10.75493813                                       | -1.007476022                            | 0.47688104                                |
| 0.89431267                               | 15.0482626                                        | -0.41736614                             | 0.434946736                               |
| 1.350410675                              | 17.87628579                                       | -0.735653772                            | 0.38944182                                |
| 0.70591604                               | 9.708653629                                       | -0.140536308                            | 0.480511289                               |
| 1.066035858                              | 18.36064029                                       | -0.651278195                            | 0.407370124                               |
| 1.048154043                              | 15.77226114                                       | -0.709444735                            | 0.412614822                               |
| 1.071021943                              | 16.19801474                                       | -0.460467182                            | 0.407543935                               |
| 1.197952363                              | 15.4264822                                        | -0.668329096                            | 0.404359934                               |
| 1.626077343                              | 20.29998541                                       | -0.15207688                             | 0.361095307                               |
| 1.438392055                              | 19.01500082                                       | -0.440411748                            | 0.367936153                               |
| 1.138402124                              | 14.35930419                                       | -1.024540777                            | 0.42345953                                |
| 1.114318381                              | 19.68024087                                       | -0.346999762                            | 0.403410257                               |
| 0.955955802                              | 13.75258857                                       | -1.080350599                            | 0.471794177                               |
| 1.141082126                              | 12.98555201                                       | -0.811882499                            | 0.433131713                               |
| 0.992297794                              | 11.90499182                                       | -1.187829791                            | 0.450435565                               |
| 1.384730914                              | 16.55331373                                       | -0.146760116                            | 0.382599873                               |
| 1.437062574                              | 16.10346437                                       | -0.762308571                            | 0.390570213                               |
| 1.340868122                              | 18.56297553                                       | -0.485003668                            | 0.387806663                               |
| 1.003167873                              | 12.27083457                                       | -0.463555137                            | 0.430372311                               |
| 1.25461533                               | 13.33630657                                       | -1.044378403                            | 0.410541115                               |
| 1.0939984                                | 8.692008257                                       | -0.849524733                            | 0.419468018                               |
| 1.008066598                              | 15.92619061                                       | -1.333311072                            | 0.439459317                               |
| 1.14209147                               | 19.45520604                                       | -0.198064353                            | 0.385520832                               |
| 0.943539738                              | 12.01970088                                       | -0.635269569                            | 0.437242638                               |
| 1.521011585                              | 25.13153315                                       | 0.020683591                             | 0.331374352                               |
| 1.107314762                              | 16.82226563                                       | -0.766343819                            | 0.421538863                               |
| 1.579320358                              | 20.6668843                                        | -0.781243962                            | 0.36461575                                |
| 1.267147721                              | 16.29309106                                       | -1.030355327                            | 0.431223229                               |
| 1.155529689                              | 16.50215673                                       | -0.082000431                            | 0.394879247                               |
| 1.246599741                              | 16.0586158                                        | -0.251795508                            | 0.399367975                               |
| 0.893386081                              | 12.81502187                                       | -0.809493041                            | 0.48406954                                |
| 1.637451472                              | 20.38176894                                       | -0.601950272                            | 0.370254943                               |
| 0.964797903                              | 14.55508298                                       | -0.772074711                            | 0.446707267                               |
| 1.471636968                              | 19.06412697                                       | -0.625264183                            | 0.380204223                               |
| 1.451887236                              | 23.41193008                                       | -0.244560529                            | 0.352345008                               |
| 1.178295861                              | 18.78363764                                       | -0.438447932                            | 0.391825404                               |
| 0.920964405                              | 14.90717071                                       | -0.248247748                            | 0.45119854                                |
| 1.30650241                               | 15.71125251                                       | -0.280490675                            | 0.408724066                               |
| 0.986369926                              | 15.19704545                                       | -1.00541827                             | 0.437432742                               |
| 1.212661894                              | 19.09102964                                       | -0.583532114                            | 0.392176091                               |
| 1.07094414                               | 14.14665639                                       | -0.888687367                            | 0.421678668                               |
| 1.170181914                              | 16.82579267                                       | -0.735064554                            | 0.417096481                               |
| 1.443053324                              | 19.74970436                                       | -0.355106096                            | 0.354670494                               |
| 1.084987133                              | 12.02555853                                       | -0.52765306                             | 0.433928784                               |
| 1.422886297                              | 17.83734882                                       | -0.914866833                            | 0.386382752                               |
| 1.361403307                              | 16.94438457                                       | -0.434651381                            | 0.381105468                               |
| 1.271892625                              | 16.53453851                                       | -0.65764249                             | 0.402081899                               |
| 0.683100676                              | 13.22119999                                       | -0.735656977                            | 0.493510655                               |
| 1.111033823                              | 13.01029927                                       | -0.880372357                            | 0.42724822                                |
| 1.087244622                              | 13.20446992                                       | -0.9972786                              | 0.429246726                               |
| 1.315175103                              | 16.73949182                                       | -0.600901437                            | 0.392003686                               |
| 1.260872925                              | 18.21904325                                       | -0.71268988                             | 0.400665086                               |
| 0.785274495                              | 11.94819009                                       | -1.082863974                            | 0.467405474                               |
| 1.060375988                              | 14.52343321                                       | -0.793919672                            | 0.423927093                               |
| 1.155481505                              | 12.51001692                                       | -0.634198581                            | 0.430146978                               |
| 1.224545825                              | 15.33271492                                       | -0.417472594                            | 0.400717889                               |
| 1.671118135                              | 23.75675058                                       | -0.471669263                            | 0.334601195                               |
| 1.346376056                              | 22.0322957                                        | -0.285607002                            | 0.353155987                               |
| 1.055005993                              | 15.8987143                                        | -0.775517031                            | 0.433370128                               |
| 0.902259261                              | 13.88636088                                       | 0.022870456                             | 0.451308316                               |
| 1.067069442                              | 14.08321261                                       | -1.167268388                            | 0.441150448                               |
| 0.951568651                              | 15.27279162                                       | -0.846950598                            | 0.433713964                               |
| 1.493425263                              | 20.68809748                                       | -0.457477505                            | 0.365524013                               |
| 1.799855412                              | 21.69249821                                       | -0.694842709                            | 0.331905672                               |
| 1.34459645                               | 15.60317445                                       | -0.779736704                            | 0.389901313                               |
| 1.105439157                              | 12.23327446                                       | -0.761417897                            | 0.418044178                               |
| 0.721758038                              | 14.04398775                                       | -0.549220911                            | 0.479363898                               |
| 1.368358728                              | 17.85437083                                       | -0.639472032                            | 0.381825774                               |
| 0.564751059                              | 6.405395687                                       | -1.836601279                            | 0.547035735                               |
| 1.340705513                              | 18.27730894                                       | -0.612246556                            | 0.379243261                               |
| 1.132629202                              | 15.54565912                                       | -0.500914252                            | 0.412998014                               |
| 1.068615005                              | 14.43029028                                       | -1.182235696                            | 0.454737003                               |
| 0.988873571                              | 12.86592913                                       | -1.150165173                            | 0.466263314                               |
| 0.744462046                              | 9.090936601                                       | -0.222706891                            | 0.469946178                               |
| 1.282081908                              | 21.76960909                                       | -0.352048693                            | 0.368571028                               |
| 1.315992403                              | 19.25467753                                       | -0.515422853                            | 0.382455347                               |
| 1.010738181                              | 13.65899241                                       | -0.71224323                             | 0.439951148                               |
| 1.243645743                              | 21.86777568                                       | -0.340629842                            | 0.379654406                               |
| 1.493428202                              | 13.95165914                                       | -1.040327006                            | 0.392252182                               |
| 1.058090464                              | 16.08524942                                       | -0.471268515                            | 0.411561657                               |
| 1.36002373                               | 15.59750271                                       | -0.973169629                            | 0.394507799                               |
| 0.760541377                              | 11.98038745                                       | -0.83015681                             | 0.475544744                               |
| 0.856737795                              | 10.66185546                                       | -0.468112919                            | 0.45014067                                |



| log.sigma.0.5.mm.3D_firstorder_MeanAbsoluteDeviation | log.sigma.0.5.mm.3D_firstorder_Energy | log.sigma.0.5.mm.3D_firstorder_RobustMeanAbsoluteDeviation | log.sigma.0.5.mm.3D_firstorder_Median |
|------------------------------------------------------|---------------------------------------|------------------------------------------------------------|---------------------------------------|
| 16.57687694                                          | 1113201.798                           | 10.05593579                                                | 3.175710082                           |
| 9.425525158                                          | 194715.8525                           | 5.200812064                                                | 3.444401264                           |
| 9.038534633                                          | 287649.9167                           | 4.975077625                                                | 1.977944314                           |
| 13.32222189                                          | 352816.6108                           | 7.718936768                                                | 3.066188335                           |
| 12.26553499                                          | 701785.8741                           | 7.268437776                                                | 3.827770114                           |
| 14.89289037                                          | 310406.701                            | 8.596175712                                                | 3.474011421                           |
| 11.31300827                                          | 1475840.446                           | 6.744389632                                                | 2.86079216                            |
| 11.1334502                                           | 1534470.208                           | 5.776263714                                                | 3.312461376                           |
| 12.63052739                                          | 1459133.441                           | 7.541880701                                                | 4.246758938                           |
| 13.89787833                                          | 406662.76                             | 8.454417503                                                | 5.606221676                           |
| 10.35871139                                          | 302152.2568                           | 6.61548947                                                 | 3.222209454                           |
| 14.6475177                                           | 1064917.136                           | 8.486334817                                                | 5.827358246                           |
| 8.82830332                                           | 432596.6821                           | 3.994358466                                                | 2.045005798                           |
| 13.23540757                                          | 645690.1513                           | 7.487566744                                                | 3.82461381                            |
| 14.67584901                                          | 913387.3991                           | 8.243868136                                                | 4.394723654                           |
| 10.29194386                                          | 1072180.707                           | 5.587449247                                                | 2.52539134                            |
| 13.22150099                                          | 368337.0026                           | 8.620653987                                                | 3.152316213                           |
| 8.900471321                                          | 238528.234                            | 4.815468327                                                | 2.995011806                           |
| 10.67630812                                          | 283963.3521                           | 6.589884323                                                | 3.227053046                           |
| 13.35414925                                          | 1960279.078                           | 7.841378983                                                | 4.0353899                             |
| 7.945391459                                          | 434043.5493                           | 4.354700647                                                | 2.313488722                           |
| 12.56738528                                          | 315270.3754                           | 8.007113271                                                | 4.177198887                           |
| 11.73519275                                          | 285675.0685                           | 6.974005061                                                | 3.337430716                           |
| 11.45176037                                          | 697388.749                            | 6.969032455                                                | 2.971572399                           |
| 12.28723056                                          | 432925.8352                           | 6.964363509                                                | 4.001272678                           |
| 15.22826387                                          | 1156363.097                           | 8.965864431                                                | 5.13501358                            |
| 14.11395601                                          | 1296101.975                           | 8.417631112                                                | 3.658699512                           |
| 11.19690167                                          | 766304.8128                           | 6.257817074                                                | 2.949423313                           |
| 12.87029979                                          | 131839.7099                           | 8.380171153                                                | 4.391053677                           |
| 10.50865298                                          | 497249.429                            | 6.002427664                                                | 4.327906132                           |
| 11.03975593                                          | 1407625.149                           | 5.85972115                                                 | 3.122099042                           |
| 10.1426315                                           | 478613.4172                           | 5.421694321                                                | 2.310272932                           |
| 12.91960613                                          | 1133072.703                           | 7.425817353                                                | 2.534808874                           |
| 12.99352347                                          | 871072.193                            | 7.26766936                                                 | 3.15615895                            |
| 13.77113002                                          | 1751040.113                           | 8.124948278                                                | 5.367922783                           |
| 10.33943388                                          | 751740.1095                           | 5.557966521                                                | 2.816029072                           |
| 11.41984199                                          | 1190666.012                           | 5.960282927                                                | 2.238063335                           |
| 9.333654678                                          | 1262859.471                           | 4.278486539                                                | 1.272457123                           |
| 11.40362179                                          | 319843.9963                           | 6.907643401                                                | 3.69666197                            |
| 12.8857614                                           | 2153348.051                           | 8.31573494                                                 | 2.084411263                           |
| 9.917283926                                          | 537809.3488                           | 5.525630378                                                | 2.171794057                           |
| 15.68051291                                          | 1563603.373                           | 10.64854034                                                | 1.624345541                           |
| 12.1154579                                           | 1070546.937                           | 7.315442196                                                | 3.941797256                           |
| 15.11196979                                          | 1124715.644                           | 9.013467421                                                | 3.702225685                           |
| 12.51284347                                          | 459342.8987                           | 7.147059803                                                | 5.99668479                            |
| 12.58312245                                          | 895216.8892                           | 7.442642209                                                | 3.670768261                           |
| 12.46805792                                          | 1534856.875                           | 7.087342829                                                | 3.222666979                           |
| 10.18132891                                          | 202041.8543                           | 5.800952251                                                | 3.884773016                           |
| 15.04900314                                          | 376844.3365                           | 9.001848322                                                | 5.349025249                           |
| 10.89772636                                          | 349768.6817                           | 6.480522189                                                | 4.24118495                            |
| 14.04560782                                          | 1075535.174                           | 8.250785988                                                | 5.146748543                           |
| 15.26739736                                          | 1386097.57                            | 9.981319013                                                | 4.134631157                           |
| 13.10557204                                          | 1435097.402                           | 8.203338782                                                | 3.827631831                           |
| 10.62543175                                          | 261247.8307                           | 6.387551731                                                | 3.905232906                           |
| 12.49572635                                          | 471061.3237                           | 6.927892139                                                | 4.163564205                           |
| 10.9613007                                           | 481585.969                            | 6.44818837                                                 | 3.469530821                           |
| 13.22822573                                          | 1359396.349                           | 8.1602455                                                  | 4.447813034                           |
| 10.88296591                                          | 883171.8417                           | 6.107376756                                                | 2.029376745                           |
| 12.41875051                                          | 526048.7655                           | 7.216092338                                                | 3.438904524                           |
| 13.86360718                                          | 3345492.448                           | 8.512324854                                                | 1.219269156                           |
| 10.81371335                                          | 512895.3851                           | 5.546509298                                                | 3.029772878                           |
| 13.46898978                                          | 1065222.553                           | 7.664521798                                                | 4.191136837                           |
| 13.2326316                                           | 2185120.663                           | 7.579721794                                                | 3.798702478                           |
| 12.6256095                                           | 2580982.115                           | 7.24580738                                                 | 3.273042917                           |
| 8.912385753                                          | 120044.2903                           | 5.669461585                                                | 3.638978958                           |
| 10.93449204                                          | 1069898.187                           | 5.85322189                                                 | 2.646607161                           |
| 10.90298117                                          | 352231.7409                           | 5.799256508                                                | 2.301304102                           |
| 12.83612173                                          | 2110067.243                           | 7.460545646                                                | 2.952932835                           |
| 13.14045443                                          | 2085867.005                           | 7.827306897                                                | 4.079095364                           |
| 9.078916979                                          | 530256.6817                           | 5.226639873                                                | 2.605609179                           |
| 11.36459725                                          | 351673.5325                           | 6.532801758                                                | 3.044665337                           |
| 11.04625577                                          | 1325231.032                           | 5.677817038                                                | 3.54144001                            |
| 12.29184608                                          | 743159.8529                           | 6.897594939                                                | 3.36799407                            |
| 16.19624631                                          | 1047776.106                           | 10.32953533                                                | 3.53521657                            |
| 14.54448093                                          | 1159559.529                           | 9.459166005                                                | 2.838468552                           |
| 11.51674412                                          | 345202.1564                           | 6.920364596                                                | 3.453483105                           |
| 10.45592292                                          | 587462.6073                           | 5.987263431                                                | 3.488809109                           |
| 11.03701891                                          | 259048.3226                           | 6.157845764                                                | 3.66916573                            |
| 10.91005292                                          | 399875.3365                           | 6.681614717                                                | 3.509372711                           |
| 14.45689516                                          | 929256.9942                           | 8.906081452                                                | 2.597470999                           |
| 16.10186049                                          | 1004927.725                           | 9.691268096                                                | 3.187271357                           |
| 13.04944772                                          | 638203.2996                           | 7.354535898                                                | 2.921532631                           |
| 10.60156201                                          | 867988.5691                           | 5.622987007                                                | 2.204926252                           |
| 9.295798786                                          | 487372.5122                           | 5.972315547                                                | 2.949286461                           |
| 13.38125291                                          | 862302.6131                           | 7.970332038                                                | 3.091123343                           |
| 5.474426338                                          | 115436.8779                           | 2.928495587                                                | 1.834332883                           |
| 13.48951323                                          | 845449.132                            | 8.046663521                                                | 2.364152193                           |
| 12.0243422                                           | 870015.8429                           | 6.9515203                                                  | 4.675748587                           |
| 11.04142881                                          | 404217.8894                           | 6.262206603                                                | 3.898447156                           |
| 10.28623509                                          | 482517.8582                           | 5.721553232                                                | 3.504956722                           |
| 7.748225201                                          | 191836.9825                           | 4.121587681                                                | 2.353660583                           |
| 14.30112154                                          | 881315.7135                           | 9.381762313                                                | 4.450805426                           |
| 13.68847097                                          | 1826561.855                           | 8.441208472                                                | 3.433962345                           |
| 10.60902915                                          | 797901.2971                           | 6.073613216                                                | 3.796742678                           |
| 13.8191328                                           | 1432939.129                           | 9.141051915                                                | 3.166134953                           |
| 12.79597476                                          | 1391743.132                           | 6.612363746                                                | 3.120098829                           |
| 11.66824642                                          | 749300.8105                           | 7.012871119                                                | 2.889277697                           |
| 12.84532944                                          | 379049.6302                           | 6.944874768                                                | 2.493265867                           |
| 8.849947795                                          | 127950.2138                           | 5.216593172                                                | 2.210402489                           |
| 9.156565092                                          | 1185800.691                           | 4.812289555                                                | 2.614223719                           |





| log.sigma.0.5.mm.3D_firstorder_Kurtosis | log.sigma.0.5.mm.3D_firstorder_Mean | log.sigma.0.5.mm.3D_glrIm_ShortRunLowGrayLevelEmphasis | log.sigma.0.5.mm.3D_glrIm_GrayLevelVariance |
|-----------------------------------------|-------------------------------------|--------------------------------------------------------|---------------------------------------------|
| 4.734636859                             | 1.655260868                         | 0.022098559                                            | 1.106909559                                 |
| 6.682745951                             | 3.316125619                         | 0.075920021                                            | 0.524805206                                 |
| 5.975681784                             | 2.784855497                         | 0.071077295                                            | 0.501429807                                 |
| 5.932854983                             | 0.976897456                         | 0.051191491                                            | 0.815432194                                 |
| 5.068989639                             | 1.836069924                         | 0.045170608                                            | 0.690142228                                 |
| 5.813185812                             | 3.549084951                         | 0.051594802                                            | 1.040704391                                 |
| 5.263348091                             | 2.779711876                         | 0.041262476                                            | 0.624499605                                 |
| 6.759325938                             | 3.113424386                         | 0.044739427                                            | 0.744175849                                 |
| 5.45193194                              | 2.742345031                         | 0.045129595                                            | 0.733679934                                 |
| 5.410132017                             | 3.654251205                         | 0.04804472                                             | 0.816810141                                 |
| 5.063707848                             | 2.255888998                         | 0.076598524                                            | 0.490143724                                 |
| 6.410555601                             | 4.060999485                         | 0.030711502                                            | 1.012487758                                 |
| 11.01098206                             | 1.726584364                         | 0.044494405                                            | 0.634861365                                 |
| 6.008982429                             | 2.504668275                         | 0.029450113                                            | 0.867834361                                 |
| 5.714707613                             | 2.831837305                         | 0.030695822                                            | 1.018676077                                 |
| 7.870302683                             | 1.749633917                         | 0.041120363                                            | 0.623161928                                 |
| 4.034088909                             | 2.220479135                         | 0.078136417                                            | 0.663088397                                 |
| 8.860729197                             | 2.722412928                         | 0.041944162                                            | 0.538969529                                 |
| 5.303604338                             | 2.018872723                         | 0.041841632                                            | 0.557160182                                 |
| 6.4018042                               | 3.24490493                          | 0.048922042                                            | 0.84555239                                  |
| 6.121628659                             | 2.30337586                          | 0.065309921                                            | 0.41385796                                  |
| 4.401327431                             | 2.995649053                         | 0.083680058                                            | 0.659250058                                 |
| 6.250332247                             | 2.328935298                         | 0.044089275                                            | 0.665865575                                 |
| 5.531834803                             | 3.024738946                         | 0.042628947                                            | 0.636207261                                 |
| 6.496898967                             | 4.406838281                         | 0.045243542                                            | 0.766936923                                 |
| 5.063945681                             | 5.054676228                         | 0.028727196                                            | 1.016271851                                 |
| 4.801208277                             | 3.290095247                         | 0.046690478                                            | 0.881351776                                 |
| 7.289816643                             | 1.955221421                         | 0.045897548                                            | 0.688033405                                 |
| 3.740808814                             | 3.136027538                         | 0.078618827                                            | 0.633150303                                 |
| 7.388547428                             | 2.812299686                         | 0.044350057                                            | 0.595816739                                 |
| 7.877508164                             | 2.933620116                         | 0.027863426                                            | 0.739671895                                 |
| 7.086639565                             | 0.847860096                         | 0.044174441                                            | 0.585172111                                 |
| 5.880472891                             | 2.157443644                         | 0.044918292                                            | 0.820044065                                 |
| 6.203483157                             | 2.645068147                         | 0.049855306                                            | 0.866581562                                 |
| 4.92310626                              | 4.785659168                         | 0.044479935                                            | 0.844420274                                 |
| 7.249544813                             | 2.572844998                         | 0.042443131                                            | 0.636009067                                 |
| 9.315323332                             | 1.418608566                         | 0.020059829                                            | 0.797982344                                 |
| 9.994440141                             | 1.645554629                         | 0.027376434                                            | 0.65657042                                  |
| 7.719887353                             | 1.310264077                         | 0.04632335                                             | 0.628501651                                 |
| 3.950485247                             | 1.72665774                          | 0.080675799                                            | 0.667341967                                 |
| 5.472626221                             | 1.032057864                         | 0.078211845                                            | 0.551147879                                 |
| 3.286330493                             | 1.553989375                         | 0.086910718                                            | 0.850563917                                 |
| 5.441999909                             | 2.685663066                         | 0.044200172                                            | 0.668780251                                 |
| 5.219317483                             | 1.997672821                         | 0.054213173                                            | 0.967948695                                 |
| 7.814264045                             | 4.652874146                         | 0.029069407                                            | 0.833568414                                 |
| 5.102921236                             | 3.499587615                         | 0.080851466                                            | 0.737439952                                 |
| 5.937088003                             | 2.858498092                         | 0.044904373                                            | 0.790820877                                 |
| 6.97925537                              | 2.823479051                         | 0.083025816                                            | 0.601953218                                 |
| 4.383962916                             | 3.425628542                         | 0.095679153                                            | 0.922025457                                 |
| 6.536048372                             | 4.22150327                          | 0.040805204                                            | 0.599225144                                 |
| 5.779370064                             | 4.311574246                         | 0.048280703                                            | 0.914349943                                 |
| 4.036199576                             | 2.783521503                         | 0.046601126                                            | 0.867894765                                 |
| 4.272308383                             | 2.454280335                         | 0.044749503                                            | 0.716003617                                 |
| 5.875411952                             | 3.559649383                         | 0.074251783                                            | 0.581227759                                 |
| 6.216069591                             | 3.84159729                          | 0.046260718                                            | 0.816953244                                 |
| 6.103119074                             | 2.235959868                         | 0.082904516                                            | 0.601834226                                 |
| 4.691538211                             | 3.141473206                         | 0.044212757                                            | 0.749482767                                 |
| 6.747312083                             | 0.97774481                          | 0.044695484                                            | 0.640038154                                 |
| 6.137324049                             | 1.929124945                         | 0.046956598                                            | 0.74600995                                  |
| 4.605159351                             | 1.230883243                         | 0.047670836                                            | 0.823020139                                 |
| 7.325564218                             | 2.918451392                         | 0.044511062                                            | 0.728999133                                 |
| 7.253843337                             | 3.148374665                         | 0.030736488                                            | 0.902882359                                 |
| 5.465275411                             | 3.896226182                         | 0.028276736                                            | 0.841516139                                 |
| 6.43618931                              | 2.021439264                         | 0.047935601                                            | 0.803479756                                 |
| 4.947890739                             | 2.717655697                         | 0.06909907                                             | 0.403301421                                 |
| 7.439021543                             | 1.752705042                         | 0.046220642                                            | 0.694784036                                 |
| 7.135476997                             | 0.764217709                         | 0.048404761                                            | 0.698841448                                 |
| 5.565787354                             | 1.720142041                         | 0.028853051                                            | 0.783374984                                 |
| 6.492164776                             | 2.939276638                         | 0.029419537                                            | 0.788934539                                 |
| 7.719748684                             | 2.21608756                          | 0.040693987                                            | 0.484991829                                 |
| 5.728043948                             | 1.822955693                         | 0.086734458                                            | 0.649379157                                 |
| 7.893141268                             | 3.626400429                         | 0.046011791                                            | 0.752427633                                 |
| 5.401481447                             | 2.870632096                         | 0.044224608                                            | 0.767049339                                 |
| 3.986634151                             | 1.123560047                         | 0.050155001                                            | 0.970819786                                 |
| 3.772773055                             | 1.908750862                         | 0.089175983                                            | 0.805444066                                 |
| 5.130491634                             | 1.687691308                         | 0.084393244                                            | 0.607849987                                 |
| 7.256546262                             | 3.200673136                         | 0.040360615                                            | 0.584472076                                 |
| 7.361185256                             | 2.042020504                         | 0.047557065                                            | 0.674422034                                 |
| 5.987413361                             | 2.227791421                         | 0.042716661                                            | 0.573775384                                 |
| 4.851008009                             | 1.247723753                         | 0.048707356                                            | 0.879762343                                 |
| 5.021102905                             | 1.978380867                         | 0.022092616                                            | 1.076501489                                 |
| 5.557052017                             | 1.012910174                         | 0.049572015                                            | 0.840300637                                 |
| 7.47283256                              | 2.013081262                         | 0.045966091                                            | 0.690903379                                 |
| 4.591865746                             | 2.019138797                         | 0.067203802                                            | 0.405906488                                 |
| 4.718822695                             | 1.921341315                         | 0.047128161                                            | 0.819410853                                 |
| 11.50505786                             | 1.317621244                         | 0.064827492                                            | 0.324149199                                 |
| 4.97704379                              | 0.806199676                         | 0.048549128                                            | 0.789149339                                 |
| 5.34292527                              | 4.609631004                         | 0.041715213                                            | 0.711881102                                 |
| 7.472761415                             | 2.985727633                         | 0.044583141                                            | 0.661793769                                 |
| 7.659143477                             | 2.418668977                         | 0.044361311                                            | 0.63203173                                  |
| 8.925062825                             | 2.921266619                         | 0.038384779                                            | 0.444295913                                 |
| 4.047479419                             | 3.990838986                         | 0.044895227                                            | 0.758683479                                 |
| 4.60521352                              | 1.820181435                         | 0.046262007                                            | 0.7899803                                   |
| 5.669217412                             | 3.138513017                         | 0.041467384                                            | 0.601795753                                 |
| 4.202272745                             | 1.681911986                         | 0.044942208                                            | 0.728699332                                 |
| 7.899487262                             | 3.022908412                         | 0.020219512                                            | 0.930165454                                 |
| 4.925825521                             | 1.769822509                         | 0.081042486                                            | 0.621750872                                 |
| 6.435246823                             | 0.648298458                         | 0.052699585                                            | 0.845275892                                 |
| 5.049145968                             | 0.875713537                         | 0.072714263                                            | 0.430217359                                 |
| 7.447331408                             | 2.977621929                         | 0.040282507                                            | 0.545769772                                 |

| log.sigma.0.5.mm.3D_glrIm_LowGrayLevelRunEmphasis | log.sigma.0.5.mm.3D_glrIm_GrayLevelNonUniformityNormalized | log.sigma.0.5.mm.3D_glrIm_RunVariance | log.sigma.0.5.mm.3D_glrIm_GrayLevelNonUniformity |
|---------------------------------------------------|------------------------------------------------------------|---------------------------------------|--------------------------------------------------|
| 0.026493433                                       | 0.284621012                                                | 0.471768875                           | 456.5862973                                      |
| 0.094936596                                       | 0.408550191                                                | 0.730387921                           | 261.3570729                                      |
| 0.091379528                                       | 0.406251937                                                | 0.850213628                           | 418.2115233                                      |
| 0.063130042                                       | 0.340845868                                                | 0.681764706                           | 232.1283574                                      |
| 0.056685257                                       | 0.361502854                                                | 0.764256679                           | 584.7844147                                      |
| 0.061348311                                       | 0.311521288                                                | 0.456474386                           | 154.2137408                                      |
| 0.052726777                                       | 0.368910769                                                | 0.69929306                            | 1442.608624                                      |
| 0.056296                                          | 0.361746188                                                | 0.801734467                           | 1246.893598                                      |
| 0.056342289                                       | 0.352824147                                                | 0.732623511                           | 1112.901524                                      |
| 0.058117268                                       | 0.337402975                                                | 0.555142363                           | 262.2132241                                      |
| 0.096879918                                       | 0.41405684                                                 | 0.700813809                           | 426.3605412                                      |
| 0.03738693                                        | 0.31965477                                                 | 0.620100649                           | 531.4900446                                      |
| 0.057241523                                       | 0.397732574                                                | 0.755854304                           | 495.7520604                                      |
| 0.036951787                                       | 0.337281113                                                | 0.677917722                           | 404.4205306                                      |
| 0.037573801                                       | 0.311937748                                                | 0.595055387                           | 446.328225                                       |
| 0.056403478                                       | 0.385831377                                                | 0.789614784                           | 1137.795793                                      |
| 0.096874868                                       | 0.350580448                                                | 0.559297832                           | 301.4110739                                      |
| 0.054717032                                       | 0.415520645                                                | 0.786542104                           | 336.5806531                                      |
| 0.053844221                                       | 0.390179938                                                | 0.641682635                           | 349.942351                                       |
| 0.059655145                                       | 0.337658686                                                | 0.638562286                           | 1244.849957                                      |
| 0.087299881                                       | 0.434945051                                                | 0.900286571                           | 855.1698396                                      |
| 0.101252969                                       | 0.357586105                                                | 0.573407194                           | 277.1904663                                      |
| 0.055295422                                       | 0.363805655                                                | 0.666848297                           | 260.4239512                                      |
| 0.053788633                                       | 0.368068917                                                | 0.623753184                           | 689.9806756                                      |
| 0.056105883                                       | 0.348622907                                                | 0.638848283                           | 313.0882241                                      |
| 0.035276283                                       | 0.307491937                                                | 0.624466785                           | 528.4079024                                      |
| 0.057361719                                       | 0.318641225                                                | 0.660979415                           | 729.8888624                                      |
| 0.057800218                                       | 0.36985991                                                 | 0.737577013                           | 697.7458658                                      |
| 0.095204841                                       | 0.362339176                                                | 0.484267036                           | 119.2382921                                      |
| 0.056139928                                       | 0.403655618                                                | 0.805667753                           | 559.7696421                                      |
| 0.035810439                                       | 0.366702893                                                | 0.836016198                           | 1172.433497                                      |
| 0.057082162                                       | 0.39599856                                                 | 0.773825789                           | 546.9186021                                      |
| 0.056719676                                       | 0.33528818                                                 | 0.737934428                           | 748.6550461                                      |
| 0.060937715                                       | 0.334885474                                                | 0.683261506                           | 552.8591111                                      |
| 0.05467444                                        | 0.327833511                                                | 0.670038992                           | 1026.064556                                      |
| 0.054509908                                       | 0.379706956                                                | 0.70969715                            | 775.8371187                                      |
| 0.025776677                                       | 0.36449301                                                 | 0.710298127                           | 930.6166634                                      |
| 0.035894714                                       | 0.376823339                                                | 0.765887515                           | 1305.357699                                      |
| 0.058482014                                       | 0.387406259                                                | 0.702607592                           | 324.7973791                                      |
| 0.100320197                                       | 0.349923863                                                | 0.644900753                           | 1792.599864                                      |
| 0.099684128                                       | 0.389392684                                                | 0.776494366                           | 676.8252605                                      |
| 0.104418011                                       | 0.303966479                                                | 0.469715072                           | 882.0020835                                      |
| 0.055721017                                       | 0.365448636                                                | 0.750626368                           | 922.1296663                                      |
| 0.06448361                                        | 0.314358176                                                | 0.580466901                           | 568.9504152                                      |
| 0.036513238                                       | 0.357689166                                                | 0.724528494                           | 315.9323387                                      |
| 0.098718455                                       | 0.347644111                                                | 0.655966604                           | 678.3329732                                      |
| 0.055951802                                       | 0.346197674                                                | 0.695184382                           | 1107.106614                                      |
| 0.102669389                                       | 0.408412588                                                | 0.786053348                           | 238.3962462                                      |
| 0.11220085                                        | 0.315463179                                                | 0.513116361                           | 199.2029836                                      |
| 0.052193206                                       | 0.384562042                                                | 0.727580381                           | 356.6882286                                      |
| 0.058478575                                       | 0.325062068                                                | 0.611511939                           | 598.5227834                                      |
| 0.056504116                                       | 0.313742209                                                | 0.530431257                           | 781.0450873                                      |
| 0.055328974                                       | 0.34496671                                                 | 0.608943302                           | 1113.073668                                      |
| 0.09458255                                        | 0.394326675                                                | 0.765939917                           | 291.9297733                                      |
| 0.056943997                                       | 0.349535062                                                | 0.63218314                            | 329.2799183                                      |
| 0.103108487                                       | 0.384673356                                                | 0.669884658                           | 514.6769423                                      |
| 0.05492322                                        | 0.338922129                                                | 0.670454631                           | 969.4160549                                      |
| 0.057285098                                       | 0.377415309                                                | 0.712706687                           | 888.3223727                                      |
| 0.058302245                                       | 0.361139528                                                | 0.650600807                           | 415.7627797                                      |
| 0.05830979                                        | 0.323901288                                                | 0.57143539                            | 2161.217592                                      |
| 0.055892053                                       | 0.370430026                                                | 0.720181267                           | 448.612998                                       |
| 0.037784513                                       | 0.330826047                                                | 0.646830426                           | 627.0182389                                      |
| 0.035092247                                       | 0.328347352                                                | 0.633688791                           | 1355.903691                                      |
| 0.059418614                                       | 0.347618679                                                | 0.717579796                           | 1834.782553                                      |
| 0.08989285                                        | 0.445433113                                                | 0.749102564                           | 235.4946794                                      |
| 0.058488779                                       | 0.373169136                                                | 0.706954066                           | 980.3091559                                      |
| 0.060367497                                       | 0.37698994                                                 | 0.699193496                           | 336.0973614                                      |
| 0.036292953                                       | 0.342437376                                                | 0.663143746                           | 1504.20947                                       |
| 0.0360219                                         | 0.34800517                                                 | 0.662064179                           | 1470.78415                                       |
| 0.053480111                                       | 0.421809724                                                | 0.760186296                           | 816.0748348                                      |
| 0.106707976                                       | 0.370641424                                                | 0.671212824                           | 331.6725541                                      |
| 0.057726784                                       | 0.363009644                                                | 0.822702798                           | 1048.784096                                      |
| 0.055603077                                       | 0.346111715                                                | 0.7011023                             | 547.3745339                                      |
| 0.06028308                                        | 0.295693105                                                | 0.530932678                           | 494.6095191                                      |
| 0.106869235                                       | 0.318071765                                                | 0.530080151                           | 731.4951392                                      |
| 0.10404437                                        | 0.382594297                                                | 0.659940119                           | 358.2016732                                      |
| 0.052151397                                       | 0.399037953                                                | 0.723237873                           | 653.7305683                                      |
| 0.059083036                                       | 0.38643181                                                 | 0.680719357                           | 256.059189                                       |
| 0.054442432                                       | 0.389364538                                                | 0.654643414                           | 460.3098719                                      |
| 0.059649087                                       | 0.321920858                                                | 0.630763135                           | 537.7588807                                      |
| 0.026385595                                       | 0.292657793                                                | 0.463595755                           | 442.1211457                                      |
| 0.060808746                                       | 0.337718985                                                | 0.650183562                           | 429.0150457                                      |
| 0.057600758                                       | 0.369906984                                                | 0.719764929                           | 834.5715296                                      |
| 0.08990006                                        | 0.438609108                                                | 0.879989097                           | 870.5643096                                      |
| 0.058155311                                       | 0.330093841                                                | 0.646404557                           | 570.3362903                                      |
| 0.090042514                                       | 0.490225466                                                | 1.152016855                           | 451.8685275                                      |
| 0.059834686                                       | 0.335205449                                                | 0.644774597                           | 568.1388897                                      |
| 0.052481401                                       | 0.351660695                                                | 0.719221497                           | 669.5132831                                      |
| 0.056045281                                       | 0.392879556                                                | 0.707028393                           | 397.8101301                                      |
| 0.056637993                                       | 0.391421227                                                | 0.81338985                            | 526.097561                                       |
| 0.050898467                                       | 0.423492764                                                | 0.757449163                           | 367.4591683                                      |
| 0.054417749                                       | 0.330606902                                                | 0.536236291                           | 581.9905135                                      |
| 0.057165609                                       | 0.335601114                                                | 0.609664753                           | 1242.801997                                      |
| 0.053143243                                       | 0.379512071                                                | 0.750208842                           | 853.7852707                                      |
| 0.056134808                                       | 0.339975869                                                | 0.596243225                           | 1005.528119                                      |
| 0.025386316                                       | 0.332525297                                                | 0.671452937                           | 800.2625028                                      |
| 0.100589526                                       | 0.369637606                                                | 0.671581852                           | 727.7650312                                      |
| 0.064129315                                       | 0.342763032                                                | 0.644799077                           | 252.6673032                                      |
| 0.094463428                                       | 0.429686014                                                | 0.726302422                           | 238.8591759                                      |
| 0.052266896                                       | 0.39737224                                                 | 0.800486284                           | 1538.264263                                      |

| log.sigma.0.5.mm.3D_glrIm_LongRunEmphasis | log.sigma.0.5.mm.3D_glrIm_ShortRunHighGrayLevelEmphasis | log.sigma.0.5.mm.3D_glrIm_RunLengthNonUniformity | log.sigma.0.5.mm.3D_glrIm_ShortRunEmphasis |
|-------------------------------------------|---------------------------------------------------------|--------------------------------------------------|--------------------------------------------|
| 2.234392727                               | 35.1286586                                              | 984.2236956                                      | 0.810398939                                |
| 2.890430011                               | 9.793715996                                             | 333.3433196                                      | 0.744329112                                |
| 3.11877596                                | 9.662971299                                             | 521.6742301                                      | 0.731982017                                |
| 2.770121052                               | 15.51746407                                             | 367.2371957                                      | 0.758449145                                |
| 2.92897165                                | 15.52145351                                             | 855.6571695                                      | 0.75270735                                 |
| 2.253483128                               | 17.82052724                                             | 296.7752949                                      | 0.799375197                                |
| 2.805447688                               | 16.32554447                                             | 2084.192721                                      | 0.75577405                                 |
| 3.010072388                               | 16.03058085                                             | 1786.49437                                       | 0.745851697                                |
| 2.836079739                               | 16.12741125                                             | 1701.996159                                      | 0.760246767                                |
| 2.469921186                               | 16.86449433                                             | 444.1696452                                      | 0.782662708                                |
| 2.879190931                               | 9.368992678                                             | 531.9687953                                      | 0.74096742                                 |
| 2.559331097                               | 25.37373677                                             | 953.119168                                       | 0.784431798                                |
| 3.018339403                               | 15.34466556                                             | 621.8731903                                      | 0.729077682                                |
| 2.746449421                               | 23.97424914                                             | 650.5570472                                      | 0.762750962                                |
| 2.534389936                               | 24.82309587                                             | 815.7058528                                      | 0.782131292                                |
| 3.017460989                               | 15.50425321                                             | 1510.136346                                      | 0.739276556                                |
| 2.509240674                               | 10.35437208                                             | 484.4072399                                      | 0.775332894                                |
| 3.125185349                               | 15.05544278                                             | 393.5364113                                      | 0.718856866                                |
| 2.753587294                               | 15.67980374                                             | 468.5466399                                      | 0.746037627                                |
| 2.641874067                               | 16.9337567                                              | 2048.3658                                        | 0.772122912                                |
| 3.290326134                               | 9.361976229                                             | 951.1857503                                      | 0.716502638                                |
| 2.528889332                               | 10.29732266                                             | 435.9514326                                      | 0.775901485                                |
| 2.725665917                               | 16.23122001                                             | 388.6659269                                      | 0.762546019                                |
| 2.641830048                               | 16.66836131                                             | 1028.232086                                      | 0.765451015                                |
| 2.669438382                               | 16.87576647                                             | 491.1705919                                      | 0.763698671                                |
| 2.544935833                               | 26.37193626                                             | 1002.45378                                       | 0.790771695                                |
| 2.670850443                               | 17.03761453                                             | 1280.158426                                      | 0.774233711                                |
| 2.895017309                               | 15.74460179                                             | 990.2537981                                      | 0.750082261                                |
| 2.346253818                               | 10.7030204                                              | 191.4265011                                      | 0.78801619                                 |
| 3.034924847                               | 15.42159868                                             | 711.4710231                                      | 0.740019583                                |
| 3.071415081                               | 23.3950286                                              | 1646.374124                                      | 0.742594863                                |
| 3.034397351                               | 14.66496841                                             | 689.5804202                                      | 0.729494248                                |
| 2.856191                                  | 16.33115376                                             | 1198.240049                                      | 0.75725987                                 |
| 2.727670734                               | 16.51144475                                             | 904.4755057                                      | 0.766183164                                |
| 2.666501957                               | 17.46754557                                             | 1762.616614                                      | 0.77759863                                 |
| 2.879298836                               | 15.90258695                                             | 1055.474025                                      | 0.742890143                                |
| 2.853539956                               | 32.24133185                                             | 1344.42216                                       | 0.750930886                                |
| 3.001592792                               | 22.99048053                                             | 1753.840732                                      | 0.735255558                                |
| 2.880883294                               | 15.03902971                                             | 433.0553048                                      | 0.742372277                                |
| 2.674831759                               | 10.13102275                                             | 2806.28978                                       | 0.766125773                                |
| 3.031704328                               | 9.149592167                                             | 876.9698914                                      | 0.732649864                                |
| 2.261179547                               | 10.88074441                                             | 1748.083004                                      | 0.802673016                                |
| 2.88760463                                | 15.91214456                                             | 1342.823887                                      | 0.753441847                                |
| 2.482558985                               | 16.73135661                                             | 1051.023115                                      | 0.789332631                                |
| 2.838534245                               | 24.17724253                                             | 470.1669347                                      | 0.754747703                                |
| 2.65919535                                | 10.695386                                               | 1088.186937                                      | 0.772342983                                |
| 2.744955221                               | 16.60089754                                             | 1753.62352                                       | 0.767162103                                |
| 3.047586848                               | 9.456345608                                             | 295.4134064                                      | 0.734224872                                |
| 2.359585499                               | 10.93542888                                             | 372.8859638                                      | 0.793752202                                |
| 2.876071292                               | 16.45751257                                             | 486.2796573                                      | 0.748121893                                |
| 2.569355917                               | 17.45036574                                             | 1044.015049                                      | 0.780468616                                |
| 2.376663447                               | 17.35499337                                             | 1473.586689                                      | 0.796335766                                |
| 2.573823355                               | 16.51806414                                             | 1815.459242                                      | 0.777254761                                |
| 3.029814216                               | 9.880658037                                             | 373.6909078                                      | 0.732223458                                |
| 2.637844855                               | 16.9601629                                              | 519.5361513                                      | 0.768244709                                |
| 2.814264284                               | 9.684214435                                             | 694.8244068                                      | 0.744213833                                |
| 2.693295191                               | 16.690949                                               | 1589.2775                                        | 0.771593301                                |
| 2.886709616                               | 15.26035141                                             | 1210.262797                                      | 0.740684556                                |
| 2.718808819                               | 15.94482964                                             | 619.4718117                                      | 0.758799213                                |
| 2.455216835                               | 16.9307135                                              | 3896.469818                                      | 0.7914364                                  |
| 2.867079245                               | 16.18831166                                             | 638.0805773                                      | 0.751171152                                |
| 2.644077301                               | 24.67856059                                             | 1057.363783                                      | 0.773882301                                |
| 2.610287198                               | 25.23885707                                             | 2337.73944                                       | 0.780016094                                |
| 2.822662702                               | 16.10116441                                             | 2828.921496                                      | 0.757774048                                |
| 3.026421561                               | 9.186297927                                             | 263.6508718                                      | 0.724899181                                |
| 2.885451538                               | 15.56615496                                             | 1354.466751                                      | 0.742400943                                |
| 2.848171341                               | 15.18846145                                             | 466.259253                                       | 0.748791969                                |
| 2.702567107                               | 23.70979018                                             | 2407.528716                                      | 0.766712752                                |
| 2.599405827                               | 24.99317704                                             | 2458.574447                                      | 0.790059315                                |
| 3.021549424                               | 15.09849898                                             | 962.7320578                                      | 0.727380096                                |
| 2.809595402                               | 9.589660288                                             | 469.676173                                       | 0.747148719                                |
| 3.043548599                               | 16.2338621                                              | 1494.30677                                       | 0.744646754                                |
| 2.793367025                               | 16.30709144                                             | 850.2723287                                      | 0.759165882                                |
| 2.370609766                               | 17.04025636                                             | 996.9733959                                      | 0.798825421                                |
| 2.399075448                               | 10.57844901                                             | 1349.219495                                      | 0.792483763                                |
| 2.738784896                               | 9.610187495                                             | 501.0451186                                      | 0.755930807                                |
| 2.882311915                               | 16.16210403                                             | 854.2042746                                      | 0.746034147                                |
| 2.788566891                               | 15.71882803                                             | 351.018821                                       | 0.752970037                                |
| 2.763281045                               | 15.76106702                                             | 624.4045019                                      | 0.751013307                                |
| 2.604130213                               | 16.56457039                                             | 945.2536654                                      | 0.779641446                                |
| 2.210510063                               | 35.36822311                                             | 934.8726478                                      | 0.813580496                                |
| 2.678284908                               | 15.84998779                                             | 699.2916645                                      | 0.767422467                                |
| 2.842531924                               | 15.95619703                                             | 1199.38909                                       | 0.754475992                                |
| 3.309905195                               | 9.042394222                                             | 945.7009437                                      | 0.709224089                                |
| 2.667730134                               | 16.17701015                                             | 959.6751197                                      | 0.770972411                                |
| 4.048564304                               | 8.111413884                                             | 398.5822414                                      | 0.662821364                                |
| 2.664282789                               | 15.88147284                                             | 943.7454016                                      | 0.770990713                                |
| 2.807686513                               | 17.10239169                                             | 1034.313153                                      | 0.763633041                                |
| 2.827301038                               | 16.04683676                                             | 534.2443298                                      | 0.75060609                                 |
| 3.114708492                               | 15.24012602                                             | 673.5771165                                      | 0.730216847                                |
| 3.03121538                                | 15.6448032                                              | 432.0008982                                      | 0.727863434                                |
| 2.381808792                               | 17.68122622                                             | 1045.780038                                      | 0.797708892                                |
| 2.581321796                               | 16.39849517                                             | 2076.413641                                      | 0.775435872                                |
| 2.920904894                               | 16.08962751                                             | 1175.934684                                      | 0.74772334                                 |
| 2.579829019                               | 16.33695413                                             | 1730.23451                                       | 0.772581199                                |
| 2.707981333                               | 34.01765202                                             | 1328.132084                                      | 0.76925949                                 |
| 2.737890304                               | 9.891565731                                             | 1064.911947                                      | 0.760976872                                |
| 2.681636011                               | 15.77647105                                             | 399.5499155                                      | 0.761428236                                |
| 3.013764247                               | 8.795774619                                             | 274.8620932                                      | 0.721713984                                |
| 3.039668824                               | 15.85280018                                             | 1975.890664                                      | 0.738965725                                |

| log.sigma.0.5.mm.3D_glrIm_LongRunHighGrayLevelEmphasis | log.sigma.0.5.mm.3D_glrIm_RunPercentage | log.sigma.0.5.mm.3D_glrIm_LongRunLowGrayLevelEmphasis | log.sigma.0.5.mm.3D_glrIm_RunEntropy |
|--------------------------------------------------------|-----------------------------------------|-------------------------------------------------------|--------------------------------------|
| 100.161225                                             | 0.7555281626                            | 0.054506598                                           | 3.06426893                           |
| 41.68921053                                            | 0.68342246                              | 0.229339191                                           | 2.74629689                           |
| 44.51188597                                            | 0.670193561                             | 0.245208395                                           | 2.792281675                          |
| 61.09982573                                            | 0.696086922                             | 0.147044231                                           | 3.009349837                          |
| 66.46882269                                            | 0.682464917                             | 0.142620545                                           | 2.939084779                          |
| 50.72139532                                            | 0.7495338                               | 0.120234434                                           | 3.005263066                          |
| 63.2677543                                             | 0.691450118                             | 0.135106146                                           | 2.902579893                          |
| 69.71212621                                            | 0.674387085                             | 0.144052105                                           | 3.01238475                           |
| 64.43142887                                            | 0.692967613                             | 0.138564555                                           | 2.964060161                          |
| 56.09764908                                            | 0.724526406                             | 0.124276303                                           | 2.919080048                          |
| 39.95441234                                            | 0.682105693                             | 0.237236752                                           | 2.732898292                          |
| 86.34322776                                            | 0.720607375                             | 0.084263187                                           | 3.046103338                          |
| 67.9395612                                             | 0.667133616                             | 0.149047225                                           | 2.912428394                          |
| 91.10950602                                            | 0.697683796                             | 0.090367719                                           | 3.046599441                          |
| 84.37599001                                            | 0.720494727                             | 0.084401173                                           | 3.075535497                          |
| 67.97118344                                            | 0.673287864                             | 0.147755336                                           | 2.909699685                          |
| 33.99393138                                            | 0.71962376                              | 0.219605922                                           | 2.866880314                          |
| 71.57305946                                            | 0.656372824                             | 0.147871151                                           | 2.842349104                          |
| 61.37154352                                            | 0.690470546                             | 0.133919899                                           | 2.805827065                          |
| 60.08915812                                            | 0.708583012                             | 0.134395285                                           | 3.010841581                          |
| 46.58158617                                            | 0.6498779                               | 0.255617973                                           | 2.767678044                          |
| 35.79014959                                            | 0.717758608                             | 0.214871725                                           | 2.819352259                          |
| 61.30441384                                            | 0.698692909                             | 0.133890014                                           | 2.890054458                          |
| 59.08796518                                            | 0.70747726                              | 0.130015866                                           | 2.86044413                           |
| 61.53776199                                            | 0.705118134                             | 0.13063282                                            | 2.939081617                          |
| 86.04533988                                            | 0.724583563                             | 0.08237592                                            | 3.09565034                           |
| 60.93601681                                            | 0.708011135                             | 0.133612288                                           | 3.069055253                          |
| 65.00671902                                            | 0.68267142                              | 0.144258939                                           | 2.950941157                          |
| 33.01375388                                            | 0.735501635                             | 0.197035599                                           | 2.752800902                          |
| 69.63999926                                            | 0.673994457                             | 0.144961704                                           | 2.832023366                          |
| 103.1790736                                            | 0.671290458                             | 0.097694666                                           | 3.006551828                          |
| 67.59190704                                            | 0.66710042                              | 0.149654724                                           | 2.880485378                          |
| 63.67947035                                            | 0.690878338                             | 0.14360824                                            | 3.076841042                          |
| 62.14939187                                            | 0.701963993                             | 0.139617283                                           | 3.030148125                          |
| 62.24955199                                            | 0.709914064                             | 0.128113741                                           | 3.012797699                          |
| 65.09738129                                            | 0.680893631                             | 0.139754783                                           | 2.917082259                          |
| 127.9758201                                            | 0.685589068                             | 0.067410957                                           | 3.012989043                          |
| 97.5767187                                             | 0.670934375                             | 0.098747292                                           | 2.983018159                          |
| 63.98035976                                            | 0.680863039                             | 0.143952488                                           | 2.863991674                          |
| 35.95361704                                            | 0.704232356                             | 0.236819969                                           | 2.93130329                           |
| 41.96787362                                            | 0.669503588                             | 0.25391705                                            | 2.874695885                          |
| 30.10554658                                            | 0.749875674                             | 0.21327683                                            | 2.952723002                          |
| 65.52393483                                            | 0.689570216                             | 0.1404973                                             | 2.917792676                          |
| 55.67022651                                            | 0.726997279                             | 0.13340796                                            | 3.037495249                          |
| 96.16094949                                            | 0.690381606                             | 0.090853584                                           | 2.978707315                          |
| 38.08474271                                            | 0.710130307                             | 0.223077495                                           | 2.935824235                          |
| 62.31362937                                            | 0.700485617                             | 0.135149963                                           | 2.997482078                          |
| 44.12324404                                            | 0.668992317                             | 0.246376061                                           | 2.823048136                          |
| 34.35512118                                            | 0.740486306                             | 0.21407148                                            | 2.950849292                          |
| 66.70074153                                            | 0.6854802                               | 0.134311677                                           | 2.847203466                          |
| 59.41637513                                            | 0.716231997                             | 0.128848558                                           | 3.035972183                          |
| 52.93779742                                            | 0.73812838                              | 0.121601812                                           | 2.984138543                          |
| 57.63161211                                            | 0.714777687                             | 0.127527585                                           | 2.912234006                          |
| 43.47831373                                            | 0.669523411                             | 0.24186831                                            | 2.8693788                            |
| 60.7585816                                             | 0.707807981                             | 0.129960647                                           | 2.955169429                          |
| 39.47752511                                            | 0.68556213                              | 0.239386406                                           | 2.851956639                          |
| 61.33836666                                            | 0.706247029                             | 0.131229523                                           | 2.958914385                          |
| 63.5293733                                             | 0.680317658                             | 0.14551014                                            | 2.930238145                          |
| 61.01422477                                            | 0.697862211                             | 0.136265869                                           | 2.9347954                            |
| 52.4460103                                             | 0.730545936                             | 0.131540312                                           | 2.987655547                          |
| 65.97520128                                            | 0.685077097                             | 0.138382278                                           | 2.955350557                          |
| 88.32409527                                            | 0.709392106                             | 0.087611723                                           | 3.030337682                          |
| 87.91458606                                            | 0.712890495                             | 0.083592664                                           | 3.011990707                          |
| 63.48415302                                            | 0.691873783                             | 0.142692682                                           | 3.032128554                          |
| 42.56069166                                            | 0.66835443                              | 0.237766302                                           | 2.639296675                          |
| 64.80346283                                            | 0.679819145                             | 0.144544162                                           | 2.96630915                           |
| 63.12988245                                            | 0.683400189                             | 0.144944261                                           | 2.923229188                          |
| 88.47077972                                            | 0.702436923                             | 0.088960221                                           | 2.998375308                          |
| 86.36730529                                            | 0.720978185                             | 0.08466013                                            | 2.922646359                          |
| 67.55726498                                            | 0.66722408                              | 0.145267794                                           | 2.774620768                          |
| 39.56399705                                            | 0.688103275                             | 0.241355179                                           | 2.888287493                          |
| 70.73080211                                            | 0.672996235                             | 0.147352425                                           | 3.022958837                          |
| 63.39772588                                            | 0.693455294                             | 0.136928569                                           | 3.010885964                          |
| 52.48827442                                            | 0.739912146                             | 0.126055167                                           | 3.047665377                          |
| 32.77902713                                            | 0.734196497                             | 0.22070406                                            | 2.95568724                           |
| 38.18226844                                            | 0.69706523                              | 0.236303501                                           | 2.823398603                          |
| 65.38520853                                            | 0.683254142                             | 0.136857988                                           | 2.840777581                          |
| 62.75296176                                            | 0.69110326                              | 0.139584072                                           | 2.866034052                          |
| 61.76439007                                            | 0.691902122                             | 0.134961336                                           | 2.812028595                          |
| 57.00734696                                            | 0.71378301                              | 0.136837434                                           | 3.048446048                          |
| 99.29776439                                            | 0.759059442                             | 0.053755607                                           | 3.028071933                          |
| 59.43695258                                            | 0.705349126                             | 0.138536894                                           | 3.012198019                          |
| 63.65851055                                            | 0.689578088                             | 0.1420736                                             | 2.939724883                          |
| 45.88623079                                            | 0.645447946                             | 0.263898119                                           | 2.767500084                          |
| 59.50153544                                            | 0.70757246                              | 0.135423476                                           | 3.005885255                          |
| 58.25659445                                            | 0.600823459                             | 0.304978404                                           | 2.670684289                          |
| 58.40163906                                            | 0.709627479                             | 0.138487339                                           | 2.98746438                           |
| 65.51982711                                            | 0.693850642                             | 0.131978475                                           | 2.95008743                           |
| 64.54641085                                            | 0.690521227                             | 0.137196967                                           | 2.846467359                          |
| 71.58513232                                            | 0.66294397                              | 0.148968931                                           | 2.912120245                          |
| 68.99301496                                            | 0.665172251                             | 0.141712502                                           | 2.744308987                          |
| 53.94223332                                            | 0.738519667                             | 0.118001608                                           | 2.878807242                          |
| 57.28860786                                            | 0.714050372                             | 0.131053729                                           | 2.980487866                          |
| 66.79266728                                            | 0.681188811                             | 0.138887746                                           | 2.881219604                          |
| 56.29280805                                            | 0.712811086                             | 0.13190389                                            | 2.946676647                          |
| 124.8508668                                            | 0.702805377                             | 0.062656038                                           | 3.064760826                          |
| 37.70576777                                            | 0.698369788                             | 0.235390643                                           | 2.877591283                          |
| 59.88069922                                            | 0.70340166                              | 0.141524894                                           | 2.991339832                          |
| 41.79455847                                            | 0.665928795                             | 0.243672147                                           | 2.68714715                           |
| 69.59846348                                            | 0.670205963                             | 0.142723401                                           | 2.860625545                          |

| log.sigma.0.5.mm.3D_glrIm_HighGrayLevelRunEmphasis | log.sigma.0.5.mm.3D_glrIm_RunLengthNonUniformityNormalized | log.sigma.0.5.mm.3D_glszm_GrayLevelVariance |
|----------------------------------------------------|------------------------------------------------------------|---------------------------------------------|
| 43.68396637                                        | 0.612491394                                                | 3.897212313                                 |
| 13.50514182                                        | 0.520064439                                                | 2.274375                                    |
| 13.48306783                                        | 0.504170546                                                | 2.394557823                                 |
| 20.89928123                                        | 0.537531932                                                | 2.689586777                                 |
| 21.17449501                                        | 0.527772072                                                | 2.374023438                                 |
| 22.28051447                                        | 0.597379257                                                | 4.163580247                                 |
| 21.82672463                                        | 0.532119937                                                | 2.763668639                                 |
| 21.92708092                                        | 0.517875272                                                | 3.224359316                                 |
| 21.57132375                                        | 0.538269013                                                | 2.902080597                                 |
| 21.84639782                                        | 0.570668727                                                | 3.030311419                                 |
| 12.97350334                                        | 0.514668931                                                | 2.530276817                                 |
| 32.67411628                                        | 0.57261409                                                 | 3.646565083                                 |
| 21.45045025                                        | 0.498023378                                                | 3.497933884                                 |
| 31.86632887                                        | 0.541672136                                                | 3.725872576                                 |
| 32.11239924                                        | 0.569419512                                                | 3.470742932                                 |
| 21.36826688                                        | 0.510674525                                                | 2.967657068                                 |
| 13.38692546                                        | 0.56133727                                                 | 2.481229529                                 |
| 21.51330532                                        | 0.484866944                                                | 2.463137996                                 |
| 21.33152982                                        | 0.521343723                                                | 2.66830029                                  |
| 22.10201547                                        | 0.554812094                                                | 3.548238857                                 |
| 13.3314546                                         | 0.482381803                                                | 2.153187201                                 |
| 13.47431777                                        | 0.561283834                                                | 2.46875                                     |
| 21.56587343                                        | 0.542050678                                                | 2.726802643                                 |
| 21.89310826                                        | 0.546945746                                                | 2.848561851                                 |
| 22.32094109                                        | 0.545187837                                                | 3.110803324                                 |
| 33.39504682                                        | 0.582298515                                                | 3.538420661                                 |
| 22.18242776                                        | 0.557783973                                                | 3.553833395                                 |
| 21.35229148                                        | 0.524210758                                                | 3.036938776                                 |
| 13.69127125                                        | 0.58011654                                                 | 2.464285714                                 |
| 21.42858118                                        | 0.512191428                                                | 2.690402806                                 |
| 32.04017532                                        | 0.514184183                                                | 3.250810321                                 |
| 20.70225949                                        | 0.498573132                                                | 2.66617357                                  |
| 21.70005484                                        | 0.53488217                                                 | 3.564432133                                 |
| 21.84498189                                        | 0.546903162                                                | 3.347004563                                 |
| 22.63806769                                        | 0.562547724                                                | 3.208141771                                 |
| 21.70629337                                        | 0.515682287                                                | 3.073302928                                 |
| 43.42553996                                        | 0.525542082                                                | 3.99144499                                  |
| 31.56905901                                        | 0.505349248                                                | 3.77747499                                  |
| 20.80056482                                        | 0.515210649                                                | 2.815743945                                 |
| 13.25582174                                        | 0.546706937                                                | 2.704375                                    |
| 12.84475958                                        | 0.502944396                                                | 2.66387051                                  |
| 13.4631616                                         | 0.600963296                                                | 2.822937906                                 |
| 21.51487637                                        | 0.530183134                                                | 2.743047091                                 |
| 21.48248276                                        | 0.579928579                                                | 3.405624928                                 |
| 32.52305074                                        | 0.53163609                                                 | 3.712157556                                 |
| 13.93641946                                        | 0.556251995                                                | 3.065938847                                 |
| 21.8498305                                         | 0.547720991                                                | 3.362734784                                 |
| 13.33107756                                        | 0.504791334                                                | 2.821644713                                 |
| 13.94868197                                        | 0.589056691                                                | 3.086734694                                 |
| 22.29489276                                        | 0.523035271                                                | 2.468954573                                 |
| 22.52247261                                        | 0.566492508                                                | 3.588492766                                 |
| 21.88118315                                        | 0.590860266                                                | 3.070855441                                 |
| 21.51786539                                        | 0.562101272                                                | 2.801574372                                 |
| 13.70046388                                        | 0.502648132                                                | 2.608024691                                 |
| 22.30088041                                        | 0.550871889                                                | 3.029135802                                 |
| 13.27000817                                        | 0.51813813                                                 | 2.672382562                                 |
| 21.89522312                                        | 0.554488483                                                | 2.780937249                                 |
| 20.9636576                                         | 0.513212618                                                | 3.29                                        |
| 21.37857885                                        | 0.537115339                                                | 3.077708333                                 |
| 21.37437665                                        | 0.583038079                                                | 3.429841661                                 |
| 21.9419445                                         | 0.525893607                                                | 3.428419598                                 |
| 32.25883757                                        | 0.557276206                                                | 3.915004591                                 |
| 32.6587899                                         | 0.565557939                                                | 3.2559078                                   |
| 21.55084884                                        | 0.534845558                                                | 3.51689964                                  |
| 13.0943972                                         | 0.496034047                                                | 1.933402706                                 |
| 21.34740779                                        | 0.514549328                                                | 3.285727812                                 |
| 20.79746968                                        | 0.522497936                                                | 3.288337925                                 |
| 31.37927656                                        | 0.547129152                                                | 2.907302085                                 |
| 31.98414285                                        | 0.580842461                                                | 2.664558624                                 |
| 21.20262569                                        | 0.496662011                                                | 2.499946859                                 |
| 13.15971726                                        | 0.522808779                                                | 2.536422366                                 |
| 22.15383871                                        | 0.516597797                                                | 3.336242809                                 |
| 21.75803734                                        | 0.536853308                                                | 3.223725286                                 |
| 21.48128382                                        | 0.594767163                                                | 3.289845786                                 |
| 13.39573733                                        | 0.585108596                                                | 2.734603175                                 |
| 13.02173017                                        | 0.533866022                                                | 2.738754325                                 |
| 21.90235841                                        | 0.520179563                                                | 2.78125                                     |
| 21.30877031                                        | 0.52906286                                                 | 3.378698225                                 |
| 21.3460945                                         | 0.52679049                                                 | 2.399518141                                 |
| 21.38233903                                        | 0.565161868                                                | 3.208029821                                 |
| 43.81094205                                        | 0.617629006                                                | 3.714678069                                 |
| 21.03708452                                        | 0.549075741                                                | 3.319015268                                 |
| 21.46564073                                        | 0.530434621                                                | 3.410585938                                 |
| 13.05692296                                        | 0.474371485                                                | 2.188923575                                 |
| 21.30301447                                        | 0.553706317                                                | 2.911435465                                 |
| 12.92658436                                        | 0.427635044                                                | 0.785123967                                 |
| 20.91479719                                        | 0.554278928                                                | 3.125925159                                 |
| 22.60126001                                        | 0.542480499                                                | 2.771186855                                 |
| 21.76401593                                        | 0.526687903                                                | 2.993905817                                 |
| 21.463089                                          | 0.499422501                                                | 2.964677641                                 |
| 21.83885923                                        | 0.496836811                                                | 1.733398438                                 |
| 22.26318741                                        | 0.592994962                                                | 2.936175888                                 |
| 21.38402792                                        | 0.559831784                                                | 3.203114727                                 |
| 21.85059191                                        | 0.521631387                                                | 2.414653189                                 |
| 21.29566054                                        | 0.555963548                                                | 2.794681057                                 |
| 44.66918843                                        | 0.550879118                                                | 3.927512894                                 |
| 13.16489009                                        | 0.539769135                                                | 2.714177495                                 |
| 21.15719237                                        | 0.541285148                                                | 3.329369798                                 |
| 12.67446982                                        | 0.492087542                                                | 2.164930556                                 |
| 21.82254356                                        | 0.50945556                                                 | 2.394735069                                 |



| log.sigma.0.5.mm.3D_glszm_SmallAreaHighGrayLevelEmphasis | log.sigma.0.5.mm.3D_glszm_GrayLevelNonUniformityNormalized | log.sigma.0.5.mm.3D_glszm_SizeZoneNonUniformityNormalized |
|----------------------------------------------------------|------------------------------------------------------------|-----------------------------------------------------------|
| 26.8164105                                               | 0.220306513                                                | 0.4115471                                                 |
| 8.059475609                                              | 0.27                                                       | 0.47875                                                   |
| 6.917544441                                              | 0.310657596                                                | 0.332829428                                               |
| 11.00710637                                              | 0.257520661                                                | 0.292561983                                               |
| 11.75792525                                              | 0.303955078                                                | 0.4296875                                                 |
| 12.66351433                                              | 0.211248285                                                | 0.302469136                                               |
| 13.79745754                                              | 0.320473373                                                | 0.374585799                                               |
| 11.62071946                                              | 0.248548138                                                | 0.378576376                                               |
| 11.89378379                                              | 0.295505723                                                | 0.360034716                                               |
| 12.40356242                                              | 0.250103806                                                | 0.399861592                                               |
| 9.061743977                                              | 0.306228374                                                | 0.377595156                                               |
| 16.84607034                                              | 0.20745093                                                 | 0.356404959                                               |
| 10.70596707                                              | 0.203397612                                                | 0.355371901                                               |
| 18.46691807                                              | 0.242548476                                                | 0.374626039                                               |
| 17.8579983                                               | 0.245397765                                                | 0.371055227                                               |
| 12.0126472                                               | 0.235265521                                                | 0.418799508                                               |
| 11.42452955                                              | 0.294532628                                                | 0.389770723                                               |
| 9.460913932                                              | 0.280718336                                                | 0.427221172                                               |
| 14.44571592                                              | 0.345956783                                                | 0.438627757                                               |
| 12.96875552                                              | 0.243828998                                                | 0.416249431                                               |
| 8.117745497                                              | 0.310657596                                                | 0.314184933                                               |
| 6.463349801                                              | 0.346679688                                                | 0.315429688                                               |
| 12.82325425                                              | 0.295604711                                                | 0.354208561                                               |
| 13.27756672                                              | 0.257893599                                                | 0.414900519                                               |
| 12.29122452                                              | 0.246191136                                                | 0.336565097                                               |
| 20.90047402                                              | 0.189658837                                                | 0.377245191                                               |
| 12.66476264                                              | 0.227086848                                                | 0.364923218                                               |
| 12.03478375                                              | 0.262857143                                                | 0.332959184                                               |
| 7.98782791                                               | 0.323979592                                                | 0.303571429                                               |
| 11.79997386                                              | 0.311085131                                                | 0.484110958                                               |
| 16.89340067                                              | 0.239909461                                                | 0.421892259                                               |
| 12.07717561                                              | 0.319526627                                                | 0.392504931                                               |
| 14.77718526                                              | 0.243933518                                                | 0.359612188                                               |
| 12.91552349                                              | 0.212854592                                                | 0.38176949                                                |
| 13.64981679                                              | 0.253049353                                                | 0.38794802                                                |
| 11.99730567                                              | 0.255998414                                                | 0.373521052                                               |
| 24.82688771                                              | 0.197766012                                                | 0.439243285                                               |
| 15.9273155                                               | 0.213596759                                                | 0.308257736                                               |
| 12.29762183                                              | 0.312283737                                                | 0.41133218                                                |
| 9.287506843                                              | 0.3266375                                                  | 0.36705                                                   |
| 9.190127864                                              | 0.315926276                                                | 0.356332703                                               |
| 9.990199274                                              | 0.264041742                                                | 0.332708552                                               |
| 11.69736243                                              | 0.261218837                                                | 0.339445983                                               |
| 13.16621851                                              | 0.232281189                                                | 0.376517516                                               |
| 18.70308212                                              | 0.242772377                                                | 0.427092539                                               |
| 10.3154967                                               | 0.228353309                                                | 0.419010324                                               |
| 14.79893982                                              | 0.236319769                                                | 0.367279664                                               |
| 10.01311218                                              | 0.263082948                                                | 0.428266287                                               |
| 8.002995562                                              | 0.229387755                                                | 0.305306122                                               |
| 12.6100013                                               | 0.302122595                                                | 0.427097798                                               |
| 12.46315112                                              | 0.242607504                                                | 0.351598784                                               |
| 15.1260458                                               | 0.271176394                                                | 0.382295537                                               |
| 13.64287767                                              | 0.320830455                                                | 0.407056002                                               |
| 5.717815981                                              | 0.27914952                                                 | 0.344993141                                               |
| 12.20424556                                              | 0.249382716                                                | 0.371604938                                               |
| 7.091996712                                              | 0.35032001                                                 | 0.304673349                                               |
| 10.73179604                                              | 0.298013003                                                | 0.31214844                                                |
| 13.92113939                                              | 0.286933333                                                | 0.4448                                                    |
| 14.21580196                                              | 0.266388889                                                | 0.459583333                                               |
| 14.53231812                                              | 0.240586847                                                | 0.383263226                                               |
| 12.84318692                                              | 0.229036029                                                | 0.367201615                                               |
| 18.28093152                                              | 0.231955923                                                | 0.389237833                                               |
| 18.50772283                                              | 0.232889979                                                | 0.381618027                                               |
| 13.83457972                                              | 0.26630917                                                 | 0.442991311                                               |
| 8.86329438                                               | 0.329864724                                                | 0.448491155                                               |
| 12.1210385                                               | 0.249779068                                                | 0.388713546                                               |
| 11.74112456                                              | 0.272268136                                                | 0.389348026                                               |
| 16.95897921                                              | 0.269155267                                                | 0.352162072                                               |
| 19.67977868                                              | 0.207487551                                                | 0.374622001                                               |
| 9.514000248                                              | 0.322350941                                                | 0.353385057                                               |
| 7.076016572                                              | 0.294274894                                                | 0.308977501                                               |
| 12.42424846                                              | 0.240141947                                                | 0.42652472                                                |
| 12.80135052                                              | 0.249219563                                                | 0.378902185                                               |
| 12.9270844                                               | 0.230039728                                                | 0.339655688                                               |
| 8.638783994                                              | 0.294013605                                                | 0.34675737                                                |
| 7.43949655                                               | 0.334775087                                                | 0.366782007                                               |
| 14.86396061                                              | 0.274902344                                                | 0.364990234                                               |
| 12.54031749                                              | 0.24704142                                                 | 0.452662722                                               |
| 12.35828791                                              | 0.286848073                                                | 0.386621315                                               |
| 14.64613837                                              | 0.278342054                                                | 0.359597825                                               |
| 25.01127078                                              | 0.212758653                                                | 0.369495334                                               |
| 13.42275439                                              | 0.221710863                                                | 0.349989042                                               |
| 12.11176547                                              | 0.22421875                                                 | 0.345234375                                               |
| 9.175370093                                              | 0.378887733                                                | 0.465140479                                               |
| 11.10041225                                              | 0.254538982                                                | 0.293857047                                               |
| 3.633840885                                              | 0.495867769                                                | 0.446280992                                               |
| 13.02293409                                              | 0.244656074                                                | 0.356555044                                               |
| 13.66212322                                              | 0.258154433                                                | 0.383441733                                               |
| 15.0439595                                               | 0.250304709                                                | 0.486537396                                               |
| 13.46835628                                              | 0.274348422                                                | 0.470336077                                               |
| 7.164442951                                              | 0.37890625                                                 | 0.322265625                                               |
| 13.56389797                                              | 0.28494132                                                 | 0.434156379                                               |
| 14.43496756                                              | 0.27681213                                                 | 0.374486358                                               |
| 13.84155051                                              | 0.299556213                                                | 0.401216305                                               |
| 14.4145328                                               | 0.332091054                                                | 0.391124163                                               |
| 25.12948428                                              | 0.202408458                                                | 0.387663656                                               |
| 8.934294341                                              | 0.288736088                                                | 0.346891207                                               |
| 10.4132999                                               | 0.253269917                                                | 0.476813317                                               |
| 8.31041098                                               | 0.395833333                                                | 0.416666667                                               |
| 10.78942827                                              | 0.29157027                                                 | 0.416949305                                               |

| log.sigma.0.5.mm.3D_glszm_SizeZoneNonUniformity | log.sigma.0.5.mm.3D_glszm_GrayLevelNonUniformity | log.sigma.0.5.mm.3D_glszm_LargeAreaEmphasis | log.sigma.0.5.mm.3D_glszm_ZoneVariance |
|-------------------------------------------------|--------------------------------------------------|---------------------------------------------|----------------------------------------|
| 71.6091954                                      | 38.3333333                                       | 7687.977011                                 | 7539.249174                            |
| 19.15                                           | 10.8                                             | 10054.725                                   | 9508.334375                            |
| 20.96825397                                     | 19.57142857                                      | 16620.4127                                  | 16027.52885                            |
| 16.09090909                                     | 14.16363636                                      | 6318.890909                                 | 6003.344132                            |
| 55                                              | 38.90625                                         | 18033.57813                                 | 17691.32813                            |
| 16.33333333                                     | 11.40740741                                      | 2744.074074                                 | 2594.691358                            |
| 97.39230769                                     | 83.32307692                                      | 49846.35                                    | 49373.95649                            |
| 103.729927                                      | 68.10218978                                      | 40273.20438                                 | 39925.6677                             |
| 105.130137                                      | 86.28767123                                      | 28199.18493                                 | 27956.80695                            |
| 33.98823529                                     | 21.25882353                                      | 4965.529412                                 | 4806.472803                            |
| 25.67647059                                     | 20.82352941                                      | 14737.70588                                 | 14245.91003                            |
| 62.72727273                                     | 36.51136364                                      | 10822.38068                                 | 10650.85999                            |
| 23.45454545                                     | 13.42424242                                      | 23544.04545                                 | 22743.84137                            |
| 35.58947368                                     | 23.04210526                                      | 11975.8                                     | 11649.14194                            |
| 57.88461538                                     | 38.28205128                                      | 8420.75641                                  | 8259.010191                            |
| 78.31550802                                     | 43.99465241                                      | 43657.06952                                 | 43109.45946                            |
| 24.55555556                                     | 18.55555556                                      | 8416.253968                                 | 8057.061224                            |
| 19.65217391                                     | 12.91304348                                      | 15619.41304                                 | 14900.93998                            |
| 29.3880597                                      | 23.17910448                                      | 10817.97015                                 | 10442.65182                            |
| 140.6923077                                     | 82.41420118                                      | 30113.72485                                 | 29877.12949                            |
| 19.79365079                                     | 19.57142857                                      | 68970.60317                                 | 66666.60317                            |
| 20.1875                                         | 22.1875                                          | 7205.390625                                 | 6921.1521                              |
| 20.89830508                                     | 17.44067797                                      | 7157.966102                                 | 6856.737719                            |
| 56.42647059                                     | 35.07352941                                      | 20390.66912                                 | 20011.85159                            |
| 25.57894737                                     | 18.71052632                                      | 8323.118421                                 | 8042.555921                            |
| 73.18556701                                     | 36.79381443                                      | 9486.860825                                 | 9337.743995                            |
| 68.24064171                                     | 42.46524064                                      | 19574.65775                                 | 19275.75618                            |
| 46.61428571                                     | 36.8                                             | 22404.07143                                 | 22014.8549                             |
| 8.5                                             | 9.071428571                                      | 2815.821429                                 | 2560.96301                             |
| 46.95876289                                     | 30.17525773                                      | 20317.42268                                 | 19869.03114                            |
| 99.14468085                                     | 56.3787234                                       | 40656.05106                                 | 40246.11781                            |
| 30.61538462                                     | 24.92307692                                      | 24499.75641                                 | 23796.14678                            |
| 68.32631579                                     | 46.34736842                                      | 20226.05789                                 | 19937.23681                            |
| 54.21126761                                     | 30.22535211                                      | 14566.50704                                 | 14292.62785                            |
| 113.2808219                                     | 73.89041096                                      | 23894.17808                                 | 23666.70557                            |
| 45.94308943                                     | 31.48780488                                      | 30798.57724                                 | 30204.08976                            |
| 77.30681818                                     | 34.80681818                                      | 31644.85795                                 | 31197.87187                            |
| 51.47904192                                     | 35.67065868                                      | 65450.05389                                 | 64494.98483                            |
| 27.97058824                                     | 21.23529412                                      | 9695.588235                                 | 9368.403979                            |
| 146.82                                          | 130.655                                          | 49195.76                                    | 48865.42938                            |
| 32.7826087                                      | 29.06521739                                      | 31585.84783                                 | 30790.85302                            |
| 93.4911032                                      | 74.19572954                                      | 16004.48043                                 | 15815.09973                            |
| 64.49473684                                     | 49.63157895                                      | 28366.45789                                 | 27996.80668                            |
| 70.03225806                                     | 43.20430108                                      | 11612.69892                                 | 11433.77234                            |
| 38.01123596                                     | 21.60674157                                      | 7719.595506                                 | 7513.398813                            |
| 66.62264151                                     | 36.3081761                                       | 17963.45283                                 | 17665.40192                            |
| 98.06367041                                     | 63.09737828                                      | 30179.75281                                 | 29887.81655                            |
| 22.69811321                                     | 13.94339623                                      | 6805.528302                                 | 6535.453186                            |
| 21.37142857                                     | 16.05714286                                      | 3474.242857                                 | 3326.446735                            |
| 30.32394366                                     | 21.45070423                                      | 11217.29577                                 | 10854.68836                            |
| 60.8265896                                      | 41.97109827                                      | 13910.01734                                 | 13689.50342                            |
| 100.5437262                                     | 71.31939163                                      | 14276.01141                                 | 14111.72334                            |
| 112.7545126                                     | 88.8700361                                       | 27922.51264                                 | 27657.18735                            |
| 18.62962963                                     | 15.07407407                                      | 9899.555556                                 | 9481.580247                            |
| 33.44444444                                     | 22.44444444                                      | 7802.777778                                 | 7584.395062                            |
| 27.72527473                                     | 31.87912088                                      | 18067.01099                                 | 17607.82732                            |
| 73.04273504                                     | 69.73504274                                      | 24564.67094                                 | 24265.85392                            |
| 66.72                                           | 43.04                                            | 33250.37333                                 | 32718.91716                            |
| 55.15                                           | 31.96666667                                      | 9229.516667                                 | 9040.912222                            |
| 196.6140351                                     | 123.4210526                                      | 54558.35283                                 | 54241.67935                            |
| 35.6185567                                      | 22.21649485                                      | 13686.30928                                 | 13354.84409                            |
| 64.22424242                                     | 38.27272727                                      | 16020.65455                                 | 15758.80331                            |
| 134.3295455                                     | 81.97727273                                      | 34355.35511                                 | 34084.88345                            |
| 213.9648033                                     | 128.6273292                                      | 47193.81988                                 | 46944.72914                            |
| 13.90322581                                     | 10.22580645                                      | 9704.193548                                 | 9054.765869                            |
| 69.19101124                                     | 44.46067416                                      | 35240.7191                                  | 34769.97538                            |
| 25.6969697                                      | 17.96969697                                      | 10975.0303                                  | 10584.6685                             |
| 126.4261838                                     | 96.62674095                                      | 41164.08357                                 | 40860.99389                            |
| 176.0723404                                     | 97.51914894                                      | 24871.34681                                 | 24716.05279                            |
| 34.27835052                                     | 31.26804124                                      | 40110.06186                                 | 39217.46923                            |
| 20.70149254                                     | 19.71641791                                      | 10337.74627                                 | 9961.84941                             |
| 90.84976526                                     | 51.15023474                                      | 36129.53991                                 | 35723.88627                            |
| 46.98387097                                     | 30.90322581                                      | 16263.3629                                  | 15925.57408                            |
| 51.96732026                                     | 35.19607843                                      | 10340.83007                                 | 10122.83353                            |
| 72.81904762                                     | 61.74285714                                      | 15433.8619                                  | 15211.568                              |
| 24.94117647                                     | 22.76470588                                      | 11332.82353                                 | 10943.3417                             |
| 46.71875                                        | 35.1875                                          | 19506.95313                                 | 19156.56152                            |
| 23.53846154                                     | 12.84615385                                      | 7716.807692                                 | 7377.397929                            |
| 32.47619048                                     | 24.0952381                                       | 14648.32143                                 | 14235.36097                            |
| 61.49122807                                     | 47.59649123                                      | 11043.26901                                 | 10856.1714                             |
| 66.1396648                                      | 38.08379888                                      | 6479.73743                                  | 6356.266846                            |
| 40.94871795                                     | 25.94017094                                      | 10251.61538                                 | 10015.19191                            |
| 55.2375                                         | 35.875                                           | 27088.11875                                 | 26670.68277                            |
| 43.25806452                                     | 35.23655914                                      | 48305.19355                                 | 47213.35299                            |
| 46.72327044                                     | 40.47169811                                      | 13388.77358                                 | 13153.46956                            |
| 9.818181818                                     | 10.90909091                                      | 58293.81818                                 | 53444.59504                            |
| 49.56115108                                     | 34.00719424                                      | 14747.10072                                 | 14452.69437                            |
| 54.83216783                                     | 36.91608392                                      | 20592.68531                                 | 20225.01139                            |
| 46.22105263                                     | 23.77894737                                      | 10010.4                                     | 9772.915679                            |
| 50.7962963                                      | 29.62962963                                      | 17475.13889                                 | 17123.57639                            |
| 10.3125                                         | 12.125                                           | 24657                                       | 22996.4375                             |
| 70.33333333                                     | 46.16049383                                      | 12203.88889                                 | 11987.68999                            |
| 116.8397436                                     | 86.36538462                                      | 31765.75962                                 | 31489.79511                            |
| 62.58974359                                     | 46.73076923                                      | 29635.88462                                 | 29188.39941                            |
| 101.3011583                                     | 86.01158301                                      | 26851.15058                                 | 26568.80679                            |
| 80.24637681                                     | 41.89855072                                      | 21146.57971                                 | 20873.29249                            |
| 45.44274809                                     | 37.82442748                                      | 24212.31298                                 | 23749.89884                            |
| 27.65517241                                     | 14.68965517                                      | 7341.327586                                 | 7015.462842                            |
| 10                                              | 9.5                                              | 13730.08333                                 | 12522.52083                            |
| 87.97630332                                     | 61.52132701                                      | 69649.40284                                 | 68900.56351                            |

| log.sigma.0.5.mm.3D_glszm_ZonePercentage | log.sigma.0.5.mm.3D_glszm_LargeAreaLowGrayLevelEmphasis | log.sigma.0.5.mm.3D_glszm_LargeAreaHighGrayLevelEmphasis | log.sigma.0.5.mm.3D_glszm_HighGrayLevelZoneEmphasis |
|------------------------------------------|---------------------------------------------------------|----------------------------------------------------------|-----------------------------------------------------|
| 0.081998115                              | 172.8935773                                             | 348869.8161                                              | 41.71264368                                         |
| 0.042780749                              | 722.3019583                                             | 147561.525                                               | 11.425                                              |
| 0.0410691                                | 1207.550617                                             | 241704.8095                                              | 13.19047619                                         |
| 0.05629478                               | 286.3544115                                             | 144986.7091                                              | 18.98181818                                         |
| 0.054054054                              | 795.5741861                                             | 421398.0625                                              | 18.125                                              |
| 0.081818182                              | 128.1333975                                             | 61413.33333                                              | 23.42592593                                         |
| 0.046009556                              | 2283.721846                                             | 1130420.5                                                | 21.85384615                                         |
| 0.053641347                              | 1762.38567                                              | 946520.7007                                              | 19.57664234                                         |
| 0.064232292                              | 1263.795517                                             | 650787.0342                                              | 20.67465753                                         |
| 0.079291045                              | 221.4857382                                             | 115142.8471                                              | 20.08235294                                         |
| 0.045092838                              | 1098.15337                                              | 210384.5147                                              | 13.97058824                                         |
| 0.076355748                              | 323.2121633                                             | 369561.767                                               | 28.30681818                                         |
| 0.03535083                               | 1065.15143                                              | 539514.7879                                              | 19.86363636                                         |
| 0.055329062                              | 365.2905588                                             | 402155.2526                                              | 30.54736842                                         |
| 0.078629032                              | 250.4217655                                             | 288514.9103                                              | 29.76923077                                         |
| 0.04273309                               | 1995.802546                                             | 991895.2995                                              | 19.0625668                                          |
| 0.052763819                              | 663.9553351                                             | 115213.2381                                              | 16.87301587                                         |
| 0.03730738                               | 691.6911711                                             | 363878.6087                                              | 15.17391304                                         |
| 0.051617874                              | 500.5762513                                             | 243375.1642                                              | 21.40298507                                         |
| 0.065012502                              | 1366.92137                                              | 688114.7604                                              | 20.77810651                                         |
| 0.020833333                              | 5098.502037                                             | 990294.6984                                              | 14.12698413                                         |
| 0.05931418                               | 532.052995                                              | 103664.7656                                              | 13.03125                                            |
| 0.057617188                              | 326.825242                                              | 162888.3898                                              | 21.40677966                                         |
| 0.05137892                               | 947.3866403                                             | 457261.5809                                              | 21.47794118                                         |
| 0.059701493                              | 371.4182972                                             | 192887.0921                                              | 21.73684211                                         |
| 0.081891093                              | 284.7150836                                             | 322804.0464                                              | 33.95876289                                         |
| 0.057841015                              | 893.7683329                                             | 445499.8717                                              | 21.40106952                                         |
| 0.050687907                              | 1014.622237                                             | 512974.8071                                              | 20.55714286                                         |
| 0.062639821                              | 210.9453175                                             | 40139.92857                                              | 14.71428571                                         |
| 0.047224927                              | 891.0207649                                             | 476737.7113                                              | 17.87628866                                         |
| 0.0493905                                | 1222.736074                                             | 1379832.838                                              | 27.32340426                                         |
| 0.037699372                              | 1106.73253                                              | 562063.4744                                              | 17.75641026                                         |
| 0.058841747                              | 942.127696                                              | 452639.2632                                              | 24.14736842                                         |
| 0.060425532                              | 655.5987242                                             | 335285.1338                                              | 20.66901408                                         |
| 0.066303361                              | 1053.012767                                             | 558748.2466                                              | 21.9760274                                          |
| 0.041013671                              | 1396.90426                                              | 704279.3171                                              | 19.79674797                                         |
| 0.047299113                              | 713.0707883                                             | 1432393.318                                              | 37.11931818                                         |
| 0.03235807                               | 2054.2762                                               | 2144012.323                                              | 29.92814371                                         |
| 0.055284553                              | 443.9576122                                             | 220020.1324                                              | 18.11764706                                         |
| 0.055020633                              | 3961.033651                                             | 659734.9875                                              | 14.78                                               |
| 0.035466461                              | 2379.013889                                             | 447378.5652                                              | 13.51086957                                         |
| 0.072666149                              | 1336.647407                                             | 208279.669                                               | 16.02491103                                         |
| 0.052012045                              | 1267.484705                                             | 656226.9                                                 | 20.29473684                                         |
| 0.074758842                              | 529.5879658                                             | 264550.8065                                              | 20.14516129                                         |
| 0.069640063                              | 229.181563                                              | 264747.3483                                              | 30.07865169                                         |
| 0.057923497                              | 1345.26232                                              | 255699.9937                                              | 15.60377358                                         |
| 0.058526962                              | 1371.98044                                              | 688779.2734                                              | 23.09363296                                         |
| 0.060849598                              | 474.0724581                                             | 101941.1698                                              | 13.8490566                                          |
| 0.082256169                              | 242.2508392                                             | 52353.37143                                              | 14.35714286                                         |
| 0.052514793                              | 491.5253636                                             | 263464.8592                                              | 19.73239437                                         |
| 0.067341378                              | 620.7891827                                             | 322261.3815                                              | 21.68786127                                         |
| 0.078018392                              | 668.5787383                                             | 318103.3802                                              | 23.5095057                                          |
| 0.061391844                              | 1282.24194                                              | 632124.0722                                              | 21.13357401                                         |
| 0.048913043                              | 719.7015432                                             | 143939.2222                                              | 13.35185185                                         |
| 0.067669173                              | 347.1933016                                             | 181193.4111                                              | 21.04444444                                         |
| 0.046666667                              | 1335.659463                                             | 259489.0659                                              | 13.25274725                                         |
| 0.057849197                              | 1095.70738                                              | 569108.047                                               | 20.5                                                |
| 0.043377675                              | 1545.517477                                             | 745340.0933                                              | 20.1                                                |
| 0.072815534                              | 418.5395959                                             | 211084.475                                               | 20.50833333                                         |
| 0.056194545                              | 2691.59379                                              | 1161162.926                                              | 23.02729045                                         |
| 0.054926387                              | 607.7266666                                             | 318196.6495                                              | 21.55670103                                         |
| 0.061797753                              | 487.50583                                               | 538865.8667                                              | 29.03636364                                         |
| 0.060804975                              | 1045.078187                                             | 1155511.986                                              | 30.28409091                                         |
| 0.063360882                              | 2144.877468                                             | 1077183.501                                              | 20.76604555                                         |
| 0.039240506                              | 702.0136918                                             | 141560.9355                                              | 20.76604555                                         |
| 0.046090109                              | 1593.411094                                             | 807799.6854                                              | 12.5483871                                          |
| 0.050613497                              | 504.1536918                                             | 248492.0303                                              | 19.06179775                                         |
| 0.05744                                  | 1275.204328                                             | 1363578.292                                              | 18.33333333                                         |
| 0.08024586                               | 754.0737063                                             | 838655.117                                               | 28.18662953                                         |
| 0.03347136                               | 1827.855238                                             | 913459.0619                                              | 31.57234043                                         |
| 0.051578137                              | 764.4368201                                             | 148542.806                                               | 17.92783505                                         |
| 0.04965035                               | 1588.830187                                             | 846325.3192                                              | 11.71641791                                         |
| 0.054409829                              | 732.8709588                                             | 373940.629                                               | 19                                                  |
| 0.067729084                              | 479.4705489                                             | 232905.0065                                              | 21.35483871                                         |
| 0.067071223                              | 1221.091933                                             | 210313.5667                                              | 21.67320261                                         |
| 0.050670641                              | 836.869906                                              | 163139.5147                                              | 14.75238095                                         |
| 0.053422371                              | 874.6354553                                             | 449988.8359                                              | 13.20588235                                         |
| 0.054279749                              | 347.6072992                                             | 177470.0769                                              | 24.171875                                           |
| 0.049209139                              | 674.6429678                                             | 330848.2619                                              | 18.76923077                                         |
| 0.073108166                              | 523.6527145                                             | 243571.2924                                              | 20.05952381                                         |
| 0.08994972                               | 144.2181184                                             | 296665.2626                                              | 23.74853801                                         |
| 0.065036131                              | 467.1917811                                             | 612864.275                                               | 41.54748603                                         |
| 0.048944631                              | 1244.827018                                             | 233675.2137                                              | 20.29059829                                         |
| 0.030263586                              | 3636.035606                                             | 612864.275                                               | 20.58125                                            |
| 0.065190652                              | 608.6068163                                             | 684106.3011                                              | 13.08602151                                         |
| 0.014360313                              | 4142.561162                                             | 305741.4465                                              | 20.88050314                                         |
| 0.058280922                              | 683.8349089                                             | 860881.6818                                              | 5.545454545                                         |
| 0.052151714                              | 907.1601528                                             | 331464.5324                                              | 20.5971223                                          |
| 0.06489071                               | 440.6408197                                             | 481818.9161                                              | 22.11888112                                         |
| 0.053333333                              | 762.6456658                                             | 234257.4947                                              | 21.16842105                                         |
| 0.024539877                              | 1112.84898                                              | 411551.213                                               | 20.01851852                                         |
| 0.068010076                              | 567.5268881                                             | 566111.9688                                              | 16.03125                                            |
| 0.060196797                              | 1457.963813                                             | 273615.5432                                              | 21.66049383                                         |
| 0.047272727                              | 1305.878232                                             | 719480.7147                                              | 22.37179487                                         |
| 0.059512868                              | 1268.386138                                             | 692989.8654                                              | 22.26282051                                         |
| 0.060490941                              | 461.8499933                                             | 593802.7297                                              | 22.50965251                                         |
| 0.046503372                              | 1855.226283                                             | 983196.1739                                              | 39.86956522                                         |
| 0.055396371                              | 337.3986806                                             | 338414.458                                               | 14.30534351                                         |
| 0.028776978                              | 1024.7675                                               | 166515.6724                                              | 16.68965517                                         |
| 0.036543124                              | 3131.048175                                             | 195864.2083                                              | 12.45833333                                         |
|                                          |                                                         | 1603561.18                                               | 17.68246445                                         |

| log.sigma.0.5.mm.3D_glszm_SmallAreaEmphasis | log.sigma.0.5.mm.3D_glszm_LowGrayLevelZoneEmphasis | log.sigma.0.5.mm.3D_glszm_ZoneEntropy | log.sigma.0.5.mm.3D_glszm_SmallAreaLowGrayLevelEmphasis |
|---------------------------------------------|----------------------------------------------------|---------------------------------------|---------------------------------------------------------|
| 0.666208156                                 | 0.042193326                                        | 4.276393288                           | 0.031922748                                             |
| 0.713698426                                 | 0.253708333                                        | 3.45015896                            | 0.194745809                                             |
| 0.59313587                                  | 0.20739418                                         | 3.721515893                           | 0.15952521                                              |
| 0.551502796                                 | 0.12430035                                         | 4.082121315                           | 0.06726396                                              |
| 0.678726339                                 | 0.102560631                                        | 3.821508059                           | 0.074393176                                             |
| 0.555664754                                 | 0.136801724                                        | 4.15714804                            | 0.099819889                                             |
| 0.635625674                                 | 0.084668247                                        | 4.052163996                           | 0.057303874                                             |
| 0.638924073                                 | 0.125160701                                        | 4.218186311                           | 0.095829353                                             |
| 0.619772867                                 | 0.102873538                                        | 4.065357237                           | 0.074578049                                             |
| 0.654353949                                 | 0.117895025                                        | 3.853731881                           | 0.090597322                                             |
| 0.630348239                                 | 0.217144608                                        | 3.534207264                           | 0.156903673                                             |
| 0.613985821                                 | 0.071042811                                        | 4.352811573                           | 0.048304959                                             |
| 0.611129874                                 | 0.150813492                                        | 4.107974143                           | 0.111150616                                             |
| 0.634185361                                 | 0.068539981                                        | 4.081941926                           | 0.052298205                                             |
| 0.627938433                                 | 0.064251973                                        | 4.253837878                           | 0.04639455                                              |
| 0.671935448                                 | 0.125634663                                        | 4.161709868                           | 0.091531497                                             |
| 0.645092922                                 | 0.154598765                                        | 3.646298274                           | 0.1094465                                               |
| 0.672810645                                 | 0.149703737                                        | 3.311635739                           | 0.123474784                                             |
| 0.687410847                                 | 0.093032372                                        | 3.329072645                           | 0.071450996                                             |
| 0.67094989                                  | 0.143412602                                        | 4.2339996                             | 0.115273092                                             |
| 0.564486257                                 | 0.160189594                                        | 3.992399507                           | 0.099845844                                             |
| 0.576150961                                 | 0.231827257                                        | 3.69553081                            | 0.161393166                                             |
| 0.614605623                                 | 0.09693695                                         | 3.757927008                           | 0.069126404                                             |
| 0.669302049                                 | 0.102374783                                        | 3.957755735                           | 0.081017162                                             |
| 0.598666282                                 | 0.117172097                                        | 4.054726938                           | 0.088108738                                             |
| 0.637340812                                 | 0.053514028                                        | 4.530380101                           | 0.038415021                                             |
| 0.627184187                                 | 0.124032348                                        | 4.368981607                           | 0.094865691                                             |
| 0.591368142                                 | 0.118311144                                        | 4.17203026                            | 0.073381875                                             |
| 0.561882683                                 | 0.189017857                                        | 3.54952346                            | 0.13481353                                              |
| 0.720917448                                 | 0.132133273                                        | 3.46289523                            | 0.109152726                                             |
| 0.673595931                                 | 0.0692265                                          | 4.202019103                           | 0.053494977                                             |
| 0.647716471                                 | 0.114100456                                        | 3.594125343                           | 0.072012576                                             |
| 0.620125386                                 | 0.101628544                                        | 4.305444418                           | 0.074124493                                             |
| 0.64034418                                  | 0.134371407                                        | 4.484967871                           | 0.092961515                                             |
| 0.647112511                                 | 0.100346285                                        | 4.265513254                           | 0.074403354                                             |
| 0.628148378                                 | 0.114671295                                        | 4.111088832                           | 0.083962837                                             |
| 0.688372699                                 | 0.04936638                                         | 4.272237838                           | 0.038183019                                             |
| 0.574814859                                 | 0.076419111                                        | 4.657612349                           | 0.057034382                                             |
| 0.663309845                                 | 0.127726591                                        | 3.439120159                           | 0.092583354                                             |
| 0.629069428                                 | 0.201295139                                        | 4.012841432                           | 0.140818535                                             |
| 0.619328787                                 | 0.230872585                                        | 3.84063224                            | 0.159515662                                             |
| 0.596262256                                 | 0.188950642                                        | 4.268522879                           | 0.13416057                                              |
| 0.601983719                                 | 0.107183852                                        | 4.297985183                           | 0.077124363                                             |
| 0.635311941                                 | 0.136022968                                        | 4.198327709                           | 0.082751717                                             |
| 0.677448687                                 | 0.071228823                                        | 3.90920151                            | 0.057260483                                             |
| 0.672021113                                 | 0.214608175                                        | 4.080912081                           | 0.152932864                                             |
| 0.625720875                                 | 0.095247756                                        | 4.371366145                           | 0.059827246                                             |
| 0.678559121                                 | 0.244323899                                        | 3.540105591                           | 0.173287372                                             |
| 0.565829022                                 | 0.251700275                                        | 4.256519891                           | 0.169616256                                             |
| 0.674999522                                 | 0.098164862                                        | 3.585605525                           | 0.074013907                                             |
| 0.61422944                                  | 0.128019396                                        | 4.324334843                           | 0.094138184                                             |
| 0.641920947                                 | 0.090068668                                        | 4.213258877                           | 0.063288578                                             |
| 0.662937595                                 | 0.092848486                                        | 3.860616013                           | 0.067116299                                             |
| 0.606373667                                 | 0.242309671                                        | 3.552693794                           | 0.207197392                                             |
| 0.632062941                                 | 0.113750693                                        | 3.95890008                            | 0.079088842                                             |
| 0.562035207                                 | 0.249819902                                        | 3.800124585                           | 0.152784525                                             |
| 0.577184505                                 | 0.096683147                                        | 4.33152768                            | 0.064496086                                             |
| 0.692973761                                 | 0.124827324                                        | 3.76371249                            | 0.096373341                                             |
| 0.704039594                                 | 0.113356493                                        | 3.713419044                           | 0.086672494                                             |
| 0.643384294                                 | 0.112755461                                        | 4.420566755                           | 0.08519977                                              |
| 0.621927063                                 | 0.110751295                                        | 4.122053609                           | 0.074894276                                             |
| 0.648005772                                 | 0.08354653                                         | 4.303646916                           | 0.065123121                                             |
| 0.640693862                                 | 0.057436584                                        | 4.407700655                           | 0.041162249                                             |
| 0.691817901                                 | 0.132062248                                        | 4.047944968                           | 0.103697921                                             |
| 0.692065805                                 | 0.171227599                                        | 2.99436123                            | 0.126661065                                             |
| 0.647026782                                 | 0.139446212                                        | 4.129103837                           | 0.099400979                                             |
| 0.647206311                                 | 0.148524445                                        | 3.594464178                           | 0.11135859                                              |
| 0.614081678                                 | 0.05774294                                         | 4.31133579                            | 0.037860731                                             |
| 0.63602825                                  | 0.049951453                                        | 4.574028733                           | 0.032118427                                             |
| 0.615328288                                 | 0.109662085                                        | 3.710849091                           | 0.079415249                                             |
| 0.564066455                                 | 0.265281924                                        | 3.819873992                           | 0.148954827                                             |
| 0.677910561                                 | 0.145077449                                        | 4.137749562                           | 0.107107824                                             |
| 0.63916267                                  | 0.100805                                           | 4.100007349                           | 0.073984672                                             |
| 0.602481115                                 | 0.106563422                                        | 4.429551772                           | 0.068147703                                             |
| 0.608850299                                 | 0.207332631                                        | 4.219246844                           | 0.145331226                                             |
| 0.617910876                                 | 0.252504085                                        | 3.432637831                           | 0.184210944                                             |
| 0.62414968                                  | 0.07911785                                         | 3.990491632                           | 0.055169178                                             |
| 0.69705857                                  | 0.154991497                                        | 3.58788996                            | 0.130852752                                             |
| 0.640214812                                 | 0.095484356                                        | 3.770850991                           | 0.065731574                                             |
| 0.622079104                                 | 0.097128121                                        | 4.165603465                           | 0.063294494                                             |
| 0.629208382                                 | 0.041592148                                        | 4.411655702                           | 0.030531307                                             |
| 0.612742883                                 | 0.122824752                                        | 4.221008234                           | 0.084180984                                             |
| 0.608529935                                 | 0.137183718                                        | 4.364309422                           | 0.105054984                                             |
| 0.707743258                                 | 0.181965352                                        | 3.204429222                           | 0.139565452                                             |
| 0.555374412                                 | 0.100205722                                        | 4.408926338                           | 0.064475327                                             |
| 0.68970984                                  | 0.321578283                                        | 2.642423962                           | 0.233273384                                             |
| 0.619175315                                 | 0.118457244                                        | 4.285111752                           | 0.084004564                                             |
| 0.642446185                                 | 0.089401115                                        | 4.228348191                           | 0.063525316                                             |
| 0.72297406                                  | 0.109664757                                        | 3.582977183                           | 0.086646251                                             |
| 0.711951866                                 | 0.123875714                                        | 3.588213865                           | 0.10343943                                              |
| 0.572035178                                 | 0.111696783                                        | 3.177549678                           | 0.082529991                                             |
| 0.682352333                                 | 0.101181693                                        | 3.807123646                           | 0.082196883                                             |
| 0.635523358                                 | 0.098955926                                        | 4.216957617                           | 0.068996858                                             |
| 0.656445244                                 | 0.086160751                                        | 3.959512264                           | 0.063576341                                             |
| 0.650268197                                 | 0.089715661                                        | 3.912217427                           | 0.063213426                                             |
| 0.645520887                                 | 0.044155681                                        | 4.474063539                           | 0.032019924                                             |
| 0.610292967                                 | 0.216946565                                        | 4.103416277                           | 0.144334437                                             |
| 0.715449756                                 | 0.184771777                                        | 3.59105819                            | 0.147878126                                             |
| 0.662671044                                 | 0.188900463                                        | 2.855388542                           | 0.139070436                                             |
| 0.671008965                                 | 0.105580864                                        | 3.84642052                            | 0.080149923                                             |

| log.sigma.0.5.mm.3D_ngtdm_Coarseness | log.sigma.0.5.mm.3D_ngtdm_Complexity | log.sigma.0.5.mm.3D_ngtdm_Strength | log.sigma.0.5.mm.3D_ngtdm_Busyness | log.sigma.0.5.mm.3D_ngtdm_Contrast |
|--------------------------------------|--------------------------------------|------------------------------------|------------------------------------|------------------------------------|
| 0.002752067                          | 0.014164046                          | 0.110959663                        | 4.457800069                        | 9.47E-06                           |
| 0.005232716                          | 0.009174515                          | 0.078109513                        | 6.351158673                        | 1.69E-05                           |
| 0.003405053                          | 0.005268115                          | 0.050509832                        | 9.839404174                        | 9.24E-06                           |
| 0.005583603                          | 0.013647623                          | 0.112176768                        | 4.132265118                        | 2.09E-05                           |
| 0.002194278                          | 0.005487302                          | 0.048597482                        | 10.07365577                        | 6.76E-06                           |
| 0.008244213                          | 0.028216637                          | 0.209498303                        | 2.447901095                        | 3.31E-05                           |
| 0.000924823                          | 0.002998962                          | 0.027928886                        | 19.95466237                        | 1.90E-06                           |
| 0.001030928                          | 0.00330339                           | 0.030638286                        | 17.67208598                        | 2.43E-06                           |
| 0.001200501                          | 0.003810057                          | 0.033635934                        | 15.48900199                        | 2.84E-06                           |
| 0.00530732                           | 0.012498623                          | 0.103327219                        | 4.318506539                        | 1.91E-05                           |
| 0.003234337                          | 0.005595629                          | 0.049040792                        | 10.49869494                        | 9.85E-06                           |
| 0.002445568                          | 0.010789992                          | 0.089349364                        | 5.495365681                        | 6.79E-06                           |
| 0.002597125                          | 0.006660663                          | 0.063342508                        | 8.365589179                        | 7.54E-06                           |
| 0.003213891                          | 0.010931382                          | 0.104821899                        | 4.884556127                        | 9.36E-06                           |
| 0.002830992                          | 0.013632974                          | 0.110817915                        | 4.824818345                        | 8.31E-06                           |
| 0.001164763                          | 0.003760914                          | 0.036889844                        | 15.64042898                        | 2.35E-06                           |
| 0.004616344                          | 0.007600026                          | 0.057436325                        | 8.135575843                        | 1.93E-05                           |
| 0.003967946                          | 0.009666652                          | 0.102685379                        | 5.291895921                        | 8.91E-06                           |
| 0.003830506                          | 0.009824393                          | 0.090457271                        | 5.734813603                        | 9.75E-06                           |
| 0.001045877                          | 0.003406923                          | 0.028563771                        | 18.14864254                        | 3.00E-06                           |
| 0.001591344                          | 0.002712126                          | 0.025539438                        | 20.6363844                         | 3.94E-06                           |
| 0.004813814                          | 0.005804093                          | 0.043543801                        | 9.983368153                        | 3.20E-05                           |
| 0.004977848                          | 0.013079077                          | 0.109023558                        | 4.498586652                        | 1.58E-05                           |
| 0.002028076                          | 0.004875937                          | 0.044122047                        | 11.0916597                         | 5.66E-06                           |
| 0.004349759                          | 0.010218484                          | 0.090717982                        | 5.169938921                        | 1.43E-05                           |
| 0.00253631                           | 0.010088783                          | 0.090807507                        | 5.420723165                        | 6.47E-06                           |
| 0.001795648                          | 0.005624824                          | 0.04404543                         | 10.7944082                         | 5.23E-06                           |
| 0.001889731                          | 0.00460066                           | 0.041873659                        | 11.76533133                        | 5.73E-06                           |
| 0.011808958                          | 0.020703813                          | 0.150940248                        | 3.041836943                        | 4.95E-05                           |
| 0.002408738                          | 0.005966543                          | 0.059294977                        | 8.794282182                        | 6.20E-06                           |
| 0.001115933                          | 0.00462696                           | 0.048709048                        | 11.5354814                         | 2.02E-06                           |
| 0.002291265                          | 0.006208627                          | 0.055567767                        | 9.500404953                        | 6.52E-06                           |
| 0.001785998                          | 0.00692018                           | 0.068195055                        | 9.197967938                        | 3.49E-06                           |
| 0.002434745                          | 0.007408713                          | 0.064162738                        | 7.795763095                        | 6.73E-06                           |
| 0.001352905                          | 0.003971137                          | 0.034556564                        | 13.94001543                        | 3.46E-06                           |
| 0.001707632                          | 0.007347886                          | 0.074972222                        | 9.147812837                        | 2.80E-06                           |
| 0.001348396                          | 0.008099547                          | 0.084268135                        | 7.281663371                        | 2.45E-06                           |
| 0.001012517                          | 0.004175564                          | 0.045688662                        | 12.9126746                         | 1.67E-06                           |
| 0.003946542                          | 0.010572948                          | 0.091784705                        | 5.558304849                        | 1.19E-05                           |
| 0.00074208                           | 0.001244126                          | 0.009407385                        | 50.8622941                         | 3.14E-06                           |
| 0.001911663                          | 0.00384642                           | 0.027490073                        | 18.22464262                        | 6.77E-06                           |
| 0.001490514                          | 0.003776476                          | 0.025751904                        | 21.83550102                        | 6.28E-06                           |
| 0.001469003                          | 0.003492232                          | 0.032034761                        | 15.09005145                        | 4.21E-06                           |
| 0.002207886                          | 0.005759543                          | 0.040319948                        | 10.84822131                        | 1.09E-05                           |
| 0.004276902                          | 0.017302965                          | 0.179972602                        | 3.016865015                        | 8.55E-06                           |
| 0.002024886                          | 0.006770036                          | 0.061332231                        | 11.81707987                        | 4.90E-06                           |
| 0.001175891                          | 0.003843586                          | 0.032781993                        | 16.10305149                        | 3.16E-06                           |
| 0.005676506                          | 0.009576302                          | 0.083766958                        | 5.83138856                         | 2.03E-05                           |
| 0.006984323                          | 0.016335079                          | 0.118776881                        | 4.289688133                        | 2.92E-05                           |
| 0.003980547                          | 0.009117445                          | 0.092719049                        | 5.37730086                         | 9.41E-06                           |
| 0.002229581                          | 0.006955868                          | 0.057250473                        | 8.57151308                         | 6.72E-06                           |
| 0.001665186                          | 0.005639285                          | 0.041401188                        | 11.95449475                        | 5.31E-06                           |
| 0.001158962                          | 0.003053021                          | 0.024053286                        | 19.82976185                        | 4.03E-06                           |
| 0.004760718                          | 0.007440248                          | 0.06739123                         | 7.166185777                        | 1.54E-05                           |
| 0.004080333                          | 0.00977796                           | 0.085581299                        | 5.567671913                        | 1.47E-05                           |
| 0.002611202                          | 0.004457924                          | 0.036885083                        | 13.19823407                        | 9.62E-06                           |
| 0.001388681                          | 0.004386139                          | 0.037234819                        | 13.56561989                        | 3.38E-06                           |
| 0.001461211                          | 0.003714754                          | 0.033013383                        | 15.33083844                        | 4.34E-06                           |
| 0.003138338                          | 0.010634472                          | 0.091214262                        | 5.936362568                        | 8.10E-06                           |
| 0.000607582                          | 0.002056835                          | 0.015436722                        | 33.21130811                        | 1.85E-06                           |
| 0.002932007                          | 0.009538827                          | 0.088083615                        | 6.239177336                        | 7.02E-06                           |
| 0.002110222                          | 0.011329106                          | 0.100320621                        | 5.498973718                        | 4.06E-06                           |
| 0.000984168                          | 0.004100091                          | 0.037642294                        | 13.57618967                        | 2.13E-06                           |
| 0.00688209                           | 0.002298278                          | 0.019606935                        | 27.45818046                        | 1.91E-06                           |
| 0.006064665                          | 0.00702319                           | 0.069172807                        | 7.004880564                        | 2.17E-05                           |
| 0.001306711                          | 0.004471508                          | 0.039556284                        | 14.09668976                        | 3.17E-06                           |
| 0.003657549                          | 0.010277898                          | 0.08275007                         | 6.096493731                        | 1.31E-05                           |
| 0.000851068                          | 0.003791369                          | 0.034313216                        | 15.74553193                        | 1.84E-06                           |
| 0.00096036                           | 0.004806426                          | 0.049314705                        | 11.99357188                        | 1.52E-06                           |
| 0.001637399                          | 0.003267766                          | 0.034866228                        | 16.12470814                        | 5.03E-06                           |
| 0.003917943                          | 0.006889639                          | 0.053198857                        | 8.987083639                        | 1.64E-05                           |
| 0.001249733                          | 0.003873326                          | 0.036837053                        | 14.5782208                         | 2.91E-06                           |
| 0.002392156                          | 0.007648712                          | 0.066603295                        | 7.876134465                        | 6.06E-06                           |
| 0.002576226                          | 0.008799186                          | 0.059466908                        | 7.909368374                        | 9.46E-06                           |
| 0.001745645                          | 0.004640359                          | 0.031830459                        | 17.70029966                        | 7.11E-06                           |
| 0.003728535                          | 0.006673736                          | 0.051575141                        | 9.366755139                        | 1.51E-05                           |
| 0.002100196                          | 0.006689305                          | 0.069036741                        | 8.580497013                        | 3.91E-06                           |
| 0.004987743                          | 0.013674037                          | 0.117092152                        | 4.379978659                        | 1.66E-05                           |
| 0.002904268                          | 0.00751174                           | 0.068806546                        | 7.53996897                         | 7.70E-06                           |
| 0.002492443                          | 0.007716354                          | 0.061857685                        | 7.941412596                        | 7.29E-06                           |
| 0.002932047                          | 0.014808132                          | 0.120909557                        | 4.140414843                        | 9.63E-06                           |
| 0.002891721                          | 0.010370357                          | 0.078695733                        | 6.648294194                        | 9.16E-06                           |
| 0.00157491                           | 0.00526405                           | 0.046861144                        | 11.7836932                         | 3.74E-06                           |
| 0.001590143                          | 0.001800578                          | 0.017729534                        | 27.31260459                        | 5.60E-06                           |
| 0.002270513                          | 0.005621581                          | 0.043883563                        | 10.30196774                        | 8.63E-06                           |
| 0.003104805                          | 0.003399449                          | 0.039448584                        | 12.79771535                        | 7.98E-06                           |
| 0.002257734                          | 0.007743157                          | 0.060262223                        | 8.612733156                        | 6.48E-06                           |
| 0.002040099                          | 0.004708727                          | 0.043651307                        | 10.8613811                         | 5.91E-06                           |
| 0.003613791                          | 0.008319569                          | 0.08326374                         | 5.945678687                        | 9.77E-06                           |
| 0.002578057                          | 0.005963485                          | 0.060872574                        | 8.252178549                        | 6.51E-06                           |
| 0.003755014                          | 0.007111708                          | 0.077971178                        | 6.959019599                        | 9.80E-06                           |
| 0.002398444                          | 0.005792942                          | 0.046529629                        | 9.768114844                        | 8.20E-06                           |
| 0.001043127                          | 0.003524261                          | 0.028034275                        | 18.4841051                         | 2.94E-06                           |
| 0.001664188                          | 0.003695568                          | 0.037840389                        | 13.00499059                        | 3.90E-06                           |
| 0.001249978                          | 0.004153974                          | 0.033842559                        | 15.50230495                        | 3.19E-06                           |
| 0.001641131                          | 0.008871835                          | 0.093204155                        | 6.003051067                        | 3.13E-06                           |
| 0.001828255                          | 0.003150755                          | 0.024768166                        | 19.70651903                        | 7.31E-06                           |
| 0.005063813                          | 0.012890478                          | 0.100768583                        | 4.568298892                        | 2.09E-05                           |
| 0.005560272                          | 0.00700785                           | 0.060969324                        | 7.857955715                        | 2.37E-05                           |
| 0.000867181                          | 0.00215127                           | 0.021297057                        | 24.7129266                         | 2.04E-06                           |

| original_gldm_GrayLevelVariance | original_gldm_HighGrayLevelEmphasis | original_gldm_GrayLevelNonUniformityNormalized | original_gldm_DependenceEntropy | original_gldm_DependenceNonUniformity |
|---------------------------------|-------------------------------------|------------------------------------------------|---------------------------------|---------------------------------------|
| 121.7524336                     | 408.6253534                         | 0.04681                                        | 6.850597267                     | 546.7587182                           |
| 23.99117618                     | 69.36256584                         | 0.108165518                                    | 6.020501472                     | 146.5743316                           |
| 56.11858457                     | 163.2829205                         | 0.060610516                                    | 7.03034161                      | 198.2607562                           |
| 113.4390406                     | 422.5076766                         | 0.058167955                                    | 6.733420168                     | 183.0368475                           |
| 52.95846774                     | 150.8991155                         | 0.065581629                                    | 6.538002622                     | 472.691723                            |
| 39.63591368                     | 176.2424242                         | 0.070211203                                    | 6.166308837                     | 152.7818182                           |
| 71.21682057                     | 298.3986905                         | 0.043421483                                    | 7.268532481                     | 1020.994337                           |
| 43.23511126                     | 220.5920125                         | 0.090450575                                    | 6.632538646                     | 726.9099452                           |
| 86.2886909                      | 304.4062912                         | 0.050601961                                    | 6.956258848                     | 949.983722                            |
| 65.02968019                     | 191.886194                          | 0.056918648                                    | 6.453975169                     | 241.2817164                           |
| 60.41592497                     | 237.7931034                         | 0.053476947                                    | 6.64190434                      | 321.3992042                           |
| 49.22541189                     | 293.9544469                         | 0.06387604                                     | 6.572468557                     | 460.1288503                           |
| 29.5558858                      | 71.60042849                         | 0.147796031                                    | 6.171479229                     | 204.5018747                           |
| 78.09204403                     | 215.5154339                         | 0.070025362                                    | 6.595699329                     | 322.5864881                           |
| 67.75656461                     | 254.0020161                         | 0.072488172                                    | 6.59304252                      | 377.3205645                           |
| 93.64739441                     | 243.6930987                         | 0.087106024                                    | 6.715644908                     | 629.8048446                           |
| 71.43193354                     | 470.8291457                         | 0.044054724                                    | 6.709867311                     | 308.7236181                           |
| 29.56361587                     | 79.46472019                         | 0.10058285                                     | 6.282072418                     | 170.9059205                           |
| 33.39716727                     | 225.9822804                         | 0.066302074                                    | 6.416780887                     | 251.6918336                           |
| 54.10924231                     | 299.650125                          | 0.059437688                                    | 6.780891107                     | 1036.474899                           |
| 32.14395845                     | 88.17096561                         | 0.098598995                                    | 6.616425116                     | 379.3187831                           |
| 37.08095489                     | 187.9221501                         | 0.059290989                                    | 6.297234846                     | 258.5625579                           |
| 49.41156006                     | 137.7421875                         | 0.076330185                                    | 6.401276577                     | 189.4160156                           |
| 85.5525274                      | 321.3090291                         | 0.038604266                                    | 7.203702309                     | 541.8832641                           |
| 40.58867567                     | 121.1932443                         | 0.097414486                                    | 6.238516506                     | 203.5326002                           |
| 75.75571086                     | 396.088645                          | 0.038000514                                    | 7.084963375                     | 559.056564                            |
| 90.07357929                     | 432.7185277                         | 0.050977255                                    | 6.906952697                     | 695.3680792                           |
| 54.4953415                      | 219.5648081                         | 0.06191428                                     | 6.738696429                     | 530.7313541                           |
| 31.72641873                     | 258.8791946                         | 0.052054712                                    | 6.123834079                     | 134.4004474                           |
| 29.48963952                     | 107.5374878                         | 0.068745147                                    | 6.506817814                     | 381.5228822                           |
| 52.72992585                     | 233.5979403                         | 0.079940759                                    | 6.758339663                     | 719.1424968                           |
| 58.40749203                     | 133.7757371                         | 0.091042924                                    | 6.619529719                     | 299.4311261                           |
| 132.1938046                     | 398.4019822                         | 0.048399353                                    | 7.073509216                     | 631.1876742                           |
| 92.86866981                     | 242.4259574                         | 0.067864554                                    | 6.947523773                     | 370.946383                            |
| 53.90691065                     | 270.6730245                         | 0.055756636                                    | 6.828289127                     | 896.1035422                           |
| 43.46705187                     | 147.0260087                         | 0.103652979                                    | 6.437940035                     | 421.5448483                           |
| 80.10454706                     | 188.8500403                         | 0.087343701                                    | 6.611780822                     | 571.9959688                           |
| 232.0364851                     | 486.5814765                         | 0.083575897                                    | 7.142947228                     | 523.8320093                           |
| 61.96089365                     | 308.4764228                         | 0.037453896                                    | 6.903677107                     | 293.5235772                           |
| 116.9930138                     | 555.4950481                         | 0.028801447                                    | 7.445046145                     | 1666.122421                           |
| 73.44158663                     | 257.2875867                         | 0.068514673                                    | 6.767327282                     | 459.3222822                           |
| 105.2288183                     | 733.2580812                         | 0.026634966                                    | 7.141453032                     | 1231.190328                           |
| 69.46706624                     | 231.285245                          | 0.052796868                                    | 6.934284266                     | 729.0355872                           |
| 92.6071547                      | 365.6402733                         | 0.047622479                                    | 6.784619746                     | 613.818328                            |
| 36.3594482                      | 122.9600939                         | 0.070923367                                    | 6.391033596                     | 248.0985915                           |
| 77.15725349                     | 308.9176685                         | 0.056867097                                    | 6.787036462                     | 556.091439                            |
| 59.63776703                     | 311.9057431                         | 0.055381637                                    | 6.945583512                     | 854.2078036                           |
| 28.38291893                     | 219.8128588                         | 0.060011257                                    | 6.435764603                     | 180.6073479                           |
| 55.07633102                     | 223.893067                          | 0.045927857                                    | 6.568848026                     | 212.3160987                           |
| 23.11085429                     | 135.1856509                         | 0.112114203                                    | 6.08344247                      | 206.3106509                           |
| 52.62005154                     | 206.9443363                         | 0.068183227                                    | 6.491309557                     | 536.1693266                           |
| 93.40456883                     | 549.6597449                         | 0.030710491                                    | 7.081483705                     | 1000.076239                           |
| 50.90210458                     | 353.4168883                         | 0.046624682                                    | 6.795044288                     | 1063.229167                           |
| 59.21824459                     | 167.5742754                         | 0.071717142                                    | 6.491833345                     | 211.057971                            |
| 47.0000701                      | 144.9654135                         | 0.067441913                                    | 6.662717434                     | 225.9413534                           |
| 36.42853938                     | 160.5738462                         | 0.068708481                                    | 6.526865682                     | 378.1384615                           |
| 83.90647466                     | 261.2472188                         | 0.045243116                                    | 6.967509448                     | 895.0247219                           |
| 86.86626296                     | 353.1844997                         | 0.061873608                                    | 6.972468882                     | 604.9456333                           |
| 54.46509413                     | 241.6134709                         | 0.060809955                                    | 6.518679655                     | 369.538835                            |
| 146.4176342                     | 864.4216234                         | 0.029423338                                    | 7.534585377                     | 2076.021799                           |
| 41.52000862                     | 181.0702152                         | 0.085171139                                    | 6.643095324                     | 251.8301246                           |
| 56.00254794                     | 182.1146067                         | 0.063907195                                    | 6.75354072                      | 504.7250936                           |
| 60.00429439                     | 205.5256521                         | 0.067804239                                    | 6.77776421                      | 1035.536535                           |
| 71.0508421                      | 361.1133412                         | 0.041048386                                    | 7.314024591                     | 1442.33963                            |
| 26.23784009                     | 201.1468354                         | 0.077067778                                    | 6.253801987                     | 151.5189873                           |
| 44.73502009                     | 141.178405                          | 0.080810891                                    | 6.731499648                     | 578.5758674                           |
| 42.1004907                      | 183.7177914                         | 0.082238699                                    | 6.442849212                     | 218.9064417                           |
| 93.70446543                     | 345.43696                           | 0.047252122                                    | 7.212313901                     | 1195.06752                            |
| 133.8056431                     | 550.5663309                         | 0.038085352                                    | 7.156080982                     | 1455.054635                           |
| 32.07470241                     | 134.5117322                         | 0.080100219                                    | 6.576816385                     | 449.3809524                           |
| 65.04898361                     | 155.4819092                         | 0.081823467                                    | 6.512465092                     | 213.886836                            |
| 45.75913133                     | 220.7568765                         | 0.105832396                                    | 6.385997045                     | 608.7226107                           |
| 62.29638489                     | 307.9425186                         | 0.06695411                                     | 6.713184292                     | 401.4695042                           |
| 109.4168292                     | 476.0571049                         | 0.037726816                                    | 6.915437582                     | 814.1394422                           |
| 92.68263002                     | 404.0907058                         | 0.032960695                                    | 7.094535951                     | 623.3839029                           |
| 53.98405354                     | 268.3599106                         | 0.048401856                                    | 6.629953769                     | 329.7317437                           |
| 42.58349109                     | 221.6807179                         | 0.059778958                                    | 6.797699973                     | 441.0584307                           |
| 26.2226847                      | 113.736952                          | 0.102056738                                    | 6.131407155                     | 148.058595                            |
| 51.43241465                     | 167.1177504                         | 0.060394688                                    | 6.592441303                     | 357.056239                            |
| 152.053829                      | 626.1351005                         | 0.029287025                                    | 7.276264581                     | 595.231723                            |
| 126.0563481                     | 404.6726998                         | 0.049138285                                    | 6.790531219                     | 499.2182001                           |
| 71.64345024                     | 257.8999444                         | 0.068751369                                    | 6.7285568                       | 328.5252918                           |
| 112.6944985                     | 271.1355154                         | 0.081114703                                    | 6.92010883                      | 436.7308045                           |
| 60.55129838                     | 312.0312398                         | 0.04148124                                     | 7.045567212                     | 653.5629678                           |
| 84.7627764                      | 360.6441164                         | 0.05367658                                     | 6.924281948                     | 505.5887659                           |
| 12.61771972                     | 85.6573107                          | 0.159370335                                    | 6.167678775                     | 148.6096606                           |
| 125.1363995                     | 427.2255765                         | 0.042152868                                    | 7.094024969                     | 506.4683438                           |
| 42.14240592                     | 144.2983224                         | 0.073926085                                    | 6.61867231                      | 465.2582057                           |
| 44.11120396                     | 194.4583333                         | 0.060185807                                    | 6.643710133                     | 295.7855191                           |
| 46.3787169                      | 130.4562963                         | 0.075327298                                    | 6.546587299                     | 341.8098765                           |
| 18.2301972                      | 61.49309816                         | 0.152448577                                    | 6.045845338                     | 145.5015337                           |
| 91.82017313                     | 409.3240974                         | 0.035297265                                    | 6.93451386                      | 646.6414777                           |
| 67.49327654                     | 409.9039167                         | 0.051401849                                    | 6.826425266                     | 1210.212039                           |
| 57.79914564                     | 231.9751515                         | 0.063636915                                    | 6.803413928                     | 590.3418182                           |
| 71.19068096                     | 383.7539063                         | 0.036846332                                    | 6.988760951                     | 1136.703585                           |
| 72.77807819                     | 206.9979544                         | 0.081737074                                    | 6.820713797                     | 508.7895967                           |
| 98.14247389                     | 383.8448704                         | 0.03681424                                     | 7.242355518                     | 604.6450124                           |
| 101.841709                      | 255.9856734                         | 0.072437829                                    | 6.650817927                     | 186.4937918                           |
| 37.34310968                     | 161.5827338                         | 0.056990379                                    | 6.622517037                     | 155.5899281                           |
| 37.55598269                     | 123.2066159                         | 0.100602548                                    | 6.641038043                     | 708.8330447                           |

| original_gldm_GrayLevelNonUniformity | original_gldm_SmallDependenceEmphasis | original_gldm_DependenceNonUniformityNormalized | original_gldm_DependenceVariance | original_gldm_LargeDependenceEmphasis |
|--------------------------------------|---------------------------------------|-------------------------------------------------|----------------------------------|---------------------------------------|
| 99.33081998                          | 0.487531601                           | 0.257661978                                     | 2.856897046                      | 8.524976437                           |
| 101.1347594                          | 0.295745511                           | 0.156763991                                     | 4.135727073                      | 15.46417112                           |
| 92.97653194                          | 0.28326146                            | 0.1292443                                       | 10.83935277                      | 28.57366362                           |
| 56.83009212                          | 0.38972913                            | 0.187345801                                     | 4.693542051                      | 13.81678608                           |
| 155.2972973                          | 0.395464912                           | 0.199616437                                     | 4.127065119                      | 12.30067568                           |
| 46.33939394                          | 0.415606509                           | 0.231487603                                     | 2.030018365                      | 8.06969697                            |
| 245.3748009                          | 0.370138156                           | 0.180674984                                     | 5.456865282                      | 15.32631393                           |
| 462.0215348                          | 0.305897307                           | 0.142308133                                     | 6.449256743                      | 20.17462803                           |
| 230.0365156                          | 0.408119394                           | 0.208971342                                     | 3.161963283                      | 10.47074351                           |
| 61.01679104                          | 0.425215615                           | 0.225076228                                     | 2.393235548                      | 8.746268657                           |
| 80.64323607                          | 0.408488622                           | 0.213129446                                     | 2.710479564                      | 9.655172414                           |
| 147.2342733                          | 0.393478134                           | 0.199622061                                     | 3.339604839                      | 11.16746204                           |
| 275.9351901                          | 0.226073571                           | 0.109535016                                     | 8.283560582                      | 29.75415104                           |
| 120.2335469                          | 0.370014135                           | 0.187877978                                     | 3.875066865                      | 12.57018055                           |
| 143.8165323                          | 0.393567876                           | 0.190181736                                     | 4.370935224                      | 13.17842742                           |
| 381.1759598                          | 0.311066506                           | 0.143922496                                     | 6.663869361                      | 20.25731261                           |
| 52.60134003                          | 0.450291271                           | 0.258562494                                     | 1.46362185                       | 6.494137353                           |
| 124.0186537                          | 0.275738804                           | 0.13860983                                      | 5.598752606                      | 19.77858881                           |
| 86.06009245                          | 0.360139111                           | 0.193907422                                     | 2.69169114                       | 10.64252696                           |
| 309.0165416                          | 0.377088355                           | 0.199360435                                     | 3.00110379                       | 10.72071552                           |
| 298.1633598                          | 0.254600863                           | 0.125436106                                     | 7.426134137                      | 24.25132275                           |
| 63.97497683                          | 0.433773221                           | 0.239631657                                     | 2.030435279                      | 7.78776645                            |
| 78.16210938                          | 0.367176952                           | 0.184976578                                     | 3.49937439                       | 12.19726563                           |
| 102.185493                           | 0.396724155                           | 0.204716005                                     | 3.514644245                      | 11.19342652                           |
| 124.008641                           | 0.31562042                            | 0.159884211                                     | 4.231589808                      | 15.1948154                            |
| 90.02321655                          | 0.444202577                           | 0.235988419                                     | 2.382360378                      | 8.374419586                           |
| 164.8094649                          | 0.414923529                           | 0.215084466                                     | 3.06038993                       | 10.07887411                           |
| 171.0072411                          | 0.37386019                            | 0.192154726                                     | 3.367668487                      | 11.59015206                           |
| 23.26845638                          | 0.513650185                           | 0.300672142                                     | 1.432197749                      | 5.604026846                           |
| 141.2025316                          | 0.342334579                           | 0.185746291                                     | 3.515878486                      | 12.31256086                           |
| 380.3581337                          | 0.322566987                           | 0.151143862                                     | 6.666141192                      | 19.45901639                           |
| 188.3678105                          | 0.312698586                           | 0.144722632                                     | 6.515652708                      | 19.96955051                           |
| 156.2815113                          | 0.392740907                           | 0.195474659                                     | 4.10545516                       | 12.43821617                           |
| 159.4817021                          | 0.336759187                           | 0.157849525                                     | 6.147423087                      | 18.07489362                           |
| 245.5522252                          | 0.404780286                           | 0.203474919                                     | 3.868143567                      | 11.76521344                           |
| 310.8552851                          | 0.30116729                            | 0.140561803                                     | 6.137391801                      | 19.96765589                           |
| 325.0059124                          | 0.313976432                           | 0.153721034                                     | 5.15308481                       | 17.18382155                           |
| 431.3352064                          | 0.238262708                           | 0.101498161                                     | 14.43901572                      | 40.15714009                           |
| 46.06829268                          | 0.38529924                            | 0.238637055                                     | 1.715145747                      | 7.687804878                           |
| 209.3865199                          | 0.418633921                           | 0.229177775                                     | 3.228491152                      | 9.866024759                           |
| 177.7270625                          | 0.352566885                           | 0.177071042                                     | 4.32268642                       | 13.89591365                           |
| 102.997414                           | 0.538688868                           | 0.318383845                                     | 1.220368967                      | 5.021205069                           |
| 192.8669587                          | 0.390383859                           | 0.199571746                                     | 3.44846025                       | 11.31699973                           |
| 118.4847267                          | 0.456126464                           | 0.246711547                                     | 2.282906504                      | 7.92926045                            |
| 90.6400626                           | 0.369431234                           | 0.194130353                                     | 3.282593842                      | 11.40375587                           |
| 156.1001821                          | 0.403821528                           | 0.202583402                                     | 3.458868949                      | 11.20327869                           |
| 252.6510302                          | 0.371794691                           | 0.187244148                                     | 4.19689711                       | 13.10170978                           |
| 52.26980482                          | 0.36666525                            | 0.207356312                                     | 2.45922116                       | 9.732491389                           |
| 39.08460635                          | 0.454290798                           | 0.249490128                                     | 2.542841007                      | 8.294947121                           |
| 151.5784024                          | 0.285488539                           | 0.152596635                                     | 4.351438588                      | 16.4260355                            |
| 175.1627092                          | 0.386143085                           | 0.208707406                                     | 2.774961396                      | 10.00350331                           |
| 103.5250667                          | 0.514640013                           | 0.296670495                                     | 1.54382913                       | 5.812815188                           |
| 210.3705674                          | 0.429064009                           | 0.235644762                                     | 2.194342078                      | 8.140070922                           |
| 79.17572464                          | 0.376047386                           | 0.191175698                                     | 4.117123503                      | 12.73007246                           |
| 89.69774436                          | 0.356156476                           | 0.169880717                                     | 4.748790774                      | 15.04661654                           |
| 133.9815385                          | 0.361827364                           | 0.19391716                                      | 2.921781986                      | 10.92923077                           |
| 183.0084054                          | 0.423866222                           | 0.221266928                                     | 2.833839088                      | 9.524598269                           |
| 213.9589358                          | 0.341837849                           | 0.1749409                                       | 4.027812558                      | 13.63100058                           |
| 100.2148058                          | 0.420767532                           | 0.22423473                                      | 2.414052927                      | 8.822815534                           |
| 268.6056523                          | 0.438052347                           | 0.227409552                                     | 4.570419045                      | 11.81476613                           |
| 150.412231                           | 0.316539258                           | 0.142599165                                     | 6.497934433                      | 20.38052095                           |
| 170.6322097                          | 0.38335958                            | 0.189035616                                     | 4.09852712                       | 12.83220974                           |
| 392.5187424                          | 0.380335199                           | 0.178880037                                     | 5.076293723                      | 14.93539471                           |
| 312.9118457                          | 0.361876413                           | 0.189208924                                     | 4.950469478                      | 14.06099961                           |
| 60.8835443                           | 0.341615821                           | 0.191796187                                     | 3.195808364                      | 11.6278481                            |
| 312.0916624                          | 0.304202114                           | 0.149812498                                     | 6.473542016                      | 19.31227343                           |
| 107.2392638                          | 0.323975812                           | 0.167873038                                     | 4.249171967                      | 14.52453988                           |
| 295.32576                            | 0.373716581                           | 0.191210803                                     | 4.141785702                      | 12.77504                              |
| 223.065904                           | 0.45694534                            | 0.248430021                                     | 2.223784151                      | 7.796995049                           |
| 232.1304348                          | 0.301623525                           | 0.155065891                                     | 4.242506076                      | 15.84195997                           |
| 106.2886836                          | 0.347359382                           | 0.164654993                                     | 5.103667711                      | 15.95458045                           |
| 454.020979                           | 0.299924941                           | 0.141893382                                     | 5.995557729                      | 19.58741259                           |
| 152.588416                           | 0.353254724                           | 0.176160379                                     | 3.962577984                      | 13.42650285                           |
| 85.22487826                          | 0.487067101                           | 0.27186341                                      | 1.941189646                      | 6.853917663                           |
| 103.1999361                          | 0.475059693                           | 0.262977931                                     | 1.874539447                      | 6.93165123                            |
| 64.95529061                          | 0.413608436                           | 0.245701746                                     | 1.952250017                      | 7.709388972                           |
| 143.230384                           | 0.338901437                           | 0.184081148                                     | 3.365816985                      | 12.21619366                           |
| 97.77035491                          | 0.313608941                           | 0.154577865                                     | 4.571606644                      | 16.19415449                           |
| 103.0937317                          | 0.398107439                           | 0.209171786                                     | 2.79256063                       | 9.944346807                           |
| 68.50235143                          | 0.470496017                           | 0.254481284                                     | 2.633801877                      | 8.229585293                           |
| 97.73604827                          | 0.48012086                            | 0.250989543                                     | 2.984003775                      | 8.883358472                           |
| 123.6837132                          | 0.380846989                           | 0.182615504                                     | 4.590059143                      | 13.95386326                           |
| 265.1639645                          | 0.290613699                           | 0.133597677                                     | 7.650227987                      | 23.12358519                           |
| 127.4718516                          | 0.357322069                           | 0.21267913                                      | 2.454935754                      | 9.650178978                           |
| 130.9171792                          | 0.412175354                           | 0.207293467                                     | 4.392742911                      | 12.33825338                           |
| 244.1553525                          | 0.213015399                           | 0.097003695                                     | 11.77043098                      | 38.13315927                           |
| 100.5345912                          | 0.414617714                           | 0.2123557                                       | 3.360398015                      | 10.68553459                           |
| 202.7053246                          | 0.347138174                           | 0.169678412                                     | 5.178538349                      | 15.62873815                           |
| 88.11202186                          | 0.387115871                           | 0.202039289                                     | 3.855950835                      | 11.81420765                           |
| 152.5377778                          | 0.322985296                           | 0.168795001                                     | 4.316390794                      | 14.63555556                           |
| 198.7929448                          | 0.251938565                           | 0.111580931                                     | 9.40535963                       | 30.2392638                            |
| 84.07808564                          | 0.473450831                           | 0.271469974                                     | 1.962337176                      | 6.909319899                           |
| 266.4157824                          | 0.436603509                           | 0.233496438                                     | 2.366755636                      | 8.436233841                           |
| 210.0018182                          | 0.359359357                           | 0.17889146                                      | 4.454616713                      | 13.94848485                           |
| 160.355239                           | 0.457308905                           | 0.261191081                                     | 1.795594106                      | 6.909926471                           |
| 279.7042665                          | 0.334936782                           | 0.148681939                                     | 7.392871306                      | 20.92460549                           |
| 103.7057153                          | 0.40429012                            | 0.214641467                                     | 3.282051301                      | 10.42917998                           |
| 75.84240688                          | 0.362966434                           | 0.178122055                                     | 4.070524873                      | 13.45272206                           |
| 47.52997602                          | 0.360040923                           | 0.186558667                                     | 3.859784115                      | 12.65947242                           |
| 580.8791133                          | 0.273507473                           | 0.12276291                                      | 7.630944181                      | 25.21163838                           |

| original_gldm_LargeDependenceLowGrayLevelEmphasis | original_gldm_SmallDependenceHighGrayLevelEmphasis | original_gldm_LargeDependenceHighGrayLevelEmphasis | original_gldm_SmallDependenceLowGrayLevelEmphasis |
|---------------------------------------------------|----------------------------------------------------|----------------------------------------------------|---------------------------------------------------|
| 0.09581059                                        | 274.2694875                                        | 1618.874175                                        | 0.003640212                                       |
| 1.011198943                                       | 43.98116192                                        | 423.7775401                                        | 0.014838261                                       |
| 7.391026173                                       | 93.94623074                                        | 1152.453716                                        | 0.004944834                                       |
| 0.109406952                                       | 204.825273                                         | 6519.977482                                        | 0.003255714                                       |
| 0.701181109                                       | 102.4263832                                        | 589.0865709                                        | 0.010554474                                       |
| 0.127033094                                       | 112.3499852                                        | 813.6909091                                        | 0.008197105                                       |
| 0.291905514                                       | 164.6427285                                        | 1906.987967                                        | 0.002954142                                       |
| 0.217736226                                       | 116.0804162                                        | 2283.927655                                        | 0.001940011                                       |
| 0.169572666                                       | 154.2195924                                        | 3064.881874                                        | 0.004701361                                       |
| 0.329411152                                       | 127.8511767                                        | 743.9682836                                        | 0.00936522                                        |
| 0.169303049                                       | 132.7277968                                        | 1380.082228                                        | 0.004657581                                       |
| 0.088242094                                       | 178.1402008                                        | 1826.912364                                        | 0.002184512                                       |
| 1.858692644                                       | 40.39499868                                        | 777.0637386                                        | 0.009100875                                       |
| 0.302329197                                       | 137.4816925                                        | 1082.355271                                        | 0.005548768                                       |
| 0.175017879                                       | 163.3027254                                        | 1457.704637                                        | 0.003691032                                       |
| 0.406585461                                       | 116.7731785                                        | 4202.785878                                        | 0.003603177                                       |
| 0.028169757                                       | 239.0786053                                        | 2793.420436                                        | 0.002957904                                       |
| 1.43024874                                        | 55.57562415                                        | 523.0170316                                        | 0.014025018                                       |
| 0.101784551                                       | 118.5555322                                        | 1524.24114                                         | 0.003178196                                       |
| 0.08780509                                        | 161.2526849                                        | 1953.247355                                        | 0.002161405                                       |
| 1.577877514                                       | 46.79832866                                        | 763.9566799                                        | 0.007310501                                       |
| 0.12454711                                        | 121.8641533                                        | 814.6580167                                        | 0.005461264                                       |
| 0.489379513                                       | 91.17177886                                        | 654.9941406                                        | 0.010803704                                       |
| 0.220884264                                       | 165.0904303                                        | 2358.975066                                        | 0.004393353                                       |
| 0.489809889                                       | 78.87388183                                        | 733.8955224                                        | 0.007077503                                       |
| 0.071002783                                       | 215.4388668                                        | 2508.010131                                        | 0.003163807                                       |
| 0.068403935                                       | 238.3411387                                        | 2562.839777                                        | 0.002252225                                       |
| 0.175467207                                       | 128.241582                                         | 1288.713251                                        | 0.004306608                                       |
| 0.04600754                                        | 151.3831814                                        | 1265.017897                                        | 0.010903682                                       |
| 0.616371099                                       | 61.82147671                                        | 610.7263875                                        | 0.011827211                                       |
| 0.245654895                                       | 133.8471738                                        | 2005.739596                                        | 0.002235119                                       |
| 1.148384054                                       | 76.64036062                                        | 867.8666022                                        | 0.012402172                                       |
| 0.157823228                                       | 181.7246992                                        | 5922.04088                                         | 0.004506279                                       |
| 0.483755268                                       | 128.6177971                                        | 1820.629362                                        | 0.004980786                                       |
| 0.137056139                                       | 155.4788736                                        | 1681.992734                                        | 0.002932576                                       |
| 0.42137829                                        | 83.61767227                                        | 1369.990997                                        | 0.003945429                                       |
| 0.485810791                                       | 114.6800684                                        | 1235.298307                                        | 0.005927225                                       |
| 0.836359473                                       | 115.2213231                                        | 34089.89634                                        | 0.003859045                                       |
| 0.121232799                                       | 150.6499889                                        | 1696.850407                                        | 0.004249374                                       |
| 0.075248609                                       | 242.4701784                                        | 6838.39326                                         | 0.002559627                                       |
| 0.208283245                                       | 137.749596                                         | 1700.495759                                        | 0.002949123                                       |
| 0.047387009                                       | 406.4666277                                        | 3424.768813                                        | 0.002819163                                       |
| 0.28381588                                        | 141.0541877                                        | 1215.120996                                        | 0.006338757                                       |
| 0.100295881                                       | 236.5026181                                        | 1476.422428                                        | 0.003474909                                       |
| 0.465516088                                       | 78.84576853                                        | 589.3106416                                        | 0.008513479                                       |
| 0.130090463                                       | 191.1959725                                        | 1761.87286                                         | 0.002793807                                       |
| 0.118345189                                       | 166.8074447                                        | 2204.769399                                        | 0.002177391                                       |
| 0.087172316                                       | 107.9343311                                        | 1541.167623                                        | 0.00481602                                        |
| 0.190530499                                       | 134.9885456                                        | 1137.350176                                        | 0.008879027                                       |
| 0.241121155                                       | 71.29280281                                        | 1333.664941                                        | 0.003573918                                       |
| 0.151239055                                       | 126.4165363                                        | 1069.070455                                        | 0.004599067                                       |
| 0.039483384                                       | 334.9444471                                        | 2300.874221                                        | 0.002346708                                       |
| 0.053575714                                       | 197.15003                                          | 1909.92797                                         | 0.002226535                                       |
| 0.396847556                                       | 114.8152278                                        | 764.3985507                                        | 0.008944258                                       |
| 0.608754937                                       | 91.37570615                                        | 801.1458647                                        | 0.008439825                                       |
| 0.203446537                                       | 91.40438985                                        | 979.1902564                                        | 0.005403006                                       |
| 0.270056494                                       | 154.6304971                                        | 1580.510012                                        | 0.007096499                                       |
| 0.104748869                                       | 176.5003826                                        | 3163.618276                                        | 0.002412508                                       |
| 0.10275249                                        | 152.9939899                                        | 1182.994539                                        | 0.004211733                                       |
| 0.030885613                                       | 342.5701055                                        | 15366.47705                                        | 0.001847388                                       |
| 0.30775021                                        | 107.28693                                          | 1724.788222                                        | 0.003261617                                       |
| 0.32300322                                        | 116.3871037                                        | 967.1895131                                        | 0.007442766                                       |
| 0.301221591                                       | 130.5632657                                        | 1420.192088                                        | 0.003911081                                       |
| 0.330605023                                       | 181.3857552                                        | 2558.270366                                        | 0.00210223                                        |
| 0.104014369                                       | 94.74241495                                        | 1692.41519                                         | 0.003643775                                       |
| 0.79735676                                        | 77.9551927                                         | 1111.165458                                        | 0.005259844                                       |
| 0.204726738                                       | 100.8078123                                        | 1405.157975                                        | 0.004581021                                       |
| 0.18883181                                        | 175.9235807                                        | 2677.72784                                         | 0.00270978                                        |
| 0.051193473                                       | 341.1033097                                        | 2478.595015                                        | 0.002525849                                       |
| 0.362359205                                       | 75.89835399                                        | 1086.790545                                        | 0.004612882                                       |
| 0.767553439                                       | 88.07535892                                        | 1963.771363                                        | 0.009500524                                       |
| 0.198251887                                       | 116.1719102                                        | 2295.763869                                        | 0.002007389                                       |
| 0.113090046                                       | 168.8269764                                        | 2196.776218                                        | 0.002178048                                       |
| 0.058774824                                       | 293.0742021                                        | 2153.188579                                        | 0.002693972                                       |
| 0.080164955                                       | 234.6689052                                        | 1972.840626                                        | 0.004130564                                       |
| 0.093115833                                       | 149.7382713                                        | 1296.792101                                        | 0.005409393                                       |
| 0.142537024                                       | 105.1679863                                        | 1838.978715                                        | 0.003269181                                       |
| 0.356300349                                       | 64.09295815                                        | 957.9665971                                        | 0.005895969                                       |
| 0.53134982                                        | 97.24266696                                        | 1079.069713                                        | 0.009820826                                       |
| 0.063345525                                       | 319.233006                                         | 5989.079094                                        | 0.003124358                                       |
| 0.100633161                                       | 257.7986111                                        | 2077.751634                                        | 0.003728826                                       |
| 0.215310103                                       | 137.3946642                                        | 2456.702613                                        | 0.005601841                                       |
| 0.480978832                                       | 110.9362631                                        | 8034.438666                                        | 0.004525802                                       |
| 0.106698474                                       | 132.0647228                                        | 2548.325415                                        | 0.002750051                                       |
| 0.108366148                                       | 199.9979302                                        | 3145.655187                                        | 0.002590088                                       |
| 1.571196827                                       | 27.9221267                                         | 1092.490209                                        | 0.005265772                                       |
| 0.147985784                                       | 250.4221474                                        | 2100.165618                                        | 0.002688974                                       |
| 0.535329304                                       | 93.46373186                                        | 832.4128373                                        | 0.005954346                                       |
| 0.227379663                                       | 109.2512601                                        | 1200.866803                                        | 0.00621679                                        |
| 0.657310504                                       | 76.83957855                                        | 739.6967901                                        | 0.010437359                                       |
| 1.418238152                                       | 36.34263207                                        | 798.2829755                                        | 0.008396785                                       |
| 0.07720536                                        | 218.0750943                                        | 2835.474391                                        | 0.003639101                                       |
| 0.043285583                                       | 230.472052                                         | 2460.949257                                        | 0.002041947                                       |
| 0.224737565                                       | 127.7451568                                        | 1547.098788                                        | 0.004006897                                       |
| 0.058249009                                       | 203.8309424                                        | 2040.786535                                        | 0.003181257                                       |
| 0.4638897                                         | 124.7488949                                        | 1614.44623                                         | 0.003913043                                       |
| 0.123363212                                       | 185.7049036                                        | 4576.561945                                        | 0.003964444                                       |
| 0.300661138                                       | 144.3818325                                        | 1874.982808                                        | 0.006416653                                       |
| 0.382114132                                       | 89.9260748                                         | 1072.781775                                        | 0.006272895                                       |
| 0.738945982                                       | 75.67876754                                        | 1220.784725                                        | 0.003800786                                       |



| original_gldm_LowGrayLevelEmphasis | original_gldm_DistanceZoneVariabilityNormalized | original_gldm_LowIntensityEmphasis | original_gldm_LargeDistanceEmphasis | original_gldm_HighIntensitySmallDistanceEmphasis |
|------------------------------------|-------------------------------------------------|------------------------------------|-------------------------------------|--------------------------------------------------|
| 0.00882798                         | 0.993168313                                     | 0.007540928                        | 1.010282776                         | 548.9515853                                      |
| 0.061700525                        | 1                                               | 0.052433364                        | 1                                   | 146.0430464                                      |
| 0.089754834                        | 1                                               | 0.019139562                        | 1                                   | 327.1149897                                      |
| 0.008107239                        | 1                                               | 0.007942404                        | 1                                   | 533.4389671                                      |
| 0.035966804                        | 1                                               | 0.026507058                        | 1                                   | 254.0354746                                      |
| 0.017037058                        | 1                                               | 0.019074081                        | 1                                   | 258.9903537                                      |
| 0.011792173                        | 0.992350304                                     | 0.007781004                        | 1.011518771                         | 443.1321459                                      |
| 0.00855235                         | 0.998789347                                     | 0.006092457                        | 1.001817081                         | 388.5427014                                      |
| 0.01362494                         | 0.999040307                                     | 0.011799714                        | 1.00144023                          | 370.4672348                                      |
| 0.028908928                        | 1                                               | 0.022346212                        | 1                                   | 291.8245614                                      |
| 0.013630962                        | 1                                               | 0.011244806                        | 1                                   | 323.4379458                                      |
| 0.00654059                         | 0.992055737                                     | 0.005508804                        | 1.011964108                         | 437.4376869                                      |
| 0.053690983                        | 1                                               | 0.039434273                        | 1                                   | 190.1902552                                      |
| 0.019053304                        | 1                                               | 0.014879171                        | 1                                   | 358.4520167                                      |
| 0.010990109                        | 1                                               | 0.009297049                        | 1                                   | 410.2972973                                      |
| 0.01626819                         | 1                                               | 0.011007926                        | 1                                   | 395.2338377                                      |
| 0.005288449                        | 1                                               | 0.006262568                        | 1                                   | 519.7694754                                      |
| 0.063551366                        | 1                                               | 0.051619394                        | 1                                   | 199.9183099                                      |
| 0.008648982                        | 1                                               | 0.008484825                        | 1                                   | 321.9906542                                      |
| 0.006900178                        | 0.996373539                                     | 0.005725793                        | 1.005449591                         | 422.979337                                       |
| 0.047970206                        | 1                                               | 0.026987638                        | 1                                   | 191.5819277                                      |
| 0.013739608                        | 1                                               | 0.012417016                        | 1                                   | 268.411215                                       |
| 0.035249691                        | 1                                               | 0.028999218                        | 1                                   | 246.2184466                                      |
| 0.013846918                        | 0.998323555                                     | 0.010988279                        | 1.002516779                         | 414.6602349                                      |
| 0.030076813                        | 1                                               | 0.024932587                        | 1                                   | 242.1723356                                      |
| 0.007875429                        | 1                                               | 0.007497496                        | 1                                   | 473.4682081                                      |
| 0.005791489                        | 1                                               | 0.00538695                         | 1                                   | 574.9041005                                      |
| 0.013533154                        | 1                                               | 0.012181309                        | 1                                   | 338.0242424                                      |
| 0.014587614                        | 1                                               | 0.019594553                        | 1                                   | 288.2765152                                      |
| 0.040049982                        | 1                                               | 0.035532934                        | 1                                   | 174.8606658                                      |
| 0.009460908                        | 1                                               | 0.006639938                        | 1                                   | 415.4760479                                      |
| 0.048137259                        | 0.997187066                                     | 0.03816061                         | 1.004225352                         | 252.9609155                                      |
| 0.012356651                        | 0.995807146                                     | 0.011525002                        | 1.006302521                         | 456.3609944                                      |
| 0.021480003                        | 1                                               | 0.014825422                        | 1                                   | 395.5965116                                      |
| 0.008529187                        | 0.995005026                                     | 0.00705599                         | 1.007511267                         | 379.9111167                                      |
| 0.017644674                        | 0.997923159                                     | 0.01277927                         | 1.003118503                         | 281.8742204                                      |
| 0.023431857                        | 1                                               | 0.018101863                        | 1                                   | 372.0917874                                      |
| 0.023548555                        | 0.998430142                                     | 0.015264019                        | 1.002356638                         | 501.9632757                                      |
| 0.012013637                        | 1                                               | 0.010999176                        | 1                                   | 377.2041522                                      |
| 0.0068087                          | 0.997740116                                     | 0.00611848                         | 1.003393665                         | 575.8315187                                      |
| 0.011213854                        | 1                                               | 0.008171017                        | 1                                   | 395.8631476                                      |
| 0.006972042                        | 0.996686007                                     | 0.005504721                        | 1.004979253                         | 753.8742739                                      |
| 0.019514396                        | 0.998760075                                     | 0.01597563                         | 1.001861042                         | 354.2575993                                      |
| 0.009259769                        | 0.998445999                                     | 0.00805294                         | 1.002332815                         | 504.8413686                                      |
| 0.032598758                        | 1                                               | 0.024509061                        | 1                                   | 206.693609                                       |
| 0.008804704                        | 1                                               | 0.006848083                        | 1                                   | 463.2686688                                      |
| 0.006954472                        | 0.997905761                                     | 0.005690255                        | 1.003144654                         | 447.6700734                                      |
| 0.009664218                        | 1                                               | 0.011602421                        | 1                                   | 284.3709677                                      |
| 0.019519399                        | 1                                               | 0.019194047                        | 1                                   | 285.4263736                                      |
| 0.013930532                        | 1                                               | 0.01267883                         | 1                                   | 249.0074074                                      |
| 0.013108646                        | 0.998231655                                     | 0.011837909                        | 1.002654867                         | 315.7772124                                      |
| 0.005722779                        | 0.997994989                                     | 0.004929953                        | 1.003010537                         | 638.3569995                                      |
| 0.005559956                        | 0.999091735                                     | 0.005085098                        | 1.001363017                         | 452.9669468                                      |
| 0.028080606                        | 1                                               | 0.02457278                         | 1                                   | 294.544086                                       |
| 0.030416973                        | 1                                               | 0.023752072                        | 1                                   | 251.575188                                       |
| 0.01666124                         | 0.994842737                                     | 0.015373414                        | 1.007755946                         | 245.1889862                                      |
| 0.021020322                        | 1                                               | 0.016440052                        | 1                                   | 358.0473113                                      |
| 0.007216423                        | 1                                               | 0.00694446                         | 1                                   | 522.8498113                                      |
| 0.010568414                        | 1                                               | 0.010026243                        | 1                                   | 350.2297818                                      |
| 0.003951645                        | 0.996935879                                     | 0.004262552                        | 1.004603244                         | 765.1516879                                      |
| 0.012653568                        | 1                                               | 0.010103633                        | 1                                   | 335.3553719                                      |
| 0.021976037                        | 1                                               | 0.019550785                        | 1                                   | 297.0722997                                      |
| 0.015092289                        | 0.989211936                                     | 0.010225925                        | 1.016270338                         | 338.0671673                                      |
| 0.010058174                        | 0.983806747                                     | 0.005885554                        | 1.024489796                         | 487.1672684                                      |
| 0.00925445                         | 1                                               | 0.010239744                        | 1                                   | 272.3878205                                      |
| 0.025293828                        | 0.99223011                                      | 0.017539992                        | 1.011700468                         | 256.0113105                                      |
| 0.012943571                        | 1                                               | 0.01375004                         | 1                                   | 305.9594883                                      |
| 0.009944271                        | 0.992467151                                     | 0.007242489                        | 1.011342155                         | 465.6904537                                      |
| 0.005728948                        | 1                                               | 0.005419373                        | 1                                   | 728.4085526                                      |
| 0.019422363                        | 1                                               | 0.015496771                        | 1                                   | 248.2732068                                      |
| 0.040626177                        | 1                                               | 0.0279653                          | 1                                   | 253.5357873                                      |
| 0.008463717                        | 0.991130996                                     | 0.00643432                         | 1.013363029                         | 397.8962509                                      |
| 0.007021986                        | 1                                               | 0.005926907                        | 1                                   | 479.1939121                                      |
| 0.006307718                        | 1                                               | 0.005474432                        | 1                                   | 589.7782194                                      |
| 0.010180944                        | 0.993003002                                     | 0.009068978                        | 1.010532475                         | 484.2636044                                      |
| 0.011552429                        | 1                                               | 0.012473519                        | 1                                   | 348.0286145                                      |
| 0.010284569                        | 1                                               | 0.009468043                        | 1                                   | 304.7805405                                      |
| 0.020121722                        | 1                                               | 0.018673318                        | 1                                   | 202.809816                                       |
| 0.034322027                        | 0.997385625                                     | 0.025864941                        | 1.003926702                         | 242.332788                                       |
| 0.00720071                         | 1                                               | 0.006745532                        | 1                                   | 677.7995227                                      |
| 0.009155021                        | 1                                               | 0.007864473                        | 1                                   | 527.3355019                                      |
| 0.014760662                        | 1                                               | 0.01441374                         | 1                                   | 370.9291339                                      |
| 0.019434869                        | 0.998027615                                     | 0.014508894                        | 1.0029615                           | 401.9447187                                      |
| 0.008827204                        | 1                                               | 0.007596636                        | 1                                   | 368.9809306                                      |
| 0.007905675                        | 0.998275863                                     | 0.006728692                        | 1.002588438                         | 474.6145384                                      |
| 0.034450371                        | 1                                               | 0.023802297                        | 1                                   | 134.1101449                                      |
| 0.009199252                        | 1                                               | 0.006345972                        | 1                                   | 605.2193375                                      |
| 0.024027775                        | 1                                               | 0.016286099                        | 1                                   | 264.0507177                                      |
| 0.015246585                        | 1                                               | 0.015234593                        | 1                                   | 276.1513261                                      |
| 0.037315351                        | 1                                               | 0.032450956                        | 1                                   | 238.1589041                                      |
| 0.042633747                        | 0.994152097                                     | 0.033196262                        | 1.008797654                         | 146.1678886                                      |
| 0.009196339                        | 0.998472117                                     | 0.007652577                        | 1.002293578                         | 455.9298547                                      |
| 0.004851327                        | 0.991463098                                     | 0.004633873                        | 1.012860483                         | 519.8042673                                      |
| 0.013043123                        | 1                                               | 0.011200097                        | 1                                   | 357.489842                                       |
| 0.007343962                        | 0.996542793                                     | 0.006875736                        | 1.005194805                         | 443.4648268                                      |
| 0.016593198                        | 0.995172997                                     | 0.011485962                        | 1.007258065                         | 375.5993952                                      |
| 0.01121859                         | 1                                               | 0.009730724                        | 1                                   | 453.2803667                                      |
| 0.020948107                        | 1                                               | 0.018064557                        | 1                                   | 397.8931116                                      |
| 0.022009932                        | 1                                               | 0.017955919                        | 1                                   | 240.9193084                                      |
| 0.023358051                        | 0.997555016                                     | 0.013417759                        | 1.003671971                         | 282.6813035                                      |

| original_gldzm_LowIntensityLargeDistanceEmphasis | original_gldzm_HighIntensityEmphasis | original_gldzm_DistanceZoneVariability | original_gldzm_ZonePercentage | original_gldzm_IntensityVariabilityNormalized |
|--------------------------------------------------|--------------------------------------|----------------------------------------|-------------------------------|-----------------------------------------------|
| 0.007572563                                      | 550.4490146                          | 1159.027421                            | 0.549952875                   | 0.030219056                                   |
| 0.052433364                                      | 146.0430464                          | 302                                    | 0.322994652                   | 0.05515109                                    |
| 0.019139562                                      | 327.1149897                          | 487                                    | 0.317470665                   | 0.038609599                                   |
| 0.007942404                                      | 533.4389671                          | 426                                    | 0.436028659                   | 0.033040182                                   |
| 0.026507058                                      | 254.0354746                          | 1043                                   | 0.440456081                   | 0.039995441                                   |
| 0.019074081                                      | 258.9903537                          | 311                                    | 0.471212121                   | 0.044612856                                   |
| 0.007844966                                      | 444.6523038                          | 2326.069113                            | 0.414793842                   | 0.032961217                                   |
| 0.006095612                                      | 388.804361                           | 1649.001211                            | 0.323218481                   | 0.043108429                                   |
| 0.011857323                                      | 370.4762362                          | 2081.00096                             | 0.458205015                   | 0.034877361                                   |
| 0.022346212                                      | 291.8245614                          | 513                                    | 0.478544776                   | 0.039088895                                   |
| 0.011244806                                      | 323.4379458                          | 701                                    | 0.464854111                   | 0.037800086                                   |
| 0.00553081                                       | 440.1505484                          | 995.0319043                            | 0.435140998                   | 0.04022131                                    |
| 0.039434273                                      | 190.1902552                          | 431                                    | 0.230851634                   | 0.0585645                                     |
| 0.014879171                                      | 358.4520167                          | 719                                    | 0.41875364                    | 0.039413031                                   |
| 0.009297049                                      | 410.2972973                          | 851                                    | 0.428931452                   | 0.037275563                                   |
| 0.011007926                                      | 395.2338377                          | 1454                                   | 0.33226691                    | 0.039121789                                   |
| 0.006262568                                      | 519.7694754                          | 629                                    | 0.52680067                    | 0.036181791                                   |
| 0.051619394                                      | 199.9183099                          | 355                                    | 0.287915653                   | 0.04718905                                    |
| 0.008484825                                      | 321.9906542                          | 535                                    | 0.412127573                   | 0.044150581                                   |
| 0.005744262                                      | 424.0658492                          | 2194.014532                            | 0.423542989                   | 0.037767664                                   |
| 0.026987638                                      | 191.5819277                          | 830                                    | 0.274470899                   | 0.050837567                                   |
| 0.012417016                                      | 268.411215                           | 535                                    | 0.495829472                   | 0.043857105                                   |
| 0.028999218                                      | 246.2184466                          | 412                                    | 0.40234375                    | 0.043418324                                   |
| 0.010993479                                      | 414.9647651                          | 1190.001678                            | 0.450321118                   | 0.031621605                                   |
| 0.024932587                                      | 242.1723356                          | 441                                    | 0.346425766                   | 0.048698845                                   |
| 0.007497496                                      | 473.4682081                          | 1211                                   | 0.511186154                   | 0.032904404                                   |
| 0.00538695                                       | 574.9041005                          | 1512                                   | 0.46767708                    | 0.034211318                                   |
| 0.012181309                                      | 338.0242424                          | 1155                                   | 0.418175235                   | 0.03805251                                    |
| 0.019594553                                      | 288.2765152                          | 264                                    | 0.590604027                   | 0.045884986                                   |
| 0.035532934                                      | 174.8606658                          | 811                                    | 0.394839338                   | 0.049685201                                   |
| 0.006639938                                      | 415.4760479                          | 1670                                   | 0.35098781                    | 0.039477213                                   |
| 0.038246841                                      | 253.0126761                          | 708.0028169                            | 0.343160947                   | 0.042110692                                   |
| 0.011612846                                      | 457.6561625                          | 1422.012605                            | 0.44224218                    | 0.032067729                                   |
| 0.014825422                                      | 395.5965116                          | 860                                    | 0.365957447                   | 0.035408329                                   |
| 0.007084596                                      | 380.565348                           | 1987.025038                            | 0.453451408                   | 0.040009188                                   |
| 0.012783248                                      | 282.485447                           | 960.002079                             | 0.320773591                   | 0.047164388                                   |
| 0.018101863                                      | 372.0917874                          | 1242                                   | 0.333781242                   | 0.04066606                                    |
| 0.01526542                                       | 502.9536528                          | 1271.001571                            | 0.246657624                   | 0.035638363                                   |
| 0.010999176                                      | 377.2041522                          | 578                                    | 0.469918699                   | 0.034392548                                   |
| 0.006125771                                      | 576.4027149                          | 3528.00905                             | 0.486382393                   | 0.028004616                                   |
| 0.008171017                                      | 395.8631476                          | 1023                                   | 0.394371627                   | 0.039311859                                   |
| 0.005545846                                      | 754.1493776                          | 2402.013278                            | 0.623222136                   | 0.02752673                                    |
| 0.015983901                                      | 354.3622829                          | 1610.001241                            | 0.441281139                   | 0.035653812                                   |
| 0.008054556                                      | 505.6835148                          | 1284.001555                            | 0.516881029                   | 0.031717334                                   |
| 0.024509061                                      | 206.693609                           | 532                                    | 0.41627543                    | 0.046427158                                   |
| 0.006848083                                      | 463.2686688                          | 1232                                   | 0.448816029                   | 0.034720758                                   |
| 0.005699758                                      | 448.0041929                          | 1904.004193                            | 0.418237615                   | 0.036525564                                   |
| 0.011602421                                      | 284.3709677                          | 372                                    | 0.427095293                   | 0.045872355                                   |
| 0.019194047                                      | 285.4263736                          | 455                                    | 0.5346651                     | 0.038473614                                   |
| 0.01267883                                       | 249.0074074                          | 405                                    | 0.299556213                   | 0.055217193                                   |
| 0.011849709                                      | 315.9265487                          | 1128.00177                             | 0.439859868                   | 0.041444122                                   |
| 0.005002604                                      | 638.4119418                          | 1989.004014                            | 0.591219223                   | 0.028398189                                   |
| 0.005091156                                      | 453.0436165                          | 2199.000909                            | 0.487810284                   | 0.036943061                                   |
| 0.02457278                                       | 294.544086                           | 465                                    | 0.421195652                   | 0.039574517                                   |
| 0.023752072                                      | 251.575188                           | 532                                    | 0.4                           | 0.041233252                                   |
| 0.015373414                                      | 245.1889862                          | 799                                    | 0.40974359                    | 0.04534924                                    |
| 0.016534705                                      | 358.8531541                          | 1924.025853                            | 0.478121137                   | 0.033743847                                   |
| 0.00694446                                       | 522.8498113                          | 1325                                   | 0.383169462                   | 0.034338199                                   |
| 0.010026243                                      | 350.2297818                          | 779                                    | 0.472694175                   | 0.040285766                                   |
| 0.00423364                                       | 765.9848751                          | 4548.021482                            | 0.499726147                   | 0.024962805                                   |
| 0.010103633                                      | 335.3553719                          | 605                                    | 0.342582106                   | 0.042289461                                   |
| 0.019550785                                      | 297.0722997                          | 1148                                   | 0.429962547                   | 0.039084789                                   |
| 0.010344011                                      | 340.1009595                          | 2371.14101                             | 0.41406115                    | 0.038041746                                   |
| 0.005941895                                      | 491.3152276                          | 3133.42449                             | 0.417814509                   | 0.033912788                                   |
| 0.010239744                                      | 272.3878205                          | 312                                    | 0.394936709                   | 0.05138478                                    |
| 0.017810857                                      | 258.375975                           | 1272.039002                            | 0.331952356                   | 0.046884621                                   |
| 0.01375004                                       | 305.9594883                          | 469                                    | 0.359662577                   | 0.043421334                                   |
| 0.007272825                                      | 467.6018904                          | 2625.075614                            | 0.4232                        | 0.034361369                                   |
| 0.005419373                                      | 728.4085526                          | 3040                                   | 0.51903705                    | 0.028088643                                   |
| 0.015496771                                      | 248.2732068                          | 948                                    | 0.327122153                   | 0.0458794                                     |
| 0.0279653                                        | 253.5357873                          | 489                                    | 0.376443418                   | 0.041455999                                   |
| 0.006496702                                      | 398.9569414                          | 1335.053452                            | 0.313986014                   | 0.048054766                                   |
| 0.005926907                                      | 479.1939121                          | 887                                    | 0.389205792                   | 0.03751673                                    |
| 0.005474432                                      | 589.7782194                          | 1258                                   | 0.556883577                   | 0.0290959                                     |
| 0.009551707                                      | 484.8964307                          | 1697.04213                             | 0.545832003                   | 0.029081916                                   |
| 0.012473519                                      | 348.0286145                          | 664                                    | 0.494783905                   | 0.03764153                                    |
| 0.009468043                                      | 304.7805405                          | 925                                    | 0.3860601                     | 0.042594595                                   |
| 0.018673318                                      | 202.809816                           | 326                                    | 0.340292276                   | 0.055854567                                   |
| 0.025882393                                      | 242.5536649                          | 762.0026178                            | 0.447568834                   | 0.041634687                                   |
| 0.006745532                                      | 677.7995227                          | 1257                                   | 0.537409149                   | 0.025515031                                   |
| 0.007864473                                      | 527.3355019                          | 1076                                   | 0.540975365                   | 0.031202927                                   |
| 0.01441374                                       | 370.9291339                          | 762                                    | 0.423568649                   | 0.036872852                                   |
| 0.014555168                                      | 401.9921027                          | 1011.001974                            | 0.309880697                   | 0.039781946                                   |
| 0.007596636                                      | 368.9809306                          | 1311                                   | 0.426618939                   | 0.037778674                                   |
| 0.006732243                                      | 475.0862813                          | 1157.001726                            | 0.475194752                   | 0.033112208                                   |
| 0.023802297                                      | 134.1101449                          | 345                                    | 0.225195822                   | 0.070413779                                   |
| 0.006345972                                      | 605.2193375                          | 1117                                   | 0.468343816                   | 0.027682379                                   |
| 0.016286099                                      | 264.0507177                          | 1045                                   | 0.38110868                    | 0.043331426                                   |
| 0.015234593                                      | 276.1513261                          | 641                                    | 0.43784153                    | 0.041143299                                   |
| 0.032450956                                      | 238.1589041                          | 730                                    | 0.360493827                   | 0.043918184                                   |
| 0.033304875                                      | 146.3460411                          | 339.0058651                            | 0.261503067                   | 0.072625794                                   |
| 0.007656247                                      | 456.2882263                          | 1306.001529                            | 0.549118388                   | 0.031620281                                   |
| 0.004682162                                      | 521.1742011                          | 2544.09431                             | 0.495080069                   | 0.03568428                                    |
| 0.011200097                                      | 357.489842                           | 1329                                   | 0.402727273                   | 0.038412085                                   |
| 0.00690779                                       | 444.3229437                          | 2302.013853                            | 0.530790441                   | 0.033380559                                   |
| 0.0115177                                        | 376.1080645                          | 1234.014516                            | 0.362361192                   | 0.039146722                                   |
| 0.009730724                                      | 453.2803667                          | 1309                                   | 0.464678736                   | 0.03165661                                    |
| 0.018064557                                      | 397.8931116                          | 421                                    | 0.402101242                   | 0.037333348                                   |
| 0.017955919                                      | 240.9193084                          | 347                                    | 0.416067146                   | 0.042446993                                   |
| 0.013431289                                      | 282.9736842                          | 1630.004896                            | 0.282992726                   | 0.044764783                                   |

| original_gldzm_LowIntensitySmallDistanceEmphasis | original_gldzm_IntensityVariability | original_gldzm_HighIntensityLargeDistanceEmphasis | original_gldzm_SmallDistanceEmphasis | original_gldzm_SumVariance |
|--------------------------------------------------|-------------------------------------|---------------------------------------------------|--------------------------------------|----------------------------|
| 0.007533019                                      | 35.26563839                         | 556.4387318                                       | 0.997429306                          | 1178.427772                |
| 0.052433364                                      | 16.65562914                         | 146.0430464                                       | 1                                    | 131.6877553                |
| 0.019139562                                      | 18.80287474                         | 327.1149897                                       | 1                                    | 398.4743274                |
| 0.007942404                                      | 14.07511737                         | 533.4389671                                       | 1                                    | 1266.825313                |
| 0.026507058                                      | 41.71524449                         | 254.0354746                                       | 1                                    | 345.026917                 |
| 0.019074081                                      | 13.87459807                         | 258.9903537                                       | 1                                    | 436.4000221                |
| 0.007765014                                      | 77.26109215                         | 450.7329352                                       | 0.997120307                          | 816.5995878                |
| 0.006091669                                      | 71.17201696                         | 389.8509994                                       | 0.99954573                           | 582.339046                 |
| 0.011785312                                      | 72.64954393                         | 370.512242                                        | 0.999639942                          | 795.664849                 |
| 0.022346212                                      | 20.05263158                         | 291.8245614                                       | 1                                    | 442.8009819                |
| 0.011244806                                      | 26.4978602                          | 323.4379458                                       | 1                                    | 568.2780906                |
| 0.005503303                                      | 40.34197408                         | 451.001994                                        | 0.997008973                          | 791.8986336                |
| 0.039434273                                      | 25.2412993                          | 190.1902552                                       | 1                                    | 162.9607538                |
| 0.014879171                                      | 28.3379694                          | 358.4520167                                       | 1                                    | 569.6982802                |
| 0.009297049                                      | 31.72150411                         | 410.2972973                                       | 1                                    | 660.4093309                |
| 0.011007926                                      | 56.88308116                         | 395.2338377                                       | 1                                    | 648.9919664                |
| 0.006262568                                      | 22.75834658                         | 519.7694754                                       | 1                                    | 1400.386338                |
| 0.051619394                                      | 16.75211268                         | 199.9183099                                       | 1                                    | 164.2550405                |
| 0.008484825                                      | 23.62056075                         | 321.9906542                                       | 1                                    | 571.8129889                |
| 0.005721176                                      | 83.164396                           | 428.4118983                                       | 0.998637602                          | 811.8915049                |
| 0.026987638                                      | 42.19518072                         | 191.5819277                                       | 1                                    | 199.5760235                |
| 0.012417016                                      | 23.4635514                          | 268.411215                                        | 1                                    | 442.3873631                |
| 0.028999218                                      | 17.88834951                         | 246.2184466                                       | 1                                    | 314.5086259                |
| 0.010986979                                      | 37.69295302                         | 416.1828859                                       | 0.999370805                          | 804.6029312                |
| 0.024932587                                      | 21.47619048                         | 242.1723356                                       | 1                                    | 260.6304341                |
| 0.007497496                                      | 39.84723369                         | 473.4682081                                       | 1                                    | 1134.864357                |
| 0.00538695                                       | 51.72751323                         | 574.9041005                                       | 1                                    | 1249.655755                |
| 0.012181309                                      | 43.95064935                         | 338.0242424                                       | 1                                    | 547.1007627                |
| 0.019594553                                      | 12.11363636                         | 288.2765152                                       | 1                                    | 689.8770896                |
| 0.035532934                                      | 40.2946979                          | 174.8606658                                       | 1                                    | 243.4496158                |
| 0.006639938                                      | 65.92694611                         | 415.4760479                                       | 1                                    | 616.6276744                |
| 0.038139052                                      | 29.89859155                         | 253.2197183                                       | 0.998943662                          | 374.076632                 |
| 0.01150304                                       | 45.79271709                         | 462.8368347                                       | 0.99842437                           | 1128.1298                  |
| 0.014825422                                      | 30.45116279                         | 395.5965116                                       | 1                                    | 653.1591326                |
| 0.007048839                                      | 79.89834752                         | 383.1822734                                       | 0.998122183                          | 736.8329901                |
| 0.012778276                                      | 45.37214137                         | 284.9303534                                       | 0.999220374                          | 362.0419345                |
| 0.018101863                                      | 50.50724638                         | 372.0917874                                       | 1                                    | 511.7546303                |
| 0.015263668                                      | 45.36763551                         | 506.915161                                        | 0.999410841                          | 1521.941861                |
| 0.010999176                                      | 19.87889273                         | 377.2041522                                       | 1                                    | 797.273213                 |
| 0.006116657                                      | 99.02432127                         | 578.6875                                          | 0.999151584                          | 1602.507587                |
| 0.008171017                                      | 40.21603128                         | 395.8631476                                       | 1                                    | 711.9863501                |
| 0.005494439                                      | 66.33941909                         | 755.2497925                                       | 0.998755187                          | 2165.110494                |
| 0.015973562                                      | 57.47394541                         | 354.7810174                                       | 0.999534739                          | 560.9257771                |
| 0.008052536                                      | 40.78849145                         | 509.0520995                                       | 0.999416796                          | 996.8221804                |
| 0.024509061                                      | 24.69924812                         | 206.693609                                        | 1                                    | 274.0841783                |
| 0.006848083                                      | 42.77597403                         | 463.2686688                                       | 1                                    | 782.3342425                |
| 0.005687879                                      | 69.69077568                         | 449.3406709                                       | 0.999213836                          | 827.1605992                |
| 0.011602421                                      | 17.06451613                         | 284.3709677                                       | 1                                    | 572.0144032                |
| 0.019194047                                      | 17.50549451                         | 285.4263736                                       | 1                                    | 598.1587805                |
| 0.01267883                                       | 22.36296296                         | 249.0074074                                       | 1                                    | 328.0987355                |
| 0.011834959                                      | 46.83185841                         | 316.5238938                                       | 0.999336283                          | 527.6902502                |
| 0.00491179                                       | 56.59759157                         | 638.631711                                        | 0.999247366                          | 1549.245395                |
| 0.005083583                                      | 81.31167651                         | 453.3502953                                       | 0.999659246                          | 967.3975875                |
| 0.02457278                                       | 18.40215054                         | 294.544086                                        | 1                                    | 352.6208079                |
| 0.023752072                                      | 21.93609023                         | 251.575188                                        | 1                                    | 310.5386689                |
| 0.015373414                                      | 36.23404255                         | 245.1889862                                       | 1                                    | 413.9219577                |
| 0.016416388                                      | 65.26059979                         | 362.0765253                                       | 0.998061013                          | 655.2849883                |
| 0.00694446                                       | 45.49811321                         | 522.8498113                                       | 1                                    | 1015.7132                  |
| 0.010026243                                      | 31.38254172                         | 350.2297818                                       | 1                                    | 616.3749472                |
| 0.00422478                                       | 113.8803157                         | 769.3176238                                       | 0.998849189                          | 2557.047234                |
| 0.010103633                                      | 25.58512397                         | 335.3553719                                       | 1                                    | 449.7529066                |
| 0.019550785                                      | 44.86933798                         | 297.0722997                                       | 1                                    | 438.882529                 |
| 0.010196403                                      | 91.18606592                         | 348.2361285                                       | 0.995932416                          | 498.663536                 |
| 0.005871468                                      | 108.010989                          | 507.9070644                                       | 0.993877551                          | 1048.475696                |
| 0.010239744                                      | 16.03205128                         | 272.3878205                                       | 1                                    | 503.2288967                |
| 0.017472276                                      | 60.10608424                         | 267.8346334                                       | 0.997074883                          | 354.6023575                |
| 0.01375004                                       | 20.36460554                         | 305.9594883                                       | 1                                    | 491.1880387                |
| 0.007234905                                      | 90.88582231                         | 475.2476371                                       | 0.997164461                          | 929.7918803                |
| 0.005419373                                      | 85.38947368                         | 728.4085526                                       | 1                                    | 1215.683355                |
| 0.015496771                                      | 43.49367089                         | 248.2732068                                       | 1                                    | 310.9302793                |
| 0.0279653                                        | 20.27198364                         | 253.5357873                                       | 1                                    | 386.7246737                |
| 0.006418724                                      | 64.72976986                         | 403.199703                                        | 0.996659243                          | 569.3010856                |
| 0.005926907                                      | 33.27733935                         | 479.1939121                                       | 1                                    | 871.8337577                |
| 0.005474432                                      | 37.62162162                         | 589.7782194                                       | 1                                    | 1370.870345                |
| 0.008948296                                      | 49.70099473                         | 487.4277355                                       | 0.997366881                          | 1130.091398                |
| 0.012473519                                      | 24.9939759                          | 348.0286145                                       | 1                                    | 718.1672984                |
| 0.009468043                                      | 39.4                                | 304.7805405                                       | 1                                    | 529.6024382                |
| 0.018673318                                      | 18.20858896                         | 202.809816                                        | 1                                    | 279.3304619                |
| 0.025860578                                      | 31.80890052                         | 243.4371728                                       | 0.999018325                          | 363.3629985                |
| 0.006745532                                      | 32.07239459                         | 677.7995227                                       | 1                                    | 1887.54239                 |
| 0.007864473                                      | 33.57434944                         | 527.3355019                                       | 1                                    | 1155.489773                |
| 0.01441374                                       | 28.09711286                         | 370.9291339                                       | 1                                    | 694.1129294                |
| 0.014497326                                      | 40.29911155                         | 402.1816387                                       | 0.999259625                          | 674.2030455                |
| 0.007596636                                      | 49.52784134                         | 368.9809306                                       | 1                                    | 873.896173                 |
| 0.006727804                                      | 38.37704918                         | 476.9732528                                       | 0.99935289                           | 983.7289644                |
| 0.023802297                                      | 24.29275362                         | 134.1101449                                       | 1                                    | 116.6908829                |
| 0.006345972                                      | 30.92121755                         | 605.2193375                                       | 1                                    | 1242.896029                |
| 0.016286099                                      | 45.28133971                         | 264.0507177                                       | 1                                    | 323.4423601                |
| 0.015234593                                      | 26.37285491                         | 276.1513261                                       | 1                                    | 484.7263091                |
| 0.032450956                                      | 32.06027397                         | 238.1589041                                       | 1                                    | 308.8742612                |
| 0.033169109                                      | 24.76539589                         | 147.058651                                        | 0.997800587                          | 106.4105699                |
| 0.007651659                                      | 41.35932722                         | 457.7217125                                       | 0.999426606                          | 1064.634741                |
| 0.0046218                                        | 91.56586126                         | 526.6539361                                       | 0.996784879                          | 1191.520319                |
| 0.011200097                                      | 51.0496614                          | 357.489842                                        | 1                                    | 596.2231392                |
| 0.006867722                                      | 77.10909091                         | 447.7554113                                       | 0.998701299                          | 1067.899977                |
| 0.011478028                                      | 48.54193548                         | 378.1427419                                       | 0.998185484                          | 540.2866343                |
| 0.009730724                                      | 41.43850267                         | 453.2803667                                       | 1                                    | 1043.685256                |
| 0.018064557                                      | 15.71733967                         | 397.8931116                                       | 1                                    | 769.2101112                |
| 0.017955919                                      | 14.72910663                         | 240.9193084                                       | 1                                    | 393.0071201                |
| 0.013414376                                      | 73.14565483                         | 284.1432069                                       | 0.999082007                          | 256.1450898                |









| original_firstorder_Energy | original_firstorder_RobustMeanAbsoluteDeviation | original_firstorder_Median | original_firstorder_TotalEnergy | original_firstorder_Maximum | original_firstorder_RootMeanSquared |
|----------------------------|-------------------------------------------------|----------------------------|---------------------------------|-----------------------------|-------------------------------------|
| 1029934195                 | 130.8587368                                     | -748.5                     | 27808223265                     | 329                         | 696.6779239                         |
| 497612463                  | 45.47283911                                     | -761                       | 13435536501                     | -130                        | 729.5243949                         |
| 926069537                  | 82.49312194                                     | -789                       | 25003877499                     | 55                          | 776.9787109                         |
| 336872933                  | 156.139727                                      | -641                       | 9095569191                      | 215                         | 587.1996351                         |
| 1051090436                 | 86.18193785                                     | -705                       | 28379441772                     | 356                         | 666.2376831                         |
| 359243497                  | 67.14269135                                     | -766                       | 9699574419                      | -43                         | 737.7725454                         |
| 2722472841                 | 125.6752239                                     | -718                       | 73506766707                     | 74                          | 694.0953331                         |
| 2676475732                 | 59.2333714                                      | -760                       | 72264844764                     | 190                         | 729.8627205                         |
| 1589741462                 | 123.8849194                                     | -636                       | 42923019474                     | 241                         | 591.3553564                         |
| 470909054                  | 92.51719997                                     | -697                       | 12714544458                     | 140                         | 662.7826446                         |
| 441493194                  | 107.5592986                                     | -573                       | 11920316238                     | 39                          | 541.0798185                         |
| 962328800                  | 78.29278165                                     | -679                       | 25982877600                     | 156                         | 646.1394784                         |
| 1158694179                 | 30.49562462                                     | -815                       | 31284742833                     | 31                          | 787.7932469                         |
| 913016275                  | 79.43630704                                     | -773                       | 24651439425                     | 335                         | 729.2125124                         |
| 979096185                  | 84.36174592                                     | -751                       | 26435596995                     | 96                          | 702.492748                          |
| 2440785638                 | 83.70720627                                     | -804                       | 659012122226                    | 158                         | 746.8375798                         |
| 256864450                  | 95.59644658                                     | -461                       | 6935340150                      | 301                         | 463.820391                          |
| 645971755                  | 46.71577929                                     | -753                       | 17441237385                     | 16                          | 723.8110787                         |
| 480609062                  | 69.63830696                                     | -632                       | 12976444674                     | -67                         | 608.4972662                         |
| 2346928852                 | 92.32743356                                     | -710                       | 63367079004                     | 259                         | 671.8774315                         |
| 1546265239                 | 51.77636031                                     | -748                       | 41749161453                     | 27                          | 715.0741902                         |
| 389210226                  | 77.84249658                                     | -621                       | 10508676102                     | 1                           | 600.5945664                         |
| 502183260                  | 74.38255988                                     | -744                       | 13558948020                     | 63                          | 700.2951805                         |
| 954285048                  | 130.9880494                                     | -617                       | 25765696296                     | 66                          | 600.4295931                         |
| 874223586                  | 53.67091502                                     | -865                       | 23604036822                     | 106                         | 828.6994638                         |
| 742268823                  | 121.0016552                                     | -558                       | 20041258221                     | 244                         | 559.7551261                         |
| 1345574673                 | 102.266568                                      | -678                       | 36330516171                     | 314                         | 645.1356622                         |
| 1061599299                 | 79.28129759                                     | -650                       | 28663181073                     | 204                         | 619.966859                          |
| 137146812                  | 78.57020455                                     | -543                       | 3702963924                      | -40                         | 553.9098611                         |
| 819568130                  | 65.57310568                                     | -650                       | 22128339510                     | 122                         | 631.6729962                         |
| 2336195215                 | 75.82479843                                     | -743                       | 63077270805                     | 253                         | 700.7165034                         |
| 1077267526                 | 67.04857971                                     | -767                       | 29086223202                     | 86                          | 721.575101                          |
| 1090105856                 | 159.9914634                                     | -630                       | 29432858112                     | 214                         | 581.0323509                         |
| 1003526339                 | 95.92000878                                     | -705                       | 27095211153                     | 199                         | 653.4772258                         |
| 1579630705                 | 87.60083939                                     | -627                       | 42650029035                     | 209                         | 598.8997452                         |
| 1806217550                 | 50.5395721                                      | -813                       | 48767873850                     | 68                          | 776.0626743                         |
| 2581029753                 | 60.7612813                                      | -877                       | 69687803331                     | 318                         | 832.8497706                         |
| 2694891583                 | 263.3425773                                     | -831                       | 72762072741                     | 213                         | 722.6095875                         |
| 319651592                  | 119.4680023                                     | -495                       | 8630592984                      | 176                         | 509.7836238                         |
| 2273982023                 | 172.2316487                                     | -545.5                     | 61397514621                     | 92                          | 559.2761611                         |
| 1298568213                 | 88.52603701                                     | -756.5                     | 35061341751                     | 98                          | 707.5341363                         |
| 759456688                  | 162.7784375                                     | -357                       | 20505330576                     | 259                         | 443.1639447                         |
| 1678113235                 | 97.99274713                                     | -713                       | 45309057345                     | 274                         | 677.7753894                         |
| 1039157429                 | 116.2830791                                     | -683                       | 28057250583                     | 346                         | 646.2722158                         |
| 620149573                  | 69.98708007                                     | -728                       | 16744038471                     | -5                          | 696.5989213                         |
| 1318715008                 | 97.55837697                                     | -737                       | 35605305216                     | 190                         | 693.1134077                         |
| 1900143488                 | 98.5953698                                      | -680                       | 51303874176                     | 171                         | 645.3800827                         |
| 321174719                  | 73.04702877                                     | -618                       | 8671717413                      | -103                        | 607.2417161                         |
| 211672165                  | 104.0703812                                     | -500                       | 5715148455                      | 219                         | 498.7318407                         |
| 632464230                  | 38.85361537                                     | -705                       | 17076534210                     | 179                         | 683.9583223                         |
| 1443332636                 | 72.31431432                                     | -785                       | 38969981172                     | 187                         | 749.5509583                         |
| 1053100245                 | 146.8080748                                     | -545                       | 28433706615                     | 436                         | 558.9275034                         |
| 1401479389                 | 96.65716303                                     | -571                       | 37839943503                     | 77                          | 557.3253688                         |
| 665530930                  | 75.96017643                                     | -821                       | 17969335110                     | 27                          | 776.4251331                         |
| 672845200                  | 74.26825924                                     | -745.5                     | 18166820400                     | 26                          | 711.2655247                         |
| 828960339                  | 66.98326929                                     | -676                       | 22381929153                     | 129                         | 652.0029648                         |
| 1458728770                 | 117.3494825                                     | -629                       | 39385676790                     | 232                         | 600.5207402                         |
| 1671717504                 | 82.67413103                                     | -733                       | 45136372608                     | 300                         | 695.2947505                         |
| 690991279                  | 76.40103546                                     | -674.5                     | 18656764533                     | 204                         | 647.526698                          |
| 2071696559                 | 214.429615                                      | -379                       | 55935807093                     | 290                         | 476.37775                           |
| 955082276                  | 61.75126879                                     | -772                       | 25787221452                     | 221                         | 735.4024006                         |
| 1525530222                 | 77.58361217                                     | -792                       | 41189315994                     | 190                         | 755.8833466                         |
| 2749178677                 | 82.00990031                                     | -730                       | 74227824279                     | 164                         | 689.1277025                         |
| 3431839892                 | 104.5413954                                     | -671                       | 92659677084                     | 247                         | 670.966055                          |
| 354600276                  | 55.45469928                                     | -685.5                     | 9574207452                      | 27                          | 669.9709761                         |
| 2533511998                 | 58.86476514                                     | -843                       | 68404823946                     | 48                          | 809.9446628                         |
| 701595502                  | 55.43642682                                     | -763.5                     | 18943078554                     | 253                         | 733.5075735                         |
| 2740863566                 | 114.4397946                                     | -700                       | 74003316282                     | 307                         | 662.2221459                         |
| 1968953270                 | 141.1990854                                     | -597                       | 53161738290                     | 964                         | 579.8025118                         |
| 1226632065                 | 53.46279874                                     | -672                       | 33119065755                     | 253                         | 650.5908725                         |
| 560204996                  | 79.34088018                                     | -705                       | 15125534892                     | 110                         | 656.7028684                         |
| 2423488088                 | 49.94607035                                     | -788                       | 65434178376                     | 246                         | 751.6087002                         |
| 1115420466                 | 85.21681454                                     | -743                       | 30116352582                     | 113                         | 699.5957166                         |
| 630920586                  | 144.5112158                                     | -547                       | 17034855822                     | 284                         | 528.4808241                         |
| 1117323558                 | 148.0731938                                     | -600                       | 30167736066                     | 322                         | 597.3762386                         |
| 446517006                  | 98.43495833                                     | -596                       | 12055959162                     | 122                         | 576.8232327                         |
| 864978871                  | 81.21091037                                     | -623                       | 23354429517                     | 115                         | 600.8406989                         |
| 635010447                  | 45.64660482                                     | -841.5                     | 17145282069                     | -10                         | 814.1560989                         |
| 819101688                  | 82.65448273                                     | -728                       | 22115745576                     | 313                         | 692.7111049                         |
| 736396076                  | 193.7866565                                     | -541                       | 19882694052                     | 275                         | 561.1004563                         |
| 986421624                  | 126.6150355                                     | -757                       | 26633838348                     | 372                         | 704.2289923                         |
| 776440644                  | 92.58713656                                     | -705                       | 20963897388                     | 118                         | 656.959427                          |
| 1604542426                 | 106.4298018                                     | -763                       | 43322645502                     | 485                         | 700.5967884                         |
| 1102523932                 | 112.1754841                                     | -607                       | 29768146164                     | 49                          | 598.9805669                         |
| 999944021                  | 117.3516034                                     | -689                       | 26998488567                     | 99                          | 640.297703                          |
| 916352931                  | 30.73339376                                     | -796                       | 24741529137                     | -147                        | 773.3961468                         |
| 852548665                  | 162.3597681                                     | -639                       | 23018813955                     | 251                         | 597.8818885                         |
| 1359804097                 | 70.52241117                                     | -739                       | 36714710619                     | 11                          | 704.2136639                         |
| 578547489                  | 87.36987234                                     | -659                       | 15620782203                     | 53                          | 628.6355948                         |
| 937584539                  | 65.79808947                                     | -712                       | 25314782553                     | 216                         | 680.4444949                         |
| 846349725                  | 30.96440223                                     | -831                       | 22851442575                     | -34                         | 805.630933                          |
| 714751566                  | 152.6403125                                     | -561                       | 19298292282                     | 148                         | 547.7806401                         |
| 1788591524                 | 91.86167177                                     | -611                       | 48291971148                     | 284                         | 587.441981                          |
| 1441441840                 | 86.49172913                                     | -697                       | 38918929680                     | 92                          | 690.9088875                         |
| 875999515                  | 119.8139952                                     | -433                       | 23651986905                     | 205                         | 448.6498114                         |
| 1824630722                 | 69.97961568                                     | -775                       | 49265029494                     | 302                         | 730.2095169                         |
| 1074172329                 | 134.1761726                                     | -639                       | 29002652883                     | 148                         | 617.509377                          |
| 583551233                  | 88.83257937                                     | -802                       | 15755883291                     | 231                         | 746.5624712                         |
| 236007973                  | 79.93984117                                     | -546                       | 6372215271                      | 7                           | 531.9616349                         |
| 3224592405                 | 49.47482393                                     | -781                       | 87063994935                     | 423                         | 747.3069541                         |



| original_firstorder_90Percentile | original_firstorder_Minimum | original_firstorder_Entropy | original_firstorder_StandardDeviation | original_firstorder_Range | original_firstorder_Variance | original_firstorder_10Percentile |
|----------------------------------|-----------------------------|-----------------------------|---------------------------------------|---------------------------|------------------------------|----------------------------------|
| -197                             | -1034                       | 4.92575119                  | 275.9316066                           | 1363                      | 76138.25153                  | -873.9                           |
| -574.4                           | -867                        | 3.704223243                 | 122.1045102                           | 737                       | 14909.51141                  | -816                             |
| -513.3                           | -1000                       | 4.469157532                 | 186.9461869                           | 1055                      | 34948.87679                  | -962                             |
| -13.4                            | -933                        | 4.661246217                 | 266.2656979                           | 1148                      | 70897.42188                  | -749.4                           |
| -377.7                           | -861                        | 4.383525213                 | 182.0141496                           | 1217                      | 33129.15066                  | -798.3                           |
| -519.9                           | -980                        | 4.272871428                 | 157.3741082                           | 937                       | 24766.60994                  | -861                             |
| -349                             | -1012                       | 4.841428897                 | 211.0247715                           | 1086                      | 44531.45417                  | -879                             |
| -497                             | -1005                       | 4.030833293                 | 164.1595977                           | 1195                      | 26948.37352                  | -829                             |
| -118                             | -894                        | 4.741842405                 | 232.0330699                           | 1135                      | 53839.34555                  | -753                             |
| -347.2                           | -890                        | 4.561883247                 | 201.2938544                           | 1030                      | 40519.21583                  | -812                             |
| -163.4                           | -819                        | 4.558496148                 | 194.2636133                           | 858                       | 37738.35144                  | -691.3                           |
| -382.4                           | -982                        | 4.394941157                 | 175.3332309                           | 1138                      | 30741.74187                  | -777                             |
| -664.2                           | -923                        | 3.359154235                 | 135.9152558                           | 954                       | 18472.95676                  | -859                             |
| -412.2                           | -961                        | 4.400375184                 | 220.8457403                           | 1296                      | 48772.84103                  | -861                             |
| -342.5                           | -993                        | 4.367279664                 | 205.6633909                           | 1089                      | 42297.43035                  | -832                             |
| -310.5                           | -977                        | 4.180948175                 | 241.7384297                           | 1135                      | 58437.46839                  | -873                             |
| -77                              | -887                        | 4.85450138                  | 211.0866834                           | 1188                      | 44557.58793                  | -630                             |
| -536.2                           | -875                        | 3.809396588                 | 136.0792274                           | 891                       | 18517.55613                  | -818                             |
| -397.4                           | -924                        | 4.281259665                 | 144.3872279                           | 857                       | 20847.67159                  | -729.3                           |
| -368.8                           | -1006                       | 4.523904118                 | 183.8208433                           | 1265                      | 33790.10245                  | -811                             |
| -531                             | -859                        | 3.850355846                 | 141.323401                            | 886                       | 19972.28646                  | -810                             |
| -362.4                           | -851                        | 4.393381493                 | 151.8381575                           | 852                       | 23054.82607                  | -735                             |
| -423.6                           | -895                        | 4.231188057                 | 175.4639667                           | 958                       | 30787.60362                  | -820.7                           |
| -172.6                           | -917                        | 4.929719676                 | 231.1505219                           | 983                       | 53430.56379                  | -801.4                           |
| -637                             | -1024                       | 3.932023418                 | 158.9708399                           | 1130                      | 25271.72794                  | -931                             |
| -225                             | -947                        | 4.96745179                  | 217.3739326                           | 1191                      | 47251.42659                  | -753                             |
| -258.2                           | -1028                       | 4.777823987                 | 236.8751191                           | 1342                      | 56109.82206                  | -801                             |
| -339.1                           | -900                        | 4.466871023                 | 184.5579609                           | 1104                      | 34061.64092                  | -751.9                           |
| -348.8                           | -891                        | 4.479463327                 | 141.1145142                           | 851                       | 19913.30611                  | -703.4                           |
| -436                             | -824                        | 4.188273881                 | 135.703684                            | 946                       | 18415.48985                  | -752                             |
| -415.4                           | -988                        | 4.229841048                 | 181.4579839                           | 1241                      | 32926.99992                  | -819                             |
| -440.8                           | -896                        | 4.084967055                 | 190.727728                            | 982                       | 36377.06621                  | -833                             |
| 54.2                             | -883                        | 4.811412433                 | 287.1890616                           | 1097                      | 82477.55708                  | -752                             |
| -207.7                           | -883                        | 4.4754595                   | 240.7224147                           | 1082                      | 57947.28092                  | -791                             |
| -319.3                           | -915                        | 4.551564273                 | 183.5329522                           | 1124                      | 33684.34455                  | -743                             |
| -576.8                           | -986                        | 3.872150055                 | 164.5915356                           | 1054                      | 27090.37361                  | -873                             |
| -572                             | -1035                       | 4.151612556                 | 223.656306                            | 1353                      | 50022.14321                  | -948                             |
| 49                               | -995                        | 4.201717415                 | 380.8722592                           | 1208                      | 145063.6778                  | -903                             |
| -179.9                           | -845                        | 4.881504138                 | 196.842467                            | 1021                      | 38746.9568                   | -712                             |
| -42                              | -976                        | 5.229163032                 | 270.3135353                           | 1068                      | 73069.40735                  | -817                             |
| -352.3                           | -990                        | 4.410059573                 | 213.9362217                           | 1088                      | 45768.70696                  | -842                             |
| -15.6                            | -962                        | 5.33219476                  | 256.2861349                           | 1221                      | 65682.58297                  | -702.8                           |
| -345                             | -943                        | 4.674276476                 | 208.1681927                           | 1217                      | 43333.99646                  | -832.8                           |
| -220                             | -980                        | 4.852006491                 | 240.4732948                           | 1326                      | 57827.40553                  | -814                             |
| -456                             | -886                        | 4.208348421                 | 151.1377119                           | 881                       | 22842.60795                  | -818                             |
| -306.8                           | -1008                       | 4.62355217                  | 219.6067512                           | 1198                      | 48227.12516                  | -844                             |
| -339                             | -980                        | 4.589856149                 | 192.8264688                           | 1151                      | 37182.04709                  | -794                             |
| -414                             | -912                        | 4.318350942                 | 133.2579251                           | 809                       | 17757.67461                  | -738                             |
| -213                             | -774                        | 4.699958202                 | 185.4469284                           | 993                       | 34390.56325                  | -663                             |
| -552                             | -920                        | 3.699436119                 | 119.7754968                           | 1099                      | 14346.16964                  | -763                             |
| -496.8                           | -1006                       | 4.367261836                 | 181.0170816                           | 1193                      | 32767.18382                  | -877                             |
| -151                             | -1018                       | 5.207387176                 | 241.4438589                           | 1454                      | 58295.137                    | -785                             |
| -254                             | -941                        | 4.691206249                 | 178.2709235                           | 1018                      | 31780.52217                  | -720                             |
| -504.3                           | -992                        | 4.329083597                 | 192.2321494                           | 1019                      | 36953.19927                  | -904                             |
| -451.5                           | -905                        | 4.313498756                 | 171.3495879                           | 931                       | 29360.68128                  | -839                             |
| -441                             | -896                        | 4.261508403                 | 150.7034241                           | 1025                      | 22711.52203                  | -772                             |
| -179.4                           | -861                        | 4.808831427                 | 228.8350755                           | 1093                      | 52365.49179                  | -774                             |
| -369                             | -1027                       | 4.573946375                 | 232.9713999                           | 1327                      | 54275.67315                  | -832                             |
| -361.7                           | -944                        | 4.476333659                 | 184.2810592                           | 1148                      | 33959.5088                   | -787                             |
| 34                               | -1010                       | 5.303699858                 | 302.3340587                           | 1300                      | 91405.88303                  | -779                             |
| -517                             | -997                        | 4.09483817                  | 161.1641228                           | 1218                      | 25973.87449                  | -843                             |
| -465.9                           | -999                        | 4.436685954                 | 187.079267                            | 1189                      | 34998.15067                  | -893                             |
| -369.6                           | -929                        | 4.389834317                 | 193.4377087                           | 1093                      | 37418.14715                  | -822                             |
| -338.2                           | -1030                       | 4.919203074                 | 210.6477237                           | 1277                      | 44372.46351                  | -915                             |
| -484.9                           | -959                        | 4.071420728                 | 128.7885277                           | 986                       | 16586.48486                  | -780                             |
| -616.1                           | -1011                       | 4.139445031                 | 166.9970934                           | 1059                      | 27888.0292                   | -922                             |
| -534.3                           | -995                        | 4.115556786                 | 161.8661461                           | 1248                      | 26200.64926                  | -842                             |
| -226.9                           | -1000                       | 4.84177225                  | 241.9387808                           | 1307                      | 58534.37364                  | -832                             |
| 2.4                              | -1000                       | 5.125481637                 | 289.0207442                           | 1964                      | 83532.99055                  | -766                             |
| -465.7                           | -855                        | 4.081467855                 | 141.396906                            | 1108                      | 19993.08504                  | -759                             |
| -304.8                           | -839                        | 4.1963234                   | 201.3844805                           | 949                       | 40555.70897                  | -776                             |
| -555.9                           | -1037                       | 3.869003765                 | 168.8449282                           | 1283                      | 28508.60979                  | -846                             |
| -391.8                           | -1050                       | 4.42269943                  | 197.0586878                           | 1163                      | 38832.12642                  | -833                             |
| -9                               | -922                        | 5.041996311                 | 261.3597845                           | 1206                      | 68308.93697                  | -720                             |
| -173                             | -975                        | 5.104080929                 | 240.6311223                           | 1297                      | 57903.33702                  | -820                             |
| -284.1                           | -882                        | 4.678938634                 | 183.3274869                           | 1004                      | 33608.96745                  | -735                             |
| -360                             | -900                        | 4.412516207                 | 163.0885266                           | 1015                      | 26597.86752                  | -735                             |
| -662.2                           | -1005                       | 3.789817545                 | 128.3462438                           | 995                       | 16472.7583                   | -904                             |
| -416.6                           | -921                        | 4.457600628                 | 178.9992569                           | 1234                      | 32040.73396                  | -831                             |
| 17                               | -991                        | 5.324219914                 | 308.3049533                           | 1266                      | 95051.94424                  | -800                             |
| -197                             | -1034                       | 4.887230462                 | 280.9060993                           | 1406                      | 78908.23663                  | -876                             |
| -285.6                           | -941                        | 4.459135216                 | 211.3041685                           | 1059                      | 44649.45164                  | -787.2                           |
| -87                              | -950                        | 4.253565817                 | 265.2665259                           | 1435                      | 70366.32975                  | -835                             |
| -286                             | -949                        | 4.820195656                 | 194.3301597                           | 998                       | 37764.21097                  | -778                             |
| -207.8                           | -994                        | 4.713968648                 | 229.9407217                           | 1093                      | 52872.73552                  | -798                             |
| -666.2                           | -910                        | 3.198674614                 | 88.58488363                           | 763                       | 7847.281607                  | -835                             |
| -45                              | -933                        | 4.969735716                 | 279.4633347                           | 1184                      | 78099.75545                  | -790                             |
| -455                             | -908                        | 4.228591566                 | 162.0450573                           | 919                       | 26258.60061                  | -822                             |
| -353.3                           | -896                        | 4.434901984                 | 165.6623758                           | 949                       | 27444.02276                  | -767                             |
| -456.4                           | -868                        | 4.21193509                  | 169.7569734                           | 1084                      | 28817.43                     | -796                             |
| -699.3                           | -928                        | 3.300303985                 | 106.7753909                           | 894                       | 11400.9841                   | -872                             |
| -95                              | -917                        | 5.040240898                 | 239.5196415                           | 1065                      | 57369.65867                  | -751.9                           |
| -254                             | -982                        | 4.716704317                 | 205.0838653                           | 1266                      | 42059.39181                  | -735                             |
| -358.9                           | -945                        | 4.471789229                 | 190.0001274                           | 1037                      | 36100.0484                   | -793                             |
| -66.1                            | -805                        | 4.962095884                 | 210.782684                            | 1010                      | 44429.33988                  | -635.9                           |
| -433                             | -966                        | 4.230718803                 | 213.2212413                           | 1268                      | 45463.29773                  | -847                             |
| -148                             | -951                        | 5.032702153                 | 247.6753298                           | 1099                      | 61343.06897                  | -826                             |
| -282.2                           | -993                        | 4.426829167                 | 252.4995147                           | 1224                      | 63756.00491                  | -888                             |
| -283.3                           | -753                        | 4.419407987                 | 152.4833771                           | 760                       | 23251.18029                  | -671                             |
| -551.3                           | -950                        | 3.883606548                 | 153.1402976                           | 1373                      | 23451.95076                  | -844                             |





| original_glrjm_LongRunHighGrayLevelEmphasis | original_glrjm_RunPercentage | original_glrjm_LongRunLowGrayLevelEmphasis | original_glrjm_RunEntropy | original_glrjm_HighGrayLevelRunEmphasis |
|---------------------------------------------|------------------------------|--------------------------------------------|---------------------------|-----------------------------------------|
| 455.1486826                                 | 0.946893352                  | 0.10650001                                 | 5.24488763                | 420.4486548                             |
| 82.55093369                                 | 0.909008638                  | 0.083009627                                | 4.206366646               | 73.51691531                             |
| 203.8995471                                 | 0.876491826                  | 0.178400911                                | 5.052418371               | 178.6610899                             |
| 537.2125958                                 | 0.922289583                  | 0.010360424                                | 5.075215241               | 424.6919612                             |
| 171.243004                                  | 0.928501819                  | 0.047811582                                | 4.790369429               | 158.4891326                             |
| 198.9970194                                 | 0.943939394                  | 0.020019278                                | 4.595230198               | 181.0051812                             |
| 354.2077517                                 | 0.917632005                  | 0.016573782                                | 5.286215337               | 311.8916613                             |
| 278.3409362                                 | 0.895970122                  | 0.012408642                                | 4.609881285               | 232.2104538                             |
| 368.1597029                                 | 0.934481708                  | 0.017065703                                | 5.112912485               | 307.0210248                             |
| 215.5869801                                 | 0.94151837                   | 0.035675889                                | 4.891231543               | 198.4943222                             |
| 274.6651104                                 | 0.937104673                  | 0.01703066                                 | 4.911047806               | 243.9839517                             |
| 342.6117261                                 | 0.930852661                  | 0.008321958                                | 4.79517548                | 303.5667566                             |
| 93.95836193                                 | 0.860244737                  | 0.086387135                                | 4.101319614               | 78.55821565                             |
| 249.0603324                                 | 0.925048161                  | 0.024856739                                | 4.830586904               | 225.5889999                             |
| 295.3201546                                 | 0.924317618                  | 0.014317718                                | 4.805800913               | 265.4296179                             |
| 321.6946602                                 | 0.896656588                  | 0.023555539                                | 4.752511607               | 251.8986445                             |
| 538.2842382                                 | 0.952196882                  | 0.005994503                                | 5.124947373               | 473.3040629                             |
| 96.12331755                                 | 0.893630295                  | 0.090966051                                | 4.385929625               | 85.78382666                             |
| 266.5939704                                 | 0.930010667                  | 0.01083137                                 | 4.672382857               | 232.0069433                             |
| 351.353247                                  | 0.931599272                  | 0.008707039                                | 4.926476778               | 307.8555919                             |
| 111.4262879                                 | 0.880698006                  | 0.075010678                                | 4.48754421                | 95.1278424                              |
| 210.6966143                                 | 0.946175233                  | 0.016440164                                | 4.70533151                | 192.8785807                             |
| 158.5054852                                 | 0.925030048                  | 0.045407118                                | 4.655642341               | 144.473835                              |
| 381.0443919                                 | 0.931882247                  | 0.017944116                                | 5.297263049               | 328.3011529                             |
| 143.8389706                                 | 0.911112454                  | 0.040181863                                | 4.433013187               | 128.2833657                             |
| 457.6018876                                 | 0.944312758                  | 0.009430844                                | 5.279283659               | 401.6027642                             |
| 501.6813063                                 | 0.936567608                  | 0.007171337                                | 5.145113086               | 443.6183342                             |
| 256.2014528                                 | 0.928173564                  | 0.017169358                                | 4.881302093               | 227.5689392                             |
| 288.6146837                                 | 0.959903631                  | 0.015813281                                | 4.695497957               | 260.5884347                             |
| 125.7938544                                 | 0.924387686                  | 0.051993208                                | 4.608113955               | 111.9677377                             |
| 287.1980449                                 | 0.900895658                  | 0.013655761                                | 4.787494213               | 247.0317568                             |
| 162.1674027                                 | 0.897386326                  | 0.068985059                                | 4.65707876                | 143.1189022                             |
| 504.2965281                                 | 0.927436453                  | 0.015636578                                | 5.209168393               | 397.8341592                             |
| 294.9944669                                 | 0.905630115                  | 0.03007008                                 | 4.99536551                | 255.2198178                             |
| 315.9426386                                 | 0.930377978                  | 0.011005762                                | 4.946432629               | 279.4044259                             |
| 183.3147905                                 | 0.895426681                  | 0.025346194                                | 4.457752627               | 155.7164371                             |
| 227.2689323                                 | 0.905401774                  | 0.032596237                                | 4.692752672               | 200.4104169                             |
| 938.4918738                                 | 0.843411384                  | 0.039185402                                | 4.969183833               | 452.3347094                             |
| 354.9703941                                 | 0.944465291                  | 0.014543175                                | 5.181878117               | 313.1885221                             |
| 681.0326185                                 | 0.939371495                  | 0.008359788                                | 5.561109519               | 552.1673231                             |
| 306.2081318                                 | 0.919459107                  | 0.015141868                                | 4.865661743               | 267.8707362                             |
| 815.0086953                                 | 0.96347795                   | 0.008004494                                | 5.547063946               | 735.0544853                             |
| 266.7326893                                 | 0.930573396                  | 0.025022247                                | 5.0703216                 | 240.0601654                             |
| 408.8457139                                 | 0.947069008                  | 0.011195427                                | 5.165220922               | 375.6148056                             |
| 141.1156324                                 | 0.928855182                  | 0.041987834                                | 4.608994121               | 128.3308675                             |
| 357.8457613                                 | 0.931427771                  | 0.011306665                                | 5.015712234               | 319.8348581                             |
| 370.4985137                                 | 0.9238357                    | 0.009147708                                | 5.024795744               | 322.5772126                             |
| 259.6793145                                 | 0.934734611                  | 0.011659968                                | 4.67313447                | 223.9336583                             |
| 253.5060765                                 | 0.94621712                   | 0.023384437                                | 4.989992339               | 228.730352                              |
| 168.7551777                                 | 0.904813382                  | 0.018889156                                | 4.227912202               | 140.8480295                             |
| 237.3013046                                 | 0.935054047                  | 0.016262542                                | 4.751541037               | 213.8250026                             |
| 608.9964004                                 | 0.958994135                  | 0.006593694                                | 5.451044086               | 556.1828368                             |
| 403.7198243                                 | 0.944677441                  | 0.006692177                                | 5.017721576               | 360.1010771                             |
| 191.7946979                                 | 0.925585284                  | 0.035978871                                | 4.752974511               | 176.1396092                             |
| 170.1293713                                 | 0.915037594                  | 0.041276842                                | 4.778054109               | 153.0753175                             |
| 187.5673334                                 | 0.929625247                  | 0.020951255                                | 4.664682698               | 165.8010422                             |
| 301.8626762                                 | 0.938974993                  | 0.026260376                                | 5.160025167               | 267.6488638                             |
| 429.2881468                                 | 0.919273035                  | 0.009337253                                | 5.034330205               | 363.4303646                             |
| 274.4584382                                 | 0.9410941                    | 0.012793304                                | 4.820893585               | 248.5316436                             |
| 1116.41706                                  | 0.934941059                  | 0.004698955                                | 5.670152425               | 844.4878502                             |
| 226.1712664                                 | 0.895156373                  | 0.018274622                                | 4.666281171               | 192.0958418                             |
| 210.8924575                                 | 0.924805532                  | 0.028288378                                | 4.869621362               | 190.5310508                             |
| 243.0381646                                 | 0.917695364                  | 0.020480881                                | 4.859926911               | 215.306255                              |
| 431.4417541                                 | 0.922370559                  | 0.014930049                                | 5.32711299                | 373.2454301                             |
| 242.7459638                                 | 0.92677702                   | 0.01152326                                 | 4.467302168               | 205.2972326                             |
| 173.2148061                                 | 0.900649325                  | 0.037336279                                | 4.672442743               | 149.3862426                             |
| 221.509362                                  | 0.915172251                  | 0.016998943                                | 4.588917509               | 191.3664598                             |
| 414.2403154                                 | 0.925452308                  | 0.013242432                                | 5.253198557               | 354.9885487                             |
| 619.0164309                                 | 0.947662889                  | 0.006808098                                | 5.442728287               | 563.2032326                             |
| 164.1222957                                 | 0.907469342                  | 0.026593925                                | 4.592370593               | 141.0770129                             |
| 194.5839818                                 | 0.911766448                  | 0.055429432                                | 4.681211075               | 160.138775                              |
| 278.4601218                                 | 0.896664874                  | 0.012099507                                | 4.454183134               | 232.046842                              |
| 367.5819404                                 | 0.920140412                  | 0.009253183                                | 4.874724076               | 319.7284066                             |
| 531.5694518                                 | 0.95321279                   | 0.007492318                                | 5.313263979               | 484.0961651                             |
| 455.3649912                                 | 0.951969142                  | 0.011947558                                | 5.382574251               | 410.0029887                             |
| 304.6112251                                 | 0.946176774                  | 0.01364846                                 | 4.982481061               | 273.8672838                             |
| 268.1505799                                 | 0.924040067                  | 0.013222092                                | 4.831751734               | 227.0362602                             |
| 139.1531803                                 | 0.907339008                  | 0.027178504                                | 4.29854809                | 119.2214381                             |
| 193.852794                                  | 0.935604524                  | 0.043916666                                | 4.816856685               | 171.5222226                             |
| 737.5450377                                 | 0.947479199                  | 0.00852279                                 | 5.611639601               | 625.3685852                             |
| 457.6602883                                 | 0.945043895                  | 0.011081883                                | 5.212470119               | 414.2076185                             |
| 312.1902983                                 | 0.920767948                  | 0.019097547                                | 4.900357138               | 265.3245721                             |
| 393.0419091                                 | 0.887168506                  | 0.028410904                                | 4.843126138               | 271.282298                              |
| 372.4278896                                 | 0.935292498                  | 0.011035488                                | 5.170686756               | 315.3743774                             |
| 429.6328141                                 | 0.930046993                  | 0.01000551                                 | 5.10689294                | 369.0349749                             |
| 84.72778876                                 | 0.840982125                  | 0.06119411                                 | 4.014439984               | 64.03751984                             |
| 490.1058114                                 | 0.934365425                  | 0.011957689                                | 5.340912115               | 441.9036465                             |
| 169.8929712                                 | 0.914127812                  | 0.033264846                                | 4.705741217               | 152.4798129                             |
| 227.8842515                                 | 0.929960067                  | 0.019377475                                | 4.81981225                | 200.6431714                             |
| 153.9708973                                 | 0.914909782                  | 0.049830338                                | 4.687250055               | 137.4254443                             |
| 81.59427915                                 | 0.862970732                  | 0.067454238                                | 4.028498878               | 66.93175503                             |
| 471.8052572                                 | 0.952916102                  | 0.010857718                                | 5.303559752               | 411.0457397                             |
| 471.5648218                                 | 0.943706496                  | 0.005810183                                | 5.056049919               | 417.1376514                             |
| 275.5423101                                 | 0.91995338                   | 0.017236454                                | 4.923453683               | 241.5186726                             |
| 435.3472696                                 | 0.951481193                  | 0.008614381                                | 5.246631065               | 388.0199695                             |
| 253.4885649                                 | 0.896978825                  | 0.024429074                                | 4.80320511                | 220.8006106                             |
| 471.0307178                                 | 0.935638022                  | 0.013841954                                | 5.376680236               | 384.6349382                             |
| 305.4887004                                 | 0.920652413                  | 0.027088671                                | 4.869262667               | 265.2730738                             |
| 190.9797037                                 | 0.924368198                  | 0.028874038                                | 4.808808826               | 167.4552959                             |
| 156.9614991                                 | 0.877194852                  | 0.036277842                                | 4.549884252               | 133.403794                              |

| original_glrln_RunLengthNonUniformityNormalized | original_glszm_GrayLevelVariance | original_glszm_SmallAreaHighGrayLevelEmphasis | original_glszm_GrayLevelNonUniformityNormalized |
|-------------------------------------------------|----------------------------------|-----------------------------------------------|-------------------------------------------------|
| 0.900310917                                     | 139.8918282                      | 463.005072                                    | 0.030219056                                     |
| 0.837086581                                     | 43.57770493                      | 126.1701574                                   | 0.05515109                                      |
| 0.788160691                                     | 73.01698789                      | 267.212604                                    | 0.038609599                                     |
| 0.860786312                                     | 109.1369933                      | 421.4253752                                   | 0.033040182                                     |
| 0.869956339                                     | 67.76401137                      | 215.9451355                                   | 0.039995441                                     |
| 0.894888207                                     | 59.00892257                      | 219.0129606                                   | 0.044612856                                     |
| 0.853434599                                     | 76.82768855                      | 351.8299929                                   | 0.032961217                                     |
| 0.817348472                                     | 67.84986578                      | 322.1773274                                   | 0.043108429                                     |
| 0.879578699                                     | 81.75365399                      | 298.8918106                                   | 0.034877361                                     |
| 0.891207921                                     | 77.05639342                      | 247.2858674                                   | 0.03908895                                      |
| 0.882639461                                     | 64.87521596                      | 253.4444651                                   | 0.037800086                                     |
| 0.873872312                                     | 68.77192152                      | 374.3895116                                   | 0.04022131                                      |
| 0.757617416                                     | 63.35353492                      | 160.8247267                                   | 0.0585645                                       |
| 0.862753555                                     | 108.5130677                      | 302.3452071                                   | 0.039413031                                     |
| 0.862940654                                     | 94.99488678                      | 352.2278128                                   | 0.037275563                                     |
| 0.818626652                                     | 108.6140609                      | 309.2111568                                   | 0.039121789                                     |
| 0.907885017                                     | 83.29832854                      | 394.0673296                                   | 0.036181791                                     |
| 0.813366444                                     | 57.06531244                      | 183.7570216                                   | 0.04718905                                      |
| 0.869494212                                     | 47.174824                        | 254.2099616                                   | 0.044150581                                     |
| 0.873672975                                     | 68.82381243                      | 336.159045                                    | 0.037767664                                     |
| 0.792286778                                     | 50.94518943                      | 152.0781816                                   | 0.050837567                                     |
| 0.898394019                                     | 48.15232771                      | 226.4703717                                   | 0.043857105                                     |
| 0.862926156                                     | 72.8994344                       | 210.724182                                    | 0.043418324                                     |
| 0.875803321                                     | 84.71342226                      | 322.6440072                                   | 0.031621605                                     |
| 0.839538127                                     | 71.10254472                      | 211.8730151                                   | 0.048698845                                     |
| 0.895915524                                     | 84.0334558                       | 375.7493085                                   | 0.032904404                                     |
| 0.883078047                                     | 103.3651734                      | 452.9065557                                   | 0.034211318                                     |
| 0.869316052                                     | 78.07492813                      | 277.2119431                                   | 0.03805251                                      |
| 0.92244895                                      | 39.37808483                      | 228.5304015                                   | 0.045884986                                     |
| 0.860997351                                     | 41.71581567                      | 140.7704416                                   | 0.049685201                                     |
| 0.826132266                                     | 79.53324572                      | 346.3182634                                   | 0.039477213                                     |
| 0.820246189                                     | 80.81174569                      | 201.9003994                                   | 0.042110692                                     |
| 0.869032229                                     | 116.6228663                      | 360.0005933                                   | 0.032067729                                     |
| 0.831877044                                     | 109.0031084                      | 312.1077416                                   | 0.035408329                                     |
| 0.872882101                                     | 64.0746558                       | 308.4114538                                   | 0.040009188                                     |
| 0.814765632                                     | 72.23544699                      | 239.4439337                                   | 0.047164388                                     |
| 0.831381543                                     | 131.6170972                      | 314.8875544                                   | 0.04066606                                      |
| 0.745178796                                     | 165.006227                       | 389.8771014                                   | 0.035638363                                     |
| 0.894146853                                     | 67.00551957                      | 271.1935765                                   | 0.034392548                                     |
| 0.888278334                                     | 97.51583582                      | 419.645907                                    | 0.028004616                                     |
| 0.856504553                                     | 89.56182581                      | 308.2987391                                   | 0.039311859                                     |
| 0.929589126                                     | 98.36441246                      | 572.7151781                                   | 0.02752673                                      |
| 0.871582468                                     | 85.37786545                      | 291.4517971                                   | 0.035653812                                     |
| 0.901596352                                     | 113.1445069                      | 419.3646838                                   | 0.031717334                                     |
| 0.868306593                                     | 50.96009879                      | 174.5395319                                   | 0.046427158                                     |
| 0.873971831                                     | 94.29820519                      | 391.2323265                                   | 0.034720758                                     |
| 0.862016819                                     | 74.3479985                       | 352.5509585                                   | 0.036525564                                     |
| 0.879705717                                     | 41.6144641                       | 217.8798696                                   | 0.045872355                                     |
| 0.89916902                                      | 61.74312281                      | 228.4363876                                   | 0.038473614                                     |
| 0.828984344                                     | 48.9770218                       | 215.0317219                                   | 0.055217193                                     |
| 0.878997899                                     | 76.17010024                      | 261.6480669                                   | 0.041444122                                     |
| 0.92227786                                      | 98.46172441                      | 511.4383221                                   | 0.028398189                                     |
| 0.896136398                                     | 61.84518169                      | 358.1705693                                   | 0.036943061                                     |
| 0.864611179                                     | 88.60615562                      | 254.868133                                    | 0.039574517                                     |
| 0.8442733                                       | 65.85772231                      | 210.5622406                                   | 0.041233252                                     |
| 0.868853946                                     | 55.92853081                      | 200.5755379                                   | 0.04534924                                      |
| 0.886556052                                     | 88.96975689                      | 293.5699577                                   | 0.033743847                                     |
| 0.852606683                                     | 118.854981                       | 406.8391179                                   | 0.034338199                                     |
| 0.890653077                                     | 77.83149458                      | 297.0583786                                   | 0.040285676                                     |
| 0.88401827                                      | 119.619455                       | 578.3859131                                   | 0.024962805                                     |
| 0.816465221                                     | 69.96165289                      | 289.9273898                                   | 0.042289461                                     |
| 0.862416442                                     | 79.76669241                      | 249.732419                                    | 0.039084789                                     |
| 0.852205297                                     | 76.27229385                      | 292.508645                                    | 0.038041746                                     |
| 0.861447971                                     | 79.5629606                       | 376.4413395                                   | 0.033912398                                     |
| 0.865149254                                     | 39.72755383                      | 206.5544761                                   | 0.05138478                                      |
| 0.824163413                                     | 71.78293228                      | 211.2788676                                   | 0.046884621                                     |
| 0.84691925                                      | 76.20111747                      | 251.7387188                                   | 0.043421334                                     |
| 0.864447874                                     | 96.27117599                      | 363.055393                                    | 0.034361369                                     |
| 0.901889109                                     | 158.6756228                      | 597.7952554                                   | 0.028088643                                     |
| 0.832634957                                     | 55.8892839                       | 210.897345                                    | 0.0458794                                       |
| 0.842040915                                     | 75.7034723                       | 215.3350426                                   | 0.041455999                                     |
| 0.816560368                                     | 79.98847889                      | 333.0869133                                   | 0.048054766                                     |
| 0.855253518                                     | 83.73562507                      | 387.8220039                                   | 0.03751673                                      |
| 0.912056309                                     | 115.4181297                      | 477.3001508                                   | 0.0299059                                       |
| 0.909271737                                     | 94.98992735                      | 384.4630049                                   | 0.029081916                                     |
| 0.900232895                                     | 65.59629255                      | 266.6229374                                   | 0.03764153                                      |
| 0.860990949                                     | 53.94343316                      | 233.9453686                                   | 0.042594595                                     |
| 0.832652644                                     | 48.31864203                      | 171.2478922                                   | 0.055854567                                     |
| 0.879912092                                     | 61.89050979                      | 196.2158963                                   | 0.041634687                                     |
| 0.900831592                                     | 128.7417935                      | 521.8392926                                   | 0.025515031                                     |
| 0.896824024                                     | 134.9936594                      | 440.4127047                                   | 0.031202927                                     |
| 0.855372554                                     | 81.66135532                      | 292.2710009                                   | 0.036872852                                     |
| 0.802930219                                     | 115.2364942                      | 314.3082542                                   | 0.039781946                                     |
| 0.878535937                                     | 57.16621488                      | 253.4923302                                   | 0.037778674                                     |
| 0.872471386                                     | 92.05511431                      | 378.5786391                                   | 0.033112208                                     |
| 0.736439062                                     | 27.0326402                       | 110.9021228                                   | 0.070413779                                     |
| 0.880315919                                     | 128.5183776                      | 479.3755594                                   | 0.027682379                                     |
| 0.847039853                                     | 60.83136925                      | 227.2745005                                   | 0.043331426                                     |
| 0.873017093                                     | 56.73250406                      | 223.5709748                                   | 0.041143299                                     |
| 0.846397984                                     | 69.58603115                      | 192.7107416                                   | 0.043918184                                     |
| 0.764364285                                     | 40.63628624                      | 129.8284514                                   | 0.072625794                                     |
| 0.9107623                                       | 84.78323175                      | 349.1137972                                   | 0.031620281                                     |
| 0.895498728                                     | 83.1970624                       | 416.1143138                                   | 0.03568428                                      |
| 0.855468015                                     | 71.32259527                      | 282.8587691                                   | 0.038412085                                     |
| 0.907397006                                     | 73.3519979                       | 333.5915506                                   | 0.033380559                                     |
| 0.821667831                                     | 106.8305515                      | 316.7332263                                   | 0.039146722                                     |
| 0.880835771                                     | 91.37988224                      | 348.4918457                                   | 0.03165661                                      |
| 0.854535817                                     | 127.0131177                      | 327.6402723                                   | 0.037333348                                     |
| 0.861087805                                     | 48.05365047                      | 192.4627094                                   | 0.042446993                                     |
| 0.786803888                                     | 68.765201                        | 249.3094052                                   | 0.044764783                                     |



| original_glszm_LargeAreaLowGrayLevelEmphasis | original_glszm_LargeAreaHighGrayLevelEmphasis | original_glszm_HighGrayLevelZoneEmphasis | original_glszm_SmallAreaEmphasis | original_glszm_LowGrayLevelZoneEmphasis |
|----------------------------------------------|-----------------------------------------------|------------------------------------------|----------------------------------|-----------------------------------------|
| 0.149594244                                  | 2052.326478                                   | 550.4490146                              | 0.769291676                      | 0.007540928                             |
| 6.502876703                                  | 1592.741722                                   | 146.0430464                              | 0.691182478                      | 0.052433364                             |
| 19.75465802                                  | 3282.398357                                   | 327.1149897                              | 0.694071682                      | 0.019139562                             |
| 0.45320332                                   | 9772.220657                                   | 533.4389671                              | 0.750828087                      | 0.007942404                             |
| 2.014766807                                  | 1185.444871                                   | 254.0354746                              | 0.739241564                      | 0.026507058                             |
| 0.214329599                                  | 1301.03537                                    | 258.9903537                              | 0.717463183                      | 0.019074081                             |
| 2.777410111                                  | 8548.718003                                   | 444.6523038                              | 0.727331855                      | 0.007781004                             |
| 3.053117005                                  | 25543.87765                                   | 388.804361                               | 0.75182364                       | 0.006092457                             |
| 0.416309417                                  | 6876.281805                                   | 370.4762362                              | 0.738399638                      | 0.011799714                             |
| 0.737342544                                  | 1382.865497                                   | 291.8245614                              | 0.738201533                      | 0.022346212                             |
| 0.336872193                                  | 2017.971469                                   | 323.4379458                              | 0.726126274                      | 0.011244806                             |
| 0.228525764                                  | 3962.545364                                   | 440.1505484                              | 0.74283456                       | 0.005508804                             |
| 31.12004842                                  | 11156.44548                                   | 190.1902552                              | 0.747528874                      | 0.039434273                             |
| 0.71584815                                   | 2133.421419                                   | 358.4520167                              | 0.717280911                      | 0.014879171                             |
| 0.481004601                                  | 3547.379553                                   | 410.2972973                              | 0.764125152                      | 0.009297049                             |
| 5.746218792                                  | 16670.8879                                    | 395.2338377                              | 0.749579147                      | 0.011007926                             |
| 0.033581634                                  | 3268.54372                                    | 519.7694754                              | 0.710978941                      | 0.006262568                             |
| 10.30185737                                  | 3157.047887                                   | 199.9183099                              | 0.736295242                      | 0.051619394                             |
| 0.209188348                                  | 2618.801869                                   | 321.9906542                              | 0.693733044                      | 0.008484825                             |
| 0.384765711                                  | 6164.680745                                   | 424.0658492                              | 0.715413005                      | 0.005725793                             |
| 16.98763808                                  | 6029.579518                                   | 191.5819277                              | 0.699128428                      | 0.026987638                             |
| 0.221368482                                  | 1121.880374                                   | 268.411215                               | 0.722121144                      | 0.012417016                             |
| 3.425827747                                  | 2487.11165                                    | 246.2184466                              | 0.740314098                      | 0.028999218                             |
| 0.648422779                                  | 3661.32802                                    | 414.9647651                              | 0.721932092                      | 0.010988279                             |
| 2.773648957                                  | 3697.829932                                   | 242.1723356                              | 0.715351425                      | 0.024932587                             |
| 0.09581116                                   | 2922.982659                                   | 473.4682081                              | 0.732376177                      | 0.007497496                             |
| 0.211389698                                  | 5192.644841                                   | 574.9041005                              | 0.736118498                      | 0.00538695                              |
| 0.41825319                                   | 2912.434632                                   | 338.0242424                              | 0.723253872                      | 0.012181309                             |
| 0.050011789                                  | 1144.034091                                   | 288.2765152                              | 0.743974795                      | 0.019594553                             |
| 1.418504714                                  | 1179.617756                                   | 174.8606658                              | 0.676364236                      | 0.035532934                             |
| 2.654049232                                  | 16236.1982                                    | 415.4760479                              | 0.733666444                      | 0.006639938                             |
| 11.37546547                                  | 4304.574648                                   | 253.0126761                              | 0.732374258                      | 0.03816061                              |
| 0.297526597                                  | 7951.781513                                   | 457.6561625                              | 0.734938349                      | 0.011525002                             |
| 2.446555153                                  | 5446.59186                                    | 395.5965116                              | 0.74280057                       | 0.014825422                             |
| 0.400122863                                  | 3573.190786                                   | 380.565348                               | 0.741681507                      | 0.007055869                             |
| 6.261876711                                  | 15036.10915                                   | 282.485447                               | 0.745151612                      | 0.01277927                              |
| 4.453444058                                  | 7267.322866                                   | 372.0917874                              | 0.742397066                      | 0.018101863                             |
| 21.03619601                                  | 292180.8853                                   | 502.9536528                              | 0.755347254                      | 0.015264019                             |
| 0.13514965                                   | 1949.539792                                   | 377.2041522                              | 0.640714742                      | 0.010999176                             |
| 0.236680283                                  | 10878.70843                                   | 576.4027149                              | 0.706281705                      | 0.00611848                              |
| 0.966407446                                  | 4834.514174                                   | 395.8631476                              | 0.71620579                       | 0.008171017                             |
| 0.038610541                                  | 2947.351452                                   | 754.1493776                              | 0.75433096                       | 0.005504721                             |
| 0.564079674                                  | 2081.788462                                   | 354.3622829                              | 0.725434193                      | 0.01597563                              |
| 0.132012555                                  | 2014.403577                                   | 505.6835148                              | 0.743655485                      | 0.00805294                              |
| 1.364520717                                  | 1385.118421                                   | 206.693609                               | 0.713349771                      | 0.024509061                             |
| 0.397814382                                  | 3959.301136                                   | 463.2686688                              | 0.749390451                      | 0.006848083                             |
| 0.674393653                                  | 7502.749476                                   | 448.0041929                              | 0.721233065                      | 0.005690255                             |
| 0.129935317                                  | 2319.497312                                   | 284.3709677                              | 0.675571925                      | 0.011602421                             |
| 0.186645299                                  | 1063.628571                                   | 285.4263736                              | 0.717662218                      | 0.019194047                             |
| 2.855338811                                  | 16606.62963                                   | 249.0074074                              | 0.722084364                      | 0.01267883                              |
| 0.315276696                                  | 1850.80531                                    | 315.9265487                              | 0.706091549                      | 0.011837909                             |
| 0.042082231                                  | 2291.758655                                   | 638.4119418                              | 0.751570035                      | 0.004929953                             |
| 0.113103338                                  | 3122.558383                                   | 453.0436165                              | 0.724792766                      | 0.005085098                             |
| 0.815980689                                  | 1497.384946                                   | 294.544086                               | 0.724337953                      | 0.02457278                              |
| 1.361418206                                  | 1638.672932                                   | 251.575188                               | 0.731389173                      | 0.023752072                             |
| 0.521126979                                  | 2214.769712                                   | 245.1889862                              | 0.701880731                      | 0.015373414                             |
| 0.584860881                                  | 7129.477249                                   | 358.8531541                              | 0.738283616                      | 0.016440052                             |
| 0.339809872                                  | 2127.474717                                   | 522.8498113                              | 0.704931952                      | 0.00694446                              |
| 0.178931153                                  | 2205.947368                                   | 350.2297818                              | 0.734253213                      | 0.010026243                             |
| 0.062298953                                  | 92865.39961                                   | 765.9848751                              | 0.739187153                      | 0.004226552                             |
| 1.687877188                                  | 8441.74876                                    | 335.3553719                              | 0.753501543                      | 0.010103633                             |
| 1.155208314                                  | 2395.857143                                   | 297.0722997                              | 0.73634576                       | 0.019550785                             |
| 1.639556918                                  | 5284.631623                                   | 304.1009595                              | 0.765115104                      | 0.010225925                             |
| 1.158467437                                  | 4943.146939                                   | 491.3152276                              | 0.690342901                      | 0.005885554                             |
| 0.269264092                                  | 3532.224359                                   | 272.3878205                              | 0.666243003                      | 0.010239744                             |
| 5.212310552                                  | 8698.930577                                   | 258.375975                               | 0.71135108                       | 0.017539992                             |
| 0.629876991                                  | 4031.910448                                   | 305.9594883                              | 0.703539135                      | 0.013750004                             |
| 0.577852446                                  | 4691.349338                                   | 467.6018904                              | 0.71295023                       | 0.007242489                             |
| 0.099491336                                  | 3535.815461                                   | 728.4085526                              | 0.741938581                      | 0.005419373                             |
| 1.338681086                                  | 3810.041139                                   | 248.2732068                              | 0.715045272                      | 0.015496771                             |
| 3.291442793                                  | 3340.693252                                   | 253.5357873                              | 0.750729261                      | 0.0279653                               |
| 5.115239731                                  | 48770.08686                                   | 398.9569414                              | 0.753360265                      | 0.00643432                              |
| 0.897183685                                  | 11761.73732                                   | 479.1939121                              | 0.734272486                      | 0.005926907                             |
| 0.082583289                                  | 2258.886328                                   | 589.7782194                              | 0.746456568                      | 0.005474432                             |
| 0.102739129                                  | 2128.803979                                   | 484.8964307                              | 0.74006643                       | 0.009068978                             |
| 0.125411957                                  | 1626.712349                                   | 348.0286145                              | 0.675431321                      | 0.012473519                             |
| 0.321720704                                  | 3337.730811                                   | 304.7805405                              | 0.676415024                      | 0.009468043                             |
| 1.752921049                                  | 3886.01227                                    | 202.809816                               | 0.729005291                      | 0.018673318                             |
| 0.780179417                                  | 1484.382199                                   | 242.5536649                              | 0.724762422                      | 0.025864941                             |
| 0.100303149                                  | 6395.384248                                   | 677.7995227                              | 0.746119558                      | 0.006745532                             |
| 0.160577465                                  | 2313.451673                                   | 527.3355019                              | 0.768449309                      | 0.007864473                             |
| 0.607267873                                  | 4383.47769                                    | 370.9291339                              | 0.74817712                       | 0.01441374                              |
| 7.622177719                                  | 24517.04837                                   | 401.9921027                              | 0.743191005                      | 0.014508894                             |
| 0.213707442                                  | 3399.852021                                   | 368.9809306                              | 0.646031911                      | 0.007596636                             |
| 0.15271397                                   | 3301.85591                                    | 475.0862813                              | 0.726754605                      | 0.006728692                             |
| 27.1499603                                   | 20412.11884                                   | 134.1101449                              | 0.710303578                      | 0.023802297                             |
| 0.556217577                                  | 3576.170994                                   | 605.2193375                              | 0.736983801                      | 0.006345972                             |
| 2.454181465                                  | 3282.562679                                   | 264.0507177                              | 0.731122201                      | 0.016286099                             |
| 0.538663258                                  | 2172.198128                                   | 276.1513261                              | 0.719010519                      | 0.015234593                             |
| 3.014536635                                  | 2396.394521                                   | 238.1589041                              | 0.69489649                       | 0.032450956                             |
| 26.72172796                                  | 12652.99413                                   | 146.3460411                              | 0.759003598                      | 0.033196262                             |
| 0.083255835                                  | 3498.411315                                   | 456.2882263                              | 0.72600047                       | 0.007652577                             |
| 0.073767223                                  | 3701.162899                                   | 521.1742011                              | 0.736549172                      | 0.004633873                             |
| 0.714615343                                  | 4220.299473                                   | 357.489842                               | 0.721419779                      | 0.011200097                             |
| 0.073092694                                  | 2203.320779                                   | 444.3229437                              | 0.717350942                      | 0.006875736                             |
| 4.289756227                                  | 910.079839                                    | 376.1080645                              | 0.760588571                      | 0.011485962                             |
| 0.277963452                                  | 6198.356761                                   | 453.2803667                              | 0.711313448                      | 0.009730724                             |
| 0.732016086                                  | 2815.332542                                   | 397.8931116                              | 0.736986785                      | 0.018064557                             |
| 0.477803658                                  | 1604.161383                                   | 240.9193084                              | 0.686497729                      | 0.017955919                             |
| 11.42807682                                  | 14473.36781                                   | 282.9736842                              | 0.769804818                      | 0.013417759                             |





| wavelet.LHL_gldm_GrayLevelVariance | wavelet.LHL_gldm_HighGrayLevelEmphasis | wavelet.LHL_gldm_GrayLevelNonUniformityNormalized | wavelet.LHL_gldm_DependenceEntropy | wavelet.LHL_gldm_DependenceNonUniformity |
|------------------------------------|----------------------------------------|---------------------------------------------------|------------------------------------|------------------------------------------|
| 92.37157542                        | 1652.844958                            | 0.031427858                                       | 6.904606144                        | 737.1847314                              |
| 40.33631388                        | 1455.544385                            | 0.056247534                                       | 6.471907656                        | 230.0780749                              |
| 31.07438861                        | 566.9350722                            | 0.059005013                                       | 6.614269526                        | 332.2972621                              |
| 48.0056761                         | 2540.539406                            | 0.052556811                                       | 6.531564881                        | 240.9856704                              |
| 38.26189405                        | 711.9142736                            | 0.052439409                                       | 6.626362235                        | 583.4603041                              |
| 51.82564509                        | 676.2954545                            | 0.042548209                                       | 6.331488912                        | 223.5424242                              |
| 41.71385649                        | 1461.740577                            | 0.050845028                                       | 6.739846821                        | 1433.342948                              |
| 30.21697363                        | 1583.962608                            | 0.071274795                                       | 6.514741672                        | 1059.060689                              |
| 31.48334777                        | 1137.609107                            | 0.06667426                                        | 6.597724533                        | 963.4148702                              |
| 42.34109768                        | 1156.854478                            | 0.055989293                                       | 6.339571553                        | 298.3283582                              |
| 23.6033335                         | 544.6717507                            | 0.068031507                                       | 6.306098307                        | 343.7665782                              |
| 55.5784522                         | 1734.373536                            | 0.047818521                                       | 6.648954507                        | 629.3722343                              |
| 34.51936819                        | 1565.478843                            | 0.092575385                                       | 6.551889555                        | 288.1130155                              |
| 38.42293499                        | 1117.910891                            | 0.057070529                                       | 6.581270498                        | 392.7414094                              |
| 79.17278449                        | 2261.626008                            | 0.043749695                                       | 6.773865614                        | 567.8629032                              |
| 37.81726647                        | 1909.427559                            | 0.051278538                                       | 6.712760406                        | 1081.275594                              |
| 64.84203612                        | 1763.262144                            | 0.039808198                                       | 6.64516745                         | 367.6582915                              |
| 28.35488121                        | 955.7623682                            | 0.076779481                                       | 6.317074547                        | 236.8588808                              |
| 19.27490497                        | 343.6910632                            | 0.07174247                                        | 6.26880651                         | 283.8844376                              |
| 59.02072724                        | 2622.351991                            | 0.046514967                                       | 6.746228935                        | 1442.810348                              |
| 15.4002775                         | 604.875                                | 0.0979035                                         | 6.49525105                         | 435.2453704                              |
| 34.26524749                        | 785.3503244                            | 0.056004728                                       | 6.307403478                        | 288.5755329                              |
| 71.78768063                        | 729.0791016                            | 0.037723541                                       | 6.692889682                        | 314.0839844                              |
| 28.74941416                        | 640.2417832                            | 0.058380452                                       | 6.400429574                        | 684.4250094                              |
| 61.55340139                        | 1775.500393                            | 0.051562792                                       | 6.570797426                        | 341.0974077                              |
| 39.31869916                        | 1000.371043                            | 0.052383565                                       | 6.602416354                        | 609.8180667                              |
| 62.50632297                        | 1571.803588                            | 0.040804172                                       | 6.827117215                        | 937.8270956                              |
| 36.50932944                        | 1585.966329                            | 0.059219174                                       | 6.570766438                        | 645.2925416                              |
| 43.8768624                         | 1631.908277                            | 0.051273967                                       | 6.214490896                        | 134.4899329                              |
| 42.51965695                        | 1391.096884                            | 0.05187304                                        | 6.612934502                        | 521.9717624                              |
| 31.23570757                        | 823.1057167                            | 0.072674663                                       | 6.685999554                        | 877.2501051                              |
| 38.78583785                        | 1170.527791                            | 0.050714581                                       | 6.620893841                        | 514.2556791                              |
| 55.1326818                         | 1849.831836                            | 0.041785975                                       | 6.83017369                         | 916.3118613                              |
| 47.96267651                        | 875.7612766                            | 0.043070349                                       | 6.644695318                        | 695.1182979                              |
| 32.33564896                        | 1031.090827                            | 0.055974525                                       | 6.525036811                        | 1110.72525                               |
| 27.07625605                        | 873.306102                             | 0.075127521                                       | 6.468298804                        | 583.3734578                              |
| 39.33821355                        | 1630.900027                            | 0.066795004                                       | 6.564325379                        | 807.4450417                              |
| 48.37787332                        | 1690.896532                            | 0.05241024                                        | 7.002029021                        | 1113.500291                              |
| 39.16502677                        | 1122.217073                            | 0.051014608                                       | 6.368880562                        | 366.702439                               |
| 52.76077281                        | 2475.255433                            | 0.043330565                                       | 6.815881997                        | 2032.057772                              |
| 28.70077336                        | 753.8546646                            | 0.066818095                                       | 6.547655768                        | 540.1781033                              |
| 67.23172242                        | 1230.734937                            | 0.037976649                                       | 6.683507097                        | 1311.782002                              |
| 41.713852                          | 1492.045442                            | 0.056617794                                       | 6.655110357                        | 861.57268                                |
| 61.80944353                        | 1510.150322                            | 0.040291793                                       | 6.669567703                        | 795.8786174                              |
| 42.53451084                        | 713.741784                             | 0.050612141                                       | 6.437599186                        | 366.85759                                |
| 33.61794022                        | 1027.073224                            | 0.05599278                                        | 6.577574895                        | 668.1832423                              |
| 38.6803215                         | 2533.268961                            | 0.054694625                                       | 6.7016325                          | 1060.3516                                |
| 65.96424923                        | 2999.971297                            | 0.057981311                                       | 6.547227145                        | 202.4626866                              |
| 56.92383744                        | 2888.014101                            | 0.046250972                                       | 6.460191294                        | 248.2714454                              |
| 28.38139421                        | 342.5517751                            | 0.079302852                                       | 6.273777476                        | 270.9615385                              |
| 70.43910226                        | 5259.316855                            | 0.042636241                                       | 6.79091506                         | 743.7637213                              |
| 76.62822594                        | 1278.851676                            | 0.034637402                                       | 6.831410454                        | 1135.231979                              |
| 37.58510751                        | 877.7240691                            | 0.056090575                                       | 6.512294193                        | 1177.001773                              |
| 23.47991165                        | 1294.686594                            | 0.069365679                                       | 6.305354364                        | 241.6974638                              |
| 23.70719034                        | 362.4609203                            | 0.073398157                                       | 6.282194895                        | 291.4526316                              |
| 61.4377712                         | 2469.227179                            | 0.049826167                                       | 6.663847868                        | 512.2605128                              |
| 46.43798833                        | 1255.603214                            | 0.046408375                                       | 6.691446695                        | 1117.625464                              |
| 40.90778786                        | 1159.672932                            | 0.0504688                                         | 6.618899499                        | 916.5465587                              |
| 41.15514503                        | 912.2287621                            | 0.05437011                                        | 6.513031463                        | 421.618932                               |
| 37.60974094                        | 1225.26487                             | 0.059150797                                       | 6.770456045                        | 2040.59426                               |
| 49.278487                          | 1249.630238                            | 0.043147332                                       | 6.533202698                        | 553.3499434                              |
| 61.13185779                        | 2239.853558                            | 0.049868283                                       | 6.647323446                        | 746.552809                               |
| 38.45002207                        | 912.664018                             | 0.05481041                                        | 6.65124696                         | 1424.843496                              |
| 60.520061                          | 1817.419782                            | 0.040326205                                       | 6.78950274                         | 2322.149154                              |
| 25.16618491                        | 559.5367089                            | 0.071209742                                       | 6.23799195                         | 182.6177215                              |
| 28.47719068                        | 1062.544278                            | 0.073494654                                       | 6.628383139                        | 727.6431901                              |
| 37.51347435                        | 796.9723926                            | 0.055615802                                       | 6.48118501                         | 323.7592025                              |
| 64.49110845                        | 1683.43968                             | 0.03781079                                        | 6.860497199                        | 1922.46464                               |
| 30.52114774                        | 779.5344033                            | 0.060080108                                       | 6.520904557                        | 1461.599283                              |
| 29.42665642                        | 696.573844                             | 0.061369755                                       | 6.49496808                         | 668.6825397                              |
| 30.37738866                        | 531.56505                              | 0.068025917                                       | 6.37117168                         | 280.7167052                              |
| 85.98263561                        | 1718.519347                            | 0.036550443                                       | 7.110658182                        | 1167.193939                              |
| 66.20488844                        | 3332.78631                             | 0.049471865                                       | 6.892181395                        | 541.1342694                              |
| 66.03608565                        | 1235.379371                            | 0.038157929                                       | 6.640690648                        | 770.4484285                              |
| 37.12904093                        | 743.5918237                            | 0.052244067                                       | 6.607872883                        | 803.0836793                              |
| 49.47987245                        | 1244.155738                            | 0.045040323                                       | 6.524252746                        | 408.8122206                              |
| 47.10621278                        | 1376.189482                            | 0.049991499                                       | 6.628203554                        | 649.3973289                              |
| 42.65481322                        | 1531.100209                            | 0.057005941                                       | 6.42404176                         | 245.4509395                              |
| 26.22917385                        | 722.2677211                            | 0.064681801                                       | 6.384961764                        | 396.9765671                              |
| 53.68229956                        | 1355.846088                            | 0.042837943                                       | 6.609531375                        | 715.6695169                              |
| 94.23345949                        | 1476.39819                             | 0.031405258                                       | 6.90390785                         | 697.4605329                              |
| 45.59105253                        | 1162.503057                            | 0.057618633                                       | 6.601299182                        | 431.5169539                              |
| 19.67044759                        | 1097.313246                            | 0.095325715                                       | 6.385925279                        | 539.4661976                              |
| 12.33280509                        | 243.6241458                            | 0.087696299                                       | 6.336197812                        | 532.8893589                              |
| 43.0018446                         | 889.4563346                            | 0.045206188                                       | 6.549967122                        | 717.0631406                              |
| 15.30120314                        | 695.4144909                            | 0.100556553                                       | 6.30161079                         | 233.3407311                              |
| 36.03518567                        | 1110.033124                            | 0.059891267                                       | 6.594104659                        | 566.2167715                              |
| 30.68874761                        | 785.1345733                            | 0.070143448                                       | 6.567382975                        | 545.8942378                              |
| 23.77492423                        | 784.4644809                            | 0.068897623                                       | 6.351706512                        | 314.1803279                              |
| 46.20684749                        | 1732.718519                            | 0.057320287                                       | 6.680267014                        | 458.862716                               |
| 37.0941205                         | 1242.099693                            | 0.076585965                                       | 6.5095308                          | 240.0460123                              |
| 49.36041089                        | 1518.161209                            | 0.042973082                                       | 6.573738973                        | 736.1494542                              |
| 45.9702606                         | 1041.924947                            | 0.048767641                                       | 6.680373349                        | 1417.523635                              |
| 30.68360882                        | 1009.235758                            | 0.059983655                                       | 6.5038082798                       | 780.5078788                              |
| 33.97559982                        | 886.3821232                            | 0.052745568                                       | 6.592898552                        | 1103.35386                               |
| 49.38853077                        | 1337.195792                            | 0.04779163                                        | 6.690855753                        | 943.0455874                              |
| 47.97227014                        | 1180.98651                             | 0.048652452                                       | 6.742167799                        | 712.2822151                              |
| 52.52053395                        | 1446.369628                            | 0.054271585                                       | 6.564852281                        | 255.7946514                              |
| 16.72510768                        | 309.118705                             | 0.085189402                                       | 6.258026677                        | 149.323741                               |
| 50.18829631                        | 1941.835643                            | 0.048258506                                       | 6.863594157                        | 1416.20194                               |

| wavelet.LHL_gldm_GrayLevelNonUniformity | wavelet.LHL_gldm_SmallDependenceEmphasis | wavelet.LHL_gldm_DependenceNonUniformityNormalized | wavelet.LHL_gldm_DependenceVariance |
|-----------------------------------------|------------------------------------------|----------------------------------------------------|-------------------------------------|
| 66.68991517                             | 0.576035502                              | 0.34740091                                         | 1.10275992                          |
| 52.59144385                             | 0.42157208                               | 0.246072807                                        | 1.801165604                         |
| 90.5136897                              | 0.395836995                              | 0.216621422                                        | 2.735791422                         |
| 51.34800409                             | 0.440296456                              | 0.246658823                                        | 1.861573614                         |
| 124.17652003                            | 0.431758375                              | 0.246393709                                        | 1.849775583                         |
| 28.08181818                             | 0.548384654                              | 0.338700643                                        | 0.955472911                         |
| 287.3252522                             | 0.45720801                               | 0.253644125                                        | 2.281995494                         |
| 364.0716523                             | 0.391367067                              | 0.207333729                                        | 3.50022076                          |
| 303.1011879                             | 0.397746662                              | 0.21192584                                         | 3.016940387                         |
| 60.02052239                             | 0.484973991                              | 0.278291379                                        | 1.574177851                         |
| 102.5915119                             | 0.404707607                              | 0.227961922                                        | 2.134613626                         |
| 110.221692                              | 0.495676832                              | 0.273046522                                        | 2.087994316                         |
| 172.8382432                             | 0.33260297                               | 0.154318701                                        | 6.872384771                         |
| 97.99009901                             | 0.415327403                              | 0.228736989                                        | 2.255779252                         |
| 86.79939516                             | 0.508346937                              | 0.286221221                                        | 1.707157258                         |
| 224.3948812                             | 0.447595425                              | 0.247092229                                        | 2.312071788                         |
| 47.53098827                             | 0.516795996                              | 0.307921517                                        | 1.197517459                         |
| 94.66909976                             | 0.356009124                              | 0.19209966                                         | 2.999769123                         |
| 93.12172573                             | 0.378917604                              | 0.21870912                                         | 2.264132801                         |
| 241.8313137                             | 0.496381119                              | 0.277516897                                        | 1.612475745                         |
| 296.0601852                             | 0.27991091                               | 0.143930347                                        | 6.055884494                         |
| 60.42910102                             | 0.473526583                              | 0.267447204                                        | 1.545633593                         |
| 38.62890625                             | 0.52062283                               | 0.306722641                                        | 1.12852478                          |
| 154.5330563                             | 0.457856566                              | 0.258566305                                        | 1.937688545                         |
| 65.63943441                             | 0.483045574                              | 0.267947689                                        | 1.875404883                         |
| 124.0966653                             | 0.458368257                              | 0.257415815                                        | 2.019080707                         |
| 131.9198886                             | 0.515667406                              | 0.290079522                                        | 1.768338399                         |
| 163.5633599                             | 0.425746719                              | 0.233632347                                        | 2.451659299                         |
| 22.91946309                             | 0.487324136                              | 0.300872333                                        | 1.048811615                         |
| 106.5472249                             | 0.447356268                              | 0.254124519                                        | 1.860969026                         |
| 345.7860446                             | 0.357790997                              | 0.184373709                                        | 4.326250022                         |
| 104.9284679                             | 0.435296391                              | 0.248552769                                        | 1.772939438                         |
| 134.9269124                             | 0.500090922                              | 0.283775739                                        | 1.868672541                         |
| 101.2153191                             | 0.492636795                              | 0.29579502                                         | 1.298578542                         |
| 246.5118074                             | 0.449602577                              | 0.252208277                                        | 1.855028168                         |
| 225.3074358                             | 0.359759996                              | 0.19452266                                         | 3.192288282                         |
| 248.5442085                             | 0.404838075                              | 0.216996786                                        | 2.737265436                         |
| 270.4892463                             | 0.402610888                              | 0.215752817                                        | 4.551802583                         |
| 62.74796748                             | 0.492018392                              | 0.298132064                                        | 1.438062                            |
| 315.013205                              | 0.488691322                              | 0.279512761                                        | 1.734199713                         |
| 173.3261372                             | 0.376790211                              | 0.208241366                                        | 2.976585549                         |
| 146.8557021                             | 0.559428839                              | 0.339224722                                        | 1.000525556                         |
| 206.8248015                             | 0.424123818                              | 0.235853457                                        | 2.160079926                         |
| 100.2459807                             | 0.537461514                              | 0.319886904                                        | 1.229668324                         |
| 64.68231612                             | 0.49318084                               | 0.287056017                                        | 1.400902721                         |
| 153.7001821                             | 0.431231813                              | 0.243418303                                        | 2.03535967                          |
| 249.5168786                             | 0.420241458                              | 0.232431302                                        | 2.468704839                         |
| 50.50172216                             | 0.418920675                              | 0.232448549                                        | 2.108175013                         |
| 39.35957697                             | 0.501017554                              | 0.291740829                                        | 1.546023825                         |
| 107.2174556                             | 0.369620141                              | 0.200415339                                        | 2.995612461                         |
| 109.5325029                             | 0.507016196                              | 0.289514878                                        | 1.535669852                         |
| 116.7626817                             | 0.552983642                              | 0.336764159                                        | 1.009826516                         |
| 253.0806738                             | 0.460537554                              | 0.260860322                                        | 1.77227433                          |
| 76.57971014                             | 0.374563791                              | 0.218928862                                        | 2.326556264                         |
| 97.61954887                             | 0.384749023                              | 0.219137317                                        | 2.476671378                         |
| 97.16102564                             | 0.466826431                              | 0.262697699                                        | 1.796338199                         |
| 187.7218789                             | 0.485891327                              | 0.276298013                                        | 1.587001853                         |
| 174.5211105                             | 0.459332949                              | 0.265051058                                        | 1.675801596                         |
| 89.60194175                             | 0.461528471                              | 0.255836731                                        | 2.047717445                         |
| 539.9876219                             | 0.41497318                               | 0.223528783                                        | 3.415150074                         |
| 76.198188                               | 0.53068599                               | 0.313335189                                        | 1.203669668                         |
| 133.1483146                             | 0.504285862                              | 0.279607794                                        | 1.935041311                         |
| 317.2974607                             | 0.450092877                              | 0.246129469                                        | 2.2806443                           |
| 307.406664                              | 0.518472543                              | 0.304624053                                        | 1.270465361                         |
| 56.2556962                              | 0.402367476                              | 0.231161673                                        | 2.35866688                          |
| 283.8363542                             | 0.365565044                              | 0.188410976                                        | 4.29856754                          |
| 72.52300613                             | 0.447336695                              | 0.248281597                                        | 2.070794441                         |
| 236.31744                               | 0.522639091                              | 0.307594342                                        | 1.30688                             |
| 351.8891924                             | 0.447814084                              | 0.249547428                                        | 2.173454353                         |
| 177.8495514                             | 0.389125405                              | 0.230739317                                        | 1.864597131                         |
| 88.3656659                              | 0.382687619                              | 0.216102159                                        | 2.206189282                         |
| 156.8013986                             | 0.480704668                              | 0.272073179                                        | 1.84926837                          |
| 112.74638                               | 0.458622998                              | 0.237443734                                        | 3.234131734                         |
| 86.19876051                             | 0.560830259                              | 0.341057295                                        | 0.997843068                         |
| 163.5761737                             | 0.452336605                              | 0.256494308                                        | 2.037645816                         |
| 60.44411326                             | 0.521277349                              | 0.304629076                                        | 1.311395453                         |
| 119.7796327                             | 0.482649508                              | 0.271033944                                        | 1.786406671                         |
| 54.61169102                             | 0.452343665                              | 0.256211837                                        | 1.991705929                         |
| 110.4118336                             | 0.393440453                              | 0.232558036                                        | 2.015351516                         |
| 100.1979478                             | 0.516304459                              | 0.305972431                                        | 1.238563306                         |
| 62.46505782                             | 0.578423469                              | 0.35065889                                         | 1.101679145                         |
| 103.65592                               | 0.44580781                               | 0.239864899                                        | 2.330440511                         |
| 311.6197614                             | 0.32950744                               | 0.165024839                                        | 5.333346684                         |
| 269.4907257                             | 0.303450107                              | 0.17341014                                         | 3.667406272                         |
| 110.2578926                             | 0.500747316                              | 0.293998828                                        | 1.325575363                         |
| 154.0665796                             | 0.295905929                              | 0.152311182                                        | 5.484698921                         |
| 142.8406709                             | 0.435156907                              | 0.237407451                                        | 2.762066198                         |
| 192.3333333                             | 0.389260946                              | 0.199086155                                        | 3.443524056                         |
| 100.8661202                             | 0.399556194                              | 0.214604049                                        | 2.529181224                         |
| 116.0735802                             | 0.428982757                              | 0.226598872                                        | 2.973087273                         |
| 99.86809816                             | 0.362663719                              | 0.184084365                                        | 3.990797546                         |
| 102.3618808                             | 0.517663192                              | 0.30904679                                         | 1.161707489                         |
| 252.7626857                             | 0.479301103                              | 0.273494817                                        | 1.627389577                         |
| 197.9460606                             | 0.418217839                              | 0.236517539                                        | 2.064703765                         |
| 229.5487132                             | 0.428098629                              | 0.253528001                                        | 1.777324954                         |
| 163.5429573                             | 0.488021155                              | 0.275583164                                        | 2.071205979                         |
| 137.0539581                             | 0.455840521                              | 0.252851337                                        | 2.12684839                          |
| 56.82234957                             | 0.449889819                              | 0.244311988                                        | 2.133695308                         |
| 71.04796163                             | 0.347198871                              | 0.179045253                                        | 4.549551726                         |
| 278.6446138                             | 0.443621458                              | 0.245272244                                        | 2.137765786                         |

| wavelet.LHL_gldm_LargeDependenceEmphasis | wavelet.LHL_gldm_LargeDependenceLowGrayLevelEmphasis | wavelet.LHL_gldm_SmallDependenceHighGrayLevelEmphasis | wavelet.LHL_gldm_LargeDependenceHighGrayLevelEmphasis |
|------------------------------------------|------------------------------------------------------|-------------------------------------------------------|-------------------------------------------------------|
| 4.501413761                              | 0.004126016                                          | 923.3797623                                           | 7650.975024                                           |
| 7.382887701                              | 0.006408523                                          | 602.3257471                                           | 10932.85989                                           |
| 9.610169492                              | 0.020160961                                          | 223.9047027                                           | 5381.683181                                           |
| 7.360286592                              | 0.004031424                                          | 1095.177595                                           | 18692.74821                                           |
| 7.382601351                              | 0.012741434                                          | 305.5715071                                           | 5175.164274                                           |
| 4.406606066                              | 0.011668388                                          | 371.3917692                                           | 2934.786364                                           |
| 7.777207574                              | 0.006027097                                          | 673.5853863                                           | 11065.76358                                           |
| 11.08966327                              | 0.007492297                                          | 616.4487019                                           | 17371.96222                                           |
| 10.15310163                              | 0.009828886                                          | 449.0969256                                           | 11456.67818                                           |
| 6.201492537                              | 0.00689018                                           | 550.4959119                                           | 7300.229478                                           |
| 8.377984085                              | 0.018478637                                          | 223.3623324                                           | 4584.304377                                           |
| 7.027765727                              | 0.00825352                                           | 864.6307523                                           | 11881.28373                                           |
| 19.44884842                              | 0.013998829                                          | 524.2009043                                           | 29790.45367                                           |
| 8.472335469                              | 0.008951413                                          | 475.5566143                                           | 9249.740827                                           |
| 6.222782258                              | 0.00373735                                           | 1151.220846                                           | 13893.87802                                           |
| 7.98857404                               | 0.004620334                                          | 852.9121522                                           | 15099.89008                                           |
| 5.150753769                              | 0.010140322                                          | 927.3302181                                           | 8779.788107                                           |
| 11.22871046                              | 0.013671921                                          | 328.8579818                                           | 10683.27088                                           |
| 8.996918336                              | 0.033602505                                          | 129.0246609                                           | 3151.791217                                           |
| 6.242546644                              | 0.002681829                                          | 1294.144563                                           | 16379.07444                                           |
| 19.57804233                              | 0.034755389                                          | 167.0197217                                           | 11566.52315                                           |
| 6.366079703                              | 0.010220309                                          | 359.4683249                                           | 5090.52734                                            |
| 5.05078125                               | 0.016511381                                          | 373.4806573                                           | 3753.311523                                           |
| 7.149603325                              | 0.013306482                                          | 287.6574519                                           | 4556.420098                                           |
| 6.83503535                               | 0.005096753                                          | 855.6059239                                           | 11883.39827                                           |
| 7.317433516                              | 0.011568328                                          | 459.8227683                                           | 7176.110173                                           |
| 6.248376121                              | 0.00466179                                           | 799.4746955                                           | 9940.192082                                           |
| 8.606082549                              | 0.006124405                                          | 672.188761                                            | 13432.26539                                           |
| 5.129753915                              | 0.005612672                                          | 802.462523                                            | 8346.422819                                           |
| 7.168451801                              | 0.006386285                                          | 606.2756156                                           | 10139.70545                                           |
| 13.44010088                              | 0.018756334                                          | 295.3752583                                           | 10848.11749                                           |
| 7.206863219                              | 0.007022143                                          | 497.6907823                                           | 8652.318995                                           |
| 6.48405079                               | 0.004127413                                          | 930.6579534                                           | 11863.37721                                           |
| 5.540425532                              | 0.008033925                                          | 426.831183                                            | 4939.32383                                            |
| 7.18982743                               | 0.007605907                                          | 455.5031859                                           | 7523.143506                                           |
| 11.32210737                              | 0.014151337                                          | 314.22699                                             | 9782.689897                                           |
| 9.573501747                              | 0.006425462                                          | 662.2079017                                           | 15535.90836                                           |
| 12.2408448                               | 0.008005814                                          | 685.6484205                                           | 20057.98276                                           |
| 5.749593496                              | 0.006560164                                          | 543.2551817                                           | 6480.039837                                           |
| 6.400275103                              | 0.002882152                                          | 1212.154364                                           | 15761.79574                                           |
| 10.3924441                               | 0.015229084                                          | 278.8809773                                           | 7855.234002                                           |
| 4.43958676                               | 0.004719242                                          | 691.3093353                                           | 5432.176881                                           |
| 8.121270189                              | 0.006092586                                          | 617.4501449                                           | 12260.68382                                           |
| 5.026527331                              | 0.004155605                                          | 798.8428594                                           | 7724.733923                                           |
| 5.791862285                              | 0.023838947                                          | 352.4526367                                           | 4165.328638                                           |
| 7.716939891                              | 0.008487387                                          | 440.5492172                                           | 7899.740619                                           |
| 8.680403332                              | 0.003779321                                          | 1059.153281                                           | 21712.97918                                           |
| 8.150401837                              | 0.003981406                                          | 1245.228248                                           | 24397.07348                                           |
| 5.925969448                              | 0.003275607                                          | 1417.07802                                            | 17466.36898                                           |
| 10.73816568                              | 0.041552                                             | 143.9678353                                           | 3277.952663                                           |
| 5.913195796                              | 0.001541482                                          | 2663.964562                                           | 31161.51849                                           |
| 4.490358944                              | 0.004798322                                          | 705.0432402                                           | 5773.640759                                           |
| 8.665691489                              | 0.009770061                                          | 406.1086839                                           | 6023.469193                                           |
| 9.141304348                              | 0.0081392                                            | 468.2666763                                           | 11949.5                                               |
| 9.260150376                              | 0.032851091                                          | 141.6996725                                           | 3232.1                                                |
| 6.846153846                              | 0.003551155                                          | 1135.083064                                           | 17042.2241                                            |
| 6.245982695                              | 0.00573618                                           | 606.2206478                                           | 7846.903585                                           |
| 6.654713707                              | 0.006587457                                          | 526.0607217                                           | 7869.6631                                             |
| 7.370145631                              | 0.009894709                                          | 421.5962289                                           | 6514.225121                                           |
| 10.33881038                              | 0.01026791                                           | 519.4490784                                           | 12130.98291                                           |
| 5.06002265                               | 0.005127771                                          | 659.4962623                                           | 6409.532843                                           |
| 6.67340824                               | 0.003600883                                          | 1129.585665                                           | 14834.77491                                           |
| 7.947659354                              | 0.010141103                                          | 406.5975092                                           | 7161.950596                                           |
| 5.293060475                              | 0.003382387                                          | 927.62249                                             | 9783.967073                                           |
| 8.678481013                              | 0.019262358                                          | 225.539384                                            | 4828.086076                                           |
| 13.20559296                              | 0.013344803                                          | 384.6480189                                           | 13866.24858                                           |
| 7.613496933                              | 0.012564813                                          | 352.4071259                                           | 6139.266871                                           |
| 5.30688                                  | 0.0037998                                            | 863.8145691                                           | 9082.83936                                            |
| 7.727334813                              | 0.011364514                                          | 341.2868386                                           | 6071.758067                                           |
| 8.026915114                              | 0.013367259                                          | 271.2324949                                           | 5580.356453                                           |
| 8.964588145                              | 0.021491105                                          | 213.3033014                                           | 4525.95766                                            |
| 6.722144522                              | 0.005017751                                          | 813.4251566                                           | 11327.20513                                           |
| 9.59763054                               | 0.003432958                                          | 1524.459207                                           | 31650.39754                                           |
| 4.420097388                              | 0.004715569                                          | 680.8895866                                           | 5541.922089                                           |
| 7.374321303                              | 0.011861255                                          | 343.0555548                                           | 5312.998403                                           |
| 5.347242921                              | 0.005698078                                          | 638.8427994                                           | 6861.964978                                           |
| 6.635225376                              | 0.005615379                                          | 644.0445669                                           | 9378.492487                                           |
| 7.342379958                              | 0.00631834                                           | 687.4402737                                           | 11153.1858                                            |
| 8.176332748                              | 0.013245909                                          | 279.6123579                                           | 6022.26655                                            |
| 5.236853356                              | 0.004736557                                          | 703.3559929                                           | 7104.248824                                           |
| 4.471091001                              | 0.008479677                                          | 831.2788164                                           | 6758.851684                                           |
| 8.190661479                              | 0.008335879                                          | 515.0320114                                           | 9528.419678                                           |
| 16.286632                                | 0.015774615                                          | 369.2185015                                           | 17495.00673                                           |
| 13.5961601                               | 0.062858207                                          | 73.17041692                                           | 3301.294175                                           |
| 5.556785568                              | 0.00770302                                           | 446.5108871                                           | 4933.915539                                           |
| 17.8537859                               | 0.027312182                                          | 202.286707                                            | 12275.53068                                           |
| 8.925366876                              | 0.008993472                                          | 485.326674                                            | 9881.718658                                           |
| 11.34573304                              | 0.016646618                                          | 320.1982096                                           | 8454.033917                                           |
| 9.366120219                              | 0.013468154                                          | 312.1907727                                           | 7275.838798                                           |
| 9.574814815                              | 0.006549163                                          | 749.7358007                                           | 16050.06272                                           |
| 12.99079755                              | 0.012810196                                          | 465.9916136                                           | 15479.30061                                           |
| 5.088161209                              | 0.004042557                                          | 764.6026083                                           | 8025.943745                                           |
| 6.366390122                              | 0.007502398                                          | 499.2285839                                           | 6668.813236                                           |
| 7.976969697                              | 0.00872041                                           | 420.7400101                                           | 8098.372121                                           |
| 7.165441176                              | 0.009310055                                          | 378.6843432                                           | 6373.727711                                           |
| 6.959672706                              | 0.006016026                                          | 648.5736513                                           | 9110.081239                                           |
| 7.567980121                              | 0.007564199                                          | 538.0416375                                           | 8893.447994                                           |
| 7.785100287                              | 0.007022143                                          | 643.9601696                                           | 11203.52722                                           |
| 14.13429257                              | 0.054340652                                          | 111.9020605                                           | 4214.142686                                           |
| 7.772428126                              | 0.004498742                                          | 872.3810208                                           | 14853.62816                                           |

| wavelet.LHL_gldm_SmallDependenceLowGrayLevelEmphasis | wavelet.LHL_gldm_LowGrayLevelEmphasis | wavelet.LHL_gldm_DistanceZoneVariabilityNormalized | wavelet.LHL_gldm_LowIntensityEmphasis |
|------------------------------------------------------|---------------------------------------|----------------------------------------------------|---------------------------------------|
| 0.001054611                                          | 0.001438777                           | 1                                                  | 0.001743154                           |
| 0.001467413                                          | 0.001889118                           | 1                                                  | 0.003068092                           |
| 0.002052346                                          | 0.003325684                           | 1                                                  | 0.004794752                           |
| 0.001240489                                          | 0.001466024                           | 1                                                  | 0.002453617                           |
| 0.001501689                                          | 0.002480082                           | 1                                                  | 0.003274546                           |
| 0.004760412                                          | 0.005611924                           | 1                                                  | 0.007755                              |
| 0.00064545                                           | 0.001046299                           | 0.993261533                                        | 0.001328302                           |
| 0.000510351                                          | 0.000916954                           | 0.998232436                                        | 0.001238723                           |
| 0.000743427                                          | 0.001327464                           | 0.999025341                                        | 0.001776184                           |
| 0.001541037                                          | 0.00204019                            | 1                                                  | 0.002877866                           |
| 0.001796165                                          | 0.003202383                           | 1                                                  | 0.004264993                           |
| 0.000639896                                          | 0.001672774                           | 0.995395266                                        | 0.001638916                           |
| 0.000965547                                          | 0.001494527                           | 1                                                  | 0.002809609                           |
| 0.001146232                                          | 0.001731958                           | 1                                                  | 0.002546456                           |
| 0.000915475                                          | 0.001181016                           | 1                                                  | 0.001653126                           |
| 0.000503842                                          | 0.00080766                            | 1                                                  | 0.001052488                           |
| 0.000946506                                          | 0.002505303                           | 1                                                  | 0.002356417                           |
| 0.001966052                                          | 0.002656845                           | 1                                                  | 0.004992357                           |
| 0.003938571                                          | 0.006493976                           | 1                                                  | 0.009835156                           |
| 0.0004262                                            | 0.00062624                            | 0.997971605                                        | 0.000801583                           |
| 0.001314189                                          | 0.002571664                           | 0.995731076                                        | 0.004450508                           |
| 0.002440201                                          | 0.003145553                           | 0.996598649                                        | 0.004664112                           |
| 0.003487415                                          | 0.005138316                           | 1                                                  | 0.00647289                            |
| 0.00205259                                           | 0.002983762                           | 1                                                  | 0.004144748                           |
| 0.001283546                                          | 0.00159674                            | 1                                                  | 0.002393065                           |
| 0.000914941                                          | 0.002143339                           | 1                                                  | 0.002279635                           |
| 0.000796215                                          | 0.001138457                           | 1                                                  | 0.001444904                           |
| 0.000709829                                          | 0.001092251                           | 1                                                  | 0.001540192                           |
| 0.002582652                                          | 0.002923305                           | 1                                                  | 0.004611684                           |
| 0.001414719                                          | 0.001834779                           | 1                                                  | 0.002847053                           |
| 0.001285917                                          | 0.00224696                            | 1                                                  | 0.003451236                           |
| 0.001004426                                          | 0.001523638                           | 1                                                  | 0.002117124                           |
| 0.000651743                                          | 0.000947259                           | 0.998929336                                        | 0.001209666                           |
| 0.001446569                                          | 0.00215574                            | 1                                                  | 0.002739234                           |
| 0.00081737                                           | 0.001389334                           | 0.989556424                                        | 0.001720228                           |
| 0.000988458                                          | 0.001787014                           | 0.996763763                                        | 0.002583101                           |
| 0.000644798                                          | 0.001027805                           | 1                                                  | 0.001483006                           |
| 0.000542552                                          | 0.000925519                           | 0.993437315                                        | 0.001250402                           |
| 0.001540133                                          | 0.002038953                           | 1                                                  | 0.002836971                           |
| 0.000391123                                          | 0.000609579                           | 0.999033116                                        | 0.000749363                           |
| 0.001292373                                          | 0.00220285                            | 1                                                  | 0.00321006                            |
| 0.001116866                                          | 0.001545855                           | 0.995194261                                        | 0.001871502                           |
| 0.00071023                                           | 0.001135814                           | 1                                                  | 0.001561434                           |
| 0.00093556                                           | 0.001284233                           | 1                                                  | 0.001610097                           |
| 0.002631728                                          | 0.005371293                           | 1                                                  | 0.005375505                           |
| 0.000943574                                          | 0.001550767                           | 1                                                  | 0.002039674                           |
| 0.000411299                                          | 0.000647163                           | 0.999087175                                        | 0.00090888                            |
| 0.001359263                                          | 0.00155628                            | 1                                                  | 0.002833519                           |
| 0.001388099                                          | 0.001565391                           | 1                                                  | 0.00241217                            |
| 0.004000991                                          | 0.006431983                           | 0.996509609                                        | 0.010059364                           |
| 0.00049699                                           | 0.000593271                           | 1                                                  | 0.000876941                           |
| 0.001035106                                          | 0.001495609                           | 0.999076639                                        | 0.001769842                           |
| 0.001384869                                          | 0.002180711                           | 0.996692857                                        | 0.002843866                           |
| 0.001256893                                          | 0.001751664                           | 1                                                  | 0.002995637                           |
| 0.004107681                                          | 0.006257327                           | 1                                                  | 0.009792461                           |
| 0.000890968                                          | 0.001120132                           | 1                                                  | 0.001700127                           |
| 0.00080002                                           | 0.001254659                           | 0.993857013                                        | 0.001554483                           |
| 0.000948034                                          | 0.001467391                           | 1                                                  | 0.001913132                           |
| 0.001532707                                          | 0.002202353                           | 1                                                  | 0.00309091                            |
| 0.000612845                                          | 0.001309423                           | 0.998155409                                        | 0.001530825                           |
| 0.00119185                                           | 0.00161699                            | 0.996350377                                        | 0.002060368                           |
| 0.00074044                                           | 0.000974575                           | 1                                                  | 0.001350149                           |
| 0.001267802                                          | 0.00193896                            | 0.98870093                                         | 0.002625346                           |
| 0.000572198                                          | 0.00086355                            | 0.981419093                                        | 0.001038662                           |
| 0.002462199                                          | 0.003863759                           | 1                                                  | 0.005623415                           |
| 0.000754277                                          | 0.001394068                           | 0.992495416                                        | 0.00196117                            |
| 0.002193959                                          | 0.003142818                           | 1                                                  | 0.004526467                           |
| 0.000682483                                          | 0.001010499                           | 0.993139923                                        | 0.001230571                           |
| 0.001460468                                          | 0.002247323                           | 1                                                  | 0.003048747                           |
| 0.001328915                                          | 0.00234504                            | 1                                                  | 0.003190464                           |
| 0.002811073                                          | 0.004215833                           | 1                                                  | 0.006708184                           |
| 0.00078836                                           | 0.001153866                           | 0.994970694                                        | 0.001523963                           |
| 0.000602998                                          | 0.000771857                           | 1                                                  | 0.001211893                           |
| 0.00121409                                           | 0.00163107                            | 0.995912824                                        | 0.002007341                           |
| 0.001259322                                          | 0.002139996                           | 0.995198107                                        | 0.002631775                           |
| 0.001550142                                          | 0.001985984                           | 1                                                  | 0.002714902                           |
| 0.00103991                                           | 0.001438317                           | 1                                                  | 0.001981636                           |
| 0.001597797                                          | 0.001981566                           | 1                                                  | 0.003137865                           |
| 0.002018213                                          | 0.002937176                           | 1                                                  | 0.00464899                            |
| 0.000981172                                          | 0.001379781                           | 1                                                  | 0.001759266                           |
| 0.00152069                                           | 0.002652069                           | 1                                                  | 0.002807237                           |
| 0.001326321                                          | 0.001847238                           | 1                                                  | 0.002750128                           |
| 0.000667438                                          | 0.001312593                           | 0.996686007                                        | 0.001922319                           |
| 0.002467804                                          | 0.005856376                           | 1                                                  | 0.007948439                           |
| 0.001290289                                          | 0.001949855                           | 0.995774667                                        | 0.002417265                           |
| 0.001241823                                          | 0.002310212                           | 1                                                  | 0.003994397                           |
| 0.001004775                                          | 0.001560317                           | 1                                                  | 0.002150123                           |
| 0.001225566                                          | 0.002111118                           | 1                                                  | 0.002993062                           |
| 0.001405961                                          | 0.002234766                           | 1                                                  | 0.003270794                           |
| 0.000934688                                          | 0.001283386                           | 1                                                  | 0.001983091                           |
| 0.001981754                                          | 0.002530978                           | 0.992495416                                        | 0.004966382                           |
| 0.000863878                                          | 0.001217244                           | 0.997202803                                        | 0.001549077                           |
| 0.001234348                                          | 0.001832729                           | 0.988182552                                        | 0.002412476                           |
| 0.000855378                                          | 0.001490731                           | 1                                                  | 0.001929053                           |
| 0.000933574                                          | 0.001677564                           | 0.997259028                                        | 0.002073609                           |
| 0.00081241                                           | 0.001228576                           | 0.998952331                                        | 0.001564809                           |
| 0.001064807                                          | 0.001586631                           | 1                                                  | 0.002163198                           |
| 0.00151683                                           | 0.001953047                           | 1                                                  | 0.00304614                            |
| 0.003694271                                          | 0.006443069                           | 1                                                  | 0.010051288                           |
| 0.000475453                                          | 0.000789713                           | 0.997986579                                        | 0.001006913                           |

| wavelet.LHL_gldzm_LargeDistanceEmphasis | wavelet.LHL_gldzm_HighIntensitySmallDistanceEmphasis | wavelet.LHL_gldzm_LowIntensityLargeDistanceEmphasis | wavelet.LHL_gldzm_HighIntensityEmphasis |
|-----------------------------------------|------------------------------------------------------|-----------------------------------------------------|-----------------------------------------|
| 1                                       | 1615.737258                                          | 0.001743154                                         | 1615.737258                             |
| 1                                       | 1434.047312                                          | 0.003068092                                         | 1434.047312                             |
| 1                                       | 567.2320675                                          | 0.004794752                                         | 567.2320675                             |
| 1                                       | 2524.150198                                          | 0.002453617                                         | 2524.150198                             |
| 1                                       | 712.4507161                                          | 0.003274546                                         | 712.4507161                             |
| 1                                       | 680.3                                                | 0.007755                                            | 680.3                                   |
| 1.010141988                             | 1474.357843                                          | 0.001335694                                         | 1478.140297                             |
| 1.002653693                             | 1582.025763                                          | 0.001240492                                         | 1583.074303                             |
| 1.001462701                             | 1132.558386                                          | 0.001777706                                         | 1132.9098                               |
| 1                                       | 1141.573554                                          | 0.002877866                                         | 1141.573554                             |
| 1                                       | 549.2920228                                          | 0.004264993                                         | 549.2920228                             |
| 1.006923077                             | 1742.757308                                          | 0.001642292                                         | 1746.316923                             |
| 1                                       | 1581.008889                                          | 0.002809609                                         | 1581.008889                             |
| 1                                       | 1141.296703                                          | 0.002546456                                         | 1141.296703                             |
| 1                                       | 2267.848616                                          | 0.001653126                                         | 2267.848616                             |
| 1                                       | 1911.679858                                          | 0.001052488                                         | 1911.679858                             |
| 1                                       | 1790.67872                                           | 0.002356417                                         | 1790.67872                              |
| 1                                       | 934.4649299                                          | 0.004992357                                         | 934.4649299                             |
| 1                                       | 339.6265271                                          | 0.009835156                                         | 339.6265271                             |
| 1.003045685                             | 2609.836464                                          | 0.000802327                                         | 2613.256514                             |
| 1.006417112                             | 598.1604278                                          | 0.00446967                                          | 598.7540107                             |
| 1.005110733                             | 768.1601363                                          | 0.004676889                                         | 768.6712095                             |
| 1                                       | 718.6335505                                          | 0.00647289                                          | 718.6335505                             |
| 1                                       | 631.6889368                                          | 0.004144748                                         | 631.6889368                             |
| 1                                       | 1784.536827                                          | 0.002393065                                         | 1784.536827                             |
| 1                                       | 1003.282072                                          | 0.002279635                                         | 1003.282072                             |
| 1                                       | 1554.934623                                          | 0.001444904                                         | 1554.934623                             |
| 1                                       | 1584.064397                                          | 0.001540192                                         | 1584.064397                             |
| 1                                       | 1641.492188                                          | 0.004611684                                         | 1641.492188                             |
| 1                                       | 1358.399247                                          | 0.002847053                                         | 1358.399247                             |
| 1                                       | 828.91                                               | 0.003451236                                         | 828.91                                  |
| 1                                       | 1147.693916                                          | 0.002117124                                         | 1147.693916                             |
| 1.001606856                             | 1857.145287                                          | 0.001210622                                         | 1857.820568                             |
| 1                                       | 867.5599112                                          | 0.002739234                                         | 867.5599112                             |
| 1.015748031                             | 1015.861111                                          | 0.001755131                                         | 1018.8014                               |
| 1.004862237                             | 875.3219206                                          | 0.002589554                                         | 876.338736                              |
| 1                                       | 1635.293294                                          | 0.001483006                                         | 1635.293294                             |
| 1.009876543                             | 1703.825                                             | 0.001258235                                         | 1707.146914                             |
| 1                                       | 1107.668085                                          | 0.002836971                                         | 1107.668085                             |
| 1.001451028                             | 2478.028053                                          | 0.000750097                                         | 2478.858767                             |
| 1                                       | 742.69375                                            | 0.00321006                                          | 742.69375                               |
| 1.007226014                             | 1232.353473                                          | 0.001880655                                         | 1234.405058                             |
| 1                                       | 1462.980545                                          | 0.001561434                                         | 1462.980545                             |
| 1                                       | 1490.77892                                           | 0.001610097                                         | 1490.77892                              |
| 1                                       | 713                                                  | 0.005375505                                         | 713                                     |
| 1                                       | 1025.018827                                          | 0.002039674                                         | 1025.018827                             |
| 1.001369863                             | 2525.77226                                           | 0.000909333                                         | 2526.808219                             |
| 1                                       | 2988.912941                                          | 0.002833519                                         | 2988.912941                             |
| 1                                       | 2845.742515                                          | 0.00241217                                          | 2845.742515                             |
| 1.005244755                             | 384.4248252                                          | 0.010072476                                         | 384.9493007                             |
| 1                                       | 5252.830779                                          | 0.000876941                                         | 5252.830779                             |
| 1.001385681                             | 1276.061894                                          | 0.00172705                                          | 1276.229561                             |
| 1.004968944                             | 881.3098344                                          | 0.002850486                                         | 882.3175983                             |
| 1                                       | 1263.394191                                          | 0.002995637                                         | 1263.394191                             |
| 1                                       | 370.8771044                                          | 0.009792461                                         | 370.8771044                             |
| 1                                       | 2443.50047                                           | 0.001700127                                         | 2443.50047                              |
| 1.009242958                             | 1244.172095                                          | 0.001561807                                         | 1247.319982                             |
| 1                                       | 1145.902517                                          | 0.001913132                                         | 1145.902517                             |
| 1                                       | 919.8294664                                          | 0.00309091                                          | 919.8294664                             |
| 1.002769444                             | 1251.701304                                          | 0.001534596                                         | 1252.597046                             |
| 1.005484461                             | 1243.133455                                          | 0.002067806                                         | 1244.230347                             |
| 1                                       | 2243.020888                                          | 0.001350149                                         | 2243.020888                             |
| 1.017045455                             | 904.5326705                                          | 0.002648351                                         | 908.6233289                             |
| 1.028135224                             | 1785.434188                                          | 0.001064244                                         | 1796.313195                             |
| 1                                       | 561.1552632                                          | 0.005623415                                         | 561.1552632                             |
| 1.011299435                             | 1054.353578                                          | 0.002012347                                         | 1056.286252                             |
| 1                                       | 789.7510981                                          | 0.004526467                                         | 789.7510981                             |
| 1.010325655                             | 1656.729415                                          | 0.001236715                                         | 1661.966905                             |
| 1                                       | 767.8153693                                          | 0.003048747                                         | 767.8153693                             |
| 1                                       | 696.9563253                                          | 0.003190464                                         | 696.9563253                             |
| 1                                       | 556.4652778                                          | 0.006708184                                         | 556.4652778                             |
| 1.007563025                             | 1704.88687                                           | 0.001529633                                         | 1707.660924                             |
| 1                                       | 3331.287307                                          | 0.001211893                                         | 3331.287307                             |
| 1.006143345                             | 1220.147611                                          | 0.002013483                                         | 1221.972696                             |
| 1.007220217                             | 757.0415162                                          | 0.002645507                                         | 758.2743682                             |
| 1                                       | 1226.993781                                          | 0.002714902                                         | 1226.993781                             |
| 1                                       | 1340.078137                                          | 0.001981636                                         | 1340.078137                             |
| 1                                       | 1523.550495                                          | 0.003137865                                         | 1523.550495                             |
| 1                                       | 708.3014049                                          | 0.00464899                                          | 708.3014049                             |
| 1                                       | 1355.675695                                          | 0.001759266                                         | 1355.675695                             |
| 1                                       | 1446.875285                                          | 0.002807237                                         | 1446.875285                             |
| 1                                       | 1156.705947                                          | 0.002750128                                         | 1156.705947                             |
| 1.004979253                             | 1119.556224                                          | 0.001930118                                         | 1120.550207                             |
| 1                                       | 241.4124294                                          | 0.007948439                                         | 241.4124294                             |
| 1.006351447                             | 890.4124912                                          | 0.002427544                                         | 891.4446013                             |
| 1                                       | 687.1227364                                          | 0.003994397                                         | 687.1227364                             |
| 1                                       | 1114.580537                                          | 0.002150123                                         | 1114.580537                             |
| 1                                       | 821.215604                                           | 0.002993062                                         | 821.215604                              |
| 1                                       | 785.6146927                                          | 0.003270794                                         | 785.6146927                             |
| 1                                       | 1755.645519                                          | 0.001983091                                         | 1755.645519                             |
| 1.011299435                             | 1281.601224                                          | 0.004975179                                         | 1285.693032                             |
| 1.004201681                             | 1485.453957                                          | 0.001553081                                         | 1486.565826                             |
| 1.017832168                             | 1035.726399                                          | 0.003483364                                         | 1040.590909                             |
| 1                                       | 1007.150685                                          | 0.001929053                                         | 1007.150685                             |
| 1.004117109                             | 884.1108188                                          | 0.002078483                                         | 885.2557182                             |
| 1.001572327                             | 1332.05097                                           | 0.001565521                                         | 1332.919287                             |
| 1                                       | 1180.708614                                          | 0.002163198                                         | 1180.708614                             |
| 1                                       | 1436.729282                                          | 0.00304614                                          | 1436.729282                             |
| 1                                       | 318.9131737                                          | 0.010051288                                         | 318.9131737                             |
| 1.003023178                             | 1960.04392                                           | 0.001009705                                         | 1960.963722                             |

| wavelet.LHL_gldzm_DistanceZoneVariability | wavelet.LHL_gldzm_ZonePercentage | wavelet.LHL_gldzm_IntensityVariabilityNormalized | wavelet.LHL_gldzm_LowIntensitySmallDistanceEmphasis | wavelet.LHL_gldzm_IntensityVariability |
|-------------------------------------------|----------------------------------|--------------------------------------------------|-----------------------------------------------------|----------------------------------------|
| 1393                                      | 0.656456173                      | 0.028212543                                      | 0.001743154                                         | 39.30007179                            |
| 465                                       | 0.497326203                      | 0.041359695                                      | 0.003068092                                         | 19.23225806                            |
| 711                                       | 0.463494133                      | 0.043865636                                      | 0.004794752                                         | 31.18846695                            |
| 506                                       | 0.517911975                      | 0.039916262                                      | 0.002453617                                         | 20.19762846                            |
| 1187                                      | 0.501266892                      | 0.039875256                                      | 0.003274546                                         | 47.33192923                            |
| 420                                       | 0.636363636                      | 0.035770975                                      | 0.007755                                            | 15.02380952                            |
| 2938.067613                               | 0.523447177                      | 0.037974053                                      | 0.001326454                                         | 112.3272481                            |
| 2257.003538                               | 0.442638998                      | 0.043387666                                      | 0.001238281                                         | 98.09951349                            |
| 2049.000975                               | 0.45116586                       | 0.042279979                                      | 0.001775803                                         | 86.71623598                            |
| 605                                       | 0.564365672                      | 0.040601052                                      | 0.002877866                                         | 24.56363636                            |
| 702                                       | 0.465517241                      | 0.049910309                                      | 0.004264993                                         | 35.03703704                            |
| 1294.013846                               | 0.563991323                      | 0.034880473                                      | 0.001638072                                         | 45.34461538                            |
| 675                                       | 0.361542582                      | 0.041224691                                      | 0.002809609                                         | 27.82666667                            |
| 819                                       | 0.476994758                      | 0.038751508                                      | 0.002546456                                         | 31.73748474                            |
| 1156                                      | 0.58266129                       | 0.030514781                                      | 0.001653126                                         | 35.27508651                            |
| 2249                                      | 0.513939671                      | 0.039575516                                      | 0.001052488                                         | 89.0053357                             |
| 719                                       | 0.602177554                      | 0.033079865                                      | 0.002356417                                         | 23.78442281                            |
| 499                                       | 0.404703974                      | 0.045746804                                      | 0.004992357                                         | 22.82765531                            |
| 573                                       | 0.441448382                      | 0.053772283                                      | 0.009835156                                         | 30.81151832                            |
| 2949.006091                               | 0.568378534                      | 0.034308079                                      | 0.000801398                                         | 101.3803723                            |
| 931.0085561                               | 0.309193122                      | 0.052166204                                      | 0.004445717                                         | 48.77540107                            |
| 585.0034072                               | 0.544022243                      | 0.043431069                                      | 0.004660918                                         | 25.49403748                            |
| 614                                       | 0.599609375                      | 0.032557375                                      | 0.00647289                                          | 19.99022801                            |
| 1392                                      | 0.525878353                      | 0.04503464                                       | 0.004144748                                         | 62.68821839                            |
| 706                                       | 0.554595444                      | 0.036983685                                      | 0.002393065                                         | 26.11048159                            |
| 1255                                      | 0.529759392                      | 0.039556261                                      | 0.002279635                                         | 49.65816733                            |
| 1912                                      | 0.591401175                      | 0.032595827                                      | 0.001444904                                         | 62.32322176                            |
| 1351                                      | 0.489138306                      | 0.041365855                                      | 0.001540192                                         | 55.88527017                            |
| 256                                       | 0.572706935                      | 0.042785645                                      | 0.004611684                                         | 10.953125                              |
| 1062                                      | 0.517039922                      | 0.039491277                                      | 0.002847053                                         | 41.93973635                            |
| 1900                                      | 0.399327449                      | 0.04100831                                       | 0.003451236                                         | 77.91578947                            |
| 1052                                      | 0.508458192                      | 0.039766731                                      | 0.002117124                                         | 41.83460076                            |
| 1865.001071                               | 0.578197584                      | 0.034683817                                      | 0.001209427                                         | 64.75468666                            |
| 1352                                      | 0.575319149                      | 0.036820314                                      | 0.002739234                                         | 49.78106509                            |
| 2262.125984                               | 0.519073569                      | 0.042412295                                      | 0.001711502                                         | 96.95450569                            |
| 1230.006483                               | 0.41147049                       | 0.044553428                                      | 0.002581488                                         | 54.97893031                            |
| 1715                                      | 0.460897608                      | 0.041554454                                      | 0.001483006                                         | 71.26588921                            |
| 2414.052675                               | 0.470838985                      | 0.034540128                                      | 0.001248444                                         | 83.93251029                            |
| 705                                       | 0.573170732                      | 0.04213269                                       | 0.002836971                                         | 29.7035461                             |
| 4131.001935                               | 0.568775791                      | 0.035330509                                      | 0.00074918                                          | 146.0916566                            |
| 1120                                      | 0.431765613                      | 0.042640306                                      | 0.00321006                                          | 47.75714286                            |
| 2479.028904                               | 0.644168606                      | 0.032368474                                      | 0.001869214                                         | 60.62986752                            |
| 1799                                      | 0.492471941                      | 0.038792165                                      | 0.001561434                                         | 69.78710395                            |
| 1556                                      | 0.625401929                      | 0.034024524                                      | 0.001610097                                         | 52.94215938                            |
| 737                                       | 0.576682316                      | 0.040851006                                      | 0.005375505                                         | 30.10719132                            |
| 1381                                      | 0.503096539                      | 0.04216267                                       | 0.002039674                                         | 28.22664736                            |
| 2188.000913                               | 0.480052609                      | 0.038860741                                      | 0.000908767                                         | 85.10502283                            |
| 425                                       | 0.487944891                      | 0.038937024                                      | 0.002833519                                         | 16.54823529                            |
| 501                                       | 0.588719154                      | 0.037724949                                      | 0.00241217                                          | 18.9001996                             |
| 570.0034965                               | 0.423076923                      | 0.046909384                                      | 0.010056086                                         | 26.83216783                            |
| 1501                                      | 0.584274037                      | 0.033176639                                      | 0.000876941                                         | 49.79813458                            |
| 2163.000924                               | 0.642242658                      | 0.030747617                                      | 0.001769127                                         | 66.56859122                            |
| 2407.013251                               | 0.535239362                      | 0.041472851                                      | 0.002842211                                         | 100.1569358                            |
| 482                                       | 0.436594203                      | 0.050464007                                      | 0.002995637                                         | 24.32365145                            |
| 594                                       | 0.446616541                      | 0.049252344                                      | 0.009792461                                         | 29.25589226                            |
| 1063                                      | 0.545128205                      | 0.036378874                                      | 0.001700127                                         | 38.67074318                            |
| 2258.043134                               | 0.561681088                      | 0.037145795                                      | 0.001552652                                         | 84.39524648                            |
| 1867                                      | 0.539907461                      | 0.039931556                                      | 0.001913132                                         | 74.55222282                            |
| 862                                       | 0.523058252                      | 0.038102723                                      | 0.00309091                                          | 32.84454756                            |
| 4325.007385                               | 0.474641253                      | 0.039603377                                      | 0.001529882                                         | 171.6014309                            |
| 1090.007313                               | 0.619479049                      | 0.037562373                                      | 0.002058508                                         | 41.09323583                            |
| 1532                                      | 0.573782772                      | 0.035453408                                      | 0.001350149                                         | 54.31462141                            |
| 2958.193182                               | 0.516842287                      | 0.039079926                                      | 0.002619595                                         | 116.927139                             |
| 4499.806543                               | 0.601469238                      | 0.033785244                                      | 0.001032266                                         | 154.9053435                            |
| 380                                       | 0.481012658                      | 0.048711911                                      | 0.005623415                                         | 18.51052632                            |
| 1581.045198                               | 0.41248058                       | 0.044406851                                      | 0.001948376                                         | 70.74011299                            |
| 683                                       | 0.523773006                      | 0.040800533                                      | 0.004526467                                         | 27.86676428                            |
| 3751.089489                               | 0.60432                          | 0.032504262                                      | 0.001229035                                         | 122.7685994                            |
| 3006                                      | 0.51323203                       | 0.045000042                                      | 0.003048747                                         | 135.2701264                            |
| 1328                                      | 0.458247067                      | 0.045298665                                      | 0.003190464                                         | 60.15662651                            |
| 576                                       | 0.443418014                      | 0.045096692                                      | 0.006708184                                         | 25.97569444                            |
| 2368.030252                               | 0.554778555                      | 0.028574959                                      | 0.001522546                                         | 68.00840336                            |
| 1166                                      | 0.511627907                      | 0.030414341                                      | 0.001211893                                         | 35.46312178                            |
| 1459.012287                               | 0.648517043                      | 0.032803178                                      | 0.002005806                                         | 48.05665529                            |
| 1654.019254                               | 0.530820824                      | 0.039889307                                      | 0.002628342                                         | 66.29602888                            |
| 804                                       | 0.599105812                      | 0.038619094                                      | 0.002714902                                         | 31.04975124                            |
| 1331                                      | 0.555509182                      | 0.038848789                                      | 0.001981636                                         | 51.70773854                            |
| 505                                       | 0.527139875                      | 0.042211548                                      | 0.003137865                                         | 21.31683168                            |
| 783                                       | 0.458699473                      | 0.047397686                                      | 0.00464899                                          | 37.11238825                            |
| 1403                                      | 0.598828987                      | 0.034889599                                      | 0.001759266                                         | 48.95010691                            |
| 1315                                      | 0.661136249                      | 0.028208591                                      | 0.002807237                                         | 37.09429658                            |
| 908                                       | 0.504724847                      | 0.038017427                                      | 0.002750128                                         | 34.51982379                            |
| 1201.006639                               | 0.368614255                      | 0.050432327                                      | 0.001920369                                         | 60.77095436                            |
| 1062                                      | 0.345590628                      | 0.060949919                                      | 0.007948439                                         | 64.72881356                            |
| 1411.012703                               | 0.58097581                       | 0.038127108                                      | 0.002414695                                         | 54.0261115                             |
| 497                                       | 0.324412533                      | 0.0571217473                                     | 0.003994397                                         | 28.39235412                            |
| 1192                                      | 0.499790356                      | 0.041929418                                      | 0.002150123                                         | 49.97986577                            |
| 1192                                      | 0.434719183                      | 0.041597225                                      | 0.002993062                                         | 49.58389262                            |
| 667                                       | 0.455601093                      | 0.047623115                                      | 0.003270794                                         | 31.76461769                            |
| 993                                       | 0.49037037                       | 0.036563092                                      | 0.001983091                                         | 36.30715005                            |
| 527.0150659                               | 0.407208589                      | 0.039973613                                      | 0.004964182                                         | 21.2259887                             |
| 1424.005602                               | 0.599496222                      | 0.037220771                                      | 0.001548077                                         | 53.1512605                             |
| 2826.202098                               | 0.551803975                      | 0.037805761                                      | 0.002144754                                         | 108.1244755                            |
| 1606                                      | 0.486666667                      | 0.043929288                                      | 0.001929053                                         | 70.55043587                            |
| 2180.008234                               | 0.502297794                      | 0.041924867                                      | 0.00207239                                          | 91.64775846                            |
| 1906.001048                               | 0.557568673                      | 0.035105415                                      | 0.001564631                                         | 66.98113208                            |
| 1486                                      | 0.527511537                      | 0.035766753                                      | 0.002163198                                         | 53.14939435                            |
| 543                                       | 0.518624642                      | 0.037181744                                      | 0.00304614                                          | 20.18968692                            |
| 334                                       | 0.400479616                      | 0.05656352                                       | 0.010051288                                         | 18.89221557                            |
| 2971.006046                               | 0.515587115                      | 0.03561884                                       | 0.001006215                                         | 106.0372859                            |

| wavelet.LHL_gldzm_HighIntensityLargeDistanceEmphasis | wavelet.LHL_gldzm_SmallDistanceEmphasis | wavelet.LHL_gldcm_SumVariance | wavelet.LHL_gldcm_Homogeneity1 | wavelet.LHL_gldcm_Homogeneity2 |
|------------------------------------------------------|-----------------------------------------|-------------------------------|--------------------------------|--------------------------------|
| 1615.737258                                          | 1                                       | 5664.52207                    | 0.201056166                    | 0.116516331                    |
| 1434.047312                                          | 1                                       | 4993.905037                   | 0.281860147                    | 0.191743052                    |
| 567.2320675                                          | 1                                       | 1827.833002                   | 0.297685316                    | 0.20952149                     |
| 2524.150198                                          | 1                                       | 9067.891753                   | 0.26936732                     | 0.181207792                    |
| 712.4507161                                          | 1                                       | 2224.387561                   | 0.272404232                    | 0.180931325                    |
| 680.3                                                | 1                                       | 2166.028263                   | 0.227436122                    | 0.138573742                    |
| 1493.270115                                          | 0.997464503                             | 5027.294837                   | 0.264433894                    | 0.176002247                    |
| 1587.268465                                          | 0.999336577                             | 5477.643664                   | 0.308143444                    | 0.221021747                    |
| 1134.315456                                          | 0.999634325                             | 3858.463801                   | 0.301676283                    | 0.214751856                    |
| 1141.573554                                          | 1                                       | 3836.412226                   | 0.251835535                    | 0.162548321                    |
| 549.2920228                                          | 1                                       | 1710.730305                   | 0.30562251                     | 0.21629344                     |
| 1760.555385                                          | 0.998269231                             | 5952.502738                   | 0.247352945                    | 0.16101461                     |
| 1581.008889                                          | 1                                       | 5464.180447                   | 0.361989748                    | 0.285210364                    |
| 1141.296703                                          | 1                                       | 3796.130729                   | 0.281890733                    | 0.193437679                    |
| 2267.848616                                          | 1                                       | 7853.500997                   | 0.233457432                    | 0.149466997                    |
| 1911.679858                                          | 1                                       | 6688.171044                   | 0.272609095                    | 0.183227121                    |
| 1790.67872                                           | 1                                       | 6178.934072                   | 0.230388064                    | 0.141127745                    |
| 934.4649299                                          | 1                                       | 3152.707179                   | 0.321925655                    | 0.236708928                    |
| 339.6265271                                          | 1                                       | 1042.967254                   | 0.310562625                    | 0.221229988                    |
| 2626.936717                                          | 0.999238579                             | 9290.425404                   | 0.241402259                    | 0.153784435                    |
| 601.1283422                                          | 0.998395722                             | 1990.070866                   | 0.391954823                    | 0.3142145                      |
| 770.7155026                                          | 0.998722317                             | 2551.852934                   | 0.262020157                    | 0.169812883                    |
| 718.6335505                                          | 1                                       | 2340.653025                   | 0.236138527                    | 0.146841058                    |
| 631.6889368                                          | 1                                       | 2074.985775                   | 0.277411089                    | 0.186814739                    |
| 1784.536827                                          | 1                                       | 6070.4567                     | 0.256640831                    | 0.171077545                    |
| 1003.282072                                          | 1                                       | 3300.001469                   | 0.271277493                    | 0.182521562                    |
| 1554.934623                                          | 1                                       | 5374.011823                   | 0.232959429                    | 0.145944684                    |
| 1584.064397                                          | 1                                       | 5468.882991                   | 0.281472405                    | 0.192350139                    |
| 1641.492188                                          | 1                                       | 5738.361038                   | 0.242120605                    | 0.149555827                    |
| 1358.399247                                          | 1                                       | 4812.771094                   | 0.268675125                    | 0.177490613                    |
| 828.91                                               | 1                                       | 2669.356684                   | 0.326141366                    | 0.243321339                    |
| 1147.693916                                          | 1                                       | 3962.459685                   | 0.264516812                    | 0.174243292                    |
| 1860.521693                                          | 0.999598286                             | 6399.581143                   | 0.242223662                    | 0.153420977                    |
| 867.5599112                                          | 1                                       | 2839.500662                   | 0.23949408                     | 0.149918321                    |
| 1030.562555                                          | 0.996062992                             | 3449.341687                   | 0.273518237                    | 0.18436635                     |
| 880.3816856                                          | 0.998784441                             | 2884.94174                    | 0.318820972                    | 0.233943107                    |
| 1635.293294                                          | 1                                       | 5679.877168                   | 0.288455273                    | 0.200920232                    |
| 1720.434568                                          | 0.997530864                             | 5859.525999                   | 0.291978888                    | 0.208802467                    |
| 1107.668085                                          | 1                                       | 3800.831409                   | 0.243030013                    | 0.152189019                    |
| 2482.18162                                           | 0.999637243                             | 8766.670877                   | 0.24143256                     | 0.151826765                    |
| 742.69375                                            | 1                                       | 2460.895043                   | 0.3046679                      | 0.217708025                    |
| 1242.611401                                          | 0.998193497                             | 4049.854765                   | 0.207264049                    | 0.121300956                    |
| 1462.980545                                          | 1                                       | 5157.061051                   | 0.276752439                    | 0.190064984                    |
| 1490.77892                                           | 1                                       | 5108.434521                   | 0.217879372                    | 0.130624428                    |
| 713                                                  | 1                                       | 2226.509945                   | 0.244612398                    | 0.155822526                    |
| 1025.018827                                          | 1                                       | 3420.890311                   | 0.281656525                    | 0.19136963                     |
| 2530.952055                                          | 0.999657534                             | 9086.807762                   | 0.282078512                    | 0.193239239                    |
| 2988.912941                                          | 1                                       | 10871.60212                   | 0.289746123                    | 0.201388706                    |
| 2845.742515                                          | 1                                       | 10355.81751                   | 0.238755092                    | 0.149538924                    |
| 387.0472028                                          | 0.998688811                             | 976.7183061                   | 0.324255188                    | 0.236189647                    |
| 5252.830779                                          | 1                                       | 19263.67744                   | 0.230286693                    | 0.142226167                    |
| 1276.900231                                          | 0.99965358                              | 4181.804553                   | 0.208476159                    | 0.121218578                    |
| 886.3486542                                          | 0.998757764                             | 2855.841703                   | 0.261662394                    | 0.171261987                    |
| 1263.394191                                          | 1                                       | 4505.707699                   | 0.308072676                    | 0.217166708                    |
| 370.8771044                                          | 1                                       | 1055.748001                   | 0.311242874                    | 0.221201357                    |
| 2443.50047                                           | 1                                       | 8669.648032                   | 0.258089884                    | 0.168823148                    |
| 1259.911532                                          | 0.997689261                             | 4229.651398                   | 0.249425614                    | 0.159960897                    |
| 1145.902517                                          | 1                                       | 3875.586471                   | 0.252852827                    | 0.162975873                    |
| 919.8294664                                          | 1                                       | 2965.893331                   | 0.266741696                    | 0.179817548                    |
| 1256.180014                                          | 0.999307639                             | 4151.729152                   | 0.288497194                    | 0.203857149                    |
| 1248.617916                                          | 0.998628885                             | 4161.565147                   | 0.232770969                    | 0.142410232                    |
| 2243.020888                                          | 1                                       | 7830.02654                    | 0.243603173                    | 0.157315941                    |
| 924.9859626                                          | 0.995738636                             | 2963.103592                   | 0.279085049                    | 0.191260257                    |
| 1839.829226                                          | 0.992966194                             | 6245.695138                   | 0.226320411                    | 0.138030157                    |
| 561.1552632                                          | 1                                       | 1757.623419                   | 0.296852143                    | 0.210164567                    |
| 1064.016949                                          | 0.997175141                             | 3585.681038                   | 0.323674888                    | 0.239738892                    |
| 789.7510981                                          | 1                                       | 2564.852946                   | 0.257598976                    | 0.168880125                    |
| 1682.916865                                          | 0.997418586                             | 5808.334813                   | 0.22440277                     | 0.13650078                     |
| 767.8153693                                          | 1                                       | 2575.902754                   | 0.29038545                     | 0.201460764                    |
| 696.9563253                                          | 1                                       | 2247.646141                   | 0.291146273                    | 0.199903866                    |
| 556.4652778                                          | 1                                       | 1663.287553                   | 0.301678093                    | 0.213252057                    |
| 1718.757143                                          | 0.998109244                             | 5914.254245                   | 0.244389865                    | 0.157742661                    |
| 3331.287307                                          | 1                                       | 12127.1058                    | 0.274385803                    | 0.190991663                    |
| 1229.273038                                          | 0.998464164                             | 4091.268505                   | 0.206157868                    | 0.121003911                    |
| 763.2057762                                          | 0.998194946                             | 2321.001775                   | 0.263509706                    | 0.172979649                    |
| 1226.993781                                          | 1                                       | 4237.176554                   | 0.238513719                    | 0.146859058                    |
| 1340.078137                                          | 1                                       | 4751.707168                   | 0.259332912                    | 0.170244053                    |
| 1523.550495                                          | 1                                       | 5268.939212                   | 0.26806736                     | 0.180492159                    |
| 708.3014049                                          | 1                                       | 2366.240211                   | 0.295251168                    | 0.20382055                     |
| 1355.675695                                          | 1                                       | 4619.448348                   | 0.23059184                     | 0.141450097                    |
| 1446.875285                                          | 1                                       | 4989.962079                   | 0.202757036                    | 0.118600402                    |
| 1156.705947                                          | 1                                       | 3873.229749                   | 0.274246929                    | 0.188935243                    |
| 1124.526141                                          | 0.998755187                             | 3778.379629                   | 0.364974981                    | 0.285202456                    |
| 241.4124294                                          | 1                                       | 716.1167007                   | 0.369164695                    | 0.283726832                    |
| 895.5730416                                          | 0.998412138                             | 2832.788367                   | 0.244974057                    | 0.154130633                    |
| 687.1227364                                          | 1                                       | 2309.673613                   | 0.378535269                    | 0.29912736                     |
| 1114.580537                                          | 1                                       | 3718.32802                    | 0.277265762                    | 0.189296143                    |
| 821.215604                                           | 1                                       | 2504.036674                   | 0.31784648                     | 0.231810995                    |
| 785.6146927                                          | 1                                       | 2621.913079                   | 0.313310813                    | 0.224037572                    |
| 1755.645519                                          | 1                                       | 6032.945162                   | 0.287406333                    | 0.20218936                     |
| 1302.060264                                          | 0.997175141                             | 4295.914586                   | 0.329584553                    | 0.246484988                    |
| 1491.013305                                          | 0.99894958                              | 5221.190083                   | 0.232365112                    | 0.143082982                    |
| 1060.048951                                          | 0.995541958                             | 3448.890841                   | 0.249417199                    | 0.160247311                    |
| 1007.150685                                          | 1                                       | 3365.464884                   | 0.285994343                    | 0.196119586                    |
| 889.8353156                                          | 0.998970723                             | 2902.457782                   | 0.273849785                    | 0.182327515                    |
| 1336.392558                                          | 0.999606918                             | 4546.079563                   | 0.251100845                    | 0.164127531                    |
| 1180.708614                                          | 1                                       | 3969.091492                   | 0.261243618                    | 0.173812583                    |
| 1436.729282                                          | 1                                       | 4938.592801                   | 0.257229457                    | 0.170244987                    |
| 318.9131737                                          | 1                                       | 935.2740164                   | 0.345912841                    | 0.259169363                    |
| 1964.642929                                          | 0.999244206                             | 6757.01302                    | 0.269001717                    | 0.180652313                    |











| wavelet.LHL_firstorder_Uniformity | wavelet.LHL_firstorder_MeanAbsoluteDeviation | wavelet.LHL_firstorder_Energy | wavelet.LHL_firstorder_RobustMeanAbsoluteDeviation | wavelet.LHL_firstorder_Median |
|-----------------------------------|----------------------------------------------|-------------------------------|----------------------------------------------------|-------------------------------|
| 0.031427858                       | 184.8140197                                  | 127600185.5                   | 122.4536351                                        | 61.21079319                   |
| 0.056247534                       | 112.4597652                                  | 24372270.93                   | 67.0747823                                         | 40.96814495                   |
| 0.059005013                       | 102.1546023                                  | 30038127.01                   | 63.89820445                                        | 15.33578084                   |
| 0.052556811                       | 119.4718273                                  | 30608488.5                    | 70.98834573                                        | 39.2215972                    |
| 0.052439409                       | 114.3637294                                  | 59582939.22                   | 71.76601206                                        | 38.70007386                   |
| 0.042548209                       | 138.0097044                                  | 22216850.34                   | 91.70752513                                        | 37.74999525                   |
| 0.050845028                       | 118.5590286                                  | 152044279.7                   | 74.19687163                                        | 25.47161404                   |
| 0.071274795                       | 92.31412324                                  | 98948622.37                   | 51.77170704                                        | 25.35830728                   |
| 0.06667426                        | 97.01645631                                  | 90780639.62                   | 55.47328046                                        | 21.4817442                    |
| 0.055989293                       | 116.5045182                                  | 28712804.56                   | 69.9027572                                         | 40.35593731                   |
| 0.068031507                       | 89.33666862                                  | 22283356.4                    | 55.84622333                                        | 14.60315011                   |
| 0.047818521                       | 131.8012856                                  | 83036177.73                   | 78.7475551                                         | 39.80236564                   |
| 0.092575385                       | 86.46327781                                  | 40584563.04                   | 40.61697177                                        | 16.59212639                   |
| 0.057070529                       | 110.5522913                                  | 43259032.37                   | 66.09411651                                        | 28.98871365                   |
| 0.043749695                       | 152.1993081                                  | 99744990.39                   | 85.64614401                                        | 38.34768209                   |
| 0.051278538                       | 114.8459303                                  | 104682885.6                   | 74.15819815                                        | 20.20451876                   |
| 0.039808198                       | 150.257268                                   | 53864606.8                    | 97.60341587                                        | 61.8283234                    |
| 0.076779481                       | 87.39559424                                  | 22424549.39                   | 49.00936052                                        | 28.98683029                   |
| 0.07174247                        | 82.72926146                                  | 15690966.28                   | 53.90272061                                        | 22.48024361                   |
| 0.046514967                       | 135.0995248                                  | 195725396.7                   | 80.04334456                                        | 35.35698929                   |
| 0.0979035                         | 66.49091797                                  | 29967033.25                   | 37.63768145                                        | 18.56625438                   |
| 0.056004728                       | 108.0506278                                  | 23492444.78                   | 69.19602589                                        | 32.38156277                   |
| 0.037723541                       | 159.7218395                                  | 48752532.49                   | 101.7376825                                        | 59.49145811                   |
| 0.058380452                       | 100.9832489                                  | 50046245.77                   | 65.4076845                                         | 33.88112238                   |
| 0.051562792                       | 130.4306106                                  | 49551256.27                   | 71.72909482                                        | 29.76707901                   |
| 0.052383565                       | 115.442879                                   | 61537487.41                   | 72.30296109                                        | 40.99728245                   |
| 0.048084172                       | 147.9037144                                  | 126561452                     | 94.56418228                                        | 27.7223967                    |
| 0.059219174                       | 105.8602389                                  | 63900792.15                   | 62.60751882                                        | 26.2015726                    |
| 0.051273967                       | 122.6508673                                  | 12812321.15                   | 77.8657774                                         | 37.41935971                   |
| 0.05187304                        | 117.6610448                                  | 56320011.65                   | 72.98977873                                        | 38.2480268                    |
| 0.072674663                       | 93.32102744                                  | 93664755.83                   | 51.09252391                                        | 19.15104891                   |
| 0.050714581                       | 117.4498724                                  | 50098133.08                   | 76.45205788                                        | 15.78726103                   |
| 0.041785975                       | 140.2099369                                  | 112532600.6                   | 91.28017173                                        | 25.46028871                   |
| 0.043070349                       | 134.0007889                                  | 72452792.83                   | 89.9526433                                         | 44.22167953                   |
| 0.055974525                       | 106.5374166                                  | 92396997.63                   | 67.89190585                                        | 37.31735306                   |
| 0.075127521                       | 87.84128125                                  | 51232404.38                   | 49.25785388                                        | 19.86457233                   |
| 0.066795004                       | 101.9833489                                  | 91897912.65                   | 55.12120927                                        | 17.99330248                   |
| 0.05241024                        | 122.6283816                                  | 159135091.3                   | 72.41508475                                        | 22.73000961                   |
| 0.051014608                       | 116.8527787                                  | 30245208.65                   | 75.7137087                                         | 22.23412575                   |
| 0.043330565                       | 135.692698                                   | 241860120.2                   | 87.96107482                                        | 21.79843276                   |
| 0.066818095                       | 95.46137158                                  | 46635887.18                   | 56.46621929                                        | 20.60489935                   |
| 0.037976649                       | 155.7098698                                  | 163287272.2                   | 101.8729272                                        | 25.52664406                   |
| 0.056617794                       | 113.3460413                                  | 95769868.06                   | 66.37159105                                        | 28.96591326                   |
| 0.040291793                       | 148.0458111                                  | 96246124.56                   | 96.30615077                                        | 28.58907361                   |
| 0.050612141                       | 121.0127183                                  | 35415405.27                   | 77.58609291                                        | 41.98936804                   |
| 0.05599278                        | 107.145715                                   | 59404055.65                   | 67.63054296                                        | 29.30762947                   |
| 0.054694625                       | 111.551295                                   | 115854994.2                   | 69.0515863                                         | 35.20436667                   |
| 0.057981311                       | 124.332487                                   | 37392635.11                   | 63.31979658                                        | 46.70203394                   |
| 0.046250972                       | 133.5346288                                  | 31786589.23                   | 83.38421008                                        | 55.87621395                   |
| 0.079302852                       | 88.13665208                                  | 25209663.27                   | 46.41808555                                        | 19.59644112                   |
| 0.042636241                       | 147.6905627                                  | 113562017.9                   | 89.04777541                                        | 29.84475009                   |
| 0.034637402                       | 167.8586253                                  | 164215965                     | 111.6110993                                        | 29.86987024                   |
| 0.056090575                       | 110.036164                                   | 106546091.6                   | 66.91160724                                        | 18.34686851                   |
| 0.069365679                       | 87.61646792                                  | 17008833.62                   | 54.76460465                                        | 33.30252243                   |
| 0.073398157                       | 87.02802994                                  | 20367637.04                   | 50.85048903                                        | 16.24027531                   |
| 0.049826167                       | 131.9084336                                  | 75048781.16                   | 75.18295195                                        | 25.8775775                    |
| 0.046408375                       | 127.7833514                                  | 121234122.7                   | 82.38460834                                        | 38.59965624                   |
| 0.05046888                        | 119.3659772                                  | 90345752.71                   | 76.13741387                                        | 37.71872222                   |
| 0.05437011                        | 114.6701371                                  | 43342056.76                   | 68.32712669                                        | 27.37321479                   |
| 0.059150797                       | 108.6549731                                  | 219616781.4                   | 64.80670976                                        | 14.42337304                   |
| 0.043147332                       | 134.9732671                                  | 55667764.72                   | 90.82712331                                        | 38.61602369                   |
| 0.049868283                       | 132.227654                                   | 104124947.8                   | 74.6752108                                         | 39.41257016                   |
| 0.05481041                        | 112.3123526                                  | 142969734                     | 68.75476984                                        | 31.61562846                   |
| 0.040326205                       | 146.3840869                                  | 288900101                     | 94.70181506                                        | 22.73987399                   |
| 0.071209742                       | 89.39136818                                  | 12576617.86                   | 53.29556772                                        | 25.8897993                    |
| 0.073494654                       | 90.10429999                                  | 69551919.63                   | 50.73254454                                        | 18.63369801                   |
| 0.055615802                       | 111.3551307                                  | 30697477.26                   | 69.11677211                                        | 9.978390955                   |
| 0.03781079                        | 153.3469294                                  | 253829558.9                   | 101.7050391                                        | 24.8691534                    |
| 0.060080108                       | 100.2776929                                  | 113995693.4                   | 62.17900219                                        | 24.69272084                   |
| 0.061369755                       | 98.7060639                                   | 56233860.32                   | 61.27679847                                        | 38.22427082                   |
| 0.068025917                       | 94.98421428                                  | 25294661.83                   | 54.78556796                                        | 16.33325709                   |
| 0.036550443                       | 170.4898009                                  | 252873444.8                   | 106.4646914                                        | 69.7755011                    |
| 0.049471865                       | 139.7053877                                  | 94553421.31                   | 78.79568762                                        | 22.88204317                   |
| 0.038157929                       | 155.9112033                                  | 93954889.89                   | 102.4150295                                        | 35.07995341                   |
| 0.052244067                       | 113.7288998                                  | 72449948.58                   | 72.28566601                                        | 2.840360316                   |
| 0.045040323                       | 132.5388264                                  | 42309053.75                   | 85.86566614                                        | 41.57773803                   |
| 0.049991499                       | 124.6481772                                  | 71972112.7                    | 77.21740884                                        | 42.93132691                   |
| 0.057005941                       | 113.3051225                                  | 26290576.69                   | 66.60235095                                        | 35.09702696                   |
| 0.064681801                       | 94.56012848                                  | 28857031.45                   | 59.65009588                                        | 34.26618703                   |
| 0.042837943                       | 138.4528308                                  | 78693969.96                   | 90.58311962                                        | 27.06496769                   |
| 0.031405258                       | 185.9712361                                  | 120321781.2                   | 122.6416544                                        | 56.88606419                   |
| 0.057618633                       | 115.4545214                                  | 51198635.86                   | 64.62128794                                        | 8.681832408                   |
| 0.095325715                       | 72.42775185                                  | 40213582.72                   | 38.67393284                                        | 7.921710725                   |
| 0.087696299                       | 66.44696569                                  | 24434973.46                   | 43.20971032                                        | 20.22381594                   |
| 0.045206188                       | 127.053477                                   | 65657594.25                   | 85.80530974                                        | 20.21270263                   |
| 0.100565653                       | 66.03570763                                  | 14895214.01                   | 36.95215927                                        | 16.2594322                    |
| 0.059891267                       | 105.4556001                                  | 53845391.28                   | 61.94898004                                        | 7.0994302                     |
| 0.070143448                       | 94.58089808                                  | 53999200.73                   | 52.72561347                                        | 20.1761662                    |
| 0.068897623                       | 88.45326262                                  | 22811727.95                   | 54.56736585                                        | 29.00979246                   |
| 0.057320287                       | 115.3422021                                  | 61482687.39                   | 65.10831359                                        | 38.40671344                   |
| 0.076585965                       | 96.27404852                                  | 31472167.12                   | 48.67277348                                        | 27.67980944                   |
| 0.042973082                       | 135.1265223                                  | 74273730.51                   | 91.13386971                                        | 24.62597614                   |
| 0.048767641                       | 123.9059958                                  | 152334722.5                   | 76.96967045                                        | 35.26442549                   |
| 0.059983655                       | 101.2097725                                  | 64437771.02                   | 63.03985035                                        | 27.48193169                   |
| 0.052745568                       | 110.4999758                                  | 93324252                      | 72.17647479                                        | 24.70394983                   |
| 0.04779163                        | 128.8192124                                  | 109905365.8                   | 79.63444411                                        | 31.97281857                   |
| 0.048652452                       | 125.9415031                                  | 86720786.65                   | 77.19723307                                        | 37.67488293                   |
| 0.054271585                       | 125.4342624                                  | 34377375.85                   | 71.36781038                                        | 15.39964087                   |
| 0.085189402                       | 73.24755345                                  | 8883676.804                   | 44.72602853                                        | 18.29914732                   |
| 0.048258506                       | 126.929022                                   | 184320164                     | 77.31079385                                        | 30.58712425                   |





| wavelet.LHL_glrIm_ShortRunLowGrayLevelEmphasis | wavelet.LHL_glrIm_GrayLevelVariance | wavelet.LHL_glrIm_LowGrayLevelRunEmphasis | wavelet.LHL_glrIm_GrayLevelNonUniformityNormalized | wavelet.LHL_glrIm_RunVariance |
|------------------------------------------------|-------------------------------------|-------------------------------------------|----------------------------------------------------|-------------------------------|
| 0.001439776                                    | 93.54014401                         | 0.001459705                               | 0.031145559                                        | 0.03601029                    |
| 0.001925847                                    | 41.56602885                         | 0.001954256                               | 0.055033091                                        | 0.059568469                   |
| 0.003318642                                    | 32.23521323                         | 0.003414082                               | 0.057131211                                        | 0.072653714                   |
| 0.001508863                                    | 49.5944038                          | 0.001524532                               | 0.051285243                                        | 0.059683889                   |
| 0.002460819                                    | 39.32016833                         | 0.002525816                               | 0.051241515                                        | 0.059292785                   |
| 0.005696468                                    | 52.73525782                         | 0.005741846                               | 0.041927093                                        | 0.035616289                   |
| 0.00103509                                     | 43.02481994                         | 0.001063268                               | 0.049456377                                        | 0.061587189                   |
| 0.000902919                                    | 31.87367981                         | 0.000935917                               | 0.067765686                                        | 0.082960874                   |
| 0.001308659                                    | 32.8762689                          | 0.0013542                                 | 0.063986135                                        | 0.076882771                   |
| 0.002058827                                    | 43.46417495                         | 0.002090969                               | 0.054517606                                        | 0.048881346                   |
| 0.003169007                                    | 24.34749118                         | 0.003265651                               | 0.066324832                                        | 0.06392591                    |
| 0.001633077                                    | 57.40314682                         | 0.001685022                               | 0.046403846                                        | 0.052876105                   |
| 0.001528949                                    | 37.71566624                         | 0.001581046                               | 0.083745395                                        | 0.130256362                   |
| 0.001735705                                    | 39.85943265                         | 0.001778263                               | 0.055085784                                        | 0.066780037                   |
| 0.001195306                                    | 81.67730961                         | 0.001211825                               | 0.042436799                                        | 0.049410044                   |
| 0.000800506                                    | 39.01032762                         | 0.000822349                               | 0.050015295                                        | 0.061194899                   |
| 0.002444427                                    | 66.10847296                         | 0.002512724                               | 0.039241634                                        | 0.041999536                   |
| 0.002722497                                    | 29.99994383                         | 0.002780692                               | 0.07339835                                         | 0.087222878                   |
| 0.006514073                                    | 19.89640092                         | 0.006682788                               | 0.070219941                                        | 0.072265733                   |
| 0.000623967                                    | 60.79772839                         | 0.000637069                               | 0.045406022                                        | 0.050343465                   |
| 0.002535579                                    | 16.63684                            | 0.002668883                               | 0.091287286                                        | 0.138809751                   |
| 0.003187806                                    | 35.28449707                         | 0.003233768                               | 0.054910428                                        | 0.052041277                   |
| 0.005131432                                    | 72.82874721                         | 0.005219577                               | 0.037283219                                        | 0.040627241                   |
| 0.002988875                                    | 29.613435                           | 0.003051275                               | 0.057147485                                        | 0.057469999                   |
| 0.001624563                                    | 63.75071827                         | 0.001646271                               | 0.050025112                                        | 0.051644616                   |
| 0.00209632                                     | 40.47980016                         | 0.002163697                               | 0.051165827                                        | 0.057825934                   |
| 0.001136845                                    | 64.10361196                         | 0.001158938                               | 0.039966876                                        | 0.04808822                    |
| 0.001089941                                    | 37.96673802                         | 0.001118345                               | 0.057416029                                        | 0.066125143                   |
| 0.002996393                                    | 44.7203824                          | 0.003016242                               | 0.050673165                                        | 0.040971623                   |
| 0.001864413                                    | 43.81948432                         | 0.001892519                               | 0.050616892                                        | 0.058616945                   |
| 0.002241465                                    | 33.07792543                         | 0.002320413                               | 0.068577999                                        | 0.100772166                   |
| 0.001522926                                    | 39.79921016                         | 0.001557565                               | 0.049784271                                        | 0.058531343                   |
| 0.000944775                                    | 56.38588263                         | 0.000964082                               | 0.041095987                                        | 0.050339875                   |
| 0.002149665                                    | 48.79293581                         | 0.002190778                               | 0.042555645                                        | 0.045131533                   |
| 0.001370513                                    | 33.28119307                         | 0.001409245                               | 0.054699436                                        | 0.057532306                   |
| 0.001765787                                    | 28.53579658                         | 0.001831341                               | 0.071807906                                        | 0.085035623                   |
| 0.001024579                                    | 41.28809132                         | 0.001054069                               | 0.064208825                                        | 0.07424188                    |
| 0.000915582                                    | 50.74908349                         | 0.000947119                               | 0.049757949                                        | 0.089658127                   |
| 0.002055474                                    | 40.07018247                         | 0.002085514                               | 0.050227612                                        | 0.046297537                   |
| 0.000604076                                    | 54.08881842                         | 0.000618322                               | 0.042561244                                        | 0.049729015                   |
| 0.00218927                                     | 30.00269311                         | 0.0022595                                 | 0.064018384                                        | 0.080632948                   |
| 0.001542912                                    | 68.38262294                         | 0.00156435                                | 0.03751969                                         | 0.035170762                   |
| 0.001131239                                    | 43.22392277                         | 0.001161014                               | 0.054871815                                        | 0.064500947                   |
| 0.001285243                                    | 63.00284539                         | 0.001305354                               | 0.039758936                                        | 0.03938011                    |
| 0.005297445                                    | 43.53382318                         | 0.005407346                               | 0.049799504                                        | 0.045204271                   |
| 0.001537358                                    | 34.70414341                         | 0.001579257                               | 0.054690857                                        | 0.061185794                   |
| 0.000644435                                    | 40.15433775                         | 0.00066185                                | 0.053016526                                        | 0.068295936                   |
| 0.001614966                                    | 69.05505536                         | 0.001629448                               | 0.056289599                                        | 0.064543275                   |
| 0.001607898                                    | 58.45057516                         | 0.001619119                               | 0.045397972                                        | 0.046106432                   |
| 0.00644234                                     | 29.91190377                         | 0.006635403                               | 0.075595741                                        | 0.081622824                   |
| 0.000604754                                    | 72.4047566                          | 0.000610853                               | 0.041759552                                        | 0.047463811                   |
| 0.001488722                                    | 77.58918627                         | 0.00151346                                | 0.034322651                                        | 0.035566254                   |
| 0.002172917                                    | 38.73506968                         | 0.002222663                               | 0.05478045                                         | 0.054900515                   |
| 0.0017785                                      | 24.36360562                         | 0.001815626                               | 0.067488783                                        | 0.070142488                   |
| 0.006298043                                    | 24.58831862                         | 0.006452292                               | 0.070877612                                        | 0.071702211                   |
| 0.001140236                                    | 63.45997688                         | 0.001155492                               | 0.048499782                                        | 0.053414208                   |
| 0.001243914                                    | 47.59235262                         | 0.001272962                               | 0.045625086                                        | 0.04956697                    |
| 0.001461136                                    | 41.92622906                         | 0.001494432                               | 0.049483183                                        | 0.052735841                   |
| 0.002208226                                    | 42.6385759                          | 0.002254708                               | 0.052769865                                        | 0.056849359                   |
| 0.001279433                                    | 39.1868344                          | 0.001327914                               | 0.056518883                                        | 0.078159772                   |
| 0.00162052                                     | 50.15465917                         | 0.00164542                                | 0.042702648                                        | 0.039730003                   |
| 0.000983054                                    | 63.26953274                         | 0.000998818                               | 0.048373542                                        | 0.051824921                   |
| 0.001933427                                    | 39.7851116                          | 0.001980963                               | 0.053164927                                        | 0.061002078                   |
| 0.000857102                                    | 61.61118744                         | 0.000874429                               | 0.039789425                                        | 0.04243098                    |
| 0.003880153                                    | 26.18624726                         | 0.003973471                               | 0.069050544                                        | 0.068856404                   |
| 0.001371699                                    | 30.10431737                         | 0.00147289                                | 0.069503782                                        | 0.096093626                   |
| 0.003172311                                    | 38.80575985                         | 0.003232331                               | 0.054033587                                        | 0.060445213                   |
| 0.001005174                                    | 65.60117064                         | 0.001024474                               | 0.037362643                                        | 0.041766231                   |
| 0.002241687                                    | 31.47387473                         | 0.002295318                               | 0.058603079                                        | 0.061045663                   |
| 0.002320839                                    | 30.3532648                          | 0.002390201                               | 0.060058575                                        | 0.064987057                   |
| 0.004245556                                    | 31.62517748                         | 0.004348718                               | 0.0705851182                                       | 0.070955059                   |
| 0.001152732                                    | 87.91046319                         | 0.001176771                               | 0.035714383                                        | 0.05237665                    |
| 0.000787327                                    | 69.08278157                         | 0.00080707                                | 0.046786321                                        | 0.07188409                    |
| 0.001632357                                    | 67.10647495                         | 0.001655161                               | 0.037711319                                        | 0.035204689                   |
| 0.002111483                                    | 38.22646294                         | 0.002170897                               | 0.050942139                                        | 0.057463313                   |
| 0.002005393                                    | 50.39279672                         | 0.002030984                               | 0.044465287                                        | 0.043801158                   |
| 0.001445532                                    | 48.46140074                         | 0.001471815                               | 0.048959076                                        | 0.052085982                   |
| 0.002024445                                    | 44.09641718                         | 0.002050834                               | 0.055367397                                        | 0.056868822                   |
| 0.002963144                                    | 27.12761381                         | 0.003026764                               | 0.063210628                                        | 0.06018892                    |
| 0.00137929                                     | 54.86360582                         | 0.001402839                               | 0.042164138                                        | 0.041121386                   |
| 0.002622535                                    | 95.4400427                          | 0.002672643                               | 0.031112076                                        | 0.035464847                   |
| 0.001863857                                    | 47.44253809                         | 0.001901438                               | 0.055575421                                        | 0.064852133                   |
| 0.001284822                                    | 21.09204268                         | 0.001348131                               | 0.088605231                                        | 0.114609493                   |
| 0.005676523                                    | 12.89821124                         | 0.005967209                               | 0.085006272                                        | 0.102457054                   |
| 0.001938565                                    | 43.84265897                         | 0.001978139                               | 0.044640158                                        | 0.044076137                   |
| 0.002291551                                    | 16.44635617                         | 0.00239901                                | 0.093317738                                        | 0.132653131                   |
| 0.001556382                                    | 37.47546548                         | 0.00159709                                | 0.057841454                                        | 0.067350708                   |
| 0.002089684                                    | 32.32474783                         | 0.002163358                               | 0.066655018                                        | 0.085893862                   |
| 0.002230421                                    | 24.74806958                         | 0.002293489                               | 0.066581835                                        | 0.074309631                   |
| 0.001298943                                    | 48.34984358                         | 0.001326801                               | 0.054956228                                        | 0.071110265                   |
| 0.002621761                                    | 39.52905949                         | 0.002671382                               | 0.071914096                                        | 0.094517842                   |
| 0.001217241                                    | 50.14106153                         | 0.001237346                               | 0.042561702                                        | 0.041260459                   |
| 0.001830561                                    | 47.16234544                         | 0.001868045                               | 0.047815991                                        | 0.050059823                   |
| 0.001472005                                    | 31.74300183                         | 0.001516103                               | 0.058529316                                        | 0.062734555                   |
| 0.001651286                                    | 34.80691118                         | 0.001698906                               | 0.051864117                                        | 0.05750366                    |
| 0.001221387                                    | 50.86166845                         | 0.001249363                               | 0.046324639                                        | 0.053835255                   |
| 0.001586994                                    | 49.55115403                         | 0.001622613                               | 0.047372441                                        | 0.060411815                   |
| 0.001990122                                    | 54.3375866                          | 0.002020345                               | 0.052447441                                        | 0.064865602                   |
| 0.006441796                                    | 17.68032115                         | 0.006674817                               | 0.080425678                                        | 0.101339326                   |
| 0.000780855                                    | 51.86187526                         | 0.000802949                               | 0.047026239                                        | 0.059927596                   |

| wavelet.LHL_glrjm_GrayLevelNonUniformity | wavelet.LHL_glrjm_LongRunEmphasis | wavelet.LHL_glrjm_ShortRunHighGrayLevelEmphasis | wavelet.LHL_glrjm_RunLengthNonUniformity | wavelet.LHL_glrjm_ShortRunEmphasis |
|------------------------------------------|-----------------------------------|-------------------------------------------------|------------------------------------------|------------------------------------|
| 63.94636                                 | 1.104435442                       | 1609.065814                                     | 1926.617657                              | 0.975837867                        |
| 48.76090103                              | 1.174072437                       | 1395.923018                                     | 799.0772949                              | 0.960530559                        |
| 82.17967053                              | 1.211481524                       | 540.5066098                                     | 1271.087128                              | 0.952626484                        |
| 47.5188254                               | 1.173338485                       | 2439.757261                                     | 837.1357329                              | 0.961048175                        |
| 115.0341222                              | 1.172909432                       | 684.7295777                                     | 2026.004842                              | 0.960788949                        |
| 26.76146948                              | 1.105470343                       | 659.9288335                                     | 597.8458632                              | 0.975125877                        |
| 265.0370081                              | 1.174109469                       | 1408.574246                                     | 4847.473577                              | 0.961734018                        |
| 322.8147911                              | 1.234222224                       | 1505.574143                                     | 4179.196275                              | 0.949808297                        |
| 272.2121804                              | 1.220235267                       | 1082.775896                                     | 3750.579081                              | 0.951717511                        |
| 55.86132784                              | 1.144587696                       | 1116.23704                                      | 938.1902962                              | 0.966369075                        |
| 94.25391895                              | 1.190707649                       | 520.6012494                                     | 1265.312275                              | 0.955777941                        |
| 101.9404                                 | 1.154813338                       | 1675.452094                                     | 2002.268772                              | 0.964582147                        |
| 141.1394854                              | 1.363090803                       | 1455.085343                                     | 1395.076477                              | 0.926842441                        |
| 89.15876416                              | 1.193518302                       | 1071.589771                                     | 1444.057337                              | 0.956444999                        |
| 80.56349993                              | 1.143181345                       | 2189.749069                                     | 1744.428909                              | 0.967528159                        |
| 207.238483                               | 1.177364071                       | 1834.228015                                     | 3731.644227                              | 0.960079982                        |
| 45.07485862                              | 1.123104182                       | 1716.721514                                     | 1065.404678                              | 0.971378098                        |
| 84.00809159                              | 1.250777155                       | 903.3918096                                     | 994.9864211                              | 0.945825579                        |
| 85.55301415                              | 1.208348119                       | 327.1095214                                     | 1079.77555                               | 0.953758651                        |
| 225.6131048                              | 1.145991106                       | 2534.570823                                     | 4554.700109                              | 0.96675154                         |
| 247.6735186                              | 1.383969619                       | 559.4795313                                     | 2221.302095                              | 0.922938254                        |
| 56.52214805                              | 1.151673083                       | 756.5424061                                     | 940.4081251                              | 0.965417193                        |
| 36.73805585                              | 1.120979159                       | 707.130041                                      | 913.8749421                              | 0.971374199                        |
| 143.8173214                              | 1.164733504                       | 616.2812706                                     | 2284.583187                              | 0.963909778                        |
| 60.67884144                              | 1.153888095                       | 1713.40842                                      | 1103.342389                              | 0.96391439                         |
| 115.1475037                              | 1.166696519                       | 964.1133164                                     | 2040.516818                              | 0.962606245                        |
| 123.6691131                              | 1.140382903                       | 1519.27175                                      | 2843.491394                              | 0.967782496                        |
| 149.5619623                              | 1.191538795                       | 1519.46037                                      | 2328.945211                              | 0.957168351                        |
| 21.76249241                              | 1.124830073                       | 1583.273947                                     | 396.6108071                              | 0.969804365                        |
| 98.75872868                              | 1.167720586                       | 1336.095446                                     | 1767.560516                              | 0.962353969                        |
| 301.0302549                              | 1.27846496                        | 777.1716543                                     | 3782.103309                              | 0.942570238                        |
| 97.73320338                              | 1.16999508                        | 1122.572878                                     | 1774.456197                              | 0.961489926                        |
| 126.8440862                              | 1.145581532                       | 1790.218015                                     | 2831.21551                               | 0.967023228                        |
| 95.9329041                               | 1.132356918                       | 847.8010055                                     | 2079.59334                               | 0.969322664                        |
| 228.7785945                              | 1.167636628                       | 990.3792284                                     | 3787.266079                              | 0.962007184                        |
| 200.043624                               | 1.245957234                       | 826.9373662                                     | 2420.683242                              | 0.946056213                        |
| 224.1088696                              | 1.212516643                       | 1555.789842                                     | 3092.659063                              | 0.953530438                        |
| 239.3545107                              | 1.242898128                       | 1610.49011                                      | 4224.155884                              | 0.950104698                        |
| 59.22387951                              | 1.134801334                       | 1086.523209                                     | 1086.263178                              | 0.968897901                        |
| 295.6220437                              | 1.145796198                       | 2392.535252                                     | 6357.121105                              | 0.966331841                        |
| 155.0793051                              | 1.22918491                        | 715.7561101                                     | 2128.767327                              | 0.950406618                        |
| 140.3183473                              | 1.104732032                       | 1200.517088                                     | 3502.581791                              | 0.975076109                        |
| 189.3561184                              | 1.186826433                       | 1427.219817                                     | 3094.965167                              | 0.958192758                        |
| 95.31569343                              | 1.117041744                       | 1466.325729                                     | 2229.555054                              | 0.97238922                         |
| 60.96591397                              | 1.135727438                       | 690.5002596                                     | 1124.922191                              | 0.967835756                        |
| 142.1434145                              | 1.177322912                       | 986.1534575                                     | 2340.053695                              | 0.96002036                         |
| 227.9906497                              | 1.194644671                       | 2426.359008                                     | 3844.815525                              | 0.957191945                        |
| 46.28673875                              | 1.189158815                       | 2871.539256                                     | 736.2610873                              | 0.957305792                        |
| 37.01095861                              | 1.136919153                       | 2790.951532                                     | 750.1536752                              | 0.968059668                        |
| 95.21177529                              | 1.236707158                       | 329.3416049                                     | 1100.240177                              | 0.947862914                        |
| 102.7775751                              | 1.137618078                       | 5093.62866                                      | 2266.451746                              | 0.968600707                        |
| 111.8481835                              | 1.105936898                       | 1246.066108                                     | 3049.133159                              | 0.974781742                        |
| 235.2384114                              | 1.159829819                       | 845.9692197                                     | 3904.488889                              | 0.963634746                        |
| 69.89266652                              | 1.207442431                       | 1201.453484                                     | 915.3525567                              | 0.952857569                        |
| 88.46143763                              | 1.208565639                       | 346.7534423                                     | 1105.179968                              | 0.953496933                        |
| 90.04220291                              | 1.157227358                       | 2377.251013                                     | 1687.829019                              | 0.963756946                        |
| 176.3329599                              | 1.145422259                       | 1212.853382                                     | 3537.412296                              | 0.96636615                         |
| 163.0109083                              | 1.155293022                       | 1116.195118                                     | 2997.92175                               | 0.964096372                        |
| 82.596782                                | 1.16645588                        | 879.2784877                                     | 1416.684279                              | 0.961911092                        |
| 483.6362072                              | 1.217380233                       | 1217.058672                                     | 7582.427119                              | 0.953733667                        |
| 72.61738923                              | 1.118699893                       | 1213.438633                                     | 1579.083816                              | 0.97182165                         |
| 123.3178427                              | 1.149633658                       | 2164.69646                                      | 2333.073703                              | 0.966138968                        |
| 291.43474                                | 1.176861469                       | 876.5610727                                     | 4937.862896                              | 0.960159485                        |
| 291.5813387                              | 1.124880648                       | 1761.926913                                     | 6786.495368                              | 0.970840483                        |
| 51.38475042                              | 1.199244178                       | 535.3569238                                     | 664.9602345                              | 0.956220422                        |
| 247.9628615                              | 1.26956294                        | 1002.770604                                     | 3076.35418                               | 0.943145619                        |
| 66.79616418                              | 1.174389497                       | 764.9854189                                     | 1116.474765                              | 0.961000959                        |
| 224.5350786                              | 1.123793649                       | 1631.949588                                     | 5566.347422                              | 0.970891469                        |
| 325.331488                               | 1.174876386                       | 748.126061                                      | 5014.066999                              | 0.961111824                        |
| 164.1316374                              | 1.190599434                       | 666.6261597                                     | 2441.262377                              | 0.956826929                        |
| 80.286822                                | 1.207820432                       | 509.4919615                                     | 1079.442868                              | 0.953347624                        |
| 146.1064164                              | 1.152724782                       | 1659.226652                                     | 3732.167757                              | 0.965053661                        |
| 100.3906339                              | 1.201031853                       | 3190.094041                                     | 1916.461748                              | 0.956743656                        |
| 82.40629529                              | 1.104313287                       | 1203.346829                                     | 2047.444691                              | 0.975288311                        |
| 151.4672493                              | 1.16691461                        | 717.3403199                                     | 2690.702537                              | 0.961994597                        |
| 57.35757219                              | 1.126835308                       | 1205.688663                                     | 1195.520181                              | 0.9709907                          |
| 111.8888188                              | 1.152345367                       | 1324.509205                                     | 2085.708556                              | 0.965054426                        |
| 50.36922693                              | 1.167321263                       | 1472.779955                                     | 823.160552                               | 0.961732158                        |
| 101.7544869                              | 1.192011749                       | 689.7435927                                     | 1437.846801                              | 0.956752133                        |
| 94.83128983                              | 1.122895894                       | 1316.327641                                     | 2081.861075                              | 0.97076598                         |
| 59.89317832                              | 1.103201582                       | 1438.094985                                     | 1807.156615                              | 0.976008308                        |
| 94.52316369                              | 1.184995657                       | 1114.646658                                     | 1528.783108                              | 0.95912303                         |
| 263.9647199                              | 1.32092343                        | 1027.307258                                     | 2505.180348                              | 0.93343199                         |
| 239.6202008                              | 1.292344146                       | 228.3482064                                     | 2395.622547                              | 0.937611161                        |
| 104.4519383                              | 1.130944852                       | 862.1421336                                     | 2157.321635                              | 0.969196452                        |
| 129.1645806                              | 1.363054606                       | 646.0650563                                     | 1150.830054                              | 0.928168134                        |
| 130.0978287                              | 1.192866795                       | 1063.209867                                     | 2012.31154                               | 0.957450706                        |
| 170.0461256                              | 1.242373492                       | 749.0125543                                     | 2228.897478                              | 0.948195656                        |
| 91.43061961                              | 1.212314255                       | 748.1649397                                     | 1215.480744                              | 0.95334683                         |
| 104.5791625                              | 1.205241794                       | 1658.392996                                     | 1690.027928                              | 0.95447024                         |
| 86.58160865                              | 1.269967305                       | 1176.198183                                     | 1035.505948                              | 0.942088269                        |
| 97.55450939                              | 1.121582536                       | 1470.662089                                     | 2126.488165                              | 0.971540476                        |
| 236.6143582                              | 1.14753882                        | 1005.967432                                     | 4522.178941                              | 0.965780847                        |
| 182.5168146                              | 1.18322293                        | 966.8315522                                     | 2795.434938                              | 0.958371064                        |
| 214.2443033                              | 1.167846213                       | 852.2393375                                     | 3735.383981                              | 0.961727245                        |
| 151.1481176                              | 1.154491733                       | 1291.833647                                     | 2978.869456                              | 0.965276085                        |
| 126.6252386                              | 1.173017476                       | 1135.886183                                     | 2419.916301                              | 0.961682244                        |
| 52.01792146                              | 1.181994198                       | 1389.603854                                     | 895.4921044                              | 0.96070056                         |
| 61.68696231                              | 1.286805931                       | 291.7977871                                     | 655.4731416                              | 0.939499967                        |
| 257.1923939                              | 1.175315949                       | 1867.03738                                      | 4926.145919                              | 0.960119858                        |



| wavelet.LHL_glrIm_LongRunHighGrayLevelEmphasis | wavelet.LHL_glrIm_RunPercentage | wavelet.LHL_glrIm_LongRunLowGrayLevelEmphasis | wavelet.LHL_glrIm_RunEntropy | wavelet.LHL_glrIm_HighGrayLevelRunEmphasis |
|------------------------------------------------|---------------------------------|-----------------------------------------------|------------------------------|--------------------------------------------|
| 1830.345959                                    | 0.967556007                     | 0.001544201                                   | 5.468124149                  | 1650.585983                                |
| 1712.171721                                    | 0.947593583                     | 0.002078663                                   | 4.842608361                  | 1454.204299                                |
| 686.2202864                                    | 0.937619095                     | 0.003836464                                   | 4.808418965                  | 567.1928074                                |
| 2981.784102                                    | 0.94827179                      | 0.001594498                                   | 4.927776664                  | 2539.649823                                |
| 834.0657823                                    | 0.947992464                     | 0.002810219                                   | 4.919738668                  | 712.3472895                                |
| 746.9395885                                    | 0.967016317                     | 0.005933411                                   | 5.017928821                  | 676.5770739                                |
| 1712.34485                                     | 0.948300505                     | 0.001191351                                   | 4.989790089                  | 1463.40657                                 |
| 1953.240183                                    | 0.932504066                     | 0.001089461                                   | 4.713400521                  | 1584.650423                                |
| 1387.813884                                    | 0.935716945                     | 0.001560862                                   | 4.76666522                   | 1137.688933                                |
| 1326.504902                                    | 0.955726177                     | 0.002227843                                   | 4.847609761                  | 1155.827161                                |
| 648.6294411                                    | 0.942358702                     | 0.003677685                                   | 4.574776835                  | 544.6664579                                |
| 1999.308844                                    | 0.952978475                     | 0.001900895                                   | 5.085190227                  | 1735.891843                                |
| 2127.356681                                    | 0.902064192                     | 0.001835787                                   | 4.670395968                  | 1568.045479                                |
| 1330.780314                                    | 0.942565297                     | 0.001967108                                   | 4.897241695                  | 1119.349271                                |
| 2583.621751                                    | 0.956730769                     | 0.001283908                                   | 5.267663296                  | 2262.520434                                |
| 2246.384526                                    | 0.946825341                     | 0.000919376                                   | 4.935832328                  | 1910.078917                                |
| 1975.428581                                    | 0.961989434                     | 0.002791156                                   | 5.178660202                  | 1765.553272                                |
| 1196.046083                                    | 0.928130264                     | 0.003049967                                   | 4.571463056                  | 955.4320226                                |
| 416.1437923                                    | 0.938663032                     | 0.007431492                                   | 4.455664609                  | 343.2981703                                |
| 3005.79244                                     | 0.95570154                      | 0.000694565                                   | 5.137360925                  | 2622.012695                                |
| 834.7795638                                    | 0.897028897                     | 0.003333165                                   | 4.409992765                  | 605.67515                                  |
| 906.5354456                                    | 0.954017252                     | 0.003434609                                   | 4.758324241                  | 784.3818515                                |
| 818.6742494                                    | 0.962289663                     | 0.005590405                                   | 5.262195333                  | 728.4403927                                |
| 745.8971414                                    | 0.950655314                     | 0.00332937                                    | 4.716190149                  | 640.0701518                                |
| 2045.893727                                    | 0.952806816                     | 0.001738808                                   | 5.038921844                  | 1776.68967                                 |
| 1165.66502                                     | 0.949930188                     | 0.002451309                                   | 4.917373536                  | 1001.042209                                |
| 1794.762432                                    | 0.957053463                     | 0.001254708                                   | 5.22422779                   | 1570.704853                                |
| 1887.796337                                    | 0.943045731                     | 0.001245079                                   | 4.843164561                  | 1586.822317                                |
| 1834.915332                                    | 0.960764068                     | 0.003098157                                   | 4.815712125                  | 1632.271386                                |
| 1627.65207                                     | 0.949853944                     | 0.002017462                                   | 4.943666911                  | 1389.568866                                |
| 1049.893569                                    | 0.922349403                     | 0.002707203                                   | 4.765866978                  | 823.9670938                                |
| 1373.375844                                    | 0.948804699                     | 0.001709722                                   | 4.921567905                  | 1168.821698                                |
| 2117.325559                                    | 0.955832956                     | 0.001049173                                   | 5.162762862                  | 1850.647255                                |
| 993.1304667                                    | 0.959247136                     | 0.002366638                                   | 5.049860955                  | 875.1113671                                |
| 1206.13739                                     | 0.949626214                     | 0.001579283                                   | 4.805649556                  | 1030.157066                                |
| 1087.108182                                    | 0.928796778                     | 0.002129025                                   | 4.640822489                  | 873.7554252                                |
| 1976.519015                                    | 0.937899241                     | 0.001188644                                   | 4.799422131                  | 1631.310979                                |
| 2094.553361                                    | 0.931811068                     | 0.001100756                                   | 5.114630177                  | 1693.418523                                |
| 1274.50279                                     | 0.958599124                     | 0.002215013                                   | 4.849481241                  | 1121.747406                                |
| 2835.192383                                    | 0.955380383                     | 0.000679974                                   | 5.133785567                  | 2475.636929                                |
| 927.5796913                                    | 0.933722792                     | 0.00258157                                    | 4.733389555                  | 753.4297444                                |
| 1358.959658                                    | 0.967138111                     | 0.001665072                                   | 5.244062911                  | 1231.013589                                |
| 1773.864088                                    | 0.944555581                     | 0.001293281                                   | 4.918174094                  | 1490.614181                                |
| 1689.063846                                    | 0.96351719                      | 0.001390682                                   | 5.172771153                  | 1508.969077                                |
| 810.8012907                                    | 0.957866859                     | 0.006145457                                   | 4.892427393                  | 713.5973025                                |
| 1209.101607                                    | 0.946784363                     | 0.001764248                                   | 4.835568755                  | 1027.149505                                |
| 3023.529287                                    | 0.942602772                     | 0.000741117                                   | 4.921071521                  | 2534.263042                                |
| 3567.602213                                    | 0.943919456                     | 0.001693609                                   | 4.949143641                  | 2999.768746                                |
| 3289.60746                                     | 0.957968001                     | 0.001667093                                   | 5.004164466                  | 2885.177962                                |
| 417.5460049                                    | 0.931440601                     | 0.00750894                                    | 4.566162793                  | 345.2967332                                |
| 5984.962317                                    | 0.957990239                     | 0.000637491                                   | 5.22110986                   | 5258.850172                                |
| 1414.798572                                    | 0.96670698                      | 0.00161696                                    | 5.352353118                  | 1278.562676                                |
| 1017.82524                                     | 0.951701446                     | 0.002438504                                   | 4.858397151                  | 877.8132154                                |
| 1565.736423                                    | 0.938057414                     | 0.001978859                                   | 4.549895442                  | 1293.444761                                |
| 436.324045                                     | 0.938288028                     | 0.007140634                                   | 4.55677395                   | 363.1676419                                |
| 2860.354171                                    | 0.952031558                     | 0.001221565                                   | 5.075634807                  | 2467.799152                                |
| 1438.586019                                    | 0.955443568                     | 0.001398501                                   | 5.036327511                  | 1255.325688                                |
| 1342.203034                                    | 0.952640477                     | 0.001637944                                   | 4.938788621                  | 1158.583404                                |
| 1061.544737                                    | 0.949729276                     | 0.002457456                                   | 4.907280488                  | 913.3012072                                |
| 1484.912174                                    | 0.937258272                     | 0.00155037                                    | 4.921049248                  | 1228.003114                                |
| 1399.401206                                    | 0.962932311                     | 0.001749833                                   | 5.030353815                  | 1249.034369                                |
| 2573.626002                                    | 0.954739268                     | 0.001068519                                   | 5.088142042                  | 2240.318803                                |
| 1073.472162                                    | 0.946901949                     | 0.002191707                                   | 4.913101509                  | 912.8497287                                |
| 2047.179421                                    | 0.961321507                     | 0.000948576                                   | 5.201575985                  | 1815.996408                                |
| 670.4579877                                    | 0.941772152                     | 0.004392343                                   | 4.547338608                  | 559.7422902                                |
| 1347.604219                                    | 0.923674461                     | 0.001693606                                   | 4.711141654                  | 1062.977826                                |
| 937.1250065                                    | 0.947911751                     | 0.00349578                                    | 4.846856695                  | 796.4433384                                |
| 1894.824894                                    | 0.961538462                     | 0.001106377                                   | 5.263664252                  | 1682.003812                                |
| 916.8913607                                    | 0.947820491                     | 0.002536498                                   | 4.755942415                  | 778.9321969                                |
| 829.1584633                                    | 0.942984552                     | 0.002694886                                   | 4.737286387                  | 696.6490233                                |
| 638.4928239                                    | 0.938473382                     | 0.004805067                                   | 4.684642346                  | 533.1764566                                |
| 1979.498021                                    | 0.953559261                     | 0.001281126                                   | 5.439722547                  | 1719.022959                                |
| 3999.051352                                    | 0.941438553                     | 0.000863176                                   | 5.211475373                  | 3333.857884                                |
| 1365.980623                                    | 0.967310246                     | 0.001751009                                   | 5.220632344                  | 1234.521096                                |
| 865.0936651                                    | 0.949610594                     | 0.00243052                                    | 4.910173921                  | 744.7812645                                |
| 1405.359842                                    | 0.961194543                     | 0.002141703                                   | 5.002846525                  | 1242.715915                                |
| 1590.14557                                     | 0.953769102                     | 0.001586299                                   | 4.970984609                  | 1374.106514                                |
| 1786.71219                                     | 0.949494138                     | 0.002165975                                   | 4.839377239                  | 1531.287584                                |
| 862.7981684                                    | 0.942994908                     | 0.003307304                                   | 4.633618642                  | 721.4963495                                |
| 1522.528542                                    | 0.961554905                     | 0.00150149                                    | 5.106599022                  | 1355.892884                                |
| 1632.555171                                    | 0.967861701                     | 0.002877955                                   | 5.477143657                  | 1474.688423                                |
| 1378.375467                                    | 0.945354257                     | 0.00207015                                    | 4.92383924                   | 1162.273034                                |
| 1444.960216                                    | 0.9111702                       | 0.001652806                                   | 4.457879356                  | 1099.166536                                |
| 314.9252234                                    | 0.917269519                     | 0.007315546                                   | 4.28679127                   | 243.5810876                                |
| 1005.62013                                     | 0.959346517                     | 0.002146201                                   | 4.98357328                   | 889.5312372                                |
| 947.0428008                                    | 0.903193412                     | 0.002939509                                   | 4.336862216                  | 695.7775273                                |
| 1323.440634                                    | 0.942976939                     | 0.001781005                                   | 4.841203894                  | 1110.297518                                |
| 969.293782                                     | 0.930342815                     | 0.002506075                                   | 4.746091044                  | 777.844975                                 |
| 950.188378                                     | 0.937894073                     | 0.002580807                                   | 4.591955022                  | 784.6942102                                |
| 2081.976547                                    | 0.939639126                     | 0.001452595                                   | 4.966435483                  | 1735.465445                                |
| 1568.800929                                    | 0.923076923                     | 0.002902935                                   | 4.741065584                  | 1245.752443                                |
| 1707.599451                                    | 0.962248918                     | 0.001323175                                   | 5.039484302                  | 1515.715978                                |
| 1196.287255                                    | 0.954733671                     | 0.002028182                                   | 5.012635093                  | 1041.716587                                |
| 1194.738813                                    | 0.944941725                     | 0.00170925                                    | 4.763391373                  | 1008.998475                                |
| 1035.463838                                    | 0.949183399                     | 0.001911182                                   | 4.858482268                  | 886.2514545                                |
| 1542.211637                                    | 0.953423549                     | 0.001373543                                   | 5.069778573                  | 1337.849492                                |
| 1384.907362                                    | 0.948745255                     | 0.001782617                                   | 5.054224746                  | 1181.099073                                |
| 1709.697834                                    | 0.947028139                     | 0.002158547                                   | 4.976320896                  | 1446.401769                                |
| 395.9337473                                    | 0.919387567                     | 0.007763966                                   | 4.40405241                   | 309.9386232                                |
| 2278.744232                                    | 0.947163678                     | 0.000899886                                   | 5.100086564                  | 1943.407096                                |

| wavelet.LHL_glrjm_RunLengthNonUniformityNormalized | wavelet.LHL_glszm_GrayLevelVariance | wavelet.LHL_glszm_SmallAreaHighGrayLevelEmphasis | wavelet.LHL_glszm_GrayLevelNonUniformityNormalized |
|----------------------------------------------------|-------------------------------------|--------------------------------------------------|----------------------------------------------------|
| 0.93823793                                         | 107.7559421                         | 1237.201736                                      | 0.028212543                                        |
| 0.901490588                                        | 61.0659267                          | 972.9132031                                      | 0.041359695                                        |
| 0.883116397                                        | 47.57163006                         | 390.4541003                                      | 0.043865636                                        |
| 0.902903691                                        | 71.74755113                         | 1751.871703                                      | 0.039916262                                        |
| 0.902085193                                        | 54.07650843                         | 496.4319532                                      | 0.039875256                                        |
| 0.936474268                                        | 65.26                               | 508.7040466                                      | 0.035770975                                        |
| 0.904340573                                        | 60.61016057                         | 1081.949359                                      | 0.037974053                                        |
| 0.87686494                                         | 55.30517881                         | 1123.207721                                      | 0.043387666                                        |
| 0.881139788                                        | 52.22832448                         | 806.966079                                       | 0.042279979                                        |
| 0.915266442                                        | 59.2179332                          | 823.9625284                                      | 0.040601052                                        |
| 0.890029285                                        | 35.44966559                         | 389.9270789                                      | 0.049910309                                        |
| 0.911114774                                        | 80.42130178                         | 1323.034281                                      | 0.034880473                                        |
| 0.826946666                                        | 79.58990398                         | 1169.261704                                      | 0.041224691                                        |
| 0.891779812                                        | 61.38389382                         | 822.3764234                                      | 0.038751508                                        |
| 0.918389215                                        | 114.5193267                         | 1711.445292                                      | 0.030514781                                        |
| 0.900323253                                        | 54.60258074                         | 1380.699364                                      | 0.039575516                                        |
| 0.927289171                                        | 83.92015258                         | 1328.228791                                      | 0.033079865                                        |
| 0.868323322                                        | 56.45321103                         | 628.4272513                                      | 0.045746804                                        |
| 0.885724431                                        | 29.66991646                         | 229.8638852                                      | 0.053772283                                        |
| 0.916285934                                        | 85.60007444                         | 1952.445363                                      | 0.034308079                                        |
| 0.818034964                                        | 34.14525551                         | 402.4162783                                      | 0.052166204                                        |
| 0.913123598                                        | 50.75989424                         | 551.486417                                       | 0.043431069                                        |
| 0.927184455                                        | 87.51113805                         | 532.5781177                                      | 0.032557375                                        |
| 0.907522136                                        | 41.91794191                         | 452.3370896                                      | 0.04503464                                         |
| 0.909273413                                        | 93.64981061                         | 1316.884901                                      | 0.036983685                                        |
| 0.906416208                                        | 56.75149537                         | 725.7016732                                      | 0.039568261                                        |
| 0.918702294                                        | 83.81896954                         | 1172.202363                                      | 0.032595827                                        |
| 0.893672076                                        | 58.21078993                         | 1126.171448                                      | 0.041365855                                        |
| 0.923229621                                        | 58.32269287                         | 1173.04675                                       | 0.042785645                                        |
| 0.905637877                                        | 61.85681708                         | 958.6578107                                      | 0.039491277                                        |
| 0.860931561                                        | 58.20473435                         | 590.1477787                                      | 0.04100831                                         |
| 0.903610791                                        | 55.17777473                         | 799.7636951                                      | 0.039766731                                        |
| 0.916979971                                        | 72.29412492                         | 1384.308516                                      | 0.034683817                                        |
| 0.922291976                                        | 60.73941684                         | 624.5992265                                      | 0.036820314                                        |
| 0.905032913                                        | 46.5402553                          | 725.543696                                       | 0.042412295                                        |
| 0.868307174                                        | 50.21398044                         | 604.0312413                                      | 0.044553428                                        |
| 0.885507231                                        | 70.17974347                         | 1174.121513                                      | 0.041554454                                        |
| 0.87776161                                         | 77.94491372                         | 1192.517482                                      | 0.034540128                                        |
| 0.921150113                                        | 52.75454152                         | 790.4463974                                      | 0.04213269                                         |
| 0.915032851                                        | 71.50293355                         | 1819.041048                                      | 0.035330509                                        |
| 0.878251418                                        | 48.32419563                         | 508.1983997                                      | 0.042640306                                        |
| 0.936287939                                        | 84.10335788                         | 944.551088                                       | 0.032368474                                        |
| 0.896258581                                        | 63.996011                           | 1021.039222                                      | 0.038792165                                        |
| 0.929775795                                        | 78.44909827                         | 1109.689513                                      | 0.034024524                                        |
| 0.918619729                                        | 57.09801553                         | 520.8963257                                      | 0.040851006                                        |
| 0.900124799                                        | 50.23185877                         | 717.3809721                                      | 0.04216267                                         |
| 0.893726606                                        | 61.30029315                         | 1793.322438                                      | 0.038860741                                        |
| 0.894481116                                        | 117.4661536                         | 2083.123535                                      | 0.038937024                                        |
| 0.919577427                                        | 78.47853993                         | 2053.044884                                      | 0.037724949                                        |
| 0.872634716                                        | 52.77955829                         | 282.2020917                                      | 0.046909384                                        |
| 0.920658299                                        | 99.19790271                         | 3923.535354                                      | 0.033176639                                        |
| 0.935495932                                        | 90.42136787                         | 961.6499757                                      | 0.030747617                                        |
| 0.908854074                                        | 55.57056424                         | 637.6358557                                      | 0.041472851                                        |
| 0.883447291                                        | 38.39419087                         | 820.13121                                        | 0.050464007                                        |
| 0.885149884                                        | 37.53803183                         | 252.6013118                                      | 0.049252344                                        |
| 0.90891334                                         | 90.93108041                         | 1752.98745                                       | 0.036378874                                        |
| 0.91508631                                         | 63.71165951                         | 915.3142561                                      | 0.037145795                                        |
| 0.909720337                                        | 55.80636597                         | 811.7499552                                      | 0.03993156                                         |
| 0.904681498                                        | 63.89366579                         | 676.2795709                                      | 0.038102723                                        |
| 0.88583003                                         | 58.41846916                         | 903.4895042                                      | 0.039603377                                        |
| 0.92830345                                         | 62.22834875                         | 925.0571132                                      | 0.037562373                                        |
| 0.914859849                                        | 91.80507741                         | 1705.644256                                      | 0.035453408                                        |
| 0.900522918                                        | 57.68841141                         | 656.6865126                                      | 0.039079926                                        |
| 0.925897336                                        | 77.16637625                         | 1325.489779                                      | 0.033785244                                        |
| 0.892448999                                        | 40.23470222                         | 379.0113011                                      | 0.048711911                                        |
| 0.861821908                                        | 51.47982877                         | 743.778052                                       | 0.044406851                                        |
| 0.902752815                                        | 56.07892148                         | 562.3293071                                      | 0.040800533                                        |
| 0.92601647                                         | 80.53069507                         | 1228.024439                                      | 0.032504262                                        |
| 0.902891048                                        | 44.24832272                         | 549.544736                                       | 0.045000042                                        |
| 0.892830822                                        | 45.0154685                          | 467.0572689                                      | 0.045298665                                        |
| 0.884829102                                        | 51.77657215                         | 390.4083783                                      | 0.045096692                                        |
| 0.912055792                                        | 112.1283898                         | 1234.422166                                      | 0.028574959                                        |
| 0.892832514                                        | 104.2483553                         | 2537.073114                                      | 0.030414341                                        |
| 0.936776613                                        | 81.14714254                         | 919.5870609                                      | 0.032803178                                        |
| 0.904717317                                        | 52.60806938                         | 542.9817643                                      | 0.039889307                                        |
| 0.926490257                                        | 62.6054847                          | 915.4462582                                      | 0.038619094                                        |
| 0.91221091                                         | 66.37657975                         | 973.6481325                                      | 0.038848789                                        |
| 0.904381065                                        | 63.09994706                         | 1082.968803                                      | 0.042211548                                        |
| 0.892621897                                        | 41.43509344                         | 476.6399477                                      | 0.047397686                                        |
| 0.925535812                                        | 71.70751099                         | 1009.991953                                      | 0.034889599                                        |
| 0.938619488                                        | 109.6522118                         | 1108.42565                                       | 0.028208591                                        |
| 0.898365774                                        | 73.58565444                         | 851.5968969                                      | 0.038017427                                        |
| 0.840364149                                        | 40.18695684                         | 794.731146                                       | 0.050432327                                        |
| 0.849331599                                        | 21.69182617                         | 156.9056672                                      | 0.060949919                                        |
| 0.921828363                                        | 56.0020798                          | 655.2766306                                      | 0.038127108                                        |
| 0.830117099                                        | 32.29832111                         | 472.8505576                                      | 0.057127473                                        |
| 0.894355545                                        | 56.36653754                         | 807.5723549                                      | 0.041929418                                        |
| 0.873234722                                        | 55.01276899                         | 610.4463705                                      | 0.041597225                                        |
| 0.884734248                                        | 38.85869509                         | 555.9978823                                      | 0.047623115                                        |
| 0.887519609                                        | 77.20446347                         | 1275.875625                                      | 0.036563092                                        |
| 0.859518341                                        | 74.10246098                         | 927.9266681                                      | 0.039973613                                        |
| 0.927587129                                        | 61.87340034                         | 1086.519629                                      | 0.037220771                                        |
| 0.913666059                                        | 64.00655582                         | 765.2795312                                      | 0.037805761                                        |
| 0.896183034                                        | 47.23132742                         | 702.4406753                                      | 0.043929288                                        |
| 0.904067895                                        | 47.62196783                         | 610.4641658                                      | 0.041924867                                        |
| 0.912741714                                        | 69.76510027                         | 987.310875                                       | 0.035105415                                        |
| 0.904690209                                        | 70.50953312                         | 854.4755096                                      | 0.035766753                                        |
| 0.902320401                                        | 78.2027275                          | 1038.339981                                      | 0.037181744                                        |
| 0.853920346                                        | 29.20015956                         | 225.80358                                        | 0.05656352                                         |
| 0.900404555                                        | 74.74367689                         | 1416.016301                                      | 0.03561884                                         |

| wavelet.LHL_glszm_SizeZoneNonUniformityNormalized | wavelet.LHL_glszm_SizeZoneNonUniformity | wavelet.LHL_glszm_GrayLevelNonUniformity | wavelet.LHL_glszm_LargeAreaEmphasis | wavelet.LHL_glszm_ZoneVariance |
|---------------------------------------------------|-----------------------------------------|------------------------------------------|-------------------------------------|--------------------------------|
| 0.563139253                                       | 784.4529792                             | 39.30007179                              | 4.028715004                         | 1.70817785                     |
| 0.436346398                                       | 202.9010753                             | 19.23225806                              | 8.694623656                         | 4.651497283                    |
| 0.443152708                                       | 315.0815752                             | 31.18846695                              | 15.27707454                         | 10.62216209                    |
| 0.465403303                                       | 235.4940711                             | 20.19762846                              | 9.148221344                         | 5.420116702                    |
| 0.460476419                                       | 546.5855097                             | 47.33192923                              | 10.63352991                         | 6.653723396                    |
| 0.521303855                                       | 218.947619                              | 15.02380952                              | 3.995238095                         | 1.52585034                     |
| 0.498061662                                       | 1473.266396                             | 112.327481                               | 21.48174442                         | 17.83206873                    |
| 0.47414625                                        | 1072.04467                              | 98.09951349                              | 33.70367094                         | 28.59978862                    |
| 0.475704494                                       | 975.6699171                             | 86.71623598                              | 29.07697722                         | 24.15791467                    |
| 0.493936207                                       | 298.831405                              | 24.56363636                              | 6.509090909                         | 3.36945837                     |
| 0.454525531                                       | 319.0769231                             | 35.03703704                              | 18.2022792                          | 13.58773874                    |
| 0.532888757                                       | 692.7553846                             | 45.34461538                              | 9.606923077                         | 6.463121302                    |
| 0.51070727                                        | 344.7274074                             | 27.82666667                              | 214.197037                          | 206.5466908                    |
| 0.468057922                                       | 383.3394383                             | 31.73748474                              | 16.77045177                         | 12.37531103                    |
| 0.529634763                                       | 612.2577855                             | 35.27508651                              | 7.288927336                         | 4.343368734                    |
| 0.487116353                                       | 1095.524678                             | 89.0053357                               | 13.27345487                         | 9.487497531                    |
| 0.502581433                                       | 361.3560501                             | 23.78442281                              | 4.648122392                         | 1.890397922                    |
| 0.444958052                                       | 222.0340681                             | 22.82765531                              | 23.58116232                         | 17.47560853                    |
| 0.420636008                                       | 241.0244328                             | 30.81151832                              | 13.82547993                         | 8.694029464                    |
| 0.522197428                                       | 1543.093401                             | 101.3803723                              | 6.96751269                          | 3.872056482                    |
| 0.430844462                                       | 402.8395722                             | 48.77540107                              | 225.6299465                         | 215.1697378                    |
| 0.50081406                                        | 293.9778535                             | 25.49403748                              | 7.459965928                         | 4.081133242                    |
| 0.517087714                                       | 317.4918567                             | 19.99022801                              | 4.93485342                          | 2.153455209                    |
| 0.488233254                                       | 679.6206897                             | 62.68821839                              | 9.904454023                         | 6.288445778                    |
| 0.513678787                                       | 362.6572238                             | 26.11048159                              | 9.058073654                         | 5.806845814                    |
| 0.484465326                                       | 608.0039841                             | 49.65816733                              | 9.855776892                         | 6.292556626                    |
| 0.534237627                                       | 1021.462343                             | 62.3232176                               | 6.546548117                         | 3.687406722                    |
| 0.474719771                                       | 641.3464101                             | 55.88527017                              | 13.21983716                         | 9.040218584                    |
| 0.465759277                                       | 119.234375                              | 10.953125                                | 4.91015625                          | 1.861312866                    |
| 0.473570813                                       | 502.9322034                             | 41.93973635                              | 9.197740113                         | 5.457049025                    |
| 0.473570637                                       | 899.7842105                             | 77.91578947                              | 17.91578947                         | 130.7573507                    |
| 0.458411644                                       | 482.2490494                             | 41.83460076                              | 12.38307985                         | 8.515052805                    |
| 0.510464646                                       | 953.0374933                             | 64.75468666                              | 6.268344938                         | 3.27713115                     |
| 0.484989365                                       | 655.7056213                             | 49.78106509                              | 5.880177515                         | 2.858957582                    |
| 0.479335971                                       | 1095.76203                              | 96.95450569                              | 9.765529309                         | 6.054091664                    |
| 0.442935047                                       | 546.5818476                             | 54.97893031                              | 32.23419773                         | 26.32780104                    |
| 0.475915647                                       | 816.1953353                             | 71.26588921                              | 33.49446064                         | 28.78695238                    |
| 0.453199885                                       | 1101.27572                              | 83.93251029                              | 26.90411523                         | 22.39329862                    |
| 0.482416377                                       | 340.1035461                             | 29.7035461                               | 5.912056738                         | 2.868145466                    |
| 0.496535576                                       | 2053.174607                             | 146.0916566                              | 6.781136638                         | 3.69000291                     |
| 0.443392857                                       | 496.6                                   | 47.75714286                              | 27.66071429                         | 22.29652742                    |
| 0.54000203                                        | 1345.140506                             | 80.62986752                              | 4.023685267                         | 1.613774905                    |
| 0.464680057                                       | 835.9594219                             | 69.78710395                              | 13.04558088                         | 8.922356037                    |
| 0.521820336                                       | 811.9524422                             | 52.94215938                              | 4.353470437                         | 1.796759868                    |
| 0.49022864                                        | 361.2985075                             | 30.10719132                              | 5.861601085                         | 2.854647449                    |
| 0.45878822                                        | 633.5865315                             | 58.22664736                              | 9.877624909                         | 5.926713057                    |
| 0.472177394                                       | 1034.068493                             | 85.10502283                              | 19.12420091                         | 14.78487438                    |
| 0.458413841                                       | 194.8258824                             | 16.54823529                              | 10.01176471                         | 5.811676125                    |
| 0.495396433                                       | 248.1936128                             | 18.9001996                               | 5.419161677                         | 2.533910223                    |
| 0.44771138                                        | 256.0909091                             | 26.83216783                              | 40.55244755                         | 34.96567069                    |
| 0.516710379                                       | 775.5822785                             | 49.79813458                              | 5.826115923                         | 2.896795874                    |
| 0.526786531                                       | 1140.492841                             | 66.56859122                              | 3.847113164                         | 1.42272752                     |
| 0.480827643                                       | 1161.198758                             | 100.1569358                              | 9.328634389                         | 5.837733627                    |
| 0.413431243                                       | 199.2738589                             | 24.32365145                              | 18.8340249                          | 13.58783423                    |
| 0.433028376                                       | 257.2188552                             | 29.25589226                              | 15.99326599                         | 10.97988867                    |
| 0.486102716                                       | 516.7271872                             | 38.67074318                              | 8.265286924                         | 4.900150358                    |
| 0.50061488                                        | 1137.397007                             | 84.39524648                              | 7.022447183                         | 3.852730849                    |
| 0.467902042                                       | 873.5731119                             | 74.55222282                              | 8.013926085                         | 4.583395134                    |
| 0.509353416                                       | 439.062645                              | 32.84454756                              | 11.69837587                         | 8.043270654                    |
| 0.477149079                                       | 2067.486961                             | 171.6014309                              | 72.21440111                         | 67.77556576                    |
| 0.513823114                                       | 562.1224863                             | 41.09323583                              | 4.230347349                         | 1.6245133                      |
| 0.538034549                                       | 824.2689295                             | 54.31462141                              | 7.754569191                         | 4.717148184                    |
| 0.493845889                                       | 1477.586898                             | 116.927139                               | 17.36664439                         | 13.62309195                    |
| 0.512960307                                       | 2351.92301                              | 154.9053435                              | 5.465430752                         | 2.701207222                    |
| 0.424279778                                       | 161.2263158                             | 18.51052632                              | 10.15263158                         | 5.830609418                    |
| 0.469047138                                       | 747.1920904                             | 70.74011299                              | 120.5373509                         | 114.6598462                    |
| 0.475511748                                       | 324.7745242                             | 27.86676428                              | 9.288433382                         | 5.643297055                    |
| 0.516804083                                       | 1951.969023                             | 122.7685994                              | 5.017209425                         | 2.279003758                    |
| 0.489587691                                       | 1471.700599                             | 135.2701264                              | 14.01097804                         | 10.2145734                     |
| 0.416805777                                       | 553.5180723                             | 60.15662651                              | 13.9503012                          | 9.188178164                    |
| 0.439013069                                       | 252.8715278                             | 25.97569444                              | 18.80729167                         | 13.72132704                    |
| 0.500489372                                       | 1191.164706                             | 68.00840336                              | 9.623529412                         | 6.374447426                    |
| 0.543111133                                       | 633.2675815                             | 35.46312178                              | 20.57890223                         | 16.7586543                     |
| 0.537096064                                       | 786.8457338                             | 48.05665529                              | 3.845051195                         | 1.467350348                    |
| 0.469312631                                       | 779.9975933                             | 66.29602888                              | 9.764741276                         | 6.215756827                    |
| 0.521524838                                       | 419.3059701                             | 31.04975124                              | 5.144278607                         | 2.358202767                    |
| 0.504499139                                       | 671.4883546                             | 51.70773854                              | 7.478587528                         | 4.238046559                    |
| 0.47470248                                        | 239.7247525                             | 21.31683168                              | 9.338613861                         | 5.739892167                    |
| 0.423457279                                       | 331.5670498                             | 37.11238825                              | 12.8339719                          | 8.081237797                    |
| 0.507770997                                       | 712.4027085                             | 48.95010691                              | 5.414825374                         | 2.635463463                    |
| 0.561241597                                       | 738.0326996                             | 37.09429658                              | 3.91026616                          | 1.62322659                     |
| 0.505761319                                       | 459.2312775                             | 34.51982379                              | 12.87114537                         | 8.945684712                    |
| 0.459068542                                       | 553.1775934                             | 60.77095436                              | 194.7062241                         | 187.346598                     |
| 0.395787006                                       | 420.3258004                             | 64.72881356                              | 64.29849341                         | 55.92558989                    |
| 0.498579852                                       | 706.48765                               | 54.0261115                               | 5.44460127                          | 2.481927039                    |
| 0.454457125                                       | 225.8651911                             | 28.39235412                              | 194.6317907                         | 185.1300155                    |
| 0.483745102                                       | 576.6241611                             | 49.97986577                              | 17.74748322                         | 13.74412681                    |
| 0.496562655                                       | 591.9026846                             | 49.58389262                              | 17.64597315                         | 66.35442942                    |
| 0.471355776                                       | 314.3943028                             | 31.76461769                              | 23.00449775                         | 18.18690055                    |
| 0.492357885                                       | 488.9113797                             | 36.30715005                              | 19.80362538                         | 15.64498316                    |
| 0.47507634                                        | 252.2655367                             | 21.2259887                               | 41.90207156                         | 35.87139356                    |
| 0.508115011                                       | 725.5882353                             | 53.1512605                               | 4.987394958                         | 2.204946685                    |
| 0.499015844                                       | 1427.185315                             | 108.1244755                              | 8.855594406                         | 5.571388699                    |
| 0.451554646                                       | 725.1967621                             | 70.55043587                              | 12.65877958                         | 8.436599055                    |
| 0.441326699                                       | 964.7401647                             | 91.64775846                              | 10.0978957                          | 6.134408517                    |
| 0.515540876                                       | 983.6519916                             | 66.98113208                              | 13.63522013                         | 10.41857412                    |
| 0.485339164                                       | 721.2139973                             | 53.14939435                              | 8.715343203                         | 5.121690738                    |
| 0.492017948                                       | 267.1657459                             | 20.18968692                              | 10.28913444                         | 6.571268683                    |
| 0.439277134                                       | 146.7185629                             | 18.89221557                              | 46.80838323                         | 40.57334433                    |
| 0.475818697                                       | 1416.512261                             | 106.0372859                              | 10.34598589                         | 6.584184266                    |

| wavelet.LHL_glszm_ZonePercentage | wavelet.LHL_glszm_LargeAreaLowGrayLevelEmphasis | wavelet.LHL_glszm_LargeAreaHighGrayLevelEmphasis | wavelet.LHL_glszm_HighGrayLevelZoneEmphasis |
|----------------------------------|-------------------------------------------------|--------------------------------------------------|---------------------------------------------|
| 0.656456173                      | 0.00399941                                      | 6805.196698                                      | 1615.737258                                 |
| 0.497326203                      | 0.008509199                                     | 12744.83871                                      | 1434.047312                                 |
| 0.463494133                      | 0.032120627                                     | 8502.542897                                      | 567.2320675                                 |
| 0.517911975                      | 0.005811346                                     | 22672.99012                                      | 2524.150198                                 |
| 0.501266892                      | 0.018378176                                     | 7392.558551                                      | 712.4507161                                 |
| 0.636363636                      | 0.013096718                                     | 2652.611905                                      | 680.3                                       |
| 0.523447177                      | 0.016536801                                     | 29476.36579                                      | 1478.140297                                 |
| 0.442638998                      | 0.022532653                                     | 52203.70323                                      | 1583.074303                                 |
| 0.45116586                       | 0.027596218                                     | 32226.13896                                      | 1132.9098                                   |
| 0.564365672                      | 0.007864907                                     | 7662.102479                                      | 1141.573554                                 |
| 0.465517241                      | 0.037233704                                     | 10160.42023                                      | 549.2920228                                 |
| 0.563991323                      | 0.009553814                                     | 15867.81923                                      | 1746.316923                                 |
| 0.361542582                      | 0.144219285                                     | 324665.1067                                      | 1581.008889                                 |
| 0.476994758                      | 0.017732468                                     | 17965.04151                                      | 1141.296703                                 |
| 0.58266129                       | 0.004675064                                     | 16196.59862                                      | 2267.848616                                 |
| 0.513939671                      | 0.007736301                                     | 24870.36327                                      | 1911.679858                                 |
| 0.602177554                      | 0.008814355                                     | 7955.859527                                      | 1790.67872                                  |
| 0.404703974                      | 0.02912856                                      | 22380.57114                                      | 934.4649299                                 |
| 0.441448382                      | 0.050797186                                     | 4898.361257                                      | 339.6265271                                 |
| 0.568378534                      | 0.003138009                                     | 18191.09712                                      | 2613.256514                                 |
| 0.309193122                      | 0.393196859                                     | 131123.3861                                      | 598.7540107                                 |
| 0.544022243                      | 0.013125335                                     | 5924.693356                                      | 768.6712095                                 |
| 0.599609375                      | 0.016151837                                     | 3640.946254                                      | 718.6335505                                 |
| 0.525878353                      | 0.018977886                                     | 6245.28592                                       | 631.6889368                                 |
| 0.554595444                      | 0.007267816                                     | 15461.25496                                      | 1784.536827                                 |
| 0.529759392                      | 0.01427909                                      | 9541.521116                                      | 1003.282072                                 |
| 0.591401175                      | 0.005094378                                     | 10437.26098                                      | 1554.934623                                 |
| 0.489138306                      | 0.009625112                                     | 20475.98742                                      | 1584.064397                                 |
| 0.572706935                      | 0.007147127                                     | 7999.753906                                      | 1641.492188                                 |
| 0.517039922                      | 0.008826943                                     | 13032.14783                                      | 1358.399247                                 |
| 0.399327449                      | 0.177792482                                     | 107980.9689                                      | 828.91                                      |
| 0.508458192                      | 0.011977786                                     | 14785.23954                                      | 1147.693916                                 |
| 0.578197584                      | 0.004226748                                     | 11536.15694                                      | 1857.820568                                 |
| 0.575319149                      | 0.009010124                                     | 5173.528846                                      | 867.5599112                                 |
| 0.519073569                      | 0.010482099                                     | 10135.89676                                      | 1018.8014                                   |
| 0.41147049                       | 0.039837867                                     | 27480.7966                                       | 876.3338736                                 |
| 0.460897608                      | 0.021739625                                     | 54161.94461                                      | 1635.293294                                 |
| 0.470838985                      | 0.017670676                                     | 43133.33704                                      | 1707.146914                                 |
| 0.573170732                      | 0.007435071                                     | 6692.378723                                      | 1107.668085                                 |
| 0.568775791                      | 0.003159729                                     | 16758.77799                                      | 2478.858767                                 |
| 0.431765613                      | 0.040067619                                     | 20477.58839                                      | 742.69375                                   |
| 0.644168606                      | 0.004634557                                     | 4919.945403                                      | 1234.405058                                 |
| 0.492471941                      | 0.00985377                                      | 19536.01112                                      | 1462.980545                                 |
| 0.625401929                      | 0.003973063                                     | 6705.771208                                      | 1490.77892                                  |
| 0.576682316                      | 0.023678202                                     | 4252.556309                                      | 713                                         |
| 0.503096539                      | 0.01108487                                      | 10114.44461                                      | 1025.018827                                 |
| 0.480052609                      | 0.008375265                                     | 46965.33105                                      | 2526.808219                                 |
| 0.487944891                      | 0.005903332                                     | 29772.22824                                      | 2988.912941                                 |
| 0.588719154                      | 0.003954123                                     | 15827.92415                                      | 2845.742515                                 |
| 0.423076923                      | 0.147488545                                     | 12114.45105                                      | 384.9493007                                 |
| 0.584274037                      | 0.00180446                                      | 30751.62625                                      | 5252.830779                                 |
| 0.642242658                      | 0.00444372                                      | 4924.737644                                      | 1276.229561                                 |
| 0.535239362                      | 0.013402825                                     | 8028.41118                                       | 882.3175983                                 |
| 0.436594203                      | 0.017010931                                     | 24298.86722                                      | 1263.394191                                 |
| 0.446616541                      | 0.057672358                                     | 5453.63468                                       | 370.8771044                                 |
| 0.545128205                      | 0.00470653                                      | 20463.82596                                      | 2443.50047                                  |
| 0.561681088                      | 0.006612438                                     | 8842.680898                                      | 1247.319982                                 |
| 0.539907461                      | 0.008155363                                     | 9468.916443                                      | 1145.902517                                 |
| 0.523058252                      | 0.015815066                                     | 10278.66009                                      | 919.8294664                                 |
| 0.474641253                      | 0.065278689                                     | 82208.05931                                      | 1252.597046                                 |
| 0.619479049                      | 0.004880278                                     | 5309.432358                                      | 1244.230347                                 |
| 0.573782772                      | 0.004485282                                     | 17095.04243                                      | 2243.020888                                 |
| 0.516842287                      | 0.022009697                                     | 15116.05348                                      | 908.6233289                                 |
| 0.601469238                      | 0.003628782                                     | 10017.81178                                      | 1796.313195                                 |
| 0.481012658                      | 0.023749367                                     | 5642.589474                                      | 561.1552632                                 |
| 0.41248058                       | 0.120077507                                     | 122617.8242                                      | 1056.286252                                 |
| 0.523773006                      | 0.015997379                                     | 7467.531479                                      | 789.7510981                                 |
| 0.60432                          | 0.003832384                                     | 8485.755891                                      | 1661.966905                                 |
| 0.51323203                       | 0.020538193                                     | 10805.74019                                      | 767.8153693                                 |
| 0.458247067                      | 0.023500718                                     | 9456.193524                                      | 696.9563253                                 |
| 0.443418014                      | 0.044032396                                     | 9416.984375                                      | 556.4652778                                 |
| 0.554778555                      | 0.007299206                                     | 15607.29664                                      | 1707.660924                                 |
| 0.511627907                      | 0.007240976                                     | 67477.1681                                       | 3331.287307                                 |
| 0.648517043                      | 0.004556423                                     | 4800.974744                                      | 1221.972696                                 |
| 0.530820824                      | 0.015438814                                     | 7141.138387                                      | 758.2743682                                 |
| 0.599105812                      | 0.006247774                                     | 6546.896766                                      | 1226.993781                                 |
| 0.555509182                      | 0.006731774                                     | 10564.69722                                      | 1340.078137                                 |
| 0.527139875                      | 0.008783542                                     | 14182.12673                                      | 1523.550495                                 |
| 0.458699473                      | 0.021235912                                     | 9529.10728                                       | 708.3014049                                 |
| 0.599828987                      | 0.005190874                                     | 7376.535994                                      | 1355.675695                                 |
| 0.661136249                      | 0.007383618                                     | 5911.785551                                      | 1446.875285                                 |
| 0.504724847                      | 0.013272739                                     | 14953.26542                                      | 1156.705947                                 |
| 0.368614255                      | 0.180983328                                     | 211078.7394                                      | 1120.550207                                 |
| 0.345590628                      | 0.290036749                                     | 15050.5452                                       | 241.4124294                                 |
| 0.58097581                       | 0.00797467                                      | 4837.395907                                      | 891.4446013                                 |
| 0.324412533                      | 0.29026891                                      | 132173.4185                                      | 687.1227364                                 |
| 0.499790356                      | 0.017869051                                     | 19298.04111                                      | 1114.580537                                 |
| 0.434719183                      | 0.101035547                                     | 52149.84983                                      | 821.215604                                  |
| 0.455601093                      | 0.033056105                                     | 17342.65967                                      | 785.6146927                                 |
| 0.49037037                       | 0.013740154                                     | 32219.93051                                      | 1755.645519                                 |
| 0.407208589                      | 0.040219137                                     | 49116.29002                                      | 1285.693032                                 |
| 0.599496222                      | 0.004296835                                     | 7786.883754                                      | 1486.565826                                 |
| 0.551803975                      | 0.010501586                                     | 9201.235315                                      | 1040.590909                                 |
| 0.486666667                      | 0.013995139                                     | 12661.72727                                      | 1007.150685                                 |
| 0.502297794                      | 0.013004382                                     | 8961.102928                                      | 885.2557182                                 |
| 0.557568673                      | 0.011761646                                     | 17352.43187                                      | 1332.919287                                 |
| 0.527511537                      | 0.009134122                                     | 10202.09489                                      | 1180.708614                                 |
| 0.518624642                      | 0.009727795                                     | 15016.70534                                      | 1436.729282                                 |
| 0.400479616                      | 0.170071452                                     | 13852.5479                                       | 318.9131737                                 |
| 0.515587115                      | 0.006050228                                     | 19828.59086                                      | 1960.963722                                 |

| wavelet.LHL_glszm_SmallAreaEmphasis | wavelet.LHL_glszm_LowGrayLevelZoneEmphasis | wavelet.LHL_glszm_ZoneEntropy | wavelet.LHL_glszm_SmallAreaLowGrayLevelEmphasis | wavelet.LHL_ngtdm_Coarseness |
|-------------------------------------|--------------------------------------------|-------------------------------|-------------------------------------------------|------------------------------|
| 0.78987667                          | 0.001743154                                | 6.55973057                    | 0.001514712                                     | 0.003541464                  |
| 0.686952399                         | 0.003068092                                | 6.37483528                    | 0.002832766                                     | 0.007954165                  |
| 0.692241001                         | 0.004794752                                | 6.362084822                   | 0.004076697                                     | 0.004850489                  |
| 0.70932692                          | 0.002453617                                | 6.314454197                   | 0.00233788                                      | 0.007622278                  |
| 0.70568992                          | 0.003274546                                | 6.438309385                   | 0.002722836                                     | 0.003084356                  |
| 0.750214818                         | 0.007755                                   | 6.12415713                    | 0.007265212                                     | 0.010589868                  |
| 0.738637115                         | 0.001328302                                | 6.473119851                   | 0.001129734                                     | 0.01323154                   |
| 0.715876977                         | 0.001238723                                | 6.446754339                   | 0.001039148                                     | 0.01408837                   |
| 0.717178077                         | 0.001776184                                | 6.456906999                   | 0.001482257                                     | 0.01702837                   |
| 0.730583243                         | 0.002877866                                | 6.220858276                   | 0.002607383                                     | 0.005811143                  |
| 0.700716457                         | 0.004264993                                | 6.096001776                   | 0.003433211                                     | 0.004763695                  |
| 0.758015989                         | 0.001638916                                | 6.421530678                   | 0.00084654                                      | 0.003039256                  |
| 0.742245391                         | 0.002809609                                | 6.325744087                   | 0.00251187                                      | 0.004148558                  |
| 0.711496391                         | 0.002546456                                | 6.428693013                   | 0.002240293                                     | 0.004556301                  |
| 0.756037862                         | 0.001653126                                | 6.630687365                   | 0.001506357                                     | 0.003699954                  |
| 0.725715991                         | 0.001052488                                | 6.448683335                   | 0.000900105                                     | 0.001775063                  |
| 0.737103415                         | 0.002356417                                | 6.460618077                   | 0.001148756                                     | 0.006186806                  |
| 0.693362101                         | 0.004992357                                | 6.233346409                   | 0.004659404                                     | 0.005467592                  |
| 0.674044655                         | 0.009835156                                | 6.115397069                   | 0.008100942                                     | 0.005134363                  |
| 0.750630982                         | 0.000801583                                | 6.608987727                   | 0.000700925                                     | 0.01364264                   |
| 0.682514183                         | 0.004450508                                | 6.251351528                   | 0.003854994                                     | 0.002740989                  |
| 0.735461282                         | 0.004664112                                | 6.127256356                   | 0.00340422                                      | 0.006145524                  |
| 0.747072162                         | 0.00647289                                 | 6.441620231                   | 0.005411316                                     | 0.0084253                    |
| 0.726468188                         | 0.004144748                                | 6.213295745                   | 0.002654599                                     | 0.002628442                  |
| 0.744806452                         | 0.002393065                                | 6.400119619                   | 0.002236868                                     | 0.005479902                  |
| 0.723726652                         | 0.002279635                                | 6.383368665                   | 0.00137232                                      | 0.003047546                  |
| 0.759138139                         | 0.001444904                                | 6.525635324                   | 0.001265354                                     | 0.002381388                  |
| 0.716342262                         | 0.001540192                                | 6.425119754                   | 0.001348168                                     | 0.002666865                  |
| 0.709246657                         | 0.004611684                                | 6.086034876                   | 0.004414962                                     | 0.014913425                  |
| 0.715585896                         | 0.002847053                                | 6.45113216                    | 0.002621636                                     | 0.003832143                  |
| 0.715529253                         | 0.003451236                                | 6.494820571                   | 0.002927541                                     | 0.001639081                  |
| 0.704170654                         | 0.002117124                                | 6.425051806                   | 0.001831635                                     | 0.003670662                  |
| 0.742595345                         | 0.001209666                                | 6.524608066                   | 0.001054613                                     | 0.002388996                  |
| 0.723732845                         | 0.002739234                                | 6.40246784                    | 0.002326386                                     | 0.003052043                  |
| 0.719971666                         | 0.001720228                                | 6.365868117                   | 0.001419673                                     | 0.01608825                   |
| 0.692211694                         | 0.002583101                                | 6.468609559                   | 0.002169159                                     | 0.002343504                  |
| 0.713787186                         | 0.001483006                                | 6.499611043                   | 0.001294243                                     | 0.001920644                  |
| 0.69984526                          | 0.001250402                                | 6.771231527                   | 0.00105164                                      | 0.001693124                  |
| 0.721936188                         | 0.002836971                                | 6.220350265                   | 0.002537278                                     | 0.005437572                  |
| 0.732638163                         | 0.000749363                                | 6.583763152                   | 0.000633167                                     | 0.01040451                   |
| 0.692255801                         | 0.00321006                                 | 6.414234171                   | 0.002721846                                     | 0.002884107                  |
| 0.763417401                         | 0.001871502                                | 6.498240453                   | 0.001630355                                     | 0.001772689                  |
| 0.708564858                         | 0.001561434                                | 6.565601104                   | 0.001326898                                     | 0.002041766                  |
| 0.750550602                         | 0.001610097                                | 6.445415336                   | 0.001412956                                     | 0.002752484                  |
| 0.728030783                         | 0.005375505                                | 6.260527804                   | 0.003661175                                     | 0.005325835                  |
| 0.70447422                          | 0.002039674                                | 6.44650873                    | 0.001710953                                     | 0.002655873                  |
| 0.714618062                         | 0.00090888                                 | 6.53854834                    | 0.000791673                                     | 0.001733007                  |
| 0.703941778                         | 0.002833519                                | 6.519096462                   | 0.002733341                                     | 0.008914538                  |
| 0.731219347                         | 0.00241217                                 | 6.221874933                   | 0.002315138                                     | 0.007077044                  |
| 0.695134307                         | 0.010059364                                | 6.202489891                   | 0.008749879                                     | 0.005090375                  |
| 0.746918104                         | 0.000876941                                | 6.605648428                   | 0.000826914                                     | 0.00280754                   |
| 0.754270065                         | 0.001769842                                | 6.583191324                   | 0.001499913                                     | 0.002301933                  |
| 0.721066462                         | 0.002843866                                | 6.421384176                   | 0.002372277                                     | 0.001538055                  |
| 0.667954692                         | 0.002995637                                | 6.17289924                    | 0.002728592                                     | 0.006272753                  |
| 0.683785775                         | 0.009792461                                | 6.179697142                   | 0.008554142                                     | 0.005378568                  |
| 0.724650294                         | 0.001700127                                | 6.539025162                   | 0.00157699                                      | 0.004180275                  |
| 0.735592435                         | 0.001554483                                | 6.475556664                   | 0.001308959                                     | 0.001835444                  |
| 0.711263563                         | 0.001913132                                | 6.447536127                   | 0.001619019                                     | 0.002034463                  |
| 0.741648822                         | 0.00309091                                 | 6.329899917                   | 0.002753117                                     | 0.004234877                  |
| 0.71820342                          | 0.001530825                                | 6.547667434                   | 0.001089852                                     | 0.000867301                  |
| 0.745185309                         | 0.002060368                                | 6.301085632                   | 0.001821864                                     | 0.003820386                  |
| 0.71669611                          | 0.001350149                                | 6.484160875                   | 0.00123457                                      | 0.002579817                  |
| 0.730625973                         | 0.002625346                                | 6.445353663                   | 0.002279362                                     | 0.01321363                   |
| 0.744463194                         | 0.001038662                                | 6.579218092                   | 0.000879585                                     | 0.000983411                  |
| 0.676242943                         | 0.005623415                                | 6.125751443                   | 0.004720447                                     | 0.008099007                  |
| 0.711824908                         | 0.00196117                                 | 6.388628782                   | 0.001650075                                     | 0.002042692                  |
| 0.716483559                         | 0.004526467                                | 6.266831833                   | 0.003935995                                     | 0.005293956                  |
| 0.747209018                         | 0.001230571                                | 6.611244747                   | 0.00104734                                      | 0.001121083                  |
| 0.727351987                         | 0.003048747                                | 6.312265673                   | 0.002634919                                     | 0.001260594                  |
| 0.670616245                         | 0.003190464                                | 6.466576996                   | 0.002597498                                     | 0.002517913                  |
| 0.688696815                         | 0.006708184                                | 6.334138987                   | 0.005933331                                     | 0.005758658                  |
| 0.735485494                         | 0.001523963                                | 6.841072831                   | 0.001328185                                     | 0.002008269                  |
| 0.764555322                         | 0.001211893                                | 6.583607458                   | 0.001137266                                     | 0.003534667                  |
| 0.761416285                         | 0.002007341                                | 6.435223602                   | 0.001772426                                     | 0.002960136                  |
| 0.712340815                         | 0.002631775                                | 6.418468531                   | 0.002145307                                     | 0.002358846                  |
| 0.750278783                         | 0.002714902                                | 6.222820547                   | 0.002476346                                     | 0.005315866                  |
| 0.738262805                         | 0.001981636                                | 6.40330173                    | 0.00177064                                      | 0.00291381                   |
| 0.716055728                         | 0.003137865                                | 6.210517543                   | 0.002931208                                     | 0.006820474                  |
| 0.676568792                         | 0.00464899                                 | 6.330049977                   | 0.004122921                                     | 0.00427593                   |
| 0.740735365                         | 0.001759266                                | 6.433798856                   | 0.001536548                                     | 0.003197873                  |
| 0.777777829                         | 0.002807237                                | 6.565585159                   | 0.002021389                                     | 0.003786017                  |
| 0.738918083                         | 0.002750128                                | 6.447078365                   | 0.002490091                                     | 0.004101963                  |
| 0.704345882                         | 0.001922319                                | 6.214775285                   | 0.001625765                                     | 0.002373336                  |
| 0.653920322                         | 0.007948439                                | 6.111640603                   | 0.006003575                                     | 0.002446345                  |
| 0.73404118                          | 0.002417265                                | 6.342576154                   | 0.002049902                                     | 0.003048634                  |
| 0.700940753                         | 0.003994397                                | 5.991971272                   | 0.003503033                                     | 0.004783025                  |
| 0.723136287                         | 0.002150123                                | 6.392789703                   | 0.001862836                                     | 0.003131541                  |
| 0.732204678                         | 0.002993062                                | 6.359942077                   | 0.002578216                                     | 0.002687676                  |
| 0.713344159                         | 0.003270794                                | 6.111036891                   | 0.002856437                                     | 0.004910059                  |
| 0.729429182                         | 0.001983091                                | 6.484252789                   | 0.001817564                                     | 0.003665752                  |
| 0.716239618                         | 0.004966382                                | 6.360231233                   | 0.00471604                                      | 0.005758953                  |
| 0.74094106                          | 0.001549077                                | 6.37798913                    | 0.00134945                                      | 0.002968117                  |
| 0.734450235                         | 0.002412476                                | 6.503878341                   | 0.002078434                                     | 0.001430756                  |
| 0.698931749                         | 0.001929053                                | 6.428515121                   | 0.001579088                                     | 0.002267981                  |
| 0.690585824                         | 0.002073609                                | 6.468852162                   | 0.001647036                                     | 0.001732196                  |
| 0.746208717                         | 0.001564809                                | 6.470927342                   | 0.001352187                                     | 0.002137349                  |
| 0.724348942                         | 0.002163198                                | 6.551568525                   | 0.001882047                                     | 0.002667671                  |
| 0.729132608                         | 0.00304614                                 | 6.396483112                   | 0.002812974                                     | 0.006697098                  |
| 0.689127205                         | 0.010051288                                | 5.932020968                   | 0.008407704                                     | 0.008650607                  |
| 0.717352854                         | 0.001006913                                | 6.702544972                   | 0.000840409                                     | 0.001400868                  |



| wavelet.LHH_gldm_GrayLevelNonUniformityNormalized | wavelet.LHH_gldm_DependenceEntropy | wavelet.LHH_gldm_DependenceNonUniformity | wavelet.LHH_gldm_GrayLevelNonUniformity |
|---------------------------------------------------|------------------------------------|------------------------------------------|-----------------------------------------|
| 0.042521193                                       | 6.638099534                        | 648.6220547                              | 90.22997172                             |
| 0.058866996                                       | 6.302485005                        | 246.3497326                              | 55.04064171                             |
| 0.04359082                                        | 6.859124183                        | 404.5488918                              | 66.86831812                             |
| 0.098133215                                       | 5.951992138                        | 183.1269191                              | 95.87615148                             |
| 0.051619425                                       | 6.637451924                        | 646.2119932                              | 122.2347973                             |
| 0.031822773                                       | 6.453866453                        | 278.0939394                              | 21.0030303                              |
| 0.044239801                                       | 6.980581312                        | 1417.106176                              | 249.9991152                             |
| 0.104132262                                       | 6.148375675                        | 840.4146437                              | 531.9075959                             |
| 0.075365686                                       | 6.33786223                         | 983.5283766                              | 342.6124065                             |
| 0.092329862                                       | 5.926367738                        | 212.3451493                              | 98.97761194                             |
| 0.07814116                                        | 6.542954003                        | 277.4416446                              | 117.83687                               |
| 0.076524579                                       | 6.274636526                        | 490.8672451                              | 176.389154                              |
| 0.129109338                                       | 6.051340706                        | 252.7311194                              | 241.0471344                             |
| 0.062846474                                       | 6.560114513                        | 398.4105999                              | 107.9073966                             |
| 0.092666737                                       | 6.105368964                        | 377.7217742                              | 183.8508065                             |
| 0.053709322                                       | 6.976606022                        | 934.5813528                              | 235.0319927                             |
| 0.042090688                                       | 6.575373905                        | 361.2881072                              | 50.25628141                             |
| 0.112971284                                       | 5.995541587                        | 192.378751                               | 139.2935929                             |
| 0.079555842                                       | 6.045426607                        | 302.0292758                              | 103.2634823                             |
| 0.082714466                                       | 6.208250155                        | 1069.291595                              | 430.0325063                             |
| 0.10061046                                        | 6.370516392                        | 468.5218254                              | 304.2460317                             |
| 0.080848381                                       | 6.007457188                        | 238.4439296                              | 87.23540315                             |
| 0.061201096                                       | 6.117608572                        | 279.0878906                              | 62.66992188                             |
| 0.051315979                                       | 6.624491638                        | 700.874575                               | 135.8333963                             |
| 0.105221813                                       | 5.859683389                        | 233.2403771                              | 133.9473684                             |
| 0.047792464                                       | 6.704568225                        | 687.4187421                              | 113.2203461                             |
| 0.038795808                                       | 6.939192943                        | 940.2533251                              | 125.4268481                             |
| 0.096958254                                       | 6.153682029                        | 477.3120927                              | 267.7986966                             |
| 0.051624301                                       | 6.041581002                        | 148.852349                               | 23.07606264                             |
| 0.04793601                                        | 6.658823474                        | 588.9269718                              | 98.46056475                             |
| 0.090526325                                       | 6.401876652                        | 836.3261875                              | 430.7242539                             |
| 0.041085452                                       | 6.878191581                        | 559.2387627                              | 85.0057999                              |
| 0.038106675                                       | 7.008413272                        | 907.1666151                              | 123.046454                              |
| 0.041742327                                       | 6.751970385                        | 701.5012766                              | 98.09446809                             |
| 0.054273796                                       | 6.516020885                        | 1236.166213                              | 239.0217984                             |
| 0.118503767                                       | 5.961353959                        | 468.0283428                              | 355.3927976                             |
| 0.095387416                                       | 6.26091722                         | 617.4251545                              | 354.9365762                             |
| 0.052767952                                       | 7.071945101                        | 1057.966092                              | 272.3354001                             |
| 0.053083482                                       | 6.374565017                        | 338.6666667                              | 65.29268293                             |
| 0.048687054                                       | 6.976757634                        | 1757.936176                              | 353.9548831                             |
| 0.080073285                                       | 6.339221621                        | 520.3885891                              | 207.7101002                             |
| 0.077299387                                       | 6.094400167                        | 915.5709853                              | 298.9167313                             |
| 0.089276265                                       | 6.167781917                        | 696.9228032                              | 326.1261976                             |
| 0.03415494                                        | 6.889255018                        | 806.585209                               | 84.97749196                             |
| 0.045280551                                       | 6.62094761                         | 359.1486698                              | 57.8685446                              |
| 0.068388492                                       | 6.67660911                         | 534.3326047                              | 187.7264117                             |
| 0.055412101                                       | 6.679544365                        | 1155.113985                              | 252.7900044                             |
| 0.106317744                                       | 5.872773405                        | 156.5889782                              | 92.60275545                             |
| 0.078034965                                       | 5.983447685                        | 196.5558167                              | 66.40775558                             |
| 0.113067207                                       | 5.963441383                        | 220.1449704                              | 152.8668639                             |
| 0.045913632                                       | 6.792913949                        | 660.8411833                              | 117.9521214                             |
| 0.047453189                                       | 6.48013798                         | 1029.252744                              | 159.9646989                             |
| 0.090484968                                       | 6.084359358                        | 891.2030142                              | 408.2681738                             |
| 0.058571597                                       | 6.319953731                        | 294.8913043                              | 64.66304348                             |
| 0.080324495                                       | 6.148262437                        | 280.5984962                              | 106.8315789                             |
| 0.055983695                                       | 6.467350015                        | 494.9025641                              | 109.1682051                             |
| 0.047827515                                       | 6.801804205                        | 1046.122868                              | 193.4622991                             |
| 0.039547695                                       | 6.922474995                        | 953.4719491                              | 136.7559283                             |
| 0.058373934                                       | 6.40892192                         | 426.7269417                              | 96.20024272                             |
| 0.057691258                                       | 6.707958579                        | 2238.020922                              | 526.66349                               |
| 0.03202559                                        | 6.837060215                        | 613.0385051                              | 56.55719139                             |
| 0.090293594                                       | 6.080254632                        | 519.9026217                              | 241.0838951                             |
| 0.060044035                                       | 6.714231499                        | 1278.506651                              | 347.5949214                             |
| 0.037465603                                       | 6.928724561                        | 2328.689361                              | 285.6002886                             |
| 0.134090691                                       | 5.603850881                        | 125.3063291                              | 105.9316456                             |
| 0.058434558                                       | 6.610205177                        | 929.3397204                              | 225.674262                              |
| 0.047801244                                       | 6.524355883                        | 355.5705521                              | 62.33282209                             |
| 0.036715213                                       | 6.947312665                        | 1946.45056                               | 229.477008                              |
| 0.059739278                                       | 6.488100581                        | 1568.697456                              | 349.8929486                             |
| 0.053206062                                       | 6.553950577                        | 750.647343                               | 154.1911663                             |
| 0.07786489                                        | 6.213761135                        | 277.0292533                              | 101.0446497                             |
| 0.053556544                                       | 6.599487945                        | 1125.839161                              | 229.7575758                             |
| 0.105676512                                       | 6.091081821                        | 376.0987275                              | 240.8367705                             |
| 0.040215901                                       | 6.630124751                        | 716.6219566                              | 90.84772023                             |
| 0.056343357                                       | 6.844132938                        | 697.2842542                              | 176.4110508                             |
| 0.046322969                                       | 6.699003761                        | 368.9910581                              | 62.16542474                             |
| 0.031427588                                       | 7.02283779                         | 813.3464107                              | 75.30050083                             |
| 0.105824591                                       | 5.933344932                        | 167.9164927                              | 101.3799582                             |
| 0.066038769                                       | 6.291828231                        | 421.9384886                              | 112.7281781                             |
| 0.045665986                                       | 6.645558994                        | 655.3998929                              | 106.8127405                             |
| 0.041930214                                       | 6.624646525                        | 627.2614379                              | 83.39919558                             |
| 0.093108672                                       | 6.286875625                        | 312.4185659                              | 167.5025014                             |
| 0.089942591                                       | 6.320308452                        | 589.8039156                              | 294.022331                              |
| 0.08352277                                        | 6.342923437                        | 561.5265213                              | 256.6654735                             |
| 0.039592208                                       | 6.91793679                         | 653.2082821                              | 96.56539565                             |
| 0.230258404                                       | 5.573595797                        | 137.0221932                              | 352.7558747                             |
| 0.044746648                                       | 6.774865965                        | 641.7807128                              | 106.7207547                             |
| 0.074235718                                       | 6.439962123                        | 568.5164114                              | 203.5543399                             |
| 0.065361014                                       | 6.347105939                        | 363.7404372                              | 95.68852459                             |
| 0.132317635                                       | 5.818128566                        | 292.1130864                              | 267.9432099                             |
| 0.107825379                                       | 6.189355951                        | 196.0015337                              | 140.6042945                             |
| 0.049191001                                       | 6.665188909                        | 662.209068                               | 117.1729639                             |
| 0.055049402                                       | 6.65294722                         | 1271.459194                              | 285.3210496                             |
| 0.065970248                                       | 6.569380485                        | 698.84                                   | 217.7018182                             |
| 0.047981764                                       | 6.643182562                        | 1226.482537                              | 208.816636                              |
| 0.045296857                                       | 6.777719669                        | 971.0549386                              | 155.0058445                             |
| 0.092431229                                       | 6.086209901                        | 535.514732                               | 260.3787717                             |
| 0.079016866                                       | 6.159652515                        | 217.1318052                              | 82.73065903                             |
| 0.139465406                                       | 5.682267228                        | 120.6306954                              | 116.3141487                             |
| 0.044740592                                       | 7.076465859                        | 1435.307586                              | 258.3321787                             |

| wavelet.LHH_gldm_SmallDependenceEmphasis | wavelet.LHH_gldm_DependenceNonUniformityNormalized | wavelet.LHH_gldm_DependenceVariance | wavelet.LHH_gldm_LargeDependenceEmphasis |
|------------------------------------------|----------------------------------------------------|-------------------------------------|------------------------------------------|
| 0.516903918                              | 0.305665436                                        | 1.207337342                         | 5.192271442                              |
| 0.465588434                              | 0.26347565                                         | 1.708775201                         | 6.700534759                              |
| 0.480676117                              | 0.263721572                                        | 1.99265837                          | 7.097783572                              |
| 0.331413781                              | 0.187437993                                        | 2.777981601                         | 11.31729785                              |
| 0.486344974                              | 0.272893578                                        | 1.716848949                         | 6.498310811                              |
| 0.660142874                              | 0.421354454                                        | 0.847373737                         | 3.515151515                              |
| 0.451341442                              | 0.250770868                                        | 2.285742057                         | 7.857547337                              |
| 0.310849318                              | 0.1645291                                          | 4.643017632                         | 15.47527435                              |
| 0.405015061                              | 0.216350281                                        | 3.645372357                         | 10.84513858                              |
| 0.356963246                              | 0.198083162                                        | 2.580265649                         | 10.30783582                              |
| 0.349453081                              | 0.18397987                                         | 3.787791373                         | 12.77188329                              |
| 0.382302862                              | 0.21295759                                         | 2.867399269                         | 10.01171367                              |
| 0.264669139                              | 0.135367498                                        | 6.207293881                         | 20.97643278                              |
| 0.442031033                              | 0.232038789                                        | 2.774053972                         | 9.078043098                              |
| 0.372641865                              | 0.190383959                                        | 3.609972522                         | 12.05040323                              |
| 0.395647555                              | 0.213569779                                        | 3.024265438                         | 10.15082267                              |
| 0.521784945                              | 0.302586354                                        | 1.346329638                         | 5.427135678                              |
| 0.282013621                              | 0.15602494                                         | 4.764350725                         | 16.62854826                              |
| 0.402525189                              | 0.232688194                                        | 2.559136849                         | 8.929121726                              |
| 0.368213713                              | 0.205672551                                        | 2.645578453                         | 10.02904405                              |
| 0.299198977                              | 0.154934466                                        | 5.885581573                         | 18.14021164                              |
| 0.374257794                              | 0.220986033                                        | 1.923794129                         | 8.481000927                              |
| 0.459482787                              | 0.272546768                                        | 1.455287933                         | 6.21484375                               |
| 0.45984355                               | 0.264780723                                        | 1.735408098                         | 6.749149981                              |
| 0.313912909                              | 0.183221035                                        | 3.091787929                         | 12.15789474                              |
| 0.521663074                              | 0.290172538                                        | 2.34098701                          | 7.043056142                              |
| 0.506195293                              | 0.29082998                                         | 1.890879787                         | 6.423445716                              |
| 0.324255169                              | 0.172813937                                        | 3.665794865                         | 13.3743664                               |
| 0.542429779                              | 0.333003018                                        | 1.121340881                         | 4.762863535                              |
| 0.512729918                              | 0.286721992                                        | 1.89395475                          | 6.499513145                              |
| 0.353954094                              | 0.175772633                                        | 5.083263232                         | 15.10970996                              |
| 0.460783506                              | 0.27029423                                         | 1.940847901                         | 6.959400677                              |
| 0.491133076                              | 0.280943517                                        | 1.84004283                          | 6.500774234                              |
| 0.51504507                               | 0.298511182                                        | 1.422568764                         | 5.608510638                              |
| 0.499225324                              | 0.280691692                                        | 1.940228766                         | 6.666212534                              |
| 0.269579739                              | 0.156061468                                        | 4.475457363                         | 16.47582528                              |
| 0.315579422                              | 0.165929899                                        | 4.365364733                         | 14.90647675                              |
| 0.385167745                              | 0.204992461                                        | 3.703382962                         | 11.48944003                              |
| 0.474356264                              | 0.275338753                                        | 1.516650142                         | 6.193495935                              |
| 0.433981274                              | 0.241806902                                        | 2.531055363                         | 8.470701513                              |
| 0.378309176                              | 0.200612409                                        | 3.71241445                          | 11.71472629                              |
| 0.403603798                              | 0.236765189                                        | 1.979646093                         | 7.960434445                              |
| 0.344058014                              | 0.190780948                                        | 3.260773557                         | 11.70462633                              |
| 0.547838141                              | 0.324190197                                        | 1.135427544                         | 4.811093248                              |
| 0.493797455                              | 0.281023998                                        | 1.792484344                         | 6.463223787                              |
| 0.356549544                              | 0.194656687                                        | 3.00212355                          | 11.06193078                              |
| 0.464116286                              | 0.253203416                                        | 2.209740761                         | 7.669881631                              |
| 0.301291222                              | 0.179780687                                        | 3.050117249                         | 12.42594719                              |
| 0.393573149                              | 0.230970407                                        | 2.123087375                         | 8.381903643                              |
| 0.29303742                               | 0.16282912                                         | 4.949791674                         | 16.32544379                              |
| 0.452031123                              | 0.257236739                                        | 1.797401451                         | 7.002335539                              |
| 0.521795304                              | 0.305325643                                        | 1.28002847                          | 5.290714921                              |
| 0.344403012                              | 0.197518399                                        | 2.727005173                         | 10.66710993                              |
| 0.470758519                              | 0.267111689                                        | 1.676351476                         | 6.585144928                              |
| 0.375157918                              | 0.210976313                                        | 2.723588671                         | 9.960902256                              |
| 0.449619831                              | 0.253796187                                        | 1.932912558                         | 7.282051282                              |
| 0.460129428                              | 0.258621228                                        | 1.912553244                         | 7.118170581                              |
| 0.480400012                              | 0.275729309                                        | 1.599398684                         | 6.290919607                              |
| 0.464952864                              | 0.258936251                                        | 1.78744315                          | 6.910194175                              |
| 0.460970385                              | 0.245155102                                        | 3.59291988                          | 9.879395334                              |
| 0.578251689                              | 0.347133921                                        | 1.106945205                         | 4.506228766                              |
| 0.345520825                              | 0.194720083                                        | 3.020618048                         | 11.19550562                              |
| 0.409334098                              | 0.220851037                                        | 2.429461454                         | 8.969942995                              |
| 0.51916812                               | 0.30548201                                         | 1.257376076                         | 5.264200446                              |
| 0.267621495                              | 0.158615606                                        | 3.823739785                         | 15.43544304                              |
| 0.45527186                               | 0.240636903                                        | 2.876913538                         | 8.950802693                              |
| 0.470309479                              | 0.272676804                                        | 1.460800181                         | 6.164110429                              |
| 0.527287247                              | 0.31143209                                         | 1.334227866                         | 5.28192                                  |
| 0.48795538                               | 0.267832927                                        | 2.143855626                         | 7.206931876                              |
| 0.449245479                              | 0.259022548                                        | 1.705016334                         | 6.850931677                              |
| 0.387763314                              | 0.213263474                                        | 2.898848584                         | 10.0469992                               |
| 0.473220782                              | 0.262433371                                        | 2.150562972                         | 7.371095571                              |
| 0.312061119                              | 0.165027963                                        | 4.46226367                          | 15.15708644                              |
| 0.52360816                               | 0.317229728                                        | 1.035169146                         | 4.792828685                              |
| 0.415881207                              | 0.222703371                                        | 3.123443755                         | 9.930693069                              |
| 0.492868668                              | 0.274956079                                        | 1.844385562                         | 6.643815201                              |
| 0.564913876                              | 0.339460105                                        | 1.063806957                         | 4.522537563                              |
| 0.320719472                              | 0.175278176                                        | 4.568481658                         | 14.61169102                              |
| 0.429341351                              | 0.247181306                                        | 2.154733481                         | 7.842413591                              |
| 0.485319649                              | 0.280188107                                        | 1.450305716                         | 5.981616075                              |
| 0.532995346                              | 0.315365228                                        | 1.202381323                         | 5.037204625                              |
| 0.361773044                              | 0.173662349                                        | 4.922286824                         | 15                                       |
| 0.356374733                              | 0.180423345                                        | 4.506521163                         | 13.93361884                              |
| 0.350499148                              | 0.182729099                                        | 3.903453115                         | 12.9934917                               |
| 0.461040312                              | 0.267818074                                        | 1.599594266                         | 6.492414924                              |
| 0.127259918                              | 0.089440074                                        | 10.55281753                         | 44.0136031                               |
| 0.472645321                              | 0.269090446                                        | 1.688508454                         | 6.558071279                              |
| 0.40665706                               | 0.207336401                                        | 3.546817185                         | 11.10430343                              |
| 0.462112894                              | 0.248456583                                        | 2.564274837                         | 8.371584699                              |
| 0.259338617                              | 0.144253376                                        | 5.050519372                         | 18.52395062                              |
| 0.297402069                              | 0.150307925                                        | 5.336661146                         | 17.78067485                              |
| 0.494460187                              | 0.278005486                                        | 1.895022915                         | 6.631402183                              |
| 0.442876689                              | 0.245313369                                        | 2.159649776                         | 7.8253907                                |
| 0.382395742                              | 0.211769697                                        | 2.707877319                         | 9.825454545                              |
| 0.482904437                              | 0.281820436                                        | 1.450596582                         | 5.970128676                              |
| 0.495104665                              | 0.283768246                                        | 1.851194236                         | 6.507305669                              |
| 0.346923186                              | 0.190101076                                        | 2.996518803                         | 11.32374867                              |
| 0.389779106                              | 0.207384723                                        | 3.29631667                          | 10.78414518                              |
| 0.221664942                              | 0.144641122                                        | 4.614765741                         | 18.8441247                               |
| 0.456676417                              | 0.248581154                                        | 2.498769432                         | 8.204364392                              |



| wavelet.LHH_gldm_LargeDependenceLowGrayLevelEmphasis | wavelet.LHH_gldm_SmallDependenceHighGrayLevelEmphasis | wavelet.LHH_gldm_LargeDependenceHighGrayLevelEmphasis |
|------------------------------------------------------|-------------------------------------------------------|-------------------------------------------------------|
| 0.005452275                                          | 645.3269543                                           | 6158.378888                                           |
| 0.005204578                                          | 812.8394875                                           | 11381.84706                                           |
| 0.008754897                                          | 534.595468                                            | 7290.895698                                           |
| 0.071077559                                          | 67.22816026                                           | 2083.614125                                           |
| 0.004901831                                          | 819.7190906                                           | 10093.3315                                            |
| 0.0058123                                            | 756.8895874                                           | 3713.043939                                           |
| 0.003596945                                          | 1131.483431                                           | 19037.09786                                           |
| 0.029031144                                          | 175.7561977                                           | 8547.936374                                           |
| 0.014019934                                          | 352.5517666                                           | 8801.354597                                           |
| 0.098690625                                          | 53.96128998                                           | 1343.574627                                           |
| 0.020130942                                          | 290.0085131                                           | 9954.523873                                           |
| 0.017747932                                          | 240.8046693                                           | 6103.748807                                           |
| 0.079667884                                          | 79.39738587                                           | 5780.551152                                           |
| 0.008148547                                          | 674.6178684                                           | 13070.3343                                            |
| 0.025399838                                          | 204.8681743                                           | 6138.96371                                            |
| 0.008063216                                          | 635.6266127                                           | 15655.45955                                           |
| 0.011563038                                          | 357.003133                                            | 3557.645729                                           |
| 0.065050591                                          | 80.35287034                                           | 4574.600162                                           |
| 0.029053008                                          | 151.4307628                                           | 3074.363636                                           |
| 0.025418985                                          | 170.2994652                                           | 4243.025197                                           |
| 0.064153327                                          | 100.0922428                                           | 5508.136905                                           |
| 0.07157839                                           | 66.26872795                                           | 1383.731233                                           |
| 0.033186693                                          | 158.806103                                            | 1941.736328                                           |
| 0.011923659                                          | 345.1849823                                           | 4594.983377                                           |
| 0.062638545                                          | 71.29562                                              | 2587.947368                                           |
| 0.006321381                                          | 725.3229845                                           | 9149.110173                                           |
| 0.003742759                                          | 1182.485471                                           | 14810.63594                                           |
| 0.037244384                                          | 133.4519298                                           | 5093.410572                                           |
| 0.022646218                                          | 214.0306966                                           | 1780.261745                                           |
| 0.01295458                                           | 399.9719627                                           | 4606.884129                                           |
| 0.014808619                                          | 404.7657137                                           | 15966.37411                                           |
| 0.008566134                                          | 498.3129343                                           | 6971.314161                                           |
| 0.002431062                                          | 1633.895012                                           | 21078.41902                                           |
| 0.003808131                                          | 965.9348821                                           | 10263.1783                                            |
| 0.007073801                                          | 559.9469014                                           | 7054.747956                                           |
| 0.03318694                                           | 140.1056292                                           | 8422.535845                                           |
| 0.040789211                                          | 130.8050437                                           | 5736.402042                                           |
| 0.005990038                                          | 822.4401619                                           | 24386.41445                                           |
| 0.011861201                                          | 329.8183784                                           | 3977.697561                                           |
| 0.004854645                                          | 884.1637514                                           | 16520.63122                                           |
| 0.035330271                                          | 163.3527068                                           | 4416.870085                                           |
| 0.031029057                                          | 134.2638083                                           | 2471.821826                                           |
| 0.03254472                                           | 142.6114422                                           | 4510.923077                                           |
| 0.003532208                                          | 969.7603127                                           | 8603.762862                                           |
| 0.016170531                                          | 305.2485815                                           | 3543.732394                                           |
| 0.007137161                                          | 655.6280468                                           | 19408.39927                                           |
| 0.005210782                                          | 819.7789512                                           | 12677.14533                                           |
| 0.035232178                                          | 128.6641986                                           | 4707.972445                                           |
| 0.036356191                                          | 122.3273746                                           | 2295.905993                                           |
| 0.098208779                                          | 58.04814168                                           | 2938.047337                                           |
| 0.006200958                                          | 626.7492618                                           | 9317.575321                                           |
| 0.008544439                                          | 423.1323886                                           | 3943.252447                                           |
| 0.049388005                                          | 92.40203321                                           | 2556.27039                                            |
| 0.00860817                                           | 478.5943584                                           | 6087.617754                                           |
| 0.027427588                                          | 178.3209853                                           | 4191.385714                                           |
| 0.012502644                                          | 324.5217661                                           | 4960.861538                                           |
| 0.00396741                                           | 974.8710029                                           | 14474.92311                                           |
| 0.002932058                                          | 1250.12518                                            | 15997.62724                                           |
| 0.008353589                                          | 468.3607075                                           | 6622.254854                                           |
| 0.007777016                                          | 652.241369                                            | 13291.1676                                            |
| 0.005543758                                          | 736.9716735                                           | 5800.094564                                           |
| 0.050516944                                          | 93.45395892                                           | 2732.856929                                           |
| 0.00418088                                           | 995.4534192                                           | 20988.75453                                           |
| 0.002916792                                          | 1128.397402                                           | 11243.43198                                           |
| 0.152739157                                          | 34.34364371                                           | 1698.474684                                           |
| 0.011244794                                          | 441.4161645                                           | 7847.161833                                           |
| 0.011715013                                          | 367.8000194                                           | 4333.548313                                           |
| 0.002521367                                          | 1328.394247                                           | 13149.5088                                            |
| 0.006971382                                          | 580.4165987                                           | 8179.332423                                           |
| 0.016951796                                          | 244.8864872                                           | 3480.509662                                           |
| 0.018149574                                          | 256.7372759                                           | 6068.568899                                           |
| 0.014520466                                          | 311.951952                                            | 4377.754779                                           |
| 0.034099032                                          | 155.1141681                                           | 7064.209302                                           |
| 0.003323752                                          | 1036.197424                                           | 8757.589199                                           |
| 0.009800561                                          | 553.6141011                                           | 12153.96646                                           |
| 0.005011578                                          | 832.6645525                                           | 11057.21386                                           |
| 0.005902462                                          | 892.0686099                                           | 6569.366027                                           |
| 0.065378647                                          | 84.74477985                                           | 3486.149269                                           |
| 0.018926016                                          | 232.3907295                                           | 3942.859402                                           |
| 0.003716293                                          | 967.1769936                                           | 11520.81744                                           |
| 0.005544144                                          | 661.6175456                                           | 5911.83811                                            |
| 0.021033196                                          | 292.5920544                                           | 11348.75097                                           |
| 0.012214108                                          | 443.213474                                            | 16591.21872                                           |
| 0.03722544                                           | 152.2051625                                           | 4870.157826                                           |
| 0.009879074                                          | 752.6911375                                           | 9835.850349                                           |
| 0.808868856                                          | 7.785710653                                           | 2516.788512                                           |
| 0.003879055                                          | 971.2120243                                           | 13208.7044                                            |
| 0.021835271                                          | 256.5178599                                           | 6160.374544                                           |
| 0.020725564                                          | 316.9841693                                           | 5079.784836                                           |
| 0.123487305                                          | 43.92921721                                           | 2933.373827                                           |
| 0.06216917                                           | 101.9502087                                           | 5555.944018                                           |
| 0.004109985                                          | 964.4672507                                           | 12588.01847                                           |
| 0.008540255                                          | 469.0663858                                           | 7903.430639                                           |
| 0.00669299                                           | 626.7267738                                           | 15576.62848                                           |
| 0.003844857                                          | 889.7864499                                           | 10514.23047                                           |
| 0.011628394                                          | 510.9836799                                           | 6236.140853                                           |
| 0.035433522                                          | 135.3210575                                           | 3884.918353                                           |
| 0.033051322                                          | 168.0278843                                           | 4075.73639                                            |
| 0.107534715                                          | 43.88039267                                           | 3464.619904                                           |
| 0.004954717                                          | 894.5619194                                           | 15388.33911                                           |

| wavelet.LHH_gldm_SmallDependenceLowGrayLevelEmphasis | wavelet.LHH_gldm_LowGrayLevelEmphasis | wavelet.LHH_gldm_DistanceZoneVariabilityNormalized | wavelet.LHH_gldm_LowIntensityEmphasis |
|------------------------------------------------------|---------------------------------------|----------------------------------------------------|---------------------------------------|
| 0.001105023                                          | 0.001570643                           | 0.996862753                                        | 0.001983081                           |
| 0.001426782                                          | 0.001754833                           | 1                                                  | 0.002710989                           |
| 0.00155283                                           | 0.002146782                           | 1                                                  | 0.002983625                           |
| 0.004419835                                          | 0.008770391                           | 1                                                  | 0.012885215                           |
| 0.00079317                                           | 0.001155032                           | 1                                                  | 0.001517535                           |
| 0.002617913                                          | 0.003007657                           | 1                                                  | 0.003675767                           |
| 0.000402505                                          | 0.000642196                           | 0.993243321                                        | 0.000832406                           |
| 0.000952709                                          | 0.002282551                           | 0.995394383                                        | 0.00301012                            |
| 0.000811126                                          | 0.001583813                           | 0.999051234                                        | 0.001924859                           |
| 0.005860811                                          | 0.012885103                           | 1                                                  | 0.016619656                           |
| 0.002723587                                          | 0.003747721                           | 1                                                  | 0.007020941                           |
| 0.001272446                                          | 0.002376839                           | 0.998025668                                        | 0.003157476                           |
| 0.001926173                                          | 0.004850063                           | 1                                                  | 0.00733637                            |
| 0.001953499                                          | 0.002369516                           | 1                                                  | 0.004044979                           |
| 0.001440404                                          | 0.002829083                           | 1                                                  | 0.003811674                           |
| 0.000877092                                          | 0.001419597                           | 1                                                  | 0.002091915                           |
| 0.002509933                                          | 0.003464171                           | 1                                                  | 0.00445379                            |
| 0.002449627                                          | 0.00549971                            | 1                                                  | 0.008605556                           |
| 0.002535237                                          | 0.004475049                           | 1                                                  | 0.005834807                           |
| 0.001314845                                          | 0.002934804                           | 0.999068902                                        | 0.003500419                           |
| 0.002267994                                          | 0.004936535                           | 1                                                  | 0.007335725                           |
| 0.006101056                                          | 0.011904044                           | 0.995717364                                        | 0.015993202                           |
| 0.004040174                                          | 0.007733674                           | 1                                                  | 0.009202785                           |
| 0.00131194                                           | 0.002271978                           | 1                                                  | 0.002724811                           |
| 0.003673232                                          | 0.007235123                           | 1                                                  | 0.011179289                           |
| 0.001027502                                          | 0.001425724                           | 1                                                  | 0.001842769                           |
| 0.00095855                                           | 0.001205149                           | 1                                                  | 0.001708949                           |
| 0.001610132                                          | 0.003535606                           | 1                                                  | 0.004847403                           |
| 0.007705916                                          | 0.009483547                           | 1                                                  | 0.012805332                           |
| 0.002125922                                          | 0.003156203                           | 1                                                  | 0.003983152                           |
| 0.000619967                                          | 0.001256068                           | 0.998922414                                        | 0.001689999                           |
| 0.001115766                                          | 0.001766574                           | 0.998215888                                        | 0.002256778                           |
| 0.000500126                                          | 0.000663572                           | 1                                                  | 0.000918574                           |
| 0.00085004                                           | 0.001140583                           | 1                                                  | 0.001509022                           |
| 0.000911815                                          | 0.001427186                           | 0.995232447                                        | 0.001733936                           |
| 0.000940239                                          | 0.002427615                           | 1                                                  | 0.003432562                           |
| 0.001382447                                          | 0.003306276                           | 1                                                  | 0.004303697                           |
| 0.000495624                                          | 0.000815715                           | 0.988822365                                        | 0.001187431                           |
| 0.001945616                                          | 0.002909454                           | 1                                                  | 0.003810808                           |
| 0.000557957                                          | 0.000868974                           | 0.997840758                                        | 0.001180135                           |
| 0.001990179                                          | 0.004066858                           | 1                                                  | 0.005201049                           |
| 0.002383783                                          | 0.004965585                           | 0.996690577                                        | 0.005941331                           |
| 0.001557926                                          | 0.003439238                           | 1                                                  | 0.004396215                           |
| 0.000895864                                          | 0.001185183                           | 1                                                  | 0.001504512                           |
| 0.002780153                                          | 0.003931526                           | 1                                                  | 0.005186215                           |
| 0.000903914                                          | 0.001282927                           | 1                                                  | 0.002268262                           |
| 0.000629368                                          | 0.000982791                           | 1                                                  | 0.001284372                           |
| 0.002085476                                          | 0.004016738                           | 1                                                  | 0.006567407                           |
| 0.00323743                                           | 0.005912564                           | 1                                                  | 0.007861832                           |
| 0.004117527                                          | 0.008502694                           | 0.995370395                                        | 0.013637936                           |
| 0.000923398                                          | 0.00136854                            | 1                                                  | 0.001873015                           |
| 0.0012959                                            | 0.002033631                           | 0.997066021                                        | 0.00235729                            |
| 0.00228682                                           | 0.005472755                           | 0.998871332                                        | 0.006568475                           |
| 0.001577924                                          | 0.002202865                           | 1                                                  | 0.003100774                           |
| 0.002837311                                          | 0.004576918                           | 1                                                  | 0.007043982                           |
| 0.001418233                                          | 0.002344356                           | 1                                                  | 0.002978414                           |
| 0.000551486                                          | 0.00083277                            | 0.994464987                                        | 0.001106411                           |
| 0.000529108                                          | 0.000745382                           | 1                                                  | 0.001008165                           |
| 0.001271884                                          | 0.001873904                           | 1                                                  | 0.002527003                           |
| 0.000542577                                          | 0.000974585                           | 0.99543002                                         | 0.001137119                           |
| 0.001439401                                          | 0.001936569                           | 0.996598649                                        | 0.002339752                           |
| 0.002457717                                          | 0.005541582                           | 1                                                  | 0.00696487                            |
| 0.000429859                                          | 0.000692643                           | 0.985450036                                        | 0.000973271                           |
| 0.000439097                                          | 0.000702083                           | 0.980483353                                        | 0.000811715                           |
| 0.005233638                                          | 0.012662996                           | 1                                                  | 0.018870092                           |
| 0.001029407                                          | 0.001714703                           | 0.991000184                                        | 0.002158271                           |
| 0.002669216                                          | 0.003522594                           | 1                                                  | 0.005143228                           |
| 0.00047728                                           | 0.000685798                           | 0.986989889                                        | 0.000843811                           |
| 0.000801255                                          | 0.001282384                           | 1                                                  | 0.001566219                           |
| 0.001815218                                          | 0.003247666                           | 1                                                  | 0.003909334                           |
| 0.001553485                                          | 0.002634364                           | 1                                                  | 0.003723687                           |
| 0.001646619                                          | 0.002698714                           | 0.994834301                                        | 0.003331716                           |
| 0.001316814                                          | 0.002893553                           | 1                                                  | 0.004097807                           |
| 0.000782025                                          | 0.001066249                           | 0.998540147                                        | 0.00137293                            |
| 0.000997205                                          | 0.001638346                           | 0.996021236                                        | 0.00228578                            |
| 0.00113676                                           | 0.001460725                           | 1                                                  | 0.002088088                           |
| 0.001568028                                          | 0.002151292                           | 1                                                  | 0.002647528                           |
| 0.003242471                                          | 0.006259827                           | 1                                                  | 0.009482466                           |
| 0.002575807                                          | 0.003921521                           | 0.995386415                                        | 0.005491469                           |
| 0.000711037                                          | 0.000993566                           | 1                                                  | 0.001335362                           |
| 0.001294                                             | 0.001751652                           | 1                                                  | 0.002243499                           |
| 0.001274401                                          | 0.002164074                           | 1                                                  | 0.003366702                           |
| 0.000642242                                          | 0.001199612                           | 0.998462722                                        | 0.001710573                           |
| 0.001508029                                          | 0.003445893                           | 1                                                  | 0.004223507                           |
| 0.000883004                                          | 0.002205004                           | 0.995492134                                        | 0.002305003                           |
| 0.004161354                                          | 0.02176106                            | 1                                                  | 0.034565041                           |
| 0.000691752                                          | 0.00097363                            | 0.99848255                                         | 0.00133243                            |
| 0.00138732                                           | 0.002587549                           | 1                                                  | 0.00328796                            |
| 0.001640091                                          | 0.003680276                           | 1                                                  | 0.004045713                           |
| 0.003248791                                          | 0.008342724                           | 1                                                  | 0.012460796                           |
| 0.00255121                                           | 0.00525906                            | 0.995157414                                        | 0.008644238                           |
| 0.000748728                                          | 0.001033078                           | 0.998525075                                        | 0.001392457                           |
| 0.000805995                                          | 0.001412687                           | 0.986572788                                        | 0.001730064                           |
| 0.000594159                                          | 0.000994764                           | 1                                                  | 0.001431508                           |
| 0.000547245                                          | 0.000865297                           | 0.997552023                                        | 0.001063219                           |
| 0.001849881                                          | 0.002984269                           | 0.996929383                                        | 0.003714786                           |
| 0.00159785                                           | 0.003677279                           | 1                                                  | 0.004506427                           |
| 0.003667365                                          | 0.005475903                           | 1                                                  | 0.008752827                           |
| 0.002684218                                          | 0.007156521                           | 1                                                  | 0.011968772                           |
| 0.000550321                                          | 0.000872082                           | 0.996055242                                        | 0.001127683                           |

| wavelet.LHH_gldzm_LargeDistanceEmphasis | wavelet.LHH_gldzm_HighIntensitySmallDistanceEmphasis | wavelet.LHH_gldzm_LowIntensityLargeDistanceEmphasis | wavelet.LHH_gldzm_HighIntensityEmphasis |
|-----------------------------------------|------------------------------------------------------|-----------------------------------------------------|-----------------------------------------|
| 1.004713276                             | 1241.02553                                           | 0.001988766                                         | 1242.02121                              |
| 1                                       | 1741.882122                                          | 0.002710989                                         | 1741.882122                             |
| 1                                       | 1109.503555                                          | 0.002983625                                         | 1109.503555                             |
| 1                                       | 202.9556787                                          | 0.012885215                                         | 202.9556787                             |
| 1                                       | 1670.715367                                          | 0.001517535                                         | 1670.715367                             |
| 1                                       | 1142.253086                                          | 0.003675767                                         | 1142.253086                             |
| 1.010169492                             | 2494.521525                                          | 0.000838648                                         | 2499.591525                             |
| 1.006924409                             | 562.1658973                                          | 0.003018684                                         | 563.5741489                             |
| 1.001423825                             | 862.9740152                                          | 0.001925899                                         | 863.4613194                             |
| 1                                       | 150.0461894                                          | 0.016619656                                         | 150.0461894                             |
| 1                                       | 827.4022989                                          | 0.007020941                                         | 827.4022989                             |
| 1.002964427                             | 627.1422925                                          | 0.003164888                                         | 627.4387352                             |
| 1                                       | 299.2544031                                          | 0.00733637                                          | 299.2544031                             |
| 1                                       | 1514.826651                                          | 0.004044979                                         | 1514.826651                             |
| 1                                       | 544.8762376                                          | 0.003811674                                         | 544.8762376                             |
| 1                                       | 1599.067227                                          | 0.002091915                                         | 1599.067227                             |
| 1                                       | 681.8476454                                          | 0.00445379                                          | 681.8476454                             |
| 1                                       | 281.2744063                                          | 0.008605556                                         | 281.2744063                             |
| 1                                       | 373.1744                                             | 0.005834807                                         | 373.1744                                |
| 1.001397299                             | 460.1710526                                          | 0.003506629                                         | 460.2496507                             |
| 1                                       | 332.5172754                                          | 0.007335725                                         | 332.5172754                             |
| 1.006437768                             | 174.8969957                                          | 0.016037908                                         | 175.1287554                             |
| 1                                       | 340.4595588                                          | 0.009202785                                         | 340.4595588                             |
| 1                                       | 742.869993                                           | 0.002724811                                         | 742.869993                              |
| 1                                       | 227.1218962                                          | 0.011179289                                         | 227.1218962                             |
| 1                                       | 1386.497854                                          | 0.001842769                                         | 1386.497854                             |
| 1                                       | 2334.507644                                          | 0.001708949                                         | 2334.507644                             |
| 1                                       | 408.5928934                                          | 0.004847403                                         | 408.5928934                             |
| 1                                       | 393.3498233                                          | 0.012805332                                         | 393.3498233                             |
| 1                                       | 776.2479132                                          | 0.003983152                                         | 776.2479132                             |
| 1.001617251                             | 1136.034097                                          | 0.001691922                                         | 1136.374124                             |
| 1.002678571                             | 1074.4125                                            | 0.002260195                                         | 1074.9375                               |
| 1                                       | 3327.230022                                          | 0.000918574                                         | 3327.230022                             |
| 1                                       | 1868.512821                                          | 0.001509022                                         | 1868.512821                             |
| 1.007168459                             | 1115.325667                                          | 0.001742421                                         | 1117.127041                             |
| 1                                       | 517.4965116                                          | 0.003432562                                         | 517.4965116                             |
| 1                                       | 414.3614364                                          | 0.004303697                                         | 414.3614364                             |
| 1.016861219                             | 2126.726113                                          | 0.001198285                                         | 2138.062689                             |
| 1                                       | 689.9676946                                          | 0.003810808                                         | 689.9676946                             |
| 1.003242367                             | 2025.548365                                          | 0.001182096                                         | 2027.009457                             |
| 1                                       | 427.6292639                                          | 0.005201049                                         | 427.6292639                             |
| 1.004972376                             | 331.0393646                                          | 0.005950722                                         | 331.7491713                             |
| 1                                       | 409.8294899                                          | 0.004396215                                         | 409.8294899                             |
| 1                                       | 1769.691381                                          | 0.001504512                                         | 1769.691381                             |
| 1                                       | 612.3064295                                          | 0.005186215                                         | 612.3064295                             |
| 1                                       | 1832.728873                                          | 0.002268262                                         | 1832.728873                             |
| 1                                       | 1756.201923                                          | 0.001284372                                         | 1756.201923                             |
| 1                                       | 427.9721254                                          | 0.006567407                                         | 427.9721254                             |
| 1                                       | 309.2864583                                          | 0.007861832                                         | 309.2864583                             |
| 1.006960557                             | 198.7146172                                          | 0.013707542                                         | 198.8886311                             |
| 1                                       | 1385.488166                                          | 0.001873015                                         | 1385.488166                             |
| 1.004407444                             | 806.0974535                                          | 0.002376164                                         | 806.6762977                             |
| 1.001693958                             | 265.8284867                                          | 0.006582475                                         | 265.879729                              |
| 1                                       | 1007.057432                                          | 0.003100774                                         | 1007.057432                             |
| 1                                       | 469.7382199                                          | 0.007043982                                         | 469.7382199                             |
| 1                                       | 715.3484252                                          | 0.002978414                                         | 715.3484252                             |
| 1.008325624                             | 2104.30377                                           | 0.001109379                                         | 2110.407493                             |
| 1                                       | 2602.703166                                          | 0.001008165                                         | 2602.703166                             |
| 1                                       | 1004.068927                                          | 0.002527003                                         | 1004.068927                             |
| 1.006870706                             | 1405.888143                                          | 0.001145                                            | 1408.035395                             |
| 1.005110733                             | 1276.348595                                          | 0.002342788                                         | 1278.710392                             |
| 1                                       | 269.7305101                                          | 0.00696487                                          | 269.7305101                             |
| 1.021986075                             | 2411.551392                                          | 0.001012234                                         | 2425.50568                              |
| 1.02956636                              | 2152.310009                                          | 0.00082684                                          | 2169.535699                             |
| 1                                       | 129.1637931                                          | 0.018870092                                         | 129.1637931                             |
| 1.013561025                             | 958.5452034                                          | 0.002184258                                         | 962.0537418                             |
| 1                                       | 779.4738331                                          | 0.005143228                                         | 779.4738331                             |
| 1.019643793                             | 2500.608303                                          | 0.000857342                                         | 2511.653222                             |
| 1                                       | 1185.812983                                          | 0.001566219                                         | 1185.812983                             |
| 1                                       | 537.2593565                                          | 0.003909334                                         | 537.2593565                             |
| 1                                       | 654.5731497                                          | 0.003723687                                         | 654.5731497                             |
| 1.007768666                             | 652.6316357                                          | 0.00334613                                          | 653.8092361                             |
| 1                                       | 498.5861183                                          | 0.004097807                                         | 498.5861183                             |
| 1.002191381                             | 1958.453798                                          | 0.001374012                                         | 1959.563185                             |
| 1.005980066                             | 1323.777741                                          | 0.002290776                                         | 1325.576744                             |
| 1                                       | 1691.137615                                          | 0.002088088                                         | 1691.137615                             |
| 1                                       | 1568.058748                                          | 0.002647528                                         | 1568.058748                             |
| 1                                       | 266.3371758                                          | 0.009482466                                         | 266.3371758                             |
| 1.006936416                             | 534.916185                                           | 0.005508941                                         | 535.6115607                             |
| 1                                       | 1988.262085                                          | 0.001335362                                         | 1988.262085                             |
| 1                                       | 1234.993453                                          | 0.002243499                                         | 1234.993453                             |
| 1                                       | 807.5408451                                          | 0.003366702                                         | 807.5408451                             |
| 1.002307692                             | 1243.304038                                          | 0.001712259                                         | 1244.093846                             |
| 1                                       | 427.1044046                                          | 0.004223507                                         | 427.1044046                             |
| 1.006777108                             | 1614.12387                                           | 0.002313343                                         | 1615.611446                             |
| 1                                       | 61.87564767                                          | 0.034565041                                         | 61.87564767                             |
| 1.002277904                             | 2043.919704                                          | 0.001333131                                         | 2045.769932                             |
| 1                                       | 626.1008737                                          | 0.00328796                                          | 626.1008737                             |
| 1                                       | 679.3986928                                          | 0.004045713                                         | 679.3986928                             |
| 1                                       | 169.3333333                                          | 0.012460796                                         | 169.3333333                             |
| 1.007281553                             | 343.4466019                                          | 0.008846504                                         | 343.5121359                             |
| 1.002214022                             | 1940.033948                                          | 0.001393841                                         | 1940.919557                             |
| 1.020277882                             | 1048.844912                                          | 0.001753757                                         | 1054.477657                             |
| 1                                       | 1635.871409                                          | 0.001431508                                         | 1635.871409                             |
| 1.003676471                             | 1830.356107                                          | 0.001064991                                         | 1832.276144                             |
| 1.004613019                             | 1027.27755                                           | 0.003719194                                         | 1028.648385                             |
| 1                                       | 387.9725023                                          | 0.004506427                                         | 387.9725023                             |
| 1                                       | 428.2396514                                          | 0.008752827                                         | 428.2396514                             |
| 1                                       | 200.3212435                                          | 0.011968772                                         | 200.3212435                             |
| 1.005928854                             | 1950.844121                                          | 0.001135736                                         | 1953.153162                             |

| wavelet.LHH_gldzm_DistanceZoneVariability | wavelet.LHH_gldzm_ZonePercentage | wavelet.LHH_gldzm_IntensityVariabilityNormalized | wavelet.LHH_gldzm_LowIntensitySmallDistanceEmphasis | wavelet.LHH_gldzm_IntensityVariability |
|-------------------------------------------|----------------------------------|--------------------------------------------------|-----------------------------------------------------|----------------------------------------|
| 1269.006284                               | 0.599905749                      | 0.03353658                                       | 0.001981659                                         | 42.69206599                            |
| 509                                       | 0.544385027                      | 0.044383803                                      | 0.002710989                                         | 22.5913556                             |
| 844                                       | 0.550195567                      | 0.031566564                                      | 0.002983625                                         | 26.64218009                            |
| 361                                       | 0.369498465                      | 0.060412366                                      | 0.012885215                                         | 21.80886427                            |
| 1321                                      | 0.55785473                       | 0.037513732                                      | 0.001517535                                         | 49.55563967                            |
| 486                                       | 0.736363636                      | 0.02795983                                       | 0.003675767                                         | 13.58847737                            |
| 2930.067797                               | 0.522031499                      | 0.034567538                                      | 0.000830845                                         | 101.9742373                            |
| 1725.018465                               | 0.339271731                      | 0.059444496                                      | 0.003007979                                         | 103.017311                             |
| 2105.000949                               | 0.463484382                      | 0.049589262                                      | 0.001924599                                         | 104.4845752                            |
| 433                                       | 0.40391791                       | 0.067305282                                      | 0.016619656                                         | 29.14318707                            |
| 609                                       | 0.403846154                      | 0.046265514                                      | 0.007020941                                         | 28.17569787                            |
| 1010.001976                               | 0.439045553                      | 0.051580637                                      | 0.003155624                                         | 52.19960474                            |
| 511                                       | 0.273701125                      | 0.065000517                                      | 0.00733637                                          | 33.21526419                            |
| 848                                       | 0.493884683                      | 0.038395003                                      | 0.004044979                                         | 32.55896226                            |
| 808                                       | 0.407258065                      | 0.054967038                                      | 0.003811674                                         | 44.41336634                            |
| 2023                                      | 0.462294333                      | 0.035148193                                      | 0.002091915                                         | 71.10479486                            |
| 722                                       | 0.604690117                      | 0.035331988                                      | 0.00445379                                          | 25.50969529                            |
| 379                                       | 0.307380373                      | 0.066352922                                      | 0.008605556                                         | 25.14775726                            |
| 625                                       | 0.481510015                      | 0.05775104                                       | 0.005834807                                         | 36.0944                                |
| 2145.000932                               | 0.412964032                      | 0.054937631                                      | 0.003498867                                         | 117.9510946                            |
| 1013                                      | 0.334986772                      | 0.055672116                                      | 0.007335725                                         | 56.3958539                             |
| 464.0042918                               | 0.431881372                      | 0.062858038                                      | 0.015982025                                         | 29.29184549                            |
| 544                                       | 0.53125                          | 0.04725346                                       | 0.009202785                                         | 25.70588235                            |
| 1423                                      | 0.537589724                      | 0.040772294                                      | 0.002724811                                         | 58.018974                              |
| 443                                       | 0.347996858                      | 0.0692029                                        | 0.011179289                                         | 30.65688488                            |
| 1398                                      | 0.590122415                      | 0.034108608                                      | 0.001842769                                         | 47.68383405                            |
| 1897                                      | 0.586761522                      | 0.031276251                                      | 0.001708949                                         | 59.33104902                            |
| 985                                       | 0.356625634                      | 0.058414285                                      | 0.004847403                                         | 57.53807107                            |
| 283                                       | 0.63310962                       | 0.046535729                                      | 0.012805332                                         | 13.16961131                            |
| 1198                                      | 0.583252191                      | 0.036711157                                      | 0.003983152                                         | 43.97996661                            |
| 1853.001078                               | 0.389869693                      | 0.048299271                                      | 0.001689518                                         | 89.59514825                            |
| 1118.001786                               | 0.541324311                      | 0.034357462                                      | 0.002255924                                         | 38.48035714                            |
| 1852                                      | 0.573552183                      | 0.031167636                                      | 0.000918574                                         | 57.7224622                             |
| 1404                                      | 0.597446809                      | 0.03343317                                       | 0.001509022                                         | 46.94017094                            |
| 2499.028674                               | 0.570163488                      | 0.040470119                                      | 0.001731815                                         | 101.6204699                            |
| 860                                       | 0.286762254                      | 0.071322336                                      | 0.003432562                                         | 61.3372093                             |
| 1281                                      | 0.344262295                      | 0.056550399                                      | 0.004303697                                         | 72.44106167                            |
| 2287.146131                               | 0.44816896                       | 0.035258335                                      | 0.001184718                                         | 81.55252918                            |
| 681                                       | 0.553658537                      | 0.040225461                                      | 0.003810808                                         | 27.39353891                            |
| 3693.008646                               | 0.509078404                      | 0.034891802                                      | 0.001179645                                         | 129.1345582                            |
| 1114                                      | 0.429452583                      | 0.0485062                                        | 0.005201049                                         | 54.03590664                            |
| 1804.009945                               | 0.468063098                      | 0.05656787                                       | 0.005938984                                         | 102.3878453                            |
| 1431                                      | 0.391732822                      | 0.057767972                                      | 0.004396215                                         | 82.66596785                            |
| 1578                                      | 0.634244373                      | 0.029276121                                      | 0.001504512                                         | 46.19771863                            |
| 731                                       | 0.57198748                       | 0.037452209                                      | 0.005186215                                         | 27.37756498                            |
| 1136                                      | 0.413843352                      | 0.043962941                                      | 0.002268262                                         | 49.94190141                            |
| 2392                                      | 0.524331434                      | 0.036091249                                      | 0.001284372                                         | 86.33026756                            |
| 287                                       | 0.329506315                      | 0.068241693                                      | 0.006567407                                         | 19.58536585                            |
| 384                                       | 0.451233843                      | 0.056233724                                      | 0.007861832                                         | 21.59375                               |
| 429.0046404                               | 0.318786982                      | 0.071570459                                      | 0.013620535                                         | 30.84686775                            |
| 1352                                      | 0.526274815                      | 0.036727312                                      | 0.001873015                                         | 49.65532544                            |
| 2036.008815                               | 0.605754969                      | 0.03969769                                       | 0.002352571                                         | 81.06268364                            |
| 1769.001129                               | 0.392508865                      | 0.061130753                                      | 0.006564975                                         | 108.2625635                            |
| 592                                       | 0.536231884                      | 0.041390842                                      | 0.003100774                                         | 24.50337838                            |
| 573                                       | 0.430827068                      | 0.053181413                                      | 0.007043982                                         | 30.47294939                            |
| 1016                                      | 0.521025641                      | 0.042503023                                      | 0.002978414                                         | 43.18307087                            |
| 2150.033302                               | 0.534487021                      | 0.036237732                                      | 0.001105669                                         | 78.34597595                            |
| 1927                                      | 0.557258531                      | 0.032456322                                      | 0.001008165                                         | 62.5433316                             |
| 885                                       | 0.537014563                      | 0.043296626                                      | 0.002527003                                         | 38.31751412                            |
| 4781.050385                               | 0.526125534                      | 0.038144275                                      | 0.001135148                                         | 183.206954                             |
| 1170.006814                               | 0.664779162                      | 0.029695068                                      | 0.002338993                                         | 34.86201022                            |
| 1039                                      | 0.389138577                      | 0.060963149                                      | 0.00696487                                          | 63.34071222                            |
| 2689.293148                               | 0.471411297                      | 0.041635644                                      | 0.00096353                                          | 113.6236717                            |
| 4476.886991                               | 0.598976781                      | 0.031840304                                      | 0.000807934                                         | 145.3828296                            |
| 232                                       | 0.293670886                      | 0.082008026                                      | 0.018870092                                         | 19.02586207                            |
| 1973.081366                               | 0.515535992                      | 0.036728563                                      | 0.002151774                                         | 73.12656956                            |
| 707                                       | 0.542177914                      | 0.037589352                                      | 0.005143228                                         | 26.5767185                             |
| 3768.327397                               | 0.61088                          | 0.030070403                                      | 0.000840429                                         | 114.8088004                            |
| 3235                                      | 0.552330545                      | 0.043213118                                      | 0.001566219                                         | 139.7944359                            |
| 1523                                      | 0.525534852                      | 0.042705653                                      | 0.003909334                                         | 65.04070913                            |
| 581                                       | 0.447267129                      | 0.049297757                                      | 0.003723687                                         | 28.64199656                            |
| 2305.031075                               | 0.54009324                       | 0.038210938                                      | 0.003328113                                         | 88.5347432                             |
| 778                                       | 0.341377797                      | 0.061376147                                      | 0.004097807                                         | 47.75064267                            |
| 1367.001461                               | 0.606020363                      | 0.033178046                                      | 0.001372659                                         | 45.42074507                            |
| 1499.01196                                | 0.4806771                        | 0.037803115                                      | 0.002284531                                         | 56.89368771                            |
| 763                                       | 0.568554396                      | 0.035125539                                      | 0.002088088                                         | 26.80078637                            |
| 1549                                      | 0.646494157                      | 0.025526788                                      | 0.002647528                                         | 39.54099419                            |
| 347                                       | 0.362122944                      | 0.064139724                                      | 0.009482466                                         | 22.25648415                            |
| 861.0092486                               | 0.506736965                      | 0.049122924                                      | 0.005487101                                         | 42.49132948                            |
| 1324                                      | 0.566053869                      | 0.038152262                                      | 0.001335362                                         | 50.51359517                            |
| 1222                                      | 0.614379085                      | 0.033017162                                      | 0.002243499                                         | 40.34697218                            |
| 710                                       | 0.394663702                      | 0.045760762                                      | 0.003366702                                         | 32.49014085                            |
| 1298.001538                               | 0.39767513                       | 0.051039053                                      | 0.001710152                                         | 66.35076923                            |
| 1226                                      | 0.398958672                      | 0.054242101                                      | 0.004223507                                         | 66.50081566                            |
| 1322.013554                               | 0.544485445                      | 0.033674608                                      | 0.002302918                                         | 44.71987952                            |
| 193                                       | 0.125979112                      | 0.135976805                                      | 0.034565041                                         | 26.24352332                            |
| 1315.001519                               | 0.552201258                      | 0.035622595                                      | 0.001332255                                         | 46.91495824                            |
| 1259                                      | 0.459153902                      | 0.04408923                                       | 0.00328796                                          | 55.50833995                            |
| 765                                       | 0.522540984                      | 0.043680636                                      | 0.004045713                                         | 33.41568627                            |
| 549                                       | 0.271111111                      | 0.078244598                                      | 0.012460796                                         | 42.95628415                            |
| 410.0048544                               | 0.31595092                       | 0.053315581                                      | 0.008593672                                         | 21.96601942                            |
| 1353.001476                               | 0.568849706                      | 0.038656881                                      | 0.001392111                                         | 52.3800738                             |
| 2627.243335                               | 0.513795099                      | 0.039818692                                      | 0.00172414                                          | 106.0371761                            |
| 1462                                      | 0.443030303                      | 0.046096178                                      | 0.001431508                                         | 67.39261286                            |
| 2442.007353                               | 0.5625                           | 0.038498815                                      | 0.001062776                                         | 94.24509804                            |
| 1945.009226                               | 0.570134424                      | 0.033263705                                      | 0.003713683                                         | 64.89748847                            |
| 1091                                      | 0.387291445                      | 0.062103823                                      | 0.004506427                                         | 67.75527039                            |
| 459                                       | 0.438395415                      | 0.051789198                                      | 0.008752827                                         | 23.77124183                            |
| 193                                       | 0.231414868                      | 0.092378319                                      | 0.011968772                                         | 17.82901554                            |
| 3024.023715                               | 0.525805334                      | 0.032610649                                      | 0.001125267                                         | 99.00592885                            |

| wavelet.LHH_gldzm_HighIntensityLargeDistanceEmphasis | wavelet.LHH_gldzm_SmallDistanceEmphasis | wavelet.LHH_gldzm_SumVariance | wavelet.LHH_gldzm_Homogeneity1 | wavelet.LHH_gldzm_Homogeneity2 |
|------------------------------------------------------|-----------------------------------------|-------------------------------|--------------------------------|--------------------------------|
| 1246.003928                                          | 0.998821681                             | 4051.499768                   | 0.226282874                    | 0.138958064                    |
| 1741.882122                                          | 1                                       | 6000.039871                   | 0.265895373                    | 0.175287511                    |
| 1109.503555                                          | 1                                       | 3541.488097                   | 0.255807747                    | 0.171075791                    |
| 202.9556787                                          | 1                                       | 536.5376386                   | 0.35525857                     | 0.270305575                    |
| 1670.715367                                          | 1                                       | 5524.731764                   | 0.246987882                    | 0.160202391                    |
| 1142.253086                                          | 1                                       | 3518.266049                   | 0.175988758                    | 0.096299918                    |
| 2519.871525                                          | 0.997457627                             | 8766.091025                   | 0.264220369                    | 0.176405373                    |
| 569.2071552                                          | 0.998268898                             | 1832.552609                   | 0.373739536                    | 0.29285871                     |
| 865.4105363                                          | 0.999644044                             | 2773.528713                   | 0.303992825                    | 0.21736184                     |
| 150.0461894                                          | 1                                       | 362.5060751                   | 0.350195911                    | 0.261175133                    |
| 827.4022989                                          | 1                                       | 2624.653803                   | 0.339304864                    | 0.261414418                    |
| 628.6245059                                          | 0.999258893                             | 2010.716067                   | 0.308406381                    | 0.218472966                    |
| 299.2544031                                          | 1                                       | 876.5248245                   | 0.407677665                    | 0.332630316                    |
| 1514.826651                                          | 1                                       | 5045.271589                   | 0.277017021                    | 0.191659218                    |
| 544.8762376                                          | 1                                       | 1685.518023                   | 0.342249814                    | 0.258612092                    |
| 1599.067227                                          | 1                                       | 5347.278202                   | 0.289380613                    | 0.206219163                    |
| 681.8476454                                          | 1                                       | 2035.369176                   | 0.229605377                    | 0.140795858                    |
| 281.2744063                                          | 1                                       | 840.8321341                   | 0.387148201                    | 0.305785602                    |
| 373.1744                                             | 1                                       | 1082.454774                   | 0.298983303                    | 0.207233085                    |
| 460.5640429                                          | 0.999650675                             | 1371.206762                   | 0.324775013                    | 0.236267028                    |
| 332.5172754                                          | 1                                       | 934.7372679                   | 0.367424439                    | 0.286486696                    |
| 176.055794                                           | 0.998390558                             | 442.5783713                   | 0.32271                        | 0.231198657                    |
| 340.4595888                                          | 1                                       | 935.3572731                   | 0.2624739                      | 0.170634057                    |
| 742.869993                                           | 1                                       | 2262.761342                   | 0.265467432                    | 0.175733355                    |
| 227.1218962                                          | 1                                       | 642.5453234                   | 0.369526953                    | 0.283905671                    |
| 1386.497854                                          | 1                                       | 4501.365759                   | 0.241062088                    | 0.156218951                    |
| 2334.507644                                          | 1                                       | 8151.221022                   | 0.23363799                     | 0.146196022                    |
| 408.5928934                                          | 1                                       | 1211.199386                   | 0.35313573                     | 0.267619487                    |
| 393.3498233                                          | 1                                       | 1123.608237                   | 0.233137875                    | 0.142995808                    |
| 776.2479132                                          | 1                                       | 2376.571557                   | 0.245837064                    | 0.159412286                    |
| 1137.734232                                          | 0.999595687                             | 3717.567259                   | 0.337857177                    | 0.256978475                    |
| 1077.0375                                            | 0.999330357                             | 3403.19074                    | 0.247439846                    | 0.159821728                    |
| 3327.230022                                          | 1                                       | 11834.96639                   | 0.239358854                    | 0.152254958                    |
| 1868.512821                                          | 1                                       | 6399.620154                   | 0.234233377                    | 0.146883766                    |
| 1124.332537                                          | 0.998207885                             | 3642.741499                   | 0.251979384                    | 0.163265715                    |
| 517.4965116                                          | 1                                       | 1690.170468                   | 0.397848068                    | 0.317399021                    |
| 414.3614364                                          | 1                                       | 1225.218018                   | 0.352523712                    | 0.26879807                     |
| 2183.408993                                          | 0.995784695                             | 7478.595791                   | 0.294860527                    | 0.211718873                    |
| 689.9676946                                          | 1                                       | 2096.572057                   | 0.250271519                    | 0.159118257                    |
| 2032.853823                                          | 0.999189408                             | 6880.084922                   | 0.268055061                    | 0.181133898                    |
| 427.6292639                                          | 1                                       | 1205.65313                    | 0.315296239                    | 0.230831583                    |
| 334.5883978                                          | 0.998756906                             | 974.0154436                   | 0.299744823                    | 0.208069209                    |
| 409.8294899                                          | 1                                       | 1226.851007                   | 0.339516944                    | 0.253127021                    |
| 1769.691381                                          | 1                                       | 6093.836358                   | 0.208560697                    | 0.123555543                    |
| 612.3064295                                          | 1                                       | 1746.232055                   | 0.248229837                    | 0.159167659                    |
| 1832.728873                                          | 1                                       | 6262.312245                   | 0.322490368                    | 0.238006312                    |
| 1756.201923                                          | 1                                       | 5884.403626                   | 0.260406319                    | 0.17454748                     |
| 427.9721254                                          | 1                                       | 1234.947866                   | 0.370868915                    | 0.284566528                    |
| 309.2864583                                          | 1                                       | 846.8948188                   | 0.301697798                    | 0.208799155                    |
| 199.5846868                                          | 0.998259861                             | 542.4712845                   | 0.395269101                    | 0.315004564                    |
| 1385.488166                                          | 1                                       | 4645.906021                   | 0.255972478                    | 0.167743992                    |
| 808.9916748                                          | 0.998898139                             | 2505.996607                   | 0.231332349                    | 0.142211916                    |
| 266.0846979                                          | 0.99957651                              | 742.0917583                   | 0.337412008                    | 0.249304279                    |
| 1007.057432                                          | 1                                       | 3183.042335                   | 0.257979011                    | 0.169651137                    |
| 469.7382199                                          | 1                                       | 1385.669225                   | 0.312564388                    | 0.224670467                    |
| 715.3484252                                          | 1                                       | 2285.37429                    | 0.268839014                    | 0.177447713                    |
| 2134.822387                                          | 0.997918594                             | 7256.411848                   | 0.257248904                    | 0.169957593                    |
| 2602.703166                                          | 1                                       | 9175.923231                   | 0.242077509                    | 0.154067827                    |
| 1004.068927                                          | 1                                       | 3293.923342                   | 0.266076664                    | 0.175302216                    |
| 1416.624401                                          | 0.998282324                             | 4669.212595                   | 0.264874106                    | 0.181535166                    |
| 1288.157581                                          | 0.998722317                             | 4305.044804                   | 0.203290323                    | 0.118160167                    |
| 269.7305101                                          | 1                                       | 748.9753486                   | 0.336017811                    | 0.24707735                     |
| 2481.322829                                          | 0.994503481                             | 8455.947688                   | 0.29362612                     | 0.205373144                    |
| 2238.438458                                          | 0.99260841                              | 7513.961488                   | 0.222647081                    | 0.135360245                    |
| 129.1637931                                          | 1                                       | 311.5927397                   | 0.410962227                    | 0.331950116                    |
| 976.0878955                                          | 0.996609744                             | 2990.557685                   | 0.268471825                    | 0.183907088                    |
| 779.4738331                                          | 1                                       | 2381.273319                   | 0.246226426                    | 0.157225762                    |
| 2555.832897                                          | 0.995089052                             | 8797.536738                   | 0.218800788                    | 0.132239662                    |
| 1185.812983                                          | 1                                       | 3944.054232                   | 0.268158694                    | 0.180614607                    |
| 537.2593565                                          | 1                                       | 1607.80828                    | 0.269327051                    | 0.178824913                    |
| 654.5731497                                          | 1                                       | 2056.352544                   | 0.303843222                    | 0.21484319                     |
| 658.5196375                                          | 0.998057833                             | 1940.271959                   | 0.255679716                    | 0.168327298                    |
| 498.5861183                                          | 1                                       | 1541.291564                   | 0.374211123                    | 0.293765389                    |
| 1964.00073                                           | 0.999452155                             | 6603.17977                    | 0.222629797                    | 0.133368875                    |
| 1332.772757                                          | 0.998504983                             | 4311.354877                   | 0.288810989                    | 0.204461763                    |
| 1691.137615                                          | 1                                       | 5798.357489                   | 0.247729753                    | 0.162080318                    |
| 1568.058748                                          | 1                                       | 5139.036416                   | 0.206344509                    | 0.123186359                    |
| 266.3371758                                          | 1                                       | 752.7387459                   | 0.367723112                    | 0.284974738                    |
| 538.3930636                                          | 0.998265896                             | 1615.57192                    | 0.28528716                     | 0.195507513                    |
| 1988.262085                                          | 1                                       | 6882.569534                   | 0.243257242                    | 0.152996684                    |
| 1234.993453                                          | 1                                       | 4023.427821                   | 0.222915107                    | 0.136402375                    |
| 807.5408451                                          | 1                                       | 2599.696719                   | 0.343764116                    | 0.263308885                    |
| 1247.253077                                          | 0.999423077                             | 4210.467971                   | 0.33647189                     | 0.254080675                    |
| 427.1044046                                          | 1                                       | 1211.716035                   | 0.335720191                    | 0.249722539                    |
| 1621.561747                                          | 0.998305723                             | 5318.567021                   | 0.24570656                     | 0.15887873                     |
| 61.87564767                                          | 1                                       | 145.632324                    | 0.550608526                    | 0.502190342                    |
| 2053.170843                                          | 0.999430524                             | 7099.038609                   | 0.247369346                    | 0.158423984                    |
| 626.1008737                                          | 1                                       | 1859.727699                   | 0.303724256                    | 0.217645349                    |
| 679.3986928                                          | 1                                       | 2007.686332                   | 0.279460938                    | 0.191534788                    |
| 169.3333333                                          | 1                                       | 461.5678242                   | 0.42260909                     | 0.346479956                    |
| 343.7742718                                          | 0.998179612                             | 970.3860427                   | 0.380426503                    | 0.303193989                    |
| 1944.461993                                          | 0.999446494                             | 6702.043457                   | 0.255036138                    | 0.166579552                    |
| 1077.008637                                          | 0.994930529                             | 3442.062929                   | 0.269918903                    | 0.180700545                    |
| 1635.871409                                          | 1                                       | 5648.622927                   | 0.306335897                    | 0.218181555                    |
| 1839.956291                                          | 0.999080882                             | 6220.553339                   | 0.242858209                    | 0.15269687                     |
| 1034.131727                                          | 0.998846745                             | 3256.238964                   | 0.243690661                    | 0.157466897                    |
| 387.9725023                                          | 1                                       | 1094.757455                   | 0.3435629                      | 0.25626567                     |
| 428.2396514                                          | 1                                       | 1216.719885                   | 0.309459056                    | 0.222319919                    |
| 200.3212435                                          | 1                                       | 563.6408707                   | 0.436660141                    | 0.362109618                    |
| 1962.389328                                          | 0.998517787                             | 6604.829027                   | 0.260819737                    | 0.175870521                    |

| wavelet.LHH_glcml_ClusterShade | wavelet.LHH_glcml_MaximumProbability | wavelet.LHH_glcml_Idmn | wavelet.LHH_glcml_SumVariance2 | wavelet.LHH_glcml_Contrast | wavelet.LHH_glcml_DifferenceEntropy |
|--------------------------------|--------------------------------------|------------------------|--------------------------------|----------------------------|-------------------------------------|
| 367.7468012                    | 0.008643525                          | 0.981055527            | 141.3844164                    | 107.3073793                | 4.362930007                         |
| -335.0663747                   | 0.018297075                          | 0.988672742            | 78.94502248                    | 71.54595182                | 3.987746813                         |
| 70.52760648                    | 0.013618485                          | 0.976683321            | 172.5931758                    | 109.1372472                | 4.270514849                         |
| 24.18296903                    | 0.028612835                          | 0.972122928            | 23.58441938                    | 24.83410229                | 3.358511561                         |
| 543.4407866                    | 0.010860958                          | 0.982003257            | 126.2974669                    | 107.8092909                | 4.279496432                         |
| 375.3163633                    | 0.009069828                          | 0.957850407            | 175.5639345                    | 174.5622361                | 4.652852464                         |
| -216.6727918                   | 0.00982617                           | 0.989767085            | 157.9241665                    | 83.76125097                | 4.133907902                         |
| -31.19629981                   | 0.038220406                          | 0.988681342            | 25.24731922                    | 24.40094335                | 3.341082737                         |
| 118.5702505                    | 0.023430084                          | 0.984137426            | 47.28214662                    | 52.88144682                | 3.841169908                         |
| 5.882967975                    | 0.028451708                          | 0.965421673            | 20.6921045                     | 20.83789327                | 3.28195517                          |
| -41.07354986                   | 0.025830722                          | 0.981816541            | 83.47236129                    | 76.97536674                | 3.812003731                         |
| -37.38554655                   | 0.022890678                          | 0.985627604            | 38.71147676                    | 40.15316363                | 3.695863343                         |
| 20.63982288                    | 0.05149782                           | 0.983391052            | 20.16989667                    | 23.1896473                 | 3.16947516                          |
| 340.539656                     | 0.021317946                          | 0.985640142            | 122.9932562                    | 109.842725                 | 4.160722885                         |
| 23.28773563                    | 0.030889865                          | 0.983186501            | 32.84289845                    | 35.92247513                | 3.567072267                         |
| -477.3670973                   | 0.014144388                          | 0.98223132             | 147.6856835                    | 120.3133687                | 4.175796177                         |
| 182.2105618                    | 0.009405077                          | 0.972987136            | 123.0429491                    | 88.01429844                | 4.217837464                         |
| -42.75157511                   | 0.043667986                          | 0.981497071            | 20.34912695                    | 19.66085838                | 3.191411228                         |
| 46.01049103                    | 0.024834493                          | 0.974595065            | 30.81804905                    | 39.06482924                | 3.659286446                         |
| 77.54227463                    | 0.020020359                          | 0.983433949            | 33.9618747                     | 34.99289133                | 3.595068223                         |
| 3.143590816                    | 0.039036695                          | 0.98242264             | 28.06205966                    | 29.69007982                | 3.425534893                         |
| 20.68705251                    | 0.019248927                          | 0.970955745            | 27.98888267                    | 27.29871628                | 3.448720036                         |
| 57.74895808                    | 0.015449181                          | 0.969194195            | 54.12831766                    | 59.67705706                | 3.948444031                         |
| 294.7291151                    | 0.010678438                          | 0.97974333             | 102.204438                     | 64.87477034                | 4.023283613                         |
| 9.614474965                    | 0.032313605                          | 0.979240645            | 18.06676917                    | 19.26727434                | 3.199327323                         |
| 490.5195268                    | 0.013873155                          | 0.980410965            | 145.6789491                    | 127.2384268                | 4.405561333                         |
| -805.5013423                   | 0.008403387                          | 0.986635481            | 195.5173594                    | 121.6103436                | 4.37366788                          |
| 17.87108226                    | 0.028952706                          | 0.985271485            | 28.3608171                     | 28.37831396                | 3.427880071                         |
| 64.52473725                    | 0.015713978                          | 0.952151169            | 66.07013495                    | 78.05748795                | 4.104717069                         |
| 493.2439503                    | 0.010604368                          | 0.976479688            | 131.4419343                    | 98.74993263                | 4.273390128                         |
| 254.3235033                    | 0.033888115                          | 0.989414265            | 50.98667919                    | 57.21407795                | 3.767568668                         |
| 868.626421                     | 0.011321134                          | 0.978430264            | 157.3294616                    | 86.048414                  | 4.205550302                         |
| 554.2481592                    | 0.007668711                          | 0.99162505             | 217.2835059                    | 127.5573611                | 4.358611702                         |
| -427.2176213                   | 0.009380798                          | 0.981080764            | 161.4795609                    | 112.8483349                | 4.34148301                          |
| -60.94066453                   | 0.013880802                          | 0.980477498            | 79.78214959                    | 79.9211408                 | 4.151111784                         |
| -17.2116467                    | 0.042678895                          | 0.988993846            | 16.01447299                    | 16.02938357                | 3.076285544                         |
| 38.36832531                    | 0.031400051                          | 0.981650063            | 27.5180717                     | 30.87236091                | 3.478394295                         |
| -432.926687                    | 0.017058104                          | 0.988416442            | 146.862831                     | 95.43523798                | 4.086968356                         |
| 441.4042311                    | 0.012185095                          | 0.978534596            | 86.85804231                    | 74.70081008                | 4.09684878                          |
| 620.2820758                    | 0.010664693                          | 0.993141235            | 157.2145099                    | 106.1253893                | 4.199284259                         |
| 117.9820152                    | 0.027541126                          | 0.974239971            | 48.02686751                    | 52.51008867                | 3.799390647                         |
| 0.513405547                    | 0.018098742                          | 0.972111331            | 31.30363133                    | 35.85151932                | 3.652138961                         |
| 67.44166683                    | 0.027030699                          | 0.98224782             | 30.84608094                    | 33.33060893                | 3.521638957                         |
| -637.338966                    | 0.006111181                          | 0.977787505            | 207.5962909                    | 134.736671                 | 4.525077552                         |
| -206.8605282                   | 0.011959471                          | 0.976007627            | 110.3701575                    | 77.58392407                | 4.141904981                         |
| -449.8949598                   | 0.0221222                            | 0.9889088              | 92.23987751                    | 74.17987568                | 3.805861265                         |
| 336.1119194                    | 0.013896402                          | 0.987846366            | 113.6495253                    | 110.7652681                | 4.266976248                         |
| 47.37059543                    | 0.03205068                           | 0.988037756            | 19.66273118                    | 21.04769796                | 3.166646836                         |
| 54.22884295                    | 0.027572418                          | 0.977516785            | 32.73744379                    | 38.12695213                | 3.630389535                         |
| 4.276402898                    | 0.045554569                          | 0.977537348            | 16.43006446                    | 16.93544948                | 3.118245875                         |
| 382.4939907                    | 0.010133506                          | 0.98510301             | 125.3675522                    | 90.48681892                | 4.174110655                         |
| 137.8159683                    | 0.008812813                          | 0.971209546            | 81.3858371                     | 83.36787921                | 4.217943307                         |
| 18.66930812                    | 0.022554263                          | 0.97827054             | 25.58763002                    | 27.69120584                | 3.452442489                         |
| 473.2625024                    | 0.017948638                          | 0.982283714            | 81.41447945                    | 86.67534884                | 4.110204203                         |
| 205.1076104                    | 0.024392074                          | 0.985804158            | 43.82064772                    | 48.02794982                | 3.718270124                         |
| -129.0993676                   | 0.013837542                          | 0.976494014            | 69.07609224                    | 57.89246178                | 3.943463112                         |
| -225.4620054                   | 0.010305403                          | 0.986261539            | 132.4366255                    | 96.1856525                 | 4.221004813                         |
| -274.8352799                   | 0.009581408                          | 0.988851197            | 177.1242727                    | 96.94790487                | 4.250919658                         |
| 25.23456961                    | 0.012958763                          | 0.981292325            | 78.42196084                    | 69.91265286                | 4.021397943                         |
| 203.569728                     | 0.019021772                          | 0.985433209            | 94.88834586                    | 99.69417846                | 4.266501915                         |
| -162.1197498                   | 0.005978668                          | 0.968135843            | 202.2129855                    | 129.4456164                | 4.498729568                         |
| 13.03740841                    | 0.025775722                          | 0.980820028            | 23.94097315                    | 26.99166414                | 3.455627218                         |
| -261.8010877                   | 0.012648626                          | 0.989641356            | 110.3633844                    | 90.79176805                | 3.961290185                         |
| 26.54551559                    | 0.005671048                          | 0.983842322            | 183.8422965                    | 122.0836615                | 4.23436335                          |
| 11.99099896                    | 0.049559263                          | 0.974210725            | 11.9066085                     | 12.81201307                | 2.923419554                         |
| 385.8250288                    | 0.018523158                          | 0.981208034            | 85.49243055                    | 94.27511052                | 4.204869985                         |
| 336.7395618                    | 0.009617927                          | 0.977717801            | 106.7506185                    | 80.35147833                | 4.160232429                         |
| -142.1983491                   | 0.005979511                          | 0.989473798            | 208.6174452                    | 138.7390466                | 4.497996569                         |
| 131.8425646                    | 0.014320675                          | 0.984639256            | 75.59623523                    | 81.23895851                | 4.11445402                          |
| 22.79814525                    | 0.01060317                           | 0.975468327            | 82.92350378                    | 57.64757094                | 3.955072015                         |
| 75.46839777                    | 0.022985226                          | 0.982209436            | 41.55241401                    | 44.93735134                | 3.751044432                         |
| 225.973478                     | 0.011730467                          | 0.977991857            | 83.55793267                    | 85.30069251                | 4.194689367                         |
| 5.75642893                     | 0.040051779                          | 0.988323245            | 26.73513231                    | 28.09353078                | 3.367097255                         |
| 62.19068614                    | 0.007500081                          | 0.986715571            | 148.5940594                    | 100.67969                  | 4.306374402                         |
| 289.2234704                    | 0.015830626                          | 0.983220125            | 123.8565442                    | 97.0731168                 | 4.106227412                         |
| -187.3914275                   | 0.01207832                           | 0.979150662            | 131.580062                     | 104.6635657                | 4.27902251                          |
| 4158.942978                    | 0.007301136                          | 0.977235517            | 378.9534211                    | 198.0412507                | 4.67186054                          |
| 27.18489578                    | 0.039660415                          | 0.980602056            | 21.80486823                    | 25.15393943                | 3.318754012                         |
| 5.840171639                    | 0.015963289                          | 0.979912829            | 53.42321011                    | 53.40357621                | 3.856646734                         |
| 5.148682813                    | 0.008066663                          | 0.987550981            | 114.5660761                    | 80.9656253                 | 4.160315576                         |
| 425.1149786                    | 0.008835916                          | 0.979600228            | 153.0379002                    | 116.1568249                | 4.416197306                         |
| -7.628265689                   | 0.03645247                           | 0.989355374            | 43.03282736                    | 52.59787111                | 3.680515314                         |
| 117.0649329                    | 0.033096159                          | 0.988707387            | 43.65246689                    | 51.1677068                 | 3.719002589                         |
| 58.96427438                    | 0.023675376                          | 0.977842645            | 31.4456703                     | 36.20000098                | 3.570648356                         |
| 971.7908986                    | 0.007255597                          | 0.984473863            | 176.9529598                    | 112.843783                 | 4.272832039                         |
| -3.543236189                   | 0.115177901                          | 0.984538441            | 4.251133969                    | 3.724781123                | 2.190317503                         |
| -149.0610425                   | 0.009344704                          | 0.986841696            | 137.736711                     | 81.01098753                | 4.17325922                          |
| 280.9656537                    | 0.029911817                          | 0.981229187            | 55.02695546                    | 64.61272885                | 3.901064734                         |
| 169.9920728                    | 0.021104847                          | 0.979880854            | 63.08549169                    | 71.98551638                | 4.001544126                         |
| 2.163401001                    | 0.049113379                          | 0.984311699            | 11.96246495                    | 12.40388571                | 2.917339473                         |
| 141.2520191                    | 0.043375869                          | 0.984782394            | 35.85824321                    | 35.13919316                | 3.409979964                         |
| 329.5193481                    | 0.009806836                          | 0.987240919            | 130.1493325                    | 99.16227934                | 4.201718158                         |
| 237.5989941                    | 0.013501789                          | 0.9841134              | 85.58596199                    | 68.73932547                | 4.050508842                         |
| 140.0113892                    | 0.015854915                          | 0.991122039            | 76.52702107                    | 54.19497628                | 3.800455061                         |
| -0.40695399                    | 0.009542584                          | 0.986088501            | 105.7116206                    | 84.66289316                | 4.182348883                         |
| 60.30525427                    | 0.014751106                          | 0.978375717            | 147.7229193                    | 95.52980801                | 4.28333471                          |
| 105.5445931                    | 0.026098621                          | 0.985283707            | 27.00816562                    | 28.30378418                | 3.434951882                         |
| 68.72663449                    | 0.029904259                          | 0.977878196            | 41.03617794                    | 45.90778198                | 3.75138784                          |
| 7.261988636                    | 0.060038671                          | 0.981165337            | 10.19155427                    | 9.952360658                | 2.771091347                         |
| 472.1855263                    | 0.011304899                          | 0.985713455            | 176.4404185                    | 117.5857815                | 4.30239943                          |

| wavelet.LHH_glm_InverseVariance | wavelet.LHH_glm_Entropy | wavelet.LHH_glm_Dissimilarity | wavelet.LHH_glm_DifferenceVariance | wavelet.LHH_glm_Ldn | wavelet.LHH_glm_Ldm | wavelet.LHH_glm_Correlation |
|---------------------------------|-------------------------|-------------------------------|------------------------------------|---------------------|---------------------|-----------------------------|
| 0.145883629                     | 9.241885417             | 7.626788423                   | 47.70960085                        | 0.910436228         | 0.138958064         | 0.150290335                 |
| 0.185967431                     | 8.136335458             | 5.941236565                   | 35.74204079                        | 0.931779211         | 0.175287511         | 0.049367961                 |
| 0.179356768                     | 9.026374918             | 7.199215069                   | 55.12751132                        | 0.907532395         | 0.170705791         | 0.23196671                  |
| 0.280104615                     | 7.145082542             | 3.613146407                   | 11.50770245                        | 0.894832098         | 0.270305575         | -0.204201759                |
| 0.169280836                     | 8.966141561             | 7.192330204                   | 53.80417243                        | 0.917044825         | 0.160202391         | 0.092366656                 |
| 0.10472382                      | 8.949116927             | 10.32434196                   | 63.20774541                        | 0.863830565         | 0.096299918         | 0.01079668                  |
| 0.182204276                     | 9.342919621             | 6.350991214                   | 42.48029076                        | 0.935981183         | 0.176405373         | 0.308474975                 |
| 0.295671394                     | 7.251997342             | 3.468081979                   | 12.15301688                        | 0.932813024         | 0.29285871          | 0.017161799                 |
| 0.219550117                     | 8.157372023             | 5.102117061                   | 25.94590213                        | 0.920995902         | 0.21736184          | -0.04791208                 |
| 0.26752679                      | 7.143445216             | 3.461788232                   | 8.640896002                        | 0.879018182         | 0.261175133         | -0.004164199                |
| 0.264772845                     | 7.892948254             | 5.314300593                   | 47.94276974                        | 0.927093799         | 0.261414418         | 0.051013659                 |
| 0.223011113                     | 7.84905739              | 4.616635284                   | 18.45091379                        | 0.9219807           | 0.218472966         | -0.012408294                |
| 0.329028414                     | 6.636376211             | 3.126142997                   | 13.03935381                        | 0.925024693         | 0.332630316         | -0.052211845                |
| 0.199438315                     | 8.361783607             | 6.68478075                    | 63.44482687                        | 0.930922915         | 0.191659218         | 0.037585971                 |
| 0.265462326                     | 7.51207367              | 4.163564114                   | 18.2361256                         | 0.919904206         | 0.258612092         | -0.03906454                 |
| 0.21022134                      | 8.989114004             | 6.750850518                   | 73.51342842                        | 0.926498872         | 0.206219163         | 0.110231251                 |
| 0.14411287                      | 8.893719842             | 7.112535257                   | 35.45721584                        | 0.891488582         | 0.140795858         | 0.170361183                 |
| 0.303045438                     | 6.830036923             | 3.144007422                   | 9.573272002                        | 0.914556899         | 0.305785602         | 0.030540111                 |
| 0.217597879                     | 7.651208065             | 4.644438884                   | 16.73502775                        | 0.896334419         | 0.207233085         | -0.10221577                 |
| 0.24308337                      | 7.798950794             | 4.257872669                   | 16.458008                          | 0.901757916         | 0.236267028         | -0.012321912                |
| 0.283361562                     | 7.295164268             | 3.737994013                   | 15.14178553                        | 0.919310539         | 0.286486966         | -0.027561601                |
| 0.236654773                     | 7.474636406             | 3.984142798                   | 11.02001836                        | 0.887511899         | 0.231198657         | 0.008181133                 |
| 0.180403328                     | 8.221703044             | 5.747210664                   | 26.00263707                        | 0.886313325         | 0.170634057         | -0.042589882                |
| 0.182583597                     | 8.853395749             | 5.925933601                   | 28.74958375                        | 0.907733903         | 0.175733355         | 0.230193402                 |
| 0.291825892                     | 6.905899065             | 3.224323442                   | 8.632109512                        | 0.906732607         | 0.283905671         | -0.031050724                |
| 0.158938746                     | 9.070660964             | 7.809905469                   | 63.83829628                        | 0.91411929          | 0.156218951         | 0.06617211                  |
| 0.152289858                     | 9.515671492             | 7.656018388                   | 61.44765269                        | 0.927505133         | 0.146196022         | 0.246024912                 |
| 0.268207754                     | 7.380101916             | 3.76010283                    | 13.89022444                        | 0.92327366          | 0.267619487         | 0.000365177                 |
| 0.155166259                     | 8.027680788             | 6.758259104                   | 30.80045946                        | 0.858203322         | 0.142995808         | -0.063150294                |
| 0.166767278                     | 9.020075104             | 7.12295047                    | 46.34563811                        | 0.903462967         | 0.159412286         | 0.150440012                 |
| 0.254511327                     | 7.859425571             | 4.827479346                   | 33.07801796                        | 0.940255628         | 0.256978475         | -0.047628583                |
| 0.165516352                     | 9.215726831             | 6.789717491                   | 38.42252247                        | 0.905423793         | 0.159821728         | 0.289732092                 |
| 0.160353924                     | 9.508815977             | 7.612831215                   | 68.10172183                        | 0.943390364         | 0.152254958         | 0.267397915                 |
| 0.157170644                     | 9.307511483             | 7.511513449                   | 54.87853806                        | 0.913459181         | 0.146883766         | 0.187763208                 |
| 0.172319278                     | 8.842452886             | 6.518977907                   | 35.85238999                        | 0.909984529         | 0.163265715         | -0.003889759                |
| 0.320241497                     | 6.736208865             | 2.878482384                   | 7.587541643                        | 0.931859266         | 0.317399021         | 0.001215188                 |
| 0.268741311                     | 7.45589495              | 3.898345859                   | 15.11293859                        | 0.915864957         | 0.26879807          | -0.044136928                |
| 0.214372145                     | 9.047902915             | 6.194037571                   | 55.91629788                        | 0.938032104         | 0.211718873         | 0.224016565                 |
| 0.164792687                     | 8.540810536             | 6.349763657                   | 33.6309796                         | 0.905114204         | 0.195118257         | 0.07764635                  |
| 0.187538093                     | 9.257789321             | 6.685901528                   | 60.29557348                        | 0.950329344         | 0.181133898         | 0.200308353                 |
| 0.23535419                      | 9.986910201             | 26.4157747                    | 26.4157747                         | 0.903079566         | 0.230831583         | -0.028769904                |
| 0.220267746                     | 7.904953853             | 4.548064285                   | 14.7675297                         | 0.890121967         | 0.208069209         | -0.0604965                  |
| 0.257395729                     | 7.57092923              | 4.0519267                     | 16.40328038                        | 0.916554731         | 0.253127021         | -0.030731017                |
| 0.128144788                     | 9.697286297             | 8.595049617                   | 58.92077902                        | 0.902982854         | 0.123555543         | 0.222836068                 |
| 0.164726808                     | 8.824204963             | 6.557893832                   | 33.65223771                        | 0.899188903         | 0.159167659         | 0.17877074                  |
| 0.244848816                     | 8.231557412             | 5.174907204                   | 46.86320363                        | 0.941588201         | 0.238006312         | 0.113002754                 |
| 0.181815189                     | 8.941281802             | 7.027728939                   | 59.52950645                        | 0.933354344         | 0.17454748          | 0.016189629                 |
| 0.294331961                     | 6.7171488               | 3.21890895                    | 10.50809537                        | 0.930019544         | 0.284666528         | -0.035931091                |
| 0.218949056                     | 7.555551084             | 4.576838302                   | 16.72621957                        | 0.902065342         | 0.209799155         | -0.06963635                 |
| 0.311516675                     | 6.720468667             | 2.972269987                   | 7.917774334                        | 0.905017224         | 0.315004564         | -0.016768684                |
| 0.174235056                     | 9.035768596             | 6.641154661                   | 45.39765517                        | 0.923228399         | 0.167743992         | 0.167541461                 |
| 0.148945095                     | 9.030286649             | 6.976970987                   | 33.10484286                        | 0.887842516         | 0.142211916         | -0.000312203                |
| 0.258007337                     | 7.533932924             | 3.871198303                   | 12.31087766                        | 0.904842398         | 0.249304279         | -0.033448378                |
| 0.182416752                     | 8.305194654             | 6.499118591                   | 42.87839934                        | 0.91688599          | 0.169651137         | -0.025421404                |
| 0.228253169                     | 7.726163481             | 4.77622536                    | 24.54530099                        | 0.925569344         | 0.224670467         | -0.035104582                |
| 0.183661969                     | 8.489917586             | 5.638771522                   | 25.27815998                        | 0.900270847         | 0.177447713         | 0.094071095                 |
| 0.176365428                     | 9.200188131             | 6.788257503                   | 48.85590935                        | 0.927081172         | 0.169957593         | 0.166665045                 |
| 0.164054752                     | 9.463457484             | 7.019784239                   | 46.37651621                        | 0.931773621         | 0.154067827         | 0.296983489                 |
| 0.182260811                     | 8.436502719             | 5.968963224                   | 33.35229291                        | 0.913249224         | 0.175302216         | 0.064793105                 |
| 0.181109804                     | 9.052578499             | 6.919124628                   | 49.9117361                         | 0.925068354         | 0.181535166         | -0.026760029                |
| 0.121991272                     | 9.600870752             | 8.654970332                   | 51.56395384                        | 0.882983891         | 0.118160167         | 0.226037905                 |
| 0.2514724                       | 7.470138861             | 3.863832518                   | 11.82436968                        | 0.909239599         | 0.24707735          | -0.054339946                |
| 0.213089206                     | 8.614985417             | 5.831264762                   | 56.12445541                        | 0.94274041          | 0.205373144         | 0.101927855                 |
| 0.141783212                     | 9.823489603             | 7.928153121                   | 56.92600295                        | 0.918493107         | 0.139360245         | 0.210923244                 |
| 0.336911567                     | 6.282133538             | 2.624588883                   | 5.760557524                        | 0.897188331         | 0.331950116         | -0.037822918                |
| 0.191989247                     | 8.743578216             | 6.68400458                    | 47.89757441                        | 0.916430683         | 0.183907088         | -0.046875696                |
| 0.165711179                     | 8.803808655             | 6.615365608                   | 35.79936945                        | 0.903141233         | 0.157225762         | 0.148845744                 |
| 0.139299514                     | 9.878014843             | 8.322912525                   | 67.50227388                        | 0.934242488         | 0.132239662         | 0.211699503                 |
| 0.1853274                       | 8.722719026             | 6.273447981                   | 40.44306231                        | 0.922439904         | 0.180614607         | -0.035490824                |
| 0.187724114                     | 8.773697185             | 5.65454373                    | 24.78585525                        | 0.898146561         | 0.178824913         | 0.189277813                 |
| 0.217466609                     | 7.831505351             | 4.844637414                   | 21.02971449                        | 0.914464141         | 0.21484319          | -0.029040044                |
| 0.172975829                     | 8.914349382             | 6.656902937                   | 39.50016929                        | 0.906096601         | 0.168327298         | -0.00919246                 |
| 0.295131056                     | 7.167308084             | 3.575016853                   | 14.98593959                        | 0.934107347         | 0.293765389         | -0.019728306                |
| 0.143008789                     | 9.298499121             | 7.418193908                   | 44.4508242                         | 0.923306577         | 0.133368875         | 0.200153061                 |
| 0.208946296                     | 8.805130902             | 6.32483918                    | 56.25840984                        | 0.925416402         | 0.204461763         | 0.127861247                 |
| 0.169141354                     | 8.903877608             | 7.242419611                   | 50.59263879                        | 0.909859417         | 0.162080318         | 0.125145517                 |
| 0.131687485                     | 9.782410927             | 6.966765469                   | 98.33033669                        | 0.908133225         | 0.123186359         | 0.329742731                 |
| 0.28913814                      | 6.9618176               | 3.514374479                   | 12.41057266                        | 0.913392242         | 0.284974738         | -0.059030828                |
| 0.205277595                     | 8.156355976             | 5.297308728                   | 24.42420453                        | 0.90925381          | 0.195507513         | 0.00349669                  |
| 0.159149083                     | 9.063145464             | 6.620775656                   | 36.23449977                        | 0.926017737         | 0.152996684         | 0.182362599                 |
| 0.141345477                     | 9.272721114             | 7.919638692                   | 51.8688623                         | 0.907585328         | 0.136402375         | 0.149851786                 |
| 0.26720654                      | 7.468869904             | 4.629782998                   | 30.19014846                        | 0.940166471         | 0.263308885         | -0.08294744                 |
| 0.250737717                     | 7.744889971             | 4.670914373                   | 28.48116481                        | 0.936869383         | 0.254080675         | -0.074092018                |
| 0.251504426                     | 7.657376881             | 4.223755774                   | 17.49030363                        | 0.907917179         | 0.249722539         | -0.053683913                |
| 0.166100736                     | 9.304885916             | 7.246599137                   | 59.00723183                        | 0.922965931         | 0.15887873          | 0.224404636                 |
| 0.450786616                     | 4.853320719             | 1.392410749                   | 1.759598267                        | 0.920604605         | 0.502190342         | 0.061677693                 |
| 0.163013001                     | 9.173862096             | 6.62661051                    | 36.07245262                        | 0.924293459         | 0.158423984         | 0.268080355                 |
| 0.22179999                      | 8.02390453              | 5.389297169                   | 34.49822387                        | 0.918203404         | 0.217645349         | -0.089112681                |
| 0.197548326                     | 8.112150409             | 5.869834161                   | 36.4447988                         | 0.912586172         | 0.191534788         | -0.073100991                |
| 0.347359042                     | 6.350573309             | 2.538975123                   | 5.861931965                        | 0.919582783         | 0.346479956         | -0.018310541                |
| 0.298537806                     | 7.028145153             | 3.784539537                   | 20.20587329                        | 0.92908414          | 0.303193989         | 0.006955641                 |
| 0.174713511                     | 8.950493581             | 6.775638082                   | 52.46406745                        | 0.930437623         | 0.166579552         | 0.140906458                 |
| 0.187311428                     | 8.842845072             | 5.945436167                   | 32.83511607                        | 0.919403079         | 0.180700545         | 0.118168118                 |
| 0.224836194                     | 8.390702158             | 4.979244022                   | 29.03529724                        | 0.941425587         | 0.218181555         | 0.17423472                  |
| 0.15977509                      | 9.082864624             | 6.693716624                   | 38.35943989                        | 0.922881339         | 0.15269687          | 0.11386677                  |
| 0.167063505                     | 9.262775734             | 7.095519453                   | 44.01007624                        | 0.906016148         | 0.157466897         | 0.221609276                 |
| 0.264360003                     | 7.40691981              | 3.812556859                   | 13.42572898                        | 0.922039112         | 0.25626567          | -0.021428104                |
| 0.222327125                     | 7.740708328             | 4.849839364                   | 21.71285674                        | 0.906271391         | 0.222319919         | -0.046654964                |
| 0.362201914                     | 6.093732973             | 2.310972238                   | 4.524091856                        | 0.911235903         | 0.362109618         | 0.009439955                 |
| 0.181871194                     | 9.433776991             | 7.191599931                   | 64.34467263                        | 0.928747818         | 0.175870521         | 0.206372708                 |

| wavelet.LHH_glm_Autocorrelation | wavelet.LHH_glm_SumEntropy | wavelet.LHH_glm_AverageIntensity | wavelet.LHH_glm_Energy | wavelet.LHH_glm_SumSquares | wavelet.LHH_glm_ClusterProminence |
|---------------------------------|----------------------------|----------------------------------|------------------------|----------------------------|-----------------------------------|
| 1165.487709                     | 5.497524788                | 34.66905587                      | 0.002434165            | 62.5624075                 | 94349.61176                       |
| 1676.526017                     | 4.89727432                 | 41.42578073                      | 0.005243715            | 37.00618429                | 60314.8822                        |
| 1027.869877                     | 5.581581784                | 32.43475596                      | 0.00308991             | 69.82770632                | 123724.08                         |
| 179.9914278                     | 4.207513554                | 13.45476618                      | 0.011428527            | 12.36634781                | 2714.347747                       |
| 1556.831638                     | 5.322625971                | 39.99451797                      | 0.003215117            | 59.10949264                | 103049.7972                       |
| 1004.137449                     | 5.551072756                | 32.57730309                      | 0.002427517            | 86.48220239                | 123437.5355                       |
| 2437.936993                     | 5.594574932                | 49.71671844                      | 0.002581802            | 60.09017203                | 117768.2048                       |
| 546.4863513                     | 4.233106895                | 23.4978655                       | 0.01320207             | 12.69625007                | 4240.174767                       |
| 807.7864542                     | 4.679542405                | 28.76192727                      | 0.006455997            | 25.05065047                | 14446.74798                       |
| 128.2170074                     | 4.16233403                 | 11.32488707                      | 0.010328322            | 10.38249944                | 1648.85047                        |
| 768.2215043                     | 4.965340501                | 28.05671121                      | 0.007611762            | 39.77413265                | 50777.58097                       |
| 598.3958137                     | 4.532065238                | 24.8191006                       | 0.007243883            | 19.60385953                | 9756.305409                       |
| 275.098498                      | 3.954764386                | 16.7861584                       | 0.019675941            | 11.23283427                | 3440.820312                       |
| 1417.424719                     | 5.050049776                | 38.17038176                      | 0.005687275            | 57.60190315                | 150673.3749                       |
| 506.9392777                     | 4.412111309                | 22.70085557                      | 0.010161773            | 17.42448933                | 6829.977737                       |
| 1510.854116                     | 5.455084318                | 39.33722866                      | 0.003859555            | 65.26074104                | 125466.1309                       |
| 611.7784571                     | 5.383142568                | 25.11559484                      | 0.002757183            | 52.45230702                | 67149.56751                       |
| 267.5579256                     | 4.060917181                | 16.44308992                      | 0.015258318            | 10.4063705                 | 2528.598968                       |
| 336.9052873                     | 4.393956286                | 18.75678668                      | 0.007614856            | 17.11956701                | 5122.51243                        |
| 420.9368716                     | 4.477998194                | 20.68148828                      | 0.007721914            | 17.21984307                | 6739.164892                       |
| 294.5944981                     | 4.24170116                 | 17.44661877                      | 0.013296479            | 14.13749127                | 5488.993158                       |
| 152.9864763                     | 4.363226598                | 12.37403472                      | 0.007806365            | 13.96798718                | 3390.920593                       |
| 295.9883133                     | 4.804472005                | 17.63443321                      | 0.004639162            | 28.43516132                | 14062.90324                       |
| 679.065203                      | 5.276601872                | 26.3262811                       | 0.003344328            | 42.01172569                | 46114.87762                       |
| 210.1759164                     | 4.026823087                | 14.53579268                      | 0.012750508            | 9.569748541                | 1662.024307                       |
| 1278.735325                     | 5.391747086                | 36.37829807                      | 0.003132483            | 67.93949439                | 134112.788                        |
| 2270.746009                     | 5.72159612                 | 48.16078312                      | 0.002076288            | 77.6323432                 | 220743.0918                       |
| 374.4410564                     | 4.309238147                | 19.53258135                      | 0.010704402            | 13.81918433                | 5623.90843                        |
| 346.3371718                     | 4.860598165                | 19.17531548                      | 0.004791836            | 35.11971136                | 17822.36856                       |
| 704.6737729                     | 5.400435708                | 26.94638257                      | 0.002990846            | 57.36072004                | 95453.16395                       |
| 1059.220612                     | 4.587014409                | 32.91763862                      | 0.009882198            | 27.6141617                 | 25956.38169                       |
| 995.9834192                     | 5.578410923                | 31.81213882                      | 0.002435512            | 61.01229527                | 101783.0456                       |
| 3247.026286                     | 5.785869825                | 57.50261356                      | 0.002074602            | 85.43090276                | 270019.0232                       |
| 1801.194236                     | 5.612006912                | 42.9463062                       | 0.002339707            | 67.30525685                | 117563.8687                       |
| 1047.772118                     | 5.05010539                 | 32.92419407                      | 0.003739249            | 39.92577458                | 37566.70875                       |
| 503.0235966                     | 3.940516005                | 22.49954982                      | 0.016190655            | 7.688887322                | 1608.51027                        |
| 377.8070425                     | 4.310466775                | 19.67691033                      | 0.010665391            | 14.2852127                 | 4333.223427                       |
| 2087.886274                     | 5.479435952                | 46.10341433                      | 0.003871768            | 59.38870924                | 138968.1644                       |
| 626.3800124                     | 5.103854663                | 25.45395563                      | 0.00382783             | 40.3215501                 | 42683.55949                       |
| 1926.710436                     | 5.504167309                | 44.368302                        | 0.003076963            | 65.31651485                | 229857.9909                       |
| 372.7325949                     | 4.647615827                | 19.63957716                      | 0.007730424            | 25.20355819                | 14096.90507                       |
| 308.1136933                     | 4.467972041                | 17.88125065                      | 0.006437669            | 17.12809973                | 4262.4443                         |
| 378.8822235                     | 4.378858761                | 19.66994528                      | 0.009178133            | 15.88961043                | 6721.454107                       |
| 1721.336939                     | 5.815911132                | 42.04263883                      | 0.001640189            | 84.15910783                | 159636.5668                       |
| 531.8729886                     | 5.322231539                | 23.39094632                      | 0.003015143            | 46.7287553                 | 46549.46514                       |
| 1750.364475                     | 5.016914175                | 42.2209381                       | 0.006220441            | 40.68965039                | 92006.33857                       |
| 1647.812243                     | 5.203301118                | 41.20926046                      | 0.004032137            | 55.96656202                | 106977.935                        |
| 377.1894512                     | 3.998865331                | 19.5652001                       | 0.013465309            | 9.882463819                | 3570.611121                       |
| 269.9669716                     | 4.410373106                | 16.81728136                      | 0.00796164             | 17.83218916                | 6272.765944                       |
| 180.6403155                     | 3.955475039                | 13.45489998                      | 0.015874906            | 8.433915845                | 1411.695089                       |
| 1327.964521                     | 5.40786368                 | 36.89243321                      | 0.002853448            | 53.95222364                | 86940.30842                       |
| 738.9084776                     | 5.143984996                | 27.75169697                      | 0.002751684            | 41.23001685                | 26521.53531                       |
| 240.9517716                     | 4.312271667                | 15.70220871                      | 0.008837489            | 13.95217099                | 3065.986622                       |
| 917.6417175                     | 4.936727253                | 30.87289113                      | 0.004850039            | 42.32189659                | 53239.62471                       |
| 422.4623706                     | 4.528426163                | 20.89276985                      | 0.007589029            | 23.42399215                | 19958.72473                       |
| 680.04349                       | 4.971490922                | 26.44667557                      | 0.004153891            | 31.96120465                | 22532.23725                       |
| 2028.431631                     | 5.471119486                | 45.53493247                      | 0.002808776            | 56.26359355                | 84457.06165                       |
| 2547.429033                     | 5.684133004                | 50.90877697                      | 0.002180697            | 67.63302862                | 149706.8223                       |
| 954.6440745                     | 5.020605521                | 31.29948176                      | 0.004376264            | 37.48056308                | 36472.77336                       |
| 1322.758306                     | 5.139043105                | 36.98234838                      | 0.00402549             | 48.4136758                 | 65884.05919                       |
| 1237.630385                     | 5.787164007                | 35.65621623                      | 0.001612354            | 82.19992818                | 129440.2317                       |
| 242.5138044                     | 4.268572675                | 15.77906101                      | 0.009005844            | 13.26157806                | 2550.606965                       |
| 2335.558363                     | 5.199867831                | 48.7906819                       | 0.004395092            | 49.38617146                | 102881.5489                       |
| 2101.582889                     | 5.732809099                | 46.38133645                      | 0.001691711            | 75.5496842                 | 158126.5872                       |
| 110.3680132                     | 3.72238654                 | 10.51636264                      | 0.020345802            | 6.179655391                | 701.8987992                       |
| 865.7122696                     | 5.022039642                | 30.03933476                      | 0.004852735            | 45.14221534                | 52201.08711                       |
| 708.5819394                     | 5.298153264                | 27.00802801                      | 0.003023498            | 46.89606758                | 49990.24069                       |
| 2442.487479                     | 5.812574588                | 50.03926753                      | 0.001703693            | 86.19805909                | 212388.8995                       |
| 1126.825468                     | 4.981838047                | 34.07104566                      | 0.004160662            | 39.35976287                | 44685.40736                       |
| 495.2524894                     | 5.174397533                | 22.47042173                      | 0.0032853              | 35.35641305                | 25866.02344                       |
| 611.0848491                     | 4.58829916                 | 25.06712289                      | 0.007018797            | 22.26408641                | 10134.53603                       |
| 580.1220518                     | 5.100381351                | 24.60927013                      | 0.003532208            | 42.1747963                 | 37341.06186                       |
| 464.909116                      | 4.222395274                | 21.70002293                      | 0.01350646             | 13.79998013                | 5587.809513                       |
| 1856.302398                     | 5.551285497                | 43.61115474                      | 0.002204275            | 62.89941507                | 100875.6902                       |
| 1232.243005                     | 5.304840286                | 35.5198985                       | 0.004308706            | 55.39136146                | 91715.16791                       |
| 1635.619651                     | 5.441453233                | 40.9401805                       | 0.003020958            | 57.21880737                | 74607.20054                       |
| 1454.076603                     | 6.076610458                | 38.45563128                      | 0.001694557            | 144.9326984                | 750946.7989                       |
| 241.6456455                     | 4.108820352                | 15.70891182                      | 0.013352367            | 12.30197868                | 2941.852283                       |
| 490.4865817                     | 4.770148413                | 22.47110661                      | 0.005218725            | 27.06259578                | 16188.22372                       |
| 1929.176357                     | 5.385417014                | 44.39751635                      | 0.002558846            | 48.62779247                | 59104.25513                       |
| 1157.161327                     | 5.550160023                | 34.56681307                      | 0.002379436            | 67.70554251                | 106402.8621                       |
| 753.2349802                     | 4.414648159                | 27.86928366                      | 0.012055552            | 24.27860677                | 17726.63492                       |
| 1190.81168                      | 4.520173363                | 34.84852424                      | 0.009648393            | 23.81971451                | 17755.43334                       |
| 374.0813177                     | 4.389721752                | 19.62660098                      | 0.008647649            | 16.64543586                | 5733.900845                       |
| 1511.51572                      | 5.637611653                | 39.32598203                      | 0.002184748            | 72.92605195                | 173283.849                        |
| 55.59292126                     | 3.00498358                 | 7.447189448                      | 0.058708668            | 1.993978773                | 87.74365301                       |
| 1992.496637                     | 5.522304898                | 45.0376398                       | 0.002533725            | 54.3101502                 | 76566.2461                        |
| 552.5293817                     | 4.632922336                | 24.00818801                      | 0.007902546            | 30.28576905                | 25225.86514                       |
| 594.8325882                     | 4.771733385                | 24.91200089                      | 0.006037105            | 33.64548433                | 30346.49848                       |
| 155.3777903                     | 3.735715041                | 12.47118962                      | 0.020936633            | 6.110038725                | 806.6455381                       |
| 303.6787886                     | 4.272208715                | 17.64430047                      | 0.015029065            | 17.37831727                | 12537.20977                       |
| 1877.33541                      | 5.410305863                | 43.83055416                      | 0.003015909            | 56.64832119                | 103787.8359                       |
| 998.7460489                     | 5.137559992                | 32.02457186                      | 0.00382247             | 38.59297697                | 41189.84683                       |
| 1593.289256                     | 5.045564083                | 40.23723919                      | 0.004843873            | 32.60519026                | 40135.48349                       |
| 1746.730752                     | 5.264524236                | 42.31856274                      | 0.002924351            | 47.18843616                | 65065.56982                       |
| 950.6251376                     | 5.485788247                | 31.22849822                      | 0.00291116             | 60.75909801                | 117075.5883                       |
| 341.0927987                     | 4.278769222                | 18.67050548                      | 0.009713706            | 13.51605622                | 6166.486893                       |
| 376.3036823                     | 4.572059526                | 19.69566531                      | 0.007613425            | 21.66312441                | 9307.354585                       |
| 184.4231092                     | 3.630864628                | 13.57801068                      | 0.023558141            | 5.035978732                | 492.6065357                       |
| 1856.047724                     | 5.644618234                | 43.55655331                      | 0.002770599            | 72.56378429                | 166624.3679                       |



| wavelet.LHH_glcm_SumAverage | wavelet.LHH_glcm_Imc2 | wavelet.LHH_glcm_Imc1 | wavelet.LHH_glcm_DifferenceAverage | wavelet.LHH_glcm_Id | wavelet.LHH_glcm_ClusterTendency | wavelet.LHH_firstrorder_InterquartileRange |
|-----------------------------|-----------------------|-----------------------|------------------------------------|---------------------|----------------------------------|--------------------------------------------|
| 68.0282114                  | 0.846425065           | -0.128199493          | 7.626764423                        | 0.22622874          | 141.3844164                      | 208.0841665                                |
| 81.8455427                  | 0.880308992           | -0.168320964          | 5.941236565                        | 0.265895373         | 78.94502248                      | 147.9212027                                |
| 63.62354925                 | 0.922591643           | -0.191883159          | 7.199215069                        | 0.255807747         | 172.5931758                      | 195.7474503                                |
| 26.85539098                 | 0.712301148           | -0.095456264          | 3.613146407                        | 0.35525857          | 23.58441938                      | 87.30202263                                |
| 78.79612935                 | 0.849975481           | -0.135251477          | 7.192330204                        | 0.246987882         | 126.2974669                      | 164.6236026                                |
| 63.36642948                 | 0.97009026            | -0.274384036          | 10.32434196                        | 0.175988758         | 175.5639345                      | 304.4311981                                |
| 98.37460495                 | 0.78323033            | -0.099117985          | 6.350991214                        | 0.264220369         | 157.9241665                      | 203.63355                                  |
| 46.74500783                 | 0.556306221           | -0.051733847          | 3.468081979                        | 0.373739536         | 25.24731922                      | 80.3941535                                 |
| 56.89234741                 | 0.675205086           | -0.074257268          | 5.102117061                        | 0.303992825         | 47.28214662                      | 114.4221322                                |
| 22.64977413                 | 0.625531373           | -0.068993453          | 3.461788232                        | 0.350195911         | 20.6921045                       | 96.25821856                                |
| 55.37483132                 | 0.864158144           | -0.163115703          | 5.314300593                        | 0.339304864         | 83.47236129                      | 112.4466416                                |
| 48.93872817                 | 0.683183652           | -0.078091545          | 4.616635284                        | 0.308406381         | 38.71147676                      | 116.2860776                                |
| 33.21765859                 | 0.697487761           | -0.096404289          | 3.126142997                        | 0.407677665         | 20.16989667                      | 64.14665927                                |
| 75.20816946                 | 0.892800831           | -0.175076248          | 6.68478075                         | 0.277017021         | 122.9932562                      | 133.5491474                                |
| 45.06473724                 | 0.693425295           | -0.084935039          | 4.163564114                        | 0.342249814         | 32.84289845                      | 90.62842795                                |
| 77.56313822                 | 0.825147108           | -0.121761214          | 6.750850518                        | 0.289380613         | 147.6856835                      | 158.0925986                                |
| 49.11255654                 | 0.884634412           | -0.159037812          | 7.112535257                        | 0.229605377         | 123.0429491                      | 221.2505044                                |
| 32.7036059                  | 0.684373328           | -0.088916023          | 3.144007422                        | 0.387148201         | 20.34912695                      | 76.45018189                                |
| 36.82197456                 | 0.739735235           | -0.098990121          | 4.644438884                        | 0.298983303         | 30.81804905                      | 115.9018839                                |
| 41.04598984                 | 0.572751191           | -0.051719656          | 4.257872669                        | 0.324775013         | 33.9618747                       | 105.8252897                                |
| 34.35111066                 | 0.683113115           | -0.08451802           | 3.737994013                        | 0.367424439         | 28.06205966                      | 81.62229488                                |
| 24.72339991                 | 0.684398673           | -0.082842484          | 3.984142798                        | 0.32271             | 27.98888267                      | 113.5921751                                |
| 34.48886386                 | 0.815819149           | -0.125478598          | 5.747210664                        | 0.2624739           | 54.12831766                      | 149.7287548                                |
| 51.75810638                 | 0.78261553            | -0.103030801          | 5.925933601                        | 0.265467432         | 102.204438                       | 168.1793335                                |
| 29.01549287                 | 0.637101275           | -0.075064668          | 3.224323442                        | 0.369526953         | 18.06676917                      | 84.62474001                                |
| 71.38859375                 | 0.879516597           | -0.153017144          | 7.809905469                        | 0.241062088         | 145.6789491                      | 177.3788506                                |
| 94.91596352                 | 0.844533593           | -0.124436108          | 7.656018388                        | 0.23363799          | 195.5173594                      | 231.1983186                                |
| 38.70114704                 | 0.637383764           | -0.070580362          | 3.76010283                         | 0.35313573          | 28.3608171                       | 87.87153517                                |
| 37.37963135                 | 0.936770705           | -0.233099879          | 6.758259104                        | 0.233137875         | 66.07013495                      | 191.2005134                                |
| 52.78240792                 | 0.856717481           | -0.137811196          | 7.12295047                         | 0.245837064         | 131.4419343                      | 181.2562709                                |
| 65.13908021                 | 0.723797251           | -0.09274453           | 4.827479346                        | 0.337857177         | 50.98667919                      | 89.84489451                                |
| 62.55010996                 | 0.851416865           | -0.132658933          | 6.789717491                        | 0.247439846         | 157.3294616                      | 223.9265894                                |
| 113.5708806                 | 0.868769899           | -0.1395699            | 7.162831215                        | 0.239358854         | 172.2835059                      | 236.741901                                 |
| 84.59371291                 | 0.852203383           | -0.131128123          | 7.511513449                        | 0.234233377         | 161.4795609                      | 216.0656052                                |
| 64.73956126                 | 0.729751178           | -0.084083779          | 6.518977907                        | 0.251979384         | 79.78214959                      | 158.898398                                 |
| 44.85651895                 | 0.5407579             | -0.051667476          | 2.878482384                        | 0.397848068         | 16.01447299                      | 72.38585163                                |
| 38.91760985                 | 0.615515321           | -0.065231639          | 3.898345859                        | 0.352523712         | 27.5180717                       | 90.22708696                                |
| 91.10492086                 | 0.807675303           | -0.113042565          | 6.194037571                        | 0.294860527         | 146.862831                       | 167.0900473                                |
| 49.93226876                 | 0.844998176           | -0.137246404          | 6.349763657                        | 0.250271519         | 86.85804231                      | 166.1174116                                |
| 87.49711816                 | 0.76957675            | -0.094827778          | 6.685901528                        | 0.26805061          | 157.2145099                      | 177.383654                                 |
| 38.67053143                 | 0.742525296           | -0.097909718          | 4.999214892                        | 0.315296239         | 48.02686751                      | 102.2381636                                |
| 35.17013194                 | 0.550231813           | -0.046531806          | 4.548064285                        | 0.299744823         | 31.30363133                      | 114.5189948                                |
| 38.96164568                 | 0.627256648           | -0.066533929          | 4.0519267                          | 0.339516944         | 30.84608094                      | 97.18832579                                |
| 82.53749985                 | 0.865249362           | -0.133819129          | 8.595049617                        | 0.208560697         | 207.5962909                      | 270.5824737                                |
| 45.7672749                  | 0.867083466           | -0.1472388            | 6.557893832                        | 0.248229837         | 110.3701575                      | 203.198445                                 |
| 83.56659566                 | 0.816130214           | -0.127183744          | 5.174907204                        | 0.322490368         | 92.23987751                      | 127.1739226                                |
| 81.16861248                 | 0.79623253            | -0.107809399          | 7.027728939                        | 0.260406319         | 113.6495253                      | 147.5937253                                |
| 38.86044114                 | 0.71203108            | -0.100684176          | 3.21890895                         | 0.370868915         | 19.66273118                      | 88.18228322                                |
| 32.94316953                 | 0.781067922           | -0.117816416          | 4.576838302                        | 0.301697798         | 32.73744379                      | 113.2858283                                |
| 26.88983562                 | 0.630294074           | -0.073845824          | 2.972269987                        | 0.395269101         | 16.43006446                      | 76.58090635                                |
| 72.64254281                 | 0.825701326           | -0.121133151          | 6.641154661                        | 0.255972478         | 125.3675522                      | 197.5573177                                |
| 54.38386363                 | 0.703775514           | -0.074444936          | 6.976970987                        | 0.231332349         | 81.3858371                       | 191.8778379                                |
| 31.07899523                 | 0.532360754           | -0.046226691          | 3.871198303                        | 0.337412008         | 25.58763002                      | 97.62445814                                |
| 60.62847688                 | 0.881151143           | -0.167593269          | 6.499118591                        | 0.257979011         | 81.41447945                      | 146.1907802                                |
| 41.15890193                 | 0.789605323           | -0.11929053           | 4.77622536                         | 0.312564388         | 43.82064772                      | 107.8313424                                |
| 52.04746003                 | 0.766599553           | -0.099351207          | 5.638771522                        | 0.268839014         | 69.07609224                      | 161.4371675                                |
| 89.87469652                 | 0.782915443           | -0.09957898           | 6.788257503                        | 0.257248904         | 132.4366255                      | 181.2476579                                |
| 100.5460162                 | 0.819204815           | -0.113246797          | 7.019784239                        | 0.242077509         | 177.1242727                      | 227.6720633                                |
| 61.72564786                 | 0.821538682           | -0.125975743          | 5.968963224                        | 0.266076664         | 78.42196084                      | 153.8855426                                |
| 72.77240965                 | 0.705874367           | -0.076635089          | 6.919124628                        | 0.264874106         | 94.88834586                      | 147.4232159                                |
| 69.83981105                 | 0.886031652           | -0.149410802          | 8.654970332                        | 0.203290323         | 202.2129855                      | 301.8459027                                |
| 31.19442775                 | 0.558300429           | -0.049712357          | 3.863832518                        | 0.336017811         | 23.94097315                      | 96.98675189                                |
| 96.55388724                 | 0.742960686           | -0.091054913          | 5.831264762                        | 0.29362612          | 110.3633844                      | 146.3393989                                |
| 91.34861401                 | 0.738843951           | -0.079462156          | 7.928153121                        | 0.222647081         | 183.8422965                      | 238.7984714                                |
| 21.03272527                 | 0.632004589           | -0.081337681          | 2.624588883                        | 0.410962227         | 11.9066085                       | 67.98234657                                |
| 58.92038733                 | 0.785763177           | -0.105218686          | 6.68400458                         | 0.268471825         | 85.49243055                      | 144.3721028                                |
| 52.98983198                 | 0.855362676           | -0.139680272          | 6.615365608                        | 0.246226426         | 106.7506185                      | 192.0954115                                |
| 98.48886629                 | 0.777229876           | -0.091317204          | 8.322912525                        | 0.218800788         | 208.6174452                      | 238.6537659                                |
| 67.17836999                 | 0.728889393           | -0.085135813          | 6.273447981                        | 0.268158694         | 75.59623523                      | 142.370329                                 |
| 44.22341749                 | 0.717477823           | -0.079975435          | 5.65454373                         | 0.269327051         | 82.92350378                      | 172.9412477                                |
| 49.4743885                  | 0.765902548           | -0.106598493          | 4.844637414                        | 0.303843222         | 41.55241401                      | 110.3977371                                |
| 48.18931542                 | 0.725067492           | -0.081689854          | 6.656902937                        | 0.255679716         | 83.55793267                      | 160.8734673                                |
| 43.13922102                 | 0.673291887           | -0.082662207          | 3.575016853                        | 0.374211123         | 26.73513231                      | 81.94587778                                |
| 85.89072915                 | 0.834332493           | -0.120983205          | 7.418193908                        | 0.222629797         | 148.5940594                      | 223.3823903                                |
| 70.01551461                 | 0.834475166           | -0.128414561          | 6.32483918                         | 0.288810989         | 123.8565442                      | 150.884312                                 |
| 80.71854344                 | 0.893202502           | -0.165938211          | 7.242419611                        | 0.247729753         | 131.580062                       | 188.7463609                                |
| 75.06845701                 | 0.944358166           | -0.204938462          | 9.696765469                        | 0.206344509         | 378.9534211                      | 720.7225835                                |
| 31.14366828                 | 0.732133424           | -0.106213415          | 3.514374479                        | 0.367723112         | 21.80486823                      | 79.49041569                                |
| 44.29329622                 | 0.779588479           | -0.109622918          | 5.297308728                        | 0.28528716          | 53.42321011                      | 134.4796744                                |
| 87.65318967                 | 0.791906032           | -0.103920132          | 6.620775656                        | 0.243257242         | 114.5660761                      | 202.0383942                                |
| 67.76235102                 | 0.869218315           | -0.141748886          | 7.919638692                        | 0.222915107         | 153.0379002                      | 209.7467992                                |
| 54.97721941                 | 0.816098259           | -0.137367904          | 4.629782998                        | 0.343764116         | 43.03282736                      | 88.42411979                                |
| 69.07063678                 | 0.746581699           | -0.102612626          | 4.670914373                        | 0.33647189          | 43.65246689                      | 91.93899264                                |
| 38.74375959                 | 0.677726636           | -0.079911571          | 4.223755774                        | 0.335720191         | 31.4456703                       | 102.4566852                                |
| 77.34234054                 | 0.855306092           | -0.135646452          | 7.246599137                        | 0.24570656          | 176.9529598                      | 241.8552576                                |
| 14.8943789                  | 0.397006554           | -0.040112489          | 1.392410749                        | 0.550608526         | 4.251133969                      | 35.66547173                                |
| 88.95640657                 | 0.81579003            | -0.114257728          | 6.62661051                         | 0.247369346         | 137.736711                       | 197.1420414                                |
| 47.11365459                 | 0.788184904           | -0.116966451          | 5.389297169                        | 0.303724256         | 55.02695546                      | 112.6599778                                |
| 48.8690818                  | 0.851975058           | -0.148599152          | 5.86834161                         | 0.279460938         | 63.08549169                      | 132.9449923                                |
| 24.93896111                 | 0.520685774           | -0.050409639          | 2.538975123                        | 0.42260909          | 11.96246495                      | 65.04100702                                |
| 34.8410213                  | 0.799817236           | -0.13627503           | 3.784539537                        | 0.380426503         | 35.85824321                      | 76.90686552                                |
| 86.47732912                 | 0.840324657           | -0.12910791           | 6.775638082                        | 0.255036138         | 130.1493325                      | 181.3588522                                |
| 63.07240867                 | 0.677706779           | -0.06791427           | 5.945436167                        | 0.269918903         | 85.58596199                      | 155.8501265                                |
| 79.69190926                 | 0.719903283           | -0.084550023          | 4.979244022                        | 0.306335897         | 76.52702107                      | 133.609205                                 |
| 83.46174438                 | 0.745853701           | -0.087286251          | 6.693716624                        | 0.242858209         | 105.7116206                      | 183.4585909                                |
| 61.23961964                 | 0.805368661           | -0.107246603          | 7.095519453                        | 0.243690661         | 147.7229193                      | 188.3280804                                |
| 36.9548536                  | 0.613558482           | -0.06424714           | 3.812556859                        | 0.3435269           | 27.00816562                      | 94.54389759                                |
| 38.85979089                 | 0.79607823            | -0.123070058          | 4.849839364                        | 0.309459056         | 41.03617794                      | 113.3579152                                |
| 27.15602136                 | 0.579457764           | -0.067244937          | 2.310972238                        | 0.436660141         | 10.19155427                      | 63.58537232                                |
| 85.82138122                 | 0.80686167            | -0.108278967          | 7.191599931                        | 0.260819737         | 176.4404185                      | 187.9611881                                |

| wavelet.LHH_firstorder_Skewness | wavelet.LHH_firstorder_Uniformity | wavelet.LHH_firstorder_MeanAbsoluteDeviation | wavelet.LHH_firstorder_Energy | wavelet.LHH_firstorder_RobustMeanAbsoluteDeviation |
|---------------------------------|-----------------------------------|----------------------------------------------|-------------------------------|----------------------------------------------------|
| 0.235033228                     | 0.042521193                       | 143.4605709                                  | 81703895.36                   | 88.87649637                                        |
| -0.187060634                    | 0.058866996                       | 108.9911029                                  | 24051758.81                   | 64.07569321                                        |
| -0.020224536                    | 0.04359082                        | 147.2380541                                  | 63998758.82                   | 87.98806373                                        |
| 0.216378015                     | 0.098133215                       | 62.55603784                                  | 7287624.069                   | 37.91038023                                        |
| 0.406165698                     | 0.051619425                       | 126.0887068                                  | 79535564.97                   | 72.11178061                                        |
| 0.111587821                     | 0.031822773                       | 185.1954599                                  | 37322504.35                   | 126.1990268                                        |
| -0.122566115                    | 0.044239801                       | 136.7368095                                  | 200291635.5                   | 85.43882581                                        |
| -0.152035761                    | 0.104132262                       | 61.02232842                                  | 39841238.57                   | 35.45236111                                        |
| 0.408897226                     | 0.075365686                       | 83.15869973                                  | 64694604.38                   | 48.96504004                                        |
| 0.179936698                     | 0.092329862                       | 62.34378316                                  | 7189069.651                   | 40.84435206                                        |
| -0.216499571                    | 0.07814116                        | 93.01098584                                  | 33387718.37                   | 48.23288001                                        |
| -0.026901579                    | 0.076524579                       | 79.77930683                                  | 28744168.76                   | 48.75508995                                        |
| 0.434841896                     | 0.129109338                       | 52.18004043                                  | 11999936.33                   | 28.06091177                                        |
| 0.135040755                     | 0.062846474                       | 116.7981539                                  | 60347933.57                   | 58.60343733                                        |
| 0.107877137                     | 0.092666737                       | 68.64502506                                  | 19848708.88                   | 39.29471843                                        |
| -0.48781231                     | 0.053709322                       | 127.4456026                                  | 166744888.1                   | 68.77803795                                        |
| 0.124291387                     | 0.042090688                       | 139.7377944                                  | 39515198.82                   | 92.48231262                                        |
| -0.306909734                    | 0.112971284                       | 55.97086732                                  | 7933063.11                    | 32.73506879                                        |
| 0.220489979                     | 0.079555842                       | 75.98366805                                  | 13791040.39                   | 47.73761709                                        |
| 0.432455897                     | 0.082714466                       | 73.25421777                                  | 53654255.53                   | 45.06205969                                        |
| 0.082443641                     | 0.10061046                        | 65.32539955                                  | 27371850.83                   | 36.81050512                                        |
| 0.207867226                     | 0.080848381                       | 71.68622172                                  | 9336547.483                   | 47.96988368                                        |
| 0.272708574                     | 0.061201096                       | 97.10584357                                  | 17349077.21                   | 62.29603278                                        |
| 0.279049084                     | 0.051315979                       | 117.2092135                                  | 66519189.64                   | 73.86373949                                        |
| 0.153359489                     | 0.105221813                       | 55.96766048                                  | 7326308.361                   | 35.6520196                                         |
| 0.304002842                     | 0.047792464                       | 139.0062684                                  | 98232977.37                   | 77.92768813                                        |
| -0.377238758                    | 0.038795808                       | 157.7830695                                  | 156998023.7                   | 97.26416338                                        |
| 0.209119086                     | 0.096958254                       | 64.27380306                                  | 23155285.15                   | 38.43126797                                        |
| 0.004943773                     | 0.051624301                       | 115.62392                                    | 9885833.332                   | 77.77319477                                        |
| 0.249693373                     | 0.04793601                        | 132.0066525                                  | 69857387.36                   | 78.47010868                                        |
| 0.662727578                     | 0.090526325                       | 78.05702999                                  | 73523831.74                   | 40.36809468                                        |
| 0.385413837                     | 0.041085452                       | 144.9604054                                  | 76786904.89                   | 93.56096513                                        |
| 0.027355877                     | 0.038106675                       | 162.1791236                                  | 169646243.6                   | 99.91258965                                        |
| -0.338771415                    | 0.041742327                       | 146.3012721                                  | 96478974.55                   | 90.93770133                                        |
| 0.01969703                      | 0.054273796                       | 112.9030694                                  | 107691717.3                   | 68.68964853                                        |
| -0.192733019                    | 0.118503767                       | 50.64273762                                  | 14740798.9                    | 31.33688989                                        |
| 0.263202043                     | 0.095387416                       | 65.4354246                                   | 31993354.55                   | 38.7842358                                         |
| -0.484341395                    | 0.052767952                       | 125.6851605                                  | 180636563.5                   | 70.97033612                                        |
| 0.538895884                     | 0.053083482                       | 115.267092                                   | 31250374.88                   | 71.42802722                                        |
| 0.410197625                     | 0.048687054                       | 134.1813279                                  | 298285195.6                   | 76.37838975                                        |
| 0.375538333                     | 0.080073285                       | 81.65743812                                  | 36998444.16                   | 45.60432064                                        |
| 0.020881007                     | 0.077299387                       | 75.66544348                                  | 39012713.51                   | 48.76284291                                        |
| 0.386388015                     | 0.089276265                       | 68.51764588                                  | 34344436.4                    | 41.44618269                                        |
| -0.244440582                    | 0.03415494                        | 173.311769                                   | 129859995.6                   | 113.0996891                                        |
| 0.163018193                     | 0.045280551                       | 129.3100149                                  | 38295410.3                    | 85.3427856                                         |
| -0.937692153                    | 0.068388492                       | 98.30799033                                  | 66410281.12                   | 54.0608646                                         |
| 0.329502838                     | 0.05412101                        | 123.1644288                                  | 156858447.2                   | 67.03828437                                        |
| 0.565813205                     | 0.106317744                       | 58.18974512                                  | 6131826.849                   | 36.06215521                                        |
| 0.413590002                     | 0.078034965                       | 76.72256079                                  | 9317855.089                   | 48.07934344                                        |
| -0.041483137                    | 0.113067207                       | 52.9574915                                   | 7072476.403                   | 32.92844843                                        |
| 0.180428455                     | 0.045913632                       | 131.9467275                                  | 85179966.45                   | 84.25106455                                        |
| 0.125645332                     | 0.047453189                       | 121.8446378                                  | 84736979.34                   | 80.71896869                                        |
| 0.252498195                     | 0.090484968                       | 65.5105918                                   | 35408865.81                   | 41.12430495                                        |
| 0.441723056                     | 0.058571597                       | 109.6400916                                  | 28094656.25                   | 63.14639344                                        |
| 0.803552649                     | 0.080324495                       | 78.59928073                                  | 17651188.07                   | 46.1905444                                         |
| -0.008319242                    | 0.055983695                       | 106.9571595                                  | 40069204.48                   | 68.53209968                                        |
| -0.288528227                    | 0.047827515                       | 129.7757229                                  | 135778172.7                   | 78.75665516                                        |
| -0.22231449                     | 0.039547695                       | 150.423898                                   | 144561922.8                   | 96.3477931                                         |
| 0.156021052                     | 0.058373934                       | 106.0029167                                  | 36759800.48                   | 63.76304698                                        |
| 0.323973725                     | 0.057691258                       | 113.7121974                                  | 252300433                     | 64.81207483                                        |
| -0.09066009                     | 0.03202559                        | 177.8221647                                  | 89652754.67                   | 124.2362409                                        |
| 0.233100963                     | 0.090293594                       | 65.29060918                                  | 20602956.37                   | 41.3310747                                         |
| -0.560095223                    | 0.060044035                       | 111.5627324                                  | 181554175                     | 62.13721999                                        |
| -0.064024082                    | 0.037465603                       | 158.1370767                                  | 34532552.5                    | 100.9208159                                        |
| 0.345610427                     | 0.134090691                       | 45.0879645                                   | 2980652.687                   | 28.28395984                                        |
| 0.469126625                     | 0.058434558                       | 113.5699345                                  | 105824444.2                   | 63.95078758                                        |
| 0.229804159                     | 0.047801244                       | 124.6140124                                  | 36142868.75                   | 79.98513785                                        |
| -0.041335508                    | 0.036715213                       | 165.4769408                                  | 326654940.4                   | 102.552619                                         |
| 0.201486015                     | 0.059739278                       | 105.7289447                                  | 135006701.1                   | 62.19247731                                        |
| 0.157552503                     | 0.053206062                       | 110.0284482                                  | 60892074.26                   | 72.36511234                                        |
| 0.377492226                     | 0.077786489                       | 81.23423063                                  | 16963432.41                   | 48.98432035                                        |
| 0.327795639                     | 0.053556544                       | 115.0270389                                  | 109097217.2                   | 69.67859926                                        |
| 0.153537936                     | 0.105676512                       | 60.94581146                                  | 18339886.31                   | 34.90463327                                        |
| 0.237354859                     | 0.040215901                       | 147.480732                                   | 88951509.79                   | 94.67318748                                        |
| 0.155294323                     | 0.056343357                       | 118.580441                                   | 98844530.26                   | 65.62218451                                        |
| -0.356354819                    | 0.046322969                       | 135.6040351                                  | 47388884.49                   | 81.75754973                                        |
| 0.462648703                     | 0.031427588                       | 205.6794197                                  | 203781790.2                   | 118.5819219                                        |
| 0.410351726                     | 0.105824591                       | 58.7551393                                   | 6693355.506                   | 35.03948798                                        |
| 0.189091403                     | 0.066038769                       | 91.33008179                                  | 27278939.14                   | 56.83171265                                        |
| -0.044579511                    | 0.045665986                       | 127.9232868                                  | 67022981.72                   | 84.81279557                                        |
| 0.225339248                     | 0.041930214                       | 146.7398185                                  | 80596600.36                   | 90.26907903                                        |
| 0.358754631                     | 0.093108672                       | 78.7615271                                   | 28625016.19                   | 39.56078617                                        |
| 0.299844298                     | 0.089942591                       | 75.36960403                                  | 43536180.9                    | 40.8379273                                         |
| 0.292672013                     | 0.08352277                        | 72.34107291                                  | 30585423.25                   | 44.36428704                                        |
| 0.217736475                     | 0.039592208                       | 152.3203787                                  | 105554995.9                   | 98.77279769                                        |
| -0.217062615                    | 0.230258404                       | 25.30179886                                  | 1875195.874                   | 15.49003411                                        |
| -0.088460186                    | 0.044746648                       | 133.1582743                                  | 76834837.63                   | 84.15185701                                        |
| 0.663895372                     | 0.074235718                       | 90.52138454                                  | 49718399.05                   | 49.52200325                                        |
| 0.443854938                     | 0.065361014                       | 99.69988476                                  | 31546754.38                   | 56.50708678                                        |
| 0.034259944                     | 0.132317635                       | 45.61000713                                  | 8073887.871                   | 28.09710374                                        |
| 0.739948482                     | 0.107825379                       | 66.27781559                                  | 14095628.54                   | 34.06811404                                        |
| 0.126217851                     | 0.049191001                       | 126.6496259                                  | 79009826.15                   | 76.39135305                                        |
| 0.194086641                     | 0.055049402                       | 111.093055                                   | 123470496.2                   | 67.82920083                                        |
| -0.046808453                    | 0.065970248                       | 93.73843478                                  | 60996012.5                    | 56.65283003                                        |
| 0.046951577                     | 0.047981764                       | 125.0722931                                  | 127232353.8                   | 78.42734919                                        |
| 0.043460897                     | 0.045296857                       | 138.9886031                                  | 129180828.7                   | 83.23327997                                        |
| 0.776755556                     | 0.092431229                       | 66.34204972                                  | 24977793.97                   | 40.28734661                                        |
| 0.217781208                     | 0.079016866                       | 81.44930846                                  | 13821981.4                    | 48.72116655                                        |
| -0.015707562                    | 0.139465406                       | 42.29733957                                  | 2804018.055                   | 26.19268249                                        |
| 0.132593282                     | 0.044740592                       | 144.7818045                                  | 255423673.6                   | 83.82815577                                        |

| wavelet.LHH_firstorder_Median | wavelet.LHH_firstorder_TotalEnergy | wavelet.LHH_firstorder_Maximum | wavelet.LHH_firstorder_RootMeanSquared | wavelet.LHH_firstorder_90Percentile | wavelet.LHH_firstorder_Minimum |
|-------------------------------|------------------------------------|--------------------------------|----------------------------------------|-------------------------------------|--------------------------------|
| 9.315870591                   | 2206005175                         | 970.6554807                    | 196.2224489                            | 240.2424181                         | -806.5615072                   |
| -8.575875634                  | 649397488                          | 850.4096266                    | 160.3864278                            | 148.8375496                         | -1019.434726                   |
| 5.860329629                   | 1727966488                         | 809.6032466                    | 204.2551878                            | 247.8633901                         | -762.0847227                   |
| -2.995739809                  | 196765849.9                        | 368.818452                     | 86.36657531                            | 93.00814156                         | -307.6952736                   |
| -5.235260465                  | 2147460254                         | 840.9195534                    | 183.2693486                            | 200.5774081                         | -960.6175362                   |
| 5.541266096                   | 1007707617                         | 703.4721985                    | 237.80086                              | 317.6215209                         | -759.1922593                   |
| 10.10780357                   | 5407874157                         | 969.0995959                    | 188.2646371                            | 237.6341209                         | -1178.887695                   |
| -2.591072889                  | 1075713441                         | 545.3079184                    | 88.3163214                             | 84.68021884                         | -554.829909                    |
| -1.700962397                  | 1746754318                         | 657.4662296                    | 119.2941961                            | 128.4351388                         | -677.7896199                   |
| -6.267194733                  | 194104880.6                        | 290.6036129                    | 81.89152392                            | 96.97439915                         | -254.4256328                   |
| 13.14423459                   | 901468395.9                        | 810.7328899                    | 148.7964946                            | 129.1714988                         | -671.4817816                   |
| -0.223772381                  | 776092556.4                        | 659.6756896                    | 111.6707446                            | 115.8439664                         | -585.1659958                   |
| 0.389624233                   | 323998280.9                        | 462.496751                     | 80.17100206                            | 70.5989670                          | -394.3472395                   |
| 5.134541106                   | 1629394206                         | 1113.575136                    | 187.4761621                            | 172.4534094                         | -924.8114089                   |
| 0.405732643                   | 535915139.6                        | 545.5597836                    | 100.0219454                            | 107.250211                          | -541.2505024                   |
| 14.01689042                   | 4502111978                         | 939.8833458                    | 195.2035033                            | 197.8060205                         | -946.3868901                   |
| 10.3610812                    | 1066910368                         | 732.2756753                    | 181.9197801                            | 219.4517674                         | -579.901498                    |
| -0.92872466                   | 214192704                          | 363.0091503                    | 80.2119208                             | 73.19818382                         | -397.6504643                   |
| -4.179484631                  | 372358090.6                        | 473.2716529                    | 103.0768573                            | 118.2140897                         | -432.4012355                   |
| -0.093533661                  | 1448664899                         | 589.3121208                    | 101.5879456                            | 112.1263053                         | -479.0446165                   |
| -3.63969727                   | 739039972.4                        | 549.7834788                    | 95.13957101                            | 98.46631016                         | -414.6665525                   |
| -1.814655366                  | 252086782.1                        | 418.1840343                    | 93.02130604                            | 107.4415178                         | -298.7822511                   |
| -1.610860706                  | 468425084.6                        | 594.4883056                    | 130.1631984                            | 141.3252826                         | -412.6707259                   |
| 9.58824992                    | 1796018120                         | 712.700335                     | 158.524541                             | 200.9703075                         | -622.4076021                   |
| -1.989462658                  | 197810325.8                        | 363.7161418                    | 75.86271742                            | 86.55261514                         | -333.0453335                   |
| 5.459694753                   | 2652290389                         | 1016.531269                    | 203.6320453                            | 228.8386404                         | -855.2523595                   |
| -2.080741418                  | 4238946639                         | 1095.638468                    | 220.3658233                            | 247.8055123                         | -1173.756961                   |
| -3.053858609                  | 625192699.1                        | 557.350157                     | 91.56156974                            | 96.83208238                         | -453.8365542                   |
| 0.772444602                   | 266917500                          | 463.8018843                    | 148.7143512                            | 180.9548995                         | -441.5458024                   |
| -5.657479976                  | 1886149459                         | 855.4149249                    | 184.4191219                            | 209.3941739                         | -632.0189368                   |
| -0.69500839                   | 1985143457                         | 933.0023797                    | 124.3087924                            | 117.1761564                         | -796.0131507                   |
| -12.90786519                  | 2073246432                         | 716.7526978                    | 192.6474815                            | 240.1358606                         | -772.0798343                   |
| 1.62043315                    | 4580448576                         | 1552.685483                    | 229.2123962                            | 248.280978                          | -1386.380982                   |
| 21.14737435                   | 2604932313                         | 776.7575305                    | 202.6200454                            | 262.0451737                         | -1006.155009                   |
| -2.925600049                  | 2907676367                         | 723.0967895                    | 156.3750624                            | 183.5822993                         | -790.2046957                   |
| 0.514771402                   | 398001570.4                        | 369.2855973                    | 70.1087587                             | 76.29444569                         | -533.5253347                   |
| 1.113292548                   | 863820573                          | 477.7359775                    | 92.72568589                            | 99.64072965                         | -472.7493627                   |
| 7.099376037                   | 4877187213                         | 1001.055578                    | 187.083679                             | 193.6356963                         | -1114.294178                   |
| -15.86709995                  | 843760121.6                        | 770.7086829                    | 159.3951343                            | 169.754265                          | -611.4216085                   |
| 12.56299657                   | 8053700281                         | 1922.057714                    | 202.5576473                            | 200.9422825                         | -1073.842104                   |
| -3.68800286                   | 998957992.3                        | 558.1764875                    | 119.428161                             | 125.0676108                         | -455.9588801                   |
| -2.749850037                  | 1053343265                         | 407.1923403                    | 100.4421484                            | 125.562625                          | -423.7344628                   |
| -0.250985066                  | 927299782.7                        | 543.3013773                    | 96.96240095                            | 101.9428351                         | -456.6271961                   |
| 29.98800195                   | 3506219882                         | 834.1740515                    | 228.4612265                            | 281.5040119                         | -990.914438                    |
| -27.95419749                  | 1033976078                         | 731.8739868                    | 173.1043321                            | 167.3410762                         | -585.3140446                   |
| 8.800818452                   | 1793077590                         | 850.8389139                    | 155.5415724                            | 151.9452281                         | -1002.096844                   |
| 0.960171518                   | 4235178075                         | 1272.902778                    | 185.4284275                            | 198.7466771                         | -995.8935488                   |
| -0.784510965                  | 26559324.9                         | 517.6674995                    | 83.90461788                            | 91.45058525                         | -469.950618                    |
| 1.344759828                   | 151582087.4                        | 569.9125438                    | 104.6389073                            | 121.5099138                         | -375.5901357                   |
| -2.968244221                  | 190956862.9                        | 310.990612                     | 72.32649307                            | 80.96653042                         | -309.4901046                   |
| 13.8489562                    | 2299859094                         | 951.7208204                    | 182.090245                             | 221.1141429                         | -864.0179792                   |
| -10.59742768                  | 2287898442                         | 597.4475647                    | 158.5466657                            | 195.4751854                         | -665.4033948                   |
| -4.317968577                  | 956039376.8                        | 458.0800073                    | 88.58729943                            | 100.7958438                         | -362.7440575                   |
| -2.650254174                  | 758555718.7                        | 899.7256552                    | 159.5244752                            | 167.0236741                         | -733.2184732                   |
| -2.881874696                  | 476582077.8                        | 850.432165                     | 115.2023002                            | 116.2489923                         | -499.8255252                   |
| -11.15766187                  | 1081868521                         | 513.4052452                    | 143.3468172                            | 144.1895298                         | -630.3193146                   |
| 15.61114893                   | 3666010663                         | 894.0306914                    | 183.2127599                            | 216.7872461                         | -1090.201013                   |
| 17.0972582                    | 3903171916                         | 1016.338554                    | 204.4628752                            | 271.9498393                         | -1203.792942                   |
| 4.982571221                   | 992514613                          | 697.3806658                    | 149.350943                             | 168.9204726                         | -731.2726761                   |
| -0.843607609                  | 6812111690                         | 1010.250769                    | 166.2445414                            | 181.8874371                         | -882.9363782                   |
| 26.28877419                   | 2420624376                         | 665.4049478                    | 225.3131138                            | 317.3480497                         | -807.7522914                   |
| -2.01148084                   | 556279821.9                        | 523.9959515                    | 87.84340077                            | 107.2248707                         | -351.2066588                   |
| 18.38813457                   | 4901962725                         | 1017.965601                    | 177.0929798                            | 185.2506965                         | -1150.904518                   |
| 2.699873927                   | 9323789918                         | 939.1437395                    | 212.8390921                            | 248.6805969                         | -1103.699584                   |
| -2.654699075                  | 80477622.56                        | 274.4669222                    | 61.42457232                            | 71.14101505                         | -235.868637                    |
| -1.847232464                  | 2857259993                         | 939.7265719                    | 165.533868                             | 189.0971363                         | -708.5656277                   |
| 6.138127245                   | 975857456.3                        | 758.2219616                    | 166.4840049                            | 196.6249477                         | -633.0151209                   |
| 23.42172178                   | 8819683392                         | 1557.840199                    | 228.6149393                            | 271.0283858                         | -1196.18585                    |
| -1.727089856                  | 3645180931                         | 897.3855859                    | 151.8238677                            | 172.8994585                         | -801.6066426                   |
| -6.747168979                  | 1644086005                         | 593.9989075                    | 144.9543302                            | 157.5445671                         | -535.3889119                   |
| 0.835446426                   | 458012675.1                        | 581.1185017                    | 114.2752791                            | 133.7949148                         | -588.8779356                   |
| -7.956758503                  | 2945624865                         | 854.1197898                    | 159.4697049                            | 175.058851                          | -582.7720414                   |
| 0.458917479                   | 495176930.3                        | 625.1696357                    | 89.7069636                             | 98.0278459                          | -509.547304                    |
| -14.56541126                  | 2401690764                         | 1018.187564                    | 198.4351238                            | 219.9067766                         | -1073.671479                   |
| 8.165506222                   | 2668802317                         | 914.3017392                    | 177.6784624                            | 194.6517917                         | -847.8352868                   |
| 3.243122596                   | 1279499881                         | 672.519608                     | 187.9152322                            | 206.7654489                         | -975.146378                    |
| 6.396290714                   | 5502108336                         | 1256.702399                    | 291.6347556                            | 344.6620255                         | -883.1478243                   |
| -4.305263619                  | 180720598.7                        | 466.4735354                    | 83.58708725                            | 89.428634                           | -372.7165722                   |
| -8.214022569                  | 736531356.8                        | 659.9517344                    | 126.4145252                            | 131.5111835                         | -530.5727656                   |
| 10.52072493                   | 1809620506                         | 868.0615894                    | 169.2765353                            | 208.1246472                         | -1054.142812                   |
| 5.344756252                   | 2176108210                         | 970.6554807                    | 201.2986999                            | 244.8241113                         | -806.5615072                   |
| -1.326931435                  | 772875437.1                        | 987.1472373                    | 126.141296                             | 115.8197886                         | -660.7465516                   |
| -1.893607034                  | 1175476884                         | 746.0505063                    | 115.4031609                            | 118.0317708                         | -827.5995749                   |
| -2.341321321                  | 825806427.8                        | 450.4258839                    | 99.76448552                            | 113.5906707                         | -452.4685412                   |
| -9.028758259                  | 2849984890                         | 1026.697064                    | 208.0336057                            | 245.1762811                         | -931.3884271                   |
| -0.376925401                  | 50630288.6                         | 182.7961638                    | 34.9859714                             | 37.89662647                         | -160.0187457                   |
| 2.178961054                   | 2074540616                         | 794.0242876                    | 179.4877846                            | 215.5238364                         | -1085.367836                   |
| -1.788076422                  | 1342396774                         | 789.7125933                    | 134.6557312                            | 142.3126338                         | -559.3795365                   |
| 0.318557995                   | 851762368.3                        | 775.79254                      | 146.7934927                            | 160.1164177                         | -589.1193525                   |
| -0.038015248                  | 217994972.5                        | 357.3012034                    | 63.14352794                            | 67.2357366                          | -289.2965401                   |
| -0.346197182                  | 380581970.7                        | 681.2384502                    | 103.9688948                            | 91.16471723                         | -416.0416868                   |
| 14.85272877                   | 2133265306                         | 1036.442263                    | 182.125046                             | 209.6162351                         | -1049.891518                   |
| 0.717579333                   | 3333703397                         | 786.6319124                    | 154.344441                             | 171.6001118                         | -765.1734499                   |
| 5.007877899                   | 1646892338                         | 893.3038817                    | 135.9545518                            | 151.741488                          | -960.1298303                   |
| 8.051939495                   | 3435027852                         | 834.7662702                    | 170.9774383                            | 203.3984831                         | -1004.13454                    |
| -1.984192236                  | 3487882376                         | 816.5153587                    | 194.2938395                            | 242.6262274                         | -745.731691                    |
| -0.796043451                  | 674400437.1                        | 594.5583346                    | 94.16372189                            | 106.9386997                         | -446.5331237                   |
| -4.362326838                  | 373193497.8                        | 597.8065031                    | 114.897826                             | 130.4762801                         | -460.3160756                   |
| 0.292860065                   | 75708487.5                         | 220.6137973                    | 57.98389398                            | 69.17194463                         | -324.7252789                   |
| 11.85221725                   | 6896439187                         | 1083.153233                    | 210.3256228                            | 241.4390452                         | -1035.837691                   |

| wavelet.LHH_firstorder_Entropy | wavelet.LHH_firstorder_StandardDeviation | wavelet.LHH_firstorder_Range | wavelet.LHH_firstorder_Variance | wavelet.LHH_firstorder_10Percentile | wavelet.LHH_firstorder_Kurtosis |
|--------------------------------|------------------------------------------|------------------------------|---------------------------------|-------------------------------------|---------------------------------|
| 4.93070026                     | 195.817539                               | 1777.216988                  | 38344.50858                     | -210.8820562                        | 4.713237325                     |
| 4.493746446                    | 159.8575156                              | 1869.844352                  | 25554.42529                     | -188.94244                          | 9.439605398                     |
| 4.952637415                    | 204.0936215                              | 1571.687969                  | 41654.20632                     | -238.0950773                        | 4.373377349                     |
| 3.747010304                    | 86.32422858                              | 676.5137257                  | 7451.87244                      | -104.6414583                        | 4.73921915                      |
| 4.744115034                    | 183.2691398                              | 1801.53709                   | 33587.57759                     | -194.8972216                        | 6.283192479                     |
| 5.222180477                    | 237.3818909                              | 1462.664458                  | 56350.16212                     | -284.2176438                        | 3.259460276                     |
| 4.874956856                    | 187.6357658                              | 2147.987291                  | 35207.18062                     | -195.7688895                        | 5.531295221                     |
| 3.724819958                    | 88.1245915                               | 1100.137827                  | 7765.943627                     | -107.2521258                        | 6.676459561                     |
| 4.170021369                    | 119.2941825                              | 1335.25585                   | 14231.10199                     | -127.7468236                        | 6.411809852                     |
| 3.7328292                      | 81.70059624                              | 545.0292456                  | 6674.987426                     | -108.7341033                        | 3.651366523                     |
| 4.213763704                    | 148.7055567                              | 1482.214671                  | 22113.34259                     | -130.9139175                        | 8.900199009                     |
| 4.102249228                    | 111.6461345                              | 1244.841685                  | 12464.85934                     | -126.4597404                        | 5.981630389                     |
| 3.459922757                    | 80.17015359                              | 856.8439905                  | 6427.253527                     | -80.29805945                        | 8.047417985                     |
| 4.575453864                    | 187.4251819                              | 2038.386545                  | 35128.19882                     | -172.8128199                        | 9.24020076                      |
| 3.889362879                    | 100.0215456                              | 1086.810286                  | 10004.30958                     | -104.1230337                        | 6.793708379                     |
| 4.735712807                    | 195.0332028                              | 1886.270236                  | 38037.95018                     | -181.5639005                        | 7.64058325                      |
| 4.851172231                    | 181.7312399                              | 1312.177173                  | 33026.24355                     | -217.1199089                        | 3.87733493                      |
| 3.582670068                    | 79.97711668                              | 760.6596146                  | 6396.339192                     | -98.93759565                        | 6.058962057                     |
| 4.016582707                    | 103.0759262                              | 905.6728884                  | 10624.64655                     | -119.1986771                        | 4.691553083                     |
| 3.981178376                    | 101.5690342                              | 1068.356737                  | 10316.2687                      | -111.5083457                        | 5.699085696                     |
| 3.813127352                    | 95.00001417                              | 964.4500313                  | 9025.002693                     | -114.340111                         | 5.939367458                     |
| 3.912819263                    | 92.95886399                              | 716.9662853                  | 8641.350394                     | -118.2316211                        | 3.94869787                      |
| 4.356066443                    | 130.045912                               | 1007.159032                  | 16911.93924                     | -162.638526                         | 4.570183072                     |
| 4.643671268                    | 158.03441                                | 1335.107937                  | 24974.87473                     | -183.1920082                        | 4.870634144                     |
| 3.588199928                    | 75.85890502                              | 696.7614752                  | 5754.573471                     | -87.38762595                        | 5.331275821                     |
| 4.883592564                    | 203.3767369                              | 1871.783628                  | 41362.09713                     | -210.4709423                        | 5.895130474                     |
| 5.067514539                    | 220.3518921                              | 2269.39543                   | 48554.95633                     | -240.6984896                        | 6.174687182                     |
| 3.794101287                    | 91.54264469                              | 1011.186711                  | 8380.055798                     | -105.2845967                        | 6.843956129                     |
| 4.54898893                     | 148.5534482                              | 905.3476867                  | 22068.12697                     | -184.7136324                        | 3.484921511                     |
| 4.804382799                    | 184.4040671                              | 1487.433862                  | 34004.85998                     | -215.4507196                        | 4.97651959                      |
| 4.043947497                    | 124.2965171                              | 1729.01553                   | 15449.62417                     | -116.581321                         | 10.64871549                     |
| 4.926577989                    | 192.6254736                              | 1488.832532                  | 37104.57308                     | -230.0407996                        | 3.973507982                     |
| 5.097633745                    | 229.1133509                              | 2939.066465                  | 52492.92756                     | -233.6650328                        | 5.98287961                      |
| 4.95970698                     | 201.7670553                              | 1782.912539                  | 40709.94462                     | -201.0712426                        | 5.302450503                     |
| 4.607175497                    | 156.3700988                              | 1513.301485                  | 24451.60781                     | -181.9637541                        | 5.008435201                     |
| 3.45941033                     | 70.09601758                              | 902.810932                   | 4913.45168                      | -80.86711447                        | 6.277491134                     |
| 3.823984118                    | 92.72165194                              | 950.4853402                  | 8597.304738                     | -104.5673697                        | 5.755954982                     |
| 4.744753963                    | 187.0770866                              | 2115.349756                  | 34997.83635                     | -199.3381183                        | 7.64671941                      |
| 4.600626924                    | 159.0668336                              | 1382.130291                  | 25302.25755                     | -191.4738097                        | 5.406321915                     |
| 4.841235092                    | 202.3956612                              | 2995.899818                  | 40964.00369                     | -203.5970538                        | 11.38761232                     |
| 4.132764341                    | 119.4023099                              | 1014.135368                  | 14256.9116                      | -136.8374788                        | 5.779980808                     |
| 4.02125125                     | 100.4419214                              | 830.9268031                  | 10088.57958                     | -120.8321595                        | 4.08347941                      |
| 3.886306799                    | 96.96204888                              | 999.9285734                  | 9401.638923                     | -110.5140181                        | 6.550108298                     |
| 5.185040813                    | 227.8635789                              | 1825.08849                   | 51921.81058                     | -265.5289249                        | 3.902587635                     |
| 4.760414772                    | 170.3075024                              | 1317.188031                  | 29004.64536                     | -239.6944164                        | 4.198245895                     |
| 4.358852534                    | 155.3337122                              | 1852.935758                  | 24128.56215                     | -129.9476396                        | 11.99759144                     |
| 4.711944382                    | 185.3925983                              | 2268.796327                  | 34370.41549                     | -191.262373                         | 7.572837974                     |
| 3.588568578                    | 83.87628585                              | 987.6265613                  | 7035.231328                     | -78.30200169                        | 8.786190006                     |
| 4.023469098                    | 104.6342584                              | 945.5026795                  | 10948.32802                     | -121.1568908                        | 5.456504659                     |
| 3.517257005                    | 72.26632188                              | 620.4807166                  | 5222.421278                     | -91.03686048                        | 4.887884292                     |
| 4.798897658                    | 181.1436378                              | 1815.7388                    | 32813.01751                     | -187.981353                         | 5.918626556                     |
| 4.686128257                    | 158.4182804                              | 1262.85096                   | 25096.35156                     | -196.7796579                        | 3.575072407                     |
| 3.819511265                    | 88.56191449                              | 820.8240648                  | 7843.212699                     | -106.3592452                        | 4.577291818                     |
| 4.526436791                    | 159.522527                               | 1632.944128                  | 25447.43663                     | -173.9690698                        | 6.821514953                     |
| 4.058893288                    | 115.2022786                              | 1350.25769                   | 13271.56499                     | -126.6707301                        | 9.704655164                     |
| 4.497823853                    | 142.2946081                              | 1143.72456                   | 20247.75549                     | -198.0845205                        | 4.068212688                     |
| 4.797859912                    | 182.8447343                              | 1984.231705                  | 33432.19686                     | -191.3378391                        | 6.054661399                     |
| 5.002236296                    | 203.7137275                              | 2220.131497                  | 41499.28276                     | -214.574279                         | 5.23879099                      |
| 4.491693293                    | 149.1899685                              | 1428.653342                  | 22257.64671                     | -153.9607317                        | 5.84542858                      |
| 4.62021204                     | 166.244531                               | 1953.187147                  | 27637.24408                     | -186.3859036                        | 6.637266666                     |
| 5.179593232                    | 223.4538774                              | 1473.157239                  | 49931.63533                     | -257.9204024                        | 3.061365226                     |
| 3.816193433                    | 87.84007616                              | 875.2026103                  | 7715.87898                      | -103.426574                         | 4.596705971                     |
| 4.528977056                    | 175.9546262                              | 2168.870119                  | 30960.03048                     | -129.7038339                        | 11.3004533                      |
| 5.080661988                    | 212.8127326                              | 2042.843324                  | 45289.25917                     | -245.4442132                        | 4.773782913                     |
| 3.264764108                    | 61.42456982                              | 510.3355592                  | 3772.977777                     | -69.2887136                         | 5.172119739                     |
| 4.603074259                    | 165.513698                               | 1648.2922                    | 27394.78422                     | -181.9194483                        | 5.923380303                     |
| 4.705010075                    | 166.4839063                              | 1391.237083                  | 27716.89104                     | -188.140402                         | 4.489235995                     |
| 5.149385519                    | 228.0735309                              | 2754.026049                  | 52017.53552                     | -255.5678645                        | 5.652422646                     |
| 4.512366107                    | 151.8127152                              | 1698.992228                  | 23047.1005                      | -167.1844318                        | 6.693675322                     |
| 4.538642064                    | 144.5827599                              | 1129.387819                  | 20904.17446                     | -188.6676868                        | 3.922615392                     |
| 4.10863732                     | 114.2607845                              | 1169.996437                  | 13055.52688                     | -127.6671872                        | 5.716936174                     |
| 4.628957914                    | 159.2734866                              | 1436.891831                  | 25368.04354                     | -195.893973                         | 4.815268819                     |
| 3.707850179                    | 89.69630541                              | 1134.71694                   | 8045.427205                     | -93.35064422                        | 8.001116366                     |
| 4.960450739                    | 197.8967195                              | 2091.859044                  | 39163.11158                     | -253.9141134                        | 4.868984274                     |
| 4.656942082                    | 177.2482019                              | 1762.137026                  | 31416.92508                     | -167.1961478                        | 6.894075927                     |
| 4.830075542                    | 187.8929824                              | 1647.665986                  | 35303.77285                     | -224.0247275                        | 4.945712765                     |
| 5.42635446                     | 291.0421801                              | 2139.850224                  | 84705.55059                     | -311.5715913                        | 4.857649625                     |
| 3.657167778                    | 83.58543541                              | 839.1901076                  | 6986.525013                     | -93.15701092                        | 6.659776647                     |
| 4.289562036                    | 126.1771778                              | 1190.5245                    | 15920.6802                      | -147.6462189                        | 5.64407206                      |
| 4.751234427                    | 169.1117187                              | 1922.204401                  | 28598.77342                     | -196.6220771                        | 4.965292707                     |
| 4.963370537                    | 201.1240441                              | 1777.216988                  | 40450.8811                      | -218.949852                         | 4.686400512                     |
| 4.032516261                    | 126.1289679                              | 1647.893789                  | 15908.51655                     | -124.0303356                        | 10.52846937                     |
| 4.00827508                     | 115.3971992                              | 1573.650081                  | 13316.51359                     | -113.2010591                        | 9.174980878                     |
| 3.96841788                     | 99.76443304                              | 902.8944251                  | 9952.9421                       | -114.5509948                        | 5.008000171                     |
| 4.974924245                    | 207.9501793                              | 1958.085491                  | 43243.27708                     | -218.3691959                        | 6.240200633                     |
| 2.489955538                    | 34.95289763                              | 342.8149095                  | 1221.705053                     | -41.99726567                        | 5.197900439                     |
| 4.830634681                    | 179.4837371                              | 1879.392126                  | 32214.41189                     | -216.5590172                        | 4.540250936                     |
| 4.267127191                    | 134.6089206                              | 1349.09213                   | 18119.56151                     | -138.1411928                        | 6.805465739                     |
| 4.410449156                    | 146.7264653                              | 1364.911892                  | 21528.65561                     | -150.6885837                        | 6.817574201                     |
| 3.299731159                    | 63.12559477                              | 646.5977435                  | 3984.840715                     | -73.87955156                        | 5.732712033                     |
| 3.771425268                    | 103.9670545                              | 1097.280137                  | 10809.14843                     | -110.0658044                        | 9.342841732                     |
| 4.747916234                    | 181.405164                               | 2086.333781                  | 32907.83354                     | -178.1015098                        | 7.269501744                     |
| 4.583023881                    | 154.3440754                              | 1551.805362                  | 23822.09362                     | -177.1737068                        | 5.286349623                     |
| 4.324371319                    | 135.7764478                              | 1853.433712                  | 18435.24377                     | -134.7938322                        | 9.322686017                     |
| 4.744973215                    | 170.7809208                              | 1838.90081                   | 29166.1229                      | -185.6801418                        | 5.219671492                     |
| 4.90117596                     | 194.2597263                              | 1562.24705                   | 37736.84127                     | -216.5333999                        | 4.801257839                     |
| 3.828765864                    | 94.07675999                              | 1041.091458                  | 8850.43677                      | -93.2744371                         | 7.494307293                     |
| 4.095038574                    | 114.8977315                              | 1058.122579                  | 13201.4887                      | -130.2824836                        | 5.698996261                     |
| 3.19903578                     | 57.94979468                              | 545.3390762                  | 3358.178703                     | -64.91450448                        | 5.250991562                     |
| 4.959597139                    | 210.0444825                              | 2118.990924                  | 44118.68461                     | -222.2594464                        | 6.235582796                     |

| wavelet.LHH_firstorder_Mean | wavelet.LHH_glrIm_ShortRunLowGrayLevelEmphasis | wavelet.LHH_glrIm_GrayLevelVariance | wavelet.LHH_glrIm_LowGrayLevelRunEmphasis | wavelet.LHH_glrIm_GrayLevelNonUniformityNormalized |
|-----------------------------|------------------------------------------------|-------------------------------------|-------------------------------------------|----------------------------------------------------|
| 12.59924146                 | 0.001568567                                    | 62.83082651                         | 0.001595853                               | 0.041781351                                        |
| -13.01464266                | 0.001790376                                    | 42.28325193                         | 0.001812283                               | 0.057420312                                        |
| 8.122526624                 | 0.002159916                                    | 68.8102224                          | 0.002200245                               | 0.042328939                                        |
| -2.704235801                | 0.00861838                                     | 12.58215334                         | 0.008975759                               | 0.094404014                                        |
| -0.276644834                | 0.001153633                                    | 55.34663327                         | 0.001177321                               | 0.050286245                                        |
| 14.10981558                 | 0.003034161                                    | 91.16277929                         | 0.003054744                               | 0.031412428                                        |
| 15.37508247                 | 0.000636891                                    | 58.04410925                         | 0.000653781                               | 0.043220591                                        |
| -5.816270123                | 0.002198519                                    | 13.37910815                         | 0.002322082                               | 0.0979591                                          |
| 0.056941898                 | 0.001543995                                    | 24.06671818                         | 0.001605223                               | 0.072007889                                        |
| -5.5887623                  | 0.012593444                                    | 11.26588709                         | 0.013112512                               | 0.089456873                                        |
| 5.201365202                 | 0.003855374                                    | 37.42053584                         | 0.003940306                               | 0.074758628                                        |
| -2.344326838                | 0.002337137                                    | 20.968257                           | 0.002421221                               | 0.073840089                                        |
| -0.368840759                | 0.004665334                                    | 11.3603162                          | 0.004978122                               | 0.120127333                                        |
| 4.371787144                 | 0.002439791                                    | 59.04518965                         | 0.002471624                               | 0.059925401                                        |
| 0.282804931                 | 0.002770686                                    | 17.06119919                         | 0.002887191                               | 0.088062335                                        |
| 8.152147589                 | 0.001425457                                    | 63.8878865                          | 0.001463628                               | 0.051715886                                        |
| 8.280267699                 | 0.003471848                                    | 54.16810229                         | 0.00352856                                | 0.041512263                                        |
| -6.132947619                | 0.005378477                                    | 10.94630408                         | 0.005660912                               | 0.10634906                                         |
| -0.438133809                | 0.004417474                                    | 17.74266538                         | 0.004557936                               | 0.076847841                                        |
| 1.960101505                 | 0.002838941                                    | 17.34995914                         | 0.002964548                               | 0.080038791                                        |
| -5.151240589                | 0.004827582                                    | 15.57273475                         | 0.005084279                               | 0.093582492                                        |
| -3.4077827                  | 0.011730564                                    | 14.26947316                         | 0.012124457                               | 0.079359439                                        |
| -5.524398027                | 0.00764311                                     | 27.7994751                          | 0.007836936                               | 0.059800846                                        |
| 12.45613736                 | 0.002238424                                    | 41.0075236                          | 0.002299897                               | 0.050308133                                        |
| -0.760541088                | 0.007121709                                    | 9.851369402                         | 0.007420463                               | 0.101499097                                        |
| 10.19375978                 | 0.001427066                                    | 68.48853254                         | 0.001454461                               | 0.046171238                                        |
| -2.477853763                | 0.001222425                                    | 79.68110313                         | 0.00123819                                | 0.038048877                                        |
| -1.86151986                 | 0.003434767                                    | 14.34903008                         | 0.003604843                               | 0.092485989                                        |
| 6.916015514                 | 0.009598404                                    | 36.36479761                         | 0.009695751                               | 0.050992731                                        |
| -2.356387361                | 0.003149825                                    | 55.88248578                         | 0.003213765                               | 0.046698651                                        |
| 1.7469097                   | 0.001222224                                    | 26.61706417                         | 0.001282294                               | 0.084289057                                        |
| -2.911883142                | 0.001754691                                    | 60.77354111                         | 0.001796627                               | 0.04034234                                         |
| 6.737581384                 | 0.000668828                                    | 86.32312861                         | 0.00067964                                | 0.037426692                                        |
| 18.57251098                 | 0.001145947                                    | 66.95431175                         | 0.001163888                               | 0.040995543                                        |
| -1.245929476                | 0.001412895                                    | 40.38463754                         | 0.001447032                               | 0.052822984                                        |
| -1.336550331                | 0.002328796                                    | 8.551371584                         | 0.002472217                               | 0.112468808                                        |
| 0.864919009                 | 0.003185186                                    | 14.79661969                         | 0.00336136                                | 0.090314034                                        |
| 1.57053761                  | 0.000813203                                    | 58.60858516                         | 0.000838964                               | 0.050420346                                        |
| -10.22503266                | 0.002903891                                    | 41.73369891                         | 0.002963379                               | 0.05186976                                         |
| 8.099185731                 | 0.00086586                                     | 68.26867427                         | 0.00088831                                | 0.047273637                                        |
| -2.484761474                | 0.003981232                                    | 24.06351958                         | 0.004142892                               | 0.075868235                                        |
| -0.213498991                | 0.004858854                                    | 16.75270539                         | 0.005025555                               | 0.075371721                                        |
| -0.261295096                | 0.003338427                                    | 15.97452773                         | 0.003492808                               | 0.085615781                                        |
| 16.51427953                 | 0.001188938                                    | 84.70655875                         | 0.001205704                               | 0.033730651                                        |
| -30.99136037                | 0.003933765                                    | 47.62494472                         | 0.004009956                               | 0.044613296                                        |
| 8.038568599                 | 0.001305255                                    | 40.85507558                         | 0.001336379                               | 0.066062234                                        |
| 3.645027506                 | 0.000976634                                    | 57.08933859                         | 0.001001293                               | 0.053322517                                        |
| 2.180269094                 | 0.003960961                                    | 11.93782178                         | 0.004126816                               | 0.102902676                                        |
| 0.986358779                 | 0.005827404                                    | 18.36747802                         | 0.006015386                               | 0.075783129                                        |
| -2.949630887                | 0.008348215                                    | 9.038854901                         | 0.008758497                               | 0.10709697                                         |
| 18.54291792                 | 0.001367639                                    | 53.99588952                         | 0.001397776                               | 0.045030739                                        |
| -6.379156167                | 0.002009649                                    | 41.05434911                         | 0.002054036                               | 0.046789838                                        |
| -2.120594743                | 0.005287297                                    | 13.19847438                         | 0.005534607                               | 0.087513261                                        |
| -0.788398046                | 0.002212199                                    | 42.14361549                         | 0.002254306                               | 0.056943083                                        |
| 0.070630383                 | 0.004583664                                    | 22.42773849                         | 0.004712924                               | 0.077180945                                        |
| -17.33650787                | 0.002319089                                    | 33.4669776                          | 0.002381985                               | 0.054764051                                        |
| 11.60683087                 | 0.000830218                                    | 55.10117445                         | 0.000849271                               | 0.046722334                                        |
| 17.48669671                 | 0.000747066                                    | 67.97734938                         | 0.00076097                                | 0.038863818                                        |
| 6.932349211                 | 0.001872563                                    | 36.99827655                         | 0.001913416                               | 0.056962556                                        |
| 0.058997112                 | 0.000953416                                    | 46.32860077                         | 0.000986686                               | 0.054751675                                        |
| 28.88535809                 | 0.001938481                                    | 81.04938478                         | 0.001965238                               | 0.031831937                                        |
| 0.764250367                 | 0.005377731                                    | 13.05221474                         | 0.005620554                               | 0.086999082                                        |
| 20.04726915                 | 0.000688883                                    | 52.06784949                         | 0.000708817                               | 0.058404308                                        |
| 3.34962269                  | 0.000693618                                    | 73.82118036                         | 0.000709023                               | 0.037040489                                        |
| 0.017544556                 | 0.012254442                                    | 6.441134363                         | 0.012953946                               | 0.127898083                                        |
| 2.584037032                 | 0.001692915                                    | 45.75670128                         | 0.001744345                               | 0.055688115                                        |
| -0.181232129                | 0.003559353                                    | 45.67423605                         | 0.003613448                               | 0.046957014                                        |
| 15.7243427                  | 0.000683319                                    | 85.06658625                         | 0.000695756                               | 0.036147701                                        |
| 1.840188062                 | 0.00126746                                     | 38.15043405                         | 0.001300537                               | 0.057963731                                        |
| -10.37224168                | 0.003198959                                    | 34.33308798                         | 0.003289467                               | 0.05231594                                         |
| 1.820040425                 | 0.002612918                                    | 21.96041922                         | 0.002696565                               | 0.074553938                                        |
| -7.908427554                | 0.002669792                                    | 42.03586304                         | 0.002739962                               | 0.051907562                                        |
| 1.382792016                 | 0.00281247                                     | 13.83436206                         | 0.00295731                                | 0.099417355                                        |
| -14.60776419                | 0.001067628                                    | 63.89213865                         | 0.001083926                               | 0.039696785                                        |
| 12.35762517                 | 0.001636973                                    | 52.47314857                         | 0.00168241                                | 0.054213193                                        |
| -2.891650889                | 0.00147912                                     | 58.28323885                         | 0.001500809                               | 0.045220886                                        |
| 18.58171307                 | 0.002155627                                    | 138.2347772                         | 0.002185062                               | 0.030941554                                        |
| -0.525491954                | 0.006161891                                    | 12.00379524                         | 0.006433176                               | 0.100057493                                        |
| -7.742866607                | 0.003923561                                    | 26.51167824                         | 0.004015989                               | 0.064369139                                        |
| 7.468065053                 | 0.000995897                                    | 46.95622822                         | 0.001013884                               | 0.04506107                                         |
| 8.383644761                 | 0.001755693                                    | 66.28245392                         | 0.001782276                               | 0.041152439                                        |
| -1.763524265                | 0.00215325                                     | 27.46418336                         | 0.002237729                               | 0.086279489                                        |
| 1.173007099                 | 0.001178669                                    | 22.84533507                         | 0.001229544                               | 0.084499652                                        |
| -0.10232893                 | 0.003326617                                    | 16.9786663                          | 0.003494322                               | 0.079915316                                        |
| 5.89101196                  | 0.002165498                                    | 70.80507415                         | 0.002228237                               | 0.039097133                                        |
| -1.520901574                | 0.019773758                                    | 2.333684049                         | 0.022432573                               | 0.209155052                                        |
| -1.205380088                | 0.00097697                                     | 52.85592252                         | 0.00099544                                | 0.043915827                                        |
| 3.550273674                 | 0.002535465                                    | 30.62913147                         | 0.002633925                               | 0.070444223                                        |
| 4.435525814                 | 0.003614316                                    | 36.25180099                         | 0.003731034                               | 0.062770517                                        |
| -1.504794553                | 0.008019041                                    | 6.935550178                         | 0.008534958                               | 0.12511025                                         |
| 0.618596088                 | 0.005188951                                    | 75.75823203                         | 0.005447664                               | 0.100216796                                        |
| 16.1710875                  | 0.001037258                                    | 54.41304046                         | 0.001055904                               | 0.048223404                                        |
| 0.335943576                 | 0.001390314                                    | 39.57632825                         | 0.001432479                               | 0.053535147                                        |
| 6.956750887                 | 0.000987434                                    | 30.96136063                         | 0.001018702                               | 0.064062067                                        |
| 8.195213008                 | 0.000857395                                    | 47.85627062                         | 0.000877106                               | 0.047203439                                        |
| 3.6407132                   | 0.002978593                                    | 62.02973296                         | 0.003039579                               | 0.044009385                                        |
| 4.045954738                 | 0.003551637                                    | 14.15367646                         | 0.003721727                               | 0.088945323                                        |
| -0.147342385                | 0.005520015                                    | 22.04400878                         | 0.005663474                               | 0.075022731                                        |
| 1.988280115                 | 0.006885353                                    | 5.842233376                         | 0.007335954                               | 0.131863553                                        |
| 10.8712005                  | 0.000865977                                    | 73.08968778                         | 0.000888794                               | 0.043400752                                        |

| wavelet.LHH_glrIm_RunVariance | wavelet.LHH_glrIm_GrayLevelNonUniformity | wavelet.LHH_glrIm_LongRunEmphasis | wavelet.LHH_glrIm_ShortRunHighGrayLevelEmphasis | wavelet.LHH_glrIm_RunLengthNonUniformity |
|-------------------------------|------------------------------------------|-----------------------------------|-------------------------------------------------|------------------------------------------|
| 0.041506167                   | 85.26539456                              | 1.123137237                       | 1184.321456                                     | 1890.648247                              |
| 0.052945808                   | 51.1420359                               | 1.156054391                       | 1660.259091                                     | 810.4389812                              |
| 0.054121712                   | 61.79255823                              | 1.159279555                       | 1043.957659                                     | 1325.958563                              |
| 0.084832421                   | 85.42656042                              | 1.252858792                       | 181.158976                                      | 779.7862988                              |
| 0.051981489                   | 113.6443258                              | 1.150517634                       | 1564.675541                                     | 2066.014243                              |
| 0.026762765                   | 20.2284353                               | 1.077711345                       | 1101.772442                                     | 613.9723393                              |
| 0.061428893                   | 231.4654368                              | 1.175506348                       | 2376.758953                                     | 4835.303291                              |
| 0.11351716                    | 456.3184866                              | 1.3174475                         | 517.8144609                                     | 3923.858556                              |
| 0.080417849                   | 306.176642                               | 1.224960059                       | 798.2923958                                     | 3753.421566                              |
| 0.078322614                   | 89.34009543                              | 1.232489408                       | 131.5714784                                     | 871.0205083                              |
| 0.092270354                   | 104.0939722                              | 1.267538045                       | 759.7244828                                     | 1196.953154                              |
| 0.07545491                    | 159.2568446                              | 1.21828778                        | 587.2070874                                     | 1899.70886                               |
| 0.149911385                   | 199.7866728                              | 1.414244767                       | 261.0965382                                     | 1346.46582                               |
| 0.067728745                   | 96.92467126                              | 1.19621112                        | 1415.450438                                     | 1442.850677                              |
| 0.087835516                   | 161.9256017                              | 1.253012684                       | 495.8385992                                     | 1590.484007                              |
| 0.075960259                   | 211.7991916                              | 1.219077487                       | 1495.261397                                     | 3610.107016                              |
| 0.0423915                     | 47.62250272                              | 1.12627698                        | 650.4910903                                     | 1060.875175                              |
| 0.117875635                   | 118.8102026                              | 1.33774333                        | 255.50057                                       | 928.5962934                              |
| 0.067731588                   | 93.90844849                              | 1.197512515                       | 344.3199264                                     | 1088.292514                              |
| 0.077707328                   | 388.6328565                              | 1.22505785                        | 419.970756                                      | 4262.385093                              |
| 0.129250123                   | 255.8159321                              | 1.356712952                       | 292.4856249                                     | 2270.999242                              |
| 0.066735585                   | 80.48464957                              | 1.199737269                       | 159.5917196                                     | 899.0503233                              |
| 0.051010053                   | 58.45388086                              | 1.148913228                       | 316.2473001                                     | 893.5721872                              |
| 0.054464673                   | 126.823389                               | 1.157709646                       | 693.4234919                                     | 2295.576014                              |
| 0.091091771                   | 119.2163276                              | 1.267097242                       | 206.4266614                                     | 1006.515095                              |
| 0.05169212                    | 104.4676957                              | 1.148686585                       | 1314.574004                                     | 2072.435016                              |
| 0.048537107                   | 117.674418                               | 1.141842174                       | 2249.86908                                      | 2837.10421                               |
| 0.099431901                   | 234.6778351                              | 1.286091022                       | 367.7160292                                     | 2161.603066                              |
| 0.037389877                   | 21.99690231                              | 1.111788902                       | 379.2523946                                     | 402.4193546                              |
| 0.05055246                    | 91.69511446                              | 1.145575942                       | 730.3819023                                     | 1800.987208                              |
| 0.107833812                   | 367.6921545                              | 1.299900878                       | 1023.916823                                     | 3715.100561                              |
| 0.055153995                   | 79.48621559                              | 1.158711033                       | 1010.828728                                     | 1794.535838                              |
| 0.049838006                   | 115.4722947                              | 1.146142038                       | 3200.065979                                     | 2825.282322                              |
| 0.043862298                   | 92.46749087                              | 1.129983428                       | 1795.183315                                     | 2081.653475                              |
| 0.05163374                    | 222.1349085                              | 1.149232445                       | 1058.047595                                     | 3849.838467                              |
| 0.122291338                   | 305.3488113                              | 1.345017226                       | 475.7029087                                     | 2255.743327                              |
| 0.113977428                   | 307.1179846                              | 1.316534164                       | 371.6133767                                     | 2880.198113                              |
| 0.086218588                   | 242.3374667                              | 1.2410697                         | 2023.191282                                     | 4206.364845                              |
| 0.050131757                   | 60.94889015                              | 1.146454639                       | 650.336027                                      | 1075.663182                              |
| 0.064246739                   | 324.7045696                              | 1.185583129                       | 1908.090909                                     | 6161.380251                              |
| 0.087867099                   | 182.9808156                              | 1.246745072                       | 381.7079889                                     | 2105.448361                              |
| 0.063696861                   | 275.2639498                              | 1.185762373                       | 309.883184                                      | 3272.165049                              |
| 0.088659365                   | 289.8621406                              | 1.255655235                       | 374.7849142                                     | 2930.658491                              |
| 0.037730816                   | 80.96125764                              | 1.112464562                       | 1729.587411                                     | 2236.821077                              |
| 0.049888804                   | 54.47163879                              | 1.146313196                       | 572.1070786                                     | 1117.745272                              |
| 0.085830075                   | 168.5323539                              | 1.245220253                       | 1697.366511                                     | 2220.265891                              |
| 0.060897491                   | 230.7687445                              | 1.1732165                         | 1647.254569                                     | 3916.498927                              |
| 0.095432924                   | 82.51893906                              | 1.276277979                       | 373.7398066                                     | 684.8469689                              |
| 0.065824715                   | 60.77034258                              | 1.193286694                       | 279.4187241                                     | 714.86444                                |
| 0.117282366                   | 131.5928791                              | 1.329534678                       | 175.9514043                                     | 1028.06016                               |
| 0.055534605                   | 109.9866159                              | 1.162917791                       | 1318.3225                                       | 2216.437863                              |
| 0.042348491                   | 151.6473526                              | 1.124787508                       | 762.364584                                      | 3002.99422                               |
| 0.082168639                   | 367.2403876                              | 1.239468884                       | 238.3835313                                     | 3654.161331                              |
| 0.051031259                   | 59.92812233                              | 1.15221141                        | 938.7677552                                     | 958.1864232                              |
| 0.077128331                   | 95.98708892                              | 1.221889027                       | 422.7445489                                     | 1093.84349                               |
| 0.056351096                   | 101.3996922                              | 1.166150848                       | 673.9484724                                     | 1674.245477                              |
| 0.056401325                   | 179.6848053                              | 1.163503478                       | 2002.757298                                     | 3491.052558                              |
| 0.051383831                   | 128.3648858                              | 1.148001384                       | 2501.865329                                     | 3024.862015                              |
| 0.054294646                   | 89.32296612                              | 1.160255036                       | 948.8226123                                     | 1424.067297                              |
| 0.072068075                   | 470.9133455                              | 1.200147909                       | 1321.77141                                      | 7697.381827                              |
| 0.034937988                   | 54.39001086                              | 1.103551892                       | 1249.353646                                     | 1601.939974                              |
| 0.087327517                   | 215.6808711                              | 1.248429671                       | 241.4511521                                     | 2156.141771                              |
| 0.069140996                   | 317.8664752                              | 1.201621081                       | 2279.384747                                     | 4834.501169                              |
| 0.042426263                   | 271.4807237                              | 1.124652564                       | 2094.055969                                     | 6791.211971                              |
| 0.114364927                   | 91.70180406                              | 1.332015862                       | 108.9350116                                     | 596.5189721                              |
| 0.067835431                   | 202.9821441                              | 1.191901641                       | 886.3292741                                     | 3266.71381                               |
| 0.050796614                   | 58.48032144                              | 1.147435843                       | 725.034941                                      | 1139.207407                              |
| 0.041628838                   | 217.3545513                              | 1.122496527                       | 2426.413021                                     | 5576.435067                              |
| 0.056123869                   | 323.1681949                              | 1.16049638                        | 1125.373418                                     | 5078.778139                              |
| 0.054584378                   | 144.2218252                              | 1.16051166                        | 503.7237819                                     | 2502.661638                              |
| 0.076897865                   | 90.62107806                              | 1.220082017                       | 598.1265272                                     | 1071.613001                              |
| 0.058303718                   | 211.6785715                              | 1.165658967                       | 605.8628646                                     | 3705.258869                              |
| 0.114429339                   | 206.7969931                              | 1.316624364                       | 448.9194581                                     | 1757.239848                              |
| 0.038517092                   | 86.43673771                              | 1.115173342                       | 1857.626467                                     | 2025.609434                              |
| 0.073481802                   | 159.2487507                              | 1.210702512                       | 1221.62289                                      | 2602.029433                              |
| 0.052854165                   | 57.912047                                | 1.152345264                       | 1632.199505                                     | 1171.315845                              |
| 0.036642805                   | 71.68859144                              | 1.106945635                       | 1489.823881                                     | 2171.759748                              |
| 0.109856296                   | 87.88086341                              | 1.303495953                       | 237.2668279                                     | 748.5149042                              |
| 0.059058694                   | 104.0328683                              | 1.176489179                       | 497.9855379                                     | 1453.292278                              |
| 0.047738136                   | 100.8222806                              | 1.141013212                       | 1902.634764                                     | 2052.379716                              |
| 0.039935527                   | 78.8384062                               | 1.118305051                       | 1177.924369                                     | 1780.417998                              |
| 0.108887658                   | 142.2711572                              | 1.301747561                       | 732.8011781                                     | 1404.235568                              |
| 0.102880359                   | 254.2730475                              | 1.285936259                       | 1145.806265                                     | 2580.292013                              |
| 0.097511285                   | 226.5572114                              | 1.274940165                       | 376.230954                                      | 2439.287612                              |
| 0.052432914                   | 90.91338042                              | 1.153556522                       | 1519.875488                                     | 2121.127869                              |
| 0.302131676                   | 261.5100898                              | 1.816003905                       | 49.43167322                                     | 874.2739305                              |
| 0.052139595                   | 99.87977164                              | 1.152380787                       | 1958.825792                                     | 2074.636885                              |
| 0.082083587                   | 180.1785046                              | 1.233148459                       | 562.7062227                                     | 2243.558483                              |
| 0.063572105                   | 86.92283427                              | 1.182709273                       | 621.7931599                                     | 1245.369204                              |
| 0.13584875                    | 227.3371976                              | 1.379731862                       | 149.5692076                                     | 1487.045308                              |
| 0.128032125                   | 118.001932                               | 1.358229775                       | 302.6975293                                     | 975.3881049                              |
| 0.052407445                   | 109.6772225                              | 1.150041687                       | 1853.008654                                     | 2082.54331                               |
| 0.061732595                   | 262.7530149                              | 1.177605561                       | 992.8195705                                     | 4422.967926                              |
| 0.075344742                   | 197.8514583                              | 1.217814637                       | 1537.355737                                     | 2720.578868                              |
| 0.048699842                   | 196.5367261                              | 1.141839228                       | 1741.54364                                      | 3823.009057                              |
| 0.051470152                   | 143.8985773                              | 1.147303555                       | 969.5739014                                     | 2997.959443                              |
| 0.087933516                   | 232.408002                               | 1.251957897                       | 344.5552322                                     | 2266.588632                              |
| 0.082138966                   | 73.31256989                              | 1.232077326                       | 384.1512454                                     | 858.6829535                              |
| 0.14662502                    | 98.25985642                              | 1.403235655                       | 175.9531047                                     | 606.9530148                              |
| 0.063275345                   | 237.2286116                              | 1.180410431                       | 1841.861409                                     | 4927.071007                              |

| wavelet.LHH_glrIm_ShortRunEmphasis | wavelet.LHH_glrIm_LongRunHighGrayLevelEmphasis | wavelet.LHH_glrIm_RunPercentage | wavelet.LHH_glrIm_LongRunLowGrayLevelEmphasis | wavelet.LHH_glrIm_RunEntropy |
|------------------------------------|------------------------------------------------|---------------------------------|-----------------------------------------------|------------------------------|
| 0.971009725                        | 1363.967194                                    | 0.961683463                     | 0.001711405                                   | 5.170368844                  |
| 0.963986783                        | 1985.387816                                    | 0.952529823                     | 0.00190741                                    | 4.772358599                  |
| 0.963315452                        | 1246.098378                                    | 0.951559523                     | 0.002375909                                   | 5.239696062                  |
| 0.9429647                          | 238.1623103                                    | 0.926068813                     | 0.010537839                                   | 4.161963571                  |
| 0.965803161                        | 1849.484711                                    | 0.954359407                     | 0.001281094                                   | 5.025805276                  |
| 0.981858801                        | 1201.628511                                    | 0.975641026                     | 0.003142425                                   | 5.360459334                  |
| 0.961020849                        | 2896.986056                                    | 0.947674339                     | 0.000729759                                   | 5.192361623                  |
| 0.934235551                        | 728.8092352                                    | 0.911872779                     | 0.002916305                                   | 4.226355512                  |
| 0.952085072                        | 1019.292365                                    | 0.935260076                     | 0.001892051                                   | 4.55536483                   |
| 0.947523758                        | 168.5184327                                    | 0.931544202                     | 0.015380209                                   | 4.117472926                  |
| 0.941814788                        | 1014.270317                                    | 0.923178943                     | 0.004326087                                   | 4.653909054                  |
| 0.951588447                        | 749.6171185                                    | 0.935658268                     | 0.002798873                                   | 4.481528834                  |
| 0.918098238                        | 397.7280117                                    | 0.890651395                     | 0.006558322                                   | 4.05046683                   |
| 0.956207677                        | 1760.28023                                     | 0.941893284                     | 0.002613616                                   | 4.925572616                  |
| 0.944634897                        | 652.2929176                                    | 0.926721464                     | 0.003416048                                   | 4.315508029                  |
| 0.951706833                        | 1907.477535                                    | 0.935786106                     | 0.001633243                                   | 5.120309585                  |
| 0.970233534                        | 752.2701724                                    | 0.960765365                     | 0.003766654                                   | 5.08417839                   |
| 0.9289957                          | 367.1861422                                    | 0.905982906                     | 0.006989919                                   | 4.095638538                  |
| 0.955566499                        | 427.5849099                                    | 0.941389119                     | 0.005179305                                   | 4.358221242                  |
| 0.950199982                        | 536.3117662                                    | 0.933951795                     | 0.003529582                                   | 4.372365946                  |
| 0.928264241                        | 422.6720442                                    | 0.903820716                     | 0.006348636                                   | 4.347900834                  |
| 0.953858008                        | 199.4576161                                    | 0.939972909                     | 0.013806192                                   | 4.252441186                  |
| 0.965848471                        | 372.8977667                                    | 0.95452284                      | 0.00865419                                    | 4.625829673                  |
| 0.964275907                        | 824.812433                                     | 0.952340821                     | 0.002569982                                   | 4.931744813                  |
| 0.940840755                        | 276.0698961                                    | 0.922653937                     | 0.008761839                                   | 4.021303193                  |
| 0.966492123                        | 1551.673853                                    | 0.955060558                     | 0.001576116                                   | 5.162422744                  |
| 0.967224133                        | 2652.831928                                    | 0.956577601                     | 0.001306041                                   | 5.336610009                  |
| 0.938459198                        | 500.0508073                                    | 0.918620843                     | 0.004392722                                   | 4.258288897                  |
| 0.973456321                        | 430.9706927                                    | 0.965066254                     | 0.010103678                                   | 4.732987084                  |
| 0.967036425                        | 856.9130264                                    | 0.955920905                     | 0.003489138                                   | 5.072994181                  |
| 0.938152647                        | 1405.133673                                    | 0.91667475                      | 0.001572602                                   | 4.529824197                  |
| 0.964277694                        | 1205.565694                                    | 0.952299513                     | 0.001981923                                   | 5.203910009                  |
| 0.966372434                        | 3786.027758                                    | 0.955427972                     | 0.000726506                                   | 5.369312263                  |
| 0.969503441                        | 2087.893438                                    | 0.959770867                     | 0.001240002                                   | 5.210341745                  |
| 0.966235543                        | 1251.16662                                     | 0.954848739                     | 0.00159755                                    | 4.889996451                  |
| 0.928578545                        | 688.2997618                                    | 0.905224819                     | 0.003162816                                   | 3.981858243                  |
| 0.935469128                        | 518.257701                                     | 0.913588159                     | 0.004226402                                   | 4.310071604                  |
| 0.948844133                        | 2644.314953                                    | 0.931140357                     | 0.000960175                                   | 5.148901786                  |
| 0.966361479                        | 765.8109887                                    | 0.955284553                     | 0.003220534                                   | 4.866376047                  |
| 0.958477229                        | 2349.880409                                    | 0.944725426                     | 0.000988442                                   | 5.182593106                  |
| 0.947736513                        | 494.1861964                                    | 0.929660163                     | 0.004895381                                   | 4.543209758                  |
| 0.958053152                        | 380.7035297                                    | 0.944401345                     | 0.005756436                                   | 4.356776156                  |
| 0.944374756                        | 494.7213412                                    | 0.926698814                     | 0.004198881                                   | 4.310056762                  |
| 0.973278816                        | 1978.91337                                     | 0.964722978                     | 0.001275839                                   | 5.407577869                  |
| 0.96629527                         | 670.6412212                                    | 0.955338871                     | 0.004341006                                   | 5.023596925                  |
| 0.946775139                        | 2220.573922                                    | 0.929270001                     | 0.001479658                                   | 4.771640247                  |
| 0.961758663                        | 1995.786644                                    | 0.948588676                     | 0.001112516                                   | 5.03469644                   |
| 0.939610209                        | 501.1691397                                    | 0.920692396                     | 0.004884448                                   | 4.026525336                  |
| 0.956064082                        | 344.1974418                                    | 0.942239899                     | 0.006830421                                   | 4.353453444                  |
| 0.931609209                        | 247.9356879                                    | 0.90873919                      | 0.010715528                                   | 4.013417898                  |
| 0.962814676                        | 1585.56562                                     | 0.950714136                     | 0.001529128                                   | 5.094898145                  |
| 0.970905143                        | 876.4920011                                    | 0.961435776                     | 0.002244794                                   | 4.928615867                  |
| 0.946967892                        | 308.3899584                                    | 0.930083879                     | 0.006647372                                   | 4.225374629                  |
| 0.964289882                        | 1111.547162                                    | 0.953246934                     | 0.0024309                                     | 4.806028257                  |
| 0.951008752                        | 536.2987412                                    | 0.934991324                     | 0.0052942                                     | 4.435542296                  |
| 0.961681981                        | 812.6573372                                    | 0.949506903                     | 0.002654166                                   | 4.799999391                  |
| 0.963062515                        | 2409.561136                                    | 0.950708377                     | 0.000933642                                   | 5.101000825                  |
| 0.96648996                         | 2964.451364                                    | 0.955154158                     | 0.000822264                                   | 5.275615463                  |
| 0.963105494                        | 1137.539498                                    | 0.951409634                     | 0.00209043                                    | 4.785795943                  |
| 0.957382214                        | 1647.724791                                    | 0.94202752                      | 0.001142415                                   | 4.975885823                  |
| 0.975474968                        | 1414.381176                                    | 0.967549438                     | 0.002077123                                   | 5.373440472                  |
| 0.946493534                        | 314.9576467                                    | 0.92849323                      | 0.006740695                                   | 4.226970074                  |
| 0.95471718                         | 2856.898189                                    | 0.940098595                     | 0.000797504                                   | 4.894111073                  |
| 0.97098116                         | 2421.763628                                    | 0.961472871                     | 0.000774921                                   | 5.326738914                  |
| 0.929053133                        | 153.3993101                                    | 0.907400195                     | 0.016215195                                   | 3.76385784                   |
| 0.958051117                        | 1090.560267                                    | 0.943672071                     | 0.001977823                                   | 4.947193984                  |
| 0.966189774                        | 852.294668                                     | 0.955049552                     | 0.003848126                                   | 4.973930643                  |
| 0.971382827                        | 2801.030637                                    | 0.962043077                     | 0.000748911                                   | 5.394189361                  |
| 0.964267828                        | 1348.030882                                    | 0.951918152                     | 0.0014488                                     | 4.813688819                  |
| 0.963111048                        | 603.3048534                                    | 0.951213038                     | 0.003678358                                   | 4.833092771                  |
| 0.951825966                        | 759.556529                                     | 0.935630959                     | 0.003077579                                   | 4.481761115                  |
| 0.963351491                        | 725.3434735                                    | 0.950582751                     | 0.003055327                                   | 4.9342443                    |
| 0.935139883                        | 626.8256787                                    | 0.912681                        | 0.003662842                                   | 4.197748767                  |
| 0.972569505                        | 2115.932343                                    | 0.963905064                     | 0.001152652                                   | 5.185834281                  |
| 0.953616401                        | 1536.309495                                    | 0.93811267                      | 0.001886371                                   | 5.026178911                  |
| 0.965771412                        | 1944.332399                                    | 0.954201536                     | 0.001596908                                   | 5.101930225                  |
| 0.975251749                        | 1679.633215                                    | 0.966932066                     | 0.002308665                                   | 5.630998552                  |
| 0.938049401                        | 324.91001                                      | 0.916572989                     | 0.007761114                                   | 4.116865491                  |
| 0.959173557                        | 606.5284603                                    | 0.946735163                     | 0.004413809                                   | 4.606789968                  |
| 0.967175706                        | 2237.60165                                     | 0.956588943                     | 0.001090979                                   | 5.015705895                  |
| 0.97217257                         | 1348.60935                                     | 0.963143443                     | 0.001894991                                   | 5.194343852                  |
| 0.938152542                        | 1007.823692                                    | 0.916363792                     | 0.002647936                                   | 4.516447529                  |
| 0.940677904                        | 1557.157011                                    | 0.92037085                      | 0.001474262                                   | 4.467598863                  |
| 0.941942496                        | 500.775608                                     | 0.922501189                     | 0.004281316                                   | 4.408872192                  |
| 0.964847017                        | 1805.374082                                    | 0.953385688                     | 0.002488057                                   | 5.252517754                  |
| 0.859970634                        | 103.9953318                                    | 0.815977104                     | 0.0376907                                     | 3.384055607                  |
| 0.965018627                        | 2335.621092                                    | 0.953588131                     | 0.001075632                                   | 5.110210677                  |
| 0.94964997                         | 719.474778                                     | 0.932727375                     | 0.003087087                                   | 4.66359853                   |
| 0.95935604                         | 756.6659329                                    | 0.945775536                     | 0.004232139                                   | 4.734462491                  |
| 0.922951071                        | 221.9354114                                    | 0.897283951                     | 0.011060277                                   | 3.855025681                  |
| 0.927161826                        | 437.941817                                     | 0.902784332                     | 0.006701873                                   | 4.306329473                  |
| 0.966356602                        | 2199.736182                                    | 0.95475683                      | 0.001138808                                   | 5.026921318                  |
| 0.960312963                        | 1211.510078                                    | 0.946912243                     | 0.00162068                                    | 4.909542572                  |
| 0.95163769                         | 1959.944893                                    | 0.935850816                     | 0.001159542                                   | 4.703037244                  |
| 0.967474043                        | 2047.103005                                    | 0.956695419                     | 0.000962906                                   | 5.01584099                   |
| 0.966932448                        | 1142.213564                                    | 0.955469136                     | 0.003299827                                   | 5.179157547                  |
| 0.945478193                        | 449.7219496                                    | 0.927473308                     | 0.004504425                                   | 4.247089659                  |
| 0.950276983                        | 490.6872371                                    | 0.933215781                     | 0.006327965                                   | 4.475001996                  |
| 0.92059154                         | 265.124063                                     | 0.893377606                     | 0.00961755                                    | 3.757770585                  |
| 0.960206747                        | 2253.287709                                    | 0.946590818                     | 0.000993846                                   | 5.287081084                  |

| wavelet.LHH_glrIm_HighGrayLevelRunEmphasis | wavelet.LHH_glrIm_RunLengthNonUniformityNormalized | wavelet.LHH_glszm_GrayLevelVariance | wavelet.LHH_glszm_SmallAreaHighGrayLevelEmphasis |
|--------------------------------------------|----------------------------------------------------|-------------------------------------|--------------------------------------------------|
| 1218.546078                                | 0.926284361                                        | 83.40228901                         | 935.6655963                                      |
| 1721.38656                                 | 0.90953828                                         | 62.97577206                         | 1266.03392                                       |
| 1081.991905                                | 0.907986538                                        | 95.26218386                         | 840.0475014                                      |
| 191.6062727                                | 0.861075802                                        | 23.27687786                         | 142.7362736                                      |
| 1617.399761                                | 0.913908275                                        | 77.79306389                         | 1271.028395                                      |
| 1120.746684                                | 0.95328242                                         | 106.2344875                         | 951.9418503                                      |
| 2471.473374                                | 0.902617252                                        | 79.78535191                         | 1824.405586                                      |
| 554.0237201                                | 0.841960933                                        | 26.87524844                         | 398.10168                                        |
| 837.1295507                                | 0.882236045                                        | 39.71410912                         | 631.7688982                                      |
| 138.3929046                                | 0.871477923                                        | 18.30032695                         | 109.1038363                                      |
| 805.248538                                 | 0.858946529                                        | 69.29977001                         | 572.5698483                                      |
| 616.6953434                                | 0.880573174                                        | 34.62210002                         | 440.2396569                                      |
| 283.6975395                                | 0.808461206                                        | 27.55305012                         | 221.1193089                                      |
| 1478.29998                                 | 0.891566498                                        | 98.56479035                         | 1160.455507                                      |
| 523.9191082                                | 0.86471015                                         | 31.92101265                         | 412.1921988                                      |
| 1569.651215                                | 0.881064615                                        | 103.9433734                         | 1130.644687                                      |
| 669.8764068                                | 0.924493835                                        | 68.83942726                         | 516.9805221                                      |
| 274.8670166                                | 0.830681983                                        | 22.82000265                         | 194.5058544                                      |
| 359.6235496                                | 0.889988816                                        | 27.03581696                         | 258.3954955                                      |
| 441.0327056                                | 0.877437844                                        | 29.9625491                          | 329.1767476                                      |
| 314.2964043                                | 0.829744306                                        | 29.90154253                         | 234.349896                                       |
| 167.0607082                                | 0.885856278                                        | 20.6441268                          | 123.5107165                                      |
| 326.8161277                                | 0.913955851                                        | 39.97262922                         | 252.3178058                                      |
| 717.7096644                                | 0.910314761                                        | 53.42927875                         | 544.5221062                                      |
| 219.0444149                                | 0.856351816                                        | 18.86377001                         | 154.2145676                                      |
| 1358.306988                                | 0.915660616                                        | 96.15689898                         | 1083.121601                                      |
| 2325.585198                                | 0.917146587                                        | 105.0450816                         | 1740.936275                                      |
| 391.1547309                                | 0.85130384                                         | 28.48145946                         | 295.9753856                                      |
| 389.1986079                                | 0.932468621                                        | 43.40868284                         | 295.2771197                                      |
| 753.7113657                                | 0.916927223                                        | 74.0863912                          | 601.0043372                                      |
| 1089.070906                                | 0.851014909                                        | 51.81702254                         | 846.5658533                                      |
| 1046.601624                                | 0.910378139                                        | 76.60320153                         | 776.1035877                                      |
| 3309.576363                                | 0.915365283                                        | 116.4044813                         | 2437.9638                                        |
| 1850.723669                                | 0.922666507                                        | 89.52384924                         | 1404.395218                                      |
| 1093.718755                                | 0.915114984                                        | 55.99187549                         | 851.7109172                                      |
| 512.1276572                                | 0.830044725                                        | 18.70142104                         | 351.9001066                                      |
| 396.5421298                                | 0.845692226                                        | 29.30123751                         | 297.8389622                                      |
| 2132.135001                                | 0.874700558                                        | 89.57082518                         | 1487.724776                                      |
| 671.9249468                                | 0.915199417                                        | 57.8252651                          | 506.8034701                                      |
| 1988.91331                                 | 0.896671934                                        | 105.0600664                         | 1451.958171                                      |
| 401.417423                                 | 0.872362306                                        | 40.48654871                         | 314.5558173                                      |
| 322.9800393                                | 0.895603334                                        | 25.24773847                         | 230.9997869                                      |
| 396.1997389                                | 0.864716033                                        | 28.22923671                         | 288.3354657                                      |
| 1777.31531                                 | 0.93177368                                         | 104.5031995                         | 1340.256779                                      |
| 590.6157337                                | 0.915119582                                        | 62.91387283                         | 462.1768918                                      |
| 1790.733035                                | 0.869820617                                        | 75.2299147                          | 1264.296391                                      |
| 1710.349124                                | 0.904577793                                        | 86.52976459                         | 1336.404009                                      |
| 396.6123891                                | 0.85353138                                         | 25.17981279                         | 293.3584904                                      |
| 291.379017                                 | 0.890997529                                        | 28.89841037                         | 219.2303238                                      |
| 188.3054001                                | 0.836279587                                        | 18.10781596                         | 137.3514879                                      |
| 1367.866435                                | 0.906988484                                        | 75.49794956                         | 996.9110358                                      |
| 784.0442657                                | 0.926234618                                        | 51.93387084                         | 612.3883528                                      |
| 251.0827929                                | 0.870201574                                        | 22.53029915                         | 185.8932314                                      |
| 971.7385059                                | 0.910131302                                        | 63.36394038                         | 762.6637071                                      |
| 443.3353144                                | 0.879238798                                        | 39.44727392                         | 334.9666397                                      |
| 699.9669087                                | 0.903942016                                        | 47.51260153                         | 523.1628333                                      |
| 2077.852783                                | 0.907453194                                        | 78.36623013                         | 1540.378879                                      |
| 2587.258597                                | 0.91555572                                         | 89.76482881                         | 1900.174768                                      |
| 984.1588878                                | 0.907669925                                        | 54.24528073                         | 743.3448403                                      |
| 1379.007001                                | 0.894532078                                        | 68.71618322                         | 1065.085291                                      |
| 1281.018274                                | 0.937293418                                        | 90.98630753                         | 988.1966025                                      |
| 254.5004367                                | 0.869249733                                        | 22.5237434                          | 189.7830601                                      |
| 2385.394869                                | 0.88786962                                         | 88.42626669                         | 1738.697153                                      |
| 2155.969381                                | 0.926329844                                        | 91.72537038                         | 1627.640652                                      |
| 116.7764933                                | 0.83102186                                         | 13.6012931                          | 87.64766794                                      |
| 922.9468172                                | 0.895846898                                        | 71.28159843                         | 739.5918056                                      |
| 748.761941                                 | 0.914598736                                        | 64.83801308                         | 575.8564976                                      |
| 2497.366657                                | 0.927226426                                        | 109.4210049                         | 1891.457299                                      |
| 1165.933712                                | 0.910530313                                        | 54.67078577                         | 907.2283548                                      |
| 522.2863579                                | 0.907503051                                        | 45.83517343                         | 392.9810774                                      |
| 627.1075607                                | 0.881313089                                        | 37.46545958                         | 470.6615755                                      |
| 627.5556342                                | 0.908268724                                        | 60.52831551                         | 498.9950073                                      |
| 479.2286692                                | 0.844203623                                        | 27.39483614                         | 352.6114092                                      |
| 1907.442436                                | 0.930060587                                        | 82.24962637                         | 1483.961139                                      |
| 1278.617089                                | 0.885438977                                        | 80.49511153                         | 962.7854696                                      |
| 1689.393654                                | 0.914153131                                        | 80.63550962                         | 1256.973333                                      |
| 1525.504728                                | 0.937020948                                        | 171.0173156                         | 1231.500603                                      |
| 252.1774697                                | 0.851233539                                        | 23.53432052                         | 181.3633264                                      |
| 518.4095052                                | 0.898454503                                        | 39.53249891                         | 382.0620356                                      |
| 1965.797711                                | 0.917049079                                        | 61.75495101                         | 1455.053227                                      |
| 1210.448108                                | 0.929181933                                        | 86.88175056                         | 945.3408939                                      |
| 779.5893462                                | 0.851049008                                        | 54.7727435                          | 612.3115499                                      |
| 1216.48249                                 | 0.856650412                                        | 42.24495621                         | 897.6878501                                      |
| 397.9199171                                | 0.859494954                                        | 29.515117                           | 312.683895                                       |
| 1572.90149                                 | 0.91173734                                         | 92.96642292                         | 1170.058817                                      |
| 57.41306041                                | 0.69688179                                         | 7.130983382                         | 38.23407747                                      |
| 2029.118256                                | 0.911940533                                        | 70.34879898                         | 1496.439139                                      |
| 590.571142                                 | 0.876557219                                        | 50.52017783                         | 473.7533255                                      |
| 646.3508714                                | 0.898890792                                        | 55.90105686                         | 525.7308295                                      |
| 161.761916                                 | 0.817799237                                        | 16.45745037                         | 119.6661131                                      |
| 325.5711459                                | 0.827402597                                        | 38.87408686                         | 251.3696287                                      |
| 1916.49553                                 | 0.915400351                                        | 76.59198214                         | 1462.41403                                       |
| 1032.832314                                | 0.900918796                                        | 57.88175198                         | 768.2400712                                      |
| 1614.208445                                | 0.880620988                                        | 51.37402992                         | 1133.305118                                      |
| 1798.600186                                | 0.917921056                                        | 64.08738559                         | 1349.285742                                      |
| 1001.221967                                | 0.916691833                                        | 83.40896138                         | 774.1798344                                      |
| 363.3004117                                | 0.866943633                                        | 26.10121644                         | 279.8401784                                      |
| 402.9547462                                | 0.87814681                                         | 37.76827526                         | 317.6839569                                      |
| 190.6515678                                | 0.813457377                                        | 13.77943032                         | 125.6221927                                      |
| 1916.371959                                | 0.900950115                                        | 104.5780388                         | 1446.119746                                      |



| wavelet.LHH_glszm_GrayLevelNonUniformityNormalized | wavelet.LHH_glszm_SizeZoneNonUniformityNormalized | wavelet.LHH_glszm_SizeZoneNonUniformity | wavelet.LHH_glszm_GrayLevelNonUniformity |
|----------------------------------------------------|---------------------------------------------------|-----------------------------------------|------------------------------------------|
| 0.03353658                                         | 0.510991781                                       | 650.4925373                             | 42.69206599                              |
| 0.044383803                                        | 0.480880497                                       | 244.7681729                             | 22.5913556                               |
| 0.031566564                                        | 0.519443072                                       | 438.4099526                             | 26.64218009                              |
| 0.060412366                                        | 0.436192172                                       | 157.465374                              | 21.80886427                              |
| 0.037513732                                        | 0.511802875                                       | 676.0915973                             | 49.55563967                              |
| 0.02795983                                         | 0.636268184                                       | 309.2263374                             | 13.58847737                              |
| 0.034567538                                        | 0.48497834                                        | 1430.686102                             | 101.9742373                              |
| 0.059444496                                        | 0.448481981                                       | 777.2192729                             | 103.017311                               |
| 0.049589262                                        | 0.473168855                                       | 996.9667774                             | 104.4845752                              |
| 0.067305282                                        | 0.446122173                                       | 193.1709007                             | 29.14318707                              |
| 0.046265514                                        | 0.429930355                                       | 261.8275862                             | 28.17569787                              |
| 0.051580637                                        | 0.442484651                                       | 447.7944664                             | 52.19960474                              |
| 0.065000517                                        | 0.478808675                                       | 244.6712329                             | 33.21526419                              |
| 0.038395003                                        | 0.52478362                                        | 445.0165094                             | 32.55896226                              |
| 0.054967038                                        | 0.503314626                                       | 406.6782178                             | 44.41336634                              |
| 0.035148193                                        | 0.449461201                                       | 909.2600099                             | 71.10479486                              |
| 0.035331988                                        | 0.520902234                                       | 376.0914127                             | 25.50969529                              |
| 0.066352922                                        | 0.41490243                                        | 157.2480211                             | 25.14775726                              |
| 0.05775104                                         | 0.42392832                                        | 264.9552                                | 36.0944                                  |
| 0.054937631                                        | 0.450495259                                       | 967.2133209                             | 117.9510946                              |
| 0.055672116                                        | 0.42761475                                        | 433.1737414                             | 56.3958539                               |
| 0.062858038                                        | 0.424754554                                       | 197.9356223                             | 29.29184549                              |
| 0.04725346                                         | 0.471939879                                       | 256.7352941                             | 25.70588235                              |
| 0.040772294                                        | 0.471703946                                       | 671.2347154                             | 58.018974                                |
| 0.0692029                                          | 0.412338407                                       | 182.6659142                             | 30.65688488                              |
| 0.034108608                                        | 0.555766362                                       | 776.9613734                             | 47.68383405                              |
| 0.031276251                                        | 0.512708383                                       | 972.6078018                             | 59.33104902                              |
| 0.058414285                                        | 0.455841686                                       | 449.0040609                             | 57.53807107                              |
| 0.046535729                                        | 0.51888524                                        | 146.844523                              | 13.16961131                              |
| 0.036711157                                        | 0.540622796                                       | 647.6661102                             | 43.97996661                              |
| 0.048299271                                        | 0.489095836                                       | 907.2727763                             | 89.59514825                              |
| 0.034357462                                        | 0.467066327                                       | 523.1142857                             | 38.48035714                              |
| 0.031167636                                        | 0.495796967                                       | 918.2159827                             | 57.7224622                               |
| 0.03343317                                         | 0.514456051                                       | 722.2962963                             | 46.94017094                              |
| 0.040470119                                        | 0.525534244                                       | 1319.616487                             | 101.6204699                              |
| 0.071322336                                        | 0.416727961                                       | 358.3860465                             | 61.3372093                               |
| 0.056550399                                        | 0.45888781                                        | 587.8352849                             | 72.44106167                              |
| 0.035258335                                        | 0.447365396                                       | 1034.756161                             | 81.55252918                              |
| 0.040225461                                        | 0.481004224                                       | 327.5638767                             | 27.39353891                              |
| 0.034891802                                        | 0.461226988                                       | 1707.001081                             | 129.1345582                              |
| 0.0485062                                          | 0.46585968                                        | 518.967684                              | 54.03590664                              |
| 0.05656787                                         | 0.43697262                                        | 790.920442                              | 102.3878453                              |
| 0.057767972                                        | 0.431375048                                       | 617.2976939                             | 82.66596785                              |
| 0.029276121                                        | 0.532597294                                       | 840.4385298                             | 46.19771863                              |
| 0.037452209                                        | 0.504956387                                       | 369.123119                              | 27.37756498                              |
| 0.043962941                                        | 0.429055185                                       | 487.4066901                             | 49.94190141                              |
| 0.036091249                                        | 0.518844168                                       | 1241.075251                             | 86.33026756                              |
| 0.068241693                                        | 0.40407192                                        | 115.9686411                             | 19.58536585                              |
| 0.056233724                                        | 0.438435872                                       | 168.359375                              | 21.59375                                 |
| 0.071570459                                        | 0.428728312                                       | 184.7819026                             | 30.84686775                              |
| 0.036727312                                        | 0.475433064                                       | 642.785503                              | 49.65532544                              |
| 0.03969769                                         | 0.515848859                                       | 1053.363369                             | 81.06268364                              |
| 0.061130753                                        | 0.418694629                                       | 741.5081875                             | 108.2625635                              |
| 0.041390842                                        | 0.505837975                                       | 299.4560811                             | 24.50337838                              |
| 0.053181413                                        | 0.433318409                                       | 248.2914485                             | 30.47294939                              |
| 0.042503023                                        | 0.475783139                                       | 483.3956693                             | 43.18307087                              |
| 0.036237732                                        | 0.481912797                                       | 1041.895467                             | 78.34597595                              |
| 0.032456322                                        | 0.492397253                                       | 948.849507                              | 62.5433316                               |
| 0.043296626                                        | 0.49619841                                        | 439.1355932                             | 38.31751412                              |
| 0.038144275                                        | 0.515321922                                       | 2475.091193                             | 183.206954                               |
| 0.029695068                                        | 0.558425163                                       | 655.5911414                             | 34.86201022                              |
| 0.060963149                                        | 0.430905003                                       | 447.7102984                             | 63.34071222                              |
| 0.041635644                                        | 0.466365695                                       | 1272.711982                             | 113.6236717                              |
| 0.031840304                                        | 0.516138347                                       | 2356.687692                             | 145.3828296                              |
| 0.082008026                                        | 0.393504756                                       | 91.29310345                             | 19.02586207                              |
| 0.036728563                                        | 0.522131864                                       | 1039.56454                              | 73.12656956                              |
| 0.037589352                                        | 0.486752999                                       | 344.1343706                             | 26.57567185                              |
| 0.030070403                                        | 0.518628503                                       | 1980.123625                             | 114.8088004                              |
| 0.043213118                                        | 0.532775263                                       | 1723.527975                             | 139.7944359                              |
| 0.042705653                                        | 0.465951062                                       | 709.6434668                             | 65.04070913                              |
| 0.049297757                                        | 0.446298595                                       | 259.2994836                             | 28.64199656                              |
| 0.038210938                                        | 0.513083849                                       | 1188.815278                             | 88.5347432                               |
| 0.061376147                                        | 0.45049927                                        | 350.4884319                             | 47.75064267                              |
| 0.033178046                                        | 0.506689126                                       | 693.6574142                             | 45.42074507                              |
| 0.037803115                                        | 0.469068995                                       | 705.9488372                             | 56.89368771                              |
| 0.035125539                                        | 0.514151389                                       | 392.2975098                             | 26.80078637                              |
| 0.025526788                                        | 0.550777882                                       | 853.1549387                             | 39.54099419                              |
| 0.064139724                                        | 0.421239276                                       | 146.1700288                             | 22.25648415                              |
| 0.049122924                                        | 0.445923352                                       | 385.7236994                             | 42.49132948                              |
| 0.038152262                                        | 0.488579422                                       | 646.8791541                             | 50.51359517                              |
| 0.033017162                                        | 0.527815205                                       | 644.99018                               | 40.34697218                              |
| 0.045760762                                        | 0.519563579                                       | 368.8901408                             | 32.49014085                              |
| 0.051039053                                        | 0.474410651                                       | 616.7338462                             | 66.35076923                              |
| 0.054242101                                        | 0.447711227                                       | 548.8939641                             | 66.50081566                              |
| 0.033674608                                        | 0.461978562                                       | 613.5075301                             | 44.71987952                              |
| 0.135976805                                        | 0.330612902                                       | 63.80829016                             | 26.2432332                               |
| 0.035622595                                        | 0.485427697                                       | 639.3082764                             | 46.91495824                              |
| 0.04408923                                         | 0.500320804                                       | 629.903892                              | 55.50833995                              |
| 0.043680636                                        | 0.523403819                                       | 400.4039216                             | 33.41568627                              |
| 0.078244598                                        | 0.439152491                                       | 241.0947177                             | 42.95628415                              |
| 0.053315581                                        | 0.476670751                                       | 196.3883495                             | 21.96601942                              |
| 0.038656881                                        | 0.513815988                                       | 696.2206642                             | 52.3800738                               |
| 0.039818692                                        | 0.477879437                                       | 1272.59294                              | 106.0371761                              |
| 0.046096178                                        | 0.437285842                                       | 639.3119015                             | 67.39261286                              |
| 0.038498815                                        | 0.487074616                                       | 1192.35866                              | 94.24509804                              |
| 0.033263705                                        | 0.510224488                                       | 995.4479754                             | 64.89748847                              |
| 0.062103823                                        | 0.448851154                                       | 489.6966086                             | 67.75527039                              |
| 0.051789198                                        | 0.477200127                                       | 219.0348584                             | 23.77124183                              |
| 0.092378319                                        | 0.361056673                                       | 69.68393782                             | 17.82901554                              |
| 0.032610649                                        | 0.496762174                                       | 1508.16996                              | 99.00592885                              |









| wavelet.HLL_gldm_SmallDependenceEmphasis | wavelet.HLL_gldm_DependenceNonUniformityNormalized | wavelet.HLL_gldm_DependenceVariance | wavelet.HLL_gldm_LargeDependenceEmphasis |
|------------------------------------------|----------------------------------------------------|-------------------------------------|------------------------------------------|
| 0.531461852                              | 0.31293722                                         | 1.324809611                         | 5.249764373                              |
| 0.346579506                              | 0.203518545                                        | 2.605274386                         | 10.29625668                              |
| 0.357590754                              | 0.184455259                                        | 6.368925817                         | 16.41460235                              |
| 0.48661964                               | 0.270823621                                        | 1.654782621                         | 6.439099284                              |
| 0.383937684                              | 0.21305505                                         | 2.341004354                         | 9.227195946                              |
| 0.469191973                              | 0.279504132                                        | 1.572222222                         | 6.266666667                              |
| 0.389848448                              | 0.216614521                                        | 3.08614925                          | 10.17996815                              |
| 0.433287981                              | 0.234333234                                        | 2.420753387                         | 8.503523884                              |
| 0.474780253                              | 0.256610192                                        | 2.550040656                         | 8.073471183                              |
| 0.563384243                              | 0.327691649                                        | 1.32198151                          | 5.057835821                              |
| 0.348860859                              | 0.214224402                                        | 2.172558028                         | 9.293103448                              |
| 0.489953696                              | 0.27557879                                         | 2.036960112                         | 6.884598698                              |
| 0.302505751                              | 0.148969974                                        | 5.808906647                         | 18.50723085                              |
| 0.501006354                              | 0.27827552                                         | 1.950487926                         | 6.733255679                              |
| 0.529411716                              | 0.306480066                                        | 1.669126195                         | 5.860887097                              |
| 0.357843873                              | 0.199939883                                        | 3.083986235                         | 10.97166362                              |
| 0.447104724                              | 0.264549997                                        | 1.579940462                         | 6.587939698                              |
| 0.329463533                              | 0.180857061                                        | 3.464046639                         | 12.62043796                              |
| 0.395818516                              | 0.217872227                                        | 2.596005233                         | 9.392912173                              |
| 0.4729881                                | 0.264521959                                        | 1.943723994                         | 7.014233506                              |
| 0.325280949                              | 0.160180855                                        | 6.055261173                         | 17.78769841                              |
| 0.452750966                              | 0.263018567                                        | 1.65145189                          | 6.69416126                               |
| 0.416940266                              | 0.254686356                                        | 1.604431152                         | 6.98828125                               |
| 0.409659343                              | 0.224453084                                        | 2.540841939                         | 9.034000756                              |
| 0.523310593                              | 0.299732371                                        | 1.565797341                         | 5.785549594                              |
| 0.468047052                              | 0.268478934                                        | 1.836057447                         | 6.809202195                              |
| 0.451428737                              | 0.261334431                                        | 1.775096345                         | 6.902876585                              |
| 0.476953226                              | 0.264789915                                        | 1.97703078                          | 7.061549602                              |
| 0.402982811                              | 0.256119594                                        | 1.605943676                         | 7.134228188                              |
| 0.404962764                              | 0.221149224                                        | 2.395507282                         | 8.94352483                               |
| 0.389371798                              | 0.197792139                                        | 4.002593097                         | 12.26187474                              |
| 0.361290757                              | 0.206395311                                        | 2.943589703                         | 10.52537458                              |
| 0.451147471                              | 0.266762839                                        | 1.445255768                         | 6.322390833                              |
| 0.443072382                              | 0.249229153                                        | 2.089723857                         | 7.627234043                              |
| 0.472711927                              | 0.258950042                                        | 2.311826793                         | 7.673932788                              |
| 0.405720271                              | 0.206448165                                        | 3.594535291                         | 11.22274091                              |
| 0.390054591                              | 0.191093845                                        | 4.544646295                         | 13.36495566                              |
| 0.375006866                              | 0.198292787                                        | 5.174803905                         | 13.9920558                               |
| 0.366503735                              | 0.217093                                           | 2.247535197                         | 9.13495935                               |
| 0.414935917                              | 0.242239309                                        | 2.03897315                          | 7.857221458                              |
| 0.359417706                              | 0.188426052                                        | 3.654248075                         | 12.26985351                              |
| 0.562639678                              | 0.334006612                                        | 1.212868744                         | 4.802948022                              |
| 0.396970698                              | 0.213685971                                        | 2.699087835                         | 9.647139338                              |
| 0.466353554                              | 0.274335137                                        | 1.584489795                         | 6.361736334                              |
| 0.440353126                              | 0.249436105                                        | 1.840887439                         | 7.270735524                              |
| 0.439875619                              | 0.252496707                                        | 1.948018222                         | 7.378870674                              |
| 0.417888658                              | 0.227093284                                        | 2.400181935                         | 8.719421306                              |
| 0.429050424                              | 0.239751081                                        | 1.929215531                         | 7.670493685                              |
| 0.53956991                               | 0.307830285                                        | 1.658708011                         | 5.824911868                              |
| 0.394928088                              | 0.210492455                                        | 2.64007519                          | 9.690828402                              |
| 0.421726182                              | 0.240641896                                        | 1.861021634                         | 7.571428571                              |
| 0.466709018                              | 0.275450712                                        | 1.490647232                         | 6.186591516                              |
| 0.475451671                              | 0.267835418                                        | 1.907828926                         | 6.878989362                              |
| 0.3601385                                | 0.18779701                                         | 3.406689771                         | 11.93478261                              |
| 0.477206166                              | 0.255350783                                        | 2.80335406                          | 8.484210526                              |
| 0.388212478                              | 0.222311111                                        | 2.267559763                         | 8.836923077                              |
| 0.442170648                              | 0.249928905                                        | 2.084031164                         | 7.582447466                              |
| 0.382318188                              | 0.222483066                                        | 2.246958211                         | 8.847310584                              |
| 0.398055436                              | 0.22646014                                         | 2.073956959                         | 8.366504854                              |
| 0.453967218                              | 0.245232449                                        | 3.884363941                         | 10.30003286                              |
| 0.435174635                              | 0.249496915                                        | 1.677476532                         | 7.046432616                              |
| 0.506470636                              | 0.294293089                                        | 1.436754057                         | 5.707865169                              |
| 0.394725352                              | 0.2123862                                          | 2.815491917                         | 9.885817931                              |
| 0.410917766                              | 0.238308901                                        | 1.891591395                         | 7.73488128                               |
| 0.427650903                              | 0.221352347                                        | 2.620182663                         | 9.210126582                              |
| 0.419866627                              | 0.222535314                                        | 2.934499422                         | 9.636457794                              |
| 0.422897638                              | 0.22696446                                         | 2.615320016                         | 9.042944785                              |
| 0.452137876                              | 0.259249254                                        | 1.80386304                          | 6.97312                                  |
| 0.476637507                              | 0.263138085                                        | 1.928884093                         | 7.008878265                              |
| 0.331667567                              | 0.192377028                                        | 2.983912658                         | 11.39751553                              |
| 0.373621419                              | 0.217867004                                        | 2.514324692                         | 9.441878368                              |
| 0.389296578                              | 0.216071419                                        | 2.687200135                         | 9.613053613                              |
| 0.45260695                               | 0.24247773                                         | 2.901849325                         | 8.989469065                              |
| 0.448059903                              | 0.250396378                                        | 1.90462742                          | 7.316069057                              |
| 0.414514503                              | 0.233595572                                        | 2.620422331                         | 8.911210476                              |
| 0.410852636                              | 0.241337417                                        | 1.770687254                         | 7.499254844                              |
| 0.403485085                              | 0.223137617                                        | 2.453141853                         | 8.98163606                               |
| 0.356112759                              | 0.185635959                                        | 4.058437681                         | 13.03340292                              |
| 0.408804541                              | 0.240726613                                        | 1.86336629                          | 7.669009959                              |
| 0.458357101                              | 0.274064824                                        | 1.480567897                         | 6.244121419                              |
| 0.533868237                              | 0.315629123                                        | 1.286513734                         | 5.156862745                              |
| 0.435010482                              | 0.232213808                                        | 3.210685573                         | 9.745969983                              |
| 0.484146381                              | 0.265793285                                        | 2.799582758                         | 8.160599572                              |
| 0.401218873                              | 0.222930176                                        | 2.473038692                         | 9.020175724                              |
| 0.437658139                              | 0.249586928                                        | 1.829974208                         | 7.259122591                              |
| 0.298734896                              | 0.162221605                                        | 4.111669928                         | 14.99477807                              |
| 0.416009696                              | 0.241865081                                        | 2.511555714                         | 8.509433962                              |
| 0.424708617                              | 0.220258283                                        | 3.101219329                         | 9.969365427                              |
| 0.430708559                              | 0.239218475                                        | 2.013549225                         | 7.781420765                              |
| 0.447551888                              | 0.241330773                                        | 2.563196098                         | 8.507160494                              |
| 0.317417597                              | 0.172884753                                        | 3.739035624                         | 13.57668712                              |
| 0.473142272                              | 0.27220139                                         | 1.545981229                         | 6.289672544                              |
| 0.442109796                              | 0.252949086                                        | 1.856791945                         | 7.214547559                              |
| 0.422950678                              | 0.244163636                                        | 1.848798531                         | 7.475757576                              |
| 0.444569284                              | 0.24712818                                         | 1.994833342                         | 7.522518382                              |
| 0.455403922                              | 0.246270309                                        | 2.540825497                         | 8.310929281                              |
| 0.456842445                              | 0.251916044                                        | 2.261263547                         | 7.778842741                              |
| 0.387707571                              | 0.197041805                                        | 3.834841714                         | 12.00668577                              |
| 0.422150927                              | 0.23135736                                         | 2.256560219                         | 8.381294964                              |
| 0.355159611                              | 0.197546567                                        | 2.860352818                         | 10.75164531                              |

| wavelet.HLL_gldm_LargeDependenceLowGrayLevelEmphasis | wavelet.HLL_gldm_SmallDependenceHighGrayLevelEmphasis | wavelet.HLL_gldm_LargeDependenceHighGrayLevelEmphasis |
|------------------------------------------------------|-------------------------------------------------------|-------------------------------------------------------|
| 0.009231994                                          | 391.8033391                                           | 3984.910462                                           |
| 0.045352068                                          | 106.7190644                                           | 2729.856684                                           |
| 0.053714392                                          | 127.8859559                                           | 5312.882008                                           |
| 0.008635628                                          | 547.6383387                                           | 6873.166837                                           |
| 0.026975884                                          | 173.952037                                            | 3579.916807                                           |
| 0.011418364                                          | 343.1362178                                           | 4632.363636                                           |
| 0.020056695                                          | 215.9554495                                           | 5546.471598                                           |
| 0.005671857                                          | 779.1712679                                           | 14397.84436                                           |
| 0.003189467                                          | 1628.196855                                           | 27280.75671                                           |
| 0.005716388                                          | 704.5570495                                           | 6428.98694                                            |
| 0.028778136                                          | 128.359343                                            | 3350.68634                                            |
| 0.006736999                                          | 747.8042879                                           | 10597.82213                                           |
| 0.019095355                                          | 330.3990513                                           | 18833.1955                                            |
| 0.003166674                                          | 1423.119938                                           | 18965.33023                                           |
| 0.003056841                                          | 1375.215628                                           | 15199.87853                                           |
| 0.029806931                                          | 155.1603698                                           | 4558.598035                                           |
| 0.022991285                                          | 161.273644                                            | 2331.021776                                           |
| 0.026962776                                          | 172.3646148                                           | 6510.870235                                           |
| 0.010049828                                          | 420.6820222                                           | 10278.01079                                           |
| 0.001521883                                          | 2697.591958                                           | 39189.24389                                           |
| 0.039165504                                          | 184.5104249                                           | 8802.934193                                           |
| 0.016685902                                          | 224.2054787                                           | 3258.482854                                           |
| 0.054879113                                          | 105.6507476                                           | 1816.548828                                           |
| 0.012772098                                          | 342.7870525                                           | 7215.788062                                           |
| 0.003677319                                          | 1197.944481                                           | 13021.22152                                           |
| 0.00730617                                           | 526.6951161                                           | 7332.229633                                           |
| 0.014655797                                          | 280.9104015                                           | 4078.941231                                           |
| 0.00453031                                           | 900.1465197                                           | 13259.00145                                           |
| 0.061607641                                          | 81.2228854                                            | 1307.232662                                           |
| 0.008735201                                          | 453.5496855                                           | 10151.09153                                           |
| 0.006050151                                          | 888.9562019                                           | 26545.07966                                           |
| 0.01848551                                           | 219.097731                                            | 6587.938134                                           |
| 0.009165127                                          | 359.7760467                                           | 4993.081759                                           |
| 0.020478349                                          | 215.2211678                                           | 3771.708085                                           |
| 0.002589416                                          | 1593.376684                                           | 25726.74818                                           |
| 0.007465808                                          | 716.6210488                                           | 18392.6142                                            |
| 0.003188704                                          | 1822.012044                                           | 61810.28433                                           |
| 0.016549701                                          | 380.0890581                                           | 13541.78744                                           |
| 0.025963984                                          | 150.6820426                                           | 3787.409756                                           |
| 0.01161585                                           | 313.6941544                                           | 5762.396699                                           |
| 0.010166187                                          | 469.8046007                                           | 16092.48342                                           |
| 0.00293868                                           | 1129.718669                                           | 9646.211016                                           |
| 0.015943205                                          | 300.012269                                            | 6802.683274                                           |
| 0.015617137                                          | 237.2790751                                           | 3199.698955                                           |
| 0.018208218                                          | 212.2822254                                           | 3511.100939                                           |
| 0.011334522                                          | 330.822815                                            | 5585.909654                                           |
| 0.002345375                                          | 1777.77378                                            | 36340.10653                                           |
| 0.009123963                                          | 418.3461784                                           | 7919.910448                                           |
| 0.00546731                                           | 824.8236493                                           | 8956.989424                                           |
| 0.01879184                                           | 276.625229                                            | 6411.589497                                           |
| 0.009498743                                          | 374.1968812                                           | 6886.898793                                           |
| 0.005794512                                          | 570.7912422                                           | 7427.124295                                           |
| 0.005135969                                          | 758.3391161                                           | 10915.90758                                           |
| 0.028134839                                          | 200.4563709                                           | 5638.269928                                           |
| 0.011679871                                          | 490.8146009                                           | 7789.95188                                            |
| 0.028123341                                          | 152.8884658                                           | 3353.48359                                            |
| 0.008757717                                          | 418.2005604                                           | 7148.507046                                           |
| 0.023285379                                          | 168.0894581                                           | 3799.273858                                           |
| 0.020634387                                          | 179.9778006                                           | 3813.175971                                           |
| 0.006407816                                          | 809.1030708                                           | 17524.52656                                           |
| 0.009819703                                          | 347.1175834                                           | 5653.661382                                           |
| 0.004758031                                          | 777.2673962                                           | 8441.102622                                           |
| 0.011534843                                          | 372.8406592                                           | 9140.287096                                           |
| 0.006289912                                          | 527.5425688                                           | 10063.60317                                           |
| 0.003898371                                          | 1781.581597                                           | 37704.12025                                           |
| 0.006683721                                          | 692.3796362                                           | 15115.6059                                            |
| 0.015768911                                          | 275.2232867                                           | 5787.421012                                           |
| 0.005381728                                          | 627.0894357                                           | 9716.2848                                             |
| 0.005468198                                          | 675.2468523                                           | 10052.82192                                           |
| 0.035482966                                          | 113.1895701                                           | 4011.201173                                           |
| 0.023270805                                          | 180.8601651                                           | 4450.287914                                           |
| 0.008441858                                          | 478.6839267                                           | 11679.47156                                           |
| 0.010680606                                          | 496.1196223                                           | 9006.168934                                           |
| 0.017268539                                          | 232.0806273                                           | 3651.50996                                            |
| 0.018828172                                          | 227.4347888                                           | 4709.186202                                           |
| 0.02764232                                           | 154.6622962                                           | 2764.651267                                           |
| 0.004860333                                          | 833.8991557                                           | 18499.68322                                           |
| 0.01996979                                           | 262.4974381                                           | 9592.884134                                           |
| 0.009438144                                          | 378.5707487                                           | 7300.968366                                           |
| 0.008811657                                          | 361.306238                                            | 5129.577597                                           |
| 0.009206712                                          | 392.7556914                                           | 3915.64907                                            |
| 0.008517592                                          | 570.8220287                                           | 12872.44969                                           |
| 0.004326946                                          | 1113.630976                                           | 17660.93821                                           |
| 0.028006913                                          | 167.1036656                                           | 3643.883501                                           |
| 0.01796557                                           | 217.9072424                                           | 3561.061501                                           |
| 0.021058481                                          | 210.2111882                                           | 11504.83747                                           |
| 0.01680018                                           | 246.2592106                                           | 4951.031447                                           |
| 0.011186473                                          | 460.6207873                                           | 10127.87819                                           |
| 0.0056234                                            | 733.3018245                                           | 13261.77049                                           |
| 0.004926203                                          | 877.8589334                                           | 17012.11259                                           |
| 0.022467163                                          | 207.9624232                                           | 8754.641104                                           |
| 0.010377881                                          | 343.0118891                                           | 4511.937028                                           |
| 0.009815513                                          | 358.4217609                                           | 5808.876519                                           |
| 0.019043987                                          | 202.8011473                                           | 3503.604848                                           |
| 0.008972033                                          | 412.7422366                                           | 7002.20864                                            |
| 0.005818663                                          | 731.1975844                                           | 13180.43454                                           |
| 0.008919817                                          | 460.5425768                                           | 7968.777778                                           |
| 0.008441489                                          | 646.3124151                                           | 20332.26743                                           |
| 0.010294644                                          | 426.2403266                                           | 8674.517986                                           |
| 0.017886119                                          | 228.5644712                                           | 6888.00866                                            |

| wavelet.HLL_gldm_SmallDependenceLowGrayLevelEmphasis | wavelet.HLL_gldm_LowGrayLevelEmphasis | wavelet.HLL_gldm_DistanceZoneVariabilityNormalized | wavelet.HLL_gldm_LowIntensityEmphasis |
|------------------------------------------------------|---------------------------------------|----------------------------------------------------|---------------------------------------|
| 0.0020491                                            | 0.002795346                           | 0.998453211                                        | 0.003584262                           |
| 0.004635657                                          | 0.007327306                           | 1                                                  | 0.012106878                           |
| 0.002210274                                          | 0.004210256                           | 1                                                  | 0.005845964                           |
| 0.002133554                                          | 0.002733288                           | 1                                                  | 0.003976885                           |
| 0.002165278                                          | 0.00393253                            | 1                                                  | 0.005340584                           |
| 0.003012108                                          | 0.003813148                           | 1                                                  | 0.005698131                           |
| 0.001191775                                          | 0.002400442                           | 0.990543949                                        | 0.002950815                           |
| 0.000645534                                          | 0.001011536                           | 0.998424578                                        | 0.001390172                           |
| 0.000883758                                          | 0.001044958                           | 1                                                  | 0.001671015                           |
| 0.001690146                                          | 0.002116682                           | 1                                                  | 0.002769206                           |
| 0.002047065                                          | 0.00404247                            | 1                                                  | 0.005452191                           |
| 0.002065903                                          | 0.002490008                           | 0.993860381                                        | 0.003803531                           |
| 0.000995397                                          | 0.001694158                           | 1                                                  | 0.003083653                           |
| 0.00089616                                           | 0.00108109                            | 1                                                  | 0.001619236                           |
| 0.000902155                                          | 0.00109659                            | 1                                                  | 0.00154246                            |
| 0.002192009                                          | 0.0039221                             | 1                                                  | 0.005818704                           |
| 0.0031896                                            | 0.005044018                           | 1                                                  | 0.006635436                           |
| 0.002179272                                          | 0.003570019                           | 1                                                  | 0.006103795                           |
| 0.001454038                                          | 0.002058807                           | 1                                                  | 0.003321792                           |
| 0.000334614                                          | 0.000430372                           | 0.998576006                                        | 0.000642394                           |
| 0.001748921                                          | 0.003340945                           | 0.998190047                                        | 0.005148563                           |
| 0.002451878                                          | 0.003786295                           | 0.993079668                                        | 0.005018598                           |
| 0.00638378                                           | 0.011865182                           | 1                                                  | 0.014770343                           |
| 0.001183801                                          | 0.002011326                           | 1                                                  | 0.002734832                           |
| 0.001192763                                          | 0.001421708                           | 1                                                  | 0.002071009                           |
| 0.001052618                                          | 0.001594777                           | 1                                                  | 0.002098174                           |
| 0.001998967                                          | 0.003129575                           | 1                                                  | 0.004149397                           |
| 0.000824502                                          | 0.001131369                           | 1                                                  | 0.001586902                           |
| 0.013811692                                          | 0.018616335                           | 1                                                  | 0.030146603                           |
| 0.000990373                                          | 0.001536016                           | 1                                                  | 0.002265547                           |
| 0.00047232                                           | 0.000761666                           | 1                                                  | 0.001130669                           |
| 0.001309166                                          | 0.002446467                           | 0.997703792                                        | 0.003407898                           |
| 0.001137567                                          | 0.001913018                           | 0.998817268                                        | 0.002386477                           |
| 0.002785683                                          | 0.004351512                           | 1                                                  | 0.005095293                           |
| 0.000396765                                          | 0.000558527                           | 0.994974906                                        | 0.000773027                           |
| 0.000662677                                          | 0.001042779                           | 0.997047977                                        | 0.001537448                           |
| 0.000368337                                          | 0.000501488                           | 1                                                  | 0.000875439                           |
| 0.00059027                                           | 0.00155375                            | 0.992869966                                        | 0.001738708                           |
| 0.002524884                                          | 0.004413186                           | 1                                                  | 0.006527893                           |
| 0.00085088                                           | 0.001716681                           | 0.998289625                                        | 0.001983151                           |
| 0.000783255                                          | 0.001310317                           | 1                                                  | 0.002046959                           |
| 0.000659491                                          | 0.000898501                           | 0.995971008                                        | 0.001098215                           |
| 0.001916327                                          | 0.002886148                           | 1                                                  | 0.004474495                           |
| 0.002144766                                          | 0.003464052                           | 1                                                  | 0.00435533                            |
| 0.00276931                                           | 0.004099318                           | 1                                                  | 0.005817922                           |
| 0.001348536                                          | 0.002184327                           | 1                                                  | 0.002863332                           |
| 0.000331812                                          | 0.000473156                           | 1                                                  | 0.000725688                           |
| 0.001816696                                          | 0.002411478                           | 1                                                  | 0.003793119                           |
| 0.001738938                                          | 0.002085546                           | 1                                                  | 0.002897749                           |
| 0.003703119                                          | 0.00475009                            | 0.993558843                                        | 0.008372654                           |
| 0.001025954                                          | 0.001740196                           | 1                                                  | 0.002289002                           |
| 0.000772789                                          | 0.001243838                           | 1                                                  | 0.001552455                           |
| 0.00091507                                           | 0.001267978                           | 0.998377941                                        | 0.001768507                           |
| 0.002208104                                          | 0.003667444                           | 1                                                  | 0.005640114                           |
| 0.001848358                                          | 0.002553446                           | 1                                                  | 0.003580287                           |
| 0.002412913                                          | 0.004547812                           | 1                                                  | 0.006075902                           |
| 0.000822833                                          | 0.001459667                           | 0.999028183                                        | 0.00177823                            |
| 0.001667281                                          | 0.00332639                            | 1                                                  | 0.004183417                           |
| 0.002018957                                          | 0.003460299                           | 1                                                  | 0.004774002                           |
| 0.000449087                                          | 0.00078149                            | 0.99749583                                         | 0.000941014                           |
| 0.001258487                                          | 0.00199499                            | 0.995470012                                        | 0.00269431                            |
| 0.001002881                                          | 0.001366739                           | 0.998716303                                        | 0.001821276                           |
| 0.000842311                                          | 0.001553216                           | 0.990705083                                        | 0.002051915                           |
| 0.000498071                                          | 0.000970704                           | 0.980771043                                        | 0.001163173                           |
| 0.001725533                                          | 0.001865578                           | 1                                                  | 0.003570378                           |
| 0.000640083                                          | 0.001024693                           | 0.984995498                                        | 0.001422261                           |
| 0.001687995                                          | 0.0026625                             | 1                                                  | 0.003759662                           |
| 0.000542907                                          | 0.000955742                           | 0.992053916                                        | 0.001145482                           |
| 0.000660446                                          | 0.001062539                           | 1                                                  | 0.001320191                           |
| 0.001832912                                          | 0.00396634                            | 1                                                  | 0.005336317                           |
| 0.002369519                                          | 0.003828144                           | 1                                                  | 0.005835674                           |
| 0.000615497                                          | 0.00113832                            | 0.995811537                                        | 0.001496835                           |
| 0.001292133                                          | 0.001953956                           | 1                                                  | 0.002665233                           |
| 0.002133439                                          | 0.003426845                           | 0.998272886                                        | 0.004506091                           |
| 0.00153655                                           | 0.002797386                           | 0.996023873                                        | 0.003531245                           |
| 0.003036721                                          | 0.005489454                           | 1                                                  | 0.007175578                           |
| 0.000638667                                          | 0.000935095                           | 1                                                  | 0.001453757                           |
| 0.002304355                                          | 0.003219349                           | 1                                                  | 0.00584512                            |
| 0.001392465                                          | 0.002073507                           | 1                                                  | 0.003094758                           |
| 0.001240284                                          | 0.001972585                           | 1                                                  | 0.002510479                           |
| 0.002103753                                          | 0.002851893                           | 1                                                  | 0.003652429                           |
| 0.001179835                                          | 0.001645333                           | 1                                                  | 0.002485217                           |
| 0.000597926                                          | 0.000847833                           | 0.996714138                                        | 0.001137561                           |
| 0.002406237                                          | 0.004489496                           | 1                                                  | 0.00584541                            |
| 0.001918474                                          | 0.003326276                           | 0.996781987                                        | 0.004171307                           |
| 0.001503272                                          | 0.002475545                           | 1                                                  | 0.004674264                           |
| 0.001633808                                          | 0.002818863                           | 0.998265396                                        | 0.003726883                           |
| 0.001215141                                          | 0.001842157                           | 1                                                  | 0.002674883                           |
| 0.001104451                                          | 0.001474744                           | 1                                                  | 0.002292426                           |
| 0.0008182                                            | 0.001107393                           | 1                                                  | 0.001672245                           |
| 0.001370164                                          | 0.002476113                           | 0.991614404                                        | 0.003995182                           |
| 0.001491886                                          | 0.002316656                           | 0.998463903                                        | 0.002949838                           |
| 0.000903749                                          | 0.001661005                           | 0.992455785                                        | 0.001969824                           |
| 0.001769625                                          | 0.003303033                           | 1                                                  | 0.004048502                           |
| 0.000881033                                          | 0.001535228                           | 0.998186765                                        | 0.001896775                           |
| 0.000677633                                          | 0.001040492                           | 0.994375748                                        | 0.001394185                           |
| 0.001257125                                          | 0.001864764                           | 1                                                  | 0.00255326                            |
| 0.00129611                                           | 0.001709321                           | 1                                                  | 0.003031052                           |
| 0.001954575                                          | 0.002610273                           | 1                                                  | 0.004199574                           |
| 0.000922401                                          | 0.002001561                           | 0.996550247                                        | 0.002513756                           |



| wavelet.HLL_gldzm_LargeDistanceEmphasis | wavelet.HLL_gldzm_HighIntensitySmallDistanceEmphasis | wavelet.HLL_gldzm_LowIntensityLargeDistanceEmphasis | wavelet.HLL_gldzm_HighIntensityEmphasis |
|-----------------------------------------|------------------------------------------------------|-----------------------------------------------------|-----------------------------------------|
| 1.002321981                             | 740.4661378                                          | 0.003587447                                         | 740.8893189                             |
| 1                                       | 309.7260638                                          | 0.012106878                                         | 309.7260638                             |
| 1                                       | 361.5145631                                          | 0.005845964                                         | 361.5145631                             |
| 1                                       | 1124.185455                                          | 0.003976885                                         | 1124.185455                             |
| 1                                       | 451.9137597                                          | 0.005340584                                         | 451.9137597                             |
| 1                                       | 736.771978                                           | 0.005698131                                         | 736.771978                              |
| 1.014251781                             | 552.2781077                                          | 0.002988835                                         | 554.1005542                             |
| 1.002364998                             | 1804.556169                                          | 0.001391453                                         | 1805.64998                              |
| 1                                       | 3442.257108                                          | 0.001671015                                         | 3442.257108                             |
| 1                                       | 1256.0131                                            | 0.002769206                                         | 1256.0131                               |
| 1                                       | 367.911859                                           | 0.005452191                                         | 367.911859                              |
| 1.009237875                             | 1527.135681                                          | 0.003807822                                         | 1532.207852                             |
| 1                                       | 1092.56891                                           | 0.003083653                                         | 1092.56891                              |
| 1                                       | 2844.514315                                          | 0.001619236                                         | 2844.514315                             |
| 1                                       | 2613.480033                                          | 0.00154246                                          | 2613.480033                             |
| 1                                       | 436.2887244                                          | 0.005818704                                         | 436.2887244                             |
| 1                                       | 360.6925566                                          | 0.006635436                                         | 360.6925566                             |
| 1                                       | 522.6328294                                          | 0.006103795                                         | 522.6328294                             |
| 1                                       | 1074.172819                                          | 0.003321792                                         | 1074.172819                             |
| 1.002137513                             | 5703.130923                                          | 0.000642856                                         | 5705.602423                             |
| 1.002717391                             | 568.3806612                                          | 0.00515229                                          | 568.8759058                             |
| 1.010416667                             | 492.6206597                                          | 0.005089091                                         | 493.8211806                             |
| 1                                       | 252.3253968                                          | 0.014770343                                         | 252.3253968                             |
| 1                                       | 839.7164782                                          | 0.002734832                                         | 839.7164782                             |
| 1                                       | 2302.460927                                          | 0.002071009                                         | 2302.460927                             |
| 1                                       | 1121.485086                                          | 0.002098174                                         | 1121.485086                             |
| 1                                       | 620.7995255                                          | 0.004149397                                         | 620.7995255                             |
| 1                                       | 1889.819142                                          | 0.001586902                                         | 1889.819142                             |
| 1                                       | 200.4147465                                          | 0.030146603                                         | 200.4147465                             |
| 1                                       | 1124.276371                                          | 0.002265547                                         | 1124.276371                             |
| 1                                       | 2285.573614                                          | 0.001130669                                         | 2285.573614                             |
| 1.003448276                             | 607.1494253                                          | 0.003413884                                         | 607.645977                              |
| 1.001775148                             | 794.0557692                                          | 0.002388588                                         | 794.4289941                             |
| 1                                       | 483.960199                                           | 0.005905293                                         | 483.960199                              |
| 1.007556675                             | 3375.911314                                          | 0.000775252                                         | 3382.793871                             |
| 1.00443459                              | 1770.652809                                          | 0.001539954                                         | 1772.797487                             |
| 1                                       | 4676.069159                                          | 0.000875439                                         | 4676.069159                             |
| 1.010733453                             | 1015.776163                                          | 0.00175378                                          | 1018.792934                             |
| 1                                       | 411.2303263                                          | 0.006527893                                         | 411.2303263                             |
| 1.00256776                              | 754.7013552                                          | 0.001990548                                         | 755.0114123                             |
| 1                                       | 1309.85086                                           | 0.002046959                                         | 1309.85086                              |
| 1.006055713                             | 2008.684195                                          | 0.001102565                                         | 2011.485264                             |
| 1                                       | 752.8439201                                          | 0.004474495                                         | 752.8439201                             |
| 1                                       | 508.5189591                                          | 0.00435533                                          | 508.5189591                             |
| 1                                       | 482.4559505                                          | 0.005817922                                         | 482.4559505                             |
| 1                                       | 757.2427046                                          | 0.002863332                                         | 757.2427046                             |
| 1                                       | 4254.389348                                          | 0.000725688                                         | 4254.389348                             |
| 1                                       | 981.9013761                                          | 0.003793119                                         | 981.9013761                             |
| 1                                       | 1533.073585                                          | 0.002897749                                         | 1533.073585                             |
| 1.009693053                             | 702.7988691                                          | 0.008385002                                         | 705.2827141                             |
| 1                                       | 890.1207729                                          | 0.002289002                                         | 890.1207729                             |
| 1                                       | 1225.15                                              | 0.001552455                                         | 1225.15                                 |
| 1.002435065                             | 1596.277293                                          | 0.001770158                                         | 1597.181006                             |
| 1                                       | 554.8577681                                          | 0.005640114                                         | 554.8577681                             |
| 1                                       | 1026.780521                                          | 0.003580287                                         | 1026.780521                             |
| 1                                       | 392.6704937                                          | 0.006075902                                         | 392.6704937                             |
| 1.001458435                             | 948.0243072                                          | 0.001781876                                         | 948.1701507                             |
| 1                                       | 438.5120836                                          | 0.004183417                                         | 438.5120836                             |
| 1                                       | 454.2684564                                          | 0.004774002                                         | 454.2684564                             |
| 1.003760969                             | 1782.186011                                          | 0.000943356                                         | 1783.910573                             |
| 1.006810443                             | 800.0238365                                          | 0.00270513                                          | 801.2020431                             |
| 1.001926782                             | 1532.08799                                           | 0.001822943                                         | 1532.64483                              |
| 1.014007782                             | 941.2065175                                          | 0.002067582                                         | 945.2801556                             |
| 1.029126214                             | 1276.876144                                          | 0.001188845                                         | 1286.035506                             |
| 1                                       | 4183.496104                                          | 0.003570378                                         | 4183.496104                             |
| 1.022678186                             | 1637.178591                                          | 0.001440698                                         | 1647.593952                             |
| 1                                       | 651.1017771                                          | 0.003759662                                         | 651.1017771                             |
| 1.011966861                             | 1382.217935                                          | 0.001153606                                         | 1387.186253                             |
| 1                                       | 1417.732518                                          | 0.001320191                                         | 1417.732518                             |
| 1                                       | 342.193578                                           | 0.005336317                                         | 342.193578                              |
| 1                                       | 488.2230216                                          | 0.005835674                                         | 488.2230216                             |
| 1.006295908                             | 1230.204224                                          | 0.001503767                                         | 1231.647954                             |
| 1                                       | 1090.994118                                          | 0.002665233                                         | 1090.994118                             |
| 1.002592913                             | 512.9896283                                          | 0.004509399                                         | 513.4978392                             |
| 1.005976096                             | 545.8240372                                          | 0.003544514                                         | 546.6786189                             |
| 1                                       | 375.0659509                                          | 0.007175578                                         | 375.0659509                             |
| 1                                       | 2062.626364                                          | 0.001453757                                         | 2062.626364                             |
| 1                                       | 740.8516624                                          | 0.00584512                                          | 740.8516624                             |
| 1                                       | 929.2848411                                          | 0.003094758                                         | 929.2848411                             |
| 1                                       | 790.5141956                                          | 0.002510479                                         | 790.5141956                             |
| 1                                       | 739.3210483                                          | 0.003652429                                         | 739.3210483                             |
| 1                                       | 1322.080357                                          | 0.002485217                                         | 1322.080357                             |
| 1.004936917                             | 2309.369857                                          | 0.001140021                                         | 2311.876577                             |
| 1                                       | 416.5253648                                          | 0.00584541                                          | 416.5253648                             |
| 1.004834811                             | 496.2677276                                          | 0.004194369                                         | 496.8146656                             |
| 1                                       | 705.9902534                                          | 0.004674264                                         | 705.9902534                             |
| 1.002604167                             | 592.203125                                           | 0.003729136                                         | 592.9557292                             |
| 1                                       | 1089.098935                                          | 0.00267483                                          | 1089.098935                             |
| 1                                       | 1700.987854                                          | 0.002292426                                         | 1700.987854                             |
| 1                                       | 1964.745402                                          | 0.001672245                                         | 1964.745402                             |
| 1.012631579                             | 655.8073684                                          | 0.004023825                                         | 657.2                                   |
| 1.002305919                             | 728.0109531                                          | 0.002957817                                         | 728.1775557                             |
| 1.011359334                             | 807.9166982                                          | 0.001985439                                         | 810.2794396                             |
| 1                                       | 480.027027                                           | 0.004048502                                         | 480.027027                              |
| 1.002722323                             | 929.1669691                                          | 0.001900802                                         | 929.6270417                             |
| 1.008460237                             | 1602.650169                                          | 0.00140078                                          | 1605.780034                             |
| 1                                       | 1010.453629                                          | 0.00255326                                          | 1010.453629                             |
| 1                                       | 1666.533333                                          | 0.003031052                                         | 1666.533333                             |
| 1                                       | 1020.741379                                          | 0.004199574                                         | 1020.741379                             |
| 1.005183585                             | 643.6649028                                          | 0.002524607                                         | 644.3935205                             |

| wavelet.HLL_gldzm_DistanceZoneVariability | wavelet.HLL_gldzm_ZonePercentage | wavelet.HLL_gldzm_IntensityVariabilityNormalized | wavelet.HLL_gldzm_LowIntensitySmallDistanceEmphasis | wavelet.HLL_gldzm_IntensityVariability |
|-------------------------------------------|----------------------------------|--------------------------------------------------|-----------------------------------------------------|----------------------------------------|
| 1290.001548                               | 0.608859566                      | 0.037016314                                      | 0.003583466                                         | 47.8250774                             |
| 376                                       | 0.402139037                      | 0.058298438                                      | 0.012106878                                         | 21.9202177                             |
| 618                                       | 0.402868318                      | 0.057325541                                      | 0.005845964                                         | 35.42718447                            |
| 550                                       | 0.562947799                      | 0.0336                                           | 0.003976885                                         | 18.48                                  |
| 1032                                      | 0.435810811                      | 0.046791434                                      | 0.005340584                                         | 48.28875969                            |
| 364                                       | 0.551515152                      | 0.044197561                                      | 0.005698131                                         | 16.08791209                            |
| 2502.114014                               | 0.447000531                      | 0.051797647                                      | 0.002941309                                         | 130.8408551                            |
| 2533.003153                               | 0.496671887                      | 0.035551566                                      | 0.001389851                                         | 90.194324                              |
| 2462                                      | 0.541575011                      | 0.030682788                                      | 0.001671015                                         | 75.54102356                            |
| 687                                       | 0.640858209                      | 0.035152732                                      | 0.002769206                                         | 24.14992722                            |
| 624                                       | 0.413793103                      | 0.060799844                                      | 0.005452191                                         | 37.93910256                            |
| 1291.024634                               | 0.563557484                      | 0.037793625                                      | 0.003802458                                         | 49.0939184                             |
| 624                                       | 0.334226031                      | 0.049170981                                      | 0.003083653                                         | 30.68269231                            |
| 978                                       | 0.569598136                      | 0.031452695                                      | 0.001619236                                         | 30.7607362                             |
| 1202                                      | 0.605846774                      | 0.02655862                                       | 0.00154246                                          | 31.9234609                             |
| 1756                                      | 0.401279707                      | 0.047556442                                      | 0.005818704                                         | 83.50911162                            |
| 618                                       | 0.51758794                       | 0.049543888                                      | 0.006635436                                         | 30.61812298                            |
| 463                                       | 0.375506894                      | 0.049806642                                      | 0.006103795                                         | 23.06047516                            |
| 596                                       | 0.459167951                      | 0.044620738                                      | 0.003321792                                         | 26.59395973                            |
| 2803.00285                                | 0.539911521                      | 0.033840662                                      | 0.000642278                                         | 94.99073744                            |
| 1102.001812                               | 0.365079365                      | 0.046571427                                      | 0.005147631                                         | 51.41485507                            |
| 572.0138889                               | 0.533827618                      | 0.046501254                                      | 0.005000974                                         | 26.78472222                            |
| 504                                       | 0.4921875                        | 0.05098914                                       | 0.014770343                                         | 25.6984127                             |
| 1238                                      | 0.467699282                      | 0.043963243                                      | 0.002734832                                         | 54.42649435                            |
| 755                                       | 0.593087196                      | 0.0277218104                                     | 0.002071009                                         | 20.54966887                            |
| 1274                                      | 0.537779654                      | 0.037818315                                      | 0.002098174                                         | 48.18053375                            |
| 1686                                      | 0.521497062                      | 0.040714896                                      | 0.004149397                                         | 68.64531435                            |
| 1515                                      | 0.548515568                      | 0.033029877                                      | 0.001586902                                         | 50.04026403                            |
| 217                                       | 0.485458613                      | 0.057488687                                      | 0.030146603                                         | 12.47465438                            |
| 948                                       | 0.461538462                      | 0.046718386                                      | 0.002265547                                         | 44.28902954                            |
| 2092                                      | 0.439680538                      | 0.037951186                                      | 0.001130669                                         | 79.39388145                            |
| 868.0022989                               | 0.420492992                      | 0.051586735                                      | 0.003406401                                         | 44.88045977                            |
| 1688.001183                               | 0.523381852                      | 0.044333182                                      | 0.002385949                                         | 74.92307692                            |
| 1206                                      | 0.513191489                      | 0.04119535                                       | 0.005905293                                         | 49.68159204                            |
| 2370.030227                               | 0.540871935                      | 0.03365854                                       | 0.000772471                                         | 80.17464316                            |
| 1349.005913                               | 0.451150383                      | 0.03581595                                       | 0.001536821                                         | 48.45898004                            |
| 1605                                      | 0.431335662                      | 0.03744723                                       | 0.000875439                                         | 60.10280374                            |
| 2220.057245                               | 0.43324937                       | 0.043454642                                      | 0.00173494                                          | 97.16457961                            |
| 521                                       | 0.423577236                      | 0.055337992                                      | 0.006527893                                         | 28.83109405                            |
| 3499.005136                               | 0.482118294                      | 0.048280813                                      | 0.001981302                                         | 169.2242511                            |
| 1046                                      | 0.403238242                      | 0.039602748                                      | 0.002046959                                         | 41.42447419                            |
| 2467.020186                               | 0.640548229                      | 0.032859595                                      | 0.001097128                                         | 81.3932176                             |
| 1653                                      | 0.452504791                      | 0.043274664                                      | 0.004474495                                         | 71.53599516                            |
| 1345                                      | 0.540594855                      | 0.042860104                                      | 0.00435533                                          | 57.64684015                            |
| 647                                       | 0.506259781                      | 0.048257443                                      | 0.005817922                                         | 31.22256569                            |
| 1405                                      | 0.511839709                      | 0.041404238                                      | 0.002863332                                         | 58.17295374                            |
| 2178                                      | 0.477422183                      | 0.039956287                                      | 0.000725688                                         | 87.02479339                            |
| 436                                       | 0.500574053                      | 0.046660635                                      | 0.003793119                                         | 20.3440367                             |
| 530                                       | 0.62279671                       | 0.035535778                                      | 0.002897749                                         | 18.83396226                            |
| 615.0129241                               | 0.457840237                      | 0.043498686                                      | 0.008369567                                         | 26.92568659                            |
| 1242                                      | 0.483456598                      | 0.046477164                                      | 0.002289002                                         | 57.72463768                            |
| 1820                                      | 0.53989914                       | 0.043945176                                      | 0.001552455                                         | 79.98021978                            |
| 2460.003247                               | 0.546099291                      | 0.036225544                                      | 0.001768095                                         | 89.25974026                            |
| 457                                       | 0.413949275                      | 0.048106527                                      | 0.005640114                                         | 21.98468271                            |
| 729                                       | 0.548120301                      | 0.03307799                                       | 0.003580287                                         | 24.1138546                             |
| 871                                       | 0.446666667                      | 0.052793087                                      | 0.006075902                                         | 45.98277842                            |
| 2055.000972                               | 0.508529048                      | 0.046753335                                      | 0.001777318                                         | 96.17160914                            |
| 1531                                      | 0.442741469                      | 0.050286246                                      | 0.004183417                                         | 76.98824298                            |
| 745                                       | 0.452063107                      | 0.051062565                                      | 0.004774002                                         | 38.04161074                            |
| 4774.015044                               | 0.524263337                      | 0.035770335                                      | 0.000940428                                         | 171.1968241                            |
| 877.0098086                               | 0.498867497                      | 0.052596046                                      | 0.002691606                                         | 46.33711691                            |
| 1555.001285                               | 0.583146067                      | 0.033010223                                      | 0.001820859                                         | 51.39691715                            |
| 2546.112062                               | 0.443945414                      | 0.043882269                                      | 0.002047998                                         | 112.7774319                            |
| 3535.679612                               | 0.472910927                      | 0.049244981                                      | 0.001156755                                         | 177.5281553                            |
| 385                                       | 0.487341772                      | 0.035466532                                      | 0.003570378                                         | 13.65454545                            |
| 1824.211663                               | 0.479544278                      | 0.038057042                                      | 0.001417651                                         | 70.48164147                            |
| 619                                       | 0.474693252                      | 0.049062927                                      | 0.003759662                                         | 30.36995153                            |
| 3233.103713                               | 0.52144                          | 0.045978277                                      | 0.001143451                                         | 149.8432034                            |
| 3189                                      | 0.544476695                      | 0.040392116                                      | 0.001320191                                         | 128.8105989                            |
| 1090                                      | 0.376121463                      | 0.059166737                                      | 0.005336317                                         | 64.49174312                            |
| 556                                       | 0.428021555                      | 0.048878164                                      | 0.005835674                                         | 27.17625899                            |
| 1898.016789                               | 0.444289044                      | 0.045166916                                      | 0.001495103                                         | 86.08814271                            |
| 1190                                      | 0.522158842                      | 0.034482028                                      | 0.002665233                                         | 41.03361345                            |
| 1155.001729                               | 0.512173528                      | 0.045043174                                      | 0.004505265                                         | 52.11495246                            |
| 1500.011952                               | 0.480996487                      | 0.046889026                                      | 0.003527928                                         | 70.61487384                            |
| 652                                       | 0.485842027                      | 0.050462946                                      | 0.007175578                                         | 32.90184049                            |
| 1100                                      | 0.459098497                      | 0.050128926                                      | 0.001453757                                         | 55.14181818                            |
| 391                                       | 0.408141962                      | 0.049025059                                      | 0.00584512                                          | 19.16879795                            |
| 818                                       | 0.479203281                      | 0.047022674                                      | 0.003094758                                         | 38.46454768                            |
| 1268                                      | 0.542112014                      | 0.044705142                                      | 0.002510479                                         | 56.68611987                            |
| 1221                                      | 0.61387632                       | 0.037186393                                      | 0.003652429                                         | 45.4045864                             |
| 896                                       | 0.498054475                      | 0.033890705                                      | 0.002485217                                         | 30.36607143                            |
| 1817.009874                               | 0.557662894                      | 0.028909867                                      | 0.001136946                                         | 52.70268788                            |
| 1439                                      | 0.468272047                      | 0.044800338                                      | 0.00584541                                          | 64.46768589                            |
| 1237.006446                               | 0.508815088                      | 0.045868367                                      | 0.004165542                                         | 56.92264303                            |
| 513                                       | 0.334856397                      | 0.053900725                                      | 0.004674264                                         | 27.65107212                            |
| 1150.001736                               | 0.483018868                      | 0.048521296                                      | 0.00372632                                          | 55.89756944                            |
| 1314                                      | 0.479212254                      | 0.036870235                                      | 0.00267483                                          | 48.44748858                            |
| 741                                       | 0.506147541                      | 0.046009605                                      | 0.002292426                                         | 34.09311741                            |
| 1033                                      | 0.510123457                      | 0.039126071                                      | 0.001672245                                         | 40.41723136                            |
| 471.0168421                               | 0.364263804                      | 0.058756787                                      | 0.003988021                                         | 27.90947368                            |
| 1299.001537                               | 0.546179681                      | 0.043433154                                      | 0.002947843                                         | 56.50653344                            |
| 2621.075729                               | 0.509550453                      | 0.046130249                                      | 0.00196592                                          | 121.8299886                            |
| 1628                                      | 0.493333333                      | 0.047572729                                      | 0.004048502                                         | 77.44840295                            |
| 2200.00363                                | 0.506433824                      | 0.044224574                                      | 0.001895768                                         | 97.47096189                            |
| 1763.028201                               | 0.51811806                       | 0.036101782                                      | 0.001392536                                         | 64.00846024                            |
| 1488                                      | 0.528221512                      | 0.037061727                                      | 0.00255326                                          | 55.14784946                            |
| 465                                       | 0.444126074                      | 0.04246965                                       | 0.003031052                                         | 19.7483871                             |
| 406                                       | 0.486810552                      | 0.041556456                                      | 0.004199574                                         | 16.87192118                            |
| 2307.013823                               | 0.400935227                      | 0.052104735                                      | 0.002511043                                         | 120.6224622                            |

| wavelet.HLL_gldzm_HighIntensityLargeDistanceEmphasis | wavelet.HLL_gldzm_SmallDistanceEmphasis | wavelet.HLL_glcm_SumVariance | wavelet.HLL_glcm_Homogeneity1 | wavelet.HLL_glcm_Homogeneity2 |
|------------------------------------------------------|-----------------------------------------|------------------------------|-------------------------------|-------------------------------|
| 742.5820433                                          | 0.999419505                             | 2394.723106                  | 0.227301208                   | 0.138363905                   |
| 309.7260638                                          | 1                                       | 849.8109207                  | 0.337249184                   | 0.247540025                   |
| 361.5145631                                          | 1                                       | 1089.290844                  | 0.34783029                    | 0.261678156                   |
| 1124.185455                                          | 1                                       | 3664.030766                  | 0.249745385                   | 0.163313464                   |
| 451.9137597                                          | 1                                       | 1220.744795                  | 0.313515096                   | 0.223882156                   |
| 736.771978                                           | 1                                       | 2291.578604                  | 0.257420172                   | 0.163690247                   |
| 561.3903405                                          | 0.996437055                             | 1769.151498                  | 0.315851186                   | 0.226909908                   |
| 1810.025227                                          | 0.99940875                              | 6071.097426                  | 0.27321321                    | 0.188095993                   |
| 3442.257108                                          | 1                                       | 12415.42816                  | 0.255455151                   | 0.170895129                   |
| 1256.0131                                            | 1                                       | 4158.924872                  | 0.227996006                   | 0.141302961                   |
| 367.911859                                           | 1                                       | 1133.141047                  | 0.327238719                   | 0.23538975                    |
| 1552.496536                                          | 0.997690531                             | 5228.251096                  | 0.251682955                   | 0.164870015                   |
| 1092.56891                                           | 1                                       | 3612.506719                  | 0.37195504                    | 0.294333026                   |
| 2844.514315                                          | 1                                       | 10131.49169                  | 0.242207835                   | 0.157121547                   |
| 2613.480033                                          | 1                                       | 9323.09547                   | 0.223715159                   | 0.140516662                   |
| 436.2887244                                          | 1                                       | 1301.302741                  | 0.321716937                   | 0.23356444                    |
| 360.6925566                                          | 1                                       | 1044.023069                  | 0.274639622                   | 0.179519669                   |
| 522.6328294                                          | 1                                       | 1636.691151                  | 0.343377208                   | 0.259621031                   |
| 1074.172819                                          | 1                                       | 3768.042076                  | 0.305114814                   | 0.217356917                   |
| 5715.488422                                          | 0.999465622                             | 20912.34346                  | 0.250188574                   | 0.161911942                   |
| 570.8568841                                          | 0.999320652                             | 1665.330988                  | 0.365032274                   | 0.286061603                   |
| 498.6232639                                          | 0.997395833                             | 1482.039131                  | 0.275606034                   | 0.184370104                   |
| 252.3253968                                          | 1                                       | 744.1272383                  | 0.296332843                   | 0.203528557                   |
| 839.7164782                                          | 1                                       | 2758.080165                  | 0.307640841                   | 0.2199041                     |
| 2302.460927                                          | 1                                       | 8243.898569                  | 0.227840346                   | 0.14312708                    |
| 1121.485086                                          | 1                                       | 3584.833773                  | 0.260821995                   | 0.172974167                   |
| 620.7995255                                          | 1                                       | 1935.881976                  | 0.26244198                    | 0.172541485                   |
| 1889.819142                                          | 1                                       | 6586.430421                  | 0.249325722                   | 0.163779623                   |
| 200.4147465                                          | 1                                       | 519.2507586                  | 0.29739632                    | 0.20390318                    |
| 1124.276371                                          | 1                                       | 3920.560581                  | 0.300167042                   | 0.210086683                   |
| 2285.573614                                          | 1                                       | 7867.235822                  | 0.307950262                   | 0.22501592                    |
| 609.6321839                                          | 0.999137931                             | 2011.199413                  | 0.313357272                   | 0.223566078                   |
| 795.9218935                                          | 0.999556213                             | 2541.822995                  | 0.267864643                   | 0.175983703                   |
| 483.960199                                           | 1                                       | 1496.545034                  | 0.271326804                   | 0.182380749                   |
| 3410.324097                                          | 0.998110831                             | 12305.45747                  | 0.262697949                   | 0.176270332                   |
| 1781.376201                                          | 0.998891353                             | 5938.397333                  | 0.302560023                   | 0.219992746                   |
| 4676.069159                                          | 1                                       | 17244.14697                  | 0.314321344                   | 0.23331789                    |
| 1030.860018                                          | 0.997316637                             | 3387.728462                  | 0.320059659                   | 0.237102441                   |
| 411.2303263                                          | 1                                       | 1257.457795                  | 0.305636646                   | 0.213437861                   |
| 756.2516405                                          | 0.99935806                              | 2423.623914                  | 0.284535172                   | 0.192563521                   |
| 1309.85086                                           | 1                                       | 4490.509626                  | 0.317485633                   | 0.234704784                   |
| 2022.689544                                          | 0.998486072                             | 6979.437868                  | 0.214844023                   | 0.128676975                   |
| 752.8439201                                          | 1                                       | 2335.086216                  | 0.302571589                   | 0.216015025                   |
| 508.5189591                                          | 1                                       | 1559.936054                  | 0.261671556                   | 0.170065539                   |
| 482.4559505                                          | 1                                       | 1461.231874                  | 0.28120772                    | 0.189291129                   |
| 757.2427046                                          | 1                                       | 2486.735022                  | 0.279661001                   | 0.188662097                   |
| 4254.389348                                          | 1                                       | 15466.54002                  | 0.286995221                   | 0.198081812                   |
| 981.9013761                                          | 1                                       | 3354.402985                  | 0.280896822                   | 0.193601484                   |
| 1533.073585                                          | 1                                       | 5120.522409                  | 0.228731703                   | 0.144756454                   |
| 715.2180937                                          | 0.997576737                             | 2224.192677                  | 0.301280981                   | 0.214328748                   |
| 890.1207729                                          | 1                                       | 2946.642559                  | 0.280950596                   | 0.189764058                   |
| 1225.15                                              | 1                                       | 4118.308291                  | 0.261723415                   | 0.168035387                   |
| 1600.79586                                           | 0.999391234                             | 5502.382617                  | 0.251317484                   | 0.163597666                   |
| 554.8577681                                          | 1                                       | 1552.510631                  | 0.331502481                   | 0.245448352                   |
| 1026.780521                                          | 1                                       | 3228.90177                   | 0.26576061                    | 0.181030055                   |
| 392.6704937                                          | 1                                       | 1141.889607                  | 0.305676465                   | 0.213227716                   |
| 948.7535246                                          | 0.999635391                             | 3163.136253                  | 0.282540295                   | 0.191488584                   |
| 438.5120836                                          | 1                                       | 1314.677689                  | 0.298289053                   | 0.207547258                   |
| 454.2684564                                          | 1                                       | 1403.833912                  | 0.299747347                   | 0.208430993                   |
| 1790.808817                                          | 0.999059758                             | 6126.06807                   | 0.267711528                   | 0.184730003                   |
| 805.9148695                                          | 0.998297389                             | 2714.828472                  | 0.288832742                   | 0.195663728                   |
| 1534.87219                                           | 0.999518304                             | 5136.407872                  | 0.235658385                   | 0.149899597                   |
| 961.5747082                                          | 0.996498054                             | 3133.098508                  | 0.310718174                   | 0.223807817                   |
| 1322.672954                                          | 0.992718447                             | 4466.550049                  | 0.284526913                   | 0.191848429                   |
| 4183.496104                                          | 1                                       | 15497.70414                  | 0.285999529                   | 0.200655235                   |
| 1689.2554                                            | 0.994330454                             | 5585.024976                  | 0.284948544                   | 0.19890067                    |
| 651.1017771                                          | 1                                       | 2107.22466                   | 0.292759569                   | 0.203474416                   |
| 1407.059527                                          | 0.997008285                             | 4813.191401                  | 0.270918883                   | 0.178950747                   |
| 1417.732518                                          | 1                                       | 4952.315311                  | 0.270878257                   | 0.182377138                   |
| 342.193578                                           | 1                                       | 1070.73575                   | 0.338285285                   | 0.247980232                   |
| 488.2230216                                          | 1                                       | 1479.960084                  | 0.308042093                   | 0.218297528                   |
| 1237.422875                                          | 0.998426023                             | 4233.67038                   | 0.303050697                   | 0.212767723                   |
| 1090.994118                                          | 1                                       | 3516.577735                  | 0.271653766                   | 0.188207259                   |
| 515.5306828                                          | 0.999351772                             | 1560.579307                  | 0.270935923                   | 0.180194494                   |
| 550.0969456                                          | 0.998505976                             | 1664.032783                  | 0.295081179                   | 0.205276                      |
| 375.0659509                                          | 1                                       | 1095.793238                  | 0.285872647                   | 0.193439119                   |
| 2062.626364                                          | 1                                       | 7390.667641                  | 0.299687517                   | 0.208446827                   |
| 740.8516624                                          | 1                                       | 2443.626951                  | 0.329045606                   | 0.246390592                   |
| 929.2848411                                          | 1                                       | 3138.239526                  | 0.286700603                   | 0.196814082                   |
| 790.5141956                                          | 1                                       | 2641.701441                  | 0.255122385                   | 0.163132587                   |
| 739.3210483                                          | 1                                       | 2387.841788                  | 0.22984688                    | 0.14109695                    |
| 1322.080357                                          | 1                                       | 4489.384828                  | 0.274359359                   | 0.192030825                   |
| 2321.903456                                          | 0.998765771                             | 8117.297413                  | 0.244203893                   | 0.163048948                   |
| 416.5253648                                          | 1                                       | 1233.905157                  | 0.29504009                    | 0.205930587                   |
| 499.0024174                                          | 0.998791297                             | 1488.564071                  | 0.278693591                   | 0.187918098                   |
| 705.9902534                                          | 1                                       | 2482.372447                  | 0.364200678                   | 0.282549316                   |
| 595.9661458                                          | 0.999348958                             | 1905.742078                  | 0.285161368                   | 0.195054818                   |
| 1089.098935                                          | 1                                       | 3530.05359                   | 0.294744874                   | 0.210951688                   |
| 1700.987854                                          | 1                                       | 5876.391562                  | 0.281400688                   | 0.192950041                   |
| 1964.745402                                          | 1                                       | 6924.393349                  | 0.273636421                   | 0.187929571                   |
| 662.7705263                                          | 0.996842105                             | 2152.730252                  | 0.363750685                   | 0.279312793                   |
| 728.8439662                                          | 0.99942352                              | 2351.828818                  | 0.263413192                   | 0.171602949                   |
| 819.7304051                                          | 0.997160167                             | 2655.812534                  | 0.270666231                   | 0.179000423                   |
| 480.027027                                           | 1                                       | 1444.848481                  | 0.290497106                   | 0.199611656                   |
| 931.4673321                                          | 0.999319419                             | 3088.676512                  | 0.276339299                   | 0.186158624                   |
| 1618.299492                                          | 0.997884941                             | 5578.633494                  | 0.269543399                   | 0.182306158                   |
| 1010.453629                                          | 1                                       | 3380.900945                  | 0.263603947                   | 0.17663295                    |
| 1666.533333                                          | 1                                       | 5856.792256                  | 0.30986787                    | 0.229472539                   |
| 1020.741379                                          | 1                                       | 3463.304918                  | 0.286435831                   | 0.201752222                   |
| 647.3079914                                          | 0.998704104                             | 2113.016828                  | 0.330744801                   | 0.242283473                   |























| wavelet.HLL_glrjm_RunLengthNonUniformityNormalized | wavelet.HLL_glszm_GrayLevelVariance | wavelet.HLL_glszm_SmallAreaHighGrayLevelEmphasis | wavelet.HLL_glszm_GrayLevelNonUniformityNormalized |
|----------------------------------------------------|-------------------------------------|--------------------------------------------------|----------------------------------------------------|
| 0.927571863                                        | 59.92979121                         | 555.7004544                                      | 0.037016314                                        |
| 0.871647042                                        | 27.82553616                         | 207.8016833                                      | 0.058298438                                        |
| 0.851953962                                        | 26.58902818                         | 253.029585                                       | 0.057325541                                        |
| 0.912438899                                        | 88.04788099                         | 838.5256894                                      | 0.0336                                             |
| 0.88347011                                         | 47.91155035                         | 324.5855812                                      | 0.046791434                                        |
| 0.915101859                                        | 51.16666918                         | 520.0341252                                      | 0.044197561                                        |
| 0.88247244                                         | 30.00599372                         | 385.4665117                                      | 0.051797647                                        |
| 0.89484855                                         | 85.28062546                         | 1312.551723                                      | 0.035551566                                        |
| 0.90331026                                         | 129.2774482                         | 2568.484461                                      | 0.030682788                                        |
| 0.931027565                                        | 77.63509468                         | 977.1540719                                      | 0.035152732                                        |
| 0.879924261                                        | 22.39287219                         | 235.6211842                                      | 0.060799844                                        |
| 0.914081282                                        | 81.99949982                         | 1131.325744                                      | 0.037793625                                        |
| 0.825246065                                        | 58.8021424                          | 779.4808957                                      | 0.049170981                                        |
| 0.916080863                                        | 122.5130844                         | 2159.807919                                      | 0.031452695                                        |
| 0.92295917                                         | 144.0846267                         | 1977.242844                                      | 0.02655862                                         |
| 0.87206107                                         | 35.62785938                         | 298.6809561                                      | 0.047556442                                        |
| 0.908960261                                        | 32.4848085                          | 256.4346781                                      | 0.049543888                                        |
| 0.856722976                                        | 39.6776213                          | 353.4920242                                      | 0.049806642                                        |
| 0.88360519                                         | 53.92775945                         | 733.467123                                       | 0.044620738                                        |
| 0.9092902                                          | 115.6562964                         | 4227.611321                                      | 0.033840662                                        |
| 0.835329562                                        | 45.4030592                          | 406.0270134                                      | 0.046571427                                        |
| 0.909414342                                        | 38.63599236                         | 350.9194676                                      | 0.046501254                                        |
| 0.903288772                                        | 29.46315193                         | 171.0651557                                      | 0.050988914                                        |
| 0.889126105                                        | 52.3202394                          | 598.0122913                                      | 0.043963243                                        |
| 0.92454568                                         | 139.9029692                         | 1746.993155                                      | 0.027218104                                        |
| 0.910726487                                        | 66.51021148                         | 825.825851                                       | 0.037818315                                        |
| 0.908418266                                        | 49.91268263                         | 447.5814426                                      | 0.040714896                                        |
| 0.9089984                                          | 95.75150149                         | 1397.862593                                      | 0.033029877                                        |
| 0.901592649                                        | 26.70963495                         | 134.4485211                                      | 0.057486887                                        |
| 0.887007427                                        | 43.19861935                         | 793.7778819                                      | 0.046718386                                        |
| 0.869880814                                        | 90.03297274                         | 1669.596729                                      | 0.037951186                                        |
| 0.874101275                                        | 32.52839741                         | 403.1187605                                      | 0.051586735                                        |
| 0.911371126                                        | 43.24739645                         | 567.6248803                                      | 0.044333182                                        |
| 0.901423907                                        | 46.92141284                         | 347.5504245                                      | 0.04119535                                         |
| 0.906327199                                        | 100.6391882                         | 2506.24517                                       | 0.03365854                                         |
| 0.878031029                                        | 87.79510753                         | 1324.442832                                      | 0.03581595                                         |
| 0.864902877                                        | 118.0105682                         | 3499.315826                                      | 0.03744723                                         |
| 0.864395878                                        | 46.47447105                         | 704.3446311                                      | 0.043454642                                        |
| 0.881805857                                        | 28.46851434                         | 273.7281281                                      | 0.055337992                                        |
| 0.897616679                                        | 34.85858547                         | 525.4457516                                      | 0.048280813                                        |
| 0.866591312                                        | 68.60230542                         | 924.076494                                       | 0.039602748                                        |
| 0.934450335                                        | 85.03019251                         | 1555.602918                                      | 0.032859595                                        |
| 0.883592428                                        | 61.50072482                         | 544.1134495                                      | 0.043276464                                        |
| 0.913615904                                        | 43.43526154                         | 367.403758                                       | 0.042860104                                        |
| 0.903343194                                        | 35.46355191                         | 346.898247                                       | 0.048257443                                        |
| 0.902846734                                        | 49.56910576                         | 528.5596645                                      | 0.041404238                                        |
| 0.891508246                                        | 83.64927259                         | 3066.69973                                       | 0.039956287                                        |
| 0.897214442                                        | 48.71098287                         | 681.2147804                                      | 0.046660635                                        |
| 0.922204258                                        | 88.93018512                         | 1172.627453                                      | 0.035535778                                        |
| 0.881409099                                        | 63.12290134                         | 499.7870937                                      | 0.043498686                                        |
| 0.898431283                                        | 40.31847236                         | 623.6087667                                      | 0.046477164                                        |
| 0.914154476                                        | 43.26382653                         | 878.4598931                                      | 0.043945176                                        |
| 0.910900024                                        | 75.3578432                          | 1170.85173                                       | 0.036225544                                        |
| 0.865043023                                        | 43.72185646                         | 397.3456936                                      | 0.048106527                                        |
| 0.900880269                                        | 86.75669736                         | 779.7612318                                      | 0.03307799                                         |
| 0.888293531                                        | 30.75372409                         | 272.7618556                                      | 0.052793087                                        |
| 0.902746182                                        | 37.63879223                         | 678.0015441                                      | 0.046753335                                        |
| 0.887207518                                        | 32.32241748                         | 299.8621377                                      | 0.050286246                                        |
| 0.891006868                                        | 32.17281023                         | 314.7720597                                      | 0.051062565                                        |
| 0.893626125                                        | 69.57686221                         | 1308.24198                                       | 0.035770335                                        |
| 0.903983347                                        | 30.30461206                         | 567.4290077                                      | 0.052596046                                        |
| 0.922130689                                        | 93.91169471                         | 1147.857192                                      | 0.033010223                                        |
| 0.882694915                                        | 47.61327196                         | 678.6065988                                      | 0.043882269                                        |
| 0.897030766                                        | 34.85829967                         | 889.2008035                                      | 0.049244981                                        |
| 0.889195421                                        | 146.4615686                         | 3059.825331                                      | 0.035466352                                        |
| 0.888376868                                        | 76.40475885                         | 1199.59923                                       | 0.038057042                                        |
| 0.89072998                                         | 38.07937655                         | 479.2384073                                      | 0.049062927                                        |
| 0.906644896                                        | 38.92880621                         | 995.63907                                        | 0.045978277                                        |
| 0.909519607                                        | 61.41920078                         | 1051.164696                                      | 0.04039216                                         |
| 0.865672963                                        | 23.48919199                         | 223.5281413                                      | 0.059166737                                        |
| 0.884127069                                        | 37.50095751                         | 325.8576731                                      | 0.048878164                                        |
| 0.883062649                                        | 42.19425292                         | 856.6485372                                      | 0.045166916                                        |
| 0.896576321                                        | 78.41754184                         | 813.8964378                                      | 0.034482028                                        |
| 0.903390246                                        | 42.22890392                         | 380.2247557                                      | 0.045043174                                        |
| 0.892029953                                        | 38.18510288                         | 386.6821803                                      | 0.046889026                                        |
| 0.897954412                                        | 32.64568435                         | 257.1645666                                      | 0.050462946                                        |
| 0.888231674                                        | 43.92146364                         | 1466.985153                                      | 0.050128926                                        |
| 0.859397154                                        | 48.12541781                         | 510.057829                                       | 0.049025059                                        |
| 0.896819801                                        | 46.43947161                         | 628.5606032                                      | 0.047022674                                        |
| 0.912630931                                        | 41.53370767                         | 546.9232162                                      | 0.044705142                                        |
| 0.928541841                                        | 59.52539942                         | 552.8511418                                      | 0.037186393                                        |
| 0.891403426                                        | 86.11844308                         | 954.2034948                                      | 0.033890705                                        |
| 0.907565001                                        | 117.085142                          | 1714.215765                                      | 0.028909867                                        |
| 0.889227936                                        | 42.92670234                         | 290.2217173                                      | 0.044800338                                        |
| 0.903990481                                        | 38.3855044                          | 353.8799253                                      | 0.045868367                                        |
| 0.843230459                                        | 37.57121849                         | 460.2785565                                      | 0.053900725                                        |
| 0.896350566                                        | 37.96883967                         | 410.664096                                       | 0.048522196                                        |
| 0.885160851                                        | 75.78627542                         | 804.6697489                                      | 0.036870235                                        |
| 0.896798164                                        | 64.5069416                          | 1196.446993                                      | 0.046009605                                        |
| 0.898592353                                        | 75.82065788                         | 1440.901162                                      | 0.039126071                                        |
| 0.850366096                                        | 26.60860277                         | 434.8118889                                      | 0.058756787                                        |
| 0.913811277                                        | 44.44148266                         | 526.6797276                                      | 0.043433154                                        |
| 0.903896841                                        | 39.07646654                         | 579.6370319                                      | 0.046130249                                        |
| 0.900225275                                        | 35.71863398                         | 333.7521154                                      | 0.047572729                                        |
| 0.902059496                                        | 43.72745643                         | 675.0779947                                      | 0.044224574                                        |
| 0.899118372                                        | 71.3325056                          | 1187.056056                                      | 0.036101782                                        |
| 0.902928558                                        | 71.86310872                         | 731.9644255                                      | 0.037061727                                        |
| 0.869500309                                        | 80.60976298                         | 1191.685275                                      | 0.04246965                                         |
| 0.893494638                                        | 60.50477444                         | 713.8603734                                      | 0.041556456                                        |
| 0.87160809                                         | 31.6439112                          | 442.4927326                                      | 0.052104735                                        |

| wavelet.HLL_glszm_SizeZoneNonUniformityNormalized | wavelet.HLL_glszm_SizeZoneNonUniformity | wavelet.HLL_glszm_GrayLevelNonUniformity | wavelet.HLL_glszm_LargeAreaEmphasis | wavelet.HLL_glszm_ZoneVariance |
|---------------------------------------------------|-----------------------------------------|------------------------------------------|-------------------------------------|--------------------------------|
| 0.532891142                                       | 688.495356                              | 47.8250774                               | 5.770897833                         | 3.073371258                    |
| 0.403717746                                       | 151.7978723                             | 21.92021277                              | 24.40159574                         | 18.21790827                    |
| 0.465171081                                       | 287.4757282                             | 35.42718447                              | 78.22330097                         | 72.06198092                    |
| 0.509983471                                       | 280.4909091                             | 18.48                                    | 7.434545455                         | 4.279077686                    |
| 0.451214245                                       | 465.6531008                             | 48.28875969                              | 17.14147287                         | 11.87640466                    |
| 0.470565149                                       | 171.2857143                             | 16.08791209                              | 7.225274725                         | 3.937628306                    |
| 0.44920883                                        | 1134.701504                             | 130.8408551                              | 49.27355503                         | 44.26878735                    |
| 0.487918732                                       | 1237.849823                             | 90.194324                                | 17.7154119                          | 13.66162568                    |
| 0.521522264                                       | 1283.987815                             | 75.54102356                              | 13.10235581                         | 9.682918057                    |
| 0.569090343                                       | 390.9650655                             | 24.14992722                              | 4.465793304                         | 2.030921522                    |
| 0.375981057                                       | 234.6121795                             | 37.93910256                              | 14.17628205                         | 8.336004274                    |
| 0.512203679                                       | 665.3525789                             | 49.0939184                               | 7.949961509                         | 4.801317529                    |
| 0.460439267                                       | 287.3141026                             | 30.68269231                              | 164.2548077                         | 155.3028204                    |
| 0.535762229                                       | 523.9754601                             | 30.7607362                               | 9.172801636                         | 6.090586983                    |
| 0.539727188                                       | 648.7520799                             | 31.9234609                               | 7.099833611                         | 4.375411474                    |
| 0.440377541                                       | 773.3029613                             | 83.50911162                              | 34.62300683                         | 28.4128066                     |
| 0.460609964                                       | 284.6569579                             | 30.61812298                              | 8.275089096                         | 4.542306846                    |
| 0.423060237                                       | 195.8768898                             | 23.06047516                              | 39.51835853                         | 32.42643293                    |
| 0.450852439                                       | 268.7080537                             | 26.59395973                              | 23.95637584                         | 19.21333498                    |
| 0.506631152                                       | 1422.113644                             | 94.99073744                              | 10.18845743                         | 6.757978076                    |
| 0.45564712                                        | 503.0344203                             | 51.41485507                              | 151.2518116                         | 143.7489761                    |
| 0.463198061                                       | 266.8020833                             | 26.78472222                              | 8.571180556                         | 5.062062958                    |
| 0.424209499                                       | 213.8015873                             | 25.6984127                               | 11.07539683                         | 6.947404888                    |
| 0.471171387                                       | 583.3101777                             | 54.42649435                              | 27.3546042                          | 22.78302137                    |
| 0.54450068                                        | 411.0980132                             | 20.54966887                              | 6.287417219                         | 3.444508574                    |
| 0.491755161                                       | 626.4960754                             | 48.18053375                              | 9.443485086                         | 5.985753594                    |
| 0.471327617                                       | 794.658363                              | 68.64531435                              | 10.74199288                         | 7.064970541                    |
| 0.508693048                                       | 770.669967                              | 50.04026403                              | 12.24554455                         | 8.921842521                    |
| 0.400242095                                       | 86.85253456                             | 12.47465438                              | 8.843317972                         | 4.600097687                    |
| 0.471728177                                       | 447.1983122                             | 44.28902954                              | 16.79746835                         | 12.10302391                    |
| 0.489664259                                       | 1024.377629                             | 79.39388145                              | 118.7619503                         | 113.5891523                    |
| 0.415122209                                       | 361.1563218                             | 44.88045977                              | 31.07101494                         | 25.41466558                    |
| 0.465760303                                       | 787.1349112                             | 74.92307692                              | 8.878698225                         | 5.228111411                    |
| 0.474534459                                       | 572.2885572                             | 49.68159204                              | 11.87893864                         | 8.081934166                    |
| 0.514120739                                       | 1224.6356                               | 80.17464316                              | 12.50629723                         | 9.087989899                    |
| 0.513927879                                       | 695.3444198                             | 48.45898004                              | 49.70953437                         | 44.79641475                    |
| 0.520322202                                       | 835.117134                              | 60.10280374                              | 118.9514019                         | 113.5765158                    |
| 0.446793565                                       | 999.0304114                             | 97.16457961                              | 72.70617174                         | 67.37866362                    |
| 0.411260642                                       | 214.2667946                             | 28.83109405                              | 15.23608445                         | 9.662497559                    |
| 0.44185022                                        | 1548.685021                             | 169.2242511                              | 12.6510699                          | 8.348848293                    |
| 0.463117772                                       | 484.414914                              | 41.42447419                              | 60.6290631                          | 54.47904244                    |
| 0.558063861                                       | 1382.324182                             | 81.3932176                               | 4.36967181                          | 1.929747215                    |
| 0.469564769                                       | 776.1905626                             | 71.53599516                              | 27.1645493                          | 22.28079691                    |
| 0.478944735                                       | 644.1806691                             | 57.64684015                              | 8.826576799                         | 5.404953497                    |
| 0.477598427                                       | 309.0061824                             | 31.22256569                              | 10.46676971                         | 6.565076241                    |
| 0.462225656                                       | 649.4270463                             | 57.17295374                              | 10.40213523                         | 6.585048315                    |
| 0.478787373                                       | 1042.798898                             | 87.02479339                              | 21.03948577                         | 16.65221123                    |
| 0.463302752                                       | 202                                     | 20.34403627                              | 9.722477064                         | 5.731646116                    |
| 0.545653257                                       | 289.1962264                             | 18.83396226                              | 5.986792453                         | 3.408647205                    |
| 0.468317496                                       | 289.8885299                             | 26.92568659                              | 24.82714055                         | 20.05655064                    |
| 0.461363029                                       | 573.0128824                             | 57.72463768                              | 12.3115942                          | 8.03315843                     |
| 0.475408163                                       | 865.2428571                             | 79.98021978                              | 7.757692308                         | 4.327055609                    |
| 0.501714296                                       | 1236.224026                             | 89.25974026                              | 8.796266234                         | 5.443086946                    |
| 0.446317674                                       | 203.9671772                             | 21.98468271                              | 26.67396061                         | 20.83808876                    |
| 0.522389127                                       | 380.8216735                             | 24.1138546                               | 11.14951989                         | 7.821022465                    |
| 0.436900985                                       | 380.5407577                             | 45.98277842                              | 18.7347876                          | 13.72253543                    |
| 0.476328621                                       | 979.8079728                             | 96.17160914                              | 11.8005591                          | 7.938106691                    |
| 0.424448615                                       | 649.8308295                             | 76.98824298                              | 16.70019595                         | 11.59867592                    |
| 0.452359804                                       | 337.0080537                             | 38.04161074                              | 19.6966443                          | 14.80334399                    |
| 0.497165434                                       | 2379.433765                             | 171.1968241                              | 40.97889678                         | 37.34057568                    |
| 0.472941825                                       | 416.661748                              | 46.33711691                              | 15.73666288                         | 11.71848109                    |
| 0.514056518                                       | 800.3859987                             | 51.39691715                              | 6.281310212                         | 3.340646938                    |
| 0.475777377                                       | 1222.74786                              | 117.774319                               | 35.1155642                          | 30.04167648                    |
| 0.446472748                                       | 1609.534258                             | 172.5281553                              | 12.22718447                         | 7.755807333                    |
| 0.50444257                                        | 194.2103896                             | 13.65454545                              | 15.73506494                         | 11.52457413                    |
| 0.485251482                                       | 898.6857451                             | 70.48164147                              | 28.7224622                          | 24.37393117                    |
| 0.49910351                                        | 308.9450727                             | 30.36995153                              | 22.1039257                          | 17.66552963                    |
| 0.477546777                                       | 1556.324946                             | 149.8432034                              | 9.484504449                         | 5.806677305                    |
| 0.513745559                                       | 1638.334588                             | 128.8105989                              | 9.057698338                         | 5.684503636                    |
| 0.406228432                                       | 442.7889908                             | 64.49174312                              | 37.91559633                         | 30.84682771                    |
| 0.422713628                                       | 235.028777                              | 27.17625899                              | 23.55935252                         | 18.10091028                    |
| 0.450907225                                       | 859.429171                              | 86.08814271                              | 23.07555089                         | 18.00950882                    |
| 0.499666669                                       | 594.6033613                             | 41.03361345                              | 18.15714286                         | 14.48943507                    |
| 0.488754707                                       | 565.4891962                             | 52.11495246                              | 12.63526361                         | 8.823150804                    |
| 0.452864064                                       | 682.0132802                             | 70.61487384                              | 20.76826029                         | 16.44594751                    |
| 0.427246039                                       | 278.5644172                             | 32.91804409                              | 10.04907975                         | 5.812554104                    |
| 0.465578512                                       | 512.1363636                             | 55.14181818                              | 18.59454545                         | 13.85006942                    |
| 0.449480315                                       | 175.7468031                             | 19.16879795                              | 39.6112532                          | 33.60812658                    |
| 0.433175316                                       | 354.3374083                             | 38.46454768                              | 10.82762836                         | 6.472906367                    |
| 0.452035795                                       | 573.181388                              | 56.68611987                              | 6.666403785                         | 3.263717297                    |
| 0.529677544                                       | 646.7362817                             | 45.4045864                               | 5.463554464                         | 2.809937478                    |
| 0.49483817                                        | 443.375                                 | 30.36607143                              | 21.76674107                         | 17.73543004                    |
| 0.515362457                                       | 939.5057597                             | 52.70268788                              | 9.931431706                         | 6.715872548                    |
| 0.446328115                                       | 642.2661571                             | 64.46768589                              | 14.5038221                          | 9.943415844                    |
| 0.462772413                                       | 574.3005641                             | 56.92264303                              | 9.07545367                          | 5.213142685                    |
| 0.415128682                                       | 212.9610136                             | 27.65107212                              | 56.34697856                         | 47.42866371                    |
| 0.445396894                                       | 513.0972222                             | 55.89756944                              | 14.55989583                         | 10.27370199                    |
| 0.507465557                                       | 666.8097412                             | 48.44748858                              | 25.65296804                         | 21.29840912                    |
| 0.457682928                                       | 339.1430499                             | 34.09311741                              | 9.802069906                         | 5.896845821                    |
| 0.502481986                                       | 519.0638916                             | 40.41723136                              | 19.30396902                         | 15.4611546                     |
| 0.410286981                                       | 194.8663158                             | 27.90947368                              | 36.78736842                         | 29.25089861                    |
| 0.488803327                                       | 635.9331284                             | 56.50653344                              | 8.896233666                         | 5.54404139                     |
| 0.472488778                                       | 1247.842863                             | 121.8299886                              | 12.58121924                         | 8.729757253                    |
| 0.446409275                                       | 726.7542998                             | 77.44840295                              | 11.64496314                         | 7.536124577                    |
| 0.490472281                                       | 1081.000907                             | 97.47096189                              | 10.83484574                         | 6.935833545                    |
| 0.507680699                                       | 900.1178793                             | 64.00846024                              | 14.69937958                         | 10.9742401                     |
| 0.490579655                                       | 729.9825269                             | 55.14784946                              | 9.82594086                          | 6.241942258                    |
| 0.477544225                                       | 222.0580645                             | 19.7483871                               | 35.18064516                         | 30.1108845                     |
| 0.470467616                                       | 191.0098522                             | 16.87192118                              | 16.68965517                         | 12.46997015                    |
| 0.437548899                                       | 1012.925702                             | 120.6224622                              | 38.84924406                         | 32.62836772                    |

| wavelet.HLL_glszm_ZonePercentage | wavelet.HLL_glszm_LargeAreaLowGrayLevelEmphasis | wavelet.HLL_glszm_LargeAreaHighGrayLevelEmphasis | wavelet.HLL_glszm_HighGrayLevelZoneEmphasis |
|----------------------------------|-------------------------------------------------|--------------------------------------------------|---------------------------------------------|
| 0.608859566                      | 0.010678486                                     | 4309.695046                                      | 740.8893189                                 |
| 0.402139037                      | 0.108229478                                     | 6251.37234                                       | 309.7260638                                 |
| 0.402868318                      | 0.255615194                                     | 24556.46117                                      | 361.5145631                                 |
| 0.562947799                      | 0.010624074                                     | 7950.083636                                      | 1124.185455                                 |
| 0.435810811                      | 0.049968049                                     | 6585.080426                                      | 451.9137597                                 |
| 0.551515152                      | 0.014796967                                     | 5220.137363                                      | 736.771978                                  |
| 0.447000531                      | 0.095364489                                     | 26144.08987                                      | 554.1005542                                 |
| 0.496671887                      | 0.0116345                                       | 29677.20497                                      | 1805.64998                                  |
| 0.541575011                      | 0.005351252                                     | 43739.30869                                      | 3442.257108                                 |
| 0.640858209                      | 0.005833022                                     | 5631.225619                                      | 1256.0131                                   |
| 0.413793103                      | 0.044925746                                     | 5060.517628                                      | 367.911859                                  |
| 0.563557484                      | 0.008769109                                     | 12071.66282                                      | 1532.207852                                 |
| 0.334226031                      | 0.165512406                                     | 165581.3974                                      | 1092.56891                                  |
| 0.569598136                      | 0.004586611                                     | 25693.56646                                      | 2844.514315                                 |
| 0.605846774                      | 0.003994569                                     | 18246.28702                                      | 2613.480033                                 |
| 0.401279707                      | 0.092312918                                     | 13992.4197                                       | 436.2887244                                 |
| 0.51758794                       | 0.030317094                                     | 2850.148867                                      | 360.6925566                                 |
| 0.375506894                      | 0.085055923                                     | 19677.27214                                      | 522.6328294                                 |
| 0.459167951                      | 0.02518315                                      | 25608.51342                                      | 1074.172819                                 |
| 0.539911521                      | 0.002314616                                     | 56576.2248                                       | 5705.602423                                 |
| 0.365079365                      | 0.317735054                                     | 73494.93388                                      | 568.8759058                                 |
| 0.533827618                      | 0.021651199                                     | 4194.317708                                      | 493.8211806                                 |
| 0.4921875                        | 0.076554606                                     | 2829.075397                                      | 252.3253968                                 |
| 0.467699282                      | 0.037895738                                     | 21074.62278                                      | 839.7164782                                 |
| 0.593087196                      | 0.004554476                                     | 14059.63841                                      | 2302.460927                                 |
| 0.537779654                      | 0.010286827                                     | 10186.91052                                      | 1121.485086                                 |
| 0.521497062                      | 0.022300634                                     | 6297.196323                                      | 620.7995255                                 |
| 0.548515568                      | 0.007787919                                     | 22770.45677                                      | 1889.819142                                 |
| 0.485458613                      | 0.08734201                                      | 1541.064516                                      | 200.4147465                                 |
| 0.461538462                      | 0.016558737                                     | 18885.47046                                      | 1124.276371                                 |
| 0.439680538                      | 0.056275944                                     | 254248.5225                                      | 2285.573614                                 |
| 0.420492992                      | 0.052367118                                     | 19490.37241                                      | 607.645977                                  |
| 0.523381852                      | 0.01282343                                      | 7052.495266                                      | 794.4289941                                 |
| 0.513191489                      | 0.031938125                                     | 5629.26534                                       | 483.960199                                  |
| 0.540871935                      | 0.00431069                                      | 41203.79471                                      | 3382.793871                                 |
| 0.451150383                      | 0.032261871                                     | 79532.12417                                      | 1772.797487                                 |
| 0.431335662                      | 0.026386475                                     | 550427.4006                                      | 4676.069159                                 |
| 0.43324937                       | 0.079662499                                     | 68645.36091                                      | 1018.792934                                 |
| 0.423577236                      | 0.043778949                                     | 6271.8119                                        | 411.2303263                                 |
| 0.482118294                      | 0.018603548                                     | 9243.360913                                      | 755.0114123                                 |
| 0.403238242                      | 0.048205532                                     | 78955.14723                                      | 1309.85086                                  |
| 0.640548229                      | 0.002891889                                     | 8731.79895                                       | 2011.485264                                 |
| 0.452504791                      | 0.042502045                                     | 19203.50756                                      | 752.8439201                                 |
| 0.540594855                      | 0.021297457                                     | 4490.128625                                      | 508.5189591                                 |
| 0.506259781                      | 0.027188003                                     | 4949.621329                                      | 482.4559505                                 |
| 0.511839709                      | 0.016101688                                     | 7843.72242                                       | 757.2427046                                 |
| 0.477422183                      | 0.005595148                                     | 87061.28099                                      | 4254.389348                                 |
| 0.500574053                      | 0.012603331                                     | 9906.550459                                      | 981.9013761                                 |
| 0.62279671                       | 0.006390361                                     | 9099.286792                                      | 1533.073585                                 |
| 0.457840237                      | 0.046645264                                     | 15942.58966                                      | 705.2827141                                 |
| 0.483456598                      | 0.015433932                                     | 11172.938                                        | 890.1207729                                 |
| 0.53989914                       | 0.007435081                                     | 9283.602198                                      | 1225.15                                     |
| 0.546099291                      | 0.006862938                                     | 13891.96144                                      | 1597.181006                                 |
| 0.413949275                      | 0.061536746                                     | 12729.91685                                      | 554.8577681                                 |
| 0.548120301                      | 0.015906907                                     | 9961.102881                                      | 1026.780521                                 |
| 0.446666667                      | 0.056989561                                     | 7031.567164                                      | 392.6704937                                 |
| 0.508529048                      | 0.01366233                                      | 11041.1896                                       | 948.1701507                                 |
| 0.442741469                      | 0.043708534                                     | 7056.328543                                      | 438.5120836                                 |
| 0.452063107                      | 0.046355512                                     | 9160.236242                                      | 454.2684564                                 |
| 0.524263337                      | 0.025392382                                     | 67563.10593                                      | 1783.910573                                 |
| 0.498867497                      | 0.021541138                                     | 12548.64699                                      | 801.2020431                                 |
| 0.583146067                      | 0.005580924                                     | 9282.612717                                      | 1532.64483                                  |
| 0.443945414                      | 0.039682322                                     | 32284.793                                        | 945.2801556                                 |
| 0.472910927                      | 0.009985037                                     | 15876.4663                                       | 1286.035506                                 |
| 0.487341772                      | 0.007223095                                     | 64018.42857                                      | 4183.496104                                 |
| 0.479544278                      | 0.019468552                                     | 44594.94816                                      | 1647.593952                                 |
| 0.474693252                      | 0.038156269                                     | 13843.1454                                       | 651.1017771                                 |
| 0.52144                          | 0.007393739                                     | 13191.29733                                      | 1387.186253                                 |
| 0.544476695                      | 0.007129858                                     | 13001.37473                                      | 1417.732518                                 |
| 0.376121463                      | 0.118981854                                     | 12775.63211                                      | 342.193578                                  |
| 0.428021555                      | 0.058044986                                     | 10686.66547                                      | 488.2230216                                 |
| 0.444289044                      | 0.02036979                                      | 27462.69517                                      | 1231.647954                                 |
| 0.522158842                      | 0.021043308                                     | 17730.07311                                      | 1090.994118                                 |
| 0.512173528                      | 0.028922976                                     | 6357.506482                                      | 513.4978392                                 |
| 0.480996487                      | 0.042029706                                     | 11028.18194                                      | 546.6786189                                 |
| 0.485842027                      | 0.03665024                                      | 3683.650307                                      | 375.0659509                                 |
| 0.459098497                      | 0.010058671                                     | 38312.73                                         | 2062.626364                                 |
| 0.408141962                      | 0.058897254                                     | 29135.31714                                      | 740.8516624                                 |
| 0.479203281                      | 0.013802                                        | 10293.56357                                      | 929.2848411                                 |
| 0.542112014                      | 0.009774575                                     | 5498.851735                                      | 790.5141956                                 |
| 0.61387632                       | 0.01030198                                      | 4099.66421                                       | 739.3210483                                 |
| 0.498054475                      | 0.018865784                                     | 28085.71317                                      | 1322.080357                                 |
| 0.557662894                      | 0.005489773                                     | 21202.58749                                      | 2311.876577                                 |
| 0.468272047                      | 0.043676317                                     | 5802.910354                                      | 416.5253648                                 |
| 0.508815088                      | 0.022793339                                     | 4403.04996                                       | 496.8146656                                 |
| 0.334856397                      | 0.076805012                                     | 43605.63548                                      | 705.9902534                                 |
| 0.483018868                      | 0.02868428                                      | 8339.078125                                      | 592.9557292                                 |
| 0.479212254                      | 0.02830691                                      | 25341.54642                                      | 1089.098935                                 |
| 0.506147541                      | 0.007635983                                     | 16666.99055                                      | 1700.987854                                 |
| 0.510123457                      | 0.011023102                                     | 38085.03195                                      | 1964.745402                                 |
| 0.364263804                      | 0.060645725                                     | 23572.21895                                      | 657.2                                       |
| 0.546179681                      | 0.014709953                                     | 6333.036126                                      | 728.1775557                                 |
| 0.509550453                      | 0.017012246                                     | 10014.40477                                      | 810.2794396                                 |
| 0.493333333                      | 0.029105435                                     | 5402.04914                                       | 480.027027                                  |
| 0.506433824                      | 0.012939083                                     | 10061.5245                                       | 929.6270471                                 |
| 0.51811806                       | 0.010319305                                     | 23037.07332                                      | 1605.780034                                 |
| 0.528221512                      | 0.011866015                                     | 9794.070565                                      | 1010.453629                                 |
| 0.444126074                      | 0.023126004                                     | 60616.76989                                      | 1666.533333                                 |
| 0.486810552                      | 0.020105956                                     | 17072.42857                                      | 1020.741379                                 |
| 0.400935227                      | 0.06314244                                      | 24698.6851                                       | 644.3935205                                 |







| wavelet.LLH_gldm_GrayLevelNonUniformityNormalized | wavelet.LLH_gldm_DependenceEntropy | wavelet.LLH_gldm_DependenceNonUniformity | wavelet.LLH_gldm_GrayLevelNonUniformity |
|---------------------------------------------------|------------------------------------|------------------------------------------|-----------------------------------------|
| 0.026268942                                       | 7.235242388                        | 756.9321395                              | 55.74269557                             |
| 0.029508422                                       | 7.074647544                        | 290.9508021                              | 27.59037433                             |
| 0.026147863                                       | 7.310785536                        | 472.684485                               | 40.11082138                             |
| 0.058463389                                       | 6.453499603                        | 248.9283521                              | 57.11873081                             |
| 0.049402364                                       | 6.73050215                         | 598.6300676                              | 116.9847973                             |
| 0.031033058                                       | 6.673684755                        | 245.9666667                              | 20.48181818                             |
| 0.016773042                                       | 7.975391289                        | 1828.925677                              | 94.78446293                             |
| 0.063918959                                       | 6.763496078                        | 1054.239233                              | 326.4980423                             |
| 0.051565471                                       | 6.767244904                        | 1111.16806                               | 234.41663                               |
| 0.060174872                                       | 6.438318102                        | 245.5205224                              | 64.50746269                             |
| 0.029064266                                       | 7.234121594                        | 411.096817                               | 43.82891247                             |
| 0.051797046                                       | 6.672513126                        | 579.9752711                              | 119.3921909                             |
| 0.105697611                                       | 6.319771955                        | 271.2688806                              | 197.3374397                             |
| 0.047421567                                       | 6.802158844                        | 434.1042516                              | 81.42283052                             |
| 0.074559683                                       | 6.390955531                        | 412.0665323                              | 147.9264113                             |
| 0.015683018                                       | 8.244445686                        | 1253.099177                              | 68.62888483                             |
| 0.027775673                                       | 6.816208887                        | 451.6097152                              | 33.1641541                              |
| 0.070591184                                       | 6.632250702                        | 232.8832117                              | 87.03892944                             |
| 0.046937211                                       | 6.583260583                        | 353.6702619                              | 60.92449923                             |
| 0.061154251                                       | 6.574614655                        | 1173.259665                              | 317.9409502                             |
| 0.070756698                                       | 6.688223621                        | 564.9146825                              | 213.968254                              |
| 0.051605295                                       | 6.428854571                        | 297.1538462                              | 55.68211307                             |
| 0.052097321                                       | 6.55160017                         | 255.5292969                              | 53.34765625                             |
| 0.036936412                                       | 6.959214246                        | 779.9709105                              | 97.77068379                             |
| 0.085683749                                       | 6.173199883                        | 238.794187                               | 109.0754124                             |
| 0.038545045                                       | 6.924638615                        | 701.6990291                              | 91.31321233                             |
| 0.011958433                                       | 8.014236709                        | 1312.508815                              | 38.6616146                              |
| 0.065770798                                       | 6.589114254                        | 560.6719768                              | 181.6589428                             |
| 0.035789179                                       | 6.540978458                        | 139.9485459                              | 15.99776286                             |
| 0.041285487                                       | 6.889609871                        | 537.5443038                              | 84.80038948                             |
| 0.065011632                                       | 6.858105691                        | 909.1996637                              | 309.3253468                             |
| 0.019130944                                       | 7.752651488                        | 656.1918801                              | 39.58192363                             |
| 0.009009498                                       | 8.357235408                        | 1277.179003                              | 29.09166925                             |
| 0.012351652                                       | 8.113521376                        | 823.2468085                              | 19.02638298                             |
| 0.040521951                                       | 6.889005314                        | 1246.758856                              | 178.4586739                             |
| 0.077593832                                       | 6.572119327                        | 529.912971                               | 232.7039013                             |
| 0.071838106                                       | 6.600106951                        | 705.9809191                              | 267.3095942                             |
| 0.01053994                                        | 8.704118177                        | 1466.51211                               | 54.39662856                             |
| 0.026485558                                       | 6.975543963                        | 425.2455285                              | 32.57723577                             |
| 0.01280592                                        | 8.434038994                        | 2278.276754                              | 93.09903714                             |
| 0.053314719                                       | 6.771805717                        | 615.1279877                              | 138.2983809                             |
| 0.042547428                                       | 6.635926945                        | 1196.831394                              | 164.5309025                             |
| 0.051996982                                       | 6.797087861                        | 896.4448399                              | 189.9449767                             |
| 0.011132536                                       | 7.914621111                        | 1073.971061                              | 27.6977492                              |
| 0.015730271                                       | 7.844787369                        | 419.0375587                              | 20.10328638                             |
| 0.017719251                                       | 7.887677952                        | 848.2291439                              | 48.63934426                             |
| 0.039725072                                       | 6.979863294                        | 1286.515563                              | 181.2257782                             |
| 0.074149697                                       | 6.059023285                        | 201.7210103                              | 64.58438576                             |
| 0.053746128                                       | 6.418045349                        | 233.8343126                              | 45.73795535                             |
| 0.087120549                                       | 6.171551532                        | 255.7795858                              | 117.7869822                             |
| 0.015370102                                       | 7.844290399                        | 888.2051382                              | 39.48579214                             |
| 0.02940598                                        | 6.997694793                        | 1217.149511                              | 99.12755859                             |
| 0.056106883                                       | 6.612562408                        | 1076.898493                              | 253.1542553                             |
| 0.036292599                                       | 6.971057872                        | 302.3333333                              | 40.06702899                             |
| 0.05090169                                        | 6.592231984                        | 337.5969925                              | 67.69924812                             |
| 0.035516108                                       | 6.829904331                        | 617.4102564                              | 69.25641026                             |
| 0.012647762                                       | 8.182141261                        | 1357.94042                               | 51.16019778                             |
| 0.017097845                                       | 7.732148083                        | 1207.831695                              | 59.12434933                             |
| 0.033479828                                       | 6.950585877                        | 523.2961165                              | 55.17475728                             |
| 0.044473259                                       | 7.091227295                        | 2354.327856                              | 405.9963851                             |
| 0.020040042                                       | 7.215560177                        | 705.6353341                              | 35.39071348                             |
| 0.061668701                                       | 6.607340788                        | 596.3588015                              | 164.6554307                             |
| 0.022070766                                       | 7.715016023                        | 1680.675592                              | 127.7676628                             |
| 0.014954346                                       | 7.9348708                          | 2718.828152                              | 113.9969828                             |
| 0.074318218                                       | 6.232512694                        | 168.1240506                              | 58.71139241                             |
| 0.047096877                                       | 6.968674216                        | 925.6923874                              | 181.8881409                             |
| 0.025918364                                       | 7.1356035                          | 443.553681                               | 33.79754601                             |
| 0.010075699                                       | 8.302333142                        | 2354.26816                               | 62.97312                                |
| 0.041998663                                       | 6.753245106                        | 1807.617039                              | 245.9861704                             |
| 0.027739794                                       | 7.268058968                        | 885.4458247                              | 80.38992409                             |
| 0.043741233                                       | 6.855246869                        | 335.2093918                              | 56.81986143                             |
| 0.030828348                                       | 7.252487278                        | 1276.427972                              | 132.2536131                             |
| 0.066108493                                       | 6.588839601                        | 474.779728                               | 150.6612549                             |
| 0.025187333                                       | 7.270033377                        | 756.0146082                              | 56.89818504                             |
| 0.018906045                                       | 7.95784346                         | 901.9747684                              | 59.19482593                             |
| 0.012767607                                       | 7.795754647                        | 509.7630402                              | 17.13412817                             |
| 0.023597342                                       | 7.459394547                        | 782.6694491                              | 56.53923205                             |
| 0.092612044                                       | 6.152029988                        | 173.5824635                              | 88.7223382                              |
| 0.041953787                                       | 6.768100072                        | 478.7410662                              | 71.61511424                             |
| 0.015140961                                       | 7.687310962                        | 871.6011116                              | 35.41470714                             |
| 0.02616376                                        | 7.221198514                        | 719.1900452                              | 52.03971845                             |
| 0.068283566                                       | 6.756036598                        | 327.0066704                              | 122.8421345                             |
| 0.072088993                                       | 6.718188107                        | 614.2621597                              | 235.6589171                             |
| 0.053607473                                       | 6.681879342                        | 736.7006183                              | 164.7357631                             |
| 0.011869946                                       | 8.020463037                        | 947.6699467                              | 28.95079951                             |
| 0.139599765                                       | 6.464139537                        | 148.6697128                              | 213.8668407                             |
| 0.017166163                                       | 7.522579538                        | 954.9924528                              | 40.94129979                             |
| 0.053139935                                       | 6.804040589                        | 634.059081                               | 145.7097009                             |
| 0.051620495                                       | 6.582089836                        | 381.1489071                              | 75.57240437                             |
| 0.097904344                                       | 6.266413639                        | 333.9234568                              | 198.2562963                             |
| 0.088905303                                       | 6.495283855                        | 198.607362                               | 115.9325153                             |
| 0.013681184                                       | 7.73401254                         | 940.1267842                              | 32.58858102                             |
| 0.024211338                                       | 7.515231538                        | 1686.159946                              | 125.4873625                             |
| 0.015302847                                       | 7.859127181                        | 1118.424848                              | 50.49939394                             |
| 0.037238626                                       | 6.816638351                        | 1332.96921                               | 162.0625                                |
| 0.034770032                                       | 7.184918966                        | 1003.45412                               | 118.9830508                             |
| 0.062807346                                       | 6.538208943                        | 628.8075967                              | 176.9282925                             |
| 0.06282105                                        | 6.502010853                        | 241.8538682                              | 65.77363897                             |
| 0.079030301                                       | 6.345830172                        | 146.3932854                              | 65.91127098                             |
| 0.012431478                                       | 8.364559936                        | 1819.233114                              | 71.77935573                             |

| wavelet.LLH_gldm_SmallDependenceEmphasis | wavelet.LLH_gldm_DependenceNonUniformityNormalized | wavelet.LLH_gldm_DependenceVariance | wavelet.LLH_gldm_LargeDependenceEmphasis |
|------------------------------------------|----------------------------------------------------|-------------------------------------|------------------------------------------|
| 0.592634812                              | 0.356706946                                        | 1.135359472                         | 4.447690858                              |
| 0.538078412                              | 0.311177328                                        | 1.611571392                         | 5.667379679                              |
| 0.542465412                              | 0.308138517                                        | 1.741625229                         | 5.899608866                              |
| 0.459471211                              | 0.254788487                                        | 2.174222051                         | 7.605936554                              |
| 0.445032896                              | 0.25279986                                         | 1.916042732                         | 7.287162162                              |
| 0.607198232                              | 0.372676768                                        | 0.906437098                         | 3.963636364                              |
| 0.558929007                              | 0.323646377                                        | 1.920103153                         | 5.957706601                              |
| 0.395627661                              | 0.206389826                                        | 3.75727788                          | 11.49412686                              |
| 0.437544717                              | 0.244427642                                        | 2.269712799                         | 8.014518258                              |
| 0.416265927                              | 0.229030338                                        | 2.365640315                         | 8.643656716                              |
| 0.469099416                              | 0.272610621                                        | 1.510856335                         | 6.25331565                               |
| 0.449703686                              | 0.25161617                                         | 1.941896377                         | 7.327114967                              |
| 0.274776429                              | 0.145296669                                        | 5.57677693                          | 18.83074451                              |
| 0.45962124                               | 0.25282717                                         | 2.032300924                         | 7.413511939                              |
| 0.383928577                              | 0.207694825                                        | 2.751462303                         | 10.01209677                              |
| 0.516987795                              | 0.286357216                                        | 2.283613419                         | 7.066270567                              |
| 0.606087847                              | 0.378232592                                        | 0.769834656                         | 3.711892797                              |
| 0.365314984                              | 0.188875273                                        | 4.017251983                         | 12.73722628                              |
| 0.470897836                              | 0.272473237                                        | 1.425822826                         | 6.11248074                               |
| 0.401456264                              | 0.225670257                                        | 2.130212429                         | 8.441431044                              |
| 0.344689458                              | 0.186810411                                        | 3.984676381                         | 12.9212963                               |
| 0.457381578                              | 0.275397448                                        | 1.347511383                         | 6.030583874                              |
| 0.44886826                               | 0.249540329                                        | 2.050521851                         | 7.525390625                              |
| 0.507165148                              | 0.294662225                                        | 1.592814727                         | 5.9180204                                |
| 0.323063737                              | 0.187583808                                        | 2.836376558                         | 11.46975648                              |
| 0.521709503                              | 0.296200519                                        | 1.725558836                         | 6.093288307                              |
| 0.648334165                              | 0.405972414                                        | 1.295705276                         | 4.260748531                              |
| 0.377237145                              | 0.202994923                                        | 3.125721426                         | 10.75307748                              |
| 0.529287477                              | 0.313083995                                        | 1.308479598                         | 5.246085011                              |
| 0.449625219                              | 0.261706088                                        | 1.716309118                         | 6.806231743                              |
| 0.373765012                              | 0.191088622                                        | 4.248566296                         | 12.91130727                              |
| 0.541691076                              | 0.317154123                                        | 1.562523112                         | 5.529274505                              |
| 0.629217229                              | 0.395533912                                        | 0.926413337                         | 3.807680396                              |
| 0.587036573                              | 0.350317791                                        | 1.215941331                         | 4.629787234                              |
| 0.499854552                              | 0.283096925                                        | 1.684766182                         | 6.250227066                              |
| 0.348228692                              | 0.176696556                                        | 4.464068216                         | 14.1903968                               |
| 0.357764758                              | 0.189728815                                        | 3.411432502                         | 11.84654663                              |
| 0.519441304                              | 0.284152705                                        | 2.571529627                         | 7.537492734                              |
| 0.556290051                              | 0.345728072                                        | 1.003275828                         | 4.403252033                              |
| 0.538556628                              | 0.313380571                                        | 1.650422134                         | 5.706740028                              |
| 0.424655187                              | 0.237134922                                        | 2.535295555                         | 8.649190439                              |
| 0.514809327                              | 0.30949868                                         | 1.223337465                         | 5.185156452                              |
| 0.443504935                              | 0.245399628                                        | 2.443183658                         | 8.231864221                              |
| 0.665501571                              | 0.431660394                                        | 0.704476665                         | 3.240353698                              |
| 0.568217262                              | 0.327885414                                        | 1.591703586                         | 5.442879499                              |
| 0.532332455                              | 0.309008796                                        | 1.334387875                         | 5.309653916                              |
| 0.502646103                              | 0.282006919                                        | 1.964489643                         | 6.673827269                              |
| 0.370070008                              | 0.231597027                                        | 1.94604299                          | 8.343283582                              |
| 0.487177364                              | 0.274775925                                        | 2.024421397                         | 6.941245593                              |
| 0.344105745                              | 0.189186084                                        | 3.128888607                         | 11.57840237                              |
| 0.580009688                              | 0.345739641                                        | 1.249564037                         | 4.727520436                              |
| 0.587107818                              | 0.361064821                                        | 1.015287794                         | 4.235241768                              |
| 0.409767449                              | 0.238674311                                        | 2.059535486                         | 8.003102837                              |
| 0.46186224                               | 0.273852657                                        | 1.523826402                         | 6.297101449                              |
| 0.449035781                              | 0.253832325                                        | 1.885994686                         | 7.221052632                              |
| 0.527551411                              | 0.316620644                                        | 1.192077844                         | 5.025641026                              |
| 0.560349635                              | 0.335708386                                        | 1.189627812                         | 4.761681088                              |
| 0.574402263                              | 0.349286204                                        | 1.156025826                         | 4.562174667                              |
| 0.547093153                              | 0.317534051                                        | 1.396065546                         | 5.285194175                              |
| 0.474915527                              | 0.257895482                                        | 3.584398071                         | 9.523167926                              |
| 0.628251856                              | 0.399567007                                        | 0.779273531                         | 3.569648924                              |
| 0.412632656                              | 0.223355356                                        | 2.783021785                         | 9.411235955                              |
| 0.505524719                              | 0.290322265                                        | 1.692660603                         | 6.131801693                              |
| 0.582101407                              | 0.356661177                                        | 0.982856603                         | 4.225501771                              |
| 0.378653826                              | 0.212815254                                        | 2.434603429                         | 9.420253165                              |
| 0.439774553                              | 0.239692488                                        | 2.408112507                         | 8.327291559                              |
| 0.561606569                              | 0.340148528                                        | 1.133708457                         | 4.634969325                              |
| 0.605789882                              | 0.376682906                                        | 0.935397274                         | 3.97024                                  |
| 0.522037816                              | 0.308625071                                        | 1.297409033                         | 5.283080075                              |
| 0.517743835                              | 0.305536862                                        | 1.358593847                         | 5.425120773                              |
| 0.465746838                              | 0.25805188                                         | 2.547962221                         | 8.050038491                              |
| 0.516955907                              | 0.297535658                                        | 1.684087567                         | 6.009324009                              |
| 0.386876661                              | 0.208328095                                        | 3.029036122                         | 10.3848179                               |
| 0.548129638                              | 0.334667821                                        | 1.055295811                         | 4.599822931                              |
| 0.519095624                              | 0.288078815                                        | 2.324773815                         | 7.087511977                              |
| 0.612375697                              | 0.379853234                                        | 0.900411113                         | 3.894187779                              |
| 0.557188533                              | 0.326656698                                        | 1.21631559                          | 4.89898331                               |
| 0.315925719                              | 0.181192551                                        | 3.630192511                         | 13.03549061                              |
| 0.482854669                              | 0.280457567                                        | 1.465344292                         | 6.009958992                              |
| 0.602211464                              | 0.372638355                                        | 0.865546039                         | 3.897819581                              |
| 0.598915403                              | 0.361583733                                        | 1.142291654                         | 4.412770236                              |
| 0.368769884                              | 0.181771357                                        | 4.84055097                          | 14.33407449                              |
| 0.370379235                              | 0.187905219                                        | 4.763490958                         | 13.80391557                              |
| 0.406075491                              | 0.239733361                                        | 1.986972814                         | 7.900748454                              |
| 0.624233435                              | 0.388548564                                        | 0.862106997                         | 3.764247642                              |
| 0.2055524                                | 0.097042893                                        | 12.04987934                         | 38.84334204                              |
| 0.634242175                              | 0.400416123                                        | 0.926532266                         | 3.768972746                              |
| 0.418969407                              | 0.231239636                                        | 2.403854247                         | 8.619256018                              |
| 0.461409708                              | 0.260347614                                        | 1.833309072                         | 6.982240437                              |
| 0.293971251                              | 0.164900472                                        | 3.956878768                         | 14.71851852                              |
| 0.322173968                              | 0.152306259                                        | 6.078992435                         | 18.52300613                              |
| 0.624822216                              | 0.39467959                                         | 0.737730008                         | 3.532325777                              |
| 0.553088728                              | 0.325325091                                        | 1.273087051                         | 5.002315261                              |
| 0.567667413                              | 0.338916621                                        | 1.309834343                         | 4.894545455                              |
| 0.513473421                              | 0.306288881                                        | 1.188853122                         | 5.168658088                              |
| 0.521138932                              | 0.293236154                                        | 1.936285                            | 6.454704851                              |
| 0.406685064                              | 0.223218884                                        | 2.56055714                          | 9.105076322                              |
| 0.438893144                              | 0.230997009                                        | 2.750258391                         | 9.074498567                              |
| 0.331045919                              | 0.175531517                                        | 3.744693454                         | 13.29976019                              |
| 0.550159259                              | 0.315073279                                        | 1.763493025                         | 5.863872532                              |

| wavelet.LLH_gldm_LargeDependenceLowGrayLevelEmphasis | wavelet.LLH_gldm_SmallDependenceHighGrayLevelEmphasis | wavelet.LLH_gldm_LargeDependenceHighGrayLevelEmphasis |
|------------------------------------------------------|-------------------------------------------------------|-------------------------------------------------------|
| 0.002632054                                          | 2623.192113                                           | 19806.99811                                           |
| 0.002737984                                          | 2130.786463                                           | 22438.39572                                           |
| 0.006316392                                          | 837.9263487                                           | 9182.893742                                           |
| 0.008312477                                          | 511.4780451                                           | 8578.920164                                           |
| 0.006701128                                          | 567.5060213                                           | 9427.915541                                           |
| 0.003674181                                          | 1516.667633                                           | 10009.23333                                           |
| 0.002998675                                          | 2028.798475                                           | 19820.83224                                           |
| 0.007472616                                          | 683.6542274                                           | 18858.32341                                           |
| 0.005627235                                          | 704.404527                                            | 12903.23339                                           |
| 0.026444544                                          | 205.6495962                                           | 3911.323694                                           |
| 0.007609065                                          | 767.804721                                            | 8664.755305                                           |
| 0.00625244                                           | 617.2263061                                           | 10039.17397                                           |
| 0.031873234                                          | 174.3180118                                           | 11796.88913                                           |
| 0.004633793                                          | 973.9498137                                           | 14627.49621                                           |
| 0.011645448                                          | 385.9148467                                           | 9853.232863                                           |
| 0.005307695                                          | 2483.210871                                           | 26457.28336                                           |
| 0.006665645                                          | 732.1027922                                           | 4674.525963                                           |
| 0.010846338                                          | 511.2595464                                           | 16974.17924                                           |
| 0.019534027                                          | 223.9915335                                           | 2892.011556                                           |
| 0.010153282                                          | 384.6622893                                           | 7967.120023                                           |
| 0.016423074                                          | 312.623619                                            | 10845.28704                                           |
| 0.00706573                                           | 514.2365045                                           | 6802.398517                                           |
| 0.010526834                                          | 419.5186537                                           | 6906.864258                                           |
| 0.003566062                                          | 1043.971585                                           | 12370.49188                                           |
| 0.041808871                                          | 105.2294354                                           | 3485.177533                                           |
| 0.003083564                                          | 1314.252313                                           | 15307.77839                                           |
| 0.002004094                                          | 3674.514115                                           | 24736.20662                                           |
| 0.012775454                                          | 351.1164077                                           | 9870.109341                                           |
| 0.00524276                                           | 1331.648871                                           | 12901.59732                                           |
| 0.005251473                                          | 697.3323458                                           | 10938.66748                                           |
| 0.007035905                                          | 756.1271294                                           | 25651.08827                                           |
| 0.004739646                                          | 2373.351951                                           | 27209.40744                                           |
| 0.00119431                                           | 6167.281362                                           | 38497.57572                                           |
| 0.003895251                                          | 2553.244174                                           | 17476.77362                                           |
| 0.005404305                                          | 696.2922182                                           | 8545.188692                                           |
| 0.01881884                                           | 313.4061954                                           | 11399.84195                                           |
| 0.010186039                                          | 478.0650323                                           | 15639.06987                                           |
| 0.00312045                                           | 3329.890148                                           | 46205.19996                                           |
| 0.003809846                                          | 1120.597706                                           | 9948.977236                                           |
| 0.001277126                                          | 4498.663793                                           | 40665.52297                                           |
| 0.006856796                                          | 604.3278115                                           | 12335.92367                                           |
| 0.009124423                                          | 398.1620302                                           | 3963.799328                                           |
| 0.006290878                                          | 702.7269951                                           | 12251.60608                                           |
| 0.00173475                                           | 4098.553308                                           | 18687.07395                                           |
| 0.00172106                                           | 4777.148738                                           | 52834.8482                                            |
| 0.002889305                                          | 2417.094576                                           | 19543.97086                                           |
| 0.002404429                                          | 1645.822631                                           | 21471.49496                                           |
| 0.023316991                                          | 150.5952408                                           | 3471.685419                                           |
| 0.014288151                                          | 315.8685399                                           | 4255.492362                                           |
| 0.042782488                                          | 107.1638778                                           | 3504.003698                                           |
| 0.001918275                                          | 2746.997052                                           | 27203.76684                                           |
| 0.001640708                                          | 2088.405801                                           | 15478.55028                                           |
| 0.0136549                                            | 310.5921                                              | 6172.346188                                           |
| 0.006057018                                          | 1036.964421                                           | 13855.02446                                           |
| 0.008605236                                          | 470.3398414                                           | 7639.878947                                           |
| 0.005907406                                          | 625.4114983                                           | 6383.169231                                           |
| 0.002440023                                          | 2723.490611                                           | 20073.8801                                            |
| 0.002138742                                          | 2157.11785                                            | 19001.1258                                            |
| 0.009696862                                          | 907.8807974                                           | 8360.756675                                           |
| 0.005532506                                          | 995.5771987                                           | 18280.37343                                           |
| 0.003068597                                          | 1499.198302                                           | 8776.834655                                           |
| 0.017649789                                          | 306.042173                                            | 6718.672285                                           |
| 0.002342785                                          | 1975.871724                                           | 22655.96666                                           |
| 0.004368151                                          | 2045.5575                                             | 15437.61656                                           |
| 0.028971093                                          | 165.0664562                                           | 3613.867089                                           |
| 0.005301999                                          | 814.586371                                            | 14827.15355                                           |
| 0.004592638                                          | 1194.911231                                           | 10151.42101                                           |
| 0.003260432                                          | 3792.198654                                           | 20801.94288                                           |
| 0.002805937                                          | 1110.010007                                           | 11360.09408                                           |
| 0.006093123                                          | 811.2871906                                           | 8062.41891                                            |
| 0.00856802                                           | 583.8160438                                           | 9835.877598                                           |
| 0.003893673                                          | 1107.469838                                           | 12535.51445                                           |
| 0.012304387                                          | 361.3613646                                           | 9637.870557                                           |
| 0.002254444                                          | 1707.693032                                           | 15121.72953                                           |
| 0.012700924                                          | 1589.816308                                           | 10780.52539                                           |
| 0.002939071                                          | 2673.263943                                           | 17336.42697                                           |
| 0.001747803                                          | 2688.548273                                           | 24027.56302                                           |
| 0.055536115                                          | 93.89066764                                           | 3402.008351                                           |
| 0.005416189                                          | 671.5302171                                           | 8611.644405                                           |
| 0.00237364                                           | 2409.209028                                           | 16418.64771                                           |
| 0.00273439                                           | 2607.602891                                           | 19583.28959                                           |
| 0.010158872                                          | 578.7094406                                           | 22046.43191                                           |
| 0.016538789                                          | 364.6234935                                           | 12383.68584                                           |
| 0.017568925                                          | 314.8537946                                           | 5882.122681                                           |
| 0.002409663                                          | 4196.54087                                            | 30304.27388                                           |
| 0.104819795                                          | 109.1880612                                           | 15586.35183                                           |
| 0.002280064                                          | 2395.753524                                           | 14752.60964                                           |
| 0.008429182                                          | 505.6029534                                           | 10258.19657                                           |
| 0.009670102                                          | 459.4515227                                           | 6892.73224                                            |
| 0.024331753                                          | 186.3148974                                           | 9389.009877                                           |
| 0.012198819                                          | 573.5144745                                           | 31380.82975                                           |
| 0.004802817                                          | 1635.082838                                           | 10120.79135                                           |
| 0.002008516                                          | 1936.043645                                           | 18640.57978                                           |
| 0.004179756                                          | 2508.358232                                           | 23861.27                                              |
| 0.007030534                                          | 524.1354794                                           | 5614.559053                                           |
| 0.003322295                                          | 1420.141483                                           | 16632.54383                                           |
| 0.010803905                                          | 372.3408494                                           | 8412.228257                                           |
| 0.007987921                                          | 624.3252259                                           | 12557.97612                                           |
| 0.041852677                                          | 148.554097                                            | 6018.366906                                           |
| 0.0017156                                            | 4026.060637                                           | 40487.59595                                           |

| wavelet.LLH_gldm_SmallDependenceLowGrayLevelEmphasis | wavelet.LLH_gldm_LowGrayLevelEmphasis | wavelet.LLH_gldm_DistanceZoneVariabilityNormalized | wavelet.LLH_gldm_LowIntensityEmphasis |
|------------------------------------------------------|---------------------------------------|----------------------------------------------------|---------------------------------------|
| 0.000905584                                          | 0.001089098                           | 0.998598459                                        | 0.00140932                            |
| 0.001330909                                          | 0.001459933                           | 1                                                  | 0.002180499                           |
| 0.001541621                                          | 0.001981093                           | 1                                                  | 0.002633807                           |
| 0.001598742                                          | 0.002140761                           | 1                                                  | 0.00318106                            |
| 0.000964834                                          | 0.001458117                           | 1                                                  | 0.002001318                           |
| 0.002246724                                          | 0.002417886                           | 1                                                  | 0.003338835                           |
| 0.000557592                                          | 0.000784832                           | 0.99000253                                         | 0.00094948                            |
| 0.000525244                                          | 0.000906314                           | 0.998259357                                        | 0.001248769                           |
| 0.000596388                                          | 0.000993107                           | 0.999136069                                        | 0.001284965                           |
| 0.00459074                                           | 0.006410765                           | 1                                                  | 0.010109461                           |
| 0.001852438                                          | 0.002379563                           | 1                                                  | 0.003502029                           |
| 0.000890816                                          | 0.001334219                           | 0.993350032                                        | 0.001830583                           |
| 0.001237774                                          | 0.002520996                           | 1                                                  | 0.004319082                           |
| 0.000913833                                          | 0.001207665                           | 1                                                  | 0.001810653                           |
| 0.001268541                                          | 0.00197916                            | 1                                                  | 0.003081597                           |
| 0.000388877                                          | 0.001037395                           | 1                                                  | 0.000966017                           |
| 0.003321816                                          | 0.003764808                           | 1                                                  | 0.00493345                            |
| 0.001262693                                          | 0.00176017                            | 1                                                  | 0.003144088                           |
| 0.003892555                                          | 0.005533555                           | 1                                                  | 0.007647866                           |
| 0.001080678                                          | 0.001771485                           | 0.999171156                                        | 0.002497049                           |
| 0.000824254                                          | 0.001627436                           | 0.998337491                                        | 0.002237637                           |
| 0.001748698                                          | 0.002286535                           | 1                                                  | 0.003402421                           |
| 0.001742426                                          | 0.00251046                            | 1                                                  | 0.003569604                           |
| 0.000748843                                          | 0.001016704                           | 0.998722861                                        | 0.001346671                           |
| 0.002482938                                          | 0.004899654                           | 1                                                  | 0.007236392                           |
| 0.000725893                                          | 0.00093527                            | 1                                                  | 0.001272839                           |
| 0.000794737                                          | 0.000927996                           | 1                                                  | 0.001141648                           |
| 0.001003057                                          | 0.001721922                           | 1                                                  | 0.002461401                           |
| 0.003183162                                          | 0.003399296                           | 1                                                  | 0.005260057                           |
| 0.000974027                                          | 0.001354603                           | 1                                                  | 0.001950308                           |
| 0.000528161                                          | 0.00086149                            | 1                                                  | 0.001320887                           |
| 0.00089236                                           | 0.001361916                           | 0.996908817                                        | 0.001583234                           |
| 0.000518434                                          | 0.000603749                           | 0.996526281                                        | 0.000754512                           |
| 0.001089633                                          | 0.001382712                           | 1                                                  | 0.001733062                           |
| 0.000753725                                          | 0.001178557                           | 0.994468632                                        | 0.001433931                           |
| 0.000922202                                          | 0.001764127                           | 0.996572418                                        | 0.002514171                           |
| 0.000755058                                          | 0.001363728                           | 0.998668443                                        | 0.002053084                           |
| 0.000453524                                          | 0.00067726                            | 0.98762263                                         | 0.000832499                           |
| 0.001347188                                          | 0.001665319                           | 1                                                  | 0.002193559                           |
| 0.000247881                                          | 0.000336603                           | 0.99823009                                         | 0.000424568                           |
| 0.00080197                                           | 0.001244231                           | 1                                                  | 0.001739113                           |
| 0.001687076                                          | 0.002507503                           | 0.99656506                                         | 0.003075294                           |
| 0.000711322                                          | 0.001123965                           | 0.998931053                                        | 0.001496721                           |
| 0.000749447                                          | 0.000882419                           | 0.998917749                                        | 0.001054524                           |
| 0.000951104                                          | 0.001024424                           | 1                                                  | 0.001505303                           |
| 0.000598309                                          | 0.000822687                           | 1                                                  | 0.001039882                           |
| 0.00040367                                           | 0.000565185                           | 0.999237805                                        | 0.000743678                           |
| 0.002694766                                          | 0.004365993                           | 1                                                  | 0.006568144                           |
| 0.002588363                                          | 0.003586288                           | 1                                                  | 0.004861421                           |
| 0.002943444                                          | 0.005396968                           | 0.996330288                                        | 0.007934237                           |
| 0.000753767                                          | 0.000892316                           | 0.998815166                                        | 0.001194809                           |
| 0.000564471                                          | 0.000689648                           | 0.999121651                                        | 0.000876663                           |
| 0.000937219                                          | 0.002168164                           | 0.999076213                                        | 0.002435987                           |
| 0.001424505                                          | 0.001945291                           | 1                                                  | 0.002759379                           |
| 0.001742412                                          | 0.002329619                           | 1                                                  | 0.003488058                           |
| 0.001370589                                          | 0.001893119                           | 1                                                  | 0.002410026                           |
| 0.000504286                                          | 0.000705643                           | 0.993142938                                        | 0.000842533                           |
| 0.000694002                                          | 0.000872933                           | 1                                                  | 0.00112891                            |
| 0.001527733                                          | 0.002828454                           | 1                                                  | 0.003069653                           |
| 0.000450966                                          | 0.000766464                           | 0.994385447                                        | 0.000917776                           |
| 0.001199562                                          | 0.001444563                           | 0.996830436                                        | 0.001764159                           |
| 0.001193437                                          | 0.002670255                           | 1                                                  | 0.00314705                            |
| 0.00041896                                           | 0.000603624                           | 0.989961873                                        | 0.000775822                           |
| 0.000814817                                          | 0.001225358                           | 0.977117108                                        | 0.001356216                           |
| 0.002645039                                          | 0.004472696                           | 1                                                  | 0.006341235                           |
| 0.000634644                                          | 0.000973656                           | 0.99286815                                         | 0.001339001                           |
| 0.001430305                                          | 0.001811631                           | 1                                                  | 0.002324376                           |
| 0.000457603                                          | 0.000870435                           | 0.986621137                                        | 0.000829659                           |
| 0.000475514                                          | 0.000714638                           | 1                                                  | 0.000856917                           |
| 0.001182735                                          | 0.001715825                           | 1                                                  | 0.002135009                           |
| 0.001426931                                          | 0.00197627                            | 1                                                  | 0.002783826                           |
| 0.000653874                                          | 0.000975287                           | 0.99530519                                         | 0.001205247                           |
| 0.001077972                                          | 0.001776423                           | 1                                                  | 0.002566857                           |
| 0.000721468                                          | 0.000907098                           | 0.998616875                                        | 0.001190993                           |
| 0.001109303                                          | 0.002281865                           | 1                                                  | 0.002347893                           |
| 0.001564472                                          | 0.001737784                           | 1                                                  | 0.002305943                           |
| 0.000645725                                          | 0.00076455                            | 1                                                  | 0.001046146                           |
| 0.003253438                                          | 0.006164813                           | 1                                                  | 0.009600919                           |
| 0.001155546                                          | 0.001582155                           | 1                                                  | 0.002187813                           |
| 0.001211259                                          | 0.001354289                           | 1                                                  | 0.0018028                             |
| 0.000959564                                          | 0.001147756                           | 1                                                  | 0.00147824                            |
| 0.000879574                                          | 0.001306411                           | 1                                                  | 0.002180418                           |
| 0.000965966                                          | 0.001710644                           | 0.997086678                                        | 0.002459893                           |
| 0.000984657                                          | 0.002712128                           | 1                                                  | 0.002596126                           |
| 0.001320066                                          | 0.001470621                           | 0.997675773                                        | 0.001923304                           |
| 0.001048519                                          | 0.00400107                            | 1                                                  | 0.006369112                           |
| 0.001160158                                          | 0.001306165                           | 0.998828354                                        | 0.001671889                           |
| 0.001058527                                          | 0.001597565                           | 1                                                  | 0.002325127                           |
| 0.001684305                                          | 0.002419939                           | 1                                                  | 0.003378906                           |
| 0.001131654                                          | 0.002283668                           | 1                                                  | 0.003578309                           |
| 0.001277965                                          | 0.001691948                           | 0.995735627                                        | 0.003629414                           |
| 0.001172272                                          | 0.001725129                           | 0.997635937                                        | 0.001864173                           |
| 0.000500166                                          | 0.000661893                           | 0.990920286                                        | 0.000839949                           |
| 0.000634095                                          | 0.00100694                            | 1                                                  | 0.001110017                           |
| 0.001774967                                          | 0.002373925                           | 0.998474448                                        | 0.003151496                           |
| 0.000605402                                          | 0.000825688                           | 0.998028587                                        | 0.001081647                           |
| 0.000916126                                          | 0.001603869                           | 1                                                  | 0.002096787                           |
| 0.001496748                                          | 0.001939788                           | 1                                                  | 0.003128394                           |
| 0.001934348                                          | 0.005510771                           | 1                                                  | 0.006854254                           |
| 0.000390306                                          | 0.000504235                           | 0.992839531                                        | 0.000656503                           |

| wavelet.LLH_gldzm_LargeDistanceEmphasis | wavelet.LLH_gldzm_HighIntensitySmallDistanceEmphasis | wavelet.LLH_gldzm_LowIntensityLargeDistanceEmphasis | wavelet.LLH_gldzm_HighIntensityEmphasis |
|-----------------------------------------|------------------------------------------------------|-----------------------------------------------------|-----------------------------------------|
| 1.002103787                             | 4424.037167                                          | 0.001409803                                         | 4426.328191                             |
| 1                                       | 4003.650602                                          | 0.002180499                                         | 4003.650602                             |
| 1                                       | 1546.464968                                          | 0.002633807                                         | 1546.464968                             |
| 1                                       | 1113.513619                                          | 0.00318106                                          | 1113.513619                             |
| 1                                       | 1273.48824                                           | 0.002001318                                         | 1273.48824                              |
| 1                                       | 2499.827051                                          | 0.003338835                                         | 2499.827051                             |
| 1.015075377                             | 3611.886516                                          | 0.000953676                                         | 3630.737018                             |
| 1.00261324                              | 1731.437391                                          | 0.001249884                                         | 1732.97561                              |
| 1.001296456                             | 1614.272796                                          | 0.001287039                                         | 1614.475367                             |
| 1                                       | 501.9555985                                          | 0.010109461                                         | 501.9555985                             |
| 1                                       | 1628.023952                                          | 0.003502029                                         | 1628.023952                             |
| 1.01000834                              | 1380.191201                                          | 0.001848277                                         | 1382.428691                             |
| 1                                       | 639.7560976                                          | 0.004319082                                         | 639.7560976                             |
| 1                                       | 2121.721729                                          | 0.001810653                                         | 2121.721729                             |
| 1                                       | 1010.667436                                          | 0.003081597                                         | 1010.667436                             |
| 1                                       | 4726.464147                                          | 0.000966017                                         | 4726.464147                             |
| 1                                       | 1213.740651                                          | 0.00493345                                          | 1213.740651                             |
| 1                                       | 1403.882813                                          | 0.003144088                                         | 1403.882813                             |
| 1                                       | 476.883427                                           | 0.007647866                                         | 476.883427                              |
| 1.001243781                             | 963.4589552                                          | 0.002499619                                         | 963.6094527                             |
| 1.00249584                              | 913.8244592                                          | 0.00224197                                          | 914.1838602                             |
| 1                                       | 1125.747423                                          | 0.003402421                                         | 1125.747423                             |
| 1                                       | 935.6294227                                          | 0.003569604                                         | 935.6294227                             |
| 1.001916933                             | 2062.846166                                          | 0.001347408                                         | 2064.092652                             |
| 1                                       | 328.215812                                           | 0.007236392                                         | 328.215812                              |
| 1                                       | 2524.579281                                          | 0.001272839                                         | 2524.579281                             |
| 1                                       | 5683.97813                                           | 0.001141648                                         | 5683.97813                              |
| 1                                       | 942.8807947                                          | 0.002461401                                         | 942.8807947                             |
| 1                                       | 2489.70438                                           | 0.005260057                                         | 2489.70438                              |
| 1                                       | 1561.517939                                          | 0.001950308                                         | 1561.517939                             |
| 1                                       | 2030.334993                                          | 0.001320887                                         | 2030.334993                             |
| 1.004643963                             | 4438.448336                                          | 0.001583855                                         | 4447.135449                             |
| 1.005219661                             | 9821.212157                                          | 0.000755856                                         | 9832.809917                             |
| 1                                       | 4283.495189                                          | 0.001733062                                         | 4283.495189                             |
| 1.008320127                             | 1393.888867                                          | 0.001452791                                         | 1396.297544                             |
| 1.005150215                             | 906.5109442                                          | 0.002520279                                         | 907.7476395                             |
| 1.001998668                             | 1340.618254                                          | 0.002054116                                         | 1341.58561                              |
| 1.018682399                             | 6344.087512                                          | 0.000909803                                         | 6377.6765                               |
| 1                                       | 2037.64831                                           | 0.002193559                                         | 2037.64831                              |
| 1.002657219                             | 8312.791685                                          | 0.000425315                                         | 8316.502657                             |
| 1                                       | 1426.045879                                          | 0.001739113                                         | 1426.045879                             |
| 1.00516129                              | 770.8002151                                          | 0.003088784                                         | 771.6163441                             |
| 1.001604278                             | 1585.826203                                          | 0.001497549                                         | 1586.602674                             |
| 1.001624256                             | 6116.172848                                          | 0.001054628                                         | 6122.517596                             |
| 1                                       | 8545.691463                                          | 0.001505303                                         | 8545.691463                             |
| 1                                       | 4515.119714                                          | 0.001039882                                         | 4515.119714                             |
| 1.001143729                             | 3287.595215                                          | 0.000744085                                         | 3288.398399                             |
| 1                                       | 408.4155844                                          | 0.006568144                                         | 408.4155844                             |
| 1                                       | 644.2463768                                          | 0.004861421                                         | 644.2463768                             |
| 1.005514706                             | 312.7279412                                          | 0.007948024                                         | 313.2794118                             |
| 1.001778305                             | 4786.668791                                          | 0.001195205                                         | 4788.664493                             |
| 1.001318102                             | 3566.583919                                          | 0.000876985                                         | 3567.933656                             |
| 1.001386322                             | 764.2735675                                          | 0.002438394                                         | 764.4731978                             |
| 1                                       | 2260.65894                                           | 0.002759379                                         | 2260.65894                              |
| 1                                       | 1051.198856                                          | 0.003488058                                         | 1051.198856                             |
| 1                                       | 1191.836106                                          | 0.002410026                                         | 1191.836106                             |
| 1.010321101                             | 4809.397745                                          | 0.0008454                                           | 4822.996942                             |
| 1                                       | 3775.714536                                          | 0.001112891                                         | 3775.714536                             |
| 1                                       | 1647.065302                                          | 0.003069653                                         | 1647.065302                             |
| 1.008445606                             | 2093.030213                                          | 0.00092337                                          | 2097.314699                             |
| 1.004761905                             | 2381.425595                                          | 0.001765996                                         | 2384.607143                             |
| 1                                       | 745.3674603                                          | 0.00314705                                          | 745.3674603                             |
| 1.015133531                             | 3856.41773                                           | 0.000781625                                         | 3869.437685                             |
| 1.03472631                              | 3484.276682                                          | 0.001385114                                         | 3514.183834                             |
| 1                                       | 437.5434174                                          | 0.006341235                                         | 437.5434174                             |
| 1.010736196                             | 1853.544606                                          | 0.001345306                                         | 1858.814928                             |
| 1                                       | 2133.862722                                          | 0.002324376                                         | 2133.862722                             |
| 1.020204366                             | 6150.185207                                          | 0.000835012                                         | 6184.25778                              |
| 1                                       | 2130.182383                                          | 0.000856917                                         | 2130.182383                             |
| 1                                       | 1561.107184                                          | 0.002135009                                         | 1561.107184                             |
| 1                                       | 1257.706629                                          | 0.002783826                                         | 1257.706629                             |
| 1.007058824                             | 2143.060196                                          | 0.001207571                                         | 2148.561961                             |
| 1                                       | 945.3023483                                          | 0.002566857                                         | 945.3023483                             |
| 1.002076125                             | 3125.190484                                          | 0.001191484                                         | 3127.383391                             |
| 1                                       | 3019.506233                                          | 0.002347893                                         | 3019.506233                             |
| 1                                       | 4403.190578                                          | 0.002305943                                         | 4403.190578                             |
| 1                                       | 4861.561724                                          | 0.001046146                                         | 4861.561724                             |
| 1                                       | 296.4195402                                          | 0.009600919                                         | 296.4195402                             |
| 1                                       | 1394.944734                                          | 0.002187813                                         | 1394.944734                             |
| 1                                       | 4020.819083                                          | 0.0018028                                           | 4020.819083                             |
| 1                                       | 4361.677539                                          | 0.00147824                                          | 4361.677539                             |
| 1                                       | 1575.089828                                          | 0.002180418                                         | 1575.089828                             |
| 1.004376368                             | 986.4896061                                          | 0.002468864                                         | 987.0503282                             |
| 1                                       | 774.3204082                                          | 0.002596126                                         | 774.3204082                             |
| 1.003490401                             | 6785.417103                                          | 0.00192374                                          | 6792.516579                             |
| 1                                       | 546.8313609                                          | 0.006369112                                         | 546.8313609                             |
| 1.001758499                             | 3794.518904                                          | 0.001672332                                         | 3796.263775                             |
| 1                                       | 1214.494729                                          | 0.002325127                                         | 1214.494729                             |
| 1                                       | 997.289172                                           | 0.003378906                                         | 997.289172                              |
| 1                                       | 641.7058824                                          | 0.003578309                                         | 641.7058824                             |
| 1.006410256                             | 1787.870192                                          | 0.003631878                                         | 1792.038462                             |
| 1.003550296                             | 2629.647337                                          | 0.001865374                                         | 2632.760947                             |
| 1.01368197                              | 3511.275996                                          | 0.000845722                                         | 3521.496199                             |
| 1                                       | 4442.894101                                          | 0.001110017                                         | 4442.894101                             |
| 1.002290076                             | 1024.261164                                          | 0.003153451                                         | 1024.946183                             |
| 1.002960039                             | 2726.736556                                          | 0.001082634                                         | 2728.981746                             |
| 1                                       | 922.0513775                                          | 0.002096787                                         | 922.0513775                             |
| 1                                       | 1424.686654                                          | 0.003128394                                         | 1424.686654                             |
| 1                                       | 443.7529762                                          | 0.006854254                                         | 443.7529762                             |
| 1.010779436                             | 7259.665354                                          | 0.000658646                                         | 7281.653123                             |

| wavelet.LLH_gldzm_DistanceZoneVariability | wavelet.LLH_gldzm_ZonePercentage | wavelet.LLH_gldzm_IntensityVariabilityNormalized | wavelet.LLH_gldzm_LowIntensitySmallDistanceEmphasis | wavelet.LLH_gldzm_IntensityVariability |
|-------------------------------------------|----------------------------------|--------------------------------------------------|-----------------------------------------------------|----------------------------------------|
| 1424.001403                               | 0.67200754                       | 0.021353584                                      | 0.001409199                                         | 30.45021038                            |
| 581                                       | 0.621390374                      | 0.022949292                                      | 0.002180499                                         | 13.33390706                            |
| 942                                       | 0.614080834                      | 0.022362863                                      | 0.002633807                                         | 21.06581741                            |
| 514                                       | 0.526100307                      | 0.041311781                                      | 0.00318106                                          | 21.23735409                            |
| 1233                                      | 0.520692568                      | 0.03902087                                       | 0.002001318                                         | 48.11273317                            |
| 451                                       | 0.683333333                      | 0.026209311                                      | 0.003338835                                         | 11.82039911                            |
| 3546.180905                               | 0.633870111                      | 0.013819641                                      | 0.000948431                                         | 49.50195422                            |
| 2292.003484                               | 0.449490995                      | 0.037261439                                      | 0.001284491                                         | 85.55226481                            |
| 2312.000864                               | 0.509018918                      | 0.037352958                                      | 0.001284446                                         | 86.43474503                            |
| 518                                       | 0.483208955                      | 0.045020199                                      | 0.010109461                                         | 23.32046332                            |
| 835                                       | 0.553713528                      | 0.025663165                                      | 0.003502029                                         | 21.42874251                            |
| 1191.026689                               | 0.520173536                      | 0.037169562                                      | 0.001826159                                         | 44.56630525                            |
| 574                                       | 0.307445099                      | 0.05627117                                       | 0.004319082                                         | 32.29965157                            |
| 902                                       | 0.525334886                      | 0.029699952                                      | 0.001810653                                         | 26.78935698                            |
| 866                                       | 0.436491935                      | 0.044858632                                      | 0.003081597                                         | 38.84757506                            |
| 2566                                      | 0.586380256                      | 0.012515727                                      | 0.000966017                                         | 32.11535464                            |
| 829                                       | 0.694304858                      | 0.025549889                                      | 0.00493345                                          | 21.18094089                            |
| 512                                       | 0.415247364                      | 0.038482666                                      | 0.003144088                                         | 19.703125                              |
| 712                                       | 0.54853621                       | 0.039479706                                      | 0.007647866                                         | 28.10955056                            |
| 2410.000829                               | 0.463935372                      | 0.043914273                                      | 0.002496407                                         | 105.9212272                            |
| 1200.001664                               | 0.397486772                      | 0.045680937                                      | 0.002236554                                         | 54.90848586                            |
| 582                                       | 0.539388323                      | 0.041449676                                      | 0.003402421                                         | 24.12371134                            |
| 537                                       | 0.524414063                      | 0.040195028                                      | 0.003569604                                         | 21.58472998                            |
| 1563.001278                               | 0.591235361                      | 0.030640305                                      | 0.001346487                                         | 47.95207668                            |
| 468                                       | 0.367635507                      | 0.056665989                                      | 0.007236392                                         | 26.52136752                            |
| 1419                                      | 0.598986914                      | 0.029821297                                      | 0.001272839                                         | 42.31642001                            |
| 2332                                      | 0.721311475                      | 0.011386438                                      | 0.001141648                                         | 26.55317324                            |
| 1208                                      | 0.437364229                      | 0.041662098                                      | 0.002461401                                         | 50.32781457                            |
| 274                                       | 0.612975391                      | 0.030236027                                      | 0.005260057                                         | 8.284671533                            |
| 1087                                      | 0.529211295                      | 0.033959083                                      | 0.001950308                                         | 36.91352346                            |
| 2009                                      | 0.422236234                      | 0.035463857                                      | 0.001320887                                         | 71.246889                              |
| 1288.006192                               | 0.624456259                      | 0.015603284                                      | 0.001583079                                         | 20.15944272                            |
| 2291.013919                               | 0.711985135                      | 0.008604645                                      | 0.000754177                                         | 19.78207916                            |
| 1559                                      | 0.663404255                      | 0.011148822                                      | 0.001733062                                         | 17.38101347                            |
| 2510.038827                               | 0.57311535                       | 0.031463717                                      | 0.001429216                                         | 79.41442155                            |
| 1161.006867                               | 0.388462821                      | 0.043284643                                      | 0.002512645                                         | 50.42660944                            |
| 1499.001332                               | 0.403386187                      | 0.042159324                                      | 0.002052826                                         | 63.2811459                             |
| 3013.236644                               | 0.591164503                      | 0.009368218                                      | 0.000813172                                         | 28.58243199                            |
| 799                                       | 0.649593496                      | 0.024302907                                      | 0.002193559                                         | 19.41802253                            |
| 4508.007086                               | 0.621182944                      | 0.010970932                                      | 0.000424381                                         | 49.54472985                            |
| 1286                                      | 0.495759445                      | 0.037271828                                      | 0.001739113                                         | 47.93157076                            |
| 2317.013763                               | 0.601241272                      | 0.036929125                                      | 0.003071921                                         | 85.86021505                            |
| 1868.00107                                | 0.511908021                      | 0.034978981                                      | 0.001496513                                         | 65.41069519                            |
| 1845.001083                               | 0.742363344                      | 0.010999584                                      | 0.001054498                                         | 20.31672983                            |
| 820                                       | 0.641627543                      | 0.012825699                                      | 0.001505303                                         | 10.51707317                            |
| 1679                                      | 0.611657559                      | 0.014719545                                      | 0.001039882                                         | 24.71411554                            |
| 2621.000762                               | 0.57496712                       | 0.030108592                                      | 0.000743576                                         | 78.97483797                            |
| 385                                       | 0.442020666                      | 0.05393827                                       | 0.006568144                                         | 20.76623377                            |
| 483                                       | 0.567567568                      | 0.041334997                                      | 0.004861421                                         | 19.96480331                            |
| 542.0036765                               | 0.402366864                      | 0.059134407                                      | 0.00793079                                          | 32.16911765                            |
| 1685.001186                               | 0.656675749                      | 0.013368733                                      | 0.00119471                                          | 22.55305276                            |
| 2274.000879                               | 0.675170573                      | 0.026650832                                      | 0.000876582                                         | 60.6572935                             |
| 2162.000924                               | 0.479609929                      | 0.042823501                                      | 0.002435385                                         | 92.67005545                            |
| 604                                       | 0.547101449                      | 0.02776194                                       | 0.002759379                                         | 16.76821192                            |
| 699                                       | 0.52556391                       | 0.038520183                                      | 0.003488058                                         | 26.92560801                            |
| 1202                                      | 0.616410256                      | 0.031202848                                      | 0.002410026                                         | 37.50582363                            |
| 2598.061927                               | 0.646724351                      | 0.011779136                                      | 0.000841816                                         | 30.81422018                            |
| 2284                                      | 0.660497397                      | 0.015319776                                      | 0.001112891                                         | 34.99036778                            |
| 1026                                      | 0.622572816                      | 0.02629489                                       | 0.003069653                                         | 26.9785575                             |
| 4945.078826                               | 0.544747508                      | 0.031272471                                      | 0.000916377                                         | 155.5179972                            |
| 1256.006349                               | 0.713476784                      | 0.019591837                                      | 0.001763699                                         | 24.68571429                            |
| 1260                                      | 0.471910112                      | 0.038887629                                      | 0.00314705                                          | 48.9984127                             |
| 3336.171513                               | 0.582138539                      | 0.020380385                                      | 0.000774371                                         | 68.68189911                            |
| 4980.365902                               | 0.688634396                      | 0.014395901                                      | 0.001348991                                         | 73.3759074                             |
| 357                                       | 0.451898734                      | 0.050992946                                      | 0.006341235                                         | 18.20448179                            |
| 1942.050102                               | 0.50647333                       | 0.030838989                                      | 0.001337425                                         | 60.32106339                            |
| 845                                       | 0.648006135                      | 0.022678478                                      | 0.002324376                                         | 19.16331361                            |
| 4248.390618                               | 0.68896                          | 0.009948313                                      | 0.000828321                                         | 42.83743614                            |
| 3542                                      | 0.604746457                      | 0.034550467                                      | 0.000856917                                         | 122.3777527                            |
| 1754                                      | 0.605244997                      | 0.02373334                                       | 0.002135009                                         | 41.62827822                            |
| 709                                       | 0.545804465                      | 0.031174841                                      | 0.002783826                                         | 22.10296192                            |
| 2538.028235                               | 0.594405594                      | 0.024684045                                      | 0.001204666                                         | 62.94431373                            |
| 1022                                      | 0.448442299                      | 0.042859441                                      | 0.002566857                                         | 43.80234834                            |
| 1443.001384                               | 0.639663568                      | 0.023005591                                      | 0.00119087                                          | 33.24359862                            |
| 1845                                      | 0.589268604                      | 0.014509588                                      | 0.002347893                                         | 26.7701897                             |
| 934                                       | 0.695976155                      | 0.012251879                                      | 0.002305943                                         | 11.44325482                            |
| 1531                                      | 0.638981636                      | 0.019931646                                      | 0.001046146                                         | 30.51534944                            |
| 348                                       | 0.363256785                      | 0.05623266                                       | 0.009600919                                         | 19.56865552                            |
| 959                                       | 0.561804335                      | 0.032118746                                      | 0.002187813                                         | 30.80187696                            |
| 1614                                      | 0.690038478                      | 0.014806165                                      | 0.0018028                                           | 23.89714994                            |
| 1349                                      | 0.678230266                      | 0.021532574                                      | 0.00147824                                          | 29.04744255                            |
| 757                                       | 0.420789327                      | 0.036002157                                      | 0.002180418                                         | 27.25363276                            |
| 1367.005835                               | 0.41939431                       | 0.04054338                                       | 0.00245765                                          | 55.58497447                            |
| 1470                                      | 0.478359909                      | 0.042137998                                      | 0.002596126                                         | 61.94285714                            |
| 1715.004654                               | 0.704797048                      | 0.010737536                                      | 0.001923194                                         | 18.45782432                            |
| 338                                       | 0.220626632                      | 0.052939323                                      | 0.006369112                                         | 17.89349112                            |
| 1704.001172                               | 0.715303983                      | 0.015924075                                      | 0.001671778                                         | 27.16647128                            |
| 1328                                      | 0.484318016                      | 0.036211488                                      | 0.002325127                                         | 48.08885542                            |
| 785                                       | 0.536202186                      | 0.039058785                                      | 0.003378906                                         | 30.6611465                             |
| 680                                       | 0.335802469                      | 0.061224048                                      | 0.003578309                                         | 41.63235294                            |
| 466.0042735                               | 0.358895706                      | 0.038817664                                      | 0.003628797                                         | 18.16666667                            |
| 1686.004734                               | 0.709487825                      | 0.01375302                                       | 0.001863873                                         | 23.24260355                            |
| 3259.13682                                | 0.634574571                      | 0.020104699                                      | 0.000838505                                         | 66.12435391                            |
| 2153                                      | 0.652424242                      | 0.014407574                                      | 0.001110017                                         | 31.01950766                            |
| 2616.003053                               | 0.602022059                      | 0.03292145                                       | 0.003151008                                         | 86.25419847                            |
| 2023.003947                               | 0.592343659                      | 0.024814243                                      | 0.0010814                                           | 50.29847065                            |
| 1343                                      | 0.476748314                      | 0.047161615                                      | 0.002096787                                         | 63.33804914                            |
| 517                                       | 0.493791786                      | 0.037962655                                      | 0.003128394                                         | 19.62669246                            |
| 336                                       | 0.402877698                      | 0.056193311                                      | 0.006854254                                         | 18.88095238                            |
| 3592.093422                               | 0.626602009                      | 0.011152548                                      | 0.000655967                                         | 40.34991708                            |



| wavelet.LLH_gldzm_HighIntensityLargeDistanceEmphasis | wavelet.LLH_gldzm_SmallDistanceEmphasis | wavelet.LLH_glcm_SumVariance | wavelet.LLH_glcm_Homogeneity1 | wavelet.LLH_glcm_Homogeneity2 |
|------------------------------------------------------|-----------------------------------------|------------------------------|-------------------------------|-------------------------------|
| 4435.492286                                          | 0.999474053                             | 15981.35924                  | 0.191800987                   | 0.109955497                   |
| 4003.650602                                          | 1                                       | 14806.58227                  | 0.227404932                   | 0.143000633                   |
| 1546.464698                                          | 1                                       | 5265.395627                  | 0.22470814                    | 0.140985583                   |
| 1113.513619                                          | 1                                       | 3735.546358                  | 0.269205942                   | 0.183053011                   |
| 1273.48824                                           | 1                                       | 4348.674757                  | 0.263932463                   | 0.17410772                    |
| 2499.827051                                          | 1                                       | 9034.456258                  | 0.19906137                    | 0.114353403                   |
| 3706.139028                                          | 0.996231156                             | 12590.66435                  | 0.207110559                   | 0.126310643                   |
| 1739.128484                                          | 0.99934669                              | 5962.013179                  | 0.304939436                   | 0.221162439                   |
| 1615.285653                                          | 0.999675886                             | 5536.053381                  | 0.268181936                   | 0.179753029                   |
| 501.9555985                                          | 1                                       | 1501.970752                  | 0.300969437                   | 0.211198882                   |
| 1628.023952                                          | 1                                       | 5047.769283                  | 0.256442806                   | 0.166078285                   |
| 1391.378649                                          | 0.997497915                             | 4749.320188                  | 0.267196605                   | 0.180029314                   |
| 639.7560976                                          | 1                                       | 2109.328557                  | 0.393148768                   | 0.316692147                   |
| 2121.721729                                          | 1                                       | 7277.550419                  | 0.256393064                   | 0.170846546                   |
| 1010.667436                                          | 1                                       | 3373.758367                  | 0.310382393                   | 0.223237273                   |
| 4726.464147                                          | 1                                       | 15522.88562                  | 0.23024646                    | 0.149333986                   |
| 1213.740651                                          | 1                                       | 4108.165679                  | 0.19581518                    | 0.109051418                   |
| 1403.882813                                          | 1                                       | 4798.240168                  | 0.326105335                   | 0.24365232                    |
| 476.883427                                           | 1                                       | 1476.562949                  | 0.259136379                   | 0.168330174                   |
| 964.2114428                                          | 0.999689055                             | 3174.870494                  | 0.287331081                   | 0.195831004                   |
| 915.6214642                                          | 0.99937604                              | 2982.615399                  | 0.336973135                   | 0.251945011                   |
| 1125.747423                                          | 1                                       | 3839.177321                  | 0.26057938                    | 0.167759949                   |
| 935.6294227                                          | 1                                       | 2984.9067                    | 0.271307509                   | 0.181639972                   |
| 2069.078594                                          | 0.999520767                             | 7195.279591                  | 0.242394652                   | 0.153403925                   |
| 328.215812                                           | 1                                       | 946.4883034                  | 0.348192355                   | 0.259266695                   |
| 2524.579281                                          | 1                                       | 8832.941095                  | 0.235939805                   | 0.14822819                    |
| 5683.97813                                           | 1                                       | 20698.86064                  | 0.17248818                    | 0.094707469                   |
| 942.8807947                                          | 1                                       | 3119.897946                  | 0.307444202                   | 0.22184574                    |
| 2489.70438                                           | 1                                       | 8828.560124                  | 0.220039678                   | 0.134704998                   |
| 1561.517939                                          | 1                                       | 5553.324362                  | 0.25860555                    | 0.169338041                   |
| 2030.334993                                          | 1                                       | 7107.671865                  | 0.310561082                   | 0.227612739                   |
| 4481.883901                                          | 0.998839009                             | 16712.38466                  | 0.213024383                   | 0.128984443                   |
| 9879.200957                                          | 0.998695085                             | 35122.59314                  | 0.174401267                   | 0.094957485                   |
| 4283.495189                                          | 1                                       | 14625.42322                  | 0.192535579                   | 0.110817676                   |
| 1405.93225                                           | 0.997919968                             | 4696.345591                  | 0.24527744                    | 0.158087268                   |
| 912.6944206                                          | 0.998712446                             | 2863.948551                  | 0.339267957                   | 0.257217605                   |
| 1345.45503                                           | 0.999500333                             | 4610.087303                  | 0.316606086                   | 0.230510003                   |
| 6512.032448                                          | 0.9953294                               | 22575.03697                  | 0.226856181                   | 0.148116578                   |
| 2037.64831                                           | 1                                       | 7251.796266                  | 0.20066914                    | 0.115160156                   |
| 8331.346546                                          | 0.999335695                             | 29370.75926                  | 0.215421082                   | 0.131324086                   |
| 1426.045879                                          | 1                                       | 4872.62341                   | 0.273447694                   | 0.186083828                   |
| 774.8808602                                          | 0.998709677                             | 2434.351216                  | 0.229696513                   | 0.141298219                   |
| 1589.708556                                          | 0.99959893                              | 5218.471093                  | 0.26655903                    | 0.18036067                    |
| 6147.896589                                          | 0.999593936                             | 21846.78037                  | 0.161709199                   | 0.083577106                   |
| 8545.691463                                          | 1                                       | 34097.71078                  | 0.204478728                   | 0.122676067                   |
| 4515.119714                                          | 1                                       | 14844.38461                  | 0.229645898                   | 0.143184956                   |
| 3291.611132                                          | 0.999714068                             | 11822.41208                  | 0.240955919                   | 0.154511477                   |
| 408.4155844                                          | 1                                       | 1269.013976                  | 0.298152876                   | 0.206747524                   |
| 644.2463768                                          | 1                                       | 1978.772181                  | 0.253559445                   | 0.166290267                   |
| 315.4852941                                          | 0.998621324                             | 931.2503744                  | 0.344148437                   | 0.255753538                   |
| 4796.647303                                          | 0.999555424                             | 18205.63835                  | 0.195650068                   | 0.115293082                   |
| 3573.332601                                          | 0.999670475                             | 12944.60891                  | 0.198137631                   | 0.112248515                   |
| 765.271719                                           | 0.99965342                              | 2504.939533                  | 0.280295048                   | 0.189514916                   |
| 2260.65894                                           | 1                                       | 8049.872532                  | 0.245881986                   | 0.159260114                   |
| 1051.198856                                          | 1                                       | 3469.629881                  | 0.266845301                   | 0.178292849                   |
| 1191.836106                                          | 1                                       | 4147.88137                   | 0.224982981                   | 0.136329117                   |
| 4877.393731                                          | 0.997419725                             | 16750.77612                  | 0.207311378                   | 0.121867451                   |
| 3775.714536                                          | 1                                       | 13807.99902                  | 0.19055185                    | 0.109889704                   |
| 1647.065302                                          | 1                                       | 5485.176699                  | 0.21236941                    | 0.126957784                   |
| 2114.452644                                          | 0.997888598                             | 7136.410418                  | 0.253764252                   | 0.170962888                   |
| 2397.333333                                          | 0.99809524                              | 8326.656998                  | 0.176898014                   | 0.094901208                   |
| 745.3674603                                          | 1                                       | 2428.804661                  | 0.292508421                   | 0.20498037                    |
| 3921.517507                                          | 0.996216617                             | 12948.52386                  | 0.237154974                   | 0.149082991                   |
| 3633.812439                                          | 0.991318423                             | 12547.76394                  | 0.191102801                   | 0.107357329                   |
| 437.5434174                                          | 1                                       | 1214.913098                  | 0.317191039                   | 0.228163092                   |
| 1879.896217                                          | 0.997315951                             | 6424.249548                  | 0.265728201                   | 0.179899403                   |
| 2133.862722                                          | 1                                       | 7395.050866                  | 0.202150999                   | 0.117429106                   |
| 6320.548072                                          | 0.994948908                             | 21245.54955                  | 0.182668717                   | 0.101586305                   |
| 2130.182383                                          | 1                                       | 7572.804865                  | 0.237134199                   | 0.147976785                   |
| 1561.107184                                          | 1                                       | 5139.853386                  | 0.228560857                   | 0.140733938                   |
| 1257.706629                                          | 1                                       | 4166.225657                  | 0.249354474                   | 0.165048668                   |
| 2170.56902                                           | 0.998235294                             | 7601.809868                  | 0.229915651                   | 0.143733815                   |
| 945.3023483                                          | 1                                       | 3176.920285                  | 0.304902474                   | 0.21879946                    |
| 3136.155017                                          | 0.999480969                             | 11334.057                    | 0.208597097                   | 0.121368055                   |
| 3019.506233                                          | 1                                       | 8189.487825                  | 0.233693524                   | 0.150468329                   |
| 4403.190578                                          | 1                                       | 16190.84444                  | 0.180208019                   | 0.099255369                   |
| 4861.561724                                          | 1                                       | 17988.31047                  | 0.212560581                   | 0.128025648                   |
| 296.4195402                                          | 1                                       | 822.3951022                  | 0.350830255                   | 0.263589165                   |
| 1394.944734                                          | 1                                       | 4883.57662                   | 0.247750701                   | 0.158424912                   |
| 4020.819083                                          | 1                                       | 14730.37041                  | 0.189670461                   | 0.104990031                   |
| 4361.677539                                          | 1                                       | 15738.53118                  | 0.193613175                   | 0.112225632                   |
| 1575.089828                                          | 1                                       | 5438.937419                  | 0.328475764                   | 0.247098067                   |
| 989.2932166                                          | 0.998905908                             | 3172.822103                  | 0.330337094                   | 0.247473832                   |
| 774.3204082                                          | 1                                       | 2440.272767                  | 0.280673653                   | 0.189240991                   |
| 6820.914485                                          | 0.9991274                               | 25759.42907                  | 0.176637384                   | 0.096642549                   |
| 546.8313609                                          | 1                                       | 1491.792259                  | 0.483944481                   | 0.427181235                   |
| 3803.243259                                          | 0.999560375                             | 13575.42901                  | 0.17189319                    | 0.092910505                   |
| 1214.494729                                          | 1                                       | 4065.68414                   | 0.28883827                    | 0.201420935                   |
| 997.289172                                           | 1                                       | 3237.855114                  | 0.264823378                   | 0.176188681                   |
| 641.7058824                                          | 1                                       | 2116.43054                   | 0.381190346                   | 0.299178619                   |
| 1808.711538                                          | 0.998397436                             | 6237.437233                  | 0.363936761                   | 0.288553846                   |
| 2645.215385                                          | 0.999112426                             | 9403.379612                  | 0.176760663                   | 0.095995379                   |
| 3562.377014                                          | 0.996579507                             | 12866.58285                  | 0.210412805                   | 0.124778356                   |
| 4442.894101                                          | 1                                       | 16637.43876                  | 0.198831422                   | 0.116900945                   |
| 1027.68626                                           | 0.999427481                             | 3427.197234                  | 0.228018859                   | 0.138441846                   |
| 2737.962506                                          | 0.99925999                              | 9442.93358                   | 0.232728809                   | 0.147856193                   |
| 922.0513775                                          | 1                                       | 3075.537921                  | 0.299959698                   | 0.211335642                   |
| 1424.686654                                          | 1                                       | 4777.438494                  | 0.273521613                   | 0.190219781                   |
| 443.7529762                                          | 1                                       | 1372.07874                   | 0.341299271                   | 0.255719244                   |
| 7369.604201                                          | 0.997305141                             | 26236.42824                  | 0.213533553                   | 0.131652988                   |









| wavelet.LLH_firstorder_Uniformity | wavelet.LLH_firstorder_MeanAbsoluteDeviation | wavelet.LLH_firstorder_Energy | wavelet.LLH_firstorder_RobustMeanAbsoluteDeviation | wavelet.LLH_firstorder_Median |
|-----------------------------------|----------------------------------------------|-------------------------------|----------------------------------------------------|-------------------------------|
| 0.026268942                       | 251.8684031                                  | 277473383.6                   | 143.7236245                                        | 38.3936205                    |
| 0.029508422                       | 236.0277877                                  | 106143329.3                   | 138.8919359                                        | 58.16988953                   |
| 0.026147863                       | 235.7924789                                  | 142700251.8                   | 158.061187                                         | 3.985641961                   |
| 0.058463389                       | 112.5797242                                  | 24959538.57                   | 64.54464286                                        | 20.11524516                   |
| 0.049402364                       | 123.4439228                                  | 72396175.27                   | 76.65697443                                        | 48.35716944                   |
| 0.031033058                       | 197.9534656                                  | 47869394.46                   | 126.7664549                                        | 41.84167364                   |
| 0.016773042                       | 368.6735802                                  | 1314685502                    | 249.6148196                                        | 61.52761636                   |
| 0.063918959                       | 110.0049071                                  | 143691130.4                   | 59.28811516                                        | 25.25470899                   |
| 0.051565471                       | 119.5724574                                  | 130394652.5                   | 72.27613268                                        | 29.9065852                    |
| 0.060174872                       | 100.6458357                                  | 22041414.72                   | 62.87013134                                        | 44.10855499                   |
| 0.029064266                       | 205.4203122                                  | 557673271                     | 134.4126929                                        | -550.4654039                  |
| 0.051797046                       | 123.5348192                                  | 72142117.72                   | 71.85357383                                        | 30.20926879                   |
| 0.105697611                       | 64.85609074                                  | 19187895.4                    | 34.27918321                                        | 12.55750958                   |
| 0.047421567                       | 150.2797656                                  | 86089989.42                   | 84.70690781                                        | 33.25760992                   |
| 0.074559683                       | 91.82854553                                  | 39598773.17                   | 49.31422629                                        | 17.14797075                   |
| 0.015683018                       | 478.7892196                                  | 4666062175                    | 302.9120158                                        | -895.4736321                  |
| 0.027775673                       | 208.6845504                                  | 83461559.31                   | 147.9226738                                        | 56.90679987                   |
| 0.070591184                       | 106.550101                                   | 33493359.84                   | 55.92241303                                        | 17.63628804                   |
| 0.046937211                       | 125.2624517                                  | 35826289.75                   | 83.15723795                                        | 38.92414922                   |
| 0.061154251                       | 99.99520064                                  | 107286819.2                   | 60.94474679                                        | 25.8548846                    |
| 0.070756698                       | 91.76505981                                  | 56824341.92                   | 54.05065976                                        | 34.11725532                   |
| 0.051605295                       | 117.0289337                                  | 28962289.49                   | 73.64018804                                        | 38.84307637                   |
| 0.052097321                       | 117.4959614                                  | 27608685.74                   | 72.74382081                                        | 34.22897948                   |
| 0.036936412                       | 163.4497874                                  | 138090463.7                   | 102.7496919                                        | 56.91149102                   |
| 0.085683749                       | 70.37177894                                  | 12348776.91                   | 43.63874603                                        | 19.07663387                   |
| 0.038545045                       | 165.2876125                                  | 134273553.9                   | 98.41728054                                        | 59.38334359                   |
| 0.011958433                       | 517.8515056                                  | 1254814816                    | 382.7043774                                        | 55.48409894                   |
| 0.065770798                       | 99.24580096                                  | 57754322.92                   | 56.25599491                                        | 17.06722635                   |
| 0.035789179                       | 182.1134798                                  | 30407900.33                   | 111.684511                                         | 48.89733965                   |
| 0.041285487                       | 143.829889                                   | 84496837.99                   | 93.29504049                                        | 73.24015831                   |
| 0.065011632                       | 110.9466404                                  | 147557197.3                   | 57.29195892                                        | 25.00653475                   |
| 0.019130944                       | 382.5769437                                  | 564087825.9                   | 227.2998616                                        | 94.29161719                   |
| 0.009009498                       | 748.9842552                                  | 2383397012                    | 590.8504653                                        | -33.62466025                  |
| 0.012351652                       | 568.9923253                                  | 1879164141                    | 416.3762327                                        | -712.0732488                  |
| 0.040521951                       | 149.3646413                                  | 189829393.5                   | 92.77257729                                        | 45.85388948                   |
| 0.077593832                       | 92.21826385                                  | 59387330.27                   | 49.4184816                                         | 19.81413686                   |
| 0.071838106                       | 93.21862596                                  | 74906258.31                   | 51.53808116                                        | 20.30605917                   |
| 0.01053994                        | 642.6830263                                  | 3956041774                    | 475.7345911                                        | -567.7843553                  |
| 0.026485558                       | 223.4796225                                  | 102349074.1                   | 151.268887                                         | 41.0444272                    |
| 0.01280592                        | 498.5638942                                  | 4987033484                    | 325.2763311                                        | -531.4973387                  |
| 0.053314719                       | 120.1525032                                  | 76815915.6                    | 70.47981345                                        | 24.50300464                   |
| 0.042547428                       | 135.4084051                                  | 117724793                     | 90.93273756                                        | 12.25846704                   |
| 0.051996982                       | 128.8542946                                  | 132406332.7                   | 72.99231341                                        | 23.77182007                   |
| 0.011132536                       | 545.605156                                   | 1446012869                    | 417.9672119                                        | -439.1545036                  |
| 0.015730271                       | 558.5393115                                  | 768518022.2                   | 402.2846803                                        | 601.68103                     |
| 0.017719251                       | 537.1147933                                  | 1184889935                    | 403.9322239                                        | -417.1336546                  |
| 0.039725072                       | 157.850873                                   | 233707414.9                   | 95.8055262                                         | 49.18503439                   |
| 0.074149697                       | 79.91879188                                  | 9723990.571                   | 52.52463923                                        | 13.56585622                   |
| 0.053746128                       | 115.1383644                                  | 20983595.26                   | 72.15153366                                        | 16.44429983                   |
| 0.087120549                       | 69.05742136                                  | 12452740.27                   | 42.88817291                                        | 18.07169665                   |
| 0.015370102                       | 440.4865191                                  | 1143171598                    | 316.8734323                                        | 480.9404515                   |
| 0.02940598                        | 197.2138228                                  | 237752325.2                   | 130.4083691                                        | 71.4377801                    |
| 0.056106883                       | 105.9898797                                  | 93347209.5                    | 67.14591513                                        | 20.1631147                    |
| 0.036292599                       | 183.0462404                                  | 79815935.12                   | 106.2028052                                        | 73.29053215                   |
| 0.05090169                        | 120.047357                                   | 37704040.49                   | 74.5141709                                         | 44.66430703                   |
| 0.035516108                       | 167.1125752                                  | 100283309.3                   | 109.2442943                                        | 75.36542519                   |
| 0.012647762                       | 531.4731108                                  | 1870240693                    | 399.3911145                                        | -413.9588314                  |
| 0.017097845                       | 358.9847063                                  | 694445466.8                   | 250.5486512                                        | 55.04070655                   |
| 0.033479828                       | 187.3726139                                  | 108810617.9                   | 114.3600751                                        | 30.63129515                   |
| 0.044473259                       | 150.6255713                                  | 427532285.9                   | 90.54390012                                        | 29.12320165                   |
| 0.020040042                       | 291.926595                                   | 225960932.6                   | 212.365566                                         | 43.89859678                   |
| 0.061668701                       | 107.1123263                                  | 64146662.56                   | 60.86198936                                        | 21.85362033                   |
| 0.022070766                       | 278.8672334                                  | 3630749193                    | 190.7249827                                        | -694.9339195                  |
| 0.014954346                       | 402.3281307                                  | 1947675206                    | 280.7565417                                        | 84.96101889                   |
| 0.074318218                       | 90.27732601                                  | 13909745.83                   | 52.11287231                                        | 19.12587877                   |
| 0.047096877                       | 141.4723237                                  | 166271793                     | 80.20752698                                        | 36.43970875                   |
| 0.025918364                       | 234.9636501                                  | 125706073.7                   | 150.8548605                                        | 10.42917852                   |
| 0.010075699                       | 596.2649131                                  | 5409640595                    | 438.140991                                         | -673.4325086                  |
| 0.041998663                       | 142.9867685                                  | 225845121.1                   | 89.51442069                                        | 31.02552747                   |
| 0.027739794                       | 215.6034213                                  | 239911777.7                   | 139.9284859                                        | 46.40120588                   |
| 0.043741233                       | 149.2502867                                  | 57392180.68                   | 87.90734924                                        | 25.90373241                   |
| 0.030828348                       | 203.7900475                                  | 360703598.6                   | 126.4656153                                        | 83.32410883                   |
| 0.066108493                       | 98.92597207                                  | 47568344.77                   | 56.29112488                                        | 20.89056227                   |
| 0.025187333                       | 234.8173736                                  | 297685708.3                   | 153.1233235                                        | 201.086599                    |
| 0.018906045                       | 478.995356                                   | 2374580792                    | 329.6625488                                        | -863.5388019                  |
| 0.012767607                       | 518.9479383                                  | 533272231.6                   | 405.0739847                                        | -244.9694432                  |
| 0.023597342                       | 295.0470158                                  | 379787186.4                   | 177.318131                                         | 64.56494065                   |
| 0.092612044                       | 68.70061454                                  | 9396824.498                   | 40.25429012                                        | 10.93981084                   |
| 0.041953787                       | 148.3720324                                  | 70432515.22                   | 92.4987996                                         | 48.68160733                   |
| 0.015140961                       | 383.7691398                                  | 572925187.8                   | 278.7417002                                        | -160.1171401                  |
| 0.02616376                        | 254.289281                                   | 264180541.1                   | 145.009082                                         | 32.98468716                   |
| 0.068283566                       | 104.6640785                                  | 45689735.8                    | 55.14170714                                        | 14.70015703                   |
| 0.072088993                       | 98.74048766                                  | 74885443.84                   | 51.67497579                                        | 11.19057189                   |
| 0.053607473                       | 110.8388806                                  | 71874056.49                   | 70.78116822                                        | 35.42715491                   |
| 0.011869946                       | 645.3213077                                  | 1443311506                    | 501.0158799                                        | 382.9086409                   |
| 0.139599765                       | 68.1706198                                   | 18008097.01                   | 34.66601655                                        | 12.57769203                   |
| 0.017166163                       | 343.0018217                                  | 451630993.9                   | 239.847427                                         | 72.91757129                   |
| 0.053139935                       | 123.0299046                                  | 90431696.11                   | 70.19253126                                        | 38.59996614                   |
| 0.051620495                       | 121.7682786                                  | 44573456.79                   | 73.02109013                                        | 37.69813571                   |
| 0.097904344                       | 63.32345994                                  | 16911394.62                   | 37.59455437                                        | 14.87933835                   |
| 0.088905303                       | 96.22123906                                  | 32431957.11                   | 45.55300376                                        | 15.14920629                   |
| 0.013681184                       | 433.0423428                                  | 660908519.7                   | 320.5217734                                        | -115.4666389                  |
| 0.024211338                       | 268.8282065                                  | 688519080.7                   | 164.3428352                                        | 64.10021124                   |
| 0.015302847                       | 411.234503                                   | 801377049.2                   | 307.8930046                                        | 101.6103384                   |
| 0.037238626                       | 154.8529535                                  | 172231426.5                   | 105.280896                                         | 34.68788071                   |
| 0.034770032                       | 193.4422827                                  | 270697746.6                   | 111.760194                                         | 46.54681823                   |
| 0.062807346                       | 95.14883335                                  | 47441073.92                   | 59.72473688                                        | 13.85535728                   |
| 0.06282105                        | 114.0157417                                  | 32141761.07                   | 59.63108257                                        | 10.31285855                   |
| 0.079030301                       | 77.72067576                                  | 9592915.853                   | 47.92174175                                        | 12.4852392                    |
| 0.012431478                       | 626.5237974                                  | 3061025643                    | 508.2545866                                        | -391.612623                   |







| wavelet.LLH_glrIm_ShortRunLowGrayLevelEmphasis | wavelet.LLH_glrIm_GrayLevelVariance | wavelet.LLH_glrIm_LowGrayLevelRunEmphasis | wavelet.LLH_glrIm_GrayLevelNonUniformityNormalized | wavelet.LLH_glrIm_RunVariance |
|------------------------------------------------|-------------------------------------|-------------------------------------------|----------------------------------------------------|-------------------------------|
| 0.001098339                                    | 212.9288872                         | 0.001109563                               | 0.02580224                                         | 0.033376918                   |
| 0.001500245                                    | 183.4877947                         | 0.001508245                               | 0.028750847                                        | 0.044614304                   |
| 0.001997155                                    | 150.0783015                         | 0.002025265                               | 0.025704671                                        | 0.044421487                   |
| 0.002168124                                    | 42.09583337                         | 0.002204889                               | 0.056450689                                        | 0.059711093                   |
| 0.001457936                                    | 47.2700208                          | 0.001490636                               | 0.048444736                                        | 0.057324168                   |
| 0.002467784                                    | 116.0386792                         | 0.002477067                               | 0.030613236                                        | 0.030694111                   |
| 0.000783382                                    | 368.1669196                         | 0.000797291                               | 0.016326417                                        | 0.044162844                   |
| 0.000895337                                    | 45.87726743                         | 0.000927036                               | 0.060381701                                        | 0.086288449                   |
| 0.000983869                                    | 46.05928213                         | 0.001011233                               | 0.050104708                                        | 0.062231863                   |
| 0.006513474                                    | 30.8935746                          | 0.006635899                               | 0.058374836                                        | 0.067219602                   |
| 0.002410625                                    | 117.6016575                         | 0.002445246                               | 0.028747249                                        | 0.050027586                   |
| 0.001333743                                    | 50.52883326                         | 0.001363633                               | 0.050284953                                        | 0.058770869                   |
| 0.002488855                                    | 17.55554325                         | 0.002617522                               | 0.098322242                                        | 0.136996507                   |
| 0.001223444                                    | 78.74293486                         | 0.001243806                               | 0.045573534                                        | 0.059481504                   |
| 0.001986784                                    | 33.10541216                         | 0.002040983                               | 0.071381177                                        | 0.077705457                   |
| 0.001010475                                    | 665.736627                          | 0.001042812                               | 0.015259268                                        | 0.055099433                   |
| 0.003818569                                    | 109.1522547                         | 0.00384078                                | 0.027613292                                        | 0.03056006                    |
| 0.001797128                                    | 44.69794753                         | 0.001840838                               | 0.065954971                                        | 0.093333844                   |
| 0.005562931                                    | 43.03335415                         | 0.005569905                               | 0.046286514                                        | 0.051311037                   |
| 0.001761009                                    | 33.31001029                         | 0.001810951                               | 0.059608386                                        | 0.067285512                   |
| 0.001590294                                    | 27.80400769                         | 0.001660413                               | 0.067610961                                        | 0.096636515                   |
| 0.002316319                                    | 41.99897544                         | 0.002348778                               | 0.050694751                                        | 0.050695209                   |
| 0.002527323                                    | 42.8136676                          | 0.002577552                               | 0.050738917                                        | 0.057907257                   |
| 0.001021401                                    | 80.98188297                         | 0.001037947                               | 0.036383454                                        | 0.046942918                   |
| 0.00480818                                     | 15.49521218                         | 0.005010107                               | 0.082830008                                        | 0.087331396                   |
| 0.000944293                                    | 89.21139068                         | 0.000957632                               | 0.037645868                                        | 0.048247571                   |
| 0.000936843                                    | 620.2903556                         | 0.00094433                                | 0.011863267                                        | 0.030545376                   |
| 0.001706771                                    | 34.70154274                         | 0.00176462                                | 0.062802237                                        | 0.082173227                   |
| 0.003503713                                    | 107.4875993                         | 0.00351622                                | 0.035203943                                        | 0.042832515                   |
| 0.001364368                                    | 60.4721419                          | 0.001389135                               | 0.040657595                                        | 0.05404431                    |
| 0.000860081                                    | 51.84322575                         | 0.000889063                               | 0.061377747                                        | 0.095308866                   |
| 0.001355712                                    | 439.7712422                         | 0.001381411                               | 0.0187112431                                       | 0.043761042                   |
| 0.000609858                                    | 1180.466055                         | 0.000614365                               | 0.008965086                                        | 0.082720092                   |
| 0.001388327                                    | 774.0019347                         | 0.001405638                               | 0.012236094                                        | 0.03666509                    |
| 0.001168001                                    | 67.04488666                         | 0.001194958                               | 0.039579988                                        | 0.049450902                   |
| 0.00172811                                     | 31.77137064                         | 0.001806403                               | 0.072499823                                        | 0.106978092                   |
| 0.001356885                                    | 33.69821036                         | 0.001404379                               | 0.068525405                                        | 0.090458075                   |
| 0.000675471                                    | 953.421882                          | 0.000690312                               | 0.010362103                                        | 0.05556434                    |
| 0.001682274                                    | 133.853282                          | 0.001698878                               | 0.026296766                                        | 0.034892351                   |
| 0.000336719                                    | 700.0383143                         | 0.00034238                                | 0.012613278                                        | 0.043363968                   |
| 0.001243188                                    | 48.73021346                         | 0.001274472                               | 0.051543015                                        | 0.068763702                   |
| 0.002495816                                    | 49.46744611                         | 0.002542664                               | 0.042079527                                        | 0.041863637                   |
| 0.001117954                                    | 58.68229605                         | 0.00114715                                | 0.050090861                                        | 0.065386025                   |
| 0.000887437                                    | 663.2222605                         | 0.000894032                               | 0.01112404                                         | 0.024232066                   |
| 0.001053487                                    | 757.9371613                         | 0.001057849                               | 0.015414096                                        | 0.042381184                   |
| 0.000822574                                    | 647.9799832                         | 0.000836368                               | 0.017444361                                        | 0.042203401                   |
| 0.000565754                                    | 79.62961378                         | 0.000576591                               | 0.038597992                                        | 0.052714031                   |
| 0.004360922                                    | 18.40200975                         | 0.004476624                               | 0.072406333                                        | 0.069539141                   |
| 0.00360663                                     | 39.76734715                         | 0.003672049                               | 0.052393421                                        | 0.054808026                   |
| 0.005342317                                    | 15.09122187                         | 0.005540642                               | 0.08421317                                         | 0.092418601                   |
| 0.000905498                                    | 476.3545362                         | 0.000912831                               | 0.015173886                                        | 0.036890961                   |
| 0.000695173                                    | 107.6388385                         | 0.000702024                               | 0.029174823                                        | 0.033172349                   |
| 0.002113767                                    | 33.58800789                         | 0.002189849                               | 0.054795633                                        | 0.064506954                   |
| 0.001967303                                    | 110.8129864                         | 0.001997503                               | 0.035437228                                        | 0.050889646                   |
| 0.002359992                                    | 45.06298511                         | 0.002390983                               | 0.049674045                                        | 0.057112781                   |
| 0.001896944                                    | 77.47349101                         | 0.001925992                               | 0.035170951                                        | 0.039738738                   |
| 0.000702545                                    | 639.9637187                         | 0.000714379                               | 0.012551794                                        | 0.037390017                   |
| 0.000880036                                    | 323.6162239                         | 0.000889449                               | 0.016906299                                        | 0.035302435                   |
| 0.002799694                                    | 107.8210461                         | 0.002858876                               | 0.032764561                                        | 0.041916811                   |
| 0.000754865                                    | 73.56299472                         | 0.000777965                               | 0.042348597                                        | 0.070153361                   |
| 0.001453104                                    | 205.1651287                         | 0.001465474                               | 0.020000334                                        | 0.02728565                    |
| 0.002621484                                    | 38.97304753                         | 0.002713636                               | 0.059106071                                        | 0.072882956                   |
| 0.000603611                                    | 222.1281495                         | 0.000614831                               | 0.021934007                                        | 0.048837766                   |
| 0.001210374                                    | 408.6249725                         | 0.001232399                               | 0.014899793                                        | 0.032833286                   |
| 0.004437103                                    | 27.76065296                         | 0.004578983                               | 0.071924093                                        | 0.073266055                   |
| 0.000971465                                    | 68.79653607                         | 0.000995855                               | 0.04529887                                         | 0.066096926                   |
| 0.001825751                                    | 155.5596875                         | 0.001846449                               | 0.025627462                                        | 0.036160509                   |
| 0.000850168                                    | 841.0322691                         | 0.000869625                               | 0.010057902                                        | 0.030863055                   |
| 0.000709272                                    | 61.93977704                         | 0.000723506                               | 0.04136779                                         | 0.042362474                   |
| 0.001712781                                    | 129.9500818                         | 0.001743636                               | 0.027323099                                        | 0.043210551                   |
| 0.001993593                                    | 72.04216933                         | 0.002031405                               | 0.041986058                                        | 0.062365701                   |
| 0.000972138                                    | 124.7903662                         | 0.0009911102                              | 0.030151517                                        | 0.047435936                   |
| 0.001767044                                    | 34.54264801                         | 0.001822805                               | 0.063452914                                        | 0.08108957                    |
| 0.000915472                                    | 155.4040362                         | 0.000925357                               | 0.025008369                                        | 0.036164823                   |
| 0.002231077                                    | 579.7066804                         | 0.002297943                               | 0.018366746                                        | 0.053424372                   |
| 0.00176693                                     | 585.0564908                         | 0.001775936                               | 0.012716531                                        | 0.030786953                   |
| 0.000776295                                    | 257.6351814                         | 0.000783172                               | 0.023277062                                        | 0.038715917                   |
| 0.006091572                                    | 16.16589719                         | 0.006340376                               | 0.088499209                                        | 0.09943523                    |
| 0.001592488                                    | 66.11098525                         | 0.001618536                               | 0.041081168                                        | 0.048079049                   |
| 0.001375934                                    | 352.0036431                         | 0.001383663                               | 0.015108856                                        | 0.030393532                   |
| 0.001157653                                    | 216.4190237                         | 0.00116918                                | 0.025712062                                        | 0.03305848                    |
| 0.001322387                                    | 42.95503453                         | 0.001362425                               | 0.063409087                                        | 0.102050989                   |
| 0.001690096                                    | 38.42432243                         | 0.001756651                               | 0.06789481                                         | 0.099890635                   |
| 0.002623923                                    | 36.36851654                         | 0.002727767                               | 0.052551085                                        | 0.063575451                   |
| 0.001493907                                    | 902.7478912                         | 0.001501047                               | 0.011764552                                        | 0.029309885                   |
| 0.003864586                                    | 18.84451413                         | 0.00421932                                | 0.120712799                                        | 0.254777898                   |
| 0.001324211                                    | 300.9303725                         | 0.001331622                               | 0.017025779                                        | 0.027952056                   |
| 0.001601021                                    | 52.15464833                         | 0.001640072                               | 0.051346047                                        | 0.068450707                   |
| 0.002432061                                    | 48.5420418                          | 0.00247921                                | 0.05044582                                         | 0.056482119                   |
| 0.002241807                                    | 13.94164545                         | 0.002348826                               | 0.093778941                                        | 0.113393756                   |
| 0.001767227                                    | 42.37891457                         | 0.001810358                               | 0.079466579                                        | 0.136724944                   |
| 0.001709978                                    | 433.7043633                         | 0.001735881                               | 0.013682711                                        | 0.027619781                   |
| 0.000664179                                    | 214.7300306                         | 0.000673605                               | 0.023837261                                        | 0.038910874                   |
| 0.00098848                                     | 388.6956422                         | 0.001011605                               | 0.015217824                                        | 0.038004948                   |
| 0.002388606                                    | 63.53955642                         | 0.00242353                                | 0.036914682                                        | 0.041513725                   |
| 0.000827428                                    | 125.0818567                         | 0.000842377                               | 0.033678697                                        | 0.049462499                   |
| 0.001581977                                    | 27.7348324                          | 0.001633499                               | 0.061211987                                        | 0.071166598                   |
| 0.001980409                                    | 51.26081171                         | 0.002013421                               | 0.059947655                                        | 0.071855562                   |
| 0.005439988                                    | 19.26269202                         | 0.005673291                               | 0.076285878                                        | 0.099466365                   |
| 0.000507472                                    | 803.1559724                         | 0.000514771                               | 0.012288988                                        | 0.044824797                   |

| wavelet.LLH_glrIm_GrayLevelNonUniformity | wavelet.LLH_glrIm_LongRunEmphasis | wavelet.LLH_glrIm_ShortRunHighGrayLevelEmphasis | wavelet.LLH_glrIm_RunLengthNonUniformity | wavelet.LLH_glrIm_ShortRunEmphasis |
|------------------------------------------|-----------------------------------|-------------------------------------------------|------------------------------------------|------------------------------------|
| 53.02799119                              | 1.099957434                       | 4328.485446                                     | 1929.266219                              | 0.976019151                        |
| 25.83576172                              | 1.128109086                       | 3914.355813                                     | 833.1229077                              | 0.971053344                        |
| 37.85773376                              | 1.130087928                       | 1506.031341                                     | 1360.945058                              | 0.969897144                        |
| 52.33737334                              | 1.171621865                       | 1074.014159                                     | 839.1699518                              | 0.961769314                        |
| 108.9068719                              | 1.167515954                       | 1235.313362                                     | 2033.023731                              | 0.961708495                        |
| 19.62338784                              | 1.091145764                       | 2455.682466                                     | 605.3421517                              | 0.978291787                        |
| 88.68218516                              | 1.126895064                       | 3468.1353                                       | 5034.33614                               | 0.971118741                        |
| 287.3343214                              | 1.240072611                       | 1623.857775                                     | 4169.78698                               | 0.949322955                        |
| 215.5437481                              | 1.179869548                       | 1551.848905                                     | 3870.51086                               | 0.959628837                        |
| 58.95974733                              | 1.195436694                       | 464.7638                                        | 901.036382                               | 0.956204378                        |
| 41.3897259                               | 1.147829368                       | 1495.122953                                     | 1315.847146                              | 0.965716815                        |
| 110.0249753                              | 1.169356411                       | 1333.966933                                     | 1980.981529                              | 0.962047719                        |
| 165.0012937                              | 1.38052389                        | 590.9735479                                     | 1378.326649                              | 0.923559267                        |
| 74.28810592                              | 1.170653995                       | 1991.904742                                     | 1477.172933                              | 0.962154723                        |
| 132.4141589                              | 1.223386985                       | 951.8306929                                     | 1631.904617                              | 0.9509024                          |
| 63.73500153                              | 1.153807202                       | 4297.392478                                     | 3826.016993                              | 0.966484146                        |
| 32.06317718                              | 1.088323868                       | 1200.174412                                     | 1100.635372                              | 0.979597236                        |
| 75.2360879                               | 1.264857097                       | 1309.855609                                     | 986.0993343                              | 0.943717094                        |
| 57.39183673                              | 1.148609866                       | 462.2585599                                     | 1136.54261                               | 0.966492609                        |
| 291.8836498                              | 1.195699591                       | 919.0591697                                     | 4365.732307                              | 0.956073255                        |
| 188.8504938                              | 1.270970291                       | 843.5629821                                     | 2408.572385                              | 0.943046481                        |
| 52.25357511                              | 1.147412375                       | 1087.412832                                     | 944.1318833                              | 0.966474589                        |
| 49.28020496                              | 1.170308475                       | 892.606968                                      | 876.9727006                              | 0.961030038                        |
| 92.31450255                              | 1.136402115                       | 2001.055                                        | 2339.192735                              | 0.968879577                        |
| 97.58395244                              | 1.256652618                       | 300.1148388                                     | 1015.696326                              | 0.943067104                        |
| 85.45171488                              | 1.138365442                       | 2455.550584                                     | 2091.479717                              | 0.968750353                        |
| 37.28921647                              | 1.088753371                       | 5065.082476                                     | 2977.018211                              | 0.979346664                        |
| 161.728385                               | 1.234355822                       | 894.957229                                      | 2256.497227                              | 0.949243817                        |
| 15.14141588                              | 1.123752245                       | 2394.258227                                     | 399.6232551                              | 0.971871056                        |
| 79.4809854                               | 1.158954506                       | 1528.580861                                     | 1776.543827                              | 0.963497543                        |
| 270.2625755                              | 1.265221491                       | 1915.280232                                     | 3813.564239                              | 0.944604443                        |
| 37.23971571                              | 1.125152645                       | 4501.364348                                     | 1847.484302                              | 0.971644294                        |
| 28.17156915                              | 1.085016107                       | 9616.662242                                     | 2979.569332                              | 0.979765393                        |
| 27.81977255                              | 1.105813572                       | 4056.455954                                     | 2133.593435                              | 0.975746776                        |
| 166.6928932                              | 1.143379229                       | 1344.127676                                     | 3864.163059                              | 0.967251526                        |
| 199.7495526                              | 1.294705791                       | 815.9046482                                     | 2354.678066                              | 0.939462444                        |
| 236.3678337                              | 1.257823634                       | 1265.878631                                     | 2992.562672                              | 0.944969123                        |
| 50.95472864                              | 1.157985806                       | 6037.032268                                     | 4488.331255                              | 0.965053074                        |
| 31.29577461                              | 1.10360128                        | 2046.813606                                     | 1115.837919                              | 0.975482412                        |
| 88.12416631                              | 1.126616287                       | 7804.36102                                      | 6469.394505                              | 0.970745663                        |
| 126.1510367                              | 1.194192914                       | 1369.410236                                     | 2195.136451                              | 0.958063792                        |
| 156.5239035                              | 1.123416977                       | 748.9899518                                     | 3449.999707                              | 0.971237813                        |
| 173.1120818                              | 1.184987904                       | 1495.602583                                     | 3113.156534                              | 0.95969297                         |
| 27.04610645                              | 1.071589585                       | 5932.346002                                     | 2324.107787                              | 0.982915141                        |
| 18.9722072                               | 1.121311527                       | 8721.20192                                      | 1145.505306                              | 0.972595353                        |
| 46.05658144                              | 1.123686892                       | 4138.094761                                     | 2448.33822                               | 0.971317003                        |
| 168.1685761                              | 1.149827562                       | 3176.288181                                     | 3991.911994                              | 0.96659696                         |
| 59.36000749                              | 1.200171701                       | 396.1140389                                     | 730.8436737                              | 0.955759304                        |
| 42.50159982                              | 1.1569179                         | 609.1316157                                     | 740.2921969                              | 0.964841016                        |
| 105.5244386                              | 1.260081487                       | 291.2266157                                     | 1087.472017                              | 0.945163398                        |
| 37.68572652                              | 1.107415055                       | 4927.580285                                     | 2327.090983                              | 0.975159287                        |
| 95.34373845                              | 1.097497329                       | 3507.710724                                     | 3076.269523                              | 0.97705232                         |
| 233.5723784                              | 1.186247693                       | 740.4859979                                     | 3824.041774                              | 0.958367203                        |
| 37.34252875                              | 1.149544248                       | 2175.267412                                     | 962.6513205                              | 0.965457269                        |
| 62.74412684                              | 1.166948951                       | 1017.078225                                     | 1143.538292                              | 0.962014346                        |
| 66.05657283                              | 1.118007236                       | 1188.374838                                     | 1744.944545                              | 0.972099578                        |
| 49.03533982                              | 1.109910631                       | 4574.958346                                     | 3650.814677                              | 0.97426784                         |
| 56.56158166                              | 1.104016922                       | 4774.766448                                     | 3136.712997                              | 0.975519009                        |
| 51.98056026                              | 1.121725542                       | 1581.46953                                      | 1474.293535                              | 0.972028273                        |
| 365.3038564                              | 1.191633246                       | 1978.933507                                     | 7765.198392                              | 0.959712202                        |
| 34.40993665                              | 1.08113299                        | 2354.757376                                     | 1634.434263                              | 0.980563077                        |
| 148.2650872                              | 1.207076225                       | 707.4665469                                     | 2228.962491                              | 0.954709558                        |
| 121.5703264                              | 1.140223728                       | 3648.02858                                      | 5100.368111                              | 0.968303361                        |
| 110.0823743                              | 1.097604257                       | 3468.136843                                     | 6948.083373                              | 0.976745549                        |
| 53.23389759                              | 1.215715798                       | 397.4294719                                     | 653.3303938                              | 0.951667561                        |
| 165.3229115                              | 1.187013807                       | 1766.130719                                     | 3278.711618                              | 0.959047636                        |
| 32.30074067                              | 1.107139891                       | 2103.57456                                      | 1179.289438                              | 0.974720675                        |
| 61.06770866                              | 1.090799757                       | 5828.577573                                     | 5738.112355                              | 0.978555175                        |
| 233.0114271                              | 1.124236359                       | 2075.469607                                     | 5221.83037                               | 0.971152847                        |
| 76.0880368                               | 1.126882828                       | 1495.769492                                     | 2577.497389                              | 0.970526851                        |
| 51.73003004                              | 1.175737921                       | 1206.086382                                     | 1114.150435                              | 0.961494461                        |
| 123.9839231                              | 1.136405819                       | 2081.940006                                     | 3790.310622                              | 0.969007687                        |
| 135.1186341                              | 1.22976526                        | 901.5000891                                     | 1873.732501                              | 0.950522183                        |
| 54.57660587                              | 1.107949949                       | 3094.399761                                     | 2039.055534                              | 0.974271536                        |
| 54.89326321                              | 1.151419731                       | 2516.162053                                     | 2736.907272                              | 0.966428097                        |
| 16.58678571                              | 1.090140653                       | 4357.390325                                     | 1234.553098                              | 0.978931644                        |
| 53.80190329                              | 1.113763888                       | 4774.278149                                     | 2154.934699                              | 0.973377872                        |
| 78.05279527                              | 1.282599312                       | 262.3084453                                     | 755.5327963                              | 0.940186602                        |
| 67.07358669                              | 1.141859226                       | 1360.947326                                     | 1497.069914                              | 0.966951866                        |
| 34.33194062                              | 1.090250526                       | 3989.848674                                     | 2146.858307                              | 0.978464824                        |
| 49.55344875                              | 1.098658926                       | 4283.009676                                     | 1811.084414                              | 0.976409816                        |
| 104.9829879                              | 1.286125395                       | 1473.371896                                     | 1417.650399                              | 0.940148936                        |
| 204.8482535                              | 1.275348087                       | 902.6441082                                     | 2599.715677                              | 0.942932757                        |
| 152.6019286                              | 1.184643063                       | 728.1952346                                     | 2605.910995                              | 0.958536169                        |
| 27.91678931                              | 1.086140022                       | 6958.959477                                     | 2250.072751                              | 0.979716814                        |
| 155.3440007                              | 1.680683461                       | 414.8918939                                     | 942.0961258                              | 0.87897539                         |
| 39.53631752                              | 1.083231561                       | 3754.34812                                      | 2203.521146                              | 0.980080498                        |
| 132.7311035                              | 1.19544496                        | 1164.999852                                     | 2311.039064                              | 0.956977952                        |
| 70.25672246                              | 1.162937039                       | 956.9107479                                     | 1265.850113                              | 0.963395757                        |
| 173.2866956                              | 1.319266002                       | 598.180469                                      | 1558.493688                              | 0.933856085                        |
| 93.60565151                              | 1.367002802                       | 1629.136947                                     | 978.9464386                              | 0.928495557                        |
| 31.74976143                              | 1.081748716                       | 2626.914852                                     | 2204.802109                              | 0.980552902                        |
| 119.1260918                              | 1.114841886                       | 3496.905037                                     | 4653.439202                              | 0.97297043                         |
| 48.49420372                              | 1.110800621                       | 4452.163962                                     | 2977.881098                              | 0.974253822                        |
| 154.5061587                              | 1.123127985                       | 1011.234915                                     | 3878.683946                              | 0.971046451                        |
| 110.2746993                              | 1.142707106                       | 2611.736579                                     | 3007.395673                              | 0.967597639                        |
| 162.1010387                              | 1.204175759                       | 883.6068776                                     | 2354.287341                              | 0.954907221                        |
| 59.1280505                               | 1.201709421                       | 1343.074684                                     | 882.1987137                              | 0.956908669                        |
| 58.5148929                               | 1.28632664                        | 416.1165032                                     | 655.0838015                              | 0.938472228                        |
| 68.16257497                              | 1.129139294                       | 6994.982824                                     | 5135.088376                              | 0.970611642                        |

| wavelet.LLH_glrIm_LongRunHighGrayLevelEmphasis | wavelet.LLH_glrIm_RunPercentage | wavelet.LLH_glrIm_LongRunLowGrayLevelEmphasis | wavelet.LLH_glrIm_RunEntropy | wavelet.LLH_glrIm_HighGrayLevelRunEmphasis |
|------------------------------------------------|---------------------------------|-----------------------------------------------|------------------------------|--------------------------------------------|
| 4880.606831                                    | 0.968462263                     | 0.001155431                                   | 5.898214809                  | 4435.529021                                |
| 4544.040098                                    | 0.961003702                     | 0.001543528                                   | 5.743047783                  | 4030.978276                                |
| 1754.856582                                    | 0.960034099                     | 0.00214478                                    | 5.783122868                  | 1552.942075                                |
| 1310.345828                                    | 0.948822927                     | 0.002369227                                   | 4.842808378                  | 1117.031122                                |
| 1502.532963                                    | 0.949324324                     | 0.001632811                                   | 5.017515568                  | 1285.017896                                |
| 2741.701201                                    | 0.971212121                     | 0.002516041                                   | 5.501895034                  | 2510.794783                                |
| 3991.732802                                    | 0.961177736                     | 0.000857344                                   | 6.44641065                   | 3565.623944                                |
| 2104.818919                                    | 0.931480031                     | 0.001077428                                   | 4.946265947                  | 1707.985756                                |
| 1907.847929                                    | 0.946275678                     | 0.001132354                                   | 5.011230326                  | 1617.132653                                |
| 574.1402663                                    | 0.942092423                     | 0.007175232                                   | 4.737128091                  | 484.8895874                                |
| 1748.430771                                    | 0.954703122                     | 0.002592259                                   | 5.651927675                  | 1542.873426                                |
| 1619.642827                                    | 0.949207409                     | 0.001496859                                   | 5.02625759                   | 1386.397398                                |
| 878.7230831                                    | 0.989438466                     | 0.003254036                                   | 4.333200354                  | 639.2724737                                |
| 2404.902096                                    | 0.949240625                     | 0.001335345                                   | 5.23913546                   | 2066.880064                                |
| 1220.765679                                    | 0.934824752                     | 0.002285107                                   | 4.654069491                  | 1000.216027                                |
| 5000.58521                                     | 0.954348896                     | 0.001179936                                   | 6.650063775                  | 4424.430917                                |
| 1337.681855                                    | 0.972490658                     | 0.003937338                                   | 5.539131533                  | 1226.123967                                |
| 1741.888287                                    | 0.924886144                     | 0.002046295                                   | 4.857898669                  | 1385.660643                                |
| 549.0300092                                    | 0.955197345                     | 0.006081784                                   | 4.957438324                  | 478.2353053                                |
| 1146.469654                                    | 0.941837927                     | 0.002033055                                   | 4.770798521                  | 960.7987007                                |
| 1123.178871                                    | 0.923483923                     | 0.001994433                                   | 4.709968914                  | 892.3604654                                |
| 1291.442574                                    | 0.955229201                     | 0.002490801                                   | 4.881476075                  | 1125.220424                                |
| 1085.549558                                    | 0.948467548                     | 0.002794699                                   | 4.921330656                  | 928.4679692                                |
| 2349.686081                                    | 0.958472581                     | 0.001109911                                   | 5.37292927                   | 2065.682017                                |
| 396.2173039                                    | 0.925433561                     | 0.005916594                                   | 4.332234893                  | 317.5652365                                |
| 2883.653678                                    | 0.958080332                     | 0.001016705                                   | 5.36708897                   | 2534.778662                                |
| 6242.724373                                    | 0.972233458                     | 0.000975757                                   | 6.741284551                  | 5725.012031                                |
| 1159.384665                                    | 0.932239737                     | 0.002031084                                   | 4.80112638                   | 942.14461                                  |
| 2764.47884                                     | 0.962140768                     | 0.003571123                                   | 5.318142471                  | 2462.665466                                |
| 1844.769838                                    | 0.951689012                     | 0.001496776                                   | 5.197997129                  | 1587.637121                                |
| 2556.425106                                    | 0.925259482                     | 0.0010274                                     | 4.97408058                   | 2026.210166                                |
| 5269.883599                                    | 0.961854482                     | 0.001486939                                   | 6.345893274                  | 4643.430639                                |
| 10669.94188                                    | 0.973175787                     | 0.000632929                                   | 7.113125589                  | 9818.206507                                |
| 4542.277804                                    | 0.967397709                     | 0.001479692                                   | 6.752595352                  | 4147.629574                                |
| 1585.662823                                    | 0.956281003                     | 0.001312372                                   | 5.269599362                  | 1389.117987                                |
| 1104.527263                                    | 0.918511299                     | 0.00218668                                    | 4.714466455                  | 865.2671956                                |
| 1680.828451                                    | 0.926756662                     | 0.001623394                                   | 4.733056873                  | 1338.949439                                |
| 7212.470395                                    | 0.95275215                      | 0.000754731                                   | 7.067334022                  | 6249.354836                                |
| 2337.23792                                     | 0.967542214                     | 0.001767639                                   | 5.671139296                  | 2102.116996                                |
| 8927.234093                                    | 0.960998836                     | 0.000367177                                   | 6.861639602                  | 8017.320897                                |
| 1706.89684                                     | 0.943360418                     | 0.001419067                                   | 5.012216426                  | 1429.549512                                |
| 865.661309                                     | 0.961906467                     | 0.00274286                                    | 5.064512457                  | 770.9926932                                |
| 1833.20639                                     | 0.945924319                     | 0.001280644                                   | 5.09779018                   | 1556.135403                                |
| 6438.098488                                    | 0.977213703                     | 0.000921615                                   | 6.760249072                  | 6029.982817                                |
| 10196.25672                                    | 0.962983026                     | 0.001077101                                   | 6.556995744                  | 8992.982121                                |
| 4696.954469                                    | 0.961776657                     | 0.000895552                                   | 6.403501273                  | 4243.722827                                |
| 3770.092364                                    | 0.954996122                     | 0.000625136                                   | 5.353364054                  | 3284.819599                                |
| 498.0296136                                    | 0.941181666                     | 0.004998601                                   | 4.390091327                  | 414.5361485                                |
| 726.1446779                                    | 0.953177258                     | 0.003962825                                   | 4.864338515                  | 630.680383                                 |
| 386.6476504                                    | 0.926661356                     | 0.006474535                                   | 4.2969703                    | 307.8587067                                |
| 5693.169967                                    | 0.966733539                     | 0.000945245                                   | 6.467176576                  | 5071.289483                                |
| 3948.457886                                    | 0.969445268                     | 0.000731057                                   | 5.569924082                  | 3591.652809                                |
| 917.4257538                                    | 0.94469449                      | 0.002520935                                   | 4.834576492                  | 772.8420397                                |
| 2583.415155                                    | 0.954431438                     | 0.002123795                                   | 5.46655979                   | 2251.874236                                |
| 1234.542692                                    | 0.94962406                      | 0.002570375                                   | 4.956000324                  | 1057.492108                                |
| 1375.479726                                    | 0.963155819                     | 0.002047708                                   | 5.332978192                  | 1224.119952                                |
| 5149.806352                                    | 0.965769706                     | 0.000764966                                   | 6.723123683                  | 4685.767928                                |
| 4307.514282                                    | 0.967477866                     | 0.00092919                                    | 6.313551706                  | 3873.359853                                |
| 1817.389665                                    | 0.962612024                     | 0.003101725                                   | 5.516591106                  | 1625.368589                                |
| 2430.231033                                    | 0.944732341                     | 0.000887016                                   | 5.32065032                   | 2057.865457                                |
| 2601.937154                                    | 0.974213782                     | 0.001517939                                   | 5.964572563                  | 2402.460547                                |
| 889.5938258                                    | 0.939411083                     | 0.003121947                                   | 4.864419897                  | 740.258144                                 |
| 4273.627674                                    | 0.957425887                     | 0.000664059                                   | 6.044403029                  | 3763.143142                                |
| 3910.361171                                    | 0.969202515                     | 0.001327792                                   | 6.478999914                  | 3552.919564                                |
| 500.5381921                                    | 0.936806232                     | 0.005205537                                   | 4.511655885                  | 416.1224985                                |
| 2174.572258                                    | 0.944887065                     | 0.001107012                                   | 5.24403876                   | 1839.743554                                |
| 2395.45019                                     | 0.966493629                     | 0.001932455                                   | 5.762873318                  | 2159.215083                                |
| 6409.349038                                    | 0.971458462                     | 0.000950438                                   | 6.953854911                  | 5940.645886                                |
| 2404.823527                                    | 0.961676364                     | 0.000784743                                   | 5.186021608                  | 2137.560022                                |
| 1729.216191                                    | 0.960901417                     | 0.001873936                                   | 5.720856437                  | 1539.662511                                |
| 1469.721                                       | 0.948244212                     | 0.00220114                                    | 5.263979395                  | 1253.672095                                |
| 2434.375099                                    | 0.958472297                     | 0.001074505                                   | 5.657771218                  | 2147.544043                                |
| 1163.100832                                    | 0.934147906                     | 0.002081506                                   | 4.776922163                  | 948.0081524                                |
| 3535.519477                                    | 0.966050329                     | 0.000967711                                   | 5.811277236                  | 3179.254988                                |
| 2807.920051                                    | 0.954524237                     | 0.002586958                                   | 6.415391684                  | 2570.327839                                |
| 4857.926072                                    | 0.971913333                     | 0.001814623                                   | 6.596602421                  | 4453.156593                                |
| 5469.254922                                    | 0.964652626                     | 0.000812577                                   | 6.023485318                  | 4906.304336                                |
| 352.1424104                                    | 0.920507467                     | 0.007513667                                   | 4.306477807                  | 278.1066713                                |
| 1611.726262                                    | 0.956468839                     | 0.001729928                                   | 5.211286072                  | 1408.376571                                |
| 4464.208289                                    | 0.971486829                     | 0.001415696                                   | 6.370695759                  | 4080.904704                                |
| 4826.667627                                    | 0.968905906                     | 0.001216322                                   | 5.900115517                  | 4388.14413                                 |
| 2007.348132                                    | 0.919955531                     | 0.001553436                                   | 4.914693612                  | 1565.934335                                |
| 1204.453748                                    | 0.922818081                     | 0.002076117                                   | 4.817536011                  | 954.5576251                                |
| 896.6874656                                    | 0.944929785                     | 0.003170663                                   | 4.886837359                  | 759.0997054                                |
| 7829.713089                                    | 0.972939729                     | 0.001532669                                   | 6.798249976                  | 7122.983945                                |
| 742.4122375                                    | 0.839375377                     | 0.006142466                                   | 4.351994119                  | 464.8651309                                |
| 4161.174384                                    | 0.973617159                     | 0.001362377                                   | 6.25320931                   | 3832.986734                                |
| 1451.687799                                    | 0.942574202                     | 0.001816483                                   | 5.053406952                  | 1216.787733                                |
| 1154.097493                                    | 0.951187474                     | 0.002684622                                   | 4.96672563                   | 993.0105131                                |
| 844.8938164                                    | 0.912288699                     | 0.002863495                                   | 4.257651523                  | 640.5333184                                |
| 2375.527975                                    | 0.902784332                     | 0.002031199                                   | 4.771684665                  | 1751.118175                                |
| 2918.111265                                    | 0.974165213                     | 0.001843198                                   | 6.479439753                  | 2682.642903                                |
| 4028.315766                                    | 0.964187655                     | 0.00071334                                    | 6.000112638                  | 3598.311367                                |
| 5117.560946                                    | 0.965641026                     | 0.001106724                                   | 6.42398414                   | 4578.251336                                |
| 1176.291377                                    | 0.96173289                      | 0.002564899                                   | 5.238012495                  | 1042.625144                                |
| 3065.425709                                    | 0.95670548                      | 0.000907511                                   | 5.612803201                  | 2695.932277                                |
| 1114.784525                                    | 0.940034406                     | 0.001866792                                   | 4.703448783                  | 925.5499591                                |
| 1681.302202                                    | 0.9417383                       | 0.002166906                                   | 4.885199635                  | 1402.62035                                 |
| 572.3401384                                    | 0.919572035                     | 0.00669942                                    | 4.451705536                  | 443.7676459                                |
| 8094.391087                                    | 0.960579254                     | 0.000546908                                   | 6.800516936                  | 7200.64378                                 |

| wavelet.LLH_glrIm_RunLengthNonUniformityNormalized | wavelet.LLH_glszm_GrayLevelVariance | wavelet.LLH_glszm_SmallAreaHighGrayLevelEmphasis | wavelet.LLH_glszm_GrayLevelNonUniformityNormalized |
|----------------------------------------------------|-------------------------------------|--------------------------------------------------|----------------------------------------------------|
| 0.938559379                                        | 262.3683879                         | 3501.105201                                      | 0.021353584                                        |
| 0.926833944                                        | 228.277852                          | 2994.644508                                      | 0.022949926                                        |
| 0.923775291                                        | 176.8364459                         | 1200.921002                                      | 0.022362863                                        |
| 0.904702415                                        | 59.1596542                          | 818.2036553                                      | 0.04131781                                         |
| 0.904074809                                        | 63.65591937                         | 902.5491826                                      | 0.03902087                                         |
| 0.944214499                                        | 142.735316                          | 1992.502543                                      | 0.026209311                                        |
| 0.926694145                                        | 410.1903615                         | 2856.59237                                       | 0.013819641                                        |
| 0.875845417                                        | 76.24452085                         | 1244.661123                                      | 0.037261439                                        |
| 0.899342749                                        | 64.89289649                         | 1145.253849                                      | 0.037352958                                        |
| 0.891505003                                        | 45.3331532                          | 350.3073607                                      | 0.045020199                                        |
| 0.913646624                                        | 138.8959317                         | 1186.37466                                       | 0.025663165                                        |
| 0.905083473                                        | 70.16446984                         | 983.0221826                                      | 0.037169562                                        |
| 0.82004602                                         | 36.51457466                         | 417.1912139                                      | 0.05627117                                         |
| 0.905692453                                        | 114.1452857                         | 1575.87132                                       | 0.029699952                                        |
| 0.87926395                                         | 56.81345572                         | 711.2631288                                      | 0.044858632                                        |
| 0.915813622                                        | 715.172034                          | 3781.815654                                      | 0.012515727                                        |
| 0.947675115                                        | 122.6697039                         | 943.4499089                                      | 0.025549989                                        |
| 0.863633016                                        | 76.76068115                         | 989.2979683                                      | 0.038482666                                        |
| 0.916039681                                        | 53.80706153                         | 342.1756783                                      | 0.039479706                                        |
| 0.891075237                                        | 51.67963183                         | 664.3009405                                      | 0.043914273                                        |
| 0.861762582                                        | 43.93386023                         | 613.8925154                                      | 0.045680937                                        |
| 0.915644968                                        | 56.05284834                         | 787.6003136                                      | 0.041449676                                        |
| 0.90256686                                         | 59.27097573                         | 672.2460729                                      | 0.040195028                                        |
| 0.921532692                                        | 103.7816632                         | 1520.897574                                      | 0.030640305                                        |
| 0.861451039                                        | 28.43766437                         | 217.7662475                                      | 0.056669589                                        |
| 0.921133571                                        | 117.7053618                         | 1908.681501                                      | 0.029821297                                        |
| 0.946970475                                        | 640.7248769                         | 4672.667941                                      | 0.011386438                                        |
| 0.875688804                                        | 56.34002895                         | 638.6992561                                      | 0.041662098                                        |
| 0.928830208                                        | 142.4079733                         | 1903.390468                                      | 0.030236027                                        |
| 0.90843132                                         | 79.94081598                         | 1080.86291                                       | 0.033959083                                        |
| 0.865502415                                        | 92.27570953                         | 1446.768279                                      | 0.035463857                                        |
| 0.928089216                                        | 464.7635239                         | 3277.205167                                      | 0.015603284                                        |
| 0.947959694                                        | 1177.417262                         | 7882.391643                                      | 0.008604645                                        |
| 0.938195102                                        | 792.1938011                         | 3481.911091                                      | 0.011148822                                        |
| 0.917326233                                        | 87.11362913                         | 1043.714856                                      | 0.031463717                                        |
| 0.853903908                                        | 55.50862237                         | 648.9043513                                      | 0.043284643                                        |
| 0.866527168                                        | 59.84066407                         | 937.3831599                                      | 0.042159324                                        |
| 0.912415591                                        | 990.4244335                         | 5003.21362                                       | 0.009368218                                        |
| 0.937355172                                        | 151.6540826                         | 1487.814308                                      | 0.024302907                                        |
| 0.925766434                                        | 771.5260803                         | 6425.702966                                      | 0.010970932                                        |
| 0.896282328                                        | 70.87856604                         | 999.8521386                                      | 0.037271828                                        |
| 0.927091624                                        | 59.81689444                         | 568.2591251                                      | 0.036929125                                        |
| 0.900055333                                        | 85.68248477                         | 1150.589322                                      | 0.034978981                                        |
| 0.95580485                                         | 658.0502291                         | 5104.014341                                      | 0.010998554                                        |
| 0.930492793                                        | 831.068428                          | 6514.293215                                      | 0.012825699                                        |
| 0.927158241                                        | 665.5048004                         | 3516.841229                                      | 0.014719545                                        |
| 0.91595369                                         | 104.4359979                         | 2467.273854                                      | 0.030108592                                        |
| 0.890721227                                        | 28.52004723                         | 258.475353                                       | 0.05393827                                         |
| 0.911956623                                        | 53.54505356                         | 480.3454544                                      | 0.041334997                                        |
| 0.866813478                                        | 25.27854671                         | 207.7950438                                      | 0.059134407                                        |
| 0.936719781                                        | 521.3301656                         | 3657.874998                                      | 0.013368733                                        |
| 0.94116844                                         | 122.0476422                         | 2754.964451                                      | 0.026650832                                        |
| 0.896559313                                        | 46.56011067                         | 515.8109676                                      | 0.042823501                                        |
| 0.913129325                                        | 141.3066203                         | 1579.209553                                      | 0.02776194                                         |
| 0.904976722                                        | 64.21438352                         | 743.0370697                                      | 0.038520183                                        |
| 0.928906518                                        | 90.22576696                         | 869.6083405                                      | 0.031202848                                        |
| 0.934337322                                        | 635.4822335                         | 3757.228918                                      | 0.011779136                                        |
| 0.937388648                                        | 352.0300599                         | 2877.642122                                      | 0.015319776                                        |
| 0.929021782                                        | 136.6141994                         | 1289.206896                                      | 0.02629489                                         |
| 0.89993033                                         | 98.81300313                         | 1570.288348                                      | 0.031272471                                        |
| 0.949872812                                        | 212.5293342                         | 1898.711265                                      | 0.019591837                                        |
| 0.888107538                                        | 59.21854056                         | 529.4414554                                      | 0.038887629                                        |
| 0.919976693                                        | 269.188423                          | 2961.830273                                      | 0.020380385                                        |
| 0.940310687                                        | 409.243293                          | 2710.811818                                      | 0.014395901                                        |
| 0.881502196                                        | 39.4459117                          | 294.5513113                                      | 0.050992946                                        |
| 0.898096897                                        | 100.8220754                         | 1343.085443                                      | 0.030838989                                        |
| 0.93547371                                         | 174.4646392                         | 1617.099442                                      | 0.022678478                                        |
| 0.944901347                                        | 809.1818353                         | 5011.017623                                      | 0.009948313                                        |
| 0.926786072                                        | 79.64216352                         | 1584.100246                                      | 0.034550467                                        |
| 0.925270313                                        | 148.821645                          | 1165.107119                                      | 0.02373334                                         |
| 0.903954936                                        | 94.98320008                         | 908.4612926                                      | 0.031174841                                        |
| 0.921585381                                        | 150.1914804                         | 1608.587576                                      | 0.024684045                                        |
| 0.878968093                                        | 55.19672585                         | 644.2049348                                      | 0.042859441                                        |
| 0.93420823                                         | 173.8181985                         | 2319.896938                                      | 0.023005951                                        |
| 0.915557658                                        | 628.5877689                         | 2456.552293                                      | 0.014509588                                        |
| 0.946126389                                        | 607.364177                          | 3442.100542                                      | 0.012251879                                        |
| 0.932125022                                        | 304.3858119                         | 3699.214844                                      | 0.019931646                                        |
| 0.855612714                                        | 30.01710926                         | 199.9325654                                      | 0.05623266                                         |
| 0.916576998                                        | 86.90438532                         | 1009.038568                                      | 0.032118746                                        |
| 0.944627598                                        | 362.8927538                         | 3121.093071                                      | 0.014806165                                        |
| 0.939552015                                        | 262.5457322                         | 3453.96191                                       | 0.021532574                                        |
| 0.855572327                                        | 74.83236163                         | 1127.894078                                      | 0.036002157                                        |
| 0.861313359                                        | 66.00973377                         | 709.3017357                                      | 0.04054338                                         |
| 0.896902474                                        | 48.80602758                         | 530.6266696                                      | 0.042137998                                        |
| 0.947950323                                        | 881.6887884                         | 5306.911652                                      | 0.010737536                                        |
| 0.730987249                                        | 41.91184657                         | 379.4917828                                      | 0.052939323                                        |
| 0.948740375                                        | 321.3478668                         | 3038.190951                                      | 0.015924075                                        |
| 0.893500035                                        | 77.51523659                         | 851.7682195                                      | 0.036211488                                        |
| 0.908452384                                        | 67.85491663                         | 718.4971581                                      | 0.039058785                                        |
| 0.842039484                                        | 26.22815744                         | 414.9458                                         | 0.061224048                                        |
| 0.830450417                                        | 79.35207101                         | 1291.768866                                      | 0.038817664                                        |
| 0.949940984                                        | 422.3145562                         | 2073.051802                                      | 0.01375302                                         |
| 0.931031771                                        | 249.3014072                         | 2666.435974                                      | 0.020104699                                        |
| 0.934305114                                        | 397.3314592                         | 3373.46174                                       | 0.014407574                                        |
| 0.926454766                                        | 75.76534278                         | 743.9257399                                      | 0.03292145                                         |
| 0.918273064                                        | 163.9365463                         | 2091.464451                                      | 0.024814243                                        |
| 0.888457802                                        | 39.3464826                          | 634.2068286                                      | 0.047161615                                        |
| 0.893762247                                        | 80.76225359                         | 1068.06034                                       | 0.037962655                                        |
| 0.852365641                                        | 28.97611076                         | 292.0316595                                      | 0.056193311                                        |
| 0.92556367                                         | 789.9171094                         | 5716.66302                                       | 0.011152548                                        |

| wavelet.LLH_glszm_SizeZoneNonUniformityNormalized | wavelet.LLH_glszm_SizeZoneNonUniformity | wavelet.LLH_glszm_GrayLevelNonUniformity | wavelet.LLH_glszm_LargeAreaEmphasis | wavelet.LLH_glszm_ZoneVariance |
|---------------------------------------------------|-----------------------------------------|------------------------------------------|-------------------------------------|--------------------------------|
| 0.582370286                                       | 830.4600281                             | 30.45021038                              | 3.667601683                         | 1.453223938                    |
| 0.537405091                                       | 312.232358                              | 13.33390706                              | 4.683304647                         | 2.093476438                    |
| 0.565569484                                       | 532.7664544                             | 21.06581741                              | 5.428874735                         | 2.777024986                    |
| 0.501741132                                       | 257.8949416                             | 21.23735409                              | 10.57392996                         | 6.960972157                    |
| 0.465367444                                       | 573.7980535                             | 48.11273317                              | 9.248986212                         | 5.560592756                    |
| 0.594377609                                       | 268.0643016                             | 11.82039911                              | 3.543237251                         | 1.401654859                    |
| 0.570627191                                       | 2043.9866                               | 49.50195422                              | 8.787548855                         | 6.29869468                     |
| 0.479100147                                       | 1100.013937                             | 85.55226481                              | 59.03919861                         | 54.08973643                    |
| 0.46947893                                        | 1086.374244                             | 86.43474503                              | 11.25237684                         | 7.392866988                    |
| 0.463670786                                       | 240.1814672                             | 23.32046332                              | 12.65637066                         | 8.373548397                    |
| 0.469009287                                       | 391.6227545                             | 21.42874251                              | 6.524550898                         | 3.262958156                    |
| 0.479589956                                       | 575.028357                              | 44.56630525                              | 9.458715596                         | 5.762957872                    |
| 0.40852748                                        | 234.4947735                             | 32.29965157                              | 109.2770035                         | 98.69751059                    |
| 0.504818069                                       | 455.345898                              | 26.78935698                              | 10.36252772                         | 6.739033977                    |
| 0.462507134                                       | 400.5311778                             | 38.84757506                              | 26.16166282                         | 20.91301356                    |
| 0.551568597                                       | 1415.325019                             | 32.11535464                              | 8.456742011                         | 5.548427819                    |
| 0.570171163                                       | 472.6718938                             | 21.18094089                              | 2.943305187                         | 0.868871328                    |
| 0.46346283                                        | 237.2929688                             | 19.703125                                | 46.01367188                         | 40.21422958                    |
| 0.481201079                                       | 342.6151685                             | 28.10955056                              | 6.834269663                         | 3.510817763                    |
| 0.44758965                                        | 1079.586235                             | 105.9212272                              | 13.74585406                         | 9.099791775                    |
| 0.422270426                                       | 507.5690516                             | 54.90848586                              | 36.88352745                         | 30.55424265                    |
| 0.454629728                                       | 264.5945017                             | 24.12371134                              | 7.365979381                         | 3.928841771                    |
| 0.474277748                                       | 254.6871508                             | 21.58472998                              | 9.720670391                         | 6.084440422                    |
| 0.506373649                                       | 792.4747604                             | 47.95207668                              | 5.49456869                          | 2.633823352                    |
| 0.407407407                                       | 190.6666667                             | 26.52136752                              | 45.77136752                         | 38.37250256                    |
| 0.535718064                                       | 760.1839323                             | 42.31642001                              | 4.316420014                         | 3.529238002                    |
| 0.639200224                                       | 1490.614923                             | 26.55317324                              | 3.44296741                          | 1.520963278                    |
| 0.442952064                                       | 535.0860927                             | 50.32781457                              | 28.17218543                         | 22.94445145                    |
| 0.522580442                                       | 143.189781                              | 8.284671533                              | 4.726277372                         | 2.064854281                    |
| 0.457668575                                       | 497.4857406                             | 36.91352346                              | 7.930082797                         | 4.359477948                    |
| 0.475866317                                       | 956.0154306                             | 71.246889                                | 48.49576904                         | 42.88672304                    |
| 0.537247553                                       | 694.123839                              | 20.15944272                              | 5.667956656                         | 3.103496511                    |
| 0.600809475                                       | 1381.260983                             | 19.78207916                              | 2.905176164                         | 0.932489323                    |
| 0.583311287                                       | 909.3822963                             | 17.38101347                              | 3.865298268                         | 1.593114285                    |
| 0.51955459                                        | 1311.355784                             | 79.41442155                              | 7.061014263                         | 4.016514676                    |
| 0.471857651                                       | 549.7141631                             | 50.42660944                              | 98.23948498                         | 91.61272744                    |
| 0.458578136                                       | 688.3257828                             | 63.2811459                               | 45.32644903                         | 39.18093867                    |
| 0.555864517                                       | 1695.942642                             | 28.58243199                              | 7.957718781                         | 5.096287616                    |
| 0.519953759                                       | 415.4430538                             | 19.41802253                              | 3.474342929                         | 1.104515814                    |
| 0.536852631                                       | 2424.426484                             | 49.54472985                              | 5.225863596                         | 2.634305463                    |
| 0.458474927                                       | 589.5987558                             | 47.93157076                              | 16.55365474                         | 12.48493285                    |
| 0.498882368                                       | 1159.901505                             | 85.86021505                              | 4.949247312                         | 2.182927229                    |
| 0.483435614                                       | 904.0245989                             | 65.41069519                              | 21.92032086                         | 18.10425262                    |
| 0.634271939                                       | 1171.500271                             | 20.31672983                              | 2.485193828                         | 0.671652094                    |
| 0.580624628                                       | 476.1121951                             | 45.54634163                              | 4.54634163                          | 2.117305175                    |
| 0.534505529                                       | 897.4347826                             | 24.71411554                              | 5.047647409                         | 2.374743752                    |
| 0.528530352                                       | 1386.335112                             | 78.97483797                              | 15.68051849                         | 12.65559788                    |
| 0.387525721                                       | 149.1974026                             | 20.76623377                              | 13.17662338                         | 8.058451678                    |
| 0.498801915                                       | 240.9213251                             | 19.96480331                              | 6.726708075                         | 3.622399685                    |
| 0.407365106                                       | 221.6066176                             | 32.16911765                              | 24.90073529                         | 18.72404844                    |
| 0.576625044                                       | 972.7664493                             | 22.55305276                              | 4.15708358                          | 1.838098026                    |
| 0.559680984                                       | 1273.833919                             | 60.6572935                               | 3.444200351                         | 1.250521797                    |
| 0.437647131                                       | 947.0683919                             | 92.67005545                              | 12.73197782                         | 8.384637199                    |
| 0.460889873                                       | 278.3774834                             | 16.76821192                              | 6.930463576                         | 3.589557476                    |
| 0.469260194                                       | 328.0128755                             | 26.92560801                              | 8.234620887                         | 4.614284457                    |
| 0.509367361                                       | 612.2595674                             | 37.50582363                              | 4.524126456                         | 1.892281583                    |
| 0.544762179                                       | 1425.097859                             | 30.81422018                              | 4.096712538                         | 1.705811654                    |
| 0.553616723                                       | 1264.460595                             | 34.99036778                              | 3.917688266                         | 1.625460448                    |
| 0.554503                                          | 568.920078                              | 26.9785575                               | 5.021442495                         | 2.441442571                    |
| 0.5163181                                         | 2567.64991                              | 155.5179972                              | 33.03458677                         | 29.6647451                     |
| 0.592135299                                       | 746.0904762                             | 24.68571429                              | 2.804761905                         | 0.840314941                    |
| 0.473949358                                       | 597.1761905                             | 48.9984127                               | 20.66507937                         | 16.17471655                    |
| 0.517078428                                       | 1742.554303                             | 68.68189911                              | 7.7102967359                        | 4.152116247                    |
| 0.555837163                                       | 2833.102021                             | 73.3759074                               | 3.420639592                         | 1.183863189                    |
| 0.409552056                                       | 146.210084                              | 18.20448179                              | 11.61344538                         | 6.716584673                    |
| 0.486392872                                       | 951.3844581                             | 60.32106339                              | 28.2924335                          | 18.93083941                    |
| 0.541186933                                       | 457.3029586                             | 19.16331361                              | 3.824852071                         | 1.443400441                    |
| 0.579339601                                       | 2494.636321                             | 42.83743614                              | 3.208546215                         | 1.101801157                    |
| 0.515884086                                       | 1827.261434                             | 122.3777527                              | 5.252117448                         | 2.517772294                    |
| 0.506543766                                       | 888.4777651                             | 41.62827822                              | 5.102622577                         | 2.372780119                    |
| 0.487249369                                       | 345.4598025                             | 22.10296192                              | 10.75176305                         | 7.394960223                    |
| 0.525589542                                       | 1340.253333                             | 62.94431373                              | 6.580392157                         | 3.750080738                    |
| 0.447198808                                       | 457.037182                              | 43.80234834                              | 16.22798434                         | 11.25534618                    |
| 0.520327582                                       | 751.8733564                             | 33.24359862                              | 3.812456747                         | 1.368481699                    |
| 0.55145159                                        | 1017.428184                             | 26.7701897                               | 8.427642276                         | 5.547768891                    |
| 0.585435304                                       | 546.7965739                             | 11.44325482                              | 3.05353191                          | 0.989050342                    |
| 0.551013007                                       | 843.6009144                             | 30.51534944                              | 4.231221424                         | 1.78202709                     |
| 0.394702074                                       | 137.3563218                             | 19.56896552                              | 45.25287356                         | 37.67456071                    |
| 0.491247509                                       | 471.1063608                             | 30.80187696                              | 6.683003128                         | 3.514677372                    |
| 0.571086482                                       | 921.7335812                             | 23.89714994                              | 3.060099133                         | 0.959934295                    |
| 0.588023086                                       | 793.2431431                             | 29.04744255                              | 3.575240919                         | 1.401310363                    |
| 0.479639612                                       | 363.0871863                             | 27.25363276                              | 62.57992074                         | 56.93223442                    |
| 0.473068527                                       | 648.5769511                             | 55.58497447                              | 75.54266958                         | 69.85734936                    |
| 0.424077005                                       | 623.3931973                             | 61.94285714                              | 11.36122449                         | 6.991133787                    |
| 0.599420771                                       | 1030.404305                             | 18.45782432                              | 2.931355439                         | 0.918225317                    |
| 0.450159308                                       | 152.1538462                             | 17.89349112                              | 700.7514793                         | 680.2075207                    |
| 0.606907694                                       | 1035.384525                             | 27.16647128                              | 3.104923798                         | 1.150500131                    |
| 0.465794655                                       | 618.5753012                             | 48.08885542                              | 14.78012048                         | 10.5168906                     |
| 0.480903891                                       | 377.5095541                             | 30.6611465                               | 9.031847134                         | 5.53740923                     |
| 0.400878028                                       | 272.5970588                             | 41.63235294                              | 68.53382353                         | 59.66568988                    |
| 0.484787055                                       | 226.8803419                             | 18.16666667                              | 173.2948718                         | 165.531266                     |
| 0.590482826                                       | 997.9159763                             | 23.24260355                              | 2.818934911                         | 0.832336403                    |
| 0.547785486                                       | 1801.666464                             | 66.12435391                              | 4.874733962                         | 2.391402614                    |
| 0.553049148                                       | 1190.714817                             | 31.01950766                              | 3.945192754                         | 1.595885498                    |
| 0.496836431                                       | 1301.71145                              | 86.25419847                              | 4.665648855                         | 1.906499621                    |
| 0.545424388                                       | 1105.575234                             | 50.29847065                              | 6.61174149                          | 3.761691268                    |
| 0.447516673                                       | 601.014892                              | 63.33804914                              | 12.66195086                         | 8.262264997                    |
| 0.51674779                                        | 267.1586074                             | 19.62669246                              | 14.68665377                         | 10.58544123                    |
| 0.384548611                                       | 129.2083333                             | 18.88095238                              | 21.17261905                         | 15.01158588                    |
| 0.561702574                                       | 2032.239912                             | 40.34991708                              | 5.17634052                          | 2.629413891                    |

| wavelet.LLH_glszm_ZonePercentage | wavelet.LLH_glszm_LargeAreaLowGrayLevelEmphasis | wavelet.LLH_glszm_LargeAreaHighGrayLevelEmphasis | wavelet.LLH_glszm_HighGrayLevelZoneEmphasis |
|----------------------------------|-------------------------------------------------|--------------------------------------------------|---------------------------------------------|
| 0.67200754                       | 0.002404936                                     | 16358.08976                                      | 4426.328191                                 |
| 0.621390374                      | 0.003183673                                     | 18561.06024                                      | 4003.650602                                 |
| 0.614080834                      | 0.006411428                                     | 8498.268577                                      | 1546.464968                                 |
| 0.526100307                      | 0.011969589                                     | 11975.54669                                      | 1113.513619                                 |
| 0.520692568                      | 0.008809022                                     | 11890.56285                                      | 1273.48824                                  |
| 0.683333333                      | 0.004417506                                     | 8861.884701                                      | 2499.827051                                 |
| 0.633870111                      | 0.00402919                                      | 27676.33026                                      | 3630.737018                                 |
| 0.449490995                      | 0.037894567                                     | 94189.64634                                      | 1732.97561                                  |
| 0.509018918                      | 0.008021747                                     | 17882.23293                                      | 1614.475367                                 |
| 0.483208955                      | 0.040914859                                     | 5446.92471                                       | 501.9555985                                 |
| 0.553713528                      | 0.008806592                                     | 8938.003593                                      | 1628.023952                                 |
| 0.520173536                      | 0.008400921                                     | 12772.71226                                      | 1382.428691                                 |
| 0.307445099                      | 0.180556259                                     | 67796.04878                                      | 639.7560976                                 |
| 0.525334886                      | 0.006827857                                     | 20118.62417                                      | 2121.721729                                 |
| 0.436491935                      | 0.029686182                                     | 25364.39261                                      | 1010.667436                                 |
| 0.586380256                      | 0.005393107                                     | 32531.64458                                      | 4726.464147                                 |
| 0.694304858                      | 0.007033399                                     | 3653.07117                                       | 1213.740651                                 |
| 0.415247364                      | 0.03796853                                      | 60118.39648                                      | 1403.882813                                 |
| 0.54853621                       | 0.023039922                                     | 3211.984551                                      | 476.883427                                  |
| 0.463935372                      | 0.016770367                                     | 12798.24337                                      | 963.6094527                                 |
| 0.397486772                      | 0.047118633                                     | 30125.55075                                      | 914.1838602                                 |
| 0.539388323                      | 0.009407441                                     | 8245.766323                                      | 1125.747423                                 |
| 0.524414063                      | 0.014241378                                     | 8676.921788                                      | 935.6294227                                 |
| 0.591235361                      | 0.003692928                                     | 11339.17188                                      | 2064.092652                                 |
| 0.367635507                      | 0.166797885                                     | 13227.0406                                       | 328.215812                                  |
| 0.598986914                      | 0.00351088                                      | 15733.90909                                      | 2524.579281                                 |
| 0.721311475                      | 0.001905451                                     | 20214.19726                                      | 5683.97813                                  |
| 0.437364229                      | 0.033070736                                     | 25477.39238                                      | 942.8807947                                 |
| 0.612975391                      | 0.006881306                                     | 11575.56204                                      | 2489.70438                                  |
| 0.529211295                      | 0.006601245                                     | 12587.42134                                      | 1561.517939                                 |
| 0.422236234                      | 0.025885441                                     | 94613.99204                                      | 2030.334993                                 |
| 0.624456259                      | 0.004562973                                     | 27532.30341                                      | 4447.135449                                 |
| 0.711985135                      | 0.00117005                                      | 28368.23662                                      | 9832.809917                                 |
| 0.663404255                      | 0.003527468                                     | 14976.21552                                      | 4283.495189                                 |
| 0.57311535                       | 0.006285434                                     | 9529.331616                                      | 1396.297544                                 |
| 0.388462821                      | 0.129713                                        | 75851.84206                                      | 907.7476395                                 |
| 0.403386187                      | 0.036500577                                     | 59779.21586                                      | 1341.58561                                  |
| 0.591164503                      | 0.00306343                                      | 50987.70796                                      | 6377.6765                                   |
| 0.649593496                      | 0.003729241                                     | 7693.294118                                      | 2037.64831                                  |
| 0.621182944                      | 0.001266916                                     | 37391.47697                                      | 8316.502657                                 |
| 0.495759445                      | 0.013084575                                     | 23264.06376                                      | 1426.045879                                 |
| 0.601241272                      | 0.009190966                                     | 3787.710108                                      | 771.6163441                                 |
| 0.511908021                      | 0.016279768                                     | 31802.81872                                      | 1586.602674                                 |
| 0.742363344                      | 0.001602886                                     | 14543.95127                                      | 6122.517596                                 |
| 0.641627543                      | 0.002018517                                     | 44363.72683                                      | 8545.691463                                 |
| 0.611657559                      | 0.002991942                                     | 18416.3645                                       | 4515.119714                                 |
| 0.57496712                       | 0.005564044                                     | 48586.14868                                      | 3288.398399                                 |
| 0.442020666                      | 0.036902268                                     | 5589.631169                                      | 408.415844                                  |
| 0.567567568                      | 0.015280322                                     | 4073.014493                                      | 644.2463768                                 |
| 0.402366864                      | 0.091629906                                     | 7405.773897                                      | 313.2794118                                 |
| 0.656675749                      | 0.002015559                                     | 23445.14701                                      | 4788.664493                                 |
| 0.675170573                      | 0.001594903                                     | 12498.10325                                      | 3567.933656                                 |
| 0.479609929                      | 0.020463241                                     | 9622.124769                                      | 764.4731978                                 |
| 0.547101449                      | 0.00721458                                      | 15124.64404                                      | 2260.65894                                  |
| 0.52556391                       | 0.010731622                                     | 8680.356223                                      | 1051.198856                                 |
| 0.616410256                      | 0.005803693                                     | 5735.019967                                      | 1191.836106                                 |
| 0.646724351                      | 0.002248936                                     | 17280.37424                                      | 4822.996942                                 |
| 0.660497397                      | 0.002119258                                     | 16065.46103                                      | 3775.714536                                 |
| 0.622572816                      | 0.008901643                                     | 8081.153021                                      | 1647.065302                                 |
| 0.544747508                      | 0.018746294                                     | 60603.95476                                      | 2097.314699                                 |
| 0.713476784                      | 0.002890795                                     | 6841.547619                                      | 2384.607143                                 |
| 0.471910112                      | 0.034813345                                     | 14389.1881                                       | 745.3674603                                 |
| 0.582138539                      | 0.002806406                                     | 26370.77834                                      | 3869.437685                                 |
| 0.668634396                      | 0.003566898                                     | 12512.28546                                      | 3514.183834                                 |
| 0.451898734                      | 0.03733735                                      | 4377.487395                                      | 437.5434174                                 |
| 0.50647333                       | 0.014274083                                     | 39285.19888                                      | 1858.814928                                 |
| 0.648006135                      | 0.004528341                                     | 8389.994083                                      | 2133.862722                                 |
| 0.68896                          | 0.002583765                                     | 17287.65188                                      | 6184.25778                                  |
| 0.604746457                      | 0.00293053                                      | 11224.75127                                      | 2130.182383                                 |
| 0.605244997                      | 0.006072555                                     | 7485.131129                                      | 1561.107184                                 |
| 0.545804465                      | 0.011536612                                     | 13052.74612                                      | 1257.706629                                 |
| 0.594405594                      | 0.004417061                                     | 13433.20588                                      | 2148.561961                                 |
| 0.448442299                      | 0.019625991                                     | 14931.32779                                      | 945.3023483                                 |
| 0.639663568                      | 0.00225179                                      | 12451.20069                                      | 3127.383391                                 |
| 0.589268604                      | 0.013793364                                     | 12021.97561                                      | 3019.506233                                 |
| 0.695976155                      | 0.003173645                                     | 13549.01178                                      | 4403.190578                                 |
| 0.638981636                      | 0.001862357                                     | 20644.55976                                      | 4861.561724                                 |
| 0.363256785                      | 0.18590617                                      | 11684.22414                                      | 296.4195402                                 |
| 0.561804335                      | 0.006490906                                     | 9489.223149                                      | 1394.944734                                 |
| 0.690038478                      | 0.002507112                                     | 12872.83086                                      | 4020.819083                                 |
| 0.678230266                      | 0.002476073                                     | 15862.15048                                      | 4361.677539                                 |
| 0.420789327                      | 0.042318781                                     | 96549.04491                                      | 1575.089828                                 |
| 0.41939431                       | 0.087859398                                     | 66558.49964                                      | 987.0503282                                 |
| 0.478359909                      | 0.023428679                                     | 8301.342177                                      | 774.3204082                                 |
| 0.704797048                      | 0.002604585                                     | 23099.71262                                      | 6792.516579                                 |
| 0.220626632                      | 1.834404982                                     | 271149.7781                                      | 546.8313609                                 |
| 0.715303983                      | 0.002415728                                     | 11881.0891                                       | 3796.263775                                 |
| 0.484318016                      | 0.014630503                                     | 17253.18449                                      | 1214.494729                                 |
| 0.536202186                      | 0.012641176                                     | 8781.169427                                      | 997.289172                                  |
| 0.335802469                      | 0.112148466                                     | 43085.44559                                      | 641.7058824                                 |
| 0.358895706                      | 0.10637996                                      | 291475.1026                                      | 1792.038462                                 |
| 0.709487825                      | 0.004014179                                     | 7887.049112                                      | 2632.760947                                 |
| 0.634574571                      | 0.002066774                                     | 18062.9477                                       | 3521.496199                                 |
| 0.652424242                      | 0.003043579                                     | 19111.13748                                      | 4442.894101                                 |
| 0.602022059                      | 0.00718678                                      | 5046.481298                                      | 1024.946183                                 |
| 0.592343659                      | 0.003515221                                     | 17094.92008                                      | 2728.981746                                 |
| 0.476748314                      | 0.015454094                                     | 11464.6694                                       | 922.0513775                                 |
| 0.493791786                      | 0.013472212                                     | 19948.5087                                       | 1424.686654                                 |
| 0.402877698                      | 0.062515246                                     | 9629.809524                                      | 443.7529762                                 |
| 0.626602009                      | 0.001643342                                     | 37294.85047                                      | 7281.653123                                 |

| wavelet.LLH_glszm_SmallAreaEmphasis | wavelet.LLH_glszm_LowGrayLevelZoneEmphasis | wavelet.LLH_glszm_ZoneEntropy | wavelet.LLH_glszm_SmallAreaLowGrayLevelEmphasis | wavelet.LLH_ngtdm_Coarseness |
|-------------------------------------|--------------------------------------------|-------------------------------|-------------------------------------------------|------------------------------|
| 0.791403113                         | 0.00140932                                 | 7.012522601                   | 0.001314031                                     | 0.004238423                  |
| 0.761456652                         | 0.002180499                                | 6.836881564                   | 0.00211253                                      | 0.011190805                  |
| 0.779780901                         | 0.002633807                                | 6.839347373                   | 0.002410796                                     | 0.006753221                  |
| 0.735500457                         | 0.00318106                                 | 6.192898732                   | 0.002895811                                     | 0.007568703                  |
| 0.709294919                         | 0.002001318                                | 6.503020256                   | 0.001720639                                     | 0.003359974                  |
| 0.799133715                         | 0.003338835                                | 6.434506112                   | 0.003248805                                     | 0.011966574                  |
| 0.783883694                         | 0.00094948                                 | 7.530937927                   | 0.000827667                                     | 0.002486606                  |
| 0.719746929                         | 0.001248769                                | 6.63909508                    | 0.001067053                                     | 0.001493026                  |
| 0.71256311                          | 0.001284965                                | 6.606953382                   | 0.001065245                                     | 0.00172574                   |
| 0.706763072                         | 0.010109461                                | 6.160222564                   | 0.008983921                                     | 0.006924213                  |
| 0.711794986                         | 0.003502029                                | 6.936716982                   | 0.003216372                                     | 0.007423901                  |
| 0.720120472                         | 0.001830583                                | 6.541047995                   | 0.001594598                                     | 0.003368041                  |
| 0.664352232                         | 0.004319082                                | 6.201707446                   | 0.003597152                                     | 0.003969945                  |
| 0.738412967                         | 0.001810653                                | 6.68776862                    | 0.001664982                                     | 0.004747553                  |
| 0.707103957                         | 0.003081597                                | 6.329480856                   | 0.002699774                                     | 0.003722803                  |
| 0.77083278                          | 0.000966017                                | 7.792037296                   | 0.000489854                                     | 0.003622097                  |
| 0.783793188                         | 0.00493345                                 | 6.540985522                   | 0.004682998                                     | 0.007783523                  |
| 0.707777053                         | 0.003144088                                | 6.49044683                    | 0.002905707                                     | 0.00697471                   |
| 0.712327509                         | 0.007647866                                | 6.32311044                    | 0.006655424                                     | 0.005787284                  |
| 0.695935007                         | 0.002497049                                | 6.517209782                   | 0.002132016                                     | 0.001417849                  |
| 0.675865411                         | 0.002237637                                | 6.487472694                   | 0.001839896                                     | 0.002556223                  |
| 0.700438427                         | 0.003402421                                | 6.288312196                   | 0.003093733                                     | 0.006733422                  |
| 0.716079013                         | 0.003569604                                | 6.276758455                   | 0.003116304                                     | 0.007282948                  |
| 0.739621442                         | 0.001346671                                | 6.720553364                   | 0.001201421                                     | 0.003506088                  |
| 0.663623709                         | 0.007236392                                | 6.060210188                   | 0.005985613                                     | 0.005851493                  |
| 0.76027884                          | 0.001272839                                | 6.652261443                   | 0.001163093                                     | 0.003380639                  |
| 0.826951607                         | 0.001141648                                | 7.538608712                   | 0.00107409                                      | 0.00449714                   |
| 0.69217698                          | 0.002461401                                | 6.491630571                   | 0.002094123                                     | 0.002849494                  |
| 0.75069835                          | 0.005260057                                | 6.283053144                   | 0.005140357                                     | 0.01614509                   |
| 0.703422806                         | 0.001950308                                | 6.664433381                   | 0.001738213                                     | 0.004172405                  |
| 0.717253118                         | 0.001320887                                | 6.765585764                   | 0.001161052                                     | 0.001691491                  |
| 0.761506039                         | 0.001583234                                | 7.40759437                    | 0.001305558                                     | 0.007034838                  |
| 0.803587009                         | 0.000754512                                | 7.968959165                   | 0.000708666                                     | 0.006307042                  |
| 0.791896217                         | 0.001733062                                | 7.694390162                   | 0.001579668                                     | 0.007385834                  |
| 0.748987667                         | 0.001433931                                | 6.650617303                   | 0.001208627                                     | 0.001886524                  |
| 0.714063796                         | 0.002514171                                | 6.366475028                   | 0.002138839                                     | 0.002594309                  |
| 0.703972953                         | 0.002053084                                | 6.513630842                   | 0.001683898                                     | 0.001998247                  |
| 0.773773217                         | 0.000832499                                | 8.084506326                   | 0.000714198                                     | 0.004015828                  |
| 0.749292563                         | 0.002193559                                | 6.753461731                   | 0.001998631                                     | 0.007781917                  |
| 0.761155929                         | 0.000424568                                | 8.030365141                   | 0.000378698                                     | 0.002551153                  |
| 0.703886892                         | 0.001739113                                | 6.583246951                   | 0.001498005                                     | 0.003057308                  |
| 0.734237014                         | 0.003075294                                | 6.415411334                   | 0.00259736                                      | 0.001829982                  |
| 0.72295502                          | 0.001496721                                | 6.640107902                   | 0.00128093                                      | 0.002077677                  |
| 0.824135522                         | 0.001054524                                | 7.552287852                   | 0.000981054                                     | 0.005927846                  |
| 0.789496754                         | 0.001505303                                | 7.489141279                   | 0.001465303                                     | 0.01062372                   |
| 0.75952028                          | 0.001039882                                | 7.562913484                   | 0.000924822                                     | 0.005625757                  |
| 0.75541847                          | 0.000743678                                | 6.693044907                   | 0.000663643                                     | 0.001835496                  |
| 0.643147745                         | 0.006568144                                | 6.000460402                   | 0.00557937                                      | 0.007143041                  |
| 0.734156028                         | 0.004861421                                | 6.150016623                   | 0.004311373                                     | 0.00837032                   |
| 0.663668812                         | 0.007934237                                | 6.062443801                   | 0.006570843                                     | 0.005099951                  |
| 0.787692808                         | 0.001194809                                | 7.508535329                   | 0.001115081                                     | 0.005194711                  |
| 0.776700782                         | 0.000876663                                | 6.685829201                   | 0.000807786                                     | 0.002400202                  |
| 0.687171066                         | 0.002435987                                | 6.483898178                   | 0.001583245                                     | 0.001641909                  |
| 0.70477139                          | 0.002759379                                | 6.812519417                   | 0.002438587                                     | 0.008509628                  |
| 0.712359179                         | 0.003488058                                | 6.431431885                   | 0.003161003                                     | 0.005511126                  |
| 0.741629707                         | 0.002410026                                | 6.570598167                   | 0.002094974                                     | 0.004227997                  |
| 0.766410261                         | 0.000842533                                | 7.769263602                   | 0.000734884                                     | 0.004625595                  |
| 0.772603824                         | 0.001112891                                | 7.37528333                    | 0.001007997                                     | 0.003599292                  |
| 0.772967888                         | 0.003069653                                | 6.710724781                   | 0.002117034                                     | 0.005296923                  |
| 0.746763086                         | 0.000917776                                | 6.75169513                    | 0.000750961                                     | 0.000881633                  |
| 0.798132501                         | 0.001764159                                | 6.862002258                   | 0.001628088                                     | 0.005442666                  |
| 0.715880712                         | 0.00314705                                 | 6.460964558                   | 0.002083131                                     | 0.002920542                  |
| 0.747328528                         | 0.000775822                                | 7.310927722                   | 0.000673286                                     | 0.002210298                  |
| 0.774237478                         | 0.001356216                                | 7.553116735                   | 0.001126576                                     | 0.001880319                  |
| 0.665334594                         | 0.006341235                                | 6.115876981                   | 0.005345498                                     | 0.008394934                  |
| 0.724988937                         | 0.001339001                                | 6.814935116                   | 0.001165703                                     | 0.002216219                  |
| 0.763901196                         | 0.002324376                                | 6.815662396                   | 0.002108101                                     | 0.007381444                  |
| 0.789744572                         | 0.000829659                                | 7.899924127                   | 0.000567956                                     | 0.002994466                  |
| 0.746440002                         | 0.000856917                                | 6.570375265                   | 0.000727533                                     | 0.001327467                  |
| 0.739682226                         | 0.002135009                                | 6.957298477                   | 0.001822512                                     | 0.003829086                  |
| 0.725781382                         | 0.002783826                                | 6.581705074                   | 0.002480133                                     | 0.006289269                  |
| 0.753277239                         | 0.001205247                                | 6.950526485                   | 0.001019912                                     | 0.002135106                  |
| 0.695514476                         | 0.002566857                                | 6.470912173                   | 0.002210449                                     | 0.00328164                   |
| 0.74938858                          | 0.001190993                                | 6.965199767                   | 0.001081866                                     | 0.004359317                  |
| 0.770915083                         | 0.002347893                                | 7.57230642                    | 0.001589359                                     | 0.004540982                  |
| 0.793742084                         | 0.002305943                                | 7.437712097                   | 0.002209002                                     | 0.011440812                  |
| 0.770767741                         | 0.001046146                                | 7.167182992                   | 0.000982014                                     | 0.004895465                  |
| 0.652973906                         | 0.009600919                                | 6.038301411                   | 0.008013724                                     | 0.007570636                  |
| 0.72827321                          | 0.002187813                                | 6.597819216                   | 0.00194605                                      | 0.004992687                  |
| 0.784454836                         | 0.0018028                                  | 7.32848991                    | 0.001724027                                     | 0.006373977                  |
| 0.795105661                         | 0.00147824                                 | 6.964038625                   | 0.001381098                                     | 0.004477496                  |
| 0.720063564                         | 0.002180418                                | 6.518274132                   | 0.001984123                                     | 0.004862327                  |
| 0.715134289                         | 0.002459893                                | 6.526152602                   | 0.00210281                                      | 0.002476913                  |
| 0.676778504                         | 0.002596126                                | 6.548568231                   | 0.00143353                                      | 0.002546747                  |
| 0.802508127                         | 0.001923304                                | 7.685416685                   | 0.001838301                                     | 0.007287247                  |
| 0.695921797                         | 0.006369112                                | 6.075346706                   | 0.003459891                                     | 0.005329638                  |
| 0.80747109                          | 0.001671889                                | 7.167686686                   | 0.001589428                                     | 0.004326383                  |
| 0.709765137                         | 0.002325127                                | 6.654177534                   | 0.002039229                                     | 0.002919014                  |
| 0.721164049                         | 0.003378906                                | 6.398050931                   | 0.002949033                                     | 0.005042389                  |
| 0.658184677                         | 0.003578309                                | 6.096552653                   | 0.003010618                                     | 0.003674639                  |
| 0.723010165                         | 0.003629414                                | 6.272958366                   | 0.003451444                                     | 0.006207408                  |
| 0.797088633                         | 0.001864173                                | 7.342583199                   | 0.001526896                                     | 0.005786842                  |
| 0.768672558                         | 0.000839949                                | 7.201527055                   | 0.000750603                                     | 0.002217975                  |
| 0.772253857                         | 0.001110017                                | 7.457605202                   | 0.000906908                                     | 0.004275889                  |
| 0.732832443                         | 0.003151496                                | 6.581370165                   | 0.002796428                                     | 0.001810334                  |
| 0.76668383                          | 0.001081647                                | 6.930356294                   | 0.000970652                                     | 0.002643158                  |
| 0.695760463                         | 0.002096787                                | 6.325017884                   | 0.001735548                                     | 0.002540229                  |
| 0.746685982                         | 0.003128394                                | 6.326576604                   | 0.002915018                                     | 0.00700443                   |
| 0.643800426                         | 0.006854254                                | 6.063193366                   | 0.003538021                                     | 0.008729057                  |
| 0.777801673                         | 0.000656503                                | 7.883965003                   | 0.000597422                                     | 0.003240865                  |

| wavelet.LLH_ngtdm_Complexity | wavelet.LLH_ngtdm_Strength | wavelet.LLH_ngtdm_Busyness | wavelet.LLH_ngtdm_Contrast | wavelet.HLH_gldm_GrayLevelVariance | wavelet.HLH_gldm_HighGrayLevelEmphasis |
|------------------------------|----------------------------|----------------------------|----------------------------|------------------------------------|----------------------------------------|
| 12.39759345                  | 17.57999369                | 0.028454445                | 0.000129449                | 37.14894721                        | 685.0697455                            |
| 15.35959444                  | 30.28300158                | 0.014415081                | 0.000296579                | 32.9010495                         | 565.1037433                            |
| 6.514025387                  | 11.43583541                | 0.051349705                | 0.0001852                  | 17.48901305                        | 408.878484                             |
| 3.297143625                  | 5.346320093                | 0.070106755                | 0.000167173                | 13.42491009                        | 195.9651996                            |
| 2.032725706                  | 3.981581328                | 0.115923922                | 4.92E-05                   | 14.27209357                        | 353.7153716                            |
| 15.76424097                  | 16.45125621                | 0.023831009                | 0.00052412                 | 35.90219467                        | 923.0393939                            |
| 4.846645242                  | 10.15643089                | 0.062061135                | 5.73E-05                   | 23.63029293                        | 742.6027252                            |
| 1.311586928                  | 2.852374322                | 0.174612406                | 1.58E-05                   | 14.78422791                        | 814.1967502                            |
| 1.406188209                  | 2.704535047                | 0.171485901                | 2.09E-05                   | 19.58345032                        | 524.1816982                            |
| 1.692510726                  | 3.005822619                | 0.154395386                | 0.000142967                | 10.62445701                        | 164.9216418                            |
| 4.490932112                  | 13.64393935                | 0.04905251                 | 0.000120163                | 7.925567618                        | 167.6763926                            |
| 2.397574136                  | 3.682842551                | 0.109050447                | 5.98E-05                   | 19.44749441                        | 365.1331887                            |
| 0.829911273                  | 2.859844797                | 0.172867879                | 2.74E-05                   | 7.510659729                        | 218.1569363                            |
| 4.521400352                  | 7.23062248                 | 0.0569433                  | 0.00010347                 | 23.27442557                        | 445.2574257                            |
| 2.100771565                  | 4.835910756                | 0.107458391                | 3.70E-05                   | 17.67442666                        | 478.5816532                            |
| 8.467000582                  | 28.56769161                | 0.035459939                | 0.83E-05                   | 18.06051952                        | 417.8137569                            |
| 5.842376339                  | 9.165135671                | 0.061493114                | 0.000237604                | 16.61445208                        | 517.2269682                            |
| 3.061012747                  | 7.984311051                | 0.054067656                | 8.58E-05                   | 7.838482025                        | 377.8937551                            |
| 2.24793989                   | 3.500503968                | 0.169973001                | 0.000141291                | 22.00945214                        | 331.6664099                            |
| 0.953347801                  | 2.492457722                | 0.299322801                | 1.50E-05                   | 14.86700732                        | 394.8882477                            |
| 0.838123911                  | 2.376210336                | 0.211512949                | 2.35E-05                   | 8.99857883                         | 274.2876984                            |
| 3.821923269                  | 6.5831005                  | 0.072338771                | 0.000126294                | 17.33510845                        | 384.4179796                            |
| 2.924472103                  | 5.098106719                | 0.086608451                | 0.000162126                | 18.25192928                        | 360.6826172                            |
| 3.363950824                  | 7.193908404                | 0.067800585                | 4.74E-05                   | 23.05994612                        | 411.4491878                            |
| 0.750509036                  | 2.023059154                | 0.246912125                | 5.95E-05                   | 8.951945939                        | 162.5522388                            |
| 4.241727658                  | 6.914715259                | 0.065023963                | 7.29E-05                   | 19.13923745                        | 295.6614605                            |
| 13.72555239                  | 27.31639611                | 0.023009668                | 0.000139657                | 32.83437322                        | 641.1364058                            |
| 1.097112028                  | 2.288418939                | 0.182484245                | 3.75E-05                   | 12.12408863                        | 658.7784214                            |
| 18.53725767                  | 25.12615334                | 0.019864337                | 0.000774226                | 14.14335691                        | 144.3176734                            |
| 3.01654897                   | 5.933124289                | 0.07919495                 | 6.46E-05                   | 19.25693638                        | 618.0764362                            |
| 1.64592445                   | 4.044052104                | 0.124574217                | 1.57E-05                   | 15.20236253                        | 434.9699454                            |
| 9.22003379                   | 33.00713317                | 0.01783942                 | 0.000172862                | 24.0347284                         | 377.0169164                            |
| 16.41655672                  | 53.70241285                | 0.012620426                | 0.000180484                | 36.51923279                        | 586.9876123                            |
| 12.85868604                  | 41.93902959                | 0.024128676                | 0.000231419                | 25.54149679                        | 422.5174468                            |
| 1.736440425                  | 2.743932891                | 0.182190118                | 2.43E-05                   | 14.46114892                        | 576.9352861                            |
| 0.987670276                  | 2.326986519                | 0.198217782                | 2.77E-05                   | 15.15518777                        | 398.1997332                            |
| 1.274183453                  | 3.288162081                | 0.161030905                | 1.74E-05                   | 11.0669695                         | 473.1494222                            |
| 0.095415927                  | 33.46763548                | 0.024854469                | 8.27E-05                   | 31.11916941                        | 695.3222444                            |
| 7.414875011                  | 13.39514347                | 0.038401876                | 0.000220969                | 18.68025911                        | 349.6243902                            |
| 6.470853984                  | 23.82158002                | 0.029717185                | 3.91E-05                   | 23.7262134                         | 857.5931224                            |
| 2.239113624                  | 4.531397095                | 0.107383013                | 4.02E-05                   | 11.26390003                        | 390.4471858                            |
| 1.114645639                  | 1.323136582                | 0.368647866                | 5.18E-05                   | 15.5004763                         | 322.6245151                            |
| 2.512610321                  | 4.36270009                 | 0.121359586                | 2.67E-05                   | 9.853026537                        | 389.1587736                            |
| 17.6749526                   | 36.0087493                 | 0.020581729                | 0.000197446                | 32.3662771                         | 559.8512862                            |
| 26.08043833                  | 77.18854257                | 0.007363502                | 0.000459649                | 32.4642377                         | 394.3568075                            |
| 8.123278591                  | 31.88016346                | 0.030126067                | 0.000172597                | 24.88702506                        | 459.0590164                            |
| 2.497840362                  | 4.125206937                | 0.097014644                | 3.01E-05                   | 29.404388                          | 1222.09075                             |
| 1.391784319                  | 2.223589259                | 0.196820912                | 0.0001501                  | 12.09614561                        | 284.2514351                            |
| 3.801021778                  | 4.988142419                | 0.092295252                | 0.000203883                | 17.7393127                         | 359.0117509                            |
| 0.801424822                  | 1.93346429                 | 0.268588482                | 5.40E-05                   | 8.25230209                         | 116.4615385                            |
| 10.32660145                  | 22.1624372                 | 0.023729417                | 0.000186887                | 29.80742091                        | 798.6228104                            |
| 3.984996387                  | 5.037915815                | 0.07926397                 | 6.38E-05                   | 30.17825818                        | 668.5087511                            |
| 0.737402615                  | 1.278262699                | 0.363116836                | 2.40E-05                   | 12.93583305                        | 254.7548759                            |
| 7.583202444                  | 14.3961353                 | 0.030735062                | 0.000203118                | 13.42121452                        | 507.5570652                            |
| 3.231777246                  | 5.286062671                | 0.088014641                | 0.000108477                | 14.76287241                        | 253.8488722                            |
| 2.941083836                  | 4.461020644                | 0.108665326                | 0.000116939                | 24.70838264                        | 506.3420513                            |
| 7.060994102                  | 26.93888463                | 0.035136217                | 9.27E-05                   | 20.08011013                        | 373.2877627                            |
| 6.055529529                  | 11.2538319                 | 0.046193665                | 0.000115411                | 34.27094062                        | 568.4181608                            |
| 6.324720453                  | 9.144972915                | 0.05557763                 | 0.000132852                | 22.13580708                        | 571.5091019                            |
| 1.341248273                  | 2.305993116                | 0.227512658                | 1.15E-05                   | 20.9397326                         | 664.5948078                            |
| 8.32383273                   | 11.14643283                | 0.052194933                | 0.000232995                | 33.54416825                        | 610.6862967                            |
| 1.232430359                  | 2.123214549                | 0.212227853                | 4.86E-05                   | 15.68627979                        | 396.7400749                            |
| 5.424482296                  | 18.53250184                | 0.044317114                | 1.96E-05                   | 16.5483236                         | 455.3599931                            |
| 2.831407341                  | 7.160044373                | 0.089193187                | 5.05E-05                   | 24.08294048                        | 537.527745                             |
| 1.932650345                  | 3.933835332                | 0.143464037                | 0.000173741                | 10.11282807                        | 283.0734177                            |
| 2.015196074                  | 3.66049993                 | 0.120842856                | 3.46E-05                   | 23.0070776                         | 566.98348                              |
| 7.802797465                  | 13.19189295                | 0.039125238                | 0.000244509                | 29.66101413                        | 536.1526074                            |
| 7.190192968                  | 21.69954561                | 0.044768188                | 7.36E-05                   | 32.63946519                        | 931.47824                              |
| 1.547323149                  | 2.525519333                | 0.180821751                | 2.03E-05                   | 17.90829982                        | 522.0131467                            |
| 3.114806678                  | 6.87980445                 | 0.084723444                | 7.14E-05                   | 16.51960361                        | 215.7891649                            |
| 4.041508896                  | 6.502128343                | 0.06995761                 | 0.000159674                | 30.35411974                        | 686.4080062                            |
| 2.523439497                  | 3.951361936                | 0.11961252                 | 5.52E-05                   | 27.5776515                         | 763.8713287                            |
| 1.551748446                  | 3.149177836                | 0.148173027                | 4.28E-05                   | 19.01056696                        | 282.053971                             |
| 5.993477992                  | 11.80695771                | 0.043795971                | 9.87E-05                   | 23.28579774                        | 617.1863656                            |
| 8.179639285                  | 29.45424394                | 0.05267261                 | 0.000131114                | 21.04057069                        | 537.4084957                            |
| 20.9360598                   | 50.25975155                | 0.01404363                 | 0.000395409                | 32.20355543                        | 583.7183308                            |
| 8.282629691                  | 19.72983749                | 0.024574062                | 0.000112165                | 44.76602821                        | 1466.805092                            |
| 1.10094484                   | 2.933878669                | 0.194064276                | 7.96E-05                   | 10.16665831                        | 350.7964509                            |
| 3.498581374                  | 5.766599476                | 0.07466492                 | 9.98E-05                   | 17.17173951                        | 288.1376684                            |
| 8.30267868                   | 22.80779758                | 0.02828362                 | 0.000142107                | 21.34615726                        | 494.5528003                            |
| 12.92473313                  | 18.32358649                | 0.027498115                | 0.000143607                | 38.20866703                        | 687.9331322                            |
| 2.225829657                  | 5.971793942                | 0.069465318                | 5.08E-05                   | 13.919222                          | 354.2078933                            |
| 1.207288378                  | 3.175453054                | 0.168485047                | 2.34E-05                   | 18.72730652                        | 436.9917406                            |
| 1.172823842                  | 2.450005784                | 0.222663077                | 3.17E-05                   | 9.722572622                        | 282.968077                             |
| 14.78203891                  | 47.24092265                | 0.012518323                | 0.000248842                | 32.39164856                        | 462.0315703                            |
| 0.624875726                  | 3.596659004                | 0.169006021                | 3.01E-05                   | 1.946411711                        | 91.6886423                             |
| 11.1740151                   | 14.84355147                | 0.0378257                  | 0.000168923                | 25.75166313                        | 672.6167715                            |
| 1.907571878                  | 3.950814674                | 0.127787351                | 4.14E-05                   | 13.26370993                        | 470.1816193                            |
| 3.160230954                  | 5.5128194                  | 0.091577898                | 9.23E-05                   | 18.62296902                        | 662.9296448                            |
| 0.596635998                  | 2.116130703                | 0.216853275                | 2.40E-05                   | 8.83037708                         | 220.7362963                            |
| 2.809204626                  | 8.074411589                | 0.053134571                | 7.60E-05                   | 6.145864894                        | 160.2369632                            |
| 9.130365238                  | 18.67581558                | 0.050420112                | 0.000215457                | 32.46648651                        | 569.7057095                            |
| 3.500375581                  | 7.899215819                | 0.06535765                 | 4.33E-05                   | 25.95469963                        | 633.511094                             |
| 7.333650007                  | 17.57098937                | 0.032139516                | 0.000109481                | 18.44227732                        | 237.8412121                            |
| 2.120729051                  | 1.805969399                | 0.280504374                | 4.43E-05                   | 17.50174568                        | 326.0319393                            |
| 3.950888551                  | 7.070681492                | 0.070618638                | 5.26E-05                   | 30.61295547                        | 948.4798364                            |
| 0.984368628                  | 1.885275742                | 0.226107418                | 3.36E-05                   | 10.77887853                        | 192.8324459                            |
| 4.848118331                  | 7.656376171                | 0.053678587                | 0.000147999                | 15.86138227                        | 433.3161414                            |
| 1.44716998                   | 3.403820695                | 0.12864344                 | 0.000112652                | 6.43920547                         | 117.0167866                            |
| 6.612146277                  | 23.2170113                 | 0.030462997                | 7.46E-05                   | 28.40658715                        | 689.0051957                            |



| wavelet.HLH_gldm_GrayLevelNonUniformityNormalized | wavelet.HLH_gldm_DependenceEntropy | wavelet.HLH_gldm_DependenceNonUniformity | wavelet.HLH_gldm_GrayLevelNonUniformity |
|---------------------------------------------------|------------------------------------|------------------------------------------|-----------------------------------------|
| 0.053333819                                       | 6.423347989                        | 600.2902922                              | 113.1743638                             |
| 0.068196403                                       | 6.349527234                        | 203.2887701                              | 63.76363636                             |
| 0.0755717                                         | 6.363689606                        | 295.2007823                              | 115.9269883                             |
| 0.099277235                                       | 6.034550415                        | 169.517912                               | 96.99385875                             |
| 0.086443615                                       | 6.035694251                        | 492.6765203                              | 204.6984797                             |
| 0.057681359                                       | 6.261395693                        | 177.3575758                              | 38.06969697                             |
| 0.06185994                                        | 6.562196028                        | 1260.825872                              | 349.5705185                             |
| 0.095062469                                       | 6.20592628                         | 905.5700861                              | 485.5790916                             |
| 0.07827044                                        | 6.285045207                        | 955.9929608                              | 355.8174219                             |
| 0.094045862                                       | 5.896527644                        | 222.7462687                              | 100.8171642                             |
| 0.111582612                                       | 6.063250658                        | 233.7519894                              | 168.2665782                             |
| 0.076748933                                       | 6.188203049                        | 516.8750542                              | 176.9062907                             |
| 0.14462191                                        | 5.881959212                        | 234.4151044                              | 270.0091055                             |
| 0.073046981                                       | 6.287356793                        | 368.8509027                              | 125.4216657                             |
| 0.086931846                                       | 6.145981668                        | 391.7530242                              | 172.4727823                             |
| 0.083519693                                       | 6.542971934                        | 744.3395795                              | 365.4821755                             |
| 0.075459654                                       | 6.056894194                        | 278.2881072                              | 90.09882747                             |
| 0.129818081                                       | 5.923067102                        | 173.9716139                              | 160.0656934                             |
| 0.071348359                                       | 6.251929452                        | 294.3420647                              | 92.61016949                             |
| 0.090994573                                       | 6.171115786                        | 975.3973841                              | 473.0807848                             |
| 0.12182391                                        | 6.112444008                        | 424.3842593                              | 368.3955026                             |
| 0.077026148                                       | 6.074511802                        | 247.6079703                              | 83.11121409                             |
| 0.071783066                                       | 6.074016388                        | 241.0039063                              | 73.50585938                             |
| 0.069702334                                       | 6.423060194                        | 587.8432187                              | 184.5020778                             |
| 0.10388151                                        | 5.89059044                         | 226.4941084                              | 132.2411626                             |
| 0.07744842                                        | 6.236094178                        | 512.3279865                              | 183.475306                              |
| 0.054256919                                       | 6.596445568                        | 794.848438                               | 175.4126199                             |
| 0.09698928                                        | 6.088854285                        | 502.5503259                              | 267.8834178                             |
| 0.079260694                                       | 5.86104639                         | 105.4966443                              | 35.4295302                              |
| 0.080111574                                       | 6.215617973                        | 425.9717624                              | 164.5491723                             |
| 0.102807228                                       | 6.215364033                        | 776.0399327                              | 489.1567886                             |
| 0.065435328                                       | 6.462969883                        | 454.2160644                              | 135.3856936                             |
| 0.052138501                                       | 6.708868688                        | 780.633323                               | 168.3552183                             |
| 0.059959801                                       | 6.427782107                        | 576.7676596                              | 140.9055319                             |
| 0.069693887                                       | 6.395762052                        | 992.475931                               | 306.9318801                             |
| 0.105618289                                       | 6.257343709                        | 458.9093031                              | 316.7492497                             |
| 0.118875336                                       | 6.096957274                        | 532.9435636                              | 442.335125                              |
| 0.068145682                                       | 6.789239166                        | 965.3286185                              | 351.6998644                             |
| 0.072505784                                       | 6.104058291                        | 297.195122                               | 89.18211382                             |
| 0.074183857                                       | 6.537951073                        | 1448.831087                              | 539.3166437                             |
| 0.113605979                                       | 6.046928649                        | 401.0115652                              | 294.693909                              |
| 0.078015866                                       | 6.098564561                        | 888.9182829                              | 301.6873545                             |
| 0.10507779                                        | 6.002608693                        | 638.5203942                              | 383.8491651                             |
| 0.050600761                                       | 6.423997728                        | 694.4244373                              | 125.8946945                             |
| 0.055313099                                       | 6.449157221                        | 330.1909233                              | 70.69014085                             |
| 0.064781072                                       | 6.544247863                        | 577.7744991                              | 177.8240437                             |
| 0.073466051                                       | 6.356638818                        | 985.8890837                              | 335.1521263                             |
| 0.095213678                                       | 5.923598075                        | 170.8277842                              | 82.93111366                             |
| 0.081020324                                       | 6.074071829                        | 184.9811986                              | 68.94829612                             |
| 0.115222681                                       | 5.811156736                        | 228.4926036                              | 155.7810651                             |
| 0.056511592                                       | 6.632949472                        | 575.2039704                              | 145.1782795                             |
| 0.054836914                                       | 6.322724942                        | 975.1097597                              | 184.8552358                             |
| 0.086924034                                       | 6.04264714                         | 947.9618794                              | 392.2012411                             |
| 0.100148012                                       | 6.094134004                        | 184.759058                               | 110.5634058                             |
| 0.083609023                                       | 6.052643123                        | 275.8857143                              | 111.2                                   |
| 0.06322998                                        | 6.327418766                        | 478.4                                    | 123.2984615                             |
| 0.073639113                                       | 6.408508292                        | 856.1075402                              | 297.8702101                             |
| 0.053679434                                       | 6.685275349                        | 798.7854251                              | 185.6234818                             |
| 0.070615898                                       | 6.204789019                        | 397.5946602                              | 116.375                                 |
| 0.07552085                                        | 6.445234891                        | 1906.35809                               | 689.429839                              |
| 0.05227533                                        | 6.395104638                        | 488.7338618                              | 92.3182333                              |
| 0.081870695                                       | 6.108778972                        | 562.4838951                              | 218.5947566                             |
| 0.08057666                                        | 6.384882447                        | 1114.443773                              | 466.458283                              |
| 0.063963014                                       | 6.392030209                        | 1841.849797                              | 487.5900564                             |
| 0.126649575                                       | 5.871263325                        | 115.5037975                              | 100.0531646                             |
| 0.075097465                                       | 6.385342569                        | 780.527188                               | 290.0264112                             |
| 0.055133567                                       | 6.381123388                        | 340.2101227                              | 71.89417178                             |
| 0.058501222                                       | 6.526170915                        | 1552.1856                                | 365.63264                               |
| 0.077606873                                       | 6.198524216                        | 1337.568892                              | 454.5434523                             |
| 0.072446622                                       | 6.347687543                        | 608.4679089                              | 209.9503106                             |
| 0.067104974                                       | 6.365932846                        | 307.2771363                              | 87.16936105                             |
| 0.065968453                                       | 6.463643369                        | 949.0307692                              | 283.004662                              |
| 0.106300713                                       | 6.06936579                         | 381.4475647                              | 242.2593243                             |
| 0.06766089                                        | 6.263643318                        | 543.940239                               | 152.8459495                             |
| 0.076728006                                       | 6.599823549                        | 557.0306611                              | 240.2353881                             |
| 0.060184435                                       | 6.364806888                        | 332.7108793                              | 80.76751118                             |
| 0.070811536                                       | 6.496637057                        | 522.4524207                              | 169.6644407                             |
| 0.116101743                                       | 5.925993551                        | 152.1294363                              | 111.2254697                             |
| 0.075421547                                       | 6.140471683                        | 392.4036321                              | 128.7445811                             |
| 0.065467405                                       | 6.283248051                        | 565.1607525                              | 153.1282599                             |
| 0.05276962                                        | 6.390024999                        | 586.8119658                              | 104.9587733                             |
| 0.101284421                                       | 6.194643937                        | 294.9210673                              | 182.2106726                             |
| 0.085392867                                       | 6.329666618                        | 630.9345366                              | 279.1492811                             |
| 0.096155604                                       | 5.965285076                        | 595.6169867                              | 295.4861699                             |
| 0.051137211                                       | 6.678884156                        | 575.8241082                              | 124.7236572                             |
| 0.238795172                                       | 5.548751717                        | 132.9321149                              | 365.8342037                             |
| 0.059656044                                       | 6.431902465                        | 578.1991614                              | 142.2796646                             |
| 0.098754762                                       | 6.133343164                        | 480.9832239                              | 270.785558                              |
| 0.081747925                                       | 6.200163557                        | 299.3142077                              | 119.6789617                             |
| 0.124031581                                       | 5.917731795                        | 310.9407407                              | 251.1639506                             |
| 0.140603241                                       | 5.827125896                        | 170.6503067                              | 183.3466258                             |
| 0.057108978                                       | 6.481433013                        | 609.7380353                              | 136.0335852                             |
| 0.061499644                                       | 6.433757218                        | 1250.120587                              | 318.7526529                             |
| 0.070201286                                       | 6.305000269                        | 733.2860606                              | 231.6642424                             |
| 0.073594671                                       | 6.190088492                        | 1004.011949                              | 320.2840074                             |
| 0.060698454                                       | 6.529452491                        | 821.9444769                              | 207.710111                              |
| 0.100406037                                       | 6.056634041                        | 509.1093362                              | 282.8438055                             |
| 0.105721628                                       | 6.112599821                        | 177.0916905                              | 110.6905444                             |
| 0.133450074                                       | 5.755031732                        | 122.5947242                              | 111.2973621                             |
| 0.067185665                                       | 6.645807783                        | 1184.613093                              | 387.9300312                             |

| wavelet.HLH_gldm_SmallDependenceEmphasis | wavelet.HLH_gldm_DependenceNonUniformityNormalized | wavelet.HLH_gldm_DependenceVariance | wavelet.HLH_gldm_LargeDependenceEmphasis |
|------------------------------------------|----------------------------------------------------|-------------------------------------|------------------------------------------|
| 0.487741799                              | 0.282888922                                        | 1.643270402                         | 6.232799246                              |
| 0.413562202                              | 0.217421144                                        | 2.743488232                         | 9.536898396                              |
| 0.346589873                              | 0.19243858                                         | 3.604252332                         | 12.14863103                              |
| 0.319351745                              | 0.17350861                                         | 4.411283471                         | 14.60286592                              |
| 0.351351248                              | 0.208055963                                        | 2.392200055                         | 9.751689189                              |
| 0.483718185                              | 0.2687236                                          | 1.672121212                         | 6.512121212                              |
| 0.386071316                              | 0.223115532                                        | 2.869848597                         | 9.685542382                              |
| 0.341512706                              | 0.177284668                                        | 4.189156966                         | 13.74001566                              |
| 0.386568473                              | 0.210293216                                        | 3.26238583                          | 10.63792345                              |
| 0.35110571                               | 0.207785698                                        | 2.370012113                         | 9.73880597                               |
| 0.271166194                              | 0.155007951                                        | 4.140657431                         | 16.0862069                               |
| 0.408959812                              | 0.224240804                                        | 2.431327539                         | 8.892407809                              |
| 0.235278965                              | 0.125557099                                        | 6.298585445                         | 22.98714515                              |
| 0.40037106                               | 0.21482289                                         | 2.804120228                         | 9.761793826                              |
| 0.36125379                               | 0.197456161                                        | 3.133844953                         | 11.10080645                              |
| 0.318198959                              | 0.170095882                                        | 4.439154362                         | 14.74771481                              |
| 0.400214332                              | 0.233072117                                        | 1.837173023                         | 7.842546064                              |
| 0.247172732                              | 0.141096199                                        | 5.955162472                         | 20.38037307                              |
| 0.396452829                              | 0.226765843                                        | 2.496950387                         | 9.00770416                               |
| 0.341054316                              | 0.187612499                                        | 3.358514911                         | 12.01788806                              |
| 0.256943627                              | 0.14033871                                         | 6.242896335                         | 20.6547619                               |
| 0.385357276                              | 0.22947912                                         | 2.119775888                         | 8.479147359                              |
| 0.394152615                              | 0.235355377                                        | 1.85931015                          | 7.88671875                               |
| 0.404191917                              | 0.22207904                                         | 3.086205324                         | 9.954287873                              |
| 0.295055482                              | 0.177921531                                        | 3.4578869                           | 13.22780833                              |
| 0.403439985                              | 0.216263397                                        | 2.677002317                         | 9.506542845                              |
| 0.433942868                              | 0.24585476                                         | 2.088118497                         | 7.723785957                              |
| 0.326101337                              | 0.181951602                                        | 3.525063694                         | 12.67776973                              |
| 0.404820002                              | 0.23601039                                         | 1.77613621                          | 7.711409396                              |
| 0.372948844                              | 0.207386447                                        | 2.794525418                         | 10.16942551                              |
| 0.317291293                              | 0.16310213                                         | 4.800195631                         | 15.71878941                              |
| 0.37819645                               | 0.219534097                                        | 2.397377943                         | 9.186563557                              |
| 0.436849007                              | 0.241756991                                        | 2.238715589                         | 8.01269743                               |
| 0.423211121                              | 0.245433047                                        | 2.034821186                         | 7.754042553                              |
| 0.41736109                               | 0.225357841                                        | 2.70434173                          | 9.229791099                              |
| 0.310964281                              | 0.153020775                                        | 5.650394524                         | 17.84094698                              |
| 0.276901634                              | 0.143225897                                        | 5.122203989                         | 18.36898683                              |
| 0.36798998                               | 0.187042941                                        | 4.963723612                         | 14.20480527                              |
| 0.404114041                              | 0.24162205                                         | 1.858692577                         | 7.681300813                              |
| 0.36757815                               | 0.199289008                                        | 3.459729627                         | 11.44676754                              |
| 0.285199777                              | 0.154591968                                        | 4.467035309                         | 16.26522745                              |
| 0.397732406                              | 0.229872843                                        | 2.070462078                         | 8.278510473                              |
| 0.316111565                              | 0.174793428                                        | 3.56158523                          | 13.19655078                              |
| 0.473230939                              | 0.279109501                                        | 1.310834126                         | 5.838424437                              |
| 0.454837312                              | 0.258365355                                        | 1.749143444                         | 6.89827856                               |
| 0.371631153                              | 0.210482513                                        | 2.524420821                         | 9.672495446                              |
| 0.397065548                              | 0.216108962                                        | 2.62835201                          | 9.464708461                              |
| 0.344571061                              | 0.19612834                                         | 3.396159712                         | 11.70723307                              |
| 0.405061384                              | 0.217369211                                        | 2.992550411                         | 9.902467685                              |
| 0.310883849                              | 0.169003405                                        | 3.769607157                         | 13.90384615                              |
| 0.404069414                              | 0.223901896                                        | 2.326381213                         | 8.76956014                               |
| 0.488727698                              | 0.289264242                                        | 1.366607234                         | 5.726787303                              |
| 0.360087207                              | 0.210097934                                        | 2.492004772                         | 9.750443262                              |
| 0.331504366                              | 0.167354219                                        | 4.167795631                         | 14.47282609                              |
| 0.368736695                              | 0.207432868                                        | 3.437969359                         | 11.19398496                              |
| 0.429811522                              | 0.245333333                                        | 1.917001972                         | 7.53025641                               |
| 0.381773824                              | 0.211645869                                        | 3.150868795                         | 10.49369592                              |
| 0.390121573                              | 0.230996364                                        | 2.072440634                         | 8.32388664                               |
| 0.416655158                              | 0.241258896                                        | 2.312810762                         | 8.30461165                               |
| 0.390629929                              | 0.208824416                                        | 4.310044797                         | 12.23233651                              |
| 0.465989952                              | 0.276746241                                        | 1.25446428                          | 5.816534541                              |
| 0.377957945                              | 0.210668126                                        | 2.410055408                         | 9.449438202                              |
| 0.351040661                              | 0.192510584                                        | 3.234368253                         | 11.53342546                              |
| 0.420273642                              | 0.241617447                                        | 1.874965172                         | 7.579561852                              |
| 0.282339944                              | 0.146207339                                        | 5.078474603                         | 18.02025316                              |
| 0.379509258                              | 0.202104399                                        | 3.138461543                         | 10.81460383                              |
| 0.442819717                              | 0.260897333                                        | 1.570926173                         | 6.647239264                              |
| 0.438065964                              | 0.248349696                                        | 2.086489498                         | 7.6576                                   |
| 0.418040087                              | 0.228370991                                        | 2.280358271                         | 8.501792727                              |
| 0.35899658                               | 0.209961321                                        | 2.646941014                         | 9.999309869                              |
| 0.435388002                              | 0.236548989                                        | 2.702355872                         | 8.86605808                               |
| 0.409529979                              | 0.221219294                                        | 2.556354508                         | 9.15011655                               |
| 0.308214434                              | 0.167374974                                        | 4.202693151                         | 14.66915314                              |
| 0.421407797                              | 0.240788065                                        | 2.039457732                         | 7.832226649                              |
| 0.325967191                              | 0.177908228                                        | 4.125856548                         | 13.76141808                              |
| 0.441962771                              | 0.247921669                                        | 1.940067653                         | 7.442622951                              |
| 0.412255703                              | 0.218051929                                        | 3.16355654                          | 10.13439065                              |
| 0.280257587                              | 0.158798994                                        | 4.642287124                         | 16.33611691                              |
| 0.39689203                               | 0.229879105                                        | 2.36657356                          | 8.738722906                              |
| 0.420599171                              | 0.241624948                                        | 1.937910271                         | 7.672082086                              |
| 0.508001682                              | 0.29502864                                         | 1.513684743                         | 5.806435395                              |
| 0.330970893                              | 0.163936113                                        | 5.222991836                         | 16.17287382                              |
| 0.37364787                               | 0.193005365                                        | 4.206726125                         | 12.76445396                              |
| 0.32555252                               | 0.193822645                                        | 3.017205479                         | 11.45232672                              |
| 0.409955262                              | 0.236090245                                        | 1.928816631                         | 7.842148421                              |
| 0.11543023                               | 0.08677031                                         | 11.19651269                         | 47.49477807                              |
| 0.421698716                              | 0.242431514                                        | 1.978083497                         | 7.711949686                              |
| 0.333336364                              | 0.175413284                                        | 4.293524136                         | 14.06199854                              |
| 0.380705485                              | 0.204449595                                        | 3.604183463                         | 11.41666667                              |
| 0.280107424                              | 0.153550983                                        | 4.86906118                          | 17.02074074                              |
| 0.239142789                              | 0.1308668                                          | 5.776758158                         | 21.54447853                              |
| 0.450305792                              | 0.255977345                                        | 1.696992064                         | 6.878253568                              |
| 0.418166112                              | 0.241196332                                        | 1.965009311                         | 7.73796643                               |
| 0.357653414                              | 0.222207897                                        | 1.917534986                         | 8.611515152                              |
| 0.399820844                              | 0.230701275                                        | 2.040579509                         | 8.201286765                              |
| 0.436841596                              | 0.240194178                                        | 2.40858426                          | 8.328462887                              |
| 0.325285909                              | 0.180727489                                        | 3.833512213                         | 13.21228257                              |
| 0.325016958                              | 0.169142016                                        | 5.47680415                          | 16.34097421                              |
| 0.246765004                              | 0.146996072                                        | 4.725612316                         | 18.0647482                               |
| 0.386066094                              | 0.205163334                                        | 3.546590913                         | 11.26948389                              |

| wavelet.HLH_gldm_LargeDependenceLowGrayLevelEmphasis | wavelet.HLH_gldm_SmallDependenceHighGrayLevelEmphasis | wavelet.HLH_gldm_LargeDependenceHighGrayLevelEmphasis |
|------------------------------------------------------|-------------------------------------------------------|-------------------------------------------------------|
| 0.011208972                                          | 343.0680508                                           | 4150.884072                                           |
| 0.023402047                                          | 233.7682581                                           | 5330.939037                                           |
| 0.034722473                                          | 152.7054618                                           | 4653.924381                                           |
| 0.113295132                                          | 70.59124235                                           | 2739.611054                                           |
| 0.031244862                                          | 134.5995181                                           | 3312.918919                                           |
| 0.009740025                                          | 444.9041985                                           | 6011.254545                                           |
| 0.014414141                                          | 295.1504836                                           | 7045.216068                                           |
| 0.017477274                                          | 281.5293629                                           | 11174.5507                                            |
| 0.022418019                                          | 211.5242738                                           | 5379.260889                                           |
| 0.071539515                                          | 61.26866094                                           | 1543.473881                                           |
| 0.107388511                                          | 46.20851071                                           | 2658.984085                                           |
| 0.028698808                                          | 158.8639082                                           | 3111.90282                                            |
| 0.11372589                                           | 56.74736424                                           | 4816.905731                                           |
| 0.025314314                                          | 187.9039477                                           | 4176.350029                                           |
| 0.025482422                                          | 182.3452434                                           | 5212.912298                                           |
| 0.039384454                                          | 141.7248348                                           | 5964.177102                                           |
| 0.017547107                                          | 212.1677874                                           | 3962.938861                                           |
| 0.05575727                                           | 96.57926179                                           | 7729.890511                                           |
| 0.034053584                                          | 140.1928707                                           | 2833.614022                                           |
| 0.033559824                                          | 142.4995534                                           | 4609.6407                                             |
| 0.079348275                                          | 71.44176352                                           | 5711.998677                                           |
| 0.025454                                             | 149.5895557                                           | 3219.706209                                           |
| 0.026084199                                          | 147.8027783                                           | 2774.331055                                           |
| 0.028626001                                          | 172.5398439                                           | 3922.004533                                           |
| 0.093016336                                          | 50.50730579                                           | 2139.325216                                           |
| 0.041793962                                          | 127.3960877                                           | 2647.243563                                           |
| 0.014281309                                          | 280.3567949                                           | 4900.864213                                           |
| 0.020447817                                          | 222.9714333                                           | 8202.601014                                           |
| 0.077584781                                          | 58.18278369                                           | 1099.852349                                           |
| 0.018283564                                          | 237.4384022                                           | 6125.815482                                           |
| 0.039425652                                          | 145.2241506                                           | 6652.645019                                           |
| 0.029966395                                          | 153.4148161                                           | 3296.168197                                           |
| 0.01736967                                           | 267.9796144                                           | 4556.187984                                           |
| 0.022147729                                          | 180.0929862                                           | 3259.714043                                           |
| 0.018042149                                          | 250.484793                                            | 5178.363533                                           |
| 0.048478006                                          | 131.1154913                                           | 6926.921307                                           |
| 0.040722006                                          | 135.756748                                            | 8543.636926                                           |
| 0.023201567                                          | 262.1414851                                           | 9543.490409                                           |
| 0.026587863                                          | 146.3292592                                           | 2662.731707                                           |
| 0.014372508                                          | 325.5361064                                           | 9605.387345                                           |
| 0.044654702                                          | 118.8200931                                           | 6162.386276                                           |
| 0.030180355                                          | 133.8413206                                           | 2572.08663                                            |
| 0.036178222                                          | 128.1498142                                           | 5032.335341                                           |
| 0.013407709                                          | 264.7411422                                           | 3235.441318                                           |
| 0.024622422                                          | 195.4857771                                           | 2566.031299                                           |
| 0.025618223                                          | 181.0995668                                           | 4215.130419                                           |
| 0.008476062                                          | 498.5557628                                           | 11316.18501                                           |
| 0.047553072                                          | 108.9745498                                           | 3121.93915                                            |
| 0.033049997                                          | 157.5985601                                           | 3331.091657                                           |
| 0.141535424                                          | 39.20297928                                           | 1573.930473                                           |
| 0.012658558                                          | 329.1209552                                           | 6859.155313                                           |
| 0.010124798                                          | 333.6051082                                           | 3743.161376                                           |
| 0.04468319                                           | 96.17588967                                           | 2377.886968                                           |
| 0.030218206                                          | 166.5415243                                           | 7401.964674                                           |
| 0.051068679                                          | 99.35158937                                           | 2727.346617                                           |
| 0.01726012                                           | 222.0908027                                           | 3803.086667                                           |
| 0.034141039                                          | 147.2163268                                           | 3829.01335                                            |
| 0.017975308                                          | 232.0234081                                           | 4552.711972                                           |
| 0.016657417                                          | 247.772082                                            | 4579.128034                                           |
| 0.019637727                                          | 265.2110097                                           | 7981.808741                                           |
| 0.016322369                                          | 292.3432822                                           | 3452.595696                                           |
| 0.026777046                                          | 156.1643144                                           | 3648.110861                                           |
| 0.028436182                                          | 166.0511858                                           | 5025.287442                                           |
| 0.01644717                                           | 233.7864264                                           | 3965.71586                                            |
| 0.069370154                                          | 85.42365929                                           | 4922.924051                                           |
| 0.021344681                                          | 226.9484326                                           | 5946.672967                                           |
| 0.016388415                                          | 256.4214984                                           | 3330.824387                                           |
| 0.009217978                                          | 414.1969859                                           | 7070.26448                                            |
| 0.018185576                                          | 226.2197663                                           | 4313.769677                                           |
| 0.06209689                                           | 83.47626104                                           | 2054.117667                                           |
| 0.020532662                                          | 308.6662039                                           | 5848.908391                                           |
| 0.017002949                                          | 318.7721783                                           | 6926.077389                                           |
| 0.056511951                                          | 91.50384868                                           | 4040.247916                                           |
| 0.014802114                                          | 272.3990417                                           | 4680.478088                                           |
| 0.028423244                                          | 181.6335229                                           | 7206.929416                                           |
| 0.021341744                                          | 274.8675923                                           | 4079.353204                                           |
| 0.007832452                                          | 632.9283305                                           | 14296.85434                                           |
| 0.050235973                                          | 102.9607598                                           | 5614.831942                                           |
| 0.036388339                                          | 119.391051                                            | 2419.986526                                           |
| 0.018252477                                          | 215.7099899                                           | 3670.881146                                           |
| 0.010586935                                          | 356.3883186                                           | 3877.915033                                           |
| 0.050158757                                          | 122.6599738                                           | 5529.70428                                            |
| 0.035112252                                          | 168.6475435                                           | 5448.600795                                           |
| 0.044801112                                          | 95.65512456                                           | 3135.715913                                           |
| 0.023589987                                          | 203.8396906                                           | 3351.565806                                           |
| 0.536079636                                          | 10.89129256                                           | 4316.870104                                           |
| 0.013258066                                          | 293.1054271                                           | 5046.608386                                           |
| 0.031812347                                          | 162.8052331                                           | 6501.005835                                           |
| 0.018934281                                          | 259.8711008                                           | 7439.655055                                           |
| 0.084155194                                          | 66.68514926                                           | 3613.592593                                           |
| 0.147213701                                          | 39.97025384                                           | 3362.347393                                           |
| 0.015233043                                          | 272.0519251                                           | 3711.782955                                           |
| 0.014021414                                          | 273.4563293                                           | 4728.11885                                            |
| 0.049224322                                          | 90.28220343                                           | 1956.466667                                           |
| 0.029546396                                          | 134.925295                                            | 2577.605928                                           |
| 0.009784665                                          | 427.5963064                                           | 7728.140269                                           |
| 0.081761901                                          | 65.94738495                                           | 2460.076322                                           |
| 0.041290732                                          | 143.0187711                                           | 6898.704871                                           |
| 0.176171713                                          | 30.28657751                                           | 2013.170264                                           |
| 0.019375779                                          | 281.5976207                                           | 7523.989955                                           |

| wavelet.HLH_gldm_SmallDependenceLowGrayLevelEmphasis | wavelet.HLH_gldm_LowGrayLevelEmphasis | wavelet.HLH_gldm_DistanceZoneVariabilityNormalized | wavelet.HLH_gldm_LowIntensityEmphasis |
|------------------------------------------------------|---------------------------------------|----------------------------------------------------|---------------------------------------|
| 0.001657338                                          | 0.002550593                           | 1                                                  | 0.003178393                           |
| 0.004110758                                          | 0.005576342                           | 1                                                  | 0.009204715                           |
| 0.001823019                                          | 0.00368889                            | 1                                                  | 0.004963862                           |
| 0.003940543                                          | 0.011096467                           | 1                                                  | 0.0139498                             |
| 0.001844293                                          | 0.003954102                           | 1                                                  | 0.005086364                           |
| 0.002296053                                          | 0.002948354                           | 1                                                  | 0.004298654                           |
| 0.000808111                                          | 0.001734303                           | 0.990569956                                        | 0.002025588                           |
| 0.000745989                                          | 0.001587657                           | 1                                                  | 0.002118282                           |
| 0.001311495                                          | 0.002608303                           | 1                                                  | 0.003260715                           |
| 0.004417224                                          | 0.009353186                           | 1                                                  | 0.012300965                           |
| 0.003761133                                          | 0.008821317                           | 1                                                  | 0.013350055                           |
| 0.002268059                                          | 0.004248653                           | 0.998111428                                        | 0.005386964                           |
| 0.002232083                                          | 0.006125195                           | 1                                                  | 0.009405404                           |
| 0.002020335                                          | 0.003592106                           | 1                                                  | 0.004859069                           |
| 0.00160228                                           | 0.003099646                           | 1                                                  | 0.004278246                           |
| 0.001567732                                          | 0.003465376                           | 1                                                  | 0.004761267                           |
| 0.001878086                                          | 0.00315746                            | 1                                                  | 0.004342495                           |
| 0.001621336                                          | 0.003732405                           | 1                                                  | 0.006346398                           |
| 0.003803212                                          | 0.006041392                           | 1                                                  | 0.008820598                           |
| 0.001607119                                          | 0.0034955                             | 0.997975711                                        | 0.0045834                             |
| 0.001917516                                          | 0.005106507                           | 1                                                  | 0.007637065                           |
| 0.002428247                                          | 0.004269816                           | 1                                                  | 0.005878387                           |
| 0.002597367                                          | 0.004579651                           | 1                                                  | 0.006124469                           |
| 0.001989507                                          | 0.003782434                           | 1                                                  | 0.004759817                           |
| 0.004613618                                          | 0.010111096                           | 1                                                  | 0.015479377                           |
| 0.005558967                                          | 0.008093669                           | 1                                                  | 0.012780239                           |
| 0.001535579                                          | 0.002583271                           | 1                                                  | 0.003359451                           |
| 0.000916371                                          | 0.002004111                           | 0.99800797                                         | 0.002703116                           |
| 0.009453567                                          | 0.015509043                           | 1                                                  | 0.02210493                            |
| 0.001404507                                          | 0.002510774                           | 1                                                  | 0.003524718                           |
| 0.001905543                                          | 0.003638276                           | 1                                                  | 0.005804599                           |
| 0.002296639                                          | 0.00437978                            | 0.995633209                                        | 0.005753284                           |
| 0.001665317                                          | 0.002917034                           | 0.998773759                                        | 0.003641912                           |
| 0.002243125                                          | 0.003902742                           | 1                                                  | 0.00500532                            |
| 0.001293305                                          | 0.002466574                           | 0.996148305                                        | 0.003014146                           |
| 0.001573324                                          | 0.003558102                           | 0.998023717                                        | 0.005007327                           |
| 0.001017196                                          | 0.002648742                           | 0.99626867                                         | 0.003664869                           |
| 0.001360402                                          | 0.002446621                           | 0.988018868                                        | 0.003521356                           |
| 0.00294894                                           | 0.005044324                           | 1                                                  | 0.006877359                           |
| 0.0007115                                            | 0.001512244                           | 1                                                  | 0.001870321                           |
| 0.001381976                                          | 0.00336913                            | 1                                                  | 0.004764336                           |
| 0.002425841                                          | 0.00462736                            | 0.997742667                                        | 0.005818337                           |
| 0.001318774                                          | 0.00321647                            | 1                                                  | 0.004078748                           |
| 0.002231072                                          | 0.003351634                           | 1                                                  | 0.0043526                             |
| 0.003103339                                          | 0.00511032                            | 1                                                  | 0.006525174                           |
| 0.001658216                                          | 0.00336017                            | 1                                                  | 0.00428391                            |
| 0.000710517                                          | 0.001235098                           | 1                                                  | 0.001686843                           |
| 0.002700545                                          | 0.005395188                           | 1                                                  | 0.00735207                            |
| 0.002743759                                          | 0.004717036                           | 1                                                  | 0.006387436                           |
| 0.01027719                                           | 0.017631555                           | 1                                                  | 0.032039394                           |
| 0.001031221                                          | 0.001876014                           | 1                                                  | 0.002399886                           |
| 0.001336482                                          | 0.002221375                           | 0.997903566                                        | 0.002614045                           |
| 0.002473381                                          | 0.005482506                           | 0.998918335                                        | 0.006704888                           |
| 0.001873554                                          | 0.003257015                           | 1                                                  | 0.005452003                           |
| 0.003663771                                          | 0.006590167                           | 1                                                  | 0.009435115                           |
| 0.001790664                                          | 0.003117901                           | 1                                                  | 0.003933077                           |
| 0.002292627                                          | 0.00461566                            | 0.995510685                                        | 0.005972052                           |
| 0.001320456                                          | 0.002669669                           | 1                                                  | 0.003256952                           |
| 0.001633219                                          | 0.002774736                           | 1                                                  | 0.003684985                           |
| 0.000885552                                          | 0.001888101                           | 0.998042576                                        | 0.002207865                           |
| 0.001426825                                          | 0.003355526                           | 0.997921                                           | 0.003438064                           |
| 0.001782278                                          | 0.003572078                           | 1                                                  | 0.004566324                           |
| 0.001286759                                          | 0.002890045                           | 0.9878424                                          | 0.003561125                           |
| 0.001459731                                          | 0.002712514                           | 0.986570584                                        | 0.003319393                           |
| 0.002660874                                          | 0.005407821                           | 1                                                  | 0.008971716                           |
| 0.001270121                                          | 0.002546378                           | 0.991515306                                        | 0.003262576                           |
| 0.001956269                                          | 0.00332938                            | 1                                                  | 0.00417037                            |
| 0.000980785                                          | 0.001641288                           | 0.99367095                                         | 0.002108983                           |
| 0.001274072                                          | 0.002539942                           | 1                                                  | 0.002984139                           |
| 0.004226665                                          | 0.008394587                           | 1                                                  | 0.011217404                           |
| 0.001254097                                          | 0.003336879                           | 1                                                  | 0.003483153                           |
| 0.001028718                                          | 0.002442762                           | 0.991919325                                        | 0.002620515                           |
| 0.002096633                                          | 0.004857966                           | 1                                                  | 0.006707547                           |
| 0.001322502                                          | 0.00243866                            | 1                                                  | 0.003038656                           |
| 0.001165599                                          | 0.002610855                           | 1                                                  | 0.003444764                           |
| 0.001743949                                          | 0.004021791                           | 1                                                  | 0.004418659                           |
| 0.000771081                                          | 0.001206583                           | 1                                                  | 0.001747182                           |
| 0.002182253                                          | 0.004407203                           | 1                                                  | 0.007522963                           |
| 0.002915369                                          | 0.005473193                           | 1                                                  | 0.006970112                           |
| 0.001748199                                          | 0.003096695                           | 1                                                  | 0.003913773                           |
| 0.001745239                                          | 0.002602483                           | 1                                                  | 0.003221376                           |
| 0.002059618                                          | 0.004206283                           | 1                                                  | 0.006033267                           |
| 0.002368837                                          | 0.004455249                           | 0.99853908                                         | 0.006360553                           |
| 0.001855667                                          | 0.004535012                           | 1                                                  | 0.005591741                           |
| 0.001778862                                          | 0.003523345                           | 0.996618776                                        | 0.004153441                           |
| 0.002393364                                          | 0.012685645                           | 1                                                  | 0.021032094                           |
| 0.001226415                                          | 0.002205563                           | 0.998287672                                        | 0.00275024                            |
| 0.001286497                                          | 0.002817969                           | 1                                                  | 0.003760227                           |
| 0.001547763                                          | 0.002554353                           | 1                                                  | 0.003805419                           |
| 0.00229885                                           | 0.005965282                           | 1                                                  | 0.008120411                           |
| 0.003974892                                          | 0.009404905                           | 0.99388385                                         | 0.016618079                           |
| 0.001605808                                          | 0.002800402                           | 0.996724006                                        | 0.003420814                           |
| 0.001064665                                          | 0.002117037                           | 0.994395561                                        | 0.002463315                           |
| 0.004327976                                          | 0.008080653                           | 1                                                  | 0.011319718                           |
| 0.002253391                                          | 0.004421488                           | 0.997025292                                        | 0.005398666                           |
| 0.000872523                                          | 0.001529133                           | 0.997651207                                        | 0.001904941                           |
| 0.004034706                                          | 0.00879961                            | 1                                                  | 0.012537402                           |
| 0.002300206                                          | 0.004013552                           | 1                                                  | 0.006686394                           |
| 0.005992773                                          | 0.013455818                           | 1                                                  | 0.023599537                           |
| 0.000870729                                          | 0.002155042                           | 0.996093765                                        | 0.002404313                           |

| wavelet.HLH_gldzm_LargeDistanceEmphasis | wavelet.HLH_gldzm_HighIntensitySmallDistanceEmphasis | wavelet.HLH_gldzm_LowIntensityLargeDistanceEmphasis | wavelet.HLH_gldzm_HighIntensityEmphasis |
|-----------------------------------------|------------------------------------------------------|-----------------------------------------------------|-----------------------------------------|
| 1                                       | 699.4850993                                          | 0.003178393                                         | 699.4850993                             |
| 1                                       | 566.0911162                                          | 0.009204715                                         | 566.0911162                             |
| 1                                       | 440.2377049                                          | 0.004963862                                         | 440.2377049                             |
| 1                                       | 218.0802292                                          | 0.0139498                                           | 218.0802292                             |
| 1                                       | 378.6930481                                          | 0.005086364                                         | 378.6930481                             |
| 1                                       | 924.2650273                                          | 0.004298654                                         | 924.2650273                             |
| 1.014212396                             | 756.7756613                                          | 0.002048173                                         | 759.6154757                             |
| 1                                       | 822.4284966                                          | 0.002118282                                         | 822.4284966                             |
| 1                                       | 544.0886774                                          | 0.003260715                                         | 544.0886774                             |
| 1                                       | 172.9101655                                          | 0.012300965                                         | 172.9101655                             |
| 1                                       | 172.2949002                                          | 0.013350055                                         | 172.2949002                             |
| 1.002835539                             | 385.6911626                                          | 0.005403742                                         | 385.8109641                             |
| 1                                       | 241.6969697                                          | 0.009405404                                         | 241.6969697                             |
| 1                                       | 466.5643045                                          | 0.004859069                                         | 466.5643045                             |
| 1                                       | 499.1053952                                          | 0.004278246                                         | 499.1053952                             |
| 1                                       | 441.6309751                                          | 0.004761267                                         | 441.6309751                             |
| 1                                       | 528.540395                                           | 0.004342495                                         | 528.540395                              |
| 1                                       | 388.5075988                                          | 0.006346398                                         | 388.5075988                             |
| 1                                       | 350.8213689                                          | 0.008820598                                         | 350.8213689                             |
| 1.003039514                             | 415.0300152                                          | 0.004596385                                         | 415.3221884                             |
| 1                                       | 276.6447689                                          | 0.007637065                                         | 276.6447689                             |
| 1                                       | 390.771134                                           | 0.005878387                                         | 390.771134                              |
| 1                                       | 372.6428571                                          | 0.006124469                                         | 372.6428571                             |
| 1                                       | 425.9055829                                          | 0.004759817                                         | 425.9055829                             |
| 1                                       | 170.1111111                                          | 0.015479377                                         | 170.1111111                             |
| 1                                       | 313.2892791                                          | 0.012780239                                         | 313.2892791                             |
| 1                                       | 645.6612803                                          | 0.003359451                                         | 645.6612803                             |
| 1.002991027                             | 680.8484546                                          | 0.002708309                                         | 681.2791625                             |
| 1                                       | 144.0531401                                          | 0.02210493                                          | 144.0531401                             |
| 1                                       | 635.6936219                                          | 0.003524718                                         | 635.6936219                             |
| 1                                       | 456.5481891                                          | 0.005804599                                         | 456.5481891                             |
| 1.006564551                             | 399.7092451                                          | 0.005812013                                         | 400.1236324                             |
| 1.001840491                             | 607.9509202                                          | 0.00364426                                          | 608.3116564                             |
| 1                                       | 425.7019811                                          | 0.00500532                                          | 425.7019811                             |
| 1.005788712                             | 596.2713459                                          | 0.003027451                                         | 597.040521                              |
| 1.002967359                             | 417.7448071                                          | 0.005013458                                         | 418.1038576                             |
| 1.005607477                             | 491.1376168                                          | 0.00368694                                          | 491.5280374                             |
| 1.018080668                             | 710.9106398                                          | 0.003652613                                         | 713.7065369                             |
| 1                                       | 358.5121107                                          | 0.006877359                                         | 358.5121107                             |
| 1                                       | 880.9934146                                          | 0.001870321                                         | 880.9934146                             |
| 1                                       | 415.8669202                                          | 0.004764336                                         | 415.8669202                             |
| 1.003389831                             | 335.9752825                                          | 0.005842764                                         | 336.2146893                             |
| 1                                       | 404.2280979                                          | 0.004078748                                         | 404.2280979                             |
| 1                                       | 562.4403202                                          | 0.0043526                                           | 562.4403202                             |
| 1                                       | 423.4343891                                          | 0.006525174                                         | 423.4343891                             |
| 1                                       | 483.5517241                                          | 0.00428391                                          | 483.5517241                             |
| 1                                       | 1252.090599                                          | 0.001686843                                         | 1252.090599                             |
| 1                                       | 312.2528736                                          | 0.00735207                                          | 312.2528736                             |
| 1                                       | 385.7007673                                          | 0.006387436                                         | 385.7007673                             |
| 1                                       | 125.7721239                                          | 0.032039394                                         | 125.7721239                             |
| 1                                       | 814.7796189                                          | 0.002399886                                         | 814.7796189                             |
| 1.003147954                             | 679.4481899                                          | 0.002619753                                         | 679.883001                              |
| 1.001623377                             | 267.7555465                                          | 0.006710505                                         | 267.8728355                             |
| 1                                       | 504.3478261                                          | 0.005452003                                         | 504.3478261                             |
| 1                                       | 265.4100719                                          | 0.009435115                                         | 265.4100719                             |
| 1                                       | 513.0647773                                          | 0.003933077                                         | 513.0647773                             |
| 1.006749156                             | 383.2481721                                          | 0.005994792                                         | 384.1428571                             |
| 1                                       | 591.102969                                           | 0.003256952                                         | 591.102969                              |
| 1                                       | 590.5164557                                          | 0.003684985                                         | 590.5164557                             |
| 1.002939015                             | 676.3591109                                          | 0.002211081                                         | 677.0617193                             |
| 1.003121748                             | 626.6399584                                          | 0.003444513                                         | 627.0176899                             |
| 1                                       | 411.9514563                                          | 0.004566324                                         | 411.9514563                             |
| 1.018348624                             | 471.945391                                           | 0.00361352                                          | 474.1537789                             |
| 1.020281233                             | 551.1842212                                          | 0.003372066                                         | 553.9094105                             |
| 1                                       | 301.3265306                                          | 0.008971716                                         | 301.3265306                             |
| 1.012781497                             | 592.8291236                                          | 0.003325386                                         | 593.9872185                             |
| 1                                       | 568.7205882                                          | 0.00417037                                          | 568.7205882                             |
| 1.00952381                              | 941.3812698                                          | 0.002124177                                         | 943.3365508                             |
| 1                                       | 537.9605501                                          | 0.002984139                                         | 537.9605501                             |
| 1                                       | 230.285                                              | 0.011217404                                         | 230.285                                 |
| 1                                       | 706.9466463                                          | 0.003483153                                         | 706.9466463                             |
| 1.012170385                             | 770.7676217                                          | 0.002634911                                         | 773.8904665                             |
| 1                                       | 296.1870883                                          | 0.006707547                                         | 296.1870883                             |
| 1                                       | 643.1521336                                          | 0.003038656                                         | 643.1521336                             |
| 1                                       | 554.4099061                                          | 0.003444764                                         | 554.4099061                             |
| 1                                       | 614.4704185                                          | 0.004418659                                         | 614.4704185                             |
| 1                                       | 1526.609865                                          | 0.001747182                                         | 1526.609865                             |
| 1                                       | 367.7291667                                          | 0.007522963                                         | 367.7291667                             |
| 1                                       | 299.114899                                           | 0.006970112                                         | 299.114899                              |
| 1                                       | 510.467306                                           | 0.003913773                                         | 510.467306                              |
| 1                                       | 699.4388366                                          | 0.003221376                                         | 699.4388366                             |
| 1                                       | 371.6727829                                          | 0.006033267                                         | 371.6727829                             |
| 1.002192982                             | 449.8442982                                          | 0.006371742                                         | 449.9517544                             |
| 1                                       | 294.5985599                                          | 0.005591741                                         | 294.5985599                             |
| 1.00508044                              | 489.2099915                                          | 0.004161512                                         | 490.0889077                             |
| 1                                       | 96.78285714                                          | 0.021032094                                         | 96.78285714                             |
| 1.002570694                             | 691.7619966                                          | 0.002754353                                         | 692.1636675                             |
| 1                                       | 486.6362725                                          | 0.003760227                                         | 486.6362725                             |
| 1                                       | 677.8365079                                          | 0.003805419                                         | 677.8365079                             |
| 1                                       | 236.6233766                                          | 0.008120411                                         | 236.6233766                             |
| 1.009202454                             | 167.1288344                                          | 0.016710103                                         | 167.3588957                             |
| 1.004922067                             | 598.0674733                                          | 0.003438943                                         | 598.4027892                             |
| 1.008430349                             | 652.5667403                                          | 0.002478535                                         | 653.9803292                             |
| 1                                       | 250.3738318                                          | 0.011319718                                         | 250.3738318                             |
| 1.004468719                             | 336.4518371                                          | 0.005415165                                         | 336.8659384                             |
| 1.003527337                             | 973.7880658                                          | 0.00190978                                          | 974.430923                              |
| 1                                       | 201.5892157                                          | 0.012537402                                         | 201.5892157                             |
| 1                                       | 443.2275132                                          | 0.006686394                                         | 443.2275132                             |
| 1                                       | 123.058296                                           | 0.023599537                                         | 123.058296                              |
| 1.005870841                             | 720.8740705                                          | 0.002412378                                         | 722.339726                              |

| wavelet.HLH_gldzm_DistanceZoneVariability | wavelet.HLH_gldzm_ZonePercentage | wavelet.HLH_gldzm_IntensityVariabilityNormalized | wavelet.HLH_gldzm_LowIntensitySmallDistanceEmphasis | wavelet.HLH_gldzm_IntensityVariability |
|-------------------------------------------|----------------------------------|--------------------------------------------------|-----------------------------------------------------|----------------------------------------|
| 1208                                      | 0.56927427                       | 0.041921945                                      | 0.003178393                                         | 50.61754967                            |
| 439                                       | 0.469518717                      | 0.046746333                                      | 0.009204715                                         | 20.52164009                            |
| 610                                       | 0.397653194                      | 0.053206127                                      | 0.004963862                                         | 32.4557377                             |
| 349                                       | 0.357215967                      | 0.061370596                                      | 0.0139498                                           | 21.4183811                             |
| 935                                       | 0.394847973                      | 0.058128056                                      | 0.005086364                                         | 54.34973262                            |
| 366                                       | 0.554545455                      | 0.044880408                                      | 0.004298654                                         | 16.42622951                            |
| 2509.113699                               | 0.44823925                       | 0.048588946                                      | 0.002019942                                         | 123.0757994                            |
| 1909                                      | 0.373727486                      | 0.055731981                                      | 0.002118282                                         | 106.392352                             |
| 1996                                      | 0.439067312                      | 0.05105351                                       | 0.003260715                                         | 101.9028056                            |
| 423                                       | 0.394589552                      | 0.066389462                                      | 0.012300965                                         | 28.08274232                            |
| 451                                       | 0.299071618                      | 0.072226784                                      | 0.013350055                                         | 32.57427938                            |
| 1056.00189                                | 0.459002169                      | 0.052374384                                      | 0.005382769                                         | 55.4120983                             |
| 462                                       | 0.247455811                      | 0.069845018                                      | 0.009405404                                         | 32.26839827                            |
| 762                                       | 0.443797321                      | 0.04623487                                       | 0.004859069                                         | 35.23097113                            |
| 797                                       | 0.40171371                       | 0.053461144                                      | 0.004278246                                         | 42.60853199                            |
| 1569                                      | 0.358546618                      | 0.051312455                                      | 0.004761267                                         | 80.50924156                            |
| 557                                       | 0.466499162                      | 0.059200835                                      | 0.004342495                                         | 32.97486535                            |
| 329                                       | 0.266828873                      | 0.074953114                                      | 0.006346398                                         | 24.65957447                            |
| 599                                       | 0.461479199                      | 0.049629182                                      | 0.008820598                                         | 29.7278798                             |
| 1970.004053                               | 0.379688402                      | 0.058141349                                      | 0.004580153                                         | 114.7710233                            |
| 822                                       | 0.271825397                      | 0.065607592                                      | 0.007637065                                         | 53.92944039                            |
| 485                                       | 0.449490269                      | 0.053723031                                      | 0.005878387                                         | 26.0556701                             |
| 476                                       | 0.46484375                       | 0.055275051                                      | 0.006124469                                         | 26.31092437                            |
| 1218                                      | 0.460143559                      | 0.04922064                                       | 0.004759817                                         | 59.95073892                            |
| 414                                       | 0.325216025                      | 0.070736773                                      | 0.015479377                                         | 29.28502415                            |
| 1082                                      | 0.456732799                      | 0.05214551                                       | 0.012780239                                         | 56.42144177                            |
| 1609                                      | 0.497680173                      | 0.041463088                                      | 0.003359451                                         | 66.71410814                            |
| 1001.001994                               | 0.36314265                       | 0.061083947                                      | 0.002701818                                         | 61.2671984                             |
| 207                                       | 0.463087248                      | 0.062708581                                      | 0.02210493                                          | 12.98067633                            |
| 878                                       | 0.427458617                      | 0.053678634                                      | 0.003524718                                         | 47.12984055                            |
| 1629                                      | 0.342370744                      | 0.054838993                                      | 0.005804599                                         | 89.33271946                            |
| 910.0087527                               | 0.441759304                      | 0.047589407                                      | 0.005738602                                         | 43.49671772                            |
| 1628.001227                               | 0.504800248                      | 0.040595431                                      | 0.003641325                                         | 66.17055215                            |
| 1161                                      | 0.494042553                      | 0.047503526                                      | 0.00500532                                          | 55.15159345                            |
| 2065.015437                               | 0.470708447                      | 0.046685976                                      | 0.00301082                                          | 96.78002894                            |
| 1009.001978                               | 0.337112371                      | 0.055524737                                      | 0.005005794                                         | 56.1355094                             |
| 1066.007477                               | 0.287557108                      | 0.062901563                                      | 0.003659351                                         | 67.3046729                             |
| 2131.156699                               | 0.417942259                      | 0.040767528                                      | 0.003488542                                         | 78.93555865                            |
| 578                                       | 0.469918699                      | 0.054704805                                      | 0.006877359                                         | 31.61937716                            |
| 3037                                      | 0.417744154                      | 0.047792623                                      | 0.001870321                                         | 145.1461969                            |
| 789                                       | 0.304163454                      | 0.06086381                                       | 0.004764336                                         | 48.02154626                            |
| 1766.00452                                | 0.457719162                      | 0.056897443                                      | 0.005812231                                         | 100.7084746                            |
| 1267                                      | 0.346838215                      | 0.067001643                                      | 0.004078748                                         | 84.89108129                            |
| 1374                                      | 0.552250804                      | 0.043346067                                      | 0.0043526                                           | 59.55749636                            |
| 663                                       | 0.518779343                      | 0.042420899                                      | 0.006525174                                         | 28.11312217                            |
| 1189                                      | 0.433151184                      | 0.046568595                                      | 0.00428391                                          | 55.37005887                            |
| 2053                                      | 0.45002192                       | 0.046854555                                      | 0.001686843                                         | 96.19240136                            |
| 348                                       | 0.399540758                      | 0.063234906                                      | 0.00735207                                          | 22.00574713                            |
| 391                                       | 0.459459459                      | 0.0563641                                        | 0.006387436                                         | 22.03836317                            |
| 452                                       | 0.334319527                      | 0.07035594                                       | 0.032039394                                         | 31.80088496                            |
| 1207                                      | 0.46983262                       | 0.043995673                                      | 0.002399886                                         | 53.10273405                            |
| 1902.004197                               | 0.565410857                      | 0.044554172                                      | 0.002612618                                         | 84.92025184                            |
| 1846.001082                               | 0.409574468                      | 0.059638008                                      | 0.006703483                                         | 110.211039                             |
| 391                                       | 0.354166667                      | 0.059621536                                      | 0.005452003                                         | 23.31202046                            |
| 556                                       | 0.418045113                      | 0.056615858                                      | 0.009435115                                         | 31.47841727                            |
| 988                                       | 0.506666667                      | 0.048394499                                      | 0.003933077                                         | 47.81376518                            |
| 1770.017998                               | 0.439555006                      | 0.050659163                                      | 0.005966367                                         | 90.071991                              |
| 1583                                      | 0.457779063                      | 0.041621556                                      | 0.003256952                                         | 65.88692356                            |
| 790                                       | 0.479368932                      | 0.048617209                                      | 0.003684985                                         | 38.40759494                            |
| 4075.007837                               | 0.447255997                      | 0.048841846                                      | 0.002207061                                         | 199.4212589                            |
| 959.0020812                               | 0.54416761                       | 0.044285945                                      | 0.003436451                                         | 42.55879292                            |
| 1133                                      | 0.424344569                      | 0.054825585                                      | 0.004566324                                         | 62.11738747                            |
| 2261.171254                               | 0.395405079                      | 0.054710154                                      | 0.003548026                                         | 125.2315422                            |
| 3648.338021                               | 0.485110849                      | 0.048198184                                      | 0.003306225                                         | 178.2368848                            |
| 245                                       | 0.310126582                      | 0.069620991                                      | 0.008971716                                         | 17.05714286                            |
| 1629.059647                               | 0.42542724                       | 0.04603495                                       | 0.003246874                                         | 75.63542301                            |
| 680                                       | 0.521472393                      | 0.045622837                                      | 0.00417037                                          | 31.02352941                            |
| 3130.063492                               | 0.504                            | 0.043244545                                      | 0.002105184                                         | 136.2203175                            |
| 2763                                      | 0.471743213                      | 0.055085891                                      | 0.002984139                                         | 152.2023163                            |
| 1200                                      | 0.414078675                      | 0.055761111                                      | 0.011217404                                         | 66.91333333                            |
| 656                                       | 0.505003849                      | 0.046205756                                      | 0.003483153                                         | 30.31097561                            |
| 1956.064909                               | 0.45967366                       | 0.04466229                                       | 0.002616916                                         | 88.07403651                            |
| 759                                       | 0.333040807                      | 0.063208125                                      | 0.006707547                                         | 47.97496706                            |
| 1078                                      | 0.477202302                      | 0.049282152                                      | 0.003038656                                         | 53.12615955                            |
| 1171                                      | 0.374001916                      | 0.047890196                                      | 0.003444764                                         | 56.0794193                             |
| 693                                       | 0.516393443                      | 0.044503997                                      | 0.004418659                                         | 30.84126984                            |
| 1115                                      | 0.465358932                      | 0.042384122                                      | 0.001747182                                         | 47.25829596                            |
| 288                                       | 0.300626305                      | 0.067153742                                      | 0.007522963                                         | 19.34027778                            |
| 792                                       | 0.46397188                       | 0.056639629                                      | 0.006970112                                         | 44.85858586                            |
| 1147                                      | 0.490380504                      | 0.050807649                                      | 0.003913773                                         | 58.27637315                            |
| 1169                                      | 0.587732529                      | 0.042093255                                      | 0.003221376                                         | 49.20701454                            |
| 654                                       | 0.363535297                      | 0.055158096                                      | 0.006033267                                         | 36.0733945                             |
| 1366.001462                               | 0.418476598                      | 0.052411426                                      | 0.006357756                                         | 71.69883041                            |
| 1111                                      | 0.361535958                      | 0.068529175                                      | 0.005591741                                         | 76.13591359                            |
| 1177.006774                               | 0.484214842                      | 0.043340042                                      | 0.004151424                                         | 51.18458933                            |
| 175                                       | 0.114229765                      | 0.137436735                                      | 0.021032094                                         | 24.05142857                            |
| 1165.001714                               | 0.489308176                      | 0.046957571                                      | 0.002749212                                         | 54.79948586                            |
| 998                                       | 0.363967907                      | 0.059427427                                      | 0.003760227                                         | 59.30861723                            |
| 630                                       | 0.430327869                      | 0.054693878                                      | 0.003805419                                         | 34.45714286                            |
| 616                                       | 0.304197531                      | 0.073109926                                      | 0.008120411                                         | 45.03571429                            |
| 324.006135                                | 0.25                             | 0.083894765                                      | 0.016595072                                         | 27.34969325                            |
| 1215.006563                               | 0.511754828                      | 0.0442589                                        | 0.003416282                                         | 53.95159967                            |
| 2477.039342                               | 0.480609686                      | 0.046503986                                      | 0.00245951                                          | 115.8414291                            |
| 1391                                      | 0.421515152                      | 0.054418334                                      | 0.011319718                                         | 75.69590223                            |
| 2008.008937                               | 0.462775735                      | 0.054812933                                      | 0.005394541                                         | 110.3932473                            |
| 1697.004703                               | 0.497077732                      | 0.042656721                                      | 0.001903731                                         | 72.55908289                            |
| 1020                                      | 0.362087327                      | 0.063010381                                      | 0.012537402                                         | 64.27058824                            |
| 378                                       | 0.361031519                      | 0.057739145                                      | 0.006686394                                         | 21.82539683                            |
| 223                                       | 0.267386091                      | 0.077037543                                      | 0.023599537                                         | 17.1793722                             |
| 2545.019569                               | 0.442500866                      | 0.043794409                                      | 0.002402297                                         | 111.8947162                            |

| wavelet.HLH_gldzm_HighIntensityLargeDistanceEmphasis | wavelet.HLH_gldzm_SmallDistanceEmphasis | wavelet.HLH_gldzm_SumVariance | wavelet.HLH_gldzm_Homogeneity1 | wavelet.HLH_gldzm_Homogeneity2 |
|------------------------------------------------------|-----------------------------------------|-------------------------------|--------------------------------|--------------------------------|
| 699.4850993                                          | 1                                       | 2176.289621                   | 0.250547141                    | 0.160418493                    |
| 566.0911162                                          | 1                                       | 1752.925312                   | 0.309854663                    | 0.222747568                    |
| 440.2377049                                          | 1                                       | 1239.786929                   | 0.335907965                    | 0.247761359                    |
| 218.0802292                                          | 1                                       | 554.4068353                   | 0.35978163                     | 0.277309813                    |
| 378.6930481                                          | 1                                       | 1068.200517                   | 0.323695953                    | 0.232308166                    |
| 924.2650273                                          | 1                                       | 3068.072371                   | 0.25635473                     | 0.165387187                    |
| 770.9747335                                          | 0.996446901                             | 2435.873743                   | 0.302767574                    | 0.213147903                    |
| 822.4284966                                          | 1                                       | 2742.384077                   | 0.347810862                    | 0.262778497                    |
| 544.0886774                                          | 1                                       | 1677.247637                   | 0.308144152                    | 0.219228091                    |
| 172.9101655                                          | 1                                       | 447.7693288                   | 0.345675249                    | 0.256344547                    |
| 172.2949002                                          | 1                                       | 468.3996626                   | 0.410500089                    | 0.33139667                     |
| 386.2901701                                          | 0.999291115                             | 1083.682075                   | 0.30226559                     | 0.211965203                    |
| 241.6969697                                          | 1                                       | 656.6743835                   | 0.43579356                     | 0.365243348                    |
| 466.5643045                                          | 1                                       | 1363.719888                   | 0.301718668                    | 0.214069721                    |
| 499.1053952                                          | 1                                       | 1513.269663                   | 0.330229891                    | 0.245108119                    |
| 441.6309751                                          | 1                                       | 1286.926315                   | 0.360938702                    | 0.278793732                    |
| 528.540395                                           | 1                                       | 1640.291921                   | 0.31003742                     | 0.217156838                    |
| 388.5075988                                          | 1                                       | 1228.578542                   | 0.406466167                    | 0.32749317                     |
| 350.8213689                                          | 1                                       | 969.8579058                   | 0.29744896                     | 0.206549895                    |
| 416.4908815                                          | 0.999240122                             | 1226.968822                   | 0.34179761                     | 0.254582987                    |
| 276.6447689                                          | 1                                       | 850.7997318                   | 0.413582116                    | 0.337335176                    |
| 390.771134                                           | 1                                       | 1183.251587                   | 0.303179376                    | 0.210781952                    |
| 372.6428571                                          | 1                                       | 1075.872276                   | 0.297571918                    | 0.205250465                    |
| 425.9055829                                          | 1                                       | 1232.194364                   | 0.309291068                    | 0.221577684                    |
| 170.1111111                                          | 1                                       | 447.5994459                   | 0.37573589                     | 0.289913532                    |
| 313.2892791                                          | 1                                       | 866.919526                    | 0.312509982                    | 0.223404642                    |
| 645.6612803                                          | 1                                       | 2030.430734                   | 0.27349842                     | 0.18303268                     |
| 683.001994                                           | 0.999252243                             | 2203.276374                   | 0.354986896                    | 0.269528164                    |
| 144.0531401                                          | 1                                       | 372.494727                    | 0.312936936                    | 0.221727194                    |
| 635.6936219                                          | 1                                       | 2020.882061                   | 0.318572449                    | 0.229358363                    |
| 456.5481891                                          | 1                                       | 1366.134944                   | 0.367790765                    | 0.288075887                    |
| 401.7811816                                          | 0.998358862                             | 1106.027138                   | 0.299507992                    | 0.20978842                     |
| 609.7546012                                          | 0.999539877                             | 1833.483321                   | 0.273176479                    | 0.185089651                    |
| 425.7019811                                          | 1                                       | 1269.810017                   | 0.286596393                    | 0.195139764                    |
| 600.1172214                                          | 0.998552822                             | 1847.844291                   | 0.298454168                    | 0.21013133                     |
| 419.5400593                                          | 0.99925816                              | 1224.947368                   | 0.377705698                    | 0.300038358                    |
| 493.0897196                                          | 0.998598131                             | 1541.627384                   | 0.397635401                    | 0.320118557                    |
| 724.8901252                                          | 0.995479833                             | 2235.281059                   | 0.323530539                    | 0.241654949                    |
| 358.5121107                                          | 1                                       | 1030.466313                   | 0.289521607                    | 0.195372374                    |
| 880.9934146                                          | 1                                       | 2863.268413                   | 0.318867435                    | 0.23174476                     |
| 415.8669202                                          | 1                                       | 1227.903257                   | 0.384352592                    | 0.304195405                    |
| 337.1723164                                          | 0.999152542                             | 975.9706792                   | 0.299822929                    | 0.207650614                    |
| 404.2280979                                          | 1                                       | 1229.101134                   | 0.359902905                    | 0.273293354                    |
| 562.4403202                                          | 1                                       | 1764.430419                   | 0.254271427                    | 0.162481526                    |
| 423.4343891                                          | 1                                       | 1122.363286                   | 0.273296526                    | 0.184052999                    |
| 483.5517241                                          | 1                                       | 1422.654852                   | 0.320333824                    | 0.234158445                    |
| 1252.090599                                          | 1                                       | 4197.931051                   | 0.300196311                    | 0.211878019                    |
| 312.2528736                                          | 1                                       | 865.6433703                   | 0.339908816                    | 0.251909742                    |
| 385.7007673                                          | 1                                       | 1090.559945                   | 0.307954704                    | 0.217330982                    |
| 125.7721239                                          | 1                                       | 300.4719508                   | 0.38804038                     | 0.305225832                    |
| 814.7796189                                          | 1                                       | 2615.288006                   | 0.284908744                    | 0.197091229                    |
| 681.6222455                                          | 0.999213012                             | 2168.018074                   | 0.251941563                    | 0.159473438                    |
| 268.3419913                                          | 0.999594156                             | 749.0240818                   | 0.329230083                    | 0.239620233                    |
| 504.3478261                                          | 1                                       | 1653.880286                   | 0.367616877                    | 0.283281048                    |
| 265.4100719                                          | 1                                       | 748.4544067                   | 0.335196042                    | 0.247488443                    |
| 513.0647773                                          | 1                                       | 1580.067263                   | 0.286703295                    | 0.195424175                    |
| 387.7215973                                          | 0.998312711                             | 1110.2352                     | 0.31430533                     | 0.226306861                    |
| 591.102969                                           | 1                                       | 1790.005447                   | 0.284546248                    | 0.194163872                    |
| 590.5164557                                          | 1                                       | 1827.533843                   | 0.297983355                    | 0.208161731                    |
| 679.8721528                                          | 0.999265246                             | 2177.492369                   | 0.305901832                    | 0.219970108                    |
| 628.528616                                           | 0.999219563                             | 1960.198356                   | 0.260545559                    | 0.169389106                    |
| 411.9514563                                          | 1                                       | 1208.423263                   | 0.314409551                    | 0.223582145                    |
| 482.9873307                                          | 0.995412844                             | 1427.267355                   | 0.343156981                    | 0.256288834                    |
| 564.8101677                                          | 0.994929692                             | 1708.887958                   | 0.28243343                     | 0.191240116                    |
| 301.3265306                                          | 1                                       | 875.4978862                   | 0.405667436                    | 0.327850392                    |
| 598.6195983                                          | 0.996804626                             | 1813.291328                   | 0.312084292                    | 0.225329663                    |
| 568.7205882                                          | 1                                       | 1685.376725                   | 0.258290143                    | 0.166285368                    |
| 951.1431746                                          | 0.997619048                             | 3093.221058                   | 0.271438839                    | 0.180265714                    |
| 537.9605501                                          | 1                                       | 1675.195277                   | 0.310405031                    | 0.22078604                     |
| 230.285                                              | 1                                       | 602.2544059                   | 0.330770109                    | 0.240816773                    |
| 706.9466463                                          | 1                                       | 2228.099178                   | 0.280602759                    | 0.193213087                    |
| 786.3818458                                          | 0.996957404                             | 2497.933526                   | 0.294802503                    | 0.205888077                    |
| 296.1870883                                          | 1                                       | 859.2914977                   | 0.369938704                    | 0.286660503                    |
| 643.1521336                                          | 1                                       | 2004.627606                   | 0.28738504                     | 0.194755457                    |
| 554.4099061                                          | 1                                       | 1712.760105                   | 0.346200994                    | 0.26257915                     |
| 614.4704185                                          | 1                                       | 1830.843738                   | 0.282051856                    | 0.191749483                    |
| 1526.609865                                          | 1                                       | 5096.323532                   | 0.298342581                    | 0.21374004                     |
| 367.7291667                                          | 1                                       | 1111.069384                   | 0.376565009                    | 0.293421146                    |
| 299.114899                                           | 1                                       | 853.5130264                   | 0.306555776                    | 0.214850474                    |
| 510.467306                                           | 1                                       | 1547.231734                   | 0.287549301                    | 0.195398972                    |
| 699.4388366                                          | 1                                       | 2184.915476                   | 0.247688146                    | 0.158287846                    |
| 371.6727829                                          | 1                                       | 1103.828759                   | 0.359620134                    | 0.278225715                    |
| 450.3815789                                          | 0.999451754                             | 1342.507026                   | 0.33038891                     | 0.245978897                    |
| 294.5985599                                          | 1                                       | 863.9892441                   | 0.344384257                    | 0.254043746                    |
| 493.6045724                                          | 0.99872989                              | 1381.108953                   | 0.275344315                    | 0.18689217                     |
| 96.78285714                                          | 1                                       | 258.8400823                   | 0.56043653                     | 0.513868729                    |
| 693.7703513                                          | 0.999357326                             | 2172.496594                   | 0.278217455                    | 0.186380728                    |
| 486.6362725                                          | 1                                       | 1516.831509                   | 0.364721826                    | 0.282266313                    |
| 677.8365079                                          | 1                                       | 2213.285821                   | 0.321742407                    | 0.235218004                    |
| 236.6233766                                          | 1                                       | 656.821147                    | 0.398516215                    | 0.318748471                    |
| 168.2791411                                          | 0.997699387                             | 459.6392482                   | 0.440334227                    | 0.367183379                    |
| 599.7440525                                          | 0.998769483                             | 1802.593775                   | 0.279169156                    | 0.189094664                    |
| 659.6346849                                          | 0.997892413                             | 2041.384567                   | 0.283501179                    | 0.191726476                    |
| 250.3738318                                          | 1                                       | 680.4979852                   | 0.315544642                    | 0.224087011                    |
| 338.5223436                                          | 0.99888282                              | 959.5131147                   | 0.295554386                    | 0.202088868                    |
| 977.0023516                                          | 0.999118166                             | 3163.800726                   | 0.278992028                    | 0.191653188                    |
| 201.5892157                                          | 1                                       | 545.3126614                   | 0.36314899                     | 0.277331828                    |
| 443.2275132                                          | 1                                       | 1373.522056                   | 0.367230044                    | 0.288345902                    |
| 123.058296                                           | 1                                       | 310.4275118                   | 0.421519054                    | 0.34491698                     |
| 728.2023483                                          | 0.99853229                              | 2216.510518                   | 0.310635133                    | 0.225697115                    |











| wavelet.HLH_firstorder_Skewness | wavelet.HLH_firstorder_Uniformity | wavelet.HLH_firstorder_MeanAbsoluteDeviation | wavelet.HLH_firstorder_Energy | wavelet.HLH_firstorder_RobustMeanAbsoluteDeviation |
|---------------------------------|-----------------------------------|----------------------------------------------|-------------------------------|----------------------------------------------------|
| 0.33871485                      | 0.053333819                       | 112.4260136                                  | 49095125.12                   | 71.04649413                                        |
| -0.585725107                    | 0.068196403                       | 98.14904299                                  | 19183247.29                   | 54.99754499                                        |
| 0.253790174                     | 0.0755717                         | 78.0423185                                   | 16621723.98                   | 50.06998098                                        |
| 0.457209101                     | 0.099277235                       | 63.8745377                                   | 8146965.551                   | 37.50928428                                        |
| 0.56451762                      | 0.086443615                       | 68.40380213                                  | 20877751.58                   | 43.17560997                                        |
| -0.603820388                    | 0.057681359                       | 107.0527364                                  | 14954980.11                   | 66.03865177                                        |
| 0.146982312                     | 0.06185994                        | 93.23460452                                  | 83638076.08                   | 62.33767502                                        |
| -0.174730438                    | 0.095062469                       | 66.56761386                                  | 47234815.48                   | 39.06231146                                        |
| 0.41400414                      | 0.07827044                        | 78.23940168                                  | 55257134.62                   | 47.34315417                                        |
| 0.266794704                     | 0.094045862                       | 61.89118924                                  | 7065031.047                   | 40.77346911                                        |
| -0.197839354                    | 0.111582612                       | 52.7984666                                   | 7448128.001                   | 34.07875295                                        |
| 0.318846905                     | 0.076748933                       | 79.52535478                                  | 27962597.71                   | 48.59916601                                        |
| 0.484004975                     | 0.14462191                        | 45.52360606                                  | 8739135.078                   | 25.10744611                                        |
| 0.327943491                     | 0.073046981                       | 85.55828103                                  | 24799154.88                   | 50.7101051                                         |
| 0.235531497                     | 0.086931846                       | 72.9256507                                   | 21781400.81                   | 42.28701957                                        |
| 0.341056457                     | 0.083519693                       | 74.88490591                                  | 49941192.58                   | 44.2730846                                         |
| 0.016864426                     | 0.075459654                       | 76.89305822                                  | 12302481.1                    | 51.08339751                                        |
| -0.354129021                    | 0.129818081                       | 48.57573269                                  | 6053519.325                   | 28.73769828                                        |
| 0.355080008                     | 0.071348359                       | 85.51841479                                  | 17758962.9                    | 53.08124622                                        |
| 0.540931389                     | 0.090994573                       | 67.58737713                                  | 48131050.67                   | 40.94365024                                        |
| -0.611683996                    | 0.12182391                        | 52.07784696                                  | 16977104.21                   | 30.31271527                                        |
| -0.184172732                    | 0.077026148                       | 77.91608881                                  | 11713911.34                   | 49.89988469                                        |
| 0.183513986                     | 0.071783066                       | 80.88177463                                  | 11611303.47                   | 53.65305886                                        |
| 0.113008899                     | 0.069702334                       | 87.45829349                                  | 38125064.76                   | 53.2928217                                         |
| -0.172445813                    | 0.10388151                        | 56.20010697                                  | 7076763.334                   | 36.64312871                                        |
| 0.259942355                     | 0.07744842                        | 78.71694831                                  | 28194658.14                   | 47.88864992                                        |
| -0.118081084                    | 0.054256919                       | 108.2299419                                  | 66209524.8                    | 70.24383393                                        |
| 0.103071291                     | 0.096988928                       | 62.46554884                                  | 20796989.13                   | 38.41421472                                        |
| 0.083609738                     | 0.079260694                       | 73.14274794                                  | 3934163.561                   | 49.33818053                                        |
| 0.37749627                      | 0.080111574                       | 77.26074194                                  | 24752794.13                   | 46.57861549                                        |
| 0.062620118                     | 0.102807228                       | 64.53098626                                  | 44842447.04                   | 35.42393176                                        |
| 0.40814532                      | 0.065435328                       | 90.97511774                                  | 31107108.74                   | 57.97457672                                        |
| 0.23184771                      | 0.052138501                       | 113.184107                                   | 73554168.9                    | 73.03983814                                        |
| 0.112780587                     | 0.059959801                       | 96.86323569                                  | 37770224.68                   | 64.10957593                                        |
| 0.140561281                     | 0.069693887                       | 88.57783425                                  | 67154809.55                   | 53.23851941                                        |
| 0.092209492                     | 0.105618289                       | 64.49935861                                  | 28359328.54                   | 34.77971458                                        |
| 0.537565697                     | 0.118875336                       | 54.76397287                                  | 25580656.27                   | 30.70107001                                        |
| -0.072499498                    | 0.068145682                       | 96.14355519                                  | 100167285.1                   | 54.48470412                                        |
| 0.031046461                     | 0.072505784                       | 81.74978785                                  | 14368330.84                   | 54.11643357                                        |
| 0.479367427                     | 0.074183857                       | 84.45262653                                  | 108177463.8                   | 50.0802134                                         |
| 0.466087748                     | 0.113605979                       | 56.46817739                                  | 18201583.09                   | 32.04550758                                        |
| 0.026653584                     | 0.078015866                       | 74.47759776                                  | 37391713.62                   | 48.4026827                                         |
| 0.167735022                     | 0.10507779                        | 56.98541761                                  | 22345250.16                   | 35.53851544                                        |
| -0.033082568                    | 0.050600761                       | 112.3574201                                  | 50674061.45                   | 77.71260066                                        |
| 0.295046214                     | 0.055313099                       | 107.4860629                                  | 26078545.96                   | 69.57115229                                        |
| 0.420751324                     | 0.064781072                       | 92.2785712                                   | 42716057.63                   | 58.25751011                                        |
| 0.900883054                     | 0.073466051                       | 88.16476748                                  | 83546682.29                   | 50.29914814                                        |
| 0.51293157                      | 0.095213678                       | 63.21803696                                  | 6537572.323                   | 39.48709768                                        |
| 0.386916838                     | 0.081020324                       | 76.36821563                                  | 9373692.206                   | 47.03236498                                        |
| 0.160069597                     | 0.115222681                       | 52.48069931                                  | 6952623.838                   | 32.67190315                                        |
| 0.157754129                     | 0.056511592                       | 103.9122843                                  | 47864030.31                   | 68.89177501                                        |
| -0.008799245                    | 0.054836914                       | 105.396198                                   | 63619334.71                   | 70.13915012                                        |
| 0.138980573                     | 0.086924034                       | 67.50953649                                  | 36159923.71                   | 43.70225016                                        |
| -0.773384001                    | 0.100148012                       | 63.44434257                                  | 9303139.328                   | 37.52626257                                        |
| 0.142688689                     | 0.083609023                       | 70.64472132                                  | 121172891.26                  | 44.61929579                                        |
| 0.062924414                     | 0.06322998                        | 92.9983055                                   | 30332080.84                   | 59.61341834                                        |
| 0.18299989                      | 0.073639113                       | 81.99148802                                  | 50867071                      | 50.9683717                                         |
| 0.397640127                     | 0.053679434                       | 109.8059935                                  | 74742031.06                   | 70.39154239                                        |
| 0.038794174                     | 0.070615898                       | 85.69638701                                  | 22672837.52                   | 53.17058007                                        |
| 0.050238037                     | 0.07552085                        | 81.94333996                                  | 119257105.6                   | 49.43121266                                        |
| 0.0979529                       | 0.05227533                        | 111.613858                                   | 37297978.73                   | 75.30089616                                        |
| 0.098769954                     | 0.081870695                       | 72.84940445                                  | 26073298.05                   | 45.6328869                                         |
| 0.316182285                     | 0.08057666                        | 74.20954993                                  | 60298040.41                   | 46.87576935                                        |
| 0.142082327                     | 0.063963014                       | 91.91200197                                  | 114545289.6                   | 59.45958859                                        |
| 1.08737374                      | 0.126649575                       | 51.70766809                                  | 4976599.278                   | 29.37289549                                        |
| 0.138007569                     | 0.075097465                       | 84.07520801                                  | 55294778.43                   | 49.31998695                                        |
| 0.226597633                     | 0.055133567                       | 104.2506299                                  | 23934973.01                   | 69.70389964                                        |
| 0.489166322                     | 0.058501222                       | 103.1210082                                  | 128373622.1                   | 64.58597968                                        |
| 0.109278344                     | 0.077606873                       | 77.11827186                                  | 65410897.8                    | 48.35381259                                        |
| 0.099218461                     | 0.072446622                       | 78.68664454                                  | 30012685.55                   | 52.8779094                                         |
| 0.317441003                     | 0.067104974                       | 96.23972349                                  | 24573798.15                   | 55.73143974                                        |
| -0.227495429                    | 0.065968453                       | 93.82921396                                  | 73998328.33                   | 56.87215825                                        |
| 0.178376577                     | 0.106300713                       | 57.96236064                                  | 15465514.7                    | 34.44715213                                        |
| 0.180418401                     | 0.067606089                       | 88.53244964                                  | 32802956.59                   | 56.15913045                                        |
| 5.34E-05                        | 0.076728006                       | 81.85599996                                  | 40956009.23                   | 48.63739696                                        |
| 0.299157385                     | 0.060184435                       | 101.7296233                                  | 26877372.31                   | 62.45481711                                        |
| 0.990875072                     | 0.070811536                       | 102.5317984                                  | 67153840.85                   | 51.98169346                                        |
| 0.126865496                     | 0.116101743                       | 53.98828267                                  | 5996156.875                   | 31.64148314                                        |
| 0.276285747                     | 0.075421547                       | 77.67278535                                  | 18214193.01                   | 50.26153041                                        |
| 0.16845522                      | 0.065467405                       | 88.2966279                                   | 31118287.25                   | 58.99648131                                        |
| 0.314524477                     | 0.05276962                        | 113.9637464                                  | 47321984.41                   | 72.03524809                                        |
| 0.114222962                     | 0.101284421                       | 64.38712561                                  | 15556078.34                   | 36.50322637                                        |
| -0.142625638                    | 0.085392867                       | 74.76314179                                  | 38241261.37                   | 43.11935983                                        |
| 0.135874996                     | 0.096155604                       | 59.73331753                                  | 18598158.48                   | 39.75729146                                        |
| 0.273807244                     | 0.051137211                       | 112.158071                                   | 49302989.52                   | 77.51915638                                        |
| -0.123124248                    | 0.238795172                       | 24.62736542                                  | 1799282.089                   | 15.1152757                                         |
| 0.128324165                     | 0.059656044                       | 96.99875906                                  | 38290909.89                   | 64.37759549                                        |
| 0.378327229                     | 0.098754762                       | 63.3950815                                   | 22711995.51                   | 37.53704345                                        |
| 0.1513745                       | 0.081747925                       | 76.06759668                                  | 17013786.92                   | 45.66233349                                        |
| 0.528444415                     | 0.124031581                       | 49.9572744                                   | 10421211.03                   | 29.55003898                                        |
| -0.137282498                    | 0.140603241                       | 43.38969058                                  | 4920975.826                   | 25.84674377                                        |
| 0.462483336                     | 0.057108978                       | 104.9935307                                  | 48806589.09                   | 66.36706604                                        |
| 0.331701108                     | 0.061499644                       | 95.49268279                                  | 83935540.65                   | 61.46689125                                        |
| 0.275697463                     | 0.070201286                       | 82.05984077                                  | 37990871.77                   | 54.59018721                                        |
| 0.23376414                      | 0.073594671                       | 79.13246574                                  | 47532453.34                   | 51.77377113                                        |
| 0.13336189                      | 0.060698454                       | 100.5896492                                  | 65278298.18                   | 61.72095025                                        |
| 0.102078293                     | 0.100406037                       | 59.74407367                                  | 18807550.16                   | 37.02304297                                        |
| 0.178403607                     | 0.105721628                       | 64.85261046                                  | 10404807.39                   | 34.8773344                                         |
| 0.16236571                      | 0.133450074                       | 45.59236995                                  | 3318751.094                   | 27.89433742                                        |
| 0.507937538                     | 0.067185665                       | 93.6979829                                   | 102451714.2                   | 55.69101504                                        |





| wavelet.HLH_firstorder_Mean | wavelet.HLH_glrlm_ShortRunLowGrayLevelEmphasis | wavelet.HLH_glrlm_GrayLevelVariance | wavelet.HLH_glrlm_LowGrayLevelRunEmphasis | wavelet.HLH_glrlm_GrayLevelNonUniformityNormalized |
|-----------------------------|------------------------------------------------|-------------------------------------|-------------------------------------------|----------------------------------------------------|
| -1.080188048                | 0.002534877                                    | 38.13875415                         | 0.00259023                                | 0.05227433                                         |
| -10.95859274                | 0.005692776                                    | 34.14983067                         | 0.005797821                               | 0.065684447                                        |
| 7.152849934                 | 0.003601731                                    | 18.30715141                         | 0.003758712                               | 0.072762215                                        |
| 0.16897005                  | 0.010732631                                    | 14.31565005                         | 0.011307434                               | 0.093662344                                        |
| -1.858708854                | 0.003851801                                    | 14.91536182                         | 0.004009616                               | 0.083744594                                        |
| -17.77168167                | 0.002896938                                    | 36.78859075                         | 0.003030833                               | 0.056389543                                        |
| 7.978180559                 | 0.001682858                                    | 24.38356348                         | 0.001751085                               | 0.060540225                                        |
| -5.602672234                | 0.001540639                                    | 15.72893037                         | 0.001616635                               | 0.089981215                                        |
| -0.87992747                 | 0.00254253                                     | 20.5548413                          | 0.002646157                               | 0.075086343                                        |
| -1.704306565                | 0.009130922                                    | 11.03614357                         | 0.009498362                               | 0.09138928                                         |
| 3.424589144                 | 0.008565027                                    | 8.385073907                         | 0.009045674                               | 0.1068919                                          |
| 2.461641727                 | 0.004174038                                    | 20.24711696                         | 0.0043159                                 | 0.074124195                                        |
| 0.386378007                 | 0.005836358                                    | 8.292754205                         | 0.006284812                               | 0.133059872                                        |
| 1.054663661                 | 0.003544513                                    | 24.38270881                         | 0.003664006                               | 0.07012347                                         |
| -0.669246356                | 0.003044105                                    | 18.61996658                         | 0.003162313                               | 0.083091113                                        |
| 12.28138917                 | 0.003369015                                    | 19.12123466                         | 0.003539648                               | 0.079621079                                        |
| -3.061946432                | 0.003130766                                    | 17.10162141                         | 0.003219409                               | 0.074031302                                        |
| -6.278324612                | 0.00363331                                     | 8.508577414                         | 0.003853917                               | 0.121181744                                        |
| 2.578141908                 | 0.006039244                                    | 22.88598571                         | 0.006199353                               | 0.068928516                                        |
| -0.145994877                | 0.003398086                                    | 15.68882555                         | 0.003553721                               | 0.087186121                                        |
| -5.425516314                | 0.004931175                                    | 9.75289181                          | 0.005249234                               | 0.113635392                                        |
| -8.754536352                | 0.004228101                                    | 17.98659296                         | 0.004356166                               | 0.074803751                                        |
| 0.003615854                 | 0.004527696                                    | 18.86188954                         | 0.004663059                               | 0.070288181                                        |
| 5.238100257                 | 0.003710064                                    | 23.96241985                         | 0.003844203                               | 0.067124844                                        |
| -2.459839853                | 0.009935283                                    | 9.437417113                         | 0.010378953                               | 0.099977813                                        |
| 3.250176582                 | 0.008172086                                    | 19.98420863                         | 0.008361117                               | 0.074762139                                        |
| 3.901487918                 | 0.002557084                                    | 33.81931923                         | 0.002628118                               | 0.053069023                                        |
| -1.750521619                | 0.001945327                                    | 12.80273467                         | 0.002038928                               | 0.092898491                                        |
| -1.924250886                | 0.01545298                                     | 14.55331853                         | 0.015853084                               | 0.077602895                                        |
| -0.673049022                | 0.002478521                                    | 20.14593266                         | 0.002565755                               | 0.077187862                                        |
| -0.262451683                | 0.003589746                                    | 16.33583571                         | 0.003753007                               | 0.096328975                                        |
| 7.341271939                 | 0.004306491                                    | 24.91888104                         | 0.004457243                               | 0.063740719                                        |
| -1.251008837                | 0.002875711                                    | 37.50358044                         | 0.002962573                               | 0.051019632                                        |
| 10.52619145                 | 0.003854664                                    | 26.20910918                         | 0.003967234                               | 0.058793265                                        |
| 0.250715656                 | 0.002414                                       | 25.45304607                         | 0.002500531                               | 0.067075111                                        |
| 1.661612274                 | 0.003450633                                    | 16.36434424                         | 0.003646471                               | 0.097851686                                        |
| -0.225669801                | 0.002530387                                    | 12.00938106                         | 0.002698544                               | 0.111382845                                        |
| 6.929821846                 | 0.002423756                                    | 32.9477877                          | 0.002517805                               | 0.064089345                                        |
| -7.695931755                | 0.005005543                                    | 19.271499                           | 0.005142753                               | 0.071020946                                        |
| 9.496567349                 | 0.001467146                                    | 24.91195994                         | 0.001532657                               | 0.07123675                                         |
| -0.647210412                | 0.003241955                                    | 12.13405468                         | 0.003435563                               | 0.107101757                                        |
| 0.732111016                 | 0.004537507                                    | 16.0412449                          | 0.004692167                               | 0.076096682                                        |
| -0.728754617                | 0.003092357                                    | 10.42413799                         | 0.003259785                               | 0.100530108                                        |
| 11.50768854                 | 0.003339347                                    | 32.97489882                         | 0.003408548                               | 0.050049122                                        |
| -12.06950943                | 0.005067211                                    | 33.3450411                          | 0.005195766                               | 0.054199606                                        |
| 8.473463752                 | 0.003284682                                    | 25.76749503                         | 0.003411918                               | 0.063089468                                        |
| 0.792607971                 | 0.001219714                                    | 30.88388628                         | 0.001259993                               | 0.070768677                                        |
| -0.497518743                | 0.005284057                                    | 12.74647193                         | 0.005504651                               | 0.091396214                                        |
| -0.49784167                 | 0.004662645                                    | 18.51590618                         | 0.004815972                               | 0.078048474                                        |
| -2.295782159                | 0.017698198                                    | 8.782904379                         | 0.018339091                               | 0.109792901                                        |
| 5.561773591                 | 0.001843708                                    | 30.62567043                         | 0.001906181                               | 0.055210041                                        |
| -6.020387475                | 0.002191225                                    | 30.89594648                         | 0.002244554                               | 0.05396252                                         |
| 1.215866235                 | 0.005322003                                    | 13.47274642                         | 0.005546686                               | 0.084265233                                        |
| -6.433025066                | 0.003243712                                    | 14.33190835                         | 0.003372763                               | 0.09522824                                         |
| -0.864607911                | 0.006517796                                    | 15.25609358                         | 0.006748711                               | 0.080160986                                        |
| -13.64231455                | 0.003078106                                    | 25.45654358                         | 0.0031675                                 | 0.061835282                                        |
| 7.33282581                  | 0.004542107                                    | 20.9556059                          | 0.004706551                               | 0.071087434                                        |
| 15.41730275                 | 0.002609933                                    | 35.2355387                          | 0.002702533                               | 0.052526219                                        |
| -1.261399592                | 0.002744718                                    | 23.02843846                         | 0.002825064                               | 0.068382049                                        |
| -3.190878151                | 0.001826956                                    | 22.01599806                         | 0.001909341                               | 0.071687947                                        |
| 13.31752003                 | 0.003270785                                    | 34.16058346                         | 0.003371888                               | 0.051697652                                        |
| 0.406128459                 | 0.003491184                                    | 16.36282645                         | 0.003625031                               | 0.079150555                                        |
| 11.30005543                 | 0.002792765                                    | 17.31756483                         | 0.002925505                               | 0.077974055                                        |
| 3.918827152                 | 0.002660428                                    | 24.81895917                         | 0.002746244                               | 0.06269953                                         |
| 0.458018442                 | 0.005305853                                    | 10.99220442                         | 0.005590359                               | 0.119056486                                        |
| -4.343242648                | 0.002488497                                    | 24.1300374                          | 0.002589008                               | 0.071755892                                        |
| 0.252605377                 | 0.003290859                                    | 30.37868725                         | 0.003377925                               | 0.054332997                                        |
| 12.13469926                 | 0.001622627                                    | 33.75181856                         | 0.001668253                               | 0.057076504                                        |
| -1.278756481                | 0.002474063                                    | 18.58948477                         | 0.00256575                                | 0.07543907                                         |
| -9.584176333                | 0.008239682                                    | 17.05283959                         | 0.008549678                               | 0.07081493                                         |
| 2.702236079                 | 0.003261879                                    | 31.53595077                         | 0.003377927                               | 0.064336551                                        |
| -9.169330101                | 0.002377805                                    | 28.70451383                         | 0.002470489                               | 0.063655456                                        |
| -0.967880881                | 0.004706181                                    | 11.62657601                         | 0.004953505                               | 0.101037517                                        |
| -3.150547039                | 0.002396003                                    | 24.07269575                         | 0.002472168                               | 0.06599185                                         |
| 5.49023718                  | 0.002534098                                    | 22.13735119                         | 0.002659254                               | 0.073033438                                        |
| -0.304767568                | 0.003940984                                    | 33.29407281                         | 0.004068271                               | 0.058611995                                        |
| 5.1945044                   | 0.00120462                                     | 47.14041359                         | 0.001238797                               | 0.067598716                                        |
| -1.180509278                | 0.004337249                                    | 10.92273948                         | 0.0045498                                 | 0.1104425                                          |
| -0.807234608                | 0.005380622                                    | 17.78134916                         | 0.005559675                               | 0.073478798                                        |
| 6.625262247                 | 0.003049072                                    | 21.97249181                         | 0.003142577                               | 0.064197431                                        |
| -0.241458784                | 0.002589804                                    | 39.13794354                         | 0.002641699                               | 0.051743604                                        |
| -1.098732659                | 0.004111859                                    | 14.92268989                         | 0.004316422                               | 0.09478344                                         |
| -1.26308058                 | 0.004427094                                    | 19.7908328                          | 0.004585525                               | 0.080995699                                        |
| 0.710008164                 | 0.004369813                                    | 10.1584918                          | 0.004585959                               | 0.09317835                                         |
| 5.905962012                 | 0.003435735                                    | 33.04226672                         | 0.003557859                               | 0.050500055                                        |
| -0.699672572                | 0.011304762                                    | 2.246318704                         | 0.013003848                               | 0.216277186                                        |
| -1.533759671                | 0.002168946                                    | 26.48367602                         | 0.002236219                               | 0.058475555                                        |
| -3.178099072                | 0.002731383                                    | 14.12380691                         | 0.002868794                               | 0.093656821                                        |
| -2.911932001                | 0.002544125                                    | 19.62088439                         | 0.002626091                               | 0.078099301                                        |
| 1.589122576                 | 0.005717894                                    | 9.013607653                         | 0.006074632                               | 0.117008387                                        |
| -2.02865976                 | 0.009142419                                    | 6.683506526                         | 0.009738528                               | 0.131383711                                        |
| 17.2079442                  | 0.002754786                                    | 33.34099839                         | 0.002834455                               | 0.056040572                                        |
| 3.649276316                 | 0.002063317                                    | 26.74231671                         | 0.002136054                               | 0.060115969                                        |
| 7.786049096                 | 0.007986602                                    | 18.97132661                         | 0.008244406                               | 0.068924252                                        |
| 1.587118817                 | 0.004322082                                    | 18.1040265                          | 0.004475046                               | 0.071919167                                        |
| -5.206978216                | 0.001504612                                    | 31.74373914                         | 0.001551784                               | 0.058844608                                        |
| -0.168869705                | 0.00862934                                     | 11.37972592                         | 0.009013161                               | 0.096015597                                        |
| -1.461527852                | 0.004002194                                    | 17.02762016                         | 0.004164504                               | 0.098274355                                        |
| 0.300457124                 | 0.013147453                                    | 6.924136383                         | 0.013892717                               | 0.126540606                                        |
| 5.178297483                 | 0.002087588                                    | 29.75871606                         | 0.002180822                               | 0.064386449                                        |

| wavelet.HLH_glrIm_RunVariance | wavelet.HLH_glrIm_GrayLevelNonUniformity | wavelet.HLH_glrIm_LongRunEmphasis | wavelet.HLH_glrIm_ShortRunHighGrayLevelEmphasis | wavelet.HLH_glrIm_RunLengthNonUniformity |
|-------------------------------|------------------------------------------|-----------------------------------|-------------------------------------------------|------------------------------------------|
| 0.049778738                   | 105.9609945                              | 1.14417808                        | 664.188387                                      | 1861.142494                              |
| 0.072084093                   | 57.62766042                              | 1.208899422                       | 539.3096257                                     | 776.2933897                              |
| 0.091118842                   | 103.3794689                              | 1.258340427                       | 389.5183239                                     | 1228.337869                              |
| 0.107208967                   | 83.81519389                              | 1.301613789                       | 185.3241235                                     | 759.8295139                              |
| 0.077613515                   | 185.2464465                              | 1.224037768                       | 338.1077556                                     | 1941.651706                              |
| 0.050963191                   | 35.50004268                              | 1.150565545                       | 890.8477662                                     | 574.2261158                              |
| 0.076113795                   | 320.9259903                              | 1.213143572                       | 710.243332                                      | 4699.999939                              |
| 0.100022302                   | 422.7034488                              | 1.28377283                        | 765.4188153                                     | 4013.157655                              |
| 0.077672722                   | 318.8174665                              | 1.225176235                       | 500.1804181                                     | 3727.908808                              |
| 0.076707547                   | 91.5053012                               | 1.224064494                       | 157.4919672                                     | 878.6164324                              |
| 0.120098647                   | 145.9962047                              | 1.342424935                       | 156.0472938                                     | 1133.973266                              |
| 0.07005536                    | 160.7230441                              | 1.200749613                       | 350.7270772                                     | 1930.90312                               |
| 0.158858551                   | 219.0207816                              | 1.449582629                       | 200.3379777                                     | 1301.968629                              |
| 0.074034053                   | 112.8273491                              | 1.213636338                       | 426.2224488                                     | 1421.28533                               |
| 0.084810556                   | 153.305934                               | 1.24245368                        | 454.8949872                                     | 1608.739703                              |
| 0.107812909                   | 318.8547104                              | 1.303817581                       | 393.3530782                                     | 3392.28067                               |
| 0.064362571                   | 83.46443028                              | 1.186620691                       | 496.6927962                                     | 1010.160568                              |
| 0.144920681                   | 133.3498204                              | 1.402271694                       | 347.7246248                                     | 892.3988228                              |
| 0.070646735                   | 84.13664414                              | 1.203674538                       | 318.6692592                                     | 1087.103034                              |
| 0.092061399                   | 419.4230485                              | 1.260776684                       | 374.5060334                                     | 4156.315892                              |
| 0.146017212                   | 306.7202894                              | 1.403747059                       | 252.1159328                                     | 2191.701409                              |
| 0.066658315                   | 75.9895509                               | 1.195670984                       | 367.7286487                                     | 904.4056109                              |
| 0.062290288                   | 67.94707165                              | 1.184993481                       | 346.2073645                                     | 864.0620478                              |
| 0.074161498                   | 166.6105489                              | 1.212255271                       | 393.976049                                      | 2196.294801                              |
| 0.099410919                   | 116.8785688                              | 1.286904104                       | 152.8434118                                     | 994.8257997                              |
| 0.074728645                   | 166.1354468                              | 1.212113707                       | 283.9210286                                     | 1968.537312                              |
| 0.060631084                   | 162.5096098                              | 1.175861728                       | 616.2856209                                     | 2759.322899                              |
| 0.095972846                   | 236.606724                               | 1.273317866                       | 622.1356358                                     | 2185.627937                              |
| 0.066033046                   | 32.77384639                              | 1.187081738                       | 138.5445193                                     | 379.5613585                              |
| 0.076883961                   | 148.104408                               | 1.224395991                       | 588.9931675                                     | 1683.015044                              |
| 0.115190516                   | 417.7902967                              | 1.320887152                       | 498.1760049                                     | 3651.825909                              |
| 0.070372662                   | 123.7378827                              | 1.206997839                       | 361.4731246                                     | 1716.566473                              |
| 0.062399511                   | 155.8582323                              | 1.180914986                       | 965.1048087                                     | 2746.718362                              |
| 0.060503544                   | 130.7742879                              | 1.177602989                       | 405.6244033                                     | 2000.001835                              |
| 0.071708665                   | 277.7469424                              | 1.203519497                       | 553.1424861                                     | 3684.882918                              |
| 0.125786693                   | 265.4059338                              | 1.350725888                       | 371.5045022                                     | 2251.273611                              |
| 0.135688391                   | 372.4480984                              | 1.376674023                       | 438.717467                                      | 2744.461929                              |
| 0.102058779                   | 304.8548274                              | 1.281217388                       | 657.675972                                      | 4092.197941                              |
| 0.062127515                   | 82.60995762                              | 1.180806895                       | 335.9457931                                     | 1044.378613                              |
| 0.085729374                   | 481.5358197                              | 1.243221267                       | 814.8612947                                     | 5889.973818                              |
| 0.119878159                   | 251.8447407                              | 1.339293483                       | 364.9021675                                     | 1956.117744                              |
| 0.066279236                   | 277.3885799                              | 1.192516934                       | 309.9449893                                     | 3254.737735                              |
| 0.098906135                   | 337.5804086                              | 1.284868667                       | 366.5555788                                     | 2863.004136                              |
| 0.047302652                   | 119.1205474                              | 1.140520148                       | 541.7327558                                     | 2182.640007                              |
| 0.054512599                   | 65.8869173                               | 1.160361861                       | 382.3363712                                     | 1103.408415                              |
| 0.075810276                   | 162.0311426                              | 1.219461818                       | 439.305244                                      | 2262.31217                               |
| 0.072360439                   | 302.8147324                              | 1.209883487                       | 1168.030132                                     | 3785.471892                              |
| 0.084543936                   | 73.84187625                              | 1.247667262                       | 271.0186984                                     | 699.4619884                              |
| 0.073512619                   | 62.26054616                              | 1.212856872                       | 344.8414131                                     | 705.5266536                              |
| 0.101870741                   | 135.9821907                              | 1.295577035                       | 109.6183709                                     | 1048.360575                              |
| 0.069218044                   | 133.4434984                              | 1.200283628                       | 764.6939399                                     | 2152.206301                              |
| 0.046627298                   | 174.2959275                              | 1.136347364                       | 648.6199667                                     | 2973.754029                              |
| 0.077404904                   | 355.4409954                              | 1.222627796                       | 243.4832976                                     | 3710.186902                              |
| 0.108003676                   | 96.22546103                              | 1.305179338                       | 474.5514571                                     | 856.5117086                              |
| 0.08175066                    | 99.30084106                              | 1.235868951                       | 241.9432713                                     | 1082.275369                              |
| 0.058824325                   | 114.2256465                              | 1.173639563                       | 486.5598153                                     | 1663.247971                              |
| 0.080657358                   | 268.6601943                              | 1.227096151                       | 356.1087289                                     | 3325.692325                              |
| 0.067858724                   | 171.1518395                              | 1.194970387                       | 545.9743062                                     | 2909.633636                              |
| 0.064998089                   | 106.4189972                              | 1.18667783                        | 549.8187249                                     | 1394.676146                              |
| 0.089529591                   | 608.8006307                              | 1.245931033                       | 632.1716124                                     | 7430.781611                              |
| 0.046978191                   | 87.30830047                              | 1.140961646                       | 591.7555113                                     | 1546.833125                              |
| 0.075298818                   | 197.9054273                              | 1.216441394                       | 379.1891912                                     | 2206.294385                              |
| 0.08710058                    | 418.756977                               | 1.250055285                       | 432.7592114                                     | 4658.085465                              |
| 0.059591893                   | 452.4374201                              | 1.176046273                       | 517.2373561                                     | 6485.885858                              |
| 0.131600824                   | 84.6809081                               | 1.369255744                       | 263.4921358                                     | 585.1804261                              |
| 0.082434598                   | 258.2732192                              | 1.234752617                       | 504.5777093                                     | 3149.974288                              |
| 0.05342076                    | 67.4369626                               | 1.157811663                       | 520.0718649                                     | 1127.562233                              |
| 0.05923523                    | 338.068152                               | 1.173081881                       | 895.7631771                                     | 5338.744945                              |
| 0.066526558                   | 416.4515889                              | 1.192751632                       | 501.0938286                                     | 4928.489129                              |
| 0.077424987                   | 191.7175871                              | 1.223934404                       | 206.4231976                                     | 2375.81188                               |
| 0.068161658                   | 78.80779666                              | 1.193330897                       | 659.9676492                                     | 1096.304429                              |
| 0.071099711                   | 256.6105685                              | 1.203967196                       | 730.3802255                                     | 3581.742425                              |
| 0.110350753                   | 210.4971368                              | 1.309125898                       | 265.0397225                                     | 1762.669891                              |
| 0.061067506                   | 141.0110599                              | 1.179014187                       | 594.1896148                                     | 1918.491652                              |
| 0.102221458                   | 210.1789941                              | 1.28774014                        | 506.8000227                                     | 2459.264982                              |
| 0.05704764                    | 74.5896976                               | 1.170014156                       | 564.0852494                                     | 1147.446429                              |
| 0.077311549                   | 151.7678064                              | 1.21734304                        | 1404.6894                                       | 1986.571581                              |
| 0.119575584                   | 95.96327062                              | 1.337078788                       | 327.5150305                                     | 724.1645582                              |
| 0.069919471                   | 118.0754451                              | 1.198859457                       | 276.6993144                                     | 1432.705519                              |
| 0.060085554                   | 142.1032994                              | 1.177372968                       | 475.9584108                                     | 1989.001986                              |
| 0.046657569                   | 98.67796997                              | 1.134857409                       | 668.2340062                                     | 1759.018236                              |
| 0.11513019                    | 155.4102121                              | 1.32151971                        | 332.5851219                                     | 1379.793313                              |
| 0.09330689                    | 245.1966157                              | 1.261198968                       | 414.3000065                                     | 2622.494452                              |
| 0.087587494                   | 265.3701319                              | 1.253089481                       | 268.3534705                                     | 2464.009451                              |
| 0.062982214                   | 116.3842527                              | 1.184350384                       | 466.0526858                                     | 2067.046734                              |
| 0.320299046                   | 267.4628214                              | 1.873407068                       | 78.36332534                                     | 847.8671354                              |
| 0.061508842                   | 131.9860975                              | 1.178526744                       | 647.4238197                                     | 2030.796248                              |
| 0.104113832                   | 235.8371844                              | 1.291239845                       | 442.9298165                                     | 2147.777009                              |
| 0.085248561                   | 106.4531117                              | 1.239903786                       | 630.3160321                                     | 1191.288148                              |
| 0.122298787                   | 214.3059352                              | 1.347589986                       | 206.1980732                                     | 1520.086419                              |
| 0.151374319                   | 151.7598584                              | 1.42911435                        | 147.0796675                                     | 922.5586914                              |
| 0.054936619                   | 126.9363681                              | 1.161302436                       | 551.5791869                                     | 2055.00514                               |
| 0.06121265                    | 294.7755659                              | 1.178838576                       | 609.8963069                                     | 4405.750855                              |
| 0.070576146                   | 213.5631355                              | 1.205778166                       | 227.9890326                                     | 2744.859027                              |
| 0.064551361                   | 295.1497894                              | 1.189510475                       | 313.1103385                                     | 3663.247369                              |
| 0.064289592                   | 190.2810186                              | 1.184960582                       | 911.8088319                                     | 2902.379582                              |
| 0.096453413                   | 249.0280172                              | 1.277672923                       | 182.1444403                                     | 2217.009083                              |
| 0.114593409                   | 93.81991658                              | 1.318788661                       | 406.2472395                                     | 803.9228929                              |
| 0.135359183                   | 94.7849434                               | 1.378878405                       | 108.835849                                      | 613.6630452                              |
| 0.083303526                   | 346.3555288                              | 1.236684047                       | 656.9493506                                     | 4707.954471                              |



| wavelet.HLH_glrIm_ShortRunEmphasis | wavelet.HLH_glrIm_LongRunHighGrayLevelEmphasis | wavelet.HLH_glrIm_RunPercentage | wavelet.HLH_glrIm_LongRunLowGrayLevelEmphasis | wavelet.HLH_glrIm_RunEntropy |
|------------------------------------|------------------------------------------------|---------------------------------|-----------------------------------------------|------------------------------|
| 0.967180517                        | 781.5738458                                    | 0.95606467                      | 0.002834284                                   | 4.841160374                  |
| 0.953350157                        | 682.6529844                                    | 0.938214726                     | 0.006258171                                   | 4.675189273                  |
| 0.944417626                        | 509.9917791                                    | 0.926035503                     | 0.004485253                                   | 4.471432035                  |
| 0.937196701                        | 252.8023646                                    | 0.915675931                     | 0.01389138                                    | 4.232664592                  |
| 0.950376867                        | 430.5960521                                    | 0.934121622                     | 0.004717253                                   | 4.268205418                  |
| 0.965038187                        | 1061.977835                                    | 0.953846154                     | 0.003218192                                   | 4.737775098                  |
| 0.954070705                        | 898.6174105                                    | 0.938050447                     | 0.002065874                                   | 4.666177642                  |
| 0.93954625                         | 1044.84994                                     | 0.919598217                     | 0.001973124                                   | 4.312772388                  |
| 0.950159627                        | 639.4696702                                    | 0.934007919                     | 0.003112789                                   | 4.474424848                  |
| 0.949953096                        | 200.887443                                     | 0.934055683                     | 0.011128963                                   | 4.082459293                  |
| 0.928351607                        | 224.5564902                                    | 0.905529484                     | 0.011328982                                   | 4.004822443                  |
| 0.95568252                         | 436.1459708                                    | 0.94069748                      | 0.004952932                                   | 4.453731224                  |
| 0.909571507                        | 313.6271352                                    | 0.881339871                     | 0.008504621                                   | 3.930139039                  |
| 0.952702699                        | 537.7086416                                    | 0.937009991                     | 0.004203258                                   | 4.563670807                  |
| 0.947441026                        | 592.6900942                                    | 0.929900744                     | 0.003710142                                   | 4.382497605                  |
| 0.93634166                         | 541.8222911                                    | 0.914973281                     | 0.004348284                                   | 4.500012342                  |
| 0.958125331                        | 612.3684755                                    | 0.944208221                     | 0.003612993                                   | 4.336196546                  |
| 0.919426082                        | 529.7349799                                    | 0.892382557                     | 0.004948593                                   | 3.958825468                  |
| 0.955296862                        | 396.7623061                                    | 0.940322389                     | 0.006927124                                   | 4.533823065                  |
| 0.944136426                        | 495.6658403                                    | 0.925281489                     | 0.004275946                                   | 4.30369722                   |
| 0.919807053                        | 385.4537505                                    | 0.892450142                     | 0.006823553                                   | 4.070625669                  |
| 0.95563248                         | 459.0341746                                    | 0.941470022                     | 0.004920914                                   | 4.379181373                  |
| 0.957272371                        | 426.0056748                                    | 0.944035457                     | 0.005252264                                   | 4.406067312                  |
| 0.953274087                        | 496.4771277                                    | 0.937665281                     | 0.004448089                                   | 4.600139685                  |
| 0.938163778                        | 208.7840668                                    | 0.918242794                     | 0.012408932                                   | 4.032068606                  |
| 0.953732343                        | 355.8692612                                    | 0.937948501                     | 0.009219273                                   | 4.453384893                  |
| 0.960310025                        | 753.1356325                                    | 0.947155535                     | 0.002940383                                   | 4.844397141                  |
| 0.941390011                        | 836.4309073                                    | 0.922102156                     | 0.002473778                                   | 4.197766556                  |
| 0.959159491                        | 171.2849377                                    | 0.944759938                     | 0.01763617                                    | 4.213045967                  |
| 0.949878393                        | 754.3741017                                    | 0.934012434                     | 0.002954789                                   | 4.429048058                  |
| 0.933960173                        | 571.8956616                                    | 0.91137194                      | 0.004542087                                   | 4.302633248                  |
| 0.953106408                        | 452.3288496                                    | 0.938245901                     | 0.0051196                                     | 4.636440941                  |
| 0.959315537                        | 690.8085468                                    | 0.94604188                      | 0.003344929                                   | 4.91721995                   |
| 0.95945466                         | 497.2583958                                    | 0.946481178                     | 0.004457449                                   | 4.666910794                  |
| 0.955492849                        | 692.0748943                                    | 0.940211696                     | 0.002892428                                   | 4.617921794                  |
| 0.928461163                        | 535.3098112                                    | 0.904173186                     | 0.004600823                                   | 4.313921099                  |
| 0.924065911                        | 649.242473                                     | 0.898476423                     | 0.003530036                                   | 4.122436966                  |
| 0.942113663                        | 886.9185531                                    | 0.921541741                     | 0.002969979                                   | 4.829226626                  |
| 0.959021611                        | 412.2414553                                    | 0.945653533                     | 0.005743602                                   | 4.413728189                  |
| 0.947417199                        | 1063.171973                                    | 0.929764046                     | 0.00183434                                    | 4.608742715                  |
| 0.929227949                        | 520.0982594                                    | 0.906351936                     | 0.004360409                                   | 4.129423695                  |
| 0.956755035                        | 383.1006124                                    | 0.94263094                      | 0.005377327                                   | 4.337632859                  |
| 0.938730292                        | 498.3950633                                    | 0.919075997                     | 0.00403595                                    | 4.082855636                  |
| 0.96707801                         | 637.998596                                     | 0.956622558                     | 0.003703544                                   | 4.805501614                  |
| 0.963096916                        | 454.8275645                                    | 0.951185747                     | 0.005745003                                   | 4.787686066                  |
| 0.951352609                        | 556.2835797                                    | 0.935631218                     | 0.003985007                                   | 4.672319466                  |
| 0.953244302                        | 1474.703699                                    | 0.937898358                     | 0.001440399                                   | 4.605584079                  |
| 0.944906125                        | 351.524629                                     | 0.92758103                      | 0.006493513                                   | 4.156499836                  |
| 0.952831289                        | 431.8104605                                    | 0.937358763                     | 0.00550578                                    | 4.369377206                  |
| 0.935939263                        | 150.1062735                                    | 0.916021848                     | 0.021272633                                   | 3.95283854                   |
| 0.955438522                        | 956.4454091                                    | 0.940833009                     | 0.002185999                                   | 4.794104876                  |
| 0.968535908                        | 758.1408614                                    | 0.95814983                      | 0.002475023                                   | 4.742257194                  |
| 0.950937653                        | 309.8151849                                    | 0.934840426                     | 0.006560562                                   | 4.239033645                  |
| 0.936234819                        | 663.1415804                                    | 0.914994426                     | 0.003989403                                   | 4.206782563                  |
| 0.948280115                        | 312.25387                                      | 0.9313476                       | 0.007795613                                   | 4.322088041                  |
| 0.96003357                         | 593.7518418                                    | 0.947337278                     | 0.003553275                                   | 4.622186693                  |
| 0.951119745                        | 456.5678356                                    | 0.934239802                     | 0.005455847                                   | 4.527956569                  |
| 0.956699215                        | 676.2431855                                    | 0.94229657                      | 0.003118452                                   | 4.884959579                  |
| 0.958325738                        | 675.5771052                                    | 0.944314787                     | 0.003183091                                   | 4.53039647                   |
| 0.948864456                        | 825.9025316                                    | 0.930205516                     | 0.00230321                                    | 4.567709181                  |
| 0.966629263                        | 694.886297                                     | 0.956311525                     | 0.00379114                                    | 4.793392913                  |
| 0.952257521                        | 480.907003                                     | 0.936416018                     | 0.004228418                                   | 4.348550731                  |
| 0.945584346                        | 566.2116931                                    | 0.927661214                     | 0.003534497                                   | 4.416685934                  |
| 0.959451919                        | 630.2129884                                    | 0.946598856                     | 0.003118648                                   | 4.624695342                  |
| 0.924648888                        | 385.0674184                                    | 0.900097371                     | 0.006984966                                   | 3.966431279                  |
| 0.949067686                        | 696.9656336                                    | 0.93190057                      | 0.003048675                                   | 4.58825066                   |
| 0.963469595                        | 616.5616003                                    | 0.951805907                     | 0.003751517                                   | 4.732284788                  |
| 0.960521883                        | 1091.360762                                    | 0.94768                         | 0.001867711                                   | 4.788087448                  |
| 0.956774279                        | 620.5102776                                    | 0.942527679                     | 0.002973454                                   | 4.40757455                   |
| 0.950232051                        | 262.3970683                                    | 0.934172108                     | 0.009931611                                   | 4.432925224                  |
| 0.957650238                        | 815.5370958                                    | 0.942973885                     | 0.003879981                                   | 4.691015521                  |
| 0.954936569                        | 918.4916862                                    | 0.939698763                     | 0.002873664                                   | 4.697717856                  |
| 0.935803359                        | 367.664086                                     | 0.91403112                      | 0.006142001                                   | 4.134590963                  |
| 0.959086745                        | 724.969755                                     | 0.945891647                     | 0.002802889                                   | 4.565390949                  |
| 0.939601211                        | 689.5312921                                    | 0.919072304                     | 0.003251626                                   | 4.60053982                   |
| 0.960515155                        | 678.643967                                     | 0.948240284                     | 0.004601438                                   | 4.740302733                  |
| 0.953257545                        | 1777.075365                                    | 0.936914088                     | 0.001397247                                   | 4.769362471                  |
| 0.92991673                         | 467.3608439                                    | 0.90693753                      | 0.005566844                                   | 4.028374529                  |
| 0.956247826                        | 343.9060131                                    | 0.941372629                     | 0.006371985                                   | 4.383371674                  |
| 0.959229195                        | 580.3455118                                    | 0.946361035                     | 0.003548304                                   | 4.53880985                   |
| 0.969265664                        | 778.680522                                     | 0.958773253                     | 0.002870375                                   | 4.844243621                  |
| 0.933704753                        | 465.2351973                                    | 0.911189977                     | 0.005306996                                   | 4.277427995                  |
| 0.944903197                        | 549.2246357                                    | 0.925947714                     | 0.005317902                                   | 4.44734481                   |
| 0.944548893                        | 353.0710915                                    | 0.926756615                     | 0.005570124                                   | 4.078805055                  |
| 0.958266439                        | 542.8184005                                    | 0.944933295                     | 0.004100769                                   | 4.85115416                   |
| 0.85117335                         | 171.2735633                                    | 0.806738301                     | 0.022918282                                   | 3.375465647                  |
| 0.959744739                        | 790.4436944                                    | 0.94636349                      | 0.002532921                                   | 4.679656095                  |
| 0.939053057                        | 605.2317806                                    | 0.918251697                     | 0.003522609                                   | 4.23530002                   |
| 0.948525718                        | 819.8377891                                    | 0.930958386                     | 0.003007317                                   | 4.42070206                   |
| 0.92792956                         | 295.533442                                     | 0.904387464                     | 0.007788089                                   | 3.964869806                  |
| 0.913151104                        | 227.853507                                     | 0.885736196                     | 0.012663824                                   | 3.84002042                   |
| 0.962957251                        | 657.9961322                                    | 0.950913906                     | 0.003179037                                   | 4.779598685                  |
| 0.959318567                        | 744.065308                                     | 0.94605144                      | 0.002454611                                   | 4.680842358                  |
| 0.953705079                        | 285.1340163                                    | 0.938951049                     | 0.009392101                                   | 4.475036235                  |
| 0.956796865                        | 386.295973                                     | 0.942997031                     | 0.005144817                                   | 4.420693287                  |
| 0.95878899                         | 1120.918166                                    | 0.944881536                     | 0.00176262                                    | 4.765751289                  |
| 0.939856912                        | 245.1844833                                    | 0.92067393                      | 0.010760361                                   | 4.140428369                  |
| 0.934184261                        | 569.2825119                                    | 0.911689075                     | 0.004947519                                   | 4.260637695                  |
| 0.922947585                        | 160.0795006                                    | 0.897899301                     | 0.017539572                                   | 3.835371709                  |
| 0.948930129                        | 847.9783933                                    | 0.931576563                     | 0.002604462                                   | 4.740214941                  |

| wavelet.HLH_glrIm_HighGrayLevelRunEmphasis | wavelet.HLH_glrIm_RunLengthNonUniformityNormalized | wavelet.HLH_glszm_GrayLevelVariance | wavelet.HLH_glszm_SmallAreaHighGrayLevelEmphasis |
|--------------------------------------------|----------------------------------------------------|-------------------------------------|--------------------------------------------------|
| 686.0416012                                | 0.917186241                                        | 51.42861059                         | 516.679312                                       |
| 565.4106541                                | 0.884581843                                        | 49.07260755                         | 411.6512318                                      |
| 410.8788277                                | 0.86429649                                         | 29.743534                           | 305.7343535                                      |
| 196.9640314                                | 0.848716328                                        | 27.9722334                          | 158.0217739                                      |
| 354.8439758                                | 0.877604233                                        | 26.53872172                         | 268.6720635                                      |
| 923.0759014                                | 0.911898813                                        | 48.84891308                         | 683.2394157                                      |
| 743.6308113                                | 0.886383068                                        | 34.8942164                          | 526.3354156                                      |
| 814.3983502                                | 0.853864521                                        | 30.48811549                         | 594.5917389                                      |
| 525.4337148                                | 0.877459606                                        | 34.88096308                         | 392.3477511                                      |
| 165.3989295                                | 0.876945396                                        | 18.2224346                          | 120.2369466                                      |
| 167.9091305                                | 0.829425362                                        | 15.73987345                         | 113.1714064                                      |
| 366.1777302                                | 0.890198912                                        | 32.45625194                         | 288.2345134                                      |
| 219.3000836                                | 0.790189771                                        | 21.86179045                         | 173.2192127                                      |
| 446.4613258                                | 0.883137131                                        | 41.40371725                         | 349.2493542                                      |
| 479.4503234                                | 0.871459291                                        | 34.07267529                         | 365.4275184                                      |
| 419.091719                                 | 0.84664982                                         | 34.33220609                         | 310.1139777                                      |
| 517.8801091                                | 0.89574403                                         | 25.154376                           | 366.6272367                                      |
| 378.0397164                                | 0.810485963                                        | 20.54424848                         | 262.7307566                                      |
| 332.7587281                                | 0.889805967                                        | 35.89220208                         | 249.387249                                       |
| 395.8771043                                | 0.863716175                                        | 29.18177031                         | 296.8362753                                      |
| 274.1630438                                | 0.811393931                                        | 21.96665897                         | 191.7394628                                      |
| 384.6499896                                | 0.889918415                                        | 28.59491976                         | 261.5684156                                      |
| 361.256555                                 | 0.893520202                                        | 28.68063696                         | 256.7288845                                      |
| 412.4837263                                | 0.884543019                                        | 35.40515219                         | 306.5765203                                      |
| 162.7490061                                | 0.850488913                                        | 18.1191393                          | 115.4998753                                      |
| 296.8041475                                | 0.885623159                                        | 32.49452219                         | 232.6721039                                      |
| 641.4849429                                | 0.900838211                                        | 48.19455973                         | 462.8204861                                      |
| 659.9222435                                | 0.857671765                                        | 23.96772196                         | 473.7222903                                      |
| 144.3730328                                | 0.898457571                                        | 21.13253518                         | 100.0975587                                      |
| 619.1871982                                | 0.876720695                                        | 33.20920009                         | 443.296994                                       |
| 436.1241957                                | 0.841533598                                        | 34.32011489                         | 334.0681731                                      |
| 378.2737965                                | 0.883948519                                        | 38.25001915                         | 280.721979                                       |
| 588.1426352                                | 0.898631984                                        | 51.64118936                         | 447.0205573                                      |
| 422.6556858                                | 0.898804347                                        | 36.03914176                         | 296.7365847                                      |
| 578.0291075                                | 0.889661598                                        | 39.5293765                          | 442.7625214                                      |
| 399.2818101                                | 0.829630216                                        | 33.19128362                         | 309.9412102                                      |
| 474.0520112                                | 0.820202005                                        | 28.47394969                         | 360.821806                                       |
| 696.9184946                                | 0.859767938                                        | 54.8335617                          | 510.5930575                                      |
| 349.9810139                                | 0.897677118                                        | 29.25915638                         | 251.9732687                                      |
| 858.9758668                                | 0.871075326                                        | 42.51243423                         | 624.7119378                                      |
| 391.6885404                                | 0.831242079                                        | 27.791901                           | 298.8304291                                      |
| 323.3736753                                | 0.892534256                                        | 24.66227329                         | 236.3524159                                      |
| 389.8914085                                | 0.851945441                                        | 20.01240524                         | 283.9038879                                      |
| 560.0520853                                | 0.916794974                                        | 42.14222809                         | 400.0205946                                      |
| 395.7903104                                | 0.907396048                                        | 46.91051007                         | 322.5656592                                      |
| 460.6001781                                | 0.880251983                                        | 39.15412023                         | 335.8541511                                      |
| 1223.893722                                | 0.884404068                                        | 54.24962555                         | 904.3621781                                      |
| 285.6833046                                | 0.865360622                                        | 22.27503633                         | 218.7889148                                      |
| 360.6471284                                | 0.883868861                                        | 29.35065836                         | 287.712237                                       |
| 116.8257327                                | 0.84572688                                         | 18.246236                           | 92.27795703                                      |
| 799.6052746                                | 0.889806953                                        | 42.38177601                         | 572.8997736                                      |
| 669.189367                                 | 0.920440919                                        | 41.67120151                         | 501.1590967                                      |
| 255.4861504                                | 0.879187939                                        | 22.51316007                         | 184.3198973                                      |
| 507.1973655                                | 0.846838657                                        | 29.08552404                         | 370.7344714                                      |
| 254.5571999                                | 0.873204348                                        | 27.16307386                         | 190.608005                                       |
| 506.6011241                                | 0.90008025                                         | 35.89878133                         | 362.7242838                                      |
| 373.9317793                                | 0.879695509                                        | 33.20226971                         | 269.6494819                                      |
| 569.7157805                                | 0.892525142                                        | 49.85729376                         | 407.6389829                                      |
| 572.7474208                                | 0.896063052                                        | 36.77811248                         | 421.2893215                                      |
| 665.527173                                 | 0.874747638                                        | 35.34598593                         | 482.1515565                                      |
| 611.5416287                                | 0.915647951                                        | 43.90324421                         | 451.1851615                                      |
| 397.5475838                                | 0.882124794                                        | 27.43847147                         | 296.3181061                                      |
| 456.665608                                 | 0.866996326                                        | 29.38429028                         | 331.8318126                                      |
| 538.4179778                                | 0.898608928                                        | 36.54990573                         | 395.187243                                       |
| 284.1288417                                | 0.821853675                                        | 25.76653061                         | 215.7712787                                      |
| 568.4357292                                | 0.874892938                                        | 42.40925982                         | 436.6026329                                      |
| 538.1768179                                | 0.908201829                                        | 40.66722318                         | 413.5788111                                      |
| 932.0998287                                | 0.901170819                                        | 50.4623356                          | 679.1256783                                      |
| 522.9826446                                | 0.892520886                                        | 28.97886201                         | 396.9736397                                      |
| 216.5926966                                | 0.877304561                                        | 25.03162222                         | 159.6039295                                      |
| 687.9732554                                | 0.894737849                                        | 46.47231698                         | 514.7986885                                      |
| 764.4178263                                | 0.888291498                                        | 45.49277615                         | 569.1420377                                      |
| 282.7168528                                | 0.845553762                                        | 23.56739764                         | 211.4513347                                      |
| 618.4896883                                | 0.897712348                                        | 36.6587097                          | 470.1967298                                      |
| 538.5096307                                | 0.853969222                                        | 37.24560015                         | 378.1541644                                      |
| 585.7217126                                | 0.901289579                                        | 48.12657601                         | 451.3897456                                      |
| 1470.626978                                | 0.884616946                                        | 80.83712441                         | 1135.053663                                      |
| 351.5657923                                | 0.832796922                                        | 24.70789931                         | 255.3479708                                      |
| 288.825746                                 | 0.891348676                                        | 26.73988464                         | 208.2468044                                      |
| 495.4677253                                | 0.898210866                                        | 31.59402376                         | 361.699195                                       |
| 688.8064532                                | 0.922222949                                        | 51.43368792                         | 524.2585582                                      |
| 355.3534519                                | 0.841030181                                        | 28.46033349                         | 270.7580238                                      |
| 437.8204685                                | 0.865785093                                        | 34.30457876                         | 328.1806334                                      |
| 283.6162568                                | 0.864684209                                        | 17.65024495                         | 200.2342662                                      |
| 463.9870775                                | 0.896250461                                        | 42.5210269                          | 348.1861141                                      |
| 91.88768091                                | 0.682546205                                        | 7.992620408                         | 55.733056                                        |
| 673.7055706                                | 0.899514309                                        | 37.33881102                         | 492.5400577                                      |
| 471.0164                                   | 0.852575864                                        | 27.74088558                         | 352.2836427                                      |
| 663.8339018                                | 0.873718687                                        | 33.7243361                          | 488.5594455                                      |
| 221.5637879                                | 0.829013879                                        | 19.73081464                         | 167.7994603                                      |
| 160.7011668                                | 0.797705557                                        | 15.82732696                         | 117.9709329                                      |
| 571.4317489                                | 0.907016617                                        | 47.05848808                         | 447.7342473                                      |
| 634.7769429                                | 0.89834761                                         | 39.01599125                         | 464.756397                                       |
| 238.5408418                                | 0.885417412                                        | 27.80432802                         | 166.3045169                                      |
| 326.7211613                                | 0.892408502                                        | 27.53224647                         | 235.6805343                                      |
| 949.8918667                                | 0.897343195                                        | 47.60252105                         | 720.1656646                                      |
| 193.3718195                                | 0.854233671                                        | 20.73945694                         | 140.455708                                       |
| 434.1996159                                | 0.841831309                                        | 33.21858291                         | 307.4531166                                      |
| 117.5264052                                | 0.818242485                                        | 15.56882302                         | 80.577434                                        |
| 690.859677                                 | 0.87479263                                         | 47.88561226                         | 525.287686                                       |

| wavelet.HLH_glszm_GrayLevelNonUniformityNormalized | wavelet.HLH_glszm_SizeZoneNonUniformityNormalized | wavelet.HLH_glszm_SizeZoneNonUniformity | wavelet.HLH_glszm_GrayLevelNonUniformity |
|----------------------------------------------------|---------------------------------------------------|-----------------------------------------|------------------------------------------|
| 0.041901945                                        | 0.490781654                                       | 592.8642384                             | 50.61754967                              |
| 0.046746333                                        | 0.493630689                                       | 216.7038724                             | 20.52164009                              |
| 0.053206127                                        | 0.422843322                                       | 257.9344262                             | 32.4557377                               |
| 0.061370596                                        | 0.427262502                                       | 149.1146132                             | 21.41833811                              |
| 0.058128056                                        | 0.422885413                                       | 395.397861                              | 54.34973262                              |
| 0.044880408                                        | 0.513213294                                       | 187.8360656                             | 16.42622951                              |
| 0.048588946                                        | 0.428666591                                       | 1085.812475                             | 123.0757994                              |
| 0.055731981                                        | 0.474957063                                       | 906.693033                              | 106.392352                               |
| 0.05105351                                         | 0.460313412                                       | 918.7855711                             | 101.9028056                              |
| 0.066389462                                        | 0.420574641                                       | 177.9030733                             | 28.08274232                              |
| 0.072226784                                        | 0.404604697                                       | 182.4767184                             | 32.57427938                              |
| 0.052374384                                        | 0.484853899                                       | 512.9754253                             | 55.4120983                               |
| 0.069845018                                        | 0.435964468                                       | 201.4155844                             | 32.26839827                              |
| 0.04623487                                         | 0.493307431                                       | 375.9002625                             | 35.23097113                              |
| 0.053461144                                        | 0.461389873                                       | 367.727729                              | 42.60853199                              |
| 0.051312455                                        | 0.423740972                                       | 664.8495857                             | 80.50924156                              |
| 0.059200835                                        | 0.433087617                                       | 241.2298025                             | 32.97486535                              |
| 0.074953114                                        | 0.401151135                                       | 131.9787234                             | 24.65957447                              |
| 0.049629182                                        | 0.437164333                                       | 261.8614357                             | 29.7278798                               |
| 0.058141349                                        | 0.443945044                                       | 876.3475177                             | 114.7710233                              |
| 0.065607592                                        | 0.430878932                                       | 354.1824818                             | 53.92944039                              |
| 0.053723031                                        | 0.41494314                                        | 201.2474227                             | 26.0556701                               |
| 0.055275051                                        | 0.418729256                                       | 199.3151261                             | 26.31092437                              |
| 0.04922064                                         | 0.46525705                                        | 566.683087                              | 59.95073892                              |
| 0.070736773                                        | 0.397465518                                       | 164.5507246                             | 29.28502415                              |
| 0.05214551                                         | 0.481344877                                       | 520.8151571                             | 56.42144177                              |
| 0.041463088                                        | 0.472277791                                       | 759.8949658                             | 66.71410814                              |
| 0.061083947                                        | 0.430814237                                       | 432.10668                               | 61.2671984                               |
| 0.062708581                                        | 0.452215921                                       | 93.60869565                             | 12.98067633                              |
| 0.053678634                                        | 0.438263085                                       | 384.7949886                             | 47.12984055                              |
| 0.054838993                                        | 0.47169342                                        | 768.388582                              | 89.33271946                              |
| 0.047589407                                        | 0.416161916                                       | 380.3719912                             | 43.49671772                              |
| 0.040595431                                        | 0.474982122                                       | 774.2208589                             | 66.17055215                              |
| 0.047503526                                        | 0.447883073                                       | 519.9922481                             | 55.15159345                              |
| 0.046685976                                        | 0.488776866                                       | 1013.234443                             | 96.78002894                              |
| 0.055524737                                        | 0.477418036                                       | 482.669634                              | 56.1355094                               |
| 0.062901563                                        | 0.485970827                                       | 519.988785                              | 67.3046729                               |
| 0.040767528                                        | 0.46822853                                        | 1009.968938                             | 87.93555865                              |
| 0.054704805                                        | 0.435620982                                       | 251.7889273                             | 31.61937716                              |
| 0.047792623                                        | 0.448524287                                       | 1362.168258                             | 145.1461969                              |
| 0.06086381                                         | 0.450042649                                       | 355.0836502                             | 48.02154626                              |
| 0.056897443                                        | 0.440697118                                       | 780.0338983                             | 100.7084746                              |
| 0.067001643                                        | 0.436393073                                       | 552.9100237                             | 84.89108129                              |
| 0.043346067                                        | 0.474294922                                       | 651.6812227                             | 59.55749636                              |
| 0.042402899                                        | 0.487980272                                       | 323.5309201                             | 28.11312217                              |
| 0.046568595                                        | 0.421199798                                       | 500.8065601                             | 55.37005887                              |
| 0.046854555                                        | 0.470192837                                       | 965.3058938                             | 96.19240136                              |
| 0.063234906                                        | 0.402843837                                       | 140.1896552                             | 22.00574713                              |
| 0.0563641                                          | 0.47946442                                        | 187.4705882                             | 22.03836317                              |
| 0.07035594                                         | 0.459080586                                       | 207.5044248                             | 31.80088496                              |
| 0.043995637                                        | 0.45097124                                        | 544.3222867                             | 53.10273405                              |
| 0.044554172                                        | 0.491053271                                       | 935.9475341                             | 84.92025184                              |
| 0.059638008                                        | 0.424332612                                       | 784.1666667                             | 110.211039                               |
| 0.059621536                                        | 0.50929154                                        | 199.1329923                             | 23.31202046                              |
| 0.056615858                                        | 0.441734382                                       | 245.6043165                             | 31.47841727                              |
| 0.048394499                                        | 0.449542281                                       | 444.1477733                             | 47.81376518                              |
| 0.050659163                                        | 0.441360536                                       | 784.7390326                             | 90.071991                                |
| 0.041621556                                        | 0.420214543                                       | 665.199621                              | 65.88692356                              |
| 0.048617209                                        | 0.451982054                                       | 357.0658228                             | 38.40759494                              |
| 0.048841846                                        | 0.46005195                                        | 1878.392114                             | 199.4212589                              |
| 0.044285945                                        | 0.46815936                                        | 449.9011446                             | 42.55879292                              |
| 0.054825585                                        | 0.461648421                                       | 523.0476611                             | 62.11738747                              |
| 0.054710154                                        | 0.443391486                                       | 1014.923111                             | 125.2315422                              |
| 0.048198184                                        | 0.454252968                                       | 1679.827474                             | 178.2368848                              |
| 0.069620991                                        | 0.446997085                                       | 109.5142857                             | 17.05714286                              |
| 0.04603495                                         | 0.473868927                                       | 778.5666464                             | 75.63542301                              |
| 0.045622837                                        | 0.448239619                                       | 304.8029412                             | 31.02352941                              |
| 0.043244545                                        | 0.471861527                                       | 1486.36381                              | 136.2203175                              |
| 0.055085891                                        | 0.485901085                                       | 1342.544698                             | 152.2023163                              |
| 0.055761111                                        | 0.410965278                                       | 493.1583333                             | 66.91333333                              |
| 0.046205756                                        | 0.478705012                                       | 314.0304878                             | 30.31097561                              |
| 0.04466229                                         | 0.487290629                                       | 960.9371197                             | 88.07403651                              |
| 0.063208125                                        | 0.447473532                                       | 339.6324111                             | 47.97496706                              |
| 0.049282152                                        | 0.471143222                                       | 507.8923933                             | 53.12615955                              |
| 0.047890196                                        | 0.414308645                                       | 485.1554227                             | 56.0794193                               |
| 0.044503997                                        | 0.466493423                                       | 323.2799423                             | 30.84126984                              |
| 0.042384122                                        | 0.489768948                                       | 546.0923767                             | 47.25829596                              |
| 0.067153742                                        | 0.427637924                                       | 123.1597222                             | 19.34027778                              |
| 0.056639629                                        | 0.429863662                                       | 340.4520202                             | 44.85858586                              |
| 0.050807649                                        | 0.447116887                                       | 512.8430689                             | 58.27637315                              |
| 0.042093255                                        | 0.510906575                                       | 597.2497861                             | 49.20701454                              |
| 0.055158096                                        | 0.47979968                                        | 313.7889908                             | 36.0733945                               |
| 0.052411426                                        | 0.477985748                                       | 653.8845029                             | 71.69883041                              |
| 0.068529175                                        | 0.417132172                                       | 463.4338434                             | 76.13591359                              |
| 0.043340042                                        | 0.431439508                                       | 509.5300593                             | 51.18458933                              |
| 0.137436735                                        | 0.326432653                                       | 57.12571429                             | 24.05142857                              |
| 0.046957571                                        | 0.452586811                                       | 528.1688089                             | 54.79948586                              |
| 0.059427472                                        | 0.465739093                                       | 464.8076152                             | 59.30861723                              |
| 0.054693878                                        | 0.464389015                                       | 292.5650794                             | 34.45714286                              |
| 0.073109926                                        | 0.429087957                                       | 264.3181818                             | 45.03571429                              |
| 0.083894765                                        | 0.446347247                                       | 145.5092025                             | 27.34969325                              |
| 0.0442589                                          | 0.488786045                                       | 595.8301887                             | 53.95159967                              |
| 0.046503986                                        | 0.457172275                                       | 1138.816138                             | 115.8414291                              |
| 0.054418334                                        | 0.382927426                                       | 532.6520489                             | 75.69590223                              |
| 0.054812933                                        | 0.440565495                                       | 887.2989076                             | 110.3932473                              |
| 0.042656721                                        | 0.489087064                                       | 831.9370958                             | 72.55908289                              |
| 0.063010381                                        | 0.425322953                                       | 433.8294118                             | 64.27058824                              |
| 0.057739145                                        | 0.450407323                                       | 170.2539683                             | 21.82539683                              |
| 0.077037543                                        | 0.394920469                                       | 88.06726457                             | 17.1793722                               |
| 0.043794409                                        | 0.459706113                                       | 1174.549119                             | 111.8947162                              |

| wavelet.HLH_glszm_LargeAreaEmphasis | wavelet.HLH_glszm_ZoneVariance | wavelet.HLH_glszm_ZonePercentage | wavelet.HLH_glszm_LargeAreaLowGrayLevelEmphasis | wavelet.HLH_glszm_LargeAreaHighGrayLevelEmphasis |
|-------------------------------------|--------------------------------|----------------------------------|-------------------------------------------------|--------------------------------------------------|
| 6.869205298                         | 3.783482632                    | 0.56927427                       | 0.012626248                                     | 4639.36755                                       |
| 21.46013667                         | 16.92391592                    | 0.469518717                      | 0.047890067                                     | 12239.73121                                      |
| 29.97704918                         | 23.65306101                    | 0.397653194                      | 0.084911836                                     | 11321.98033                                      |
| 67.91117479                         | 60.07438363                    | 0.357215967                      | 0.42093369                                      | 12172                                            |
| 30.84705882                         | 24.43289313                    | 0.394847973                      | 0.096236232                                     | 10436.07914                                      |
| 6.956284153                         | 3.704470125                    | 0.554545455                      | 0.011618281                                     | 6353.907104                                      |
| 39.05763916                         | 34.08049483                    | 0.44823925                       | 0.056435275                                     | 27936.38216                                      |
| 113.1660555                         | 106.0064364                    | 0.373727486                      | 0.141165894                                     | 91677.22734                                      |
| 32.01202405                         | 26.82476677                    | 0.439067312                      | 0.066863751                                     | 15913.27455                                      |
| 29.69267139                         | 23.27010155                    | 0.394589552                      | 0.201756976                                     | 4783.565012                                      |
| 106.6252772                         | 95.44507647                    | 0.299071618                      | 0.677500814                                     | 17479.09091                                      |
| 18.46219282                         | 13.71572518                    | 0.459002169                      | 0.058206973                                     | 6429.623819                                      |
| 548.9242424                         | 532.5935468                    | 0.247455811                      | 2.60306555                                      | 116851.0541                                      |
| 25.97244094                         | 20.8951664                     | 0.443797321                      | 0.065719438                                     | 11038.17979                                      |
| 39.56587202                         | 33.36908325                    | 0.40171371                       | 0.087065232                                     | 18752.76788                                      |
| 104.7673678                         | 96.988637                      | 0.358546618                      | 0.267810561                                     | 42007.11727                                      |
| 12.92639138                         | 8.331256507                    | 0.466499162                      | 0.028642143                                     | 6628.281867                                      |
| 294.4711246                         | 280.4257167                    | 0.266828873                      | 0.77506085                                      | 112993.383                                       |
| 17.01168614                         | 12.31603591                    | 0.461479199                      | 0.063066967                                     | 5332.041736                                      |
| 62.89817629                         | 55.96159727                    | 0.379688402                      | 0.169457586                                     | 24006.70821                                      |
| 584.5012165                         | 570.9674108                    | 0.271825397                      | 2.114962255                                     | 163017.2774                                      |
| 15.96082474                         | 11.01134658                    | 0.449490269                      | 0.047624682                                     | 6004.443299                                      |
| 14.29411765                         | 9.66619589                     | 0.46484375                       | 0.046421411                                     | 5018.855042                                      |
| 29.13382594                         | 24.4108764                     | 0.460143559                      | 0.10805341                                      | 11264.58292                                      |
| 67.45169082                         | 57.99680856                    | 0.325216025                      | 0.443539951                                     | 10972.83816                                      |
| 32.94731978                         | 28.15356737                    | 0.456732799                      | 0.131871036                                     | 9176.007394                                      |
| 12.845867                           | 8.808489846                    | 0.497680173                      | 0.023234865                                     | 8170.712244                                      |
| 87.44965105                         | 79.86657376                    | 0.36314265                       | 0.137425591                                     | 56528.44666                                      |
| 12.71014493                         | 8.047048939                    | 0.463087248                      | 0.118938509                                     | 1843.342995                                      |
| 31.43963554                         | 25.96680694                    | 0.427458617                      | 0.055698967                                     | 18648.33371                                      |
| 297.1233886                         | 288.5922557                    | 0.342370744                      | 0.704422096                                     | 126577.8042                                      |
| 14.99890591                         | 9.874676201                    | 0.441759304                      | 0.048584248                                     | 5378.098468                                      |
| 10.50368098                         | 6.579392902                    | 0.504800248                      | 0.022503432                                     | 5972.738037                                      |
| 11.36089578                         | 7.263845581                    | 0.494042553                      | 0.032327557                                     | 4760.499569                                      |
| 29.36999518                         | 24.85667632                    | 0.470708447                      | 0.055347704                                     | 16304.27545                                      |
| 318.4678536                         | 309.668503                     | 0.337112371                      | 0.827468962                                     | 123640.4837                                      |
| 629.8775701                         | 617.7840763                    | 0.287557108                      | 1.340102397                                     | 297721.8159                                      |
| 64.14510895                         | 58.42021524                    | 0.417942259                      | 0.099179961                                     | 43069.88781                                      |
| 12.62629758                         | 8.097795764                    | 0.469918699                      | 0.042369883                                     | 4490.363322                                      |
| 54.06124465                         | 48.33091986                    | 0.417744154                      | 0.065701128                                     | 45412.41159                                      |
| 290.0760456                         | 279.2670352                    | 0.304163454                      | 0.754765105                                     | 112413.5108                                      |
| 16.75423729                         | 11.98112324                    | 0.457719162                      | 0.060574426                                     | 5106.09435                                       |
| 70.93528019                         | 62.62250349                    | 0.346838215                      | 0.19013376                                      | 27012.05762                                      |
| 6.192139738                         | 2.913246421                    | 0.552250804                      | 0.015238783                                     | 3373.033479                                      |
| 9.185520362                         | 5.469871624                    | 0.518779343                      | 0.03320043                                      | 3348.832579                                      |
| 22.10513036                         | 16.77520671                    | 0.433151184                      | 0.058566672                                     | 9176.597981                                      |
| 22.79980516                         | 17.86201463                    | 0.45002192                       | 0.020200104                                     | 27198.72772                                      |
| 21.27873563                         | 15.01439596                    | 0.399540758                      | 0.087577949                                     | 5620.181034                                      |
| 18.36061381                         | 13.62358959                    | 0.459459459                      | 0.06130165                                      | 6103.971867                                      |
| 108.6504425                         | 99.70346151                    | 0.334319527                      | 1.025806928                                     | 12202.46903                                      |
| 20.05053853                         | 15.5203772                     | 0.46983262                       | 0.028616809                                     | 15198.63463                                      |
| 6.407660021                         | 3.279624238                    | 0.565410857                      | 0.011598183                                     | 4169.863064                                      |
| 31.62337662                         | 25.662169                      | 0.409574468                      | 0.138502706                                     | 7679.568182                                      |
| 108.8081841                         | 100.8358658                    | 0.354166667                      | 0.222409236                                     | 54497.29156                                      |
| 32.93884892                         | 27.21677191                    | 0.418045113                      | 0.143711742                                     | 8102.419065                                      |
| 10.60121457                         | 6.705785212                    | 0.506666667                      | 0.024430172                                     | 5285.452429                                      |
| 30.57311586                         | 25.39736291                    | 0.439555006                      | 0.091776145                                     | 11147.58211                                      |
| 16.0315856                          | 11.2597206                     | 0.457779063                      | 0.033731469                                     | 8592.88187                                       |
| 15.67594937                         | 11.3242365                     | 0.479368932                      | 0.031039727                                     | 8663.925316                                      |
| 66.54543228                         | 61.54638028                    | 0.447255997                      | 0.103641706                                     | 43345.03943                                      |
| 6.574401665                         | 3.197373963                    | 0.54416761                       | 0.017440155                                     | 3892.224766                                      |
| 47.66990291                         | 42.116455                      | 0.424344569                      | 0.13049001                                      | 17992.70962                                      |
| 42.33158585                         | 35.93548189                    | 0.395405079                      | 0.103284446                                     | 18005.53386                                      |
| 11.13277447                         | 6.883468283                    | 0.485110849                      | 0.0242847                                       | 5777.589508                                      |
| 121.5918367                         | 111.1945023                    | 0.310126582                      | 0.444666951                                     | 33989.17551                                      |
| 68.42483262                         | 62.8996147                     | 0.42542724                       | 0.128529806                                     | 37303.92514                                      |
| 7.594117647                         | 3.916747405                    | 0.521472393                      | 0.019129438                                     | 3838.263235                                      |
| 11.12952381                         | 7.19276392                     | 0.504                            | 0.013475162                                     | 10285.23841                                      |
| 21.55881288                         | 17.0652722                     | 0.471743213                      | 0.044265774                                     | 11031.94028                                      |
| 24.6                                | 18.767775                      | 0.414078675                      | 0.139062339                                     | 5153.9775                                        |
| 19.73932927                         | 15.81820484                    | 0.505003849                      | 0.037909111                                     | 12704.30793                                      |
| 26.40365112                         | 21.67104061                    | 0.45967366                       | 0.041407327                                     | 19737.04158                                      |
| 110.6916996                         | 101.6758824                    | 0.333040807                      | 0.40553657                                      | 30891.28986                                      |
| 14.28293135                         | 9.891612827                    | 0.477202302                      | 0.026506543                                     | 8503.910946                                      |
| 72.62766866                         | 65.47855264                    | 0.374001916                      | 0.141725522                                     | 38360.12126                                      |
| 8.230880231                         | 4.480817243                    | 0.516393443                      | 0.023038892                                     | 4546.692641                                      |
| 32.4735426                          | 27.85586197                    | 0.465358932                      | 0.024490926                                     | 45393.81973                                      |
| 128.3888889                         | 117.3240258                    | 0.300626305                      | 0.377965132                                     | 44670.74653                                      |
| 14.38005051                         | 9.734719353                    | 0.46397188                       | 0.058842687                                     | 3991.736111                                      |
| 10.6652136                          | 6.506743265                    | 0.490380504                      | 0.025623494                                     | 5082.309503                                      |
| 6.408041061                         | 3.513094549                    | 0.587732529                      | 0.011939922                                     | 4339.682635                                      |
| 169.646789                          | 162.0800835                    | 0.363535297                      | 0.507132365                                     | 57555.263                                        |
| 48.14108187                         | 42.43079869                    | 0.418476598                      | 0.122882405                                     | 20216.5731                                       |
| 46.23492349                         | 38.58429695                    | 0.361535958                      | 0.175228643                                     | 12703.71287                                      |
| 9.613039797                         | 5.347992954                    | 0.484214842                      | 0.0289632196                                    | 4193.101609                                      |
| 2786.594286                         | 2709.956767                    | 0.114229765                      | 31.18897697                                     | 252313.5829                                      |
| 11.69065981                         | 7.513942766                    | 0.489308176                      | 0.0201151666                                    | 7602.281919                                      |
| 124.2765531                         | 116.7278244                    | 0.363967907                      | 0.272788526                                     | 57368.3507                                       |
| 32.28571429                         | 26.88562358                    | 0.430327869                      | 0.052167795                                     | 21152.4873                                       |
| 249.0568182                         | 238.2502293                    | 0.304197531                      | 1.188403361                                     | 52838.26136                                      |
| 434.3312883                         | 418.3312883                    | 0.25                             | 2.847784235                                     | 67341.88037                                      |
| 9.335520919                         | 5.517167678                    | 0.511754828                      | 0.020567589                                     | 5047.849877                                      |
| 18.95102369                         | 14.62175079                    | 0.480609686                      | 0.033581242                                     | 11353.055                                        |
| 14.31488138                         | 8.686628273                    | 0.421515152                      | 0.081352877                                     | 3218.253055                                      |
| 17.29096326                         | 12.62158732                    | 0.462775735                      | 0.061519232                                     | 5314.407646                                      |
| 15.82010582                         | 11.77293642                    | 0.49707732                       | 0.018290445                                     | 14715.23339                                      |
| 54.36372549                         | 46.7363812                     | 0.362087327                      | 0.314849369                                     | 10020.22647                                      |
| 108.6746032                         | 101.0025825                    | 0.361031519                      | 0.264310116                                     | 45798.91534                                      |
| 157.7130045                         | 143.7260753                    | 0.267386091                      | 1.46815112                                      | 17625.49776                                      |
| 40.61213307                         | 35.50506378                    | 0.442500866                      | 0.064056079                                     | 27092.05636                                      |

| wavelet.HLH_glszm_HighGrayLevelZoneEmphasis | wavelet.HLH_glszm_SmallAreaEmphasis | wavelet.HLH_glszm_LowGrayLevelZoneEmphasis | wavelet.HLH_glszm_ZoneEntropy | wavelet.HLH_glszm_SmallAreaLowGrayLevelEmphasis |
|---------------------------------------------|-------------------------------------|--------------------------------------------|-------------------------------|-------------------------------------------------|
| 699.4850993                                 | 0.728346169                         | 0.003183493                                | 6.248520075                   | 0.002683063                                     |
| 566.0911162                                 | 0.730078712                         | 0.009204715                                | 6.021407181                   | 0.00835008                                      |
| 440.2377049                                 | 0.675932826                         | 0.004963862                                | 6.095171392                   | 0.004022353                                     |
| 218.0802292                                 | 0.679353643                         | 0.0139498                                  | 5.829622472                   | 0.00889075                                      |
| 378.6930481                                 | 0.676230432                         | 0.005086364                                | 6.057621327                   | 0.003962822                                     |
| 924.2650273                                 | 0.744013091                         | 0.004298654                                | 5.978643904                   | 0.003974883                                     |
| 759.6154757                                 | 0.680730918                         | 0.002025588                                | 6.367675803                   | 0.00152761                                      |
| 822.4284966                                 | 0.716502247                         | 0.002118282                                | 6.069096879                   | 0.00173969                                      |
| 544.0886774                                 | 0.705503886                         | 0.003260715                                | 6.183883155                   | 0.002611087                                     |
| 172.9101655                                 | 0.674247177                         | 0.012300965                                | 5.773866849                   | 0.009516999                                     |
| 172.2949002                                 | 0.660824438                         | 0.013350055                                | 5.849027698                   | 0.010786548                                     |
| 385.8109641                                 | 0.723714962                         | 0.005386964                                | 6.083446748                   | 0.004354721                                     |
| 241.6969697                                 | 0.68601145                          | 0.009405404                                | 5.740756848                   | 0.007601616                                     |
| 466.5643045                                 | 0.729735972                         | 0.004859069                                | 6.104338475                   | 0.004085389                                     |
| 499.1053952                                 | 0.706348282                         | 0.004278246                                | 6.095890894                   | 0.003520616                                     |
| 441.6309751                                 | 0.677075478                         | 0.004761267                                | 6.369838769                   | 0.003763544                                     |
| 528.540395                                  | 0.684381957                         | 0.004342495                                | 5.93260959                    | 0.003652963                                     |
| 388.5075988                                 | 0.6585345                           | 0.006346398                                | 5.731384771                   | 0.005302281                                     |
| 350.8213689                                 | 0.687389632                         | 0.00820598                                 | 6.134156901                   | 0.007582903                                     |
| 415.3221884                                 | 0.69304042                          | 0.0045834                                  | 6.124760682                   | 0.003627072                                     |
| 276.6447689                                 | 0.682675303                         | 0.007637065                                | 5.902177121                   | 0.005802322                                     |
| 390.771134                                  | 0.669559892                         | 0.005878387                                | 6.025653255                   | 0.004823023                                     |
| 372.6428571                                 | 0.672305858                         | 0.006124469                                | 5.98872873                    | 0.004994478                                     |
| 425.9055829                                 | 0.709288638                         | 0.004759817                                | 6.179471551                   | 0.003794797                                     |
| 170.1111111                                 | 0.655515833                         | 0.015479377                                | 5.788220697                   | 0.012071007                                     |
| 313.2892791                                 | 0.721198158                         | 0.012780239                                | 6.047760818                   | 0.011463287                                     |
| 645.6612803                                 | 0.714691126                         | 0.003359451                                | 6.399559121                   | 0.002789411                                     |
| 681.2791625                                 | 0.682383897                         | 0.002703116                                | 5.978542868                   | 0.002173065                                     |
| 144.0531401                                 | 0.698227139                         | 0.02210493                                 | 5.533504338                   | 0.018608096                                     |
| 635.6936219                                 | 0.688527581                         | 0.003524718                                | 6.158741609                   | 0.002956038                                     |
| 456.5481891                                 | 0.714159329                         | 0.005804599                                | 6.117171953                   | 0.005006083                                     |
| 400.1236324                                 | 0.670617126                         | 0.005753284                                | 6.365557915                   | 0.004554928                                     |
| 608.3116564                                 | 0.716711458                         | 0.003641912                                | 6.439429879                   | 0.002960075                                     |
| 425.7019811                                 | 0.695338377                         | 0.00500532                                 | 6.209293672                   | 0.004065956                                     |
| 597.040521                                  | 0.726801541                         | 0.003014146                                | 6.208796926                   | 0.002415406                                     |
| 418.1038576                                 | 0.718257181                         | 0.005007327                                | 6.059158648                   | 0.004044151                                     |
| 491.5280374                                 | 0.724504501                         | 0.003664869                                | 5.895575265                   | 0.002983156                                     |
| 713.7065369                                 | 0.711375542                         | 0.003521356                                | 6.516291906                   | 0.002948073                                     |
| 358.5121107                                 | 0.685327723                         | 0.006877359                                | 5.961598995                   | 0.005645535                                     |
| 880.9934146                                 | 0.696506958                         | 0.001870321                                | 6.415349121                   | 0.00146781                                      |
| 415.8669202                                 | 0.697680923                         | 0.004764336                                | 5.967116319                   | 0.003864271                                     |
| 336.2146893                                 | 0.690407916                         | 0.005818337                                | 6.058701605                   | 0.004631669                                     |
| 404.2280979                                 | 0.687059898                         | 0.004078748                                | 5.940361004                   | 0.003166632                                     |
| 562.4403202                                 | 0.716147713                         | 0.0043526                                  | 6.265148123                   | 0.003740205                                     |
| 423.4343891                                 | 0.726228431                         | 0.006525174                                | 6.216400888                   | 0.005405045                                     |
| 483.5517241                                 | 0.674751348                         | 0.00428391                                 | 6.384102414                   | 0.0033237                                       |
| 1252.090599                                 | 0.713107594                         | 0.001686843                                | 6.355085904                   | 0.0014302                                       |
| 312.2528736                                 | 0.659800967                         | 0.00735207                                 | 5.875174834                   | 0.00589568                                      |
| 385.7007673                                 | 0.719605759                         | 0.006387436                                | 5.782403972                   | 0.005424169                                     |
| 125.7721239                                 | 0.704487729                         | 0.032039394                                | 5.561251525                   | 0.028155055                                     |
| 814.7796189                                 | 0.698322054                         | 0.002399886                                | 6.346701084                   | 0.001962816                                     |
| 679.883001                                  | 0.728581399                         | 0.002614045                                | 6.184671267                   | 0.002126139                                     |
| 267.8728355                                 | 0.677124258                         | 0.006704888                                | 6.038059055                   | 0.005073046                                     |
| 504.3478261                                 | 0.740283766                         | 0.005452003                                | 5.734749893                   | 0.004875131                                     |
| 265.4100719                                 | 0.691022475                         | 0.009435115                                | 5.891390812                   | 0.007854387                                     |
| 513.0647773                                 | 0.696728747                         | 0.003933077                                | 6.181114425                   | 0.003174374                                     |
| 384.1428571                                 | 0.690678865                         | 0.005972052                                | 6.241937073                   | 0.004497591                                     |
| 591.102969                                  | 0.673435215                         | 0.003256952                                | 6.543483446                   | 0.002481055                                     |
| 590.5164557                                 | 0.698774213                         | 0.003684985                                | 6.163395233                   | 0.003072538                                     |
| 677.0617193                                 | 0.705459405                         | 0.002207865                                | 6.281195073                   | 0.001700166                                     |
| 627.0176899                                 | 0.711595607                         | 0.003438064                                | 6.242016939                   | 0.002069706                                     |
| 411.9514563                                 | 0.706511054                         | 0.004566324                                | 5.980473615                   | 0.003658969                                     |
| 474.1537789                                 | 0.692566835                         | 0.003561125                                | 6.220824708                   | 0.00276647                                      |
| 553.9094105                                 | 0.701030635                         | 0.003319393                                | 6.33628268                    | 0.002647158                                     |
| 301.3265306                                 | 0.694678479                         | 0.008971716                                | 5.555815688                   | 0.007738253                                     |
| 593.9872185                                 | 0.715683784                         | 0.003262576                                | 6.28240337                    | 0.002609864                                     |
| 568.7205882                                 | 0.696271284                         | 0.00417037                                 | 6.217582909                   | 0.003371117                                     |
| 943.3336508                                 | 0.714323677                         | 0.002108983                                | 6.425750963                   | 0.001762355                                     |
| 537.9605501                                 | 0.724716102                         | 0.002984139                                | 6.058107845                   | 0.002344496                                     |
| 230.285                                     | 0.666452244                         | 0.011217404                                | 6.16357674                    | 0.008856564                                     |
| 706.9466463                                 | 0.719185978                         | 0.003483153                                | 6.154952158                   | 0.001865145                                     |
| 773.8904665                                 | 0.725618925                         | 0.002620515                                | 6.315394292                   | 0.001739642                                     |
| 296.1870883                                 | 0.695593595                         | 0.006707547                                | 5.904034435                   | 0.005343331                                     |
| 643.1521336                                 | 0.713795161                         | 0.003038656                                | 6.154698522                   | 0.002437641                                     |
| 554.4099061                                 | 0.668991336                         | 0.003444764                                | 6.37836324                    | 0.002666807                                     |
| 614.4704185                                 | 0.710212655                         | 0.004418659                                | 6.263846447                   | 0.002705313                                     |
| 1526.609865                                 | 0.727532174                         | 0.001747182                                | 6.440768256                   | 0.001538049                                     |
| 367.7291667                                 | 0.679712725                         | 0.007522963                                | 5.780120015                   | 0.006459134                                     |
| 299.114899                                  | 0.681086609                         | 0.006970112                                | 6.003592093                   | 0.005524567                                     |
| 510.467306                                  | 0.695404526                         | 0.003913773                                | 6.142764842                   | 0.00318327                                      |
| 699.4388366                                 | 0.743032008                         | 0.003221376                                | 6.189169657                   | 0.002754235                                     |
| 371.6727829                                 | 0.719953141                         | 0.006033267                                | 5.901379492                   | 0.005025552                                     |
| 449.9517544                                 | 0.718874252                         | 0.006360553                                | 6.102678498                   | 0.005012338                                     |
| 294.5985599                                 | 0.67059731                          | 0.005591741                                | 5.840467041                   | 0.004204264                                     |
| 490.0889077                                 | 0.683076621                         | 0.004153441                                | 6.434059966                   | 0.003186981                                     |
| 96.78285714                                 | 0.584413968                         | 0.021032094                                | 5.009893028                   | 0.015766789                                     |
| 692.1636675                                 | 0.699731886                         | 0.00275024                                 | 6.268639095                   | 0.002290668                                     |
| 486.6362725                                 | 0.709554491                         | 0.003760227                                | 5.935102194                   | 0.003050855                                     |
| 677.8365079                                 | 0.707591937                         | 0.003805419                                | 6.001443393                   | 0.003304035                                     |
| 236.6233766                                 | 0.68106061                          | 0.008120411                                | 5.753572529                   | 0.00629143                                      |
| 167.3588957                                 | 0.694279179                         | 0.016618079                                | 5.40514184                    | 0.013920303                                     |
| 598.4027892                                 | 0.726704016                         | 0.003420814                                | 6.310944758                   | 0.002805631                                     |
| 653.9803292                                 | 0.703139209                         | 0.002463315                                | 6.319362278                   | 0.001911672                                     |
| 250.3738318                                 | 0.642852846                         | 0.011319718                                | 6.356558256                   | 0.009024955                                     |
| 336.8659384                                 | 0.690203025                         | 0.005398666                                | 6.130043904                   | 0.004232482                                     |
| 974.430923                                  | 0.72714015                          | 0.001904941                                | 6.320946301                   | 0.001575686                                     |
| 201.5892157                                 | 0.678182959                         | 0.012537402                                | 5.981066055                   | 0.009470833                                     |
| 443.2275132                                 | 0.697268987                         | 0.006686394                                | 5.900080657                   | 0.005843481                                     |
| 123.058296                                  | 0.648977631                         | 0.023599537                                | 5.503049862                   | 0.019619122                                     |
| 722.339726                                  | 0.704924554                         | 0.002040313                                | 6.442551204                   | 0.001583255                                     |



| wavelet.HHH_gldm_HighGrayLevelEmphasis | wavelet.HHH_gldm_GrayLevelNonUniformityNormalized | wavelet.HHH_gldm_DependenceEntropy | wavelet.HHH_gldm_DependenceNonUniformity |
|----------------------------------------|---------------------------------------------------|------------------------------------|------------------------------------------|
| 979.1088596                            | 0.052547656                                       | 6.358518518                        | 628.9792648                              |
| 406.9101604                            | 0.07142898                                        | 6.005271521                        | 241.4663102                              |
| 328.8422425                            | 0.075319273                                       | 6.196807941                        | 345.5423729                              |
| 191.6489253                            | 0.122350395                                       | 5.748206672                        | 158.8976459                              |
| 1015.568412                            | 0.071528031                                       | 6.270485411                        | 553.4172297                              |
| 1543.79697                             | 0.047451791                                       | 6.291222978                        | 222.0484848                              |
| 398.1932401                            | 0.074726432                                       | 6.338641468                        | 1222.326491                              |
| 315.5301488                            | 0.12001059                                        | 5.964199489                        | 776.5622553                              |
| 320.6075671                            | 0.089505353                                       | 6.1400539                          | 872.125385                               |
| 191.369403                             | 0.104023377                                       | 5.913683075                        | 195.233209                               |
| 776.4933687                            | 0.113315193                                       | 6.063906626                        | 234.5145889                              |
| 434.2403471                            | 0.087441147                                       | 5.98973502                         | 481.3392625                              |
| 311.4059989                            | 0.159725954                                       | 5.806705036                        | 219.5409748                              |
| 2800.776937                            | 0.083243416                                       | 6.304883465                        | 347.7454863                              |
| 354.2620968                            | 0.098703946                                       | 5.996461793                        | 358.0635081                              |
| 1204.465037                            | 0.081095175                                       | 6.378002077                        | 851.4268739                              |
| 534.4547739                            | 0.064521379                                       | 6.158821534                        | 313.0871022                              |
| 163.1743715                            | 0.144917841                                       | 5.630085813                        | 170.3463098                              |
| 523.0724191                            | 0.084276865                                       | 6.101231008                        | 263.6348228                              |
| 613.9778804                            | 0.096855777                                       | 6.060645774                        | 949.061935                               |
| 315.3462302                            | 0.120719867                                       | 6.080828257                        | 428.0562169                              |
| 164.7034291                            | 0.100799577                                       | 5.759655206                        | 217.8192771                              |
| 445.9609375                            | 0.060796738                                       | 6.228649784                        | 274.9316406                              |
| 1522.514923                            | 0.066481946                                       | 6.558329559                        | 610.2565168                              |
| 164.2073841                            | 0.113210563                                       | 5.715094482                        | 227.1351139                              |
| 956.7847193                            | 0.071591139                                       | 6.338975132                        | 547.9067117                              |
| 735.7135787                            | 0.059355898                                       | 6.360630396                        | 843.6272812                              |
| 217.9532947                            | 0.123851369                                       | 5.838002339                        | 435.1643736                              |
| 220.8478747                            | 0.077549059                                       | 5.676210398                        | 119.6800895                              |
| 1358.610516                            | 0.062181376                                       | 6.35425294                         | 535.7721519                              |
| 519.0964691                            | 0.119563061                                       | 6.087595692                        | 697.9562842                              |
| 1529.911068                            | 0.048003381                                       | 6.627450617                        | 568.820203                               |
| 737.1907711                            | 0.061626685                                       | 6.572278971                        | 757.413131                               |
| 584.0561702                            | 0.054443096                                       | 6.357261655                        | 666.0289362                              |
| 671.8156222                            | 0.072428892                                       | 6.255618157                        | 1023.145777                              |
| 387.135045                             | 0.127226915                                       | 5.888607638                        | 437.9063021                              |
| 313.814566                             | 0.135157626                                       | 5.908777982                        | 492.8188659                              |
| 1153.807595                            | 0.071404514                                       | 6.646216328                        | 1043.857198                              |
| 671.395122                             | 0.07343909                                        | 5.993962269                        | 304.2699187                              |
| 3804.803851                            | 0.071775248                                       | 6.452909807                        | 1571.177992                              |
| 282.0227448                            | 0.117747557                                       | 5.998144426                        | 394.7255204                              |
| 250.0824929                            | 0.099877629                                       | 5.92707331                         | 728.3643651                              |
| 277.6036135                            | 0.12804681                                        | 5.8412694                          | 545.2337805                              |
| 965.7086013                            | 0.047299707                                       | 6.52842175                         | 754.0836013                              |
| 806.9546166                            | 0.05425021                                        | 6.540062789                        | 339.8935837                              |
| 575.4273224                            | 0.08661378                                        | 6.227278626                        | 542.4513661                              |
| 2585.912319                            | 0.070828707                                       | 6.404740745                        | 997.7838667                              |
| 249.3008037                            | 0.104155984                                       | 5.829446705                        | 157.8128588                              |
| 251.6815511                            | 0.098327674                                       | 5.811165849                        | 163.7708578                              |
| 246.0532544                            | 0.124049184                                       | 5.767081378                        | 218.5488166                              |
| 739.1241728                            | 0.063316687                                       | 6.530121455                        | 597.5488517                              |
| 727.6594482                            | 0.057836832                                       | 6.280284519                        | 954.8546425                              |
| 514.8067376                            | 0.105326989                                       | 5.92025286                         | 799.293883                               |
| 882.1865942                            | 0.096093258                                       | 5.957831372                        | 206.3713768                              |
| 402.0962406                            | 0.09027192                                        | 6.078695296                        | 254.8947368                              |
| 763.3733333                            | 0.071233136                                       | 6.169198481                        | 470.2912821                              |
| 1019.959456                            | 0.067869167                                       | 6.399992031                        | 933.3317676                              |
| 900.3559861                            | 0.061228671                                       | 6.441819395                        | 851.5170619                              |
| 477.0315534                            | 0.083645814                                       | 6.090722385                        | 345.5182039                              |
| 571.3327856                            | 0.075715334                                       | 6.38962785                         | 1941.189944                              |
| 590.2389581                            | 0.054381939                                       | 6.367153905                        | 493.9479049                              |
| 354.5333333                            | 0.09658152                                        | 6.010265813                        | 499.7925094                              |
| 1663.430299                            | 0.079340584                                       | 6.272911946                        | 1212.719468                              |
| 1589.454021                            | 0.059328297                                       | 6.351772945                        | 2042.359045                              |
| 59.17974684                            | 0.179996795                                       | 5.439703267                        | 94.21772152                              |
| 1020.275764                            | 0.071489028                                       | 6.392904412                        | 825.0590368                              |
| 587.1694785                            | 0.057655303                                       | 6.28240195                         | 346.7822086                              |
| 4726.7232                              | 0.057357568                                       | 6.502595988                        | 1620.33792                               |
| 1078.164077                            | 0.076279814                                       | 6.201201433                        | 1353.947584                              |
| 667.9382333                            | 0.075273826                                       | 6.205667323                        | 650.5500345                              |
| 946.604311                             | 0.078893517                                       | 6.18762115                         | 274.530408                               |
| 1287.697203                            | 0.067721975                                       | 6.310898881                        | 1037.041492                              |
| 189.2900395                            | 0.132938417                                       | 5.868001528                        | 323.1676174                              |
| 739.5515715                            | 0.062050161                                       | 6.300319364                        | 579.7729084                              |
| 1152.276589                            | 0.082828284                                       | 6.431241364                        | 582.3631428                              |
| 287.157228                             | 0.084496969                                       | 6.064654896                        | 279.052161                               |
| 1384.321786                            | 0.06299871                                        | 6.590737174                        | 565.1035058                              |
| 164.3350731                            | 0.130981385                                       | 5.776153947                        | 143.2943633                              |
| 517.9461043                            | 0.088095505                                       | 5.99299384                         | 344.5489162                              |
| 782.8401026                            | 0.057722091                                       | 6.292480038                        | 655.2206071                              |
| 984.4524887                            | 0.051646803                                       | 6.364867685                        | 610.1654098                              |
| 392.5236242                            | 0.106071837                                       | 6.115724782                        | 298.3374097                              |
| 476.0838177                            | 0.100323674                                       | 6.160277204                        | 573.2104619                              |
| 352.9453303                            | 0.096007351                                       | 6.099476357                        | 562.5698015                              |
| 549.5293153                            | 0.054423632                                       | 6.667820764                        | 599.803608                               |
| 31.19908616                            | 0.337156331                                       | 5.119998827                        | 120.4712794                              |
| 484.0083857                            | 0.069370146                                       | 6.179354537                        | 584.1505241                              |
| 476.1739606                            | 0.096900064                                       | 6.114865071                        | 510.730124                               |
| 777.9672131                            | 0.08107233                                        | 6.087276847                        | 325.0505464                              |
| 279.1333333                            | 0.133759854                                       | 5.779308691                        | 293.211358                               |
| 312.5697853                            | 0.140445632                                       | 5.766681131                        | 176.6748466                              |
| 1521.22712                             | 0.059505908                                       | 6.31670463                         | 659.8975651                              |
| 529.6006174                            | 0.065530244                                       | 6.315114138                        | 1262.245611                              |
| 826.6769697                            | 0.083743985                                       | 6.129237498                        | 709.4254545                              |
| 1082.341452                            | 0.064816802                                       | 6.373144165                        | 1059.576746                              |
| 1030.519579                            | 0.055211901                                       | 6.552860817                        | 891.1180596                              |
| 279.4408946                            | 0.125149061                                       | 5.819907155                        | 448.9744409                              |
| 189.4689589                            | 0.116648376                                       | 5.947048732                        | 157.5711557                              |
| 114.3956835                            | 0.155038559                                       | 5.597717279                        | 110.9232614                              |
| 1158.540873                            | 0.068834841                                       | 6.489472611                        | 1284.290267                              |

| wavelet.HHH_gldm_GrayLevelNonUniformity | wavelet.HHH_gldm_SmallDependenceEmphasis | wavelet.HHH_gldm_DependenceNonUniformityNormalized | wavelet.HHH_gldm_DependenceVariance |
|-----------------------------------------|------------------------------------------|----------------------------------------------------|-------------------------------------|
| 111.5061263                             | 0.518696673                              | 0.296408702                                        | 1.538829781                         |
| 66.78609626                             | 0.455800733                              | 0.258252738                                        | 1.764298665                         |
| 115.5397653                             | 0.4074139                                | 0.225255784                                        | 2.62212228                          |
| 119.5363357                             | 0.27689014                               | 0.162638327                                        | 4.192471889                         |
| 169.3783784                             | 0.433321099                              | 0.2337066                                          | 2.421212307                         |
| 31.31818182                             | 0.564731902                              | 0.336437098                                        | 1.048888889                         |
| 422.2790657                             | 0.395267068                              | 0.216302688                                        | 3.160481898                         |
| 613.0140955                             | 0.292822867                              | 0.152028633                                        | 4.944881706                         |
| 406.891333                              | 0.350139686                              | 0.191844563                                        | 3.625290209                         |
| 111.5130597                             | 0.325479647                              | 0.182120531                                        | 3.478889368                         |
| 170.8793103                             | 0.301557351                              | 0.155513653                                        | 5.309658831                         |
| 201.5518438                             | 0.37024475                               | 0.208823975                                        | 2.491456374                         |
| 298.2083557                             | 0.236944923                              | 0.117590238                                        | 7.361738813                         |
| 142.9289458                             | 0.39278716                               | 0.20253086                                         | 3.846453754                         |
| 195.828629                              | 0.337035506                              | 0.180475559                                        | 3.594309923                         |
| 354.8724863                             | 0.361258561                              | 0.194567384                                        | 3.554866331                         |
| 77.03852596                             | 0.4359591                                | 0.262217003                                        | 1.509714962                         |
| 178.6836983                             | 0.231167793                              | 0.138155969                                        | 4.579276703                         |
| 109.3913713                             | 0.369600894                              | 0.203108492                                        | 2.605964848                         |
| 503.5531833                             | 0.332009182                              | 0.182547016                                        | 3.351007734                         |
| 365.0568783                             | 0.274478365                              | 0.141552982                                        | 6.291540253                         |
| 108.7627433                             | 0.322358173                              | 0.201871434                                        | 2.319435581                         |
| 62.25585938                             | 0.445571019                              | 0.26848793                                         | 1.626708984                         |
| 175.9777106                             | 0.428359333                              | 0.230546474                                        | 3.359596061                         |
| 144.1170463                             | 0.320007485                              | 0.17842507                                         | 3.049754741                         |
| 169.599409                              | 0.439693724                              | 0.231281854                                        | 3.103721365                         |
| 191.8976183                             | 0.456597159                              | 0.260942555                                        | 1.774837263                         |
| 342.0774801                             | 0.277349578                              | 0.157554082                                        | 4.346909359                         |
| 34.66442953                             | 0.448340096                              | 0.267740692                                        | 1.631468052                         |
| 127.7205453                             | 0.471217571                              | 0.260843307                                        | 2.180149593                         |
| 568.8810425                             | 0.287538046                              | 0.146691106                                        | 5.648184576                         |
| 99.31899468                             | 0.47787666                               | 0.274925183                                        | 1.66708069                          |
| 198.9925674                             | 0.42823033                               | 0.23456585                                         | 2.60527365                          |
| 127.9412766                             | 0.477745646                              | 0.283416569                                        | 1.431369126                         |
| 318.9768392                             | 0.418837524                              | 0.232321929                                        | 2.364597744                         |
| 381.5535178                             | 0.266055218                              | 0.14601744                                         | 4.928673012                         |
| 502.9215265                             | 0.249543472                              | 0.132442587                                        | 5.937876941                         |
| 368.5186979                             | 0.381413073                              | 0.202258709                                        | 4.653645278                         |
| 90.3300813                              | 0.418836368                              | 0.247373918                                        | 1.672414568                         |
| 521.8060523                             | 0.405243675                              | 0.216118018                                        | 2.858472931                         |
| 305.4371627                             | 0.287973567                              | 0.152168666                                        | 4.784060126                         |
| 386.2267908                             | 0.325751643                              | 0.188353857                                        | 2.874657618                         |
| 467.7549959                             | 0.265284386                              | 0.149256441                                        | 4.881294181                         |
| 117.681672                              | 0.511868511                              | 0.303088264                                        | 1.281782136                         |
| 69.33176839                             | 0.466042078                              | 0.265957421                                        | 2.014640442                         |
| 237.754827                              | 0.357026186                              | 0.197614341                                        | 2.920208493                         |
| 323.1205612                             | 0.412334831                              | 0.218716323                                        | 2.65944392                          |
| 90.71986223                             | 0.302226869                              | 0.181185831                                        | 3.13076409                          |
| 83.67685076                             | 0.359817817                              | 0.192445191                                        | 2.931548009                         |
| 167.714497                              | 0.269903543                              | 0.161648533                                        | 4.333643342                         |
| 162.6605683                             | 0.424005909                              | 0.232599787                                        | 2.335764886                         |
| 194.967962                              | 0.498053993                              | 0.283255604                                        | 1.487697825                         |
| 475.2353723                             | 0.314688996                              | 0.177148467                                        | 3.340651682                         |
| 106.0869565                             | 0.34474585                               | 0.186930595                                        | 3.023547443                         |
| 120.0616541                             | 0.339851086                              | 0.191650178                                        | 3.437727401                         |
| 138.9046154                             | 0.41398465                               | 0.241175016                                        | 2.079643393                         |
| 274.5307787                             | 0.423463703                              | 0.230737149                                        | 2.740105458                         |
| 211.7287449                             | 0.429186181                              | 0.246245536                                        | 1.981399533                         |
| 137.848301                              | 0.385070931                              | 0.209659104                                        | 2.85522316                          |
| 691.2052799                             | 0.39830075                               | 0.212639933                                        | 3.907280202                         |
| 96.0385051                              | 0.490370664                              | 0.2796987                                          | 1.638694403                         |
| 257.8726592                             | 0.334356605                              | 0.187188206                                        | 3.155560605                         |
| 459.3026429                             | 0.379464322                              | 0.209486866                                        | 2.760808057                         |
| 452.2596091                             | 0.468382458                              | 0.267920641                                        | 1.604221736                         |
| 142.1974684                             | 0.201423973                              | 0.119262939                                        | 6.428066015                         |
| 276.0906266                             | 0.398141333                              | 0.213635173                                        | 2.999246935                         |
| 75.18251534                             | 0.458517582                              | 0.265937277                                        | 1.458389006                         |
| 358.4848                                | 0.458373898                              | 0.259254067                                        | 1.85706496                          |
| 446.7708725                             | 0.425791389                              | 0.231167421                                        | 2.328701913                         |
| 218.1435473                             | 0.396121768                              | 0.224482414                                        | 2.213682981                         |
| 102.482679                              | 0.376821588                              | 0.211339806                                        | 2.63766941                          |
| 290.5272727                             | 0.429219671                              | 0.241734613                                        | 2.257138355                         |
| 302.966652                              | 0.26108585                               | 0.141802377                                        | 5.833432329                         |
| 140.1713147                             | 0.454058024                              | 0.256650247                                        | 1.929035028                         |
| 259.3353561                             | 0.358238446                              | 0.185999087                                        | 3.774288314                         |
| 113.3949329                             | 0.378621948                              | 0.207937527                                        | 2.545081412                         |
| 150.9449082                             | 0.443292208                              | 0.235852882                                        | 3.079537822                         |
| 125.480167                              | 0.262328164                              | 0.14957658                                         | 4.628004585                         |
| 150.3790275                             | 0.363331746                              | 0.201844708                                        | 2.432446568                         |
| 135.0119709                             | 0.479711438                              | 0.280128519                                        | 1.492158633                         |
| 102.7254902                             | 0.53616343                               | 0.30676994                                         | 1.518979323                         |
| 190.8232351                             | 0.327814014                              | 0.165835136                                        | 5.266854756                         |
| 327.9580912                             | 0.346531117                              | 0.175347342                                        | 4.953810376                         |
| 295.030589                              | 0.316885185                              | 0.183068598                                        | 3.550978474                         |
| 132.7392374                             | 0.44446817                               | 0.245921939                                        | 2.31724063                          |
| 516.5234987                             | 0.097712811                              | 0.078636605                                        | 12.69985139                         |
| 165.4477987                             | 0.422284549                              | 0.244926844                                        | 1.851825482                         |
| 265.9467542                             | 0.355533334                              | 0.186261898                                        | 3.876221044                         |
| 118.6898907                             | 0.400897285                              | 0.222029062                                        | 2.841147466                         |
| 270.8637037                             | 0.257817799                              | 0.144795732                                        | 5.302339034                         |
| 183.1411043                             | 0.233417272                              | 0.135486846                                        | 5.577430464                         |
| 141.743073                              | 0.481549017                              | 0.277035082                                        | 1.457975116                         |
| 339.6432568                             | 0.437815729                              | 0.243535715                                        | 2.248634494                         |
| 276.3551515                             | 0.374316185                              | 0.21497741                                         | 2.58019247                          |
| 282.0827206                             | 0.441233855                              | 0.243468921                                        | 2.128698224                         |
| 188.9351257                             | 0.481475424                              | 0.26040855                                         | 2.460458866                         |
| 352.5449059                             | 0.269567376                              | 0.159380348                                        | 3.799221699                         |
| 122.13085                               | 0.27533417                               | 0.150497761                                        | 4.85660125                          |
| 129.3021583                             | 0.215138879                              | 0.133001512                                        | 5.79558799                          |
| 397.4523727                             | 0.418735811                              | 0.22242644                                         | 3.042016641                         |



| wavelet.HHH_gldm_LargeDependenceEmphasis | wavelet.HHH_gldm_LargeDependenceLowGrayLevelEmphasis | wavelet.HHH_gldm_SmallDependenceHighGrayLevelEmphasis |
|------------------------------------------|------------------------------------------------------|-------------------------------------------------------|
| 5.826578699                              | 0.007426914                                          | 516.6752574                                           |
| 6.910160428                              | 0.022071754                                          | 192.7510931                                           |
| 9.165580183                              | 0.037142124                                          | 139.336064                                            |
| 15.45649949                              | 0.088976583                                          | 52.70654015                                           |
| 8.507601351                              | 0.009334259                                          | 447.7364716                                           |
| 4.533333333                              | 0.005234296                                          | 907.6847736                                           |
| 10.27694213                              | 0.030711244                                          | 159.2923676                                           |
| 17.03915427                              | 0.057342677                                          | 94.56310708                                           |
| 12.133304                                | 0.042184783                                          | 114.5915002                                           |
| 12.625                                   | 0.075759038                                          | 63.74337496                                           |
| 17.20026525                              | 0.023401261                                          | 237.5615115                                           |
| 9.69154013                               | 0.024645186                                          | 165.1687371                                           |
| 25.90198179                              | 0.086688477                                          | 75.84666403                                           |
| 11.76295865                              | 0.004900497                                          | 1120.973579                                           |
| 12.72177419                              | 0.039366771                                          | 124.2295891                                           |
| 11.86654479                              | 0.010437153                                          | 439.0256335                                           |
| 6.592964824                              | 0.015073865                                          | 238.1276227                                           |
| 19.26439578                              | 0.128455541                                          | 40.02185788                                           |
| 10.05238829                              | 0.021509642                                          | 196.5079872                                           |
| 12.32333141                              | 0.021452416                                          | 207.0895715                                           |
| 20.26984127                              | 0.068298044                                          | 89.68089449                                           |
| 10.21037998                              | 0.072806353                                          | 55.14783864                                           |
| 6.619140625                              | 0.026469072                                          | 203.4491512                                           |
| 10.01548923                              | 0.007514399                                          | 656.3612639                                           |
| 12.26787117                              | 0.08681302                                           | 57.15474009                                           |
| 9.597720557                              | 0.01103459                                           | 428.7712441                                           |
| 6.894215899                              | 0.010915659                                          | 348.2969875                                           |
| 16.00362056                              | 0.080080885                                          | 63.80063483                                           |
| 6.606263982                              | 0.038856884                                          | 100.3779115                                           |
| 7.451801363                              | 0.006331491                                          | 648.681574                                            |
| 18.62211013                              | 0.037613194                                          | 154.3091835                                           |
| 6.412276462                              | 0.005193244                                          | 744.0505245                                           |
| 8.775781976                              | 0.014473636                                          | 322.1632782                                           |
| 5.943829787                              | 0.012987616                                          | 285.4505705                                           |
| 8.528610354                              | 0.013870882                                          | 284.8302142                                           |
| 17.98632878                              | 0.048762624                                          | 106.027387                                            |
| 21.22574577                              | 0.070777492                                          | 79.89506735                                           |
| 12.98527417                              | 0.013495791                                          | 451.6009256                                           |
| 7.185365854                              | 0.0125771                                            | 284.9360585                                           |
| 9.779642366                              | 0.002749872                                          | 1549.466171                                           |
| 16.92367001                              | 0.064580971                                          | 83.06695071                                           |
| 11.4515128                               | 0.050891339                                          | 85.53311571                                           |
| 17.65316178                              | 0.066106384                                          | 74.80811288                                           |
| 5.359324759                              | 0.007246678                                          | 502.456826                                            |
| 7.128325509                              | 0.012964359                                          | 391.3787902                                           |
| 10.81129326                              | 0.0212765423                                         | 210.8706624                                           |
| 9.374835598                              | 0.003963826                                          | 1076.356844                                           |
| 12.49253731                              | 0.055523564                                          | 79.50266596                                           |
| 11.05170388                              | 0.050636566                                          | 92.886233                                             |
| 15.85946746                              | 0.068780812                                          | 69.28974513                                           |
| 8.458933437                              | 0.014388686                                          | 321.9935863                                           |
| 5.957579353                              | 0.009506062                                          | 371.0445062                                           |
| 12.77393617                              | 0.02606618                                           | 164.3948577                                           |
| 11.51992754                              | 0.014445366                                          | 305.4302786                                           |
| 12.04511278                              | 0.034553625                                          | 144.1818483                                           |
| 7.973333333                              | 0.011541998                                          | 319.4244004                                           |
| 9.087515451                              | 0.010061779                                          | 439.1634979                                           |
| 7.596298438                              | 0.009652584                                          | 396.7296917                                           |
| 10.10072816                              | 0.023662833                                          | 191.6717011                                           |
| 11.46752109                              | 0.021961991                                          | 234.5432441                                           |
| 6.26387316                               | 0.013981616                                          | 300.5390321                                           |
| 11.81722846                              | 0.036314369                                          | 122.1056132                                           |
| 9.991881154                              | 0.006338888                                          | 637.4031113                                           |
| 6.462941099                              | 0.004375905                                          | 747.1687094                                           |
| 25.36708861                              | 0.475628496                                          | 13.52491238                                           |
| 10.09839461                              | 0.01086103                                           | 415.3065956                                           |
| 6.31595092                               | 0.013176634                                          | 274.1243185                                           |
| 7.0336                                   | 0.001673695                                          | 2172.036375                                           |
| 8.46525525                               | 0.008552252                                          | 463.7442981                                           |
| 8.63216011                               | 0.014157177                                          | 266.6370723                                           |
| 9.752886836                              | 0.011487563                                          | 354.8984218                                           |
| 8.1002331                                | 0.006805096                                          | 557.106686                                            |
| 19.78016674                              | 0.112947523                                          | 52.73267544                                           |
| 7.20540062                               | 0.011694607                                          | 340.3824315                                           |
| 12.59885021                              | 0.011786621                                          | 418.8893663                                           |
| 9.733233979                              | 0.03999196                                           | 117.3506983                                           |
| 9.396494157                              | 0.007975                                             | 629.1371506                                           |
| 17.43215031                              | 0.118570158                                          | 45.52973115                                           |
| 9.900995899                              | 0.021151066                                          | 192.0966159                                           |
| 6.078238563                              | 0.009030668                                          | 378.8765814                                           |
| 5.638511815                              | 0.008026563                                          | 539.5428511                                           |
| 16.18732629                              | 0.044332468                                          | 133.0209147                                           |
| 14.94126644                              | 0.033974163                                          | 166.3704739                                           |
| 12.8145135                               | 0.040493702                                          | 114.4583318                                           |
| 8.02501025                               | 0.024667654                                          | 244.4885685                                           |
| 68.11096606                              | 2.330608314                                          | 3.394559152                                           |
| 7.473794549                              | 0.018191512                                          | 206.6638422                                           |
| 12.74106492                              | 0.029576339                                          | 170.800896                                            |
| 9.599726776                              | 0.01368478                                           | 317.5823572                                           |
| 18.79753086                              | 0.070516023                                          | 73.89568561                                           |
| 20.73006135                              | 0.069603466                                          | 73.7430554                                            |
| 6.052896725                              | 0.004637898                                          | 733.9842115                                           |
| 8.002894077                              | 0.017299283                                          | 237.5150982                                           |
| 9.613939394                              | 0.01457186                                           | 315.0362375                                           |
| 7.815257353                              | 0.008103183                                          | 490.2637131                                           |
| 7.846873174                              | 0.008797484                                          | 503.9916261                                           |
| 15.2513312                               | 0.057809568                                          | 76.93056465                                           |
| 17.31136581                              | 0.099995544                                          | 53.94207576                                           |
| 21.98800959                              | 0.208400075                                          | 26.99378001                                           |
| 9.789054382                              | 0.009416062                                          | 495.2503758                                           |

| wavelet.HHH_gldm_LargeDependenceHighGrayLevelEmphasis | wavelet.HHH_gldm_SmallDependenceLowGrayLevelEmphasis | wavelet.HHH_gldm_LowGrayLevelEmphasis | wavelet.HHH_gldm_DistanceZoneVariabilityNormalized |
|-------------------------------------------------------|------------------------------------------------------|---------------------------------------|----------------------------------------------------|
| 5560.594251                                           | 0.001443394                                          | 0.001996175                           | 0.998423957                                        |
| 2679.665241                                           | 0.004232458                                          | 0.005761138                           | 1                                                  |
| 2868.018253                                           | 0.005057835                                          | 0.007460852                           | 1                                                  |
| 2875.949846                                           | 0.003841813                                          | 0.008001868                           | 1                                                  |
| 8480.643581                                           | 0.000951464                                          | 0.001554188                           | 1                                                  |
| 6689.366667                                           | 0.002394099                                          | 0.002710701                           | 1                                                  |
| 4016.32419                                            | 0.003045309                                          | 0.004897567                           | 0.99074808                                         |
| 5248.86296                                            | 0.001502829                                          | 0.003913949                           | 0.997427657                                        |
| 3790.778707                                           | 0.002440049                                          | 0.004734882                           | 0.998885173                                        |
| 2336.753731                                           | 0.005173591                                          | 0.00915586                            | 1                                                  |
| 13182.09284                                           | 0.001106882                                          | 0.002036777                           | 1                                                  |
| 4101.894143                                           | 0.001658549                                          | 0.003248868                           | 0.997918837                                        |
| 7913.829138                                           | 0.001555684                                          | 0.004122982                           | 1                                                  |
| 32628.91089                                           | 0.000776692                                          | 0.000998693                           | 1                                                  |
| 4361.915323                                           | 0.001722298                                          | 0.00380868                            | 1                                                  |
| 14208.14465                                           | 0.000638716                                          | 0.00119427                            | 1                                                  |
| 3465.577052                                           | 0.002235086                                          | 0.003456918                           | 1                                                  |
| 3028.966748                                           | 0.002962459                                          | 0.008106653                           | 1                                                  |
| 5134.238829                                           | 0.001731419                                          | 0.00304782                            | 1                                                  |
| 7481.60627                                            | 0.001258199                                          | 0.002404818                           | 0.998921252                                        |
| 6228.755622                                           | 0.001463218                                          | 0.003976994                           | 0.997752812                                        |
| 1631.096386                                           | 0.0041568                                            | 0.00916834                            | 1                                                  |
| 2926.445313                                           | 0.003383366                                          | 0.006385907                           | 1                                                  |
| 14984.36381                                           | 0.000906878                                          | 0.001314025                           | 1                                                  |
| 1909.060487                                           | 0.004481833                                          | 0.009353319                           | 1                                                  |
| 9074.9561                                             | 0.001053329                                          | 0.001688706                           | 1                                                  |
| 4885.793999                                           | 0.001137895                                          | 0.001981867                           | 1                                                  |
| 3373.090152                                           | 0.002620414                                          | 0.006264833                           | 1                                                  |
| 1399.966443                                           | 0.005939609                                          | 0.008930575                           | 1                                                  |
| 9961.226874                                           | 0.00096375                                           | 0.001376608                           | 1                                                  |
| 9517.803489                                           | 0.001188787                                          | 0.002637004                           | 1                                                  |
| 9563.893668                                           | 0.000938457                                          | 0.001328545                           | 0.993007079                                        |
| 6247.620006                                           | 0.001469789                                          | 0.002458701                           | 0.997481112                                        |
| 3406.297021                                           | 0.001921535                                          | 0.003071527                           | 1                                                  |
| 5629.63624                                            | 0.001065166                                          | 0.002009198                           | 0.993349243                                        |
| 6824.866956                                           | 0.001245353                                          | 0.003237194                           | 0.997546016                                        |
| 6557.387261                                           | 0.00162246                                           | 0.004141765                           | 0.997905761                                        |
| 14666.1397                                            | 0.000570941                                          | 0.00144383                            | 0.988561751                                        |
| 4744.75935                                            | 0.001918168                                          | 0.002840357                           | 1                                                  |
| 36984.30729                                           | 0.000252876                                          | 0.000411853                           | 0.998798077                                        |
| 4664.980339                                           | 0.002371836                                          | 0.005094459                           | 1                                                  |
| 2772.146108                                           | 0.002014553                                          | 0.005070501                           | 0.997136727                                        |
| 4869.973173                                           | 0.001490293                                          | 0.004294929                           | 1                                                  |
| 5087.970659                                           | 0.001343174                                          | 0.001977373                           | 1                                                  |
| 5464.513302                                           | 0.002470616                                          | 0.003424272                           | 1                                                  |
| 6035.884153                                           | 0.001386556                                          | 0.002661465                           | 1                                                  |
| 23967.10916                                           | 0.000423217                                          | 0.000656057                           | 0.999037536                                        |
| 3042.566016                                           | 0.002983889                                          | 0.006094495                           | 1                                                  |
| 2660.247944                                           | 0.003569621                                          | 0.006440394                           | 1                                                  |
| 3841.795858                                           | 0.002370949                                          | 0.005592632                           | 1                                                  |
| 6150.073959                                           | 0.001825958                                          | 0.002828635                           | 1                                                  |
| 4236.818748                                           | 0.00123947                                           | 0.002025132                           | 0.998951233                                        |
| 6472.738918                                           | 0.000924995                                          | 0.00232067                            | 0.996131543                                        |
| 10092.98732                                           | 0.001501691                                          | 0.002265712                           | 0.995226758                                        |
| 4637.43609                                            | 0.002888705                                          | 0.004730399                           | 1                                                  |
| 6039.676923                                           | 0.001190181                                          | 0.002010503                           | 1                                                  |
| 9082.626452                                           | 0.001070944                                          | 0.001683185                           | 0.991865921                                        |
| 6714.157606                                           | 0.001024293                                          | 0.001738961                           | 1                                                  |
| 4696.292476                                           | 0.001752147                                          | 0.003212295                           | 1                                                  |
| 6341.442327                                           | 0.001114157                                          | 0.002288883                           | 0.997097249                                        |
| 3512.826727                                           | 0.002023941                                          | 0.003172468                           | 1                                                  |
| 4090.616479                                           | 0.001737654                                          | 0.003797673                           | 1                                                  |
| 16466.79979                                           | 0.00042621                                           | 0.000810678                           | 0.991301075                                        |
| 10213.87092                                           | 0.000478474                                          | 0.000827241                           | 0.98984798                                         |
| 1461.564557                                           | 0.007599345                                          | 0.024236828                           | 1                                                  |
| 10063.47204                                           | 0.000876894                                          | 0.001507669                           | 0.993103531                                        |
| 3665.755368                                           | 0.001944828                                          | 0.003045604                           | 1                                                  |
| 33143.38752                                           | 0.000264222                                          | 0.000380843                           | 0.990955869                                        |
| 9028.117978                                           | 0.000860164                                          | 0.00141503                            | 1                                                  |
| 5672.769151                                           | 0.001085332                                          | 0.002054089                           | 1                                                  |
| 9163.17398                                            | 0.001284069                                          | 0.001966319                           | 1                                                  |
| 10298.03147                                           | 0.000637847                                          | 0.001100385                           | 0.987805337                                        |
| 3626.476525                                           | 0.002669019                                          | 0.007032767                           | 1                                                  |
| 5220.280212                                           | 0.001868997                                          | 0.002677393                           | 0.996598649                                        |
| 14276.22868                                           | 0.000696891                                          | 0.001294404                           | 0.998408911                                        |
| 2672.161699                                           | 0.002851267                                          | 0.005500312                           | 1                                                  |
| 12585.62312                                           | 0.001041294                                          | 0.00148582                            | 1                                                  |
| 2756.046973                                           | 0.005417478                                          | 0.010404441                           | 1                                                  |
| 5041.061511                                           | 0.001520567                                          | 0.002885084                           | 1                                                  |
| 4749.494228                                           | 0.001235791                                          | 0.002001062                           | 1                                                  |
| 5382.709904                                           | 0.002247752                                          | 0.002784085                           | 1                                                  |
| 6187.211784                                           | 0.001689686                                          | 0.00355586                            | 1                                                  |
| 6941.663506                                           | 0.001699057                                          | 0.003183073                           | 0.998405105                                        |
| 4412.998048                                           | 0.001803301                                          | 0.004079125                           | 1                                                  |
| 4420.136941                                           | 0.003193414                                          | 0.005515996                           | 0.993615389                                        |
| 2078.572454                                           | 0.005299034                                          | 0.038008571                           | 1                                                  |
| 3537.380294                                           | 0.00197904                                           | 0.003371748                           | 1                                                  |
| 5950.141138                                           | 0.002164381                                          | 0.003640341                           | 1                                                  |
| 7336.357923                                           | 0.001348601                                          | 0.002167517                           | 1                                                  |
| 5171.363457                                           | 0.001699124                                          | 0.004526313                           | 1                                                  |
| 6384.548313                                           | 0.001929465                                          | 0.004496518                           | 1                                                  |
| 9163.352225                                           | 0.000814048                                          | 0.001176571                           | 0.995461446                                        |
| 4127.178468                                           | 0.001669941                                          | 0.002868693                           | 0.988536873                                        |
| 7856.97697                                            | 0.000683776                                          | 0.001939185                           | 1                                                  |
| 8241.769301                                           | 0.000855963                                          | 0.001416289                           | 0.997289978                                        |
| 7855.336061                                           | 0.001050276                                          | 0.001614299                           | 0.997841341                                        |
| 4201.55733                                            | 0.001695245                                          | 0.004503629                           | 1                                                  |
| 3209.595033                                           | 0.003386241                                          | 0.007769335                           | 1                                                  |
| 2459.306954                                           | 0.004778222                                          | 0.012528067                           | 1                                                  |
| 11100.11171                                           | 0.000914598                                          | 0.001454583                           | 0.997112962                                        |

| wavelet.HHH_gldzm_LowIntensityEmphasis | wavelet.HHH_gldzm_LargeDistanceEmphasis | wavelet.HHH_gldzm_HighIntensitySmallDistanceEmphasis | wavelet.HHH_gldzm_LowIntensityLargeDistanceEmphasis |
|----------------------------------------|-----------------------------------------|------------------------------------------------------|-----------------------------------------------------|
| 0.002570911                            | 1.002365931                             | 994.3266956                                          | 0.002579098                                         |
| 0.008515462                            | 1                                       | 421.7175258                                          | 0.008515462                                         |
| 0.011455311                            | 1                                       | 342.5950069                                          | 0.011455311                                         |
| 0.013480782                            | 1                                       | 194.2430556                                          | 0.013480782                                         |
| 0.002075382                            | 1                                       | 1030.698276                                          | 0.002075382                                         |
| 0.003848097                            | 1                                       | 1589.014286                                          | 0.003848097                                         |
| 0.007156226                            | 1.01394268                              | 401.921282                                           | 0.007206938                                         |
| 0.005116515                            | 1.00386349                              | 325.1225048                                          | 0.005131722                                         |
| 0.00666115                             | 1.001673173                             | 327.617401                                           | 0.006665333                                         |
| 0.015115093                            | 1                                       | 197.7382199                                          | 0.015115093                                         |
| 0.003436944                            | 1                                       | 788.1676529                                          | 0.003436944                                         |
| 0.004290867                            | 1.003125                                | 446.0273438                                          | 0.004304756                                         |
| 0.006654517                            | 1                                       | 323.8364055                                          | 0.006654517                                         |
| 0.001836901                            | 1                                       | 2850.571042                                          | 0.001836901                                         |
| 0.005053828                            | 1                                       | 367.9693593                                          | 0.005053828                                         |
| 0.001670095                            | 1                                       | 1216.787353                                          | 0.001670095                                         |
| 0.004703202                            | 1                                       | 544.4159869                                          | 0.004703202                                         |
| 0.012908627                            | 1                                       | 174.8006993                                          | 0.012908627                                         |
| 0.004421201                            | 1                                       | 532.077634                                           | 0.004421201                                         |
| 0.003664568                            | 1.001618996                             | 624.8094981                                          | 0.003668615                                         |
| 0.00528408                             | 1.003374578                             | 327.8450506                                          | 0.005304048                                         |
| 0.012456873                            | 1                                       | 170.7356608                                          | 0.012456873                                         |
| 0.007868956                            | 1                                       | 454.6921642                                          | 0.007868956                                         |
| 0.001942256                            | 1                                       | 1533.72546                                           | 0.001942256                                         |
| 0.013652535                            | 1                                       | 178.4601367                                          | 0.013652535                                         |
| 0.002263438                            | 1                                       | 970.4473684                                          | 0.002263438                                         |
| 0.002375547                            | 1                                       | 757.9625073                                          | 0.002375547                                         |
| 0.009360738                            | 1                                       | 231.2307692                                          | 0.009360738                                         |
| 0.012155792                            | 1                                       | 224.8290598                                          | 0.012155792                                         |
| 0.00188242                             | 1                                       | 1375.814016                                          | 0.00188242                                          |
| 0.004094726                            | 1                                       | 538.0127479                                          | 0.004094726                                         |
| 0.001811541                            | 1.010526316                             | 1547.84693                                           | 0.001811715                                         |
| 0.003277729                            | 1.003783102                             | 754.1793821                                          | 0.003285594                                         |
| 0.003796864                            | 1                                       | 594.8729198                                          | 0.003796864                                         |
| 0.002453838                            | 1.010009533                             | 677.7663251                                          | 0.00249294                                          |
| 0.004655275                            | 1.003685504                             | 401.953317                                           | 0.004669672                                         |
| 0.0064385                              | 1.003144654                             | 323.5283019                                          | 0.006446362                                         |
| 0.001656807                            | 1.017256637                             | 1176.195465                                          | 0.001680764                                         |
| 0.004190826                            | 1                                       | 679.6767677                                          | 0.004190826                                         |
| 0.000583666                            | 1.001803969                             | 3821.556524                                          | 0.000584174                                         |
| 0.008100507                            | 1                                       | 289.7225064                                          | 0.008100507                                         |
| 0.006096996                            | 1.004301075                             | 261.8369176                                          | 0.00611821                                          |
| 0.005574353                            | 1                                       | 282.5766208                                          | 0.005574353                                         |
| 0.002465516                            | 1                                       | 979.6506106                                          | 0.002465516                                         |
| 0.004893198                            | 1                                       | 837.9032258                                          | 0.004893198                                         |
| 0.003689448                            | 1                                       | 591.108229                                           | 0.003689448                                         |
| 0.000967646                            | 1.001444391                             | 2609.452215                                          | 0.00096801                                          |
| 0.009462558                            | 1                                       | 262.283737                                           | 0.009462558                                         |
| 0.009391074                            | 1                                       | 258.1565217                                          | 0.009391074                                         |
| 0.008560744                            | 1                                       | 257.3248082                                          | 0.008560744                                         |
| 0.004029933                            | 1                                       | 756.1556265                                          | 0.004029933                                         |
| 0.002390105                            | 1.001573977                             | 742.2425236                                          | 0.002393674                                         |
| 0.002878354                            | 1.005813953                             | 522.7114018                                          | 0.00289072                                          |
| 0.004076417                            | 1.007177033                             | 885.0645933                                          | 0.004087034                                         |
| 0.007875095                            | 1                                       | 424.8454012                                          | 0.007875095                                         |
| 0.002680801                            | 1                                       | 770.3127001                                          | 0.002680801                                         |
| 0.00235516                             | 1.012251149                             | 1030.914625                                          | 0.002370788                                         |
| 0.002248451                            | 1                                       | 919.8566434                                          | 0.002248451                                         |
| 0.004364483                            | 1                                       | 494.7854137                                          | 0.004364483                                         |
| 0.002717361                            | 1.004360465                             | 587.3705184                                          | 0.00272791                                          |
| 0.003933702                            | 1                                       | 608.8738739                                          | 0.003933702                                         |
| 0.005023508                            | 1                                       | 365.4252525                                          | 0.005023508                                         |
| 0.00106062                             | 1.013105639                             | 1674.96803                                           | 0.001072487                                         |
| 0.000974795                            | 1.015306122                             | 1589.850765                                          | 0.000986399                                         |
| 0.039270521                            | 1                                       | 66.8666667                                           | 0.039270521                                         |
| 0.002079146                            | 1.010380623                             | 1040.171569                                          | 0.002094831                                         |
| 0.00400101                             | 1                                       | 595.3498542                                          | 0.00400101                                          |
| 0.000528751                            | 1.013628104                             | 4725.517717                                          | 0.000531886                                         |
| 0.00191418                             | 1                                       | 1086.982777                                          | 0.00191418                                          |
| 0.002599788                            | 1                                       | 676.0942249                                          | 0.002599788                                         |
| 0.003119837                            | 1                                       | 946.1964286                                          | 0.003119837                                         |
| 0.001399175                            | 1.018404908                             | 1292.701274                                          | 0.001413036                                         |
| 0.01020527                             | 1                                       | 203.6860841                                          | 0.01020527                                          |
| 0.003787657                            | 1.005110733                             | 749.2438245                                          | 0.003793155                                         |
| 0.001850371                            | 1.002388535                             | 1169.861465                                          | 0.001853025                                         |
| 0.007186031                            | 1                                       | 305.3501684                                          | 0.007186031                                         |
| 0.002171302                            | 1                                       | 1417.082022                                          | 0.002171302                                         |
| 0.020098549                            | 1                                       | 175.2840909                                          | 0.020098549                                         |
| 0.004013998                            | 1                                       | 528.705036                                           | 0.004013998                                         |
| 0.002443902                            | 1                                       | 788.1650038                                          | 0.002443902                                         |
| 0.003806815                            | 1                                       | 1003.530662                                          | 0.003806815                                         |
| 0.004984813                            | 1                                       | 406.9397218                                          | 0.004984813                                         |
| 0.004686054                            | 1.002394254                             | 482.6456504                                          | 0.004695407                                         |
| 0.005618749                            | 1                                       | 363.66171                                            | 0.005618749                                         |
| 0.007227584                            | 1.009607686                             | 547.9621697                                          | 0.007277285                                         |
| 0.06134279                             | 1                                       | 34.87234043                                          | 0.06134279                                          |
| 0.004440203                            | 1                                       | 491.33391                                            | 0.004440203                                         |
| 0.00581336                             | 1                                       | 483.261524                                           | 0.00581336                                          |
| 0.003135357                            | 1                                       | 793.5924812                                          | 0.003135357                                         |
| 0.006535191                            | 1                                       | 287.0330275                                          | 0.006535191                                         |
| 0.008166622                            | 1                                       | 318.8019169                                          | 0.008166622                                         |
| 0.001566267                            | 1.006823351                             | 1520.377938                                          | 0.001571123                                         |
| 0.003622515                            | 1.017294389                             | 537.8686587                                          | 0.003664418                                         |
| 0.002118708                            | 1                                       | 839.6765537                                          | 0.002118708                                         |
| 0.001823026                            | 1.004070556                             | 1106.9481                                            | 0.001831265                                         |
| 0.00207052                             | 1.003241491                             | 1047.244462                                          | 0.002074436                                         |
| 0.006241997                            | 1                                       | 287.488665                                           | 0.006241997                                         |
| 0.012145556                            | 1                                       | 195.9419355                                          | 0.012145556                                         |
| 0.022315635                            | 1                                       | 126.0497238                                          | 0.022315635                                         |
| 0.00203249                             | 1.004336827                             | 1179.872064                                          | 0.002035828                                         |

| wavelet.HHH_gldzm_HighIntensityEmphasis | wavelet.HHH_gldzm_DistanceZoneVariability | wavelet.HHH_gldzm_ZonePercentage | wavelet.HHH_gldzm_IntensityVariabilityNormalized |
|-----------------------------------------|-------------------------------------------|----------------------------------|--------------------------------------------------|
| 994.4976341                             | 1266.001577                               | 0.597549482                      | 0.040429798                                      |
| 421.7175258                             | 485                                       | 0.518716578                      | 0.052320119                                      |
| 342.5950069                             | 721                                       | 0.470013038                      | 0.052302531                                      |
| 194.2430556                             | 288                                       | 0.294779939                      | 0.072868441                                      |
| 1030.698276                             | 1160                                      | 0.489864865                      | 0.048039536                                      |
| 1589.014286                             | 420                                       | 0.636363636                      | 0.036111111                                      |
| 404.0402789                             | 2558.111541                               | 0.456910281                      | 0.051968853                                      |
| 325.3915003                             | 1549.005151                               | 0.30403289                       | 0.069329288                                      |
| 327.7847183                             | 1791.001115                               | 0.39441267                       | 0.057879857                                      |
| 197.7382199                             | 382                                       | 0.356343284                      | 0.068035416                                      |
| 788.1676529                             | 507                                       | 0.336206897                      | 0.065329957                                      |
| 446.203125                              | 958.0020833                               | 0.4164859                        | 0.058548177                                      |
| 323.8364055                             | 434                                       | 0.23245849                       | 0.077374758                                      |
| 2850.571042                             | 739                                       | 0.430401864                      | 0.046863241                                      |
| 367.9693593                             | 718                                       | 0.361895161                      | 0.063492679                                      |
| 1216.787353                             | 1787                                      | 0.408363803                      | 0.052273007                                      |
| 544.4159869                             | 613                                       | 0.513400335                      | 0.049373418                                      |
| 174.8006993                             | 286                                       | 0.231954582                      | 0.092914079                                      |
| 532.077634                              | 541                                       | 0.416795069                      | 0.053932438                                      |
| 624.9713977                             | 1851.001079                               | 0.356414695                      | 0.059545219                                      |
| 327.9876265                             | 887.0022497                               | 0.293981481                      | 0.06782434                                       |
| 170.7356608                             | 401                                       | 0.371640408                      | 0.073774417                                      |
| 454.6921642                             | 536                                       | 0.5234375                        | 0.046815828                                      |
| 1533.72546                              | 1304                                      | 0.49263317                       | 0.043568162                                      |
| 178.4601367                             | 439                                       | 0.344854674                      | 0.075731238                                      |
| 970.4473684                             | 1178                                      | 0.497256226                      | 0.045132754                                      |
| 757.9625073                             | 1707                                      | 0.527992577                      | 0.044885991                                      |
| 231.2307692                             | 793                                       | 0.287110789                      | 0.075107061                                      |
| 224.8290598                             | 234                                       | 0.523489933                      | 0.060632625                                      |
| 1375.814016                             | 1113                                      | 0.541869523                      | 0.045058441                                      |
| 538.0127479                             | 1412                                      | 0.296763346                      | 0.060856359                                      |
| 1552.985088                             | 1132.02807                                | 0.550990817                      | 0.034998461                                      |
| 754.6380832                             | 1582.005044                               | 0.491173738                      | 0.041550515                                      |
| 594.8729198                             | 1322                                      | 0.562553191                      | 0.043578816                                      |
| 678.6911344                             | 2084.046711                               | 0.476385104                      | 0.048788578                                      |
| 402.1891892                             | 812.002457                                | 0.271423808                      | 0.068059572                                      |
| 323.8427673                             | 952.0020964                               | 0.256382693                      | 0.073764223                                      |
| 1180.936726                             | 2234.149558                               | 0.437899632                      | 0.043157647                                      |
| 679.6767677                             | 594                                       | 0.482926829                      | 0.052625016                                      |
| 3823.187312                             | 3322.002405                               | 0.457496561                      | 0.047403084                                      |
| 289.7225064                             | 782                                       | 0.301464919                      | 0.066865732                                      |
| 262.2379928                             | 1391.005735                               | 0.360744763                      | 0.067895839                                      |
| 282.5766208                             | 1018                                      | 0.278675062                      | 0.080631154                                      |
| 979.6506106                             | 1474                                      | 0.59244373                       | 0.036737185                                      |
| 837.9032258                             | 682                                       | 0.533646322                      | 0.036480594                                      |
| 591.108229                              | 1118                                      | 0.407285974                      | 0.054956941                                      |
| 2610.885412                             | 2075.000963                               | 0.455282771                      | 0.042669455                                      |
| 262.283737                              | 289                                       | 0.331802526                      | 0.067444116                                      |
| 258.1565217                             | 345                                       | 0.405405405                      | 0.067002731                                      |
| 257.3248082                             | 391                                       | 0.289201183                      | 0.074796737                                      |
| 756.1556265                             | 1253                                      | 0.48773842                       | 0.041777468                                      |
| 742.4160546                             | 1904.001049                               | 0.565410857                      | 0.044450121                                      |
| 523.5161499                             | 1542.011628                               | 0.343085106                      | 0.071071951                                      |
| 886.277512                              | 416.0047847                               | 0.378623188                      | 0.066253062                                      |
| 424.8454012                             | 511                                       | 0.384210526                      | 0.053955829                                      |
| 770.3127001                             | 937                                       | 0.480512821                      | 0.051173789                                      |
| 1034.324655                             | 1943.065339                               | 0.484301607                      | 0.046803004                                      |
| 919.8566434                             | 1716                                      | 0.496240602                      | 0.04484191                                       |
| 494.7854137                             | 713                                       | 0.432645631                      | 0.05556397                                       |
| 588.0104167                             | 4116.017442                               | 0.452185343                      | 0.048822139                                      |
| 608.8738739                             | 999                                       | 0.565685164                      | 0.042698354                                      |
| 365.4252525                             | 990                                       | 0.370786517                      | 0.059887767                                      |
| 1679.370929                             | 2496.096108                               | 0.434962861                      | 0.05436473                                       |
| 1595.448251                             | 4074.214286                               | 0.539944904                      | 0.045538353                                      |
| 66.8666667                              | 165                                       | 0.208860759                      | 0.109421488                                      |
| 1042.956171                             | 1722.041522                               | 0.448990161                      | 0.044876272                                      |
| 595.3498542                             | 686                                       | 0.52607362                       | 0.044598764                                      |
| 4741.256814                             | 3272.136281                               | 0.52832                          | 0.042306647                                      |
| 1086.982777                             | 2787                                      | 0.475840874                      | 0.051501223                                      |
| 676.0942249                             | 1316                                      | 0.45410628                       | 0.054897174                                      |
| 946.1964286                             | 560                                       | 0.431100847                      | 0.051071429                                      |
| 1299.294479                             | 2093.159509                               | 0.493939394                      | 0.048065314                                      |
| 203.6860841                             | 618                                       | 0.271171566                      | 0.081529309                                      |
| 750.4327087                             | 1170.006814                               | 0.519698982                      | 0.046562517                                      |
| 1170.398885                             | 1254.001592                               | 0.401149792                      | 0.046761532                                      |
| 305.3501684                             | 594                                       | 0.442622951                      | 0.056060039                                      |
| 1417.082022                             | 1207                                      | 0.50375626                       | 0.037951085                                      |
| 175.2840909                             | 264                                       | 0.275574113                      | 0.071453168                                      |
| 528.705036                              | 695                                       | 0.407147042                      | 0.056098546                                      |
| 788.1650038                             | 1303                                      | 0.557075673                      | 0.046155368                                      |
| 1003.530662                             | 1223                                      | 0.61488185                       | 0.039732465                                      |
| 406.9397218                             | 647                                       | 0.359644247                      | 0.062743515                                      |
| 482.7988827                             | 1251.001596                               | 0.383297645                      | 0.058535333                                      |
| 363.66171                               | 1076                                      | 0.350146437                      | 0.061246735                                      |
| 548.5620496                             | 1241.02562                                | 0.512095121                      | 0.038373693                                      |
| 34.87234043                             | 141                                       | 0.092036554                      | 0.222071324                                      |
| 491.33391                               | 1156                                      | 0.484696017                      | 0.051370314                                      |
| 483.261524                              | 1063                                      | 0.387673231                      | 0.060202537                                      |
| 793.5924812                             | 665                                       | 0.454234973                      | 0.053296399                                      |
| 287.0330275                             | 545                                       | 0.269135802                      | 0.079107819                                      |
| 318.8019169                             | 313                                       | 0.240030675                      | 0.076565036                                      |
| 1523.115239                             | 1313.013647                               | 0.553736356                      | 0.045455094                                      |
| 540.3420446                             | 2572.172944                               | 0.502025854                      | 0.048412473                                      |
| 839.6765537                             | 1416                                      | 0.429090909                      | 0.057134564                                      |
| 1107.667571                             | 2205.008141                               | 0.508042279                      | 0.044157937                                      |
| 1047.994057                             | 1847.004322                               | 0.540911748                      | 0.038141078                                      |
| 287.488665                              | 794                                       | 0.281860135                      | 0.07343172                                       |
| 195.9419355                             | 310                                       | 0.29608405                       | 0.070301769                                      |
| 126.0497238                             | 181                                       | 0.217026379                      | 0.09703611                                       |
| 1181.582942                             | 2759.011565                               | 0.47921718                       | 0.044273015                                      |

| wavelet.HHH_gldzm_LowIntensitySmallDistanceEmphasis | wavelet.HHH_gldzm_IntensityVariability | wavelet.HHH_gldzm_HighIntensityLargeDistanceEmphasis | wavelet.HHH_gldzm_SmallDistanceEmphasis |
|-----------------------------------------------------|----------------------------------------|------------------------------------------------------|-----------------------------------------|
| 0.002568865                                         | 51.26498423                            | 995.181388                                           | 0.999408517                             |
| 0.008515462                                         | 25.37525773                            | 421.7175258                                          | 1                                       |
| 0.011455311                                         | 37.71012483                            | 342.5950069                                          | 1                                       |
| 0.013480782                                         | 20.98611111                            | 194.2430556                                          | 1                                       |
| 0.002075382                                         | 55.72586207                            | 1030.698276                                          | 1                                       |
| 0.003848097                                         | 15.16666667                            | 1589.014286                                          | 1                                       |
| 0.007143548                                         | 134.1835786                            | 412.5162665                                          | 0.99651433                              |
| 0.005112713                                         | 107.6683838                            | 326.4674823                                          | 0.999034127                             |
| 0.006660104                                         | 103.7785834                            | 328.4539877                                          | 0.999581707                             |
| 0.015115093                                         | 25.9895288                             | 197.7382199                                          | 1                                       |
| 0.003436944                                         | 33.12228797                            | 788.1676529                                          | 1                                       |
| 0.004287395                                         | 56.20625                               | 446.90625                                            | 0.99921875                              |
| 0.006654517                                         | 33.58064516                            | 323.8364055                                          | 1                                       |
| 0.001836901                                         | 34.63193505                            | 2850.571042                                          | 1                                       |
| 0.005053828                                         | 45.58774373                            | 367.9693593                                          | 1                                       |
| 0.001670095                                         | 93.41186346                            | 1216.787353                                          | 1                                       |
| 0.004703202                                         | 30.26590538                            | 544.4159869                                          | 1                                       |
| 0.012908627                                         | 26.57342657                            | 174.8006993                                          | 1                                       |
| 0.004421201                                         | 29.17744917                            | 532.077634                                           | 1                                       |
| 0.003663556                                         | 110.3372909                            | 625.6189962                                          | 0.999595251                             |
| 0.005279088                                         | 60.29583802                            | 328.5579303                                          | 0.999156355                             |
| 0.012456873                                         | 29.58354115                            | 170.7356608                                          | 1                                       |
| 0.007868956                                         | 25.09328358                            | 454.6921642                                          | 1                                       |
| 0.001942256                                         | 56.81288344                            | 1533.72546                                           | 1                                       |
| 0.013652535                                         | 33.24601367                            | 178.4601367                                          | 1                                       |
| 0.002263438                                         | 53.1663837                             | 970.4473684                                          | 1                                       |
| 0.002375547                                         | 76.62038664                            | 757.9625073                                          | 1                                       |
| 0.009360738                                         | 59.55989912                            | 231.2307692                                          | 1                                       |
| 0.012155792                                         | 14.18803419                            | 224.8290598                                          | 1                                       |
| 0.00188242                                          | 50.15004492                            | 1375.814016                                          | 1                                       |
| 0.004094726                                         | 85.92917847                            | 538.0127479                                          | 1                                       |
| 0.001810147                                         | 39.89824561                            | 1573.537719                                          | 0.997368421                             |
| 0.003275763                                         | 65.89911728                            | 756.4728878                                          | 0.999054224                             |
| 0.003796864                                         | 57.61119516                            | 594.8729198                                          | 1                                       |
| 0.002444063                                         | 102.3584366                            | 682.3903718                                          | 0.997497617                             |
| 0.004651676                                         | 55.4004914                             | 403.1326781                                          | 0.999078624                             |
| 0.006436535                                         | 70.37106918                            | 325.1006289                                          | 0.999213836                             |
| 0.001650818                                         | 97.53628319                            | 1199.90177                                           | 0.995685841                             |
| 0.004190826                                         | 31.25925926                            | 679.6767677                                          | 1                                       |
| 0.000583539                                         | 157.6626578                            | 3829.710463                                          | 0.999549008                             |
| 0.008100507                                         | 52.28900256                            | 289.7225064                                          | 1                                       |
| 0.006091693                                         | 94.71469534                            | 263.8422939                                          | 0.998924731                             |
| 0.005574353                                         | 82.08251473                            | 282.5766208                                          | 1                                       |
| 0.002465516                                         | 54.15061058                            | 979.6506106                                          | 1                                       |
| 0.004893198                                         | 24.8797654                             | 837.9032258                                          | 1                                       |
| 0.003689448                                         | 61.44186047                            | 591.108229                                           | 1                                       |
| 0.000967555                                         | 88.62445835                            | 2616.618199                                          | 0.999638902                             |
| 0.009462558                                         | 19.49134948                            | 262.283737                                           | 1                                       |
| 0.009391074                                         | 23.11594203                            | 258.1565217                                          | 1                                       |
| 0.008560744                                         | 29.2455243                             | 257.3248082                                          | 1                                       |
| 0.004029933                                         | 52.3471668                             | 756.1556265                                          | 1                                       |
| 0.002389213                                         | 84.72193075                            | 743.1101784                                          | 0.999606506                             |
| 0.002875262                                         | 110.0193798                            | 526.7351421                                          | 0.998546512                             |
| 0.004073763                                         | 27.6937799                             | 891.1291866                                          | 0.998205742                             |
| 0.007875095                                         | 27.57142857                            | 424.8454012                                          | 1                                       |
| 0.002680801                                         | 47.94983991                            | 770.3127001                                          | 1                                       |
| 0.002351253                                         | 91.68708525                            | 1047.964778                                          | 0.996937213                             |
| 0.002248451                                         | 76.94871795                            | 919.8566434                                          | 1                                       |
| 0.004364483                                         | 39.6171108                             | 494.7854137                                          | 1                                       |
| 0.002714724                                         | 201.5377907                            | 590.5700097                                          | 0.998909884                             |
| 0.003933702                                         | 42.65565566                            | 608.8738739                                          | 1                                       |
| 0.005023508                                         | 59.28888889                            | 365.4252525                                          | 1                                       |
| 0.001057654                                         | 136.8903892                            | 1696.982526                                          | 0.99672359                              |
| 0.000971895                                         | 187.4358601                            | 1617.838192                                          | 0.996173469                             |
| 0.039270521                                         | 18.05454545                            | 66.86666667                                          | 1                                       |
| 0.002075225                                         | 77.81545559                            | 1054.094579                                          | 0.997404844                             |
| 0.00400101                                          | 30.59475219                            | 595.3498542                                          | 1                                       |
| 0.000527967                                         | 139.6965475                            | 4804.213204                                          | 0.996592974                             |
| 0.00191418                                          | 143.5339074                            | 1086.982777                                          | 1                                       |
| 0.002599788                                         | 72.24468085                            | 676.0942249                                          | 1                                       |
| 0.003119837                                         | 28.6                                   | 946.1964286                                          | 1                                       |
| 0.001395709                                         | 101.8504011                            | 1325.667296                                          | 0.995398773                             |
| 0.01020527                                          | 50.38511327                            | 203.6860841                                          | 1                                       |
| 0.003786282                                         | 54.66439523                            | 755.1882453                                          | 0.998722317                             |
| 0.001849707                                         | 58.73248408                            | 1172.548567                                          | 0.999402866                             |
| 0.007186031                                         | 33.2996633                             | 305.3501684                                          | 1                                       |
| 0.002171302                                         | 45.8069594                             | 1417.082022                                          | 1                                       |
| 0.020098549                                         | 18.86363636                            | 175.2840909                                          | 1                                       |
| 0.004013998                                         | 38.98848921                            | 528.705036                                           | 1                                       |
| 0.002443902                                         | 60.14044513                            | 788.1650038                                          | 1                                       |
| 0.003806815                                         | 48.59280458                            | 1003.530662                                          | 1                                       |
| 0.004984813                                         | 40.5950541                             | 406.9397218                                          | 1                                       |
| 0.004683716                                         | 73.34477255                            | 483.4118117                                          | 0.999401437                             |
| 0.005618749                                         | 65.90148699                            | 363.66171                                            | 1                                       |
| 0.007215158                                         | 47.92874299                            | 550.9615693                                          | 0.997598078                             |
| 0.06134279                                          | 31.31205674                            | 34.87234043                                          | 1                                       |
| 0.004440203                                         | 59.38408304                            | 491.33391                                            | 1                                       |
| 0.00581336                                          | 63.99529633                            | 483.261524                                           | 1                                       |
| 0.003135357                                         | 35.44210526                            | 793.5924812                                          | 1                                       |
| 0.006535191                                         | 43.11376147                            | 287.0330275                                          | 1                                       |
| 0.008166622                                         | 23.96485623                            | 318.8019169                                          | 1                                       |
| 0.001565054                                         | 59.95526914                            | 1534.064443                                          | 0.998294162                             |
| 0.00361204                                          | 125.9692544                            | 550.235588                                           | 0.995676403                             |
| 0.002118708                                         | 80.90254237                            | 839.6765537                                          | 1                                       |
| 0.001820966                                         | 97.63319765                            | 1110.545455                                          | 0.998982361                             |
| 0.002069541                                         | 70.5991356                             | 1050.992437                                          | 0.999189627                             |
| 0.006241997                                         | 58.30478589                            | 287.488665                                           | 1                                       |
| 0.012145556                                         | 21.79354839                            | 195.9419355                                          | 1                                       |
| 0.022315635                                         | 17.56353591                            | 126.0497238                                          | 1                                       |
| 0.002031655                                         | 122.5034333                            | 1188.426455                                          | 0.998915793                             |













| wavelet.HHH_firstorder_Energy | wavelet.HHH_firstorder_RobustMeanAbsoluteDeviation | wavelet.HHH_firstorder_Median | wavelet.HHH_firstorder_TotalEnergy | wavelet.HHH_firstorder_Maximum |
|-------------------------------|----------------------------------------------------|-------------------------------|------------------------------------|--------------------------------|
| 51981204.72                   | 71.78704644                                        | 4.193005631                   | 1403492527                         | 587.8018297                    |
| 12794700.46                   | 53.18353677                                        | 0.516764464                   | 345456912.4                        | 516.7712539                    |
| 19106906.49                   | 50.4136921                                         | 1.779930546                   | 515886475.1                        | 441.0057102                    |
| 4629359.308                   | 30.37276586                                        | 1.127702103                   | 124992701.3                        | 218.6637885                    |
| 38754061.83                   | 51.79284881                                        | -0.280212595                  | 1046359669                         | 594.9031698                    |
| 25678169.88                   | 79.05168926                                        | -2.32582379                   | 693310586.6                        | 830.6698914                    |
| 67719307.58                   | 50.02671081                                        | 1.380508321                   | 1828421305                         | 434.6045418                    |
| 27307920.72                   | 30.41704491                                        | -0.205925213                  | 737313859.4                        | 351.7210412                    |
| 39745975.92                   | 41.47116784                                        | 1.095498971                   | 1073141350                         | 466.372959                     |
| 6248111.235                   | 36.03890112                                        | -1.593920312                  | 168699003.4                        | 282.3646131                    |
| 9825000.34                    | 32.64016786                                        | 4.160060424                   | 265275009.2                        | 414.277263                     |
| 20408409.02                   | 42.74238875                                        | -0.284042711                  | 551027043.6                        | 538.360928                     |
| 7260227.683                   | 22.69531291                                        | -1.409769187                  | 196026147.4                        | 289.2162556                    |
| 44042393.64                   | 44.22020147                                        | -0.690041468                  | 1189144628                         | 1162.981116                    |
| 13433799.84                   | 37.99038604                                        | -1.343934728                  | 362712595.6                        | 368.4643258                    |
| 57098877.05                   | 45.5754547                                         | -0.701231471                  | 1541669680                         | 616.3632307                    |
| 18357666.98                   | 59.39847559                                        | 4.56908392                    | 495657008.5                        | 443.6042549                    |
| 3842363.462                   | 25.55152947                                        | -0.384602039                  | 103743813.5                        | 264.0844775                    |
| 13516699.45                   | 44.49717926                                        | 0.78908252                    | 364950885.2                        | 436.1641095                    |
| 40847579.29                   | 38.36056952                                        | 0.882032975                   | 1102884641                         | 451.6502134                    |
| 15817910                      | 30.70116298                                        | -1.031548865                  | 427083570.1                        | 355.0565664                    |
| 5907570.488                   | 38.25382586                                        | -0.98579619                   | 159504403.2                        | 254.2305134                    |
| 17494077.04                   | 62.40902909                                        | 0.565548991                   | 472340080.1                        | 479.917239                     |
| 66290235.19                   | 55.14592389                                        | 0.403918721                   | 1789836350                         | 830.8438196                    |
| 5774989.128                   | 32.97954926                                        | 0.908208965                   | 155924706.5                        | 252.7071064                    |
| 44119359.78                   | 51.79577894                                        | 0.846008437                   | 1191222714                         | 626.8834441                    |
| 56452516.56                   | 63.45477502                                        | 4.01177633                    | 1524217947                         | 534.7369843                    |
| 11950037.47                   | 29.96342247                                        | -0.811111955                  | 322651011.8                        | 351.6759545                    |
| 4192150.908                   | 49.93589973                                        | -2.946427449                  | 113188074.5                        | 283.2650122                    |
| 43600035.29                   | 59.5829428                                         | -3.265121609                  | 1177200953                         | 733.4333069                    |
| 33410403.82                   | 30.4205776                                         | 0.940437703                   | 902080903                          | 598.1164543                    |
| 71761595.17                   | 77.79903384                                        | -2.960692008                  | 1937563070                         | 628.2366515                    |
| 76889965.23                   | 60.1573844                                         | 1.463193336                   | 2076029061                         | 779.3483341                    |
| 50083829.59                   | 69.78048314                                        | 0.386596347                   | 1352263399                         | 686.5452387                    |
| 61170317.18                   | 50.87235351                                        | -0.111290324                  | 1651598564                         | 539.0686069                    |
| 15150705.5                    | 28.75525695                                        | -1.995897705                  | 409069048.6                        | 384.9239944                    |
| 16691591.8                    | 27.08051317                                        | 0.334985819                   | 450672978.7                        | 405.0910845                    |
| 104094487.5                   | 51.95329                                           | 0.324767602                   | 2810551163                         | 667.3924846                    |
| 16239432.75                   | 51.82077742                                        | -0.365786584                  | 438464684.3                        | 676.6640669                    |
| 127083602.7                   | 51.56132437                                        | -1.467506104                  | 3431257274                         | 1005.846696                    |
| 14626529.1                    | 31.24036401                                        | -0.198193928                  | 394916285.8                        | 384.2102739                    |
| 22787749.22                   | 37.9077792                                         | -1.236360666                  | 615269228.8                        | 318.3341389                    |
| 14191762.94                   | 28.93328264                                        | 1.001145224                   | 383177599.5                        | 300.7688589                    |
| 75826118.83                   | 78.89416852                                        | -2.266418492                  | 2047305208                         | 656.1982453                    |
| 43108609.58                   | 70.21992452                                        | -3.563702299                  | 1163932459                         | 625.4745404                    |
| 32982180.27                   | 42.37490942                                        | 1.900249708                   | 890518867.2                        | 483.4236023                    |
| 104697817.3                   | 52.26169675                                        | 0.19479837                    | 2826841068                         | 1163.310463                    |
| 5088342.544                   | 36.25572714                                        | -0.753074677                  | 137385248.7                        | 353.4232549                    |
| 6030541.337                   | 38.58210044                                        | 0.802161806                   | 162824616.1                        | 408.0223678                    |
| 5756506.535                   | 29.92446186                                        | -0.187220913                  | 155425676.5                        | 257.3830115                    |
| 62255295.28                   | 58.08789922                                        | 4.425463931                   | 1680892973                         | 562.5441742                    |
| 61723923.72                   | 65.33068344                                        | -2.118101471                  | 1666545940                         | 544.2429871                    |
| 24369375.79                   | 35.7355027                                         | -0.211744818                  | 657973149.3                        | 295.6231341                    |
| 10178461.69                   | 39.33077557                                        | 0.732446686                   | 274818465.6                        | 486.5420727                    |
| 13430894.02                   | 41.46968407                                        | -1.253839751                  | 362634138.6                        | 480.157423                     |
| 25368361.15                   | 52.72267875                                        | -5.824082643                  | 684945751                          | 524.2460808                    |
| 66444715.7                    | 54.80349577                                        | -0.753893324                  | 1794007324                         | 630.3416699                    |
| 64240981.9                    | 61.05712303                                        | 4.074257408                   | 1734506511                         | 555.6712238                    |
| 16883042.7                    | 44.62852017                                        | -2.370725272                  | 455842153                          | 453.9560481                    |
| 118369828                     | 49.3268971                                         | -2.547809241                  | 3195985357                         | 517.0391241                    |
| 35393318.01                   | 70.22226355                                        | 5.497637203                   | 955619586.2                        | 499.4127209                    |
| 19767063.75                   | 38.32206521                                        | 0.215663537                   | 533710721.3                        | 335.8383414                    |
| 71091461.97                   | 47.16228184                                        | 0.579234851                   | 1919469473                         | 580.6922664                    |
| 133128067.9                   | 63.56848418                                        | 1.937376845                   | 3594457833                         | 623.8466646                    |
| 1479487.151                   | 20.94573265                                        | -0.007793139                  | 39946153.08                        | 173.1228575                    |
| 65003765.25                   | 51.55423539                                        | 0.766535943                   | 1755101662                         | 706.3194201                    |
| 23405324.68                   | 66.61446357                                        | 4.921504247                   | 631943766.2                        | 567.5512488                    |
| 139178717.7                   | 64.92579675                                        | 0.503431747                   | 3757825378                         | 954.1911238                    |
| 76242171.89                   | 48.77660424                                        | 1.143998337                   | 2058538641                         | 690.9283697                    |
| 31592248.8                    | 50.19789689                                        | 0.9975557                     | 852990717.7                        | 408.591612                     |
| 17171705.4                    | 46.73337548                                        | -0.567691942                  | 463636045.7                        | 584.3518887                    |
| 66711773.74                   | 55.4428755                                         | 1.365979109                   | 1801217891                         | 674.9603708                    |
| 9368655.869                   | 27.62170614                                        | -0.332146857                  | 252953708.5                        | 337.0749931                    |
| 38369437.12                   | 61.55622843                                        | 4.635696742                   | 1035974802                         | 542.9502876                    |
| 50930166.4                    | 44.12537954                                        | 1.440342097                   | 1375114493                         | 609.4068067                    |
| 13613931.72                   | 43.68926118                                        | -4.837150651                  | 367576156.6                        | 573.4596639                    |
| 70231766.53                   | 59.33278865                                        | -1.05535839                   | 1896257696                         | 927.6755891                    |
| 4327749.318                   | 28.26140259                                        | 0.323566783                   | 116849231.6                        | 305.0750162                    |
| 15332768.66                   | 42.13163574                                        | 0.061335944                   | 413984753.7                        | 367.2019296                    |
| 42906323.36                   | 66.55058722                                        | 6.673131682                   | 1158470731                         | 603.3085595                    |
| 53974672.33                   | 73.11377534                                        | 5.129155708                   | 1457316153                         | 620.5694226                    |
| 12790206.54                   | 34.81453494                                        | 0.172219609                   | 345335576.7                        | 370.7827434                    |
| 29238228.66                   | 36.70941308                                        | 0.01756748                    | 789432173.8                        | 553.8636576                    |
| 23686656.45                   | 38.23481775                                        | -0.917974696                  | 639539724.1                        | 367.7028979                    |
| 66451909.24                   | 69.36397735                                        | 11.81015587                   | 1794201549                         | 518.590395                     |
| 751383.0206                   | 9.863157374                                        | 0.044117682                   | 20287341.56                        | 101.0538868                    |
| 31206037.16                   | 54.57563532                                        | -0.129999177                  | 842563003.2                        | 468.655374                     |
| 24220549.02                   | 38.08613253                                        | 0.12087971                    | 653954823.5                        | 582.2920693                    |
| 18334886.3                    | 45.80443181                                        | 1.406224201                   | 495041930.1                        | 537.940549                     |
| 8108839.539                   | 27.54126566                                        | 0.339915241                   | 218938667.6                        | 318.722827                     |
| 5330516.126                   | 26.24802227                                        | -0.294387889                  | 143923935.4                        | 398.8640081                    |
| 51065813                      | 63.40501815                                        | 8.406588117                   | 1378776951                         | 853.6891481                    |
| 74235774.66                   | 57.43938529                                        | -1.279133034                  | 2004365916                         | 508.7214565                    |
| 32795654.46                   | 44.40930299                                        | 0.33545043                    | 885482670.4                        | 535.016912                     |
| 84270342.96                   | 57.1857263                                         | -2.780077143                  | 2275299260                         | 895.5325927                    |
| 88064430.72                   | 67.74692739                                        | 6.642040235                   | 2377739629                         | 696.4053102                    |
| 12551751.26                   | 29.75735985                                        | 0.581946947                   | 338897284                          | 385.3704397                    |
| 5380897.356                   | 31.39127307                                        | -1.099904001                  | 145284228.6                        | 442.8411319                    |
| 2063960.526                   | 24.35399173                                        | 0.574998087                   | 55726934.2                         | 236.9099296                    |
| 108951555.6                   | 53.70343466                                        | 3.212125891                   | 2941692001                         | 698.2950271                    |





| wavelet.HHH_glrIm_LowGrayLevelRunEmphasis | wavelet.HHH_glrIm_GrayLevelNonUniformityNormalized | wavelet.HHH_glrIm_RunVariance | wavelet.HHH_glrIm_GrayLevelNonUniformity | wavelet.HHH_glrIm_LongRunEmphasis |
|-------------------------------------------|----------------------------------------------------|-------------------------------|------------------------------------------|-----------------------------------|
| 0.002033277                               | 0.051347812                                        | 0.045735561                   | 104.4755777                              | 1.133954762                       |
| 0.005914478                               | 0.069605233                                        | 0.055240452                   | 61.90831927                              | 1.160904561                       |
| 0.007696961                               | 0.072692863                                        | 0.069860818                   | 104.8324126                              | 1.202559439                       |
| 0.008237762                               | 0.115672367                                        | 0.111941784                   | 102.778025                               | 1.322055616                       |
| 0.00158464                                | 0.068756362                                        | 0.066372508                   | 153.6340175                              | 1.189979029                       |
| 0.002779482                               | 0.046416754                                        | 0.036179395                   | 29.61358026                              | 1.106511068                       |
| 0.005036245                               | 0.071974325                                        | 0.077906047                   | 380.6624862                              | 1.220581959                       |
| 0.00397283                                | 0.112640218                                        | 0.123099183                   | 520.549646                               | 1.345449043                       |
| 0.004839667                               | 0.085343209                                        | 0.090044495                   | 359.3784398                              | 1.256538508                       |
| 0.009440236                               | 0.100001709                                        | 0.093348896                   | 98.85895722                              | 1.27006385                        |
| 0.00211174                                | 0.106344689                                        | 0.124576224                   | 145.3063355                              | 1.346694222                       |
| 0.003301841                               | 0.084387586                                        | 0.075514433                   | 181.9251702                              | 1.219213627                       |
| 0.004238871                               | 0.145833414                                        | 0.176791416                   | 237.6874872                              | 1.490791324                       |
| 0.001046425                               | 0.078932886                                        | 0.085493973                   | 126.0819094                              | 1.241743446                       |
| 0.00387144                                | 0.094200126                                        | 0.094043604                   | 172.3770294                              | 1.270843438                       |
| 0.001220704                               | 0.07754567                                         | 0.089875325                   | 314.7887476                              | 1.253756305                       |
| 0.003525127                               | 0.063264622                                        | 0.055300023                   | 71.89140284                              | 1.159687844                       |
| 0.008288581                               | 0.137104395                                        | 0.141849148                   | 150.6424712                              | 1.403104471                       |
| 0.003118926                               | 0.081182173                                        | 0.075316513                   | 98.36694314                              | 1.223427713                       |
| 0.002464017                               | 0.092742443                                        | 0.094151522                   | 445.1718662                              | 1.267961173                       |
| 0.004048219                               | 0.112442178                                        | 0.141982509                   | 304.2206629                              | 1.393754489                       |
| 0.009326521                               | 0.098132489                                        | 0.079758517                   | 98.51890685                              | 1.235737913                       |
| 0.006493964                               | 0.059536595                                        | 0.053370194                   | 58.07135451                              | 1.156126384                       |
| 0.001354151                               | 0.063712205                                        | 0.07328239                    | 158.3973782                              | 1.207500405                       |
| 0.009555901                               | 0.109266581                                        | 0.093524105                   | 128.2086909                              | 1.271485435                       |
| 0.001726017                               | 0.068210013                                        | 0.075369108                   | 151.9966149                              | 1.207259587                       |
| 0.002004952                               | 0.058010114                                        | 0.055399872                   | 178.4423851                              | 1.160883774                       |
| 0.006398485                               | 0.117754549                                        | 0.116965897                   | 295.0429494                              | 1.332683846                       |
| 0.009107227                               | 0.075910198                                        | 0.052629006                   | 32.32557458                              | 1.155009151                       |
| 0.001408366                               | 0.060248665                                        | 0.057144656                   | 117.5879093                              | 1.165352173                       |
| 0.0027079                                 | 0.111156917                                        | 0.130213794                   | 476.0030778                              | 1.366258489                       |
| 0.001357316                               | 0.046649272                                        | 0.052169547                   | 92.14836294                              | 1.150351712                       |
| 0.00251053                                | 0.059384353                                        | 0.067427605                   | 180.8175931                              | 1.193453988                       |
| 0.003116441                               | 0.053405837                                        | 0.047622501                   | 120.0752433                              | 1.141105569                       |
| 0.002034569                               | 0.069904409                                        | 0.06577869                    | 290.3139399                              | 1.190969638                       |
| 0.003298265                               | 0.119556812                                        | 0.131355605                   | 322.5233322                              | 1.36835549                        |
| 0.004246072                               | 0.125824643                                        | 0.150571096                   | 415.8335212                              | 1.420114522                       |
| 0.001468362                               | 0.067370584                                        | 0.096409096                   | 322.5161539                              | 1.261030291                       |
| 0.00209594                                | 0.07160628                                         | 0.057356605                   | 83.51029273                              | 1.170120078                       |
| 0.000421627                               | 0.069026227                                        | 0.075037731                   | 470.3720007                              | 1.214641103                       |
| 0.00523529                                | 0.11047978                                         | 0.123319863                   | 259.2113173                              | 1.346912543                       |
| 0.005121756                               | 0.096585968                                        | 0.086142552                   | 345.7981052                              | 1.253239767                       |
| 0.00435502                                | 0.121173999                                        | 0.129348142                   | 398.8537568                              | 1.362239456                       |
| 0.002007418                               | 0.04640717                                         | 0.043137501                   | 110.9326811                              | 1.126933748                       |
| 0.003515383                               | 0.052151404                                        | 0.055491386                   | 63.41437981                              | 1.1608645                         |
| 0.002717165                               | 0.083409118                                        | 0.085861253                   | 213.0581351                              | 1.243893019                       |
| 0.000673101                               | 0.067790674                                        | 0.072884484                   | 290.339566                               | 1.20810857                        |
| 0.006244554                               | 0.100378868                                        | 0.090559468                   | 80.50396368                              | 1.270894031                       |
| 0.006595831                               | 0.094365081                                        | 0.085560036                   | 74.59810128                              | 1.245177193                       |
| 0.005723359                               | 0.118099783                                        | 0.115707788                   | 144.9801051                              | 1.329917874                       |
| 0.002901717                               | 0.061092419                                        | 0.067904393                   | 148.0450116                              | 1.19346287                        |
| 0.002047413                               | 0.056614406                                        | 0.047643939                   | 182.6695239                              | 1.139771862                       |
| 0.002346525                               | 0.101350452                                        | 0.095704001                   | 420.8759548                              | 1.27697549                        |
| 0.002354161                               | 0.092650472                                        | 0.087240019                   | 94.76303729                              | 1.254382971                       |
| 0.004891317                               | 0.08617115                                         | 0.091322475                   | 106.0844435                              | 1.258977889                       |
| 0.002047417                               | 0.069322977                                        | 0.062107867                   | 127.7571711                              | 1.182807865                       |
| 0.001722948                               | 0.065335792                                        | 0.068328862                   | 248.849515                               | 1.197202791                       |
| 0.001768067                               | 0.059622916                                        | 0.059975998                   | 195.3083479                              | 1.175622943                       |
| 0.003276793                               | 0.080415511                                        | 0.076551878                   | 123.9027673                              | 1.22099932                        |
| 0.002316508                               | 0.071885124                                        | 0.083601877                   | 612.0971281                              | 1.233942458                       |
| 0.003221182                               | 0.053292846                                        | 0.048908357                   | 89.94917587                              | 1.144271396                       |
| 0.003859371                               | 0.092536663                                        | 0.087467535                   | 228.6186167                              | 1.25604908                        |
| 0.000824267                               | 0.076592466                                        | 0.077150984                   | 414.5969303                              | 1.22322288                        |
| 0.000835773                               | 0.058133869                                        | 0.051573406                   | 422.6322808                              | 1.151511192                       |
| 0.024900057                               | 0.167495039                                        | 0.170140558                   | 115.2821302                              | 1.490303368                       |
| 0.001540101                               | 0.068377371                                        | 0.076932546                   | 247.1697848                              | 1.218927581                       |
| 0.003099003                               | 0.05657246                                         | 0.051544812                   | 70.35093417                              | 1.15116203                        |
| 0.000389444                               | 0.055921711                                        | 0.055636584                   | 332.3654378                              | 1.162042335                       |
| 0.001442541                               | 0.073856904                                        | 0.065682958                   | 408.0080963                              | 1.190206327                       |
| 0.002083145                               | 0.073325123                                        | 0.068816343                   | 199.9631155                              | 1.198808322                       |
| 0.002026674                               | 0.07614458                                         | 0.076296577                   | 92.57779473                              | 1.21916733                        |
| 0.001117396                               | 0.065684104                                        | 0.062717205                   | 266.4292215                              | 1.181992029                       |
| 0.007186269                               | 0.124525374                                        | 0.139262051                   | 253.9586355                              | 1.388953198                       |
| 0.002741258                               | 0.060683556                                        | 0.056867875                   | 130.247033                               | 1.1649474249                      |
| 0.001325943                               | 0.07810894                                         | 0.096142725                   | 226.0599514                              | 1.269459109                       |
| 0.005600487                               | 0.081671042                                        | 0.070317946                   | 102.5182861                              | 1.214260224                       |
| 0.001529464                               | 0.05989985                                         | 0.070358406                   | 135.1717142                              | 1.198246102                       |
| 0.010819162                               | 0.123779878                                        | 0.12594689                    | 106.8215541                              | 1.359164287                       |
| 0.002942729                               | 0.084965954                                        | 0.07618121                    | 135.3678                                 | 1.224606744                       |
| 0.002028057                               | 0.056650827                                        | 0.04907607                    | 126.6910187                              | 1.143750931                       |
| 0.002852051                               | 0.050458566                                        | 0.04414602                    | 96.3903695                               | 1.12873617                        |
| 0.003638354                               | 0.099440382                                        | 0.113101257                   | 163.0639841                              | 1.318996956                       |
| 0.003270198                               | 0.094009223                                        | 0.106093729                   | 281.8234757                              | 1.29745605                        |
| 0.004157326                               | 0.091952617                                        | 0.098311706                   | 260.3551131                              | 1.277826546                       |
| 0.005645028                               | 0.052688682                                        | 0.062690755                   | 121.6513882                              | 1.180907536                       |
| 0.0039167565                              | 0.305167415                                        | 0.434038447                   | 351.8168924                              | 2.211473782                       |
| 0.003429833                               | 0.067788811                                        | 0.059399809                   | 153.1498985                              | 1.174372121                       |
| 0.003756428                               | 0.092041896                                        | 0.093823324                   | 233.1893435                              | 1.266102232                       |
| 0.002221215                               | 0.077782588                                        | 0.072050718                   | 106.8734387                              | 1.20814114                        |
| 0.00461646                                | 0.125476703                                        | 0.13242587                    | 227.9753456                              | 1.376102807                       |
| 0.004644874                               | 0.131105452                                        | 0.1449738                     | 151.9528281                              | 1.412103949                       |
| 0.001199068                               | 0.058326365                                        | 0.048908403                   | 132.8211521                              | 1.143713074                       |
| 0.002913312                               | 0.06367365                                         | 0.061012831                   | 312.2666496                              | 1.17852576                        |
| 0.001960035                               | 0.080862058                                        | 0.074997784                   | 249.8891917                              | 1.216172856                       |
| 0.001440441                               | 0.062659122                                        | 0.061562679                   | 258.1744604                              | 1.177871224                       |
| 0.001643872                               | 0.053064726                                        | 0.058744192                   | 172.3698478                              | 1.169227908                       |
| 0.004577637                               | 0.119609966                                        | 0.113231627                   | 306.0610317                              | 1.326201754                       |
| 0.007986938                               | 0.110159237                                        | 0.121302677                   | 104.1318985                              | 1.349802845                       |
| 0.012923112                               | 0.145822335                                        | 0.153318217                   | 107.4829177                              | 1.435247172                       |
| 0.001490212                               | 0.065869025                                        | 0.074289644                   | 356.993654                               | 1.210942102                       |

| wavelet.HHH_glrIm_ShortRunHighGrayLevelEmphasis | wavelet.HHH_glrIm_RunLengthNonUniformity | wavelet.HHH_glrIm_ShortRunEmphasis | wavelet.HHH_glrIm_LongRunHighGrayLevelEmphasis | wavelet.HHH_glrIm_RunPercentage |
|-------------------------------------------------|------------------------------------------|------------------------------------|------------------------------------------------|---------------------------------|
| 950.652087                                      | 1875.266136                              | 0.968973748                        | 1107.883258                                    | 0.958819691                     |
| 393.6770791                                     | 807.6717518                              | 0.963306986                        | 470.269984                                     | 0.951213492                     |
| 315.5877881                                     | 1281.622908                              | 0.954800808                        | 393.5113979                                    | 0.940076221                     |
| 179.0914463                                     | 742.6176324                              | 0.931371318                        | 252.4902362                                    | 0.909377214                     |
| 974.6291349                                     | 2000.222796                              | 0.957828484                        | 1206.00434                                     | 0.943574584                     |
| 1510.304616                                     | 597.2641325                              | 0.974978835                        | 1702.139812                                    | 0.966666667                     |
| 379.8456674                                     | 4666.24165                               | 0.952096367                        | 485.0304559                                    | 0.935858868                     |
| 294.1163872                                     | 3834.506809                              | 0.928599321                        | 422.9120364                                    | 0.904704536                     |
| 303.8373614                                     | 3644.965468                              | 0.944746733                        | 401.5209159                                    | 0.926275001                     |
| 180.8542372                                     | 847.1840429                              | 0.941092704                        | 242.0245759                                    | 0.922144087                     |
| 723.2077801                                     | 1138.17146                               | 0.929475487                        | 1043.360469                                    | 0.905835544                     |
| 414.3057271                                     | 1896.383701                              | 0.951163872                        | 527.8097334                                    | 0.935257801                     |
| 282.6556916                                     | 1268.275436                              | 0.903717595                        | 462.3434332                                    | 0.872852375                     |
| 2659.400933                                     | 1394.068418                              | 0.948009262                        | 3472.362419                                    | 0.930245061                     |
| 334.9428791                                     | 1569.51618                               | 0.941240938                        | 448.3132411                                    | 0.922262717                     |
| 1140.390341                                     | 3526.668757                              | 0.945947097                        | 1508.723347                                    | 0.927576993                     |
| 516.1343512                                     | 1033.611698                              | 0.963893566                        | 618.8011891                                    | 0.951745909                     |
| 150.782737                                      | 886.9181223                              | 0.917598062                        | 227.3346723                                    | 0.891072431                     |
| 497.6832279                                     | 1060.073842                              | 0.949121168                        | 638.3415315                                    | 0.933507171                     |
| 579.6401035                                     | 4129.351195                              | 0.942501824                        | 777.1302949                                    | 0.923254472                     |
| 291.8115602                                     | 2204.377605                              | 0.921019582                        | 437.4793353                                    | 0.894663207                     |
| 156.4933834                                     | 873.0063078                              | 0.9466834                          | 202.8282238                                    | 0.930419904                     |
| 430.4965905                                     | 887.774757                               | 0.964154964                        | 514.8649021                                    | 0.952524038                     |
| 1456.161737                                     | 2210.033687                              | 0.954964979                        | 1835.350278                                    | 0.939234547                     |
| 155.702049                                      | 1004.657132                              | 0.940687201                        | 207.1409517                                    | 0.921687111                     |
| 916.3523171                                     | 1988.081673                              | 0.956262923                        | 1153.254862                                    | 0.940448745                     |
| 711.3683885                                     | 2796.364019                              | 0.963553914                        | 850.901816                                     | 0.951438293                     |
| 203.8359548                                     | 2086.530285                              | 0.930043182                        | 288.8954547                                    | 0.907146438                     |
| 213.5399666                                     | 387.7561115                              | 0.964275309                        | 254.1493387                                    | 0.952675959                     |
| 1309.878347                                     | 1769.244068                              | 0.962619683                        | 1580.737596                                    | 0.950153547                     |
| 481.6750825                                     | 3520.328189                              | 0.924839598                        | 706.9895895                                    | 0.899925631                     |
| 1481.250521                                     | 1808.645029                              | 0.966178741                        | 1755.820557                                    | 0.95467896                      |
| 707.9635966                                     | 2723.450412                              | 0.957218383                        | 876.8044196                                    | 0.942921123                     |
| 565.9090285                                     | 2063.320557                              | 0.96710639                         | 665.1820527                                    | 0.956759411                     |
| 643.9885309                                     | 3710.158039                              | 0.957044171                        | 798.7957454                                    | 0.942971425                     |
| 359.1815915                                     | 2214.655782                              | 0.924400027                        | 527.8682257                                    | 0.899479314                     |
| 288.3119495                                     | 2653.95393                               | 0.915718352                        | 444.2543086                                    | 0.88807806                      |
| 1095.92676                                      | 4172.3029                                | 0.946928728                        | 1450.459297                                    | 0.927443996                     |
| 645.8871521                                     | 1051.400088                              | 0.96059689                         | 784.3499832                                    | 0.948155097                     |
| 3628.374506                                     | 6028.047908                              | 0.952990416                        | 4618.438028                                    | 0.937276479                     |
| 262.7530254                                     | 1946.449972                              | 0.928372443                        | 378.4014616                                    | 0.904454066                     |
| 236.962728                                      | 3085.364605                              | 0.943392724                        | 312.0721848                                    | 0.925822045                     |
| 257.2799384                                     | 2710.112731                              | 0.925521018                        | 377.6244791                                    | 0.901008655                     |
| 938.460836                                      | 2212.165113                              | 0.970466975                        | 1086.532275                                    | 0.960796438                     |
| 780.9568251                                     | 1105.803478                              | 0.963653962                        | 932.3500507                                    | 0.951486698                     |
| 547.220117                                      | 2231.648684                              | 0.947744862                        | 713.1997269                                    | 0.930418944                     |
| 2470.360762                                     | 3797.741156                              | 0.954175109                        | 3119.907593                                    | 0.938792028                     |
| 234.9850161                                     | 683.1775305                              | 0.938840254                        | 1155.7241439                                   | 0.920780712                     |
| 239.3365457                                     | 687.0301192                              | 0.946507143                        | 311.7768134                                    | 0.928861972                     |
| 229.6548972                                     | 1023.285647                              | 0.930367053                        | 326.3514278                                    | 0.907885753                     |
| 709.2448505                                     | 2171.418447                              | 0.957665904                        | 880.1671185                                    | 0.943288319                     |
| 705.6085294                                     | 2964.390796                              | 0.967704042                        | 827.665268                                     | 0.957145791                     |
| 484.7097739                                     | 3544.524152                              | 0.939585489                        | 656.1151664                                    | 0.920332106                     |
| 833.4227071                                     | 883.7593423                              | 0.943900059                        | 1105.623414                                    | 0.926351728                     |
| 381.9564527                                     | 1063.940702                              | 0.944328099                        | 503.1955816                                    | 0.925621747                     |
| 732.1381013                                     | 1652.47147                               | 0.958257794                        | 902.206188                                     | 0.945088757                     |
| 977.0677316                                     | 3394.810269                              | 0.956047017                        | 1218.602516                                    | 0.941561282                     |
| 866.2766416                                     | 2952.995564                              | 0.960159896                        | 1056.432286                                    | 0.947323931                     |
| 455.2212429                                     | 1354.631266                              | 0.950979183                        | 580.6698355                                    | 0.934932786                     |
| 544.9306988                                     | 7475.156881                              | 0.950146954                        | 702.076933                                     | 0.932708107                     |
| 572.8498789                                     | 1546.091947                              | 0.966563706                        | 672.3601805                                    | 0.955745274                     |
| 335.4139946                                     | 2127.779783                              | 0.943110552                        | 443.8798425                                    | 0.925266494                     |
| 1583.774771                                     | 4765.822023                              | 0.95113571                         | 2030.985801                                    | 0.935035944                     |
| 1534.580447                                     | 6631.121907                              | 0.965024918                        | 1829.261187                                    | 0.953682681                     |
| 53.75119378                                     | 531.3534897                              | 0.900274105                        | 87.59973022                                    | 0.871080817                     |
| 974.014807                                      | 3188.425022                              | 0.952129556                        | 1240.106324                                    | 0.935983747                     |
| 567.3071393                                     | 1134.372082                              | 0.964983975                        | 675.4478826                                    | 0.95369278                      |
| 4553.476879                                     | 5394.387356                              | 0.963083277                        | 5490.874976                                    | 0.950953846                     |
| 1033.223736                                     | 4937.654713                              | 0.95728063                         | 1281.764628                                    | 0.943184355                     |
| 639.2618058                                     | 2428.490715                              | 0.955723615                        | 799.3566048                                    | 0.941020332                     |
| 901.5052941                                     | 1072.525136                              | 0.951978238                        | 1153.337637                                    | 0.935867827                     |
| 1236.326707                                     | 3641.922268                              | 0.958936188                        | 1520.260709                                    | 0.945490407                     |
| 175.5457413                                     | 1660.815401                              | 0.921311051                        | 261.2380805                                    | 0.894825666                     |
| 713.1680366                                     | 1945.26624                               | 0.962609284                        | 859.9705355                                    | 0.950114074                     |
| 1089.448174                                     | 2500.71858                               | 0.943524551                        | 1459.422751                                    | 0.924207061                     |
| 274.4293087                                     | 1100.28201                               | 0.949755661                        | 346.6110072                                    | 0.935343345                     |
| 1328.953925                                     | 2015.558891                              | 0.956907665                        | 1652.791971                                    | 0.941794016                     |
| 153.0559197                                     | 709.6089291                              | 0.92496138                         | 221.9505924                                    | 0.900835073                     |
| 492.7099442                                     | 1394.469997                              | 0.94927632                         | 632.9694674                                    | 0.933351359                     |
| 757.130588                                      | 2050.337109                              | 0.966879644                        | 895.0473675                                    | 0.956095636                     |
| 957.4503747                                     | 1766.509365                              | 0.970257433                        | 1108.303318                                    | 0.960397571                     |
| 367.8884032                                     | 1378.950968                              | 0.933424824                        | 515.4751563                                    | 0.911361013                     |
| 447.9016432                                     | 2550.942536                              | 0.937991791                        | 615.8279012                                    | 0.916911782                     |
| 333.256165                                      | 2429.480251                              | 0.941165574                        | 449.5443249                                    | 0.921399785                     |
| 527.4069925                                     | 2080.795768                              | 0.959785346                        | 649.1238643                                    | 0.946573312                     |
| 25.35807323                                     | 696.3580778                              | 0.802773748                        | 68.43339015                                    | 0.752159068                     |
| 465.565559                                      | 2034.697044                              | 0.960143772                        | 567.2168017                                    | 0.94726657                      |
| 450.1048964                                     | 2183.568339                              | 0.94308041                         | 601.4325765                                    | 0.923946586                     |
| 743.5345931                                     | 1216.97639                               | 0.953716641                        | 937.6839323                                    | 0.938472047                     |
| 258.0704622                                     | 1481.86384                               | 0.921810109                        | 383.0596                                       | 0.897169991                     |
| 286.9992396                                     | 930.7672456                              | 0.915831762                        | 440.2014982                                    | 0.888744691                     |
| 1471.233039                                     | 2087.325459                              | 0.966786027                        | 1739.492454                                    | 0.956016276                     |
| 509.354722                                      | 4407.705093                              | 0.959350707                        | 622.5201301                                    | 0.946199855                     |
| 788.3678141                                     | 2727.203319                              | 0.95222656                         | 1003.761113                                    | 0.936456876                     |
| 1041.676544                                     | 3709.158389                              | 0.959929823                        | 1271.278036                                    | 0.946744202                     |
| 993.9001211                                     | 2941.090347                              | 0.962102999                        | 1201.586771                                    | 0.9491975                       |
| 260.5157734                                     | 2132.086792                              | 0.930246502                        | 369.6020631                                    | 0.908303979                     |
| 176.044381                                      | 778.9188025                              | 0.925821601                        | 254.9972569                                    | 0.902725737                     |
| 104.9126321                                     | 584.4180565                              | 0.911032852                        | 163.3937826                                    | 0.883693046                     |
| 1108.020876                                     | 4809.371459                              | 0.954092789                        | 1399.388288                                    | 0.938557459                     |

| wavelet.HHH_glrIm_LongRunLowGrayLevelEmphasis | wavelet.HHH_glrIm_RunEntropy | wavelet.HHH_glrIm_HighGrayLevelRunEmphasis | wavelet.HHH_glrIm_RunLengthNonUniformityNormalized | wavelet.HHH_glszm_GrayLevelVariance |
|-----------------------------------------------|------------------------------|--------------------------------------------|----------------------------------------------------|-------------------------------------|
| 0.002185383                                   | 4.869852327                  | 980.2326745                                | 0.921433003                                        | 54.55294796                         |
| 0.006360927                                   | 4.461308366                  | 407.9016812                                | 0.907885645                                        | 34.72345201                         |
| 0.008457446                                   | 4.465123316                  | 329.7745255                                | 0.888197352                                        | 31.49586508                         |
| 0.010052342                                   | 3.916123685                  | 192.0137777                                | 0.8354918                                          | 17.38999807                         |
| 0.001783114                                   | 4.605674027                  | 1016.685869                                | 0.894999533                                        | 42.57156956                         |
| 0.002855992                                   | 5.023272491                  | 1546.759836                                | 0.936043211                                        | 88.00530612                         |
| 0.005668648                                   | 4.496121447                  | 398.6278889                                | 0.881926111                                        | 31.14054579                         |
| 0.005130773                                   | 4.025228596                  | 316.2070238                                | 0.829519382                                        | 20.09857497                         |
| 0.005716116                                   | 4.302473222                  | 321.1791407                                | 0.865197507                                        | 26.07576219                         |
| 0.011002432                                   | 4.04016483                   | 191.8212313                                | 0.856740813                                        | 19.07510759                         |
| 0.002570384                                   | 4.089231919                  | 777.4057001                                | 0.832096841                                        | 22.9414703                          |
| 0.003845781                                   | 4.258362307                  | 434.9876359                                | 0.879463955                                        | 25.73955621                         |
| 0.005871907                                   | 3.82655335                   | 312.1688724                                | 0.777831572                                        | 19.19718512                         |
| 0.001134352                                   | 4.556109728                  | 2803.282926                                | 0.87251795                                         | 86.85659039                         |
| 0.004699971                                   | 4.147331362                  | 355.141181                                 | 0.85728072                                         | 21.8435456                          |
| 0.001438155                                   | 4.494064748                  | 1205.07904                                 | 0.86816753                                         | 37.34343635                         |
| 0.00386135                                    | 4.565611713                  | 535.0011945                                | 0.909342752                                        | 36.07165572                         |
| 0.010959817                                   | 3.713752418                  | 163.8261701                                | 0.80657839                                         | 14.14950609                         |
| 0.003577701                                   | 4.35538478                   | 523.7982758                                | 0.874603321                                        | 30.35075731                         |
| 0.002917763                                   | 4.208266899                  | 614.5619799                                | 0.860009571                                        | 26.68982986                         |
| 0.005374813                                   | 4.048263637                  | 316.1822331                                | 0.813963093                                        | 19.31158099                         |
| 0.010984391                                   | 3.983565078                  | 165.0347734                                | 0.869195368                                        | 15.57477876                         |
| 0.007143003                                   | 4.652068009                  | 446.2733129                                | 0.909883362                                        | 40.00757059                         |
| 0.001498292                                   | 4.798150745                  | 1523.844805                                | 0.888634448                                        | 64.90807896                         |
| 0.011446402                                   | 3.887682708                  | 164.9415184                                | 0.855914064                                        | 14.69010642                         |
| 0.001954016                                   | 4.662891621                  | 957.6128773                                | 0.891835308                                        | 50.01006353                         |
| 0.002251132                                   | 4.706117676                  | 737.1670683                                | 0.908690286                                        | 41.27910884                         |
| 0.008047046                                   | 3.887699813                  | 218.633958                                 | 0.83255079                                         | 16.36618966                         |
| 0.009945477                                   | 4.225602317                  | 221.2148889                                | 0.810258933                                        | 22.07093287                         |
| 0.001536066                                   | 4.74252675                   | 1359.80749                                 | 0.906292217                                        | 51.78265843                         |
| 0.00344022                                    | 4.138118471                  | 520.0560813                                | 0.821681049                                        | 29.08215498                         |
| 0.001466313                                   | 5.081865501                  | 1531.739788                                | 0.915157076                                        | 79.97415436                         |
| 0.002819879                                   | 4.838591404                  | 738.5544015                                | 0.893907902                                        | 61.0829436                          |
| 0.003409547                                   | 4.79797433                   | 584.6735072                                | 0.91714941                                         | 46.42045358                         |
| 0.002337942                                   | 4.54714119                   | 672.421583                                 | 0.89313123                                         | 36.41415993                         |
| 0.004289061                                   | 3.966728533                  | 387.930135                                 | 0.820616893                                        | 21.69959372                         |
| 0.005638262                                   | 3.934805558                  | 314.3905604                                | 0.802559122                                        | 19.89972707                         |
| 0.001758165                                   | 4.766717323                  | 1155.800313                                | 0.87085338                                         | 56.52152302                         |
| 0.003178027                                   | 4.447074863                  | 671.9590048                                | 0.901322003                                        | 36.02107495                         |
| 0.000478842                                   | 4.634096965                  | 3806.220937                                | 0.88409007                                         | 48.69941095                         |
| 0.006541157                                   | 4.056252792                  | 282.5961943                                | 0.829215579                                        | 21.50858674                         |
| 0.006244037                                   | 4.060850049                  | 250.6941597                                | 0.861605038                                        | 17.89291196                         |
| 0.00571228                                    | 3.860271364                  | 277.8187699                                | 0.822986458                                        | 14.97458806                         |
| 0.002165051                                   | 5.021024363                  | 966.4731729                                | 0.925135029                                        | 65.63445309                         |
| 0.003779353                                   | 5.010202362                  | 808.9337381                                | 0.908975221                                        | 77.69645084                         |
| 0.003186153                                   | 4.391206672                  | 576.5439158                                | 0.87261515                                         | 34.81507756                         |
| 0.000755383                                   | 4.713939628                  | 2587.686673                                | 0.886494356                                        | 69.55081273                         |
| 0.00742242                                    | 4.03131199                   | 249.8407416                                | 0.85147782                                         | 20.69103579                         |
| 0.007678255                                   | 4.105884626                  | 252.3559141                                | 0.868902548                                        | 20.72862004                         |
| 0.007141024                                   | 3.871828154                  | 246.4792321                                | 0.833277475                                        | 16.16217843                         |
| 0.003215078                                   | 4.812234144                  | 739.9687838                                | 0.895269956                                        | 59.20405424                         |
| 0.002260789                                   | 4.710498666                  | 728.4903566                                | 0.918452598                                        | 41.9445703                          |
| 0.002906299                                   | 4.018284995                  | 515.3972116                                | 0.853304736                                        | 17.41148828                         |
| 0.002649389                                   | 4.17394563                   | 882.6161966                                | 0.863371804                                        | 30.78498661                         |
| 0.005597737                                   | 4.319996671                  | 403.4348184                                | 0.864033696                                        | 32.3247843                          |
| 0.002299308                                   | 4.494034763                  | 763.7317315                                | 0.896122844                                        | 33.6855971                          |
| 0.001928873                                   | 4.648806489                  | 1021.102071                                | 0.890941595                                        | 41.64045787                         |
| 0.001981709                                   | 4.734317456                  | 901.3814253                                | 0.900796395                                        | 44.99331942                         |
| 0.003780571                                   | 4.353748123                  | 477.9335544                                | 0.879004094                                        | 29.48481516                         |
| 0.002761988                                   | 4.55349422                   | 572.5811237                                | 0.877548294                                        | 35.04288724                         |
| 0.003526971                                   | 4.770940807                  | 591.6241895                                | 0.915701399                                        | 44.49038227                         |
| 0.004639152                                   | 4.191944964                  | 355.1587169                                | 0.861058212                                        | 23.77297113                         |
| 0.000961263                                   | 4.448885964                  | 1664.407334                                | 0.879835934                                        | 35.03300021                         |
| 0.000934571                                   | 4.698428908                  | 1589.887316                                | 0.911902735                                        | 40.85516446                         |
| 0.034347223                                   | 3.478507402                  | 59.45917581                                | 0.771312642                                        | 9.014508724                         |
| 0.001766465                                   | 4.64871827                   | 1021.816222                                | 0.881812751                                        | 48.99782357                         |
| 0.003393725                                   | 4.693950851                  | 587.5689455                                | 0.911854772                                        | 42.20882455                         |
| 0.000424232                                   | 4.816730267                  | 4727.473851                                | 0.90733987                                         | 53.69401361                         |
| 0.001624938                                   | 4.472761328                  | 1078.828097                                | 0.893623084                                        | 35.91567518                         |
| 0.002399973                                   | 4.415935045                  | 668.4893086                                | 0.890180494                                        | 28.47681331                         |
| 0.002265604                                   | 4.460198612                  | 946.8478625                                | 0.881744531                                        | 38.6800357                          |
| 0.001263925                                   | 4.603929085                  | 1288.560774                                | 0.897579309                                        | 40.50158424                         |
| 0.009411718                                   | 3.881345917                  | 189.9901748                                | 0.814125061                                        | 16.64283994                         |
| 0.002982349                                   | 4.65258748                   | 740.2940597                                | 0.906172907                                        | 41.62145753                         |
| 0.001571892                                   | 4.593633367                  | 1153.64973                                 | 0.863149326                                        | 48.52226193                         |
| 0.00646796                                    | 4.329969991                  | 288.1450724                                | 0.87609885                                         | 27.79681212                         |
| 0.001684151                                   | 4.914639616                  | 1386.897317                                | 0.89300066                                         | 77.4128561                          |
| 0.013200292                                   | 3.886752972                  | 164.9607285                                | 0.821856156                                        | 19.31805269                         |
| 0.003409092                                   | 4.268290332                  | 518.5539191                                | 0.875016354                                        | 26.94503597                         |
| 0.002231229                                   | 4.699815379                  | 782.9779505                                | 0.916483867                                        | 40.31251336                         |
| 0.002990024                                   | 4.910104682                  | 985.7921639                                | 0.924545157                                        | 60.04132968                         |
| 0.004503125                                   | 4.168859195                  | 393.4423133                                | 0.840349412                                        | 23.70009723                         |
| 0.003931822                                   | 4.27574997                   | 476.8909319                                | 0.85039332                                         | 28.76543383                         |
| 0.005033961                                   | 4.219222299                  | 353.5857599                                | 0.857398717                                        | 24.22560495                         |
| 0.006227701                                   | 4.936161301                  | 549.4975378                                | 0.900298465                                        | 61.10353134                         |
| 0.008077078                                   | 3.03894964                   | 31.40135025                                | 0.602442254                                        | 4.348674614                         |
| 0.003835832                                   | 4.503479784                  | 484.5207694                                | 0.900354337                                        | 33.3887196                          |
| 0.004349988                                   | 4.251440727                  | 476.7960264                                | 0.86149737                                         | 27.60169527                         |
| 0.002502421                                   | 4.414833278                  | 778.9193347                                | 0.88546208                                         | 35.72883939                         |
| 0.006022153                                   | 3.856437858                  | 279.592197                                 | 0.815133394                                        | 16.44561906                         |
| 0.006010389                                   | 3.84876402                   | 313.0341731                                | 0.802705545                                        | 19.05851851                         |
| 0.001298015                                   | 4.733601442                  | 1521.506059                                | 0.916262392                                        | 50.80190325                         |
| 0.003285378                                   | 4.597727032                  | 530.3523689                                | 0.898495315                                        | 35.38829293                         |
| 0.002308717                                   | 4.33475736                   | 827.3866989                                | 0.882119923                                        | 26.62126943                         |
| 0.00161613                                    | 4.717075                     | 1083.941412                                | 0.899922404                                        | 50.37366803                         |
| 0.00182402                                    | 4.933477673                  | 1031.975973                                | 0.905191848                                        | 62.31902857                         |
| 0.00580901                                    | 3.886847544                  | 279.8029869                                | 0.832914594                                        | 17.18856157                         |
| 0.009992719                                   | 4.011951465                  | 189.8342238                                | 0.823580327                                        | 19.13773153                         |
| 0.017055451                                   | 3.599343712                  | 114.7937563                                | 0.792513501                                        | 10.81365038                         |
| 0.001682783                                   | 4.715725419                  | 1160.124698                                | 0.886807669                                        | 51.00003879                         |



| wavelet.HHH_glszm_SmallAreaHighGrayLevelEmphasis | wavelet.HHH_glszm_GrayLevelNonUniformityNormalized | wavelet.HHH_glszm_SizeZoneNonUniformityNormalized | wavelet.HHH_glszm_SizeZoneNonUniformity |
|--------------------------------------------------|----------------------------------------------------|---------------------------------------------------|-----------------------------------------|
| 755.3365538                                      | 0.040429798                                        | 0.527251739                                       | 668.555205                              |
| 313.0568277                                      | 0.052320119                                        | 0.494866617                                       | 240.0103093                             |
| 243.2455576                                      | 0.052302531                                        | 0.455368084                                       | 328.3203883                             |
| 124.6221968                                      | 0.072868441                                        | 0.40788966                                        | 117.4722222                             |
| 763.3601152                                      | 0.048039536                                        | 0.50030321                                        | 580.3517241                             |
| 1270.015359                                      | 0.036111111                                        | 0.567018141                                       | 238.147619                              |
| 282.5982286                                      | 0.051968853                                        | 0.451307119                                       | 1165.274981                             |
| 235.3907233                                      | 0.069329288                                        | 0.486581234                                       | 755.6606568                             |
| 226.773149                                       | 0.057879857                                        | 0.439041149                                       | 787.2007808                             |
| 135.3989615                                      | 0.068035416                                        | 0.4369946                                         | 166.9319372                             |
| 543.0649636                                      | 0.065329957                                        | 0.43507269                                        | 220.581854                              |
| 312.6446544                                      | 0.058548177                                        | 0.446312934                                       | 428.4604167                             |
| 242.4506291                                      | 0.077374758                                        | 0.524697912                                       | 227.718894                              |
| 2134.994435                                      | 0.046863241                                        | 0.511284129                                       | 377.8389716                             |
| 268.4138025                                      | 0.063492679                                        | 0.4773512                                         | 342.7381616                             |
| 851.3427803                                      | 0.052273007                                        | 0.450309062                                       | 804.7022943                             |
| 380.421477                                       | 0.049373418                                        | 0.441896484                                       | 270.8825449                             |
| 122.9480776                                      | 0.092914079                                        | 0.447894763                                       | 128.0979021                             |
| 373.5578616                                      | 0.053932438                                        | 0.451512056                                       | 244.2680222                             |
| 444.827615                                       | 0.059545219                                        | 0.464734045                                       | 861.1521856                             |
| 229.3509523                                      | 0.06782434                                         | 0.443684275                                       | 394.4353206                             |
| 111.1825224                                      | 0.073774417                                        | 0.377901879                                       | 151.5386534                             |
| 323.4047715                                      | 0.046815828                                        | 0.455321341                                       | 244.0522388                             |
| 1107.850722                                      | 0.043568162                                        | 0.482883012                                       | 629.6794479                             |
| 129.4854652                                      | 0.075731238                                        | 0.456032295                                       | 200.1981777                             |
| 729.8918366                                      | 0.045132754                                        | 0.511531444                                       | 602.5840407                             |
| 555.4536239                                      | 0.044885991                                        | 0.478286091                                       | 816.4036321                             |
| 163.4101647                                      | 0.075107061                                        | 0.44338625                                        | 351.6052963                             |
| 156.8728405                                      | 0.060632625                                        | 0.453502812                                       | 106.1196581                             |
| 1017.867998                                      | 0.045058441                                        | 0.502075044                                       | 558.8095238                             |
| 398.4846792                                      | 0.060856359                                        | 0.497499177                                       | 702.4688385                             |
| 1142.273071                                      | 0.034998461                                        | 0.493154817                                       | 562.1964912                             |
| 544.3859048                                      | 0.041550515                                        | 0.479477585                                       | 760.4514502                             |
| 431.3388854                                      | 0.043578816                                        | 0.475438352                                       | 628.5295008                             |
| 489.7026502                                      | 0.048788578                                        | 0.476631246                                       | 999.9723546                             |
| 285.9438023                                      | 0.068059572                                        | 0.465912864                                       | 379.2530713                             |
| 227.632343                                       | 0.073764223                                        | 0.463140962                                       | 441.836478                              |
| 839.4296453                                      | 0.043157647                                        | 0.457345524                                       | 1033.600885                             |
| 477.7068724                                      | 0.052625016                                        | 0.453825573                                       | 269.5723906                             |
| 2766.696615                                      | 0.047403084                                        | 0.483019588                                       | 1606.523151                             |
| 208.6559749                                      | 0.066865732                                        | 0.479745685                                       | 375.1611253                             |
| 181.604239                                       | 0.067895839                                        | 0.422424686                                       | 589.2824373                             |
| 193.2419386                                      | 0.080631154                                        | 0.428742362                                       | 436.459725                              |
| 730.753074                                       | 0.036737185                                        | 0.506520991                                       | 746.6119403                             |
| 623.1903189                                      | 0.036480594                                        | 0.496181663                                       | 338.3958944                             |
| 408.8296621                                      | 0.054956941                                        | 0.435784896                                       | 487.2075134                             |
| 1943.909128                                      | 0.042669455                                        | 0.5111366                                         | 1061.630717                             |
| 179.1153913                                      | 0.067444116                                        | 0.404987967                                       | 117.0415225                             |
| 182.4988825                                      | 0.067002731                                        | 0.458181054                                       | 158.0724638                             |
| 172.6448506                                      | 0.074796737                                        | 0.397897711                                       | 155.5780051                             |
| 549.1816209                                      | 0.041777468                                        | 0.472488374                                       | 592.027933                              |
| 565.0658236                                      | 0.044450121                                        | 0.524247723                                       | 999.2161595                             |
| 361.6820522                                      | 0.071071951                                        | 0.43842434                                        | 678.6808786                             |
| 623.8736421                                      | 0.066253062                                        | 0.459364483                                       | 192.0143541                             |
| 291.3857654                                      | 0.053955829                                        | 0.420038986                                       | 214.6399217                             |
| 537.7810733                                      | 0.051173789                                        | 0.447488465                                       | 419.2966916                             |
| 749.9382175                                      | 0.046803004                                        | 0.478692471                                       | 937.7585503                             |
| 658.3663414                                      | 0.04484191                                         | 0.459084525                                       | 787.7890443                             |
| 360.4553932                                      | 0.05556397                                         | 0.468645806                                       | 334.14446                               |
| 425.0204534                                      | 0.048822139                                        | 0.472671508                                       | 1951.187984                             |
| 457.0815375                                      | 0.042698354                                        | 0.503916329                                       | 503.4124124                             |
| 253.8203884                                      | 0.059887767                                        | 0.435928987                                       | 431.569697                              |
| 1171.39081                                       | 0.05436473                                         | 0.446546896                                       | 1124.405083                             |
| 1160.943437                                      | 0.045538353                                        | 0.488841573                                       | 2012.071914                             |
| 47.41085831                                      | 0.109421488                                        | 0.407235996                                       | 67.19393939                             |
| 754.4808591                                      | 0.044876272                                        | 0.476901351                                       | 826.9469435                             |
| 433.4273455                                      | 0.044598764                                        | 0.480157077                                       | 329.377551                              |
| 3438.189826                                      | 0.042306647                                        | 0.485832055                                       | 1604.217444                             |
| 802.4374934                                      | 0.051501223                                        | 0.499755194                                       | 1392.817725                             |
| 471.5096036                                      | 0.054897174                                        | 0.451838952                                       | 594.6200608                             |
| 649.8471977                                      | 0.051071429                                        | 0.443035714                                       | 248.1                                   |
| 927.3316847                                      | 0.048065314                                        | 0.47031877                                        | 996.6054743                             |
| 144.4839383                                      | 0.081529309                                        | 0.446162064                                       | 275.7281553                             |
| 544.7332542                                      | 0.046562517                                        | 0.484406607                                       | 568.693356                              |
| 837.6686604                                      | 0.046761532                                        | 0.471295742                                       | 591.9474522                             |
| 218.3799849                                      | 0.056060039                                        | 0.434666531                                       | 258.1919192                             |
| 1059.596987                                      | 0.037951085                                        | 0.509070604                                       | 614.4482187                             |
| 121.9385727                                      | 0.071453168                                        | 0.438389578                                       | 115.7348485                             |
| 374.3486844                                      | 0.056098546                                        | 0.455953626                                       | 316.8877698                             |
| 575.9899506                                      | 0.046155368                                        | 0.487960071                                       | 635.8119724                             |
| 776.4749639                                      | 0.039732465                                        | 0.544841345                                       | 666.3409648                             |
| 293.1600011                                      | 0.062743515                                        | 0.471822154                                       | 305.2689335                             |
| 343.4360336                                      | 0.058535333                                        | 0.473955882                                       | 593.8667199                             |
| 245.4334111                                      | 0.061246735                                        | 0.419981067                                       | 451.8962823                             |
| 397.7588401                                      | 0.038373693                                        | 0.484677253                                       | 605.3618895                             |
| 26.00038142                                      | 0.222071324                                        | 0.485136563                                       | 68.40425532                             |
| 345.2845363                                      | 0.051370314                                        | 0.456970403                                       | 528.2577855                             |
| 347.0491937                                      | 0.060202537                                        | 0.482212344                                       | 512.5917215                             |
| 564.3319429                                      | 0.053296399                                        | 0.463309401                                       | 308.1007519                             |
| 196.4758209                                      | 0.079107819                                        | 0.425220099                                       | 231.7449541                             |
| 211.0415658                                      | 0.076565036                                        | 0.413651257                                       | 129.4728435                             |
| 1119.115025                                      | 0.045455094                                        | 0.498527671                                       | 657.5579985                             |
| 394.6190386                                      | 0.048412473                                        | 0.48173078                                        | 1253.46349                              |
| 577.7682603                                      | 0.057134564                                        | 0.429753583                                       | 608.5310734                             |
| 811.7340628                                      | 0.044157937                                        | 0.485332721                                       | 1073.069652                             |
| 801.4137273                                      | 0.038141078                                        | 0.539658648                                       | 998.9081578                             |
| 195.6437721                                      | 0.07343172                                         | 0.425797385                                       | 338.0831234                             |
| 135.9907247                                      | 0.070301769                                        | 0.433610822                                       | 134.4193548                             |
| 86.15991146                                      | 0.09703611                                         | 0.395012362                                       | 71.49723757                             |
| 860.9504647                                      | 0.044273015                                        | 0.483958874                                       | 1339.114203                             |

| wavelet.HHH_glszm_GrayLevelNonUniformity | wavelet.HHH_glszm_LargeAreaEmphasis | wavelet.HHH_glszm_ZoneVariance | wavelet.HHH_glszm_ZonePercentage | wavelet.HHH_glszm_LargeAreaLowGrayLevelEmphasis |
|------------------------------------------|-------------------------------------|--------------------------------|----------------------------------|-------------------------------------------------|
| 51.26498423                              | 5.69873817                          | 2.898130641                    | 0.597549482                      | 0.007789358                                     |
| 25.37525773                              | 10.22474227                         | 6.508194282                    | 0.518716578                      | 0.033843564                                     |
| 37.71012483                              | 20.96255201                         | 16.43586789                    | 0.470013038                      | 0.082052812                                     |
| 20.98611111                              | 140.1770833                         | 128.6689694                    | 0.294779939                      | 0.800654666                                     |
| 55.72586207                              | 20.46034483                         | 16.29311534                    | 0.489864865                      | 0.0220858                                       |
| 15.16666667                              | 4.714285714                         | 2.244897959                    | 0.636363636                      | 0.006459943                                     |
| 134.1835786                              | 70.77575523                         | 65.98572627                    | 0.456910281                      | 0.192827879                                     |
| 107.6683838                              | 679.4075982                         | 668.5893021                    | 0.30403289                       | 2.247646215                                     |
| 103.7785834                              | 41.15002789                         | 34.7216961                     | 0.39441267                       | 0.138596214                                     |
| 25.9895288                               | 41.38219895                         | 33.50697623                    | 0.356343284                      | 0.241961924                                     |
| 33.12228797                              | 105.8658777                         | 97.0190664                     | 0.336206897                      | 0.141623873                                     |
| 56.20625                                 | 27.27604167                         | 21.51104058                    | 0.4164859                        | 0.069351483                                     |
| 33.58064516                              | 936.0483871                         | 917.5425312                    | 0.23245849                       | 3.10218343                                      |
| 34.63193505                              | 39.43301759                         | 34.0347835                     | 0.430401864                      | 0.01570002                                      |
| 45.58774373                              | 82.90807799                         | 75.27263134                    | 0.361895161                      | 0.246394548                                     |
| 93.41186346                              | 47.69781757                         | 41.70121148                    | 0.408363803                      | 0.041308342                                     |
| 30.26590538                              | 8.153344209                         | 4.359428266                    | 0.513400335                      | 0.019371302                                     |
| 26.57342657                              | 467.0314685                         | 448.4451196                    | 0.231954582                      | 3.042253943                                     |
| 29.17744917                              | 23.84103512                         | 18.08458356                    | 0.416795069                      | 0.050509686                                     |
| 110.3372909                              | 105.7825148                         | 97.91044758                    | 0.356414695                      | 0.17673406                                      |
| 60.29583802                              | 384.4296963                         | 372.8589851                    | 0.293981481                      | 1.281034917                                     |
| 29.58354115                              | 36.25685786                         | 29.01659816                    | 0.371640408                      | 0.250093004                                     |
| 25.09328358                              | 10.39179104                         | 6.741980397                    | 0.5234375                        | 0.036727519                                     |
| 56.81288344                              | 30.68941718                         | 26.56889079                    | 0.49263317                       | 0.022055478                                     |
| 33.24601367                              | 56.48974943                         | 48.08107056                    | 0.344854674                      | 0.390970707                                     |
| 53.1663837                               | 28.27249576                         | 24.22823136                    | 0.497256226                      | 0.0311629                                       |
| 76.62038664                              | 9.198008202                         | 5.610900908                    | 0.527992577                      | 0.014590404                                     |
| 59.55989912                              | 277.3896595                         | 265.2585374                    | 0.287110789                      | 1.311483218                                     |
| 14.18803419                              | 7.978632479                         | 4.32952926                     | 0.523489933                      | 0.049174229                                     |
| 50.15004492                              | 9.078167116                         | 5.672434489                    | 0.541869523                      | 0.008080282                                     |
| 85.92917847                              | 636.7592068                         | 625.404407                     | 0.296763346                      | 1.245329921                                     |
| 39.89824561                              | 8.15877193                          | 4.864865343                    | 0.550990817                      | 0.006866594                                     |
| 65.89911728                              | 20.52269861                         | 16.37764909                    | 0.491173738                      | 0.052072359                                     |
| 57.61119516                              | 6.611195159                         | 3.451298976                    | 0.562553191                      | 0.014641202                                     |
| 102.3584366                              | 17.00571973                         | 12.59932243                    | 0.476385104                      | 0.027268901                                     |
| 55.4004914                               | 750.8046683                         | 557.2307847                    | 0.271423808                      | 1.520277346                                     |
| 70.37106918                              | 879.8375262                         | 864.6242556                    | 0.256382693                      | 2.924476717                                     |
| 97.53628319                              | 79.17566372                         | 73.96070542                    | 0.437899632                      | 0.073188728                                     |
| 31.25925926                              | 12.63973064                         | 8.351902867                    | 0.482926829                      | 0.022519931                                     |
| 157.6626578                              | 34.59771497                         | 29.81995495                    | 0.457496561                      | 0.00952736                                      |
| 52.28900256                              | 459.3324808                         | 448.3290926                    | 0.301464919                      | 1.689530097                                     |
| 94.71469534                              | 41.25949821                         | 33.57527575                    | 0.360744763                      | 0.178963728                                     |
| 82.08251473                              | 387.9459725                         | 375.0692959                    | 0.278675062                      | 1.432879344                                     |
| 54.15061058                              | 5.390773406                         | 2.541685921                    | 0.59244373                       | 0.007681442                                     |
| 24.8797654                               | 11.98533724                         | 8.473834934                    | 0.533646322                      | 0.021130949                                     |
| 61.44186047                              | 29.19588551                         | 23.16749898                    | 0.407285974                      | 0.055582435                                     |
| 88.62445835                              | 58.52094367                         | 53.69660743                    | 0.455282771                      | 0.023306812                                     |
| 19.49134948                              | 44.07958478                         | 34.99634822                    | 0.331802526                      | 0.190787253                                     |
| 23.11594203                              | 25.72463768                         | 19.64019324                    | 0.405405405                      | 0.115361912                                     |
| 29.2455243                               | 97.07928389                         | 85.12289951                    | 0.289201183                      | 0.411760332                                     |
| 52.3471668                               | 13.77414206                         | 9.57049673                     | 0.48773842                       | 0.022944079                                     |
| 84.72193075                              | 7.5                                 | 4.371964217                    | 0.565410857                      | 0.012140935                                     |
| 110.0193798                              | 90.42764858                         | 81.93200529                    | 0.343085106                      | 0.183045251                                     |
| 27.6937799                               | 42.5215311                          | 35.54586662                    | 0.378623188                      | 0.051800719                                     |
| 27.57142857                              | 35.54598826                         | 28.77173418                    | 0.384210526                      | 0.102844871                                     |
| 47.94983991                              | 14.01067236                         | 9.679653837                    | 0.480512821                      | 0.020330864                                     |
| 91.68708525                              | 25.50740174                         | 21.24388289                    | 0.484301607                      | 0.027037402                                     |
| 76.94871795                              | 11.50815851                         | 7.447322879                    | 0.496240602                      | 0.014589919                                     |
| 39.6171108                               | 38.50210379                         | 33.15971666                    | 0.432645631                      | 0.08811572                                      |
| 201.5377907                              | 71.65188953                         | 66.76123443                    | 0.452185343                      | 0.132677971                                     |
| 42.65565566                              | 6.408408408                         | 3.283405528                    | 0.565685164                      | 0.01498097                                      |
| 59.28888889                              | 44.72929293                         | 37.45564738                    | 0.370786517                      | 0.136071361                                     |
| 136.8903892                              | 29.09332804                         | 23.80771156                    | 0.434962861                      | 0.018330437                                     |
| 187.4358601                              | 7.903061224                         | 4.473006039                    | 0.539944904                      | 0.005429954                                     |
| 18.05454545                              | 431.8666667                         | 408.9428834                    | 0.208860759                      | 7.862296111                                     |
| 77.81545559                              | 45.95847751                         | 40.99796724                    | 0.448990161                      | 0.047758551                                     |
| 30.59475219                              | 8.705393959                         | 5.092214978                    | 0.52607362                       | 0.018684366                                     |
| 139.6965475                              | 10.73288916                         | 7.150226667                    | 0.52832                          | 0.002605059                                     |
| 143.5339074                              | 20.75457481                         | 16.33809235                    | 0.475840874                      | 0.020627782                                     |
| 72.24468085                              | 19.26595745                         | 14.41659122                    | 0.45410628                       | 0.031293513                                     |
| 28.6                                     | 27.27678571                         | 21.89604273                    | 0.431100847                      | 0.031353212                                     |
| 101.8504011                              | 14.70599339                         | 10.60723168                    | 0.493939394                      | 0.012433343                                     |
| 50.38511327                              | 507.4579288                         | 493.8587808                    | 0.271171566                      | 2.873979669                                     |
| 54.66439523                              | 9.539182283                         | 5.836672045                    | 0.519698982                      | 0.01620465                                      |
| 58.73248408                              | 160.0676752                         | 153.8534518                    | 0.401149792                      | 0.145515644                                     |
| 33.2996633                               | 19.71043771                         | 14.60618531                    | 0.442622951                      | 0.080376569                                     |
| 45.8069594                               | 21.3968517                          | 17.45628133                    | 0.50375626                       | 0.017709214                                     |
| 18.86363636                              | 176.3484848                         | 163.1803834                    | 0.275574113                      | 1.151993744                                     |
| 38.98848921                              | 37.11223022                         | 31.07972879                    | 0.407147042                      | 0.074955917                                     |
| 60.14044513                              | 7.583269378                         | 4.360927525                    | 0.557075673                      | 0.011345866                                     |
| 48.59280458                              | 5.309076043                         | 2.664131002                    | 0.61488185                       | 0.008629179                                     |
| 40.5950541                               | 133.8191654                         | 126.087843                     | 0.359644247                      | 0.352116111                                     |
| 73.34477255                              | 99.9896249                          | 93.18306456                    | 0.383297645                      | 0.218319886                                     |
| 65.90148699                              | 130.7388476                         | 122.5824089                    | 0.350146437                      | 0.393193341                                     |
| 47.92874299                              | 12.91353082                         | 9.100250577                    | 0.512095121                      | 0.035295535                                     |
| 31.31205674                              | 5395.914894                         | 5277.861275                    | 0.092036554                      | 183.5090658                                     |
| 59.38408304                              | 13.5975087                          | 9.34116794                     | 0.484696017                      | 0.032867672                                     |
| 63.99529633                              | 99.34901223                         | 92.6952323                     | 0.387673231                      | 0.219881252                                     |
| 35.44210526                              | 21.57593985                         | 16.72932105                    | 0.454234973                      | 0.030350638                                     |
| 43.11376147                              | 261.9357798                         | 248.1301237                    | 0.269135802                      | 0.973958122                                     |
| 23.96485623                              | 380.1469649                         | 362.7902908                    | 0.240030675                      | 1.275696374                                     |
| 59.95526914                              | 7.417740713                         | 4.156416887                    | 0.553736356                      | 0.005908753                                     |
| 125.9692544                              | 15.57071483                         | 11.60293256                    | 0.502025854                      | 0.033236942                                     |
| 80.90254237                              | 25.46751412                         | 20.03624437                    | 0.429090909                      | 0.034783383                                     |
| 97.63319765                              | 13.30348259                         | 9.429119769                    | 0.508042279                      | 0.013793487                                     |
| 70.5991356                               | 23.46623447                         | 20.04843032                    | 0.540911748                      | 0.024824864                                     |
| 58.30478589                              | 147.9382872                         | 135.5039841                    | 0.281860135                      | 0.5565672068                                    |
| 21.79354839                              | 163.1903226                         | 151.7833611                    | 0.29608405                       | 0.94773852                                      |
| 17.56353591                              | 289.7900552                         | 268.5588352                    | 0.217026379                      | 2.658831958                                     |
| 122.5034333                              | 23.65739068                         | 19.3029213                     | 0.47921718                       | 0.022431605                                     |

| wavelet.HHH_glszm_LargeAreaHighGrayLevelEmphasis | wavelet.HHH_glszm_HighGrayLevelZoneEmphasis | wavelet.HHH_glszm_SmallAreaEmphasis | wavelet.HHH_glszm_LowGrayLevelZoneEmphasis | wavelet.HHH_glszm_ZoneEntropy |
|--------------------------------------------------|---------------------------------------------|-------------------------------------|--------------------------------------------|-------------------------------|
| 5458.224763                                      | 994.4976341                                 | 0.754362968                         | 0.002570911                                | 6.172135344                   |
| 3939.123711                                      | 421.7175258                                 | 0.731189621                         | 0.008515462                                | 5.864130102                   |
| 6306.970874                                      | 342.5950069                                 | 0.701824311                         | 0.011455311                                | 6.033129166                   |
| 25153.76042                                      | 194.2430556                                 | 0.663374369                         | 0.013480782                                | 5.607769297                   |
| 20211.30345                                      | 1030.698276                                 | 0.735173958                         | 0.020275382                                | 6.137149976                   |
| 7033.761905                                      | 1589.014286                                 | 0.781232383                         | 0.003848097                                | 6.16260279                    |
| 27058.25639                                      | 404.0402789                                 | 0.698500601                         | 0.007156226                                | 6.143852693                   |
| 206546.2524                                      | 325.3915003                                 | 0.725044897                         | 0.005116515                                | 5.719433799                   |
| 12838.81874                                      | 327.7847183                                 | 0.689180605                         | 0.00666115                                 | 6.083637595                   |
| 7626.86911                                       | 197.7382199                                 | 0.687372182                         | 0.015115093                                | 5.677487372                   |
| 80686.21696                                      | 788.1676529                                 | 0.685764808                         | 0.003436944                                | 5.819875306                   |
| 11275.94167                                      | 446.203125                                  | 0.694758311                         | 0.004290867                                | 5.994584877                   |
| 284151.053                                       | 323.8364055                                 | 0.751795953                         | 0.006654517                                | 5.352039399                   |
| 109638.544                                       | 2850.571042                                 | 0.74265071                          | 0.001836901                                | 6.176791648                   |
| 28547.58217                                      | 367.9693593                                 | 0.718075659                         | 0.005053828                                | 5.753250065                   |
| 56602.95859                                      | 1216.787353                                 | 0.697890014                         | 0.001670095                                | 6.24594988                    |
| 4301.433931                                      | 544.4159869                                 | 0.691006437                         | 0.004703202                                | 6.108224215                   |
| 72737.35664                                      | 174.8006993                                 | 0.69589694                          | 0.012908627                                | 5.313447072                   |
| 12131.26063                                      | 532.077634                                  | 0.698852804                         | 0.004421201                                | 6.023528317                   |
| 64505.97356                                      | 624.9713977                                 | 0.708807923                         | 0.003664568                                | 6.024159273                   |
| 116254.8853                                      | 327.9876265                                 | 0.692678479                         | 0.00528408                                 | 5.813326405                   |
| 5662.57606                                       | 170.7356608                                 | 0.637830107                         | 0.012456873                                | 5.705641328                   |
| 4533.507463                                      | 454.6921642                                 | 0.699700263                         | 0.007868956                                | 6.066762111                   |
| 45758.7477                                       | 1533.72546                                  | 0.722309391                         | 0.001942256                                | 6.372637512                   |
| 8682.47836                                       | 178.4601367                                 | 0.701727305                         | 0.013652535                                | 5.523793518                   |
| 26951.69185                                      | 970.4473684                                 | 0.743325585                         | 0.002263438                                | 6.155088921                   |
| 6521.899238                                      | 757.9625073                                 | 0.71915619                          | 0.002375547                                | 6.226460834                   |
| 59542.16015                                      | 231.2307692                                 | 0.692477382                         | 0.009360738                                | 5.703435348                   |
| 1662.793916                                      | 224.8290598                                 | 0.700162594                         | 0.012155792                                | 5.621376775                   |
| 12094.1186                                       | 1375.814016                                 | 0.736514344                         | 0.00188242                                 | 6.187585684                   |
| 327146.0248                                      | 538.0127479                                 | 0.73280825                          | 0.004094726                                | 5.924012608                   |
| 12138.02982                                      | 1552.985088                                 | 0.730158246                         | 0.001811541                                | 6.516560506                   |
| 14529.43317                                      | 754.6380832                                 | 0.719812328                         | 0.003277729                                | 6.458015532                   |
| 3829.880484                                      | 594.8729198                                 | 0.716080913                         | 0.003796864                                | 6.226176417                   |
| 11235.93518                                      | 678.6911344                                 | 0.717780048                         | 0.002453838                                | 6.194335141                   |
| 215490.1695                                      | 402.1891892                                 | 0.709528859                         | 0.004655275                                | 5.751844633                   |
| 266435.2411                                      | 323.8427673                                 | 0.707412852                         | 0.0064385                                  | 5.745289646                   |
| 86679.6969                                       | 1180.936726                                 | 0.702957712                         | 0.001656807                                | 6.510573961                   |
| 8245.188552                                      | 679.6767677                                 | 0.699289134                         | 0.004190826                                | 5.985854665                   |
| 130356.4925                                      | 3823.187312                                 | 0.72260162                          | 0.000583666                                | 6.335367612                   |
| 126001.0217                                      | 289.7225064                                 | 0.71984433                          | 0.008100507                                | 5.727570876                   |
| 9948.625806                                      | 262.2379928                                 | 0.67607838                          | 0.006096996                                | 5.907597445                   |
| 105862.7466                                      | 282.5766208                                 | 0.680704887                         | 0.005574353                                | 5.677227986                   |
| 5089.337178                                      | 979.6506106                                 | 0.73980505                          | 0.002465516                                | 6.394645968                   |
| 9045.196481                                      | 837.9032258                                 | 0.732078234                         | 0.004893198                                | 6.413272815                   |
| 16323.81574                                      | 591.108229                                  | 0.686261049                         | 0.003689448                                | 6.22071922                    |
| 151049.3491                                      | 2610.885412                                 | 0.742600095                         | 0.000967646                                | 6.368268713                   |
| 10821.55363                                      | 262.283737                                  | 0.661254132                         | 0.009462558                                | 5.754505631                   |
| 6224.913043                                      | 258.1565217                                 | 0.703622055                         | 0.009391074                                | 5.58739073                    |
| 23548.44501                                      | 257.3248082                                 | 0.655779416                         | 0.008560744                                | 5.690716533                   |
| 10007.88827                                      | 756.1556265                                 | 0.714765647                         | 0.004029933                                | 6.427432973                   |
| 5293.219307                                      | 742.4160546                                 | 0.752067698                         | 0.002390105                                | 6.126633922                   |
| 45301.23514                                      | 523.5161499                                 | 0.688584796                         | 0.002878354                                | 5.78823222                    |
| 37261.20096                                      | 886.277512                                  | 0.704401875                         | 0.004076417                                | 5.764752206                   |
| 13291.62035                                      | 424.8454012                                 | 0.67288709                          | 0.007875095                                | 6.058339391                   |
| 10572.36286                                      | 770.3127001                                 | 0.69382845                          | 0.002688081                                | 6.100488342                   |
| 25657.44666                                      | 1034.324655                                 | 0.719512975                         | 0.00235516                                 | 6.251082894                   |
| 10212.71037                                      | 919.8566434                                 | 0.704719649                         | 0.002248451                                | 6.357270772                   |
| 17523.35203                                      | 494.7854137                                 | 0.711868968                         | 0.004364483                                | 5.926307103                   |
| 39314.79336                                      | 588.0104167                                 | 0.715015579                         | 0.002717361                                | 6.237016436                   |
| 3588.060666                                      | 608.8738739                                 | 0.737707722                         | 0.003933702                                | 6.151790829                   |
| 15258.64646                                      | 365.4252525                                 | 0.686634886                         | 0.005023508                                | 5.969582935                   |
| 47629.54647                                      | 1679.370929                                 | 0.694756623                         | 0.00106062                                 | 6.230919967                   |
| 12511.23129                                      | 1595.448251                                 | 0.72699672                          | 0.000974795                                | 6.25373042                    |
| 24515.22424                                      | 66.8666667                                  | 0.661481444                         | 0.039270521                                | 4.87496266                    |
| 45585.82526                                      | 1042.956171                                 | 0.718077475                         | 0.002079146                                | 6.340985849                   |
| 4926.826531                                      | 595.3498542                                 | 0.720468604                         | 0.00400101                                 | 6.166136523                   |
| 50621.63174                                      | 4741.256814                                 | 0.727444835                         | 0.000528751                                | 6.387126935                   |
| 22147.99318                                      | 1086.982777                                 | 0.734470133                         | 0.00191418                                 | 6.134934578                   |
| 12582.34119                                      | 676.0942249                                 | 0.698708076                         | 0.002599788                                | 6.081180664                   |
| 25641.71607                                      | 946.1964286                                 | 0.69229968                          | 0.003119837                                | 6.110469394                   |
| 18534.82728                                      | 1299.294479                                 | 0.713010974                         | 0.001399175                                | 6.232865785                   |
| 90480.1877                                       | 203.6860841                                 | 0.694645462                         | 0.01020527                                 | 5.544953267                   |
| 6855.300681                                      | 750.4327087                                 | 0.723607403                         | 0.003787657                                | 6.171208397                   |
| 177928.8185                                      | 1170.398885                                 | 0.713388962                         | 0.001850371                                | 6.259658708                   |
| 5281.250842                                      | 305.3501684                                 | 0.685483721                         | 0.007186031                                | 5.94892798                    |
| 28550.40845                                      | 1417.082022                                 | 0.741296384                         | 0.002171302                                | 6.430995271                   |
| 27806.57955                                      | 175.2840909                                 | 0.687960496                         | 0.020098549                                | 5.561532596                   |
| 19220.48345                                      | 528.705036                                  | 0.702190783                         | 0.004013998                                | 5.948186943                   |
| 5939.726017                                      | 788.1650038                                 | 0.725937344                         | 0.002443902                                | 6.120080277                   |
| 5077.916599                                      | 1003.530662                                 | 0.766461461                         | 0.003806815                                | 6.161614529                   |
| 51631.38794                                      | 406.9397218                                 | 0.713795175                         | 0.004984813                                | 5.767235422                   |
| 46670.33679                                      | 482.7988827                                 | 0.715786392                         | 0.004686054                                | 5.94787662                    |
| 44348.00279                                      | 363.66171                                   | 0.673850583                         | 0.005618749                                | 6.044328984                   |
| 7175.343475                                      | 548.5620496                                 | 0.723814542                         | 0.007227584                                | 6.434211876                   |
| 164153.3546                                      | 34.87234043                                 | 0.721784154                         | 0.06134279                                 | 3.998727496                   |
| 6344.482699                                      | 491.33391                                   | 0.703113409                         | 0.00440203                                 | 6.130291                      |
| 46019.73754                                      | 483.261524                                  | 0.72198593                          | 0.00581336                                 | 5.87920156                    |
| 16530.87519                                      | 793.5924812                                 | 0.707676622                         | 0.003135357                                | 6.013635292                   |
| 71165.6422                                       | 287.0330275                                 | 0.678106613                         | 0.006535191                                | 5.68459019                    |
| 114402.2907                                      | 318.8019169                                 | 0.667560342                         | 0.008166622                                | 5.617818724                   |
| 11264.56179                                      | 1523.115239                                 | 0.73981305                          | 0.001566267                                | 6.217739506                   |
| 7949.049962                                      | 540.3420406                                 | 0.721741045                         | 0.003622515                                | 6.149589989                   |
| 20666.17514                                      | 839.6765537                                 | 0.681796134                         | 0.002118708                                | 6.115646958                   |
| 13984.11036                                      | 1107.667571                                 | 0.724224821                         | 0.001823026                                | 6.308411311                   |
| 23542.92166                                      | 1047.994057                                 | 0.762512981                         | 0.00207052                                 | 6.333059016                   |
| 40261.02897                                      | 287.488665                                  | 0.678399666                         | 0.006241997                                | 5.780653571                   |
| 28933.25806                                      | 195.9419355                                 | 0.683797129                         | 0.012145556                                | 5.548176767                   |
| 32443.74586                                      | 126.0497238                                 | 0.651079098                         | 0.022315635                                | 5.279797679                   |
| 26634.17528                                      | 1181.582942                                 | 0.723280978                         | 0.00203249                                 | 6.364099338                   |

| wavelet.HHH_glszm_SmallAreaLowGrayLevelEmphasis | wavelet.HHH_ngtdm_Coarseness | wavelet.HHH_ngtdm_Complexity | wavelet.HHH_ngtdm_Strength | wavelet.HHH_ngtdm_Busyness | wavelet.HHH_ngtdm_Contrast |
|-------------------------------------------------|------------------------------|------------------------------|----------------------------|----------------------------|----------------------------|
| 0.002283871                                     | 0.003006355                  | 2.373951649                  | 2.424833152                | 0.174169027                | 7.86E-05                   |
| 0.007742411                                     | 0.006711374                  | 2.08118335                   | 2.949751737                | 0.167409362                | 0.000135355                |
| 0.010064637                                     | 0.00426832                   | 1.019894313                  | 1.526555023                | 0.309507932                | 7.81E-05                   |
| 0.011407055                                     | 0.007184193                  | 0.435416808                  | 1.108494079                | 0.360175781                | 7.23E-05                   |
| 0.001782156                                     | 0.002967838                  | 1.420020022                  | 2.29273038                 | 0.16673548                 | 4.00E-05                   |
| 0.003685043                                     | 0.010808692                  | 11.01909266                  | 11.07093424                | 0.03866796                 | 0.000347454                |
| 0.006127332                                     | 0.001176935                  | 0.317327688                  | 0.486092344                | 0.921621055                | 1.83E-05                   |
| 0.00411875                                      | 0.001384428                  | 0.192476403                  | 0.541028059                | 0.866792448                | 7.51E-06                   |
| 0.005471689                                     | 0.001564493                  | 0.305534827                  | 0.590208909                | 0.778512613                | 1.57E-05                   |
| 0.013167934                                     | 0.006063158                  | 0.531137225                  | 1.089371786                | 0.404101134                | 7.80E-05                   |
| 0.003008424                                     | 0.004548051                  | 0.684869475                  | 2.033280129                | 0.187645213                | 3.79E-05                   |
| 0.003488023                                     | 0.002915037                  | 0.678182974                  | 1.330454945                | 0.345616975                | 3.00E-05                   |
| 0.005776638                                     | 0.003845391                  | 0.298460594                  | 1.167089981                | 0.364753629                | 1.69E-05                   |
| 0.001742132                                     | 0.004348542                  | 4.456017743                  | 11.2518993                 | 0.043985103                | 4.65E-05                   |
| 0.004075258                                     | 0.003426435                  | 0.46934723                   | 0.975350431                | 0.405842906                | 3.52E-05                   |
| 0.001399632                                     | 0.001596633                  | 0.82026227                   | 1.773804256                | 0.248121723                | 1.33E-05                   |
| 0.004008261                                     | 0.005248684                  | 1.733146042                  | 2.211966347                | 0.191011242                | 0.000127231                |
| 0.010744716                                     | 0.005224332                  | 0.325877061                  | 1.060423406                | 0.461966007                | 2.82E-05                   |
| 0.003755505                                     | 0.005339398                  | 1.146328219                  | 2.071570182                | 0.183276399                | 7.11E-05                   |
| 0.003143662                                     | 0.001324121                  | 0.382845905                  | 0.93390706                 | 0.495646354                | 7.88E-06                   |
| 0.004115065                                     | 0.002318417                  | 0.261377589                  | 0.721400009                | 0.590758686                | 1.49E-05                   |
| 0.00942179                                      | 0.005834738                  | 0.434304661                  | 0.851876963                | 0.524832648                | 8.50E-05                   |
| 0.005560558                                     | 0.00602981                   | 2.389357258                  | 2.569999326                | 0.17504703                 | 0.000165                   |
| 0.001734358                                     | 0.002636728                  | 2.975852034                  | 4.675227625                | 0.102067127                | 3.32E-05                   |
| 0.01133955                                      | 0.004891056                  | 0.380270364                  | 0.853315064                | 0.54623393                 | 5.01E-05                   |
| 0.001954841                                     | 0.003017859                  | 1.731567687                  | 2.593917441                | 0.152461517                | 4.13E-05                   |
| 0.001927319                                     | 0.002                        | 1.056212824                  | 1.265454707                | 0.329462573                | 3.85E-05                   |
| 0.007714876                                     | 0.002404665                  | 0.244077597                  | 0.700397132                | 0.174088363                | 1.48E-05                   |
| 0.010508981                                     | 0.013474771                  | 1.740658616                  | 2.380254065                | 0.188899995                | 0.000358762                |
| 0.001673971                                     | 0.003320991                  | 2.649129519                  | 3.824561944                | 0.103855333                | 4.94E-05                   |
| 0.003517749                                     | 0.00153403                   | 0.371148659                  | 1.155008023                | 0.448801869                | 6.89E-06                   |
| 0.001599414                                     | 0.003390992                  | 3.573758837                  | 3.707720599                | 0.10093867                 | 8.82E-05                   |
| 0.002718864                                     | 0.002094628                  | 1.793778061                  | 2.25602481                 | 0.232140826                | 3.66E-05                   |
| 0.003116109                                     | 0.002586098                  | 1.78699832                   | 1.842194834                | 0.281794814                | 6.66E-05                   |
| 0.001970689                                     | 0.001609949                  | 0.665628268                  | 1.04005446                 | 0.397327181                | 1.92E-05                   |
| 0.003846037                                     | 0.002315542                  | 0.316801947                  | 1.003858675                | 0.459194856                | 1.15E-05                   |
| 0.005421743                                     | 0.001876321                  | 0.197488931                  | 0.649531039                | 0.703194799                | 9.52E-06                   |
| 0.001032916                                     | 0.001380696                  | 1.040828971                  | 1.605019432                | 0.262549171                | 1.67E-05                   |
| 0.003705206                                     | 0.004938724                  | 2.218484322                  | 3.376150824                | 0.14762813                 | 7.74E-05                   |
| 0.000509062                                     | 0.000953791                  | 1.066079532                  | 2.439256848                | 1.170590186                | 7.17E-06                   |
| 0.00695561                                      | 0.002765954                  | 0.358150984                  | 0.960501544                | 0.484033273                | 1.69E-05                   |
| 0.00453192                                      | 0.001662225                  | 0.198860267                  | 0.40339117                 | 1.094721068                | 1.72E-05                   |
| 0.00429045                                      | 0.001819962                  | 0.175811516                  | 0.519738234                | 0.846610524                | 9.74E-06                   |
| 0.002103437                                     | 0.002598094                  | 2.752868121                  | 2.53789726                 | 0.180167827                | 7.24E-05                   |
| 0.004354228                                     | 0.004869422                  | 4.584844425                  | 4.040876765                | 0.112461135                | 0.000180357                |
| 0.003016994                                     | 0.002308851                  | 0.922732679                  | 1.686088039                | 0.291666574                | 2.55E-05                   |
| 0.000864878                                     | 0.001604119                  | 2.414244367                  | 5.092672618                | 0.101209038                | 1.15E-05                   |
| 0.007850499                                     | 0.007347039                  | 0.886977988                  | 1.966987572                | 0.242855088                | 7.57E-05                   |
| 0.007970582                                     | 0.007828819                  | 0.880856611                  | 1.793066998                | 0.25019665                 | 0.000108136                |
| 0.006935774                                     | 0.00493851                   | 0.384670551                  | 1.079662806                | 0.398004788                | 3.77E-05                   |
| 0.003461797                                     | 0.002472093                  | 1.691882309                  | 1.815701907                | 0.23629039                 | 6.41E-05                   |
| 0.001986897                                     | 0.001853863                  | 1.076993528                  | 1.144580122                | 0.362158027                | 4.14E-05                   |
| 0.00222643                                      | 0.001437856                  | 0.205165154                  | 0.525404061                | 0.76485741                 | 1.11E-05                   |
| 0.003725865                                     | 0.005732289                  | 1.520966838                  | 3.917033052                | 0.118242698                | 6.21E-05                   |
| 0.006920414                                     | 0.005255839                  | 1.199618847                  | 2.465166954                | 0.193566575                | 5.59E-05                   |
| 0.002239923                                     | 0.003269386                  | 1.262000745                  | 1.900956144                | 0.209173769                | 4.90E-05                   |
| 0.002045909                                     | 0.001720857                  | 0.999336825                  | 1.611101326                | 0.265580519                | 2.10E-05                   |
| 0.001860114                                     | 0.001825923                  | 1.273730218                  | 1.6626456                  | 0.175600114                | 3.10E-05                   |
| 0.003615721                                     | 0.00406235                   | 1.10286309                   | 1.895111773                | 0.224015335                | 4.78E-05                   |
| 0.002135422                                     | 0.000809831                  | 0.312446747                  | 0.511978961                | 0.840772762                | 8.32E-06                   |
| 0.003279842                                     | 0.003486457                  | 1.781452598                  | 1.807038058                | 0.246840917                | 0.000101687                |
| 0.004004754                                     | 0.002593095                  | 0.373107697                  | 0.760075487                | 0.516043646                | 2.75E-05                   |
| 0.000869246                                     | 0.001131172                  | 0.696350468                  | 1.516598539                | 0.281497998                | 8.81E-06                   |
| 0.000793706                                     | 0.000846001                  | 0.67824288                   | 0.973979476                | 0.410710395                | 1.15E-05                   |
| 0.029383199                                     | 0.008089595                  | 0.142461052                  | 0.481162017                | 0.932974501                | 6.23E-05                   |
| 0.001774561                                     | 0.001890005                  | 1.312500588                  | 2.287419178                | 0.204425653                | 1.78E-05                   |
| 0.003385825                                     | 0.004864368                  | 2.159873439                  | 2.456950819                | 0.177355986                | 0.000120847                |
| 0.000469257                                     | 0.001060607                  | 1.232303815                  | 2.116523159                | 0.167092278                | 1.55E-05                   |
| 0.001652053                                     | 0.001180838                  | 0.717722567                  | 1.444615356                | 0.331651541                | 9.10E-06                   |
| 0.002109198                                     | 0.002272327                  | 0.612480251                  | 1.090788305                | 0.363682011                | 3.03E-05                   |
| 0.002778818                                     | 0.005251443                  | 1.926896519                  | 3.529111987                | 0.109528555                | 6.77E-05                   |
| 0.001164685                                     | 0.001489711                  | 1.07089157                   | 1.58871598                 | 0.25991964                 | 1.80E-05                   |
| 0.008195574                                     | 0.003020046                  | 0.269185043                  | 0.821852929                | 0.821175888                | 1.62E-05                   |
| 0.003371664                                     | 0.002791078                  | 1.461589708                  | 1.976254231                | 0.230864316                | 5.06E-05                   |
| 0.001567466                                     | 0.002199872                  | 1.170508464                  | 2.037284779                | 0.188571956                | 2.60E-05                   |
| 0.005695711                                     | 0.004771581                  | 1.142721336                  | 1.991530478                | 0.283589253                | 6.76E-05                   |
| 0.001954595                                     | 0.003140056                  | 3.0154469                    | 4.659528621                | 0.097372186                | 4.63E-05                   |
| 0.017839168                                     | 0.007115625                  | 0.498628186                  | 1.399139885                | 0.336891469                | 5.60E-05                   |
| 0.00331675                                      | 0.004044645                  | 0.848145517                  | 1.667504705                | 0.236171568                | 4.35E-05                   |
| 0.002015678                                     | 0.00265161                   | 1.427349829                  | 1.680072145                | 0.249516155                | 5.92E-05                   |
| 0.003532057                                     | 0.003219091                  | 3.054979442                  | 3.029429356                | 0.146025873                | 8.27E-05                   |
| 0.004135699                                     | 0.003978009                  | 0.533125529                  | 1.220312026                | 0.310088142                | 3.70E-05                   |
| 0.003998643                                     | 0.002239426                  | 0.524949736                  | 1.190125413                | 0.370965419                | 1.73E-05                   |
| 0.004350151                                     | 0.00221782                   | 0.403754932                  | 0.837874516                | 0.529236888                | 2.07E-05                   |
| 0.005551177                                     | 0.002472615                  | 1.504561845                  | 1.32392206                 | 0.54777545                 | 0.000104425                |
| 0.042764785                                     | 0.003535299                  | 0.021846794                  | 0.15534516                 | 3.59269575                 | 9.85E-06                   |
| 0.003671403                                     | 0.002612774                  | 1.03180837                   | 1.416660071                | 0.332564467                | 4.16E-05                   |
| 0.005127036                                     | 0.002633438                  | 0.610612219                  | 1.412375864                | 0.328806321                | 2.15E-05                   |
| 0.002727685                                     | 0.004732301                  | 1.631748103                  | 2.923479657                | 0.132458078                | 5.55E-05                   |
| 0.005224252                                     | 0.003377444                  | 0.305660196                  | 0.957536783                | 0.45307555                 | 1.78E-05                   |
| 0.007004198                                     | 0.005290704                  | 0.481561408                  | 1.730172014                | 0.269944403                | 2.72E-05                   |
| 0.001374672                                     | 0.002664354                  | 2.685711951                  | 3.67732948                 | 0.121307226                | 4.20E-05                   |
| 0.003002009                                     | 0.001257446                  | 0.570451086                  | 0.780261472                | 0.611211051                | 1.86E-05                   |
| 0.001171829                                     | 0.002057824                  | 0.5229228                    | 1.057058887                | 0.361068589                | 2.48E-05                   |
| 0.001538764                                     | 0.001587443                  | 1.270812803                  | 1.911644793                | 0.243854183                | 1.99E-05                   |
| 0.001800667                                     | 0.002084                     | 1.679855575                  | 2.001104744                | 0.209430107                | 3.97E-05                   |
| 0.00491855                                      | 0.002338887                  | 0.31280981                   | 0.960438761                | 0.554320682                | 1.13E-05                   |
| 0.009860093                                     | 0.006557393                  | 0.525212773                  | 1.332353349                | 0.36561636                 | 6.43E-05                   |
| 0.01853438                                      | 0.007642427                  | 0.245156281                  | 0.797542242                | 0.564013732                | 5.76E-05                   |
| 0.001767173                                     | 0.001227354                  | 1.02971744                   | 1.750854801                | 0.273370453                | 1.20E-05                   |

| wavelet.HHL_gldm_GrayLevelVariance | wavelet.HHL_gldm_HighGrayLevelEmphasis | wavelet.HHL_gldm_GrayLevelNonUniformityNormalized | wavelet.HHL_gldm_DependenceEntropy | wavelet.HHL_gldm_DependenceNonUniformity |
|------------------------------------|----------------------------------------|---------------------------------------------------|------------------------------------|------------------------------------------|
| 51.65097569                        | 867.2082941                            | 0.045084439                                       | 6.532334021                        | 658.8520264                              |
| 23.34818153                        | 531.2117647                            | 0.072350939                                       | 6.074355111                        | 222.5016043                              |
| 19.65225935                        | 290.0338983                            | 0.076761592                                       | 6.191337182                        | 329.5423729                              |
| 23.49527778                        | 442.2149437                            | 0.072732206                                       | 6.31514385                         | 204.3019447                              |
| 10.63279948                        | 194.9294764                            | 0.091142742                                       | 5.96281017                         | 472.5988176                              |
| 19.8885552                         | 222.3469697                            | 0.069995409                                       | 5.900554377                        | 174.8181818                              |
| 26.64811214                        | 682.8364891                            | 0.064946825                                       | 6.474107484                        | 1311.28349                               |
| 18.67027304                        | 566.7049726                            | 0.088158731                                       | 6.2523211                          | 961.1307753                              |
| 11.98605698                        | 559.9538055                            | 0.096278565                                       | 6.073721726                        | 828.9828421                              |
| 34.4388775                         | 459.6371269                            | 0.060554272                                       | 6.212467161                        | 294.4011194                              |
| 15.76920746                        | 228.0046419                            | 0.083067143                                       | 6.108602161                        | 314.7904509                              |
| 24.70706161                        | 771.786551                             | 0.069018497                                       | 6.235900491                        | 550.3969631                              |
| 13.4146351                         | 569.6871987                            | 0.12496439                                        | 6.112707285                        | 250.8596679                              |
| 16.37071405                        | 357.8561444                            | 0.085333584                                       | 6.116891314                        | 347.0757135                              |
| 33.236273                          | 781.7716734                            | 0.060810069                                       | 6.338907667                        | 509.875                                  |
| 24.43702959                        | 519.6622486                            | 0.068025402                                       | 6.392311568                        | 989.4657221                              |
| 31.25453412                        | 586.421273                             | 0.056627358                                       | 6.258858068                        | 330.7169179                              |
| 11.62587376                        | 470.0997567                            | 0.114709111                                       | 5.989853572                        | 196.3998378                              |
| 7.607530015                        | 138.9730354                            | 0.106645046                                       | 5.775820315                        | 239.8243451                              |
| 38.18662029                        | 1087.976534                            | 0.062835149                                       | 6.466369537                        | 1260.366801                              |
| 5.430995488                        | 161.3091931                            | 0.147048261                                       | 5.938979271                        | 373.1600529                              |
| 15.61357657                        | 255.0741427                            | 0.08384776                                        | 6.045520502                        | 234.8776645                              |
| 35.77402401                        | 539.4345703                            | 0.052047729                                       | 6.327704874                        | 299.0390625                              |
| 17.45497829                        | 327.8243294                            | 0.076851584                                       | 6.183590169                        | 588.4242539                              |
| 34.53621626                        | 568.607227                             | 0.062045789                                       | 6.323661935                        | 307.3142184                              |
| 17.72841442                        | 526.5365133                            | 0.083875177                                       | 6.127499377                        | 502.450401                               |
| 26.2541826                         | 405.4253016                            | 0.062295159                                       | 6.399775705                        | 792.1221775                              |
| 19.7909968                         | 398.6020999                            | 0.080916871                                       | 6.235583951                        | 562.2903693                              |
| 20.29338018                        | 439.0313199                            | 0.07389557                                        | 5.857431607                        | 116.6196868                              |
| 17.97771584                        | 321.8807205                            | 0.080248576                                       | 6.129007107                        | 442.4576436                              |
| 10.41772544                        | 285.6233712                            | 0.112317548                                       | 6.074298286                        | 734.3177806                              |
| 33.8486699                         | 591.4156597                            | 0.056660253                                       | 6.451562228                        | 531.7114548                              |
| 27.76699489                        | 584.8234748                            | 0.063378961                                       | 6.378547561                        | 782.088882                               |
| 38.72636378                        | 540.0289362                            | 0.050782073                                       | 6.59774667                         | 623.6944681                              |
| 14.41348753                        | 286.6485014                            | 0.084565596                                       | 6.107440664                        | 908.1680291                              |
| 16.1110816                         | 431.4878293                            | 0.09585934                                        | 6.154066101                        | 537.4434812                              |
| 23.26409439                        | 1147.270357                            | 0.086608896                                       | 6.334410657                        | 684.464666                               |
| 34.68679195                        | 1089.19318                             | 0.067279033                                       | 6.697865179                        | 1071.944778                              |
| 23.54015203                        | 330.8439024                            | 0.065420054                                       | 6.049879678                        | 335.6894309                              |
| 26.32174802                        | 836.6363136                            | 0.061769666                                       | 6.355943196                        | 1853.686107                              |
| 9.16733013                         | 219.037394                             | 0.117179851                                       | 6.061551683                        | 388.1071704                              |
| 25.9941926                         | 485.5515904                            | 0.059986736                                       | 6.31359007                         | 1044.071115                              |
| 15.29381271                        | 437.0547495                            | 0.09108841                                        | 6.145040043                        | 698.9282781                              |
| 36.22340805                        | 456.1438907                            | 0.050995583                                       | 6.347026772                        | 767.0426045                              |
| 27.71962072                        | 415.3904538                            | 0.061362262                                       | 6.265578225                        | 331.1830986                              |
| 22.3286431                         | 533.8958106                            | 0.067428443                                       | 6.23848967                         | 674.6043716                              |
| 13.86275916                        | 566.648619                             | 0.091576796                                       | 6.169274947                        | 843.2354231                              |
| 30.79443637                        | 904.9437428                            | 0.080627069                                       | 6.105394454                        | 185.2319173                              |
| 22.24680717                        | 398.132785                             | 0.074008459                                       | 6.049621824                        | 209.5851939                              |
| 16.30156015                        | 291.9548817                            | 0.092195214                                       | 6.122047731                        | 259.7884615                              |
| 30.95553218                        | 500.506812                             | 0.060558405                                       | 6.318428277                        | 690.8318412                              |
| 29.78331452                        | 540.8973598                            | 0.056634225                                       | 6.315963168                        | 956.3408484                              |
| 20.71468676                        | 479.3882979                            | 0.071853996                                       | 6.238716142                        | 1040.067819                              |
| 7.184742406                        | 163.5932971                            | 0.119578345                                       | 5.78330525                         | 178.1431159                              |
| 23.27997569                        | 598.2338346                            | 0.087132116                                       | 6.143477574                        | 257.3428571                              |
| 23.23005917                        | 586.7446154                            | 0.070137541                                       | 6.258345383                        | 448.7025641                              |
| 26.84197854                        | 676.1278121                            | 0.061581681                                       | 6.348565687                        | 1033.970581                              |
| 37.85066481                        | 1082.703008                            | 0.053755869                                       | 6.558393996                        | 898.2001157                              |
| 13.89205767                        | 400.6777913                            | 0.089893348                                       | 6.096190191                        | 312.2633495                              |
| 14.12030614                        | 516.7905576                            | 0.088816867                                       | 6.29344675                         | 1737.700843                              |
| 35.85750633                        | 583.48641                              | 0.050751005                                       | 6.327426603                        | 535.9309173                              |
| 39.32594496                        | 1588.234831                            | 0.059264122                                       | 6.439343564                        | 685.3430712                              |
| 25.89812262                        | 777.3057523                            | 0.070930832                                       | 6.369081423                        | 1311.462256                              |
| 25.81893948                        | 534.5956972                            | 0.061300896                                       | 6.308520159                        | 2014.134199                              |
| 10.8029883                         | 222.1556962                            | 0.109392726                                       | 5.881670289                        | 131.7670886                              |
| 14.00206047                        | 431.655101                             | 0.094122954                                       | 6.16672114                         | 703.503884                               |
| 30.27384358                        | 489.8895706                            | 0.062992821                                       | 6.28836206                         | 327.4754601                              |
| 37.22217628                        | 741.10128                              | 0.052233933                                       | 6.475720093                        | 1771.66592                               |
| 13.71128707                        | 431.2740311                            | 0.086986647                                       | 6.046323937                        | 1293.239713                              |
| 19.17608012                        | 522.278813                             | 0.076457146                                       | 6.171671393                        | 654.1897861                              |
| 14.93655746                        | 434.7290223                            | 0.08765492                                        | 6.116839092                        | 258.2655889                              |
| 38.48372939                        | 958.2554779                            | 0.057331138                                       | 6.56865948                         | 1075.379487                              |
| 27.33021169                        | 633.0430013                            | 0.079379981                                       | 6.412572024                        | 448.8016674                              |
| 30.2926726                         | 678.0053121                            | 0.058527192                                       | 6.350838228                        | 602.9734396                              |
| 27.04390268                        | 491.7623762                            | 0.06285289                                        | 6.387749582                        | 769.3085276                              |
| 20.02820323                        | 258.6639344                            | 0.06763822                                        | 6.099729638                        | 341.95231                                |
| 30.27845014                        | 897.1581803                            | 0.069270989                                       | 6.368109256                        | 554.8372287                              |
| 16.82078181                        | 612.8329854                            | 0.093579613                                       | 6.058095283                        | 173.6346555                              |
| 10.01677987                        | 192.0533099                            | 0.101725587                                       | 5.856909962                        | 331.5483304                              |
| 35.12408569                        | 586.1791364                            | 0.052630078                                       | 6.37028972                         | 698.5545105                              |
| 52.0156249                         | 753.7727501                            | 0.044743576                                       | 6.506430794                        | 638.9074912                              |
| 13.68523245                        | 253.8404669                            | 0.093540634                                       | 6.072129731                        | 333.9249583                              |
| 10.73006686                        | 193.3643316                            | 0.108204748                                       | 6.063347973                        | 549.8761089                              |
| 6.776402474                        | 162.7539863                            | 0.11956451                                        | 5.869785383                        | 502.9850309                              |
| 28.34047823                        | 543.1410414                            | 0.058373052                                       | 6.396328525                        | 622.1422714                              |
| 7.616530125                        | 190.3426893                            | 0.144485953                                       | 5.950548411                        | 186.8159269                              |
| 21.62942746                        | 441.6645702                            | 0.071345103                                       | 6.210931633                        | 564.7542977                              |
| 15.34049906                        | 552.9985412                            | 0.096683356                                       | 6.214172189                        | 470.5025229                              |
| 11.12248611                        | 217.9398907                            | 0.100528345                                       | 5.930401906                        | 276.5519126                              |
| 22.38774431                        | 438.668642                             | 0.078547295                                       | 6.333140822                        | 412.6118519                              |
| 10.38299099                        | 281.1671779                            | 0.117360693                                       | 5.884923714                        | 209.5214724                              |
| 33.76600903                        | 1098.547019                            | 0.05694507                                        | 6.332821213                        | 682.7489505                              |
| 28.14705037                        | 675.109782                             | 0.059777403                                       | 6.345640679                        | 1392.393402                              |
| 22.05704316                        | 775.4763636                            | 0.070368228                                       | 6.261135562                        | 769.830303                               |
| 18.11798645                        | 670.8782169                            | 0.07789163                                        | 6.167749015                        | 967.2591912                              |
| 31.88749082                        | 676.7387493                            | 0.059272162                                       | 6.412301406                        | 896.3571011                              |
| 16.17959901                        | 475.8306709                            | 0.084805738                                       | 6.159163179                        | 567.8136315                              |
| 19.18458433                        | 440.982808                             | 0.094763863                                       | 6.219004933                        | 187.17383                                |
| 17.4752457                         | 438.2661871                            | 0.097329331                                       | 6.062056029                        | 141.7242206                              |
| 22.2111081                         | 580.6811569                            | 0.073731018                                       | 6.355248733                        | 1239.502251                              |

| wavelet.HHL_gldm_GrayLevelNonUniformity | wavelet.HHL_gldm_SmallDependenceEmphasis | wavelet.HHL_gldm_DependenceNonUniformityNormalized | wavelet.HHL_gldm_DependenceVariance |
|-----------------------------------------|------------------------------------------|----------------------------------------------------|-------------------------------------|
| 95.66918002                             | 0.535238953                              | 0.310486346                                        | 1.304202373                         |
| 67.64812834                             | 0.425540508                              | 0.23796963                                         | 2.243946352                         |
| 117.7522816                             | 0.387047069                              | 0.214825536                                        | 3.401945302                         |
| 71.0593654                              | 0.388004661                              | 0.209111509                                        | 3.165070941                         |
| 215.8260135                             | 0.338072047                              | 0.199577203                                        | 2.586419718                         |
| 46.1969697                              | 0.451543286                              | 0.264876033                                        | 1.733709826                         |
| 367.0145107                             | 0.424445803                              | 0.232044504                                        | 2.812328855                         |
| 450.3148003                             | 0.35144109                               | 0.188161859                                        | 3.487366233                         |
| 437.6823581                             | 0.329444076                              | 0.182354343                                        | 3.495239454                         |
| 64.9141791                              | 0.486815397                              | 0.27462791                                         | 1.646549204                         |
| 125.265252                              | 0.384363377                              | 0.208746983                                        | 2.554946563                         |
| 159.0876356                             | 0.439430873                              | 0.238783932                                        | 2.182788524                         |
| 233.3085163                             | 0.278247881                              | 0.134365114                                        | 6.912632194                         |
| 146.5177635                             | 0.345613886                              | 0.202140777                                        | 2.599686102                         |
| 120.6471774                             | 0.458386458                              | 0.256993448                                        | 2.010564354                         |
| 297.679159                              | 0.409900813                              | 0.226111911                                        | 2.484071126                         |
| 67.61306533                             | 0.469667508                              | 0.276982343                                        | 1.404911212                         |
| 141.4363341                             | 0.285949538                              | 0.159286162                                        | 4.383932266                         |
| 138.4252696                             | 0.306645908                              | 0.184764519                                        | 2.813537955                         |
| 326.6799384                             | 0.442482673                              | 0.242424851                                        | 2.165036028                         |
| 444.6739418                             | 0.220063071                              | 0.123399488                                        | 7.311332969                         |
| 90.47173309                             | 0.398517975                              | 0.217680875                                        | 3.072265966                         |
| 53.296875                               | 0.489503505                              | 0.292030334                                        | 1.325927734                         |
| 203.4261428                             | 0.40040927                               | 0.222298547                                        | 2.590141679                         |
| 78.98428908                             | 0.434877166                              | 0.241409441                                        | 2.138159823                         |
| 198.7002955                             | 0.385607743                              | 0.21209388                                         | 2.917387081                         |
| 201.4002474                             | 0.437103785                              | 0.245011499                                        | 2.234153304                         |
| 223.4923968                             | 0.372230957                              | 0.203580872                                        | 3.126889654                         |
| 33.03131991                             | 0.445405462                              | 0.260894154                                        | 1.414620963                         |
| 164.8305745                             | 0.388045247                              | 0.215412679                                        | 2.531074807                         |
| 534.4068937                             | 0.28548094                               | 0.154333287                                        | 4.756039296                         |
| 117.2300628                             | 0.461478731                              | 0.256989587                                        | 2.027160124                         |
| 204.6506658                             | 0.437247615                              | 0.242207768                                        | 2.095626686                         |
| 119.3378723                             | 0.484888438                              | 0.265401901                                        | 2.187704844                         |
| 372.4268847                             | 0.375004698                              | 0.206214357                                        | 2.817745984                         |
| 287.4821607                             | 0.338128516                              | 0.179207563                                        | 3.849244847                         |
| 322.2717012                             | 0.361907699                              | 0.183946428                                        | 4.091349886                         |
| 347.2270878                             | 0.406793261                              | 0.207700984                                        | 5.294353891                         |
| 80.46666667                             | 0.4610324                                | 0.272918236                                        | 1.387110847                         |
| 449.0654746                             | 0.453033928                              | 0.254977456                                        | 1.990854693                         |
| 303.9645335                             | 0.282568989                              | 0.149617259                                        | 5.518175803                         |
| 231.9687096                             | 0.478767639                              | 0.269995116                                        | 1.786032597                         |
| 332.7459622                             | 0.345216403                              | 0.191329942                                        | 3.984209267                         |
| 126.8770096                             | 0.528489364                              | 0.308296867                                        | 1.286095445                         |
| 78.42097027                             | 0.450717492                              | 0.259141705                                        | 1.769208539                         |
| 185.0910747                             | 0.441232909                              | 0.245757512                                        | 1.984740064                         |
| 417.773345                              | 0.34080859                               | 0.184838979                                        | 3.505294005                         |
| 70.22617681                             | 0.393703416                              | 0.212665806                                        | 2.492491178                         |
| 62.98119859                             | 0.417900553                              | 0.246281074                                        | 2.067577924                         |
| 124.647929                              | 0.369343949                              | 0.192151229                                        | 3.665617013                         |
| 155.5745426                             | 0.47915384                               | 0.268910798                                        | 1.784558562                         |
| 190.9139721                             | 0.493642693                              | 0.283696484                                        | 1.544019562                         |
| 324.2052305                             | 0.410793729                              | 0.230511485                                        | 2.162740179                         |
| 132.0144928                             | 0.273052774                              | 0.161361518                                        | 3.82448212                          |
| 115.8857143                             | 0.36474093                               | 0.19349087                                         | 3.314695008                         |
| 136.7682051                             | 0.415813694                              | 0.230103879                                        | 2.217845102                         |
| 249.0978986                             | 0.449346652                              | 0.255616955                                        | 2.025617856                         |
| 185.8877964                             | 0.459322077                              | 0.259745551                                        | 2.070888504                         |
| 148.1541262                             | 0.348113588                              | 0.189480188                                        | 3.317818303                         |
| 810.8091795                             | 0.352824139                              | 0.190349528                                        | 4.642706041                         |
| 89.62627407                             | 0.510240057                              | 0.303471641                                        | 1.24893387                          |
| 158.235206                              | 0.45663766                               | 0.256682798                                        | 2.029901387                         |
| 410.618587                              | 0.422271605                              | 0.226543834                                        | 2.628116518                         |
| 467.2967336                             | 0.459299974                              | 0.264218051                                        | 1.695481867                         |
| 86.42025316                             | 0.315376199                              | 0.166793783                                        | 4.182541259                         |
| 363.5028483                             | 0.335171637                              | 0.182160509                                        | 3.723741747                         |
| 82.14263804                             | 0.4499198                                | 0.251131488                                        | 1.933613892                         |
| 326.46208                               | 0.494545743                              | 0.283466547                                        | 1.55722281                          |
| 509.4807922                             | 0.393608902                              | 0.22080241                                         | 2.520138131                         |
| 221.5728088                             | 0.390196852                              | 0.225738366                                        | 2.36507746                          |
| 113.8637413                             | 0.361573255                              | 0.198818775                                        | 3.276412661                         |
| 245.9505828                             | 0.449531021                              | 0.250671209                                        | 2.143562358                         |
| 180.9069767                             | 0.387004293                              | 0.196929209                                        | 3.86541752                          |
| 132.2129261                             | 0.467741692                              | 0.266920513                                        | 1.660917003                         |
| 196.7923986                             | 0.436431201                              | 0.245706971                                        | 2.173847395                         |
| 90.7704918                              | 0.435149642                              | 0.254807981                                        | 1.724574172                         |
| 165.9732888                             | 0.428479315                              | 0.231568126                                        | 2.594734965                         |
| 89.64926931                             | 0.339271839                              | 0.181247031                                        | 3.84648341                          |
| 173.645577                              | 0.338074005                              | 0.194228665                                        | 2.962582481                         |
| 123.1017529                             | 0.509555256                              | 0.298655199                                        | 1.525652079                         |
| 88.99497235                             | 0.551237697                              | 0.321220458                                        | 1.260106048                         |
| 168.2795998                             | 0.331778859                              | 0.185616986                                        | 3.637575195                         |
| 353.7213215                             | 0.317790783                              | 0.168209272                                        | 5.032581999                         |
| 367.4217377                             | 0.261772083                              | 0.163678826                                        | 3.989450119                         |
| 142.3718737                             | 0.454288859                              | 0.255080882                                        | 1.834590662                         |
| 221.3524804                             | 0.230427546                              | 0.121942511                                        | 7.918223248                         |
| 170.1580713                             | 0.428845082                              | 0.236794255                                        | 2.118921808                         |
| 265.1057622                             | 0.333677873                              | 0.171591011                                        | 4.340200602                         |
| 147.1734973                             | 0.335656345                              | 0.18890158                                         | 3.21918951                          |
| 159.0582716                             | 0.384715285                              | 0.203758939                                        | 3.857834842                         |
| 153.0383436                             | 0.298001587                              | 0.160675976                                        | 4.409151643                         |
| 135.643157                              | 0.497136194                              | 0.286628443                                        | 1.611108644                         |
| 309.808798                              | 0.468796708                              | 0.268646228                                        | 1.915913454                         |
| 232.2151515                             | 0.423990587                              | 0.23328191                                         | 2.265465197                         |
| 338.984375                              | 0.40125033                               | 0.222256248                                        | 2.29747796                          |
| 202.8293396                             | 0.474218494                              | 0.261939539                                        | 2.077670493                         |
| 238.8977636                             | 0.363548124                              | 0.201566784                                        | 2.725565116                         |
| 99.21776504                             | 0.369486396                              | 0.178771566                                        | 6.684927783                         |
| 81.17266187                             | 0.324785399                              | 0.169933118                                        | 4.480248894                         |
| 425.7228957                             | 0.389941865                              | 0.214669597                                        | 2.694248275                         |

| wavelet.HHL_gldm_LargeDependenceEmphasis | wavelet.HHL_gldm_LargeDependenceLowGrayLevelEmphasis | wavelet.HHL_gldm_SmallDependenceHighGrayLevelEmphasis | wavelet.HHL_gldm_LargeDependenceHighGrayLevelEmphasis |
|------------------------------------------|------------------------------------------------------|-------------------------------------------------------|-------------------------------------------------------|
| 5.244109331                              | 0.007844243                                          | 476.8004739                                           | 4406.442036                                           |
| 8.185026738                              | 0.018568778                                          | 242.9875338                                           | 4096.011765                                           |
| 10.80573664                              | 0.045569798                                          | 119.2517081                                           | 2963.435463                                           |
| 10.57215967                              | 0.027364293                                          | 174.0659742                                           | 4600.513818                                           |
| 10.45861486                              | 0.064281841                                          | 71.82965076                                           | 1915.372044                                           |
| 6.803030303                              | 0.04169308                                           | 104.721778                                            | 1466.340909                                           |
| 9.163156963                              | 0.015083154                                          | 298.085531                                            | 6060.510883                                           |
| 12.07635082                              | 0.022850164                                          | 206.8100189                                           | 6711.511159                                           |
| 12.566652                                | 0.02371615                                           | 188.5666415                                           | 6909.995601                                           |
| 6.354477612                              | 0.020310411                                          | 248.3416413                                           | 2664.476679                                           |
| 9.689655172                              | 0.053952878                                          | 93.83550966                                           | 2042.301724                                           |
| 8.011713666                              | 0.011449653                                          | 342.8672816                                           | 6106.133623                                           |
| 21.96304231                              | 0.040894924                                          | 168.7959048                                           | 12190.83771                                           |
| 10.33372161                              | 0.033699119                                          | 133.6907947                                           | 3511.859639                                           |
| 7.302419355                              | 0.010888803                                          | 368.3156309                                           | 5578.579133                                           |
| 8.915904936                              | 0.019352903                                          | 219.8802263                                           | 4559.74543                                            |
| 6.023450586                              | 0.01319251                                           | 279.3775169                                           | 3444.057789                                           |
| 15.78345499                              | 0.035758247                                          | 140.7226029                                           | 7308.646391                                           |
| 11.78582435                              | 0.098591488                                          | 44.88636334                                           | 1580.48151                                            |
| 7.88209271                               | 0.00835865                                           | 494.3738431                                           | 8411.856896                                           |
| 25.18320106                              | 0.167928007                                          | 36.74004527                                           | 3989.457341                                           |
| 10.10287303                              | 0.04698859                                           | 109.6785016                                           | 2428.890639                                           |
| 5.64453125                               | 0.014238326                                          | 275.6954911                                           | 2906.086914                                           |
| 9.230449566                              | 0.033706652                                          | 141.5216875                                           | 2857.34303                                            |
| 7.90494894                               | 0.017479182                                          | 255.5853589                                           | 4418.258445                                           |
| 10.11355002                              | 0.024295901                                          | 210.909326                                            | 5156.864922                                           |
| 7.973090009                              | 0.024138269                                          | 184.6138169                                           | 3120.581503                                           |
| 10.80231716                              | 0.031231541                                          | 157.01528                                             | 4114.91202                                            |
| 6.409395973                              | 0.018736561                                          | 200.7257851                                           | 2744.217002                                           |
| 9.407010711                              | 0.034668822                                          | 135.8963899                                           | 2856.665531                                           |
| 16.68306011                              | 0.063635124                                          | 87.49872012                                           | 4582.622951                                           |
| 7.304494925                              | 0.01499718                                           | 283.9036283                                           | 4097.145964                                           |
| 7.798389594                              | 0.015646709                                          | 266.9559321                                           | 4375.451533                                           |
| 7.331914894                              | 0.021214861                                          | 272.133955                                            | 3782.117447                                           |
| 10.21752952                              | 0.041230335                                          | 114.8214403                                           | 2809.809264                                           |
| 13.16405468                              | 0.033165375                                          | 153.4881709                                           | 5514.72024                                            |
| 13.12039774                              | 0.012157835                                          | 429.8467332                                           | 14784.88605                                           |
| 13.63941097                              | 0.013530758                                          | 457.8479534                                           | 14478.37163                                           |
| 6.099186992                              | 0.025878433                                          | 165.0058227                                           | 1864.144715                                           |
| 7.314442916                              | 0.009675058                                          | 388.1412356                                           | 5966.212105                                           |
| 18.25597533                              | 0.093953297                                          | 66.32889894                                           | 3839.886276                                           |
| 6.664339281                              | 0.016194377                                          | 238.9738459                                           | 3171.250582                                           |
| 12.7946893                               | 0.032268005                                          | 162.6581245                                           | 5347.847523                                           |
| 5.250803859                              | 0.016312132                                          | 251.6343406                                           | 2247.790997                                           |
| 6.946791862                              | 0.021932393                                          | 198.3391961                                           | 2693.169797                                           |
| 7.552276867                              | 0.016322778                                          | 246.0794298                                           | 3893.48051                                            |
| 12.35598422                              | 0.023131192                                          | 200.4037885                                           | 6877.971285                                           |
| 9.411021814                              | 0.012313538                                          | 376.9163068                                           | 8258.69116                                            |
| 7.864864865                              | 0.024773765                                          | 173.6740227                                           | 2985.911868                                           |
| 12.06360947                              | 0.048175363                                          | 112.4009864                                           | 3342.857249                                           |
| 6.681588167                              | 0.016697732                                          | 252.2380384                                           | 3160.169716                                           |
| 6.046573717                              | 0.013705355                                          | 278.3532787                                           | 3105.42124                                            |
| 8.315602837                              | 0.019889716                                          | 206.4230572                                           | 3838.826241                                           |
| 15.06884058                              | 0.103285135                                          | 48.18274874                                           | 2366.540761                                           |
| 11.5037594                               | 0.021325128                                          | 218.4218511                                           | 6945.462406                                           |
| 8.373333333                              | 0.016379835                                          | 258.0841309                                           | 4740.508718                                           |
| 7.362917182                              | 0.012384934                                          | 311.3903498                                           | 4829.844005                                           |
| 7.337767496                              | 0.007877223                                          | 508.9781953                                           | 7695.542221                                           |
| 11.80825243                              | 0.032625575                                          | 143.8878411                                           | 4562.944782                                           |
| 13.69668091                              | 0.028031318                                          | 186.4739758                                           | 6960.831526                                           |
| 5.30804077                               | 0.012546231                                          | 313.995089                                            | 2904.505663                                           |
| 7.342322097                              | 0.005307644                                          | 745.3646429                                           | 11422.84232                                           |
| 9.054240802                              | 0.012770187                                          | 341.8942749                                           | 6838.451028                                           |
| 6.6998557                                | 0.014821721                                          | 255.2318309                                           | 3447.012593                                           |
| 14.65063291                              | 0.074548762                                          | 75.47243189                                           | 3143.786076                                           |
| 12.88917659                              | 0.032255647                                          | 150.6160413                                           | 5415.069394                                           |
| 7.332822086                              | 0.01961099                                           | 232.131776                                            | 3390.953988                                           |
| 6.06656                                  | 0.011140747                                          | 379.4742301                                           | 4324.14032                                            |
| 9.210005122                              | 0.023216573                                          | 175.2640153                                           | 3878.236981                                           |
| 8.888888889                              | 0.019026938                                          | 211.1645866                                           | 4493.140097                                           |
| 11.28021555                              | 0.02901496                                           | 164.0495897                                           | 4757.323326                                           |
| 7.651282051                              | 0.009162622                                          | 449.6024944                                           | 7100.650816                                           |
| 12.06274682                              | 0.021430259                                          | 252.3859823                                           | 7362.388328                                           |
| 6.569721116                              | 0.011944991                                          | 330.1795634                                           | 4286.579017                                           |
| 7.85531779                               | 0.019540482                                          | 224.8435162                                           | 3678.984989                                           |
| 7.019374069                              | 0.036859982                                          | 120.0759615                                           | 1728.368852                                           |
| 8.857262104                              | 0.01104686                                           | 400.2323948                                           | 7757.032972                                           |
| 13.0480167                               | 0.02323665                                           | 213.34826                                             | 7895.757829                                           |
| 11.19917985                              | 0.06855159                                           | 70.89264763                                           | 2011.250732                                           |
| 5.770414707                              | 0.012831981                                          | 305.3295898                                           | 3299.501069                                           |
| 5.032176973                              | 0.009516616                                          | 428.1172322                                           | 3664.592257                                           |
| 12.63090606                              | 0.057321008                                          | 90.99704691                                           | 3049.944699                                           |
| 15.74824105                              | 0.09256855                                           | 66.35098377                                           | 2913.43163                                            |
| 15.41002278                              | 0.105526272                                          | 44.57039455                                           | 2414.727302                                           |
| 7.089380894                              | 0.015808227                                          | 254.8480942                                           | 3672.631816                                           |
| 26.01958225                              | 0.148617455                                          | 50.73034252                                           | 4751.500653                                           |
| 8.01048218                               | 0.021905219                                          | 202.3421525                                           | 3359.368553                                           |
| 14.37490883                              | 0.027348439                                          | 183.1726621                                           | 7965.75857                                            |
| 11.80601093                              | 0.061195196                                          | 76.43540586                                           | 2488.894809                                           |
| 11.83950617                              | 0.03084493                                           | 174.8373847                                           | 5054.918519                                           |
| 15.54754601                              | 0.065618039                                          | 89.83065029                                           | 4240.43865                                            |
| 6.105793451                              | 0.006469825                                          | 555.3985913                                           | 6519.058354                                           |
| 6.908547173                              | 0.011887439                                          | 327.4123365                                           | 4468.632066                                           |
| 8.323030303                              | 0.01183639                                           | 338.8011368                                           | 6286.88                                               |
| 8.781709559                              | 0.014200159                                          | 276.8301138                                           | 5763.272518                                           |
| 7.251899474                              | 0.012551746                                          | 332.9828725                                           | 4727.928697                                           |
| 10.32765353                              | 0.023969924                                          | 179.2426149                                           | 4778.394391                                           |
| 17.36103152                              | 0.043553118                                          | 172.8749886                                           | 7359.275072                                           |
| 14.76019185                              | 0.037446259                                          | 150.574622                                            | 6251.002398                                           |
| 9.649809491                              | 0.018577917                                          | 238.3969249                                           | 5426.593869                                           |

| wavelet.HHL_gldm_SmallDependenceLowGrayLevelEmphasis | wavelet.HHL_gldm_LowGrayLevelEmphasis | wavelet.HHL_gldm_DistanceZoneVariabilityNormalized | wavelet.HHL_gldm_LowIntensityEmphasis |
|------------------------------------------------------|---------------------------------------|----------------------------------------------------|---------------------------------------|
| 0.001519101                                          | 0.002166283                           | 0.996920716                                        | 0.002669219                           |
| 0.002097923                                          | 0.003355294                           | 1                                                  | 0.004647117                           |
| 0.003189283                                          | 0.006048454                           | 1                                                  | 0.007968279                           |
| 0.002495498                                          | 0.004070003                           | 1                                                  | 0.006034655                           |
| 0.003260821                                          | 0.007419588                           | 1                                                  | 0.009395186                           |
| 0.00662796                                           | 0.010038616                           | 1                                                  | 0.013626376                           |
| 0.001092753                                          | 0.002052068                           | 0.997090915                                        | 0.002481509                           |
| 0.001081631                                          | 0.002328799                           | 0.999                                              | 0.002990494                           |
| 0.000929443                                          | 0.002197109                           | 0.998797355                                        | 0.002742404                           |
| 0.002825534                                          | 0.004646718                           | 1                                                  | 0.005676052                           |
| 0.004052511                                          | 0.007493113                           | 1                                                  | 0.01002419                            |
| 0.001185066                                          | 0.001958104                           | 0.996463318                                        | 0.00256973                            |
| 0.001223447                                          | 0.002581336                           | 1                                                  | 0.004272798                           |
| 0.002411242                                          | 0.004527699                           | 1                                                  | 0.006602694                           |
| 0.001471656                                          | 0.002244417                           | 1                                                  | 0.003014923                           |
| 0.001436107                                          | 0.00276807                            | 1                                                  | 0.003399662                           |
| 0.002312411                                          | 0.003394046                           | 1                                                  | 0.004529125                           |
| 0.001554262                                          | 0.003179329                           | 1                                                  | 0.005243982                           |
| 0.004410306                                          | 0.010355091                           | 1                                                  | 0.013943031                           |
| 0.000930235                                          | 0.001521219                           | 0.99923635                                         | 0.001994855                           |
| 0.002283873                                          | 0.00819144                            | 1                                                  | 0.011403029                           |
| 0.003529824                                          | 0.006384253                           | 0.984128                                           | 0.008360285                           |
| 0.002436629                                          | 0.003696751                           | 1                                                  | 0.00468489                            |
| 0.002302748                                          | 0.004552974                           | 1                                                  | 0.005579931                           |
| 0.002260098                                          | 0.003591108                           | 1                                                  | 0.004965709                           |
| 0.001210624                                          | 0.003148392                           | 1                                                  | 0.003548648                           |
| 0.00235673                                           | 0.004156365                           | 1                                                  | 0.005194166                           |
| 0.002172969                                          | 0.004013911                           | 1                                                  | 0.005580187                           |
| 0.003627755                                          | 0.005056667                           | 1                                                  | 0.007394726                           |
| 0.002471468                                          | 0.00478134                            | 1                                                  | 0.006129055                           |
| 0.001685347                                          | 0.004494749                           | 0.998610147                                        | 0.005873697                           |
| 0.001649736                                          | 0.002726002                           | 1                                                  | 0.003399476                           |
| 0.001539472                                          | 0.002654016                           | 0.998763142                                        | 0.003344105                           |
| 0.002216269                                          | 0.004156435                           | 1                                                  | 0.004770559                           |
| 0.002751945                                          | 0.005332506                           | 0.992493404                                        | 0.00707226                            |
| 0.001429665                                          | 0.003141187                           | 0.996386642                                        | 0.004162373                           |
| 0.000665417                                          | 0.001253187                           | 1                                                  | 0.001778315                           |
| 0.000689993                                          | 0.001296551                           | 0.992537418                                        | 0.001624759                           |
| 0.004143624                                          | 0.006338862                           | 1                                                  | 0.008356245                           |
| 0.000853466                                          | 0.00157151                            | 0.996315802                                        | 0.001816963                           |
| 0.002505061                                          | 0.006474038                           | 1                                                  | 0.008930757                           |
| 0.001888985                                          | 0.003160351                           | 0.993430386                                        | 0.003784254                           |
| 0.001333317                                          | 0.003022484                           | 1                                                  | 0.003761441                           |
| 0.003124538                                          | 0.004527408                           | 1                                                  | 0.005575928                           |
| 0.002669184                                          | 0.004386867                           | 1                                                  | 0.005572224                           |
| 0.001452068                                          | 0.002666895                           | 1                                                  | 0.003159374                           |
| 0.000965949                                          | 0.002212439                           | 1                                                  | 0.002762864                           |
| 0.001798003                                          | 0.002519087                           | 1                                                  | 0.00414968                            |
| 0.003348992                                          | 0.005121069                           | 1                                                  | 0.007333403                           |
| 0.003374227                                          | 0.005887304                           | 0.989305122                                        | 0.008643623                           |
| 0.002190487                                          | 0.003453895                           | 0.997173151                                        | 0.0043152                             |
| 0.001765562                                          | 0.002879606                           | 0.998961039                                        | 0.003402687                           |
| 0.001553742                                          | 0.002973054                           | 0.998113209                                        | 0.003642531                           |
| 0.003524413                                          | 0.00862762                            | 1                                                  | 0.01262617                            |
| 0.002060199                                          | 0.003257155                           | 1                                                  | 0.005345427                           |
| 0.001449904                                          | 0.002586789                           | 1                                                  | 0.003299614                           |
| 0.001134196                                          | 0.002057358                           | 0.997152355                                        | 0.002424182                           |
| 0.000878696                                          | 0.001445658                           | 1                                                  | 0.001809443                           |
| 0.00184829                                           | 0.003621317                           | 1                                                  | 0.005064867                           |
| 0.00096953                                           | 0.002326                              | 0.999451754                                        | 0.002691392                           |
| 0.00240656                                           | 0.003468433                           | 0.996150159                                        | 0.004394096                           |
| 0.000735731                                          | 0.001105032                           | 1                                                  | 0.001499929                           |
| 0.000865719                                          | 0.001690053                           | 0.994192427                                        | 0.001998918                           |
| 0.001570832                                          | 0.002758302                           | 0.982345687                                        | 0.003275367                           |
| 0.003653269                                          | 0.007221625                           | 1                                                  | 0.011038995                           |
| 0.001263029                                          | 0.002964022                           | 0.993002186                                        | 0.003688382                           |
| 0.003332998                                          | 0.004694701                           | 1                                                  | 0.0068919                             |
| 0.001367156                                          | 0.002407332                           | 0.996045213                                        | 0.002771163                           |
| 0.001333376                                          | 0.002879519                           | 1                                                  | 0.003318746                           |
| 0.001352898                                          | 0.002654462                           | 1                                                  | 0.003313814                           |
| 0.001841176                                          | 0.003496536                           | 1                                                  | 0.004812074                           |
| 0.000868755                                          | 0.001530553                           | 0.998196575                                        | 0.001851363                           |
| 0.001366989                                          | 0.002470504                           | 1                                                  | 0.003387926                           |
| 0.001850388                                          | 0.002755052                           | 1                                                  | 0.003684032                           |
| 0.001746692                                          | 0.003188869                           | 0.994907735                                        | 0.003853911                           |
| 0.00512747                                           | 0.008090457                           | 1                                                  | 0.010856695                           |
| 0.001090447                                          | 0.001786485                           | 1                                                  | 0.002408896                           |
| 0.00173958                                           | 0.002887955                           | 1                                                  | 0.004816968                           |
| 0.003478637                                          | 0.007560779                           | 0.993817679                                        | 0.009965769                           |
| 0.002514639                                          | 0.0035298                             | 1                                                  | 0.004593477                           |
| 0.002338051                                          | 0.0030894                             | 1                                                  | 0.003944445                           |
| 0.002827496                                          | 0.00598692                            | 1                                                  | 0.008238265                           |
| 0.003501428                                          | 0.007847628                           | 0.993073677                                        | 0.010870679                           |
| 0.002804667                                          | 0.007975855                           | 1                                                  | 0.010702648                           |
| 0.001581969                                          | 0.002781068                           | 0.998433383                                        | 0.003331446                           |
| 0.00243498                                           | 0.007182072                           | 1                                                  | 0.010594198                           |
| 0.001905408                                          | 0.003514164                           | 1                                                  | 0.004299071                           |
| 0.001280121                                          | 0.002569757                           | 1                                                  | 0.003727958                           |
| 0.003486615                                          | 0.006977619                           | 1                                                  | 0.009895176                           |
| 0.002171148                                          | 0.003874729                           | 1                                                  | 0.005452867                           |
| 0.00188733                                           | 0.005854407                           | 1                                                  | 0.007456662                           |
| 0.000966463                                          | 0.001465131                           | 0.998536943                                        | 0.001821064                           |
| 0.001228097                                          | 0.002127821                           | 0.992195934                                        | 0.002504236                           |
| 0.00096994                                           | 0.001778434                           | 1                                                  | 0.00219211                            |
| 0.000963413                                          | 0.00192734                            | 0.998988366                                        | 0.002320137                           |
| 0.001427355                                          | 0.002322485                           | 0.99674091                                         | 0.002869157                           |
| 0.001472305                                          | 0.002942491                           | 0.998266899                                        | 0.003881938                           |
| 0.00252099                                           | 0.00411435                            | 1                                                  | 0.006401245                           |
| 0.00219759                                           | 0.003919787                           | 1                                                  | 0.006324276                           |
| 0.001113886                                          | 0.002321303                           | 0.996904032                                        | 0.002780473                           |



| wavelet.HHL_gldzm_LargeDistanceEmphasis | wavelet.HHL_gldzm_HighIntensitySmallDistanceEmphasis | wavelet.HHL_gldzm_LowIntensityLargeDistanceEmphasis | wavelet.HHL_gldzm_HighIntensityEmphasis |
|-----------------------------------------|------------------------------------------------------|-----------------------------------------------------|-----------------------------------------|
| 1.00462606                              | 885.9685813                                          | 0.002673913                                         | 887.1187355                             |
| 1                                       | 563.8129176                                          | 0.004647117                                         | 563.8129176                             |
| 1                                       | 305.8017366                                          | 0.007968279                                         | 305.8017366                             |
| 1                                       | 447.5221445                                          | 0.006034655                                         | 447.5221445                             |
| 1                                       | 211.3274336                                          | 0.009395186                                         | 211.3274336                             |
| 1                                       | 228.6267806                                          | 0.013626376                                         | 228.6267806                             |
| 1.004369993                             | 699.2158594                                          | 0.002486506                                         | 700.274217                              |
| 1.00150075                              | 584.858054                                           | 0.002992055                                         | 585.2186093                             |
| 1.001805054                             | 573.130716                                           | 0.002746497                                         | 573.3297232                             |
| 1                                       | 497.9465776                                          | 0.005676052                                         | 497.9465776                             |
| 1                                       | 243.8096677                                          | 0.01002419                                          | 243.8096677                             |
| 1.005314438                             | 778.5571302                                          | 0.002576642                                         | 779.7077059                             |
| 1                                       | 604.9151625                                          | 0.004272798                                         | 604.9151625                             |
| 1                                       | 383.6661699                                          | 0.006602694                                         | 383.6661699                             |
| 1                                       | 798.2787996                                          | 0.003014923                                         | 798.2787996                             |
| 1                                       | 532.8689487                                          | 0.003399662                                         | 532.8689487                             |
| 1                                       | 595.3414634                                          | 0.004529125                                         | 595.3414634                             |
| 1                                       | 491.4854881                                          | 0.005243982                                         | 491.4854881                             |
| 1                                       | 146.5861298                                          | 0.013943031                                         | 146.5861298                             |
| 1.001145913                             | 1111.605519                                          | 0.001995791                                         | 1111.956455                             |
| 1                                       | 166.4718615                                          | 0.011403029                                         | 166.4718615                             |
| 1.024                                   | 271.0365                                             | 0.008759139                                         | 271.77                                  |
| 1                                       | 559.8913793                                          | 0.00468489                                          | 559.8913793                             |
| 1                                       | 349.0371901                                          | 0.005579931                                         | 349.0371901                             |
| 1                                       | 579.3748031                                          | 0.004965709                                         | 579.3748031                             |
| 1                                       | 544.8138402                                          | 0.003548648                                         | 544.8138402                             |
| 1                                       | 419.8687922                                          | 0.005194166                                         | 419.8687922                             |
| 1                                       | 419.4174589                                          | 0.005580187                                         | 419.4174589                             |
| 1                                       | 451.4652174                                          | 0.007394726                                         | 451.4652174                             |
| 1                                       | 346.6931567                                          | 0.006129055                                         | 346.6931567                             |
| 1.002086231                             | 307.6453408                                          | 0.005878007                                         | 307.8977747                             |
| 1                                       | 614.6118299                                          | 0.003399476                                         | 614.6118299                             |
| 1.001856436                             | 607.6121597                                          | 0.003346651                                         | 607.950495                              |
| 1                                       | 558.7315749                                          | 0.004770559                                         | 558.7315749                             |
| 1.011302476                             | 302.2595533                                          | 0.007109269                                         | 303.6081808                             |
| 1.005429864                             | 450.9660633                                          | 0.004194502                                         | 451.1954751                             |
| 1                                       | 1182.967764                                          | 0.001778315                                         | 1182.967764                             |
| 1.011235955                             | 1116.984186                                          | 0.001639111                                         | 1119.685809                             |
| 1                                       | 352.0438729                                          | 0.008356245                                         | 352.0438729                             |
| 1.005536515                             | 852.6382151                                          | 0.001825779                                         | 853.6994463                             |
| 1                                       | 235.0100756                                          | 0.008930757                                         | 235.0100756                             |
| 1.009887006                             | 494.8086158                                          | 0.003814937                                         | 496.240113                              |
| 1                                       | 468.1843972                                          | 0.003761441                                         | 468.1843972                             |
| 1                                       | 473.311008                                           | 0.005575928                                         | 473.311008                              |
| 1                                       | 438.2686567                                          | 0.005572224                                         | 438.2686567                             |
| 1                                       | 553.2229345                                          | 0.003159374                                         | 553.2229345                             |
| 1                                       | 586.6976065                                          | 0.002762864                                         | 586.6976065                             |
| 1                                       | 947.877551                                           | 0.00414968                                          | 947.877551                              |
| 1                                       | 414.4892086                                          | 0.007333403                                         | 414.4892086                             |
| 1.016129032                             | 305.1733871                                          | 0.008717412                                         | 306.3387097                             |
| 1.004246285                             | 522.3016631                                          | 0.004331189                                         | 522.5930644                             |
| 1.001559252                             | 559.6721674                                          | 0.003404309                                         | 560.0467775                             |
| 1.002832861                             | 498.7521246                                          | 0.0036462                                           | 499.3101983                             |
| 1                                       | 177.2160494                                          | 0.01262617                                          | 177.2160494                             |
| 1                                       | 594.1700555                                          | 0.005345427                                         | 594.1700555                             |
| 1                                       | 613.7046908                                          | 0.003299614                                         | 613.7046908                             |
| 1.004277567                             | 690.3493346                                          | 0.002441258                                         | 691.1178707                             |
| 1                                       | 1107.486324                                          | 0.001809443                                         | 1107.486324                             |
| 1                                       | 415.6755486                                          | 0.005064867                                         | 415.6755486                             |
| 1.000822594                             | 528.1554702                                          | 0.002692609                                         | 528.2944886                             |
| 1.005785921                             | 609.9985535                                          | 0.00406125                                          | 610.7000964                             |
| 1                                       | 1624.617541                                          | 0.001499929                                         | 1624.617541                             |
| 1.008736804                             | 803.1103021                                          | 0.00203387                                          | 804.4066254                             |
| 1.026719446                             | 549.1805418                                          | 0.003403957                                         | 552.6078674                             |
| 1                                       | 237.0394265                                          | 0.011038995                                         | 237.0394265                             |
| 1.010533708                             | 449.1437851                                          | 0.003701695                                         | 451.241573                              |
| 1                                       | 512.3423831                                          | 0.0068919                                           | 512.3423831                             |
| 1.005943957                             | 761.1756298                                          | 0.002780825                                         | 762.3988112                             |
| 1                                       | 443.5307692                                          | 0.003318746                                         | 443.5307692                             |
| 1                                       | 539.171911                                           | 0.003313814                                         | 539.171911                              |
| 1                                       | 451.7705224                                          | 0.004812074                                         | 451.7705224                             |
| 1.002707581                             | 989.6900948                                          | 0.001852893                                         | 990.9210289                             |
| 1                                       | 654.9796748                                          | 0.003387926                                         | 654.9796748                             |
| 1                                       | 699.8688119                                          | 0.003684032                                         | 699.8688119                             |
| 1.007657945                             | 511.7298979                                          | 0.003874103                                         | 512.535418                              |
| 1                                       | 272.1726619                                          | 0.010856695                                         | 272.1726619                             |
| 1                                       | 926.0363636                                          | 0.002408896                                         | 926.0363636                             |
| 1                                       | 623.933518                                           | 0.004816968                                         | 623.933518                              |
| 1.009302326                             | 208.2170543                                          | 0.010023909                                         | 208.7984496                             |
| 1                                       | 596.8917337                                          | 0.004593477                                         | 596.8917337                             |
| 1                                       | 772.3782051                                          | 0.003944445                                         | 772.3782051                             |
| 1                                       | 273.4394619                                          | 0.008238265                                         | 273.4394619                             |
| 1.010425717                             | 206.7356646                                          | 0.010967669                                         | 207.5065161                             |
| 1                                       | 171.5576471                                          | 0.010702648                                         | 171.5576471                             |
| 1.002351097                             | 559.9241771                                          | 0.003334671                                         | 560.3526646                             |
| 1                                       | 218.5289474                                          | 0.010594198                                         | 218.5289474                             |
| 1                                       | 465.7832048                                          | 0.004299071                                         | 465.7832048                             |
| 1                                       | 550.9315206                                          | 0.003727958                                         | 550.9315206                             |
| 1                                       | 228.0846847                                          | 0.009895176                                         | 228.0846847                             |
| 1                                       | 451.5817143                                          | 0.005452867                                         | 451.5817143                             |
| 1                                       | 300.0990566                                          | 0.007456662                                         | 300.0990566                             |
| 1.002196193                             | 1114.955344                                          | 0.001826555                                         | 1115.174963                             |
| 1.011752137                             | 693.4618056                                          | 0.002521989                                         | 696.0235043                             |
| 1                                       | 795.5890497                                          | 0.002192111                                         | 795.5890497                             |
| 1.001518219                             | 687.6893978                                          | 0.002321717                                         | 688.0541498                             |
| 1.004896627                             | 699.3226333                                          | 0.002890934                                         | 699.8808487                             |
| 1.002601908                             | 491.0823938                                          | 0.003885257                                         | 491.5923677                             |
| 1                                       | 463.2396313                                          | 0.006401245                                         | 463.2396313                             |
| 1                                       | 460.6742671                                          | 0.006324276                                         | 460.6742671                             |
| 1.004651163                             | 604.6619186                                          | 0.002794065                                         | 605.1034884                             |

| wavelet.HHL_gldzm_DistanceZoneVariability | wavelet.HHL_gldzm_ZonePercentage | wavelet.HHL_gldzm_IntensityVariabilityNormalized | wavelet.HHL_gldzm_LowIntensitySmallDistanceEmphasis | wavelet.HHL_gldzm_IntensityVariability |
|-------------------------------------------|----------------------------------|--------------------------------------------------|-----------------------------------------------------|----------------------------------------|
| 1293.006168                               | 0.611215834                      | 0.03623866                                       | 0.002668046                                         | 47.00154202                            |
| 449                                       | 0.480213904                      | 0.050242806                                      | 0.004647117                                         | 22.55902004                            |
| 691                                       | 0.450456323                      | 0.051664883                                      | 0.007968279                                         | 35.70043415                            |
| 429                                       | 0.439099284                      | 0.047549187                                      | 0.006034655                                         | 20.3986014                             |
| 904                                       | 0.381756757                      | 0.065189619                                      | 0.009395186                                         | 58.93141593                            |
| 351                                       | 0.531818182                      | 0.053806381                                      | 0.013626376                                         | 18.86603989                            |
| 2738.011653                               | 0.485931694                      | 0.046154932                                      | 0.00248026                                          | 126.7414421                            |
| 1997.001001                               | 0.391346907                      | 0.051981719                                      | 0.002990103                                         | 103.9114557                            |
| 1660.001203                               | 0.365596128                      | 0.060322694                                      | 0.002741381                                         | 100.2563177                            |
| 599                                       | 0.558768657                      | 0.043291407                                      | 0.005676052                                         | 25.93155259                            |
| 662                                       | 0.438992042                      | 0.057479395                                      | 0.01002419                                          | 38.05135952                            |
| 1125.007086                               | 0.489804772                      | 0.047482389                                      | 0.002568003                                         | 53.60761736                            |
| 554                                       | 0.296732726                      | 0.061150282                                      | 0.004272798                                         | 33.87725632                            |
| 671                                       | 0.390797903                      | 0.055288168                                      | 0.006602694                                         | 37.09836066                            |
| 1033                                      | 0.520665323                      | 0.041019072                                      | 0.003014923                                         | 42.37270087                            |
| 2045                                      | 0.467321755                      | 0.046154435                                      | 0.003399662                                         | 94.38581907                            |
| 656                                       | 0.549413735                      | 0.044941627                                      | 0.004529125                                         | 29.48170732                            |
| 379                                       | 0.307380373                      | 0.06313657                                       | 0.005243982                                         | 23.92875989                            |
| 447                                       | 0.344375963                      | 0.0757073                                        | 0.013943031                                         | 33.84116331                            |
| 2616.000764                               | 0.503558377                      | 0.042632221                                      | 0.001994622                                         | 111.6111536                            |
| 693                                       | 0.229166667                      | 0.083108971                                      | 0.011403029                                         | 57.59451659                            |
| 492.064                                   | 0.46339203                       | 0.056696                                         | 0.008260572                                         | 28.348                                 |
| 580                                       | 0.56640625                       | 0.042009512                                      | 0.00468489                                          | 24.36551724                            |
| 1210                                      | 0.457121269                      | 0.055086401                                      | 0.005579931                                         | 66.65454545                            |
| 635                                       | 0.498821681                      | 0.041101122                                      | 0.004965709                                         | 26.0992126                             |
| 1026                                      | 0.433094133                      | 0.054930482                                      | 0.003548648                                         | 56.35867446                            |
| 1631                                      | 0.504484998                      | 0.045447249                                      | 0.005194166                                         | 74.12446352                            |
| 1157                                      | 0.418899348                      | 0.050952117                                      | 0.005580187                                         | 58.95159896                            |
| 230                                       | 0.514541387                      | 0.057542533                                      | 0.007394726                                         | 13.23478261                            |
| 906                                       | 0.441090555                      | 0.053477187                                      | 0.006129055                                         | 48.45033113                            |
| 1436.001391                               | 0.302227827                      | 0.063704999                                      | 0.005872619                                         | 91.6077886                             |
| 1082                                      | 0.522957951                      | 0.041094229                                      | 0.003399476                                         | 44.46395564                            |
| 1614.001238                               | 0.50046454                       | 0.044637168                                      | 0.003343468                                         | 72.13366337                            |
| 1289                                      | 0.548510638                      | 0.038769898                                      | 0.004770559                                         | 49.97439876                            |
| 1844.052745                               | 0.421889192                      | 0.057141549                                      | 0.007063008                                         | 106.1689989                            |
| 1101.00724                                | 0.368456152                      | 0.054432137                                      | 0.00415434                                          | 60.14751131                            |
| 1458                                      | 0.391830153                      | 0.047272416                                      | 0.001778315                                         | 68.92318244                            |
| 2385.067416                               | 0.46560744                       | 0.040462149                                      | 0.001621171                                         | 97.23054515                            |
| 661                                       | 0.537398374                      | 0.050697952                                      | 0.008356245                                         | 33.51134644                            |
| 3779.025837                               | 0.52173315                       | 0.045966771                                      | 0.001814759                                         | 174.3519641                            |
| 794                                       | 0.306090979                      | 0.067372422                                      | 0.008930757                                         | 53.49370277                            |
| 2110.046139                               | 0.549262995                      | 0.046389394                                      | 0.003776584                                         | 98.53107345                            |
| 1410                                      | 0.385984123                      | 0.05693778                                       | 0.003761441                                         | 80.2822695                             |
| 1508                                      | 0.606109325                      | 0.04133305                                       | 0.005575928                                         | 62.33023873                            |
| 670                                       | 0.524256651                      | 0.045952328                                      | 0.005572224                                         | 30.7880597                             |
| 1404                                      | 0.51147541                       | 0.049766236                                      | 0.003159374                                         | 69.87179487                            |
| 1713                                      | 0.375493205                      | 0.058645999                                      | 0.002762864                                         | 100.4605954                            |
| 392                                       | 0.450057405                      | 0.051163578                                      | 0.00414968                                          | 20.05612245                            |
| 417                                       | 0.490011751                      | 0.051705398                                      | 0.007333403                                         | 21.56115108                            |
| 552.0322581                               | 0.412721893                      | 0.058086356                                      | 0.008625176                                         | 32.41218638                            |
| 1409.005662                               | 0.550019463                      | 0.04444775                                       | 0.004311203                                         | 62.80467091                            |
| 1922.00104                                | 0.570750519                      | 0.044688279                                      | 0.003402281                                         | 85.98024948                            |
| 2114.003777                               | 0.469414894                      | 0.050477449                                      | 0.003641614                                         | 106.911237                             |
| 324                                       | 0.293478261                      | 0.077141442                                      | 0.01262617                                          | 24.99382716                            |
| 541                                       | 0.406766917                      | 0.049989579                                      | 0.005345427                                         | 27.04436229                            |
| 938                                       | 0.481025641                      | 0.04939512                                       | 0.003299614                                         | 46.3326226                             |
| 2098.008555                               | 0.520148331                      | 0.045267298                                      | 0.002419913                                         | 95.24239544                            |
| 1828                                      | 0.528629265                      | 0.040049427                                      | 0.001809443                                         | 73.21006565                            |
| 638                                       | 0.387135922                      | 0.058475251                                      | 0.005064867                                         | 37.30721003                            |
| 3645.000548                               | 0.399496111                      | 0.056753867                                      | 0.002691088                                         | 206.9813545                            |
| 1033.007715                               | 0.587202718                      | 0.04186005                                       | 0.004391089                                         | 43.40887175                            |
| 1391                                      | 0.520973783                      | 0.041101753                                      | 0.001499929                                         | 57.17253774                            |
| 2731.046596                               | 0.474520643                      | 0.046654463                                      | 0.00199018                                          | 128.1598107                            |
| 3970.641267                               | 0.530237439                      | 0.046755235                                      | 0.003243219                                         | 188.9846611                            |
| 279                                       | 0.353164557                      | 0.068048972                                      | 0.011038995                                         | 18.9566308                             |
| 1414.035112                               | 0.36872087                       | 0.057007283                                      | 0.003685054                                         | 81.17837079                            |
| 663                                       | 0.508435583                      | 0.043763323                                      | 0.0068919                                           | 29.01508296                            |
| 3519.027738                               | 0.56528                          | 0.040090325                                      | 0.002768748                                         | 141.6391169                            |
| 2600                                      | 0.443913266                      | 0.060461243                                      | 0.003318746                                         | 157.1992308                            |
| 1303                                      | 0.449620428                      | 0.05395012                                       | 0.003313814                                         | 70.29700691                            |
| 536                                       | 0.412625096                      | 0.057814937                                      | 0.004812074                                         | 30.98880597                            |
| 2212.00361                                | 0.516550117                      | 0.040280565                                      | 0.001850981                                         | 89.26173285                            |
| 984                                       | 0.431768319                      | 0.045963051                                      | 0.003387926                                         | 45.22764228                            |
| 1212                                      | 0.536520584                      | 0.043854633                                      | 0.003684032                                         | 53.15181518                            |
| 1559.020421                               | 0.50047908                       | 0.044899814                                      | 0.003848863                                         | 70.35800893                            |
| 695                                       | 0.517883756                      | 0.053357487                                      | 0.010856695                                         | 37.08345324                            |
| 1155                                      | 0.482053422                      | 0.045349225                                      | 0.002408896                                         | 52.37835498                            |
| 361                                       | 0.376826722                      | 0.054242985                                      | 0.004816968                                         | 19.58171745                            |
| 641.0124031                               | 0.377858888                      | 0.068065621                                      | 0.009951234                                         | 43.90232558                            |
| 1367                                      | 0.584437794                      | 0.042589751                                      | 0.004593477                                         | 58.2201902                             |
| 1248                                      | 0.62745098                       | 0.036399264                                      | 0.003944445                                         | 45.42628205                            |
| 669                                       | 0.371873263                      | 0.056852585                                      | 0.008238265                                         | 38.0437967                             |
| 1143.027802                               | 0.352095442                      | 0.064227759                                      | 0.010846431                                         | 73.92615117                            |
| 850                                       | 0.276602668                      | 0.077240138                                      | 0.010702648                                         | 65.65411765                            |
| 1274.001567                               | 0.523165232                      | 0.045434892                                      | 0.00333064                                          | 57.97492163                            |
| 380                                       | 0.248041775                      | 0.074224377                                      | 0.010594198                                         | 28.20526316                            |
| 1167                                      | 0.489308176                      | 0.050618663                                      | 0.004299071                                         | 59.07197943                            |
| 993                                       | 0.36214442                       | 0.056383608                                      | 0.003727958                                         | 55.98892246                            |
| 555                                       | 0.379098361                      | 0.065517409                                      | 0.009895176                                         | 36.36216216                            |
| 875                                       | 0.432098765                      | 0.049897796                                      | 0.005452867                                         | 43.66057143                            |
| 424                                       | 0.325153374                      | 0.074192328                                      | 0.007456662                                         | 31.45754717                            |
| 1364.001464                               | 0.573467674                      | 0.043405096                                      | 0.001819692                                         | 59.29136164                            |
| 2786.086182                               | 0.541771175                      | 0.045217774                                      | 0.002499798                                         | 126.97151                              |
| 1589                                      | 0.481515152                      | 0.048964304                                      | 0.00219211                                          | 77.80427942                            |
| 1974.001012                               | 0.454044118                      | 0.054152871                                      | 0.002319742                                         | 107.0060729                            |
| 1832.009793                               | 0.5371128                        | 0.043014655                                      | 0.002863713                                         | 79.0609358                             |
| 1151.001735                               | 0.409300674                      | 0.055259894                                      | 0.003881108                                         | 63.71465742                            |
| 434                                       | 0.41451767                       | 0.050489499                                      | 0.006401245                                         | 21.9124424                             |
| 307                                       | 0.368105516                      | 0.062440981                                      | 0.006324276                                         | 19.16938111                            |
| 2572.012403                               | 0.44683062                       | 0.049815816                                      | 0.002777075                                         | 128.5248062                            |

| wavelet.HHL_gldzm_HighIntensityLargeDistanceEmphasis | wavelet.HHL_gldzm_SmallDistanceEmphasis | wavelet.HHL_gldzm_SumVariance | wavelet.HHL_gldcm_Homogeneity1 | wavelet.HHL_gldcm_Homogeneity2 |
|------------------------------------------------------|-----------------------------------------|-------------------------------|--------------------------------|--------------------------------|
| 891.7193524                                          | 0.998843485                             | 2778.798102                   | 0.220137262                    | 0.133305842                    |
| 563.8129176                                          | 1                                       | 1691.391619                   | 0.297032166                    | 0.209732386                    |
| 305.8017366                                          | 1                                       | 853.1102274                   | 0.313522979                    | 0.227376733                    |
| 447.5221445                                          | 1                                       | 1351.572438                   | 0.308575903                    | 0.224990711                    |
| 211.3274336                                          | 1                                       | 545.3983058                   | 0.342853238                    | 0.252558925                    |
| 228.6267806                                          | 1                                       | 627.9096023                   | 0.283660616                    | 0.191184236                    |
| 704.5076475                                          | 0.998907502                             | 2188.520934                   | 0.286499737                    | 0.197799622                    |
| 586.6608304                                          | 0.999624812                             | 1855.855028                   | 0.329606695                    | 0.243580292                    |
| 574.1257521                                          | 0.999548736                             | 1855.999345                   | 0.34442953                     | 0.255497908                    |
| 497.9465776                                          | 1                                       | 1405.323072                   | 0.261039375                    | 0.172638413                    |
| 243.8096677                                          | 1                                       | 652.5581442                   | 0.319873183                    | 0.232325159                    |
| 784.3100089                                          | 0.998671391                             | 2558.330701                   | 0.283504373                    | 0.193980246                    |
| 604.9151625                                          | 1                                       | 1889.522154                   | 0.401474076                    | 0.328407284                    |
| 383.6661699                                          | 1                                       | 1078.881698                   | 0.323534888                    | 0.23437552                     |
| 798.2787996                                          | 1                                       | 2529.255781                   | 0.267110923                    | 0.180250448                    |
| 532.8689487                                          | 1                                       | 1627.884657                   | 0.28964754                     | 0.201807775                    |
| 595.3414634                                          | 1                                       | 1839.360761                   | 0.258336648                    | 0.167747544                    |
| 491.4854881                                          | 1                                       | 1529.290827                   | 0.37899811                     | 0.298183218                    |
| 146.5861298                                          | 1                                       | 375.3565106                   | 0.370755426                    | 0.282563923                    |
| 1113.360199                                          | 0.999713522                             | 3680.53518                    | 0.271847105                    | 0.182813707                    |
| 166.4718615                                          | 1                                       | 468.0619622                   | 0.454401354                    | 0.384938475                    |
| 274.704                                              | 0.994                                   | 753.3102158                   | 0.316346281                    | 0.226809029                    |
| 559.8913793                                          | 1                                       | 1657.44555                    | 0.243895678                    | 0.155293368                    |
| 349.0371901                                          | 1                                       | 964.4058371                   | 0.309871379                    | 0.219857024                    |
| 579.3748031                                          | 1                                       | 1801.299131                   | 0.272588698                    | 0.18479993                     |
| 544.8138402                                          | 1                                       | 1687.884991                   | 0.325789203                    | 0.239120888                    |
| 419.8687922                                          | 1                                       | 1207.23153                    | 0.276023513                    | 0.186656967                    |
| 419.4174589                                          | 1                                       | 1211.627382                   | 0.319106427                    | 0.23292292                     |
| 451.4652174                                          | 1                                       | 1357.529902                   | 0.288794746                    | 0.196426316                    |
| 346.6931567                                          | 1                                       | 943.828481                    | 0.312026287                    | 0.222801893                    |
| 308.9075104                                          | 0.999478442                             | 867.5853186                   | 0.378173617                    | 0.296155037                    |
| 614.6118299                                          | 1                                       | 1870.939216                   | 0.256834069                    | 0.168842594                    |
| 609.3038366                                          | 0.999535891                             | 1861.64235                    | 0.277195527                    | 0.187938493                    |
| 558.7315749                                          | 1                                       | 1625.049187                   | 0.247842231                    | 0.162894403                    |
| 309.0026911                                          | 0.997174381                             | 849.003346                    | 0.323101383                    | 0.232320466                    |
| 452.1131222                                          | 0.998642534                             | 1356.453243                   | 0.349113044                    | 0.266383881                    |
| 1182.967764                                          | 1                                       | 3946.609256                   | 0.329679267                    | 0.24663758                     |
| 1130.492301                                          | 0.997191011                             | 3652.90954                    | 0.294959909                    | 0.213706158                    |
| 352.0438729                                          | 1                                       | 963.4013996                   | 0.262054387                    | 0.168707191                    |
| 857.9443712                                          | 0.998615871                             | 2754.281303                   | 0.268974936                    | 0.179274815                    |
| 235.0100756                                          | 1                                       | 644.4012155                   | 0.393988542                    | 0.314947099                    |
| 501.9661017                                          | 0.997528249                             | 1497.979819                   | 0.262283611                    | 0.172333041                    |
| 468.1843972                                          | 1                                       | 1368.402855                   | 0.341384493                    | 0.257063181                    |
| 473.311008                                           | 1                                       | 1358.352151                   | 0.230073217                    | 0.140501483                    |
| 438.2686567                                          | 1                                       | 1235.841721                   | 0.26383394                     | 0.175063816                    |
| 553.2229345                                          | 1                                       | 1687.739204                   | 0.285815792                    | 0.196394053                    |
| 586.6976065                                          | 1                                       | 1865.534217                   | 0.341509262                    | 0.25312246                     |
| 947.877551                                           | 1                                       | 3013.432778                   | 0.30541545                     | 0.216797214                    |
| 414.4892086                                          | 1                                       | 1212.231877                   | 0.295284924                    | 0.20543827                     |
| 311                                                  | 0.995967742                             | 864.0635148                   | 0.3379967                      | 0.252392705                    |
| 523.7586695                                          | 0.998938429                             | 1556.509578                   | 0.256085878                    | 0.166562977                    |
| 561.5452183                                          | 0.999610187                             | 1698.480139                   | 0.258927961                    | 0.167993804                    |
| 501.5424929                                          | 0.999291785                             | 1514.623228                   | 0.295162088                    | 0.205402977                    |
| 177.2160494                                          | 1                                       | 464.5906047                   | 0.397248225                    | 0.315504646                    |
| 594.1700555                                          | 1                                       | 1966.943787                   | 0.331996055                    | 0.246700666                    |
| 613.7046908                                          | 1                                       | 1906.972748                   | 0.2883368                      | 0.197144023                    |
| 694.1920152                                          | 0.998930608                             | 2167.356817                   | 0.267813311                    | 0.177655739                    |
| 1107.486324                                          | 1                                       | 3624.649779                   | 0.255131652                    | 0.16690882                     |
| 416.6755486                                          | 1                                       | 1242.760687                   | 0.338923761                    | 0.250772835                    |
| 528.8505621                                          | 0.999794352                             | 1661.870369                   | 0.33955699                     | 0.255137094                    |
| 613.5062681                                          | 0.99855352                              | 1823.923862                   | 0.238453777                    | 0.148041394                    |
| 1624.617541                                          | 1                                       | 5517.563985                   | 0.260478912                    | 0.172699657                    |
| 809.5919185                                          | 0.997815799                             | 2548.899848                   | 0.295367528                    | 0.208318312                    |
| 566.3171697                                          | 0.993320139                             | 1682.613125                   | 0.261855379                    | 0.169894507                    |
| 237.0394265                                          | 1                                       | 649.3435483                   | 0.371575638                    | 0.287341361                    |
| 459.6327247                                          | 0.997366573                             | 1355.715111                   | 0.346671916                    | 0.261818086                    |
| 512.3423831                                          | 1                                       | 1519.904177                   | 0.265721133                    | 0.178208223                    |
| 767.2915369                                          | 0.998514011                             | 2367.712193                   | 0.238816948                    | 0.148963194                    |
| 443.5307692                                          | 1                                       | 1343.582172                   | 0.327398122                    | 0.237840975                    |
| 539.171911                                           | 1                                       | 1676.835363                   | 0.303517911                    | 0.21430165                     |
| 451.7705224                                          | 1                                       | 1349.671448                   | 0.328297012                    | 0.240055178                    |
| 995.8447653                                          | 0.999323105                             | 3150.655715                   | 0.263368285                    | 0.174769097                    |
| 654.9796748                                          | 1                                       | 2045.578122                   | 0.319613155                    | 0.235792314                    |
| 699.8688119                                          | 1                                       | 2171.520666                   | 0.259650986                    | 0.167784905                    |
| 515.7574984                                          | 0.998085514                             | 1514.595329                   | 0.277759123                    | 0.190603333                    |
| 272.1726619                                          | 1                                       | 742.4953512                   | 0.278383285                    | 0.186014155                    |
| 926.0363636                                          | 1                                       | 3017.348028                   | 0.28844947                     | 0.201237611                    |
| 623.933518                                           | 1                                       | 2031.59632                    | 0.340827185                    | 0.257054307                    |
| 211.124031                                           | 0.997674419                             | 546.673845                    | 0.358599688                    | 0.270813191                    |
| 596.8917337                                          | 1                                       | 1813.881034                   | 0.236705372                    | 0.146803203                    |
| 772.3782051                                          | 1                                       | 2362.780782                   | 0.219603235                    | 0.132735344                    |
| 273.4394619                                          | 1                                       | 754.6617511                   | 0.344715624                    | 0.260412389                    |
| 210.5899218                                          | 0.997393571                             | 548.015674                    | 0.374902129                    | 0.292990213                    |
| 171.5576471                                          | 1                                       | 457.0270863                   | 0.396226199                    | 0.31355857                     |
| 562.0666144                                          | 0.999412226                             | 1707.161532                   | 0.264913703                    | 0.176513547                    |
| 218.5289474                                          | 1                                       | 562.400213                    | 0.439046093                    | 0.369033147                    |
| 465.7832048                                          | 1                                       | 1351.195151                   | 0.288724227                    | 0.19919497                     |
| 550.9315206                                          | 1                                       | 1825.543779                   | 0.363509048                    | 0.281779947                    |
| 228.0846847                                          | 1                                       | 637.2912568                   | 0.358696222                    | 0.272734662                    |
| 451.5817143                                          | 1                                       | 1361.878706                   | 0.320404948                    | 0.235772189                    |
| 300.0990566                                          | 1                                       | 864.9738119                   | 0.37736665                     | 0.293222428                    |
| 1116.053441                                          | 0.999450952                             | 3684.70358                    | 0.251475709                    | 0.161609434                    |
| 706.2702991                                          | 0.997061966                             | 2165.259904                   | 0.258570999                    | 0.168072429                    |
| 795.5890497                                          | 1                                       | 2540.791784                   | 0.289438475                    | 0.199131965                    |
| 689.5131579                                          | 0.999620445                             | 2209.990319                   | 0.302168834                    | 0.2101076                      |
| 702.1137106                                          | 0.998775843                             | 2152.710154                   | 0.25943063                     | 0.171547458                    |
| 493.6322637                                          | 0.999349523                             | 1515.384368                   | 0.328304504                    | 0.240490866                    |
| 463.2396313                                          | 1                                       | 1381.225988                   | 0.349014228                    | 0.269316622                    |
| 460.6742671                                          | 1                                       | 1395.308353                   | 0.357321444                    | 0.272952422                    |
| 606.8697674                                          | 0.998837209                             | 1867.92636                    | 0.300091681                    | 0.211161501                    |









| wavelet.HHL_firstorder_Skewness | wavelet.HHL_firstorder_Uniformity | wavelet.HHL_firstorder_MeanAbsoluteDeviation | wavelet.HHL_firstorder_Energy | wavelet.HHL_firstorder_RobustMeanAbsoluteDeviation |
|---------------------------------|-----------------------------------|----------------------------------------------|-------------------------------|----------------------------------------------------|
| 0.344894921                     | 0.045084439                       | 133.3394015                                  | 68427586.03                   | 85.01559129                                        |
| 0.536911215                     | 0.072350939                       | 86.61356775                                  | 13627274.06                   | 52.30301857                                        |
| 0.183394321                     | 0.076761592                       | 80.55645023                                  | 18738788.2                    | 49.21229803                                        |
| 0.138297965                     | 0.072732206                       | 86.5141644                                   | 14287588.48                   | 51.51698489                                        |
| 0.186969903                     | 0.091142742                       | 62.53802774                                  | 15572602.1                    | 41.9522584                                         |
| 0.22466188                      | 0.069995409                       | 84.15237997                                  | 8163859.447                   | 54.97042214                                        |
| 0.099951076                     | 0.064946825                       | 93.48781116                                  | 94027252.85                   | 57.73126729                                        |
| 0.325839103                     | 0.088158731                       | 73.30319958                                  | 59415083.68                   | 41.93180357                                        |
| 0.101689477                     | 0.096278565                       | 62.34784756                                  | 33910085.94                   | 38.67863399                                        |
| 0.67733391                      | 0.060554272                       | 104.6600385                                  | 23081612.58                   | 62.69034284                                        |
| 0.400052396                     | 0.083067143                       | 72.61618409                                  | 14752838.51                   | 45.13953848                                        |
| 0.206515944                     | 0.069018497                       | 88.81101716                                  | 35529157.11                   | 54.2717216                                         |
| 0.221524183                     | 0.12496439                        | 57.15044703                                  | 15578161.82                   | 29.25432963                                        |
| 0.311753059                     | 0.085333584                       | 71.54304543                                  | 17494958.62                   | 43.53173028                                        |
| 0.087976869                     | 0.060810069                       | 102.6347548                                  | 41161931.44                   | 61.35452306                                        |
| 0.093200619                     | 0.068025402                       | 90.07014932                                  | 66822496.84                   | 55.26665861                                        |
| 0.079065534                     | 0.056627358                       | 104.4421496                                  | 23278146.77                   | 67.62328992                                        |
| 0.554501028                     | 0.114709111                       | 56.78726155                                  | 8903439.101                   | 32.27265216                                        |
| 0.095809896                     | 0.106645046                       | 53.57618856                                  | 6115498.651                   | 36.25119966                                        |
| 0.580910436                     | 0.062835149                       | 103.0566495                                  | 123857057.2                   | 58.70805055                                        |
| -0.038734376                    | 0.147048261                       | 41.28862721                                  | 10161831.06                   | 25.01215004                                        |
| 0.45269602                      | 0.08384776                        | 72.18130229                                  | 10484125.83                   | 45.20058883                                        |
| 0.088650415                     | 0.052047729                       | 113.3497869                                  | 22959837.02                   | 72.8353716                                         |
| 0.225927612                     | 0.076851584                       | 76.88286467                                  | 28788289.13                   | 48.45359925                                        |
| -0.105582467                    | 0.062045789                       | 103.7122734                                  | 27448037.2                    | 60.53182313                                        |
| 0.090361399                     | 0.083875177                       | 74.089124                                    | 26201733.17                   | 44.26171532                                        |
| 0.14761553                      | 0.062295159                       | 95.05284003                                  | 52942595.73                   | 60.22781685                                        |
| 0.343401282                     | 0.080916871                       | 77.55966093                                  | 33887034.56                   | 45.43506997                                        |
| 0.383970761                     | 0.07389557                        | 83.32623053                                  | 5625354.779                   | 54.59874128                                        |
| 0.417119631                     | 0.080248576                       | 76.20238731                                  | 23062778.64                   | 46.0155163                                         |
| 0.440526785                     | 0.112317548                       | 55.55018904                                  | 30690723.22                   | 32.66705166                                        |
| 0.44376811                      | 0.056660253                       | 107.243247                                   | 43681582.65                   | 66.95720093                                        |
| 0.239079419                     | 0.063378961                       | 95.45049208                                  | 55453634.33                   | 59.03136731                                        |
| 0.048604781                     | 0.050782073                       | 117.4323977                                  | 56969363.11                   | 75.10898656                                        |
| 0.299905219                     | 0.084565596                       | 70.12339587                                  | 39558326.07                   | 44.40884205                                        |
| 0.429298528                     | 0.09585934                        | 67.81223331                                  | 30027058.08                   | 38.17372286                                        |
| 0.395604253                     | 0.086608896                       | 78.44101395                                  | 54105564.08                   | 42.17912954                                        |
| 0.135120518                     | 0.067279033                       | 100.4296216                                  | 112082075.3                   | 56.00755887                                        |
| 0.480512491                     | 0.065420054                       | 90.1295144                                   | 17979952.11                   | 57.82227419                                        |
| 0.025522993                     | 0.061769666                       | 95.2971223                                   | 119158714.4                   | 60.99317162                                        |
| 0.277587154                     | 0.117179851                       | 52.9181364                                   | 14767299.58                   | 31.46279734                                        |
| 0.083005788                     | 0.059986736                       | 96.83926717                                  | 62554398.81                   | 63.54841031                                        |
| 0.409932491                     | 0.09108841                        | 68.96432964                                  | 34902410.45                   | 40.88017054                                        |
| 0.294233639                     | 0.050995583                       | 114.5341658                                  | 56093189.32                   | 75.29911722                                        |
| 0.321757068                     | 0.061362262                       | 97.92786832                                  | 22158442.17                   | 61.44859271                                        |
| 0.136792054                     | 0.067428443                       | 88.03215069                                  | 38271887.65                   | 55.62708596                                        |
| 0.273123337                     | 0.091576796                       | 66.04453992                                  | 39252107.84                   | 40.59524854                                        |
| 1.484993899                     | 0.080627069                       | 84.63793588                                  | 16709776.04                   | 46.60387684                                        |
| 0.133217116                     | 0.074008459                       | 84.25999651                                  | 11747559.91                   | 50.80047306                                        |
| 0.534180865                     | 0.092195214                       | 69.22903424                                  | 13684612.42                   | 39.79462508                                        |
| 0.461877993                     | 0.060558405                       | 100.8858378                                  | 49615348.19                   | 62.10396924                                        |
| 0.212031392                     | 0.056634225                       | 103.4498991                                  | 62600274.63                   | 67.66748451                                        |
| 0.143061631                     | 0.071853996                       | 83.34249439                                  | 58266802.84                   | 52.28404164                                        |
| 0.287441575                     | 0.119578345                       | 49.09835045                                  | 4881439.121                   | 31.26561064                                        |
| -0.874491102                    | 0.087132116                       | 79.04230276                                  | 19452024.18                   | 42.60333605                                        |
| 0.451956335                     | 0.070137541                       | 87.27790138                                  | 28147757.51                   | 53.61065182                                        |
| 0.147704557                     | 0.061581681                       | 96.39383207                                  | 67699017.94                   | 71.17996733                                        |
| -0.17500892                     | 0.053755869                       | 112.17835                                    | 81775615.07                   | 60.25587334                                        |
| 0.204481839                     | 0.089899348                       | 67.29457534                                  | 14204249.86                   | 41.72611484                                        |
| -0.028237417                    | 0.088816867                       | 68.0518954                                   | 80127856.22                   | 41.81365668                                        |
| 0.327564917                     | 0.050751005                       | 115.310291                                   | 39529516.76                   | 77.0978343                                         |
| 0.188041756                     | 0.059264122                       | 107.5564936                                  | 65545607.52                   | 62.68418689                                        |
| 0.364041445                     | 0.070930832                       | 88.85051282                                  | 93448425.55                   | 52.11766813                                        |
| 0.163396667                     | 0.061300896                       | 95.42894049                                  | 122664303.2                   | 61.75552953                                        |
| 0.814908165                     | 0.109392726                       | 56.51790258                                  | 530495.685                    | 33.62657508                                        |
| 0.264731299                     | 0.094122954                       | 66.09339539                                  | 33634830.81                   | 39.17670294                                        |
| 0.272181112                     | 0.062992821                       | 99.00107699                                  | 24650564.5                    | 59.62066561                                        |
| 0.223432549                     | 0.052233933                       | 113.2957918                                  | 145197851                     | 72.23393147                                        |
| 0.198367525                     | 0.086986647                       | 67.96084463                                  | 49893641.64                   | 42.90012887                                        |
| 0.346618608                     | 0.076457146                       | 78.97381753                                  | 34651248.57                   | 48.64327841                                        |
| -0.018455857                    | 0.08765492                        | 69.2036717                                   | 12024627.72                   | 41.79689279                                        |
| 0.271124299                     | 0.057331138                       | 109.4659681                                  | 103006234.4                   | 64.57864655                                        |
| 0.37805759                      | 0.079379981                       | 87.13910564                                  | 39007805.55                   | 46.80962284                                        |
| 0.208803973                     | 0.058827192                       | 102.0382775                                  | 42764653.46                   | 64.69569603                                        |
| 0.155431744                     | 0.06285289                        | 95.95708045                                  | 52869916.74                   | 60.05359035                                        |
| 0.261097197                     | 0.06763822                        | 86.03771415                                  | 16830247                      | 57.15415473                                        |
| 0.335642658                     | 0.069270989                       | 93.26453643                                  | 45244862.52                   | 53.51583645                                        |
| 0.200059362                     | 0.093579613                       | 69.64493883                                  | 9995109.55                    | 39.82039017                                        |
| 0.490569368                     | 0.101725587                       | 58.36520742                                  | 10630652.61                   | 37.37224201                                        |
| -0.000662961                    | 0.052630078                       | 111.6446341                                  | 51323207.82                   | 72.39692982                                        |
| 0.308980304                     | 0.044743576                       | 134.4474528                                  | 64586240.08                   | 86.10772693                                        |
| 0.290288912                     | 0.093540634                       | 66.00584702                                  | 15279512.38                   | 39.49471838                                        |
| 0.336742254                     | 0.108204748                       | 57.69828329                                  | 21799012.13                   | 34.28902312                                        |
| 0.110824129                     | 0.11956451                        | 48.62312705                                  | 12872539.77                   | 31.38813683                                        |
| 0.364027078                     | 0.058373052                       | 100.6808163                                  | 43009718.76                   | 65.77613434                                        |
| 1.242432411                     | 0.144485953                       | 44.720189                                    | 7189240.113                   | 25.11972723                                        |
| 0.086061683                     | 0.071345103                       | 84.83060446                                  | 32081994.15                   | 52.50450638                                        |
| -0.53927948                     | 0.096683356                       | 66.54162855                                  | 26203760.41                   | 37.80096048                                        |
| 0.156153964                     | 0.100528345                       | 60.1945458                                   | 10168731.65                   | 37.06112538                                        |
| 0.382394084                     | 0.078547295                       | 80.89489773                                  | 28147762                      | 46.85108612                                        |
| 0.609263658                     | 0.117360693                       | 54.13141041                                  | 8452386.647                   | 31.6591847                                         |
| 0.284798912                     | 0.05694507                        | 106.3142725                                  | 50350187.44                   | 66.07459491                                        |
| 0.18752938                      | 0.05977403                        | 98.89976003                                  | 90914586.77                   | 63.27609162                                        |
| 0.127157112                     | 0.070368228                       | 85.70121125                                  | 45368006.31                   | 53.25444568                                        |
| 0.255965759                     | 0.07789163                        | 77.06871128                                  | 49075046.55                   | 48.14051974                                        |
| 0.23371231                      | 0.059272162                       | 102.5146202                                  | 68126169.71                   | 63.21349483                                        |
| 0.219425674                     | 0.084805738                       | 71.77026835                                  | 28288947.79                   | 43.92815459                                        |
| 0.191138366                     | 0.094763863                       | 72.92454949                                  | 12543408.82                   | 39.5289491                                         |
| 1.729588392                     | 0.097329331                       | 66.87702311                                  | 9061675.624                   | 38.00446338                                        |
| 0.331381307                     | 0.073731018                       | 83.46239394                                  | 79675064.88                   | 50.14445789                                        |



| wavelet.HHL_firstorder_Median | wavelet.HHL_firstorder_TotalEnergy | wavelet.HHL_firstorder_Maximum | wavelet.HHL_firstorder_RootMeanSquared | wavelet.HHL_firstorder_90Percentile | wavelet.HHL_firstorder_Minimum |
|-------------------------------|------------------------------------|--------------------------------|----------------------------------------|-------------------------------------|--------------------------------|
| -5.587861072                  | 1847544823                         | 1011.661248                    | 179.5737781                            | 226.3641013                         | -680.5263972                   |
| -6.49437256                   | 367936399.6                        | 580.8492167                    | 120.7254102                            | 152.5581454                         | -540.8493632                   |
| -4.099202928                  | 505947281.4                        | 396.8369069                    | 110.524376                             | 139.6937054                         | -395.2354486                   |
| 1.348190388                   | 385764889                          | 603.6884959                    | 120.9294798                            | 135.9390792                         | -484.1320138                   |
| -0.655042809                  | 420640256.8                        | 413.9066606                    | 81.09419079                            | 105.6032613                         | -305.7986517                   |
| -8.582645468                  | 220424205.1                        | 483.3386278                    | 111.218182                             | 123.3488016                         | -343.4396787                   |
| 0.698231626                   | 2538735827                         | 709.7978575                    | 128.9924288                            | 153.8168537                         | -623.6930637                   |
| -0.980783373                  | 1604207259                         | 689.4646716                    | 107.8506861                            | 101.3803647                         | -574.0636945                   |
| -2.813323469                  | 915572320.3                        | 726.5137882                    | 86.36737687                            | 96.70256618                         | -562.7686009                   |
| -8.862941                     | 623203539.6                        | 728.8316579                    | 146.7356637                            | 171.6129075                         | -477.8939549                   |
| -3.376868134                  | 398326639.8                        | 426.2681124                    | 98.90929891                            | 120.5045447                         | -328.1264204                   |
| -3.370036552                  | 959287241.9                        | 736.7593768                    | 124.152934                             | 138.2982291                         | -663.6731676                   |
| 1.821903615                   | 420610369.1                        | 620.5106702                    | 91.3452453                             | 87.32754237                         | -564.2481004                   |
| -0.80218124                   | 472363882.8                        | 573.3944807                    | 100.9418622                            | 110.0103733                         | -440.3112932                   |
| -1.298481435                  | 1111372149                         | 657.971037                     | 144.0379854                            | 158.6459364                         | -665.2685888                   |
| -3.897305688                  | 1804207414                         | 571.3318114                    | 123.5727447                            | 136.7703436                         | -653.0481086                   |
| 2.089514359                   | 620590962.9                        | 596.8104006                    | 139.6278458                            | 169.5767823                         | -554.5986987                   |
| -1.858332089                  | 240392855.7                        | 561.3647691                    | 84.97621012                            | 76.39239836                         | -502.7739491                   |
| -2.638648438                  | 165118463.6                        | 287.4147628                    | 68.64020804                            | 85.26289593                         | -254.5276664                   |
| -1.399489303                  | 3344140543                         | 1081.927393                    | 154.3478093                            | 145.0188659                         | -797.6940849                   |
| -0.285009602                  | 274369438.7                        | 295.1768925                    | 57.96890433                            | 61.60513182                         | -296.3735177                   |
| -5.050540072                  | 283071397.5                        | 473.8110435                    | 98.57241348                            | 116.071646                          | -525.4420737                   |
| -6.112709307                  | 619915599.5                        | 506.2849888                    | 149.7388254                            | 193.8426158                         | -539.1497944                   |
| 1.387715098                   | 777283806.4                        | 558.1330509                    | 104.287188                             | 125.5478568                         | -417.9005119                   |
| -3.55589623                   | 741097004.5                        | 681.1528956                    | 146.8390091                            | 145.6743735                         | -557.4215944                   |
| 0.922476224                   | 707446795.5                        | 517.0987735                    | 105.167725                             | 116.4157345                         | -533.0888173                   |
| -0.059345553                  | 1429450085                         | 619.6406612                    | 127.9675228                            | 153.5691947                         | -455.754268                    |
| -1.021514265                  | 914949933.2                        | 684.6510318                    | 110.7656105                            | 120.615094                          | -450.0863309                   |
| 0.916252051                   | 151884579                          | 678.7469117                    | 112.1814882                            | 125.6329067                         | -481.5578665                   |
| -4.093794186                  | 622695023.2                        | 670.610553                     | 105.9633294                            | 121.2924758                         | -406.0212768                   |
| 1.12058638                    | 828649526.9                        | 550.7452633                    | 80.31401594                            | 87.90441094                         | -399.6292273                   |
| -4.682735649                  | 1179402731                         | 670.3393201                    | 145.3011117                            | 186.5861585                         | -553.9594438                   |
| -0.859941517                  | 1497248127                         | 666.7722571                    | 131.0481772                            | 163.5912847                         | -552.6625585                   |
| -5.223813487                  | 1538172804                         | 513.4906992                    | 155.6993326                            | 196.9361614                         | -544.0766944                   |
| -0.630367727                  | 1068074804                         | 594.5189145                    | 94.77532837                            | 112.3129736                         | -383.4058717                   |
| -2.336976023                  | 810730568.1                        | 518.1200263                    | 100.061765                             | 97.11076542                         | -483.2662479                   |
| -1.058321623                  | 1460850230                         | 740.5970599                    | 120.5844008                            | 120.5844008                         | -801.1631931                   |
| 0.310810188                   | 3026216034                         | 1045.383003                    | 147.3673087                            | 161.719623                          | -796.7750685                   |
| -3.323810022                  | 485458707                          | 589.7286734                    | 120.9042896                            | 144.2111471                         | -417.3532588                   |
| -1.091920611                  | 3217285288                         | 648.0216548                    | 128.0252696                            | 153.3976549                         | -675.5608968                   |
| -0.721545113                  | 398717088.7                        | 482.6651107                    | 75.45109672                            | 84.82049355                         | -345.5637717                   |
| -2.280802335                  | 1689868768                         | 545.7372129                    | 127.1867416                            | 158.889921                          | -502.4453475                   |
| -2.740955899                  | 942365082.1                        | 531.3941172                    | 97.7468734                             | 112.3005329                         | -478.7656556                   |
| -6.981020272                  | 1514516112                         | 625.8722669                    | 150.1515704                            | 185.5949523                         | -482.8806768                   |
| -1.551924341                  | 598277938.5                        | 511.1344921                    | 131.6752602                            | 170.1289187                         | -455.5418793                   |
| 0.192428477                   | 1033340967                         | 514.0744726                    | 118.0779398                            | 147.4284031                         | -531.9925501                   |
| -1.025254352                  | 105906912                          | 707.2217852                    | 92.75852866                            | 103.0396188                         | -552.7847816                   |
| -3.857204692                  | 451163952.9                        | 1136.778371                    | 138.5084397                            | 115.6810168                         | -719.816342                    |
| -4.615415539                  | 37184117.5                         | 503.6614441                    | 117.4922049                            | 128.7854614                         | -451.392282                    |
| -0.406422562                  | 369484535.2                        | 573.1384582                    | 100.6069319                            | 105.7664947                         | -393.6091966                   |
| -2.735433257                  | 1339614401                         | 849.5325826                    | 138.9715718                            | 170.3423221                         | -500.0428656                   |
| -1.585495511                  | 1690207415                         | 595.6707198                    | 136.272663                             | 171.670394                          | -525.3400802                   |
| -2.540761234                  | 1573203677                         | 671.0526269                    | 113.6386456                            | 129.9286015                         | -509.2496127                   |
| -0.964397299                  | 131798856.3                        | 304.0279571                    | 66.49506302                            | 77.04325307                         | -509.8892769                   |
| -2.631815011                  | 525204652.9                        | 561.2201777                    | 120.9362729                            | 98.09208129                         | -581.5951245                   |
| -0.598538752                  | 759989452.9                        | 656.4718409                    | 120.1446938                            | 144.1141316                         | -533.1420181                   |
| -2.816589508                  | 1827873484                         | 728.1793151                    | 129.3695065                            | 159.1401037                         | -604.9846947                   |
| -3.288992057                  | 2207941607                         | 675.5753989                    | 153.7798437                            | 178.2402686                         | -780.88165                     |
| -0.078018551                  | 383514746.3                        | 479.1319521                    | 92.83902011                            | 111.8574856                         | -458.6233649                   |
| -1.337892007                  | 2163452118                         | 499.0536708                    | 93.68717815                            | 108.9226011                         | -540.6016818                   |
| -12.54454824                  | 1067296952                         | 602.7190775                    | 149.6116467                            | 189.8578635                         | -572.5448711                   |
| -4.522929943                  | 1769731403                         | 801.8781323                    | 156.6809391                            | 157.2491731                         | -962.7215676                   |
| -3.015001681                  | 2523107490                         | 731.9826501                    | 127.0527939                            | 136.9684274                         | -654.5523987                   |
| -1.262010062                  | 3311936187                         | 797.965912                     | 126.8516552                            | 155.7391501                         | -548.4240957                   |
| 1.686235857                   | 143221383.5                        | 632.3100006                    | 81.942366594                           | 89.76998488                         | -334.7653609                   |
| -2.479167357                  | 908140431.8                        | 503.0264659                    | 93.32295651                            | 104.5089981                         | -480.8489981                   |
| -6.763995219                  | 66565241.6                         | 687.6487458                    | 137.4911166                            | 161.9077166                         | -513.4781245                   |
| -1.224146918                  | 3920341976                         | 1151.885631                    | 152.4193431                            | 183.5336897                         | -642.4426482                   |
| -2.496672262                  | 1347128324                         | 472.3745104                    | 92.29644843                            | 105.5452476                         | -489.4748066                   |
| -4.140976347                  | 935583711.4                        | 644.1834887                    | 109.3478513                            | 117.7862177                         | -534.9788402                   |
| -1.093503288                  | 324664948.6                        | 394.164097                     | 96.21244346                            | 116.1914508                         | -492.9256548                   |
| -4.764870942                  | 2781168330                         | 807.6551229                    | 154.9541134                            | 167.8413371                         | -731.6879428                   |
| -0.156243655                  | 1053210750                         | 671.4717106                    | 130.828872                             | 135.1289233                         | -595.8188005                   |
| -6.057220611                  | 1154645643                         | 699.9691789                    | 137.5892056                            | 162.3720381                         | -617.1327537                   |
| -3.057778853                  | 1427487752                         | 572.8675234                    | 129.9459593                            | 168.3276276                         | -505.2165232                   |
| -3.995849696                  | 454416668.9                        | 486.6229681                    | 111.9873549                            | 133.294414                          | -362.0532562                   |
| -1.367288628                  | 1221611288                         | 819.3921339                    | 137.4172425                            | 139.6871101                         | -723.0067256                   |
| -3.019732622                  | 269867957.9                        | 513.4428817                    | 102.1435681                            | 101.8247386                         | -584.6084353                   |
| -3.870125047                  | 287027620.5                        | 374.8788187                    | 78.91566176                            | 88.49842503                         | -318.9172604                   |
| -1.494604358                  | 1385726611                         | 374.5886744                    | 148.129578                             | 183.0821814                         | -560.8045347                   |
| -5.617308837                  | 1743828482                         | 1011.661248                    | 180.1990967                            | 227.0384784                         | -641.3331013                   |
| -1.256528682                  | 412546834.2                        | 439.0674213                    | 92.15929663                            | 106.9846508                         | -373.7673254                   |
| 0.40741973                    | 588573327.6                        | 448.6484591                    | 81.66029533                            | 88.14905397                         | -312.1853997                   |
| -1.573720765                  | 347538573.7                        | 281.6628512                    | 64.72183783                            | 75.8761297                          | -287.2263076                   |
| -3.891102646                  | 1161262406                         | 316526049                      | 132.7936784                            | 175.0428125                         | -543.6533643                   |
| -1.026214089                  | 194109483                          | 525.6869425                    | 68.50339757                            | 66.3762024                          | -314.7757614                   |
| -1.339119268                  | 866213842.1                        | 561.9611042                    | 115.9809031                            | 136.3713139                         | -483.3608179                   |
| -1.785098368                  | 707501531.2                        | 557.4343419                    | 97.75704939                            | 87.67530371                         | -550.1643607                   |
| -1.998897842                  | 274555754.4                        | 408.0814126                    | 83.34179593                            | 89.8112707                          | -348.8712349                   |
| -1.437897499                  | 759989573.9                        | 648.2563353                    | 117.8988099                            | 112.4315318                         | -495.3496441                   |
| -2.0440247                    | 228214439.5                        | 526.5134558                    | 80.51019563                            | 82.06500034                         | -397.2944500                   |
| 0.358887344                   | 1359455061                         | 739.7915145                    | 145.3883699                            | 177.3406777                         | -796.0405688                   |
| -5.916882729                  | 2544693843                         | 651.9852809                    | 132.4421372                            | 158.7343423                         | -605.0034878                   |
| -2.599492418                  | 1224936170                         | 634.861905                     | 117.2513569                            | 138.8207717                         | -544.4466107                   |
| -0.220859807                  | 1325026257                         | 625.2991584                    | 106.1905614                            | 121.3254593                         | -603.3165492                   |
| -4.912135803                  | 1839406582                         | 790.2756002                    | 141.0967412                            | 163.7510013                         | -617.347192                    |
| -2.048000029                  | 763801590.3                        | 600.0242339                    | 100.2109025                            | 111.6073369                         | -502.8944463                   |
| -0.036051413                  | 338672038.2                        | 515.5967589                    | 109.4547083                            | 121.9149427                         | -477.9207056                   |
| -1.635381054                  | 244665241.8                        | 903.6482423                    | 104.2368385                            | 93.59894905                         | -499.071229                    |
| 2.415325463                   | 2151226752                         | 737.2972666                    | 117.4688877                            | 133.2637377                         | -557.0059401                   |

| wavelet.HHL_firstorder_Entropy | wavelet.HHL_firstorder_StandardDeviation | wavelet.HHL_firstorder_Range | wavelet.HHL_firstorder_Variance | wavelet.HHL_firstorder_10Percentile | wavelet.HHL_firstorder_Kurtosis |
|--------------------------------|------------------------------------------|------------------------------|---------------------------------|-------------------------------------|---------------------------------|
| 4.81813665                     | 179.5690442                              | 1692.187645                  | 32245.04164                     | -202.731943                         | 4.821861745                     |
| 4.196784845                    | 120.7151338                              | 1121.69858                   | 14572.14353                     | -135.3231088                        | 5.308579566                     |
| 4.105624327                    | 110.5118064                              | 792.0723556                  | 12212.85935                     | -126.5516795                        | 4.132688543                     |
| 4.200825246                    | 120.9286954                              | 1087.82051                   | 14623.74937                     | -137.4397598                        | 5.063199202                     |
| 3.7274923                      | 81.06977416                              | 719.7053123                  | 6572.308282                     | -97.00686803                        | 3.899561861                     |
| 4.134340753                    | 111.0416739                              | 826.7783064                  | 12330.25335                     | -142.7150947                        | 4.226723244                     |
| 4.336494805                    | 128.9637226                              | 1333.491264                  | 16631.64175                     | -142.8191289                        | 5.105960212                     |
| 3.979267035                    | 107.8277331                              | 1263.528366                  | 11626.82003                     | -122.0301287                        | 7.333922448                     |
| 3.754137033                    | 86.33610917                              | 1289.282389                  | 7453.923747                     | -98.24763299                        | 6.509248517                     |
| 4.45630789                     | 146.7040394                              | 1206.725613                  | 21522.07518                     | -155.8870113                        | 5.707136872                     |
| 3.955853211                    | 98.89358348                              | 754.3945328                  | 9779.940853                     | -114.3407062                        | 4.451902744                     |
| 4.253825412                    | 124.0841534                              | 1400.432544                  | 15396.87714                     | -143.4523822                        | 6.126881757                     |
| 3.590728515                    | 91.31541742                              | 1184.758771                  | 8338.505458                     | -85.94684417                        | 10.27111623                     |
| 3.944363941                    | 100.9414082                              | 1013.705774                  | 10189.16789                     | -109.5685893                        | 6.593646343                     |
| 4.466587839                    | 143.9938614                              | 1323.239626                  | 20734.23211                     | -171.7533172                        | 5.17041623                      |
| 4.276645054                    | 123.4259292                              | 1104.37992                   | 15233.96                        | -157.2874671                        | 4.436709781                     |
| 4.463113188                    | 139.6156562                              | 1151.409099                  | 19492.53147                     | -156.5989583                        | 4.757945823                     |
| 3.583202068                    | 84.94953942                              | 1064.138718                  | 7216.424248                     | -95.25846942                        | 8.894946474                     |
| 3.492658584                    | 68.63355972                              | 541.9424269                  | 4710.56552                      | -87.99986379                        | 3.464377857                     |
| 4.45911451                     | 154.3301749                              | 1879.621478                  | 23817.80288                     | -163.2858669                        | 9.484139301                     |
| 3.166174273                    | 57.96416804                              | 591.5504102                  | 3359.844776                     | -65.73993613                        | 5.939985044                     |
| 3.943877363                    | 98.56886975                              | 826.2531173                  | 9715.822083                     | -107.8584487                        | 4.984814252                     |
| 4.573872438                    | 149.7302916                              | 1045.434783                  | 22419.16023                     | -182.4742463                        | 3.69768123                      |
| 4.054944854                    | 104.2436318                              | 976.0335628                  | 10866.73477                     | -122.0691119                        | 4.716028319                     |
| 4.448870389                    | 146.5012469                              | 1238.57449                   | 21462.61533                     | -188.2879012                        | 5.061573934                     |
| 3.998729332                    | 105.1583802                              | 1050.187591                  | 11058.28492                     | -114.8141121                        | 6.050696795                     |
| 4.35525957                     | 127.9655821                              | 1075.394929                  | 16375.1902                      | -155.1053489                        | 4.340305988                     |
| 4.070127847                    | 110.7617419                              | 1134.737363                  | 12268.16346                     | -128.8098891                        | 6.166704865                     |
| 4.071016982                    | 112.1786995                              | 1160.304778                  | 12584.06061                     | -134.4022625                        | 6.857460682                     |
| 4.034040959                    | 105.9487491                              | 1076.63183                   | 11225.13743                     | -125.0267137                        | 5.422747555                     |
| 3.592701278                    | 80.28145632                              | 944.3744906                  | 6445.11223                      | -82.63359682                        | 7.219510297                     |
| 4.510578229                    | 145.268771                               | 1224.298764                  | 21103.01582                     | -165.0270724                        | 4.437404258                     |
| 4.365420668                    | 131.0206642                              | 1219.434816                  | 17166.41444                     | -144.7947357                        | 4.893040186                     |
| 4.633277859                    | 155.6752071                              | 1057.567664                  | 24234.7701                      | -200.7044267                        | 3.519382976                     |
| 3.914491057                    | 94.77508583                              | 977.9247862                  | 8982.316894                     | -112.3250801                        | 4.907388868                     |
| 3.864841497                    | 100.0133116                              | 1001.386274                  | 10002.6625                      | -114.0916803                        | 5.678064581                     |
| 4.052107525                    | 120.582407                               | 1541.760253                  | 14540.11689                     | -119.107969                         | 8.818056215                     |
| 4.427692812                    | 147.3658024                              | 1842.158072                  | 21716.67973                     | -167.0903412                        | 6.287729213                     |
| 4.249213323                    | 120.9025317                              | 1007.081932                  | 14617.42218                     | -140.6447368                        | 4.960578513                     |
| 4.358234826                    | 128.0223506                              | 1323.582552                  | 16389.72225                     | -153.8313643                        | 4.706338569                     |
| 3.523842027                    | 75.4510378                               | 828.2288825                  | 5692.859106                     | -83.4153551                         | 6.515240084                     |
| 4.368726226                    | 127.1787008                              | 1048.18256                   | 16174.42195                     | -156.9005475                        | 3.858329761                     |
| 3.894209786                    | 97.74309391                              | 1010.159773                  | 9553.712407                     | -109.3106962                        | 5.798917858                     |
| 4.600383953                    | 150.1511179                              | 1108.752944                  | 22545.35821                     | -183.9102311                        | 3.89743981                      |
| 4.373917679                    | 131.5859914                              | 966.6763714                  | 17314.87313                     | -157.3131469                        | 4.051248376                     |
| 4.237116918                    | 118.0439013                              | 1046.067023                  | 13934.36264                     | -139.2007559                        | 4.101852463                     |
| 3.835352608                    | 92.75819831                              | 1260.006567                  | 8604.083354                     | -100.6193953                        | 7.181955545                     |
| 4.089463186                    | 138.4968947                              | 1856.594713                  | 19181.38984                     | -122.7027793                        | 16.95413331                     |
| 4.145459903                    | 117.4617997                              | 955.0537261                  | 13797.2744                      | -131.4611676                        | 5.270274412                     |
| 3.89295017                     | 100.5752937                              | 966.7476549                  | 10115.38971                     | -105.5833219                        | 6.833797104                     |
| 4.432760221                    | 138.9102896                              | 1349.575448                  | 19296.06856                     | -156.3657737                        | 5.530626488                     |
| 4.456371119                    | 136.242025                               | 1121.0108                    | 18561.88938                     | -162.3250573                        | 4.028904405                     |
| 4.166513853                    | 113.6171844                              | 1180.30224                   | 12908.86458                     | -136.0305995                        | 5.051179903                     |
| 3.400923494                    | 66.49368779                              | 594.9172339                  | 4421.410516                     | -76.78747081                        | 5.051118408                     |
| 4.021542249                    | 120.2650845                              | 1142.815302                  | 14463.69054                     | -136.0591191                        | 7.563572017                     |
| 4.213007445                    | 119.9904132                              | 1209.613859                  | 14397.69926                     | -123.3062453                        | 5.274581743                     |
| 4.36904019                     | 129.3682544                              | 1333.70401                   | 16736.14524                     | -158.775281                         | 4.376271251                     |
| 4.586868874                    | 153.7186425                              | 1456.457049                  | 23629.42104                     | -177.8604058                        | 5.077195907                     |
| 3.852276763                    | 92.75399267                              | 937.755317                   | 8603.303155                     | -97.1920386                         | 5.680648661                     |
| 3.890541205                    | 93.6633365                               | 1039.655353                  | 8772.820605                     | -114.6456525                        | 4.762135479                     |
| 4.58292002                     | 149.5904846                              | 1175.263949                  | 22377.31308                     | -174.6270957                        | 3.875512939                     |
| 4.521203888                    | 156.6369342                              | 1764.5997                    | 24535.12915                     | -173.7765417                        | 7.22278363                      |
| 4.263745866                    | 127.0328122                              | 1386.535049                  | 16137.33536                     | -144.0589284                        | 6.159776849                     |
| 4.354726827                    | 126.8424723                              | 1346.390008                  | 16089.01279                     | -147.8404967                        | 4.378880153                     |
| 3.589984095                    | 81.94157885                              | 967.0753616                  | 6714.422345                     | -88.99672973                        | 10.56200385                     |
| 3.842180671                    | 93.30619386                              | 993.8754639                  | 8706.045812                     | -109.2942229                        | 5.537932111                     |
| 4.402805497                    | 137.4837355                              | 1201.12687                   | 18901.77752                     | -155.8800915                        | 4.916805587                     |
| 4.60470814                     | 152.4172924                              | 1794.328279                  | 23231.03103                     | -182.4894188                        | 4.823426324                     |
| 3.878904034                    | 92.28159604                              | 961.849317                   | 8515.892967                     | -109.2663092                        | 4.917049588                     |
| 4.086591894                    | 109.3323906                              | 1179.162329                  | 11953.57164                     | -124.088492                         | 5.76722483                      |
| 3.908347372                    | 96.21187312                              | 887.0897519                  | 9256.724529                     | -111.5575342                        | 4.977308386                     |
| 4.563758057                    | 154.8962469                              | 1539.343066                  | 23992.84731                     | -180.7668512                        | 5.37957862                      |
| 4.197197831                    | 130.8041361                              | 1267.290511                  | 17109.72202                     | -135.151753                         | 6.345960556                     |
| 4.437607775                    | 137.5861094                              | 1317.101933                  | 18929.9375                      | -161.2461557                        | 4.705394699                     |
| 4.364426373                    | 129.9365761                              | 1078.084047                  | 16883.51381                     | -150.7911116                        | 4.194016996                     |
| 4.171775928                    | 111.9792274                              | 848.6762243                  | 12539.34736                     | -139.2299825                        | 3.766035465                     |
| 4.317097268                    | 137.40903                                | 1542.398859                  | 18881.24152                     | -143.4048407                        | 7.703181875                     |
| 3.877596509                    | 102.1287667                              | 1098.051317                  | 10430.285                       | -116.5686605                        | 7.370552973                     |
| 3.637938266                    | 78.91503436                              | 693.7960792                  | 6227.582648                     | -92.67917862                        | 5.409077666                     |
| 4.564968448                    | 148.1268717                              | 1335.393209                  | 21941.57012                     | -175.2979598                        | 4.308157529                     |
| 4.822378006                    | 180.1986961                              | 1652.994349                  | 32471.57007                     | -208.3386075                        | 4.549436041                     |
| 3.833783511                    | 92.15891155                              | 812.8347468                  | 8493.264978                     | -108.123306                         | 5.058464447                     |
| 3.64258651                     | 81.65990266                              | 760.8338589                  | 6668.339703                     | -96.52026548                        | 5.692692243                     |
| 3.389012915                    | 64.72172371                              | 568.8891588                  | 4188.901517                     | -75.67084175                        | 4.241828372                     |
| 4.408853144                    | 132.7067161                              | 1086.581369                  | 17611.07251                     | -152.2011921                        | 3.892772779                     |
| 3.265776438                    | 68.50255627                              | 840.4627038                  | 4692.600216                     | -71.01717638                        | 13.01482903                     |
| 4.184506573                    | 115.9809005                              | 1045.321922                  | 13451.56928                     | -131.2792064                        | 4.853962338                     |
| 3.834794969                    | 97.44037923                              | 1107.598703                  | 9494.627505                     | -114.6838274                        | 7.105760627                     |
| 3.694602856                    | 83.29418928                              | 756.9526476                  | 6937.921967                     | -97.21868406                        | 5.406234656                     |
| 4.116172525                    | 117.8715447                              | 1143.605979                  | 13893.70105                     | -133.2487336                        | 7.152937899                     |
| 3.525019499                    | 80.50532061                              | 923.8079064                  | 6481.106646                     | -84.21272917                        | 9.662544479                     |
| 4.502772984                    | 145.3480724                              | 1535.832083                  | 21126.06215                     | -169.725163                         | 5.194285067                     |
| 4.407888742                    | 132.4315916                              | 1256.988769                  | 17538.12644                     | -158.9145718                        | 4.42295084                      |
| 4.202876806                    | 117.2465875                              | 1289.308516                  | 13746.76228                     | -134.6002782                        | 5.205904798                     |
| 4.053779325                    | 106.1842726                              | 1228.615708                  | 11275.09975                     | -118.4804891                        | 5.995573707                     |
| 4.463259371                    | 141.0703645                              | 1407.622792                  | 19900.84773                     | -163.2471664                        | 5.004375861                     |
| 3.957459282                    | 100.1971577                              | 1102.91868                   | 10039.47041                     | -114.790857                         | 6.002964564                     |
| 3.947992287                    | 109.4511768                              | 993.5174644                  | 11979.5601                      | -110.0101097                        | 6.493077461                     |
| 3.798773366                    | 104.2368082                              | 1402.719471                  | 10865.31219                     | -104.7379254                        | 16.89701531                     |
| 4.176961445                    | 117.4221198                              | 1294.303207                  | 13787.95422                     | -127.9248163                        | 6.043486226                     |

| wavelet.HHL_firstrder_Mean | wavelet.HHL_glrIm_ShortRunLowGrayLevelEmphasis | wavelet.HHL_glrIm_GrayLevelVariance | wavelet.HHL_glrIm_LowGrayLevelRunEmphasis | wavelet.HHL_glrIm_GrayLevelNonUniformityNormalized |
|----------------------------|------------------------------------------------|-------------------------------------|-------------------------------------------|----------------------------------------------------|
| 1.303888961                | 0.002158838                                    | 52.78205626                         | 0.002198057                               | 0.044267531                                        |
| 1.575161224                | 0.003337029                                    | 24.24343675                         | 0.003426191                               | 0.069517045                                        |
| -1.666831696               | 0.005969455                                    | 20.57733421                         | 0.006177424                               | 0.07282713                                         |
| -0.435559811               | 0.004057818                                    | 24.63067081                         | 0.00418352                                | 0.069635554                                        |
| 1.98984859                 | 0.007193455                                    | 11.07472301                         | 0.007517648                               | 0.08861882                                         |
| -6.263438316               | 0.01005093                                     | 20.53509895                         | 0.010258719                               | 0.068390648                                        |
| 2.721201266                | 0.002008456                                    | 27.688571                           | 0.002078876                               | 0.062685011                                        |
| -2.224962951               | 0.002261197                                    | 19.7737205                          | 0.00236545                                | 0.083943155                                        |
| -2.3237986                 | 0.002115474                                    | 12.66943151                         | 0.002224686                               | 0.092266697                                        |
| 3.04628261                 | 0.004608467                                    | 35.59918855                         | 0.004717329                               | 0.058810593                                        |
| 1.763109998                | 0.00737024                                     | 16.42099957                         | 0.007636452                               | 0.080193264                                        |
| -4.132055835               | 0.001936692                                    | 25.73671238                         | 0.001992535                               | 0.06684783                                         |
| 2.334176761                | 0.002522196                                    | 14.76108502                         | 0.00267393                                | 0.113432647                                        |
| -0.302732306               | 0.004463752                                    | 17.19209398                         | 0.004628627                               | 0.08243314                                         |
| -3.564987835               | 0.002237018                                    | 34.48347882                         | 0.002289559                               | 0.058756786                                        |
| -6.021895744               | 0.002710721                                    | 25.40060652                         | 0.002806795                               | 0.065556746                                        |
| 1.844953781                | 0.003392752                                    | 32.07317328                         | 0.003459689                               | 0.055648883                                        |
| -2.128858459               | 0.003122302                                    | 12.49595154                         | 0.003275751                               | 0.108414992                                        |
| -0.955321652               | 0.010032642                                    | 7.962251773                         | 0.010523084                               | 0.103357371                                        |
| -2.333099005               | 0.001508554                                    | 39.6701767                          | 0.001549795                               | 0.060821915                                        |
| -0.741008244               | 0.007739014                                    | 5.958349981                         | 0.008383271                               | 0.136839651                                        |
| -0.835832254               | 0.006289754                                    | 16.36439237                         | 0.006508088                               | 0.08068278                                         |
| -1.598625795               | 0.00368295                                     | 36.5599726                          | 0.003755786                               | 0.051143193                                        |
| 3.013769153                | 0.004448052                                    | 18.13784783                         | 0.00461352                                | 0.07445541                                         |
| -9.95385621                | 0.00358761                                     | 35.89990405                         | 0.003674969                               | 0.059785652                                        |
| 1.401949618                | 0.0030619                                      | 18.56688821                         | 0.003188407                               | 0.080484364                                        |
| -0.704764425               | 0.004101097                                    | 27.19355322                         | 0.00422304                                | 0.060486829                                        |
| -0.925751478               | 0.003956499                                    | 20.80373741                         | 0.004100887                               | 0.07716588                                         |
| -0.791007581               | 0.00509066                                     | 20.89395169                         | 0.005182512                               | 0.072623967                                        |
| -1.757769818               | 0.004687989                                    | 18.78372371                         | 0.004858343                               | 0.077275676                                        |
| 2.286684608                | 0.004294051                                    | 11.19729231                         | 0.004564972                               | 0.105905765                                        |
| 3.065493897                | 0.00269152                                     | 34.91874574                         | 0.002765941                               | 0.055059036                                        |
| 2.68520228                 | 0.002616905                                    | 27.68852547                         | 0.002694607                               | 0.061568441                                        |
| -2.740817236               | 0.004098286                                    | 39.80964669                         | 0.004211637                               | 0.049355226                                        |
| -0.214413651               | 0.005228486                                    | 15.09214132                         | 0.005428178                               | 0.081609681                                        |
| -3.113568702               | 0.003046607                                    | 17.13753067                         | 0.00319583                                | 0.090679491                                        |
| 0.693414318                | 0.001230189                                    | 24.80625241                         | 0.001282342                               | 0.081787984                                        |
| -0.666300631               | 0.001268968                                    | 36.67557322                         | 0.00132097                                | 0.062705755                                        |
| 0.651972231                | 0.006319495                                    | 24.15412304                         | 0.006453097                               | 0.064145297                                        |
| -0.864525984               | 0.001537355                                    | 27.20053825                         | 0.001586228                               | 0.060208038                                        |
| -0.094290932               | 0.006217197                                    | 9.876297372                         | 0.006609723                               | 0.109824348                                        |
| -1.430136095               | 0.003116492                                    | 26.749411                           | 0.00319971                                | 0.058732793                                        |
| 0.859564986                | 0.002920568                                    | 16.1880596                          | 0.00306401                                | 0.086153361                                        |
| -0.368634131               | 0.00451194                                     | 37.05100589                         | 0.004594086                               | 0.050113225                                        |
| 4.847784806                | 0.004346006                                    | 28.52261313                         | 0.00445794                                | 0.059809984                                        |
| 2.835000884                | 0.002613432                                    | 23.05946503                         | 0.002697214                               | 0.065657259                                        |
| 0.247558871                | 0.002135157                                    | 14.66320809                         | 0.00224156                                | 0.087916834                                        |
| 1.788302469                | 0.0025536                                      | 32.50807895                         | 0.00260957                                | 0.077664421                                        |
| -2.672793643               | 0.005126019                                    | 23.10895254                         | 0.005247478                               | 0.071722644                                        |
| 2.522902279                | 0.005835866                                    | 17.19458551                         | 0.006046985                               | 0.087839826                                        |
| 4.126647801                | 0.003423919                                    | 31.94385184                         | 0.003507156                               | 0.058947107                                        |
| 2.889517965                | 0.002841319                                    | 30.57866816                         | 0.002911912                               | 0.055558189                                        |
| -2.208434556               | 0.002909967                                    | 21.51793163                         | 0.003010944                               | 0.069749992                                        |
| 0.427656735                | 0.008338651                                    | 7.648489397                         | 0.008807593                               | 0.114317744                                        |
| -12.7236611                | 0.003277977                                    | 24.6818788                          | 0.00337231                                | 0.082882962                                        |
| 6.086722069                | 0.002546804                                    | 24.09545781                         | 0.002628469                               | 0.068173892                                        |
| -0.569180228               | 0.002016946                                    | 27.70931968                         | 0.002079405                               | 0.059897706                                        |
| -4.338120782               | 0.001429465                                    | 39.05742197                         | 0.001467705                               | 0.052291094                                        |
| 3.972467666                | 0.003545913                                    | 14.6526005                          | 0.003695156                               | 0.086228492                                        |
| -2.113467689               | 0.002231703                                    | 14.90143926                         | 0.002349035                               | 0.084341654                                        |
| -2.516294932               | 0.003460111                                    | 36.60647859                         | 0.003522789                               | 0.050033879                                        |
| -3.713154891               | 0.001103005                                    | 40.79455402                         | 0.001128128                               | 0.057401822                                        |
| -2.25323435                | 0.001647166                                    | 27.03378482                         | 0.001708634                               | 0.068237733                                        |
| 1.526310683                | 0.002711899                                    | 26.57560454                         | 0.002788899                               | 0.059974259                                        |
| 0.359381145                | 0.007101455                                    | 11.51960434                         | 0.007429759                               | 0.103866347                                        |
| -1.76872832                | 0.002855738                                    | 14.81485694                         | 0.003003572                               | 0.089462518                                        |
| -1.424644832               | 0.004726649                                    | 31.3496957                          | 0.00481866                                | 0.060944124                                        |
| 0.790648896                | 0.002372283                                    | 38.21980126                         | 0.002432756                               | 0.051062501                                        |
| -1.655725114               | 0.002789587                                    | 14.27468817                         | 0.002903965                               | 0.08437734                                         |
| -1.838733719               | 0.002595994                                    | 19.95290724                         | 0.002690051                               | 0.07408379                                         |
| -0.331280014               | 0.003436604                                    | 15.66922688                         | 0.003570315                               | 0.083783198                                        |
| -4.234376662               | 0.001504728                                    | 39.82402822                         | 0.001550338                               | 0.055558014                                        |
| 2.543959675                | 0.002433544                                    | 28.85159224                         | 0.002526875                               | 0.074848777                                        |
| -0.923030503               | 0.002748581                                    | 31.20110586                         | 0.002808383                               | 0.057270941                                        |
| 1.561576085                | 0.003132112                                    | 27.97370494                         | 0.003230775                               | 0.060939306                                        |
| -1.349183844               | 0.008067224                                    | 20.61064692                         | 0.008256399                               | 0.066305746                                        |
| -1.502340185               | 0.001771322                                    | 31.68725615                         | 0.001822988                               | 0.066775076                                        |
| -1.73882421                | 0.002888613                                    | 17.90586197                         | 0.002989108                               | 0.088685578                                        |
| -0.314679005               | 0.007349813                                    | 10.51430777                         | 0.007679313                               | 0.098200501                                        |
| -0.895409087               | 0.003534338                                    | 35.99306859                         | 0.003595249                               | 0.051708626                                        |
| -0.379993424               | 0.003099537                                    | 53.06322268                         | 0.00314445                                | 0.043987719                                        |
| -0.267451962               | 0.005847065                                    | 14.46995127                         | 0.006109008                               | 0.088924927                                        |
| 0.253240351                | 0.00764178                                     | 11.45980166                         | 0.008031473                               | 0.101567911                                        |
| -0.121544905               | 0.007614928                                    | 7.179908102                         | 0.00808994                                | 0.114657242                                        |
| 4.805051899                | 0.002732072                                    | 29.12558782                         | 0.002813695                               | 0.057111758                                        |
| 0.33950335                 | 0.006829278                                    | 8.458558386                         | 0.00738157                                | 0.131797204                                        |
| 0.024412342                | 0.003450922                                    | 22.42081655                         | 0.003562092                               | 0.06927376                                         |
| -7.862137154               | 0.002515954                                    | 16.35602629                         | 0.002632672                               | 0.091563177                                        |
| -2.81655493                | 0.006840106                                    | 11.73351064                         | 0.007128447                               | 0.096385554                                        |
| -2.535451287               | 0.003838541                                    | 23.6367367                          | 0.003973675                               | 0.074883111                                        |
| -0.885976647               | 0.005679684                                    | 11.13658806                         | 0.00598822                                | 0.11068831                                         |
| 3.422857649                | 0.001454923                                    | 34.70960535                         | 0.001486905                               | 0.055657248                                        |
| -1.671301606               | 0.002091134                                    | 29.00309417                         | 0.002150698                               | 0.058301698                                        |
| -1.057554616               | 0.001743254                                    | 22.91379398                         | 0.001802017                               | 0.068253989                                        |
| 1.155674289                | 0.001877164                                    | 18.8721589                          | 0.001948683                               | 0.075585724                                        |
| -2.728124364               | 0.002295341                                    | 32.96115329                         | 0.002356562                               | 0.057518446                                        |
| -1.659691141               | 0.002876257                                    | 16.96042228                         | 0.002991178                               | 0.081643621                                        |
| 0.879236806                | 0.004117528                                    | 20.7028553                          | 0.004274469                               | 0.086535355                                        |
| 0.079417084                | 0.00389843                                     | 18.67050832                         | 0.004054996                               | 0.091920622                                        |
| 3.31409717                 | 0.002258035                                    | 23.16891785                         | 0.002348677                               | 0.071114591                                        |

| wavelet.HHL_glrIm_RunVariance | wavelet.HHL_glrIm_GrayLevelNonUniformity | wavelet.HHL_glrIm_LongRunEmphasis | wavelet.HHL_glrIm_ShortRunHighGrayLevelEmphasis | wavelet.HHL_glrIm_RunLengthNonUniformity |
|-------------------------------|------------------------------------------|-----------------------------------|-------------------------------------------------|------------------------------------------|
| 0.040690725                   | 90.37693181                              | 1.121349668                       | 844.4426968                                     | 1892.625638                              |
| 0.064707341                   | 61.40845159                              | 1.185836573                       | 512.674031                                      | 792.7300344                              |
| 0.084185889                   | 104.3385148                              | 1.232316421                       | 277.6278178                                     | 1261.438966                              |
| 0.076775336                   | 63.53478196                              | 1.225109673                       | 420.5573665                                     | 799.5752218                              |
| 0.079755638                   | 195.2786611                              | 1.235188494                       | 186.0916452                                     | 1917.599376                              |
| 0.054894557                   | 42.97039863                              | 1.159428694                       | 215.0343793                                     | 571.8394831                              |
| 0.07111799                    | 333.5265275                              | 1.199884367                       | 655.317296                                      | 4750.83463                               |
| 0.091150336                   | 396.977676                               | 1.259315003                       | 536.7027295                                     | 4090.661244                              |
| 0.094365885                   | 387.0109436                              | 1.270045435                       | 528.561294                                      | 3600.513333                              |
| 0.048939201                   | 60.2117498                               | 1.145956221                       | 447.8514416                                     | 935.7837367                              |
| 0.076307541                   | 113.1744915                              | 1.220890005                       | 218.7567594                                     | 1243.39236                               |
| 0.063119396                   | 145.7101188                              | 1.182331277                       | 741.1494513                                     | 1958.248209                              |
| 0.157081415                   | 188.3906817                              | 1.425629132                       | 526.1425492                                     | 1344.131683                              |
| 0.081440279                   | 131.8492928                              | 1.235337483                       | 341.593525                                      | 1396.747143                              |
| 0.057365871                   | 110.7563412                              | 1.166539146                       | 754.1730906                                     | 1708.411425                              |
| 0.068981483                   | 269.9428482                              | 1.199440901                       | 497.6468084                                     | 3665.223349                              |
| 0.047870171                   | 63.51147185                              | 1.143177997                       | 567.7249901                                     | 1044.627081                              |
| 0.115841958                   | 121.4652717                              | 1.329171961                       | 439.132062                                      | 937.0904307                              |
| 0.090870089                   | 123.8607828                              | 1.264815237                       | 131.5774898                                     | 1028.209257                              |
| 0.060955138                   | 299.2923876                              | 1.17777084                        | 1046.355568                                     | 4425.547236                              |
| 0.17250673                    | 362.5018772                              | 1.478216815                       | 146.8022903                                     | 2078.4365                                |
| 0.075484513                   | 81.53296318                              | 1.216538948                       | 244.717142                                      | 892.0361041                              |
| 0.046891597                   | 50.20012755                              | 1.136041534                       | 524.6503132                                     | 905.1267426                              |
| 0.071539627                   | 185.1299218                              | 1.205229062                       | 315.0431633                                     | 2206.465313                              |
| 0.062021606                   | 72.01377634                              | 1.180279449                       | 546.646797                                      | 1082.563666                              |
| 0.076990835                   | 178.3333648                              | 1.220813839                       | 502.8996884                                     | 1951.961836                              |
| 0.060144584                   | 185.0596134                              | 1.177144193                       | 390.3613512                                     | 2748.423417                              |
| 0.08360048                    | 198.6298403                              | 1.236403787                       | 380.4680016                                     | 2254.754004                              |
| 0.052511392                   | 30.92071078                              | 1.155642885                       | 424.2181565                                     | 387.4147865                              |
| 0.073352958                   | 148.8293731                              | 1.211598935                       | 308.9390953                                     | 1703.026805                              |
| 0.12205063                    | 456.3761429                              | 1.342692222                       | 267.3088453                                     | 3584.653763                              |
| 0.05580222                    | 108.233661                               | 1.16412792                        | 571.7911475                                     | 1780.216761                              |
| 0.062230628                   | 188.1912813                              | 1.17904936                        | 563.8611024                                     | 2752.943104                              |
| 0.057653659                   | 110.3201261                              | 1.163721059                       | 522.8117126                                     | 2035.008354                              |
| 0.077324511                   | 335.6386157                              | 1.224436969                       | 273.9091231                                     | 3606.638701                              |
| 0.09777473                    | 250.5081579                              | 1.278292218                       | 407.7806329                                     | 2367.173411                              |
| 0.097420755                   | 280.9170881                              | 1.273443169                       | 1084.538347                                     | 2958.442661                              |
| 0.099137805                   | 300.1610643                              | 1.263440866                       | 1035.550444                                     | 4175.422385                              |
| 0.049125535                   | 75.34502986                              | 1.146132426                       | 321.7857531                                     | 1073.376562                              |
| 0.057677264                   | 415.7143923                              | 1.166935473                       | 807.0277595                                     | 6254.269877                              |
| 0.12721198                    | 256.7633466                              | 1.359737997                       | 204.2828568                                     | 1925.486473                              |
| 0.05150231                    | 216.5619307                              | 1.152023839                       | 469.4745786                                     | 3361.09873                               |
| 0.093065312                   | 290.9164167                              | 1.265108255                       | 415.0671539                                     | 2913.240653                              |
| 0.041725683                   | 119.9270888                              | 1.12294219                        | 445.114911                                      | 2219.11897                               |
| 0.055549397                   | 72.68817293                              | 1.162465253                       | 402.4737751                                     | 1103.437201                              |
| 0.059208998                   | 170.8062901                              | 1.173472114                       | 514.7955958                                     | 2345.997289                              |
| 0.09208559                    | 370.6287199                              | 1.26385833                        | 535.8204328                                     | 3629.495448                              |
| 0.072803401                   | 63.40995745                              | 1.212408165                       | 865.8881811                                     | 721.3915745                              |
| 0.060120246                   | 57.73152159                              | 1.178969108                       | 383.4497941                                     | 722.2998292                              |
| 0.090546889                   | 110.106936                               | 1.255839027                       | 277.6984236                                     | 1087.633865                              |
| 0.052902543                   | 144.375068                               | 1.153921032                       | 485.4893292                                     | 2234.82147                               |
| 0.047841985                   | 179.207462                               | 1.140431349                       | 525.5248444                                     | 2960.844874                              |
| 0.066027282                   | 296.7963267                              | 1.1911933                         | 460.7898717                                     | 3803.063462                              |
| 0.113103038                   | 114.7979776                              | 1.323935049                       | 153.4327931                                     | 840.2997074                              |
| 0.087385834                   | 102.3456813                              | 1.248057551                       | 565.7311099                                     | 1074.325647                              |
| 0.065485666                   | 125.3640619                              | 1.1904119                         | 654.0537197                                     | 1642.743468                              |
| 0.057038662                   | 230.0787694                              | 1.166707996                       | 652.2243042                                     | 3477.26267                               |
| 0.05779093                    | 171.8161579                              | 1.16644108                        | 1045.252899                                     | 2982.043662                              |
| 0.089369279                   | 131.6518218                              | 1.255265115                       | 380.1624121                                     | 1320.967661                              |
| 0.099573472                   | 710.4758231                              | 1.274548576                       | 488.4889215                                     | 7255.975993                              |
| 0.043592657                   | 84.90995294                              | 1.126959126                       | 569.3431911                                     | 1571.827974                              |
| 0.058644568                   | 145.5771728                              | 1.167827607                       | 1532.270679                                     | 2299.137917                              |
| 0.070695297                   | 371.7206031                              | 1.201001142                       | 745.8611954                                     | 4856.834951                              |
| 0.053481616                   | 435.4339625                              | 1.156257614                       | 517.2869352                                     | 6607.485105                              |
| 0.108110277                   | 75.01832495                              | 1.309507774                       | 208.962704                                      | 610.9641555                              |
| 0.093652159                   | 318.5674446                              | 1.270404298                       | 407.7990729                                     | 3049.348312                              |
| 0.057240078                   | 75.42551552                              | 1.167822159                       | 473.5231683                                     | 1118.756566                              |
| 0.048227057                   | 305.3454854                              | 1.140924687                       | 719.4707817                                     | 5490.003975                              |
| 0.072412487                   | 464.0464319                              | 1.207041173                       | 412.7758955                                     | 4879.25034                               |
| 0.070692395                   | 201.8562374                              | 1.202770209                       | 500.6272829                                     | 2423.318297                              |
| 0.084376053                   | 101.1840764                              | 1.242371716                       | 413.5127353                                     | 1052.017877                              |
| 0.059476788                   | 225.9981931                              | 1.172201644                       | 924.3136115                                     | 3673.303066                              |
| 0.089055002                   | 158.3766595                              | 1.250837362                       | 601.9646692                                     | 1841.317354                              |
| 0.050782219                   | 123.3264066                              | 1.151697255                       | 656.2641117                                     | 1960.059143                              |
| 0.061551261                   | 180.6472661                              | 1.178688114                       | 474.310274                                      | 2671.60882                               |
| 0.055097107                   | 84.52954528                              | 1.164097685                       | 250.0611901                                     | 1153.557115                              |
| 0.067697755                   | 150.7506433                              | 1.19463948                        | 861.0920229                                     | 2015.33699                               |
| 0.095560426                   | 78.3282376                               | 1.273905282                       | 577.7243173                                     | 757.3446994                              |
| 0.084980151                   | 155.5715585                              | 1.246601368                       | 183.1480897                                     | 1373.593045                              |
| 0.045872774                   | 116.0145618                              | 1.133108403                       | 569.4572796                                     | 2071.083602                              |
| 0.038840567                   | 84.32064642                              | 1.115810541                       | 735.095895                                      | 1782.945723                              |
| 0.095554838                   | 147.6898985                              | 1.27030003                        | 240.9981319                                     | 1429.255835                              |
| 0.112887697                   | 303.0049527                              | 1.315054065                       | 182.0506978                                     | 2516.565398                              |
| 0.113262227                   | 320.0959301                              | 1.325596964                       | 152.3233416                                     | 2330.374664                              |
| 0.055740372                   | 132.3761859                              | 1.164556729                       | 524.7578537                                     | 2100.627305                              |
| 0.181341437                   | 176.686792                               | 1.495546656                       | 174.4779738                                     | 1052.972464                              |
| 0.063473545                   | 156.1527955                              | 1.183724833                       | 425.8513527                                     | 2023.514839                              |
| 0.105968125                   | 230.1382369                              | 1.296833322                       | 518.4990565                                     | 2137.500139                              |
| 0.086732196                   | 130.6379842                              | 1.254201193                       | 206.5800811                                     | 1168.91957                               |
| 0.087291866                   | 141.0075583                              | 1.245533779                       | 417.1699784                                     | 1643.647015                              |
| 0.114658907                   | 131.3868142                              | 1.323855883                       | 263.6741881                                     | 996.2052306                              |
| 0.047599572                   | 126.8688007                              | 1.140246523                       | 1065.03151                                      | 2092.884323                              |
| 0.053857646                   | 287.8290978                              | 1.156515118                       | 653.4651796                                     | 4495.354185                              |
| 0.064070248                   | 212.5814666                              | 1.187342634                       | 744.6085468                                     | 2786.259335                              |
| 0.068348624                   | 309.3848566                              | 1.199115496                       | 642.5288684                                     | 3637.304315                              |
| 0.055967126                   | 187.1835294                              | 1.162142846                       | 654.2624039                                     | 2954.51276                               |
| 0.08341186                    | 214.4529372                              | 1.234998926                       | 453.4343483                                     | 2303.240588                              |
| 0.120241495                   | 82.74448188                              | 1.322880255                       | 415.8703374                                     | 810.4661269                              |
| 0.110276863                   | 70.17259749                              | 1.306571041                       | 412.8477372                                     | 647.8223145                              |
| 0.07534544                    | 384.7600973                              | 1.215256181                       | 555.6166638                                     | 4782.912154                              |

| wavelet.HHL_glrIm_ShortRunEmphasis | wavelet.HHL_glrIm_LongRunHighGrayLevelEmphasis | wavelet.HHL_glrIm_RunPercentage | wavelet.HHL_glrIm_LongRunLowGrayLevelEmphasis | wavelet.HHL_glrIm_RunEntropy |
|------------------------------------|------------------------------------------------|---------------------------------|-----------------------------------------------|------------------------------|
| 0.971243947                        | 969.7520631                                    | 0.962118466                     | 0.002363088                                   | 5.053412087                  |
| 0.958671732                        | 625.6922541                                    | 0.944714109                     | 0.003823945                                   | 4.516707306                  |
| 0.951186102                        | 354.7690658                                    | 0.933808043                     | 0.007157662                                   | 4.483095219                  |
| 0.949479799                        | 540.9882877                                    | 0.933784741                     | 0.004739871                                   | 4.574968992                  |
| 0.947037082                        | 238.8557834                                    | 0.930548337                     | 0.008952412                                   | 4.12672874                   |
| 0.963990997                        | 257.0868206                                    | 0.951864802                     | 0.011161588                                   | 4.410301395                  |
| 0.956644601                        | 816.3963874                                    | 0.941535195                     | 0.002402937                                   | 4.687751028                  |
| 0.944431145                        | 711.5341908                                    | 0.925742425                     | 0.002851111                                   | 4.416367292                  |
| 0.941657696                        | 709.4782715                                    | 0.922620055                     | 0.002728941                                   | 4.198930385                  |
| 0.965776488                        | 522.0238231                                    | 0.955008611                     | 0.00517457                                    | 4.731916818                  |
| 0.951195024                        | 276.037309                                     | 0.935727403                     | 0.008829753                                   | 4.32346407                   |
| 0.959099057                        | 911.4728456                                    | 0.945603204                     | 0.002240459                                   | 4.582917608                  |
| 0.917987325                        | 807.7069331                                    | 0.889250546                     | 0.003457317                                   | 4.198666814                  |
| 0.948080882                        | 439.1777594                                    | 0.931499485                     | 0.005370337                                   | 4.34143246                   |
| 0.96236623                         | 909.7403119                                    | 0.949984491                     | 0.002520929                                   | 4.772819748                  |
| 0.955514756                        | 621.8515131                                    | 0.940918999                     | 0.003235474                                   | 4.631343002                  |
| 0.966282016                        | 668.9830202                                    | 0.955804664                     | 0.003742883                                   | 4.726186191                  |
| 0.931228473                        | 623.1252995                                    | 0.908603157                     | 0.004007446                                   | 4.089711456                  |
| 0.941529973                        | 174.9507834                                    | 0.923254711                     | 0.012721837                                   | 3.919214916                  |
| 0.959599795                        | 1278.513971                                    | 0.946498587                     | 0.001730096                                   | 4.790310576                  |
| 0.906611278                        | 237.559874                                     | 0.875864876                     | 0.011636918                                   | 3.820657269                  |
| 0.952384056                        | 307.9686736                                    | 0.936479646                     | 0.007493215                                   | 4.30851639                   |
| 0.968983422                        | 610.3006868                                    | 0.958533654                     | 0.004073181                                   | 4.816741006                  |
| 0.954506005                        | 392.4902312                                    | 0.939350789                     | 0.005352388                                   | 4.412068417                  |
| 0.959264106                        | 669.6226972                                    | 0.946099462                     | 0.004055953                                   | 4.769051741                  |
| 0.951574446                        | 640.2408227                                    | 0.935285904                     | 0.003749463                                   | 4.380079323                  |
| 0.959280489                        | 475.3474381                                    | 0.946322777                     | 0.004749792                                   | 4.681282812                  |
| 0.949151953                        | 489.9728365                                    | 0.931905531                     | 0.00476799                                    | 4.470057155                  |
| 0.963967379                        | 506.1375788                                    | 0.952503872                     | 0.005578827                                   | 4.340627275                  |
| 0.953072399                        | 387.1190456                                    | 0.93760762                      | 0.005625534                                   | 4.402412208                  |
| 0.929320631                        | 380.8887652                                    | 0.905632619                     | 0.005872697                                   | 4.120942921                  |
| 0.962260024                        | 685.3190588                                    | 0.95010596                      | 0.003088347                                   | 4.811616154                  |
| 0.960004671                        | 686.6191608                                    | 0.946613622                     | 0.003040726                                   | 4.689166409                  |
| 0.96392285                         | 625.5938836                                    | 0.951227496                     | 0.004709514                                   | 4.922536238                  |
| 0.950023244                        | 348.983153                                     | 0.933836373                     | 0.006320373                                   | 4.305109876                  |
| 0.940662843                        | 549.0002653                                    | 0.921076256                     | 0.003892102                                   | 4.320561085                  |
| 0.942541105                        | 1456.635129                                    | 0.922890869                     | 0.001530051                                   | 4.502663489                  |
| 0.947431026                        | 1370.673593                                    | 0.927354568                     | 0.001580223                                   | 4.853988611                  |
| 0.965742946                        | 376.5235403                                    | 0.954971857                     | 0.007029146                                   | 4.518440342                  |
| 0.962299694                        | 973.8538264                                    | 0.949719606                     | 0.001802037                                   | 4.670192057                  |
| 0.925610363                        | 295.6986559                                    | 0.9011921                       | 0.008484912                                   | 4.067836668                  |
| 0.96474766                         | 558.0465759                                    | 0.953511965                     | 0.00355747                                    | 4.656553975                  |
| 0.943259688                        | 549.326178                                     | 0.924298259                     | 0.003729649                                   | 4.331061041                  |
| 0.971292433                        | 509.6670281                                    | 0.961878556                     | 0.00494337                                    | 4.840600388                  |
| 0.962995898                        | 479.6751822                                    | 0.950944986                     | 0.004947569                                   | 4.662927553                  |
| 0.96051302                         | 624.0404767                                    | 0.947709121                     | 0.003064732                                   | 4.55169217                   |
| 0.942860522                        | 714.1586277                                    | 0.92403804                      | 0.002731405                                   | 4.2750136                    |
| 0.952517304                        | 1092.677349                                    | 0.93729577                      | 0.002858461                                   | 4.452614647                  |
| 0.958612482                        | 467.1494082                                    | 0.945855555                     | 0.00576986                                    | 4.460036389                  |
| 0.945547526                        | 364.2368083                                    | 0.927002731                     | 0.007036354                                   | 4.306460015                  |
| 0.96499419                         | 574.4015726                                    | 0.953349103                     | 0.003871169                                   | 4.720288501                  |
| 0.967467873                        | 614.2120798                                    | 0.956849143                     | 0.003215312                                   | 4.725527597                  |
| 0.957130873                        | 568.5856487                                    | 0.943057829                     | 0.003458729                                   | 4.510556134                  |
| 0.931425658                        | 215.1565171                                    | 0.909489967                     | 0.011016565                                   | 3.888432733                  |
| 0.946781018                        | 747.4367597                                    | 0.928397918                     | 0.003809519                                   | 4.438471225                  |
| 0.957063048                        | 695.4813687                                    | 0.943037475                     | 0.002989444                                   | 4.551235178                  |
| 0.962009347                        | 786.554771                                     | 0.949605401                     | 0.00235333                                    | 4.676673419                  |
| 0.962760122                        | 1258.808397                                    | 0.950193531                     | 0.001638901                                   | 4.889625994                  |
| 0.944694888                        | 500.7126025                                    | 0.926390963                     | 0.004382118                                   | 4.272207863                  |
| 0.942959511                        | 657.065231                                     | 0.922731448                     | 0.002910908                                   | 4.33858385                   |
| 0.970771881                        | 654.0676172                                    | 0.96097221                      | 0.00379295                                    | 4.822515226                  |
| 0.962551807                        | 1850.27039                                     | 0.949812734                     | 0.001240383                                   | 4.83011979                   |
| 0.956055516                        | 930.1418083                                    | 0.940962303                     | 0.001988481                                   | 4.623517086                  |
| 0.964180405                        | 615.7649066                                    | 0.952421316                     | 0.003124115                                   | 4.652592232                  |
| 0.9349881164                       | 289.0096446                                    | 0.914021422                     | 0.008987001                                   | 4.054786613                  |
| 0.940901272                        | 546.1410556                                    | 0.922021272                     | 0.003677853                                   | 4.293158574                  |
| 0.961591388                        | 569.0149768                                    | 0.949091553                     | 0.005218945                                   | 4.705278538                  |
| 0.967524721                        | 842.5589719                                    | 0.956787692                     | 0.002691028                                   | 4.878618184                  |
| 0.954378215                        | 518.9961049                                    | 0.938981626                     | 0.003421954                                   | 4.245140523                  |
| 0.955160507                        | 625.8401813                                    | 0.940224027                     | 0.003115235                                   | 4.44060612                   |
| 0.947188104                        | 537.8170374                                    | 0.929650027                     | 0.004181044                                   | 4.308902317                  |
| 0.961135565                        | 1119.173782                                    | 0.948197956                     | 0.00175113                                    | 4.882361728                  |
| 0.946650496                        | 788.1520265                                    | 0.92834239                      | 0.00296327                                    | 4.617386787                  |
| 0.964294051                        | 778.0258912                                    | 0.953246842                     | 0.003061239                                   | 4.724490852                  |
| 0.959939848                        | 576.8002956                                    | 0.946785249                     | 0.003666696                                   | 4.685434443                  |
| 0.961825428                        | 299.3972373                                    | 0.949959876                     | 0.009069936                                   | 4.468537778                  |
| 0.956748558                        | 1068.504918                                    | 0.942211378                     | 0.002054866                                   | 4.667167033                  |
| 0.94107267                         | 779.3853692                                    | 0.921792195                     | 0.003454616                                   | 4.316008788                  |
| 0.945540323                        | 237.4137363                                    | 0.928078951                     | 0.009164347                                   | 4.049472806                  |
| 0.969549102                        | 662.7492441                                    | 0.959219916                     | 0.003860225                                   | 4.819213771                  |
| 0.972508176                        | 838.5437847                                    | 0.963762231                     | 0.003332845                                   | 5.047765572                  |
| 0.942442414                        | 320.0780397                                    | 0.923119682                     | 0.007327573                                   | 4.27230727                   |
| 0.934731992                        | 252.4376187                                    | 0.912558534                     | 0.009894245                                   | 4.136128573                  |
| 0.930757918                        | 214.6143127                                    | 0.908483316                     | 0.010318318                                   | 3.89357887                   |
| 0.962210941                        | 629.693052                                     | 0.950294888                     | 0.003170044                                   | 4.705672954                  |
| 0.905597146                        | 281.7987494                                    | 0.87482462                      | 0.010242217                                   | 3.922906793                  |
| 0.958800606                        | 519.6548851                                    | 0.945105628                     | 0.004055998                                   | 4.514919778                  |
| 0.937986034                        | 717.2696159                                    | 0.916624586                     | 0.003190048                                   | 4.310275331                  |
| 0.943560007                        | 272.0864458                                    | 0.92575662                      | 0.00842367                                    | 4.119484966                  |
| 0.947788022                        | 544.4603032                                    | 0.92980057                      | 0.0046024                                     | 4.52163271                   |
| 0.932671914                        | 370.1016087                                    | 0.910099103                     | 0.00742999                                    | 4.020310617                  |
| 0.967477491                        | 1249.777656                                    | 0.956920493                     | 0.001624829                                   | 4.770606349                  |
| 0.964328959                        | 777.5708847                                    | 0.952522299                     | 0.002412119                                   | 4.703106579                  |
| 0.957537204                        | 918.0610372                                    | 0.943799534                     | 0.002061205                                   | 4.541791                     |
| 0.955123505                        | 802.3833999                                    | 0.940524283                     | 0.00226484                                    | 4.413212628                  |
| 0.963239467                        | 783.311127                                     | 0.95097334                      | 0.002625994                                   | 4.765462957                  |
| 0.949573877                        | 585.4904067                                    | 0.932415827                     | 0.003524916                                   | 4.352857167                  |
| 0.936319113                        | 579.4452428                                    | 0.912791125                     | 0.005062315                                   | 4.434622788                  |
| 0.93680358                         | 569.3769769                                    | 0.915144807                     | 0.004811621                                   | 4.260998725                  |
| 0.952810392                        | 702.6908136                                    | 0.937025392                     | 0.002760173                                   | 4.552940657                  |

| wavelet.HHL_glrIm_HighGrayLevelRunEmphasis | wavelet.HHL_glrIm_RunLengthNonUniformityNormalized | wavelet.HHL_glszm_GrayLevelVariance | wavelet.HHL_glszm_SmallAreaHighGrayLevelEmphasis |
|--------------------------------------------|----------------------------------------------------|-------------------------------------|--------------------------------------------------|
| 868.4748564                                | 0.926826155                                        | 68.3294121                          | 686.595084                                       |
| 533.2069881                                | 0.897135589                                        | 37.7797276                          | 423.7709747                                      |
| 291.1068486                                | 0.8800964                                          | 32.3325449                          | 216.8552451                                      |
| 442.6081083                                | 0.875813261                                        | 41.06270885                         | 320.298276                                       |
| 195.8055274                                | 0.869956927                                        | 18.59687035                         | 147.4854497                                      |
| 222.7325636                                | 0.909822041                                        | 29.90514687                         | 165.4832064                                      |
| 684.0957334                                | 0.892528212                                        | 41.37803951                         | 509.88661                                        |
| 567.6051539                                | 0.864576746                                        | 37.43851716                         | 420.4871214                                      |
| 560.7097597                                | 0.858074861                                        | 23.98863822                         | 397.2176871                                      |
| 461.9160897                                | 0.913751702                                        | 51.9542309                          | 390.9710088                                      |
| 229.1047394                                | 0.880142663                                        | 26.09117295                         | 175.0190562                                      |
| 772.314381                                 | 0.89806212                                         | 41.73607314                         | 581.2006439                                      |
| 571.5936134                                | 0.808314837                                        | 35.05036231                         | 446.525869                                       |
| 359.2130097                                | 0.87270564                                         | 31.83815779                         | 269.3179632                                      |
| 782.8346791                                | 0.905928142                                        | 52.82493775                         | 594.4881007                                      |
| 520.3155477                                | 0.889730402                                        | 39.20356669                         | 387.0936176                                      |
| 587.0577077                                | 0.914973281                                        | 44.38034466                         | 426.7680085                                      |
| 470.8974998                                | 0.835711328                                        | 28.04342771                         | 342.8478169                                      |
| 139.3874237                                | 0.857641789                                        | 14.36185557                         | 97.5748534                                       |
| 1089.33762                                 | 0.899079284                                        | 61.03775531                         | 823.8243508                                      |
| 161.6553126                                | 0.784032073                                        | 14.64536938                         | 112.7250313                                      |
| 256.1313093                                | 0.88246882                                         | 26.722284                           | 197.0350383                                      |
| 540.582801                                 | 0.921754332                                        | 47.80569263                         | 417.7626224                                      |
| 329.0640957                                | 0.88720233                                         | 28.1536268                          | 256.4045799                                      |
| 569.3088                                   | 0.898399443                                        | 55.72185256                         | 429.1346709                                      |
| 527.6521063                                | 0.880664589                                        | 31.16860743                         | 393.1088725                                      |
| 406.2810624                                | 0.898163525                                        | 40.29997057                         | 307.1015214                                      |
| 399.8712991                                | 0.875423771                                        | 36.17846202                         | 303.7690797                                      |
| 439.6161499                                | 0.909498652                                        | 30.85862004                         | 322.9192951                                      |
| 323.1655804                                | 0.883974326                                        | 31.37591431                         | 254.9396375                                      |
| 286.7493738                                | 0.831372641                                        | 24.52105526                         | 221.0035141                                      |
| 592.9723739                                | 0.905341146                                        | 50.35176182                         | 460.2292637                                      |
| 586.2291218                                | 0.900257021                                        | 43.59402111                         | 448.2931613                                      |
| 541.3566995                                | 0.909897243                                        | 53.3016459                          | 429.4576623                                      |
| 287.5779079                                | 0.876785972                                        | 25.84236322                         | 220.998435                                       |
| 432.6170123                                | 0.85626749                                         | 33.74216417                         | 330.0473562                                      |
| 1149.175444                                | 0.860718477                                        | 48.36847599                         | 886.830676                                       |
| 1091.406419                                | 0.87183973                                         | 57.81557732                         | 824.7332696                                      |
| 332.1511802                                | 0.913558378                                        | 33.30524282                         | 260.7994266                                      |
| 837.7714367                                | 0.905554787                                        | 39.80308169                         | 625.1515162                                      |
| 219.9619321                                | 0.8232271                                          | 20.98128279                         | 165.8247592                                      |
| 486.159944                                 | 0.911245286                                        | 37.38498675                         | 371.9976071                                      |
| 438.7073596                                | 0.862146663                                        | 29.80177858                         | 334.7020315                                      |
| 457.3501304                                | 0.927069829                                        | 48.23489708                         | 364.9454043                                      |
| 416.841512                                 | 0.907419112                                        | 39.81938962                         | 320.3494218                                      |
| 535.0546806                                | 0.901389023                                        | 33.25950834                         | 405.0075897                                      |
| 567.5630526                                | 0.860737867                                        | 27.85683873                         | 419.4278296                                      |
| 907.1824091                                | 0.883010795                                        | 60.08079967                         | 694.9069877                                      |
| 399.180774                                 | 0.89684374                                         | 35.8741381                          | 290.6962724                                      |
| 292.9571456                                | 0.867202542                                        | 29.81399584                         | 221.3316508                                      |
| 501.973556                                 | 0.912106179                                        | 45.79045152                         | 395.8171327                                      |
| 542.1842328                                | 0.917744852                                        | 41.79823955                         | 421.416325                                       |
| 480.53021                                  | 0.893420556                                        | 34.05059404                         | 361.7860353                                      |
| 164.2260872                                | 0.836100035                                        | 16.3021262                          | 121.640068                                       |
| 597.8489951                                | 0.869839243                                        | 46.73115781                         | 427.3439852                                      |
| 588.1869419                                | 0.893102429                                        | 36.93684449                         | 447.1929875                                      |
| 677.1785738                                | 0.904907512                                        | 39.99495439                         | 501.5919394                                      |
| 1084.439926                                | 0.907025294                                        | 56.17310204                         | 812.6299759                                      |
| 401.6601028                                | 0.864940378                                        | 27.06662916                         | 292.5972297                                      |
| 517.4939543                                | 0.861180888                                        | 25.26597196                         | 367.6933289                                      |
| 585.1699564                                | 0.925930413                                        | 47.67918361                         | 464.3972763                                      |
| 1590.300099                                | 0.906269656                                        | 62.40754444                         | 1205.367922                                      |
| 778.8933237                                | 0.891195557                                        | 43.57471532                         | 602.8623106                                      |
| 535.6794222                                | 0.909892831                                        | 37.81645034                         | 405.6842643                                      |
| 222.9279566                                | 0.844588323                                        | 22.76859239                         | 170.9681501                                      |
| 432.641458                                 | 0.856160321                                        | 27.58723449                         | 319.7188164                                      |
| 491.3244084                                | 0.903751431                                        | 47.72208231                         | 386.9224526                                      |
| 742.516754                                 | 0.917902153                                        | 52.56020639                         | 577.884942                                       |
| 431.9729567                                | 0.886988871                                        | 23.05997101                         | 318.7118069                                      |
| 523.3252093                                | 0.888954183                                        | 32.04086797                         | 376.9763309                                      |
| 435.7614217                                | 0.870731581                                        | 26.07200588                         | 317.1550011                                      |
| 960.181085                                 | 0.902782579                                        | 58.71557996                         | 737.3805176                                      |
| 634.658381                                 | 0.869734126                                        | 49.23953583                         | 482.225368                                       |
| 679.4184555                                | 0.909997116                                        | 44.85516875                         | 522.884498                                       |
| 493.0777255                                | 0.900478742                                        | 41.22711199                         | 377.0708286                                      |
| 259.4229979                                | 0.904419259                                        | 28.99219709                         | 195.0720977                                      |
| 898.7427166                                | 0.892484087                                        | 52.74431589                         | 694.1465209                                      |
| 613.421887                                 | 0.85704921                                         | 35.36710123                         | 445.6959028                                      |
| 192.9689303                                | 0.866738368                                        | 19.12790337                         | 147.6879825                                      |
| 586.8450551                                | 0.922902991                                        | 48.12597923                         | 449.8069712                                      |
| 754.9641755                                | 0.92991422                                         | 67.06718442                         | 606.0337126                                      |
| 254.8933897                                | 0.860131801                                        | 26.89666469                         | 192.4129918                                      |
| 194.1484447                                | 0.843086907                                        | 21.9221151                          | 148.8581221                                      |
| 163.2624172                                | 0.834286916                                        | 15.04282907                         | 113.2171194                                      |
| 544.4120012                                | 0.905608729                                        | 40.25532866                         | 409.620694                                       |
| 191.6019562                                | 0.783565646                                        | 21.42212604                         | 155.7403221                                      |
| 443.0764906                                | 0.897375802                                        | 34.01967561                         | 348.5826669                                      |
| 552.8946563                                | 0.85015995                                         | 32.07377524                         | 395.383136                                       |
| 218.5009557                                | 0.862189717                                        | 21.81298271                         | 157.0313964                                      |
| 439.5036056                                | 0.872349335                                        | 41.09095967                         | 329.191176                                       |
| 282.0443772                                | 0.838760477                                        | 23.63000623                         | 214.6704711                                      |
| 1099.850829                                | 0.917882738                                        | 47.56957024                         | 831.3889353                                      |
| 676.55371                                  | 0.91031588                                         | 40.89687381                         | 512.9739449                                      |
| 776.6970966                                | 0.89429403                                         | 35.68297384                         | 583.0914374                                      |
| 671.8896827                                | 0.888496163                                        | 30.79090764                         | 495.3839046                                      |
| 678.1589491                                | 0.907702502                                        | 47.85379298                         | 532.775032                                       |
| 476.7796828                                | 0.876325756                                        | 29.77114944                         | 348.828419                                       |
| 442.7394463                                | 0.847237154                                        | 38.72772834                         | 346.6932262                                      |
| 439.6387544                                | 0.847974572                                        | 35.4012032                          | 323.7083116                                      |
| 582.0525191                                | 0.883576074                                        | 37.1311356                          | 435.9336249                                      |

| wavelet.HHL_glszm_GrayLevelNonUniformityNormalized | wavelet.HHL_glszm_SizeZoneNonUniformityNormalized | wavelet.HHL_glszm_SizeZoneNonUniformity | wavelet.HHL_glszm_GrayLevelNonUniformity |
|----------------------------------------------------|---------------------------------------------------|-----------------------------------------|------------------------------------------|
| 0.03623866                                         | 0.542437355                                       | 703.541249                              | 47.00154202                              |
| 0.050242806                                        | 0.485389457                                       | 217.9398664                             | 22.55902004                              |
| 0.051664883                                        | 0.440342129                                       | 304.276411                              | 35.70043415                              |
| 0.047549187                                        | 0.465923354                                       | 199.8811189                             | 20.3986014                               |
| 0.065189619                                        | 0.41557434                                        | 375.6792035                             | 58.93141593                              |
| 0.053806381                                        | 0.458413487                                       | 160.9031339                             | 18.88603989                              |
| 0.046154932                                        | 0.479013903                                       | 1315.372178                             | 126.7414421                              |
| 0.051981719                                        | 0.456511147                                       | 912.5657829                             | 103.9114557                              |
| 0.060322694                                        | 0.437225676                                       | 726.6690734                             | 100.2563177                              |
| 0.043291407                                        | 0.508970153                                       | 304.8731219                             | 25.93155259                              |
| 0.057479395                                        | 0.454600633                                       | 300.9456193                             | 38.05135952                              |
| 0.047482389                                        | 0.51101212                                        | 576.9326838                             | 53.60761736                              |
| 0.061150282                                        | 0.47766164                                        | 264.6245487                             | 33.87725632                              |
| 0.055288168                                        | 0.421709707                                       | 282.9672131                             | 37.09836066                              |
| 0.041019072                                        | 0.497665143                                       | 514.0880929                             | 42.37270087                              |
| 0.046154435                                        | 0.469261901                                       | 959.6405868                             | 94.38581907                              |
| 0.044941627                                        | 0.472356484                                       | 309.8658537                             | 29.48170732                              |
| 0.06313657                                         | 0.427391901                                       | 161.9815303                             | 23.92875989                              |
| 0.0757073                                          | 0.395702896                                       | 176.8791946                             | 33.84116331                              |
| 0.042632221                                        | 0.493755402                                       | 1292.651642                             | 111.6111536                              |
| 0.083108971                                        | 0.408981591                                       | 283.4242424                             | 57.59451659                              |
| 0.056696                                           | 0.450144                                          | 225.072                                 | 28.348                                   |
| 0.042009512                                        | 0.494042806                                       | 286.5448276                             | 24.36551724                              |
| 0.055086401                                        | 0.459963117                                       | 556.5553719                             | 66.65454545                              |
| 0.041101122                                        | 0.483836568                                       | 307.2362205                             | 26.0992126                               |
| 0.054930482                                        | 0.463931922                                       | 475.994152                              | 56.35867446                              |
| 0.045447249                                        | 0.474594207                                       | 774.0631514                             | 74.12446352                              |
| 0.050952117                                        | 0.460606925                                       | 532.9222126                             | 58.95159896                              |
| 0.057542533                                        | 0.464612476                                       | 106.8608696                             | 13.23478261                              |
| 0.053477187                                        | 0.457687041                                       | 414.6644592                             | 48.45033113                              |
| 0.063704999                                        | 0.452531235                                       | 650.7399166                             | 91.6077886                               |
| 0.041094229                                        | 0.505746871                                       | 547.2181146                             | 44.46395564                              |
| 0.044637168                                        | 0.483560895                                       | 781.4344059                             | 72.13366337                              |
| 0.038769898                                        | 0.531039331                                       | 684.5096974                             | 49.97439876                              |
| 0.057141549                                        | 0.458409855                                       | 851.7255113                             | 106.1689989                              |
| 0.054432137                                        | 0.470824922                                       | 520.2615385                             | 60.14751131                              |
| 0.047272416                                        | 0.50275007                                        | 733.0096022                             | 68.92318244                              |
| 0.040462149                                        | 0.485863921                                       | 1167.531003                             | 97.23054515                              |
| 0.050697952                                        | 0.465477741                                       | 307.6807867                             | 33.51134644                              |
| 0.045966771                                        | 0.484553984                                       | 1837.913261                             | 174.3519641                              |
| 0.067372422                                        | 0.437303707                                       | 347.2191436                             | 53.49370277                              |
| 0.046389394                                        | 0.50477637                                        | 1072.145009                             | 98.53107345                              |
| 0.05693778                                         | 0.438120819                                       | 617.7503546                             | 80.2822695                               |
| 0.04133305                                         | 0.530642058                                       | 800.2082228                             | 62.33023873                              |
| 0.045952328                                        | 0.471539318                                       | 315.9313433                             | 30.7880597                               |
| 0.049766236                                        | 0.472936502                                       | 664.002849                              | 69.87179487                              |
| 0.058645999                                        | 0.454812261                                       | 779.0934034                             | 100.4605954                              |
| 0.051163578                                        | 0.469192524                                       | 183.9234694                             | 20.05612245                              |
| 0.051705398                                        | 0.440137099                                       | 183.5371703                             | 21.56115108                              |
| 0.058086356                                        | 0.474942511                                       | 265.0179211                             | 32.41218638                              |
| 0.04444775                                         | 0.507542189                                       | 717.1571125                             | 62.80467091                              |
| 0.044688279                                        | 0.502986675                                       | 967.7463617                             | 85.98024948                              |
| 0.050477449                                        | 0.462601685                                       | 979.7903683                             | 106.911237                               |
| 0.077141442                                        | 0.407083524                                       | 131.8950617                             | 24.99382716                              |
| 0.049899579                                        | 0.467836997                                       | 253.0998152                             | 27.04436229                              |
| 0.04939512                                         | 0.460765772                                       | 432.1982942                             | 46.3326226                               |
| 0.045267298                                        | 0.477298808                                       | 1004.236692                             | 95.24239544                              |
| 0.04004927                                         | 0.490495525                                       | 896.6258206                             | 73.21006565                              |
| 0.058475251                                        | 0.453292519                                       | 289.200627                              | 37.30721003                              |
| 0.056753867                                        | 0.439341161                                       | 1602.277214                             | 206.9813545                              |
| 0.04186005                                         | 0.509587872                                       | 528.442623                              | 43.40887175                              |
| 0.041101753                                        | 0.494946718                                       | 688.4708843                             | 57.17253774                              |
| 0.046654463                                        | 0.499364233                                       | 1371.753549                             | 128.1598107                              |
| 0.046755235                                        | 0.47956844                                        | 1938.415636                             | 188.9846611                              |
| 0.068048972                                        | 0.443660796                                       | 123.781362                              | 18.98566308                              |
| 0.057007283                                        | 0.452545054                                       | 644.4241573                             | 81.17837079                              |
| 0.043763323                                        | 0.503299823                                       | 333.6877828                             | 29.01508296                              |
| 0.040090325                                        | 0.514295564                                       | 1817.006227                             | 141.6391169                              |
| 0.060461243                                        | 0.462171006                                       | 1201.644615                             | 157.1992308                              |
| 0.05395012                                         | 0.437648169                                       | 570.2555641                             | 70.29700691                              |
| 0.057814937                                        | 0.438244876                                       | 234.8992537                             | 30.98880597                              |
| 0.040280565                                        | 0.487982461                                       | 1081.369134                             | 89.26173285                              |
| 0.045963051                                        | 0.497868332                                       | 489.902439                              | 45.22764228                              |
| 0.043854633                                        | 0.495821488                                       | 600.9356436                             | 53.15181518                              |
| 0.044899814                                        | 0.480988105                                       | 753.7083599                             | 70.35800893                              |
| 0.053357487                                        | 0.441138657                                       | 306.5913669                             | 37.08345324                              |
| 0.045349225                                        | 0.496472705                                       | 573.425974                              | 52.37835498                              |
| 0.054242985                                        | 0.454669623                                       | 164.1357341                             | 19.58171745                              |
| 0.068065621                                        | 0.425101857                                       | 274.1906977                             | 43.90232558                              |
| 0.042589751                                        | 0.514382543                                       | 703.1609364                             | 58.2201902                               |
| 0.036399264                                        | 0.555934367                                       | 693.8060897                             | 45.42628205                              |
| 0.056852585                                        | 0.426969732                                       | 285.6427504                             | 38.03437967                              |
| 0.064227759                                        | 0.441026992                                       | 507.6220678                             | 73.92615117                              |
| 0.077240138                                        | 0.394707266                                       | 335.5011765                             | 65.65411765                              |
| 0.045434892                                        | 0.484850532                                       | 618.669279                              | 57.97492163                              |
| 0.074224377                                        | 0.405803324                                       | 154.2052632                             | 28.20526316                              |
| 0.050618663                                        | 0.482330792                                       | 562.8800343                             | 59.07197943                              |
| 0.056383608                                        | 0.483358332                                       | 479.9748238                             | 55.98892246                              |
| 0.065517409                                        | 0.424085707                                       | 235.3675676                             | 36.36216216                              |
| 0.049897796                                        | 0.472671347                                       | 413.5874286                             | 43.66057143                              |
| 0.074192328                                        | 0.442272606                                       | 187.5235849                             | 31.45754717                              |
| 0.043405096                                        | 0.507769744                                       | 693.61347                               | 59.29136164                              |
| 0.045217774                                        | 0.488748823                                       | 1372.406695                             | 126.97151                                |
| 0.048964304                                        | 0.481849135                                       | 765.6582756                             | 77.80427942                              |
| 0.054152871                                        | 0.467509404                                       | 923.798583                              | 107.0060729                              |
| 0.043014655                                        | 0.520729705                                       | 957.101197                              | 79.0609358                               |
| 0.055259894                                        | 0.450772486                                       | 519.7406765                             | 63.71465742                              |
| 0.050489499                                        | 0.490634755                                       | 212.9354839                             | 21.9124424                               |
| 0.062440981                                        | 0.431527125                                       | 132.4788274                             | 19.16938111                              |
| 0.049815816                                        | 0.451843639                                       | 1165.756589                             | 128.5248062                              |

| wavelet.HHL_glszm_LargeAreaEmphasis | wavelet.HHL_glszm_ZoneVariance | wavelet.HHL_glszm_ZonePercentage | wavelet.HHL_glszm_LargeAreaLowGrayLevelEmphasis | wavelet.HHL_glszm_LargeAreaHighGrayLevelEmphasis |
|-------------------------------------|--------------------------------|----------------------------------|-------------------------------------------------|--------------------------------------------------|
| 5.649961449                         | 2.973129286                    | 0.611215834                      | 0.00875671                                      | 4713.65613                                       |
| 16.94209354                         | 12.60568152                    | 0.480213904                      | 0.037390694                                     | 8528.22049                                       |
| 35.34587554                         | 30.41760405                    | 0.450456323                      | 0.141124669                                     | 9469.976845                                      |
| 23.92307692                         | 18.736575                      | 0.439099284                      | 0.060661285                                     | 10363.21678                                      |
| 37.41371681                         | 30.55209883                    | 0.381756757                      | 0.226487003                                     | 6639.574115                                      |
| 7.378917379                         | 3.843231792                    | 0.531818182                      | 0.047732767                                     | 1607.512821                                      |
| 47.58230153                         | 43.34733923                    | 0.485931694                      | 0.074627119                                     | 31118.94283                                      |
| 59.81090545                         | 53.28146164                    | 0.391346907                      | 0.110851075                                     | 32959.06103                                      |
| 50.69193742                         | 43.21029714                    | 0.365596128                      | 0.095235118                                     | 27588.787                                        |
| 7.18196695                          | 3.979124919                    | 0.558768657                      | 0.02340208                                      | 3011.230384                                      |
| 20.3897281                          | 15.20069185                    | 0.438992042                      | 0.11137154                                      | 4207.651057                                      |
| 14.5996457                          | 10.43139362                    | 0.489804772                      | 0.020718961                                     | 11171.94154                                      |
| 272.6696751                         | 261.3125318                    | 0.296732726                      | 0.494331957                                     | 151844.7112                                      |
| 43.65275708                         | 37.1049549                     | 0.390797903                      | 0.13637269                                      | 14736.90462                                      |
| 11.0125847                          | 7.323805231                    | 0.520665323                      | 0.016563088                                     | 8422.694095                                      |
| 30.37848411                         | 25.79951196                    | 0.467321755                      | 0.061556215                                     | 15732.42934                                      |
| 6.801829268                         | 3.488895351                    | 0.549413735                      | 0.015832643                                     | 3840.083841                                      |
| 121.5329815                         | 110.9490327                    | 0.307380373                      | 0.271734352                                     | 55413.89182                                      |
| 64.58165548                         | 56.14958285                    | 0.344375963                      | 0.533210628                                     | 8204.418345                                      |
| 13.21122995                         | 9.267561911                    | 0.503558377                      | 0.013878802                                     | 14090.49656                                      |
| 947.5930736                         | 928.5517513                    | 0.229166667                      | 6.2609654                                       | 145157.9524                                      |
| 18.894                              | 14.237036                      | 0.46339203                       | 0.086939267                                     | 4507.646                                         |
| 7.351724138                         | 4.234673008                    | 0.56640625                       | 0.018813683                                     | 3716.801724                                      |
| 31.37768595                         | 26.59207773                    | 0.457121269                      | 0.108219625                                     | 9610.820661                                      |
| 16.90551181                         | 12.88659185                    | 0.498821681                      | 0.034695996                                     | 9581.113386                                      |
| 42.0360238                          | 36.70473441                    | 0.433094133                      | 0.088555674                                     | 21342.5039                                       |
| 20.49724096                         | 16.56804682                    | 0.504484998                      | 0.057639417                                     | 7996.924586                                      |
| 70.29550205                         | 64.59682859                    | 0.41889348                       | 0.190298764                                     | 26785.84529                                      |
| 7.482608696                         | 3.705500945                    | 0.514541387                      | 0.024159072                                     | 3142.204348                                      |
| 23.87196468                         | 18.73218524                    | 0.441090555                      | 0.085179337                                     | 7211.312362                                      |
| 603.2684284                         | 592.3205213                    | 0.302227827                      | 2.235723286                                     | 164055.3324                                      |
| 15.17097967                         | 11.51447224                    | 0.522957951                      | 0.030479411                                     | 8321.657116                                      |
| 13.7865099                          | 9.793932197                    | 0.50046454                       | 0.027033557                                     | 7782.225866                                      |
| 13.45539178                         | 10.13162999                    | 0.548510638                      | 0.033909097                                     | 6798.162917                                      |
| 36.67168999                         | 31.05341229                    | 0.421889192                      | 0.136634447                                     | 10418.23897                                      |
| 74.88597285                         | 67.52002948                    | 0.368456152                      | 0.184591615                                     | 31056.16652                                      |
| 74.91152263                         | 68.39817449                    | 0.391830153                      | 0.067404788                                     | 84830.03361                                      |
| 78.31502289                         | 73.70227014                    | 0.46560744                       | 0.075180601                                     | 82835.79442                                      |
| 7.440242057                         | 3.977602358                    | 0.537398374                      | 0.032529604                                     | 2277.655068                                      |
| 10.02267335                         | 6.348978015                    | 0.52173315                       | 0.013202001                                     | 8230.791985                                      |
| 287.2367758                         | 276.5634704                    | 0.306090979                      | 1.405256801                                     | 59543.8199                                       |
| 8.355461394                         | 5.04079886                     | 0.549262995                      | 0.02048167                                      | 3960.99435                                       |
| 191.8460993                         | 185.1339575                    | 0.385984123                      | 0.473567105                                     | 78326.97518                                      |
| 5.433687003                         | 2.711624651                    | 0.606109325                      | 0.017426202                                     | 2371.93634                                       |
| 9.310447761                         | 5.672033861                    | 0.524256651                      | 0.02949412                                      | 3593.685075                                      |
| 9.221509972                         | 5.398983673                    | 0.51147541                       | 0.020043093                                     | 4780.891738                                      |
| 67.4676007                          | 60.375158                      | 0.375493205                      | 0.12554068                                      | 36982.74898                                      |
| 16.61989796                         | 11.68288604                    | 0.450057405                      | 0.022207504                                     | 14649.61735                                      |
| 12.1942446                          | 8.02951308                     | 0.490011751                      | 0.039124493                                     | 4574.58753                                       |
| 48.70609319                         | 42.83545946                    | 0.412721893                      | 0.190037588                                     | 13105.35305                                      |
| 8.244161359                         | 4.938610186                    | 0.550019463                      | 0.020876507                                     | 3914.014154                                      |
| 6.60469854                          | 3.534689025                    | 0.570750519                      | 0.015174429                                     | 3427.449584                                      |
| 17.24173749                         | 12.70350991                    | 0.469414894                      | 0.040872682                                     | 7841.431539                                      |
| 129.2654321                         | 117.6550069                    | 0.293478261                      | 0.857923471                                     | 20057.20679                                      |
| 37.64879852                         | 31.60501707                    | 0.406766917                      | 0.065617373                                     | 23273.21442                                      |
| 12.98294243                         | 8.661153568                    | 0.481025641                      | 0.025693783                                     | 7266.49467                                       |
| 13.52423954                         | 9.828123645                    | 0.520148331                      | 0.022665623                                     | 8685.901616                                      |
| 13.79868709                         | 10.22021532                    | 0.528629265                      | 0.014466791                                     | 14421.53556                                      |
| 53.63636364                         | 46.96410216                    | 0.387135922                      | 0.147822978                                     | 20128.27116                                      |
| 99.29887579                         | 93.03309946                    | 0.399496111                      | 0.198383509                                     | 50269.50617                                      |
| 5.764705882                         | 2.864533011                    | 0.587202718                      | 0.014365647                                     | 3133.038573                                      |
| 11.27965492                         | 7.595242291                    | 0.520973783                      | 0.008267598                                     | 17516.34148                                      |
| 29.9282854                          | 25.4871933                     | 0.474520643                      | 0.040797265                                     | 22647.32181                                      |
| 8.664275111                         | 5.107476947                    | 0.530237439                      | 0.0194364                                       | 4414.960168                                      |
| 91.26164875                         | 83.24402307                    | 0.353164557                      | 0.449723356                                     | 19082.31183                                      |
| 159.002809                          | 151.6474384                    | 0.36872087                       | 0.389808235                                     | 65591.09551                                      |
| 15.21266968                         | 11.34429862                    | 0.508435583                      | 0.040135892                                     | 6829.088989                                      |
| 7.682988961                         | 4.553504786                    | 0.56528                          | 0.013562266                                     | 5525.078687                                      |
| 33.26807692                         | 28.19345429                    | 0.443913266                      | 0.080486168                                     | 14173.78769                                      |
| 23.30775134                         | 18.36113838                    | 0.449620428                      | 0.048652436                                     | 11748.6815                                       |
| 23.27798507                         | 17.40459665                    | 0.412625096                      | 0.059406496                                     | 9818.539179                                      |
| 16.67599278                         | 12.9282043                     | 0.516550117                      | 0.018968908                                     | 15723.60108                                      |
| 76.39126016                         | 71.02714055                    | 0.431768319                      | 0.130321789                                     | 45824.84654                                      |
| 9.497524752                         | 6.023545486                    | 0.536520584                      | 0.017429996                                     | 6196.513201                                      |
| 17.48627951                         | 13.49393379                    | 0.50047908                       | 0.042188894                                     | 7974.869177                                      |
| 8.417266187                         | 4.68875524                     | 0.517883756                      | 0.045745682                                     | 2054.991367                                      |
| 19.39393939                         | 15.09055977                    | 0.482053422                      | 0.02346803                                      | 17257.7671                                       |
| 43.65096953                         | 36.6086356                     | 0.376826722                      | 0.076766899                                     | 26178.65928                                      |
| 48.48837209                         | 41.4843483                     | 0.377855888                      | 0.290454567                                     | 8494.184496                                      |
| 6.097293343                         | 3.169614634                    | 0.584437794                      | 0.014440033                                     | 3482.087052                                      |
| 5.143429487                         | 2.603390425                    | 0.62745098                       | 0.010364068                                     | 3734.307692                                      |
| 53.53512706                         | 46.30393175                    | 0.371873263                      | 0.23364443                                      | 12878.75785                                      |
| 159.3770634                         | 151.3106738                    | 0.352095442                      | 0.898804917                                     | 28889.41442                                      |
| 214.7117647                         | 201.6414131                    | 0.276602668                      | 1.416204031                                     | 33341.51882                                      |
| 9.776645768                         | 6.123035225                    | 0.523165232                      | 0.021516776                                     | 5085.083856                                      |
| 520.7894737                         | 504.5358449                    | 0.248041775                      | 2.873584211                                     | 95445.77105                                      |
| 26.80291345                         | 22.62619641                    | 0.489308176                      | 0.068887892                                     | 11104.82776                                      |
| 201.8126888                         | 194.1877493                    | 0.36214442                       | 0.374058786                                     | 110018.7291                                      |
| 41.45945946                         | 34.501271                      | 0.379098361                      | 0.209083451                                     | 8662.74955                                       |
| 45.47085714                         | 40.11493878                    | 0.432098765                      | 0.114346123                                     | 18973.32343                                      |
| 165.8584906                         | 156.3999644                    | 0.325153374                      | 0.620036562                                     | 45591.14623                                      |
| 6.850658858                         | 3.809899054                    | 0.573467674                      | 0.007478267                                     | 7359.877745                                      |
| 10.28739316                         | 6.880423936                    | 0.541771175                      | 0.017669509                                     | 6597.246439                                      |
| 14.44052863                         | 10.12752241                    | 0.481515152                      | 0.020652628                                     | 10816.17369                                      |
| 18.47975709                         | 13.62906293                    | 0.454044118                      | 0.0295935                                       | 12121.25607                                      |
| 14.26985854                         | 10.8035358                     | 0.5371128                        | 0.023775721                                     | 9374.726877                                      |
| 40.44492628                         | 34.47574072                    | 0.409300674                      | 0.088712555                                     | 19155.98526                                      |
| 85.99769585                         | 80.17781754                    | 0.41451767                       | 0.207721684                                     | 36595.6106                                       |
| 73.58306189                         | 66.20307908                    | 0.368105516                      | 0.181032197                                     | 30951.30293                                      |
| 27.9372093                          | 22.9286347                     | 0.44683062                       | 0.052619245                                     | 15480.70039                                      |



| wavelet.HHL_glszm_HighGrayLevelZoneEmphasis | wavelet.HHL_glszm_SmallAreaEmphasis | wavelet.HHL_glszm_LowGrayLevelZoneEmphasis | wavelet.HHL_glszm_ZoneEntropy | wavelet.HHL_glszm_SmallAreaLowGrayLevelEmphasis |
|---------------------------------------------|-------------------------------------|--------------------------------------------|-------------------------------|-------------------------------------------------|
| 887.1187355                                 | 0.764859647                         | 0.002669219                                | 6.307319653                   | 0.002330343                                     |
| 563.8129176                                 | 0.724241063                         | 0.004647117                                | 5.948522377                   | 0.004012342                                     |
| 305.8017366                                 | 0.688927543                         | 0.007968279                                | 6.024481667                   | 0.006231634                                     |
| 447.5221445                                 | 0.709653685                         | 0.006034655                                | 6.048667374                   | 0.005220154                                     |
| 211.3274336                                 | 0.670183442                         | 0.009395186                                | 5.859485029                   | 0.007160377                                     |
| 228.6267806                                 | 0.703006597                         | 0.013626376                                | 5.76159104                    | 0.011517867                                     |
| 700.274217                                  | 0.719745396                         | 0.002481509                                | 6.277215292                   | 0.001988567                                     |
| 585.2186093                                 | 0.70259375                          | 0.002990494                                | 6.276039261                   | 0.002378378                                     |
| 573.3297232                                 | 0.687666288                         | 0.002742404                                | 6.037970894                   | 0.002133963                                     |
| 497.9465776                                 | 0.741401408                         | 0.005676052                                | 6.088426695                   | 0.004569207                                     |
| 243.8096677                                 | 0.701099202                         | 0.01002419                                 | 5.943748125                   | 0.008226599                                     |
| 779.7077059                                 | 0.742161261                         | 0.00256973                                 | 6.132028493                   | 0.00220378                                      |
| 604.9151625                                 | 0.71805751                          | 0.004277298                                | 5.834602244                   | 0.003700613                                     |
| 383.6661699                                 | 0.673691285                         | 0.006602694                                | 6.078870092                   | 0.005478928                                     |
| 798.2787996                                 | 0.733262048                         | 0.003014923                                | 6.277568798                   | 0.002614875                                     |
| 532.8689487                                 | 0.712401334                         | 0.003399662                                | 6.26991522                    | 0.002687585                                     |
| 595.3414634                                 | 0.714470019                         | 0.00529125                                 | 6.134885837                   | 0.003918326                                     |
| 491.4854881                                 | 0.679088647                         | 0.002543982                                | 5.887643945                   | 0.004467037                                     |
| 146.5861298                                 | 0.653488732                         | 0.013943031                                | 5.645217037                   | 0.010736546                                     |
| 1111.956455                                 | 0.730390298                         | 0.001994855                                | 6.421503118                   | 0.001685201                                     |
| 166.4718615                                 | 0.664399475                         | 0.011403029                                | 5.61196017                    | 0.007419731                                     |
| 271.77                                      | 0.696983371                         | 0.008360285                                | 5.864492172                   | 0.006819345                                     |
| 559.8913793                                 | 0.730023408                         | 0.00468489                                 | 6.145966598                   | 0.003960395                                     |
| 349.0371901                                 | 0.705412692                         | 0.005579931                                | 6.017597361                   | 0.004379386                                     |
| 579.3748031                                 | 0.722812415                         | 0.004965709                                | 6.204203918                   | 0.004163009                                     |
| 544.8138402                                 | 0.70836491                          | 0.003548648                                | 6.026006812                   | 0.002156598                                     |
| 419.8687922                                 | 0.716206773                         | 0.005194166                                | 6.207201653                   | 0.004169217                                     |
| 419.4174589                                 | 0.70524341                          | 0.005580187                                | 6.12296055                    | 0.004633625                                     |
| 451.4652174                                 | 0.708035044                         | 0.007394726                                | 5.716452826                   | 0.006637559                                     |
| 346.6931567                                 | 0.703526951                         | 0.006129055                                | 6.043626006                   | 0.004911233                                     |
| 307.8977747                                 | 0.699381731                         | 0.005873697                                | 5.933935218                   | 0.004574901                                     |
| 614.6118299                                 | 0.738919986                         | 0.003399476                                | 6.263179222                   | 0.002864359                                     |
| 607.950495                                  | 0.723053166                         | 0.003344105                                | 6.267127227                   | 0.002772039                                     |
| 558.7315749                                 | 0.75681228                          | 0.004770559                                | 6.240889147                   | 0.00351245                                      |
| 303.6081808                                 | 0.704065404                         | 0.00707226                                 | 6.014069073                   | 0.005742072                                     |
| 451.1954751                                 | 0.713490894                         | 0.004162373                                | 6.089075201                   | 0.003340195                                     |
| 1182.967764                                 | 0.736551991                         | 0.001778315                                | 6.242886186                   | 0.001523318                                     |
| 1119.685809                                 | 0.724776755                         | 0.001624759                                | 6.441724855                   | 0.0013246                                       |
| 352.0438729                                 | 0.709344347                         | 0.008356245                                | 5.978057777                   | 0.007090311                                     |
| 853.6994463                                 | 0.723820638                         | 0.001816963                                | 6.245389521                   | 0.00144443                                      |
| 235.0100756                                 | 0.68761003                          | 0.008930757                                | 5.848971226                   | 0.006851039                                     |
| 496.240113                                  | 0.738520102                         | 0.003784254                                | 6.108802298                   | 0.003108969                                     |
| 468.1843972                                 | 0.688322326                         | 0.003761441                                | 6.091164388                   | 0.002914039                                     |
| 473.311008                                  | 0.756829489                         | 0.005575928                                | 6.151671218                   | 0.00408425                                      |
| 438.2686567                                 | 0.713680505                         | 0.005572224                                | 6.090532579                   | 0.004622359                                     |
| 553.2229345                                 | 0.715193835                         | 0.003159374                                | 6.107800326                   | 0.00251279                                      |
| 586.6976065                                 | 0.70143151                          | 0.002762864                                | 6.056327246                   | 0.002175058                                     |
| 947.877551                                  | 0.711248347                         | 0.00414968                                 | 5.990883943                   | 0.003798805                                     |
| 414.4892086                                 | 0.688253865                         | 0.007333403                                | 5.967615775                   | 0.00631731                                      |
| 306.3387097                                 | 0.716516138                         | 0.008643623                                | 5.876640684                   | 0.007435723                                     |
| 522.5930644                                 | 0.740221825                         | 0.0043152                                  | 6.177044296                   | 0.003660194                                     |
| 560.0467775                                 | 0.737307256                         | 0.003402687                                | 6.149746916                   | 0.002809143                                     |
| 499.3101983                                 | 0.707414589                         | 0.003642531                                | 6.190629078                   | 0.002898518                                     |
| 177.2160494                                 | 0.663512866                         | 0.01262617                                 | 5.627736478                   | 0.010058982                                     |
| 594.1700555                                 | 0.711038912                         | 0.005345427                                | 6.127489644                   | 0.004695596                                     |
| 613.7046908                                 | 0.705972357                         | 0.003299614                                | 6.167088342                   | 0.002701342                                     |
| 691.1178707                                 | 0.718227961                         | 0.002424182                                | 6.205429731                   | 0.001933445                                     |
| 1107.486324                                 | 0.727970706                         | 0.001809443                                | 6.355443783                   | 0.001512768                                     |
| 415.6755486                                 | 0.699982585                         | 0.005064867                                | 5.923391715                   | 0.004226475                                     |
| 528.2944886                                 | 0.689474607                         | 0.002691392                                | 6.158188974                   | 0.002013603                                     |
| 610.7000964                                 | 0.741588103                         | 0.004394096                                | 6.145594863                   | 0.003820392                                     |
| 1624.617541                                 | 0.731241288                         | 0.001499929                                | 6.378931833                   | 0.001312617                                     |
| 804.4066254                                 | 0.734437868                         | 0.001998918                                | 6.237384867                   | 0.001598883                                     |
| 552.6078674                                 | 0.720141498                         | 0.003275367                                | 6.223381892                   | 0.002637346                                     |
| 237.0394265                                 | 0.692241276                         | 0.011038995                                | 5.577327911                   | 0.009257966                                     |
| 451.241573                                  | 0.69962233                          | 0.003688382                                | 6.034754214                   | 0.002875378                                     |
| 512.3423831                                 | 0.737165494                         | 0.0068919                                  | 6.1154992                     | 0.006182664                                     |
| 762.3988112                                 | 0.745267045                         | 0.002771163                                | 6.322251526                   | 0.002141767                                     |
| 443.5307692                                 | 0.706861259                         | 0.003318746                                | 5.950951007                   | 0.002539138                                     |
| 539.171911                                  | 0.687241906                         | 0.003313814                                | 6.132956918                   | 0.002618787                                     |
| 451.7705224                                 | 0.68811237                          | 0.004812074                                | 5.970046563                   | 0.003961519                                     |
| 990.9210289                                 | 0.726292238                         | 0.001851363                                | 6.436420683                   | 0.001505492                                     |
| 654.9796748                                 | 0.733270792                         | 0.003387926                                | 6.204875839                   | 0.002865483                                     |
| 699.8688119                                 | 0.731854392                         | 0.003684032                                | 6.18311324                    | 0.00321105                                      |
| 512.535418                                  | 0.720605319                         | 0.003853911                                | 6.228745993                   | 0.003082739                                     |
| 272.1726619                                 | 0.690174085                         | 0.010856695                                | 5.981727645                   | 0.009086157                                     |
| 926.0363636                                 | 0.732349259                         | 0.002408896                                | 6.252857211                   | 0.002068804                                     |
| 623.933518                                  | 0.700524974                         | 0.004816968                                | 5.928571337                   | 0.004261406                                     |
| 208.7984496                                 | 0.677979495                         | 0.009965769                                | 5.775013801                   | 0.007836759                                     |
| 596.8917337                                 | 0.745388725                         | 0.004593477                                | 6.175648417                   | 0.004037624                                     |
| 772.3782051                                 | 0.73749679                          | 0.003944445                                | 6.255623406                   | 0.00355011                                      |
| 273.4394619                                 | 0.678932606                         | 0.008238265                                | 5.994357372                   | 0.006550906                                     |
| 207.5065161                                 | 0.690216785                         | 0.010870679                                | 5.876873893                   | 0.008488372                                     |
| 171.5576471                                 | 0.652704288                         | 0.010702648                                | 5.763970542                   | 0.008037102                                     |
| 560.3526646                                 | 0.724003655                         | 0.003331446                                | 6.1751037                     | 0.002705408                                     |
| 218.5289474                                 | 0.661427299                         | 0.010594198                                | 5.734657505                   | 0.00804246                                      |
| 465.7832048                                 | 0.722116266                         | 0.004299071                                | 6.030549254                   | 0.003441209                                     |
| 550.9315206                                 | 0.72227984                          | 0.003727958                                | 5.949974177                   | 0.003137706                                     |
| 228.0846847                                 | 0.677043286                         | 0.009895176                                | 5.855800916                   | 0.00809768                                      |
| 451.5817143                                 | 0.714675782                         | 0.005452867                                | 6.121663036                   | 0.004514064                                     |
| 300.0990566                                 | 0.690405611                         | 0.007456662                                | 5.615171948                   | 0.004269196                                     |
| 1115.174963                                 | 0.740546654                         | 0.001821064                                | 6.176591224                   | 0.001559456                                     |
| 696.0235043                                 | 0.726789938                         | 0.002504236                                | 6.204028222                   | 0.002030736                                     |
| 795.5890497                                 | 0.721719183                         | 0.00219211                                 | 6.157479814                   | 0.001788719                                     |
| 688.0541498                                 | 0.710988835                         | 0.002320137                                | 6.112634892                   | 0.001841888                                     |
| 699.8808487                                 | 0.749771965                         | 0.002869157                                | 6.20995182                    | 0.002426916                                     |
| 491.5923677                                 | 0.698005839                         | 0.003881938                                | 6.066966464                   | 0.003151515                                     |
| 463.2396313                                 | 0.728074796                         | 0.006401245                                | 5.943545651                   | 0.005660388                                     |
| 460.6742671                                 | 0.683171914                         | 0.006324276                                | 5.783260304                   | 0.005445967                                     |
| 605.1034884                                 | 0.699150933                         | 0.002780473                                | 6.292580113                   | 0.002141133                                     |

| wavelet.HHL_ngtdm_Coarseness | wavelet.HHL_ngtdm_Complexity | wavelet.HHL_ngtdm_Strength | wavelet.HHL_ngtdm_Busyness | wavelet.HHL_ngtdm_Contrast | wavelet.LLL_gldm_GrayLevelVariance |
|------------------------------|------------------------------|----------------------------|----------------------------|----------------------------|------------------------------------|
| 0.003023285                  | 3.490668414                  | 3.450795489                | 0.165525156                | 8.66E-05                   | 527.2923611                        |
| 0.007787802                  | 2.318063922                  | 3.729490711                | 0.118249858                | 0.0001256                  | 206.0365993                        |
| 0.004497453                  | 0.807022283                  | 1.214077237                | 0.368224488                | 9.26E-05                   | 536.881208                         |
| 0.007140656                  | 2.072709083                  | 3.247070275                | 0.144292464                | 0.000128829                | 703.3279785                        |
| 0.002668864                  | 0.292513361                  | 0.559901575                | 0.917517608                | 3.87E-05                   | 269.5737606                        |
| 0.0096419                    | 1.905362592                  | 2.798305209                | 0.21161542                 | 0.000237128                | 227.606747                         |
| 0.001219301                  | 0.757701371                  | 1.213590012                | 0.441318742                | 1.39E-05                   | 500.6740881                        |
| 0.001413902                  | 0.551659736                  | 1.22464604                 | 0.439069276                | 1.08E-05                   | 261.9309049                        |
| 0.001493643                  | 0.34507252                   | 0.884592848                | 0.54875723                 | 1.09E-05                   | 539.0620804                        |
| 0.006397106                  | 3.575948404                  | 4.616560936                | 0.129006253                | 0.000135741                | 386.2916852                        |
| 0.004309204                  | 0.75894274                   | 1.243601559                | 0.432399417                | 7.48E-05                   | 211.3604965                        |
| 0.002989148                  | 1.552118151                  | 2.506895901                | 0.185343246                | 3.67E-05                   | 241.6737407                        |
| 0.00421551                   | 0.898711605                  | 2.961259445                | 0.162424578                | 2.20E-05                   | 164.476739                         |
| 0.003894527                  | 1.215070087                  | 2.452711079                | 0.242222301                | 3.66E-05                   | 452.2715596                        |
| 0.003530639                  | 2.303752648                  | 2.921826396                | 0.1524335                  | 5.98E-05                   | 326.9066555                        |
| 0.001581196                  | 0.630404316                  | 0.931946566                | 0.508967992                | 2.40E-05                   | 328.1356884                        |
| 0.005590257                  | 2.700354457                  | 3.642815056                | 0.136230603                | 0.00011161                 | 294.0342198                        |
| 0.005582432                  | 0.937124731                  | 2.582022642                | 0.173783746                | 4.30E-05                   | 190.1514883                        |
| 0.004918531                  | 0.53406329                   | 0.761107899                | 0.652949327                | 5.62E-05                   | 198.6539965                        |
| 0.001364957                  | 1.598869096                  | 2.681243555                | 0.227180756                | 1.46E-05                   | 314.7215151                        |
| 0.002265627                  | 0.129067495                  | 0.458898335                | 1.074232586                | 1.21E-05                   | 216.5717746                        |
| 0.006174685                  | 1.138143022                  | 1.985562688                | 0.269222338                | 9.55E-05                   | 215.2047196                        |
| 0.006329851                  | 2.597276568                  | 2.83830239                 | 0.164177361                | 0.000212346                | 283.4921875                        |
| 0.002464242                  | 0.715857852                  | 1.206492741                | 0.46438441                 | 3.19E-05                   | 530.195752                         |
| 0.005319035                  | 2.754244059                  | 3.46265775                 | 0.13750692                 | 0.00011839                 | 241.9351841                        |
| 0.002941701                  | 0.880305893                  | 1.695627839                | 0.266172633                | 2.96E-05                   | 393.492346                         |
| 0.002026544                  | 0.961358624                  | 1.262755855                | 0.450092744                | 3.58E-05                   | 433.8045058                        |
| 0.002649444                  | 0.945788778                  | 1.837226545                | 0.315677371                | 2.56E-05                   | 306.7667818                        |
| 0.012830519                  | 3.085151989                  | 4.793765511                | 0.10849223                 | 0.000361489                | 180.6686786                        |
| 0.003387464                  | 0.900747475                  | 1.686751994                | 0.340074003                | 4.10E-05                   | 195.4847655                        |
| 0.001507339                  | 0.281962824                  | 0.853775789                | 0.738641121                | 8.01E-06                   | 320.1148483                        |
| 0.003159862                  | 1.849309229                  | 2.129366607                | 0.240540904                | 7.46E-05                   | 227.1563509                        |
| 0.002089788                  | 1.144132742                  | 1.615959969                | 0.318832578                | 3.14E-05                   | 352.9794523                        |
| 0.002750768                  | 1.454968422                  | 1.332144181                | 0.33899402                 | 9.59E-05                   | 482.243368                         |
| 0.001503444                  | 0.383846299                  | 0.741017176                | 0.810634134                | 1.53E-05                   | 313.5123727                        |
| 0.002402298                  | 0.85694574                   | 1.273524333                | 0.375776507                | 2.20E-05                   | 271.5732838                        |
| 0.002000742                  | 1.002067043                  | 2.196367645                | 0.198394819                | 1.70E-05                   | 501.151527                         |
| 0.00139325                   | 1.269642443                  | 1.96930182                 | 0.255738786                | 1.66E-05                   | 1204.778632                        |
| 0.005048361                  | 1.622285354                  | 2.078579059                | 0.272619623                | 0.000125283                | 369.6083951                        |
| 0.000891988                  | 0.610798863                  | 0.83458859                 | 0.563399799                | 1.19E-05                   | 344.3993678                        |
| 0.00272563                   | 0.356716204                  | 1.028936705                | 0.561484103                | 1.68E-05                   | 460.8344405                        |
| 0.001689112                  | 0.777749309                  | 0.939577351                | 0.515288252                | 3.17E-05                   | 606.7464602                        |
| 0.001956461                  | 0.527048249                  | 1.09789324                 | 0.445428935                | 1.64E-05                   | 425.9525391                        |
| 0.002506441                  | 1.60660053                   | 1.583590695                | 0.361040748                | 7.13E-05                   | 432.1534543                        |
| 0.005003561                  | 1.817046105                  | 2.069208041                | 0.235800431                | 0.000137635                | 226.6113621                        |
| 0.002295503                  | 0.739787282                  | 0.952680112                | 0.436875746                | 4.92E-05                   | 281.0314689                        |
| 0.001483107                  | 0.513037317                  | 1.304441312                | 0.441923169                | 9.19E-06                   | 354.3726153                        |
| 0.007466776                  | 4.743403164                  | 10.11331739                | 0.064507998                | 0.000114602                | 176.4476399                        |
| 0.007972164                  | 2.263920851                  | 3.546522716                | 0.14001992                 | 0.000145108                | 245.7348001                        |
| 0.005256835                  | 1.252042123                  | 2.667394733                | 0.22060853                 | 5.26E-05                   | 140.4972953                        |
| 0.002460397                  | 1.875677902                  | 2.358670186                | 0.275965627                | 4.32E-05                   | 362.4153141                        |
| 0.002024298                  | 1.006175707                  | 1.326741678                | 0.381498282                | 3.58E-05                   | 461.9076997                        |
| 0.001488288                  | 0.625938122                  | 1.037632082                | 0.525486919                | 1.76E-05                   | 277.8178887                        |
| 0.005906546                  | 0.466169365                  | 1.16315294                 | 0.419017765                | 4.94E-05                   | 422.9174272                        |
| 0.004989765                  | 1.781876959                  | 3.546580128                | 0.135966709                | 6.55E-05                   | 265.900255                         |
| 0.00346614                   | 1.275695962                  | 2.214959956                | 0.225122437                | 4.97E-05                   | 171.0214396                        |
| 0.001652832                  | 0.846571955                  | 1.138315615                | 0.412521588                | 2.82E-05                   | 502.1188239                        |
| 0.002002763                  | 1.676370904                  | 2.100986385                | 0.205519369                | 3.32E-05                   | 455.6947172                        |
| 0.003948996                  | 0.916997628                  | 1.815778337                | 0.264885797                | 4.04E-05                   | 233.4159407                        |
| 0.000789469                  | 0.209055069                  | 0.433934555                | 1.001891529                | 5.93E-06                   | 928.6268596                        |
| 0.003447752                  | 2.138272215                  | 2.158177506                | 0.24116013                 | 0.000101818                | 248.0180495                        |
| 0.002684764                  | 2.530733546                  | 3.583625249                | 0.112339752                | 3.86E-05                   | 306.322065                         |
| 0.001185701                  | 0.772599856                  | 1.289081378                | 0.406834432                | 1.27E-05                   | 177.2877898                        |
| 0.000844709                  | 0.479322882                  | 0.645112245                | 0.849913198                | 1.30E-05                   | 379.5271869                        |
| 0.008670366                  | 1.042993765                  | 3.057447956                | 0.218024254                | 9.19E-05                   | 177.2625797                        |
| 0.00185657                   | 0.40653154                   | 0.877634396                | 0.518851793                | 1.60E-05                   | 239.4599976                        |
| 0.005324465                  | 2.345630042                  | 3.101122792                | 0.159226718                | 0.000105211                | 194.3492551                        |
| 0.001047059                  | 1.034419085                  | 1.222856915                | 0.484867471                | 1.91E-05                   | 375.9651296                        |
| 0.001127817                  | 0.274569568                  | 0.543895038                | 0.863555657                | 1.06E-05                   | 883.9385972                        |
| 0.002254851                  | 0.777646098                  | 1.326092273                | 0.374497568                | 3.02E-05                   | 208.3045803                        |
| 0.005327434                  | 0.876427114                  | 1.674509849                | 0.228667853                | 7.09E-05                   | 359.6152497                        |
| 0.00165212                   | 1.397590934                  | 1.951528545                | 0.251947653                | 2.45E-05                   | 301.7185477                        |
| 0.00323401                   | 1.355715483                  | 2.390128079                | 0.194192547                | 4.14E-05                   | 365.6460196                        |
| 0.003027136                  | 1.547406807                  | 2.108288374                | 0.223898426                | 5.49E-05                   | 404.248094                         |
| 0.002094997                  | 0.903779335                  | 1.076506277                | 0.428304717                | 4.36E-05                   | 394.7418544                        |
| 0.004605637                  | 1.043527842                  | 1.366000486                | 0.400274258                | 0.000115964                | 305.7026504                        |
| 0.002877529                  | 2.079305541                  | 3.261388642                | 0.150156495                | 3.54E-05                   | 402.6347969                        |
| 0.007601912                  | 1.521228419                  | 3.294492005                | 0.116160741                | 9.05E-05                   | 109.986101                         |
| 0.003709297                  | 0.474942997                  | 1.016868688                | 0.536279016                | 3.82E-05                   | 338.7832245                        |
| 0.002653973                  | 1.722847193                  | 1.816158646                | 0.288503743                | 7.18E-05                   | 689.3472529                        |
| 0.00322318                   | 3.262346168                  | 3.155628566                | 0.183267078                | 0.000103958                | 581.634218                         |
| 0.003958875                  | 0.650556322                  | 1.298236028                | 0.378536726                | 4.24E-05                   | 355.6670023                        |
| 0.002173859                  | 0.288368438                  | 0.687483602                | 0.815662181                | 1.85E-05                   | 774.3617905                        |
| 0.002097149                  | 0.152237435                  | 0.385594123                | 1.25253259                 | 1.79E-05                   | 398.7612981                        |
| 0.002551387                  | 1.088566983                  | 1.211626014                | 0.377807905                | 6.76E-05                   | 271.407666                         |
| 0.004766631                  | 0.518699014                  | 2.257548915                | 0.35633144                 | 2.32E-05                   | 73.90632563                        |
| 0.002805665                  | 0.952290022                  | 1.429512234                | 0.33804782                 | 4.36E-05                   | 644.3002933                        |
| 0.002558502                  | 0.688630802                  | 1.696731174                | 0.282048465                | 1.94E-05                   | 263.4772693                        |
| 0.004668245                  | 0.662530505                  | 1.504971385                | 0.36181334                 | 4.38E-05                   | 267.9309657                        |
| 0.003506759                  | 1.26421705                   | 2.305061614                | 0.237486606                | 4.34E-05                   | 275.0388768                        |
| 0.005315697                  | 0.850500241                  | 2.601249144                | 0.233849771                | 3.41E-05                   | 155.3187996                        |
| 0.002698202                  | 2.012876999                  | 2.404037722                | 0.176678644                | 5.49E-05                   | 496.2700517                        |
| 0.001232642                  | 0.866429636                  | 1.047775278                | 0.479189822                | 1.98E-05                   | 293.8083524                        |
| 0.001994573                  | 0.9355024                    | 1.473927591                | 0.30019094                 | 2.55E-05                   | 403.2221153                        |
| 0.001515577                  | 0.647693798                  | 1.206963804                | 0.407553091                | 1.32E-05                   | 370.7590727                        |
| 0.001974788                  | 1.382438866                  | 1.755404516                | 0.294746053                | 3.32E-05                   | 404.1581933                        |
| 0.002453002                  | 0.787191589                  | 1.586466098                | 0.321343061                | 2.10E-05                   | 672.1076919                        |
| 0.007395557                  | 1.746761023                  | 3.559433087                | 0.123920063                | 8.00E-05                   | 623.8564124                        |
| 0.008474816                  | 1.951610787                  | 5.66008356                 | 0.122126108                | 0.000102909                | 214.4860586                        |
| 0.001168188                  | 0.667619887                  | 1.245790247                | 0.493484378                | 1.08E-05                   | 315.1898499                        |

| wavelet.LLL_gldm_HighGrayLevelEmphasis | wavelet.LLL_gldm_GrayLevelNonUniformityNormalized | wavelet.LLL_gldm_DependenceEntropy | wavelet.LLL_gldm_DependenceNonUniformity | wavelet.LLL_gldm_GrayLevelNonUniformity |
|----------------------------------------|---------------------------------------------------|------------------------------------|------------------------------------------|-----------------------------------------|
| 2054.989632                            | 0.015079669                                       | 7.532109688                        | 31.99905749                              |                                         |
| 678.4363636                            | 0.035122537                                       | 6.867994893                        | 279.0064171                              | 32.83957219                             |
| 1961.328553                            | 0.015896099                                       | 7.934540395                        | 422.9022164                              | 24.38461538                             |
| 1868.463664                            | 0.019640053                                       | 7.413751066                        | 354.2487206                              | 19.18833163                             |
| 911.0021115                            | 0.024635198                                       | 7.339963021                        | 761.9771959                              | 58.33614865                             |
| 922.5681818                            | 0.028526171                                       | 6.841807146                        | 239                                      | 18.82727273                             |
| 2730.749779                            | 0.013201592                                       | 8.074354469                        | 1879.328084                              | 74.6021943                              |
| 997.7018403                            | 0.030007132                                       | 7.419367805                        | 1395.139781                              | 153.2764291                             |
| 2428.07919                             | 0.018540397                                       | 7.772729538                        | 1531.113066                              | 84.28464584                             |
| 1209.210821                            | 0.023004149                                       | 7.234959937                        | 383.2518657                              | 24.66044776                             |
| 1137.973475                            | 0.021403092                                       | 7.258831378                        | 520.7480106                              | 32.27586207                             |
| 1202.458568                            | 0.023602938                                       | 7.251111557                        | 816.3908894                              | 54.40477223                             |
| 454.5704339                            | 0.052217223                                       | 7.141270808                        | 337.1360471                              | 97.48955544                             |
| 1337.030868                            | 0.02428251                                        | 7.333026536                        | 575.1875364                              | 41.69306931                             |
| 1707.34375                             | 0.023845502                                       | 7.365761249                        | 679.5725806                              | 47.30947581                             |
| 2808.567185                            | 0.019146838                                       | 7.991946288                        | 1217.001371                              | 83.78656307                             |
| 1814.185092                            | 0.021113384                                       | 7.261502471                        | 445.7470687                              | 25.20938023                             |
| 611.8158962                            | 0.034795358                                       | 7.069559579                        | 322.9805353                              | 42.9026764                              |
| 776.0600924                            | 0.027342053                                       | 7.145649462                        | 388.587057                               | 35.48998459                             |
| 1919.140796                            | 0.021618484                                       | 7.544716767                        | 1761.467782                              | 112.3944989                             |
| 561.0522487                            | 0.034794177                                       | 7.429341393                        | 662.0178571                              | 105.2175926                             |
| 905.4476367                            | 0.025710313                                       | 7.063939312                        | 364.0732159                              | 27.74142725                             |
| 874.5898438                            | 0.029983521                                       | 7.118810432                        | 304.8007813                              | 30.703125                               |
| 2271.421232                            | 0.014114246                                       | 7.845698131                        | 936.8141292                              | 37.36040801                             |
| 1066.477612                            | 0.032852852                                       | 7.102691581                        | 363.290652                               | 41.82168107                             |
| 2108.340228                            | 0.01511236                                        | 7.588647443                        | 987.220346                               | 35.80118193                             |
| 2993.169193                            | 0.013737182                                       | 7.822271727                        | 1235.78008                               | 44.41231055                             |
| 1658.061188                            | 0.024256998                                       | 7.407881766                        | 904.3475742                              | 66.99782766                             |
| 1234.085011                            | 0.028642353                                       | 6.729151397                        | 151.6219239                              | 12.80313199                             |
| 732.0589094                            | 0.024409588                                       | 7.197969343                        | 668.4693281                              | 50.13729309                             |
| 1032.689901                            | 0.027961314                                       | 7.511471172                        | 1291.911307                              | 133.0399327                             |
| 891.2460126                            | 0.021065647                                       | 7.534001394                        | 601.257129                               | 43.58482359                             |
| 3877.492103                            | 0.015773072                                       | 7.704739701                        | 1267.074946                              | 50.93124806                             |
| 2600.984681                            | 0.013632956                                       | 7.858950761                        | 865.6953191                              | 32.03744681                             |
| 1325.832879                            | 0.018639854                                       | 7.614312371                        | 1526.886467                              | 82.08991826                             |
| 710.9083028                            | 0.03717956                                        | 7.300867332                        | 717.5301767                              | 111.5015005                             |
| 1176.802204                            | 0.034120499                                       | 7.413360052                        | 918.3249127                              | 126.9623757                             |
| 5089.345476                            | 0.011136052                                       | 8.62828008                         | 1413.812246                              | 57.47316412                             |
| 1958.765041                            | 0.016170269                                       | 7.559974765                        | 447.7056911                              | 19.88943089                             |
| 2948.697524                            | 0.014826244                                       | 7.866040313                        | 2671.015131                              | 107.786795                              |
| 1322.915574                            | 0.024882461                                       | 7.506515483                        | 807.1002313                              | 64.54510409                             |
| 6204.549004                            | 0.011376925                                       | 7.807923732                        | 1858.622446                              | 43.99456943                             |
| 1721.223378                            | 0.018313662                                       | 7.673983189                        | 1297.487818                              | 66.89980838                             |
| 2317.835209                            | 0.01417673                                        | 7.746380597                        | 970.6567524                              | 35.27170418                             |
| 1443.627543                            | 0.019485895                                       | 7.36826302                         | 447.2535211                              | 24.9029734                              |
| 2643.239344                            | 0.018465632                                       | 7.598455446                        | 965.4655738                              | 50.68816029                             |
| 1486.085927                            | 0.019106909                                       | 7.664907314                        | 1503.251206                              | 87.16571679                             |
| 712.282434                             | 0.026034712                                       | 7.004205132                        | 294.5292767                              | 22.67623421                             |
| 1475.345476                            | 0.019832892                                       | 7.047558713                        | 370.052879                               | 16.8779083                              |
| 702.6642012                            | 0.041950781                                       | 6.942403597                        | 339.887574                               | 56.71745562                             |
| 2027.271312                            | 0.01637135                                        | 7.724559548                        | 914.6317633                              | 42.05799922                             |
| 3615.941264                            | 0.013443491                                       | 7.770162916                        | 1411.593889                              | 45.31800653                             |
| 1745.173094                            | 0.018298819                                       | 7.530267261                        | 1666.02305                               | 82.56427305                             |
| 1068.049819                            | 0.027561174                                       | 7.21651671                         | 353.6965522                              | 30.42753623                             |
| 996.8097744                            | 0.023365934                                       | 7.318036434                        | 427.5714286                              | 31.07669173                             |
| 806.9405128                            | 0.0252881                                         | 7.229305915                        | 619.8728205                              | 49.31179487                             |
| 2722.520396                            | 0.013388991                                       | 7.931543926                        | 1525.924598                              | 54.15846724                             |
| 1619.692308                            | 0.016275618                                       | 7.87608292                         | 1127.422209                              | 56.28108733                             |
| 1141.1875                              | 0.024279209                                       | 7.157514334                        | 595.3580097                              | 40.01213592                             |
| 5692.98335                             | 0.011722233                                       | 8.371400325                        | 3063.432687                              | 107.0122686                             |
| 920.9592299                            | 0.022848854                                       | 7.283144846                        | 602.5911665                              | 40.35107588                             |
| 1100.231835                            | 0.024097126                                       | 7.408662991                        | 884.8928839                              | 64.33932584                             |
| 1728.927707                            | 0.024185677                                       | 7.57053456                         | 1634.17015                               | 140.0108827                             |
| 3444.020333                            | 0.015210378                                       | 7.913465605                        | 2666.78801                               | 115.9487079                             |
| 639.8936709                            | 0.035513539                                       | 6.776221968                        | 233.3088608                              | 28.0556962                              |
| 1280.148887                            | 0.031018883                                       | 7.492470479                        | 1002.959606                              | 119.7949249                             |
| 751.9102761                            | 0.027909641                                       | 7.200150403                        | 379.3527607                              | 36.39417178                             |
| 3269.23456                             | 0.015380275                                       | 7.876934152                        | 2273.39168                               | 96.12672                                |
| 3053.268226                            | 0.014076337                                       | 7.924757856                        | 2304.868533                              | 82.44510842                             |
| 1060.710835                            | 0.024461076                                       | 7.47256303                         | 841.0276052                              | 70.88819876                             |
| 1151.82756                             | 0.029501583                                       | 7.175655065                        | 388.0238645                              | 38.32255581                             |
| 843.6205128                            | 0.029742286                                       | 7.372392809                        | 1212.732401                              | 127.5944056                             |
| 1103.487056                            | 0.023047875                                       | 7.562321926                        | 657.3036419                              | 52.52610794                             |
| 2499.853032                            | 0.014518876                                       | 7.587840708                        | 952.0535635                              | 32.79814077                             |
| 5086.83871                             | 0.016629024                                       | 7.799289538                        | 1118.720217                              | 52.06547429                             |
| 2188.305514                            | 0.017431775                                       | 7.484799783                        | 501.4470939                              | 23.39344262                             |
| 1524.661102                            | 0.018532557                                       | 7.603815068                        | 844.8505843                              | 44.40400668                             |
| 358.4926931                            | 0.043200649                                       | 6.783183104                        | 255.5031315                              | 41.38622129                             |
| 1088.554774                            | 0.023829993                                       | 7.356586963                        | 558.9707088                              | 40.67779731                             |
| 3468.15605                             | 0.010877328                                       | 7.889895264                        | 986.4869602                              | 25.44206926                             |
| 2078.651081                            | 0.015516462                                       | 7.523994177                        | 868.3735546                              | 30.86224233                             |
| 1538.506948                            | 0.025261085                                       | 7.374162711                        | 565.3735409                              | 45.4446915                              |
| 1746.088406                            | 0.02856791                                        | 7.739414617                        | 790.1630468                              | 93.38849801                             |
| 1691.998048                            | 0.015672122                                       | 7.751163815                        | 1090.375203                              | 48.16042955                             |
| 1893.855679                            | 0.017498047                                       | 7.437400982                        | 951.7052071                              | 42.67773678                             |
| 231.1697128                            | 0.05775825                                        | 6.718279665                        | 311.5                                    | 88.48563969                             |
| 2341.774843                            | 0.013188824                                       | 7.851813167                        | 908.0490566                              | 31.45534591                             |
| 1113.725018                            | 0.025110114                                       | 7.349917764                        | 840.2443472                              | 68.8519329                              |
| 945.885929                             | 0.021575181                                       | 7.356937632                        | 476.3251366                              | 31.58606557                             |
| 923.4893827                            | 0.028664167                                       | 7.320783624                        | 578.917037                               | 58.04493827                             |
| 402.6088957                            | 0.064357193                                       | 6.789528735                        | 234.6871166                              | 83.92177914                             |
| 2931.332074                            | 0.012921216                                       | 7.697084546                        | 1012.303946                              | 30.77833753                             |
| 1910.04071                             | 0.018582955                                       | 7.547861082                        | 1959.418676                              | 96.31545437                             |
| 2295.68303                             | 0.014277686                                       | 7.837163395                        | 1182.171515                              | 47.11636364                             |
| 2379.619485                            | 0.01516523                                        | 7.71998102                         | 1672.338695                              | 65.99908088                             |
| 1382.246347                            | 0.021629734                                       | 7.630676821                        | 1041.551724                              | 74.01694915                             |
| 2491.673766                            | 0.013520402                                       | 7.926866298                        | 1022.856585                              | 38.08697196                             |
| 1309.025788                            | 0.02880442                                        | 7.18876496                         | 328.4460363                              | 30.23782235                             |
| 876.6534772                            | 0.022163564                                       | 7.1906917                          | 278.1678657                              | 18.48441247                             |
| 2557.919293                            | 0.016866994                                       | 7.962403375                        | 1746.23346                               | 97.39002425                             |

| wavelet.LLL_gldm_SmallDependenceEmphasis | wavelet.LLL_gldm_DependenceNonUniformityNormalized | wavelet.LLL_gldm_DependenceVariance | wavelet.LLL_gldm_LargeDependenceEmphasis |
|------------------------------------------|----------------------------------------------------|-------------------------------------|------------------------------------------|
| 0.668542571                              | 0.433154396                                        | 0.808230459                         | 3.384542884                              |
| 0.528441176                              | 0.298402585                                        | 1.410911379                         | 5.588235294                              |
| 0.499552217                              | 0.27568593                                         | 1.887437977                         | 6.707953064                              |
| 0.61066346                               | 0.36258825                                         | 1.455547186                         | 4.891504066                              |
| 0.547147118                              | 0.32178091                                         | 1.217054391                         | 4.961148649                              |
| 0.589448181                              | 0.362121212                                        | 1.094536272                         | 4.345454545                              |
| 0.563550777                              | 0.332565578                                        | 1.552451398                         | 5.317465935                              |
| 0.49854287                               | 0.273128383                                        | 2.115287856                         | 7.063038371                              |
| 0.571719057                              | 0.336804458                                        | 1.360140048                         | 4.999120106                              |
| 0.602877516                              | 0.357511069                                        | 1.27767877                          | 4.675373134                              |
| 0.570727969                              | 0.345323614                                        | 0.987105024                         | 4.351458886                              |
| 0.586965621                              | 0.354182598                                        | 1.111731264                         | 4.442950108                              |
| 0.36440979                               | 0.180576351                                        | 4.209104714                         | 13.47455811                              |
| 0.561169894                              | 0.334995653                                        | 1.199473286                         | 4.784507863                              |
| 0.589576024                              | 0.342526502                                        | 1.56384036                          | 5.267137097                              |
| 0.489467464                              | 0.278108174                                        | 1.823081859                         | 6.559872029                              |
| 0.602350177                              | 0.373322503                                        | 0.93184235                          | 4.001675042                              |
| 0.469331854                              | 0.261946906                                        | 2.042735296                         | 7.225466342                              |
| 0.517203032                              | 0.299373696                                        | 1.513434204                         | 5.725731895                              |
| 0.573120644                              | 0.33880896                                         | 1.233655798                         | 4.773033276                              |
| 0.42260609                               | 0.218921249                                        | 3.099288584                         | 9.993386243                              |
| 0.557359422                              | 0.337417253                                        | 1.049164219                         | 4.53660797                               |
| 0.523413341                              | 0.297657013                                        | 1.396419525                         | 5.578125                                 |
| 0.580755307                              | 0.353915425                                        | 0.939805261                         | 4.1885153                                |
| 0.512059423                              | 0.285381502                                        | 1.760066003                         | 6.30871956                               |
| 0.656967464                              | 0.416725215                                        | 0.911977401                         | 3.645842127                              |
| 0.61466508                               | 0.382239431                                        | 0.891814032                         | 3.861119703                              |
| 0.558559633                              | 0.3274249                                          | 1.420080423                         | 5.186097031                              |
| 0.576655996                              | 0.339198935                                        | 1.261875091                         | 4.852348993                              |
| 0.548888538                              | 0.325447579                                        | 1.146669903                         | 4.814995131                              |
| 0.503282981                              | 0.271524024                                        | 2.406852131                         | 7.551492224                              |
| 0.512554114                              | 0.290602769                                        | 1.883071725                         | 6.403576607                              |
| 0.624533172                              | 0.392404752                                        | 0.814170243                         | 3.663982657                              |
| 0.596711078                              | 0.368380987                                        | 1.003517248                         | 4.158297872                              |
| 0.586567067                              | 0.346704466                                        | 1.33135697                          | 4.854223433                              |
| 0.452065766                              | 0.239256478                                        | 2.530119354                         | 8.495831944                              |
| 0.459450703                              | 0.246795193                                        | 2.305688185                         | 7.96371943                               |
| 0.50457853                               | 0.273941532                                        | 2.854732675                         | 8.152489828                              |
| 0.585487805                              | 0.363988367                                        | 0.812006081                         | 3.907317073                              |
| 0.600197085                              | 0.367402356                                        | 1.079677369                         | 4.267400275                              |
| 0.546658039                              | 0.311141184                                        | 1.622574246                         | 5.703161141                              |
| 0.708729564                              | 0.480636785                                        | 0.522201445                         | 2.715541764                              |
| 0.592933154                              | 0.355184182                                        | 1.153931658                         | 4.490829455                              |
| 0.625952342                              | 0.390135351                                        | 0.87086504                          | 3.766881029                              |
| 0.583431654                              | 0.349963632                                        | 1.176895139                         | 4.569640063                              |
| 0.589334869                              | 0.351717878                                        | 1.300604842                         | 4.74571949                               |
| 0.562456915                              | 0.329515828                                        | 1.487571212                         | 5.271372205                              |
| 0.548996026                              | 0.33815072                                         | 1.057817861                         | 4.572904707                              |
| 0.668601319                              | 0.434844746                                        | 0.787259338                         | 3.352526439                              |
| 0.458399618                              | 0.251396135                                        | 2.083986905                         | 7.519230769                              |
| 0.585170064                              | 0.356026377                                        | 1.066150729                         | 4.352277151                              |
| 0.654531621                              | 0.418746333                                        | 0.758171611                         | 3.399881341                              |
| 0.604628591                              | 0.369242697                                        | 1.027552806                         | 4.175975177                              |
| 0.562437318                              | 0.320376497                                        | 1.506918189                         | 5.434782609                              |
| 0.545859565                              | 0.321482277                                        | 1.278107298                         | 5.058646617                              |
| 0.529232105                              | 0.317883498                                        | 1.142686128                         | 4.928205128                              |
| 0.615617013                              | 0.377237231                                        | 1.020328841                         | 4.098640297                              |
| 0.550152088                              | 0.326033028                                        | 1.219557436                         | 4.915558126                              |
| 0.591646103                              | 0.361260928                                        | 0.919661372                         | 4.084951456                              |
| 0.582340658                              | 0.335571551                                        | 2.833500729                         | 7.109321941                              |
| 0.578373797                              | 0.351410627                                        | 0.967347237                         | 4.254813137                              |
| 0.566323473                              | 0.331420556                                        | 1.630514666                         | 5.435205993                              |
| 0.502459739                              | 0.28228885                                         | 1.623062258                         | 6.169113837                              |
| 0.569626258                              | 0.34983445                                         | 0.914419343                         | 4.201626656                              |
| 0.521864089                              | 0.295327672                                        | 1.439647492                         | 5.675949367                              |
| 0.48284854                               | 0.259699536                                        | 2.511072981                         | 7.946659762                              |
| 0.498091267                              | 0.290914694                                        | 1.453263201                         | 5.791411043                              |
| 0.589108039                              | 0.363742669                                        | 0.935675802                         | 4.0944                                   |
| 0.634245863                              | 0.393523738                                        | 0.929929176                         | 3.836264299                              |
| 0.502244531                              | 0.290209664                                        | 1.524229127                         | 5.902691511                              |
| 0.52446629                               | 0.298709672                                        | 1.506801288                         | 5.722093918                              |
| 0.507159266                              | 0.282688205                                        | 1.924902386                         | 6.616317016                              |
| 0.519694528                              | 0.28841757                                         | 1.860544826                         | 6.413777973                              |
| 0.652492991                              | 0.421449121                                        | 0.684308166                         | 3.273572377                              |
| 0.588103416                              | 0.357304445                                        | 1.03140283                          | 4.293516448                              |
| 0.59681694                               | 0.373656553                                        | 0.844827548                         | 3.874813711                              |
| 0.59334046                               | 0.352608758                                        | 1.102889903                         | 4.450751252                              |
| 0.488117782                              | 0.26670473                                         | 2.240445256                         | 7.409185804                              |
| 0.562385221                              | 0.327457943                                        | 1.337582009                         | 5.072642062                              |
| 0.65592519                               | 0.421755862                                        | 0.774752185                         | 3.404446345                              |
| 0.674229709                              | 0.436588011                                        | 0.818922374                         | 3.383107089                              |
| 0.552640445                              | 0.314271007                                        | 1.901077153                         | 6.065036131                              |
| 0.472791232                              | 0.241713994                                        | 3.223994211                         | 9.483940043                              |
| 0.575462979                              | 0.354824342                                        | 0.960052329                         | 4.218353401                              |
| 0.609672225                              | 0.390203037                                        | 0.737826165                         | 3.587125871                              |
| 0.369140697                              | 0.203328982                                        | 2.662058846                         | 10.12793734                              |
| 0.622099216                              | 0.380793357                                        | 1.160231883                         | 4.268763103                              |
| 0.54352081                               | 0.306434846                                        | 1.652477255                         | 5.823485606                              |
| 0.556540207                              | 0.3253587                                          | 1.420802353                         | 5.215846995                              |
| 0.511888282                              | 0.285884957                                        | 1.770238439                         | 6.32345679                               |
| 0.359895055                              | 0.179974783                                        | 3.961719956                         | 13.19325153                              |
| 0.653582774                              | 0.424980666                                        | 0.658567862                         | 3.211586902                              |
| 0.608406754                              | 0.378047207                                        | 0.840288318                         | 3.816129655                              |
| 0.585111322                              | 0.358233792                                        | 1.085833242                         | 4.363030303                              |
| 0.614021948                              | 0.384269002                                        | 0.835754183                         | 3.761488971                              |
| 0.543006517                              | 0.304369294                                        | 1.747622989                         | 6.004091175                              |
| 0.596873035                              | 0.363101379                                        | 1.154537546                         | 4.420660277                              |
| 0.543386959                              | 0.31370204                                         | 1.408632843                         | 5.359121299                              |
| 0.541224687                              | 0.333534611                                        | 1.03819103                          | 4.60911271                               |
| 0.525396959                              | 0.302430457                                        | 1.550164498                         | 5.729476966                              |

| wavelet.LLL_gldm_LargeDependenceLowGrayLevelEmphasis | wavelet.LLL_gldm_SmallDependenceHighGrayLevelEmphasis | wavelet.LLL_gldm_LargeDependenceHighGrayLevelEmphasis |
|------------------------------------------------------|-------------------------------------------------------|-------------------------------------------------------|
| 0.010547715                                          | 1597.430542                                           | 4479.241282                                           |
| 0.046413668                                          | 534.8342837                                           | 1802.46631                                            |
| 0.063633223                                          | 1287.203302                                           | 7148.829205                                           |
| 0.055314613                                          | 1323.016345                                           | 6148.035824                                           |
| 0.031044612                                          | 661.9843746                                           | 2567.193834                                           |
| 0.018044512                                          | 712.8147531                                           | 2316.325758                                           |
| 0.010866166                                          | 1785.455482                                           | 9404.535303                                           |
| 0.025880151                                          | 718.0257293                                           | 3460.206147                                           |
| 0.006313274                                          | 1488.440151                                           | 12521.92521                                           |
| 0.02863845                                           | 1007.458965                                           | 2603.751866                                           |
| 0.013858889                                          | 757.4946419                                           | 3783.074271                                           |
| 0.011600592                                          | 886.4938653                                           | 3425.783514                                           |
| 0.115951136                                          | 313.1178246                                           | 2459.152116                                           |
| 0.026103658                                          | 1033.505375                                           | 3209.411765                                           |
| 0.012543219                                          | 1286.762635                                           | 5144.091734                                           |
| 0.004545706                                          | 1540.928445                                           | 16022.11289                                           |
| 0.006463376                                          | 1191.112718                                           | 5658.545226                                           |
| 0.058393767                                          | 427.7980322                                           | 2130.656123                                           |
| 0.03248625                                           | 534.1173954                                           | 2650.254237                                           |
| 0.006065906                                          | 1320.741813                                           | 6345.234276                                           |
| 0.179955435                                          | 394.9648174                                           | 2025.577381                                           |
| 0.020353734                                          | 678.0761675                                           | 2555.957368                                           |
| 0.039144089                                          | 648.6134161                                           | 2367.521484                                           |
| 0.014851499                                          | 1489.883972                                           | 8026.853041                                           |
| 0.017227203                                          | 775.2274022                                           | 3678.120974                                           |
| 0.007916594                                          | 1488.723812                                           | 6366.314057                                           |
| 0.005828362                                          | 2058.180133                                           | 8926.854315                                           |
| 0.008240309                                          | 1154.341739                                           | 5435.971398                                           |
| 0.013288512                                          | 829.8066816                                           | 4780.850112                                           |
| 0.05354042                                           | 528.7089403                                           | 2105.542843                                           |
| 0.041440849                                          | 775.1015626                                           | 3115.91509                                            |
| 0.077678822                                          | 558.6538821                                           | 3387.268246                                           |
| 0.001897533                                          | 2484.804797                                           | 13822.08919                                           |
| 0.021070081                                          | 1695.304124                                           | 8694.418723                                           |
| 0.023006261                                          | 966.5579579                                           | 3841.414623                                           |
| 0.065884853                                          | 518.41676                                             | 2433.172391                                           |
| 0.040412973                                          | 882.9799875                                           | 3517.722386                                           |
| 0.006092825                                          | 2209.119326                                           | 64673.00213                                           |
| 0.007085884                                          | 1253.026907                                           | 6568.53252                                            |
| 0.004245752                                          | 1833.445579                                           | 11724.99051                                           |
| 0.029507847                                          | 1016.138813                                           | 3326.214726                                           |
| 0.005362865                                          | 4395.271807                                           | 16421.39876                                           |
| 0.014110547                                          | 1275.097346                                           | 4728.333698                                           |
| 0.00814612                                           | 1631.933536                                           | 6841.96463                                            |
| 0.019213772                                          | 932.8760642                                           | 5412.00939                                            |
| 0.003708879                                          | 1741.843639                                           | 10367.50601                                           |
| 0.016520784                                          | 1068.678325                                           | 4436.003069                                           |
| 0.033965709                                          | 505.8698217                                           | 2088.346728                                           |
| 0.00749979                                           | 1077.905504                                           | 4011.26322                                            |
| 0.027569512                                          | 469.1742526                                           | 3090.073964                                           |
| 0.0117426                                            | 1363.682642                                           | 6516.661736                                           |
| 0.002459999                                          | 2566.277155                                           | 10441.92287                                           |
| 0.007117173                                          | 1233.005536                                           | 5262.232934                                           |
| 0.046375216                                          | 902.5627303                                           | 2306.84692                                            |
| 0.024635111                                          | 724.8432424                                           | 3076.296992                                           |
| 0.027251854                                          | 526.7252317                                           | 2810.922051                                           |
| 0.011643882                                          | 1829.640265                                           | 9806.408158                                           |
| 0.029879197                                          | 1045.689192                                           | 5593.250434                                           |
| 0.011034627                                          | 830.7178567                                           | 3112.723908                                           |
| 0.002813946                                          | 2890.951149                                           | 66075.56611                                           |
| 0.02639588                                           | 653.0122674                                           | 2716.240091                                           |
| 0.02609048                                           | 813.3985898                                           | 3121.750187                                           |
| 0.008058523                                          | 1024.648188                                           | 8297.907583                                           |
| 0.002722344                                          | 2099.841287                                           | 12993.10731                                           |
| 0.038334363                                          | 486.0155151                                           | 1892.918987                                           |
| 0.015473254                                          | 834.1947145                                           | 6002.858364                                           |
| 0.040326082                                          | 486.300086                                            | 2666.910276                                           |
| 0.002944754                                          | 2038.607246                                           | 12124.4288                                            |
| 0.006969999                                          | 2400.967178                                           | 7094.000683                                           |
| 0.01964503                                           | 696.5275957                                           | 4067.628709                                           |
| 0.022012479                                          | 846.7371583                                           | 3410.010778                                           |
| 0.053707271                                          | 625.7127578                                           | 2414.033566                                           |
| 0.044772085                                          | 813.135132                                            | 3242.686705                                           |
| 0.006675773                                          | 1825.71464                                            | 6320.680832                                           |
| 0.001667851                                          | 3033.314199                                           | 21148.62217                                           |
| 0.007526223                                          | 1384.422022                                           | 7542.587183                                           |
| 0.018859063                                          | 1143.758872                                           | 4080.580968                                           |
| 0.09950764                                           | 259.4349958                                           | 1227.645094                                           |
| 0.04811545                                           | 817.5296941                                           | 2956.288811                                           |
| 0.013591785                                          | 2446.710059                                           | 9533.428388                                           |
| 0.01112269                                           | 1662.569965                                           | 4296.11815                                            |
| 0.013129222                                          | 1051.488906                                           | 5700.299055                                           |
| 0.048150431                                          | 1096.927289                                           | 16727.80514                                           |
| 0.018209062                                          | 1069.367959                                           | 5584.134722                                           |
| 0.004895968                                          | 1195.076268                                           | 6791.643296                                           |
| 0.178277952                                          | 146.2132059                                           | 1159.300261                                           |
| 0.019741752                                          | 1716.709116                                           | 5988.866667                                           |
| 0.021709048                                          | 849.2962835                                           | 3181.091174                                           |
| 0.052335329                                          | 661.2573538                                           | 2756.866803                                           |
| 0.032683381                                          | 672.8620087                                           | 2866.561975                                           |
| 0.140547983                                          | 294.9671945                                           | 1954.840491                                           |
| 0.005139718                                          | 2003.971037                                           | 8251.88539                                            |
| 0.006185862                                          | 1320.817571                                           | 5833.623577                                           |
| 0.0082968                                            | 1557.130417                                           | 7329.592121                                           |
| 0.005226088                                          | 1597.240388                                           | 7305.694393                                           |
| 0.022901904                                          | 1024.323365                                           | 4148.271479                                           |
| 0.01533449                                           | 1589.883726                                           | 11133.776                                             |
| 0.06885665                                           | 1001.258229                                           | 3038.481375                                           |
| 0.05296095                                           | 557.3936094                                           | 2869.476019                                           |
| 0.011776164                                          | 1525.084519                                           | 11752.19293                                           |

| wavelet.LLL_gldm_SmallDependenceLowGrayLevelEmphasis | wavelet.LLL_gldm_LowGrayLevelEmphasis | wavelet.LLL_gldm_DistanceZoneVariabilityNormalized | wavelet.LLL_gldm_LowIntensityEmphasis |
|------------------------------------------------------|---------------------------------------|----------------------------------------------------|---------------------------------------|
| 0.001684532                                          | 0.002631657                           | 0.994939944                                        | 0.002517773                           |
| 0.002979167                                          | 0.007700827                           | 1                                                  | 0.006659699                           |
| 0.002347368                                          | 0.005950013                           | 1                                                  | 0.004717854                           |
| 0.003188597                                          | 0.008106068                           | 1                                                  | 0.006226156                           |
| 0.002644233                                          | 0.005229592                           | 1                                                  | 0.004848809                           |
| 0.003239215                                          | 0.004680203                           | 1                                                  | 0.005216381                           |
| 0.000988561                                          | 0.001798031                           | 0.993379383                                        | 0.001711306                           |
| 0.001831944                                          | 0.003563596                           | 0.996564765                                        | 0.003630883                           |
| 0.000758426                                          | 0.001287672                           | 0.999321113                                        | 0.001311304                           |
| 0.003019199                                          | 0.005425562                           | 1                                                  | 0.005061341                           |
| 0.002513713                                          | 0.003756784                           | 1                                                  | 0.004203333                           |
| 0.001538997                                          | 0.002546866                           | 0.992218018                                        | 0.002587295                           |
| 0.00319044                                           | 0.008751348                           | 1                                                  | 0.008699701                           |
| 0.001928989                                          | 0.004654229                           | 1                                                  | 0.00396231                            |
| 0.000864335                                          | 0.002246052                           | 1                                                  | 0.001833952                           |
| 0.00056559                                           | 0.000930233                           | 1                                                  | 0.001105281                           |
| 0.001579367                                          | 0.002077108                           | 1                                                  | 0.002441762                           |
| 0.00307402                                           | 0.007162417                           | 1                                                  | 0.00683835                            |
| 0.003511926                                          | 0.005987706                           | 1                                                  | 0.006496498                           |
| 0.000700045                                          | 0.001217983                           | 0.998813761                                        | 0.001206021                           |
| 0.002896064                                          | 0.012440586                           | 0.998631075                                        | 0.007747256                           |
| 0.002465637                                          | 0.004519529                           | 0.994285761                                        | 0.004502539                           |
| 0.004097941                                          | 0.007269521                           | 1                                                  | 0.007604509                           |
| 0.001382673                                          | 0.00256913                            | 0.998864927                                        | 0.002382493                           |
| 0.001667724                                          | 0.002885405                           | 1                                                  | 0.003150251                           |
| 0.001446586                                          | 0.002095229                           | 1                                                  | 0.002159135                           |
| 0.000777843                                          | 0.001246263                           | 1                                                  | 0.001216135                           |
| 0.000943287                                          | 0.001575187                           | 0.998862991                                        | 0.001638393                           |
| 0.00390772                                           | 0.005107845                           | 1                                                  | 0.006393993                           |
| 0.002898689                                          | 0.007008365                           | 1                                                  | 0.005655066                           |
| 0.001759645                                          | 0.004167373                           | 1                                                  | 0.003498158                           |
| 0.003207882                                          | 0.008975969                           | 1                                                  | 0.007222843                           |
| 0.000648438                                          | 0.000812852                           | 0.997378773                                        | 0.000969024                           |
| 0.001595956                                          | 0.003140646                           | 1                                                  | 0.00266848                            |
| 0.00155044                                           | 0.003532957                           | 0.991120395                                        | 0.002897571                           |
| 0.002914116                                          | 0.007147445                           | 0.998698764                                        | 0.006559709                           |
| 0.001584545                                          | 0.004183193                           | 0.998972251                                        | 0.003543621                           |
| 0.000688891                                          | 0.001195392                           | 0.993971924                                        | 0.001343861                           |
| 0.001763751                                          | 0.002435595                           | 1                                                  | 0.002835532                           |
| 0.000620325                                          | 0.000962402                           | 0.998389371                                        | 0.001004135                           |
| 0.001931122                                          | 0.004046686                           | 1                                                  | 0.003573543                           |
| 0.000495213                                          | 0.001208192                           | 0.997366693                                        | 0.000793347                           |
| 0.001386747                                          | 0.002626494                           | 0.999185999                                        | 0.002398335                           |
| 0.001206838                                          | 0.001990035                           | 0.99886557                                         | 0.00191829                            |
| 0.001596448                                          | 0.004037752                           | 1                                                  | 0.003385483                           |
| 0.000740672                                          | 0.001016146                           | 1                                                  | 0.00118574                            |
| 0.001222085                                          | 0.002425829                           | 0.999312242                                        | 0.002172652                           |
| 0.004229119                                          | 0.007217131                           | 1                                                  | 0.007513795                           |
| 0.002257566                                          | 0.002912632                           | 1                                                  | 0.003222652                           |
| 0.002082828                                          | 0.004069624                           | 0.988764404                                        | 0.004492012                           |
| 0.002025039                                          | 0.003046826                           | 1                                                  | 0.003348069                           |
| 0.000658047                                          | 0.000878462                           | 1                                                  | 0.000966369                           |
| 0.000944018                                          | 0.00154162                            | 0.997410169                                        | 0.001542828                           |
| 0.004901466                                          | 0.009019173                           | 1                                                  | 0.008944302                           |
| 0.003196901                                          | 0.005493592                           | 1                                                  | 0.005811203                           |
| 0.002952281                                          | 0.005457547                           | 1                                                  | 0.005492045                           |
| 0.001323409                                          | 0.002372159                           | 0.995752232                                        | 0.002178315                           |
| 0.002020451                                          | 0.004432365                           | 1                                                  | 0.003913637                           |
| 0.001769449                                          | 0.00278378                            | 1                                                  | 0.00290981                            |
| 0.000484346                                          | 0.000721011                           | 0.994973222                                        | 0.000814963                           |
| 0.004083249                                          | 0.006574547                           | 0.996563584                                        | 0.006907772                           |
| 0.002173978                                          | 0.004133101                           | 1                                                  | 0.003935545                           |
| 0.000536192                                          | 0.001307808                           | 0.991020835                                        | 0.00120341                            |
| 0.000539268                                          | 0.000804464                           | 0.982242941                                        | 0.000905556                           |
| 0.003584371                                          | 0.006584964                           | 1                                                  | 0.006717775                           |
| 0.00089377                                           | 0.001830865                           | 0.994363596                                        | 0.001822516                           |
| 0.002581342                                          | 0.006544395                           | 1                                                  | 0.005915981                           |
| 0.000544494                                          | 0.000829421                           | 0.992917936                                        | 0.000893934                           |
| 0.000838691                                          | 0.001462308                           | 1                                                  | 0.001342317                           |
| 0.001524061                                          | 0.003069512                           | 1                                                  | 0.003017134                           |
| 0.002226193                                          | 0.003948712                           | 1                                                  | 0.004122716                           |
| 0.002787763                                          | 0.00640623                            | 0.992730307                                        | 0.005590111                           |
| 0.002145037                                          | 0.004999515                           | 1                                                  | 0.004134443                           |
| 0.001570861                                          | 0.00212909                            | 0.997593265                                        | 0.002295712                           |
| 0.00054235                                           | 0.000674699                           | 0.992362881                                        | 0.000856258                           |
| 0.001848189                                          | 0.002678276                           | 1                                                  | 0.003024105                           |
| 0.002226884                                          | 0.003773413                           | 1                                                  | 0.00373107                            |
| 0.006011962                                          | 0.012924082                           | 1                                                  | 0.012652655                           |
| 0.003156354                                          | 0.007644557                           | 1                                                  | 0.006056241                           |
| 0.001541692                                          | 0.002775514                           | 1                                                  | 0.00239952                            |
| 0.00175484                                           | 0.002768963                           | 1                                                  | 0.00263965                            |
| 0.001275866                                          | 0.002090859                           | 1                                                  | 0.002211266                           |
| 0.002127293                                          | 0.004667003                           | 0.998843931                                        | 0.004411271                           |
| 0.001885827                                          | 0.003540728                           | 1                                                  | 0.003238183                           |
| 0.001381779                                          | 0.001856957                           | 0.99649329                                         | 0.002132188                           |
| 0.006288313                                          | 0.017723291                           | 1                                                  | 0.017373075                           |
| 0.001741315                                          | 0.003057178                           | 1                                                  | 0.002756458                           |
| 0.001528979                                          | 0.003075787                           | 1                                                  | 0.002824346                           |
| 0.003308734                                          | 0.00690865                            | 1                                                  | 0.00599749                            |
| 0.001986529                                          | 0.004268195                           | 1                                                  | 0.003944012                           |
| 0.003024347                                          | 0.00993418                            | 1                                                  | 0.00895387                            |
| 0.001208816                                          | 0.001718                              | 0.99545715                                         | 0.001800404                           |
| 0.000910587                                          | 0.001554697                           | 0.988895404                                        | 0.001525177                           |
| 0.001075276                                          | 0.00176322                            | 1                                                  | 0.001786939                           |
| 0.00080235                                           | 0.001308403                           | 0.996722395                                        | 0.001299721                           |
| 0.001391739                                          | 0.003008933                           | 0.99618504                                         | 0.002603951                           |
| 0.001838843                                          | 0.003510053                           | 1                                                  | 0.003311422                           |
| 0.004104387                                          | 0.00974877                            | 1                                                  | 0.007773984                           |
| 0.004163432                                          | 0.008345646                           | 1                                                  | 0.007500238                           |
| 0.00074589                                           | 0.001733126                           | 0.99657633                                         | 0.001496039                           |

| wavelet.LLL_gldzm_LargeDistanceEmphasis | wavelet.LLL_gldzm_HighIntensitySmallDistanceEmphasis | wavelet.LLL_gldzm_LowIntensityLargeDistanceEmphasis | wavelet.LLL_gldzm_HighIntensityEmphasis |
|-----------------------------------------|------------------------------------------------------|-----------------------------------------------------|-----------------------------------------|
| 1.007609385                             | 2313.259036                                          | 0.002520822                                         | 2318.147115                             |
| 1                                       | 942.6899642                                          | 0.006659699                                         | 942.6899642                             |
| 1                                       | 2504.4563                                            | 0.004717854                                         | 2504.4563                               |
| 1                                       | 2125.057402                                          | 0.006226156                                         | 2125.057402                             |
| 1                                       | 1148.370794                                          | 0.004848809                                         | 1148.370794                             |
| 1                                       | 1137.191874                                          | 0.005216381                                         | 1137.191874                             |
| 1.009964019                             | 3112.830058                                          | 0.001716292                                         | 3118.887351                             |
| 1.005161734                             | 1361.088524                                          | 0.003639125                                         | 1362.008603                             |
| 1.001018676                             | 2536.508744                                          | 0.001311765                                         | 2537.071307                             |
| 1                                       | 1565.868603                                          | 0.005061341                                         | 1565.868603                             |
| 1                                       | 1286.773737                                          | 0.004203333                                         | 1286.773737                             |
| 1.01171875                              | 1431.69515                                           | 0.002596259                                         | 1436.532552                             |
| 1                                       | 809.8447607                                          | 0.008699701                                         | 809.8447607                             |
| 1                                       | 1729.537205                                          | 0.00396231                                          | 1729.537205                             |
| 1                                       | 2096.935583                                          | 0.001833952                                         | 2096.935583                             |
| 1                                       | 3078.007255                                          | 0.001105281                                         | 3078.007255                             |
| 1                                       | 1953.206561                                          | 0.002441762                                         | 1953.206561                             |
| 1                                       | 852.8729447                                          | 0.006683835                                         | 852.8729447                             |
| 1                                       | 984.3484456                                          | 0.006496498                                         | 984.3484456                             |
| 1.001780415                             | 2237.966543                                          | 0.001206623                                         | 2239.35638                              |
| 1.002054795                             | 890.9494863                                          | 0.007752948                                         | 891.1349315                             |
| 1.008595989                             | 1128.701289                                          | 0.004531387                                         | 1129.416905                             |
| 1                                       | 1179.616013                                          | 0.007604509                                         | 1179.616013                             |
| 1.001703578                             | 2507.9205                                            | 0.002383673                                         | 2508.535491                             |
| 1                                       | 1432.841746                                          | 0.003150251                                         | 1432.841746                             |
| 1                                       | 2233.133025                                          | 0.002159135                                         | 2233.133025                             |
| 1                                       | 3283.079733                                          | 0.001216135                                         | 3283.079733                             |
| 1.001706485                             | 1988.744027                                          | 0.001641919                                         | 1988.950512                             |
| 1                                       | 1376.583051                                          | 0.006393993                                         | 1376.583051                             |
| 1                                       | 900.4085366                                          | 0.005655066                                         | 900.4085366                             |
| 1                                       | 1469.282309                                          | 0.003498158                                         | 1469.282309                             |
| 1                                       | 1068.584085                                          | 0.007222843                                         | 1068.584085                             |
| 1.003937008                             | 3955.378171                                          | 0.000969625                                         | 3961.911636                             |
| 1                                       | 2810.357724                                          | 0.00266848                                          | 2810.357724                             |
| 1.013379074                             | 1580.097341                                          | 0.002918061                                         | 1584.469983                             |
| 1.001953125                             | 1090.440918                                          | 0.006566467                                         | 1090.582031                             |
| 1.001542416                             | 1816.969794                                          | 0.003548958                                         | 1817.081234                             |
| 1.009069533                             | 4348.104887                                          | 0.001353723                                         | 4360.546523                             |
| 1                                       | 2093.340964                                          | 0.002835532                                         | 2093.340964                             |
| 1.002417892                             | 3032.047099                                          | 0.00100568                                          | 3033.79327                              |
| 1                                       | 1772.373509                                          | 0.003573543                                         | 1772.373509                             |
| 1.003955175                             | 6205.375165                                          | 0.000794517                                         | 6209.031971                             |
| 1.001221498                             | 2055.752036                                          | 0.002399181                                         | 2056.192997                             |
| 1.001702611                             | 2536.086833                                          | 0.001918619                                         | 2538.293417                             |
| 1                                       | 1572.930342                                          | 0.003385483                                         | 1572.930342                             |
| 1                                       | 2884.904267                                          | 0.00118574                                          | 2884.904267                             |
| 1.001031992                             | 1825.989336                                          | 0.002173186                                         | 1826.48882                              |
| 1                                       | 866.3567568                                          | 0.007513795                                         | 866.3567568                             |
| 1                                       | 1581.836735                                          | 0.003222652                                         | 1581.836735                             |
| 1.016949153                             | 961.0858051                                          | 0.004546642                                         | 962.6398305                             |
| 1                                       | 2267.776937                                          | 0.003348069                                         | 2267.776937                             |
| 1                                       | 3843.911372                                          | 0.000966369                                         | 3843.911372                             |
| 1.003889789                             | 1969.393112                                          | 0.001544594                                         | 1971.635332                             |
| 1                                       | 1487.71736                                           | 0.008944302                                         | 1487.71736                              |
| 1                                       | 1250.855247                                          | 0.005811203                                         | 1250.855247                             |
| 1                                       | 954.0299003                                          | 0.005492045                                         | 954.0299003                             |
| 1.006385243                             | 2903.151383                                          | 0.002182373                                         | 2906.383115                             |
| 1                                       | 1852.881976                                          | 0.003913637                                         | 1852.881976                             |
| 1                                       | 1339.386894                                          | 0.00290981                                          | 1339.386894                             |
| 1.007559214                             | 4929.072736                                          | 0.00081802                                          | 4937.649924                             |
| 1.005163511                             | 1083.308305                                          | 0.006959586                                         | 1083.494836                             |
| 1                                       | 1377.42983                                           | 0.003935545                                         | 1377.42983                              |
| 1.013529765                             | 1984.38853                                           | 0.001215065                                         | 1991.801263                             |
| 1.026876369                             | 3608.5001                                            | 0.000915027                                         | 3632.338841                             |
| 1                                       | 872.1991435                                          | 0.006717775                                         | 872.1991435                             |
| 1.008478568                             | 1653.61081                                           | 0.001829318                                         | 1658.472916                             |
| 1                                       | 940.5794393                                          | 0.005915981                                         | 940.5794393                             |
| 1.010660981                             | 3413.454809                                          | 0.000901082                                         | 3421.60886                              |
| 1                                       | 3623.222571                                          | 0.001342317                                         | 3623.222571                             |
| 1                                       | 1320.480689                                          | 0.003017134                                         | 1320.480689                             |
| 1                                       | 1533.722008                                          | 0.004122716                                         | 1533.722008                             |
| 1.010944467                             | 1174.044386                                          | 0.005621965                                         | 1175.414268                             |
| 1                                       | 1490.235645                                          | 0.004134443                                         | 1490.235645                             |
| 1.003614458                             | 2723.009337                                          | 0.002296668                                         | 2726.653614                             |
| 1.01149976                              | 5122.370747                                          | 0.000858861                                         | 5135.922856                             |
| 1                                       | 2291.523861                                          | 0.003024105                                         | 2291.523861                             |
| 1                                       | 1845.03252                                           | 0.00373107                                          | 1845.03252                              |
| 1                                       | 497.4011091                                          | 0.012652655                                         | 497.4011091                             |
| 1                                       | 1368.721163                                          | 0.006056241                                         | 1368.721163                             |
| 1                                       | 3681.682558                                          | 0.00239952                                          | 3681.682558                             |
| 1                                       | 2384.510782                                          | 0.00263965                                          | 2384.510782                             |
| 1                                       | 1853.566222                                          | 0.002211266                                         | 1853.566222                             |
| 1.001735107                             | 2247.979757                                          | 0.004416626                                         | 2248.120301                             |
| 1                                       | 1831.02402                                           | 0.003238183                                         | 1831.02402                              |
| 1.005269321                             | 1940.37339                                           | 0.002207862                                         | 1941.115925                             |
| 1                                       | 372.5364742                                          | 0.017373075                                         | 372.5364742                             |
| 1                                       | 2707.720508                                          | 0.002756458                                         | 2707.720508                             |
| 1                                       | 1481.639354                                          | 0.002824346                                         | 1481.639354                             |
| 1                                       | 1154.221018                                          | 0.00599749                                          | 1154.221018                             |
| 1                                       | 1234.274099                                          | 0.003944012                                         | 1234.274099                             |
| 1                                       | 759.9116541                                          | 0.00895387                                          | 759.9116541                             |
| 1.006829824                             | 3030.580108                                          | 0.001802427                                         | 3036.648833                             |
| 1.016750419                             | 2106.836823                                          | 0.0015529                                           | 2111.726689                             |
| 1                                       | 2582.790446                                          | 0.001786939                                         | 2582.790446                             |
| 1.004924491                             | 2549.654301                                          | 0.001304559                                         | 2552.184504                             |
| 1.005733397                             | 1803.218944                                          | 0.002616009                                         | 1804.225514                             |
| 1                                       | 2628.584164                                          | 0.003311422                                         | 2628.584164                             |
| 1                                       | 1754.72093                                           | 0.007773984                                         | 1754.72093                              |
| 1                                       | 1006.565465                                          | 0.007500238                                         | 1006.565465                             |
| 1.005144327                             | 2840.326379                                          | 0.00150256                                          | 2841.918548                             |

| wavelet.LLL_gldzm_DistanceZoneVariability | wavelet.LLL_gldzm_ZonePercentage | wavelet.LLL_gldzm_IntensityVariabilityNormalized | wavelet.LLL_gldzm_LowintensitySmallDistanceEmphasis | wavelet.LLL_gldzm_IntensityVariability |
|-------------------------------------------|----------------------------------|--------------------------------------------------|-----------------------------------------------------|----------------------------------------|
| 1569.020292                               | 0.743166824                      | 0.01370968                                       | 0.002517011                                         | 21.62016487                            |
| 558                                       | 0.596791444                      | 0.024530774                                      | 0.006659699                                         | 13.68817204                            |
| 881                                       | 0.574315515                      | 0.01288779                                       | 0.004717854                                         | 11.35414302                            |
| 662                                       | 0.677584442                      | 0.015343051                                      | 0.006226156                                         | 10.1570997                             |
| 1486                                      | 0.627533784                      | 0.020040793                                      | 0.004848809                                         | 29.78061911                            |
| 443                                       | 0.671212121                      | 0.023169545                                      | 0.005216381                                         | 10.26410835                            |
| 3589.079712                               | 0.639355866                      | 0.012487198                                      | 0.001710059                                         | 45.11624689                            |
| 2896.017206                               | 0.568911511                      | 0.020851796                                      | 0.003628823                                         | 60.59532003                            |
| 2943.000679                               | 0.647822261                      | 0.016244044                                      | 0.001311189                                         | 47.83870968                            |
| 723                                       | 0.674440299                      | 0.018122201                                      | 0.005061341                                         | 13.10235131                            |
| 990                                       | 0.656498674                      | 0.019398021                                      | 0.004203333                                         | 19.2040404                             |
| 1524.046875                               | 0.66637744                       | 0.020169576                                      | 0.002585054                                         | 30.98046875                            |
| 773                                       | 0.414033208                      | 0.027551801                                      | 0.008699701                                         | 21.29754204                            |
| 1102                                      | 0.641817123                      | 0.01857372                                       | 0.00396231                                          | 20.46823956                            |
| 1304                                      | 0.657258065                      | 0.018514293                                      | 0.001833952                                         | 24.14263804                            |
| 2481                                      | 0.566956124                      | 0.016469058                                      | 0.001105281                                         | 40.85973398                            |
| 823                                       | 0.689279732                      | 0.018657108                                      | 0.002441762                                         | 15.35479951                            |
| 669                                       | 0.542579075                      | 0.026362887                                      | 0.006683835                                         | 17.6367713                             |
| 772                                       | 0.594761171                      | 0.022473758                                      | 0.006496498                                         | 17.34974093                            |
| 3366.002374                               | 0.648201577                      | 0.01758015                                       | 0.00120587                                          | 59.24510386                            |
| 1458.00137                                | 0.482804233                      | 0.024662226                                      | 0.007745833                                         | 36.00684932                            |
| 694.0114613                               | 0.646895273                      | 0.021556552                                      | 0.004495327                                         | 15.04584527                            |
| 612                                       | 0.59765625                       | 0.021599598                                      | 0.007604509                                         | 13.21895425                            |
| 1759.001138                               | 0.665281451                      | 0.013666348                                      | 0.002382198                                         | 24.06643952                            |
| 733                                       | 0.575805185                      | 0.023896334                                      | 0.003150251                                         | 17.47203274                            |
| 1729                                      | 0.729843816                      | 0.014693382                                      | 0.002159135                                         | 25.4048583                             |
| 2245                                      | 0.694401485                      | 0.013696162                                      | 0.001216135                                         | 30.74788419                            |
| 1756.001138                               | 0.636495293                      | 0.019663078                                      | 0.001637512                                         | 34.56769056                            |
| 295                                       | 0.659955257                      | 0.023659868                                      | 0.006393993                                         | 6.979661017                            |
| 1312                                      | 0.638753651                      | 0.02200606                                       | 0.005655066                                         | 28.87195122                            |
| 2685                                      | 0.564312736                      | 0.018501434                                      | 0.003498158                                         | 49.67635009                            |
| 1219                                      | 0.589173514                      | 0.019675483                                      | 0.007222843                                         | 23.98441345                            |
| 2280.007874                               | 0.70795912                       | 0.01497303                                       | 0.000968874                                         | 34.22834646                            |
| 1599                                      | 0.680425532                      | 0.013274009                                      | 0.00266848                                          | 21.22514071                            |
| 2889.115952                               | 0.661898274                      | 0.016952711                                      | 0.002892448                                         | 49.41715266                            |
| 1534.001302                               | 0.512170724                      | 0.023327298                                      | 0.006558019                                         | 35.83072917                            |
| 1943.001028                               | 0.522708949                      | 0.021109297                                      | 0.003542287                                         | 41.05758355                            |
| 2959.054417                               | 0.576826196                      | 0.010415876                                      | 0.001341396                                         | 31.00806181                            |
| 830                                       | 0.674796748                      | 0.015407171                                      | 0.002835532                                         | 12.78795181                            |
| 4955.006448                               | 0.682668501                      | 0.015004404                                      | 0.001003749                                         | 74.46685472                            |
| 1593                                      | 0.614109483                      | 0.017863385                                      | 0.003573543                                         | 28.45637163                            |
| 3026.010547                               | 0.784587536                      | 0.011320829                                      | 0.000793054                                         | 34.34739618                            |
| 2454.000814                               | 0.672324117                      | 0.015980939                                      | 0.002398124                                         | 39.24918567                            |
| 1760.001135                               | 0.708199357                      | 0.013711717                                      | 0.001918208                                         | 24.1600454                             |
| 847                                       | 0.662754304                      | 0.019042136                                      | 0.003385483                                         | 16.12868949                            |
| 1828                                      | 0.665938069                      | 0.016362899                                      | 0.00118574                                          | 29.91137856                            |
| 2905.000688                               | 0.637220517                      | 0.016128347                                      | 0.002172519                                         | 46.88510492                            |
| 555                                       | 0.637198622                      | 0.023150718                                      | 0.007513795                                         | 12.84864865                            |
| 637                                       | 0.74853114                       | 0.018545034                                      | 0.003222652                                         | 11.81318681                            |
| 700.0451977                               | 0.523668639                      | 0.028527882                                      | 0.004478355                                         | 20.19774011                            |
| 1717                                      | 0.668353445                      | 0.015192554                                      | 0.003348069                                         | 26.08561444                            |
| 2471                                      | 0.733016909                      | 0.012976591                                      | 0.000966369                                         | 32.06515581                            |
| 3077.010373                               | 0.68373227                       | 0.016939497                                      | 0.001542386                                         | 52.25834684                            |
| 697                                       | 0.63134058                       | 0.019265639                                      | 0.008944302                                         | 13.42180775                            |
| 829                                       | 0.623308271                      | 0.01888275                                       | 0.005811203                                         | 15.65379976                            |
| 1204                                      | 0.617435897                      | 0.022650136                                      | 0.005492045                                         | 27.27076412                            |
| 2807.025541                               | 0.696909765                      | 0.013217838                                      | 0.002177301                                         | 37.26108549                            |
| 2186                                      | 0.632157316                      | 0.015005244                                      | 0.003913637                                         | 32.80146386                            |
| 1114                                      | 0.675970874                      | 0.020958972                                      | 0.00290981                                          | 23.34829443                            |
| 5923.075592                               | 0.652097711                      | 0.01040952                                       | 0.000814199                                         | 89.82479422                            |
| 1158.006885                               | 0.657984145                      | 0.020261523                                      | 0.006894818                                         | 23.54388985                            |
| 1703                                      | 0.637827715                      | 0.019247234                                      | 0.003935545                                         | 32.77803876                            |
| 3296.135298                               | 0.574537917                      | 0.020949034                                      | 0.001200497                                         | 69.67488827                            |
| 4933.806291                               | 0.658926932                      | 0.014355585                                      | 0.000903188                                         | 72.10810273                            |
| 467                                       | 0.591139241                      | 0.026984396                                      | 0.006717775                                         | 12.60171306                            |
| 2111.033914                               | 0.549715173                      | 0.022914587                                      | 0.001820815                                         | 48.64766839                            |
| 749                                       | 0.574386503                      | 0.023295859                                      | 0.005915981                                         | 17.44859813                            |
| 4191.10661                                | 0.67536                          | 0.0147424                                        | 0.000892147                                         | 62.22767117                            |
| 4138                                      | 0.706505037                      | 0.012164543                                      | 0.001342317                                         | 50.33687772                            |
| 1683                                      | 0.580745342                      | 0.020695932                                      | 0.003017134                                         | 34.83125371                            |
| 777                                       | 0.598152425                      | 0.021199909                                      | 0.004122716                                         | 16.47232947                            |
| 2449.065667                               | 0.575058275                      | 0.02074715                                       | 0.005582148                                         | 51.18321848                            |
| 1341                                      | 0.588415972                      | 0.017771972                                      | 0.004134443                                         | 23.83221477                            |
| 1656.004819                               | 0.734838424                      | 0.014163159                                      | 0.002295473                                         | 23.51084337                            |
| 2071.061332                               | 0.666560204                      | 0.014550338                                      | 0.000855607                                         | 30.36655486                            |
| 922                                       | 0.687034277                      | 0.016763049                                      | 0.003024105                                         | 15.45553145                            |
| 1599                                      | 0.66736227                       | 0.015696568                                      | 0.00373107                                          | 25.09881176                            |
| 541                                       | 0.564718163                      | 0.030644285                                      | 0.012652655                                         | 16.57855823                            |
| 1101                                      | 0.644991213                      | 0.018883832                                      | 0.006056241                                         | 20.791099                              |
| 1720                                      | 0.73535699                       | 0.011007977                                      | 0.00239952                                          | 18.93372093                            |
| 1484                                      | 0.74610357                       | 0.013754986                                      | 0.00263965                                          | 20.41239892                            |
| 1125                                      | 0.625347415                      | 0.020501333                                      | 0.002211266                                         | 23.064                                 |
| 1727.001157                               | 0.528907923                      | 0.017150698                                      | 0.004409932                                         | 29.65355697                            |
| 2040                                      | 0.663846404                      | 0.01546857                                       | 0.003238183                                         | 31.55588235                            |
| 1702.010539                               | 0.700287003                      | 0.017148259                                      | 0.002113269                                         | 29.28922717                            |
| 658                                       | 0.429503916                      | 0.03854824                                       | 0.017373075                                         | 25.36474164                            |
| 1653                                      | 0.693081761                      | 0.012057858                                      | 0.002756458                                         | 19.93163944                            |
| 1672                                      | 0.609773888                      | 0.018846152                                      | 0.002824346                                         | 31.51076555                            |
| 923                                       | 0.630464481                      | 0.018955805                                      | 0.00599749                                          | 17.49620802                            |
| 1193                                      | 0.589135802                      | 0.021854925                                      | 0.003944012                                         | 26.0729254                             |
| 532                                       | 0.40797546                       | 0.033424272                                      | 0.00895387                                          | 17.78195489                            |
| 1749.018213                               | 0.737615449                      | 0.012837179                                      | 0.001799898                                         | 22.55492316                            |
| 3542.223339                               | 0.691105537                      | 0.016985324                                      | 0.001518246                                         | 60.84142937                            |
| 2219                                      | 0.672424242                      | 0.013571391                                      | 0.001786939                                         | 30.11491663                            |
| 3036.016415                               | 0.699908088                      | 0.014899361                                      | 0.001298512                                         | 45.38345371                            |
| 2085.015289                               | 0.611630625                      | 0.017702172                                      | 0.002600937                                         | 37.05064501                            |
| 1907                                      | 0.676961306                      | 0.012784022                                      | 0.003311422                                         | 24.37912952                            |
| 645                                       | 0.616045845                      | 0.020323298                                      | 0.007773984                                         | 13.10852713                            |
| 527                                       | 0.631894484                      | 0.020764846                                      | 0.007500238                                         | 10.943074                              |
| 3487.020577                               | 0.60599238                       | 0.015829861                                      | 0.001494409                                         | 55.38868248                            |



| wavelet.LLL_gldzm_HighIntensityLargeDistanceEmphasis | wavelet.LLL_gldzm_SmallDistanceEmphasis | wavelet.LLL_gldzm_SumVariance | wavelet.LLL_gldzm_Homogeneity1 | wavelet.LLL_gldzm_Homogeneity2 |
|------------------------------------------------------|-----------------------------------------|-------------------------------|--------------------------------|--------------------------------|
| 2337.699429                                          | 0.998097654                             | 6720.217532                   | 0.162158512                    | 0.086133979                    |
| 942.6899642                                          | 1                                       | 1792.72812                    | 0.2360691                      | 0.150606276                    |
| 2504.4563                                            | 1                                       | 6163.971693                   | 0.238254702                    | 0.155096733                    |
| 2125.057402                                          | 1                                       | 6286.978677                   | 0.17832397                     | 0.104435039                    |
| 1148.370794                                          | 1                                       | 2511.29012                    | 0.209601535                    | 0.125247138                    |
| 1137.191874                                          | 1                                       | 2506.288463                   | 0.19760072                     | 0.113484663                    |
| 3143.116524                                          | 0.997508995                             | 9018.965347                   | 0.212015514                    | 0.127657005                    |
| 1365.688919                                          | 0.998709566                             | 2860.496553                   | 0.241922509                    | 0.158179041                    |
| 2539.321562                                          | 0.999745331                             | 7588.058417                   | 0.197470959                    | 0.11793961                     |
| 1565.868603                                          | 1                                       | 3285.967909                   | 0.195990171                    | 0.114293224                    |
| 1286.773737                                          | 1                                       | 3172.058348                   | 0.201890666                    | 0.115882309                    |
| 1455.882161                                          | 0.997070313                             | 3475.595821                   | 0.193603333                    | 0.112061117                    |
| 809.8447607                                          | 1                                       | 1277.455304                   | 0.313541976                    | 0.235018975                    |
| 1729.537205                                          | 1                                       | 4097.386227                   | 0.194001075                    | 0.114587452                    |
| 2096.935583                                          | 1                                       | 5300.411696                   | 0.191510677                    | 0.114305685                    |
| 3078.007255                                          | 1                                       | 9094.983518                   | 0.235556109                    | 0.149585301                    |
| 1953.206561                                          | 1                                       | 6015.636952                   | 0.192161473                    | 0.107240757                    |
| 852.8729447                                          | 1                                       | 1671.275925                   | 0.250212935                    | 0.166444293                    |
| 984.3484456                                          | 1                                       | 2062.577379                   | 0.229432461                    | 0.143167217                    |
| 2244.915727                                          | 0.999554896                             | 6021.005627                   | 0.20356954                     | 0.120061985                    |
| 891.8767123                                          | 0.999486301                             | 1556.578028                   | 0.281039389                    | 0.198114438                    |
| 1132.27937                                           | 0.997851003                             | 2401.918153                   | 0.210347675                    | 0.123986269                    |
| 1179.616013                                          | 1                                       | 2404.926927                   | 0.234794476                    | 0.148408495                    |
| 2510.995457                                          | 0.999574106                             | 6673.372679                   | 0.194878242                    | 0.10249142                     |
| 1432.841746                                          | 1                                       | 2938.478052                   | 0.22476033                     | 0.142395555                    |
| 2233.133025                                          | 1                                       | 6747.969156                   | 0.169353774                    | 0.091225714                    |
| 3283.079733                                          | 1                                       | 9793.418868                   | 0.176997571                    | 0.096309401                    |
| 1989.776451                                          | 0.999573379                             | 5016.535402                   | 0.204104847                    | 0.122103943                    |
| 1376.583051                                          | 1                                       | 3521.504323                   | 0.218794263                    | 0.130834612                    |
| 900.4085366                                          | 1                                       | 2006.36213                    | 0.211658986                    | 0.126390144                    |
| 1469.282309                                          | 1                                       | 3000.312605                   | 0.235392939                    | 0.154604516                    |
| 1068.584085                                          | 1                                       | 2893.611622                   | 0.227352858                    | 0.142021493                    |
| 3988.045494                                          | 0.999015748                             | 13634.93994                   | 0.178036361                    | 0.095733888                    |
| 2810.357724                                          | 1                                       | 8576.05559                    | 0.190566434                    | 0.108142836                    |
| 1601.960549                                          | 0.996655232                             | 3940.619695                   | 0.200304191                    | 0.117867621                    |
| 1091.146484                                          | 0.999511719                             | 1984.048242                   | 0.2637995                      | 0.181220844                    |
| 1817.526992                                          | 0.999614396                             | 3746.743084                   | 0.249871003                    | 0.166740646                    |
| 4410.313067                                          | 0.997732617                             | 17447.41621                   | 0.237170377                    | 0.156941783                    |
| 2093.340964                                          | 1                                       | 5974.000771                   | 0.1984914                      | 0.110848272                    |
| 3040.777957                                          | 0.999395527                             | 9956.393059                   | 0.191187704                    | 0.107810949                    |
| 1772.373509                                          | 1                                       | 4236.742223                   | 0.214523097                    | 0.133419911                    |
| 6223.659196                                          | 0.999011206                             | 21427.25748                   | 0.142334704                    | 0.069648155                    |
| 2057.95684                                           | 0.999694625                             | 5058.343541                   | 0.190129103                    | 0.1101689                      |
| 2547.11975                                           | 0.999574347                             | 7370.076643                   | 0.175220984                    | 0.094143709                    |
| 1572.930342                                          | 1                                       | 4364.124094                   | 0.20129589                     | 0.115085771                    |
| 2884.904267                                          | 1                                       | 8527.833222                   | 0.199384757                    | 0.115684828                    |
| 1828.486756                                          | 0.999742002                             | 4321.652813                   | 0.214724154                    | 0.130899275                    |
| 866.3567568                                          | 1                                       | 1854.401292                   | 0.215384452                    | 0.127114123                    |
| 1581.836735                                          | 1                                       | 4729.219495                   | 0.165561941                    | 0.086336359                    |
| 968.8559322                                          | 0.995762712                             | 1903.368938                   | 0.262548684                    | 0.178314533                    |
| 2267.776937                                          | 1                                       | 6521.189839                   | 0.192587699                    | 0.109647188                    |
| 3843.911372                                          | 1                                       | 11767.00126                   | 0.169957833                    | 0.089222229                    |
| 1980.604214                                          | 0.999027553                             | 5447.376335                   | 0.188349989                    | 0.105611256                    |
| 1487.71736                                           | 1                                       | 2649.843859                   | 0.217764791                    | 0.136698566                    |
| 1250.855247                                          | 1                                       | 2684.797013                   | 0.211400644                    | 0.128078768                    |
| 954.0299003                                          | 1                                       | 2401.128565                   | 0.218523026                    | 0.130982064                    |
| 2919.310039                                          | 0.998403689                             | 8580.584928                   | 0.186243605                    | 0.103668492                    |
| 1852.881976                                          | 1                                       | 5211.079886                   | 0.206936098                    | 0.120553163                    |
| 1339.386894                                          | 1                                       | 3312.052286                   | 0.193902802                    | 0.108246841                    |
| 4971.958676                                          | 0.998110197                             | 19027.98336                   | 0.196572658                    | 0.121960412                    |
| 1084.240964                                          | 0.998709122                             | 2558.857531                   | 0.207960546                    | 0.120563912                    |
| 1377.42983                                           | 1                                       | 3170.271744                   | 0.209991164                    | 0.128354153                    |
| 2021.452195                                          | 0.996617559                             | 5592.421884                   | 0.2395296                      | 0.152834464                    |
| 3727.693808                                          | 0.993280908                             | 11781.64271                   | 0.198537677                    | 0.112178121                    |
| 872.1991435                                          | 1                                       | 1567.409335                   | 0.235405703                    | 0.150095776                    |
| 1677.921338                                          | 0.997880358                             | 4066.513779                   | 0.248346638                    | 0.163796496                    |
| 940.5794393                                          | 1                                       | 2401.572319                   | 0.229255278                    | 0.141939997                    |
| 3454.225065                                          | 0.997334755                             | 11080.30506                   | 0.191398929                    | 0.10704359                     |
| 3623.222571                                          | 1                                       | 7069.702538                   | 0.188195372                    | 0.107164318                    |
| 1320.480689                                          | 1                                       | 3100.171511                   | 0.239809981                    | 0.150601072                    |
| 1533.722008                                          | 1                                       | 3560.804365                   | 0.22261295                     | 0.139567296                    |
| 1180.893798                                          | 0.997263883                             | 2164.823494                   | 0.234045815                    | 0.150435335                    |
| 1490.235645                                          | 1                                       | 3368.054141                   | 0.223919034                    | 0.143512957                    |
| 2741.230723                                          | 0.999096386                             | 8281.101771                   | 0.163036428                    | 0.083994877                    |
| 5190.131289                                          | 0.99712506                              | 18456.3612                    | 0.199122677                    | 0.114182932                    |
| 2291.523861                                          | 1                                       | 7096.695478                   | 0.190033788                    | 0.105217921                    |
| 1845.03252                                           | 1                                       | 4198.484201                   | 0.205260355                    | 0.120010645                    |
| 497.4011091                                          | 1                                       | 986.4387545                   | 0.254006517                    | 0.167858122                    |
| 1368.721163                                          | 1                                       | 2828.992875                   | 0.214105447                    | 0.130041479                    |
| 3681.682558                                          | 1                                       | 11481.53305                   | 0.159570454                    | 0.082979829                    |
| 2384.510782                                          | 1                                       | 6730.842497                   | 0.166835112                    | 0.089832746                    |
| 1853.566222                                          | 1                                       | 4933.574001                   | 0.205751025                    | 0.126019035                    |
| 2248.682475                                          | 0.999566223                             | 4989.722686                   | 0.262865177                    | 0.183247244                    |
| 1831.02402                                           | 1                                       | 5434.25039                    | 0.191009391                    | 0.107271257                    |
| 1944.086066                                          | 0.99868267                              | 6088.302188                   | 0.178012396                    | 0.095631112                    |
| 372.5364742                                          | 1                                       | 534.501578                    | 0.309095498                    | 0.221881155                    |
| 2707.720508                                          | 1                                       | 7750.377589                   | 0.180980546                    | 0.10209362                     |
| 1481.639354                                          | 1                                       | 3078.145094                   | 0.222177769                    | 0.139712812                    |
| 1154.221018                                          | 1                                       | 2597.538294                   | 0.212030529                    | 0.12803175                     |
| 1234.274099                                          | 1                                       | 2686.482211                   | 0.230490303                    | 0.14684185                     |
| 759.9116541                                          | 1                                       | 847.8268457                   | 0.32612945                     | 0.242643934                    |
| 3060.923734                                          | 0.998292544                             | 8970.261825                   | 0.165828592                    | 0.085511845                    |
| 2131.286153                                          | 0.995812395                             | 6078.579719                   | 0.187374664                    | 0.103732644                    |
| 2582.790446                                          | 1                                       | 7161.847191                   | 0.201012154                    | 0.114875267                    |
| 2562.305318                                          | 0.998768877                             | 7695.713832                   | 0.178195096                    | 0.096236263                    |
| 1808.251792                                          | 0.998566651                             | 4139.927428                   | 0.220379802                    | 0.138288636                    |
| 2628.584164                                          | 1                                       | 7821.984727                   | 0.192169059                    | 0.110348122                    |
| 1754.72093                                           | 1                                       | 4573.190084                   | 0.207409633                    | 0.125444053                    |
| 1006.565465                                          | 1                                       | 2519.103141                   | 0.212343009                    | 0.126954288                    |
| 2848.287225                                          | 0.998713918                             | 8427.939606                   | 0.228989898                    | 0.14203396                     |









| wavelet.LLL_firstorder_MeanAbsoluteDeviation | wavelet.LLL_firstorder_Energy | wavelet.LLL_firstorder_RobustMeanAbsoluteDeviation | wavelet.LLL_firstorder_Median | wavelet.LLL_firstorder_TotalEnergy | wavelet.LLL_firstorder_Maximum |
|----------------------------------------------|-------------------------------|----------------------------------------------------|-------------------------------|------------------------------------|--------------------------------|
| 465.9270261                                  | 7276351589                    | 333.8224542                                        | -1889.992868                  | 1.96E+11                           | 242.3934585                    |
| 265.819455                                   | 3745283036                    | 158.0189218                                        | -2094.215775                  | 1.01E+11                           | -269.0566603                   |
| 464.1281511                                  | 6768177309                    | 326.7073275                                        | -2133.43945                   | 1.83E+11                           | -61.84327466                   |
| 538.7828939                                  | 2580943141                    | 375.3492906                                        | -1771.456264                  | 69685464812                        | 330.3160176                    |
| 317.6269932                                  | 8108797032                    | 212.162833                                         | -1932.861499                  | 2.19E+11                           | 183.0975923                    |
| 279.7951483                                  | 2742873181                    | 172.6553939                                        | -2107.876515                  | 74057575882                        | -273.6193416                   |
| 473.4802253                                  | 18715724118                   | 363.7581086                                        | -1788.498122                  | 5.05E+11                           | 136.3643772                    |
| 291.3317836                                  | 20951568992                   | 174.1617122                                        | -2114.233099                  | 5.66E+11                           | 443.2559915                    |
| 454.3059085                                  | 12117744643                   | 295.8238009                                        | -1721.865771                  | 3.27E+11                           | 528.1178329                    |
| 370.2782454                                  | 3618354028                    | 233.769301                                         | -1937.425624                  | 97695558753                        | 410.2277448                    |
| 292.3078827                                  | 2112796874                    | 207.5498298                                        | -1175.108521                  | 57045515595                        | 101.4739743                    |
| 295.624531                                   | 7306778721                    | 191.2405515                                        | -1834.359919                  | 1.97E+11                           | 141.2840585                    |
| 207.0652023                                  | 9121343505                    | 96.11463858                                        | -2289.609804                  | 2.46E+11                           | -134.4060635                   |
| 388.169504                                   | 6974379762                    | 227.4437275                                        | -2124.756573                  | 1.88E+11                           | 364.3467937                    |
| 352.1524344                                  | 7445072402                    | 230.63459                                          | -2036.983847                  | 2.01E+11                           | 23.40061165                    |
| 334.9865448                                  | 10000575914                   | 211.6335466                                        | -1477.754776                  | 2.70E+11                           | 498.7713914                    |
| 331.3366484                                  | 1697907058                    | 215.6484924                                        | -1211.121813                  | 45843490565                        | 431.2607617                    |
| 240.5071011                                  | 5073981685                    | 139.3164149                                        | -2094.41834                   | 1.37E+11                           | -152.1581072                   |
| 268.4206562                                  | 3745339436                    | 175.2308342                                        | -1744.569305                  | 1.01E+11                           | 60.33491421                    |
| 353.3809154                                  | 18074238785                   | 243.5273553                                        | -1955.200138                  | 4.88E+11                           | 418.0175543                    |
| 257.1957458                                  | 12184545604                   | 142.2043076                                        | -2089.282668                  | 3.29E+11                           | -15.12831457                   |
| 277.3994267                                  | 3014187179                    | 176.16922                                          | -1720.329952                  | 81383053841                        | 74.86523339                    |
| 326.823376                                   | 3896402716                    | 208.1309834                                        | -2062.784113                  | 1.05E+11                           | -288.9019393                   |
| 463.5673257                                  | 6987025490                    | 325.1788608                                        | -1645.677123                  | 1.89E+11                           | 104.3639792                    |
| 280.5729666                                  | 6749702832                    | 159.9496662                                        | -2397.556151                  | 1.82E+11                           | -155.0856546                   |
| 402.8294397                                  | 5241258257                    | 292.021729                                         | -1421.889767                  | 1.42E+11                           | 538.5372502                    |
| 419.6334985                                  | 8128749435                    | 296.6000986                                        | -1526.187188                  | 2.19E+11                           | 315.0353864                    |
| 330.0792668                                  | 8218738901                    | 207.6574354                                        | -1804.855248                  | 2.22E+11                           | 253.9013526                    |
| 246.4156882                                  | 1024877541                    | 148.763245                                         | -1515.053803                  | 27671693612                        | -36.08165984                   |
| 273.047978                                   | 6247331549                    | 187.0096599                                        | -1777.458384                  | 1.69E+11                           | -76.37716757                   |
| 350.1946118                                  | 18042025164                   | 230.482646                                         | -2070.213942                  | 4.87E+11                           | 181.3055821                    |
| 308.60164                                    | 7906227705                    | 226.5782145                                        | -1976.821727                  | 2.13E+11                           | -476.1105347                   |
| 367.4264803                                  | 3646154729                    | 249.7415603                                        | -951.6150264                  | 98446177694                        | 552.0947733                    |
| 436.0763983                                  | 5065971284                    | 304.7039258                                        | -1376.979146                  | 1.37E+11                           | 655.8718756                    |
| 354.0357174                                  | 11679169333                   | 250.6250485                                        | -1662.853538                  | 3.15E+11                           | 463.351693                     |
| 280.7779244                                  | 14222948663                   | 146.9430634                                        | -2276.625771                  | 3.84E+11                           | 135.2429424                    |
| 357.2738747                                  | 20216434938                   | 165.773474                                         | -2455.152109                  | 5.46E+11                           | 936.6851728                    |
| 706.3270337                                  | 14426707801                   | 518.4160832                                        | -1634.662894                  | 3.90E+11                           | 497.676325                     |
| 396.945346                                   | 2255081613                    | 289.6702091                                        | -1356.518809                  | 60887203551                        | 171.5348707                    |
| 378.0984501                                  | 8287400233                    | 273.1180219                                        | -961.0806774                  | 2.24E+11                           | 245.4682705                    |
| 402.2940679                                  | 10144829969                   | 243.8380279                                        | -2106.448694                  | 2.74E+11                           | 299.6097066                    |
| 504.2399639                                  | 5465958632                    | 367.1584815                                        | -987.0861886                  | 1.48E+11                           | 508.3143639                    |
| 392.019044                                   | 12979930205                   | 250.4907302                                        | -1948.857936                  | 3.50E+11                           | 464.7044281                    |
| 419.2401609                                  | 6284367929                    | 297.3765341                                        | -1556.508553                  | 1.70E+11                           | 226.4566583                    |
| 306.2667126                                  | 3214112918                    | 221.6112464                                        | -1560.966412                  | 86781048783                        | 193.5578868                    |
| 327.6032223                                  | 5654309266                    | 225.6341672                                        | -1385.707648                  | 1.53E+11                           | 155.7271861                    |
| 379.4852894                                  | 14530542050                   | 269.5075419                                        | -1846.670356                  | 3.92E+11                           | 684.2133056                    |
| 258.3655779                                  | 2492534253                    | 174.6377601                                        | -1723.828728                  | 67298424821                        | -280.2971989                   |
| 314.9454878                                  | 1538210546                    | 222.655872                                         | -1339.882305                  | 41531684751                        | -23.46471632                   |
| 204.0436453                                  | 4845887907                    | 110.6398566                                        | -1952.9242                    | 1.31E+11                           | -198.5668747                   |
| 374.3013604                                  | 8159572386                    | 253.2141531                                        | -1785.074219                  | 2.20E+11                           | 108.1726068                    |
| 435.7023921                                  | 7660948577                    | 312.9296559                                        | -1466.896857                  | 2.07E+11                           | 894.4490992                    |
| 333.2609593                                  | 10664786932                   | 233.3384122                                        | -1548.738286                  | 2.88E+11                           | -1.038493835                   |
| 387.4662671                                  | 5171672036                    | 234.7380697                                        | -2306.58886                   | 1.40E+11                           | 53.90079926                    |
| 300.6480908                                  | 5208579901                    | 185.2949704                                        | -2025.568543                  | 1.41E+11                           | -410.5015369                   |
| 256.8560012                                  | 6228466802                    | 175.0768542                                        | -1823.105541                  | 1.68E+11                           | -271.6655904                   |
| 443.6506167                                  | 7187241659                    | 305.8716504                                        | -1256.118856                  | 1.94E+11                           | 958.9810318                    |
| 421.9051174                                  | 11688731436                   | 292.683961                                         | -1879.727011                  | 3.16E+11                           | 307.687612                     |
| 285.5774035                                  | 5055372838                    | 181.2458427                                        | -1799.173273                  | 1.36E+11                           | 330.937554                     |
| 639.1910734                                  | 15109346399                   | 499.4412696                                        | -1054.162017                  | 4.08E+11                           | 742.7417043                    |
| 296.974439                                   | 6912818307                    | 191.9354136                                        | -2020.472874                  | 1.87E+11                           | -225.4774269                   |
| 333.3264683                                  | 11818977045                   | 211.1636901                                        | -2200.57847                   | 3.19E+11                           | -83.01050408                   |
| 251.4751908                                  | 6174274230                    | 163.6447817                                        | -1016.665272                  | 1.67E+11                           | 566.3431985                    |
| 396.8246438                                  | 20804982672                   | 284.2816524                                        | -1656.068608                  | 5.62E+11                           | 91.80581161                    |
| 233.6823411                                  | 2791354299                    | 126.7398676                                        | -1934.430757                  | 75366566079                        | -71.30359747                   |
| 270.1763915                                  | 19797876634                   | 151.8502848                                        | -2344.278235                  | 5.35E+11                           | 39.88170586                    |
| 263.4597874                                  | 5230762535                    | 169.7299655                                        | -2066.80484                   | 1.41E+11                           | -300.5004961                   |
| 381.9638531                                  | 13159894548                   | 260.3383457                                        | -1408.935335                  | 3.55E+11                           | 623.5018075                    |
| 570.3582267                                  | 14684790982                   | 365.5059633                                        | -1629.543741                  | 3.96E+11                           | 1282.965054                    |
| 274.9268718                                  | 9075123649                    | 177.8568342                                        | -1817.11374                   | 2.45E+11                           | 111.6047757                    |
| 336.0606272                                  | 4310636787                    | 182.5923325                                        | -1914.270119                  | 1.16E+11                           | 227.5094102                    |
| 317.0631003                                  | 18495661620                   | 191.8076026                                        | -2183.134518                  | 4.99E+11                           | 582.3625307                    |
| 364.3778416                                  | 8603123434                    | 239.393916                                         | -2036.424372                  | 2.32E+11                           | 370.1864898                    |
| 405.727264                                   | 4059915767                    | 288.5419243                                        | -1296.803657                  | 1.10E+11                           | 426.9007576                    |
| 375.5811189                                  | 4391498991                    | 242.0983798                                        | -1050.221118                  | 1.19E+11                           | 628.614799                     |
| 344.4011055                                  | 2362731725                    | 233.2459795                                        | -1293.17501                   | 63793756569                        | 30.35059688                    |
| 399.8126264                                  | 6175534521                    | 277.047365                                         | -1674.021057                  | 1.67E+11                           | 285.2670456                    |
| 193.1773413                                  | 4996185753                    | 117.9363395                                        | -2352.922614                  | 1.35E+11                           | -707.8404888                   |
| 347.4006991                                  | 6380943699                    | 216.2130823                                        | -2028.929489                  | 1.72E+11                           | 218.1538775                    |
| 546.8667522                                  | 4926652478                    | 410.76434                                          | -1310.125111                  | 1.33E+11                           | 540.9297639                    |
| 479.1211781                                  | 6956986488                    | 334.4084123                                        | -1928.763902                  | 1.88E+11                           | 701.8812829                    |
| 340.1981941                                  | 5926226243                    | 203.2915604                                        | -1899.034937                  | 1.60E+11                           | 301.5840666                    |
| 514.0257259                                  | 12566243409                   | 282.0534266                                        | -2135.440651                  | 3.39E+11                           | 668.6487847                    |
| 403.3875695                                  | 8520530833                    | 288.3593509                                        | -1684.14792                   | 2.30E+11                           | 130.472396                     |
| 331.855019                                   | 5230801395                    | 235.8803058                                        | -1436.226514                  | 1.41E+11                           | 174.3767821                    |
| 142.4382358                                  | 7312969044                    | 79.00721939                                        | -2234.578634                  | 1.97E+11                           | -409.0559242                   |
| 520.8223662                                  | 6199372664                    | 380.8668781                                        | -1613.51522                   | 1.67E+11                           | 501.8435875                    |
| 320.0998642                                  | 10436869358                   | 215.6278547                                        | -2045.829322                  | 2.82E+11                           | -210.814522                    |
| 332.7641021                                  | 4408740438                    | 239.6538337                                        | -1786.100652                  | 1.19E+11                           | 22.33388253                    |
| 302.2866148                                  | 7284116198                    | 181.8539844                                        | -1981.762123                  | 1.97E+11                           | 187.4517928                    |
| 190.2593764                                  | 6693023663                    | 76.2669793                                         | -2341.961305                  | 1.81E+11                           | -156.3769364                   |
| 455.4316146                                  | 3775162714                    | 330.6673651                                        | -1151.035146                  | 1.02E+11                           | 369.6005835                    |
| 336.3576891                                  | 12338478570                   | 228.6908886                                        | -1564.86723                   | 3.33E+11                           | 243.6427816                    |
| 412.305243                                   | 9277731096                    | 302.708341                                         | -1653.464054                  | 2.50E+11                           | 261.3759016                    |
| 388.5864033                                  | 6200718402                    | 276.1941796                                        | -1144.654966                  | 1.67E+11                           | 568.238373                     |
| 366.8447676                                  | 13620610857                   | 223.353754                                         | -2077.603981                  | 3.68E+11                           | 524.9706293                    |
| 510.7943549                                  | 8358935920                    | 343.0070513                                        | -1762.842506                  | 2.26E+11                           | 299.3393601                    |
| 441.2536677                                  | 4526028899                    | 225.5304174                                        | -2227.351227                  | 1.22E+11                           | 576.9321706                    |
| 294.4346706                                  | 1852197630                    | 206.5976599                                        | -1513.148692                  | 50009336002                        | -86.89184831                   |
| 361.7394339                                  | 14186866069                   | 261.7569046                                        | -1507.056315                  | 3.83E+11                           | 217.8389726                    |

| wavelet.LLL_firstorder_RootMeanSquared | wavelet.LLL_firstorder_90Percentile | wavelet.LLL_firstorder_Minimum | wavelet.LLL_firstorder_Entropy | wavelet.LLL_firstorder_StandardDeviation | wavelet.LLL_firstorder_Range |
|----------------------------------------|-------------------------------------|--------------------------------|--------------------------------|------------------------------------------|------------------------------|
| 1851.757653                            | -892.6515746                        | -2715.446389                   | 6.304349042                    | 574.1406855                              | 2957.839847                  |
| 2001.412078                            | -1459.84907                         | -2494.919664                   | 5.321154475                    | 358.9784793                              | 2225.863004                  |
| 2100.502409                            | -1148.93923                         | -2930.068951                   | 6.274433324                    | 579.3811208                              | 2868.225676                  |
| 1625.331441                            | -301.9794282                        | -2321.493307                   | 6.103922529                    | 663.0069647                              | 2651.809324                  |
| 1850.492656                            | -1214.126344                        | -2416.750017                   | 5.705598368                    | 410.4761031                              | 2599.84761                   |
| 2038.594726                            | -1512.320516                        | -2641.459069                   | 5.504380031                    | 377.2194389                              | 2367.839728                  |
| 1819.871248                            | -945.8357221                        | -2898.122849                   | 6.401679643                    | 559.3543807                              | 3034.487226                  |
| 2025.269542                            | -1452.279733                        | -2631.535969                   | 5.556644623                    | 404.6516336                              | 3074.79196                   |
| 1632.661616                            | -577.0526467                        | -2590.40688                    | 6.127581857                    | 580.3662874                              | 3118.524713                  |
| 1837.207188                            | -1085.702422                        | -2450.636159                   | 5.849590348                    | 491.2558919                              | 2860.863903                  |
| 1183.663354                            | -606.872592                         | -1871.558866                   | 5.772832798                    | 363.4834668                              | 1973.03284                   |
| 1780.440697                            | -1188.328914                        | -2485.170299                   | 5.720403817                    | 388.5852268                              | 2626.454357                  |
| 2210.330654                            | -1821.944383                        | -2576.368115                   | 4.859193283                    | 320.745265                               | 2441.962052                  |
| 2015.429672                            | -1255.484963                        | -2664.715815                   | 5.848392239                    | 531.6487455                              | 3029.062609                  |
| 1937.151686                            | -1159.591809                        | -2791.854165                   | 5.796035164                    | 452.0924759                              | 2815.254776                  |
| 1511.728667                            | -839.0660214                        | -2656.636781                   | 6.060233422                    | 452.8549677                              | 3155.408173                  |
| 1192.490131                            | -479.7906955                        | -2068.203975                   | 5.904282626                    | 428.8440594                              | 2499.464737                  |
| 2028.583596                            | -1582.984621                        | -2477.457095                   | 5.276320374                    | 344.9059043                              | 2325.298988                  |
| 1698.666983                            | -1180.914331                        | -2249.160407                   | 5.501904032                    | 352.557559                               | 2309.495321                  |
| 1864.533107                            | -1128.005821                        | -2780.267627                   | 5.898405574                    | 443.4883666                              | 3198.285181                  |
| 2007.306891                            | -1503.70396                         | -2410.746776                   | 5.31153289                     | 367.8645653                              | 2395.618462                  |
| 1671.376866                            | -1099.42665                         | -2258.749172                   | 5.596784594                    | 366.2538572                              | 2333.614405                  |
| 1950.661625                            | -1241.611086                        | -2498.547618                   | 5.552397489                    | 421.0220243                              | 2209.645678                  |
| 1624.685084                            | -613.5577748                        | -2544.417448                   | 6.363472337                    | 575.5540488                              | 2648.781428                  |
| 2302.651027                            | -1686.896719                        | -2973.560116                   | 5.387757686                    | 388.829635                               | 2818.474461                  |
| 1487.425592                            | -772.6878924                        | -2400.961269                   | 6.236714466                    | 495.6366464                              | 2939.498519                  |
| 1585.656149                            | -789.7783958                        | -2748.91859                    | 6.376732151                    | 520.668014                               | 3063.953977                  |
| 1725.006575                            | -1034.273913                        | -2569.810796                   | 5.764852865                    | 437.8208082                              | 2823.712149                  |
| 1514.19646                             | -966.8472369                        | -2264.511834                   | 5.511355866                    | 335.679067                               | 2228.430175                  |
| 1744.002318                            | -1221.686654                        | -2261.404988                   | 5.601325361                    | 349.4508358                              | 2185.02782                   |
| 1947.289057                            | -1180.347999                        | -2548.601971                   | 5.658391897                    | 447.1844093                              | 2729.907554                  |
| 1954.809378                            | -1402.556555                        | -2535.823343                   | 5.76116435                     | 376.8066111                              | 2059.712808                  |
| 1062.633553                            | -340.5296842                        | -2403.601835                   | 6.243254093                    | 469.6168616                              | 2955.696609                  |
| 1468.241282                            | -640.6711496                        | -2480.9275                     | 6.401211753                    | 549.0050886                              | 3136.799375                  |
| 1628.4796                              | -944.6085956                        | -2337.761344                   | 5.994479139                    | 442.576628                               | 2801.113037                  |
| 2177.742809                            | -1613.719465                        | -2640.017998                   | 5.3165937                      | 411.905254                               | 2775.26094                   |
| 2330.89361                             | -1658.257816                        | -2879.386043                   | 5.508427033                    | 559.6984016                              | 3816.071216                  |
| 1671.924602                            | 117.32394                           | -2953.763708                   | 6.708641524                    | 867.6428774                              | 3451.440033                  |
| 1354.030903                            | -534.2683381                        | -2243.857032                   | 6.140918365                    | 480.6522344                              | 2415.391902                  |
| 1067.682074                            | -331.8350713                        | -2202.279597                   | 6.223185662                    | 463.8811832                              | 2447.747804                  |
| 1977.595205                            | -1146.121717                        | -2602.123445                   | 5.850748667                    | 536.618964                               | 2901.733152                  |
| 1188.902073                            | -224.3894865                        | -2855.269428                   | 6.622936857                    | 615.8730167                              | 3363.583792                  |
| 1884.999948                            | -1078.496683                        | -2678.756467                   | 6.119399511                    | 516.0211896                              | 3143.460895                  |
| 1589.299013                            | -788.6570858                        | -2569.586326                   | 6.321656197                    | 519.6899541                              | 2796.042985                  |
| 1585.86107                             | -1040.697157                        | -2382.536478                   | 5.866916004                    | 376.5461505                              | 2576.904346                  |
| 1435.220421                            | -794.7019157                        | -2550.181122                   | 6.002121046                    | 418.9620015                              | 2705.908308                  |
| 1784.691961                            | -1032.537004                        | -2546.883532                   | 6.004058962                    | 470.8073652                              | 3231.906837                  |
| 1691.653806                            | -1206.921547                        | -2223.81179                    | 5.520645087                    | 332.4705209                              | 1943.514591                  |
| 1344.445223                            | -758.7947056                        | -2133.870356                   | 5.87395739                     | 392.0590767                              | 2110.40564                   |
| 1893.208023                            | -1497.978883                        | -2449.585816                   | 5.090752861                    | 296.5669551                              | 2251.018942                  |
| 1782.180337                            | -1074.532644                        | -2711.002995                   | 6.189276248                    | 475.92282                                | 2819.175602                  |
| 1507.515886                            | -674.790016                         | -2783.647189                   | 6.402498404                    | 537.319267                               | 3678.096288                  |
| 1537.41653                             | -867.1213805                        | -2404.861454                   | 5.976149119                    | 416.6506105                              | 2403.82296                   |
| 2164.367238                            | -1359.01311                         | -2707.745572                   | 5.706075564                    | 514.3149943                              | 2761.646372                  |
| 1978.94555                             | -1378.594684                        | -2576.827262                   | 5.748606901                    | 407.4793423                              | 2166.325725                  |
| 1787.200476                            | -1308.39585                         | -2369.670422                   | 5.568210037                    | 327.0756429                              | 2098.004831                  |
| 1332.97456                             | -468.4283958                        | -2361.834973                   | 6.430421348                    | 560.1396722                              | 3320.816005                  |
| 1838.53201                             | -1013.553848                        | -2597.550997                   | 6.208994694                    | 533.5952243                              | 2905.238609                  |
| 1751.451                               | -1190.555541                        | -2430.185929                   | 5.691048097                    | 381.9150972                              | 2761.123483                  |
| 1286.50428                             | 71.07355001                         | -2732.819991                   | 6.654202166                    | 761.7641256                              | 3475.516995                  |
| 1978.482538                            | -1407.412805                        | -2568.438218                   | 5.742346417                    | 393.7964242                              | 2342.960791                  |
| 2103.944667                            | -1403.010854                        | -2727.251548                   | 5.781915604                    | 437.5965624                              | 2644.241044                  |
| 1032.740438                            | -530.463581                         | -1946.817285                   | 5.669104806                    | 332.7979463                              | 2513.160844                  |
| 1652.040612                            | -901.2034049                        | -2930.803237                   | 6.26940317                     | 487.1188982                              | 3022.609048                  |
| 1879.72335                             | -1398.459869                        | -2366.670408                   | 5.244530439                    | 332.8407509                              | 2295.366811                  |
| 2264.139451                            | -1753.433625                        | -3000.535575                   | 5.518579428                    | 386.9959904                              | 3040.417281                  |
| 2002.828241                            | -1503.60716                         | -2535.729942                   | 5.508543915                    | 348.2070019                              | 2235.229446                  |
| 1451.062758                            | -711.0527858                        | -2693.003916                   | 6.273541139                    | 484.7398806                              | 3316.505723                  |
| 1583.420534                            | -214.629327                         | -2537.80812                    | 6.495987468                    | 743.3077509                              | 3820.773174                  |
| 1769.608049                            | -1225.049854                        | -2440.578515                   | 5.684383175                    | 360.7312272                              | 2552.183291                  |
| 1821.655041                            | -1088.782133                        | -2429.888755                   | 5.617632774                    | 474.1568925                              | 2657.398166                  |
| 2076.377383                            | -1452.019461                        | -2591.72205                    | 5.574205839                    | 434.22262                                | 3174.084581                  |
| 1942.924454                            | -1229.252783                        | -2544.793404                   | 5.830647539                    | 478.0255776                              | 2914.979894                  |
| 1340.630646                            | -558.4140989                        | -2367.708927                   | 6.300914319                    | 502.5234495                              | 2794.609865                  |
| 1184.308537                            | -466.3079303                        | -2755.330369                   | 6.243101111                    | 496.603163                               | 3383.945168                  |
| 1326.877862                            | -663.5002006                        | -2318.464763                   | 6.087301893                    | 436.7160324                              | 2348.81536                   |
| 1605.439226                            | -770.0392029                        | -2340.872121                   | 6.078825624                    | 501.5035677                              | 2626.139167                  |
| 2283.686759                            | -1901.23241                         | -2632.030046                   | 4.95798061                     | 261.8895528                              | 1924.189558                  |
| 1933.417725                            | -1180.150397                        | -2549.327244                   | 5.803703028                    | 460.0875131                              | 2767.481121                  |
| 1451.312225                            | -382.6398307                        | -2582.542972                   | 6.635289488                    | 656.1670771                              | 3123.427736                  |
| 1870.222116                            | -882.4090216                        | -2715.446389                   | 6.31837441                     | 602.8496147                              | 3417.327672                  |
| 1814.987056                            | -1145.789787                        | -2589.175505                   | 5.728229736                    | 471.68469                                | 2890.760312                  |
| 1960.62833                             | -610.7807287                        | -2586.970278                   | 5.795478743                    | 695.6343109                              | 3255.619063                  |
| 1665.144956                            | -903.7790101                        | -2452.811942                   | 6.197859271                    | 499.1558776                              | 2583.284338                  |
| 1464.462365                            | -886.531771                         | -2394.600262                   | 6.027643078                    | 411.7240447                              | 2568.977044                  |
| 2184.829167                            | -1937.057421                        | -2472.538383                   | 4.567507701                    | 214.7750566                              | 2063.482458                  |
| 1612.239957                            | -512.8475127                        | -2476.851412                   | 6.456770689                    | 634.303175                               | 2978.695                     |
| 1950.973626                            | -1294.16324                         | -2613.576291                   | 5.710863633                    | 405.529017                               | 2402.76177                   |
| 1735.348589                            | -1056.019298                        | -2315.313993                   | 5.791412704                    | 409.4935117                              | 2337.647876                  |
| 1896.600754                            | -1288.790735                        | -2450.480728                   | 5.56669045                     | 414.7102767                              | 2637.932521                  |
| 2265.543391                            | -1970.524197                        | -2619.632933                   | 4.564163203                    | 311.2024934                              | 2463.255996                  |
| 1258.916596                            | -315.3600956                        | -2347.479164                   | 6.420261503                    | 557.0663451                              | 2717.079748                  |
| 1542.908605                            | -891.3813739                        | -2468.891899                   | 6.028725339                    | 428.3862186                              | 2712.534681                  |
| 1676.733033                            | -898.9987431                        | -2655.185512                   | 6.281020909                    | 502.0590607                              | 2916.561414                  |
| 1193.648787                            | -421.6027859                        | -2187.128642                   | 6.225797813                    | 481.5987931                              | 2755.367015                  |
| 1995.070698                            | -1263.765403                        | -2689.657524                   | 5.925362492                    | 502.3963007                              | 3214.628153                  |
| 1722.590606                            | -587.9118845                        | -2630.524062                   | 6.450858955                    | 647.8891971                              | 2929.863427                  |
| 2079.147596                            | -1072.610277                        | -2606.193299                   | 5.712665226                    | 624.4245812                              | 3183.122547                  |
| 1490.255169                            | -915.2870548                        | -2066.890948                   | 5.717486177                    | 366.3528085                              | 1979.9991                    |
| 1567.490237                            | -953.7401346                        | -2671.903505                   | 6.121304289                    | 443.7701946                              | 2889.742478                  |

| wavelet.LLL_firstorder_Variance | wavelet.LLL_firstorder_10Percentile | wavelet.LLL_firstorder_Kurtosis | wavelet.LLL_firstorder_Mean | wavelet.LLL_glrIm_ShortRunLowGrayLevelEmphasis | wavelet.LLL_glrIm_GrayLevelVariance |
|---------------------------------|-------------------------------------|---------------------------------|-----------------------------|------------------------------------------------|-------------------------------------|
| 329637.5267                     | -23711.616126                       | 3.19117738                      | -1760.50245                 | 0.002566003                                    | 528.0668965                         |
| 128865.5486                     | -2274.118449                        | 5.733214577                     | -1968.955245                | 0.00737973                                     | 210.8204184                         |
| 335682.4832                     | -2751.314786                        | 2.838506891                     | -2019.016565                | 0.005508358                                    | 540.8104083                         |
| 439578.2352                     | -2077.336119                        | 3.128052502                     | -1483.955545                | 0.007615883                                    | 702.3274861                         |
| 168490.6312                     | -2194.113623                        | 4.958781224                     | -1804.39254                 | 0.005028463                                    | 273.4192917                         |
| 142294.5051                     | -2361.206247                        | 5.684571333                     | -2003.390614                | 0.004623372                                    | 231.3987493                         |
| 312877.3232                     | -2405.440868                        | 2.290703983                     | -1731.77771                 | 0.001737393                                    | 500.0868763                         |
| 163742.9446                     | -2321.291358                        | 8.553349048                     | -1984.432859                | 0.003435505                                    | 268.5887624                         |
| 336825.0276                     | -2063.063463                        | 3.685107016                     | -1526.02717                 | 0.001256218                                    | 533.0671558                         |
| 241332.3513                     | -2224.053661                        | 5.60522822                      | -1770.310114                | 0.005244364                                    | 392.2598818                         |
| 132120.2306                     | -1538.567662                        | 3.081336419                     | -1126.471795                | 0.003711193                                    | 213.1475091                         |
| 150998.4785                     | -2129.268356                        | 4.824492133                     | -1737.518517                | 0.002486769                                    | 244.8396755                         |
| 102877.525                      | -2413.901461                        | 11.67233621                     | -2186.934858                | 0.008242918                                    | 174.367956                          |
| 282650.3886                     | -2385.398029                        | 6.359569309                     | -1944.04382                 | 0.004462374                                    | 459.3794241                         |
| 204387.6067                     | -2301.198915                        | 4.212984852                     | -1883.658421                | 0.002155108                                    | 331.5655422                         |
| 205077.6217                     | -1925.486278                        | 4.523611375                     | -1442.305773                | 0.000918896                                    | 303.0144638                         |
| 183907.2273                     | -1555.308443                        | 3.854022211                     | -1112.710872                | 0.002069031                                    | 295.2921328                         |
| 118960.0828                     | -2286.124322                        | 9.123919564                     | -1999.047604                | 0.006815305                                    | 194.9066169                         |
| 124296.8324                     | -2010.315571                        | 4.718259263                     | -1661.677672                | 0.005848482                                    | 201.8483355                         |
| 196681.9313                     | -2244.258855                        | 3.958320101                     | -1811.022301                | 0.001185002                                    | 331.8122032                         |
| 135324.3384                     | -2276.244943                        | 8.227569646                     | -1973.31079                 | 0.011247413                                    | 223.7670265                         |
| 134141.8879                     | -2005.136309                        | 6.642565798                     | -1630.754041                | 0.004405034                                    | 218.5577966                         |
| 177259.5449                     | -2274.055021                        | 4.456282543                     | -1904.684024                | 0.007082461                                    | 288.3778766                         |
| 331262.4631                     | -2812.24665                         | 2.851224665                     | -1519.32194                 | 0.002462195                                    | 527.656164                          |
| 151188.4851                     | -2598.387669                        | 6.919601793                     | -2269.584382                | 0.002812614                                    | 248.2794117                         |
| 245655.6852                     | -2029.307101                        | 3.126039835                     | -1402.419055                | 0.002057735                                    | 393.8275957                         |
| 271087.6702                     | -2163.777972                        | 2.775688167                     | -1497.737545                | 0.001211728                                    | 433.8139364                         |
| 191687.0601                     | -2066.694086                        | 5.323491007                     | -1668.520489                | 0.001536157                                    | 311.2355104                         |
| 112680.436                      | -1855.229556                        | 4.248469111                     | -1476.51972                 | 0.005141141                                    | 183.6586868                         |
| 122115.8666                     | -2088.062885                        | 4.501009942                     | -1708.63343                 | 0.006577129                                    | 197.5141589                         |
| 199973.8959                     | -2285.986417                        | 4.312718972                     | -1895.24689                 | 0.003914169                                    | 326.6732646                         |
| 141983.2222                     | -2350.045598                        | 3.167964438                     | -1918.149233                | 0.008407866                                    | 227.2961871                         |
| 220539.9967                     | -1539.835608                        | 3.131945661                     | -953.2313839                | 0.00815136                                     | 354.7083771                         |
| 301406.5873                     | -2105.311229                        | 2.931350403                     | -1361.736345                | 0.002985868                                    | 481.8342309                         |
| 195874.0716                     | -2047.244639                        | 4.084165504                     | -1567.185929                | 0.003362608                                    | 315.3062709                         |
| 169665.9382                     | -2445.827152                        | 9.959197624                     | -2138.433493                | 0.006784875                                    | 280.5307284                         |
| 313262.3007                     | -2632.757746                        | 12.68613707                     | -2262.698106                | 0.00393462                                     | 518.2482381                         |
| 752804.1628                     | -2431.065534                        | 2.322995356                     | -1429.170288                | 0.001182229                                    | 1171.939598                         |
| 231026.5704                     | -1828.545076                        | 2.549994351                     | -1265.848773                | 0.002424677                                    | 371.369792                          |
| 215185.7521                     | -1589.717524                        | 2.42444119                      | -961.6440398                | 0.000942054                                    | 343.215116                          |
| 287959.9126                     | -2352.469995                        | 5.51494013                      | -1903.39772                 | 0.003855254                                    | 468.6660873                         |
| 379299.5727                     | -1855.093596                        | 2.547307507                     | -1016.950621                | 0.001149498                                    | 606.9895522                         |
| 266277.8682                     | -2319.442197                        | 4.819465935                     | -1812.993915                | 0.002528356                                    | 430.3643856                         |
| 270077.6484                     | -2157.708527                        | 2.922274737                     | -1501.929994                | 0.001941775                                    | 433.8131265                         |
| 141787.0035                     | -1999.546526                        | 3.014891153                     | -1540.509114                | 0.00388723                                     | 227.2004727                         |
| 175529.1587                     | -1889.138581                        | 3.210658618                     | -1372.708453                | 0.001010023                                    | 284.0755104                         |
| 221659.5751                     | -2209.77759                         | 3.825521362                     | -1721.471992                | 0.002319157                                    | 357.5768363                         |
| 110536.6473                     | -2012.869702                        | 4.285033692                     | -1658.660891                | 0.007042696                                    | 178.674466                          |
| 153710.3196                     | -1772.60207                         | 2.948585832                     | -1286.010357                | 0.00290135                                     | 246.7899559                         |
| 87951.95886                     | -2111.425474                        | 8.713374676                     | -1869.835463                | 0.003954196                                    | 145.3405422                         |
| 226502.5306                     | -2302.583894                        | 3.283118711                     | -1717.458652                | 0.003007083                                    | 364.2287794                         |
| 288711.9946                     | -2066.945268                        | 2.968375107                     | -1408.507065                | 0.00872306                                     | 463.5334467                         |
| 173597.7312                     | -1965.801009                        | 3.046405555                     | -1479.882379                | 0.001501886                                    | 279.594237                          |
| 264519.9134                     | -2524.822381                        | 5.291366032                     | -2102.371429                | 0.008779187                                    | 432.3348478                         |
| 166039.4144                     | -2360.245252                        | 4.928522439                     | -1936.539717                | 0.005381845                                    | 270.951557                          |
| 106978.4761                     | -2105.977525                        | 4.041075491                     | -1757.016523                | 0.005309411                                    | 172.8873248                         |
| 313756.4523                     | -1859.954213                        | 3.187570965                     | -1209.571214                | 0.002293279                                    | 500.4158126                         |
| 284723.8634                     | -2318.551647                        | 3.894792774                     | -1759.396513                | 0.0042202                                      | 457.6155555                         |
| 145859.1414                     | -2095.369863                        | 5.450428578                     | -1709.30438                 | 0.00273067                                     | 236.4754311                         |
| 580284.5831                     | -2091.356251                        | 1.948867401                     | -1036.729801                | 0.0007185                                      | 907.7800807                         |
| 155075.6238                     | -2353.132144                        | 4.800144646                     | -1938.895956                | 0.006453002                                    | 250.9619433                         |
| 191490.7514                     | -2462.510962                        | 6.698939424                     | -2057.934015                | 0.003982817                                    | 310.6569006                         |
| 110754.4731                     | -1360.879276                        | 4.586287479                     | -977.6493948                | 0.001259262                                    | 179.6552759                         |
| 237284.821                      | -2136.86067                         | 2.889285905                     | -1578.592209                | 0.000796738                                    | 381.3798469                         |
| 110782.9655                     | -2160.961881                        | 6.724175377                     | -1850.020786                | 0.006378495                                    | 181.4549515                         |
| 149765.8966                     | -2547.610155                        | 8.525281963                     | -2230.820826                | 0.00175401                                     | 246.1217496                         |
| 121248.1162                     | -2313.490587                        | 5.515947794                     | -1972.326759                | 0.006282429                                    | 197.0425909                         |
| 234972.7519                     | -1940.195759                        | 3.290591608                     | -1367.70259                 | 0.00081812                                     | 377.2274136                         |
| 552506.4125                     | -2103.776049                        | 4.248478998                     | -1398.110931                | 0.001414429                                    | 890.7679524                         |
| 130127.0182                     | -2103.422629                        | 4.761297418                     | -1732.450758                | 0.002958164                                    | 211.5865859                         |
| 224824.7587                     | -2130.52465                         | 6.810482472                     | -1758.863931                | 0.003843299                                    | 366.5606374                         |
| 188549.2837                     | -2387.959635                        | 8.1456484                       | -2030.466388                | 0.006064476                                    | 307.8165376                         |
| 228508.4528                     | -2326.005533                        | 5.53893853                      | -1883.201259                | 0.004703994                                    | 371.2448837                         |
| 252529.8173                     | -1851.310465                        | 2.912142463                     | -1242.854906                | 0.002103737                                    | 404.8330543                         |
| 246614.7015                     | -1808.198032                        | 3.300920125                     | -1075.161387                | 0.000679105                                    | 398.2121748                         |
| 190720.893                      | -1829.998899                        | 2.885190424                     | -1252.950106                | 0.002663682                                    | 306.6370255                         |
| 251505.8284                     | -2032.316806                        | 3.73582252                      | -1525.099761                | 0.003660364                                    | 406.1256743                         |
| 68586.13789                     | -2503.684129                        | 7.529144766                     | -2268.620522                | 0.012397374                                    | 112.9946611                         |
| 211680.5198                     | -2293.937448                        | 5.009600837                     | -1877.877414                | 0.007271085                                    | 343.6690827                         |
| 430555.2331                     | -2192.759176                        | 2.177536786                     | -1294.508378                | 0.00266985                                     | 684.9951379                         |
| 363427.658                      | -2381.057876                        | 4.068511858                     | -1770.396313                | 0.002699378                                    | 583.3641442                         |
| 222486.4468                     | -2165.147504                        | 7.199395437                     | -1752.624194                | 0.002034225                                    | 359.0755105                         |
| 483907.0945                     | -2334.356433                        | 4.957952632                     | -1833.072926                | 0.004424081                                    | 771.8204457                         |
| 249156.5901                     | -2149.493158                        | 3.408373058                     | -1588.568895                | 0.003417731                                    | 398.1904862                         |
| 169516.689                      | -1923.360905                        | 3.043925818                     | -1405.394368                | 0.001851068                                    | 271.5823202                         |
| 46128.32492                     | -2346.082422                        | 14.19819441                     | -2174.247034                | 0.01682681                                     | 77.14102514                         |
| 402340.5178                     | -2195.252539                        | 2.782509818                     | -1482.220348                | 0.002925322                                    | 643.6907608                         |
| 164453.7836                     | -2294.229439                        | 4.201107691                     | -1908.361681                | 0.00294091                                     | 267.7790487                         |
| 167684.9361                     | -2125.314471                        | 3.257893803                     | -1686.342133                | 0.006537577                                    | 168.5774645                         |
| 171984.6136                     | -2226.906597                        | 6.822055438                     | -1850.705218                | 0.004065358                                    | 280.9570243                         |
| 96846.99192                     | -2445.192715                        | 12.56217977                     | -2244.067705                | 0.009206428                                    | 165.2489815                         |
| 310322.9129                     | -1867.133157                        | 2.394974271                     | -1128.958849                | 0.00169619                                     | 495.2548975                         |
| 183514.7523                     | -1952.743784                        | 3.788900321                     | -1482.245665                | 0.001517388                                    | 295.8931971                         |
| 252063.3004                     | -2236.303906                        | 2.575885356                     | -1599.803227                | 0.001718022                                    | 404.9941377                         |
| 231937.3975                     | -1686.511693                        | 2.914282558                     | -1092.181317                | 0.001278699                                    | 370.8219713                         |
| 252402.0429                     | -2389.150515                        | 6.727128777                     | -1930.778552                | 0.002858163                                    | 410.5695567                         |
| 419760.4117                     | -2296.98442                         | 3.321825525                     | -1596.107134                | 0.003412084                                    | 666.0957555                         |
| 389906.0576                     | -2436.425232                        | 6.657336785                     | -1983.166324                | 0.009230815                                    | 634.714167                          |
| 134214.3803                     | -1859.539727                        | 3.207479764                     | -1444.522789                | 0.007957761                                    | 215.5341621                         |
| 196931.9856                     | -2016.207509                        | 3.091765813                     | -1503.360788                | 0.001652014                                    | 316.9675406                         |



| wavelet.LLL_glrIm_LowGrayLevelRunEmphasis | wavelet.LLL_glrIm_GrayLevelNonUniformityNormalized | wavelet.LLL_glrIm_RunVariance | wavelet.LLL_glrIm_GrayLevelNonUniformity | wavelet.LLL_glrIm_LongRunEmphasis |
|-------------------------------------------|----------------------------------------------------|-------------------------------|------------------------------------------|-----------------------------------|
| 0.002619844                               | 0.014922116                                        | 0.02520327                    | 30.9281022                               | 1.073515913                       |
| 0.007651179                               | 0.034178632                                        | 0.044911274                   | 30.67888837                              | 1.13092647                        |
| 0.005805551                               | 0.015513477                                        | 0.055145028                   | 22.70580674                              | 1.155311791                       |
| 0.007939666                               | 0.019144349                                        | 0.037224993                   | 18.09184459                              | 1.106747995                       |
| 0.005193809                               | 0.024196954                                        | 0.039364548                   | 55.24190431                              | 1.115993593                       |
| 0.00470939                                | 0.028051109                                        | 0.033277813                   | 17.94294773                              | 1.098485018                       |
| 0.001789988                               | 0.013041501                                        | 0.041898371                   | 71.03351045                              | 1.118637679                       |
| 0.003561656                               | 0.029026828                                        | 0.054760548                   | 141.3017866                              | 1.156605845                       |
| 0.001288819                               | 0.018327952                                        | 0.039681283                   | 80.41233184                              | 1.113828434                       |
| 0.005396198                               | 0.022473304                                        | 0.035827021                   | 23.31186862                              | 1.104342227                       |
| 0.003783083                               | 0.021212248                                        | 0.034902575                   | 30.9620766                               | 1.102690213                       |
| 0.002547228                               | 0.023308218                                        | 0.034048168                   | 52.02222025                              | 1.101071172                       |
| 0.008757866                               | 0.049515401                                        | 0.097758309                   | 85.20256262                              | 1.277679454                       |
| 0.004613139                               | 0.023773075                                        | 0.037677904                   | 39.41823704                              | 1.110487815                       |
| 0.002228251                               | 0.023300539                                        | 0.042013973                   | 44.58754479                              | 1.117557574                       |
| 0.000942185                               | 0.018908225                                        | 0.05128852                    | 79.00049212                              | 1.148724672                       |
| 0.002098486                               | 0.020878623                                        | 0.031701655                   | 24.20949353                              | 1.092675326                       |
| 0.007114068                               | 0.033845481                                        | 0.057011872                   | 39.68677436                              | 1.163722368                       |
| 0.006012595                               | 0.026862839                                        | 0.045236988                   | 33.45867473                              | 1.131942383                       |
| 0.001216529                               | 0.021222496                                        | 0.038317117                   | 106.6002743                              | 1.110039589                       |
| 0.012072843                               | 0.033758903                                        | 0.076885054                   | 95.71477505                              | 1.215775589                       |
| 0.004518304                               | 0.025357584                                        | 0.036739883                   | 26.44882185                              | 1.10734063                        |
| 0.007287111                               | 0.02911955                                         | 0.044350122                   | 28.62282054                              | 1.130271114                       |
| 0.002541428                               | 0.014072604                                        | 0.034986814                   | 36.10092079                              | 1.100172353                       |
| 0.002897599                               | 0.03205521                                         | 0.049971046                   | 39.03118692                              | 1.143821813                       |
| 0.002096372                               | 0.015055775                                        | 0.026987463                   | 34.77098741                              | 1.079419254                       |
| 0.001240974                               | 0.013720943                                        | 0.030103607                   | 43.12607913                              | 1.088407065                       |
| 0.001577097                               | 0.023808513                                        | 0.040596613                   | 63.38416703                              | 1.117473092                       |
| 0.005204742                               | 0.028200268                                        | 0.037628306                   | 12.17214541                              | 1.111073425                       |
| 0.006865894                               | 0.024205223                                        | 0.037947763                   | 47.96933974                              | 1.11295156                        |
| 0.00410479                                | 0.026790233                                        | 0.058800953                   | 121.2754132                              | 1.164899498                       |
| 0.008816534                               | 0.020801684                                        | 0.049749934                   | 41.17645975                              | 1.143049536                       |
| 0.000823559                               | 0.015706176                                        | 0.027916864                   | 49.37324777                              | 1.083298745                       |
| 0.003090002                               | 0.013592203                                        | 0.032194196                   | 30.98854711                              | 1.095018036                       |
| 0.003484855                               | 0.018443419                                        | 0.037493042                   | 78.48664856                              | 1.108799899                       |
| 0.007107379                               | 0.035743496                                        | 0.066089918                   | 101.260561                               | 1.187760511                       |
| 0.004133832                               | 0.032852463                                        | 0.062179118                   | 115.7817362                              | 1.178287525                       |
| 0.001214028                               | 0.010950082                                        | 0.061548704                   | 53.68718027                              | 1.17051066                        |
| 0.002460518                               | 0.016093293                                        | 0.03124276                    | 19.21667182                              | 1.092722542                       |
| 0.000963221                               | 0.014846308                                        | 0.033114895                   | 104.6706967                              | 1.096642538                       |
| 0.004002596                               | 0.024179104                                        | 0.046073511                   | 60.26679137                              | 1.130019336                       |
| 0.001184385                               | 0.011369161                                        | 0.019549581                   | 43.1511535                               | 1.057732274                       |
| 0.002606018                               | 0.018094196                                        | 0.035567384                   | 63.99875749                              | 1.102732667                       |
| 0.001985252                               | 0.014128829                                        | 0.029072819                   | 34.20382199                              | 1.085687795                       |
| 0.004008481                               | 0.019448458                                        | 0.036352383                   | 24.04955592                              | 1.104775126                       |
| 0.001027045                               | 0.018268772                                        | 0.036790667                   | 48.49768598                              | 1.106402501                       |
| 0.002401397                               | 0.018778461                                        | 0.04105018                    | 82.55593844                              | 1.118343765                       |
| 0.007222257                               | 0.025800582                                        | 0.037107416                   | 21.71661194                              | 1.108399102                       |
| 0.002935203                               | 0.019684853                                        | 0.024983995                   | 16.36457876                              | 1.07325519                        |
| 0.004093742                               | 0.040637752                                        | 0.059616895                   | 52.1327049                               | 1.171124598                       |
| 0.003064891                               | 0.016254847                                        | 0.034019852                   | 40.4544002                               | 1.099969785                       |
| 0.0008841                                 | 0.013400149                                        | 0.025725827                   | 44.08566345                              | 1.075753041                       |
| 0.001538554                               | 0.018189384                                        | 0.032539099                   | 79.62702156                              | 1.095083272                       |
| 0.00902831                                | 0.026708207                                        | 0.042056121                   | 28.37557675                              | 1.122694422                       |
| 0.005516541                               | 0.0229723                                          | 0.041114673                   | 29.44456461                              | 1.1185286                         |
| 0.005455669                               | 0.025056225                                        | 0.03918351                    | 47.08279503                              | 1.116357333                       |
| 0.002356597                               | 0.013361056                                        | 0.031547411                   | 52.4775033                               | 1.092447709                       |
| 0.004378183                               | 0.016146111                                        | 0.039188887                   | 53.85420426                              | 1.114514601                       |
| 0.002789291                               | 0.023999063                                        | 0.032064348                   | 38.36667255                              | 1.095203287                       |
| 0.000732493                               | 0.011153571                                        | 0.05324134                    | 97.65135414                              | 1.141196772                       |
| 0.006593395                               | 0.022655018                                        | 0.034035647                   | 38.7585048                               | 1.099985075                       |
| 0.004109873                               | 0.023629761                                        | 0.042403748                   | 60.7879086                               | 1.120156249                       |
| 0.001304486                               | 0.023922378                                        | 0.049617841                   | 132.4574577                              | 1.143088398                       |
| 0.000810881                               | 0.015142678                                        | 0.033874107                   | 111.8230606                              | 1.099764366                       |
| 0.006583069                               | 0.034646881                                        | 0.043656308                   | 26.25764182                              | 1.130914791                       |
| 0.001826712                               | 0.030146979                                        | 0.059700627                   | 110.4724986                              | 1.171091376                       |
| 0.006512671                               | 0.027500173                                        | 0.045771634                   | 34.36818607                              | 1.135078255                       |
| 0.000833713                               | 0.015332245                                        | 0.032254966                   | 92.96191696                              | 1.095053103                       |
| 0.001451622                               | 0.013905822                                        | 0.029932348                   | 79.23972938                              | 1.086624077                       |
| 0.003060946                               | 0.024125515                                        | 0.047350672                   | 66.97985795                              | 1.137403257                       |
| 0.003956824                               | 0.028723308                                        | 0.045779754                   | 35.8051789                               | 1.132676277                       |
| 0.006330913                               | 0.02879547                                         | 0.05182738                    | 117.9988146                              | 1.148286338                       |
| 0.004918572                               | 0.022447409                                        | 0.051445469                   | 48.93343391                              | 1.145464553                       |
| 0.002136097                               | 0.014481045                                        | 0.025021912                   | 31.9461716                               | 1.073695199                       |
| 0.000686396                               | 0.016442416                                        | 0.033413272                   | 49.88562016                              | 1.098575319                       |
| 0.002703525                               | 0.017372636                                        | 0.029997084                   | 22.65004281                              | 1.089880185                       |
| 0.003760272                               | 0.018281112                                        | 0.035562458                   | 42.40330266                              | 1.102987438                       |
| 0.012893082                               | 0.041918787                                        | 0.056479207                   | 38.19565162                              | 1.162824453                       |
| 0.007550285                               | 0.023347458                                        | 0.039111936                   | 38.42702527                              | 1.115251967                       |
| 0.00274362                                | 0.010876816                                        | 0.025107603                   | 24.8325324                               | 1.074908507                       |
| 0.002756057                               | 0.01532301                                         | 0.0251901                     | 29.77293709                              | 1.073260612                       |
| 0.002093777                               | 0.024718224                                        | 0.045768771                   | 42.69110145                              | 1.131260966                       |
| 0.004640325                               | 0.027346978                                        | 0.071416723                   | 84.25101658                              | 1.198909803                       |
| 0.003515695                               | 0.015629841                                        | 0.033935447                   | 46.54314039                              | 1.099198002                       |
| 0.001875                                  | 0.01747129                                         | 0.028534261                   | 41.48557926                              | 1.084077984                       |
| 0.01772054                                | 0.05585856                                         | 0.079422584                   | 79.88314901                              | 1.228535564                       |
| 0.003017923                               | 0.013051907                                        | 0.033474138                   | 30.2168221                               | 1.095269411                       |
| 0.003050722                               | 0.024487197                                        | 0.045184546                   | 64.45766685                              | 1.130872681                       |
| 0.006809082                               | 0.021303391                                        | 0.040913941                   | 30.05228314                              | 1.118594737                       |
| 0.004230437                               | 0.027968247                                        | 0.049772053                   | 54.16899191                              | 1.143673163                       |
| 0.00985567                                | 0.060981184                                        | 0.094435724                   | 73.30372935                              | 1.27309254                        |
| 0.001722686                               | 0.012904244                                        | 0.024503023                   | 30.03111258                              | 1.072503151                       |
| 0.001552001                               | 0.018456532                                        | 0.030225149                   | 92.99295112                              | 1.088676311                       |
| 0.001760953                               | 0.014204454                                        | 0.03387676                    | 45.41427723                              | 1.099494739                       |
| 0.001306748                               | 0.015137044                                        | 0.029424593                   | 64.07607441                              | 1.086611481                       |
| 0.002974377                               | 0.021204762                                        | 0.045847796                   | 69.59958638                              | 1.133296483                       |
| 0.00350181                                | 0.013448008                                        | 0.033727332                   | 36.70765115                              | 1.09913113                        |
| 0.009608771                               | 0.028147739                                        | 0.042699217                   | 28.35279785                              | 1.124009398                       |
| 0.008243745                               | 0.022073125                                        | 0.036669944                   | 17.77886745                              | 1.109108565                       |
| 0.001716271                               | 0.016756167                                        | 0.045477506                   | 92.8652121                               | 1.131416581                       |

| wavelet.LLL_glrIm_ShortRunHighGrayLevelEmphasis | wavelet.LLL_glrIm_RunLengthNonUniformity | wavelet.LLL_glrIm_ShortRunEmphasis | wavelet.LLL_glrIm_LongRunHighGrayLevelEmphasis | wavelet.LLL_glrIm_RunPercentage |
|-------------------------------------------------|------------------------------------------|------------------------------------|------------------------------------------------|---------------------------------|
| 2055.392885                                     | 1979.465038                              | 0.982613231                        | 2160.539218                                    | 0.976727325                     |
| 687.6529955                                     | 829.3392096                              | 0.969862347                        | 730.370954                                     | 0.959851913                     |
| 1967.756699                                     | 1340.060522                              | 0.966024551                        | 2165.697913                                    | 0.954016648                     |
| 1858.916223                                     | 886.6369969                              | 0.975697576                        | 2019.053447                                    | 0.96716794                      |
| 914.5729786                                     | 2126.476424                              | 0.972917582                        | 981.2809882                                    | 0.964039761                     |
| 926.5917741                                     | 601.5506976                              | 0.976669755                        | 981.8977964                                    | 0.969114219                     |
| 2715.289869                                     | 5078.492226                              | 0.973362829                        | 2977.199777                                    | 0.963832133                     |
| 1007.984198                                     | 4441.11546                               | 0.965011428                        | 1095.45035                                     | 0.952909463                     |
| 2371.485313                                     | 4098.887164                              | 0.974077715                        | 2700.958639                                    | 0.965091881                     |
| 1225.086651                                     | 973.2541241                              | 0.975787742                        | 1279.576187                                    | 0.967566016                     |
| 1128.370089                                     | 1369.977437                              | 0.975892335                        | 1232.85429                                     | 0.967914711                     |
| 1202.374224                                     | 2095.434772                              | 0.976024502                        | 1288.853263                                    | 0.968262973                     |
| 467.4704307                                     | 1475.377431                              | 0.940840667                        | 527.3096848                                    | 0.921387664                     |
| 1349.475798                                     | 1549.320966                              | 0.974227431                        | 1427.02482                                     | 0.96563774                      |
| 1714.119239                                     | 1786.23876                               | 0.973773307                        | 1840.585629                                    | 0.96444634                      |
| 2745.580431                                     | 3821.274213                              | 0.966059262                        | 3186.373493                                    | 0.954753199                     |
| 1796.137947                                     | 1095.70108                               | 0.97839564                         | 1955.384769                                    | 0.971073315                     |
| 618.3516056                                     | 1065.431972                              | 0.963387668                        | 674.9282589                                    | 0.950901491                     |
| 776.7372373                                     | 1150.038383                              | 0.969616741                        | 847.5121284                                    | 0.959523527                     |
| 1909.941167                                     | 4701.329296                              | 0.974841992                        | 2079.938034                                    | 0.966102949                     |
| 575.1932283                                     | 2511.894009                              | 0.953661039                        | 628.126748                                     | 0.937474562                     |
| 907.7258959                                     | 976.7186871                              | 0.975030504                        | 971.4018356                                    | 0.966635774                     |
| 883.7261469                                     | 907.6086456                              | 0.969710664                        | 943.7415321                                    | 0.959810697                     |
| 2243.11644                                      | 2416.063737                              | 0.977114718                        | 2466.620117                                    | 0.969137776                     |
| 1073.481461                                     | 1118.299786                              | 0.967538132                        | 1166.83707                                     | 0.956432413                     |
| 2087.000383                                     | 2197.55269                               | 0.981170518                        | 2253.592053                                    | 0.974867682                     |
| 2968.612271                                     | 2975.274409                              | 0.979174156                        | 3209.916165                                    | 0.972185872                     |
| 1655.934779                                     | 2480.010155                              | 0.973029842                        | 1799.154996                                    | 0.963822202                     |
| 1220.59627                                      | 403.3488696                              | 0.974059257                        | 1348.124629                                    | 0.965582516                     |
| 733.5865009                                     | 1847.970205                              | 0.973307019                        | 789.0255457                                    | 0.964796644                     |
| 1051.450084                                     | 4120.641429                              | 0.964035007                        | 1128.349614                                    | 0.95122385                      |
| 888.114426                                      | 1818.246834                              | 0.96760809                         | 984.1935727                                    | 0.956686619                     |
| 3807.462311                                     | 2981.871512                              | 0.979982891                        | 4190.682274                                    | 0.973533125                     |
| 2571.164375                                     | 2148.759375                              | 0.977514754                        | 2812.987042                                    | 0.9701473                       |
| 1327.327187                                     | 3982.681613                              | 0.974834887                        | 1426.065293                                    | 0.966271921                     |
| 725.3549245                                     | 2543.534029                              | 0.958823902                        | 786.5466271                                    | 0.944519968                     |
| 1203.84125                                      | 3177.612759                              | 0.960939366                        | 1290.595762                                    | 0.946974552                     |
| 4728.954366                                     | 4455.147                                 | 0.963331722                        | 6235.764673                                    | 0.949935165                     |
| 1933.202173                                     | 1126.776361                              | 0.977939098                        | 2122.602758                                    | 0.970794246                     |
| 2893.512238                                     | 6643.535069                              | 0.977434676                        | 3219.980642                                    | 0.969791556                     |
| 1340.57084                                      | 2311.638435                              | 0.971217569                        | 1421.644263                                    | 0.960767452                     |
| 6122.206693                                     | 3659.138769                              | 0.986152552                        | 6557.901823                                    | 0.981500269                     |
| 1723.874801                                     | 3324.305067                              | 0.97638056                         | 1843.316971                                    | 0.968203163                     |
| 2299.21399                                      | 2295.290275                              | 0.979735104                        | 2480.95892                                     | 0.973008904                     |
| 1425.088958                                     | 1161.137029                              | 0.976005852                        | 1574.302703                                    | 0.967617672                     |
| 2609.466983                                     | 2489.201221                              | 0.975513334                        | 2885.677393                                    | 0.967073                        |
| 1490.305395                                     | 4094.76058                               | 0.972948972                        | 1605.117915                                    | 0.963646174                     |
| 712.1417035                                     | 787.7868666                              | 0.974804894                        | 767.8627837                                    | 0.966351674                     |
| 1463.924481                                     | 794.4424944                              | 0.982722419                        | 1565.56395                                     | 0.976859803                     |
| 704.6014863                                     | 1160.30811                               | 0.961707834                        | 786.3899601                                    | 0.94879381                      |
| 2011.475903                                     | 2339.738992                              | 0.976533167                        | 2190.499243                                    | 0.968739707                     |
| 3580.610295                                     | 3136.708968                              | 0.981965244                        | 3853.811072                                    | 0.975948703                     |
| 1735.772612                                     | 4127.671112                              | 0.977714902                        | 1874.882743                                    | 0.970216176                     |
| 1088.763283                                     | 986.5130667                              | 0.971718565                        | 1136.341355                                    | 0.962235229                     |
| 999.1576007                                     | 1194.390985                              | 0.973043037                        | 1078.42735                                     | 0.963678427                     |
| 801.772589                                      | 1747.531217                              | 0.972486455                        | 879.9257206                                    | 0.963629191                     |
| 2685.627885                                     | 3709.184972                              | 0.978290263                        | 2948.948499                                    | 0.970980318                     |
| 1607.717368                                     | 3110.180354                              | 0.973417666                        | 1765.464631                                    | 0.964519286                     |
| 1139.626898                                     | 1506.169775                              | 0.977363012                        | 1219.965603                                    | 0.970033607                     |
| 5336.995822                                     | 8111.13651                               | 0.970758355                        | 6805.104978                                    | 0.958930543                     |
| 917.9210894                                     | 1608.24376                               | 0.976514882                        | 989.6707577                                    | 0.968725499                     |
| 1106.740842                                     | 2397.138064                              | 0.973088878                        | 1185.01214                                     | 0.963439931                     |
| 1703.959302                                     | 5084.231077                              | 0.967550124                        | 1935.931392                                    | 0.956458878                     |
| 3385.668311                                     | 6941.054234                              | 0.976494336                        | 3759.671148                                    | 0.968728241                     |
| 646.0232457                                     | 698.5821104                              | 0.968968053                        | 692.3337301                                    | 0.959298929                     |
| 1280.100859                                     | 3315.156677                              | 0.961819256                        | 1435.939553                                    | 0.948790981                     |
| 750.457397                                      | 1150.427703                              | 0.968512455                        | 825.4039904                                    | 0.958352997                     |
| 3214.644976                                     | 5714.604771                              | 0.977553777                        | 3557.473104                                    | 0.970104615                     |
| 3063.342911                                     | 5403.548243                              | 0.979856032                        | 3231.551424                                    | 0.972892397                     |
| 1057.138213                                     | 2555.099865                              | 0.968454999                        | 1168.654368                                    | 0.957981632                     |
| 1161.171346                                     | 1151.292712                              | 0.969686552                        | 1248.046575                                    | 0.95949547                      |
| 855.7164082                                     | 3754.311951                              | 0.966691366                        | 916.5987865                                    | 0.955155101                     |
| 1116.91656                                      | 2003.085744                              | 0.967710862                        | 1200.230698                                    | 0.95639113                      |
| 2485.331621                                     | 2106.062466                              | 0.982452663                        | 2647.545626                                    | 0.976572343                     |
| 4977.42023                                      | 2852.499056                              | 0.976674186                        | 5579.125019                                    | 0.968994914                     |
| 2155.037859                                     | 1231.663597                              | 0.978388336                        | 2369.497766                                    | 0.971512094                     |
| 1528.635547                                     | 2179.159799                              | 0.976237999                        | 1632.64974                                     | 0.968087839                     |
| 363.2952577                                     | 827.7930694                              | 0.963372783                        | 393.8538884                                    | 0.951019753                     |
| 1095.726418                                     | 1532.663031                              | 0.972973115                        | 1169.000322                                    | 0.964129602                     |
| 3436.979047                                     | 2176.825305                              | 0.981950121                        | 3690.988575                                    | 0.976091032                     |
| 2083.406018                                     | 1856.467769                              | 0.982754293                        | 2179.869368                                    | 0.9768728                       |
| 1535.598264                                     | 1597.725316                              | 0.970353859                        | 1685.404955                                    | 0.959977765                     |
| 1712.549347                                     | 2756.038273                              | 0.957342902                        | 2046.330849                                    | 0.942231216                     |
| 1672.957947                                     | 2801.970331                              | 0.97684799                         | 1834.520215                                    | 0.96903552                      |
| 1859.115263                                     | 2253.665062                              | 0.980116172                        | 2049.94449                                     | 0.973538966                     |
| 233.8169263                                     | 1253.319424                              | 0.949517594                        | 265.21053                                      | 0.933370155                     |
| 2342.108494                                     | 2187.804763                              | 0.978425866                        | 2496.914327                                    | 0.970649895                     |
| 1125.272314                                     | 2432.571755                              | 0.970005203                        | 1202.707612                                    | 0.959911351                     |
| 947.9249389                                     | 1313.731752                              | 0.972835425                        | 1022.312835                                    | 0.963535099                     |
| 932.7440554                                     | 1778.138831                              | 0.967421915                        | 1006.214734                                    | 0.956391263                     |
| 416.6880715                                     | 1029.192783                              | 0.940596226                        | 462.713659                                     | 0.921602171                     |
| 2897.325083                                     | 2223.653618                              | 0.982671729                        | 3125.829722                                    | 0.977007004                     |
| 1893.615009                                     | 4769.155072                              | 0.979146973                        | 2050.683856                                    | 0.972112973                     |
| 2279.08563                                      | 3005.962663                              | 0.976602732                        | 2477.048225                                    | 0.968834499                     |
| 2354.75388                                      | 4010.240989                              | 0.979509182                        | 2556.915025                                    | 0.972673925                     |
| 1394.238572                                     | 3028.141025                              | 0.96938192                         | 1497.545909                                    | 0.959110731                     |
| 2442.352355                                     | 2567.060997                              | 0.976699615                        | 2729.929283                                    | 0.968952241                     |
| 1327.214927                                     | 934.8910444                              | 0.971502625                        | 1402.773058                                    | 0.962016016                     |
| 870.0332373                                     | 752.1998938                              | 0.974064411                        | 951.6818371                                    | 0.965781221                     |
| 2518.038885                                     | 5122.563283                              | 0.970006768                        | 2846.562089                                    | 0.959833205                     |

| wavelet.LLL_glrmlongRunLowGrayLevelEmphasis | wavelet.LLL_glrmlongRunEntropy | wavelet.LLL_glrmlongRunHighGrayLevelRunEmphasis | wavelet.LLL_glrmlongRunLengthNonUniformityNormalized | wavelet.LLL_glszm_GrayLevelVariance |
|---------------------------------------------|--------------------------------|-------------------------------------------------|------------------------------------------------------|-------------------------------------|
| 0.002851903                                 | 6.440898571                    | 2076.131393                                     | 0.954991689                                          | 528.8088329                         |
| 0.008802142                                 | 5.554188809                    | 695.7581295                                     | 0.923746591                                          | 266.223934                          |
| 0.007209305                                 | 6.508644086                    | 2005.015262                                     | 0.915010931                                          | 567.4573059                         |
| 0.009297069                                 | 6.281409639                    | 1889.913096                                     | 0.938072633                                          | 668.631995                          |
| 0.005918152                                 | 5.922736253                    | 927.5378209                                     | 0.931169153                                          | 319.0005638                         |
| 0.005087426                                 | 5.676376676                    | 937.4475513                                     | 0.940242999                                          | 280.2752829                         |
| 0.002032071                                 | 6.613195314                    | 2764.865164                                     | 0.932266594                                          | 488.1883291                         |
| 0.004125531                                 | 5.849650391                    | 1024.358736                                     | 0.912135032                                          | 338.6471819                         |
| 0.001431552                                 | 6.334029305                    | 2431.291128                                     | 0.934014745                                          | 482.7503108                         |
| 0.006055453                                 | 6.035510215                    | 1235.539974                                     | 0.938137826                                          | 453.0048419                         |
| 0.004086288                                 | 5.956178534                    | 1148.368849                                     | 0.938372218                                          | 234.2628466                         |
| 0.002804674                                 | 5.91399787                     | 1219.173659                                     | 0.938656877                                          | 279.9126773                         |
| 0.011161271                                 | 5.308570622                    | 478.2374376                                     | 0.856810472                                          | 284.1126606                         |
| 0.005250638                                 | 6.053825487                    | 1364.355409                                     | 0.934257832                                          | 543.2285829                         |
| 0.002542069                                 | 6.008572809                    | 1737.688806                                     | 0.933290823                                          | 375.4493018                         |
| 0.001042207                                 | 6.325842174                    | 2827.37496                                      | 0.91441593                                           | 388.4916352                         |
| 0.002224839                                 | 6.060169075                    | 1826.626663                                     | 0.944725564                                          | 306.700912                          |
| 0.008430826                                 | 5.555359059                    | 628.834676                                      | 0.908330928                                          | 248.2570376                         |
| 0.006726116                                 | 5.729953142                    | 790.3107501                                     | 0.923095096                                          | 241.5035353                         |
| 0.001355745                                 | 6.112254077                    | 1942.146365                                     | 0.935836685                                          | 348.3453461                         |
| 0.015949948                                 | 5.668481294                    | 584.9400548                                     | 0.885624228                                          | 292.9974531                         |
| 0.005008429                                 | 5.786921739                    | 920.0234017                                     | 0.93625469                                           | 259.8429918                         |
| 0.00819061                                  | 5.785606094                    | 895.4477764                                     | 0.923218809                                          | 339.2792809                         |
| 0.002883715                                 | 6.530316521                    | 2285.57797                                      | 0.941556962                                          | 505.1470259                         |
| 0.003274233                                 | 5.645685804                    | 1090.934258                                     | 0.9181764                                            | 324.8510727                         |
| 0.002259374                                 | 6.380940551                    | 2118.973367                                     | 0.951426317                                          | 399.6192593                         |
| 0.001369263                                 | 6.534963685                    | 3015.350565                                     | 0.946467303                                          | 431.1867163                         |
| 0.001756793                                 | 5.985937871                    | 1683.006981                                     | 0.931398906                                          | 358.1782487                         |
| 0.005469053                                 | 5.677960617                    | 1244.911541                                     | 0.934058641                                          | 215.0442287                         |
| 0.008101796                                 | 5.806874448                    | 744.3054168                                     | 0.932129107                                          | 223.9328432                         |
| 0.005003821                                 | 5.95640345                     | 1065.872529                                     | 0.910024684                                          | 380.626416                          |
| 0.010587693                                 | 5.998507872                    | 906.524008                                      | 0.918266158                                          | 226.9654318                         |
| 0.00808525                                  | 6.402247729                    | 3881.977502                                     | 0.948413579                                          | 377.4329277                         |
| 0.003554487                                 | 6.563211416                    | 2617.682722                                     | 0.942315536                                          | 479.8654936                         |
| 0.004022457                                 | 6.197355432                    | 1346.256043                                     | 0.935749188                                          | 330.1681791                         |
| 0.008576584                                 | 5.653439527                    | 736.8467636                                     | 0.897598502                                          | 375.089191                          |
| 0.005040604                                 | 5.835468662                    | 1220.318696                                     | 0.901314839                                          | 708.653448                          |
| 0.001353936                                 | 6.979640603                    | 4981.677581                                     | 0.908370842                                          | 922.4594661                         |
| 0.002608711                                 | 6.293015761                    | 1968.59995                                      | 0.943404939                                          | 393.2194237                         |
| 0.001053508                                 | 6.406675251                    | 2955.26558                                      | 0.94215422                                           | 334.7782766                         |
| 0.004668484                                 | 6.088367034                    | 1355.942864                                     | 0.927251147                                          | 546.6703323                         |
| 0.001324557                                 | 6.733950043                    | 6206.6836                                       | 0.964005427                                          | 609.9578624                         |
| 0.002937393                                 | 6.313078117                    | 1746.612835                                     | 0.939690494                                          | 475.2887723                         |
| 0.002171505                                 | 6.476202505                    | 2334.424705                                     | 0.947925825                                          | 449.9279096                         |
| 0.004511164                                 | 6.033179598                    | 1453.099835                                     | 0.938772011                                          | 235.8063531                         |
| 0.00110141                                  | 6.198956124                    | 2661.344672                                     | 0.937502238                                          | 320.8780539                         |
| 0.002767792                                 | 6.225988533                    | 1512.206696                                     | 0.931223132                                          | 388.5738991                         |
| 0.007983735                                 | 5.70350528                     | 722.6120376                                     | 0.935729521                                          | 209.1504131                         |
| 0.003079358                                 | 5.992915102                    | 1483.615349                                     | 0.95546179                                           | 256.5109952                         |
| 0.004710522                                 | 5.390566228                    | 719.5772487                                     | 0.90421411                                           | 207.865099                          |
| 0.003316522                                 | 6.369194191                    | 2045.807654                                     | 0.939944582                                          | 385.2682982                         |
| 0.00093132                                  | 6.547464745                    | 3633.226884                                     | 0.953355407                                          | 484.0881402                         |
| 0.001694174                                 | 6.16078878                     | 1762.33737                                      | 0.942791317                                          | 301.4095846                         |
| 0.010103613                                 | 5.928725414                    | 1097.731185                                     | 0.928320429                                          | 533.2885846                         |
| 0.006086138                                 | 5.957748113                    | 1013.903113                                     | 0.931591147                                          | 332.4508899                         |
| 0.00113804                                  | 5.78288269                     | 816.8546337                                     | 0.929848336                                          | 194.4872877                         |
| 0.002621959                                 | 6.598190959                    | 2735.227514                                     | 0.944257662                                          | 487.0274848                         |
| 0.00505026                                  | 6.413989455                    | 1637.969772                                     | 0.932292564                                          | 479.6133291                         |
| 0.003038701                                 | 5.871637316                    | 1155.32367                                      | 0.941951439                                          | 273.7805384                         |
| 0.000793397                                 | 6.894660112                    | 5575.088734                                     | 0.926346116                                          | 762.271548                          |
| 0.007193269                                 | 5.926980532                    | 931.8493326                                     | 0.939880912                                          | 288.0315506                         |
| 0.004682938                                 | 6.002411547                    | 1121.605017                                     | 0.931669628                                          | 355.4957274                         |
| 0.00150064                                  | 5.929924023                    | 1747.334825                                     | 0.918069722                                          | 207.9199413                         |
| 0.0008717                                   | 6.465275878                    | 3457.194647                                     | 0.939778496                                          | 404.6150634                         |
| 0.007454725                                 | 5.477196955                    | 654.954746                                      | 0.921456822                                          | 231.0360174                         |
| 0.002153389                                 | 5.825058323                    | 1308.957816                                     | 0.904477031                                          | 318.3542894                         |
| 0.007490304                                 | 5.743170845                    | 764.9428378                                     | 0.920305771                                          | 229.5632664                         |
| 0.000899019                                 | 6.45895502                     | 3280.111882                                     | 0.942391626                                          | 394.4194097                         |
| 0.001611259                                 | 6.668542645                    | 3094.705037                                     | 0.948181612                                          | 963.9984422                         |
| 0.00350933                                  | 5.930734692                    | 1078.234692                                     | 0.920150741                                          | 251.9327708                         |
| 0.004456918                                 | 5.853150279                    | 1177.847259                                     | 0.923355262                                          | 443.7874444                         |
| 0.007518948                                 | 5.852161426                    | 867.3370068                                     | 0.916046639                                          | 370.8285107                         |
| 0.005919312                                 | 6.084124841                    | 1132.37505                                      | 0.918662731                                          | 421.954937                          |
| 0.002271224                                 | 6.433225182                    | 2516.992071                                     | 0.95459638                                           | 408.9272068                         |
| 0.000716684                                 | 6.429168294                    | 5091.960574                                     | 0.940122376                                          | 443.5743886                         |
| 0.002865564                                 | 6.236112054                    | 2196.250611                                     | 0.944476113                                          | 317.446917                          |
| 0.004186581                                 | 6.267326036                    | 1548.030825                                     | 0.939276915                                          | 442.2278746                         |
| 0.015091706                                 | 5.239361161                    | 369.0472542                                     | 0.908240567                                          | 144.0167076                         |
| 0.008707269                                 | 6.014796321                    | 1109.86128                                      | 0.93109484                                           | 391.8322275                         |
| 0.003048024                                 | 6.76177091                     | 3486.247827                                     | 0.953338169                                          | 644.2628597                         |
| 0.003000609                                 | 6.455050473                    | 2102.388142                                     | 0.955381578                                          | 598.0244804                         |
| 0.0023602                                   | 5.961611196                    | 1563.68757                                      | 0.924959131                                          | 395.2089331                         |
| 0.005662122                                 | 6.131238361                    | 1769.349781                                     | 0.894281578                                          | 807.459028                          |
| 0.003951094                                 | 6.374560785                    | 1703.787707                                     | 0.940753723                                          | 382.736528                          |
| 0.001975053                                 | 6.181303388                    | 1895.534617                                     | 0.948884796                                          | 280.6011413                         |
| 0.021770367                                 | 4.945422243                    | 239.619973                                      | 0.875928945                                          | 121.7136783                         |
| 0.003437045                                 | 6.618729879                    | 2372.043653                                     | 0.944847505                                          | 631.2725913                         |
| 0.003532709                                 | 5.952721722                    | 1140.058795                                     | 0.923985427                                          | 308.7816896                         |
| 0.007959497                                 | 5.994084936                    | 962.2495804                                     | 0.931032581                                          | 285.6641269                         |
| 0.00496511                                  | 5.825190958                    | 946.5721423                                     | 0.917835818                                          | 345.9543116                         |
| 0.012803996                                 | 5.014649857                    | 425.0998987                                     | 0.855856426                                          | 283.5728242                         |
| 0.001832121                                 | 6.547873948                    | 2940.881896                                     | 0.955271677                                          | 481.0212148                         |
| 0.001697391                                 | 6.205410869                    | 1923.671461                                     | 0.946411865                                          | 321.4823909                         |
| 0.001943195                                 | 6.464746245                    | 2317.458607                                     | 0.940056678                                          | 424.0385795                         |
| 0.001425102                                 | 6.391767637                    | 2393.453101                                     | 0.947246005                                          | 370.1966248                         |
| 0.003486079                                 | 6.171768375                    | 1414.128052                                     | 0.922440594                                          | 468.5028762                         |
| 0.003868491                                 | 6.623289321                    | 2496.49024                                      | 0.940315064                                          | 626.2211211                         |
| 0.011252253                                 | 5.931335309                    | 1341.321928                                     | 0.927778815                                          | 746.4369064                         |
| 0.009491507                                 | 5.889318096                    | 886.1295632                                     | 0.933700474                                          | 228.7165402                         |
| 0.001996277                                 | 6.358766611                    | 2579.623868                                     | 0.924051421                                          | 335.0261219                         |

| wavelet.LLL_glszm_SmallAreaHighGrayLevelEmphasis | wavelet.LLL_glszm_GrayLevelNonUniformityNormalized | wavelet.LLL_glszm_SizeZoneNonUniformityNormalized | wavelet.LLL_glszm_SizeZoneNonUniformity |
|--------------------------------------------------|----------------------------------------------------|---------------------------------------------------|-----------------------------------------|
| 2045.621675                                      | 0.01370968                                         | 0.643362557                                       | 1014.582752                             |
| 859.1621303                                      | 0.024530774                                        | 0.555015994                                       | 309.6989247                             |
| 2061.234885                                      | 0.01288779                                         | 0.52438476                                        | 461.9829739                             |
| 1833.249065                                      | 0.015343051                                        | 0.627554513                                       | 415.4410876                             |
| 992.2792621                                      | 0.020040793                                        | 0.541478202                                       | 804.6366083                             |
| 1013.00509                                       | 0.023169545                                        | 0.570127746                                       | 252.5665914                             |
| 2559.408322                                      | 0.012487198                                        | 0.566181691                                       | 2045.614448                             |
| 1188.746267                                      | 0.020851796                                        | 0.533632151                                       | 1550.735031                             |
| 2093.159255                                      | 0.016244044                                        | 0.573643106                                       | 1689.378947                             |
| 1447.218738                                      | 0.018122201                                        | 0.610295201                                       | 441.2434302                             |
| 1063.972649                                      | 0.019398021                                        | 0.550376492                                       | 544.8727273                             |
| 1255.450083                                      | 0.020169576                                        | 0.575172424                                       | 883.4648438                             |
| 712.4923447                                      | 0.027551801                                        | 0.473458192                                       | 365.9831824                             |
| 1534.564146                                      | 0.01857372                                         | 0.551208659                                       | 607.4319419                             |
| 1863.302979                                      | 0.018514293                                        | 0.61393212                                        | 800.5674847                             |
| 2395.959748                                      | 0.016469058                                        | 0.501774469                                       | 1244.902459                             |
| 1581.965676                                      | 0.018657108                                        | 0.573808297                                       | 472.2442284                             |
| 734.9498615                                      | 0.026362887                                        | 0.493990763                                       | 330.4798206                             |
| 836.5018187                                      | 0.022473758                                        | 0.522389863                                       | 403.2849741                             |
| 1895.97194                                       | 0.01758015                                         | 0.574259173                                       | 1935.253412                             |
| 766.7455278                                      | 0.024662226                                        | 0.494464252                                       | 721.9178082                             |
| 994.9490132                                      | 0.021555652                                        | 0.533316639                                       | 372.2550143                             |
| 1027.14772                                       | 0.021599598                                        | 0.540657439                                       | 330.8823529                             |
| 2064.496849                                      | 0.013666348                                        | 0.559352247                                       | 985.0193072                             |
| 1269.272773                                      | 0.023836334                                        | 0.549895866                                       | 403.0736698                             |
| 1903.416157                                      | 0.014693382                                        | 0.64025582                                        | 1107.002313                             |
| 2745.161117                                      | 0.013696162                                        | 0.592917495                                       | 1331.099777                             |
| 1690.444269                                      | 0.019663078                                        | 0.559470699                                       | 983.5494881                             |
| 1165.969209                                      | 0.023659868                                        | 0.567802356                                       | 167.5016949                             |
| 777.6581461                                      | 0.02200606                                         | 0.529616393                                       | 694.8567073                             |
| 1302.001132                                      | 0.018501434                                        | 0.559314906                                       | 1501.760521                             |
| 860.5668295                                      | 0.019675483                                        | 0.526695519                                       | 642.0418376                             |
| 3205.673586                                      | 0.01497303                                         | 0.594539856                                       | 1359.11811                              |
| 2283.047185                                      | 0.013274009                                        | 0.573653953                                       | 917.2726704                             |
| 1375.30706                                       | 0.016952711                                        | 0.588532256                                       | 1715.571527                             |
| 957.6369541                                      | 0.023327298                                        | 0.517147488                                       | 794.3385417                             |
| 1604.353123                                      | 0.021109297                                        | 0.514074583                                       | 999.8750643                             |
| 3277.829861                                      | 0.010415876                                        | 0.54104342                                        | 1610.686261                             |
| 1685.985316                                      | 0.015407171                                        | 0.550852083                                       | 457.2072289                             |
| 2437.474653                                      | 0.015004404                                        | 0.580204738                                       | 2879.556115                             |
| 1572.468609                                      | 0.017863385                                        | 0.572277332                                       | 911.6377903                             |
| 5226.448396                                      | 0.011320829                                        | 0.666065844                                       | 2020.843771                             |
| 1792.112919                                      | 0.015980939                                        | 0.584001223                                       | 1434.307003                             |
| 2151.747114                                      | 0.013711717                                        | 0.599426537                                       | 1056.189557                             |
| 1289.525912                                      | 0.019042136                                        | 0.57365185                                        | 485.8831169                             |
| 2408.544055                                      | 0.016362899                                        | 0.584840004                                       | 1069.087527                             |
| 1573.381814                                      | 0.016128347                                        | 0.568858439                                       | 1653.671483                             |
| 740.6907288                                      | 0.023150718                                        | 0.519974028                                       | 288.5855856                             |
| 1357.299164                                      | 0.018545034                                        | 0.635980077                                       | 405.1193093                             |
| 832.5018397                                      | 0.028527882                                        | 0.504456733                                       | 357.1553672                             |
| 1883.174933                                      | 0.015192554                                        | 0.565939834                                       | 971.7186954                             |
| 3270.264444                                      | 0.012976591                                        | 0.62588315                                        | 1546.557264                             |
| 1684.910521                                      | 0.016939497                                        | 0.590327643                                       | 1821.160778                             |
| 1389.481072                                      | 0.019256539                                        | 0.587521022                                       | 409.5021521                             |
| 1094.336598                                      | 0.01888275                                         | 0.544136627                                       | 451.0892642                             |
| 782.4718721                                      | 0.022650136                                        | 0.509795698                                       | 613.7940199                             |
| 2435.538206                                      | 0.013217838                                        | 0.597425416                                       | 1684.142249                             |
| 1508.840224                                      | 0.015005244                                        | 0.540955544                                       | 1182.52882                              |
| 1155.28949                                       | 0.020958972                                        | 0.569117064                                       | 633.9964093                             |
| 3946.165845                                      | 0.01004952                                         | 0.607730402                                       | 3617.819083                             |
| 926.9357987                                      | 0.020261523                                        | 0.563136737                                       | 654.3648881                             |
| 1203.142252                                      | 0.019247234                                        | 0.577186334                                       | 982.9483265                             |
| 1606.161813                                      | 0.020949034                                        | 0.525927033                                       | 1749.233313                             |
| 2867.008086                                      | 0.014355585                                        | 0.539455475                                       | 2709.68485                              |
| 782.8992144                                      | 0.026984396                                        | 0.547496664                                       | 255.6809422                             |
| 1402.758507                                      | 0.022914587                                        | 0.52993136                                        | 1125.044277                             |
| 771.978811                                       | 0.023295589                                        | 0.501469694                                       | 375.6008011                             |
| 2732.904932                                      | 0.0147424                                          | 0.561029702                                       | 2368.106373                             |
| 3249.291634                                      | 0.012164543                                        | 0.624500994                                       | 2584.185114                             |
| 1104.537927                                      | 0.020695932                                        | 0.508619451                                       | 856.0065359                             |
| 1339.472423                                      | 0.021199909                                        | 0.540535571                                       | 419.996139                              |
| 1029.0472                                        | 0.02074715                                         | 0.539985038                                       | 1332.143089                             |
| 1303.998724                                      | 0.017771972                                        | 0.552985323                                       | 741.5533184                             |
| 2334.415623                                      | 0.014163159                                        | 0.615513863                                       | 1021.753012                             |
| 4069.605781                                      | 0.014550338                                        | 0.576247788                                       | 1202.629133                             |
| 1828.44866                                       | 0.016763049                                        | 0.559401189                                       | 515.7678959                             |
| 1623.815233                                      | 0.015696568                                        | 0.59456524                                        | 950.7098186                             |
| 433.0407412                                      | 0.030644285                                        | 0.516162648                                       | 279.2439926                             |
| 1201.620005                                      | 0.018883832                                        | 0.558198682                                       | 614.5767484                             |
| 3102.898485                                      | 0.011007977                                        | 0.624539616                                       | 1074.20814                              |
| 2137.55102                                       | 0.013754986                                        | 0.653785028                                       | 970.2169811                             |
| 1569.521893                                      | 0.020501333                                        | 0.571975901                                       | 643.4728889                             |
| 1925.116404                                      | 0.017150698                                        | 0.559401908                                       | 967.2058994                             |
| 1455.51273                                       | 0.01546857                                         | 0.544638601                                       | 1111.062745                             |
| 1551.336223                                      | 0.017148259                                        | 0.568366113                                       | 970.7693208                             |
| 313.9353976                                      | 0.03854824                                         | 0.431001192                                       | 283.5987842                             |
| 2330.200915                                      | 0.012057858                                        | 0.620247188                                       | 1025.268603                             |
| 1326.005783                                      | 0.018846152                                        | 0.576484913                                       | 963.8827751                             |
| 974.9143872                                      | 0.018955805                                        | 0.562665433                                       | 519.340195                              |
| 1076.143449                                      | 0.021854925                                        | 0.52839454                                        | 630.3746857                             |
| 689.8572222                                      | 0.033424727                                        | 0.473733676                                       | 252.0263158                             |
| 2508.807218                                      | 0.012837179                                        | 0.61251927                                        | 1076.196357                             |
| 1776.015776                                      | 0.016985324                                        | 0.581509664                                       | 2082.967616                             |
| 2144.328175                                      | 0.013571391                                        | 0.558737772                                       | 1239.839117                             |
| 2101.690896                                      | 0.014899361                                        | 0.581873087                                       | 1772.385424                             |
| 1585.36516                                       | 0.017702172                                        | 0.575503995                                       | 1204.529861                             |
| 2152.216185                                      | 0.012784022                                        | 0.583327398                                       | 1112.405349                             |
| 1540.777072                                      | 0.020323298                                        | 0.558218857                                       | 360.0511628                             |
| 799.4065969                                      | 0.020764846                                        | 0.511552629                                       | 269.5882353                             |
| 2266.936547                                      | 0.015829861                                        | 0.529360653                                       | 1852.232924                             |

| wavelet.LLL_glszm_GrayLevelNonUniformity | wavelet.LLL_glszm_LargeAreaEmphasis | wavelet.LLL_glszm_ZoneVariance | wavelet.LLL_glszm_ZonePercentage | wavelet.LLL_glszm_LargeAreaLowGrayLevelEmphasis |
|------------------------------------------|-------------------------------------|--------------------------------|----------------------------------|-------------------------------------------------|
| 21.62016487                              | 2.738110336                         | 0.927490089                    | 0.743166824                      | 0.008493084                                     |
| 13.68817204                              | 5.672043011                         | 2.864316363                    | 0.596791444                      | 0.044548536                                     |
| 11.35414302                              | 7.334846765                         | 4.303058257                    | 0.574315515                      | 0.068108855                                     |
| 10.1570997                               | 3.986404834                         | 1.808328237                    | 0.677584442                      | 0.036493064                                     |
| 29.78061911                              | 4.35666218                          | 1.817293392                    | 0.627533784                      | 0.026843467                                     |
| 10.26410835                              | 3.616252822                         | 1.396623677                    | 0.671212121                      | 0.015193018                                     |
| 45.11624689                              | 7.838084694                         | 5.391756664                    | 0.639355866                      | 0.016665867                                     |
| 60.59532003                              | 8.731589814                         | 5.641930761                    | 0.568911511                      | 0.031497153                                     |
| 47.83870968                              | 4.535144312                         | 2.152340619                    | 0.647822261                      | 0.005629778                                     |
| 13.10235131                              | 3.753803596                         | 1.555371904                    | 0.674440299                      | 0.021686501                                     |
| 19.2040404                               | 3.719191919                         | 1.398955209                    | 0.656498674                      | 0.012189177                                     |
| 30.98046875                              | 3.757161458                         | 1.505207909                    | 0.66637744                       | 0.009792123                                     |
| 21.29754204                              | 25.00776197                         | 19.17425598                    | 0.414033208                      | 0.20064435                                      |
| 20.46823956                              | 4.133393829                         | 1.705792306                    | 0.641817123                      | 0.020988151                                     |
| 24.14263804                              | 4.76993865                          | 2.455060409                    | 0.657258065                      | 0.01051179                                      |
| 40.85973398                              | 7.524385328                         | 4.413377542                    | 0.566956124                      | 0.005013363                                     |
| 15.35479951                              | 3.188335358                         | 1.083544334                    | 0.689279732                      | 0.005362879                                     |
| 17.6367713                               | 9.950672646                         | 6.553841823                    | 0.542579075                      | 0.07975471                                      |
| 17.34974093                              | 5.344559585                         | 2.517631346                    | 0.594761171                      | 0.030552228                                     |
| 59.24510386                              | 4.585459941                         | 2.205444179                    | 0.648201577                      | 0.0060261                                       |
| 36.00684932                              | 14.87123288                         | 10.58122725                    | 0.482804233                      | 0.249297869                                     |
| 15.04584527                              | 3.769340974                         | 1.379703369                    | 0.646895273                      | 0.016309274                                     |
| 13.21895425                              | 6.673202614                         | 3.873595626                    | 0.59765625                       | 0.04876203                                      |
| 24.06643952                              | 3.638273708                         | 1.378894277                    | 0.665281451                      | 0.01153305                                      |
| 17.47203274                              | 6.893587995                         | 3.877466317                    | 0.575805185                      | 0.018708842                                     |
| 25.4048583                               | 2.914401388                         | 1.037073486                    | 0.729843816                      | 0.006255802                                     |
| 30.74788419                              | 3.210244989                         | 1.136388411                    | 0.694401485                      | 0.004848043                                     |
| 34.56769056                              | 4.757679181                         | 2.289312889                    | 0.636495293                      | 0.007681827                                     |
| 6.979661017                              | 3.528813559                         | 1.232818156                    | 0.659955257                      | 0.011846629                                     |
| 28.87195122                              | 3.963414634                         | 1.51247165                     | 0.638753651                      | 0.038320554                                     |
| 49.67635009                              | 11.31024209                         | 8.170020495                    | 0.564312736                      | 0.066571092                                     |
| 23.98441345                              | 6.8195242                           | 3.938721137                    | 0.589173514                      | 0.074640772                                     |
| 34.22834646                              | 2.915573053                         | 0.920389509                    | 0.70795912                       | 0.00177751                                      |
| 21.22514071                              | 3.439649781                         | 1.279724155                    | 0.680425532                      | 0.018149747                                     |
| 49.41715266                              | 4.168096055                         | 1.885560757                    | 0.661898274                      | 0.019257924                                     |
| 35.83072917                              | 13.86523438                         | 10.05307982                    | 0.512170724                      | 0.104598534                                     |
| 41.05758355                              | 12.67095116                         | 9.010959219                    | 0.522708949                      | 0.068672037                                     |
| 31.00806181                              | 8.852872019                         | 5.847418271                    | 0.576826196                      | 0.006202091                                     |
| 12.78795181                              | 3.212048193                         | 1.015938453                    | 0.674796748                      | 0.00634546                                      |
| 74.46685472                              | 3.43864598                          | 1.292890298                    | 0.682668501                      | 0.003488915                                     |
| 28.45637163                              | 5.782799749                         | 3.131197419                    | 0.614109483                      | 0.029071977                                     |
| 34.34739618                              | 2.053724456                         | 4.429233899                    | 0.784587536                      | 0.003752399                                     |
| 39.24918567                              | 3.607084691                         | 1.394791821                    | 0.672324117                      | 0.010611433                                     |
| 24.1600454                               | 2.920544835                         | 0.926711082                    | 0.708199357                      | 0.006312399                                     |
| 16.12868949                              | 3.775678867                         | 1.499036115                    | 0.662754304                      | 0.014813888                                     |
| 29.91137856                              | 3.811269147                         | 1.55634304                     | 0.665938069                      | 0.003214519                                     |
| 46.88510492                              | 5.007223942                         | 2.544472975                    | 0.637220517                      | 0.01616803                                      |
| 12.84864865                              | 3.944144144                         | 1.481223927                    | 0.637198622                      | 0.029562925                                     |
| 11.81318681                              | 2.46310832                          | 0.678346547                    | 0.74853114                       | 0.006145934                                     |
| 20.19774011                              | 11.21751412                         | 7.570924702                    | 0.523668639                      | 0.038488626                                     |
| 26.08561444                              | 3.612696564                         | 1.374039251                    | 0.668353445                      | 0.010257422                                     |
| 32.06515581                              | 2.637393768                         | 0.776283889                    | 0.733016909                      | 0.002021907                                     |
| 52.25834684                              | 3.44376013                          | 1.3046761                      | 0.68373227                       | 0.005734883                                     |
| 13.42180775                              | 5.004304161                         | 2.495466325                    | 0.63134058                       | 0.042851349                                     |
| 15.65379976                              | 4.704463209                         | 2.13054809                     | 0.623308271                      | 0.022131181                                     |
| 27.27076412                              | 4.343853821                         | 1.720745566                    | 0.617435897                      | 0.023884877                                     |
| 37.26108549                              | 3.253281305                         | 1.194326091                    | 0.696909765                      | 0.008704595                                     |
| 32.80146386                              | 4.429094236                         | 1.926734966                    | 0.632157316                      | 0.022992744                                     |
| 23.34829443                              | 3.31956912                          | 1.131081808                    | 0.675970874                      | 0.009007244                                     |
| 59.82479422                              | 14.04585923                         | 11.6941986                     | 0.652097711                      | 0.003015853                                     |
| 23.54389895                              | 3.772805508                         | 1.463033348                    | 0.657984145                      | 0.024205924                                     |
| 32.77803876                              | 5.107457428                         | 2.649393199                    | 0.637827715                      | 0.022595365                                     |
| 69.67648827                              | 6.593205051                         | 3.56376328                     | 0.574537917                      | 0.008603473                                     |
| 72.10810273                              | 3.4602827                           | 1.157115414                    | 0.658926932                      | 0.002366765                                     |
| 12.60171306                              | 6.239828694                         | 3.378152956                    | 0.591139241                      | 0.040809661                                     |
| 48.64766839                              | 10.89495996                         | 7.585748267                    | 0.549715173                      | 0.020788486                                     |
| 17.44859813                              | 6                                   | 2.96896084                     | 0.574386503                      | 0.040488738                                     |
| 62.22767117                              | 3.342335939                         | 1.149887794                    | 0.67536                          | 0.00248549                                      |
| 50.33687772                              | 3.164088932                         | 1.160680601                    | 0.706505037                      | 0.005524139                                     |
| 34.83125371                              | 6.070112894                         | 3.105086728                    | 0.580745342                      | 0.019951879                                     |
| 16.47232947                              | 5.643500644                         | 2.848536347                    | 0.598152425                      | 0.020234678                                     |
| 51.18321848                              | 8.893392785                         | 5.869431091                    | 0.575058275                      | 0.071026003                                     |
| 23.83221477                              | 6.90305742                          | 4.014831942                    | 0.588415972                      | 0.050080313                                     |
| 23.51084337                              | 2.562048193                         | 0.710153506                    | 0.734838424                      | 0.005150329                                     |
| 30.36655486                              | 4.038811691                         | 1.788092899                    | 0.666560204                      | 0.00171295                                      |
| 15.45553145                              | 3.043383948                         | 0.924812136                    | 0.687034277                      | 0.006396547                                     |
| 25.09881176                              | 3.742338962                         | 1.497026949                    | 0.667362227                      | 0.014652825                                     |
| 16.57855823                              | 7.260628466                         | 4.124914156                    | 0.564718163                      | 0.090981215                                     |
| 20.791099                                | 4.031789282                         | 1.628022085                    | 0.644991213                      | 0.035129185                                     |
| 18.93372093                              | 2.665697674                         | 0.81641394                     | 0.73535699                       | 0.010226444                                     |
| 20.41239892                              | 2.747304582                         | 0.950909885                    | 0.74610357                       | 0.008876137                                     |
| 23.064                                   | 5.638222222                         | 3.081065877                    | 0.625347415                      | 0.012569667                                     |
| 29.65355697                              | 12.42394448                         | 8.849242383                    | 0.528907923                      | 0.065410446                                     |
| 31.55588235                              | 3.403431373                         | 1.134273116                    | 0.663846404                      | 0.015392699                                     |
| 29.28922717                              | 2.902224824                         | 0.863080955                    | 0.700287003                      | 0.00443832                                      |
| 25.36474164                              | 19.79331307                         | 14.37248362                    | 0.429503916                      | 0.313017272                                     |
| 19.93163944                              | 3.961887477                         | 1.88012556                     | 0.693081761                      | 0.018916527                                     |
| 31.51076555                              | 5.753588517                         | 3.064145452                    | 0.609773888                      | 0.020857585                                     |
| 17.49620802                              | 4.966413868                         | 2.450598583                    | 0.630464481                      | 0.047768446                                     |
| 26.0729254                               | 5.984073764                         | 3.102901882                    | 0.589135802                      | 0.028854553                                     |
| 17.78195489                              | 22.32330827                         | 16.31528068                    | 0.40797546                       | 0.217285093                                     |
| 22.55492316                              | 2.505406944                         | 0.667430287                    | 0.737615449                      | 0.004232504                                     |
| 60.84142937                              | 3.144891122                         | 1.051206541                    | 0.691105537                      | 0.004861401                                     |
| 30.11491663                              | 3.397926994                         | 1.186292905                    | 0.672424242                      | 0.006401383                                     |
| 45.38345371                              | 2.960604071                         | 0.91925171                     | 0.699908088                      | 0.004076736                                     |
| 37.05064501                              | 6.722408027                         | 4.049268955                    | 0.6111630625                     | 0.028117044                                     |
| 24.37912952                              | 3.629260619                         | 1.447172383                    | 0.676961306                      | 0.012640991                                     |
| 13.10852713                              | 5.446511628                         | 2.81155219                     | 0.616045845                      | 0.067434056                                     |
| 10.943074                                | 3.874762808                         | 1.370321428                    | 0.631894484                      | 0.040597531                                     |
| 55.38868248                              | 5.373535296                         | 2.650422229                    | 0.60599238                       | 0.011618985                                     |

| wavelet.LLL_glszm_LargeAreaHighGrayLevelEmphasis | wavelet.LLL_glszm_HighGrayLevelZoneEmphasis | wavelet.LLL_glszm_SmallAreaEmphasis | wavelet.LLL_glszm_LowGrayLevelZoneEmphasis | wavelet.LLL_glszm_ZoneEntropy |
|--------------------------------------------------|---------------------------------------------|-------------------------------------|--------------------------------------------|-------------------------------|
| 4001.668992                                      | 2318.147115                                 | 0.829675911                         | 0.002517773                                | 7.246011207                   |
| 2011.756272                                      | 942.6899642                                 | 0.772435988                         | 0.006659699                                | 6.760802144                   |
| 7100.281498                                      | 2504.4563                                   | 0.752326283                         | 0.004717854                                | 7.526445319                   |
| 5128.850453                                      | 2125.057402                                 | 0.81856161                          | 0.006226156                                | 7.104332475                   |
| 2489.24428                                       | 1148.370794                                 | 0.764272085                         | 0.004848809                                | 7.122791283                   |
| 2215.546275                                      | 1137.191874                                 | 0.783468528                         | 0.005216381                                | 6.678039609                   |
| 10117.52256                                      | 3118.887351                                 | 0.781045247                         | 0.001711306                                | 7.627273172                   |
| 4246.611493                                      | 1362.008603                                 | 0.758653434                         | 0.003630883                                | 7.231224619                   |
| 12638.31375                                      | 2537.071307                                 | 0.785750595                         | 0.001311304                                | 7.379988726                   |
| 2619.84509                                       | 1565.868603                                 | 0.808072022                         | 0.005061341                                | 6.97229831                    |
| 3391.119192                                      | 1286.773737                                 | 0.770425042                         | 0.004203333                                | 6.978145136                   |
| 3209.832682                                      | 1436.532552                                 | 0.786855833                         | 0.002587295                                | 6.978944668                   |
| 4597.773609                                      | 809.8447607                                 | 0.715072912                         | 0.008699701                                | 6.997413258                   |
| 3236.629764                                      | 1729.537205                                 | 0.770890763                         | 0.00396231                                 | 7.203403662                   |
| 5027.40184                                       | 2096.935583                                 | 0.81071061                          | 0.001833952                                | 7.036239925                   |
| 18607.62918                                      | 3078.007255                                 | 0.736428666                         | 0.001105281                                | 7.605288441                   |
| 4802.482382                                      | 1953.206561                                 | 0.786079748                         | 0.002441762                                | 6.980387205                   |
| 2692.87145                                       | 852.8729447                                 | 0.730674235                         | 0.006683835                                | 6.845860949                   |
| 2632.797927                                      | 984.3484456                                 | 0.750971846                         | 0.006496498                                | 6.903932108                   |
| 6077.660237                                      | 2239.35638                                  | 0.786059329                         | 0.001206021                                | 7.270262029                   |
| 2823.661644                                      | 891.1349315                                 | 0.730822152                         | 0.007747256                                | 7.115727979                   |
| 2381.309456                                      | 1129.416905                                 | 0.75868943                          | 0.004502539                                | 6.863411736                   |
| 2650.990196                                      | 1179.616013                                 | 0.763446759                         | 0.007604509                                | 6.965743766                   |
| 6620.455423                                      | 2508.535491                                 | 0.776561035                         | 0.002382493                                | 7.478946375                   |
| 4234.832196                                      | 1432.841746                                 | 0.768724488                         | 0.003150251                                | 6.898731836                   |
| 5286.222094                                      | 2233.133025                                 | 0.82741395                          | 0.002159135                                | 7.181675992                   |
| 7738.381292                                      | 3283.079733                                 | 0.798389357                         | 0.001216135                                | 7.422293727                   |
| 5245.916382                                      | 1988.950512                                 | 0.776452571                         | 0.001638393                                | 7.153080921                   |
| 3767.2                                           | 1376.583051                                 | 0.781465544                         | 0.006393993                                | 6.501053701                   |
| 1958.186738                                      | 900.4085366                                 | 0.756295459                         | 0.005655066                                | 6.92729376                    |
| 4090.224953                                      | 1469.282309                                 | 0.775706899                         | 0.003498158                                | 7.266493813                   |
| 3327.706317                                      | 1068.584085                                 | 0.754065154                         | 0.007222843                                | 7.078928057                   |
| 10793.70866                                      | 3961.911636                                 | 0.799594454                         | 0.000969024                                | 7.350701813                   |
| 7520.934334                                      | 2810.357724                                 | 0.785795218                         | 0.00266848                                 | 7.470502847                   |
| 3518.740995                                      | 1584.469983                                 | 0.79519448                          | 0.002897571                                | 7.205000744                   |
| 3580.865885                                      | 1090.582031                                 | 0.746902958                         | 0.006559709                                | 7.152860715                   |
| 4929.08946                                       | 1817.081234                                 | 0.744917451                         | 0.003543621                                | 7.373383114                   |
| 74632.7222                                       | 4360.546523                                 | 0.763841241                         | 0.001343861                                | 7.992250252                   |
| 5578.512048                                      | 2093.340964                                 | 0.770857642                         | 0.002835532                                | 7.222005579                   |
| 9426.817852                                      | 3033.79327                                  | 0.790269835                         | 0.001004135                                | 7.379594662                   |
| 3639.962963                                      | 1772.373509                                 | 0.784188813                         | 0.003573543                                | 7.308078194                   |
| 12570.44067                                      | 6209.031971                                 | 0.843419796                         | 0.000793347                                | 7.478464608                   |
| 4289.554153                                      | 2056.192997                                 | 0.792481498                         | 0.002398835                                | 7.366476245                   |
| 5582.211124                                      | 2538.293417                                 | 0.802635573                         | 0.00191829                                 | 7.370586923                   |
| 4479.924439                                      | 1572.930342                                 | 0.785797408                         | 0.003385483                                | 6.93980731                    |
| 8629.038293                                      | 2884.904267                                 | 0.792898895                         | 0.00118574                                 | 7.229530954                   |
| 4361.218438                                      | 1826.48882                                  | 0.782552644                         | 0.002172652                                | 7.329785713                   |
| 1964.526126                                      | 866.3567568                                 | 0.749471281                         | 0.007513795                                | 6.790052381                   |
| 3131.32967                                       | 1581.836735                                 | 0.825132566                         | 0.003222652                                | 6.733388065                   |
| 4655.449153                                      | 962.6398305                                 | 0.738192863                         | 0.004492012                                | 6.760167963                   |
| 5713.295282                                      | 2267.776937                                 | 0.780896307                         | 0.003348069                                | 7.366669665                   |
| 8460.686362                                      | 3843.911372                                 | 0.819093812                         | 0.000966369                                | 7.416176892                   |
| 4686.067747                                      | 1971.635332                                 | 0.796596554                         | 0.001542828                                | 7.164586445                   |
| 2539.327116                                      | 1487.71736                                  | 0.793684644                         | 0.008944302                                | 7.015814362                   |
| 3185.144753                                      | 1250.855247                                 | 0.7660615                           | 0.005811203                                | 7.079813542                   |
| 2579.848837                                      | 954.0299003                                 | 0.742166466                         | 0.005492045                                | 6.95327934                    |
| 7804.784321                                      | 2906.383115                                 | 0.801292142                         | 0.002178315                                | 7.495230387                   |
| 5137.764867                                      | 1852.881976                                 | 0.764002279                         | 0.003913637                                | 7.515931043                   |
| 2832.824955                                      | 1339.386894                                 | 0.782971176                         | 0.00290981                                 | 6.940166073                   |
| 159760.2935                                      | 4937.649924                                 | 0.807568594                         | 0.000814963                                | 7.835767524                   |
| 2512.600688                                      | 1083.494836                                 | 0.778906066                         | 0.006907772                                | 7.001570944                   |
| 3218.442161                                      | 1377.42983                                  | 0.787853412                         | 0.003935545                                | 7.114799343                   |
| 8754.625075                                      | 1991.801263                                 | 0.753281512                         | 0.00120341                                 | 7.214952616                   |
| 10926.70575                                      | 3632.338841                                 | 0.763120262                         | 0.000905556                                | 7.608738733                   |
| 2268.899358                                      | 872.1991435                                 | 0.767920346                         | 0.006717775                                | 6.58816518                    |
| 7927.681112                                      | 1658.472916                                 | 0.756034529                         | 0.001822516                                | 7.169585015                   |
| 2801.539386                                      | 940.5794393                                 | 0.736057847                         | 0.005915981                                | 6.956722802                   |
| 10026.35537                                      | 3421.60886                                  | 0.777700399                         | 0.000893934                                | 7.512789359                   |
| 6611.502175                                      | 3623.222571                                 | 0.817658512                         | 0.001342317                                | 7.654372496                   |
| 4266.716578                                      | 1320.480689                                 | 0.74126759                          | 0.003017134                                | 7.174823037                   |
| 3537.989704                                      | 1533.722008                                 | 0.76320879                          | 0.004122716                                | 7.031536727                   |
| 2946.158087                                      | 1175.414268                                 | 0.763003966                         | 0.005590111                                | 7.201207158                   |
| 3508.032066                                      | 1490.235645                                 | 0.771624887                         | 0.004134443                                | 7.247443264                   |
| 5315.096386                                      | 2726.653614                                 | 0.812888919                         | 0.002295712                                | 7.258122568                   |
| 19764.96885                                      | 5135.922856                                 | 0.787538614                         | 0.000856258                                | 7.470442384                   |
| 6059.004338                                      | 2291.523861                                 | 0.776648562                         | 0.003024105                                | 7.143224113                   |
| 3820.636648                                      | 1845.03252                                  | 0.798529572                         | 0.00373107                                 | 7.286561009                   |
| 1344.972274                                      | 497.4011091                                 | 0.746415434                         | 0.012652655                                | 6.497976592                   |
| 2789.599455                                      | 1368.721163                                 | 0.775456461                         | 0.006056241                                | 7.105386544                   |
| 7674.918023                                      | 3681.682558                                 | 0.818398838                         | 0.00239952                                 | 7.517965578                   |
| 3896.960243                                      | 2384.510782                                 | 0.835698578                         | 0.00263965                                 | 7.260811078                   |
| 5221.594667                                      | 1853.566222                                 | 0.784327633                         | 0.002211266                                | 7.032868373                   |
| 14341.39676                                      | 2248.120301                                 | 0.775013917                         | 0.004411271                                | 7.472429882                   |
| 4758.560784                                      | 1831.02402                                  | 0.766683898                         | 0.003238183                                | 7.366627362                   |
| 5365.803279                                      | 1941.115925                                 | 0.782102903                         | 0.002132188                                | 7.139320956                   |
| 2072.756839                                      | 372.5364742                                 | 0.68223265                          | 0.017373075                                | 6.609541402                   |
| 5417.15124                                       | 2707.720508                                 | 0.815200442                         | 0.002756458                                | 7.465093096                   |
| 3438.053828                                      | 1481.639354                                 | 0.78673879                          | 0.002824346                                | 7.109597653                   |
| 2684.627302                                      | 1154.221018                                 | 0.778282356                         | 0.00599749                                 | 6.995857946                   |
| 3018.182733                                      | 1234.274099                                 | 0.754917508                         | 0.003944012                                | 7.081253987                   |
| 3452.048872                                      | 759.9116541                                 | 0.714722948                         | 0.00895387                                 | 6.740859115                   |
| 6678.928287                                      | 3036.648833                                 | 0.811088731                         | 0.001800404                                | 7.356305003                   |
| 4962.983529                                      | 2111.726689                                 | 0.791185972                         | 0.001525177                                | 7.246648333                   |
| 6118.713835                                      | 2582.790446                                 | 0.776143884                         | 0.01786939                                 | 7.487410241                   |
| 6092.893631                                      | 2552.184504                                 | 0.791477858                         | 0.001299721                                | 7.344351603                   |
| 4401.594362                                      | 1804.225514                                 | 0.786501077                         | 0.002603951                                | 7.285669214                   |
| 8287.904038                                      | 2628.584164                                 | 0.792170646                         | 0.003311422                                | 7.525398018                   |
| 3361.435659                                      | 1754.72093                                  | 0.775082383                         | 0.007773984                                | 7.065016111                   |
| 2526.066414                                      | 1006.565465                                 | 0.743156126                         | 0.007500238                                | 6.883772653                   |
| 11033.63818                                      | 2841.918548                                 | 0.755930102                         | 0.001496039                                | 7.517426368                   |
